# Supplementary material for: Proteome-wide analysis of a malaria vaccine study reveals personalized humoral immune profiles in Tanzanian adults
Source: eLife. 2020 Jul 14;9:e53080. doi: 10.7554/eLife.53080 (PMC7386907; doi:10.7554/eLife.53080)
Supplement: Figure 2—source data 1. — This table includes log2 signal intensities of each of the 7’455 protein spots for all samples. Serum draw, immunization dose, protection after CHMI, and description of each protein fragment are specified. [file elife-53080-fig2-data1.xlsx]

## Sheet: Figure2_source-data-1
Sample.ID	Subject.ID	Serum.Draw	Total.Dose	Protection.3.wk	Unique.ID	ID	Gene.ID	Description	Chip	Norm.MFI
144-V05C	BSPZV1-144	2 wks post final dose	675000	Not Protected	PF3D7_0728100.s6_4837	PF3D7_0728100.s6	PF3D7_0728100	conserved Plasmodium membrane protein, unknown function	Pf4500-4	1.15921
144-V05C	BSPZV1-144	2 wks post final dose	675000	Not Protected	PF3D7_1003900.iso1.exon2.amp1_4430	PF3D7_1003900.iso1.exon2.amp1	PF3D7_1003900	conserved Plasmodium protein, unknown function	Pf4000-5	-0.0199353
144-V05C	BSPZV1-144	2 wks post final dose	675000	Not Protected	PF3D7_0616800.iso1.exon1.amp1_2475	PF3D7_0616800.iso1.exon1.amp1	PF3D7_0616800	malate:quinone oxidoreductase, putative	Pf4000-5	0.639804
144-V05C	BSPZV1-144	2 wks post final dose	675000	Not Protected	PF3D7_0905200.iso1.exon1.amp1_535	PF3D7_0905200.iso1.exon1.amp1	PF3D7_0905200	mitochondrial carrier protein, putative	Pf4000-5	1.58852
144-V05C	BSPZV1-144	2 wks post final dose	675000	Not Protected	PF3D7_0809900.iso1.exon4.amp1_1828	PF3D7_0809900.iso1.exon4.amp1	PF3D7_0809900	JmjC domain containing protein	Pf4000-5	0.300908
144-V05C	BSPZV1-144	2 wks post final dose	675000	Not Protected	PF3D7_1449400.e2s1_5668	PF3D7_1449400.e2s1	PF3D7_1449400	DNA replication related protein, putative	Pf4500-4	-0.27196
144-V05C	BSPZV1-144	2 wks post final dose	675000	Not Protected	PF3D7_1244700.iso1.exon2.amp1_982	PF3D7_1244700.iso1.exon2.amp1	PF3D7_1244700	conserved Plasmodium protein, unknown function	Pf4000-5	0.278068
144-V05C	BSPZV1-144	2 wks post final dose	675000	Not Protected	PF3D7_0415300.iso1.exon2.amp1_1868	PF3D7_0415300.iso1.exon2.amp1	PF3D7_0415300	cdc2-related protein kinase 3	Pf4000-5	0.153487
144-V05C	BSPZV1-144	2 wks post final dose	675000	Not Protected	PF3D7_0514500.iso1.exon5.amp1_1198	PF3D7_0514500.iso1.exon5.amp1	PF3D7_0514500	conserved Plasmodium membrane protein, unknown function	Pf4000-5	0.358407
144-V05C	BSPZV1-144	2 wks post final dose	675000	Not Protected	PF3D7_1330800.e2s1_8645	PF3D7_1330800.e2s1	PF3D7_1330800	conserved Plasmodium protein, unknown function	Pf4500-4	0.321967
144-V05C	BSPZV1-144	2 wks post final dose	675000	Not Protected	PF3D7_1310100.iso1.exon1.amp1_seg1_847	PF3D7_1310100.iso1.exon1.amp1_seg1	PF3D7_1310100	conserved Plasmodium protein, unknown function	Pf4000-5	0.309081
144-V05C	BSPZV1-144	2 wks post final dose	675000	Not Protected	PF3D7_0724200.1o1_5295	PF3D7_0724200.1o1	PF3D7_0724200	immunoglobulin-binding protein 1-related, putative	Pf4500-4	0.260271
144-V05C	BSPZV1-144	2 wks post final dose	675000	Not Protected	PF3D7_0311200.1o2_9124	PF3D7_0311200.1o2	PF3D7_0311200	valine-tRNA ligase, putative	Pf4500-4	-0.00714339
144-V05C	BSPZV1-144	2 wks post final dose	675000	Not Protected	PF3D7_0309000.iso1.exon1.amp1_144	PF3D7_0309000.iso1.exon1.amp1	PF3D7_0309000	dual specificity phosphatase	Pf4000-5	1.02881
144-V05C	BSPZV1-144	2 wks post final dose	675000	Not Protected	PF3D7_0213600.iso1.exon10.amp1_1246	PF3D7_0213600.iso1.exon10.amp1	PF3D7_0213600	conserved Plasmodium protein, unknown function	Pf4000-5	-0.176473
144-V05C	BSPZV1-144	2 wks post final dose	675000	Not Protected	PF3D7_0804500.e2s2_5372	PF3D7_0804500.e2s2	PF3D7_0804500	conserved Plasmodium membrane protein, unknown function	Pf4500-4	-0.0102435
144-V05C	BSPZV1-144	2 wks post final dose	675000	Not Protected	PF3D7_0932700.iso1.exon1.amp2_4526	PF3D7_0932700.iso1.exon1.amp2	PF3D7_0932700	conserved Plasmodium protein, unknown function	Pf4000-5	0.168891
144-V05C	BSPZV1-144	2 wks post final dose	675000	Not Protected	PF3D7_1313300.iso1.exon1.amp1_4119	PF3D7_1313300.iso1.exon1.amp1	PF3D7_1313300	peptidyl-prolyl cis-trans isomerase, putative	Pf4000-5	0.469243
144-V05C	BSPZV1-144	2 wks post final dose	675000	Not Protected	PF3D7_1123300.1o1_5907	PF3D7_1123300.1o1	PF3D7_1123300	conserved Plasmodium protein, unknown function	Pf4500-4	-0.30085
144-V05C	BSPZV1-144	2 wks post final dose	675000	Not Protected	PF3D7_0533100.iso1.exon1.amp3_1389	PF3D7_0533100.iso1.exon1.amp3	PF3D7_0533100	erythrocyte membrane protein 1 (PfEMP1), truncated	Pf4000-5	0.0549684
144-V05C	BSPZV1-144	2 wks post final dose	675000	Not Protected	PF3D7_1320300.iso1.exon1.amp1_2467	PF3D7_1320300.iso1.exon1.amp1	PF3D7_1320300	conserved Plasmodium protein, unknown function	Pf4000-5	0.309561
144-V05C	BSPZV1-144	2 wks post final dose	675000	Not Protected	PF3D7_0900600.iso1.exon1.amp1_424	PF3D7_0900600.iso1.exon1.amp1	PF3D7_0900600	rifin	Pf4000-5	0.435238
144-V05C	BSPZV1-144	2 wks post final dose	675000	Not Protected	PF3D7_0300700.iso1.exon2.amp1_3592	PF3D7_0300700.iso1.exon2.amp1	PF3D7_0300700	rifin	Pf4000-5	1.1651
144-V05C	BSPZV1-144	2 wks post final dose	675000	Not Protected	PF3D7_0917400.iso1.exon1.amp2_seg2_280	PF3D7_0917400.iso1.exon1.amp2_seg2	PF3D7_0917400	conserved Plasmodium protein, unknown function	Pf4000-5	0.716749
144-V05C	BSPZV1-144	2 wks post final dose	675000	Not Protected	PF3D7_0318600.iso1.exon1.amp2_200	PF3D7_0318600.iso1.exon1.amp2	PF3D7_0318600	cleavage and polyadenylation specifity factor, putative	Pf4000-5	0.53494
144-V05C	BSPZV1-144	2 wks post final dose	675000	Not Protected	PF3D7_0524800.iso1.exon1.amp1_2188	PF3D7_0524800.iso1.exon1.amp1	PF3D7_0524800	ubiquitin fusion degradation protein UFD1, putative	Pf4000-5	1.603
144-V05C	BSPZV1-144	2 wks post final dose	675000	Not Protected	PF3D7_1364400.e1s1_6274	PF3D7_1364400.e1s1	PF3D7_1364400	conserved Plasmodium protein, unknown function	Pf4500-4	1.17976
144-V05C	BSPZV1-144	2 wks post final dose	675000	Not Protected	PF3D7_1462000.1o1_4944	PF3D7_1462000.1o1	PF3D7_1462000	thioredoxin-like protein (TLP1)	Pf4500-4	-0.0483717
144-V05C	BSPZV1-144	2 wks post final dose	675000	Not Protected	PF3D7_1435700.iso2.exon10.amp1_990	PF3D7_1435700.iso2.exon10.amp1	PF3D7_1435700	conserved Plasmodium protein, unknown function	Pf4000-5	0.195068
144-V05C	BSPZV1-144	2 wks post final dose	675000	Not Protected	PF3D7_0900900.iso1.exon1.amp1_4454	PF3D7_0900900.iso1.exon1.amp1	PF3D7_0900900	stevor	Pf4000-5	1.07362
144-V05C	BSPZV1-144	2 wks post final dose	675000	Not Protected	PF3D7_0400200.iso1.exon1.amp1_1876	PF3D7_0400200.iso1.exon1.amp1	PF3D7_0400200	erythrocyte membrane protein 1 (PfEMP1), exon2	Pf4000-5	1.09796
144-V05C	BSPZV1-144	2 wks post final dose	675000	Not Protected	PF3D7_1305300.iso1.exon2.amp3_775	PF3D7_1305300.iso1.exon2.amp3	PF3D7_1305300	conserved Plasmodium protein, unknown function	Pf4000-5	0.339755
144-V05C	BSPZV1-144	2 wks post final dose	675000	Not Protected	PF3D7_0715800.1o1_6729	PF3D7_0715800.1o1	PF3D7_0715800	drug/metabolite exporter, drug/metabolite transporter	Pf4500-4	0.489082
144-V05C	BSPZV1-144	2 wks post final dose	675000	Not Protected	PF3D7_1414400.e1s1_5149	PF3D7_1414400.e1s1	PF3D7_1414400	serine/threonine protein phosphatase (PP1)	Pf4500-4	0.344894
144-V05C	BSPZV1-144	2 wks post final dose	675000	Not Protected	PF3D7_1329400.iso1.exon1.amp1_1509	PF3D7_1329400.iso1.exon1.amp1	PF3D7_1329400	AMP deaminase, putative	Pf4000-5	-0.739674
144-V05C	BSPZV1-144	2 wks post final dose	675000	Not Protected	PF3D7_0722000.iso1.exon1.amp1_3576	PF3D7_0722000.iso1.exon1.amp1	PF3D7_0722000	conserved Plasmodium protein, unknown function	Pf4000-5	0.145634
144-V05C	BSPZV1-144	2 wks post final dose	675000	Not Protected	PF3D7_1123000.iso1.exon1.amp1_3137	PF3D7_1123000.iso1.exon1.amp1	PF3D7_1123000	conserved Plasmodium protein, unknown function	Pf4000-5	0.541756
144-V05C	BSPZV1-144	2 wks post final dose	675000	Not Protected	PF3D7_1358800_7424	PF3D7_1358800	PF3D7_1358800	40S ribosomal protein S13, putative	Pf4500-4	0.109554
144-V05C	BSPZV1-144	2 wks post final dose	675000	Not Protected	PF3D7_1470800.iso1.exon1.amp1_3209	PF3D7_1470800.iso1.exon1.amp1	PF3D7_1470800	conserved Plasmodium protein, unknown function	Pf4000-5	0.059915
144-V05C	BSPZV1-144	2 wks post final dose	675000	Not Protected	PF3D7_1202300.e14s1_9188	PF3D7_1202300.e14s1	PF3D7_1202300	dynein heavy chain, putative	Pf4500-4	-0.274287
144-V05C	BSPZV1-144	2 wks post final dose	675000	Not Protected	PF3D7_1208100.e2s1_5771	PF3D7_1208100.e2s1	PF3D7_1208100	conserved Plasmodium protein, unknown function	Pf4500-4	-0.0688301
144-V05C	BSPZV1-144	2 wks post final dose	675000	Not Protected	PF3D7_0920300.1o4_5819	PF3D7_0920300.1o4	PF3D7_0920300	conserved Plasmodium protein, unknown function	Pf4500-4	2.40016
144-V05C	BSPZV1-144	2 wks post final dose	675000	Not Protected	PF3D7_1242700.e2_4798	PF3D7_1242700.e2	PF3D7_1242700	40S ribosomal protein S17, putative	Pf4500-4	-0.0246686
144-V05C	BSPZV1-144	2 wks post final dose	675000	Not Protected	PF3D7_1364500.1o1_7025	PF3D7_1364500.1o1	PF3D7_1364500	exosome complex exonuclease, putative	Pf4500-4	0.785482
144-V05C	BSPZV1-144	2 wks post final dose	675000	Not Protected	PF3D7_1120400.iso1.exon1.amp1_1278	PF3D7_1120400.iso1.exon1.amp1	PF3D7_1120400	alpha/beta hydrolase fold domain containing protein, putative	Pf4000-5	0.223665
144-V05C	BSPZV1-144	2 wks post final dose	675000	Not Protected	PF3D7_0210700.1o1_6705	PF3D7_0210700.1o1	PF3D7_0210700	syntaxin, Qa-SNARE family (SYN17)	Pf4500-4	0.964812
144-V05C	BSPZV1-144	2 wks post final dose	675000	Not Protected	PF3D7_1416500.e1s1_9204	PF3D7_1416500.e1s1	PF3D7_1416500	NADP-specific glutamate dehydrogenase (GDHa)	Pf4500-4	0.161103
144-V05C	BSPZV1-144	2 wks post final dose	675000	Not Protected	PF3D7_1202300.e3s1_6346	PF3D7_1202300.e3s1	PF3D7_1202300	dynein heavy chain, putative	Pf4500-4	-0.0803904
144-V05C	BSPZV1-144	2 wks post final dose	675000	Not Protected	PF3D7_1219300.iso1.exon1.amp1_4486	PF3D7_1219300.iso1.exon1.amp1	PF3D7_1219300	erythrocyte membrane protein 1, PfEMP1	Pf4000-5	0.973022
144-V05C	BSPZV1-144	2 wks post final dose	675000	Not Protected	PF3D7_0913700.1o1_5899	PF3D7_0913700.1o1	PF3D7_0913700	conserved Plasmodium protein, unknown function	Pf4500-4	0.0712054
144-V05C	BSPZV1-144	2 wks post final dose	675000	Not Protected	PF3D7_1239200.e1s1_8294	PF3D7_1239200.e1s1	PF3D7_1239200	transcription factor with AP2 domain(s) (ApiAP2)	Pf4500-4	-0.0416162
144-V05C	BSPZV1-144	2 wks post final dose	675000	Not Protected	PF3D7_1114200.iso1.exon11.amp1_1773	PF3D7_1114200.iso1.exon11.amp1	PF3D7_1114200	GTPase activator, putative	Pf4000-5	-0.113005
144-V05C	BSPZV1-144	2 wks post final dose	675000	Not Protected	PF3D7_1026300.e2s1_6250	PF3D7_1026300.e2s1	PF3D7_1026300	conserved Plasmodium protein, unknown function	Pf4500-4	-0.210055
144-V05C	BSPZV1-144	2 wks post final dose	675000	Not Protected	PF3D7_0519000.iso1.exon1.amp1_4167	PF3D7_0519000.iso1.exon1.amp1	PF3D7_0519000	conserved Plasmodium protein, unknown function	Pf4000-5	0.212943
144-V05C	BSPZV1-144	2 wks post final dose	675000	Not Protected	PF3D7_0310100.iso1.exon2.amp1_2706	PF3D7_0310100.iso1.exon2.amp1	PF3D7_0310100	calcium dependent protein kinase 3	Pf4000-5	0.152241
144-V05C	BSPZV1-144	2 wks post final dose	675000	Not Protected	PF3D7_1437900.e2s1_9220	PF3D7_1437900.e2s1	PF3D7_1437900	HSP40, subfamily A, putative	Pf4500-4	0.379504
144-V05C	BSPZV1-144	2 wks post final dose	675000	Not Protected	PF3D7_1034300.iso1.exon1.amp1_2180	PF3D7_1034300.iso1.exon1.amp1	PF3D7_1034300	conserved Plasmodium protein, unknown function	Pf4000-5	0.596466
144-V05C	BSPZV1-144	2 wks post final dose	675000	Not Protected	PF3D7_1105200.iso1.exon3.amp1_951	PF3D7_1105200.iso1.exon3.amp1	PF3D7_1105200	conserved Plasmodium protein, unknown function	Pf4000-5	0.493071
144-V05C	BSPZV1-144	2 wks post final dose	675000	Not Protected	PF3D7_0703000.iso1.exon1.amp2_seg1_2874	PF3D7_0703000.iso1.exon1.amp2_seg1	PF3D7_0703000	conserved Plasmodium protein, unknown function	Pf4000-5	0.0578242
144-V05C	BSPZV1-144	2 wks post final dose	675000	Not Protected	PF3D7_0902400.iso1.exon2.amp1_1014	PF3D7_0902400.iso1.exon2.amp1	PF3D7_0902400	serine/threonine protein kinase, FIKK family	Pf4000-5	0.295595
144-V05C	BSPZV1-144	2 wks post final dose	675000	Not Protected	PF3D7_0620500.1o1_8789	PF3D7_0620500.1o1	PF3D7_0620500	cleavage stimulation factor subunit 1-like protein, putative	Pf4500-4	-0.013739
144-V05C	BSPZV1-144	2 wks post final dose	675000	Not Protected	PF3D7_1222600.e1s2_9156	PF3D7_1222600.e1s2	PF3D7_1222600	transcription factor with AP2 domain(s) (ApiAP2)	Pf4500-4	-0.313958
144-V05C	BSPZV1-144	2 wks post final dose	675000	Not Protected	PF3D7_1022500_7096	PF3D7_1022500	PF3D7_1022500	citrate synthase, mitochondrial precursor, putative	Pf4500-4	-0.928061
144-V05C	BSPZV1-144	2 wks post final dose	675000	Not Protected	PF3D7_0930300.s2_8884	PF3D7_0930300.s2	PF3D7_0930300	merozoite surface protein 1 (MSP1)	Pf4500-4	1.16196
144-V05C	BSPZV1-144	2 wks post final dose	675000	Not Protected	PF3D7_0712800.iso1.exon1.amp1_3904	PF3D7_0712800.iso1.exon1.amp1	PF3D7_0712800	erythrocyte membrane protein 1, PfEMP1	Pf4000-5	0.586743
144-V05C	BSPZV1-144	2 wks post final dose	675000	Not Protected	PF3D7_0102500.e1s1_7783	PF3D7_0102500.e1s1	PF3D7_0102500	erythrocyte binding antigen-181 (EBA181)	Pf4500-4	-0.273355
144-V05C	BSPZV1-144	2 wks post final dose	675000	Not Protected	PF3D7_1313500.1o2_5356	PF3D7_1313500.1o2	PF3D7_1313500	conserved Plasmodium membrane protein, unknown function	Pf4500-4	-0.0156847
144-V05C	BSPZV1-144	2 wks post final dose	675000	Not Protected	PF3D7_0503600.e1s1_5436	PF3D7_0503600.e1s1	PF3D7_0503600	myosin B (MyoB)	Pf4500-4	0.825699
144-V05C	BSPZV1-144	2 wks post final dose	675000	Not Protected	PF3D7_0219700.2o2_6131	PF3D7_0219700.2o2	PF3D7_0219700	Plasmodium exported protein (PHISTc), unknown function (GEXP20)	Pf4500-4	0.688196
144-V05C	BSPZV1-144	2 wks post final dose	675000	Not Protected	PF3D7_1302500.iso1.exon2.amp1_3856	PF3D7_1302500.iso1.exon2.amp1	PF3D7_1302500	conserved Plasmodium protein, unknown function	Pf4000-5	0.156332
144-V05C	BSPZV1-144	2 wks post final dose	675000	Not Protected	PF3D7_0216400.1o1_7065	PF3D7_0216400.1o1	PF3D7_0216400	vacuolar protein-sorting protein VPS45, putative	Pf4500-4	0.546514
144-V05C	BSPZV1-144	2 wks post final dose	675000	Not Protected	PF3D7_0626600.1o1_6969	PF3D7_0626600.1o1	PF3D7_0626600	conserved Plasmodium protein, unknown function	Pf4500-4	0.402562
144-V05C	BSPZV1-144	2 wks post final dose	675000	Not Protected	PF3D7_1103500.1o2_7831	PF3D7_1103500.1o2	PF3D7_1103500	CPW-WPC family protein	Pf4500-4	0.906724
144-V05C	BSPZV1-144	2 wks post final dose	675000	Not Protected	PF3D7_0802000.e1s1_5197	PF3D7_0802000.e1s1	PF3D7_0802000	glutamate dehydrogenase, putative (GDHc)	Pf4500-4	0.651516
144-V05C	BSPZV1-144	2 wks post final dose	675000	Not Protected	PF3D7_1222400.e1s1_7998	PF3D7_1222400.e1s1	PF3D7_1222400	transcription factor with AP2 domain(s) (ApiAP2)	Pf4500-4	0.0124645
144-V05C	BSPZV1-144	2 wks post final dose	675000	Not Protected	PF3D7_1468000.e11_7975	PF3D7_1468000.e11	PF3D7_1468000	conserved Plasmodium protein, unknown function	Pf4500-4	0.127648
144-V05C	BSPZV1-144	2 wks post final dose	675000	Not Protected	PF3D7_0801000.e2s1_5460	PF3D7_0801000.e2s1	PF3D7_0801000	Plasmodium exported protein (PHISTc), unknown function	Pf4500-4	0.482204
144-V05C	BSPZV1-144	2 wks post final dose	675000	Not Protected	PF3D7_1419700.1o1_8485	PF3D7_1419700.1o1	PF3D7_1419700	conserved Plasmodium protein, unknown function	Pf4500-4	0.0432558
144-V05C	BSPZV1-144	2 wks post final dose	675000	Not Protected	PF3D7_0511300.iso1.exon1.amp2_2778	PF3D7_0511300.iso1.exon1.amp2	PF3D7_0511300	MORN repeat protein, putative	Pf4000-5	-0.0407607
144-V05C	BSPZV1-144	2 wks post final dose	675000	Not Protected	PF3D7_0201600.2o2_5580	PF3D7_0201600.2o2	PF3D7_0201600	Plasmodium exported protein (PHISTb), unknown function	Pf4500-4	0.0803422
144-V05C	BSPZV1-144	2 wks post final dose	675000	Not Protected	PF3D7_1432300.1o3_7951	PF3D7_1432300.1o3	PF3D7_1432300	conserved Plasmodium protein, unknown function	Pf4500-4	-0.0533592
144-V05C	BSPZV1-144	2 wks post final dose	675000	Not Protected	PF3D7_0300600.iso1.exon1.amp1_2659	PF3D7_0300600.iso1.exon1.amp1	PF3D7_0300600	Plasmodium exported protein, unknown function, fragment	Pf4000-5	-0.622265
144-V05C	BSPZV1-144	2 wks post final dose	675000	Not Protected	PF3D7_1339300.1o1_6993	PF3D7_1339300.1o1	PF3D7_1339300	conserved Plasmodium protein, unknown function	Pf4500-4	0.583614
144-V05C	BSPZV1-144	2 wks post final dose	675000	Not Protected	PF3D7_1404600.iso3.exon4.amp1_1485	PF3D7_1404600.iso3.exon4.amp1	PF3D7_1404600	adenylyl cyclase alpha	Pf4000-5	0.040411
144-V05C	BSPZV1-144	2 wks post final dose	675000	Not Protected	PF3D7_0806800.e1s1_8932	PF3D7_0806800.e1s1	PF3D7_0806800	vacuolar proton translocating ATPase subunit A, putative	Pf4500-4	0.646973
144-V05C	BSPZV1-144	2 wks post final dose	675000	Not Protected	PF3D7_0204200.e2s1_8573	PF3D7_0204200.e2s1	PF3D7_0204200	conserved Plasmodium protein, unknown function	Pf4500-4	0.508707
144-V05C	BSPZV1-144	2 wks post final dose	675000	Not Protected	PF3D7_1475800.2o2_5843	PF3D7_1475800.2o2	PF3D7_1475800	conserved Plasmodium protein, unknown function	Pf4500-4	0.221649
144-V05C	BSPZV1-144	2 wks post final dose	675000	Not Protected	PF3D7_1322200 (renamed)_6562	PF3D7_1322200 (renamed)	PF3D7_1322200	conserved Plasmodium protein, unknown function	Pf4500-4	0.28261
144-V05C	BSPZV1-144	2 wks post final dose	675000	Not Protected	PF3D7_1110700.e3s1_8022	PF3D7_1110700.e3s1	PF3D7_1110700	actin-like protein homolog, ALP1 homolog	Pf4500-4	-0.804517
144-V05C	BSPZV1-144	2 wks post final dose	675000	Not Protected	PF3D7_1313200.1o1_8501	PF3D7_1313200.1o1	PF3D7_1313200	methionyl-tRNA formyltransferase, putative	Pf4500-4	0.140634
144-V05C	BSPZV1-144	2 wks post final dose	675000	Not Protected	PF3D7_0623100.iso1.exon12.amp1_4383	PF3D7_0623100.iso1.exon12.amp1	PF3D7_0623100	coronin binding protein, putative	Pf4000-5	0.396507
144-V05C	BSPZV1-144	2 wks post final dose	675000	Not Protected	PF3D7_0213600.iso1.exon12.amp1_3042	PF3D7_0213600.iso1.exon12.amp1	PF3D7_0213600	conserved Plasmodium protein, unknown function	Pf4000-5	-0.0306137
144-V05C	BSPZV1-144	2 wks post final dose	675000	Not Protected	PF3D7_1040400.iso1.exon2.amp1_2156	PF3D7_1040400.iso1.exon2.amp1	PF3D7_1040400	rifin	Pf4000-5	0.321968
144-V05C	BSPZV1-144	2 wks post final dose	675000	Not Protected	PF3D7_1317000.1o1_4742	PF3D7_1317000.1o1	PF3D7_1317000	U4/U6.U5 tri-snRNP-associated protein 2, putative (USP39)	Pf4500-4	0.423678
144-V05C	BSPZV1-144	2 wks post final dose	675000	Not Protected	PF3D7_1439100.e2s2_8916	PF3D7_1439100.e2s2	PF3D7_1439100	DEAD/DEAH box helicase, putative	Pf4500-4	-0.0543588
144-V05C	BSPZV1-144	2 wks post final dose	675000	Not Protected	PF3D7_1430800.1o1_8142	PF3D7_1430800.1o1	PF3D7_1430800	conserved Plasmodium protein, unknown function	Pf4500-4	-1.27196
144-V05C	BSPZV1-144	2 wks post final dose	675000	Not Protected	PF3D7_1030100.iso1.exon4.amp1_3329	PF3D7_1030100.iso1.exon4.amp1	PF3D7_1030100	pre-mRNA-splicing factor ATP-dependent RNA helicase PRP22, putative	Pf4000-5	0.376515
144-V05C	BSPZV1-144	2 wks post final dose	675000	Not Protected	PF3D7_0816700.iso1.exon3.amp1_4095	PF3D7_0816700.iso1.exon3.amp1	PF3D7_0816700	conserved Plasmodium protein, unknown function	Pf4000-5	-0.159347
144-V05C	BSPZV1-144	2 wks post final dose	675000	Not Protected	PF3D7_1147900.1o1_7544	PF3D7_1147900.1o1	PF3D7_1147900	conserved Plasmodium protein, unknown function	Pf4500-4	0.261718
144-V05C	BSPZV1-144	2 wks post final dose	675000	Not Protected	PF3D7_0513300.e1s1_8334	PF3D7_0513300.e1s1	PF3D7_0513300	purine nucleoside phosphorylase (PNP)	Pf4500-4	0.343832
144-V05C	BSPZV1-144	2 wks post final dose	675000	Not Protected	PF3D7_0205100.iso1.exon4.amp1_2371	PF3D7_0205100.iso1.exon4.amp1	PF3D7_0205100	conserved Plasmodium protein, unknown function	Pf4000-5	0.190912
144-V05C	BSPZV1-144	2 wks post final dose	675000	Not Protected	PF3D7_0713500.1o1_7376	PF3D7_0713500.1o1	PF3D7_0713500	conserved Plasmodium protein, unknown function	Pf4500-4	-0.159276
144-V05C	BSPZV1-144	2 wks post final dose	675000	Not Protected	PF3D7_0601200.iso1.exon2.amp1_695	PF3D7_0601200.iso1.exon2.amp1	PF3D7_0601200	Pfmc-2TM Maurer's cleft two transmembrane protein	Pf4000-5	0.57669
144-V05C	BSPZV1-144	2 wks post final dose	675000	Not Protected	PF3D7_1312800.iso1.exon1.amp3_4223	PF3D7_1312800.iso1.exon1.amp3	PF3D7_1312800	conserved Plasmodium protein, unknown function	Pf4000-5	-0.151629
144-V05C	BSPZV1-144	2 wks post final dose	675000	Not Protected	PF3D7_0817700.iso1.exon15.amp1_2691	PF3D7_0817700.iso1.exon15.amp1	PF3D7_0817700	rhoptry neck protein 5	Pf4000-5	0.361029
144-V05C	BSPZV1-144	2 wks post final dose	675000	Not Protected	PF3D7_0820200.1o1_5604	PF3D7_0820200.1o1	PF3D7_0820200	phosphatidylglycerophosphate synthase (PGPS)	Pf4500-4	-0.156268
144-V05C	BSPZV1-144	2 wks post final dose	675000	Not Protected	PF3D7_1025300.1o1_5077	PF3D7_1025300.1o1	PF3D7_1025300	conserved Plasmodium protein, unknown function	Pf4500-4	0.0549828
144-V05C	BSPZV1-144	2 wks post final dose	675000	Not Protected	PF3D7_1408000.e1s1_6897	PF3D7_1408000.e1s1	PF3D7_1408000	plasmepsin II	Pf4500-4	0.415182
144-V05C	BSPZV1-144	2 wks post final dose	675000	Not Protected	PF3D7_1443400.e2_5412	PF3D7_1443400.e2	PF3D7_1443400	conserved Plasmodium protein, unknown function	Pf4500-4	0.207875
144-V05C	BSPZV1-144	2 wks post final dose	675000	Not Protected	PF3D7_1201300_8869	PF3D7_1201300	PF3D7_1201300	conserved Plasmodium protein, unknown function	Pf4500-4	0.374907
144-V05C	BSPZV1-144	2 wks post final dose	675000	Not Protected	PF3D7_0509200.iso1.exon3.amp1_911	PF3D7_0509200.iso1.exon3.amp1	PF3D7_0509200	leucine-rich repeat protein	Pf4000-5	-0.139802
144-V05C	BSPZV1-144	2 wks post final dose	675000	Not Protected	PF3D7_0111500.e1s1_6578	PF3D7_0111500.e1s1	PF3D7_0111500	UMP-CMP kinase, putative	Pf4500-4	-0.266621
144-V05C	BSPZV1-144	2 wks post final dose	675000	Not Protected	PF3D7_0416300.iso1.exon1.amp1_2284	PF3D7_0416300.iso1.exon1.amp1	PF3D7_0416300	DNA replication licensing factor, putative	Pf4000-5	0.133593
144-V05C	BSPZV1-144	2 wks post final dose	675000	Not Protected	PF3D7_1314400.iso1.exon1.amp1_2092	PF3D7_1314400.iso1.exon1.amp1	PF3D7_1314400	conserved Plasmodium protein, unknown function	Pf4000-5	0.0522978
144-V05C	BSPZV1-144	2 wks post final dose	675000	Not Protected	PF3D7_1319400 (renamed)_6913	PF3D7_1319400 (renamed)	PF3D7_1319400	conserved Plasmodium protein, unknown function	Pf4500-4	0.312848
144-V05C	BSPZV1-144	2 wks post final dose	675000	Not Protected	PF3D7_1135600.1o3_8720	PF3D7_1135600.1o3	PF3D7_1135600	conserved Plasmodium protein, unknown function	Pf4500-4	-0.662403
144-V05C	BSPZV1-144	2 wks post final dose	675000	Not Protected	PF3D7_1246300.iso1.exon10.amp1_647	PF3D7_1246300.iso1.exon10.amp1	PF3D7_1246300	conserved Plasmodium protein, unknown function	Pf4000-5	0.452558
144-V05C	BSPZV1-144	2 wks post final dose	675000	Not Protected	PF3D7_0421100.iso1.exon2.amp2_1366	PF3D7_0421100.iso1.exon2.amp2	PF3D7_0421100	erythrocyte membrane protein 1, PfEMP1	Pf4000-5	0.132148
144-V05C	BSPZV1-144	2 wks post final dose	675000	Not Protected	PF3D7_0608310.iso1.exon3.amp1_440	PF3D7_0608310.iso1.exon3.amp1	PF3D7_0608310	conserved Plasmodium protein, unknown function	Pf4000-5	1.40109
144-V05C	BSPZV1-144	2 wks post final dose	675000	Not Protected	PF3D7_0733000.iso1.exon2.amp2_1653	PF3D7_0733000.iso1.exon2.amp2	PF3D7_0733000	erythrocyte membrane protein 1, PfEMP1	Pf4000-5	0.301391
144-V05C	BSPZV1-144	2 wks post final dose	675000	Not Protected	PF3D7_1209300.e1s1_5181	PF3D7_1209300.e1s1	PF3D7_1209300	zinc finger transcription factor (KROX1)	Pf4500-4	-2
144-V05C	BSPZV1-144	2 wks post final dose	675000	Not Protected	PF3D7_1303600.iso1.exon1.amp1_2108	PF3D7_1303600.iso1.exon1.amp1	PF3D7_1303600	conserved Plasmodium protein, unknown function	Pf4000-5	-0.742321
144-V05C	BSPZV1-144	2 wks post final dose	675000	Not Protected	PF3D7_0922100.e1s1_7504	PF3D7_0922100.e1s1	PF3D7_0922100	ubiquitin-like protein, putative	Pf4500-4	-0.329604
144-V05C	BSPZV1-144	2 wks post final dose	675000	Not Protected	PF3D7_1333200.s1_5109	PF3D7_1333200.s1	PF3D7_1333200	ubiquitin-activating enzyme (UBA1)	Pf4500-4	-0.621829
144-V05C	BSPZV1-144	2 wks post final dose	675000	Not Protected	PF3D7_0305200.iso1.exon1.amp2_4239	PF3D7_0305200.iso1.exon1.amp2	PF3D7_0305200	conserved Plasmodium protein, unknown function	Pf4000-5	0.662246
144-V05C	BSPZV1-144	2 wks post final dose	675000	Not Protected	PF3D7_0724500.iso1.exon2.amp1_3265	PF3D7_0724500.iso1.exon2.amp1	PF3D7_0724500	conserved Plasmodium protein, unknown function	Pf4000-5	-1.37784
144-V05C	BSPZV1-144	2 wks post final dose	675000	Not Protected	PF3D7_0402300.iso1.exon2.amp1_4566	PF3D7_0402300.iso1.exon2.amp1	PF3D7_0402300	reticulocyte binding protein homologue 1	Pf4000-5	-0.31221
144-V05C	BSPZV1-144	2 wks post final dose	675000	Not Protected	PF3D7_0506700.1o1_6482	PF3D7_0506700.1o1	PF3D7_0506700	conserved Plasmodium protein, unknown function	Pf4500-4	-0.238174
144-V05C	BSPZV1-144	2 wks post final dose	675000	Not Protected	PF3D7_0515300.s1_8557	PF3D7_0515300.s1	PF3D7_0515300	phosphatidylinositol 3-kinase (PI3K)	Pf4500-4	-0.0621794
144-V05C	BSPZV1-144	2 wks post final dose	675000	Not Protected	PF3D7_1019100.e1s2_8549	PF3D7_1019100.e1s2	PF3D7_1019100	conserved Plasmodium protein, unknown function	Pf4500-4	0.202864
144-V05C	BSPZV1-144	2 wks post final dose	675000	Not Protected	PF3D7_1477900.3o3_5341	PF3D7_1477900.3o3	PF3D7_1477900	acyl-CoA synthetase, pseudogene (ACS1b)	Pf4500-4	2.03275
144-V05C	BSPZV1-144	2 wks post final dose	675000	Not Protected	PF3D7_0816200.1o1_6682	PF3D7_0816200.1o1	PF3D7_0816200	vacuolar protein-sorting protein VPS2, putative	Pf4500-4	0.579109
144-V05C	BSPZV1-144	2 wks post final dose	675000	Not Protected	PF3D7_0722800.1o1_5891	PF3D7_0722800.1o1	PF3D7_0722800	conserved Plasmodium protein, unknown function	Pf4500-4	2.5865
144-V05C	BSPZV1-144	2 wks post final dose	675000	Not Protected	PF3D7_1369500.1o2_7671	PF3D7_1369500.1o2	PF3D7_1369500	conserved Plasmodium protein, unknown function	Pf4500-4	-0.0412198
144-V05C	BSPZV1-144	2 wks post final dose	675000	Not Protected	PF3D7_1341500.1o1_8190	PF3D7_1341500.1o1	PF3D7_1341500	conserved Plasmodium protein, unknown function	Pf4500-4	0.474879
144-V05C	BSPZV1-144	2 wks post final dose	675000	Not Protected	PF3D7_1231400.iso1.exon3.amp2_1078	PF3D7_1231400.iso1.exon3.amp2	PF3D7_1231400	amino acid transporter, putative	Pf4000-5	0.265112
144-V05C	BSPZV1-144	2 wks post final dose	675000	Not Protected	PF3D7_1008000.s2_8597	PF3D7_1008000.s2	PF3D7_1008000	histone deacetylase, putative	Pf4500-4	0.528869
144-V05C	BSPZV1-144	2 wks post final dose	675000	Not Protected	PF3D7_1473300.iso1.exon6.amp1_3784	PF3D7_1473300.iso1.exon6.amp1	PF3D7_1473300	conserved Plasmodium protein, unknown function	Pf4000-5	-1.32728
144-V05C	BSPZV1-144	2 wks post final dose	675000	Not Protected	PF3D7_0622000.iso1.exon3.amp1_2970	PF3D7_0622000.iso1.exon3.amp1	PF3D7_0622000	conserved Plasmodium protein, unknown function	Pf4000-5	0.421556
144-V05C	BSPZV1-144	2 wks post final dose	675000	Not Protected	PF3D7_1132100.iso1.exon1.amp1_4598	PF3D7_1132100.iso1.exon1.amp1	PF3D7_1132100	conserved Plasmodium protein, unknown function	Pf4000-5	-0.32084
144-V05C	BSPZV1-144	2 wks post final dose	675000	Not Protected	PF3D7_1457600.iso1.exon1.amp1_3625	PF3D7_1457600.iso1.exon1.amp1	PF3D7_1457600	conserved Plasmodium protein, unknown function	Pf4000-5	0.235316
144-V05C	BSPZV1-144	2 wks post final dose	675000	Not Protected	PF3D7_1463300.e1s1_7192	PF3D7_1463300.e1s1	PF3D7_1463300	DNA polymerase alpha subunit, putative	Pf4500-4	0.50097
144-V05C	BSPZV1-144	2 wks post final dose	675000	Not Protected	PF3D7_1343800.iso1.exon1.amp8_1318	PF3D7_1343800.iso1.exon1.amp8	PF3D7_1343800	conserved Plasmodium protein, unknown function	Pf4000-5	0.274308
144-V05C	BSPZV1-144	2 wks post final dose	675000	Not Protected	PF3D7_0528100.e1s1_6059	PF3D7_0528100.e1s1	PF3D7_0528100	beta adaptin protein, putative	Pf4500-4	0.876097
144-V05C	BSPZV1-144	2 wks post final dose	675000	Not Protected	PF3D7_0718000.e9s4_5939	PF3D7_0718000.e9s4	PF3D7_0718000	dynein heavy chain, putative	Pf4500-4	1.41388
144-V05C	BSPZV1-144	2 wks post final dose	675000	Not Protected	PF3D7_1143400.e5s1_5708	PF3D7_1143400.e5s1	PF3D7_1143400	translation initiation factor eIF-1A, putative	Pf4500-4	0.214198
144-V05C	BSPZV1-144	2 wks post final dose	675000	Not Protected	PF3D7_1319900.s2_7400	PF3D7_1319900.s2	PF3D7_1319900	conserved Plasmodium protein, unknown function	Pf4500-4	-0.0710538
144-V05C	BSPZV1-144	2 wks post final dose	675000	Not Protected	PF3D7_0403400.3o3_6514	PF3D7_0403400.3o3	PF3D7_0403400	conserved Plasmodium protein, unknown function	Pf4500-4	0.0490381
144-V05C	BSPZV1-144	2 wks post final dose	675000	Not Protected	PF3D7_1470500.6o6_7927	PF3D7_1470500.6o6	PF3D7_1470500	phosphodiesterase delta, putative (PDEdelta)	Pf4500-4	-0.432411
144-V05C	BSPZV1-144	2 wks post final dose	675000	Not Protected	PF3D7_1228900.iso1.exon21.amp1_73	PF3D7_1228900.iso1.exon21.amp1	PF3D7_1228900	conserved Plasmodium protein, unknown function	Pf4000-5	-0.613454
144-V05C	BSPZV1-144	2 wks post final dose	675000	Not Protected	PF3D7_1322300.e1s1_4814	PF3D7_1322300.e1s1	PF3D7_1322300	translation initiation factor EIF-2B subunit related	Pf4500-4	-1.02506
144-V05C	BSPZV1-144	2 wks post final dose	675000	Not Protected	PF3D7_0609900.iso1.exon1.amp2_2850	PF3D7_0609900.iso1.exon1.amp2	PF3D7_0609900	conserved Plasmodium protein, unknown function	Pf4000-5	0.593057
144-V05C	BSPZV1-144	2 wks post final dose	675000	Not Protected	PF3D7_1228100.iso1.exon2.amp1_2994	PF3D7_1228100.iso1.exon2.amp1	PF3D7_1228100	leucine-rich repeat protein	Pf4000-5	0.223326
144-V05C	BSPZV1-144	2 wks post final dose	675000	Not Protected	PF3D7_0921900.iso1.exon1.amp1_3281	PF3D7_0921900.iso1.exon1.amp1	PF3D7_0921900	conserved Plasmodium protein, unknown function	Pf4000-5	0.21448
144-V05C	BSPZV1-144	2 wks post final dose	675000	Not Protected	PF3D7_0509000.e3s1_7448	PF3D7_0509000.e3s1	PF3D7_0509000	SNAP protein (soluble N-ethylmaleimide-sensitive factor Attachment Protein), putative	Pf4500-4	0.0533133
144-V05C	BSPZV1-144	2 wks post final dose	675000	Not Protected	PF3D7_1146800.e2_7408	PF3D7_1146800.e2	PF3D7_1146800	conserved Plasmodium protein, unknown function	Pf4500-4	-0.160997
144-V05C	BSPZV1-144	2 wks post final dose	675000	Not Protected	PF3D7_0913200_8581	PF3D7_0913200	PF3D7_0913200	elongation factor 1-beta (EF-1beta)	Pf4500-4	0.0250114
144-V05C	BSPZV1-144	2 wks post final dose	675000	Not Protected	PF3D7_1327000.iso1.exon3.amp1_2515	PF3D7_1327000.iso1.exon3.amp1	PF3D7_1327000	conserved Plasmodium protein, unknown function	Pf4000-5	0.382603
144-V05C	BSPZV1-144	2 wks post final dose	675000	Not Protected	PF3D7_1124100.iso1.exon1.amp1_1988	PF3D7_1124100.iso1.exon1.amp1	PF3D7_1124100	neutral-sphingomyelinase activation factor protein, putative	Pf4000-5	1.36034
144-V05C	BSPZV1-144	2 wks post final dose	675000	Not Protected	PF3D7_1233700.iso1.exon1.amp1_1031	PF3D7_1233700.iso1.exon1.amp1	PF3D7_1233700	homocysteine S-methyltransferase, putative	Pf4000-5	0.294627
144-V05C	BSPZV1-144	2 wks post final dose	675000	Not Protected	PF3D7_1147000.e1s3_6849	PF3D7_1147000.e1s3	PF3D7_1147000	sporozoite asparagine-rich protein (SLARP)	Pf4500-4	-0.157126
144-V05C	BSPZV1-144	2 wks post final dose	675000	Not Protected	PF3D7_1302200.1o1_6115	PF3D7_1302200.1o1	PF3D7_1302200	early transcribed membrane protein 13 (ETRAMP13)	Pf4500-4	0.0792489
144-V05C	BSPZV1-144	2 wks post final dose	675000	Not Protected	PF3D7_0109500.iso1.exon1.amp1_2683	PF3D7_0109500.iso1.exon1.amp1	PF3D7_0109500	N-acetyltransferase, putative	Pf4000-5	0.224343
144-V05C	BSPZV1-144	2 wks post final dose	675000	Not Protected	PF3D7_0709500.iso1.exon2.amp1_935	PF3D7_0709500.iso1.exon2.amp1	PF3D7_0709500	conserved Plasmodium protein, unknown function	Pf4000-5	-0.491816
144-V05C	BSPZV1-144	2 wks post final dose	675000	Not Protected	PF3D7_1449100.iso1.exon3.amp1_3050	PF3D7_1449100.iso1.exon3.amp1	PF3D7_1449100	conserved Plasmodium protein, unknown function	Pf4000-5	0.163775
144-V05C	BSPZV1-144	2 wks post final dose	675000	Not Protected	PF3D7_0311400.iso1.exon2.amp2_1071	PF3D7_0311400.iso1.exon2.amp2	PF3D7_0311400	protein kinase, putative	Pf4000-5	0.925864
144-V05C	BSPZV1-144	2 wks post final dose	675000	Not Protected	PF3D7_0704800.iso1.exon1.amp2_1629	PF3D7_0704800.iso1.exon1.amp2	PF3D7_0704800	conserved Plasmodium protein, unknown function	Pf4000-5	0.8498
144-V05C	BSPZV1-144	2 wks post final dose	675000	Not Protected	PF3D7_1125400.2o2_5277	PF3D7_1125400.2o2	PF3D7_1125400	mitochondrial inner membrane translocase subunit tim44, putative	Pf4500-4	-0.112095
144-V05C	BSPZV1-144	2 wks post final dose	675000	Not Protected	PF3D7_1029100.iso2.exon1.amp2_4271	PF3D7_1029100.iso2.exon1.amp2	PF3D7_1029100	conserved Plasmodium protein, unknown function	Pf4000-5	0.0202494
144-V05C	BSPZV1-144	2 wks post final dose	675000	Not Protected	PF3D7_0307800_4790	PF3D7_0307800	PF3D7_0307800	conserved Plasmodium protein, unknown function	Pf4500-4	-0.0114077
144-V05C	BSPZV1-144	2 wks post final dose	675000	Not Protected	PF3D7_0925400.2o2_5868	PF3D7_0925400.2o2	PF3D7_0925400	protein phosphatase-beta	Pf4500-4	0.0941203
144-V05C	BSPZV1-144	2 wks post final dose	675000	Not Protected	PF3D7_0605600.iso1.exon5.amp1_4391	PF3D7_0605600.iso1.exon5.amp1	PF3D7_0605600	nucleoside diphosphate kinase, putative	Pf4000-5	0.156865
144-V05C	BSPZV1-144	2 wks post final dose	675000	Not Protected	PF3D7_0608000.iso1.exon11.amp1_1182	PF3D7_0608000.iso1.exon11.amp1	PF3D7_0608000	conserved protein, unknown function	Pf4000-5	0.0881266
144-V05C	BSPZV1-144	2 wks post final dose	675000	Not Protected	PF3D7_0323500.iso1.exon4.amp1_97	PF3D7_0323500.iso1.exon4.amp1	PF3D7_0323500	survival of motor neuron (SMN)-like protein	Pf4000-5	-0.635429
144-V05C	BSPZV1-144	2 wks post final dose	675000	Not Protected	PF3D7_0423100.iso1.exon1.amp1_3832	PF3D7_0423100.iso1.exon1.amp1	PF3D7_0423100	clathrin assembly protein, putative	Pf4000-5	-0.0804022
144-V05C	BSPZV1-144	2 wks post final dose	675000	Not Protected	PF3D7_1414400.e2s1_6873	PF3D7_1414400.e2s1	PF3D7_1414400	serine/threonine protein phosphatase (PP1)	Pf4500-4	0.151425
144-V05C	BSPZV1-144	2 wks post final dose	675000	Not Protected	PF3D7_1333900.iso1.exon1.amp1_1605	PF3D7_1333900.iso1.exon1.amp1	PF3D7_1333900	conserved Plasmodium protein, unknown function	Pf4000-5	0.264617
144-V05C	BSPZV1-144	2 wks post final dose	675000	Not Protected	PF3D7_1228700.iso1.exon1.amp1_seg2_1438	PF3D7_1228700.iso1.exon1.amp1_seg2	PF3D7_1228700	conserved Plasmodium protein, unknown function	Pf4000-5	0.502605
144-V05C	BSPZV1-144	2 wks post final dose	675000	Not Protected	PF3D7_1128600.1o1_5317	PF3D7_1128600.1o1	PF3D7_1128600	CCR4-NOT transcription complex subunit 2, putative (NOT2)	Pf4500-4	-0.107315
144-V05C	BSPZV1-144	2 wks post final dose	675000	Not Protected	PF3D7_1149500.e2_6825	PF3D7_1149500.e2	PF3D7_1149500	ring-infected erythrocyte surface antigen 2, pseudogene (RESA2)	Pf4500-4	0.687956
144-V05C	BSPZV1-144	2 wks post final dose	675000	Not Protected	PF3D7_0732300.iso1.exon1.amp1_4175	PF3D7_0732300.iso1.exon1.amp1	PF3D7_0732300	rifin	Pf4000-5	0.599343
144-V05C	BSPZV1-144	2 wks post final dose	675000	Not Protected	PF3D7_0404800.1o2_6179	PF3D7_0404800.1o2	PF3D7_0404800	conserved Plasmodium protein, unknown function	Pf4500-4	0.629899
144-V05C	BSPZV1-144	2 wks post final dose	675000	Not Protected	PF3D7_0201700.2o2_8813	PF3D7_0201700.2o2	PF3D7_0201700	DnaJ protein, putative	Pf4500-4	0.137311
144-V05C	BSPZV1-144	2 wks post final dose	675000	Not Protected	PF3D7_0929400.e2s1_6586	PF3D7_0929400.e2s1	PF3D7_0929400	high molecular weight rhoptry protein 2 (RhopH2)	Pf4500-4	0.236928
144-V05C	BSPZV1-144	2 wks post final dose	675000	Not Protected	PF3D7_0723800.iso1.exon1.amp2_1941	PF3D7_0723800.iso1.exon1.amp2	PF3D7_0723800	conserved Plasmodium protein, unknown function	Pf4000-5	0.336623
144-V05C	BSPZV1-144	2 wks post final dose	675000	Not Protected	PF3D7_0808100.iso1.exon1.amp1_3808	PF3D7_0808100.iso1.exon1.amp1	PF3D7_0808100	conserved Plasmodium protein, unknown function	Pf4000-5	-0.125909
144-V05C	BSPZV1-144	2 wks post final dose	675000	Not Protected	PF3D7_1309100.e3s1_7121	PF3D7_1309100.e3s1	PF3D7_1309100	60S ribosomal protein L24, putative	Pf4500-4	0.00327044
144-V05C	BSPZV1-144	2 wks post final dose	675000	Not Protected	PF3D7_1113300.1o1_8741	PF3D7_1113300.1o1	PF3D7_1113300	UDP-galactose transporter, putative	Pf4500-4	0.0139912
144-V05C	BSPZV1-144	2 wks post final dose	675000	Not Protected	PF3D7_0935800.e9_9148	PF3D7_0935800.e9	PF3D7_0935800	cytoadherence linked asexual protein 9 (CLAG9)	Pf4500-4	1.32835
144-V05C	BSPZV1-144	2 wks post final dose	675000	Not Protected	PF3D7_1117800.iso1.exon1.amp1_264	PF3D7_1117800.iso1.exon1.amp1	PF3D7_1117800	DNA mismatch repair protein MLH	Pf4000-5	0.456026
144-V05C	BSPZV1-144	2 wks post final dose	675000	Not Protected	PF3D7_1200200.iso1.exon1.amp1_2148	PF3D7_1200200.iso1.exon1.amp1	PF3D7_1200200	rifin	Pf4000-5	0.459054
144-V05C	BSPZV1-144	2 wks post final dose	675000	Not Protected	PFC10_API0014.iso1.exon1.amp1_short_1174	PFC10_API0014.iso1.exon1.amp1_short	PFC10_API0014	hypothetical protein (ORF101)	Pf4000-5	-0.25912
144-V05C	BSPZV1-144	2 wks post final dose	675000	Not Protected	PF3D7_1011600.1o1_7344	PF3D7_1011600.1o1	PF3D7_1011600	conserved Plasmodium protein, unknown function	Pf4500-4	-0.0125729
144-V05C	BSPZV1-144	2 wks post final dose	675000	Not Protected	PF3D7_1470800.iso1.exon2.amp1_3976	PF3D7_1470800.iso1.exon2.amp1	PF3D7_1470800	conserved Plasmodium protein, unknown function	Pf4000-5	0.342568
144-V05C	BSPZV1-144	2 wks post final dose	675000	Not Protected	PF3D7_1142400.iso1.exon1.amp1_1302	PF3D7_1142400.iso1.exon1.amp1	PF3D7_1142400	coproporphyrinogen III oxidase	Pf4000-5	-0.163554
144-V05C	BSPZV1-144	2 wks post final dose	675000	Not Protected	PF3D7_0113900.2o2_5532	PF3D7_0113900.2o2	PF3D7_0113900	Plasmodium exported protein (hyp8), unknown function (GEXP10)	Pf4500-4	0.314552
144-V05C	BSPZV1-144	2 wks post final dose	675000	Not Protected	PF3D7_0407100.2o2_5556	PF3D7_0407100.2o2	PF3D7_0407100	conserved Plasmodium protein, unknown function	Pf4500-4	0.0919535
144-V05C	BSPZV1-144	2 wks post final dose	675000	Not Protected	PF3D7_1352100.iso1.exon1.amp2_3090	PF3D7_1352100.iso1.exon1.amp2	PF3D7_1352100	ABC transporter, (heavy metal transporter family), putative	Pf4000-5	0.489691
144-V05C	BSPZV1-144	2 wks post final dose	675000	Not Protected	PF3D7_0809900.iso1.exon1.amp2_seg2_576	PF3D7_0809900.iso1.exon1.amp2_seg2	PF3D7_0809900	JmjC domain containing protein	Pf4000-5	1.19247
144-V05C	BSPZV1-144	2 wks post final dose	675000	Not Protected	PF3D7_1239600.1o1_9028	PF3D7_1239600.1o1	PF3D7_1239600	hydroxyethylthiazole kinase, putative	Pf4500-4	0.230705
144-V05C	BSPZV1-144	2 wks post final dose	675000	Not Protected	PF3D7_1352700.iso1.exon1.amp3_2204	PF3D7_1352700.iso1.exon1.amp3	PF3D7_1352700	P-loop containing nucleoside triphosphate hydrolase, putative	Pf4000-5	0.326554
144-V05C	BSPZV1-144	2 wks post final dose	675000	Not Protected	PF3D7_0718600.iso1.exon6.amp1_3617	PF3D7_0718600.iso1.exon6.amp1	PF3D7_0718600	conserved Plasmodium protein, unknown function	Pf4000-5	0.673834
144-V05C	BSPZV1-144	2 wks post final dose	675000	Not Protected	PF3D7_1221700.e2_6538	PF3D7_1221700.e2	PF3D7_1221700	conserved protein, unknown function	Pf4500-4	-0.0119902
144-V05C	BSPZV1-144	2 wks post final dose	675000	Not Protected	PF3D7_1459900.1o1_4958	PF3D7_1459900.1o1	PF3D7_1459900	conserved Plasmodium membrane protein, unknown function	Pf4500-4	0.00825783
144-V05C	BSPZV1-144	2 wks post final dose	675000	Not Protected	PF3D7_1235800.iso1.exon1.amp1_short_4311	PF3D7_1235800.iso1.exon1.amp1_short	PF3D7_1235800	conserved Plasmodium protein, unknown function	Pf4000-5	0.297852
144-V05C	BSPZV1-144	2 wks post final dose	675000	Not Protected	PF3D7_0611800.iso1.exon5.amp2_seg2_1733	PF3D7_0611800.iso1.exon5.amp2_seg2	PF3D7_0611800	conserved Plasmodium protein, unknown function	Pf4000-5	0.383665
144-V05C	BSPZV1-144	2 wks post final dose	675000	Not Protected	PF3D7_0425400.2o2_4670	PF3D7_0425400.2o2	PF3D7_0425400	Plasmodium exported protein (PHISTa), unknown function	Pf4500-4	0.274353
144-V05C	BSPZV1-144	2 wks post final dose	675000	Not Protected	PF3D7_1456500.s1_5700	PF3D7_1456500.s1	PF3D7_1456500	conserved Plasmodium protein, unknown function	Pf4500-4	-0.200729
144-V05C	BSPZV1-144	2 wks post final dose	675000	Not Protected	PF3D7_1104000.1o3_6466	PF3D7_1104000.1o3	PF3D7_1104000	phenylalanyl-tRNA synthetase beta chain, putative	Pf4500-4	0.0559094
144-V05C	BSPZV1-144	2 wks post final dose	675000	Not Protected	PF3D7_0706000.iso1.exon1.amp1_3425	PF3D7_0706000.iso1.exon1.amp1	PF3D7_0706000	conserved Plasmodium protein, unknown function	Pf4000-5	-0.226324
144-V05C	BSPZV1-144	2 wks post final dose	675000	Not Protected	PF3D7_1202300.e33s1_5173	PF3D7_1202300.e33s1	PF3D7_1202300	dynein heavy chain, putative	Pf4500-4	0.646235
144-V05C	BSPZV1-144	2 wks post final dose	675000	Not Protected	PF3D7_1342100.e1s1_8007	PF3D7_1342100.e1s1	PF3D7_1342100	aconitase	Pf4500-4	0.148301
144-V05C	BSPZV1-144	2 wks post final dose	675000	Not Protected	PF3D7_0914200.1o4_9052	PF3D7_0914200.1o4	PF3D7_0914200	phospholipid or glycerol acyltransferase, putative	Pf4500-4	-0.317313
144-V05C	BSPZV1-144	2 wks post final dose	675000	Not Protected	PF3D7_1205900.e1s2_4886	PF3D7_1205900.e1s2	PF3D7_1205900	conserved protein, unknown function	Pf4500-4	0.155062
144-V05C	BSPZV1-144	2 wks post final dose	675000	Not Protected	PF3D7_0202600.iso2.exon3.amp1_624	PF3D7_0202600.iso2.exon3.amp1	PF3D7_0202600	conserved Plasmodium protein, unknown function	Pf4000-5	-0.464241
144-V05C	BSPZV1-144	2 wks post final dose	675000	Not Protected	PF3D7_1252100.e7s1_6035	PF3D7_1252100.e7s1	PF3D7_1252100	rhoptry neck protein 3 (RON3)	Pf4500-4	0.271005
144-V05C	BSPZV1-144	2 wks post final dose	675000	Not Protected	PF3D7_1410300.iso1.exon1.amp1_4407	PF3D7_1410300.iso1.exon1.amp1	PF3D7_1410300	conserved Plasmodium protein, unknown function	Pf4000-5	0.207638
144-V05C	BSPZV1-144	2 wks post final dose	675000	Not Protected	PF3D7_1413100.iso1.exon4.amp1_153	PF3D7_1413100.iso1.exon4.amp1	PF3D7_1413100	conserved Plasmodium protein, unknown function	Pf4000-5	-0.00138649
144-V05C	BSPZV1-144	2 wks post final dose	675000	Not Protected	PF3D7_0827800.e1s3_6929	PF3D7_0827800.e1s3	PF3D7_0827800	SET domain protein, putative (SET3)	Pf4500-4	0.142206
144-V05C	BSPZV1-144	2 wks post final dose	675000	Not Protected	PF3D7_0504200.2o3_7328	PF3D7_0504200.2o3	PF3D7_0504200	ATP-dependent helicase, putative	Pf4500-4	-0.00791778
144-V05C	BSPZV1-144	2 wks post final dose	675000	Not Protected	PF3D7_1149000.e1s1_5748	PF3D7_1149000.e1s1	PF3D7_1149000	antigen 332, DBL-like protein (Pf332)	Pf4500-4	0.235293
144-V05C	BSPZV1-144	2 wks post final dose	675000	Not Protected	PF3D7_0822400.3o4_6155	PF3D7_0822400.3o4	PF3D7_0822400	conserved Plasmodium protein, unknown function	Pf4500-4	-0.0133502
144-V05C	BSPZV1-144	2 wks post final dose	675000	Not Protected	PF3D7_0202400.e1s1_5756	PF3D7_0202400.e1s1	PF3D7_0202400	conserved Plasmodium protein, unknown function	Pf4500-4	0.0117006
144-V05C	BSPZV1-144	2 wks post final dose	675000	Not Protected	PF3D7_1040200.iso1.exon2.amp1_408	PF3D7_1040200.iso1.exon2.amp1	PF3D7_1040200	stevor	Pf4000-5	0.610797
144-V05C	BSPZV1-144	2 wks post final dose	675000	Not Protected	PF3D7_1136300.e2s1_5389	PF3D7_1136300.e2s1	PF3D7_1136300	tudor staphylococcal nuclease (TSN)	Pf4500-4	1.03698
144-V05C	BSPZV1-144	2 wks post final dose	675000	Not Protected	PF3D7_1340000.1o1_7616	PF3D7_1340000.1o1	PF3D7_1340000	secreted ookinete protein, putative (PSOP7)	Pf4500-4	-0.073281
144-V05C	BSPZV1-144	2 wks post final dose	675000	Not Protected	PF3D7_0317200.iso1.exon1.amp2_3936	PF3D7_0317200.iso1.exon1.amp2	PF3D7_0317200	cdc2-related protein kinase 4	Pf4000-5	0.397559
144-V05C	BSPZV1-144	2 wks post final dose	675000	Not Protected	PF3D7_0421300.iso1.exon2.amp1_2811	PF3D7_0421300.iso1.exon2.amp1	PF3D7_0421300	erythrocyte membrane protein 1, PfEMP1	Pf4000-5	-0.0656159
144-V05C	BSPZV1-144	2 wks post final dose	675000	Not Protected	PF3D7_0933700.iso1.exon2.amp1_1829	PF3D7_0933700.iso1.exon2.amp1	PF3D7_0933700	conserved Plasmodium protein, unknown function	Pf4000-5	0.040796
144-V05C	BSPZV1-144	2 wks post final dose	675000	Not Protected	PF3D7_0516300.1o1_7057	PF3D7_0516300.1o1	PF3D7_0516300	tRNA pseudouridine synthase, putative	Pf4500-4	-0.164878
144-V05C	BSPZV1-144	2 wks post final dose	675000	Not Protected	PF3D7_0529400.1.e6s1_8310	PF3D7_0529400.1.e6s1	PF3D7_0529400.1	conserved Plasmodium protein, unknown function	Pf4500-4	0.278646
144-V05C	BSPZV1-144	2 wks post final dose	675000	Not Protected	PF3D7_1460200.iso1.exon1.amp1_2723	PF3D7_1460200.iso1.exon1.amp1	PF3D7_1460200	conserved Plasmodium protein, unknown function	Pf4000-5	0.0799082
144-V05C	BSPZV1-144	2 wks post final dose	675000	Not Protected	PF3D7_0503800.iso1.exon2.amp1_2923	PF3D7_0503800.iso1.exon2.amp1	PF3D7_0503800	60S ribosomal protein L31, putative	Pf4000-5	0.222986
144-V05C	BSPZV1-144	2 wks post final dose	675000	Not Protected	PF3D7_0413700.1o1_5844	PF3D7_0413700.1o1	PF3D7_0413700	lysine decarboxylase-like protein, putative	Pf4500-4	0.178225
144-V05C	BSPZV1-144	2 wks post final dose	675000	Not Protected	PF3D7_0418200_7137	PF3D7_0418200	PF3D7_0418200	golgi organization and biogenesis factor, putative	Pf4500-4	0.0395129
144-V05C	BSPZV1-144	2 wks post final dose	675000	Not Protected	PF3D7_1117900.iso1.exon1.amp2_217	PF3D7_1117900.iso1.exon1.amp2	PF3D7_1117900	conserved Plasmodium protein, unknown function	Pf4000-5	1.00928
144-V05C	BSPZV1-144	2 wks post final dose	675000	Not Protected	PF3D7_0302500.e1s1_7185	PF3D7_0302500.e1s1	PF3D7_0302500	cytoadherence linked asexual protein 3.1 (CLAG3.1)	Pf4500-4	1.65188
144-V05C	BSPZV1-144	2 wks post final dose	675000	Not Protected	PF3D7_1203700.e3_8270	PF3D7_1203700.e3	PF3D7_1203700	nucleosome assembly protein (NAPL)	Pf4500-4	0.409828
144-V05C	BSPZV1-144	2 wks post final dose	675000	Not Protected	PF3D7_1119400.iso1.exon1.amp2_seg1_1430	PF3D7_1119400.iso1.exon1.amp2_seg1	PF3D7_1119400	ubiquitin-protein ligase, putative	Pf4000-5	0.1147
144-V05C	BSPZV1-144	2 wks post final dose	675000	Not Protected	PF3D7_1136700.iso1.exon2.amp1_1222	PF3D7_1136700.iso1.exon2.amp1	PF3D7_1136700	conserved Plasmodium protein, unknown function	Pf4000-5	0.152063
144-V05C	BSPZV1-144	2 wks post final dose	675000	Not Protected	PF3D7_0817700.iso1.exon18.amp1_4394	PF3D7_0817700.iso1.exon18.amp1	PF3D7_0817700	rhoptry neck protein 5	Pf4000-5	-0.701826
144-V05C	BSPZV1-144	2 wks post final dose	675000	Not Protected	PF3D7_1476200.2o2_8406	PF3D7_1476200.2o2	PF3D7_1476200	Plasmodium exported protein (PHISTb), unknown function	Pf4500-4	-0.149416
144-V05C	BSPZV1-144	2 wks post final dose	675000	Not Protected	PF3D7_0702100.2o3_6754	PF3D7_0702100.2o3	PF3D7_0702100	Plasmodium exported protein (PHISTb), unknown function, pseudogene	Pf4500-4	-0.241358
144-V05C	BSPZV1-144	2 wks post final dose	675000	Not Protected	PF3D7_0820600.3o3_6147	PF3D7_0820600.3o3	PF3D7_0820600	conserved Plasmodium membrane protein, unknown function	Pf4500-4	0.231197
144-V05C	BSPZV1-144	2 wks post final dose	675000	Not Protected	PF3D7_1419400.e1s2_6347	PF3D7_1419400.e1s2	PF3D7_1419400	conserved Plasmodium membrane protein, unknown function	Pf4500-4	0.339424
144-V05C	BSPZV1-144	2 wks post final dose	675000	Not Protected	PF3D7_0832700.iso1.exon2.amp1_2380	PF3D7_0832700.iso1.exon2.amp1	PF3D7_0832700	Plasmodium exported protein (PHISTa-like), unknown function	Pf4000-5	0.186917
144-V05C	BSPZV1-144	2 wks post final dose	675000	Not Protected	PF3D7_1137200.iso1.exon1.amp1_432	PF3D7_1137200.iso1.exon1.amp1	PF3D7_1137200	conserved Plasmodium protein, unknown function	Pf4000-5	0.207981
144-V05C	BSPZV1-144	2 wks post final dose	675000	Not Protected	PF3D7_0215200_8286	PF3D7_0215200	PF3D7_0215200	conserved Plasmodium protein, unknown function	Pf4500-4	-0.913115
144-V05C	BSPZV1-144	2 wks post final dose	675000	Not Protected	PF3D7_0514200.1o1_6490	PF3D7_0514200.1o1	PF3D7_0514200	conserved Plasmodium protein, unknown function	Pf4500-4	-0.0978033
144-V05C	BSPZV1-144	2 wks post final dose	675000	Not Protected	PF3D7_1337400.iso1.exon2.amp1_3529	PF3D7_1337400.iso1.exon2.amp1	PF3D7_1337400	conserved Plasmodium protein, unknown function	Pf4000-5	0.415334
144-V05C	BSPZV1-144	2 wks post final dose	675000	Not Protected	PF3D7_1334600.1o1_8454	PF3D7_1334600.1o1	PF3D7_1334600	MSP7-like protein (MSRP3)	Pf4500-4	-0.510644
144-V05C	BSPZV1-144	2 wks post final dose	675000	Not Protected	PF3D7_0509800.2o4_8246	PF3D7_0509800.2o4	PF3D7_0509800	phosphatidylinositol 4-kinase	Pf4500-4	0.152812
144-V05C	BSPZV1-144	2 wks post final dose	675000	Not Protected	PF3D7_0304100.1o1_7041	PF3D7_0304100.1o1	PF3D7_0304100	membrane skeletal protein IMC1-related (ALV2)	Pf4500-4	0.339272
144-V05C	BSPZV1-144	2 wks post final dose	675000	Not Protected	PF3D7_1412800.iso1.exon1.amp1_1869	PF3D7_1412800.iso1.exon1.amp1	PF3D7_1412800	N-myristoyltransferase	Pf4000-5	0.348333
144-V05C	BSPZV1-144	2 wks post final dose	675000	Not Protected	PF3D7_1416200.iso1.exon1.amp3_seg1_4024	PF3D7_1416200.iso1.exon1.amp3_seg1	PF3D7_1416200	metacaspase-like protein	Pf4000-5	0.509019
144-V05C	BSPZV1-144	2 wks post final dose	675000	Not Protected	PF3D7_1346400.e1s1_6858	PF3D7_1346400.e1s1	PF3D7_1346400	conserved Plasmodium protein, unknown function	Pf4500-4	0.0810707
144-V05C	BSPZV1-144	2 wks post final dose	675000	Not Protected	PF3D7_1348700.iso1.exon4.amp1_680	PF3D7_1348700.iso1.exon4.amp1	PF3D7_1348700	conserved Plasmodium protein, unknown function	Pf4000-5	0.531109
144-V05C	BSPZV1-144	2 wks post final dose	675000	Not Protected	PF3D7_0614400.1o1_8430	PF3D7_0614400.1o1	PF3D7_0614400	conserved Plasmodium protein, unknown function	Pf4500-4	0.383643
144-V05C	BSPZV1-144	2 wks post final dose	675000	Not Protected	PF3D7_1354200_8837	PF3D7_1354200	PF3D7_1354200	inositol-polyphosphate 5-phosphatase, putative	Pf4500-4	0.270207
144-V05C	BSPZV1-144	2 wks post final dose	675000	Not Protected	PF3D7_0527200.e2s1_8350	PF3D7_0527200.e2s1	PF3D7_0527200	ubiquitin carboxyl-terminal hydrolase, putative	Pf4500-4	0.962738
144-V05C	BSPZV1-144	2 wks post final dose	675000	Not Protected	PF3D7_1348600.iso1.exon4.amp1_3880	PF3D7_1348600.iso1.exon4.amp1	PF3D7_1348600	conserved Plasmodium protein, unknown function	Pf4000-5	-0.0362872
144-V05C	BSPZV1-144	2 wks post final dose	675000	Not Protected	PF3D7_0214800.iso1.exon1.amp1_2947	PF3D7_0214800.iso1.exon1.amp1	PF3D7_0214800	conserved Plasmodium membrane protein, unknown function	Pf4000-5	0.248875
144-V05C	BSPZV1-144	2 wks post final dose	675000	Not Protected	PF3D7_0216800.iso1.exon1.amp2_3378	PF3D7_0216800.iso1.exon1.amp2	PF3D7_0216800	conserved Plasmodium membrane protein, unknown function	Pf4000-5	-0.0113293
144-V05C	BSPZV1-144	2 wks post final dose	675000	Not Protected	PF3D7_0523800.1o1_7352	PF3D7_0523800.1o1	PF3D7_0523800	transporter, putative	Pf4500-4	-0.12737
144-V05C	BSPZV1-144	2 wks post final dose	675000	Not Protected	PF3D7_0400300.iso1.exon1.amp1_2731	PF3D7_0400300.iso1.exon1.amp1	PF3D7_0400300	rifin	Pf4000-5	0.468671
144-V05C	BSPZV1-144	2 wks post final dose	675000	Not Protected	PF3D7_1322500.3o6_5605	PF3D7_1322500.3o6	PF3D7_1322500	DHHC-type zinc finger protein, putative	Pf4500-4	-0.132428
144-V05C	BSPZV1-144	2 wks post final dose	675000	Not Protected	PF3D7_0422500.e1s3_5652	PF3D7_0422500.e1s3	PF3D7_0422500	pre-mRNA-splicing helicase BRR2, putative (BRR2)	Pf4500-4	0.593348
144-V05C	BSPZV1-144	2 wks post final dose	675000	Not Protected	PF3D7_0420900.iso1.exon2.amp1_504	PF3D7_0420900.iso1.exon2.amp1	PF3D7_0420900	erythrocyte membrane protein 1, PfEMP1	Pf4000-5	0.256519
144-V05C	BSPZV1-144	2 wks post final dose	675000	Not Protected	PF3D7_0819100.iso1.exon1.amp1_1270	PF3D7_0819100.iso1.exon1.amp1	PF3D7_0819100	BRIX domain, putative	Pf4000-5	0.145455
144-V05C	BSPZV1-144	2 wks post final dose	675000	Not Protected	PF3D7_1138400.e1s1_4822	PF3D7_1138400.e1s1	PF3D7_1138400	guanylyl cyclase (GCalpha)	Pf4500-4	-0.154337
144-V05C	BSPZV1-144	2 wks post final dose	675000	Not Protected	PF3D7_1111800.iso1.exon1.amp1_2132	PF3D7_1111800.iso1.exon1.amp1	PF3D7_1111800	peptidyl-prolyl cis-trans isomerase, putative	Pf4000-5	-0.831814
144-V05C	BSPZV1-144	2 wks post final dose	675000	Not Protected	PF3D7_1325600.2o2_8119	PF3D7_1325600.2o2	PF3D7_1325600	conserved Plasmodium protein, unknown function	Pf4500-4	-0.359437
144-V05C	BSPZV1-144	2 wks post final dose	675000	Not Protected	PF3D7_1401100.e2s1_8047	PF3D7_1401100.e2s1	PF3D7_1401100	DnaJ protein, putative	Pf4500-4	0.579238
144-V05C	BSPZV1-144	2 wks post final dose	675000	Not Protected	PF3D7_1408200.iso1.exon1.amp2_2779	PF3D7_1408200.iso1.exon1.amp2	PF3D7_1408200	transcription factor with AP2 domain(s)	Pf4000-5	-0.107448
144-V05C	BSPZV1-144	2 wks post final dose	675000	Not Protected	PF3D7_0421300.iso1.exon1.amp1_2739	PF3D7_0421300.iso1.exon1.amp1	PF3D7_0421300	erythrocyte membrane protein 1, PfEMP1	Pf4000-5	0.357325
144-V05C	BSPZV1-144	2 wks post final dose	675000	Not Protected	PF3D7_1416000.iso1.exon1.amp1_361	PF3D7_1416000.iso1.exon1.amp1	PF3D7_1416000	conserved Plasmodium protein, unknown function	Pf4000-5	0.234643
144-V05C	BSPZV1-144	2 wks post final dose	675000	Not Protected	PF3D7_0927800.1o2_5541	PF3D7_0927800.1o2	PF3D7_0927800	cytochrome c oxidase subunit, putative	Pf4500-4	-1.1409
144-V05C	BSPZV1-144	2 wks post final dose	675000	Not Protected	PF3D7_0523700.iso1.exon2.amp1_632	PF3D7_0523700.iso1.exon2.amp1	PF3D7_0523700	conserved Plasmodium membrane protein, unknown function	Pf4000-5	-0.251322
144-V05C	BSPZV1-144	2 wks post final dose	675000	Not Protected	PF3D7_0628800.1o1_7640	PF3D7_0628800.1o1	PF3D7_0628800	glutamyl-tRNA(Gln) amidotransferase subunit B, putative	Pf4500-4	-0.0820203
144-V05C	BSPZV1-144	2 wks post final dose	675000	Not Protected	PF3D7_1339600.e1s1_9223	PF3D7_1339600.e1s1	PF3D7_1339600	conserved Plasmodium protein, unknown function	Pf4500-4	0.167805
144-V05C	BSPZV1-144	2 wks post final dose	675000	Not Protected	PF3D7_0400400.iso1.exon1.amp1_1294	PF3D7_0400400.iso1.exon1.amp1	PF3D7_0400400	erythrocyte membrane protein 1, PfEMP1	Pf4000-5	2.78323
144-V05C	BSPZV1-144	2 wks post final dose	675000	Not Protected	PF3D7_1457900.e1s2_5126	PF3D7_1457900.e1s2	PF3D7_1457900	conserved Plasmodium protein, unknown function	Pf4500-4	0.141507
144-V05C	BSPZV1-144	2 wks post final dose	675000	Not Protected	PFC10_API0040.iso1.exon1.amp1_887	PFC10_API0040.iso1.exon1.amp1	PFC10_API0040	apicoplast ribosomal protein S19 (rps19)	Pf4000-5	0.248376
144-V05C	BSPZV1-144	2 wks post final dose	675000	Not Protected	PF3D7_0623900.1o1_5269	PF3D7_0623900.1o1	PF3D7_0623900	ribonuclease HII, putative	Pf4500-4	2.2612
144-V05C	BSPZV1-144	2 wks post final dose	675000	Not Protected	PF3D7_1453200.iso1.exon5.amp1_1821	PF3D7_1453200.iso1.exon5.amp1	PF3D7_1453200	conserved Plasmodium protein, unknown function	Pf4000-5	0.217037
144-V05C	BSPZV1-144	2 wks post final dose	675000	Not Protected	PF3D7_0529800.1o2_6802	PF3D7_0529800.1o2	PF3D7_0529800	conserved Plasmodium protein, unknown function	Pf4500-4	0.029547
144-V05C	BSPZV1-144	2 wks post final dose	675000	Not Protected	PF3D7_1037200.10o12_7895	PF3D7_1037200.10o12	PF3D7_1037200	conserved Plasmodium protein, unknown function	Pf4500-4	0.333017
144-V05C	BSPZV1-144	2 wks post final dose	675000	Not Protected	PF3D7_0704400.iso1.exon1.amp2_3952	PF3D7_0704400.iso1.exon1.amp2	PF3D7_0704400	phosphoinositide-binding protein, putative	Pf4000-5	0.0979642
144-V05C	BSPZV1-144	2 wks post final dose	675000	Not Protected	PF3D7_1146200.1o2_7257	PF3D7_1146200.1o2	PF3D7_1146200	conserved Plasmodium protein, unknown function	Pf4500-4	-0.241814
144-V05C	BSPZV1-144	2 wks post final dose	675000	Not Protected	PF3D7_0604000.iso1.exon1.amp3_760	PF3D7_0604000.iso1.exon1.amp3	PF3D7_0604000	conserved Plasmodium protein, unknown function	Pf4000-5	0.549352
144-V05C	BSPZV1-144	2 wks post final dose	675000	Not Protected	PF3D7_0322000.e1s1_4862	PF3D7_0322000.e1s1	PF3D7_0322000	peptidyl-prolyl cis-trans isomerase (CYP19A)	Pf4500-4	0.455487
144-V05C	BSPZV1-144	2 wks post final dose	675000	Not Protected	PF3D7_1300900.iso1.exon1.amp1_4455	PF3D7_1300900.iso1.exon1.amp1	PF3D7_1300900	stevor	Pf4000-5	0.673586
144-V05C	BSPZV1-144	2 wks post final dose	675000	Not Protected	PF3D7_1220300.iso1.exon2.amp2_2228	PF3D7_1220300.iso1.exon2.amp2	PF3D7_1220300	Cell cycle associated protein, putative	Pf4000-5	-0.0460655
144-V05C	BSPZV1-144	2 wks post final dose	675000	Not Protected	PF3D7_0509700.e6s1_9196	PF3D7_0509700.e6s1	PF3D7_0509700	conserved Plasmodium protein, unknown function	Pf4500-4	-0.116055
144-V05C	BSPZV1-144	2 wks post final dose	675000	Not Protected	PF3D7_1200400.iso1.exon2.amp1_720	PF3D7_1200400.iso1.exon2.amp1	PF3D7_1200400	erythrocyte membrane protein 1, PfEMP1	Pf4000-5	0.503443
144-V05C	BSPZV1-144	2 wks post final dose	675000	Not Protected	PF3D7_0600200.iso1.exon1.amp2_seg2_4623	PF3D7_0600200.iso1.exon1.amp2_seg2	PF3D7_0600200	erythrocyte membrane protein 1, PfEMP1	Pf4000-5	0.147601
144-V05C	BSPZV1-144	2 wks post final dose	675000	Not Protected	PF3D7_0607700.iso1.exon1.amp1_1390	PF3D7_0607700.iso1.exon1.amp1	PF3D7_0607700	conserved Plasmodium protein, unknown function	Pf4000-5	0.467526
144-V05C	BSPZV1-144	2 wks post final dose	675000	Not Protected	PF3D7_0514000.iso1.exon2.amp1_129	PF3D7_0514000.iso1.exon2.amp1	PF3D7_0514000	tubulin-tyrosine ligase, putative	Pf4000-5	2.31645
144-V05C	BSPZV1-144	2 wks post final dose	675000	Not Protected	PF3D7_0709000.e3s1_5972	PF3D7_0709000.e3s1	PF3D7_0709000	chloroquine resistance transporter (CRT)	Pf4500-4	0.217349
144-V05C	BSPZV1-144	2 wks post final dose	675000	Not Protected	PF3D7_0911500.iso1.exon2.amp1_3537	PF3D7_0911500.iso1.exon2.amp1	PF3D7_0911500	conserved Plasmodium protein, unknown function	Pf4000-5	-1.11472
144-V05C	BSPZV1-144	2 wks post final dose	675000	Not Protected	PF3D7_1245900.1o1_7855	PF3D7_1245900.1o1	PF3D7_1245900	conserved Plasmodium protein, unknown function	Pf4500-4	0.158862
144-V05C	BSPZV1-144	2 wks post final dose	675000	Not Protected	PF3D7_1331600.iso1.exon4.amp1_1797	PF3D7_1331600.iso1.exon4.amp1	PF3D7_1331600	protein tyrosine phosphatase, putative	Pf4000-5	0.0557305
144-V05C	BSPZV1-144	2 wks post final dose	675000	Not Protected	PF3D7_1474400.iso1.exon5.amp1_2085	PF3D7_1474400.iso1.exon5.amp1	PF3D7_1474400	conserved Plasmodium protein, unknown function	Pf4000-5	-1.58794
144-V05C	BSPZV1-144	2 wks post final dose	675000	Not Protected	PF3D7_0105400.iso2.exon2.amp1_49	PF3D7_0105400.iso2.exon2.amp1	PF3D7_0105400	conserved Plasmodium protein, unknown function	Pf4000-5	-0.0654087
144-V05C	BSPZV1-144	2 wks post final dose	675000	Not Protected	PF3D7_0517100.1o1_8765	PF3D7_0517100.1o1	PF3D7_0517100	conserved Plasmodium protein, unknown function	Pf4500-4	0.303359
144-V05C	BSPZV1-144	2 wks post final dose	675000	Not Protected	PF3D7_1118700.iso1.exon6.amp1_385	PF3D7_1118700.iso1.exon6.amp1	PF3D7_1118700	conserved Plasmodium protein, unknown function	Pf4000-5	0.171706
144-V05C	BSPZV1-144	2 wks post final dose	675000	Not Protected	PF3D7_1222400.e1s2_7999	PF3D7_1222400.e1s2	PF3D7_1222400	transcription factor with AP2 domain(s) (ApiAP2)	Pf4500-4	0.0046149
144-V05C	BSPZV1-144	2 wks post final dose	675000	Not Protected	PF3D7_0708500.iso1.exon1.amp1_1606	PF3D7_0708500.iso1.exon1.amp1	PF3D7_0708500	heat shock protein 86 family protein	Pf4000-5	0.045024
144-V05C	BSPZV1-144	2 wks post final dose	675000	Not Protected	PF3D7_0511200.1o2_8526	PF3D7_0511200.1o2	PF3D7_0511200	stearoyl-CoA delta 9 desaturase, putative	Pf4500-4	-0.460491
144-V05C	BSPZV1-144	2 wks post final dose	675000	Not Protected	PF3D7_0921400.1o2_8718	PF3D7_0921400.1o2	PF3D7_0921400	Fe-S-cluster redox enzyme, putative (NifU)	Pf4500-4	0.157654
144-V05C	BSPZV1-144	2 wks post final dose	675000	Not Protected	PF3D7_1016500.e1s1_7472	PF3D7_1016500.e1s1	PF3D7_1016500	Plasmodium exported protein (PHISTc), unknown function	Pf4500-4	1.61124
144-V05C	BSPZV1-144	2 wks post final dose	675000	Not Protected	PF3D7_0405500.iso1.exon1.amp1_3234	PF3D7_0405500.iso1.exon1.amp1	PF3D7_0405500	conserved Plasmodium protein, unknown function	Pf4000-5	0.242028
144-V05C	BSPZV1-144	2 wks post final dose	675000	Not Protected	PF3D7_1242500.iso1.exon1.amp1_999	PF3D7_1242500.iso1.exon1.amp1	PF3D7_1242500	conserved protein, unknown function	Pf4000-5	0.289939
144-V05C	BSPZV1-144	2 wks post final dose	675000	Not Protected	PF3D7_0702300.2o2_7331	PF3D7_0702300.2o2	PF3D7_0702300	sporozoite threonine and asparagine-rich protein (STARP)	Pf4500-4	0.0761465
144-V05C	BSPZV1-144	2 wks post final dose	675000	Not Protected	PF3D7_1226700.1o1_6187	PF3D7_1226700.1o1	PF3D7_1226700	conserved protein, unknown function	Pf4500-4	0.0792489
144-V05C	BSPZV1-144	2 wks post final dose	675000	Not Protected	PF3D7_0302600.iso1.exon1.amp1_1406	PF3D7_0302600.iso1.exon1.amp1	PF3D7_0302600	ABC transporter, (TAP family), putative	Pf4000-5	0.430986
144-V05C	BSPZV1-144	2 wks post final dose	675000	Not Protected	PF3D7_0830400.iso1.exon2.amp1_2348	PF3D7_0830400.iso1.exon2.amp1	PF3D7_0830400	conserved Plasmodium protein, unknown function	Pf4000-5	0.0799082
144-V05C	BSPZV1-144	2 wks post final dose	675000	Not Protected	PF3D7_0929000.e2_5102	PF3D7_0929000.e2	PF3D7_0929000	conserved Plasmodium protein, unknown function	Pf4500-4	0.89569
144-V05C	BSPZV1-144	2 wks post final dose	675000	Not Protected	PF3D7_1411900.1o1_7568	PF3D7_1411900.1o1	PF3D7_1411900	conserved Plasmodium protein, unknown function	Pf4500-4	0.0590556
144-V05C	BSPZV1-144	2 wks post final dose	675000	Not Protected	PF3D7_0517400.e1s2_9141	PF3D7_0517400.e1s2	PF3D7_0517400	FACT complex subunit SPT16, putative;with=GeneDB:PBANKA_123220 (FACT-L)	Pf4500-4	-0.0895828
144-V05C	BSPZV1-144	2 wks post final dose	675000	Not Protected	PF3D7_1415900.iso1.exon1.amp1_3521	PF3D7_1415900.iso1.exon1.amp1	PF3D7_1415900	conserved Plasmodium protein, unknown function	Pf4000-5	0.0330769
144-V05C	BSPZV1-144	2 wks post final dose	675000	Not Protected	PF3D7_0414100.iso1.exon4.amp2_2236	PF3D7_0414100.iso1.exon4.amp2	PF3D7_0414100	conserved Plasmodium membrane protein, unknown function	Pf4000-5	0.0147728
144-V05C	BSPZV1-144	2 wks post final dose	675000	Not Protected	PF3D7_1233200.iso2.exon1.amp2_seg2_2883	PF3D7_1233200.iso2.exon1.amp2_seg2	PF3D7_1233200	conserved Plasmodium protein, unknown function	Pf4000-5	0.343816
144-V05C	BSPZV1-144	2 wks post final dose	675000	Not Protected	PF3D7_0102400.1o2_8734	PF3D7_0102400.1o2	PF3D7_0102400	lysophospholipase, putative, pseudogene	Pf4500-4	0.0726712
144-V05C	BSPZV1-144	2 wks post final dose	675000	Not Protected	PF3D7_1205000.3o3_6203	PF3D7_1205000.3o3	PF3D7_1205000	conserved Plasmodium protein, unknown function	Pf4500-4	-1.91675
144-V05C	BSPZV1-144	2 wks post final dose	675000	Not Protected	PF3D7_0517300.e1_7983	PF3D7_0517300.e1	PF3D7_0517300	pre-mRNA-splicing factor (SR1)	Pf4500-4	-0.00908015
144-V05C	BSPZV1-144	2 wks post final dose	675000	Not Protected	PF3D7_0713800.iso1.exon2.amp1_3569	PF3D7_0713800.iso1.exon2.amp1	PF3D7_0713800	conserved Plasmodium protein, unknown function	Pf4000-5	0.307163
144-V05C	BSPZV1-144	2 wks post final dose	675000	Not Protected	PF3D7_1021000.iso1.exon4.amp1_1510	PF3D7_1021000.iso1.exon4.amp1	PF3D7_1021000	conserved Plasmodium protein, unknown function	Pf4000-5	0.298174
144-V05C	BSPZV1-144	2 wks post final dose	675000	Not Protected	PF3D7_1352500.e2_7688	PF3D7_1352500.e2	PF3D7_1352500	thioredoxin-related protein, putative	Pf4500-4	0.00864076
144-V05C	BSPZV1-144	2 wks post final dose	675000	Not Protected	PF3D7_0615400.iso1.exon8.amp1_2524	PF3D7_0615400.iso1.exon8.amp1	PF3D7_0615400	ribonuclease, putative	Pf4000-5	0.0159481
144-V05C	BSPZV1-144	2 wks post final dose	675000	Not Protected	PF3D7_1129400.iso1.exon1.amp1_3905	PF3D7_1129400.iso1.exon1.amp1	PF3D7_1129400	RNA methyltransferase, putative	Pf4000-5	0.0688141
144-V05C	BSPZV1-144	2 wks post final dose	675000	Not Protected	PF3D7_0204100.iso1.exon1.amp2_536	PF3D7_0204100.iso1.exon1.amp2	PF3D7_0204100	conserved Plasmodium protein, unknown function	Pf4000-5	1.43619
144-V05C	BSPZV1-144	2 wks post final dose	675000	Not Protected	PF3D7_0526200.iso2.exon7.amp1_2452	PF3D7_0526200.iso2.exon7.amp1	PF3D7_0526200	ADP-ribosylation factor GTPase-activating protein, putative	Pf4000-5	2.32596
144-V05C	BSPZV1-144	2 wks post final dose	675000	Not Protected	PF3D7_1423400.iso1.exon4.amp2_seg2_2588	PF3D7_1423400.iso1.exon4.amp2_seg2	PF3D7_1423400	conserved Plasmodium membrane protein, unknown function	Pf4000-5	0.0534429
144-V05C	BSPZV1-144	2 wks post final dose	675000	Not Protected	PF3D7_0603300.iso1.exon1.amp1_2181	PF3D7_0603300.iso1.exon1.amp1	PF3D7_0603300	dihydroorotate dehydrogenase, mitochondrial precursor	Pf4000-5	0.579342
144-V05C	BSPZV1-144	2 wks post final dose	675000	Not Protected	PF3D7_0631500.iso1.exon1.amp1_1845	PF3D7_0631500.iso1.exon1.amp1	PF3D7_0631500	Plasmodium exported protein (hyp4), unknown function	Pf4000-5	-0.0383189
144-V05C	BSPZV1-144	2 wks post final dose	675000	Not Protected	PF3D7_1440300.6o6_7592	PF3D7_1440300.6o6	PF3D7_1440300	delta-aminolevulinic acid dehydratase (ALAD)	Pf4500-4	-0.125058
144-V05C	BSPZV1-144	2 wks post final dose	675000	Not Protected	PF3D7_1020300.e1s1_7784	PF3D7_1020300.e1s1	PF3D7_1020300	cytoplasmic dynein intermediate chain, putative	Pf4500-4	1.74733
144-V05C	BSPZV1-144	2 wks post final dose	675000	Not Protected	PF3D7_1331100.iso1.exon5.amp1_1893	PF3D7_1331100.iso1.exon5.amp1	PF3D7_1331100	DEAD box helicase, putative	Pf4000-5	1.21959
144-V05C	BSPZV1-144	2 wks post final dose	675000	Not Protected	PF3D7_1408700.e2s1_6634	PF3D7_1408700.e2s1	PF3D7_1408700	conserved Plasmodium protein, unknown function	Pf4500-4	0.668459
144-V05C	BSPZV1-144	2 wks post final dose	675000	Not Protected	PF3D7_1408700.e1s3_7720	PF3D7_1408700.e1s3	PF3D7_1408700	conserved Plasmodium protein, unknown function	Pf4500-4	-0.513116
144-V05C	BSPZV1-144	2 wks post final dose	675000	Not Protected	PF3D7_0112900.2o2_6108	PF3D7_0112900.2o2	PF3D7_0112900	Plasmodium exported protein, unknown function	Pf4500-4	-0.24729
144-V05C	BSPZV1-144	2 wks post final dose	675000	Not Protected	PF3D7_0819700.1o1_5621	PF3D7_0819700.1o1	PF3D7_0819700	conserved Plasmodium protein, unknown function	Pf4500-4	-0.070447
144-V05C	BSPZV1-144	2 wks post final dose	675000	Not Protected	PF3D7_1027400.iso1.exon2.amp1_4120	PF3D7_1027400.iso1.exon2.amp1	PF3D7_1027400	DNA-directed RNA polymerase II, putative	Pf4000-5	-0.821281
144-V05C	BSPZV1-144	2 wks post final dose	675000	Not Protected	PF3D7_0524800.iso1.exon2.amp1_81	PF3D7_0524800.iso1.exon2.amp1	PF3D7_0524800	ubiquitin fusion degradation protein UFD1, putative	Pf4000-5	0.101844
144-V05C	BSPZV1-144	2 wks post final dose	675000	Not Protected	PF3D7_0606300.iso1.exon1.amp1_1534	PF3D7_0606300.iso1.exon1.amp1	PF3D7_0606300	conserved Plasmodium protein, unknown function	Pf4000-5	0.337876
144-V05C	BSPZV1-144	2 wks post final dose	675000	Not Protected	PF3D7_1232500.iso1.exon2.amp1_959	PF3D7_1232500.iso1.exon2.amp1	PF3D7_1232500	CG2-related protein, putative	Pf4000-5	0.340224
144-V05C	BSPZV1-144	2 wks post final dose	675000	Not Protected	PF3D7_0425700.iso1.exon1.amp1_4168	PF3D7_0425700.iso1.exon1.amp1	PF3D7_0425700	rifin	Pf4000-5	4.10862
144-V05C	BSPZV1-144	2 wks post final dose	675000	Not Protected	PF3D7_0801900.iso1.exon1.amp2_800	PF3D7_0801900.iso1.exon1.amp2	PF3D7_0801900	conserved Plasmodium protein, unknown function	Pf4000-5	0.295918
144-V05C	BSPZV1-144	2 wks post final dose	675000	Not Protected	PF3D7_1116100.iso1.exon1.amp1_2276	PF3D7_1116100.iso1.exon1.amp1	PF3D7_1116100	serine esterase, putative	Pf4000-5	0.46638
144-V05C	BSPZV1-144	2 wks post final dose	675000	Not Protected	PF3D7_0604600.iso1.exon2.amp1_1901	PF3D7_0604600.iso1.exon2.amp1	PF3D7_0604600	DNA helicase, putative	Pf4000-5	0.361184
144-V05C	BSPZV1-144	2 wks post final dose	675000	Not Protected	PF3D7_0910400.iso1.exon1.amp2_seg2_864	PF3D7_0910400.iso1.exon1.amp2_seg2	PF3D7_0910400	selenide water dikinase, putative	Pf4000-5	0.53494
144-V05C	BSPZV1-144	2 wks post final dose	675000	Not Protected	PF3D7_1221400.e1s1_6610	PF3D7_1221400.e1s1	PF3D7_1221400	membrane skeletal protein, putative (ALV3)	Pf4500-4	0.811174
144-V05C	BSPZV1-144	2 wks post final dose	675000	Not Protected	PF3D7_1007800.iso1.exon1.amp1_1414	PF3D7_1007800.iso1.exon1.amp1	PF3D7_1007800	conserved Plasmodium protein, unknown function	Pf4000-5	0.374531
144-V05C	BSPZV1-144	2 wks post final dose	675000	Not Protected	PF3D7_1453300.iso1.exon1.amp1_648	PF3D7_1453300.iso1.exon1.amp1	PF3D7_1453300	conserved protein, unknown function	Pf4000-5	0.128712
144-V05C	BSPZV1-144	2 wks post final dose	675000	Not Protected	PF3D7_1105600.e1s1_6922	PF3D7_1105600.e1s1	PF3D7_1105600	translocon component PTEX88 (PTEX88)	Pf4500-4	0.261397
144-V05C	BSPZV1-144	2 wks post final dose	675000	Not Protected	PF3D7_1408700.e1s2_6563	PF3D7_1408700.e1s2	PF3D7_1408700	conserved Plasmodium protein, unknown function	Pf4500-4	0.308034
144-V05C	BSPZV1-144	2 wks post final dose	675000	Not Protected	PF3D7_0719900.iso1.exon1.amp3_816	PF3D7_0719900.iso1.exon1.amp3	PF3D7_0719900	conserved Plasmodium membrane protein, unknown function	Pf4000-5	0.506513
144-V05C	BSPZV1-144	2 wks post final dose	675000	Not Protected	PF3D7_0406500.iso1.exon2.amp4_169	PF3D7_0406500.iso1.exon2.amp4	PF3D7_0406500	conserved Plasmodium protein, unknown function	Pf4000-5	0.123451
144-V05C	BSPZV1-144	2 wks post final dose	675000	Not Protected	PF3D7_0419500.1o1_5301	PF3D7_0419500.1o1	PF3D7_0419500	conserved Plasmodium membrane protein, unknown function	Pf4500-4	0.453519
144-V05C	BSPZV1-144	2 wks post final dose	675000	Not Protected	PF3D7_1032900.e4s1_5964	PF3D7_1032900.e4s1	PF3D7_1032900	RNA polymerase II-associated protein 1, putative	Pf4500-4	0.205205
144-V05C	BSPZV1-144	2 wks post final dose	675000	Not Protected	PF3D7_0316200.iso1.exon2.amp2_1957	PF3D7_0316200.iso1.exon2.amp2	PF3D7_0316200	conserved Plasmodium protein, unknown function	Pf4000-5	0.045024
144-V05C	BSPZV1-144	2 wks post final dose	675000	Not Protected	PF3D7_1208100.e3s2_7496	PF3D7_1208100.e3s2	PF3D7_1208100	conserved Plasmodium protein, unknown function	Pf4500-4	0.046989
144-V05C	BSPZV1-144	2 wks post final dose	675000	Not Protected	PF3D7_1232500.iso1.exon1.amp1_2763	PF3D7_1232500.iso1.exon1.amp1	PF3D7_1232500	CG2-related protein, putative	Pf4000-5	0.374684
144-V05C	BSPZV1-144	2 wks post final dose	675000	Not Protected	PF3D7_1475400.e2s1_5110	PF3D7_1475400.e2s1	PF3D7_1475400	cysteine repeat modular protein 4 (CRMP4)	Pf4500-4	0.0941203
144-V05C	BSPZV1-144	2 wks post final dose	675000	Not Protected	PF3D7_1432800.1o1_6770	PF3D7_1432800.1o1	PF3D7_1432800	conserved Plasmodium protein, unknown function	Pf4500-4	-0.302986
144-V05C	BSPZV1-144	2 wks post final dose	675000	Not Protected	PF3D7_1215200.iso1.exon1.amp1_1558	PF3D7_1215200.iso1.exon1.amp1	PF3D7_1215200	peptidyl-prolyl cis-trans isomerase	Pf4000-5	0.580667
144-V05C	BSPZV1-144	2 wks post final dose	675000	Not Protected	PF3D7_1441300.e5s1_5485	PF3D7_1441300.e5s1	PF3D7_1441300	serine/threonine protein kinase, putative	Pf4500-4	0.66494
144-V05C	BSPZV1-144	2 wks post final dose	675000	Not Protected	PF3D7_0917900.e2_8279	PF3D7_0917900.e2	PF3D7_0917900	heat shock protein 70 (Hsp70-2)	Pf4500-4	1.85942
144-V05C	BSPZV1-144	2 wks post final dose	675000	Not Protected	PF3D7_0933500.s2_8550	PF3D7_0933500.s2	PF3D7_0933500	conserved Plasmodium protein, unknown function	Pf4500-4	0.0297357
144-V05C	BSPZV1-144	2 wks post final dose	675000	Not Protected	PF3D7_1219900.1o1_5820	PF3D7_1219900.1o1	PF3D7_1219900	D-ribulose-5-phosphate 3-epimerase, putative	Pf4500-4	0.569148
144-V05C	BSPZV1-144	2 wks post final dose	675000	Not Protected	PF3D7_1462400.e1s4_8885	PF3D7_1462400.e1s4	PF3D7_1462400	conserved Plasmodium protein, unknown function	Pf4500-4	0.191104
144-V05C	BSPZV1-144	2 wks post final dose	675000	Not Protected	PF3D7_0800700.e3s1_5772	PF3D7_0800700.e3s1	PF3D7_0800700	surface-associated interspersed gene 8.3 (SURFIN8.3) (SURF8.3)	Pf4500-4	-0.0392394
144-V05C	BSPZV1-144	2 wks post final dose	675000	Not Protected	PF3D7_1131800.iso1.exon1.amp2_3641	PF3D7_1131800.iso1.exon1.amp2	PF3D7_1131800	oxysterol-binding protein-related protein 2	Pf4000-5	0.3207
144-V05C	BSPZV1-144	2 wks post final dose	675000	Not Protected	PF3D7_0717700.e1s1_9221	PF3D7_0717700.e1s1	PF3D7_0717700	seryl-tRNA synthetase, putative	Pf4500-4	0.163169
144-V05C	BSPZV1-144	2 wks post final dose	675000	Not Protected	PF3D7_1014300.e1s2_4894	PF3D7_1014300.e1s2	PF3D7_1014300	conserved protein, unknown function	Pf4500-4	-0.0172431
144-V05C	BSPZV1-144	2 wks post final dose	675000	Not Protected	PF3D7_0408500.1o1_5900	PF3D7_0408500.1o1	PF3D7_0408500	flap endonuclease 1 (FEN1)	Pf4500-4	0.00288608
144-V05C	BSPZV1-144	2 wks post final dose	675000	Not Protected	PF3D7_1364400.e1s3_6275	PF3D7_1364400.e1s3	PF3D7_1364400	conserved Plasmodium protein, unknown function	Pf4500-4	-0.0152953
144-V05C	BSPZV1-144	2 wks post final dose	675000	Not Protected	PF3D7_1221000.e1s3_4910	PF3D7_1221000.e1s3	PF3D7_1221000	histone-lysine N-methyltransferase, H3 lysine-4 specific (SET10)	Pf4500-4	1.25383
144-V05C	BSPZV1-144	2 wks post final dose	675000	Not Protected	PF3D7_1143100.iso1.exon1.amp2_1039	PF3D7_1143100.iso1.exon1.amp2	PF3D7_1143100	transcription factor with AP2 domain(s)	Pf4000-5	0.431573
144-V05C	BSPZV1-144	2 wks post final dose	675000	Not Protected	PF3D7_0206100.1o4_7281	PF3D7_0206100.1o4	PF3D7_0206100	iron-sulfur assembly protein, putative (SufE)	Pf4500-4	-0.406907
144-V05C	BSPZV1-144	2 wks post final dose	675000	Not Protected	PF3D7_0726500.iso1.exon4.amp4_3354	PF3D7_0726500.iso1.exon4.amp4	PF3D7_0726500	ubiquitin carboxyl-terminal hydrolase, putative	Pf4000-5	0.116528
144-V05C	BSPZV1-144	2 wks post final dose	675000	Not Protected	PF3D7_0415200.iso1.exon1.amp1_3138	PF3D7_0415200.iso1.exon1.amp1	PF3D7_0415200	conserved Plasmodium protein, unknown function	Pf4000-5	0.0477081
144-V05C	BSPZV1-144	2 wks post final dose	675000	Not Protected	PF3D7_0526000.1o1_5054	PF3D7_0526000.1o1	PF3D7_0526000	RAP protein, putative	Pf4500-4	0.289559
144-V05C	BSPZV1-144	2 wks post final dose	675000	Not Protected	PF3D7_1112200.iso1.exon1.amp1_3593	PF3D7_1112200.iso1.exon1.amp1	PF3D7_1112200	coq4 homolog, putative	Pf4000-5	0.217037
144-V05C	BSPZV1-144	2 wks post final dose	675000	Not Protected	PF3D7_0101000.iso1.exon1.amp1_2157	PF3D7_0101000.iso1.exon1.amp1	PF3D7_0101000	rifin	Pf4000-5	0.511799
144-V05C	BSPZV1-144	2 wks post final dose	675000	Not Protected	PF3D7_1329000.e1s2_6850	PF3D7_1329000.e1s2	PF3D7_1329000	DNA-directed RNA polymerase 3 largest subunit	Pf4500-4	1.05433
144-V05C	BSPZV1-144	2 wks post final dose	675000	Not Protected	PF3D7_1218900.1o1_8510	PF3D7_1218900.1o1	PF3D7_1218900	conserved Plasmodium protein, unknown function	Pf4500-4	-0.0936872
144-V05C	BSPZV1-144	2 wks post final dose	675000	Not Protected	PF3D7_1470500.5o6_7066	PF3D7_1470500.5o6	PF3D7_1470500	phosphodiesterase delta, putative (PDEdelta)	Pf4500-4	0.362827
144-V05C	BSPZV1-144	2 wks post final dose	675000	Not Protected	PF3D7_1338200.e1s1_8917	PF3D7_1338200.e1s1	PF3D7_1338200	60S ribosomal protein L6-2, putative	Pf4500-4	-0.0388436
144-V05C	BSPZV1-144	2 wks post final dose	675000	Not Protected	PF3D7_0614700.1o2_4743	PF3D7_0614700.1o2	PF3D7_0614700	conserved Plasmodium protein, unknown function	Pf4500-4	0.0590556
144-V05C	BSPZV1-144	2 wks post final dose	675000	Not Protected	PF3D7_0300100.iso1.exon1.amp2_4256	PF3D7_0300100.iso1.exon1.amp2	PF3D7_0300100	erythrocyte membrane protein 1, PfEMP1	Pf4000-5	0.0557305
144-V05C	BSPZV1-144	2 wks post final dose	675000	Not Protected	PF3D7_1028700.1o1_8478	PF3D7_1028700.1o1	PF3D7_1028700	merozoite TRAP-like protein (MTRAP)	Pf4500-4	2.56219
144-V05C	BSPZV1-144	2 wks post final dose	675000	Not Protected	PF3D7_1404600.iso2.exon18.amp1_74	PF3D7_1404600.iso2.exon18.amp1	PF3D7_1404600	adenylyl cyclase alpha	Pf4000-5	0.191605
144-V05C	BSPZV1-144	2 wks post final dose	675000	Not Protected	PF3D7_1136000.iso1.exon2.amp2_1103	PF3D7_1136000.iso1.exon2.amp2	PF3D7_1136000	conserved Plasmodium protein, unknown function	Pf4000-5	0.295595
144-V05C	BSPZV1-144	2 wks post final dose	675000	Not Protected	PF3D7_1121800.s2_7113	PF3D7_1121800.s2	PF3D7_1121800	petidase, M16 family	Pf4500-4	0.209209
144-V05C	BSPZV1-144	2 wks post final dose	675000	Not Protected	PF3D7_0712000.iso1.exon1.amp1_145	PF3D7_0712000.iso1.exon1.amp1	PF3D7_0712000	erythrocyte membrane protein 1, PfEMP1	Pf4000-5	2.01981
144-V05C	BSPZV1-144	2 wks post final dose	675000	Not Protected	PF3D7_0408700.e1s1_5150	PF3D7_0408700.e1s1	PF3D7_0408700	perforin like protein 1 (SPECT2)	Pf4500-4	0.140984
144-V05C	BSPZV1-144	2 wks post final dose	675000	Not Protected	PF3D7_0223500.iso1.exon2.amp1_4551	PF3D7_0223500.iso1.exon2.amp1	PF3D7_0223500	erythrocyte membrane protein 1, PfEMP1	Pf4000-5	0.276925
144-V05C	BSPZV1-144	2 wks post final dose	675000	Not Protected	PF3D7_0502700.iso1.exon2.amp1_3857	PF3D7_0502700.iso1.exon2.amp1	PF3D7_0502700	conserved Plasmodium protein, unknown function	Pf4000-5	0.821736
144-V05C	BSPZV1-144	2 wks post final dose	675000	Not Protected	PF3D7_0726400.e3s1_8933	PF3D7_0726400.e3s1	PF3D7_0726400	conserved Plasmodium membrane protein, unknown function	Pf4500-4	0.0765118
144-V05C	BSPZV1-144	2 wks post final dose	675000	Not Protected	PF3D7_1105700.e1s1_6898	PF3D7_1105700.e1s1	PF3D7_1105700	conserved protein, unknown function	Pf4500-4	0.0340684
144-V05C	BSPZV1-144	2 wks post final dose	675000	Not Protected	PF3D7_1003200.1o2_7832	PF3D7_1003200.1o2	PF3D7_1003200	conserved Plasmodium protein, unknown function	Pf4500-4	-0.4894
144-V05C	BSPZV1-144	2 wks post final dose	675000	Not Protected	PF3D7_0519500.e1s3_8071	PF3D7_0519500.e1s3	PF3D7_0519500	carbon catabolite repressor protein 4, putative (CCR4)	Pf4500-4	-0.278018
144-V05C	BSPZV1-144	2 wks post final dose	675000	Not Protected	PF3D7_0807400.iso1.exon5.amp1_2372	PF3D7_0807400.iso1.exon5.amp1	PF3D7_0807400	conserved Plasmodium protein, unknown function	Pf4000-5	0.269225
144-V05C	BSPZV1-144	2 wks post final dose	675000	Not Protected	PF3D7_1462400.e1s1_5413	PF3D7_1462400.e1s1	PF3D7_1462400	conserved Plasmodium protein, unknown function	Pf4500-4	-0.308462
144-V05C	BSPZV1-144	2 wks post final dose	675000	Not Protected	PF3D7_1131200.iso1.exon6.amp1_345	PF3D7_1131200.iso1.exon6.amp1	PF3D7_1131200	conserved Plasmodium protein, unknown function	Pf4000-5	0.209523
144-V05C	BSPZV1-144	2 wks post final dose	675000	Not Protected	PF3D7_1036300.1o1_6786	PF3D7_1036300.1o1	PF3D7_1036300	merozoite surface protein (MSP3.8)	Pf4500-4	-0.0176329
144-V05C	BSPZV1-144	2 wks post final dose	675000	Not Protected	PF3D7_0111800.iso1.exon1.amp1_2420	PF3D7_0111800.iso1.exon1.amp1	PF3D7_0111800	conserved Plasmodium protein, unknown function	Pf4000-5	0.147601
144-V05C	BSPZV1-144	2 wks post final dose	675000	Not Protected	PF3D7_0623400.1o1_5006	PF3D7_0623400.1o1	PF3D7_0623400	RNA-binding protein mei2 homologue, putative	Pf4500-4	1.52646
144-V05C	BSPZV1-144	2 wks post final dose	675000	Not Protected	PF3D7_1150000.iso1.exon2.amp1_3314	PF3D7_1150000.iso1.exon2.amp1	PF3D7_1150000	rifin	Pf4000-5	1.28588
144-V05C	BSPZV1-144	2 wks post final dose	675000	Not Protected	PF3D7_0416700.iso1.exon1.amp1_1247	PF3D7_0416700.iso1.exon1.amp1	PF3D7_0416700	CDGSH iron-sulfur domain-containing protein, putative	Pf4000-5	0.663246
144-V05C	BSPZV1-144	2 wks post final dose	675000	Not Protected	PF3D7_0937800.iso1.exon2.amp1_1654	PF3D7_0937800.iso1.exon2.amp1	PF3D7_0937800	erythrocyte membrane protein 1, PfEMP1	Pf4000-5	0.438894
144-V05C	BSPZV1-144	2 wks post final dose	675000	Not Protected	PF3D7_1010100_7425	PF3D7_1010100	PF3D7_1010100	conserved Plasmodium protein, unknown function	Pf4500-4	-0.1816
144-V05C	BSPZV1-144	2 wks post final dose	675000	Not Protected	PF3D7_1023200.1o1_6706	PF3D7_1023200.1o1	PF3D7_1023200	orotidine monophosphate decarboxylase (OMPDC)	Pf4500-4	1.16643
144-V05C	BSPZV1-144	2 wks post final dose	675000	Not Protected	PF3D7_0108100.iso1.exon1.amp1_2755	PF3D7_0108100.iso1.exon1.amp1	PF3D7_0108100	conserved Plasmodium protein, unknown function	Pf4000-5	0.0691916
144-V05C	BSPZV1-144	2 wks post final dose	675000	Not Protected	PF3D7_0307100.e2s1_8319	PF3D7_0307100.e2s1	PF3D7_0307100	40S ribosomal protein S12, putative	Pf4500-4	0.341858
144-V05C	BSPZV1-144	2 wks post final dose	675000	Not Protected	PF3D7_0705000.e1s2_6251	PF3D7_0705000.e1s2	PF3D7_0705000	methyltransferase, putative	Pf4500-4	3.06408
144-V05C	BSPZV1-144	2 wks post final dose	675000	Not Protected	PF3D7_0504800.iso1.exon1.amp4_2245	PF3D7_0504800.iso1.exon1.amp4	PF3D7_0504800	conserved Plasmodium protein, unknown function	Pf4000-5	0.332855
144-V05C	BSPZV1-144	2 wks post final dose	675000	Not Protected	PF3D7_0606000.iso1.exon1.amp2_2795	PF3D7_0606000.iso1.exon1.amp2	PF3D7_0606000	conserved Plasmodium protein, unknown function	Pf4000-5	-0.267913
144-V05C	BSPZV1-144	2 wks post final dose	675000	Not Protected	PF3D7_1245300.iso1.exon2.amp1_4384	PF3D7_1245300.iso1.exon2.amp1	PF3D7_1245300	ubiquitin conjugating enzyme E2, putative	Pf4000-5	0.330023
144-V05C	BSPZV1-144	2 wks post final dose	675000	Not Protected	PF3D7_0322200.iso1.exon6.amp1_4072	PF3D7_0322200.iso1.exon6.amp1	PF3D7_0322200	conserved Plasmodium protein, unknown function	Pf4000-5	-0.137187
144-V05C	BSPZV1-144	2 wks post final dose	675000	Not Protected	PF3D7_1134500.s1_5988	PF3D7_1134500.s1	PF3D7_1134500	alpha/beta hydrolase, putative	Pf4500-4	0.199178
144-V05C	BSPZV1-144	2 wks post final dose	675000	Not Protected	PF3D7_1217700.1o1_5589	PF3D7_1217700.1o1	PF3D7_1217700	conserved Plasmodium protein, unknown function	Pf4500-4	-0.265463
144-V05C	BSPZV1-144	2 wks post final dose	675000	Not Protected	PF3D7_0810100.iso1.exon2.amp1_4096	PF3D7_0810100.iso1.exon2.amp1	PF3D7_0810100	apicoplast ribosomal protein L33 precursor, putative	Pf4000-5	-0.144171
144-V05C	BSPZV1-144	2 wks post final dose	675000	Not Protected	PF3D7_0303300.2o2_6395	PF3D7_0303300.2o2	PF3D7_0303300	DNA-directed RNA polymerase subunit I, putative	Pf4500-4	-0.262688
144-V05C	BSPZV1-144	2 wks post final dose	675000	Not Protected	PF3D7_1012100.iso1.exon1.amp1_2444	PF3D7_1012100.iso1.exon1.amp1	PF3D7_1012100	conserved Plasmodium protein, unknown function	Pf4000-5	0.308442
144-V05C	BSPZV1-144	2 wks post final dose	675000	Not Protected	PF3D7_1465900.e3s1_8909	PF3D7_1465900.e3s1	PF3D7_1465900	40S ribosomal protein S3, putative	Pf4500-4	0.618905
144-V05C	BSPZV1-144	2 wks post final dose	675000	Not Protected	PF3D7_0908300.iso2.exon3.amp1_3809	PF3D7_0908300.iso2.exon3.amp1	PF3D7_0908300	conserved Plasmodium membrane protein, unknown function	Pf4000-5	-0.0233518
144-V05C	BSPZV1-144	2 wks post final dose	675000	Not Protected	PF3D7_0710000.e5s1_4871	PF3D7_0710000.e5s1	PF3D7_0710000	conserved Plasmodium protein, unknown function	Pf4500-4	0.0577609
144-V05C	BSPZV1-144	2 wks post final dose	675000	Not Protected	PF3D7_0103600.1o4_5078	PF3D7_0103600.1o4	PF3D7_0103600	ATP-dependent RNA helicase, putative	Pf4500-4	0.195819
144-V05C	BSPZV1-144	2 wks post final dose	675000	Not Protected	PF3D7_0307500.iso1.exon4.amp1_417	PF3D7_0307500.iso1.exon4.amp1	PF3D7_0307500	conserved Plasmodium protein, unknown function	Pf4000-5	1.20033
144-V05C	BSPZV1-144	2 wks post final dose	675000	Not Protected	PF3D7_0726400.e5s1_6315	PF3D7_0726400.e5s1	PF3D7_0726400	conserved Plasmodium membrane protein, unknown function	Pf4500-4	0.459974
144-V05C	BSPZV1-144	2 wks post final dose	675000	Not Protected	PF3D7_0611800.iso1.exon5.amp1_seg1_1151	PF3D7_0611800.iso1.exon5.amp1_seg1	PF3D7_0611800	conserved Plasmodium protein, unknown function	Pf4000-5	0.883888
144-V05C	BSPZV1-144	2 wks post final dose	675000	Not Protected	PF3D7_1319400.iso1.exon5.amp1_3785	PF3D7_1319400.iso1.exon5.amp1	PF3D7_1319400	conserved Plasmodium protein, unknown function	Pf4000-5	-0.66526
144-V05C	BSPZV1-144	2 wks post final dose	675000	Not Protected	PF3D7_1100100.iso1.exon2.amp1_1582	PF3D7_1100100.iso1.exon2.amp1	PF3D7_1100100	erythrocyte membrane protein 1, PfEMP1	Pf4000-5	0.542572
144-V05C	BSPZV1-144	2 wks post final dose	675000	Not Protected	PF3D7_0314800.iso1.exon2.amp1_1015	PF3D7_0314800.iso1.exon2.amp1	PF3D7_0314800	conserved Plasmodium protein, unknown function	Pf4000-5	0.28556
144-V05C	BSPZV1-144	2 wks post final dose	675000	Not Protected	PF3D7_0412700.iso1.exon2.amp1_792	PF3D7_0412700.iso1.exon2.amp1	PF3D7_0412700	erythrocyte membrane protein 1, PfEMP1	Pf4000-5	0.431279
144-V05C	BSPZV1-144	2 wks post final dose	675000	Not Protected	PF3D7_0602300.1o1_8726	PF3D7_0602300.1o1	PF3D7_0602300	liver merozoite formation protein, putative;with=GeneDB:PBANKA_010110 (PALM)	Pf4500-4	-0.311087
144-V05C	BSPZV1-144	2 wks post final dose	675000	Not Protected	PF3D7_0600200.iso1.exon2.amp1_425	PF3D7_0600200.iso1.exon2.amp1	PF3D7_0600200	erythrocyte membrane protein 1, PfEMP1	Pf4000-5	0.355624
144-V05C	BSPZV1-144	2 wks post final dose	675000	Not Protected	PF3D7_1315900.iso1.exon1.amp1_3953	PF3D7_1315900.iso1.exon1.amp1	PF3D7_1315900	exportin 1-like protein, putative	Pf4000-5	-0.122456
144-V05C	BSPZV1-144	2 wks post final dose	675000	Not Protected	PF3D7_1407600.iso1.exon1.amp3_2205	PF3D7_1407600.iso1.exon1.amp3	PF3D7_1407600	conserved Plasmodium protein, unknown function	Pf4000-5	0.0843967
144-V05C	BSPZV1-144	2 wks post final dose	675000	Not Protected	PF3D7_1416600.e1s2_8079	PF3D7_1416600.e1s2	PF3D7_1416600	conserved Plasmodium protein, unknown function	Pf4500-4	-0.235678
144-V05C	BSPZV1-144	2 wks post final dose	675000	Not Protected	PF3D7_1217800.iso1.exon1.amp1_66	PF3D7_1217800.iso1.exon1.amp1	PF3D7_1217800	zinc finger protein, putative	Pf4000-5	0.307802
144-V05C	BSPZV1-144	2 wks post final dose	675000	Not Protected	PF3D7_1359800.iso1.exon3.amp1_672	PF3D7_1359800.iso1.exon3.amp1	PF3D7_1359800	ADP-ribosylation factor, putative	Pf4000-5	0.55138
144-V05C	BSPZV1-144	2 wks post final dose	675000	Not Protected	PF3D7_0614800.iso1.exon1.amp1_433	PF3D7_0614800.iso1.exon1.amp1	PF3D7_0614800	endonuclease III homologue, putative	Pf4000-5	1.13395
144-V05C	BSPZV1-144	2 wks post final dose	675000	Not Protected	PF3D7_1220300.iso1.exon2.amp3_1367	PF3D7_1220300.iso1.exon2.amp3	PF3D7_1220300	Cell cycle associated protein, putative	Pf4000-5	0.0686253
144-V05C	BSPZV1-144	2 wks post final dose	675000	Not Protected	PF3D7_0213600.iso1.exon7.amp1_1774	PF3D7_0213600.iso1.exon7.amp1	PF3D7_0213600	conserved Plasmodium protein, unknown function	Pf4000-5	-0.810129
144-V05C	BSPZV1-144	2 wks post final dose	675000	Not Protected	PF3D7_1338900.1o1_7074	PF3D7_1338900.1o1	PF3D7_1338900	serine/threonine protein kinase, putative	Pf4500-4	-0.11689
144-V05C	BSPZV1-144	2 wks post final dose	675000	Not Protected	PF3D7_1330500.1o1_7643	PF3D7_1330500.1o1	PF3D7_1330500	conserved Plasmodium protein, unknown function	Pf4500-4	0.113832
144-V05C	BSPZV1-144	2 wks post final dose	675000	Not Protected	PF3D7_1425300.iso1.exon6.amp1_1822	PF3D7_1425300.iso1.exon6.amp1	PF3D7_1425300	conserved Plasmodium protein, unknown function	Pf4000-5	-0.242395
144-V05C	BSPZV1-144	2 wks post final dose	675000	Not Protected	PF3D7_0301900.1o1_7888	PF3D7_0301900.1o1	PF3D7_0301900	conserved Plasmodium protein, unknown function	Pf4500-4	2.16605
144-V05C	BSPZV1-144	2 wks post final dose	675000	Not Protected	PF3D7_0826300.1o1_6730	PF3D7_0826300.1o1	PF3D7_0826300	SPRY domain, putative	Pf4500-4	1.49565
144-V05C	BSPZV1-144	2 wks post final dose	675000	Not Protected	PF3D7_0903800.iso1.exon2.amp1_1662	PF3D7_0903800.iso1.exon2.amp1	PF3D7_0903800	LCCL domain-containing protein	Pf4000-5	0.0361695
144-V05C	BSPZV1-144	2 wks post final dose	675000	Not Protected	PF3D7_0916600.1o1_6683	PF3D7_0916600.1o1	PF3D7_0916600	methyltransferase, putative	Pf4500-4	0.086341
144-V05C	BSPZV1-144	2 wks post final dose	675000	Not Protected	PF3D7_0422800.s2 (renamed)_8486	PF3D7_0422800.s2 (renamed)	PF3D7_0422800	serpentine receptor, putative (PfSR12)	Pf4500-4	-0.224384
144-V05C	BSPZV1-144	2 wks post final dose	675000	Not Protected	PF3D7_1019700.iso1.exon1.amp2_4240	PF3D7_1019700.iso1.exon1.amp2	PF3D7_1019700	conserved Plasmodium protein, unknown function	Pf4000-5	0.157398
144-V05C	BSPZV1-144	2 wks post final dose	675000	Not Protected	PF3D7_1433800.iso1.exon1.amp2_529	PF3D7_1433800.iso1.exon1.amp2	PF3D7_1433800	conserved Plasmodium protein, unknown function	Pf4000-5	0.909304
144-V05C	BSPZV1-144	2 wks post final dose	675000	Not Protected	PFC10_API0032.iso1.exon1.amp1_1175	PFC10_API0032.iso1.exon1.amp1	PFC10_API0032	probable protein, unknown function (ORF91)	Pf4000-5	0.0568729
144-V05C	BSPZV1-144	2 wks post final dose	675000	Not Protected	PF3D7_0301400.2o2_4671	PF3D7_0301400.2o2	PF3D7_0301400	Plasmodium exported protein, unknown function	Pf4500-4	0.202195
144-V05C	BSPZV1-144	2 wks post final dose	675000	Not Protected	PF3D7_1423100.iso1.exon1.amp1_3338	PF3D7_1423100.iso1.exon1.amp1	PF3D7_1423100	ankyrin, putative	Pf4000-5	0.283934
144-V05C	BSPZV1-144	2 wks post final dose	675000	Not Protected	PF3D7_1200400.iso1.exon1.amp2_776	PF3D7_1200400.iso1.exon1.amp2	PF3D7_1200400	erythrocyte membrane protein 1, PfEMP1	Pf4000-5	0.241861
144-V05C	BSPZV1-144	2 wks post final dose	675000	Not Protected	PF3D7_1361900.e1s1_8335	PF3D7_1361900.e1s1	PF3D7_1361900	proliferating cell nuclear antigen (PCNA)	Pf4500-4	1.26292
144-V05C	BSPZV1-144	2 wks post final dose	675000	Not Protected	PF3D7_1031500.iso1.exon4.amp1_656	PF3D7_1031500.iso1.exon4.amp1	PF3D7_1031500	DEAD/DEAH box helicase, putative	Pf4000-5	0.638914
144-V05C	BSPZV1-144	2 wks post final dose	675000	Not Protected	PF3D7_1347800.iso1.exon4.amp1_928	PF3D7_1347800.iso1.exon4.amp1	PF3D7_1347800	leucine-rich repeat protein	Pf4000-5	-0.424373
144-V05C	BSPZV1-144	2 wks post final dose	675000	Not Protected	PF3D7_1241600.iso1.exon2.amp1_2364	PF3D7_1241600.iso1.exon2.amp1	PF3D7_1241600	mitochondrial carrier protein, putative	Pf4000-5	0.229249
144-V05C	BSPZV1-144	2 wks post final dose	675000	Not Protected	PF3D7_0521300.iso1.exon3.amp2_seg2_577	PF3D7_0521300.iso1.exon3.amp2_seg2	PF3D7_0521300	conserved Plasmodium protein, unknown function	Pf4000-5	1.71482
144-V05C	BSPZV1-144	2 wks post final dose	675000	Not Protected	PF3D7_1428500.iso1.exon3.amp3_1079	PF3D7_1428500.iso1.exon3.amp3	PF3D7_1428500	protein kinase, putative	Pf4000-5	0.341787
144-V05C	BSPZV1-144	2 wks post final dose	675000	Not Protected	MAL13P1.303e1s1_8566	MAL13P1.303e1s1	PF3D7_1360900	polyadenylate binding protein, putative	Pf4500-4	0.112764
144-V05C	BSPZV1-144	2 wks post final dose	675000	Not Protected	PF3D7_1145000.iso1.exon1.amp1_98	PF3D7_1145000.iso1.exon1.amp1	PF3D7_1145000	conserved Plasmodium protein, unknown function	Pf4000-5	0.144739
144-V05C	BSPZV1-144	2 wks post final dose	675000	Not Protected	PF3D7_0406400.iso1.exon7.amp1_2660	PF3D7_0406400.iso1.exon7.amp1	PF3D7_0406400	cytosolic glyoxalase II	Pf4000-5	0.192299
144-V05C	BSPZV1-144	2 wks post final dose	675000	Not Protected	PF3D7_1015300.e1s1_7760	PF3D7_1015300.e1s1	PF3D7_1015300	methionine aminopeptidase 1b, putative (MetAP1b)	Pf4500-4	-0.140048
144-V05C	BSPZV1-144	2 wks post final dose	675000	Not Protected	PF3D7_1327000.iso1.exon3.amp2_2804	PF3D7_1327000.iso1.exon3.amp2	PF3D7_1327000	conserved Plasmodium protein, unknown function	Pf4000-5	1.15438
144-V05C	BSPZV1-144	2 wks post final dose	675000	Not Protected	PF3D7_1300800.iso1.exon3.amp1_3282	PF3D7_1300800.iso1.exon3.amp1	PF3D7_1300800	erythrocyte membrane protein 1-like	Pf4000-5	0.179419
144-V05C	BSPZV1-144	2 wks post final dose	675000	Not Protected	PF3D7_0205600.1o1_5892	PF3D7_0205600.1o1	PF3D7_0205600	conserved Plasmodium protein, unknown function	Pf4500-4	0.142729
144-V05C	BSPZV1-144	2 wks post final dose	675000	Not Protected	PF3D7_1433800.iso1.exon1.amp1_seg1_2875	PF3D7_1433800.iso1.exon1.amp1_seg1	PF3D7_1433800	conserved Plasmodium protein, unknown function	Pf4000-5	-0.746301
144-V05C	BSPZV1-144	2 wks post final dose	675000	Not Protected	PF3D7_0911400.iso1.exon1.amp1_1087	PF3D7_0911400.iso1.exon1.amp1	PF3D7_0911400	conserved Plasmodium protein, unknown function	Pf4000-5	0.0992585
144-V05C	BSPZV1-144	2 wks post final dose	675000	Not Protected	PF3D7_0833000.iso1.exon3.amp1_3881	PF3D7_0833000.iso1.exon3.amp1	PF3D7_0833000	rifin	Pf4000-5	0.698565
144-V05C	BSPZV1-144	2 wks post final dose	675000	Not Protected	PF3D7_0302200.e2_6826	PF3D7_0302200.e2	PF3D7_0302200	cytoadherence linked asexual protein 3.2 (CLAG3.2)	Pf4500-4	0.305854
144-V05C	BSPZV1-144	2 wks post final dose	675000	Not Protected	PF3D7_0303100.iso1.exon1.amp1_4001	PF3D7_0303100.iso1.exon1.amp1	PF3D7_0303100	conserved Plasmodium protein, unknown function	Pf4000-5	-0.021542
144-V05C	BSPZV1-144	2 wks post final dose	675000	Not Protected	PF3D7_1300200.iso1.exon1.amp1_3602	PF3D7_1300200.iso1.exon1.amp1	PF3D7_1300200	rifin	Pf4000-5	1.6108
144-V05C	BSPZV1-144	2 wks post final dose	675000	Not Protected	PF3D7_0631900.iso1.exon2.amp1_3298	PF3D7_0631900.iso1.exon2.amp1	PF3D7_0631900	stevor	Pf4000-5	0.987872
144-V05C	BSPZV1-144	2 wks post final dose	675000	Not Protected	PF3D7_0904500.iso1.exon2.amp1_3514	PF3D7_0904500.iso1.exon2.amp1	PF3D7_0904500	prefoldin subunit, putative	Pf4000-5	0.121996
144-V05C	BSPZV1-144	2 wks post final dose	675000	Not Protected	PF3D7_0509700.e2s1_7449	PF3D7_0509700.e2s1	PF3D7_0509700	conserved Plasmodium protein, unknown function	Pf4500-4	-0.143873
144-V05C	BSPZV1-144	2 wks post final dose	675000	Not Protected	PF3D7_0407300.1o1_7856	PF3D7_0407300.1o1	PF3D7_0407300	transcription factor, putative	Pf4500-4	0.0667991
144-V05C	BSPZV1-144	2 wks post final dose	675000	Not Protected	PF3D7_0305800.iso1.exon1.amp1_1702	PF3D7_0305800.iso1.exon1.amp1	PF3D7_0305800	P-loop containing nucleoside triphospahte hydrolase, putative	Pf4000-5	0.0452159
144-V05C	BSPZV1-144	2 wks post final dose	675000	Not Protected	PF3D7_1200600.iso1.exon2.amp2_2516	PF3D7_1200600.iso1.exon2.amp2	PF3D7_1200600	erythrocyte membrane protein 1, PfEMP1	Pf4000-5	0.170299
144-V05C	BSPZV1-144	2 wks post final dose	675000	Not Protected	PF3D7_0723000.iso1.exon1.amp1_3306	PF3D7_0723000.iso1.exon1.amp1	PF3D7_0723000	tRNAHis guanylyltransferase, putative	Pf4000-5	0.60391
144-V05C	BSPZV1-144	2 wks post final dose	675000	Not Protected	PF3D7_0733000.iso1.exon2.amp3_1942	PF3D7_0733000.iso1.exon2.amp3	PF3D7_0733000	erythrocyte membrane protein 1, PfEMP1	Pf4000-5	0.695635
144-V05C	BSPZV1-144	2 wks post final dose	675000	Not Protected	PF3D7_1223600.e2s1_8263	PF3D7_1223600.e2s1	PF3D7_1223600	conserved Plasmodium protein, unknown function	Pf4500-4	1.03322
144-V05C	BSPZV1-144	2 wks post final dose	675000	Not Protected	PF3D7_1412500.e1s1_9197	PF3D7_1412500.e1s1	PF3D7_1412500	actin II (ACT2)	Pf4500-4	-0.147708
144-V05C	BSPZV1-144	2 wks post final dose	675000	Not Protected	PF3D7_1145800.1o1_4767	PF3D7_1145800.1o1	PF3D7_1145800	conserved Plasmodium protein, unknown function	Pf4500-4	0.154543
144-V05C	BSPZV1-144	2 wks post final dose	675000	Not Protected	PF3D7_1110900.iso1.exon1.amp1_736	PF3D7_1110900.iso1.exon1.amp1	PF3D7_1110900	conserved Plasmodium protein, unknown function	Pf4000-5	0.804949
144-V05C	BSPZV1-144	2 wks post final dose	675000	Not Protected	PF3D7_1475100.iso1.exon1.amp2_2780	PF3D7_1475100.iso1.exon1.amp2	PF3D7_1475100	conserved Plasmodium protein, unknown function	Pf4000-5	-0.071221
144-V05C	BSPZV1-144	2 wks post final dose	675000	Not Protected	PF3D7_1432700.iso1.exon2.amp1_1183	PF3D7_1432700.iso1.exon2.amp1	PF3D7_1432700	protein-L-isoaspartate O-methyltransferase beta-aspartate methyltransferase, putative	Pf4000-5	0.362262
144-V05C	BSPZV1-144	2 wks post final dose	675000	Not Protected	PF3D7_1032700_9125	PF3D7_1032700	PF3D7_1032700	conserved Plasmodium protein, unknown function	Pf4500-4	-0.913478
144-V05C	BSPZV1-144	2 wks post final dose	675000	Not Protected	PF3D7_0730200.4o4_9085	PF3D7_0730200.4o4	PF3D7_0730200	adapter-related protein, putative	Pf4500-4	-0.223034
144-V05C	BSPZV1-144	2 wks post final dose	675000	Not Protected	PF3D7_0319100.1o1_7545	PF3D7_0319100.1o1	PF3D7_0319100	ubiquitin-protein ligase, putative	Pf4500-4	0.444207
144-V05C	BSPZV1-144	2 wks post final dose	675000	Not Protected	PF3D7_1024400.1o2_7617	PF3D7_1024400.1o2	PF3D7_1024400	conserved Plasmodium protein, unknown function	Pf4500-4	1.57872
144-V05C	BSPZV1-144	2 wks post final dose	675000	Not Protected	PF3D7_0201500.2o2_5533	PF3D7_0201500.2o2	PF3D7_0201500	Plasmodium exported protein (hyp9), unknown function	Pf4500-4	0.333476
144-V05C	BSPZV1-144	2 wks post final dose	675000	Not Protected	PF3D7_0512100.iso1.exon2.amp1_3546	PF3D7_0512100.iso1.exon2.amp1	PF3D7_0512100	conserved Plasmodium protein, unknown function	Pf4000-5	-0.561106
144-V05C	BSPZV1-144	2 wks post final dose	675000	Not Protected	PF3D7_1419000.iso1.exon1.amp2_1926	PF3D7_1419000.iso1.exon1.amp2	PF3D7_1419000	conserved Plasmodium protein, unknown function	Pf4000-5	0.192125
144-V05C	BSPZV1-144	2 wks post final dose	675000	Not Protected	PF3D7_1123000.iso1.exon1.amp2_3426	PF3D7_1123000.iso1.exon1.amp2	PF3D7_1123000	conserved Plasmodium protein, unknown function	Pf4000-5	-0.282769
144-V05C	BSPZV1-144	2 wks post final dose	675000	Not Protected	PF3D7_0937500.iso1.exon1.amp1_4176	PF3D7_0937500.iso1.exon1.amp1	PF3D7_0937500	rifin	Pf4000-5	0.204893
144-V05C	BSPZV1-144	2 wks post final dose	675000	Not Protected	PF3D7_0922600.e1s1_5174	PF3D7_0922600.e1s1	PF3D7_0922600	glutamine synthetase, putative	Pf4500-4	0.312073
144-V05C	BSPZV1-144	2 wks post final dose	675000	Not Protected	PF3D7_1038600.2o2_8191	PF3D7_1038600.2o2	PF3D7_1038600	Plasmodium exported protein, unknown function	Pf4500-4	0.154543
144-V05C	BSPZV1-144	2 wks post final dose	675000	Not Protected	PF3D7_1302000.2o2_6994	PF3D7_1302000.2o2	PF3D7_1302000	Plasmodium exported protein, unknown function	Pf4500-4	0.303827
144-V05C	BSPZV1-144	2 wks post final dose	675000	Not Protected	PF3D7_0223500.iso1.exon1.amp1_3027	PF3D7_0223500.iso1.exon1.amp1	PF3D7_0223500	erythrocyte membrane protein 1, PfEMP1	Pf4000-5	0.110305
144-V05C	BSPZV1-144	2 wks post final dose	675000	Not Protected	PF3D7_1218200.e1s3_5661	PF3D7_1218200.e1s3	PF3D7_1218200	conserved Plasmodium protein, unknown function	Pf4500-4	-0.434751
144-V05C	BSPZV1-144	2 wks post final dose	675000	Not Protected	PF3D7_1206100.e2s1_6587	PF3D7_1206100.e2s1	PF3D7_1206100	IMP-specific 5'-nucleotidase, putative,haloacid dehalogenase hydrolase, putative	Pf4500-4	0.0592404
144-V05C	BSPZV1-144	2 wks post final dose	675000	Not Protected	PF3D7_0727700.e1s1_6228	PF3D7_0727700.e1s1	PF3D7_0727700	conserved Plasmodium protein, unknown function	Pf4500-4	-0.387631
144-V05C	BSPZV1-144	2 wks post final dose	675000	Not Protected	PF3D7_1420500.1o2_6515	PF3D7_1420500.1o2	PF3D7_1420500	conserved Plasmodium membrane protein, unknown function	Pf4500-4	-0.315155
144-V05C	BSPZV1-144	2 wks post final dose	675000	Not Protected	PF3D7_1225500.iso1.exon2.amp1_4408	PF3D7_1225500.iso1.exon2.amp1	PF3D7_1225500	small subunit rRNA processing factor, putative	Pf4000-5	0.303638
144-V05C	BSPZV1-144	2 wks post final dose	675000	Not Protected	PF3D7_1318700.iso1.exon1.amp1_2468	PF3D7_1318700.iso1.exon1.amp1	PF3D7_1318700	conserved Plasmodium protein, unknown function	Pf4000-5	0.450966
144-V05C	BSPZV1-144	2 wks post final dose	675000	Not Protected	PF3D7_0802400.1o3_8215	PF3D7_0802400.1o3	PF3D7_0802400	conserved Plasmodium protein, unknown function	Pf4500-4	-0.141109
144-V05C	BSPZV1-144	2 wks post final dose	675000	Not Protected	PF3D7_0411900.iso1.exon2.amp2_seg2_2021	PF3D7_0411900.iso1.exon2.amp2_seg2	PF3D7_0411900	DNA polymerase alpha	Pf4000-5	0.195587
144-V05C	BSPZV1-144	2 wks post final dose	675000	Not Protected	PF3D7_0822900_8008	PF3D7_0822900	PF3D7_0822900	conserved Plasmodium protein, unknown function	Pf4500-4	-0.333724
144-V05C	BSPZV1-144	2 wks post final dose	675000	Not Protected	PF3D7_0109900.iso2.exon7.amp1_3825	PF3D7_0109900.iso2.exon7.amp1	PF3D7_0109900	phosphatidate cytidylyltransferase, putative	Pf4000-5	0.126174
144-V05C	BSPZV1-144	2 wks post final dose	675000	Not Protected	PF3D7_0827700_6276	PF3D7_0827700	PF3D7_0827700	conserved Plasmodium membrane protein, unknown function	Pf4500-4	0.14691
144-V05C	BSPZV1-144	2 wks post final dose	675000	Not Protected	PF3D7_0527900.1o1_8790	PF3D7_0527900.1o1	PF3D7_0527900	RNA helicase 1	Pf4500-4	0.112051
144-V05C	BSPZV1-144	2 wks post final dose	675000	Not Protected	PF3D7_0302200.e9_5390	PF3D7_0302200.e9	PF3D7_0302200	cytoadherence linked asexual protein 3.2 (CLAG3.2)	Pf4500-4	0.442791
144-V05C	BSPZV1-144	2 wks post final dose	675000	Not Protected	PF3D7_1351300.2o2_5557	PF3D7_1351300.2o2	PF3D7_1351300	conserved Plasmodium membrane protein, unknown function	Pf4500-4	0.198172
144-V05C	BSPZV1-144	2 wks post final dose	675000	Not Protected	PF3D7_1028000.iso1.exon4.amp1_936	PF3D7_1028000.iso1.exon4.amp1	PF3D7_1028000	methyltransferase, putative	Pf4000-5	0.262308
144-V05C	BSPZV1-144	2 wks post final dose	675000	Not Protected	PF3D7_0107900.iso1.exon1.amp1_696	PF3D7_0107900.iso1.exon1.amp1	PF3D7_0107900	conserved Plasmodium protein, unknown function	Pf4000-5	-0.347293
144-V05C	BSPZV1-144	2 wks post final dose	675000	Not Protected	PF3D7_0414700.1o1_7337	PF3D7_0414700.1o1	PF3D7_0414700	GTP binding protein, putative	Pf4500-4	0.472243
144-V05C	BSPZV1-144	2 wks post final dose	675000	Not Protected	PF3D7_1359700.iso1.exon1.amp3_1966	PF3D7_1359700.iso1.exon1.amp3	PF3D7_1359700	conserved Plasmodium protein, unknown function	Pf4000-5	0.1269
144-V05C	BSPZV1-144	2 wks post final dose	675000	Not Protected	PF3D7_0908500.e17s1_8622	PF3D7_0908500.e17s1	PF3D7_0908500	conserved Plasmodium protein, unknown function	Pf4500-4	0.687717
144-V05C	BSPZV1-144	2 wks post final dose	675000	Not Protected	PF3D7_0114200.2o2_5845	PF3D7_0114200.2o2	PF3D7_0114200	Plasmodium exported protein (hyp4), unknown function	Pf4500-4	0.408233
144-V05C	BSPZV1-144	2 wks post final dose	675000	Not Protected	PF3D7_1232700.iso1.exon1.amp1_3259	PF3D7_1232700.iso1.exon1.amp1	PF3D7_1232700	conserved Plasmodium protein, unknown function	Pf4000-5	0.325132
144-V05C	BSPZV1-144	2 wks post final dose	675000	Not Protected	PF3D7_0412400.iso1.exon1.amp1_3330	PF3D7_0412400.iso1.exon1.amp1	PF3D7_0412400	erythrocyte membrane protein 1, PfEMP1	Pf4000-5	0.633054
144-V05C	BSPZV1-144	2 wks post final dose	675000	Not Protected	PF3D7_1362900.iso1.exon1.amp1_4264	PF3D7_1362900.iso1.exon1.amp1	PF3D7_1362900	conserved Plasmodium protein, unknown function	Pf4000-5	-1.15031
144-V05C	BSPZV1-144	2 wks post final dose	675000	Not Protected	PF3D7_1149500.4o4_6204	PF3D7_1149500.4o4	PF3D7_1149500	ring-infected erythrocyte surface antigen 2, pseudogene (RESA2)	Pf4500-4	-0.104828
144-V05C	BSPZV1-144	2 wks post final dose	675000	Not Protected	PF3D7_0931700.2o3_7353	PF3D7_0931700.2o3	PF3D7_0931700	conserved Plasmodium protein, unknown function	Pf4500-4	-0.161428
144-V05C	BSPZV1-144	2 wks post final dose	675000	Not Protected	PF3D7_0618900.2o10_5031	PF3D7_0618900.2o10	PF3D7_0618900	N-acetylglucosamine transferase (GPI1)	Pf4500-4	0.815339
144-V05C	BSPZV1-144	2 wks post final dose	675000	Not Protected	PF3D7_1328600.iso1.exon6.amp1_1223	PF3D7_1328600.iso1.exon6.amp1	PF3D7_1328600	conserved Plasmodium protein, unknown function	Pf4000-5	0.788767
144-V05C	BSPZV1-144	2 wks post final dose	675000	Not Protected	PF3D7_1241200.iso1.exon1.amp3_465	PF3D7_1241200.iso1.exon1.amp3	PF3D7_1241200	conserved Plasmodium protein, unknown function	Pf4000-5	-0.0546762
144-V05C	BSPZV1-144	2 wks post final dose	675000	Not Protected	PF3D7_1223000.iso1.exon2.amp1_2668	PF3D7_1223000.iso1.exon2.amp1	PF3D7_1223000	conserved Plasmodium protein, unknown function	Pf4000-5	0.347867
144-V05C	BSPZV1-144	2 wks post final dose	675000	Not Protected	PF3D7_0933000.iso1.exon1.amp1_2173	PF3D7_0933000.iso1.exon1.amp1	PF3D7_0933000	mRNA processing protein, putative	Pf4000-5	0.346466
144-V05C	BSPZV1-144	2 wks post final dose	675000	Not Protected	PF3D7_1325200.e3s1_6590	PF3D7_1325200.e3s1	PF3D7_1325200	oxidoreductase, putative	Pf4500-4	-0.220115
144-V05C	BSPZV1-144	2 wks post final dose	675000	Not Protected	PF3D7_0313100.1o4_8505	PF3D7_0313100.1o4	PF3D7_0313100	ubiquitin-protein ligase, putative (HRD3)	Pf4500-4	0.515189
144-V05C	BSPZV1-144	2 wks post final dose	675000	Not Protected	PF3D7_0107400_7713	PF3D7_0107400	PF3D7_0107400	conserved Plasmodium protein, unknown function	Pf4500-4	-0.447301
144-V05C	BSPZV1-144	2 wks post final dose	675000	Not Protected	PF3D7_0110700.e1s1_7186	PF3D7_0110700.e1s1	PF3D7_0110700	chromatin assembly factor 1 protein WD40 domain, putative	Pf4500-4	0.0906881
144-V05C	BSPZV1-144	2 wks post final dose	675000	Not Protected	PF3D7_0908500.e2s1_4815	PF3D7_0908500.e2s1	PF3D7_0908500	conserved Plasmodium protein, unknown function	Pf4500-4	0.0153257
144-V05C	BSPZV1-144	2 wks post final dose	675000	Not Protected	PF3D7_0530500.1o5_7377	PF3D7_0530500.1o5	PF3D7_0530500	conserved Plasmodium membrane protein, unknown function	Pf4500-4	-0.279186
144-V05C	BSPZV1-144	2 wks post final dose	675000	Not Protected	PF3D7_1476600.2o2_5629	PF3D7_1476600.2o2	PF3D7_1476600	Plasmodium exported protein, unknown function	Pf4500-4	-0.116472
144-V05C	BSPZV1-144	2 wks post final dose	675000	Not Protected	PF3D7_1444100.e10s1_5701	PF3D7_1444100.e10s1	PF3D7_1444100	conserved Plasmodium protein, unknown function	Pf4500-4	-0.336883
144-V05C	BSPZV1-144	2 wks post final dose	675000	Not Protected	PF3D7_1218000.1o1_4695	PF3D7_1218000.1o1	PF3D7_1218000	thrombospondin-related apical membrane protein (PTRAMP)	Pf4500-4	0.185695
144-V05C	BSPZV1-144	2 wks post final dose	675000	Not Protected	PF3D7_0921500.1o1_6156	PF3D7_0921500.1o1	PF3D7_0921500	conserved Plasmodium protein, unknown function	Pf4500-4	0.108125
144-V05C	BSPZV1-144	2 wks post final dose	675000	Not Protected	PF3D7_1341800.1o1_9053	PF3D7_1341800.1o1	PF3D7_1341800	conserved Plasmodium protein, unknown function	Pf4500-4	0.0814348
144-V05C	BSPZV1-144	2 wks post final dose	675000	Not Protected	PF3D7_0315000.iso1.exon2.amp1_1255	PF3D7_0315000.iso1.exon2.amp1	PF3D7_0315000	zinc finger protein, putative	Pf4000-5	-0.653067
144-V05C	BSPZV1-144	2 wks post final dose	675000	Not Protected	PF3D7_1130200_5980	PF3D7_1130200	PF3D7_1130200	60S ribosomal protein P0	Pf4500-4	2.41106
144-V05C	BSPZV1-144	2 wks post final dose	675000	Not Protected	PF3D7_0725000.iso1.exon1.amp1_250	PF3D7_0725000.iso1.exon1.amp1	PF3D7_0725000	exonuclease I, putative	Pf4000-5	0.285722
144-V05C	BSPZV1-144	2 wks post final dose	675000	Not Protected	PF3D7_0522600.1o1_6164	PF3D7_0522600.1o1	PF3D7_0522600	conserved protein, unknown function	Pf4500-4	0.0612723
144-V05C	BSPZV1-144	2 wks post final dose	675000	Not Protected	PF3D7_1249100.e2_8553	PF3D7_1249100.e2	PF3D7_1249100	conserved Plasmodium protein, unknown function	Pf4500-4	0.00134762
144-V05C	BSPZV1-144	2 wks post final dose	675000	Not Protected	PF3D7_0302200.1o9_6523	PF3D7_0302200.1o9	PF3D7_0302200	cytoadherence linked asexual protein 3.2 (CLAG3.2)	Pf4500-4	0.417924
144-V05C	BSPZV1-144	2 wks post final dose	675000	Not Protected	PF3D7_1450100.iso1.exon1.amp1_1303	PF3D7_1450100.iso1.exon1.amp1	PF3D7_1450100	signal recognition particle SRP54	Pf4000-5	0.475237
144-V05C	BSPZV1-144	2 wks post final dose	675000	Not Protected	PF3D7_0823300.e2s1_6012	PF3D7_0823300.e2s1	PF3D7_0823300	histone acetyltransferase GCN5 (GCN5)	Pf4500-4	-0.118562
144-V05C	BSPZV1-144	2 wks post final dose	675000	Not Protected	PF3D7_0910200.iso1.exon1.amp4_4504	PF3D7_0910200.iso1.exon1.amp4	PF3D7_0910200	conserved Plasmodium protein, unknown function	Pf4000-5	-0.000197941
144-V05C	BSPZV1-144	2 wks post final dose	675000	Not Protected	PF3D7_0632500.iso1.exon2.amp1_1064	PF3D7_0632500.iso1.exon2.amp1	PF3D7_0632500	erythrocyte membrane protein 1, PfEMP1	Pf4000-5	0.626143
144-V05C	BSPZV1-144	2 wks post final dose	675000	Not Protected	PF3D7_1456500.s2_4839	PF3D7_1456500.s2	PF3D7_1456500	conserved Plasmodium protein, unknown function	Pf4500-4	0.0785195
144-V05C	BSPZV1-144	2 wks post final dose	675000	Not Protected	PF3D7_0317100.e1_7992	PF3D7_0317100.e1	PF3D7_0317100	conserved Plasmodium protein, unknown function	Pf4500-4	0.219832
144-V05C	BSPZV1-144	2 wks post final dose	675000	Not Protected	PF3D7_1142700.1o1_9061	PF3D7_1142700.1o1	PF3D7_1142700	conserved protein, unknown function	Pf4500-4	-0.0785589
144-V05C	BSPZV1-144	2 wks post final dose	675000	Not Protected	PF3D7_1229500.e2s1_9205	PF3D7_1229500.e2s1	PF3D7_1229500	T-complex protein 1, gamma subunit, putative	Pf4500-4	-0.108145
144-V05C	BSPZV1-144	2 wks post final dose	675000	Not Protected	PF3D7_0406500.iso1.exon2.amp3_3666	PF3D7_0406500.iso1.exon2.amp3	PF3D7_0406500	conserved Plasmodium protein, unknown function	Pf4000-5	0.0631401
144-V05C	BSPZV1-144	2 wks post final dose	675000	Not Protected	PF3D7_1337100.4o8_6132	PF3D7_1337100.4o8	PF3D7_1337100	protein kinase 6 (PK6)	Pf4500-4	-0.126529
144-V05C	BSPZV1-144	2 wks post final dose	675000	Not Protected	PF3D7_1429700.iso1.exon1.amp1_3889	PF3D7_1429700.iso1.exon1.amp1	PF3D7_1429700	mitochondrial ribosomal protein L15 precursor, putative	Pf4000-5	0.283447
144-V05C	BSPZV1-144	2 wks post final dose	675000	Not Protected	PF3D7_1104600.e1s1_8359	PF3D7_1104600.e1s1	PF3D7_1104600	conserved Plasmodium protein, unknown function	Pf4500-4	-0.375587
144-V05C	BSPZV1-144	2 wks post final dose	675000	Not Protected	PF3D7_0518700.e1s1_5478	PF3D7_0518700.e1s1	PF3D7_0518700	mRNA-binding protein PUF1 (PUF1)	Pf4500-4	0.45647
144-V05C	BSPZV1-144	2 wks post final dose	675000	Not Protected	PF3D7_0502600.iso1.exon5.amp1_1319	PF3D7_0502600.iso1.exon5.amp1	PF3D7_0502600	conserved Plasmodium protein, unknown function	Pf4000-5	0.365954
144-V05C	BSPZV1-144	2 wks post final dose	675000	Not Protected	PF3D7_1234300.2o2_6755	PF3D7_1234300.2o2	PF3D7_1234300	DNA polymerase epsilon subunit b, putative	Pf4500-4	0.258341
144-V05C	BSPZV1-144	2 wks post final dose	675000	Not Protected	PF3D7_1349500.e1s4_5127	PF3D7_1349500.e1s4	PF3D7_1349500	conserved Plasmodium protein, unknown function	Pf4500-4	0.0636698
144-V05C	BSPZV1-144	2 wks post final dose	675000	Not Protected	PF3D7_0917300.1o1_6428	PF3D7_0917300.1o1	PF3D7_0917300	conserved Plasmodium membrane protein, unknown function	Pf4500-4	0.175158
144-V05C	BSPZV1-144	2 wks post final dose	675000	Not Protected	PF3D7_1106300.2o6_8231	PF3D7_1106300.2o6	PF3D7_1106300	exonuclease, putative	Pf4500-4	2.57946
144-V05C	BSPZV1-144	2 wks post final dose	675000	Not Protected	PF3D7_0618300.iso1.exon2.amp1_2405	PF3D7_0618300.iso1.exon2.amp1	PF3D7_0618300	60S ribosomal protein L27a, putative	Pf4000-5	-0.109369
144-V05C	BSPZV1-144	2 wks post final dose	675000	Not Protected	PF3D7_1246200_8287	PF3D7_1246200	PF3D7_1246200	actin I (ACT1)	Pf4500-4	0.0508984
144-V05C	BSPZV1-144	2 wks post final dose	675000	Not Protected	PF3D7_1369400.iso1.exon2.amp1_seg1_3458	PF3D7_1369400.iso1.exon2.amp1_seg1	PF3D7_1369400	conserved Plasmodium protein, unknown function	Pf4000-5	0.235316
144-V05C	BSPZV1-144	2 wks post final dose	675000	Not Protected	PF3D7_1110500.iso1.exon2.amp1_2828	PF3D7_1110500.iso1.exon2.amp1	PF3D7_1110500	vacuolar sorting protein 35, putative	Pf4000-5	0.36841
144-V05C	BSPZV1-144	2 wks post final dose	675000	Not Protected	PF3D7_1002600.1o1_6467	PF3D7_1002600.1o1	PF3D7_1002600	conserved Plasmodium protein, unknown function	Pf4500-4	0.0597948
144-V05C	BSPZV1-144	2 wks post final dose	675000	Not Protected	PF3D7_1246900.iso1.exon1.amp1_721	PF3D7_1246900.iso1.exon1.amp1	PF3D7_1246900	RAC-beta serine/threonine protein kinase	Pf4000-5	0.940587
144-V05C	BSPZV1-144	2 wks post final dose	675000	Not Protected	PF3D7_1480000.iso1.exon2.amp1_2445	PF3D7_1480000.iso1.exon2.amp1	PF3D7_1480000	rifin	Pf4000-5	0.64082
144-V05C	BSPZV1-144	2 wks post final dose	675000	Not Protected	PF3D7_1406900.1o5_6148	PF3D7_1406900.1o5	PF3D7_1406900	radical SAM protein, putative	Pf4500-4	-0.276618
144-V05C	BSPZV1-144	2 wks post final dose	675000	Not Protected	PF3D7_1024700.iso1.exon1.amp1_3043	PF3D7_1024700.iso1.exon1.amp1	PF3D7_1024700	conserved Plasmodium protein, unknown function	Pf4000-5	0.0659799
144-V05C	BSPZV1-144	2 wks post final dose	675000	Not Protected	PF3D7_0402000.e1s1_9149	PF3D7_0402000.e1s1	PF3D7_0402000	Plasmodium exported protein (PHISTa), unknown function	Pf4500-4	0.18874
144-V05C	BSPZV1-144	2 wks post final dose	675000	Not Protected	PF3D7_0816800.iso1.exon5.amp1_314	PF3D7_0816800.iso1.exon5.amp1	PF3D7_0816800	meiotic recombination protein dmc1-like protein	Pf4000-5	-0.274603
144-V05C	BSPZV1-144	2 wks post final dose	675000	Not Protected	PF3D7_0806600.e5s1_5749	PF3D7_0806600.e5s1	PF3D7_0806600	kinesin-like protein, putative	Pf4500-4	0.651762
144-V05C	BSPZV1-144	2 wks post final dose	675000	Not Protected	PF3D7_0705100.1o1_8239	PF3D7_0705100.1o1	PF3D7_0705100	conserved Plasmodium protein, unknown function	Pf4500-4	0.114366
144-V05C	BSPZV1-144	2 wks post final dose	675000	Not Protected	PF3D7_0932300.e1s1_4887	PF3D7_0932300.e1s1	PF3D7_0932300	M18 aspartyl aminopeptidase (M18AAP)	Pf4500-4	0.903227
144-V05C	BSPZV1-144	2 wks post final dose	675000	Not Protected	PF3D7_1360500.e13s1_6859	PF3D7_1360500.e13s1	PF3D7_1360500	guanylyl cyclase beta (GCbeta)	Pf4500-4	-0.0217329
144-V05C	BSPZV1-144	2 wks post final dose	675000	Not Protected	PF3D7_1244800.iso1.exon7.amp1_1511	PF3D7_1244800.iso1.exon7.amp1	PF3D7_1244800	cytoplasmic translation machinery associated protein, putative	Pf4000-5	0.195414
144-V05C	BSPZV1-144	2 wks post final dose	675000	Not Protected	PF3D7_0506800.e1_6284	PF3D7_0506800.e1	PF3D7_0506800	conserved Plasmodium protein, unknown function	Pf4500-4	0.219501
144-V05C	BSPZV1-144	2 wks post final dose	675000	Not Protected	PF3D7_1465800.e4s1_8838	PF3D7_1465800.e4s1	PF3D7_1465800	dynein beta chain, putative	Pf4500-4	-0.347136
144-V05C	BSPZV1-144	2 wks post final dose	675000	Not Protected	PF3D7_0728300.iso1.exon1.amp1_984	PF3D7_0728300.iso1.exon1.amp1	PF3D7_0728300	conserved Plasmodium protein, unknown function	Pf4000-5	0.21959
144-V05C	BSPZV1-144	2 wks post final dose	675000	Not Protected	PF3D7_1433100.iso1.exon4.amp1_1798	PF3D7_1433100.iso1.exon4.amp1	PF3D7_1433100	conserved Plasmodium membrane protein, unknown function	Pf4000-5	0.528778
144-V05C	BSPZV1-144	2 wks post final dose	675000	Not Protected	PF3D7_0508900.iso1.exon1.amp1_1678	PF3D7_0508900.iso1.exon1.amp1	PF3D7_0508900	conserved Plasmodium protein, unknown function	Pf4000-5	0.0648447
144-V05C	BSPZV1-144	2 wks post final dose	675000	Not Protected	PF3D7_0930400.iso1.exon6.amp1_50	PF3D7_0930400.iso1.exon6.amp1	PF3D7_0930400	conserved Plasmodium protein, unknown function	Pf4000-5	0.0214203
144-V05C	BSPZV1-144	2 wks post final dose	675000	Not Protected	PF3D7_0603800.15o20_7952	PF3D7_0603800.15o20	PF3D7_0603800	conserved Plasmodium protein, unknown function	Pf4500-4	0.176181
144-V05C	BSPZV1-144	2 wks post final dose	675000	Not Protected	PF3D7_0609300.iso1.exon1.amp1_745	PF3D7_0609300.iso1.exon1.amp1	PF3D7_0609300	conserved Plasmodium protein, unknown function	Pf4000-5	0.833116
144-V05C	BSPZV1-144	2 wks post final dose	675000	Not Protected	PF3D7_1200100.iso1.exon1.amp1_505	PF3D7_1200100.iso1.exon1.amp1	PF3D7_1200100	erythrocyte membrane protein 1, PfEMP1	Pf4000-5	0.514296
144-V05C	BSPZV1-144	2 wks post final dose	675000	Not Protected	PF3D7_0211400.6o8_7593	PF3D7_0211400.6o8	PF3D7_0211400	beta-ketoacyl-ACP synthase III (KASIII)	Pf4500-4	0.000577771
144-V05C	BSPZV1-144	2 wks post final dose	675000	Not Protected	PF3D7_0207100.s1_9173	PF3D7_0207100.s1	PF3D7_0207100	conserved Plasmodium protein, unknown function	Pf4500-4	0.136435
144-V05C	BSPZV1-144	2 wks post final dose	675000	Not Protected	PF3D7_0527000.1o2_8527	PF3D7_0527000.1o2	PF3D7_0527000	minchromosome maintenance (MCM) complex subunit, putative (MCM3)	Pf4500-4	-0.0822242
144-V05C	BSPZV1-144	2 wks post final dose	675000	Not Protected	PF3D7_0630500.1o1_9056	PF3D7_0630500.1o1	PF3D7_0630500	microtubule-associated protein ytm1 homologue, putative	Pf4500-4	-0.0176329
144-V05C	BSPZV1-144	2 wks post final dose	675000	Not Protected	PF3D7_1243300.iso1.exon2.amp1_short_4600	PF3D7_1243300.iso1.exon2.amp1_short	PF3D7_1243300	conserved Plasmodium protein, unknown function	Pf4000-5	-0.36274
144-V05C	BSPZV1-144	2 wks post final dose	675000	Not Protected	PF3D7_0623700.iso1.exon1.amp2_4528	PF3D7_0623700.iso1.exon1.amp2	PF3D7_0623700	ATP dependent DEAD-box helicase, putative	Pf4000-5	0.423329
144-V05C	BSPZV1-144	2 wks post final dose	675000	Not Protected	PF3D7_0511500.s3_7138	PF3D7_0511500.s3	PF3D7_0511500	RNA pseudouridylate synthase, putative	Pf4500-4	1.66961
144-V05C	BSPZV1-144	2 wks post final dose	675000	Not Protected	PF3D7_1440100.iso1.exon1.amp1_553	PF3D7_1440100.iso1.exon1.amp1	PF3D7_1440100	conserved Plasmodium protein, unknown function	Pf4000-5	1.26495
144-V05C	BSPZV1-144	2 wks post final dose	675000	Not Protected	PF3D7_1350700.1o1_5606	PF3D7_1350700.1o1	PF3D7_1350700	N6-adenine-specific methylase, putative	Pf4500-4	0.0572057
144-V05C	BSPZV1-144	2 wks post final dose	675000	Not Protected	PF3D7_1404200.iso1.exon1.amp1_2956	PF3D7_1404200.iso1.exon1.amp1	PF3D7_1404200	conserved Plasmodium protein, unknown function	Pf4000-5	0.690246
144-V05C	BSPZV1-144	2 wks post final dose	675000	Not Protected	PF3D7_1007300.iso1.exon1.amp1_3315	PF3D7_1007300.iso1.exon1.amp1	PF3D7_1007300	conserved Plasmodium protein, unknown function	Pf4000-5	1.91152
144-V05C	BSPZV1-144	2 wks post final dose	675000	Not Protected	PF3D7_1320200.1o1_8782	PF3D7_1320200.1o1	PF3D7_1320200	TBC domain protein, putative	Pf4500-4	0.263965
144-V05C	BSPZV1-144	2 wks post final dose	675000	Not Protected	PF3D7_0520300.e2s1_8862	PF3D7_0520300.e2s1	PF3D7_0520300	U6 snRNA-associated sm-like protein lsm2, putative (LSM2)	Pf4500-4	0.0385756
144-V05C	BSPZV1-144	2 wks post final dose	675000	Not Protected	PF3D7_0222600.iso1.exon2.amp1_1008	PF3D7_0222600.iso1.exon2.amp1	PF3D7_0222600	rifin	Pf4000-5	0.41667
144-V05C	BSPZV1-144	2 wks post final dose	675000	Not Protected	PF3D7_0414900.e4s1_5677	PF3D7_0414900.e4s1	PF3D7_0414900	conserved ARM repeats protein, unknown function	Pf4500-4	0.129058
144-V05C	BSPZV1-144	2 wks post final dose	675000	Not Protected	PF3D7_1421900.1o1_7840	PF3D7_1421900.1o1	PF3D7_1421900	Ctr copper transporter domain containing protein, putative	Pf4500-4	-0.227988
144-V05C	BSPZV1-144	2 wks post final dose	675000	Not Protected	PF3D7_1111200.1o2_7042	PF3D7_1111200.1o2	PF3D7_1111200	conserved Plasmodium protein, unknown function	Pf4500-4	0.0299243
144-V05C	BSPZV1-144	2 wks post final dose	675000	Not Protected	PF3D7_1300400.iso1.exon2.amp1_1295	PF3D7_1300400.iso1.exon2.amp1	PF3D7_1300400	rifin	Pf4000-5	1.15206
144-V05C	BSPZV1-144	2 wks post final dose	675000	Not Protected	PF3D7_0704600.iso1.exon5.amp4_2229	PF3D7_0704600.iso1.exon5.amp4	PF3D7_0704600	ubiquitin transferase, putative	Pf4000-5	0.334897
144-V05C	BSPZV1-144	2 wks post final dose	675000	Not Protected	PF3D7_1335700.2o3_7090	PF3D7_1335700.2o3	PF3D7_1335700	conserved Plasmodium protein, unknown function	Pf4500-4	0.549939
144-V05C	BSPZV1-144	2 wks post final dose	675000	Not Protected	PF3D7_1026300.e2s2_6539	PF3D7_1026300.e2s2	PF3D7_1026300	conserved Plasmodium protein, unknown function	Pf4500-4	-0.0846729
144-V05C	BSPZV1-144	2 wks post final dose	675000	Not Protected	PF3D7_0208300.iso1.exon1.amp2_1056	PF3D7_0208300.iso1.exon1.amp2	PF3D7_0208300	conserved Plasmodium protein, unknown function	Pf4000-5	0.483899
144-V05C	BSPZV1-144	2 wks post final dose	675000	Not Protected	PF3D7_1233600.e2s1_5965	PF3D7_1233600.e2s1	PF3D7_1233600	asparagine and aspartate rich protein 1 (AARP1)	Pf4500-4	0.195819
144-V05C	BSPZV1-144	2 wks post final dose	675000	Not Protected	PF3D7_0708600.iso1.exon1.amp1_3570	PF3D7_0708600.iso1.exon1.amp1	PF3D7_0708600	heat shock protein 86 family protein	Pf4000-5	-0.300947
144-V05C	BSPZV1-144	2 wks post final dose	675000	Not Protected	PF3D7_0723500_4823	PF3D7_0723500	PF3D7_0723500	dynactin 4, putative	Pf4500-4	0.125178
144-V05C	BSPZV1-144	2 wks post final dose	675000	Not Protected	PF3D7_0400400.iso1.exon2.amp2_3961	PF3D7_0400400.iso1.exon2.amp2	PF3D7_0400400	erythrocyte membrane protein 1, PfEMP1	Pf4000-5	0.391987
144-V05C	BSPZV1-144	2 wks post final dose	675000	Not Protected	PF3D7_0532300.e1s1_8311	PF3D7_0532300.e1s1	PF3D7_0532300	Plasmodium exported protein (PHISTb), unknown function	Pf4500-4	0.462073
144-V05C	BSPZV1-144	2 wks post final dose	675000	Not Protected	PF3D7_0322200.iso1.exon13.amp1_1878	PF3D7_0322200.iso1.exon13.amp1	PF3D7_0322200	conserved Plasmodium protein, unknown function	Pf4000-5	0.0627611
144-V05C	BSPZV1-144	2 wks post final dose	675000	Not Protected	PF3D7_1144600.iso1.exon1.amp1_3019	PF3D7_1144600.iso1.exon1.amp1	PF3D7_1144600	conserved Plasmodium protein, unknown function	Pf4000-5	0.585029
144-V05C	BSPZV1-144	2 wks post final dose	675000	Not Protected	PF3D7_0812800.iso1.exon1.amp1_3522	PF3D7_0812800.iso1.exon1.amp1	PF3D7_0812800	conserved Plasmodium protein, unknown function	Pf4000-5	-0.107448
144-V05C	BSPZV1-144	2 wks post final dose	675000	Not Protected	PF3D7_1453600.iso1.exon2.amp1_4552	PF3D7_1453600.iso1.exon2.amp1	PF3D7_1453600	RAP protein, putative	Pf4000-5	-0.510591
144-V05C	BSPZV1-144	2 wks post final dose	675000	Not Protected	PF3D7_1201400.iso1.exon1.amp1_218	PF3D7_1201400.iso1.exon1.amp1	PF3D7_1201400	Plasmodium exported protein, unknown function	Pf4000-5	3.0375
144-V05C	BSPZV1-144	2 wks post final dose	675000	Not Protected	PF3D7_0601500.iso1.exon1.amp1_4480	PF3D7_0601500.iso1.exon1.amp1	PF3D7_0601500	Plasmodium exported protein (PHISTb), unknown function	Pf4000-5	0.106816
144-V05C	BSPZV1-144	2 wks post final dose	675000	Not Protected	PF3D7_1401900.iso1.exon10.amp1_4073	PF3D7_1401900.iso1.exon10.amp1	PF3D7_1401900	conserved Plasmodium protein, unknown function	Pf4000-5	0.00848826
144-V05C	BSPZV1-144	2 wks post final dose	675000	Not Protected	PF3D7_0922900.3o5_5270	PF3D7_0922900.3o5	PF3D7_0922900	beta-ketoacyl-acyl carrier protein reductase (FabG)	Pf4500-4	-0.821094
144-V05C	BSPZV1-144	2 wks post final dose	675000	Not Protected	PF3D7_1034500.iso1.exon2.amp1_4560	PF3D7_1034500.iso1.exon2.amp1	PF3D7_1034500	conserved Plasmodium protein, unknown function	Pf4000-5	0.21993
144-V05C	BSPZV1-144	2 wks post final dose	675000	Not Protected	PF3D7_1418200.1o1_8407	PF3D7_1418200.1o1	PF3D7_1418200	conserved Plasmodium protein, unknown function	Pf4500-4	-0.151982
144-V05C	BSPZV1-144	2 wks post final dose	675000	Not Protected	PF3D7_1123400.e2_7114	PF3D7_1123400.e2	PF3D7_1123400	translation elongation factor EF-1, subunit alpha, putative	Pf4500-4	-0.79881
144-V05C	BSPZV1-144	2 wks post final dose	675000	Not Protected	PF3D7_0925300.1o1_6180	PF3D7_0925300.1o1	PF3D7_0925300	prolyl-t-RNA synthase, putative	Pf4500-4	0.536192
144-V05C	BSPZV1-144	2 wks post final dose	675000	Not Protected	PF3D7_0916400.iso1.exon1.amp3_1343	PF3D7_0916400.iso1.exon1.amp3	PF3D7_0916400	conserved Plasmodium protein, unknown function	Pf4000-5	0.212943
144-V05C	BSPZV1-144	2 wks post final dose	675000	Not Protected	PF3D7_0416400.iso1.exon2.amp1_1080	PF3D7_0416400.iso1.exon2.amp1	PF3D7_0416400	histone acetyltransferase, putative	Pf4000-5	0.646902
144-V05C	BSPZV1-144	2 wks post final dose	675000	Not Protected	PF3D7_1360200.iso1.exon6.amp1_370	PF3D7_1360200.iso1.exon6.amp1	PF3D7_1360200	conserved protein, unknown function	Pf4000-5	0.501207
144-V05C	BSPZV1-144	2 wks post final dose	675000	Not Protected	PF3D7_0823700.iso1.exon2.amp1_26	PF3D7_0823700.iso1.exon2.amp1	PF3D7_0823700	conserved Plasmodium protein, unknown function	Pf4000-5	-0.0348668
144-V05C	BSPZV1-144	2 wks post final dose	675000	Not Protected	PF3D7_0315200.iso1.exon1.amp2_537	PF3D7_0315200.iso1.exon1.amp2	PF3D7_0315200	circumsporozoite- and TRAP-related protein	Pf4000-5	0.248042
144-V05C	BSPZV1-144	2 wks post final dose	675000	Not Protected	PF3D7_0403900.iso1.exon2.amp2_1615	PF3D7_0403900.iso1.exon2.amp2	PF3D7_0403900	SET domain protein, putative	Pf4000-5	0.138277
144-V05C	BSPZV1-144	2 wks post final dose	675000	Not Protected	PF3D7_0530400.iso1.exon1.amp1_3722	PF3D7_0530400.iso1.exon1.amp1	PF3D7_0530400	conserved Plasmodium protein, unknown function	Pf4000-5	-0.0440229
144-V05C	BSPZV1-144	2 wks post final dose	675000	Not Protected	PF3D7_1138400.e1s4_8575	PF3D7_1138400.e1s4	PF3D7_1138400	guanylyl cyclase (GCalpha)	Pf4500-4	2.10951
144-V05C	BSPZV1-144	2 wks post final dose	675000	Not Protected	PF3D7_0821100.2o3_5055	PF3D7_0821100.2o3	PF3D7_0821100	protein kinase 1 (PK1)	Pf4500-4	0.126237
144-V05C	BSPZV1-144	2 wks post final dose	675000	Not Protected	PF3D7_0202500.1o1_7250	PF3D7_0202500.1o1	PF3D7_0202500	early transcribed membrane protein 2 (ETRAMP2)	Pf4500-4	0.0961036
144-V05C	BSPZV1-144	2 wks post final dose	675000	Not Protected	PF3D7_0200100.iso1.exon1.amp2_801	PF3D7_0200100.iso1.exon1.amp2	PF3D7_0200100	erythrocyte membrane protein 1, PfEMP1	Pf4000-5	0.2901
144-V05C	BSPZV1-144	2 wks post final dose	675000	Not Protected	PF3D7_0917000.iso1.exon1.amp1_1415	PF3D7_0917000.iso1.exon1.amp1	PF3D7_0917000	conserved Plasmodium protein, unknown function	Pf4000-5	0.542843
144-V05C	BSPZV1-144	2 wks post final dose	675000	Not Protected	PF3D7_0930200.iso1.exon2.amp1_394	PF3D7_0930200.iso1.exon2.amp1	PF3D7_0930200	leucine-rich repeat protein	Pf4000-5	-0.0571459
144-V05C	BSPZV1-144	2 wks post final dose	675000	Not Protected	PF3D7_0517000.iso1.exon1.amp1_1543	PF3D7_0517000.iso1.exon1.amp1	PF3D7_0517000	60S ribosomal protein L12, putative	Pf4000-5	-0.551209
144-V05C	BSPZV1-144	2 wks post final dose	675000	Not Protected	PF3D7_1428500.iso1.exon5.amp1_82	PF3D7_1428500.iso1.exon5.amp1	PF3D7_1428500	protein kinase, putative	Pf4000-5	-1.53936
144-V05C	BSPZV1-144	2 wks post final dose	675000	Not Protected	PF3D7_0417200.1o1_7904	PF3D7_0417200.1o1	PF3D7_0417200	bifunctional dihydrofolate reductase-thymidylate synthase (DHFR-TS)	Pf4500-4	0.152119
144-V05C	BSPZV1-144	2 wks post final dose	675000	Not Protected	PF3D7_1023100.e1s4_6236	PF3D7_1023100.e1s4	PF3D7_1023100	dynein heavy chain, putative	Pf4500-4	0.797942
144-V05C	BSPZV1-144	2 wks post final dose	675000	Not Protected	PF3D7_1421600.1o2_6188	PF3D7_1421600.1o2	PF3D7_1421600	conserved Plasmodium protein, unknown function	Pf4500-4	-0.128633
144-V05C	BSPZV1-144	2 wks post final dose	675000	Not Protected	PF3D7_0420900.iso1.exon2.amp2_793	PF3D7_0420900.iso1.exon2.amp2	PF3D7_0420900	erythrocyte membrane protein 1, PfEMP1	Pf4000-5	0.374379
144-V05C	BSPZV1-144	2 wks post final dose	675000	Not Protected	PF3D7_1401800.1o1_7880	PF3D7_1401800.1o1	PF3D7_1401800	choline kinase (CK)	Pf4500-4	0.212204
144-V05C	BSPZV1-144	2 wks post final dose	675000	Not Protected	PF3D7_0703100.1o1_5246	PF3D7_0703100.1o1	PF3D7_0703100	conserved Plasmodium protein, unknown function	Pf4500-4	2.57575
144-V05C	BSPZV1-144	2 wks post final dose	675000	Not Protected	PF3D7_0609400.iso1.exon1.amp1_2182	PF3D7_0609400.iso1.exon1.amp1	PF3D7_0609400	mitochondrial cardiolipin synthase, putative	Pf4000-5	0.161298
144-V05C	BSPZV1-144	2 wks post final dose	675000	Not Protected	PF3D7_0518000.iso1.exon3.amp1_2086	PF3D7_0518000.iso1.exon3.amp1	PF3D7_0518000	conserved protein, unknown function	Pf4000-5	0.253699
144-V05C	BSPZV1-144	2 wks post final dose	675000	Not Protected	PF3D7_0419900.iso1.exon3.amp5_seg1_2006	PF3D7_0419900.iso1.exon3.amp5_seg1	PF3D7_0419900	phosphatidylinositol 4-kinase, putative	Pf4000-5	1.87052
144-V05C	BSPZV1-144	2 wks post final dose	675000	Not Protected	PF3D7_1122800.e2_8559	PF3D7_1122800.e2	PF3D7_1122800	calcium dependent protein kinase 6 (CDPK6)	Pf4500-4	0.853358
144-V05C	BSPZV1-144	2 wks post final dose	675000	Not Protected	PF3D7_0409300.1o3_7378	PF3D7_0409300.1o3	PF3D7_0409300	conserved Plasmodium protein, unknown function	Pf4500-4	-0.0777456
144-V05C	BSPZV1-144	2 wks post final dose	675000	Not Protected	PF3D7_0322600.2o2_5366	PF3D7_0322600.2o2	PF3D7_0322600	conserved Plasmodium protein, unknown function	Pf4500-4	0.207208
144-V05C	BSPZV1-144	2 wks post final dose	675000	Not Protected	PF3D7_1346200.1o1_5534	PF3D7_1346200.1o1	PF3D7_1346200	mog1 homolog, putative	Pf4500-4	-0.377087
144-V05C	BSPZV1-144	2 wks post final dose	675000	Not Protected	PF3D7_1303800.e1s8_7426	PF3D7_1303800.e1s8	PF3D7_1303800	conserved Plasmodium protein, unknown function	Pf4500-4	-0.00366375
144-V05C	BSPZV1-144	2 wks post final dose	675000	Not Protected	PF3D7_1136000.iso1.exon2.amp4_seg1_266	PF3D7_1136000.iso1.exon2.amp4_seg1	PF3D7_1136000	conserved Plasmodium protein, unknown function	Pf4000-5	0.215162
144-V05C	BSPZV1-144	2 wks post final dose	675000	Not Protected	PF3D7_0831200.iso1.exon1.amp1_2190	PF3D7_0831200.iso1.exon1.amp1	PF3D7_0831200	DnaJ protein, putative	Pf4000-5	1.05973
144-V05C	BSPZV1-144	2 wks post final dose	675000	Not Protected	PF3D7_1316000.iso1.exon11.amp1_3235	PF3D7_1316000.iso1.exon11.amp1	PF3D7_1316000	protein kinase, putative	Pf4000-5	0.158108
144-V05C	BSPZV1-144	2 wks post final dose	675000	Not Protected	PF3D7_0204500.1o1_5582	PF3D7_0204500.1o1	PF3D7_0204500	aspartate aminotransferase,aspartate transaminase (AspAT)	Pf4500-4	0.14969
144-V05C	BSPZV1-144	2 wks post final dose	675000	Not Protected	PF3D7_1451100_7386	PF3D7_1451100	PF3D7_1451100	elongation factor 2	Pf4500-4	0.601495
144-V05C	BSPZV1-144	2 wks post final dose	675000	Not Protected	PF3D7_1432400.iso1.exon13.amp1_146	PF3D7_1432400.iso1.exon13.amp1	PF3D7_1432400	leucine-rich repeat protein	Pf4000-5	0.139176
144-V05C	BSPZV1-144	2 wks post final dose	675000	Not Protected	PF3D7_1237000.1o2_7641	PF3D7_1237000.1o2	PF3D7_1237000	ubiquitin-activating enzyme, putative (Uba2)	Pf4500-4	-0.235224
144-V05C	BSPZV1-144	2 wks post final dose	675000	Not Protected	PF3D7_0804000.iso1.exon1.amp1_4456	PF3D7_0804000.iso1.exon1.amp1	PF3D7_0804000	cactin homolog, putative	Pf4000-5	0.331911
144-V05C	BSPZV1-144	2 wks post final dose	675000	Not Protected	PF3D7_1431700.e3s1_7162	PF3D7_1431700.e3s1	PF3D7_1431700	60S ribosomal protein L14, putative	Pf4500-4	0.362677
144-V05C	BSPZV1-144	2 wks post final dose	675000	Not Protected	PF3D7_1428900.iso1.exon1.amp2_3642	PF3D7_1428900.iso1.exon1.amp2	PF3D7_1428900	conserved Plasmodium protein, unknown function	Pf4000-5	0.0637085
144-V05C	BSPZV1-144	2 wks post final dose	675000	Not Protected	PF3D7_1107000.iso1.exon3.amp1_1208	PF3D7_1107000.iso1.exon3.amp1	PF3D7_1107000	U6 snRNA-associated Sm-like protein LSm4, putative	Pf4000-5	-1.13806
144-V05C	BSPZV1-144	2 wks post final dose	675000	Not Protected	PF3D7_0400100.iso1.exon1.amp1_3682	PF3D7_0400100.iso1.exon1.amp1	PF3D7_0400100	erythrocyte membrane protein 1, PfEMP1	Pf4000-5	0.338972
144-V05C	BSPZV1-144	2 wks post final dose	675000	Not Protected	PF3D7_1329400.iso1.exon2.amp1_362	PF3D7_1329400.iso1.exon2.amp1	PF3D7_1329400	AMP deaminase, putative	Pf4000-5	-0.91822
144-V05C	BSPZV1-144	2 wks post final dose	675000	Not Protected	PF3D7_0513100.2o3_7569	PF3D7_0513100.2o3	PF3D7_0513100	conserved Plasmodium protein, unknown function	Pf4500-4	0.544799
144-V05C	BSPZV1-144	2 wks post final dose	675000	Not Protected	PF3D7_1311800.e1s2_5175	PF3D7_1311800.e1s2	PF3D7_1311800	M1-family alanyl aminopeptidase (M1AAP)	Pf4500-4	0.252532
144-V05C	BSPZV1-144	2 wks post final dose	675000	Not Protected	PF3D7_0500400.iso1.exon1.amp1_3882	PF3D7_0500400.iso1.exon1.amp1	PF3D7_0500400	rifin	Pf4000-5	1.35956
144-V05C	BSPZV1-144	2 wks post final dose	675000	Not Protected	PF3D7_1444100.e7s1_6923	PF3D7_1444100.e7s1	PF3D7_1444100	conserved Plasmodium protein, unknown function	Pf4500-4	2.17127
144-V05C	BSPZV1-144	2 wks post final dose	675000	Not Protected	PF3D7_1143200.2o2_6995	PF3D7_1143200.2o2	PF3D7_1143200	DnaJ protein, putative	Pf4500-4	0.066983
144-V05C	BSPZV1-144	2 wks post final dose	675000	Not Protected	PF3D7_1220700.iso1.exon1.amp1_1248	PF3D7_1220700.iso1.exon1.amp1	PF3D7_1220700	conserved Plasmodium protein, unknown function	Pf4000-5	-0.654624
144-V05C	BSPZV1-144	2 wks post final dose	675000	Not Protected	PF3D7_0833300.iso1.exon1.amp1_1870	PF3D7_0833300.iso1.exon1.amp1	PF3D7_0833300	erythrocyte membrane protein 1 (PfEMP1), exon2	Pf4000-5	3.13075
144-V05C	BSPZV1-144	2 wks post final dose	675000	Not Protected	PF3D7_0419600.e2s1_7473	PF3D7_0419600.e2s1	PF3D7_0419600	ran binding protein 1, putative	Pf4500-4	-0.18029
144-V05C	BSPZV1-144	2 wks post final dose	675000	Not Protected	PF3D7_0213900.iso1.exon1.amp1_1990	PF3D7_0213900.iso1.exon1.amp1	PF3D7_0213900	conserved Plasmodium protein, unknown function	Pf4000-5	0.539306
144-V05C	BSPZV1-144	2 wks post final dose	675000	Not Protected	PF3D7_1127900.3o3_6444	PF3D7_1127900.3o3	PF3D7_1127900	conserved Plasmodium protein, unknown function	Pf4500-4	0.508707
144-V05C	BSPZV1-144	2 wks post final dose	675000	Not Protected	PF3D7_0419800.1o1_5821	PF3D7_0419800.1o1	PF3D7_0419800	60S ribosomal protein L7ae/L30e, putative	Pf4500-4	0.139935
144-V05C	BSPZV1-144	2 wks post final dose	675000	Not Protected	PF3D7_1140400.1o2_5239	PF3D7_1140400.1o2	PF3D7_1140400	conserved Plasmodium protein, unknown function	Pf4500-4	-0.176585
144-V05C	BSPZV1-144	2 wks post final dose	675000	Not Protected	PF3D7_0521700.e1s1_9110	PF3D7_0521700.e1s1	PF3D7_0521700	DEAD/DEAH box ATP-dependent RNA helicase, putative	Pf4500-4	0.257374
144-V05C	BSPZV1-144	2 wks post final dose	675000	Not Protected	PF3D7_1122900.e1s1_9126	PF3D7_1122900.e1s1	PF3D7_1122900	dynein heavy chain, putative	Pf4500-4	-0.413049
144-V05C	BSPZV1-144	2 wks post final dose	675000	Not Protected	PF3D7_0808800.iso1.exon1.amp1_3594	PF3D7_0808800.iso1.exon1.amp1	PF3D7_0808800	rifin	Pf4000-5	0.551515
144-V05C	BSPZV1-144	2 wks post final dose	675000	Not Protected	PF3D7_0525600.1o2_8751	PF3D7_0525600.1o2	PF3D7_0525600	RNA methyltransferase, putative	Pf4500-4	0.00192474
144-V05C	BSPZV1-144	2 wks post final dose	675000	Not Protected	PF3D7_1373400.iso1.exon2.amp1_2732	PF3D7_1373400.iso1.exon2.amp1	PF3D7_1373400	rifin	Pf4000-5	0.986674
144-V05C	BSPZV1-144	2 wks post final dose	675000	Not Protected	PF3D7_0935900.e1s1_8599	PF3D7_0935900.e1s1	PF3D7_0935900	ring-exported protein 1 (REX1)	Pf4500-4	0.0776073
144-V05C	BSPZV1-144	2 wks post final dose	675000	Not Protected	PF3D7_0831500.iso1.exon3.amp1_1846	PF3D7_0831500.iso1.exon3.amp1	PF3D7_0831500	Plasmodium exported protein (PHIST), unknown function	Pf4000-5	0.150458
144-V05C	BSPZV1-144	2 wks post final dose	675000	Not Protected	PF3D7_1228800.e1s1_8000	PF3D7_1228800.e1s1	PF3D7_1228800	conserved Plasmodium protein, unknown function	Pf4500-4	0.10884
144-V05C	BSPZV1-144	2 wks post final dose	675000	Not Protected	PF3D7_1113000.iso1.exon7.amp5_1607	PF3D7_1113000.iso1.exon7.amp5	PF3D7_1113000	conserved Plasmodium protein, unknown function	Pf4000-5	0.319431
144-V05C	BSPZV1-144	2 wks post final dose	675000	Not Protected	PF3D7_1252100.e8s1_5486	PF3D7_1252100.e8s1	PF3D7_1252100	rhoptry neck protein 3 (RON3)	Pf4500-4	0.0438163
144-V05C	BSPZV1-144	2 wks post final dose	675000	Not Protected	PF3D7_1455300.e1s1_8647	PF3D7_1455300.e1s1	PF3D7_1455300	conserved Plasmodium protein, unknown function	Pf4500-4	-0.409207
144-V05C	BSPZV1-144	2 wks post final dose	675000	Not Protected	PF3D7_1006600.1o1_8120	PF3D7_1006600.1o1	PF3D7_1006600	thioredoxin, putative	Pf4500-4	-0.357708
144-V05C	BSPZV1-144	2 wks post final dose	675000	Not Protected	PF3D7_0528500.iso1.exon5.amp1_2948	PF3D7_0528500.iso1.exon5.amp1	PF3D7_0528500	f-actin capping protein alpha subunit, putative	Pf4000-5	0.0985191
144-V05C	BSPZV1-144	2 wks post final dose	675000	Not Protected	PF3D7_1219600.iso1.exon3.amp1_2541	PF3D7_1219600.iso1.exon3.amp1	PF3D7_1219600	aminophospholipid-transporting P-ATPase	Pf4000-5	0.410278
144-V05C	BSPZV1-144	2 wks post final dose	675000	Not Protected	PF3D7_0907200.e1s2_8934	PF3D7_0907200.e1s2	PF3D7_0907200	GTPase activator, putative	Pf4500-4	2.43277
144-V05C	BSPZV1-144	2 wks post final dose	675000	Not Protected	PF3D7_0811700.iso1.exon1.amp2_seg1_2589	PF3D7_0811700.iso1.exon1.amp2_seg1	PF3D7_0811700	conserved Plasmodium protein, unknown function	Pf4000-5	0.297368
144-V05C	BSPZV1-144	2 wks post final dose	675000	Not Protected	PF3D7_0507800.s2_4840	PF3D7_0507800.s2	PF3D7_0507800	conserved Plasmodium protein, unknown function	Pf4500-4	0.155062
144-V05C	BSPZV1-144	2 wks post final dose	675000	Not Protected	PF3D7_0109600.iso1.exon1.amp1_4121	PF3D7_0109600.iso1.exon1.amp1	PF3D7_0109600	cold-shock protein, putative	Pf4000-5	0.147422
144-V05C	BSPZV1-144	2 wks post final dose	675000	Not Protected	PF3D7_0712800.iso1.exon2.amp1_1655	PF3D7_0712800.iso1.exon2.amp1	PF3D7_0712800	erythrocyte membrane protein 1, PfEMP1	Pf4000-5	0.0707005
144-V05C	BSPZV1-144	2 wks post final dose	675000	Not Protected	PF3D7_1453200.iso1.exon11.amp1_2421	PF3D7_1453200.iso1.exon11.amp1	PF3D7_1453200	conserved Plasmodium protein, unknown function	Pf4000-5	0.344596
144-V05C	BSPZV1-144	2 wks post final dose	675000	Not Protected	PF3D7_1472400.iso1.exon2.amp1_4249	PF3D7_1472400.iso1.exon2.amp1	PF3D7_1472400	conserved Plasmodium membrane protein, unknown function	Pf4000-5	-0.699574
144-V05C	BSPZV1-144	2 wks post final dose	675000	Not Protected	PF3D7_0108300.s3_7689	PF3D7_0108300.s3	PF3D7_0108300	conserved Plasmodium protein, unknown function	Pf4500-4	2.37587
144-V05C	BSPZV1-144	2 wks post final dose	675000	Not Protected	PF3D7_1222600 (renamed, has duplicates)_6843	PF3D7_1222600 (renamed, has duplicates)	PF3D7_1222600	transcription factor with AP2 domain(s) (ApiAP2)	Pf4500-4	2.49014
144-V05C	BSPZV1-144	2 wks post final dose	675000	Not Protected	PF3D7_0936900.3o3_6707	PF3D7_0936900.3o3	PF3D7_0936900	Plasmodium exported protein (PHISTb), unknown function, pseudogene	Pf4500-4	0.318882
144-V05C	BSPZV1-144	2 wks post final dose	675000	Not Protected	PF3D7_1113500.1o1_8503	PF3D7_1113500.1o1	PF3D7_1113500	GTP binding protein, putative	Pf4500-4	0.528335
144-V05C	BSPZV1-144	2 wks post final dose	675000	Not Protected	PF3D7_0324800.iso1.exon2.amp1_2158	PF3D7_0324800.iso1.exon2.amp1	PF3D7_0324800	rifin	Pf4000-5	1.16254
144-V05C	BSPZV1-144	2 wks post final dose	675000	Not Protected	PF3D7_0221800.iso1.exon1.amp1_4385	PF3D7_0221800.iso1.exon1.amp1	PF3D7_0221800	hypothetical protein	Pf4000-5	-0.878732
144-V05C	BSPZV1-144	2 wks post final dose	675000	Not Protected	PF3D7_0616100.iso1.exon2.amp1_3547	PF3D7_0616100.iso1.exon2.amp1	PF3D7_0616100	conserved Plasmodium protein, unknown function	Pf4000-5	0.138277
144-V05C	BSPZV1-144	2 wks post final dose	675000	Not Protected	PF3D7_0723600.iso1.exon1.amp1_649	PF3D7_0723600.iso1.exon1.amp1	PF3D7_0723600	conserved Plasmodium protein, unknown function	Pf4000-5	-1.63144
144-V05C	BSPZV1-144	2 wks post final dose	675000	Not Protected	PF3D7_0824600.1o5_8431	PF3D7_0824600.1o5	PF3D7_0824600	anamorsin related protein, putative	Pf4500-4	0.26236
144-V05C	BSPZV1-144	2 wks post final dose	675000	Not Protected	PF3D7_1446600.e2s1_5103	PF3D7_1446600.e2s1	PF3D7_1446600	centrin-2 (CEN2)	Pf4500-4	0.259145
144-V05C	BSPZV1-144	2 wks post final dose	675000	Not Protected	PF3D7_0406000.1o1_8479	PF3D7_0406000.1o1	PF3D7_0406000	conserved Plasmodium protein, unknown function	Pf4500-4	-0.361167
144-V05C	BSPZV1-144	2 wks post final dose	675000	Not Protected	PF3D7_0814600.e1s1_5462	PF3D7_0814600.e1s1	PF3D7_0814600	conserved Plasmodium protein, unknown function	Pf4500-4	0.145169
144-V05C	BSPZV1-144	2 wks post final dose	675000	Not Protected	PF3D7_0619300.iso1.exon3.amp1_3092	PF3D7_0619300.iso1.exon3.amp1	PF3D7_0619300	conserved Plasmodium protein, unknown function	Pf4000-5	0.222138
144-V05C	BSPZV1-144	2 wks post final dose	675000	Not Protected	PF3D7_0726400.e2s1_7218	PF3D7_0726400.e2s1	PF3D7_0729900	conserved Plasmodium membrane protein, unknown function	Pf4500-4	0.138886
144-V05C	BSPZV1-144	2 wks post final dose	675000	Not Protected	PF3D7_1248800.iso1.exon1.amp1_960	PF3D7_1248800.iso1.exon1.amp1	PF3D7_1248800	conserved Plasmodium protein, unknown function	Pf4000-5	0.752561
144-V05C	BSPZV1-144	2 wks post final dose	675000	Not Protected	PF3D7_0909700.iso1.exon1.amp1_1703	PF3D7_0909700.iso1.exon1.amp1	PF3D7_0909700	FHA domain protein, putative	Pf4000-5	1.85692
144-V05C	BSPZV1-144	2 wks post final dose	675000	Not Protected	PF3D7_1150300.iso1.exon1.amp1_2740	PF3D7_1150300.iso1.exon1.amp1	PF3D7_1150300	rifin	Pf4000-5	0.163244
144-V05C	BSPZV1-144	2 wks post final dose	675000	Not Protected	PF3D7_0523900.3o3_7258	PF3D7_0523900.3o3	PF3D7_0523900	conserved Plasmodium membrane protein, unknown function	Pf4500-4	-0.216754
144-V05C	BSPZV1-144	2 wks post final dose	675000	Not Protected	PF3D7_0104500.1o1_8719	PF3D7_0104500.1o1	PF3D7_0104500	conserved Plasmodium protein, unknown function	Pf4500-4	-1.10815
144-V05C	BSPZV1-144	2 wks post final dose	675000	Not Protected	PF3D7_1305600.1o2_6412	PF3D7_1305600.1o2	PF3D7_1305600	membrane integral peptidase, M50 family, putative	Pf4500-4	-0.201614
144-V05C	BSPZV1-144	2 wks post final dose	675000	Not Protected	PF3D7_1036400.e2s2_6540	PF3D7_1036400.e2s2	PF3D7_1036400	liver stage antigen 1 (LSA1)	Pf4500-4	0.593858
144-V05C	BSPZV1-144	2 wks post final dose	675000	Not Protected	PF3D7_1100800.2o2_4959	PF3D7_1100800.2o2	PF3D7_1100800	Pfmc-2TM Maurer's cleft two transmembrane protein (MC-2TM)	Pf4500-4	0.042508
144-V05C	BSPZV1-144	2 wks post final dose	675000	Not Protected	PF3D7_1014200.2o2_6500	PF3D7_1014200.2o2	PF3D7_1014200	male gamete fusion factor HAP2, putative (HAP2)	Pf4500-4	0.450281
144-V05C	BSPZV1-144	2 wks post final dose	675000	Not Protected	PF3D7_0423400.1o1_7833	PF3D7_0423400.1o1	PF3D7_0423400	asparagine-rich protein (AARP)	Pf4500-4	0.272919
144-V05C	BSPZV1-144	2 wks post final dose	675000	Not Protected	PF3D7_0527500.e2_9142	PF3D7_0527500.e2	PF3D7_0527500	hsp70 interacting protein, putative	Pf4500-4	-0.0219284
144-V05C	BSPZV1-144	2 wks post final dose	675000	Not Protected	PF3D7_0408300.iso1.exon1.amp1_2134	PF3D7_0408300.iso1.exon1.amp1	PF3D7_0408300	zinc finger, RAN binding protein, putative	Pf4000-5	0.13016
144-V05C	BSPZV1-144	2 wks post final dose	675000	Not Protected	PF3D7_0628900.iso1.exon1.amp1_3954	PF3D7_0628900.iso1.exon1.amp1	PF3D7_0628900	RAP protein, putative	Pf4000-5	0.117988
144-V05C	BSPZV1-144	2 wks post final dose	675000	Not Protected	PF3D7_0519100.iso1.exon1.amp1_673	PF3D7_0519100.iso1.exon1.amp1	PF3D7_0519100	mitochondrial ribosomal protein L14 precursor, putative	Pf4000-5	0.507906
144-V05C	BSPZV1-144	2 wks post final dose	675000	Not Protected	PF3D7_0401400.iso1.exon2.amp1_1862	PF3D7_0401400.iso1.exon2.amp1	PF3D7_0401400	rifin	Pf4000-5	2.23153
144-V05C	BSPZV1-144	2 wks post final dose	675000	Not Protected	PF3D7_0821700.e1s1_9182	PF3D7_0821700.e1s1	PF3D7_0821700	60S ribosomal protein L22, putative	Pf4500-4	-0.21765
144-V05C	BSPZV1-144	2 wks post final dose	675000	Not Protected	PF3D7_1002700.1o1_4768	PF3D7_1002700.1o1	PF3D7_1002700	conserved Plasmodium protein, unknown function	Pf4500-4	0.281184
144-V05C	BSPZV1-144	2 wks post final dose	675000	Not Protected	PF3D7_0819000.4o5_6516	PF3D7_0819000.4o5	PF3D7_0819000	conserved Plasmodium protein, unknown function	Pf4500-4	-0.0744972
144-V05C	BSPZV1-144	2 wks post final dose	675000	Not Protected	PF3D7_1149100.iso2.exon1.amp1_4097	PF3D7_1149100.iso2.exon1.amp1	PF3D7_1149100	Plasmodium exported protein, unknown function	Pf4000-5	0.179419
144-V05C	BSPZV1-144	2 wks post final dose	675000	Not Protected	PF3D7_0903400.e1s3_8886	PF3D7_0903400.e1s3	PF3D7_0903400	DEAD/DEAH box helicase, putative	Pf4500-4	1.48344
144-V05C	BSPZV1-144	2 wks post final dose	675000	Not Protected	PF3D7_0203800.iso1.exon1.amp1_2349	PF3D7_0203800.iso1.exon1.amp1	PF3D7_0203800	conserved Plasmodium protein, unknown function	Pf4000-5	0.238005
144-V05C	BSPZV1-144	2 wks post final dose	675000	Not Protected	PF3D7_0411400.iso1.exon1.amp1_seg1_2876	PF3D7_0411400.iso1.exon1.amp1_seg1	PF3D7_0411400	DEAD box ATP-dependent RNA helicase, putative	Pf4000-5	0.248376
144-V05C	BSPZV1-144	2 wks post final dose	675000	Not Protected	PF3D7_0418900.1o5_6436	PF3D7_0418900.1o5	PF3D7_0418900	conserved Plasmodium protein, unknown function	Pf4500-4	0.126237
144-V05C	BSPZV1-144	2 wks post final dose	675000	Not Protected	PF3D7_0216900.1o1_7051	PF3D7_0216900.1o1	PF3D7_0216900	conserved Plasmodium protein, unknown function	Pf4500-4	0.737081
144-V05C	BSPZV1-144	2 wks post final dose	675000	Not Protected	PF3D7_1365800.iso1.exon4.amp1_2685	PF3D7_1365800.iso1.exon4.amp1	PF3D7_1365800	conserved Plasmodium protein, unknown function	Pf4000-5	0.465807
144-V05C	BSPZV1-144	2 wks post final dose	675000	Not Protected	PF3D7_1004000.e2s1_8910	PF3D7_1004000.e2s1	PF3D7_1004000	60S ribosomal protein L13, putative	Pf4500-4	0.237255
144-V05C	BSPZV1-144	2 wks post final dose	675000	Not Protected	PF3D7_1149500.e4_6252	PF3D7_1149500.e4	PF3D7_1149500	ring-infected erythrocyte surface antigen 2, pseudogene (RESA2)	Pf4500-4	0.0691875
144-V05C	BSPZV1-144	2 wks post final dose	675000	Not Protected	PF3D7_0705200.iso1.exon1.amp1_seg1_4026	PF3D7_0705200.iso1.exon1.amp1_seg1	PF3D7_0705200	conserved Plasmodium protein, unknown function	Pf4000-5	0.590298
144-V05C	BSPZV1-144	2 wks post final dose	675000	Not Protected	PF3D7_0609600.iso1.exon1.amp1_1663	PF3D7_0609600.iso1.exon1.amp1	PF3D7_0609600	probable protein, unknown function	Pf4000-5	0.105161
144-V05C	BSPZV1-144	2 wks post final dose	675000	Not Protected	PF3D7_1353300.iso1.exon1.amp3_4512	PF3D7_1353300.iso1.exon1.amp3	PF3D7_1353300	conserved Plasmodium protein, unknown function	Pf4000-5	1.51374
144-V05C	BSPZV1-144	2 wks post final dose	675000	Not Protected	PF3D7_0605900.1o5_7865	PF3D7_0605900.1o5	PF3D7_0605900	long chain polyunsaturated fatty acid elongation enzyme, putative	Pf4500-4	0.0533133
144-V05C	BSPZV1-144	2 wks post final dose	675000	Not Protected	PF3D7_1030100.iso1.exon1.amp1_4193	PF3D7_1030100.iso1.exon1.amp1	PF3D7_1030100	pre-mRNA-splicing factor ATP-dependent RNA helicase PRP22, putative	Pf4000-5	0.118717
144-V05C	BSPZV1-144	2 wks post final dose	675000	Not Protected	PF3D7_0115700.iso1.exon1.amp1_1583	PF3D7_0115700.iso1.exon1.amp1	PF3D7_0115700	erythrocyte membrane protein 1, PfEMP1	Pf4000-5	0.556908
144-V05C	BSPZV1-144	2 wks post final dose	675000	Not Protected	PF3D7_0613300.iso1.exon5.amp1_2341	PF3D7_0613300.iso1.exon5.amp1	PF3D7_0613300	integral membrane protein, putative	Pf4000-5	0.233297
144-V05C	BSPZV1-144	2 wks post final dose	675000	Not Protected	PF3D7_0422300.e3s1_6907	PF3D7_0422300.e3s1	PF3D7_0422300	alpha tubulin 2	Pf4500-4	0.325045
144-V05C	BSPZV1-144	2 wks post final dose	675000	Not Protected	PF3D7_1423700.e1s1_5199	PF3D7_1423700.e1s1	PF3D7_1423700	conserved Plasmodium protein, unknown function	Pf4500-4	0.905696
144-V05C	BSPZV1-144	2 wks post final dose	675000	Not Protected	PF3D7_1440200.3o6_8240	PF3D7_1440200.3o6	PF3D7_1440200	stromal-processing peptidase, putative (SPP)	Pf4500-4	0.0310557
144-V05C	BSPZV1-144	2 wks post final dose	675000	Not Protected	PF3D7_0711400.iso1.exon1.amp1_1016	PF3D7_0711400.iso1.exon1.amp1	PF3D7_0711400	sin3 associated polypeptide p18-like protein	Pf4000-5	-0.257935
144-V05C	BSPZV1-144	2 wks post final dose	675000	Not Protected	PF3D7_1236400.iso1.exon3.amp1_3267	PF3D7_1236400.iso1.exon3.amp1	PF3D7_1236400	conserved Plasmodium protein, unknown function	Pf4000-5	0.0425271
144-V05C	BSPZV1-144	2 wks post final dose	675000	Not Protected	PF3D7_1119100.iso1.exon1.amp1_3874	PF3D7_1119100.iso1.exon1.amp1	PF3D7_1119100	tRNA m(1)G methyltransferase, putative	Pf4000-5	0.138097
144-V05C	BSPZV1-144	2 wks post final dose	675000	Not Protected	PF3D7_1331600.iso1.exon2.amp1_346	PF3D7_1331600.iso1.exon2.amp1	PF3D7_1331600	protein tyrosine phosphatase, putative	Pf4000-5	0.182562
144-V05C	BSPZV1-144	2 wks post final dose	675000	Not Protected	PF3D7_0807500.e3s1_8024	PF3D7_0807500.e3s1	PF3D7_0807500	proteasome subunit alpha, putative	Pf4500-4	-0.694769
144-V05C	BSPZV1-144	2 wks post final dose	675000	Not Protected	PF3D7_1106800.iso1.exon1.amp1_1368	PF3D7_1106800.iso1.exon1.amp1	PF3D7_1106800	protein kinase, putative	Pf4000-5	0.29495
144-V05C	BSPZV1-144	2 wks post final dose	675000	Not Protected	PF3D7_1360000.1o1_6396	PF3D7_1360000.1o1	PF3D7_1360000	conserved Plasmodium protein, unknown function	Pf4500-4	-0.0961554
144-V05C	BSPZV1-144	2 wks post final dose	675000	Not Protected	PF3D7_0610800.1o1_6189	PF3D7_0610800.1o1	PF3D7_0610800	transketolase (TK)	Pf4500-4	0.0901454
144-V05C	BSPZV1-144	2 wks post final dose	675000	Not Protected	PF3D7_0405900.e3s1_6875	PF3D7_0405900.e3s1	PF3D7_0405900	apical sushi protein (ASP)	Pf4500-4	1.73338
144-V05C	BSPZV1-144	2 wks post final dose	675000	Not Protected	PF3D7_0112100.1o1_6684	PF3D7_0112100.1o1	PF3D7_0112100	conserved Plasmodium protein, unknown function	Pf4500-4	0.66761
144-V05C	BSPZV1-144	2 wks post final dose	675000	Not Protected	PF3D7_1331400.e1s1_8048	PF3D7_1331400.e1s1	PF3D7_1331400	CPW-WPC family protein	Pf4500-4	-0.400792
144-V05C	BSPZV1-144	2 wks post final dose	675000	Not Protected	PF3D7_1324400.iso1.exon3.amp1_322	PF3D7_1324400.iso1.exon3.amp1	PF3D7_1324400	MSF1-like protein, putative	Pf4000-5	0.163951
144-V05C	BSPZV1-144	2 wks post final dose	675000	Not Protected	PF3D7_1020900.e4s1_7993	PF3D7_1020900.e4s1	PF3D7_1020900	ADP-ribosylation factor (ARF1)	Pf4500-4	0.212038
144-V05C	BSPZV1-144	2 wks post final dose	675000	Not Protected	PF3D7_0826100.s1_5414	PF3D7_0826100.s1	PF3D7_0826100	E3 ubiquitin-protein ligase, putative	Pf4500-4	0.480549
144-V05C	BSPZV1-144	2 wks post final dose	675000	Not Protected	PF3D7_1011900.iso1.exon4.amp1_2357	PF3D7_1011900.iso1.exon4.amp1	PF3D7_1011900	heme oxygenase	Pf4000-5	0.218739
144-V05C	BSPZV1-144	2 wks post final dose	675000	Not Protected	PF3D7_1144900.4o4_6971	PF3D7_1144900.4o4	PF3D7_1144900	Rab GTPase 6 (RAB6)	Pf4500-4	-0.618868
144-V05C	BSPZV1-144	2 wks post final dose	675000	Not Protected	PF3D7_1213900.iso1.exon2.amp1_3978	PF3D7_1213900.iso1.exon2.amp1	PF3D7_1213900	conserved Plasmodium protein, unknown function	Pf4000-5	0.076908
144-V05C	BSPZV1-144	2 wks post final dose	675000	Not Protected	PF3D7_0724800.e1_8264	PF3D7_0724800.e1	PF3D7_0724800	kelch protein, putative	Pf4500-4	-0.804181
144-V05C	BSPZV1-144	2 wks post final dose	675000	Not Protected	PF3D7_1146700.iso1.exon1.amp1_3331	PF3D7_1146700.iso1.exon1.amp1	PF3D7_1146700	kinesin-like protein, putative	Pf4000-5	0.111772
144-V05C	BSPZV1-144	2 wks post final dose	675000	Not Protected	PF3D7_0602700.iso1.exon1.amp1_1591	PF3D7_0602700.iso1.exon1.amp1	PF3D7_0602700	conserved Plasmodium protein, unknown function	Pf4000-5	0.453426
144-V05C	BSPZV1-144	2 wks post final dose	675000	Not Protected	PF3D7_1117200.iso1.exon2.amp1_1104	PF3D7_1117200.iso1.exon2.amp1	PF3D7_1117200	conserved Plasmodium protein, unknown function	Pf4000-5	0.535623
144-V05C	BSPZV1-144	2 wks post final dose	675000	Not Protected	PF3D7_0104700.1o1_4752	PF3D7_0104700.1o1	PF3D7_0104700	transporter, putative	Pf4500-4	-0.325013
144-V05C	BSPZV1-144	2 wks post final dose	675000	Not Protected	PF3D7_1225300.iso1.exon1.amp1_985	PF3D7_1225300.iso1.exon1.amp1	PF3D7_1225300	conserved Plasmodium protein, unknown function	Pf4000-5	1.85731
144-V05C	BSPZV1-144	2 wks post final dose	675000	Not Protected	PF3D7_0828400.1o1_8192	PF3D7_0828400.1o1	PF3D7_0828400	mitochondrial inner membrane protein, putative (Oxa1)	Pf4500-4	2.31711
144-V05C	BSPZV1-144	2 wks post final dose	675000	Not Protected	PF3D7_0405700.iso1.exon1.amp2_seg1_3164	PF3D7_0405700.iso1.exon1.amp2_seg1	PF3D7_0405700	lysine decarboxylase, putative	Pf4000-5	0.0540151
144-V05C	BSPZV1-144	2 wks post final dose	675000	Not Protected	PF3D7_0603500.1o1_7019	PF3D7_0603500.1o1	PF3D7_0603500	cation/H antiporter (CHA)	Pf4500-4	0.0816168
144-V05C	BSPZV1-144	2 wks post final dose	675000	Not Protected	PF3D7_1361000.1o1_7354	PF3D7_1361000.1o1	PF3D7_1361000	arginine methyltransferase 5, putative (PRMT5)	Pf4500-4	0.0402622
144-V05C	BSPZV1-144	2 wks post final dose	675000	Not Protected	PF3D7_1359000.iso1.exon1.amp2_seg1_1152	PF3D7_1359000.iso1.exon1.amp2_seg1	PF3D7_1359000	conserved Plasmodium protein, unknown function	Pf4000-5	0.43304
144-V05C	BSPZV1-144	2 wks post final dose	675000	Not Protected	PF3D7_1323800.iso1.exon1.amp2_seg2_2014	PF3D7_1323800.iso1.exon1.amp2_seg2	PF3D7_1323800	vacuolar protein sorting 52 homologue	Pf4000-5	0.455882
144-V05C	BSPZV1-144	2 wks post final dose	675000	Not Protected	PF3D7_0924000.iso1.exon2.amp1_2373	PF3D7_0924000.iso1.exon2.amp1	PF3D7_0924000	patatin-like phospholipase, putative	Pf4000-5	0.256354
144-V05C	BSPZV1-144	2 wks post final dose	675000	Not Protected	PF3D7_1133900.iso1.exon2.amp2_3355	PF3D7_1133900.iso1.exon2.amp2	PF3D7_1133900	conserved Plasmodium protein, unknown function	Pf4000-5	0.161475
144-V05C	BSPZV1-144	2 wks post final dose	675000	Not Protected	PF3D7_1229000.iso1.exon1.amp2_2206	PF3D7_1229000.iso1.exon1.amp2	PF3D7_1229000	conserved Plasmodium membrane protein, unknown function	Pf4000-5	-0.011928
144-V05C	BSPZV1-144	2 wks post final dose	675000	Not Protected	PF3D7_0115000.e2s1_5438	PF3D7_0115000.e2s1	PF3D7_0115000	surface-associated interspersed protein 1.3 (SURFIN 1.3) (SURF1.3)	Pf4500-4	0.372678
144-V05C	BSPZV1-144	2 wks post final dose	675000	Not Protected	PF3D7_0726400.e2s3_8958	PF3D7_0726400.e2s3	PF3D7_0729900	conserved Plasmodium membrane protein, unknown function	Pf4500-4	0.3195
144-V05C	BSPZV1-144	2 wks post final dose	675000	Not Protected	PF3D7_1468000.e10_7115	PF3D7_1468000.e10	PF3D7_1468000	conserved Plasmodium protein, unknown function	Pf4500-4	-0.615029
144-V05C	BSPZV1-144	2 wks post final dose	675000	Not Protected	PF3D7_0413500.1o1_6420	PF3D7_0413500.1o1	PF3D7_0413500	phosphoglucomutase-2 (PGM2)	Pf4500-4	-0.598021
144-V05C	BSPZV1-144	2 wks post final dose	675000	Not Protected	PF3D7_1409400.1o1_7546	PF3D7_1409400.1o1	PF3D7_1409400	conserved Plasmodium membrane protein, unknown function	Pf4500-4	0.349133
144-V05C	BSPZV1-144	2 wks post final dose	675000	Not Protected	PF3D7_0219100.iso1.exon1.amp1_3028	PF3D7_0219100.iso1.exon1.amp1	PF3D7_0219100	conserved protein, unknown function	Pf4000-5	-0.0693502
144-V05C	BSPZV1-144	2 wks post final dose	675000	Not Protected	PF3D7_1441100.1o1_6109	PF3D7_1441100.1o1	PF3D7_1441100	conserved Plasmodium protein, unknown function	Pf4500-4	-0.0455861
144-V05C	BSPZV1-144	2 wks post final dose	675000	Not Protected	PF3D7_1015800.4o5_5255	PF3D7_1015800.4o5	PF3D7_1015800	ribonucleotide reductase small subunit, putative	Pf4500-4	0.00557446
144-V05C	BSPZV1-144	2 wks post final dose	675000	Not Protected	PF3D7_1308400.e2s1_8360	PF3D7_1308400.e2s1	PF3D7_1308400	conserved Plasmodium protein, unknown function	Pf4500-4	0.267489
144-V05C	BSPZV1-144	2 wks post final dose	675000	Not Protected	PF3D7_1305400.iso1.exon2.amp1_2469	PF3D7_1305400.iso1.exon2.amp1	PF3D7_1305400	conserved Plasmodium protein, unknown function	Pf4000-5	0.496163
144-V05C	BSPZV1-144	2 wks post final dose	675000	Not Protected	PF3D7_1329000.e2s1_7769	PF3D7_1329000.e2s1	PF3D7_1329000	DNA-directed RNA polymerase 3 largest subunit	Pf4500-4	0.558203
144-V05C	BSPZV1-144	2 wks post final dose	675000	Not Protected	PF3D7_0926300.iso1.exon2.amp1_35	PF3D7_0926300.iso1.exon2.amp1	PF3D7_0926300	protein kinase, putative	Pf4000-5	0.367182
144-V05C	BSPZV1-144	2 wks post final dose	675000	Not Protected	PF3D7_1439700.6o6_6716	PF3D7_1439700.6o6	PF3D7_1439700	leucine carboxyl methyltransferase, putative	Pf4500-4	0.0212208
144-V05C	BSPZV1-144	2 wks post final dose	675000	Not Protected	PF3D7_0918200.iso1.exon5.amp1_1823	PF3D7_0918200.iso1.exon5.amp1	PF3D7_0918200	organelle ribosomal protein L3 precursor, putative	Pf4000-5	-0.681362
144-V05C	BSPZV1-144	2 wks post final dose	675000	Not Protected	PF3D7_1023100.e1s6_5941	PF3D7_1023100.e1s6	PF3D7_1023100	dynein heavy chain, putative	Pf4500-4	2.97822
144-V05C	BSPZV1-144	2 wks post final dose	675000	Not Protected	PF3D7_0204900.iso1.exon2.amp1_4169	PF3D7_0204900.iso1.exon2.amp1	PF3D7_0204900	ubiE/COQ5 methyltransferase, putative	Pf4000-5	0.784635
144-V05C	BSPZV1-144	2 wks post final dose	675000	Not Protected	PF3D7_1401600.e3s1_6324	PF3D7_1401600.e3s1	PF3D7_1401600	Plasmodium exported protein (PHISTb), unknown function	Pf4500-4	0.232673
144-V05C	BSPZV1-144	2 wks post final dose	675000	Not Protected	PF3D7_0402400.2o2_4672	PF3D7_0402400.2o2	PF3D7_0402400	Plasmodium exported protein, unknown function (GEXP18)	Pf4500-4	0.412435
144-V05C	BSPZV1-144	2 wks post final dose	675000	Not Protected	PF3D7_0208100.iso2.exon16.amp1_2517	PF3D7_0208100.iso2.exon16.amp1	PF3D7_0208100	conserved Plasmodium protein, unknown function	Pf4000-5	0.00848826
144-V05C	BSPZV1-144	2 wks post final dose	675000	Not Protected	PF3D7_1215900.1o1_5893	PF3D7_1215900.1o1	PF3D7_1215900	conserved Plasmodium membrane protein, unknown function (PfSR10)	Pf4500-4	0.298356
144-V05C	BSPZV1-144	2 wks post final dose	675000	Not Protected	PF3D7_1024900.iso1.exon1.amp2_3930	PF3D7_1024900.iso1.exon1.amp2	PF3D7_1024900	conserved Plasmodium protein, unknown function	Pf4000-5	0.259169
144-V05C	BSPZV1-144	2 wks post final dose	675000	Not Protected	PF3D7_1343800.iso1.exon1.amp4_1088	PF3D7_1343800.iso1.exon1.amp4	PF3D7_1343800	conserved Plasmodium protein, unknown function	Pf4000-5	0.0799082
144-V05C	BSPZV1-144	2 wks post final dose	675000	Not Protected	PF3D7_1028000.iso1.exon2.amp1_1224	PF3D7_1028000.iso1.exon2.amp1	PF3D7_1028000	methyltransferase, putative	Pf4000-5	0.351285
144-V05C	BSPZV1-144	2 wks post final dose	675000	Not Protected	PF3D7_0630700.iso1.exon1.amp1_1304	PF3D7_0630700.iso1.exon1.amp1	PF3D7_0630700	conserved Plasmodium protein, unknown function	Pf4000-5	-0.0239556
144-V05C	BSPZV1-144	2 wks post final dose	675000	Not Protected	PF3D7_1027600.iso1.exon1.amp1_2118	PF3D7_1027600.iso1.exon1.amp1	PF3D7_1027600	topoisomerase, putative	Pf4000-5	0.0384846
144-V05C	BSPZV1-144	2 wks post final dose	675000	Not Protected	PF3D7_1433500.e1s1_5191	PF3D7_1433500.e1s1	PF3D7_1433500	DNA topoisomerase II, putative	Pf4500-4	-0.0207557
144-V05C	BSPZV1-144	2 wks post final dose	675000	Not Protected	PF3D7_0316300.1.e3_6827	PF3D7_0316300.1.e3	PF3D7_0316300.1	inorganic pyrophosphatase, putative	Pf4500-4	1.24459
144-V05C	BSPZV1-144	2 wks post final dose	675000	Not Protected	PF3D7_1121900.1o1_7330	PF3D7_1121900.1o1	PF3D7_1121900	serine/threonine protein kinase, putative	Pf4500-4	-0.128844
144-V05C	BSPZV1-144	2 wks post final dose	675000	Not Protected	PF3D7_1435300.e1s2_7506	PF3D7_1435300.e1s2	PF3D7_1435300	NAD(P)H-dependent glutamate synthase, putative	Pf4500-4	1.52339
144-V05C	BSPZV1-144	2 wks post final dose	675000	Not Protected	PF3D7_1129200.2o4_7594	PF3D7_1129200.2o4	PF3D7_1129200	26S proteasome regulatory subunit, putative	Pf4500-4	-0.0133502
144-V05C	BSPZV1-144	2 wks post final dose	675000	Not Protected	PF3D7_1238800.e1s1_6061	PF3D7_1238800.e1s1	PF3D7_1238800	acyl-CoA synthetase, PfACS11 (ACS11)	Pf4500-4	1.41807
144-V05C	BSPZV1-144	2 wks post final dose	675000	Not Protected	PF3D7_0919600.1o1_9054	PF3D7_0919600.1o1	PF3D7_0919600	dolichyl-diphosphooligosaccharide-protein glycosyltransferase, putative	Pf4500-4	0.204537
144-V05C	BSPZV1-144	2 wks post final dose	675000	Not Protected	PF3D7_0103400.e1s1_5925	PF3D7_0103400.e1s1	PF3D7_0103400	zinc-carboxypeptidase, putative	Pf4500-4	0.0739525
144-V05C	BSPZV1-144	2 wks post final dose	675000	Not Protected	PF3D7_0924100.iso1.exon1.amp1_2461	PF3D7_0924100.iso1.exon1.amp1	PF3D7_0924100	conserved Plasmodium protein, unknown function	Pf4000-5	0.169947
144-V05C	BSPZV1-144	2 wks post final dose	675000	Not Protected	PF3D7_1460800.1o1_6181	PF3D7_1460800.1o1	PF3D7_1460800	conserved Plasmodium protein, unknown function	Pf4500-4	-0.126529
144-V05C	BSPZV1-144	2 wks post final dose	675000	Not Protected	PF3D7_0415600.iso1.exon1.amp1_3858	PF3D7_0415600.iso1.exon1.amp1	PF3D7_0415600	GTP:AMP phosphotransferase	Pf4000-5	-0.199477
144-V05C	BSPZV1-144	2 wks post final dose	675000	Not Protected	PF3D7_0937800.iso1.exon2.amp2_1943	PF3D7_0937800.iso1.exon2.amp2	PF3D7_0937800	erythrocyte membrane protein 1, PfEMP1	Pf4000-5	0.21448
144-V05C	BSPZV1-144	2 wks post final dose	675000	Not Protected	PF3D7_0302100.iso1.exon1.amp1_4002	PF3D7_0302100.iso1.exon1.amp1	PF3D7_0302100	serine/threonine protein kinase	Pf4000-5	0.0475165
144-V05C	BSPZV1-144	2 wks post final dose	675000	Not Protected	PF3D7_1023800.e2_7402	PF3D7_1023800.e2	PF3D7_1023800	conserved Plasmodium protein, unknown function	Pf4500-4	-0.485889
144-V05C	BSPZV1-144	2 wks post final dose	675000	Not Protected	PF3D7_0425000.5o7_8695	PF3D7_0425000.5o7	PF3D7_0425000	Plasmodium exported protein, unknown function, pseudogene	Pf4500-4	0.0959234
144-V05C	BSPZV1-144	2 wks post final dose	675000	Not Protected	PF3D7_0701700.iso1.exon1.amp1_697	PF3D7_0701700.iso1.exon1.amp1	PF3D7_0701700	RESA-like protein	Pf4000-5	0.249708
144-V05C	BSPZV1-144	2 wks post final dose	675000	Not Protected	PF3D7_1249300.iso1.exon1.amp1_1998	PF3D7_1249300.iso1.exon1.amp1	PF3D7_1249300	protein phosphatase, putative	Pf4000-5	0.584897
144-V05C	BSPZV1-144	2 wks post final dose	675000	Not Protected	PF3D7_1475400.e3s4_5702	PF3D7_1475400.e3s4	PF3D7_1475400	cysteine repeat modular protein 4 (CRMP4)	Pf4500-4	0.201358
144-V05C	BSPZV1-144	2 wks post final dose	675000	Not Protected	PF3D7_1017700.iso1.exon1.amp1_3619	PF3D7_1017700.iso1.exon1.amp1	PF3D7_1017700	conserved Plasmodium protein, unknown function	Pf4000-5	0.143305
144-V05C	BSPZV1-144	2 wks post final dose	675000	Not Protected	PF3D7_0612100.iso1.exon1.amp1_3044	PF3D7_0612100.iso1.exon1.amp1	PF3D7_0612100	eukaryotic translation initiation factor 3 subunit L, putative	Pf4000-5	0.0946306
144-V05C	BSPZV1-144	2 wks post final dose	675000	Not Protected	PF3D7_1001900.2o2_7282	PF3D7_1001900.2o2	PF3D7_1001900	Plasmodium exported protein (hyp16), unknown function (PfJ23)	Pf4500-4	0.720229
144-V05C	BSPZV1-144	2 wks post final dose	675000	Not Protected	PF3D7_1411700.1o1_7346	PF3D7_1411700.1o1	PF3D7_1411700	conserved Plasmodium protein, unknown function	Pf4500-4	-0.320196
144-V05C	BSPZV1-144	2 wks post final dose	675000	Not Protected	PF3D7_1368800.e1s2_6277	PF3D7_1368800.e1s2	PF3D7_1368800	DNA repair endonuclease, putative	Pf4500-4	-0.431891
144-V05C	BSPZV1-144	2 wks post final dose	675000	Not Protected	PF3D7_1436300.e1s1_4792	PF3D7_1436300.e1s1	PF3D7_1436300	translocon component PTEX150 (PTEX150)	Pf4500-4	1.10714
144-V05C	BSPZV1-144	2 wks post final dose	675000	Not Protected	PF3D7_1200800.iso1.exon2.amp1_4209	PF3D7_1200800.iso1.exon2.amp1	PF3D7_1200800	serine/threonine protein kinase, FIKK family	Pf4000-5	0.248376
144-V05C	BSPZV1-144	2 wks post final dose	675000	Not Protected	PF3D7_0913300.iso1.exon2.amp1_977	PF3D7_0913300.iso1.exon2.amp1	PF3D7_0913300	conserved Plasmodium protein, unknown function	Pf4000-5	0.202142
144-V05C	BSPZV1-144	2 wks post final dose	675000	Not Protected	PF3D7_1212300.iso1.exon7.amp1_937	PF3D7_1212300.iso1.exon7.amp1	PF3D7_1212300	conserved Plasmodium protein, unknown function	Pf4000-5	-0.140675
144-V05C	BSPZV1-144	2 wks post final dose	675000	Not Protected	PF3D7_1324100.1o1_7618	PF3D7_1324100.1o1	PF3D7_1324100	conserved Plasmodium membrane protein, unknown function	Pf4500-4	-0.277085
144-V05C	BSPZV1-144	2 wks post final dose	675000	Not Protected	PF3D7_1022200.e5s1_9198	PF3D7_1022200.e5s1	PF3D7_1022200	conserved Plasmodium membrane protein, unknown function	Pf4500-4	0.0206514
144-V05C	BSPZV1-144	2 wks post final dose	675000	Not Protected	PF3D7_1475100.iso1.exon1.amp1_seg2_2046	PF3D7_1475100.iso1.exon1.amp1_seg2	PF3D7_1475100	conserved Plasmodium protein, unknown function	Pf4000-5	0.0925897
144-V05C	BSPZV1-144	2 wks post final dose	675000	Not Protected	PF3D7_0424600.e2s1_8623	PF3D7_0424600.e2s1	PF3D7_0424600	Plasmodium exported protein (PHISTb), unknown function	Pf4500-4	0.0236858
144-V05C	BSPZV1-144	2 wks post final dose	675000	Not Protected	PF3D7_1231500.1o1_4656	PF3D7_1231500.1o1	PF3D7_1231500	DIM1 protein homolog, putative	Pf4500-4	-0.0559596
144-V05C	BSPZV1-144	2 wks post final dose	675000	Not Protected	PF3D7_1428400.iso1.exon1.amp1_610	PF3D7_1428400.iso1.exon1.amp1	PF3D7_1428400	probable protein, unknown function	Pf4000-5	-0.171559
144-V05C	BSPZV1-144	2 wks post final dose	675000	Not Protected	PF3D7_1470800.iso1.exon2.amp2_4265	PF3D7_1470800.iso1.exon2.amp2	PF3D7_1470800	conserved Plasmodium protein, unknown function	Pf4000-5	0.770778
144-V05C	BSPZV1-144	2 wks post final dose	675000	Not Protected	PF3D7_0305500.e1s1_5638	PF3D7_0305500.e1s1	PF3D7_0305500	conserved Plasmodium protein, unknown function	Pf4500-4	0.805676
144-V05C	BSPZV1-144	2 wks post final dose	675000	Not Protected	PF3D7_0410400.1o1_6133	PF3D7_0410400.1o1	PF3D7_0410400	exosome complex component RRP4, putative (RRP4)	Pf4500-4	0.185695
144-V05C	BSPZV1-144	2 wks post final dose	675000	Not Protected	PF3D7_0602900.iso1.exon1.amp1_386	PF3D7_0602900.iso1.exon1.amp1	PF3D7_0602900	conserved Plasmodium protein, unknown function	Pf4000-5	-0.27748
144-V05C	BSPZV1-144	2 wks post final dose	675000	Not Protected	PF3D7_1317300.e5s1_7761	PF3D7_1317300.e5s1	PF3D7_1317300	conserved Plasmodium protein, unknown function	Pf4500-4	-0.478893
144-V05C	BSPZV1-144	2 wks post final dose	675000	Not Protected	PF3D7_1118000.1o2_5814	PF3D7_1118000.1o2	PF3D7_1118000	conserved Plasmodium protein, unknown function	Pf4500-4	-0.0539589
144-V05C	BSPZV1-144	2 wks post final dose	675000	Not Protected	PF3D7_1133800.iso1.exon1.amp1_1320	PF3D7_1133800.iso1.exon1.amp1	PF3D7_1133800	RNA (uracil-5-)methyltransferase, putative	Pf4000-5	2.2495
144-V05C	BSPZV1-144	2 wks post final dose	675000	Not Protected	PF3D7_0830800.iso1.exon1.amp2_4505	PF3D7_0830800.iso1.exon1.amp2	PF3D7_0830800	surface-associated interspersed protein 8.2 (SURFIN 8.2)	Pf4000-5	0.0163397
144-V05C	BSPZV1-144	2 wks post final dose	675000	Not Protected	PF3D7_0415200.iso1.exon1.amp2_3427	PF3D7_0415200.iso1.exon1.amp2	PF3D7_0415200	conserved Plasmodium protein, unknown function	Pf4000-5	0.263298
144-V05C	BSPZV1-144	2 wks post final dose	675000	Not Protected	PF3D7_1137700.iso1.exon1.amp1_4202	PF3D7_1137700.iso1.exon1.amp1	PF3D7_1137700	conserved Plasmodium protein, unknown function	Pf4000-5	2.02483
144-V05C	BSPZV1-144	2 wks post final dose	675000	Not Protected	PF3D7_0811000.1o2_6788	PF3D7_0811000.1o2	PF3D7_0811000	cullin-like protein, putative	Pf4500-4	0.192621
144-V05C	BSPZV1-144	2 wks post final dose	675000	Not Protected	PF3D7_0720600.iso1.exon2.amp1_1200	PF3D7_0720600.iso1.exon2.amp1	PF3D7_0720600	conserved Plasmodium protein, unknown function	Pf4000-5	0.13034
144-V05C	BSPZV1-144	2 wks post final dose	675000	Not Protected	PF3D7_1478100.2o2_9007	PF3D7_1478100.2o2	PF3D7_1478100	Plasmodium exported protein (hyp13), unknown function	Pf4500-4	0.252856
144-V05C	BSPZV1-144	2 wks post final dose	675000	Not Protected	PF3D7_1445500.iso1.exon1.amp1_2988	PF3D7_1445500.iso1.exon1.amp1	PF3D7_1445500	conserved Plasmodium protein, unknown function	Pf4000-5	0.12145
144-V05C	BSPZV1-144	2 wks post final dose	675000	Not Protected	PF3D7_1008500.e3s1_6013	PF3D7_1008500.e3s1	PF3D7_1008500	conserved Plasmodium membrane protein, unknown function	Pf4500-4	0.451408
144-V05C	BSPZV1-144	2 wks post final dose	675000	Not Protected	PF3D7_1415900.iso1.exon2.amp1_921	PF3D7_1415900.iso1.exon2.amp1	PF3D7_1415900	conserved Plasmodium protein, unknown function	Pf4000-5	0.517895
144-V05C	BSPZV1-144	2 wks post final dose	675000	Not Protected	PF3D7_0503900.2o2_5032	PF3D7_0503900.2o2	PF3D7_0503900	conserved Plasmodium protein, unknown function	Pf4500-4	0.542289
144-V05C	BSPZV1-144	2 wks post final dose	675000	Not Protected	PF3D7_0509300.iso1.exon1.amp1_4409	PF3D7_0509300.iso1.exon1.amp1	PF3D7_0509300	conserved Plasmodium protein, unknown function	Pf4000-5	-0.140238
144-V05C	BSPZV1-144	2 wks post final dose	675000	Not Protected	PF3D7_1147200.iso1.exon1.amp3_4233	PF3D7_1147200.iso1.exon1.amp3	PF3D7_1147200	tubulin-tyrosine ligase, putative	Pf4000-5	2.07981
144-V05C	BSPZV1-144	2 wks post final dose	675000	Not Protected	PF3D7_0405900.e4s1_5742	PF3D7_0405900.e4s1	PF3D7_0405900	apical sushi protein (ASP)	Pf4500-4	0.113476
144-V05C	BSPZV1-144	2 wks post final dose	675000	Not Protected	PF3D7_0602100.iso1.exon1.amp1_1671	PF3D7_0602100.iso1.exon1.amp1	PF3D7_0602100	ATP-dependent RNA helicase, putative	Pf4000-5	1.83982
144-V05C	BSPZV1-144	2 wks post final dose	675000	Not Protected	PF3D7_0813700.iso1.exon1.amp2_2781	PF3D7_0813700.iso1.exon1.amp2	PF3D7_0813700	ABC transporter, putative	Pf4000-5	-0.282047
144-V05C	BSPZV1-144	2 wks post final dose	675000	Not Protected	PF3D7_0815700.1o2_8743	PF3D7_0815700.1o2	PF3D7_0815700	ubiquitin (Ub)	Pf4500-4	-0.462613
144-V05C	BSPZV1-144	2 wks post final dose	675000	Not Protected	PF3D7_1450400.iso1.exon1.amp1_3403	PF3D7_1450400.iso1.exon1.amp1	PF3D7_1450400	zinc finger protein, putative	Pf4000-5	0.601172
144-V05C	BSPZV1-144	2 wks post final dose	675000	Not Protected	PF3D7_1129000.e4s1_9150	PF3D7_1129000.e4s1	PF3D7_1129000	spermidine synthase (SpdSyn)	Pf4500-4	0.0314326
144-V05C	BSPZV1-144	2 wks post final dose	675000	Not Protected	PF3D7_1133900.iso1.exon1.amp1_2972	PF3D7_1133900.iso1.exon1.amp1	PF3D7_1133900	conserved Plasmodium protein, unknown function	Pf4000-5	-0.124397
144-V05C	BSPZV1-144	2 wks post final dose	675000	Not Protected	PF3D7_0937400.iso1.exon2.amp1_1296	PF3D7_0937400.iso1.exon2.amp1	PF3D7_0937400	rifin	Pf4000-5	0.827995
144-V05C	BSPZV1-144	2 wks post final dose	675000	Not Protected	PF3D7_1477900.2o3_5630	PF3D7_1477900.2o3	PF3D7_1477900	acyl-CoA synthetase, pseudogene (ACS1b)	Pf4500-4	-0.00520922
144-V05C	BSPZV1-144	2 wks post final dose	675000	Not Protected	PF3D7_0617900.iso1.exon1.amp1_3571	PF3D7_0617900.iso1.exon1.amp1	PF3D7_0617900	histone H3 variant, putative	Pf4000-5	0.135576
144-V05C	BSPZV1-144	2 wks post final dose	675000	Not Protected	PF3D7_1012800.1o1_6484	PF3D7_1012800.1o1	PF3D7_1012800	conserved Plasmodium protein, unknown function	Pf4500-4	-0.173758
144-V05C	BSPZV1-144	2 wks post final dose	675000	Not Protected	PF3D7_0422200.iso1.exon1.amp3_3411	PF3D7_0422200.iso1.exon1.amp3	PF3D7_0422200	erythrocyte membrane-associated antigen	Pf4000-5	-0.212265
144-V05C	BSPZV1-144	2 wks post final dose	675000	Not Protected	PF3D7_1134500.s2_6572	PF3D7_1134500.s2	PF3D7_1134500	alpha/beta hydrolase, putative	Pf4500-4	-0.471665
144-V05C	BSPZV1-144	2 wks post final dose	675000	Not Protected	PF3D7_0709300.iso1.exon1.amp3_2493	PF3D7_0709300.iso1.exon1.amp3	PF3D7_0709300	Cg2 protein	Pf4000-5	0.489691
144-V05C	BSPZV1-144	2 wks post final dose	675000	Not Protected	PF3D7_1354500.e2s1_5726	PF3D7_1354500.e2s1	PF3D7_1354500	adenylosuccinate synthetase (adsS)	Pf4500-4	0.298826
144-V05C	BSPZV1-144	2 wks post final dose	675000	Not Protected	PF3D7_1239200.e1s2_7139	PF3D7_1239200.e1s2	PF3D7_1239200	transcription factor with AP2 domain(s) (ApiAP2)	Pf4500-4	-0.0947151
144-V05C	BSPZV1-144	2 wks post final dose	675000	Not Protected	PF3D7_0927800.2o2_4680	PF3D7_0927800.2o2	PF3D7_0927800	cytochrome c oxidase subunit, putative	Pf4500-4	-0.0795761
144-V05C	BSPZV1-144	2 wks post final dose	675000	Not Protected	PF3D7_1474400.iso1.exon14.amp1_99	PF3D7_1474400.iso1.exon14.amp1	PF3D7_1474400	conserved Plasmodium protein, unknown function	Pf4000-5	-0.50468
144-V05C	BSPZV1-144	2 wks post final dose	675000	Not Protected	PF3D7_1337800.1o1_6468	PF3D7_1337800.1o1	PF3D7_1337800	calcium dependent protein kinase 5 (CDPK5)	Pf4500-4	0.725597
144-V05C	BSPZV1-144	2 wks post final dose	675000	Not Protected	PF3D7_0508900.iso1.exon1.amp2_1967	PF3D7_0508900.iso1.exon1.amp2	PF3D7_0508900	conserved Plasmodium protein, unknown function	Pf4000-5	0.86107
144-V05C	BSPZV1-144	2 wks post final dose	675000	Not Protected	PF3D7_0208700.iso2.exon4.amp1_1767	PF3D7_0208700.iso2.exon4.amp1	PF3D7_0208700	conserved Plasmodium protein, unknown function	Pf4000-5	0.270866
144-V05C	BSPZV1-144	2 wks post final dose	675000	Not Protected	PF3D7_0632000.iso1.exon2.amp1_3020	PF3D7_0632000.iso1.exon2.amp1	PF3D7_0632000	rifin	Pf4000-5	0.718435
144-V05C	BSPZV1-144	2 wks post final dose	675000	Not Protected	PF3D7_0423700.1o1_6673	PF3D7_0423700.1o1	PF3D7_0423700	early transcribed membrane protein 4 (ETRAMP4)	Pf4500-4	3.5451
144-V05C	BSPZV1-144	2 wks post final dose	675000	Not Protected	PF3D7_1335900_7674	PF3D7_1335900	PF3D7_1335900	sporozoite surface protein 2 (TRAP)	Pf4500-4	-0.101931
144-V05C	BSPZV1-144	2 wks post final dose	675000	Not Protected	PF3D7_1229300.1o1_8528	PF3D7_1229300.1o1	PF3D7_1229300	conserved Plasmodium protein, unknown function	Pf4500-4	0.507352
144-V05C	BSPZV1-144	2 wks post final dose	675000	Not Protected	PF3D7_1308400.e1s2_5942	PF3D7_1308400.e1s2	PF3D7_1308400	conserved Plasmodium protein, unknown function	Pf4500-4	-0.0268252
144-V05C	BSPZV1-144	2 wks post final dose	675000	Not Protected	PF3D7_0712600.iso1.exon1.amp1_434	PF3D7_0712600.iso1.exon1.amp1	PF3D7_0712600	erythrocyte membrane protein 1, PfEMP1	Pf4000-5	0.918132
144-V05C	BSPZV1-144	2 wks post final dose	675000	Not Protected	PF3D7_1451200.iso1.exon1.amp1_2821	PF3D7_1451200.iso1.exon1.amp1	PF3D7_1451200	conserved Plasmodium protein, unknown function	Pf4000-5	-0.140893
144-V05C	BSPZV1-144	2 wks post final dose	675000	Not Protected	PF3D7_0222900.1o1_4649	PF3D7_0222900.1o1	PF3D7_0222900	erythrocyte membrane protein 1 (PfEMP1), exon2, pseudogene	Pf4500-4	1.53798
144-V05C	BSPZV1-144	2 wks post final dose	675000	Not Protected	PF3D7_1127500.iso1.exon1.amp1_27	PF3D7_1127500.iso1.exon1.amp1	PF3D7_1127500	protein disulfide isomerase, putative	Pf4000-5	0.0427194
144-V05C	BSPZV1-144	2 wks post final dose	675000	Not Protected	PF3D7_1322200.iso1.exon9.amp1_195	PF3D7_1322200.iso1.exon9.amp1	PF3D7_1322200	conserved Plasmodium protein, unknown function	Pf4000-5	0.46724
144-V05C	BSPZV1-144	2 wks post final dose	675000	Not Protected	PF3D7_0728800.iso1.exon1.amp1_4481	PF3D7_0728800.iso1.exon1.amp1	PF3D7_0728800	conserved Plasmodium protein, unknown function	Pf4000-5	-0.102764
144-V05C	BSPZV1-144	2 wks post final dose	675000	Not Protected	PF3D7_1137100_7714	PF3D7_1137100	PF3D7_1137100	mitochondrial ribosomal protein S9 precursor, putative	Pf4500-4	-0.653591
144-V05C	BSPZV1-144	2 wks post final dose	675000	Not Protected	PF3D7_1003400.iso1.exon1.amp1_4289	PF3D7_1003400.iso1.exon1.amp1	PF3D7_1003400	conserved Plasmodium protein, unknown function	Pf4000-5	0.0503872
144-V05C	BSPZV1-144	2 wks post final dose	675000	Not Protected	PF3D7_0821300.iso1.exon3.amp1_3898	PF3D7_0821300.iso1.exon3.amp1	PF3D7_0821300	ATP-dependent RNA helicase prh1, putative	Pf4000-5	0.25104
144-V05C	BSPZV1-144	2 wks post final dose	675000	Not Protected	PF3D7_1251200.e3s1_6037	PF3D7_1251200.e3s1	PF3D7_1251200	coronin	Pf4500-4	0.327349
144-V05C	BSPZV1-144	2 wks post final dose	675000	Not Protected	PF3D7_1118600.1o1_7043	PF3D7_1118600.1o1	PF3D7_1118600	histone acetyltransferase, putative (MYST)	Pf4500-4	0.0109362
144-V05C	BSPZV1-144	2 wks post final dose	675000	Not Protected	PF3D7_1439400.e1s1_5750	PF3D7_1439400.e1s1	PF3D7_1439400	ubiquinol-cytochrome c reductase iron-sulfur subunit, putative	Pf4500-4	0.43241
144-V05C	BSPZV1-144	2 wks post final dose	675000	Not Protected	PF3D7_0502800.1o1_6679	PF3D7_0502800.1o1	PF3D7_0502800	DnaJ protein, putative	Pf4500-4	-0.309177
144-V05C	BSPZV1-144	2 wks post final dose	675000	Not Protected	PF3D7_0723800.iso1.exon1.amp3_2230	PF3D7_0723800.iso1.exon1.amp3	PF3D7_0723800	conserved Plasmodium protein, unknown function	Pf4000-5	0.288805
144-V05C	BSPZV1-144	2 wks post final dose	675000	Not Protected	PF3D7_0912400.2o2_5279	PF3D7_0912400.2o2	PF3D7_0912400	conserved Plasmodium protein, unknown function	Pf4500-4	-0.00520922
144-V05C	BSPZV1-144	2 wks post final dose	675000	Not Protected	PF3D7_0927900.1o1_4984	PF3D7_0927900.1o1	PF3D7_0927900	phosphatidylserine decarboxylase (PSD)	Pf4500-4	0.154197
144-V05C	BSPZV1-144	2 wks post final dose	675000	Not Protected	PF3D7_1352000.iso1.exon1.amp1_243	PF3D7_1352000.iso1.exon1.amp1	PF3D7_1352000	conserved Plasmodium protein, unknown function	Pf4000-5	0.418597
144-V05C	BSPZV1-144	2 wks post final dose	675000	Not Protected	PF3D7_0617400.s4 (renamed)_5391	PF3D7_0617400.s4 (renamed)	PF3D7_0617400	erythrocyte membrane protein 1, PfEMP1 (VAR)	Pf4500-4	0.150732
144-V05C	BSPZV1-144	2 wks post final dose	675000	Not Protected	PF3D7_1112900.iso1.exon5.amp1_1512	PF3D7_1112900.iso1.exon5.amp1	PF3D7_1112900	conserved Plasmodium protein, unknown function	Pf4000-5	-1.03751
144-V05C	BSPZV1-144	2 wks post final dose	675000	Not Protected	PF3D7_0218300.2o4_6804	PF3D7_0218300.2o4	PF3D7_0218300	apicoplast RNA methyltransferase precursor, putative	Pf4500-4	0.189922
144-V05C	BSPZV1-144	2 wks post final dose	675000	Not Protected	PF3D7_0919900.iso1.exon1.amp1_1105	PF3D7_0919900.iso1.exon1.amp1	PF3D7_0919900	regulator of chromosome condensation, putative	Pf4000-5	0.176619
144-V05C	BSPZV1-144	2 wks post final dose	675000	Not Protected	PF3D7_1013600.s1_8839	PF3D7_1013600.s1	PF3D7_1013600	conserved Plasmodium protein, unknown function	Pf4500-4	0.13626
144-V05C	BSPZV1-144	2 wks post final dose	675000	Not Protected	PF3D7_0935200.iso1.exon1.amp2_770	PF3D7_0935200.iso1.exon1.amp2	PF3D7_0935200	sec-1 family protein	Pf4000-5	0.180118
144-V05C	BSPZV1-144	2 wks post final dose	675000	Not Protected	PF3D7_1444800.e1s1_8312	PF3D7_1444800.e1s1	PF3D7_1444800	fructose-bisphosphate aldolase	Pf4500-4	0.0728543
144-V05C	BSPZV1-144	2 wks post final dose	675000	Not Protected	PF3D7_0526200.iso2.exon2.amp1_1799	PF3D7_0526200.iso2.exon2.amp1	PF3D7_0526200	ADP-ribosylation factor GTPase-activating protein, putative	Pf4000-5	1.58437
144-V05C	BSPZV1-144	2 wks post final dose	675000	Not Protected	PF3D7_1106800.iso1.exon3.amp1_945	PF3D7_1106800.iso1.exon3.amp1	PF3D7_1106800	protein kinase, putative	Pf4000-5	-0.00416357
144-V05C	BSPZV1-144	2 wks post final dose	675000	Not Protected	PF3D7_1302300.iso1.exon1.amp1_3260	PF3D7_1302300.iso1.exon1.amp1	PF3D7_1302300	Plasmodium exported protein, unknown function	Pf4000-5	0.751268
144-V05C	BSPZV1-144	2 wks post final dose	675000	Not Protected	PF3D7_1019500.iso2.exon20.amp1_905	PF3D7_1019500.iso2.exon20.amp1	PF3D7_1019500	conserved Plasmodium membrane protein, unknown function	Pf4000-5	-0.05797
144-V05C	BSPZV1-144	2 wks post final dose	675000	Not Protected	PF3D7_0113800.4o4_7953	PF3D7_0113800.4o4	PF3D7_0113800	DBL containing protein, unknown function	Pf4500-4	0.0726712
144-V05C	BSPZV1-144	2 wks post final dose	675000	Not Protected	PF3D7_1214300.2o2_7307	PF3D7_1214300.2o2	PF3D7_1214300	geranylgeranyltransferase type2 beta subunit, putative	Pf4500-4	-0.225059
144-V05C	BSPZV1-144	2 wks post final dose	675000	Not Protected	PF3D7_1332400.iso1.exon1.amp1_1033	PF3D7_1332400.iso1.exon1.amp1	PF3D7_1332400	nucleotidyltransferase, putative	Pf4000-5	0.460925
144-V05C	BSPZV1-144	2 wks post final dose	675000	Not Protected	PF3D7_0100900.iso1.exon1.amp1_2446	PF3D7_0100900.iso1.exon1.amp1	PF3D7_0100900	rifin	Pf4000-5	1.04924
144-V05C	BSPZV1-144	2 wks post final dose	675000	Not Protected	PF3D7_0404600.s1_9174	PF3D7_0404600.s1	PF3D7_0404600	conserved Plasmodium membrane protein, unknown function	Pf4500-4	-0.0932762
144-V05C	BSPZV1-144	2 wks post final dose	675000	Not Protected	PF3D7_0603100.1o1_7881	PF3D7_0603100.1o1	PF3D7_0603100	conserved Plasmodium protein, unknown function	Pf4500-4	1.13862
144-V05C	BSPZV1-144	2 wks post final dose	675000	Not Protected	PF3D7_0210200.iso1.exon2.amp2_seg1_2597	PF3D7_0210200.iso1.exon2.amp2_seg1	PF3D7_0210200	conserved Plasmodium protein, unknown function	Pf4000-5	2.17443
144-V05C	BSPZV1-144	2 wks post final dose	675000	Not Protected	PF3D7_0505000.iso1.exon1.amp1_3994	PF3D7_0505000.iso1.exon1.amp1	PF3D7_0505000	conserved Plasmodium membrane protein, unknown function	Pf4000-5	0.0659799
144-V05C	BSPZV1-144	2 wks post final dose	675000	Not Protected	PF3D7_0720900.3o4_7275	PF3D7_0720900.3o4	PF3D7_0720900	conserved Plasmodium protein, unknown function	Pf4500-4	-0.378338
144-V05C	BSPZV1-144	2 wks post final dose	675000	Not Protected	PF3D7_1439500.iso1.exon1.amp2_4529	PF3D7_1439500.iso1.exon1.amp2	PF3D7_1439500	CCAAT-binding transcription factor, putative	Pf4000-5	-0.261728
144-V05C	BSPZV1-144	2 wks post final dose	675000	Not Protected	PF3D7_0727200.1o1_6756	PF3D7_0727200.1o1	PF3D7_0727200	cysteine desulfurase, putative (NFS)	Pf4500-4	0.927732
144-V05C	BSPZV1-144	2 wks post final dose	675000	Not Protected	PFD0175c_1o1_8408	PFD0175c_1o1	PFD0175c_1o1	hypothetical protein	Pf4500-4	-1.02702
144-V05C	BSPZV1-144	2 wks post final dose	675000	Not Protected	PF3D7_1435800.iso1.exon1.amp1_147	PF3D7_1435800.iso1.exon1.amp1	PF3D7_1435800	GTPase, putative	Pf4000-5	0.207295
144-V05C	BSPZV1-144	2 wks post final dose	675000	Not Protected	PF3D7_1471500.6o6_4976	PF3D7_1471500.6o6	PF3D7_1471500	conserved Plasmodium membrane protein, unknown function	Pf4500-4	-0.042806
144-V05C	BSPZV1-144	2 wks post final dose	675000	Not Protected	PF3D7_0516200.e1s1_4816	PF3D7_0516200.e1s1	PF3D7_0516200	40S ribosomal protein S14, putative	Pf4500-4	0.327196
144-V05C	BSPZV1-144	2 wks post final dose	675000	Not Protected	PF3D7_0905400.e6s1_7762	PF3D7_0905400.e6s1	PF3D7_0905400	high molecular weight rhoptry protein 3 (RhopH3)	Pf4500-4	-0.228665
144-V05C	BSPZV1-144	2 wks post final dose	675000	Not Protected	PF3D7_0623300.iso1.exon4.amp1_75	PF3D7_0623300.iso1.exon4.amp1	PF3D7_0623300	EGF-like membrane protein, putative	Pf4000-5	0.46724
144-V05C	BSPZV1-144	2 wks post final dose	675000	Not Protected	PF3D7_1406800.1o3_7003	PF3D7_1406800.1o3	PF3D7_1406800	glideosome associated protein with multiple membrane spans 3 (GAPM3)	Pf4500-4	-0.29092
144-V05C	BSPZV1-144	2 wks post final dose	675000	Not Protected	PF3D7_1467500.iso1.exon1.amp1_1009	PF3D7_1467500.iso1.exon1.amp1	PF3D7_1467500	conserved Plasmodium protein, unknown function	Pf4000-5	0.571636
144-V05C	BSPZV1-144	2 wks post final dose	675000	Not Protected	PF3D7_0103300.2o3_5918	PF3D7_0103300.2o3	PF3D7_0103300	conserved Plasmodium protein, unknown function	Pf4500-4	-0.035879
144-V05C	BSPZV1-144	2 wks post final dose	675000	Not Protected	PF3D7_1449200.iso1.exon1.amp1_315	PF3D7_1449200.iso1.exon1.amp1	PF3D7_1449200	conserved Plasmodium protein, unknown function	Pf4000-5	-0.212953
144-V05C	BSPZV1-144	2 wks post final dose	675000	Not Protected	PF3D7_0504400.iso1.exon1.amp1_2757	PF3D7_0504400.iso1.exon1.amp1	PF3D7_0504400	ATP-dependent helicase, putative	Pf4000-5	0.221968
144-V05C	BSPZV1-144	2 wks post final dose	675000	Not Protected	PF3D7_0729900.e1s1_5072	PF3D7_0729900.e1s1	PF3D7_0729900	dynein heavy chain, putative	Pf4500-4	0.458994
144-V05C	BSPZV1-144	2 wks post final dose	675000	Not Protected	PF3D7_0405800.iso1.exon1.amp1_83	PF3D7_0405800.iso1.exon1.amp1	PF3D7_0405800	conserved Plasmodium protein, unknown function	Pf4000-5	0.350198
144-V05C	BSPZV1-144	2 wks post final dose	675000	Not Protected	PF3D7_0312500.1o1_6469	PF3D7_0312500.1o1	PF3D7_0312500	transporter, putative	Pf4500-4	-0.197633
144-V05C	BSPZV1-144	2 wks post final dose	675000	Not Protected	PF3D7_1453500.iso1.exon3.amp2_1392	PF3D7_1453500.iso1.exon3.amp2	PF3D7_1453500	pyridine nucleotide transhydrogenase, putative	Pf4000-5	0.178544
144-V05C	BSPZV1-144	2 wks post final dose	675000	Not Protected	PF3D7_1347000.iso1.exon7.amp1_363	PF3D7_1347000.iso1.exon7.amp1	PF3D7_1347000	G-beta repeat protein, putative	Pf4000-5	-0.149651
144-V05C	BSPZV1-144	2 wks post final dose	675000	Not Protected	PF3D7_1328200.iso1.exon1.amp1_3962	PF3D7_1328200.iso1.exon1.amp1	PF3D7_1328200	conserved Plasmodium protein, unknown function	Pf4000-5	0.380323
144-V05C	BSPZV1-144	2 wks post final dose	675000	Not Protected	PF3D7_1234900.iso1.exon2.amp1_2406	PF3D7_1234900.iso1.exon2.amp1	PF3D7_1234900	conserved Plasmodium protein, unknown function	Pf4000-5	0.425099
144-V05C	BSPZV1-144	2 wks post final dose	675000	Not Protected	PF3D7_0810400.1o1_4729	PF3D7_0810400.1o1	PF3D7_0810400	conserved Plasmodium membrane protein, unknown function	Pf4500-4	0.170374
144-V05C	BSPZV1-144	2 wks post final dose	675000	Not Protected	PF3D7_1137600 (renamed)_7629	PF3D7_1137600 (renamed)	PF3D7_1137600	conserved Plasmodium protein, unknown function	Pf4500-4	0.597172
144-V05C	BSPZV1-144	2 wks post final dose	675000	Not Protected	PF3D7_1113000.iso1.exon7.amp2_3380	PF3D7_1113000.iso1.exon7.amp2	PF3D7_1113000	conserved Plasmodium protein, unknown function	Pf4000-5	0.308442
144-V05C	BSPZV1-144	2 wks post final dose	675000	Not Protected	PF3D7_1031700.iso1.exon1.amp1_3523	PF3D7_1031700.iso1.exon1.amp1	PF3D7_1031700	protein phosphatase inhibitor 3	Pf4000-5	0.317526
144-V05C	BSPZV1-144	2 wks post final dose	675000	Not Protected	PF3D7_0314100.iso1.exon9.amp1_3499	PF3D7_0314100.iso1.exon9.amp1	PF3D7_0314100	vesicle transport v-SNARE protein, putative	Pf4000-5	0.0423349
144-V05C	BSPZV1-144	2 wks post final dose	675000	Not Protected	PF3D7_0520200.1o1_5040	PF3D7_0520200.1o1	PF3D7_0520200	conserved Plasmodium protein, unknown function	Pf4500-4	-0.27196
144-V05C	BSPZV1-144	2 wks post final dose	675000	Not Protected	PF3D7_0306000.1o1_6101	PF3D7_0306000.1o1	PF3D7_0306000	conserved Plasmodium protein, unknown function	Pf4500-4	0.224125
144-V05C	BSPZV1-144	2 wks post final dose	675000	Not Protected	PF3D7_1332100.1o1_8480	PF3D7_1332100.1o1	PF3D7_1332100	conserved Plasmodium membrane protein, unknown function	Pf4500-4	-0.686377
144-V05C	BSPZV1-144	2 wks post final dose	675000	Not Protected	PF3D7_0626100.iso1.exon5.amp1_4074	PF3D7_0626100.iso1.exon5.amp1	PF3D7_0626100	oxidoreductase, short-chain dehydrogenase family, putative	Pf4000-5	-0.0477017
144-V05C	BSPZV1-144	2 wks post final dose	675000	Not Protected	PF3D7_0110400.2o2_5822	PF3D7_0110400.2o2	PF3D7_0110400	DNA-directed RNA polymerase 2, putative	Pf4500-4	0.197836
144-V05C	BSPZV1-144	2 wks post final dose	675000	Not Protected	PF3D7_0208500.iso1.exon2.amp1_2661	PF3D7_0208500.iso1.exon2.amp1	PF3D7_0208500	acyl carrier protein	Pf4000-5	0.338189
144-V05C	BSPZV1-144	2 wks post final dose	675000	Not Protected	PF3D7_1347700.1o3_5607	PF3D7_1347700.1o3	PF3D7_1347700	ethanolamine-phosphate cytidylyltransferase, putative (ECT)	Pf4500-4	1.06349
144-V05C	BSPZV1-144	2 wks post final dose	675000	Not Protected	PF3D7_1123900.e1s1_8887	PF3D7_1123900.e1s1	PF3D7_1123900	splicing factor, putative	Pf4500-4	0.255439
144-V05C	BSPZV1-144	2 wks post final dose	675000	Not Protected	PF3D7_0812200.iso1.exon3.amp1_913	PF3D7_0812200.iso1.exon3.amp1	PF3D7_0812200	trypsin-like serine protease, putative	Pf4000-5	0.0151647
144-V05C	BSPZV1-144	2 wks post final dose	675000	Not Protected	PF3D7_0412700.iso1.exon2.amp2_1081	PF3D7_0412700.iso1.exon2.amp2	PF3D7_0412700	erythrocyte membrane protein 1, PfEMP1	Pf4000-5	0.708534
144-V05C	BSPZV1-144	2 wks post final dose	675000	Not Protected	PF3D7_0404100.iso1.exon2.amp1_674	PF3D7_0404100.iso1.exon2.amp1	PF3D7_0404100	transcription factor with AP2 domain(s), putative	Pf4000-5	0.453426
144-V05C	BSPZV1-144	2 wks post final dose	675000	Not Protected	PF3D7_0934100.iso1.exon1.amp1_3148	PF3D7_0934100.iso1.exon1.amp1	PF3D7_0934100	DNA excision-repair helicase, putative	Pf4000-5	0.287832
144-V05C	BSPZV1-144	2 wks post final dose	675000	Not Protected	PF3D7_0609000.iso1.exon1.amp4_2534	PF3D7_0609000.iso1.exon1.amp4	PF3D7_0609000	conserved Plasmodium protein, unknown function	Pf4000-5	-0.0691425
144-V05C	BSPZV1-144	2 wks post final dose	675000	Not Protected	PF3D7_0105600.2o3_5654	PF3D7_0105600.2o3	PF3D7_0105600	conserved Plasmodium protein, unknown function	Pf4500-4	0.187726
144-V05C	BSPZV1-144	2 wks post final dose	675000	Not Protected	PF3D7_1230000.iso1.exon2.amp1_2063	PF3D7_1230000.iso1.exon2.amp1	PF3D7_1230000	conserved Plasmodium protein, unknown function	Pf4000-5	0.355624
144-V05C	BSPZV1-144	2 wks post final dose	675000	Not Protected	PF3D7_0720400.e1s1_8049	PF3D7_0720400.e1s1	PF3D7_0720400	ferrodoxin reductase-like protein	Pf4500-4	0.138886
144-V05C	BSPZV1-144	2 wks post final dose	675000	Not Protected	PF3D7_0530900.iso1.exon1.amp1_818	PF3D7_0530900.iso1.exon1.amp1	PF3D7_0530900	formin 1	Pf4000-5	0.760997
144-V05C	BSPZV1-144	2 wks post final dose	675000	Not Protected	PF3D7_1312600.e1s1_5463	PF3D7_1312600.e1s1	PF3D7_1312600	branched-chain alpha keto-acid dehydrogenase, putative	Pf4500-4	-1.57977
144-V05C	BSPZV1-144	2 wks post final dose	675000	Not Protected	PF3D7_1139200.iso1.exon1.amp1_2390	PF3D7_1139200.iso1.exon1.amp1	PF3D7_1139200	conserved Plasmodium protein, unknown function	Pf4000-5	0.152063
144-V05C	BSPZV1-144	2 wks post final dose	675000	Not Protected	PF3D7_0709900.e1s1_5678	PF3D7_0709900.e1s1	PF3D7_0709900	conserved Plasmodium membrane protein, unknown function	Pf4500-4	0.369551
144-V05C	BSPZV1-144	2 wks post final dose	675000	Not Protected	PF3D7_1474000.iso1.exon1.amp1_seg2_3196	PF3D7_1474000.iso1.exon1.amp1_seg2	PF3D7_1474000	probable protein, unknown function	Pf4000-5	-0.0913286
144-V05C	BSPZV1-144	2 wks post final dose	675000	Not Protected	PF3D7_0420700.e2s1_8336	PF3D7_0420700.e2s1	PF3D7_0420700	erythrocyte membrane protein 1, PfEMP1 (VAR)	Pf4500-4	2.70531
144-V05C	BSPZV1-144	2 wks post final dose	675000	Not Protected	PF3D7_0201200.iso1.exon2.amp1_3603	PF3D7_0201200.iso1.exon2.amp1	PF3D7_0201200	rifin	Pf4000-5	1.65987
144-V05C	BSPZV1-144	2 wks post final dose	675000	Not Protected	PF3D7_0908500.e18s1_8632	PF3D7_0908500.e18s1	PF3D7_0908500	conserved Plasmodium protein, unknown function	Pf4500-4	0.598826
144-V05C	BSPZV1-144	2 wks post final dose	675000	Not Protected	PF3D7_1359600.iso1.exon1.amp3_1344	PF3D7_1359600.iso1.exon1.amp3	PF3D7_1359600	conserved Plasmodium protein, unknown function	Pf4000-5	-0.0446354
144-V05C	BSPZV1-144	2 wks post final dose	675000	Not Protected	PF3D7_1315800.1o1_5583	PF3D7_1315800.1o1	PF3D7_1315800	Myb1-related transcription factor (MYB1)	Pf4500-4	-0.0936872
144-V05C	BSPZV1-144	2 wks post final dose	675000	Not Protected	PF3D7_1216000.1o1_7905	PF3D7_1216000.1o1	PF3D7_1216000	seryl-tRNA synthetase, putative	Pf4500-4	0.230048
144-V05C	BSPZV1-144	2 wks post final dose	675000	Not Protected	PF3D7_1011300.1o1_5319	PF3D7_1011300.1o1	PF3D7_1011300	conserved Plasmodium membrane protein, unknown function	Pf4500-4	-0.104
144-V05C	BSPZV1-144	2 wks post final dose	675000	Not Protected	PF3D7_1411000.iso1.exon6.amp1_51	PF3D7_1411000.iso1.exon6.amp1	PF3D7_1411000	conserved Plasmodium protein, unknown function	Pf4000-5	0.169243
144-V05C	BSPZV1-144	2 wks post final dose	675000	Not Protected	PF3D7_1200600.iso1.exon2.amp3_2805	PF3D7_1200600.iso1.exon2.amp3	PF3D7_1200600	erythrocyte membrane protein 1, PfEMP1	Pf4000-5	-0.0602389
144-V05C	BSPZV1-144	2 wks post final dose	675000	Not Protected	PF3D7_0308000.1o1_8767	PF3D7_0308000.1o1	PF3D7_0308000	DNA polymerase epsilon subunit b, putative	Pf4500-4	0.54295
144-V05C	BSPZV1-144	2 wks post final dose	675000	Not Protected	PF3D7_1135500.iso1.exon4.amp1_4369	PF3D7_1135500.iso1.exon4.amp1	PF3D7_1135500	conserved Plasmodium protein, unknown function	Pf4000-5	0.0566826
144-V05C	BSPZV1-144	2 wks post final dose	675000	Not Protected	PF3D7_1467900.e3s2_6285	PF3D7_1467900.e3s2	PF3D7_1467900	rab GTPase activator, putative	Pf4500-4	0.0204615
144-V05C	BSPZV1-144	2 wks post final dose	675000	Not Protected	PF3D7_1474600.1o5_4705	PF3D7_1474600.1o5	PF3D7_1474600	conserved Plasmodium membrane protein, unknown function	Pf4500-4	0.269088
144-V05C	BSPZV1-144	2 wks post final dose	675000	Not Protected	PF3D7_1000500.iso1.exon3.amp1_4465	PF3D7_1000500.iso1.exon3.amp1	PF3D7_1000500	rifin	Pf4000-5	0.622676
144-V05C	BSPZV1-144	2 wks post final dose	675000	Not Protected	PF3D7_0627400.1o1_5247	PF3D7_0627400.1o1	PF3D7_0627400	mitochondrial import inner membrane translocase subunit, putative	Pf4500-4	1.83846
144-V05C	BSPZV1-144	2 wks post final dose	675000	Not Protected	PF3D7_1119000.iso1.exon1.amp1_2733	PF3D7_1119000.iso1.exon1.amp1	PF3D7_1119000	acyl-CoA-binding protein, putative	Pf4000-5	0.136837
144-V05C	BSPZV1-144	2 wks post final dose	675000	Not Protected	PF3D7_1232300.iso1.exon1.amp1_3212	PF3D7_1232300.iso1.exon1.amp1	PF3D7_1232300	cytochrome b5, putative	Pf4000-5	0.335682
144-V05C	BSPZV1-144	2 wks post final dose	675000	Not Protected	PF3D7_1449700.iso1.exon1.amp2_3667	PF3D7_1449700.iso1.exon1.amp2	PF3D7_1449700	exosome complex exonuclease RRP6, putative	Pf4000-5	0.00829143
144-V05C	BSPZV1-144	2 wks post final dose	675000	Not Protected	PF3D7_0320400.e1s4_7794	PF3D7_0320400.e1s4	PF3D7_0320400	oocyst capsule protein (Cap380)	Pf4500-4	-1.01218
144-V05C	BSPZV1-144	2 wks post final dose	675000	Not Protected	PF3D7_0719900.iso1.exon1.amp4_746	PF3D7_0719900.iso1.exon1.amp4	PF3D7_0719900	conserved Plasmodium membrane protein, unknown function	Pf4000-5	0.518172
144-V05C	BSPZV1-144	2 wks post final dose	675000	Not Protected	PF3D7_1436700.iso1.exon2.amp1_2183	PF3D7_1436700.iso1.exon2.amp1	PF3D7_1436700	conserved Plasmodium protein, unknown function	Pf4000-5	0.191952
144-V05C	BSPZV1-144	2 wks post final dose	675000	Not Protected	PF3D7_0425800.iso1.exon1.amp4_458	PF3D7_0425800.iso1.exon1.amp4	PF3D7_0425800	erythrocyte membrane protein 1, PfEMP1	Pf4000-5	0.361492
144-V05C	BSPZV1-144	2 wks post final dose	675000	Not Protected	PF3D7_1343500.1o4_5271	PF3D7_1343500.1o4	PF3D7_1343500	conserved Plasmodium protein, unknown function	Pf4500-4	-0.874469
144-V05C	BSPZV1-144	2 wks post final dose	675000	Not Protected	PF3D7_1126400.2o3_5535	PF3D7_1126400.2o3	PF3D7_1126400	large ribosomal subunit processing factor, putative	Pf4500-4	0.388654
144-V05C	BSPZV1-144	2 wks post final dose	675000	Not Protected	PF3D7_1344400.iso1.exon1.amp1_3037	PF3D7_1344400.iso1.exon1.amp1	PF3D7_1344400	conserved Plasmodium protein, unknown function	Pf4000-5	0.106081
144-V05C	BSPZV1-144	2 wks post final dose	675000	Not Protected	PF3D7_1246900.iso1.exon2.amp1_3308	PF3D7_1246900.iso1.exon2.amp1	PF3D7_1246900	RAC-beta serine/threonine protein kinase	Pf4000-5	0.253367
144-V05C	BSPZV1-144	2 wks post final dose	675000	Not Protected	PF3D7_0302200.e8_5663	PF3D7_0302200.e8	PF3D7_0302200	cytoadherence linked asexual protein 3.2 (CLAG3.2)	Pf4500-4	0.195651
144-V05C	BSPZV1-144	2 wks post final dose	675000	Not Protected	PF3D7_0406900.4o8_8241	PF3D7_0406900.4o8	PF3D7_0406900	conserved Plasmodium protein, unknown function	Pf4500-4	0.231361
144-V05C	BSPZV1-144	2 wks post final dose	675000	Not Protected	PF3D7_1304300.1o1_8411	PF3D7_1304300.1o1	PF3D7_1304300	conserved Plasmodium protein, unknown function	Pf4500-4	1.26805
144-V05C	BSPZV1-144	2 wks post final dose	675000	Not Protected	PF3D7_1202300.e20s1_7450	PF3D7_1202300.e20s1	PF3D7_1202300	dynein heavy chain, putative	Pf4500-4	0.0717553
144-V05C	BSPZV1-144	2 wks post final dose	675000	Not Protected	PF3D7_0728100.s1_6565	PF3D7_0728100.s1	PF3D7_0728100	conserved Plasmodium membrane protein, unknown function	Pf4500-4	-0.210947
144-V05C	BSPZV1-144	2 wks post final dose	675000	Not Protected	PF3D7_1461300_8863	PF3D7_1461300	PF3D7_1461300	40S ribosomal protein S28e, putative	Pf4500-4	0.209042
144-V05C	BSPZV1-144	2 wks post final dose	675000	Not Protected	PF3D7_0723900.e1s2_5176	PF3D7_0723900.e1s2	PF3D7_0723900	conserved Plasmodium protein, unknown function	Pf4500-4	0.308345
144-V05C	BSPZV1-144	2 wks post final dose	675000	Not Protected	PF3D7_1346300.e1s1_6876	PF3D7_1346300.e1s1	PF3D7_1346300	DNA/RNA-binding protein Alba 2 (ALBA2)	Pf4500-4	0.235293
144-V05C	BSPZV1-144	2 wks post final dose	675000	Not Protected	PF3D7_0511500.s4_7427	PF3D7_0511500.s4	PF3D7_0511500	RNA pseudouridylate synthase, putative	Pf4500-4	-0.243409
144-V05C	BSPZV1-144	2 wks post final dose	675000	Not Protected	PF3D7_1229100.s1_7690	PF3D7_1229100.s1	PF3D7_1229100	ABC transporter, (CT family) (MRP2)	Pf4500-4	0.904771
144-V05C	BSPZV1-144	2 wks post final dose	675000	Not Protected	PF3D7_1442000.1o2_8137	PF3D7_1442000.1o2	PF3D7_1442000	ADP-ribosylation factor, putative	Pf4500-4	-0.183129
144-V05C	BSPZV1-144	2 wks post final dose	675000	Not Protected	PF3D7_1408800.e1s1_7474	PF3D7_1408800.e1s1	PF3D7_1408800	conserved Plasmodium protein, unknown function	Pf4500-4	0.991695
144-V05C	BSPZV1-144	2 wks post final dose	675000	Not Protected	PF3D7_1306500.e2s1_8584	PF3D7_1306500.e2s1	PF3D7_1306500	MORN repeat protein, putative	Pf4500-4	0.259628
144-V05C	BSPZV1-144	2 wks post final dose	675000	Not Protected	PF3D7_0629100.1o1_9079	PF3D7_0629100.1o1	PF3D7_0629100	nicotinate phosphoribosyltransferase, putative	Pf4500-4	0.0894215
144-V05C	BSPZV1-144	2 wks post final dose	675000	Not Protected	PF3D7_1408400.e1s2_4888	PF3D7_1408400.e1s2	PF3D7_1408400	DNA-repair helicase, putative	Pf4500-4	0.590281
144-V05C	BSPZV1-144	2 wks post final dose	675000	Not Protected	PF3D7_0934800.e4s1_5104	PF3D7_0934800.e4s1	PF3D7_0934800	cAMP-dependent protein kinase catalytic subunit (PKAc)	Pf4500-4	-0.139623
144-V05C	BSPZV1-144	2 wks post final dose	675000	Not Protected	PF3D7_1100100.iso1.exon1.amp1_4545	PF3D7_1100100.iso1.exon1.amp1	PF3D7_1100100	erythrocyte membrane protein 1, PfEMP1	Pf4000-5	-0.215939
144-V05C	BSPZV1-144	2 wks post final dose	675000	Not Protected	PF3D7_0200400.iso1.exon1.amp1_1275	PF3D7_0200400.iso1.exon1.amp1	PF3D7_0200400	stevor	Pf4000-5	1.14653
144-V05C	BSPZV1-144	2 wks post final dose	675000	Not Protected	PF3D7_1122400.e1s1_7219	PF3D7_1122400.e1s1	PF3D7_1122400	conserved Plasmodium protein, unknown function	Pf4500-4	-0.00424311
144-V05C	BSPZV1-144	2 wks post final dose	675000	Not Protected	PF3D7_0814400.iso1.exon3.amp1_3332	PF3D7_0814400.iso1.exon3.amp1	PF3D7_0814400	phospholipase DDHD1, putative	Pf4000-5	0.0652232
144-V05C	BSPZV1-144	2 wks post final dose	675000	Not Protected	PF3D7_1233200.iso2.exon1.amp3_seg2_3172	PF3D7_1233200.iso2.exon1.amp3_seg2	PF3D7_1233200	conserved Plasmodium protein, unknown function	Pf4000-5	0.175567
144-V05C	BSPZV1-144	2 wks post final dose	675000	Not Protected	PF3D7_0318400.1o17_8776	PF3D7_0318400.1o17	PF3D7_0318400	conserved Plasmodium protein, unknown function	Pf4500-4	0.0686367
144-V05C	BSPZV1-144	2 wks post final dose	675000	Not Protected	PF3D7_0521100.iso1.exon5.amp1_1560	PF3D7_0521100.iso1.exon5.amp1	PF3D7_0521100	conserved Plasmodium protein, unknown function	Pf4000-5	0.0457914
144-V05C	BSPZV1-144	2 wks post final dose	675000	Not Protected	PF3D7_1235000.iso1.exon1.amp1_2127	PF3D7_1235000.iso1.exon1.amp1	PF3D7_1235000	conserved Plasmodium protein, unknown function	Pf4000-5	0.000198023
144-V05C	BSPZV1-144	2 wks post final dose	675000	Not Protected	PF3D7_1134600.iso1.exon1.amp2_4513	PF3D7_1134600.iso1.exon1.amp2	PF3D7_1134600	zinc finger protein, putative	Pf4000-5	-0.186352
144-V05C	BSPZV1-144	2 wks post final dose	675000	Not Protected	PF3D7_0408400.iso1.exon2.amp1_2366	PF3D7_0408400.iso1.exon2.amp1	PF3D7_0408400	conserved Plasmodium protein, unknown function	Pf4000-5	-0.0362872
144-V05C	BSPZV1-144	2 wks post final dose	675000	Not Protected	PF3D7_0618700.1o2_6708	PF3D7_0618700.1o2	PF3D7_0618700	transport protein particle (TRAPP) component, putative	Pf4500-4	3.30918
144-V05C	BSPZV1-144	2 wks post final dose	675000	Not Protected	PF3D7_0201000.iso1.exon1.amp1_3595	PF3D7_0201000.iso1.exon1.amp1	PF3D7_0201000	rifin	Pf4000-5	2.33874
144-V05C	BSPZV1-144	2 wks post final dose	675000	Not Protected	PF3D7_1239400.1o1_5240	PF3D7_1239400.1o1	PF3D7_1239400	conserved Plasmodium protein, unknown function	Pf4500-4	-0.697578
144-V05C	BSPZV1-144	2 wks post final dose	675000	Not Protected	PF3D7_0600400.iso1.exon2.amp1_1895	PF3D7_0600400.iso1.exon2.amp1	PF3D7_0600400	erythrocyte membrane protein 1 (PfEMP1)-like protein	Pf4000-5	0.977151
144-V05C	BSPZV1-144	2 wks post final dose	675000	Not Protected	PF3D7_1321900_7419	PF3D7_1321900	PF3D7_1321900	conserved Plasmodium protein, unknown function	Pf4500-4	0.0529421
144-V05C	BSPZV1-144	2 wks post final dose	675000	Not Protected	PF3D7_0321400.1o2_6996	PF3D7_0321400.1o2	PF3D7_0321400	protein kinase, putative	Pf4500-4	0.249133
144-V05C	BSPZV1-144	2 wks post final dose	675000	Not Protected	PF3D7_0310100.iso1.exon1.amp1_1584	PF3D7_0310100.iso1.exon1.amp1	PF3D7_0310100	calcium dependent protein kinase 3	Pf4000-5	-0.0107308
144-V05C	BSPZV1-144	2 wks post final dose	675000	Not Protected	PF3D7_0318300.e3s1_8536	PF3D7_0318300.e3s1	PF3D7_0318300	conserved Plasmodium protein, unknown function	Pf4500-4	-0.070447
144-V05C	BSPZV1-144	2 wks post final dose	675000	Not Protected	PF3D7_0626100.iso1.exon2.amp1_4098	PF3D7_0626100.iso1.exon2.amp1	PF3D7_0626100	oxidoreductase, short-chain dehydrogenase family, putative	Pf4000-5	0.0457914
144-V05C	BSPZV1-144	2 wks post final dose	675000	Not Protected	PF3D7_1138400.e1s5_8576	PF3D7_1138400.e1s5	PF3D7_1138400	guanylyl cyclase (GCalpha)	Pf4500-4	0.667731
144-V05C	BSPZV1-144	2 wks post final dose	675000	Not Protected	PF3D7_0809600.iso1.exon1.amp3_2829	PF3D7_0809600.iso1.exon1.amp3	PF3D7_0809600	peptidase family C50, putative	Pf4000-5	0.177845
144-V05C	BSPZV1-144	2 wks post final dose	675000	Not Protected	PF3D7_1356000.iso1.exon1.amp1_3140	PF3D7_1356000.iso1.exon1.amp1	PF3D7_1356000	conserved Plasmodium protein, unknown function	Pf4000-5	0.29285
144-V05C	BSPZV1-144	2 wks post final dose	675000	Not Protected	PF3D7_1466900.iso1.exon2.amp1_506	PF3D7_1466900.iso1.exon2.amp1	PF3D7_1466900	rhoptry protein, putative	Pf4000-5	0.556908
144-V05C	BSPZV1-144	2 wks post final dose	675000	Not Protected	PF3D7_0911300.e2_7977	PF3D7_0911300.e2	PF3D7_0911300	cysteine repeat modular protein 1 (CRMP1)	Pf4500-4	-0.13581
144-V05C	BSPZV1-144	2 wks post final dose	675000	Not Protected	PF3D7_1216200.e5s1_7411	PF3D7_1216200.e5s1	PF3D7_1216200	glycerol-3-phosphate dehydrogenase, putative	Pf4500-4	0.263163
144-V05C	BSPZV1-144	2 wks post final dose	675000	Not Protected	PF3D7_0520000.e3s1_9191	PF3D7_0520000.e3s1	PF3D7_0520000	40S ribosomal protein S9, putative	Pf4500-4	1.18358
144-V05C	BSPZV1-144	2 wks post final dose	675000	Not Protected	PF3D7_0615800.1o3_6232	PF3D7_0615800.1o3	PF3D7_0615800	conserved Plasmodium protein, unknown function	Pf4500-4	0.0059581
144-V05C	BSPZV1-144	2 wks post final dose	675000	Not Protected	PF3D7_1017300.1.2o2_6764	PF3D7_1017300.1.2o2	PF3D7_1017300.1	golgi re-assembly stacking protein 1 (GRASP1)	Pf4500-4	0.450422
144-V05C	BSPZV1-144	2 wks post final dose	675000	Not Protected	PF3D7_0100100.iso1.exon2.amp1_1871	PF3D7_0100100.iso1.exon2.amp1	PF3D7_0100100	erythrocyte membrane protein 1, PfEMP1	Pf4000-5	0.520934
144-V05C	BSPZV1-144	2 wks post final dose	675000	Not Protected	PF3D7_1436800.1o1_4960	PF3D7_1436800.1o1	PF3D7_1436800	ATP-dependent Clp protease proteolytic subunit, putative (ClpR)	Pf4500-4	0.114899
144-V05C	BSPZV1-144	2 wks post final dose	675000	Not Protected	PF3D7_1212000.e2s1_5966	PF3D7_1212000.e2s1	PF3D7_1212000	glutathione peroxidase (Trx-G1)	Pf4500-4	0.332406
144-V05C	BSPZV1-144	2 wks post final dose	675000	Not Protected	PF3D7_0425900.iso1.exon2.amp1_4457	PF3D7_0425900.iso1.exon2.amp1	PF3D7_0425900	rifin	Pf4000-5	0.035397
144-V05C	BSPZV1-144	2 wks post final dose	675000	Not Protected	PF3D7_0202600.iso2.exon1.amp1_2518	PF3D7_0202600.iso2.exon1.amp1	PF3D7_0202600	conserved Plasmodium protein, unknown function	Pf4000-5	0.7914
144-V05C	BSPZV1-144	2 wks post final dose	675000	Not Protected	PF3D7_1202300.e10s1_5439	PF3D7_1202300.e10s1	PF3D7_1202300	dynein heavy chain, putative	Pf4500-4	0.21536
144-V05C	BSPZV1-144	2 wks post final dose	675000	Not Protected	PF3D7_0414100.iso1.exon1.amp1_658	PF3D7_0414100.iso1.exon1.amp1	PF3D7_0414100	conserved Plasmodium membrane protein, unknown function	Pf4000-5	0.652203
144-V05C	BSPZV1-144	2 wks post final dose	675000	Not Protected	PF3D7_0628100.iso1.exon1.amp8_1672	PF3D7_0628100.iso1.exon1.amp8	PF3D7_0628100	HECT-domain (ubiquitin-transferase), putative	Pf4000-5	0.305401
144-V05C	BSPZV1-144	2 wks post final dose	675000	Not Protected	PF3D7_0313100.3o4_5343	PF3D7_0313100.3o4	PF3D7_0313100	ubiquitin-protein ligase, putative (HRD3)	Pf4500-4	-0.0217329
144-V05C	BSPZV1-144	2 wks post final dose	675000	Not Protected	PF3D7_1202300.e29s1_6301	PF3D7_1202300.e29s1	PF3D7_1202300	dynein heavy chain, putative	Pf4500-4	0.144647
144-V05C	BSPZV1-144	2 wks post final dose	675000	Not Protected	PF3D7_0925200.e1s1_6900	PF3D7_0925200.e1s1	PF3D7_0925200	rRNA processing and telomere maintaining methyltransferase, putative	Pf4500-4	0.162308
144-V05C	BSPZV1-144	2 wks post final dose	675000	Not Protected	PF3D7_1468400.1o1_7068	PF3D7_1468400.1o1	PF3D7_1468400	zinc finger protein, putative (D13)	Pf4500-4	0.0995229
144-V05C	BSPZV1-144	2 wks post final dose	675000	Not Protected	PF3D7_0926800.iso1.exon1.amp1_2853	PF3D7_0926800.iso1.exon1.amp1	PF3D7_0926800	conserved Plasmodium protein, unknown function	Pf4000-5	0.507488
144-V05C	BSPZV1-144	2 wks post final dose	675000	Not Protected	PF3D7_0318500.iso1.exon1.amp4_222	PF3D7_0318500.iso1.exon1.amp4	PF3D7_0318500	conserved Plasmodium protein, unknown function	Pf4000-5	0.0419503
144-V05C	BSPZV1-144	2 wks post final dose	675000	Not Protected	PF3D7_0204600.iso1.exon1.amp2_seg2_1153	PF3D7_0204600.iso1.exon1.amp2_seg2	PF3D7_0204600	conserved Plasmodium protein, unknown function	Pf4000-5	0.727192
144-V05C	BSPZV1-144	2 wks post final dose	675000	Not Protected	PF3D7_0406800.iso1.exon5.amp1_3556	PF3D7_0406800.iso1.exon5.amp1	PF3D7_0406800	conserved Plasmodium protein, unknown function	Pf4000-5	-0.61679
144-V05C	BSPZV1-144	2 wks post final dose	675000	Not Protected	PF3D7_1113900.e1s1_5447	PF3D7_1113900.e1s1	PF3D7_1113900	mitogen-activated protein kinase 2 (MAP2)	Pf4500-4	0.0359481
144-V05C	BSPZV1-144	2 wks post final dose	675000	Not Protected	PF3D7_0621200.iso1.exon1.amp1_1855	PF3D7_0621200.iso1.exon1.amp1	PF3D7_0621200	pyridoxine biosynthesis protein PDX1	Pf4000-5	0.357016
144-V05C	BSPZV1-144	2 wks post final dose	675000	Not Protected	PF3D7_1326200.iso1.exon3.amp1_3867	PF3D7_1326200.iso1.exon3.amp1	PF3D7_1326200	conserved Plasmodium protein, unknown function	Pf4000-5	0.354695
144-V05C	BSPZV1-144	2 wks post final dose	675000	Not Protected	PF3D7_1426600.iso1.exon1.amp1_4585	PF3D7_1426600.iso1.exon1.amp1	PF3D7_1426600	conserved Plasmodium protein, unknown function	Pf4000-5	-0.106595
144-V05C	BSPZV1-144	2 wks post final dose	675000	Not Protected	PF3D7_1308500.iso1.exon1.amp1_3021	PF3D7_1308500.iso1.exon1.amp1	PF3D7_1308500	conserved Plasmodium protein, unknown function	Pf4000-5	0.65472
144-V05C	BSPZV1-144	2 wks post final dose	675000	Not Protected	PF3D7_0309200.iso1.exon3.amp2_2542	PF3D7_0309200.iso1.exon3.amp2	PF3D7_0309200	serine/threonine protein kinase, putative	Pf4000-5	0.607683
144-V05C	BSPZV1-144	2 wks post final dose	675000	Not Protected	PF3D7_0729100.iso1.exon1.amp1_3715	PF3D7_0729100.iso1.exon1.amp1	PF3D7_0729100	conserved Plasmodium protein, unknown function	Pf4000-5	0.209009
144-V05C	BSPZV1-144	2 wks post final dose	675000	Not Protected	PF3D7_0704100.iso1.exon1.amp1_2255	PF3D7_0704100.iso1.exon1.amp1	PF3D7_0704100	conserved Plasmodium membrane protein, unknown function	Pf4000-5	0.324025
144-V05C	BSPZV1-144	2 wks post final dose	675000	Not Protected	PF3D7_1005500.e2s2_8369	PF3D7_1005500.e2s2	PF3D7_1005500	regulator of nonsense transcripts, putative	Pf4500-4	-0.864967
144-V05C	BSPZV1-144	2 wks post final dose	675000	Not Protected	PF3D7_0718300.e4s1_4841	PF3D7_0718300.e4s1	PF3D7_0718300	cysteine repeat modular protein 2 (CRMP2)	Pf4500-4	0.392033
144-V05C	BSPZV1-144	2 wks post final dose	675000	Not Protected	PF3D7_1029800.iso1.exon1.amp1_722	PF3D7_1029800.iso1.exon1.amp1	PF3D7_1029800	RAP protein, putative	Pf4000-5	0.426279
144-V05C	BSPZV1-144	2 wks post final dose	675000	Not Protected	PF3D7_0314600.iso1.exon1.amp1_397	PF3D7_0314600.iso1.exon1.amp1	PF3D7_0314600	conserved Plasmodium protein, unknown function	Pf4000-5	0.144022
144-V05C	BSPZV1-144	2 wks post final dose	675000	Not Protected	PF3D7_0928700.iso1.exon1.amp2_1329	PF3D7_0928700.iso1.exon1.amp2	PF3D7_0928700	conserved Plasmodium protein, unknown function	Pf4000-5	0.136117
144-V05C	BSPZV1-144	2 wks post final dose	675000	Not Protected	PF3D7_1128400.iso1.exon10.amp1_2350	PF3D7_1128400.iso1.exon10.amp1	PF3D7_1128400	geranylgeranyl pyrophosphate synthase, putative	Pf4000-5	0.184828
144-V05C	BSPZV1-144	2 wks post final dose	675000	Not Protected	PF3D7_1121000.1o6_7570	PF3D7_1121000.1o6	PF3D7_1121000	zinc finger, DHHC-type, putative	Pf4500-4	-0.0341031
144-V05C	BSPZV1-144	2 wks post final dose	675000	Not Protected	PF3D7_1420400.e1s1_6852	PF3D7_1420400.e1s1	PF3D7_1420400	glycyl-tRNA synthetase,glycine--tRNA ligase (GlyRS)	Pf4500-4	2.72612
144-V05C	BSPZV1-144	2 wks post final dose	675000	Not Protected	PF3D7_1124900.e2s1_6253	PF3D7_1124900.e2s1	PF3D7_1124900	60S ribosomal protein L35, putative	Pf4500-4	-0.027414
144-V05C	BSPZV1-144	2 wks post final dose	675000	Not Protected	PF3D7_1235000.iso1.exon3.amp1_650	PF3D7_1235000.iso1.exon3.amp1	PF3D7_1235000	conserved Plasmodium protein, unknown function	Pf4000-5	1.76572
144-V05C	BSPZV1-144	2 wks post final dose	675000	Not Protected	PF3D7_0908700.iso1.exon6.amp1_4386	PF3D7_0908700.iso1.exon6.amp1	PF3D7_0908700	tRNA pseudouridine synthase, putative	Pf4000-5	0.297691
144-V05C	BSPZV1-144	2 wks post final dose	675000	Not Protected	PF3D7_1115300.e1s1_7187	PF3D7_1115300.e1s1	PF3D7_1115300	cysteine proteinase falcipain 2b (FP2B)	Pf4500-4	1.33653
144-V05C	BSPZV1-144	2 wks post final dose	675000	Not Protected	PF3D7_0909100.1o1_4745	PF3D7_0909100.1o1	PF3D7_0909100	conserved Plasmodium membrane protein, unknown function	Pf4500-4	0.139935
144-V05C	BSPZV1-144	2 wks post final dose	675000	Not Protected	PF3D7_0934600.iso1.exon2.amp1_1225	PF3D7_0934600.iso1.exon2.amp1	PF3D7_0934600	conserved Plasmodium protein, unknown function	Pf4000-5	0.200075
144-V05C	BSPZV1-144	2 wks post final dose	675000	Not Protected	PF3D7_1344500.2o3_8432	PF3D7_1344500.2o3	PF3D7_1344500	conserved Plasmodium protein, unknown function	Pf4500-4	-0.475408
144-V05C	BSPZV1-144	2 wks post final dose	675000	Not Protected	PF3D7_0302200.9o9_6812	PF3D7_0302200.9o9	PF3D7_0302200	cytoadherence linked asexual protein 3.2 (CLAG3.2)	Pf4500-4	0.674384
144-V05C	BSPZV1-144	2 wks post final dose	675000	Not Protected	PF3D7_1362500.iso1.exon2.amp1_2159	PF3D7_1362500.iso1.exon2.amp1	PF3D7_1362500	exonuclease, putative	Pf4000-5	0.247375
144-V05C	BSPZV1-144	2 wks post final dose	675000	Not Protected	PF3D7_0419000.iso1.exon3.amp1_661	PF3D7_0419000.iso1.exon3.amp1	PF3D7_0419000	conserved Plasmodium protein, unknown function	Pf4000-5	0.448501
144-V05C	BSPZV1-144	2 wks post final dose	675000	Not Protected	PF3D7_0905300.s7_8001	PF3D7_0905300.s7	PF3D7_0905300	dynein heavy chain, putative	Pf4500-4	0.440238
144-V05C	BSPZV1-144	2 wks post final dose	675000	Not Protected	PF3D7_0909600.3o3_8193	PF3D7_0909600.3o3	PF3D7_0909600	conserved Plasmodium protein, unknown function	Pf4500-4	0.407797
144-V05C	BSPZV1-144	2 wks post final dose	675000	Not Protected	PF3D7_0832900.iso1.exon3.amp1_986	PF3D7_0832900.iso1.exon3.amp1	PF3D7_0832900	stevor	Pf4000-5	1.28637
144-V05C	BSPZV1-144	2 wks post final dose	675000	Not Protected	PF3D7_0618900.iso2.exon2.amp1_2167	PF3D7_0618900.iso2.exon2.amp1	PF3D7_0618900	N-acetylglucosamine transferase (GPI1)	Pf4000-5	1.50658
144-V05C	BSPZV1-144	2 wks post final dose	675000	Not Protected	PF3D7_1026800.e2s1_5160	PF3D7_1026800.e2s1	PF3D7_1026800	40S ribosomal protein S2B, putative	Pf4500-4	-0.909493
144-V05C	BSPZV1-144	2 wks post final dose	675000	Not Protected	PF3D7_1414700.s2_8552	PF3D7_1414700.s2	PF3D7_1414700	ubiquitin carboxyl-terminal hydrolase, putative	Pf4500-4	-0.0244727
144-V05C	BSPZV1-144	2 wks post final dose	675000	Not Protected	PF3D7_1013800.3o4_5870	PF3D7_1013800.3o4	PF3D7_1013800	conserved Plasmodium protein, unknown function	Pf4500-4	0.246214
144-V05C	BSPZV1-144	2 wks post final dose	675000	Not Protected	PF3D7_0519600.1o1_6780	PF3D7_0519600.1o1	PF3D7_0519600	conserved Plasmodium protein, unknown function	Pf4500-4	0.0236858
144-V05C	BSPZV1-144	2 wks post final dose	675000	Not Protected	PF3D7_1028800.iso1.exon2.amp1_3548	PF3D7_1028800.iso1.exon2.amp1	PF3D7_1028800	conserved Plasmodium protein, unknown function	Pf4000-5	-0.260068
144-V05C	BSPZV1-144	2 wks post final dose	675000	Not Protected	PF3D7_1222700.1o1_8121	PF3D7_1222700.1o1	PF3D7_1222700	glideosome-associated protein 45 (GAP45)	Pf4500-4	0.194474
144-V05C	BSPZV1-144	2 wks post final dose	675000	Not Protected	PF3D7_0704100.iso1.exon1.amp4_171	PF3D7_0704100.iso1.exon1.amp4	PF3D7_0704100	conserved Plasmodium membrane protein, unknown function	Pf4000-5	0.350043
144-V05C	BSPZV1-144	2 wks post final dose	675000	Not Protected	PF3D7_0425800.iso1.exon1.amp1_3955	PF3D7_0425800.iso1.exon1.amp1	PF3D7_0425800	erythrocyte membrane protein 1, PfEMP1	Pf4000-5	1.24721
144-V05C	BSPZV1-144	2 wks post final dose	675000	Not Protected	PF3D7_0920400.s2_5415	PF3D7_0920400.s2	PF3D7_0920400	conserved Plasmodium protein, unknown function	Pf4500-4	-0.402064
144-V05C	BSPZV1-144	2 wks post final dose	675000	Not Protected	PF3D7_0713900.e1s3_8249	PF3D7_0713900.e1s3	PF3D7_0713900	conserved Plasmodium protein, unknown function	Pf4500-4	1.12385
144-V05C	BSPZV1-144	2 wks post final dose	675000	Not Protected	PF3D7_0629500.1o2_8488	PF3D7_0629500.1o2	PF3D7_0629500	amino acid transporter, putative	Pf4500-4	2.25383
144-V05C	BSPZV1-144	2 wks post final dose	675000	Not Protected	PF3D7_1247000.iso2.exon1.amp1_2374	PF3D7_1247000.iso2.exon1.amp1	PF3D7_1247000	DNA replication origin binding protein, putative	Pf4000-5	0.191605
144-V05C	BSPZV1-144	2 wks post final dose	675000	Not Protected	PF3D7_1035300.iso1.exon1.amp2_3364	PF3D7_1035300.iso1.exon1.amp2	PF3D7_1035300	glutamate-rich protein	Pf4000-5	0.21226
144-V05C	BSPZV1-144	2 wks post final dose	675000	Not Protected	PF3D7_1140700.e1s3_8073	PF3D7_1140700.e1s3	PF3D7_1140700	conserved Plasmodium protein, unknown function	Pf4500-4	-0.0726732
144-V05C	BSPZV1-144	2 wks post final dose	675000	Not Protected	PF3D7_0604500.iso1.exon1.amp1_seg2_2311	PF3D7_0604500.iso1.exon1.amp1_seg2	PF3D7_0604500	conserved Plasmodium protein, unknown function	Pf4000-5	0.744666
144-V05C	BSPZV1-144	2 wks post final dose	675000	Not Protected	PF3D7_0731600.e1s1_6357	PF3D7_0731600.e1s1	PF3D7_0731600	acyl-coA synthetase, PfACS5 (ACS5)	Pf4500-4	1.02709
144-V05C	BSPZV1-144	2 wks post final dose	675000	Not Protected	PF3D7_0803700.e1s1_6030	PF3D7_0803700.e1s1	PF3D7_0803700	tubulin gamma chain (g-tub)	Pf4500-4	-1.49917
144-V05C	BSPZV1-144	2 wks post final dose	675000	Not Protected	PF3D7_1464900.iso1.exon1.amp1_3045	PF3D7_1464900.iso1.exon1.amp1	PF3D7_1464900	ATP-dependent protease la, putative	Pf4000-5	1.84308
144-V05C	BSPZV1-144	2 wks post final dose	675000	Not Protected	PF3D7_0521300.iso1.exon3.amp1_2837	PF3D7_0521300.iso1.exon3.amp1	PF3D7_0521300	conserved Plasmodium protein, unknown function	Pf4000-5	0.322126
144-V05C	BSPZV1-144	2 wks post final dose	675000	Not Protected	PF3D7_1233300.s2_5950	PF3D7_1233300.s2	PF3D7_1233300	pentatricopeptide repeat protein, putative	Pf4500-4	0.104905
144-V05C	BSPZV1-144	2 wks post final dose	675000	Not Protected	PF3D7_0718000.e3s1_8057	PF3D7_0718000.e3s1	PF3D7_0718000	dynein heavy chain, putative	Pf4500-4	-0.0850814
144-V05C	BSPZV1-144	2 wks post final dose	675000	Not Protected	PF3D7_1437100.iso1.exon1.amp1_2686	PF3D7_1437100.iso1.exon1.amp1	PF3D7_1437100	conserved Plasmodium protein, unknown function	Pf4000-5	0.130702
144-V05C	BSPZV1-144	2 wks post final dose	675000	Not Protected	PF3D7_0617200.e3_8265	PF3D7_0617200.e3	PF3D7_0617200	conserved Plasmodium protein, unknown function	Pf4500-4	0.136961
144-V05C	BSPZV1-144	2 wks post final dose	675000	Not Protected	PF3D7_0324900.iso1.exon2.amp1_2239	PF3D7_0324900.iso1.exon2.amp1	PF3D7_0324900	erythrocyte membrane protein 1, PfEMP1	Pf4000-5	0.425837
144-V05C	BSPZV1-144	2 wks post final dose	675000	Not Protected	PF3D7_1313900.1o1_8177	PF3D7_1313900.1o1	PF3D7_1313900	conserved Plasmodium protein, unknown function	Pf4500-4	0.0333158
144-V05C	BSPZV1-144	2 wks post final dose	675000	Not Protected	PF3D7_0908500.e15s1_7738	PF3D7_0908500.e15s1	PF3D7_0908500	conserved Plasmodium protein, unknown function	Pf4500-4	0.0291696
144-V05C	BSPZV1-144	2 wks post final dose	675000	Not Protected	PF3D7_1216200.e2s1_7746	PF3D7_1216200.e2s1	PF3D7_1216200	glycerol-3-phosphate dehydrogenase, putative	Pf4500-4	-1.63314
144-V05C	BSPZV1-144	2 wks post final dose	675000	Not Protected	PF3D7_0710200.iso1.exon1.amp2_seg1_3742	PF3D7_0710200.iso1.exon1.amp2_seg1	PF3D7_0710200	conserved Plasmodium protein, unknown function	Pf4000-5	0.0992585
144-V05C	BSPZV1-144	2 wks post final dose	675000	Not Protected	PF3D7_1448300.s2_6278	PF3D7_1448300.s2	PF3D7_1448300	conserved Plasmodium protein, unknown function	Pf4500-4	0.0181812
144-V05C	BSPZV1-144	2 wks post final dose	675000	Not Protected	PF3D7_0912200.1o1_7020	PF3D7_0912200.1o1	PF3D7_0912200	conserved Plasmodium membrane protein, unknown function	Pf4500-4	0.345045
144-V05C	BSPZV1-144	2 wks post final dose	675000	Not Protected	PF3D7_0828900.e4s1_5711	PF3D7_0828900.e4s1	PF3D7_0828900	conserved Plasmodium protein, unknown function	Pf4500-4	0.0342565
144-V05C	BSPZV1-144	2 wks post final dose	675000	Not Protected	PF3D7_0522400.e3s6_8872	PF3D7_0522400.e3s6	PF3D7_0522400	conserved Plasmodium protein, unknown function	Pf4500-4	-0.328636
144-V05C	BSPZV1-144	2 wks post final dose	675000	Not Protected	PF3D7_0528800.iso1.exon1.amp1_1608	PF3D7_0528800.iso1.exon1.amp1	PF3D7_0528800	nucleolar preribosomal GTPase, putative	Pf4000-5	0.0979642
144-V05C	BSPZV1-144	2 wks post final dose	675000	Not Protected	PF3D7_1143700.3o6_4721	PF3D7_1143700.3o6	PF3D7_1143700	conserved Plasmodium protein, unknown function	Pf4500-4	0.278169
144-V05C	BSPZV1-144	2 wks post final dose	675000	Not Protected	PF3D7_0412300.1o1_8201	PF3D7_0412300.1o1	PF3D7_0412300	phosphopantothenoylcysteine synthetase, putative	Pf4500-4	-0.0459838
144-V05C	BSPZV1-144	2 wks post final dose	675000	Not Protected	PF3D7_0305900.1o1_6685	PF3D7_0305900.1o1	PF3D7_0305900	conserved Plasmodium protein, unknown function	Pf4500-4	0.0572057
144-V05C	BSPZV1-144	2 wks post final dose	675000	Not Protected	PF3D7_1200100.iso1.exon1.amp2_794	PF3D7_1200100.iso1.exon1.amp2	PF3D7_1200100	erythrocyte membrane protein 1, PfEMP1	Pf4000-5	0.749974
144-V05C	BSPZV1-144	2 wks post final dose	675000	Not Protected	PF3D7_0901900.1o2_7028	PF3D7_0901900.1o2	PF3D7_0901900	probable protein, unknown function	Pf4500-4	0.0644068
144-V05C	BSPZV1-144	2 wks post final dose	675000	Not Protected	PF3D7_0816600.e1s1_6325	PF3D7_0816600.e1s1	PF3D7_0816600	ClpB protein, putative (ClpB1)	Pf4500-4	0.208542
144-V05C	BSPZV1-144	2 wks post final dose	675000	Not Protected	PF3D7_0626700.1o1_4697	PF3D7_0626700.1o1	PF3D7_0626700	conserved protein, unknown function	Pf4500-4	-0.421278
144-V05C	BSPZV1-144	2 wks post final dose	675000	Not Protected	PF3D7_0609000.iso1.exon1.amp2_4274	PF3D7_0609000.iso1.exon1.amp2	PF3D7_0609000	conserved Plasmodium protein, unknown function	Pf4000-5	1.13341
144-V05C	BSPZV1-144	2 wks post final dose	675000	Not Protected	PF3D7_0912500.2o7_6421	PF3D7_0912500.2o7	PF3D7_0912500	conserved Plasmodium protein, unknown function	Pf4500-4	0.976898
144-V05C	BSPZV1-144	2 wks post final dose	675000	Not Protected	PF3D7_0811200.iso1.exon2.amp1_1531	PF3D7_0811200.iso1.exon2.amp1	PF3D7_0811200	conserved protein, unknown function	Pf4000-5	0.42981
144-V05C	BSPZV1-144	2 wks post final dose	675000	Not Protected	PF3D7_1014800.5o11_8209	PF3D7_1014800.5o11	PF3D7_1014800	conserved Plasmodium protein, unknown function	Pf4500-4	0.0157067
144-V05C	BSPZV1-144	2 wks post final dose	675000	Not Protected	PF3D7_0528000.1o1_8696	PF3D7_0528000.1o1	PF3D7_0528000	conserved Plasmodium protein, unknown function	Pf4500-4	-1.86392
144-V05C	BSPZV1-144	2 wks post final dose	675000	Not Protected	PF3D7_1011000.iso1.exon1.amp1_3237	PF3D7_1011000.iso1.exon1.amp1	PF3D7_1011000	inner membrane complex protein, putative	Pf4000-5	-0.980922
144-V05C	BSPZV1-144	2 wks post final dose	675000	Not Protected	PF3D7_0604000.iso1.exon1.amp1_1983	PF3D7_0604000.iso1.exon1.amp1	PF3D7_0604000	conserved Plasmodium protein, unknown function	Pf4000-5	0.460637
144-V05C	BSPZV1-144	2 wks post final dose	675000	Not Protected	PF3D7_0530000.iso1.exon1.amp1_76	PF3D7_0530000.iso1.exon1.amp1	PF3D7_0530000	conserved Plasmodium protein, unknown function	Pf4000-5	0.257679
144-V05C	BSPZV1-144	2 wks post final dose	675000	Not Protected	PF3D7_0624500.iso1.exon1.amp1_1536	PF3D7_0624500.iso1.exon1.amp1	PF3D7_0624500	anaphase promoting complex subunit, putative	Pf4000-5	0.440646
144-V05C	BSPZV1-144	2 wks post final dose	675000	Not Protected	PF3D7_1477800.iso1.exon1.amp1_2398	PF3D7_1477800.iso1.exon1.amp1	PF3D7_1477800	acyl-CoA binding protein	Pf4000-5	0.358407
144-V05C	BSPZV1-144	2 wks post final dose	675000	Not Protected	PF3D7_1333400.1o1_6118	PF3D7_1333400.1o1	PF3D7_1333400	conserved protein, unknown function	Pf4500-4	-0.189924
144-V05C	BSPZV1-144	2 wks post final dose	675000	Not Protected	PF3D7_1317100.iso1.exon1.amp1_1465	PF3D7_1317100.iso1.exon1.amp1	PF3D7_1317100	minchromosome maintenance (MCM) complex subunit	Pf4000-5	0.351906
144-V05C	BSPZV1-144	2 wks post final dose	675000	Not Protected	PF3D7_1340200.iso1.exon1.amp1_short_3739	PF3D7_1340200.iso1.exon1.amp1_short	PF3D7_1340200	conserved Plasmodium protein, unknown function	Pf4000-5	0.222817
144-V05C	BSPZV1-144	2 wks post final dose	675000	Not Protected	PF3D7_1308800.1o13_6166	PF3D7_1308800.1o13	PF3D7_1308800	recombinase, putative	Pf4500-4	-0.240675
144-V05C	BSPZV1-144	2 wks post final dose	675000	Not Protected	PF3D7_0935100.iso1.exon1.amp1_3811	PF3D7_0935100.iso1.exon1.amp1	PF3D7_0935100	conserved protein, unknown function	Pf4000-5	-0.27772
144-V05C	BSPZV1-144	2 wks post final dose	675000	Not Protected	PF3D7_1363800.1o13_5894	PF3D7_1363800.1o13	PF3D7_1363800	conserved Plasmodium membrane protein, unknown function	Pf4500-4	0.306944
144-V05C	BSPZV1-144	2 wks post final dose	675000	Not Protected	PF3D7_1474400.iso1.exon4.amp1_938	PF3D7_1474400.iso1.exon4.amp1	PF3D7_1474400	conserved Plasmodium protein, unknown function	Pf4000-5	0.231612
144-V05C	BSPZV1-144	2 wks post final dose	675000	Not Protected	PF3D7_1322200.e1s2_9159	PF3D7_1322200.e1s2	PF3D7_1322200	conserved Plasmodium protein, unknown function	Pf4500-4	-0.0108255
144-V05C	BSPZV1-144	2 wks post final dose	675000	Not Protected	PF3D7_0404900.1o1_7299	PF3D7_0404900.1o1	PF3D7_0404900	6-cysteine protein (P41)	Pf4500-4	-1.06681
144-V05C	BSPZV1-144	2 wks post final dose	675000	Not Protected	PF3D7_1031800.iso1.exon1.amp1_698	PF3D7_1031800.iso1.exon1.amp1	PF3D7_1031800	conserved Plasmodium protein, unknown function	Pf4000-5	0.611705
144-V05C	BSPZV1-144	2 wks post final dose	675000	Not Protected	PF3D7_1438600.1o1_6126	PF3D7_1438600.1o1	PF3D7_1438600	conserved Plasmodium protein, unknown function	Pf4500-4	0.0508984
144-V05C	BSPZV1-144	2 wks post final dose	675000	Not Protected	PF3D7_0615000.1o1_7547	PF3D7_0615000.1o1	PF3D7_0615000	conserved Plasmodium protein, unknown function	Pf4500-4	-0.0990404
144-V05C	BSPZV1-144	2 wks post final dose	675000	Not Protected	PF3D7_1462500.iso1.exon13.amp1_2654	PF3D7_1462500.iso1.exon13.amp1	PF3D7_1462500	conserved Plasmodium protein, unknown function	Pf4000-5	0.270538
144-V05C	BSPZV1-144	2 wks post final dose	675000	Not Protected	PF3D7_0808400.1o1_4673	PF3D7_0808400.1o1	PF3D7_0808400	coatomer epsilon subunit, putative	Pf4500-4	0.212869
144-V05C	BSPZV1-144	2 wks post final dose	675000	Not Protected	PF3D7_0716700.iso1.exon1.amp1_4354	PF3D7_0716700.iso1.exon1.amp1	PF3D7_0716700	conserved Plasmodium protein, unknown function	Pf4000-5	0.346777
144-V05C	BSPZV1-144	2 wks post final dose	675000	Not Protected	PF3D7_1015200.iso1.exon3.amp1_1792	PF3D7_1015200.iso1.exon3.amp1	PF3D7_1015200	cysteine--tRNA ligase, putative	Pf4000-5	0.188134
144-V05C	BSPZV1-144	2 wks post final dose	675000	Not Protected	PF3D7_1352200.iso1.exon1.amp1_4075	PF3D7_1352200.iso1.exon1.amp1	PF3D7_1352200	conserved Plasmodium protein, unknown function	Pf4000-5	-0.197206
144-V05C	BSPZV1-144	2 wks post final dose	675000	Not Protected	PF3D7_0217000.1o4_7595	PF3D7_0217000.1o4	PF3D7_0217000	conserved Plasmodium membrane protein, unknown function	Pf4500-4	-0.0238851
144-V05C	BSPZV1-144	2 wks post final dose	675000	Not Protected	PF3D7_0113800.3o4_7092	PF3D7_0113800.3o4	PF3D7_0113800	DBL containing protein, unknown function	Pf4500-4	0.210874
144-V05C	BSPZV1-144	2 wks post final dose	675000	Not Protected	PF3D7_0707500.iso1.exon1.amp2_467	PF3D7_0707500.iso1.exon1.amp2	PF3D7_0707500	conserved Plasmodium protein, unknown function	Pf4000-5	1.71373
144-V05C	BSPZV1-144	2 wks post final dose	675000	Not Protected	PF3D7_1342900.iso1.exon1.amp2_3128	PF3D7_1342900.iso1.exon1.amp2	PF3D7_1342900	transcription factor with AP2 domain(s)	Pf4000-5	-0.0141256
144-V05C	BSPZV1-144	2 wks post final dose	675000	Not Protected	PF3D7_0702300.e2_6828	PF3D7_0702300.e2	PF3D7_0702300	sporozoite threonine and asparagine-rich protein (STARP)	Pf4500-4	0.0761465
144-V05C	BSPZV1-144	2 wks post final dose	675000	Not Protected	PF3D7_0419100.iso1.exon2.amp1_387	PF3D7_0419100.iso1.exon2.amp1	PF3D7_0419100	conserved Plasmodium protein, unknown function	Pf4000-5	0.132871
144-V05C	BSPZV1-144	2 wks post final dose	675000	Not Protected	PF3D7_0207000.e1_7116	PF3D7_0207000.e1	PF3D7_0207000	merozoite surface protein 4 (MSP4)	Pf4500-4	-0.0182179
144-V05C	BSPZV1-144	2 wks post final dose	675000	Not Protected	PF3D7_1466900.iso1.exon1.amp1_2662	PF3D7_1466900.iso1.exon1.amp1	PF3D7_1466900	rhoptry protein, putative	Pf4000-5	0.277252
144-V05C	BSPZV1-144	2 wks post final dose	675000	Not Protected	PF3D7_0210000.iso1.exon1.amp1_4125	PF3D7_0210000.iso1.exon1.amp1	PF3D7_0210000	secretory complex protein 61 gamma subunit	Pf4000-5	0.42731
144-V05C	BSPZV1-144	2 wks post final dose	675000	Not Protected	PF3D7_0833100.iso1.exon3.amp1_4170	PF3D7_0833100.iso1.exon3.amp1	PF3D7_0833100	rifin	Pf4000-5	0.655977
144-V05C	BSPZV1-144	2 wks post final dose	675000	Not Protected	PF3D7_1452800.2o4_6110	PF3D7_1452800.2o4	PF3D7_1452800	conserved Plasmodium protein, unknown function	Pf4500-4	0.0827083
144-V05C	BSPZV1-144	2 wks post final dose	675000	Not Protected	PF3D7_1338100.iso1.exon2.amp1_2111	PF3D7_1338100.iso1.exon2.amp1	PF3D7_1338100	proteasome regulatory subunit, putative	Pf4000-5	0.248376
144-V05C	BSPZV1-144	2 wks post final dose	675000	Not Protected	PF3D7_0106000.1o1_7371	PF3D7_0106000.1o1	PF3D7_0106000	conserved Plasmodium protein, unknown function	Pf4500-4	-0.409463
144-V05C	BSPZV1-144	2 wks post final dose	675000	Not Protected	PF3D7_0709300.iso1.exon1.amp1_1968	PF3D7_0709300.iso1.exon1.amp1	PF3D7_0709300	Cg2 protein	Pf4000-5	0.166776
144-V05C	BSPZV1-144	2 wks post final dose	675000	Not Protected	PF3D7_0604900.iso1.exon2.amp1_3516	PF3D7_0604900.iso1.exon2.amp1	PF3D7_0604900	conserved Plasmodium protein, unknown function	Pf4000-5	-0.604095
144-V05C	BSPZV1-144	2 wks post final dose	675000	Not Protected	PF3D7_1446500.iso1.exon1.amp3_1106	PF3D7_1446500.iso1.exon1.amp3	PF3D7_1446500	conserved Plasmodium protein, unknown function	Pf4000-5	0.796425
144-V05C	BSPZV1-144	2 wks post final dose	675000	Not Protected	PF3D7_1372700.iso1.exon2.amp1_3891	PF3D7_1372700.iso1.exon2.amp1	PF3D7_1372700	rifin	Pf4000-5	1.20609
144-V05C	BSPZV1-144	2 wks post final dose	675000	Not Protected	PF3D7_1311000 (renamed)_8744	PF3D7_1311000 (renamed)	PF3D7_1311000	conserved Plasmodium protein, unknown function	Pf4500-4	0.769302
144-V05C	BSPZV1-144	2 wks post final dose	675000	Not Protected	PF3D7_1356800.e1s2_8297	PF3D7_1356800.e1s2	PF3D7_1356800	serine/threonine protein kinase, putative (ARK3)	Pf4500-4	0.700336
144-V05C	BSPZV1-144	2 wks post final dose	675000	Not Protected	PF3D7_1003300.1o1_4657	PF3D7_1003300.1o1	PF3D7_1003300	N-acetyltransferase, putative	Pf4500-4	0.377282
144-V05C	BSPZV1-144	2 wks post final dose	675000	Not Protected	PF3D7_0718100.iso1.exon1.amp1_2231	PF3D7_0718100.iso1.exon1.amp1	PF3D7_0718100	exported serine/threonine protein kinase	Pf4000-5	0.485031
144-V05C	BSPZV1-144	2 wks post final dose	675000	Not Protected	PF3D7_1114400.iso1.exon1.amp1_4194	PF3D7_1114400.iso1.exon1.amp1	PF3D7_1114400	conserved Plasmodium protein, unknown function	Pf4000-5	-0.0716371
144-V05C	BSPZV1-144	2 wks post final dose	675000	Not Protected	PF3D7_0711500.e1s1_6924	PF3D7_0711500.e1s1	PF3D7_0711500	regulator of chromosome condensation, putative	Pf4500-4	0.273078
144-V05C	BSPZV1-144	2 wks post final dose	675000	Not Protected	PF3D7_0515600.e8s1_6605	PF3D7_0515600.e8s1	PF3D7_0515600	conserved Plasmodium protein, unknown function	Pf4500-4	-1.18357
144-V05C	BSPZV1-144	2 wks post final dose	675000	Not Protected	PF3D7_0206200.1o1_7052	PF3D7_0206200.1o1	PF3D7_0206200	metabolite/drug transporter, putative	Pf4500-4	0.964713
144-V05C	BSPZV1-144	2 wks post final dose	675000	Not Protected	PF3D7_0214300.iso1.exon1.amp3_1632	PF3D7_0214300.iso1.exon1.amp3	PF3D7_0214300	conserved Plasmodium protein, unknown function	Pf4000-5	0.265606
144-V05C	BSPZV1-144	2 wks post final dose	675000	Not Protected	PF3D7_1402300.1o1_7339	PF3D7_1402300.1o1	PF3D7_1402300	26S proteasome regulatory subunit (RPN6)	Pf4500-4	0.0597948
144-V05C	BSPZV1-144	2 wks post final dose	675000	Not Protected	PF3D7_1249200.iso1.exon1.amp1_1832	PF3D7_1249200.iso1.exon1.amp1	PF3D7_1249200	conserved Plasmodium protein, unknown function	Pf4000-5	0.342256
144-V05C	BSPZV1-144	2 wks post final dose	675000	Not Protected	PF3D7_1037800.1o17_9055	PF3D7_1037800.1o17	PF3D7_1037800	dynein intermediate chain, putative	Pf4500-4	0.105801
144-V05C	BSPZV1-144	2 wks post final dose	675000	Not Protected	PF3D7_0519800.e2s1_6014	PF3D7_0519800.e2s1	PF3D7_0519800	conserved protein, unknown function	Pf4500-4	0.337901
144-V05C	BSPZV1-144	2 wks post final dose	675000	Not Protected	PF3D7_1413500.1o1_6134	PF3D7_1413500.1o1	PF3D7_1413500	FeS assembly ATPase SufC (SufC)	Pf4500-4	0.136085
144-V05C	BSPZV1-144	2 wks post final dose	675000	Not Protected	PF3D7_1142200.iso1.exon1.amp1_100	PF3D7_1142200.iso1.exon1.amp1	PF3D7_1142200	conserved Plasmodium protein, unknown function	Pf4000-5	0.365339
144-V05C	BSPZV1-144	2 wks post final dose	675000	Not Protected	PF3D7_1468900.1o1_7355	PF3D7_1468900.1o1	PF3D7_1468900	conserved Plasmodium protein, unknown function	Pf4500-4	-0.0666098
144-V05C	BSPZV1-144	2 wks post final dose	675000	Not Protected	PF3D7_1458600.iso1.exon1.amp2_2215	PF3D7_1458600.iso1.exon1.amp2	PF3D7_1458600	conserved Plasmodium protein, unknown function	Pf4000-5	0.445306
144-V05C	BSPZV1-144	2 wks post final dose	675000	Not Protected	PF3D7_0622000.iso1.exon1.amp1_2087	PF3D7_0622000.iso1.exon1.amp1	PF3D7_0622000	conserved Plasmodium protein, unknown function	Pf4000-5	0.487292
144-V05C	BSPZV1-144	2 wks post final dose	675000	Not Protected	PF3D7_1111500.iso1.exon3.amp1_2095	PF3D7_1111500.iso1.exon3.amp1	PF3D7_1111500	acylphosphatase, putative	Pf4000-5	0.607683
144-V05C	BSPZV1-144	2 wks post final dose	675000	Not Protected	PF3D7_1469600.e1s1_5128	PF3D7_1469600.e1s1	PF3D7_1469600	biotin carboxylase subunit of acetyl CoA carboxylase, putative (ACC1)	Pf4500-4	0.744112
144-V05C	BSPZV1-144	2 wks post final dose	675000	Not Protected	PF3D7_1453700.e2s1_8624	PF3D7_1453700.e2s1	PF3D7_1453700	co-chaperone p23 (P23)	Pf4500-4	0.811504
144-V05C	BSPZV1-144	2 wks post final dose	675000	Not Protected	PF3D7_1423600.iso1.exon2.amp1_3261	PF3D7_1423600.iso1.exon2.amp1	PF3D7_1423600	serine/threonine protein kinase, putative	Pf4000-5	0.115614
144-V05C	BSPZV1-144	2 wks post final dose	675000	Not Protected	PF3D7_1362700.iso1.exon1.amp3_seg1_4602	PF3D7_1362700.iso1.exon1.amp3_seg1	PF3D7_1362700	conserved Plasmodium protein, unknown function	Pf4000-5	-0.455798
144-V05C	BSPZV1-144	2 wks post final dose	675000	Not Protected	PF3D7_0732200.iso1.exon2.amp1_1297	PF3D7_0732200.iso1.exon2.amp1	PF3D7_0732200	rifin	Pf4000-5	0.831893
144-V05C	BSPZV1-144	2 wks post final dose	675000	Not Protected	PF3D7_1460100.1o1_8435	PF3D7_1460100.1o1	PF3D7_1460100	zinc finger protein, putative	Pf4500-4	0.0291696
144-V05C	BSPZV1-144	2 wks post final dose	675000	Not Protected	PF3D7_1237400.e3_7403	PF3D7_1237400.e3	PF3D7_1237400	conserved Plasmodium protein, unknown function	Pf4500-4	0.182983
144-V05C	BSPZV1-144	2 wks post final dose	675000	Not Protected	PF3D7_1241900.1o1_5033	PF3D7_1241900.1o1	PF3D7_1241900	Tetratricopeptide repeat protein, putative	Pf4500-4	0.1642
144-V05C	BSPZV1-144	2 wks post final dose	675000	Not Protected	PF3D7_0632800.iso1.exon1.amp1_4482	PF3D7_0632800.iso1.exon1.amp1	PF3D7_0632800	erythrocyte membrane protein 1, PfEMP1	Pf4000-5	-0.322324
144-V05C	BSPZV1-144	2 wks post final dose	675000	Not Protected	PF3D7_0419400.4o4_8537	PF3D7_0419400.4o4	PF3D7_0419400	conserved Plasmodium protein, unknown function	Pf4500-4	0.0732205
144-V05C	BSPZV1-144	2 wks post final dose	675000	Not Protected	PF3D7_1455700.1o2_4777	PF3D7_1455700.1o2	PF3D7_1455700	conserved Plasmodium protein, unknown function	Pf4500-4	1.20002
144-V05C	BSPZV1-144	2 wks post final dose	675000	Not Protected	PF3D7_0613900.iso1.exon1.amp3_2494	PF3D7_0613900.iso1.exon1.amp3	PF3D7_0613900	myosin E, putative	Pf4000-5	0.0723961
144-V05C	BSPZV1-144	2 wks post final dose	675000	Not Protected	PF3D7_0217200.iso1.exon1.amp1_seg1_563	PF3D7_0217200.iso1.exon1.amp1_seg1	PF3D7_0217200	conserved Plasmodium protein, unknown function	Pf4000-5	0.11671
144-V05C	BSPZV1-144	2 wks post final dose	675000	Not Protected	PF3D7_1220100.1o1_7044	PF3D7_1220100.1o1	PF3D7_1220100	pre-mRNA splicing factor, putative	Pf4500-4	1.6418
144-V05C	BSPZV1-144	2 wks post final dose	675000	Not Protected	PF3D7_1319900.s1_7683	PF3D7_1319900.s1	PF3D7_1319900	conserved Plasmodium protein, unknown function	Pf4500-4	0.0139912
144-V05C	BSPZV1-144	2 wks post final dose	675000	Not Protected	PF3D7_1322200.iso1.exon8.amp1_3835	PF3D7_1322200.iso1.exon8.amp1	PF3D7_1322200	conserved Plasmodium protein, unknown function	Pf4000-5	-0.382993
144-V05C	BSPZV1-144	2 wks post final dose	675000	Not Protected	PF3D7_1455800.e2s2_8656	PF3D7_1455800.e2s2	PF3D7_1455800	LCCL domain-containing protein (CCp2)	Pf4500-4	0.260271
144-V05C	BSPZV1-144	2 wks post final dose	675000	Not Protected	PF3D7_0514100.iso1.exon1.amp1_4290	PF3D7_0514100.iso1.exon1.amp1	PF3D7_0514100	helicase, belonging to UvrD family, putative	Pf4000-5	0.305241
144-V05C	BSPZV1-144	2 wks post final dose	675000	Not Protected	PF3D7_1108500.e2_7986	PF3D7_1108500.e2	PF3D7_1108500	succinyl-CoA synthetase alpha subunit, putative	Pf4500-4	-0.320196
144-V05C	BSPZV1-144	2 wks post final dose	675000	Not Protected	PF3D7_0718300.e5s1_8050	PF3D7_0718300.e5s1	PF3D7_0718300	cysteine repeat modular protein 2 (CRMP2)	Pf4500-4	1.23325
144-V05C	BSPZV1-144	2 wks post final dose	675000	Not Protected	PF3D7_0104600.e2s1_5392	PF3D7_0104600.e2s1	PF3D7_0104600	conserved Plasmodium protein, unknown function	Pf4500-4	-0.058364
144-V05C	BSPZV1-144	2 wks post final dose	675000	Not Protected	PF3D7_1478500.3o3_5520	PF3D7_1478500.3o3	PF3D7_1478500	Plasmodium exported protein (PHISTa), unknown function, pseudogene	Pf4500-4	-0.15906
144-V05C	BSPZV1-144	2 wks post final dose	675000	Not Protected	PF3D7_1007500.1o1_7834	PF3D7_1007500.1o1	PF3D7_1007500	conserved Plasmodium protein, unknown function	Pf4500-4	-0.104828
144-V05C	BSPZV1-144	2 wks post final dose	675000	Not Protected	PF3D7_1116000.iso1.exon2.amp1_3093	PF3D7_1116000.iso1.exon2.amp1	PF3D7_1116000	rhoptry neck protein 4	Pf4000-5	0.671474
144-V05C	BSPZV1-144	2 wks post final dose	675000	Not Protected	PF3D7_1008900.e2s1_7459	PF3D7_1008900.e2s1	PF3D7_1008900	adenylate kinase (AK1)	Pf4500-4	-0.95059
144-V05C	BSPZV1-144	2 wks post final dose	675000	Not Protected	PF3D7_0609600.iso1.exon1.amp2_1952	PF3D7_0609600.iso1.exon1.amp2	PF3D7_0609600	probable protein, unknown function	Pf4000-5	0.296079
144-V05C	BSPZV1-144	2 wks post final dose	675000	Not Protected	PF3D7_1341900.iso1.exon5.amp1_2973	PF3D7_1341900.iso1.exon5.amp1	PF3D7_1341900	vacuolar ATP synthase subunit d, putative	Pf4000-5	0.354386
144-V05C	BSPZV1-144	2 wks post final dose	675000	Not Protected	PF3D7_0409400.iso1.exon1.amp1_148	PF3D7_0409400.iso1.exon1.amp1	PF3D7_0409400	heat shock protein 40	Pf4000-5	-0.357403
144-V05C	BSPZV1-144	2 wks post final dose	675000	Not Protected	PF3D7_1007200.5o5_7627	PF3D7_1007200.5o5	PF3D7_1007200	rhoGAP GTPase, putative	Pf4500-4	-0.0559596
144-V05C	BSPZV1-144	2 wks post final dose	675000	Not Protected	PF3D7_0924700.1o1_8481	PF3D7_0924700.1o1	PF3D7_0924700	splicing factor 3A subunit 3, putative (SF3A3)	Pf4500-4	-0.000192488
144-V05C	BSPZV1-144	2 wks post final dose	675000	Not Protected	PF3D7_0529400.1.e1s1_7954	PF3D7_0529400.1.e1s1	PF3D7_0529400.1	conserved Plasmodium protein, unknown function	Pf4500-4	-0.0969791
144-V05C	BSPZV1-144	2 wks post final dose	675000	Not Protected	PF3D7_0910200.iso1.exon1.amp2_seg1_4314	PF3D7_0910200.iso1.exon1.amp2_seg1	PF3D7_0910200	conserved Plasmodium protein, unknown function	Pf4000-5	0.0538244
144-V05C	BSPZV1-144	2 wks post final dose	675000	Not Protected	PF3D7_1448200.13o14_6493	PF3D7_1448200.13o14	PF3D7_1448200	conserved Plasmodium protein, unknown function	Pf4500-4	-0.107938
144-V05C	BSPZV1-144	2 wks post final dose	675000	Not Protected	PF3D7_1242100.iso1.exon1.amp1_2375	PF3D7_1242100.iso1.exon1.amp1	PF3D7_1242100	conserved Plasmodium protein, unknown function	Pf4000-5	0.415928
144-V05C	BSPZV1-144	2 wks post final dose	675000	Not Protected	PF3D7_1231000.iso1.exon8.amp1_3907	PF3D7_1231000.iso1.exon8.amp1	PF3D7_1231000	conserved Plasmodium protein, unknown function	Pf4000-5	0.0292018
144-V05C	BSPZV1-144	2 wks post final dose	675000	Not Protected	PF3D7_0704500.iso1.exon1.amp1_seg2_2040	PF3D7_0704500.iso1.exon1.amp1_seg2	PF3D7_0704500	serine/threonine protein kinase, putative	Pf4000-5	-0.19766
144-V05C	BSPZV1-144	2 wks post final dose	675000	Not Protected	PF3D7_0317900.iso1.exon2.amp1_1888	PF3D7_0317900.iso1.exon2.amp1	PF3D7_0317900	conserved Plasmodium protein, unknown function	Pf4000-5	0.253699
144-V05C	BSPZV1-144	2 wks post final dose	675000	Not Protected	PF3D7_0823800.1o1_7922	PF3D7_0823800.1o1	PF3D7_0823800	DnaJ protein, putative	Pf4500-4	0.136786
144-V05C	BSPZV1-144	2 wks post final dose	675000	Not Protected	PF3D7_0610600.1o2_8768	PF3D7_0610600.1o2	PF3D7_0610600	calcium-dependent protein kinase (CDPK2)	Pf4500-4	-0.201172
144-V05C	BSPZV1-144	2 wks post final dose	675000	Not Protected	PF3D7_1332300.1o1_5823	PF3D7_1332300.1o1	PF3D7_1332300	sedlin, putative	Pf4500-4	0.0777897
144-V05C	BSPZV1-144	2 wks post final dose	675000	Not Protected	PF3D7_0210400.iso1.exon1.amp1_28	PF3D7_0210400.iso1.exon1.amp1	PF3D7_0210400	50S ribosomal protein L33, putative	Pf4000-5	0.0096687
144-V05C	BSPZV1-144	2 wks post final dose	675000	Not Protected	PF3D7_0712800.iso1.exon2.amp2_1944	PF3D7_0712800.iso1.exon2.amp2	PF3D7_0712800	erythrocyte membrane protein 1, PfEMP1	Pf4000-5	1.36134
144-V05C	BSPZV1-144	2 wks post final dose	675000	Not Protected	PF3D7_0722900.iso1.exon8.amp1_2926	PF3D7_0722900.iso1.exon8.amp1	PF3D7_0722900	conserved Plasmodium protein, unknown function	Pf4000-5	0.169947
144-V05C	BSPZV1-144	2 wks post final dose	675000	Not Protected	PF3D7_1006100.iso1.exon2.amp1_1489	PF3D7_1006100.iso1.exon2.amp1	PF3D7_1006100	CCR4-NOT transcription complex subunit 5, putative	Pf4000-5	-1.15603
144-V05C	BSPZV1-144	2 wks post final dose	675000	Not Protected	PF3D7_1316800.iso1.exon1.amp1_603	PF3D7_1316800.iso1.exon1.amp1	PF3D7_1316800	sec20 homolog, putative	Pf4000-5	0.91509
144-V05C	BSPZV1-144	2 wks post final dose	675000	Not Protected	PF3D7_0928900_4817	PF3D7_0928900	PF3D7_0928900	guanylate kinase (GK)	Pf4500-4	0.473353
144-V05C	BSPZV1-144	2 wks post final dose	675000	Not Protected	PF3D7_0100300.iso1.exon1.amp1_1010	PF3D7_0100300.iso1.exon1.amp1	PF3D7_0100300	var-like erythrocyte membrane protein 1	Pf4000-5	0.53494
144-V05C	BSPZV1-144	2 wks post final dose	675000	Not Protected	PF3D7_1345700.e1s1_8337	PF3D7_1345700.e1s1	PF3D7_1345700	isocitrate dehydrogenase (NADP), mitochondrial precursor (IDH)	Pf4500-4	0.363576
144-V05C	BSPZV1-144	2 wks post final dose	675000	Not Protected	PF3D7_0910400.iso1.exon1.amp2_seg1_2878	PF3D7_0910400.iso1.exon1.amp2_seg1	PF3D7_0910400	selenide water dikinase, putative	Pf4000-5	0.320224
144-V05C	BSPZV1-144	2 wks post final dose	675000	Not Protected	PF3D7_1417200.e1s4_7723	PF3D7_1417200.e1s4	PF3D7_1417200	NOT family protein, putative	Pf4500-4	1.61683
144-V05C	BSPZV1-144	2 wks post final dose	675000	Not Protected	PF3D7_0930900.iso1.exon2.amp1_675	PF3D7_0930900.iso1.exon2.amp1	PF3D7_0930900	NifU-like protein, putative	Pf4000-5	-0.524478
144-V05C	BSPZV1-144	2 wks post final dose	675000	Not Protected	PF3D7_1208200.e3s1_8864	PF3D7_1208200.e3s1	PF3D7_1208200	cysteine repeat modular protein 3 (CRMP3)	Pf4500-4	-0.131162
144-V05C	BSPZV1-144	2 wks post final dose	675000	Not Protected	PF3D7_1023100.e1s1_4785	PF3D7_1023100.e1s1	PF3D7_1023100	dynein heavy chain, putative	Pf4500-4	0.254148
144-V05C	BSPZV1-144	2 wks post final dose	675000	Not Protected	PF3D7_1406100.iso1.exon1.amp1_244	PF3D7_1406100.iso1.exon1.amp1	PF3D7_1406100	conserved Plasmodium protein, unknown function	Pf4000-5	0.400112
144-V05C	BSPZV1-144	2 wks post final dose	675000	Not Protected	PF3D7_1312100.iso1.exon2.amp1_3843	PF3D7_1312100.iso1.exon2.amp1	PF3D7_1312100	conserved Plasmodium protein, unknown function	Pf4000-5	0.0909176
144-V05C	BSPZV1-144	2 wks post final dose	675000	Not Protected	PF3D7_1027000.iso1.exon1.amp2_seg1_3452	PF3D7_1027000.iso1.exon1.amp2_seg1	PF3D7_1027000	conserved Plasmodium protein, unknown function	Pf4000-5	0.518448
144-V05C	BSPZV1-144	2 wks post final dose	675000	Not Protected	PF3D7_1210700.1o3_7619	PF3D7_1210700.1o3	PF3D7_1210700	conserved Plasmodium protein, unknown function	Pf4500-4	-0.070447
144-V05C	BSPZV1-144	2 wks post final dose	675000	Not Protected	PF3D7_1001100.1.1o1_5536	PF3D7_1001100.1.1o1	PF3D7_1001100.1	acyl-CoA binding protein, isoform 1, ACBP1 (ACBP1)	Pf4500-4	0.316719
144-V05C	BSPZV1-144	2 wks post final dose	675000	Not Protected	PF3D7_0301700.e1s1_8026	PF3D7_0301700.e1s1	PF3D7_0301700	Plasmodium exported protein, unknown function	Pf4500-4	0.127648
144-V05C	BSPZV1-144	2 wks post final dose	675000	Not Protected	PF3D7_1133600.iso1.exon1.amp1_1305	PF3D7_1133600.iso1.exon1.amp1	PF3D7_1133600	conserved Plasmodium protein, unknown function	Pf4000-5	-0.0758043
144-V05C	BSPZV1-144	2 wks post final dose	675000	Not Protected	PF3D7_0106700.s1_8840	PF3D7_0106700.s1	PF3D7_0106700	small ribosomal subunit assembling AARP2 protein (AARP2)	Pf4500-4	-0.16877
144-V05C	BSPZV1-144	2 wks post final dose	675000	Not Protected	PF3D7_0526900.iso1.exon3.amp1_1800	PF3D7_0526900.iso1.exon3.amp1	PF3D7_0526900	conserved Plasmodium protein, unknown function	Pf4000-5	0.761815
144-V05C	BSPZV1-144	2 wks post final dose	675000	Not Protected	PF3D7_1442500.iso1.exon8.amp1_946	PF3D7_1442500.iso1.exon8.amp1	PF3D7_1442500	protein prenyltransferase alpha subunit, putative	Pf4000-5	0.384424
144-V05C	BSPZV1-144	2 wks post final dose	675000	Not Protected	PF3D7_1346800.e1s1_8920	PF3D7_1346800.e1s1	PF3D7_1346800	6-cysteine protein (P47)	Pf4500-4	-0.192342
144-V05C	BSPZV1-144	2 wks post final dose	675000	Not Protected	PF3D7_0522400.e4s3_7140	PF3D7_0522400.e4s3	PF3D7_0522400	conserved Plasmodium protein, unknown function	Pf4500-4	0.180436
144-V05C	BSPZV1-144	2 wks post final dose	675000	Not Protected	PF3D7_1126100.iso1.exon2.amp2_220	PF3D7_1126100.iso1.exon2.amp2	PF3D7_1126100	autophagy-related protein 7, putative	Pf4000-5	1.09185
144-V05C	BSPZV1-144	2 wks post final dose	675000	Not Protected	PF3D7_0627300.1o1_8170	PF3D7_0627300.1o1	PF3D7_0627300	c3h4-type ring finger protein, putative	Pf4500-4	0.415038
144-V05C	BSPZV1-144	2 wks post final dose	675000	Not Protected	PF3D7_0721400.iso1.exon6.amp1_3788	PF3D7_0721400.iso1.exon6.amp1	PF3D7_0721400	conserved Plasmodium protein, unknown function	Pf4000-5	0.0173181
144-V05C	BSPZV1-144	2 wks post final dose	675000	Not Protected	PF3D7_1411000.iso1.exon2.amp1_seg2_3460	PF3D7_1411000.iso1.exon2.amp1_seg2	PF3D7_1411000	conserved Plasmodium protein, unknown function	Pf4000-5	0.123451
144-V05C	BSPZV1-144	2 wks post final dose	675000	Not Protected	PF3D7_0207200_6262	PF3D7_0207200	PF3D7_0207200	iron-sulfur assembly protein, putative	Pf4500-4	-0.123589
144-V05C	BSPZV1-144	2 wks post final dose	675000	Not Protected	PF3D7_1429800.2o3_6517	PF3D7_1429800.2o3	PF3D7_1429800	coatamer beta subunit, putative	Pf4500-4	-0.0700426
144-V05C	BSPZV1-144	2 wks post final dose	675000	Not Protected	PF3D7_0615800.3o3_5943	PF3D7_0615800.3o3	PF3D7_0615800	conserved Plasmodium protein, unknown function	Pf4500-4	0.0896025
144-V05C	BSPZV1-144	2 wks post final dose	675000	Not Protected	PF3D7_0937300.iso1.exon2.amp1_3309	PF3D7_0937300.iso1.exon2.amp1	PF3D7_0937300	rifin	Pf4000-5	0.354695
144-V05C	BSPZV1-144	2 wks post final dose	675000	Not Protected	PF3D7_0412900.iso1.exon1.amp1_435	PF3D7_0412900.iso1.exon1.amp1	PF3D7_0412900	erythrocyte membrane protein 1, PfEMP1	Pf4000-5	0.843966
144-V05C	BSPZV1-144	2 wks post final dose	675000	Not Protected	PF3D7_0501100.1.e4s1_6302	PF3D7_0501100.1.e4s1	PF3D7_0501100.1	heat shock protein 40, type II (HSP40)	Pf4500-4	1.04344
144-V05C	BSPZV1-144	2 wks post final dose	675000	Not Protected	PF3D7_1031200.iso1.exon1.amp1_3883	PF3D7_1031200.iso1.exon1.amp1	PF3D7_1031200	MORN repeat-containing protein 1	Pf4000-5	0.412957
144-V05C	BSPZV1-144	2 wks post final dose	675000	Not Protected	PF3D7_0718900.1o2_8409	PF3D7_0718900.1o2	PF3D7_0718900	conserved Plasmodium protein, unknown function	Pf4500-4	-0.392678
144-V05C	BSPZV1-144	2 wks post final dose	675000	Not Protected	PF3D7_0720200.iso1.exon1.amp1_2383	PF3D7_0720200.iso1.exon1.amp1	PF3D7_0720200	conserved Plasmodium protein, unknown function	Pf4000-5	-1.09894
144-V05C	BSPZV1-144	2 wks post final dose	675000	Not Protected	PF3D7_0411200.iso1.exon1.amp1_4003	PF3D7_0411200.iso1.exon1.amp1	PF3D7_0411200	conserved Plasmodium protein, unknown function	Pf4000-5	0.0733372
144-V05C	BSPZV1-144	2 wks post final dose	675000	Not Protected	PF3D7_1029500.1o1_4650	PF3D7_1029500.1o1	PF3D7_1029500	conserved Plasmodium protein, unknown function	Pf4500-4	0.281976
144-V05C	BSPZV1-144	2 wks post final dose	675000	Not Protected	PF3D7_0220100.e1s1_8896	PF3D7_0220100.e1s1	PF3D7_0220100	DnaJ protein, putative	Pf4500-4	0.029547
144-V05C	BSPZV1-144	2 wks post final dose	675000	Not Protected	PF3D7_1401300.2o2_5296	PF3D7_1401300.2o2	PF3D7_1401300	aminopeptidase, putative	Pf4500-4	0.0941203
144-V05C	BSPZV1-144	2 wks post final dose	675000	Not Protected	PF3D7_0408000.iso1.exon1.amp1_683	PF3D7_0408000.iso1.exon1.amp1	PF3D7_0408000	conserved Plasmodium protein, unknown function	Pf4000-5	0.300748
144-V05C	BSPZV1-144	2 wks post final dose	675000	Not Protected	PF3D7_0808100.iso1.exon3.amp1_3963	PF3D7_0808100.iso1.exon3.amp1	PF3D7_0808100	conserved Plasmodium protein, unknown function	Pf4000-5	0.339129
144-V05C	BSPZV1-144	2 wks post final dose	675000	Not Protected	PF3D7_1305000.iso1.exon1.amp1_1417	PF3D7_1305000.iso1.exon1.amp1	PF3D7_1305000	conserved Plasmodium protein, unknown function	Pf4000-5	0.406101
144-V05C	BSPZV1-144	2 wks post final dose	675000	Not Protected	PF3D7_1230000.iso1.exon8.amp1_3524	PF3D7_1230000.iso1.exon8.amp1	PF3D7_1230000	conserved Plasmodium protein, unknown function	Pf4000-5	-0.354363
144-V05C	BSPZV1-144	2 wks post final dose	675000	Not Protected	PF3D7_0516100.e2s1_8313	PF3D7_0516100.e2s1	PF3D7_0516100	cation-transporting ATPase 1 (ATPase1)	Pf4500-4	0.0642226
144-V05C	BSPZV1-144	2 wks post final dose	675000	Not Protected	PF3D7_1139500.1.e1s1_5751	PF3D7_1139500.1.e1s1	PF3D7_1139500.1	AAA family ATPase, putative	Pf4500-4	1.54665
144-V05C	BSPZV1-144	2 wks post final dose	675000	Not Protected	PF3D7_0107700.1o1_5280	PF3D7_0107700.1o1	PF3D7_0107700	conserved Plasmodium membrane protein, unknown function	Pf4500-4	-0.102965
144-V05C	BSPZV1-144	2 wks post final dose	675000	Not Protected	PF3D7_1316500.1o1_6206	PF3D7_1316500.1o1	PF3D7_1316500	conserved Plasmodium protein, unknown function	Pf4500-4	0.0693711
144-V05C	BSPZV1-144	2 wks post final dose	675000	Not Protected	PF3D7_1419300.e2s1_9199	PF3D7_1419300.e2s1	PF3D7_1419300	glutathione S-transferase (GST)	Pf4500-4	0.0494104
144-V05C	BSPZV1-144	2 wks post final dose	675000	Not Protected	PF3D7_1451400.iso1.exon1.amp1_seg1_3165	PF3D7_1451400.iso1.exon1.amp1_seg1	PF3D7_1451400	transcriptional regulatory protein sir2b	Pf4000-5	0.705988
144-V05C	BSPZV1-144	2 wks post final dose	675000	Not Protected	PF3D7_0214800.iso1.exon2.amp1_795	PF3D7_0214800.iso1.exon2.amp1	PF3D7_0214800	conserved Plasmodium membrane protein, unknown function	Pf4000-5	0.496443
144-V05C	BSPZV1-144	2 wks post final dose	675000	Not Protected	PF3D7_0703800.iso1.exon1.amp2_3373	PF3D7_0703800.iso1.exon1.amp2	PF3D7_0703800	conserved Plasmodium protein, unknown function	Pf4000-5	0.0334639
144-V05C	BSPZV1-144	2 wks post final dose	675000	Not Protected	PF3D7_0324100.2o2_5248	PF3D7_0324100.2o2	PF3D7_0324100	Pfmc-2TM Maurer's cleft two transmembrane protein (MC-2TM)	Pf4500-4	0.350947
144-V05C	BSPZV1-144	2 wks post final dose	675000	Not Protected	PF3D7_1460900.iso1.exon3.amp1_340	PF3D7_1460900.iso1.exon3.amp1	PF3D7_1460900	apicoplast ribosomal protein S10 precursor, putative	Pf4000-5	0.182213
144-V05C	BSPZV1-144	2 wks post final dose	675000	Not Protected	PF3D7_1415000.iso1.exon1.amp1_2734	PF3D7_1415000.iso1.exon1.amp1	PF3D7_1415000	uracil-DNA glycosylase, putative	Pf4000-5	0.394098
144-V05C	BSPZV1-144	2 wks post final dose	675000	Not Protected	PF3D7_1435200.iso1.exon3.amp1_619	PF3D7_1435200.iso1.exon3.amp1	PF3D7_1435200	conserved Plasmodium protein, unknown function	Pf4000-5	0.140434
144-V05C	BSPZV1-144	2 wks post final dose	675000	Not Protected	PF3D7_1326800.1o1_7308	PF3D7_1326800.1o1	PF3D7_1326800	syntaxin, Qa-SNARE family (SYN18)	Pf4500-4	0.350343
144-V05C	BSPZV1-144	2 wks post final dose	675000	Not Protected	PF3D7_1216700.iso1.exon1.amp2_3668	PF3D7_1216700.iso1.exon1.amp2	PF3D7_1216700	perforin like protein 2	Pf4000-5	0.393043
144-V05C	BSPZV1-144	2 wks post final dose	675000	Not Protected	PF3D7_1354300.iso1.exon2.amp1_1034	PF3D7_1354300.iso1.exon2.amp1	PF3D7_1354300	large subunit rRNA methyltransferase, putative	Pf4000-5	0.35144
144-V05C	BSPZV1-144	2 wks post final dose	675000	Not Protected	PF3D7_1138200.2o2_7842	PF3D7_1138200.2o2	PF3D7_1138200	conserved Plasmodium membrane protein, unknown function	Pf4500-4	-0.0392394
144-V05C	BSPZV1-144	2 wks post final dose	675000	Not Protected	PF3D7_0417400.iso1.exon1.amp5_seg1_1441	PF3D7_0417400.iso1.exon1.amp5_seg1	PF3D7_0417400	conserved Plasmodium protein, unknown function	Pf4000-5	0.209181
144-V05C	BSPZV1-144	2 wks post final dose	675000	Not Protected	PF3D7_0505100.iso1.exon2.amp1_507	PF3D7_0505100.iso1.exon2.amp1	PF3D7_0505100	conserved Plasmodium protein, unknown function	Pf4000-5	0.229756
144-V05C	BSPZV1-144	2 wks post final dose	675000	Not Protected	PF3D7_0724700.e2s3_5778	PF3D7_0724700.e2s3	PF3D7_0724700	conserved Plasmodium protein, unknown function	Pf4500-4	0.0671668
144-V05C	BSPZV1-144	2 wks post final dose	675000	Not Protected	PF3D7_1207200.iso1.exon1.amp3_2782	PF3D7_1207200.iso1.exon1.amp3	PF3D7_1207200	conserved Plasmodium protein, unknown function	Pf4000-5	0.848151
144-V05C	BSPZV1-144	2 wks post final dose	675000	Not Protected	PF3D7_1405200.iso1.exon1.amp1_3269	PF3D7_1405200.iso1.exon1.amp1	PF3D7_1405200	sybindin-like protein, putative	Pf4000-5	-0.0766392
144-V05C	BSPZV1-144	2 wks post final dose	675000	Not Protected	PF3D7_1373500.iso1.exon2.amp1_1082	PF3D7_1373500.iso1.exon2.amp1	PF3D7_1373500	erythrocyte membrane protein 1, PfEMP1	Pf4000-5	0.448066
144-V05C	BSPZV1-144	2 wks post final dose	675000	Not Protected	PF3D7_0202400.e1s2_4889	PF3D7_0202400.e1s2	PF3D7_0202400	conserved Plasmodium protein, unknown function	Pf4500-4	1.84556
144-V05C	BSPZV1-144	2 wks post final dose	675000	Not Protected	PF3D7_1207500.e2s1_8601	PF3D7_1207500.e2s1	PF3D7_1207500	conserved Plasmodium protein, unknown function	Pf4500-4	-0.192783
144-V05C	BSPZV1-144	2 wks post final dose	675000	Not Protected	PF3D7_1108000.1o1_6757	PF3D7_1108000.1o1	PF3D7_1108000	IWS1-like protein, putative	Pf4500-4	-0.0430044
144-V05C	BSPZV1-144	2 wks post final dose	675000	Not Protected	PF3D7_0621700.iso1.exon1.amp1_1369	PF3D7_0621700.iso1.exon1.amp1	PF3D7_0621700	conserved Plasmodium protein, unknown function	Pf4000-5	0.271359
144-V05C	BSPZV1-144	2 wks post final dose	675000	Not Protected	PF3D7_1021900.e1s2_5472	PF3D7_1021900.e1s2	PF3D7_1021900	conserved Plasmodium protein (10b antigen), unknown function	Pf4500-4	0.808867
144-V05C	BSPZV1-144	2 wks post final dose	675000	Not Protected	PF3D7_0516100.e1s3_6917	PF3D7_0516100.e1s3	PF3D7_0516100	cation-transporting ATPase 1 (ATPase1)	Pf4500-4	-0.448878
144-V05C	BSPZV1-144	2 wks post final dose	675000	Not Protected	PF3D7_0306600.iso1.exon1.amp1_4410	PF3D7_0306600.iso1.exon1.amp1	PF3D7_0306600	conserved Plasmodium protein, unknown function	Pf4000-5	-1.67061
144-V05C	BSPZV1-144	2 wks post final dose	675000	Not Protected	PF3D7_1119600.iso1.exon1.amp1_3437	PF3D7_1119600.iso1.exon1.amp1	PF3D7_1119600	peptidase, putative	Pf4000-5	0.0225902
144-V05C	BSPZV1-144	2 wks post final dose	675000	Not Protected	PF3D7_0708400.e1_5679	PF3D7_0708400.e1	PF3D7_0708400	heat shock protein 90 (HSP90)	Pf4500-4	0.366716
144-V05C	BSPZV1-144	2 wks post final dose	675000	Not Protected	PF3D7_1204100.iso1.exon1.amp2_771	PF3D7_1204100.iso1.exon1.amp2	PF3D7_1204100	conserved Plasmodium protein, unknown function	Pf4000-5	0.179069
144-V05C	BSPZV1-144	2 wks post final dose	675000	Not Protected	PF3D7_1002300.1o1_5584	PF3D7_1002300.1o1	PF3D7_1002300	conserved Plasmodium protein, unknown function	Pf4500-4	0.729667
144-V05C	BSPZV1-144	2 wks post final dose	675000	Not Protected	PF3D7_1326400.1o10_6158	PF3D7_1326400.1o10	PF3D7_1326400	translation initiation factor EIF-2B gamma subunit, putative	Pf4500-4	-0.077136
144-V05C	BSPZV1-144	2 wks post final dose	675000	Not Protected	PF3D7_0108400.iso1.exon8.amp1_651	PF3D7_0108400.iso1.exon8.amp1	PF3D7_0108400	mitochondrial carrier protein, putative	Pf4000-5	0.530972
144-V05C	BSPZV1-144	2 wks post final dose	675000	Not Protected	PF3D7_1432900.e1s1_8912	PF3D7_1432900.e1s1	PF3D7_1432900	SF-assemblin, putative	Pf4500-4	-0.11689
144-V05C	BSPZV1-144	2 wks post final dose	675000	Not Protected	PF3D7_1455600.iso1.exon1.amp2_seg2_3748	PF3D7_1455600.iso1.exon1.amp2_seg2	PF3D7_1455600	ferlin, putative	Pf4000-5	0.684098
144-V05C	BSPZV1-144	2 wks post final dose	675000	Not Protected	PF3D7_0501100.iso2.exon3.amp1_2407	PF3D7_0501100.iso2.exon3.amp1	PF3D7_0501100	heat shock protein 40, type II	Pf4000-5	-0.0251639
144-V05C	BSPZV1-144	2 wks post final dose	675000	Not Protected	PF3D7_1422600.1o1_5320	PF3D7_1422600.1o1	PF3D7_1422600	conserved Plasmodium protein, unknown function	Pf4500-4	0.158862
144-V05C	BSPZV1-144	2 wks post final dose	675000	Not Protected	PF3D7_0930500.iso1.exon2.amp1_3405	PF3D7_0930500.iso1.exon2.amp1	PF3D7_0930500	diacylglycerol kinase, putative	Pf4000-5	-0.0326374
144-V05C	BSPZV1-144	2 wks post final dose	675000	Not Protected	PF3D7_0932400.iso1.exon2.amp1_1824	PF3D7_0932400.iso1.exon2.amp1	PF3D7_0932400	peptide release factor, putative	Pf4000-5	0.115249
144-V05C	BSPZV1-144	2 wks post final dose	675000	Not Protected	PF3D7_0605000.iso1.exon1.amp1_1561	PF3D7_0605000.iso1.exon1.amp1	PF3D7_0605000	mitochondrial ribosomal protein L24 precursor, putative	Pf4000-5	-0.219162
144-V05C	BSPZV1-144	2 wks post final dose	675000	Not Protected	PF3D7_0513600.e1s1_7667	PF3D7_0513600.e1s1	PF3D7_0513600	deoxyribodipyrimidine photolyase (photoreactivating enzyme, DNA photolyase), putative	Pf4500-4	0.185357
144-V05C	BSPZV1-144	2 wks post final dose	675000	Not Protected	PF3D7_1125100_4825	PF3D7_1125100	PF3D7_1125100	vacuolar membrane protein-related, putative	Pf4500-4	0.557156
144-V05C	BSPZV1-144	2 wks post final dose	675000	Not Protected	PF3D7_1135800.iso1.exon1.amp1_4434	PF3D7_1135800.iso1.exon1.amp1	PF3D7_1135800	conserved Plasmodium protein, unknown function	Pf4000-5	-0.197887
144-V05C	BSPZV1-144	2 wks post final dose	675000	Not Protected	PF3D7_0913500.3o3_7012	PF3D7_0913500.3o3	PF3D7_0913500	protease, putative	Pf4500-4	0.3195
144-V05C	BSPZV1-144	2 wks post final dose	675000	Not Protected	PF3D7_0813000.e1s1_8074	PF3D7_0813000.e1s1	PF3D7_0813000	conserved Plasmodium protein, unknown function	Pf4500-4	-0.0513621
144-V05C	BSPZV1-144	2 wks post final dose	675000	Not Protected	PF3D7_0608400.iso1.exon2.amp1_1521	PF3D7_0608400.iso1.exon2.amp1	PF3D7_0608400	conserved Plasmodium protein, unknown function	Pf4000-5	0.936661
144-V05C	BSPZV1-144	2 wks post final dose	675000	Not Protected	PF3D7_1230400.5o5_7268	PF3D7_1230400.5o5	PF3D7_1230400	ATP-dependent protease subunit ClpQ (ClpQ)	Pf4500-4	0.217183
144-V05C	BSPZV1-144	2 wks post final dose	675000	Not Protected	PF3D7_0106400.iso1.exon4.amp1_3532	PF3D7_0106400.iso1.exon4.amp1	PF3D7_0106400	pre-rRNA-processing protein TSR2, putative	Pf4000-5	0.272834
144-V05C	BSPZV1-144	2 wks post final dose	675000	Not Protected	PF3D7_0623100.iso1.exon1.amp1_4155	PF3D7_0623100.iso1.exon1.amp1	PF3D7_0623100	coronin binding protein, putative	Pf4000-5	0.416818
144-V05C	BSPZV1-144	2 wks post final dose	675000	Not Protected	PF3D7_0819800.e15s1_7196	PF3D7_0819800.e15s1	PF3D7_0819800	conserved Plasmodium protein, unknown function	Pf4500-4	0.191272
144-V05C	BSPZV1-144	2 wks post final dose	675000	Not Protected	PF3D7_1474200.iso1.exon1.amp5_1896	PF3D7_1474200.iso1.exon1.amp5	PF3D7_1474200	conserved Plasmodium membrane protein, unknown function	Pf4000-5	0.327816
144-V05C	BSPZV1-144	2 wks post final dose	675000	Not Protected	PF3D7_0622100.iso1.exon1.amp1_seg2_890	PF3D7_0622100.iso1.exon1.amp1_seg2	PF3D7_0622100	conserved Plasmodium protein, unknown function	Pf4000-5	0.04675
144-V05C	BSPZV1-144	2 wks post final dose	675000	Not Protected	PF3D7_1010900.iso1.exon2.amp1_108	PF3D7_1010900.iso1.exon2.amp1	PF3D7_1010900	conserved Plasmodium protein, unknown function	Pf4000-5	0.238844
144-V05C	BSPZV1-144	2 wks post final dose	675000	Not Protected	PF3D7_0530200.1o1_9064	PF3D7_0530200.1o1	PF3D7_0530200	triose phosphate transporter (iTPT)	Pf4500-4	-0.194545
144-V05C	BSPZV1-144	2 wks post final dose	675000	Not Protected	PF3D7_1461600.e3s1_5467	PF3D7_1461600.e3s1	PF3D7_1461600	splicing factor 3B subunit 2, putative (SF3B2)	Pf4500-4	0.00825783
144-V05C	BSPZV1-144	2 wks post final dose	675000	Not Protected	PF3D7_1230500.1o1_7906	PF3D7_1230500.1o1	PF3D7_1230500	WD-repeat protein, putative	Pf4500-4	-0.051961
144-V05C	BSPZV1-144	2 wks post final dose	675000	Not Protected	PF3D7_0102700.2o2_7571	PF3D7_0102700.2o2	PF3D7_0102700	merozoite-associated tryptophan-rich antigen, putative	Pf4500-4	0.172427
144-V05C	BSPZV1-144	2 wks post final dose	675000	Not Protected	PF3D7_1244200.1o1_5057	PF3D7_1244200.1o1	PF3D7_1244200	transcription factor Tfb2, putative	Pf4500-4	0.0306787
144-V05C	BSPZV1-144	2 wks post final dose	675000	Not Protected	PF3D7_1019000.e1s2_6350	PF3D7_1019000.e1s2	PF3D7_1019000	eukaryotic translation initiation factor subunit eIF2A, putative	Pf4500-4	0.480273
144-V05C	BSPZV1-144	2 wks post final dose	675000	Not Protected	PF3D7_1426200.1o1_5871	PF3D7_1426200.1o1	PF3D7_1426200	arginine methyltransferase 1 (PRMT1)	Pf4500-4	2.34724
144-V05C	BSPZV1-144	2 wks post final dose	675000	Not Protected	PF3D7_0816800.iso1.exon3.amp1_4091	PF3D7_0816800.iso1.exon3.amp1	PF3D7_0816800	meiotic recombination protein dmc1-like protein	Pf4000-5	0.134675
144-V05C	BSPZV1-144	2 wks post final dose	675000	Not Protected	PF3D7_1024800.e2s1_9239	PF3D7_1024800.e2s1	PF3D7_1024800	conserved Plasmodium protein, unknown function	Pf4500-4	-0.467398
144-V05C	BSPZV1-144	2 wks post final dose	675000	Not Protected	PF3D7_1211600.iso1.exon1.amp1_2543	PF3D7_1211600.iso1.exon1.amp1	PF3D7_1211600	lysine-specific histone demethylase 1, putative	Pf4000-5	0.235316
144-V05C	BSPZV1-144	2 wks post final dose	675000	Not Protected	PF3D7_0525200.iso1.exon1.amp2_3987	PF3D7_0525200.iso1.exon1.amp2	PF3D7_0525200	conserved Plasmodium protein, unknown function	Pf4000-5	0.407893
144-V05C	BSPZV1-144	2 wks post final dose	675000	Not Protected	PF3D7_1403000.iso1.exon7.amp1_2639	PF3D7_1403000.iso1.exon7.amp1	PF3D7_1403000	conserved Plasmodium protein, unknown function	Pf4000-5	0.0440642
144-V05C	BSPZV1-144	2 wks post final dose	675000	Not Protected	PF3D7_0808900.iso1.exon1.amp1_4458	PF3D7_0808900.iso1.exon1.amp1	PF3D7_0808900	rifin	Pf4000-5	2.45884
144-V05C	BSPZV1-144	2 wks post final dose	675000	Not Protected	PF3D7_1140700.e1s2_7212	PF3D7_1140700.e1s2	PF3D7_1140700	conserved Plasmodium protein, unknown function	Pf4500-4	0.465285
144-V05C	BSPZV1-144	2 wks post final dose	675000	Not Protected	PF3D7_1102600.2o2_7859	PF3D7_1102600.2o2	PF3D7_1102600	Plasmodium exported protein, unknown function (GEXP14)	Pf4500-4	-0.205607
144-V05C	BSPZV1-144	2 wks post final dose	675000	Not Protected	PF3D7_0522800.e2s1_5105	PF3D7_0522800.e2s1	PF3D7_0522800	G10 protein, putative	Pf4500-4	0.259467
144-V05C	BSPZV1-144	2 wks post final dose	675000	Not Protected	PF3D7_0102200.e2s2_7188	PF3D7_0102200.e2s2	PF3D7_0102200	ring-infected erythrocyte surface antigen (RESA)	Pf4500-4	1.31401
144-V05C	BSPZV1-144	2 wks post final dose	675000	Not Protected	PF3D7_0622100.iso1.exon1.amp2_seg2_2303	PF3D7_0622100.iso1.exon1.amp2_seg2	PF3D7_0622100	conserved Plasmodium protein, unknown function	Pf4000-5	0.663246
144-V05C	BSPZV1-144	2 wks post final dose	675000	Not Protected	PF3D7_1122200.iso1.exon5.amp1_1226	PF3D7_1122200.iso1.exon5.amp1	PF3D7_1122200	conserved Plasmodium protein, unknown function	Pf4000-5	0.253367
144-V05C	BSPZV1-144	2 wks post final dose	675000	Not Protected	PF3D7_0919400.e2s1_5440	PF3D7_0919400.e2s1	PF3D7_0919400	protein disulfide isomerase (PDI9)	Pf4500-4	-0.454145
144-V05C	BSPZV1-144	2 wks post final dose	675000	Not Protected	PF3D7_0519500.e1s1_7499	PF3D7_0519500.e1s1	PF3D7_0519500	carbon catabolite repressor protein 4, putative (CCR4)	Pf4500-4	-0.52998
144-V05C	BSPZV1-144	2 wks post final dose	675000	Not Protected	PF3D7_1306300.iso1.exon3.amp1_52	PF3D7_1306300.iso1.exon3.amp1	PF3D7_1306300	SAM dependent methyltransferase, putative	Pf4000-5	2.10764
144-V05C	BSPZV1-144	2 wks post final dose	675000	Not Protected	PF3D7_0919400.e1s1_4873	PF3D7_0919400.e1s1	PF3D7_0919400	protein disulfide isomerase (PDI9)	Pf4500-4	0.371487
144-V05C	BSPZV1-144	2 wks post final dose	675000	Not Protected	PF3D7_0619300.iso1.exon3.amp2_3381	PF3D7_0619300.iso1.exon3.amp2	PF3D7_0619300	conserved Plasmodium protein, unknown function	Pf4000-5	0.447631
144-V05C	BSPZV1-144	2 wks post final dose	675000	Not Protected	PF3D7_1408300.iso1.exon1.amp1_2678	PF3D7_1408300.iso1.exon1.amp1	PF3D7_1408300	conserved Plasmodium protein, unknown function	Pf4000-5	0.32955
144-V05C	BSPZV1-144	2 wks post final dose	675000	Not Protected	PF3D7_0822800.1o1_8441	PF3D7_0822800.1o1	PF3D7_0822800	U5 snrnp-specific protein, putative	Pf4500-4	-1.86813
144-V05C	BSPZV1-144	2 wks post final dose	675000	Not Protected	PF3D7_1018100.1o1_6997	PF3D7_1018100.1o1	PF3D7_1018100	conserved Plasmodium protein, unknown function	Pf4500-4	0.572908
144-V05C	BSPZV1-144	2 wks post final dose	675000	Not Protected	PF3D7_1359500.1o1_6701	PF3D7_1359500.1o1	PF3D7_1359500	conserved Plasmodium protein, unknown function	Pf4500-4	-0.0945095
144-V05C	BSPZV1-144	2 wks post final dose	675000	Not Protected	PF3D7_1252400.e2s1_6613	PF3D7_1252400.e2s1	PF3D7_1252400	reticulocyte binding protein homologue 3, pseudogene (RH3)	Pf4500-4	0.250753
144-V05C	BSPZV1-144	2 wks post final dose	675000	Not Protected	PF3D7_0406200_8002	PF3D7_0406200	PF3D7_0406200	sexual stage-specific protein precursor (Pfs16)	Pf4500-4	0.523788
144-V05C	BSPZV1-144	2 wks post final dose	675000	Not Protected	PF3D7_1240600.iso1.exon2.amp1_2168	PF3D7_1240600.iso1.exon2.amp1	PF3D7_1240600	erythrocyte membrane protein 1, PfEMP1	Pf4000-5	0.555157
144-V05C	BSPZV1-144	2 wks post final dose	675000	Not Protected	PF3D7_1025000.e5_5084	PF3D7_1025000.e5	PF3D7_1025000	formin 2, putative	Pf4500-4	0.0686367
144-V05C	BSPZV1-144	2 wks post final dose	675000	Not Protected	PF3D7_1122700.1o1_4961	PF3D7_1122700.1o1	PF3D7_1122700	conserved Plasmodium protein, unknown function	Pf4500-4	0.27499
144-V05C	BSPZV1-144	2 wks post final dose	675000	Not Protected	PF3D7_1208100 (renamed, has duplicates)_7883	PF3D7_1208100 (renamed, has duplicates)	PF3D7_1208100	conserved Plasmodium protein, unknown function	Pf4500-4	0.0547974
144-V05C	BSPZV1-144	2 wks post final dose	675000	Not Protected	PF3D7_0207500.e1s1_8609	PF3D7_0207500.e1s1	PF3D7_0207500	serine repeat antigen 6 (SERA6)	Pf4500-4	0.561208
144-V05C	BSPZV1-144	2 wks post final dose	675000	Not Protected	PF3D7_1359600.iso1.exon1.amp1_3133	PF3D7_1359600.iso1.exon1.amp1	PF3D7_1359600	conserved Plasmodium protein, unknown function	Pf4000-5	0.502046
144-V05C	BSPZV1-144	2 wks post final dose	675000	Not Protected	PF3D7_1235400.e1s2_5177	PF3D7_1235400.e1s2	PF3D7_1235400	tetQ family GTPase, putative	Pf4500-4	0.731292
144-V05C	BSPZV1-144	2 wks post final dose	675000	Not Protected	PF3D7_0800100.iso1.exon1.amp1_723	PF3D7_0800100.iso1.exon1.amp1	PF3D7_0800100	erythrocyte membrane protein 1, PfEMP1	Pf4000-5	0.781183
144-V05C	BSPZV1-144	2 wks post final dose	675000	Not Protected	PF3D7_1406500.iso1.exon2.amp1_1090	PF3D7_1406500.iso1.exon2.amp1	PF3D7_1406500	conserved Plasmodium protein, unknown function	Pf4000-5	1.45833
144-V05C	BSPZV1-144	2 wks post final dose	675000	Not Protected	PF3D7_0514600.iso1.exon4.amp1_2351	PF3D7_0514600.iso1.exon4.amp1	PF3D7_0514600	ribose 5-phosphate epimerase, putative	Pf4000-5	0.158463
144-V05C	BSPZV1-144	2 wks post final dose	675000	Not Protected	PF3D7_1121800.s3_7691	PF3D7_1121800.s3	PF3D7_1121800	petidase, M16 family	Pf4500-4	-0.345422
144-V05C	BSPZV1-144	2 wks post final dose	675000	Not Protected	PF3D7_0213400.iso1.exon2.amp1_388	PF3D7_0213400.iso1.exon2.amp1	PF3D7_0213400	protein kinase 7	Pf4000-5	0.193511
144-V05C	BSPZV1-144	2 wks post final dose	675000	Not Protected	PF3D7_1114100.1.3o4_8984	PF3D7_1114100.1.3o4	PF3D7_1114100.1	rhomboid protease ROM1 (ROM1)	Pf4500-4	-0.486698
144-V05C	BSPZV1-144	2 wks post final dose	675000	Not Protected	PF3D7_1248300.1o1_6390	PF3D7_1248300.1o1	PF3D7_1248300	conserved Plasmodium membrane protein, unknown function	Pf4500-4	-0.232507
144-V05C	BSPZV1-144	2 wks post final dose	675000	Not Protected	PF3D7_1111800.iso1.exon2.amp1_2710	PF3D7_1111800.iso1.exon2.amp1	PF3D7_1111800	peptidyl-prolyl cis-trans isomerase, putative	Pf4000-5	0.728148
144-V05C	BSPZV1-144	2 wks post final dose	675000	Not Protected	PF3D7_0703300.iso1.exon1.amp1_3572	PF3D7_0703300.iso1.exon1.amp1	PF3D7_0703300	conserved Plasmodium protein, unknown function	Pf4000-5	-0.428897
144-V05C	BSPZV1-144	2 wks post final dose	675000	Not Protected	PF3D7_1369700.iso1.exon2.amp1_4099	PF3D7_1369700.iso1.exon2.amp1	PF3D7_1369700	U1 small nuclear ribonucleoprotein a, putative	Pf4000-5	0.0922183
144-V05C	BSPZV1-144	2 wks post final dose	675000	Not Protected	PF3D7_0729700.iso1.exon2.amp1_1872	PF3D7_0729700.iso1.exon2.amp1	PF3D7_0729700	conserved Plasmodium protein, unknown function	Pf4000-5	0.365493
144-V05C	BSPZV1-144	2 wks post final dose	675000	Not Protected	PF3D7_0807200.1o2_8457	PF3D7_0807200.1o2	PF3D7_0807200	conserved Plasmodium membrane protein, unknown function	Pf4500-4	-0.141322
144-V05C	BSPZV1-144	2 wks post final dose	675000	Not Protected	PF3D7_1471000.1o1_6446	PF3D7_1471000.1o1	PF3D7_1471000	RNA 3'-terminal phosphate cyclase-like protein, putative	Pf4500-4	0.307722
144-V05C	BSPZV1-144	2 wks post final dose	675000	Not Protected	PF3D7_1438000.e1s1_7787	PF3D7_1438000.e1s1	PF3D7_1438000	eukaryotic translation initiation factor eIF2A, putative	Pf4500-4	-0.153909
144-V05C	BSPZV1-144	2 wks post final dose	675000	Not Protected	PF3D7_0310000.iso1.exon2.amp1_939	PF3D7_0310000.iso1.exon2.amp1	PF3D7_0310000	conserved Plasmodium protein, unknown function	Pf4000-5	0.40296
144-V05C	BSPZV1-144	2 wks post final dose	675000	Not Protected	PF3D7_1130500.iso1.exon1.amp1_2447	PF3D7_1130500.iso1.exon1.amp1	PF3D7_1130500	conserved Plasmodium protein, unknown function	Pf4000-5	0.152063
144-V05C	BSPZV1-144	2 wks post final dose	675000	Not Protected	PF3D7_1013600.s2_9128	PF3D7_1013600.s2	PF3D7_1013600	conserved Plasmodium protein, unknown function	Pf4500-4	0.0229278
144-V05C	BSPZV1-144	2 wks post final dose	675000	Not Protected	MAL13P1.303e4s1_6254	MAL13P1.303e4s1	PF3D7_1360900	polyadenylate binding protein, putative	Pf4500-4	0.399645
144-V05C	BSPZV1-144	2 wks post final dose	675000	Not Protected	PF3D7_0324500.iso1.exon2.amp1_3884	PF3D7_0324500.iso1.exon2.amp1	PF3D7_0324500	rifin	Pf4000-5	0.0498135
144-V05C	BSPZV1-144	2 wks post final dose	675000	Not Protected	PF3D7_1417200.e1s3_6566	PF3D7_1417200.e1s3	PF3D7_1417200	NOT family protein, putative	Pf4500-4	0.52352
144-V05C	BSPZV1-144	2 wks post final dose	675000	Not Protected	PF3D7_1136300.e2s2_8274	PF3D7_1136300.e2s2	PF3D7_1136300	tudor staphylococcal nuclease (TSN)	Pf4500-4	0.189585
144-V05C	BSPZV1-144	2 wks post final dose	675000	Not Protected	PF3D7_1142600.e1s1_6542	PF3D7_1142600.e1s1	PF3D7_1142600	60S ribosomal protein L35ae, putative	Pf4500-4	0.0284144
144-V05C	BSPZV1-144	2 wks post final dose	675000	Not Protected	PF3D7_1435300.e1s1_7795	PF3D7_1435300.e1s1	PF3D7_1435300	NAD(P)H-dependent glutamate synthase, putative	Pf4500-4	0.0293583
144-V05C	BSPZV1-144	2 wks post final dose	675000	Not Protected	PF3D7_0219600.e1s1_8817	PF3D7_0219600.e1s1	PF3D7_0219600	replication factor C subunit 1, putative	Pf4500-4	0.965305
144-V05C	BSPZV1-144	2 wks post final dose	675000	Not Protected	PF3D7_0206900.1.1o2_4674	PF3D7_0206900.1.1o2	PF3D7_0206900.1	merozoite surface protein 5 (MSP5)	Pf4500-4	0.267009
144-V05C	BSPZV1-144	2 wks post final dose	675000	Not Protected	PF3D7_0804700.iso1.exon1.amp1_seg1_268	PF3D7_0804700.iso1.exon1.amp1_seg1	PF3D7_0804700	conserved Plasmodium protein, unknown function	Pf4000-5	0.349266
144-V05C	BSPZV1-144	2 wks post final dose	675000	Not Protected	PF3D7_1440200.4o6_8529	PF3D7_1440200.4o6	PF3D7_1440200	stromal-processing peptidase, putative (SPP)	Pf4500-4	-1.64152
144-V05C	BSPZV1-144	2 wks post final dose	675000	Not Protected	PF3D7_1461900.e1s2_9216	PF3D7_1461900.e1s2	PF3D7_1461900	valine-tRNA ligase, putative	Pf4500-4	-0.157771
144-V05C	BSPZV1-144	2 wks post final dose	675000	Not Protected	PF3D7_1468000.e8s2_8569	PF3D7_1468000.e8s2	PF3D7_1468000	conserved Plasmodium protein, unknown function	Pf4500-4	-0.294931
144-V05C	BSPZV1-144	2 wks post final dose	675000	Not Protected	PF3D7_1239500.iso1.exon1.amp2_4530	PF3D7_1239500.iso1.exon1.amp2	PF3D7_1239500	DNA gyrase subunit B	Pf4000-5	0.374226
144-V05C	BSPZV1-144	2 wks post final dose	675000	Not Protected	PF3D7_1115000.iso1.exon1.amp1_3836	PF3D7_1115000.iso1.exon1.amp1	PF3D7_1115000	conserved Plasmodium protein, unknown function	Pf4000-5	0.199903
144-V05C	BSPZV1-144	2 wks post final dose	675000	Not Protected	PF3D7_0521300.iso1.exon3.amp2_seg1_2591	PF3D7_0521300.iso1.exon3.amp2_seg1	PF3D7_0521300	conserved Plasmodium protein, unknown function	Pf4000-5	0.180293
144-V05C	BSPZV1-144	2 wks post final dose	675000	Not Protected	PF3D7_1020800.11o11_6470	PF3D7_1020800.11o11	PF3D7_1020800	dihydrolipoamide acyltransferase component E2 (DLAT)	Pf4500-4	0.129762
144-V05C	BSPZV1-144	2 wks post final dose	675000	Not Protected	PF3D7_0630800.iso1.exon5.amp1_3796	PF3D7_0630800.iso1.exon5.amp1	PF3D7_0630800	conserved Plasmodium protein, unknown function	Pf4000-5	-0.129586
144-V05C	BSPZV1-144	2 wks post final dose	675000	Not Protected	PF3D7_1450200.iso1.exon2.amp1_1250	PF3D7_1450200.iso1.exon2.amp1	PF3D7_1450200	conserved Plasmodium protein, unknown function	Pf4000-5	-0.0592071
144-V05C	BSPZV1-144	2 wks post final dose	675000	Not Protected	PF3D7_0200100 (renamed)_4770	PF3D7_0200100 (renamed)	PF3D7_0200100	erythrocyte membrane protein 1, PfEMP1 (VAR)	Pf4500-4	0.153678
144-V05C	BSPZV1-144	2 wks post final dose	675000	Not Protected	PF3D7_1450600.iso1.exon1.amp1_2471	PF3D7_1450600.iso1.exon1.amp1	PF3D7_1450600	conserved Plasmodium protein, unknown function	Pf4000-5	0.0961132
144-V05C	BSPZV1-144	2 wks post final dose	675000	Not Protected	PF3D7_1219600.iso1.exon3.amp2_2830	PF3D7_1219600.iso1.exon3.amp2	PF3D7_1219600	aminophospholipid-transporting P-ATPase	Pf4000-5	0.495882
144-V05C	BSPZV1-144	2 wks post final dose	675000	Not Protected	PF3D7_0109000.1o1_8138	PF3D7_0109000.1o1	PF3D7_0109000	photosensitized INA-labeled protein 1, PhIL1, putative	Pf4500-4	0.141158
144-V05C	BSPZV1-144	2 wks post final dose	675000	Not Protected	PF3D7_0924000.iso1.exon1.amp1_3692	PF3D7_0924000.iso1.exon1.amp1	PF3D7_0924000	patatin-like phospholipase, putative	Pf4000-5	0.0825282
144-V05C	BSPZV1-144	2 wks post final dose	675000	Not Protected	PF3D7_0923400.e1s1_6326	PF3D7_0923400.e1s1	PF3D7_0923400	conserved Plasmodium protein, unknown function	Pf4500-4	-0.0352868
144-V05C	BSPZV1-144	2 wks post final dose	675000	Not Protected	PF3D7_1434500.e2s3_6853	PF3D7_1434500.e2s3	PF3D7_1434500	dynein-related AAA-type ATPase, putative	Pf4500-4	0.0221694
144-V05C	BSPZV1-144	2 wks post final dose	675000	Not Protected	PF3D7_0217500.e1s1_8058	PF3D7_0217500.e1s1	PF3D7_0217500	calcium dependent protein kinase 1 (CDPK1)	Pf4500-4	0.549281
144-V05C	BSPZV1-144	2 wks post final dose	675000	Not Protected	PF3D7_0920200.1o1_5065	PF3D7_0920200.1o1	PF3D7_0920200	CS-domain containing protein, conserved in Apicomplexa	Pf4500-4	-0.0551589
144-V05C	BSPZV1-144	2 wks post final dose	675000	Not Protected	PF3D7_0828700.iso1.exon1.amp1_1992	PF3D7_0828700.iso1.exon1.amp1	PF3D7_0828700	conserved Plasmodium protein, unknown function	Pf4000-5	0.75784
144-V05C	BSPZV1-144	2 wks post final dose	675000	Not Protected	PF3D7_1103900.iso1.exon1.amp1_3812	PF3D7_1103900.iso1.exon1.amp1	PF3D7_1103900	conserved Plasmodium protein, unknown function	Pf4000-5	0.215333
144-V05C	BSPZV1-144	2 wks post final dose	675000	Not Protected	PF3D7_0220700.2o2_4666	PF3D7_0220700.2o2	PF3D7_0220700	Plasmodium exported protein (hyp9), unknown function	Pf4500-4	0.353361
144-V05C	BSPZV1-144	2 wks post final dose	675000	Not Protected	PF3D7_1460000.1o1_6709	PF3D7_1460000.1o1	PF3D7_1460000	biotin protein ligase, putative	Pf4500-4	2.91882
144-V05C	BSPZV1-144	2 wks post final dose	675000	Not Protected	PF3D7_0312400.2o7_8753	PF3D7_0312400.2o7	PF3D7_0312400	glycogen synthase kinase 3 (GSK3)	Pf4500-4	2.34155
144-V05C	BSPZV1-144	2 wks post final dose	675000	Not Protected	PF3D7_0511100.iso1.exon2.amp1_1537	PF3D7_0511100.iso1.exon2.amp1	PF3D7_0511100	conserved Plasmodium protein, unknown function	Pf4000-5	0.288156
144-V05C	BSPZV1-144	2 wks post final dose	675000	Not Protected	PF3D7_1327500.iso1.exon3.amp1_2160	PF3D7_1327500.iso1.exon3.amp1	PF3D7_1327500	conserved Plasmodium protein, unknown function	Pf4000-5	0.592532
144-V05C	BSPZV1-144	2 wks post final dose	675000	Not Protected	PF3D7_0311800.e3_7124	PF3D7_0311800.e3	PF3D7_0311800	conserved protein, unknown function	Pf4500-4	0.722565
144-V05C	BSPZV1-144	2 wks post final dose	675000	Not Protected	PF3D7_1428000.2o7_7021	PF3D7_1428000.2o7	PF3D7_1428000	conserved Plasmodium membrane protein, unknown function	Pf4500-4	-0.141109
144-V05C	BSPZV1-144	2 wks post final dose	675000	Not Protected	PF3D7_0926300.iso1.exon1.amp1_2974	PF3D7_0926300.iso1.exon1.amp1	PF3D7_0926300	protein kinase, putative	Pf4000-5	0.198178
144-V05C	BSPZV1-144	2 wks post final dose	675000	Not Protected	PF3D7_0404700.2o2_6502	PF3D7_0404700.2o2	PF3D7_0404700	dipeptidyl peptidase 3 (DPAP3)	Pf4500-4	0.112229
144-V05C	BSPZV1-144	2 wks post final dose	675000	Not Protected	PF3D7_0510000.2o7_6781	PF3D7_0510000.2o7	PF3D7_0510000	conserved Plasmodium protein, unknown function	Pf4500-4	-0.264306
144-V05C	BSPZV1-144	2 wks post final dose	675000	Not Protected	PF3D7_0929800.iso1.exon1.amp1_4123	PF3D7_0929800.iso1.exon1.amp1	PF3D7_0929800	conserved Plasmodium protein, unknown function	Pf4000-5	0.554214
144-V05C	BSPZV1-144	2 wks post final dose	675000	Not Protected	PF3D7_1344500.3o3_8721	PF3D7_1344500.3o3	PF3D7_1344500	conserved Plasmodium protein, unknown function	Pf4500-4	-0.781492
144-V05C	BSPZV1-144	2 wks post final dose	675000	Not Protected	PF3D7_0827600.2o2_6223	PF3D7_0827600.2o2	PF3D7_0827600	conserved Plasmodium protein, unknown function	Pf4500-4	4.1169
144-V05C	BSPZV1-144	2 wks post final dose	675000	Not Protected	PF3D7_0219900.2o2_6693	PF3D7_0219900.2o2	PF3D7_0219900	Plasmodium exported protein, unknown function	Pf4500-4	0.462353
144-V05C	BSPZV1-144	2 wks post final dose	675000	Not Protected	PF3D7_1314200.e1s3_7715	PF3D7_1314200.e1s3	PF3D7_1314200	telomerase reverse transcriptase, putative (TERT)	Pf4500-4	-0.339561
144-V05C	BSPZV1-144	2 wks post final dose	675000	Not Protected	PF3D7_1440000.iso1.exon5.amp2_seg1_4036	PF3D7_1440000.iso1.exon5.amp2_seg1	PF3D7_1440000	conserved Plasmodium protein, unknown function	Pf4000-5	0.606773
144-V05C	BSPZV1-144	2 wks post final dose	675000	Not Protected	PF3D7_1214900.iso1.exon4.amp1_4373	PF3D7_1214900.iso1.exon4.amp1	PF3D7_1214900	conserved Plasmodium membrane protein, unknown function	Pf4000-5	-0.124182
144-V05C	BSPZV1-144	2 wks post final dose	675000	Not Protected	PF3D7_1368200.e1s1_8936	PF3D7_1368200.e1s1	PF3D7_1368200	RNAse L inhibitor protein, putative	Pf4500-4	-0.367614
144-V05C	BSPZV1-144	2 wks post final dose	675000	Not Protected	PF3D7_0321600.e1_7117	PF3D7_0321600.e1	PF3D7_0321600	ATP-dependent RNA helicase, putative	Pf4500-4	0.0894215
144-V05C	BSPZV1-144	2 wks post final dose	675000	Not Protected	PF3D7_1202600.e1_8857	PF3D7_1202600.e1	PF3D7_1202600	conserved protein, unknown function	Pf4500-4	1.77522
144-V05C	BSPZV1-144	2 wks post final dose	675000	Not Protected	PF3D7_0215100.4o7_5257	PF3D7_0215100.4o7	PF3D7_0215100	RING zinc finger protein, putative	Pf4500-4	-1.53555
144-V05C	BSPZV1-144	2 wks post final dose	675000	Not Protected	PF3D7_0501000.e1s1_4842	PF3D7_0501000.e1s1	PF3D7_0501000	Plasmodium exported protein, unknown function	Pf4500-4	0.239215
144-V05C	BSPZV1-144	2 wks post final dose	675000	Not Protected	PF3D7_0515200.1o2_8697	PF3D7_0515200.1o2	PF3D7_0515200	conserved Plasmodium protein, unknown function	Pf4500-4	-0.497262
144-V05C	BSPZV1-144	2 wks post final dose	675000	Not Protected	PF3D7_1224200.1o5_7077	PF3D7_1224200.1o5	PF3D7_1224200	conserved Plasmodium protein, unknown function	Pf4500-4	0.219832
144-V05C	BSPZV1-144	2 wks post final dose	675000	Not Protected	PF3D7_0904300.iso1.exon1.amp1_2806	PF3D7_0904300.iso1.exon1.amp1	PF3D7_0904300	conserved protein, unknown function	Pf4000-5	-0.00515668
144-V05C	BSPZV1-144	2 wks post final dose	675000	Not Protected	PF3D7_0211300.iso1.exon2.amp1_77	PF3D7_0211300.iso1.exon2.amp1	PF3D7_0211300	conserved Plasmodium protein, unknown function	Pf4000-5	0.379562
144-V05C	BSPZV1-144	2 wks post final dose	675000	Not Protected	PF3D7_1405000.iso1.exon5.amp1_4076	PF3D7_1405000.iso1.exon5.amp1	PF3D7_1405000	conserved Plasmodium protein, unknown function	Pf4000-5	0.0873814
144-V05C	BSPZV1-144	2 wks post final dose	675000	Not Protected	PF3D7_0935700.2o2_7260	PF3D7_0935700.2o2	PF3D7_0935700	Plasmodium exported protein, unknown function	Pf4500-4	0.0291696
144-V05C	BSPZV1-144	2 wks post final dose	675000	Not Protected	PF3D7_0214300.iso1.exon1.amp1_2559	PF3D7_0214300.iso1.exon1.amp1	PF3D7_0214300	conserved Plasmodium protein, unknown function	Pf4000-5	0.545016
144-V05C	BSPZV1-144	2 wks post final dose	675000	Not Protected	PF3D7_0321800.iso1.exon1.amp3_3360	PF3D7_0321800.iso1.exon1.amp3	PF3D7_0321800	conserved Plasmodium protein, unknown function	Pf4000-5	0.125448
144-V05C	BSPZV1-144	2 wks post final dose	675000	Not Protected	PF3D7_1342300.1o1_5251	PF3D7_1342300.1o1	PF3D7_1342300	tetratricopeptide repeat family protein, putative	Pf4500-4	-1.03805
144-V05C	BSPZV1-144	2 wks post final dose	675000	Not Protected	PF3D7_0704700.iso1.exon1.amp2_seg2_1442	PF3D7_0704700.iso1.exon1.amp2_seg2	PF3D7_0704700	conserved Plasmodium membrane protein, unknown function	Pf4000-5	0.652958
144-V05C	BSPZV1-144	2 wks post final dose	675000	Not Protected	PF3D7_1139300.e3s1_5140	PF3D7_1139300.e3s1	PF3D7_1139300	transcription factor with AP2 domain(s) (ApiAP2)	Pf4500-4	0.293807
144-V05C	BSPZV1-144	2 wks post final dose	675000	Not Protected	PF3D7_0628900.iso1.exon1.amp2_4243	PF3D7_0628900.iso1.exon1.amp2	PF3D7_0628900	RAP protein, putative	Pf4000-5	0.0663581
144-V05C	BSPZV1-144	2 wks post final dose	675000	Not Protected	PF3D7_1040000.iso1.exon2.amp1_1585	PF3D7_1040000.iso1.exon2.amp1	PF3D7_1040000	rifin	Pf4000-5	1.3446
144-V05C	BSPZV1-144	2 wks post final dose	675000	Not Protected	PF3D7_1348800.1o4_7380	PF3D7_1348800.1o4	PF3D7_1348800	E1-E2 ATPase, putative	Pf4500-4	0.365371
144-V05C	BSPZV1-144	2 wks post final dose	675000	Not Protected	PF3D7_1462400.e1s3_5416	PF3D7_1462400.e1s3	PF3D7_1462400	conserved Plasmodium protein, unknown function	Pf4500-4	0.932381
144-V05C	BSPZV1-144	2 wks post final dose	675000	Not Protected	PF3D7_1417900.iso1.exon1.amp1_2359	PF3D7_1417900.iso1.exon1.amp1	PF3D7_1417900	conserved Plasmodium protein, unknown function	Pf4000-5	0.413255
144-V05C	BSPZV1-144	2 wks post final dose	675000	Not Protected	PF3D7_1138000.iso1.exon1.amp3_4227	PF3D7_1138000.iso1.exon1.amp3	PF3D7_1138000	conserved Plasmodium protein, unknown function	Pf4000-5	1.26024
144-V05C	BSPZV1-144	2 wks post final dose	675000	Not Protected	PF3D7_0719100.iso1.exon2.amp1_947	PF3D7_0719100.iso1.exon2.amp1	PF3D7_0719100	conserved Plasmodium protein, unknown function	Pf4000-5	0.325606
144-V05C	BSPZV1-144	2 wks post final dose	675000	Not Protected	PF3D7_0414200.iso2.exon3.amp1_1186	PF3D7_0414200.iso2.exon3.amp1	PF3D7_0414200	calmodulin-like protein	Pf4000-5	0.250873
144-V05C	BSPZV1-144	2 wks post final dose	675000	Not Protected	PF3D7_0904700.2o2_6686	PF3D7_0904700.2o2	PF3D7_0904700	bacterial histone-like protein (HU)	Pf4500-4	0.111338
144-V05C	BSPZV1-144	2 wks post final dose	675000	Not Protected	PF3D7_0615400.iso1.exon9.amp1_3102	PF3D7_0615400.iso1.exon9.amp1	PF3D7_0615400	ribonuclease, putative	Pf4000-5	0.19576
144-V05C	BSPZV1-144	2 wks post final dose	675000	Not Protected	PF3D7_1475400.e2s2_5688	PF3D7_1475400.e2s2	PF3D7_1475400	cysteine repeat modular protein 4 (CRMP4)	Pf4500-4	0.14238
144-V05C	BSPZV1-144	2 wks post final dose	675000	Not Protected	PF3D7_1032700.1o1_5895	PF3D7_1032700.1o1	PF3D7_1032700	conserved Plasmodium protein, unknown function	Pf4500-4	-1.20827
144-V05C	BSPZV1-144	2 wks post final dose	675000	Not Protected	PF3D7_1013700.iso1.exon1.amp1_3828	PF3D7_1013700.iso1.exon1.amp1	PF3D7_1013700	conserved Plasmodium protein, unknown function	Pf4000-5	-0.222392
144-V05C	BSPZV1-144	2 wks post final dose	675000	Not Protected	PF3D7_1363600.1o1_6398	PF3D7_1363600.1o1	PF3D7_1363600	conserved Plasmodium protein, unknown function	Pf4500-4	-0.266389
144-V05C	BSPZV1-144	2 wks post final dose	675000	Not Protected	PF3D7_1361200.iso1.exon6.amp1_1849	PF3D7_1361200.iso1.exon6.amp1	PF3D7_1361200	conserved Plasmodium protein, unknown function	Pf4000-5	0.343972
144-V05C	BSPZV1-144	2 wks post final dose	675000	Not Protected	PF3D7_0825600.iso1.exon1.amp1_3549	PF3D7_0825600.iso1.exon1.amp1	PF3D7_0825600	cytochrome c oxidase assembly protein, putative	Pf4000-5	0.337563
144-V05C	BSPZV1-144	2 wks post final dose	675000	Not Protected	PF3D7_1214300.1o2_7596	PF3D7_1214300.1o2	PF3D7_1214300	geranylgeranyltransferase type2 beta subunit, putative	Pf4500-4	-0.451772
144-V05C	BSPZV1-144	2 wks post final dose	675000	Not Protected	PF3D7_1422800.1o1_8769	PF3D7_1422800.1o1	PF3D7_1422800	actin-related protein homolog, arp4 homolog	Pf4500-4	-0.220339
144-V05C	BSPZV1-144	2 wks post final dose	675000	Not Protected	PF3D7_1300600.iso1.exon1.amp1_4179	PF3D7_1300600.iso1.exon1.amp1	PF3D7_1300600	rifin	Pf4000-5	0.205064
144-V05C	BSPZV1-144	2 wks post final dose	675000	Not Protected	PF3D7_1466600.iso1.exon1.amp1_2136	PF3D7_1466600.iso1.exon1.amp1	PF3D7_1466600	conserved Plasmodium protein, unknown function	Pf4000-5	0.252702
144-V05C	BSPZV1-144	2 wks post final dose	675000	Not Protected	PF3D7_0915300.iso1.exon1.amp1_149	PF3D7_0915300.iso1.exon1.amp1	PF3D7_0915300	conserved Plasmodium protein, unknown function	Pf4000-5	1.52686
144-V05C	BSPZV1-144	2 wks post final dose	675000	Not Protected	PF3D7_0305400.iso1.exon1.amp1_1474	PF3D7_0305400.iso1.exon1.amp1	PF3D7_0305400	conserved Plasmodium protein, unknown function	Pf4000-5	0.316414
144-V05C	BSPZV1-144	2 wks post final dose	675000	Not Protected	PF3D7_1115700.e1s1_7476	PF3D7_1115700.e1s1	PF3D7_1115700	cysteine proteinase falcipain 2a	Pf4500-4	0.180266
144-V05C	BSPZV1-144	2 wks post final dose	675000	Not Protected	PF3D7_0214900.e2s1_9224	PF3D7_0214900.e2s1	PF3D7_0214900	rhoptry neck protein 6 (RON6)	Pf4500-4	-0.00830513
144-V05C	BSPZV1-144	2 wks post final dose	675000	Not Protected	PF3D7_0605800.iso1.exon1.amp1_3716	PF3D7_0605800.iso1.exon1.amp1	PF3D7_0605800	DNA repair-like protein, putative	Pf4000-5	0.143485
144-V05C	BSPZV1-144	2 wks post final dose	675000	Not Protected	PF3D7_0714400.1o2_6111	PF3D7_0714400.1o2	PF3D7_0714400	calmodulin, putative	Pf4500-4	0.01723
144-V05C	BSPZV1-144	2 wks post final dose	675000	Not Protected	PF3D7_1254400.iso1.exon2.amp1_4171	PF3D7_1254400.iso1.exon2.amp1	PF3D7_1254400	rifin	Pf4000-5	0.935213
144-V05C	BSPZV1-144	2 wks post final dose	675000	Not Protected	PF3D7_1228100.iso1.exon1.amp1_2423	PF3D7_1228100.iso1.exon1.amp1	PF3D7_1228100	leucine-rich repeat protein	Pf4000-5	-0.15405
144-V05C	BSPZV1-144	2 wks post final dose	675000	Not Protected	PF3D7_0501900.iso1.exon1.amp1_2998	PF3D7_0501900.iso1.exon1.amp1	PF3D7_0501900	conserved Plasmodium protein, unknown function	Pf4000-5	0.0723961
144-V05C	BSPZV1-144	2 wks post final dose	675000	Not Protected	PF3D7_1217400.1o1_8218	PF3D7_1217400.1o1	PF3D7_1217400	conserved Plasmodium protein, unknown function	Pf4500-4	0.1642
144-V05C	BSPZV1-144	2 wks post final dose	675000	Not Protected	PF3D7_0521100.iso1.exon6.amp1_1513	PF3D7_0521100.iso1.exon6.amp1	PF3D7_0521100	conserved Plasmodium protein, unknown function	Pf4000-5	0.231443
144-V05C	BSPZV1-144	2 wks post final dose	675000	Not Protected	PF3D7_1358200.iso1.exon2.amp1_364	PF3D7_1358200.iso1.exon2.amp1	PF3D7_1358200	conserved Plasmodium protein, unknown function	Pf4000-5	0.250374
144-V05C	BSPZV1-144	2 wks post final dose	675000	Not Protected	PF3D7_1028100.1o1_7332	PF3D7_1028100.1o1	PF3D7_1028100	protoporphyrinogen oxidase	Pf4500-4	-0.164446
144-V05C	BSPZV1-144	2 wks post final dose	675000	Not Protected	PF3D7_1148900.iso1.exon1.amp1_1825	PF3D7_1148900.iso1.exon1.amp1	PF3D7_1148900	probable protein, unknown function	Pf4000-5	0.341943
144-V05C	BSPZV1-144	2 wks post final dose	675000	Not Protected	PF3D7_1306300.iso1.exon1.amp1_4387	PF3D7_1306300.iso1.exon1.amp1	PF3D7_1306300	SAM dependent methyltransferase, putative	Pf4000-5	-0.1578
144-V05C	BSPZV1-144	2 wks post final dose	675000	Not Protected	PF3D7_1433500.e1s2_6925	PF3D7_1433500.e1s2	PF3D7_1433500	DNA topoisomerase II, putative	Pf4500-4	0.795725
144-V05C	BSPZV1-144	2 wks post final dose	675000	Not Protected	PF3D7_0718100.iso1.exon2.amp1_3333	PF3D7_0718100.iso1.exon2.amp1	PF3D7_0718100	exported serine/threonine protein kinase	Pf4000-5	0.237837
144-V05C	BSPZV1-144	2 wks post final dose	675000	Not Protected	PF3D7_1012300.e1s1_7739	PF3D7_1012300.e1s1	PF3D7_1012300	ubiquinol-cytochrome c reductase complex subunit, putative	Pf4500-4	-0.526092
144-V05C	BSPZV1-144	2 wks post final dose	675000	Not Protected	PF3D7_1131300.iso1.exon1.amp1_3054	PF3D7_1131300.iso1.exon1.amp1	PF3D7_1131300	conserved Plasmodium protein, unknown function	Pf4000-5	0.370249
144-V05C	BSPZV1-144	2 wks post final dose	675000	Not Protected	PF3D7_0806600.e2s1_5153	PF3D7_0806600.e2s1	PF3D7_0806600	kinesin-like protein, putative	Pf4500-4	0.387035
144-V05C	BSPZV1-144	2 wks post final dose	675000	Not Protected	PF3D7_1149200.e2s1_6829	PF3D7_1149200.e2s1	PF3D7_1149200	ring-infected erythrocyte surface antigen	Pf4500-4	0.626161
144-V05C	BSPZV1-144	2 wks post final dose	675000	Not Protected	PF3D7_1365500.e2s1_6901	PF3D7_1365500.e2s1	PF3D7_1365500	glycine cleavage T protein, putative (GCVT)	Pf4500-4	-0.759155
144-V05C	BSPZV1-144	2 wks post final dose	675000	Not Protected	PF3D7_1018400.4o4_6973	PF3D7_1018400.4o4	PF3D7_1018400	conserved Plasmodium protein, unknown function	Pf4500-4	-0.0664081
144-V05C	BSPZV1-144	2 wks post final dose	675000	Not Protected	PF3D7_1149600.2o2_5608	PF3D7_1149600.2o2	PF3D7_1149600	DnaJ protein, putative	Pf4500-4	0.21453
144-V05C	BSPZV1-144	2 wks post final dose	675000	Not Protected	PF3D7_1306500.e3s2_7428	PF3D7_1306500.e3s2	PF3D7_1306500	MORN repeat protein, putative	Pf4500-4	1.54401
144-V05C	BSPZV1-144	2 wks post final dose	675000	Not Protected	PF3D7_1248600.1o3_7069	PF3D7_1248600.1o3	PF3D7_1248600	conserved Plasmodium protein, unknown function	Pf4500-4	-0.12254
144-V05C	BSPZV1-144	2 wks post final dose	675000	Not Protected	PF3D7_0512500.iso1.exon4.amp1_4195	PF3D7_0512500.iso1.exon4.amp1	PF3D7_0512500	conserved Plasmodium protein, unknown function	Pf4000-5	0.0974092
144-V05C	BSPZV1-144	2 wks post final dose	675000	Not Protected	PF3D7_1426900.iso1.exon1.amp1_3264	PF3D7_1426900.iso1.exon1.amp1	PF3D7_1426900	ubiquinol-cytochrome c reductase hinge protein, putative	Pf4000-5	0.148673
144-V05C	BSPZV1-144	2 wks post final dose	675000	Not Protected	PF3D7_1457400.iso1.exon1.amp4_755	PF3D7_1457400.iso1.exon1.amp4	PF3D7_1457400	conserved Plasmodium protein, unknown function	Pf4000-5	0.226206
144-V05C	BSPZV1-144	2 wks post final dose	675000	Not Protected	PF3D7_0704600.iso1.exon5.amp1_1362	PF3D7_0704600.iso1.exon5.amp1	PF3D7_0704600	ubiquitin transferase, putative	Pf4000-5	0.107368
144-V05C	BSPZV1-144	2 wks post final dose	675000	Not Protected	PF3D7_1478800.2o2_7548	PF3D7_1478800.2o2	PF3D7_1478800	Plasmodium exported protein, unknown function	Pf4500-4	0.150558
144-V05C	BSPZV1-144	2 wks post final dose	675000	Not Protected	PF3D7_0709100.e1s1_4890	PF3D7_0709100.e1s1	PF3D7_0709100	Cg1 protein	Pf4500-4	-0.191023
144-V05C	BSPZV1-144	2 wks post final dose	675000	Not Protected	PF3D7_1419900.iso1.exon1.amp1_1609	PF3D7_1419900.iso1.exon1.amp1	PF3D7_1419900	conserved protein, unknown function	Pf4000-5	0.598428
144-V05C	BSPZV1-144	2 wks post final dose	675000	Not Protected	PF3D7_1203100.iso1.exon2.amp1_963	PF3D7_1203100.iso1.exon2.amp1	PF3D7_1203100	conserved Plasmodium protein, unknown function	Pf4000-5	0.348644
144-V05C	BSPZV1-144	2 wks post final dose	675000	Not Protected	PF3D7_0718100.iso1.exon1.amp2_1370	PF3D7_0718100.iso1.exon1.amp2	PF3D7_0718100	exported serine/threonine protein kinase	Pf4000-5	0.596989
144-V05C	BSPZV1-144	2 wks post final dose	675000	Not Protected	PF3D7_0104300.3o3_7093	PF3D7_0104300.3o3	PF3D7_0104300	ubiquitin carboxyl-terminal hydrolase, putative	Pf4500-4	-0.451509
144-V05C	BSPZV1-144	2 wks post final dose	675000	Not Protected	PF3D7_1336000.iso1.exon1.amp1_3557	PF3D7_1336000.iso1.exon1.amp1	PF3D7_1336000	conserved Plasmodium protein, unknown function	Pf4000-5	-0.195845
144-V05C	BSPZV1-144	2 wks post final dose	675000	Not Protected	PF3D7_0618900.iso2.exon1.amp1_604	PF3D7_0618900.iso2.exon1.amp1	PF3D7_0618900	N-acetylglucosamine transferase (GPI1)	Pf4000-5	-0.0405571
144-V05C	BSPZV1-144	2 wks post final dose	675000	Not Protected	PF3D7_0525000.1o1_7931	PF3D7_0525000.1o1	PF3D7_0525000	zinc finger protein, putative	Pf4500-4	0.510871
144-V05C	BSPZV1-144	2 wks post final dose	675000	Not Protected	PF3D7_1322200.iso1.exon9.amp2_484	PF3D7_1322200.iso1.exon9.amp2	PF3D7_1322200	conserved Plasmodium protein, unknown function	Pf4000-5	0.364417
144-V05C	BSPZV1-144	2 wks post final dose	675000	Not Protected	PF3D7_0419700.1o1_8146	PF3D7_0419700.1o1	PF3D7_0419700	apical merozoite protein (Pf34)	Pf4500-4	1.12571
144-V05C	BSPZV1-144	2 wks post final dose	675000	Not Protected	PF3D7_1444100.e1s1_6877	PF3D7_1444100.e1s1	PF3D7_1444100	conserved Plasmodium protein, unknown function	Pf4500-4	0.32566
144-V05C	BSPZV1-144	2 wks post final dose	675000	Not Protected	PF3D7_0904100.iso1.exon4.amp2_1953	PF3D7_0904100.iso1.exon4.amp2	PF3D7_0904100	adapter-related protein, putative	Pf4000-5	-0.0477017
144-V05C	BSPZV1-144	2 wks post final dose	675000	Not Protected	PF3D7_1219100.e1s1_9152	PF3D7_1219100.e1s1	PF3D7_1219100	clathrin heavy chain, putative	Pf4500-4	-0.250723
144-V05C	BSPZV1-144	2 wks post final dose	675000	Not Protected	PF3D7_1457300.e1s1_5185	PF3D7_1457300.e1s1	PF3D7_1457300	conserved Plasmodium protein, unknown function	Pf4500-4	0.660439
144-V05C	BSPZV1-144	2 wks post final dose	675000	Not Protected	PF3D7_0209000.s3_6279	PF3D7_0209000.s3	PF3D7_0209000	6-cysteine protein (P230)	Pf4500-4	-0.0344976
144-V05C	BSPZV1-144	2 wks post final dose	675000	Not Protected	PF3D7_0215000.1o1_6494	PF3D7_0215000.1o1	PF3D7_0215000	acyl-CoA synthetase, PfACS9 (ACS9)	Pf4500-4	-0.0242768
144-V05C	BSPZV1-144	2 wks post final dose	675000	Not Protected	PF3D7_0929400.e9s1_8913	PF3D7_0929400.e9s1	PF3D7_0929400	high molecular weight rhoptry protein 2 (RhopH2)	Pf4500-4	-0.541707
144-V05C	BSPZV1-144	2 wks post final dose	675000	Not Protected	PF3D7_0531000.1o1_4746	PF3D7_0531000.1o1	PF3D7_0531000	conserved Plasmodium protein, unknown function	Pf4500-4	1.58836
144-V05C	BSPZV1-144	2 wks post final dose	675000	Not Protected	PF3D7_1446700.1o8_8122	PF3D7_1446700.1o8	PF3D7_1446700	conserved Plasmodium protein, unknown function	Pf4500-4	0.0906881
144-V05C	BSPZV1-144	2 wks post final dose	675000	Not Protected	PF3D7_1220300.iso1.exon1.amp1_2695	PF3D7_1220300.iso1.exon1.amp1	PF3D7_1220300	Cell cycle associated protein, putative	Pf4000-5	0.552595
144-V05C	BSPZV1-144	2 wks post final dose	675000	Not Protected	PF3D7_0626900.1o1_4986	PF3D7_0626900.1o1	PF3D7_0626900	mitochondrial ribosomal protein L46 precursor, putative	Pf4500-4	1.01866
144-V05C	BSPZV1-144	2 wks post final dose	675000	Not Protected	PF3D7_1321700.e2s1_8314	PF3D7_1321700.e2s1	PF3D7_1321700	splicing factor, putative	Pf4500-4	0.548491
144-V05C	BSPZV1-144	2 wks post final dose	675000	Not Protected	PF3D7_0902600.2o3_8194	PF3D7_0902600.2o3	PF3D7_0902600	serine/threonine protein kinase, FIKK family (FIKK9.7)	Pf4500-4	0.131873
144-V05C	BSPZV1-144	2 wks post final dose	675000	Not Protected	PF3D7_0705500.iso1.exon2.amp3_1354	PF3D7_0705500.iso1.exon2.amp3	PF3D7_0705500	inositol-phosphate phosphatase, putative	Pf4000-5	0.917713
144-V05C	BSPZV1-144	2 wks post final dose	675000	Not Protected	PF3D7_1120700.iso1.exon1.amp2_3653	PF3D7_1120700.iso1.exon1.amp2	PF3D7_1120700	conserved Plasmodium protein, unknown function	Pf4000-5	0.698809
144-V05C	BSPZV1-144	2 wks post final dose	675000	Not Protected	PF3D7_1444100.e8s2_5991	PF3D7_1444100.e8s2	PF3D7_1444100	conserved Plasmodium protein, unknown function	Pf4500-4	1.41106
144-V05C	BSPZV1-144	2 wks post final dose	675000	Not Protected	PF3D7_1413700.iso1.exon9.amp1_3629	PF3D7_1413700.iso1.exon9.amp1	PF3D7_1413700	conserved Plasmodium protein, unknown function	Pf4000-5	0.0731491
144-V05C	BSPZV1-144	2 wks post final dose	675000	Not Protected	PF3D7_1356900.iso1.exon3.amp1_3222	PF3D7_1356900.iso1.exon3.amp1	PF3D7_1356900	protein kinase 5	Pf4000-5	0.478651
144-V05C	BSPZV1-144	2 wks post final dose	675000	Not Protected	PF3D7_0831300.2o2_7356	PF3D7_0831300.2o2	PF3D7_0831300	Plasmodium exported protein, unknown function (GEXP13)	Pf4500-4	-0.0211465
144-V05C	BSPZV1-144	2 wks post final dose	675000	Not Protected	PF3D7_0718300.e6s1_8625	PF3D7_0718300.e6s1	PF3D7_0718300	cysteine repeat modular protein 2 (CRMP2)	Pf4500-4	0.208209
144-V05C	BSPZV1-144	2 wks post final dose	675000	Not Protected	PF3D7_1440900.iso1.exon1.amp1_915	PF3D7_1440900.iso1.exon1.amp1	PF3D7_1440900	conserved Plasmodium protein, unknown function	Pf4000-5	0.259169
144-V05C	BSPZV1-144	2 wks post final dose	675000	Not Protected	PF3D7_1144500.1o1_6422	PF3D7_1144500.1o1	PF3D7_1144500	ubiquitin activating enzyme (E1) subunit Aos1, putative (AOS1)	Pf4500-4	0.203199
144-V05C	BSPZV1-144	2 wks post final dose	675000	Not Protected	PF3D7_0212900.1o1_9032	PF3D7_0212900.1o1	PF3D7_0212900	Leu/Phe-tRNA protein transferase, putative	Pf4500-4	-0.653894
144-V05C	BSPZV1-144	2 wks post final dose	675000	Not Protected	PF3D7_1357700.iso1.exon4.amp1_4531	PF3D7_1357700.iso1.exon4.amp1	PF3D7_1357700	U3 snoRNA-associated small subunit rRNA processing protein, putative	Pf4000-5	-0.268151
144-V05C	BSPZV1-144	2 wks post final dose	675000	Not Protected	PF3D7_1233200.iso2.exon1.amp3_seg1_1729	PF3D7_1233200.iso2.exon1.amp3_seg1	PF3D7_1233200	conserved Plasmodium protein, unknown function	Pf4000-5	0.914775
144-V05C	BSPZV1-144	2 wks post final dose	675000	Not Protected	PF3D7_0624900.iso1.exon3.amp1_2064	PF3D7_0624900.iso1.exon3.amp1	PF3D7_0624900	conserved Plasmodium protein, unknown function	Pf4000-5	0.289777
144-V05C	BSPZV1-144	2 wks post final dose	675000	Not Protected	PF3D7_0609500.iso1.exon10.amp1_4483	PF3D7_0609500.iso1.exon10.amp1	PF3D7_0609500	conserved Plasmodium protein, unknown function	Pf4000-5	-0.458516
144-V05C	BSPZV1-144	2 wks post final dose	675000	Not Protected	PF3D7_1141300.iso1.exon2.amp1_3924	PF3D7_1141300.iso1.exon2.amp1	PF3D7_1141300	conserved Plasmodium protein, unknown function	Pf4000-5	0.410725
144-V05C	BSPZV1-144	2 wks post final dose	675000	Not Protected	PF3D7_0720300.iso1.exon1.amp1_2671	PF3D7_0720300.iso1.exon1.amp1	PF3D7_0720300	conserved Plasmodium protein, unknown function	Pf4000-5	0.247042
144-V05C	BSPZV1-144	2 wks post final dose	675000	Not Protected	PF3D7_0302900.e1s1_5473	PF3D7_0302900.e1s1	PF3D7_0302900	exportin 1, putative	Pf4500-4	0.744227
144-V05C	BSPZV1-144	2 wks post final dose	675000	Not Protected	PF3D7_0511400.1o1_4698	PF3D7_0511400.1o1	PF3D7_0511400	conserved Plasmodium protein, unknown function	Pf4500-4	-0.0777456
144-V05C	BSPZV1-144	2 wks post final dose	675000	Not Protected	PF3D7_0511400_8865	PF3D7_0511400	PF3D7_0511400	conserved Plasmodium protein, unknown function	Pf4500-4	0.233984
144-V05C	BSPZV1-144	2 wks post final dose	675000	Not Protected	PF3D7_0303900.e2s1_7452	PF3D7_0303900.e2s1	PF3D7_0303900	conserved Plasmodium protein, unknown function	Pf4500-4	-1.35524
144-V05C	BSPZV1-144	2 wks post final dose	675000	Not Protected	PF3D7_0619800.iso1.exon1.amp3_747	PF3D7_0619800.iso1.exon1.amp3	PF3D7_0619800	conserved Plasmodium membrane protein, unknown function	Pf4000-5	0.0894297
144-V05C	BSPZV1-144	2 wks post final dose	675000	Not Protected	PF3D7_1458700.1o1_5273	PF3D7_1458700.1o1	PF3D7_1458700	conserved Plasmodium protein, unknown function	Pf4500-4	1.11792
144-V05C	BSPZV1-144	2 wks post final dose	675000	Not Protected	PF3D7_1136200.5o5_9080	PF3D7_1136200.5o5	PF3D7_1136200	conserved Plasmodium protein, unknown function	Pf4500-4	1.22281
144-V05C	BSPZV1-144	2 wks post final dose	675000	Not Protected	PF3D7_1430000.1o3_7284	PF3D7_1430000.1o3	PF3D7_1430000	conserved Plasmodium protein, unknown function	Pf4500-4	0.431982
144-V05C	BSPZV1-144	2 wks post final dose	675000	Not Protected	PF3D7_1451800.e1_5129	PF3D7_1451800.e1	PF3D7_1451800	sortilin, putative	Pf4500-4	1.38497
144-V05C	BSPZV1-144	2 wks post final dose	675000	Not Protected	PF3D7_0511800.e1_5680	PF3D7_0511800.e1	PF3D7_0511800	myo-inositol 1-phosphate synthase, putative	Pf4500-4	-0.6929
144-V05C	BSPZV1-144	2 wks post final dose	675000	Not Protected	PF3D7_1026600.iso1.exon1.amp2_3357	PF3D7_1026600.iso1.exon1.amp2	PF3D7_1026600	conserved Plasmodium protein, unknown function	Pf4000-5	-0.0229494
144-V05C	BSPZV1-144	2 wks post final dose	675000	Not Protected	PFC10_API0036.iso1.exon1.amp1_1753	PFC10_API0036.iso1.exon1.amp1	PFC10_API0036	apicoplast ribosomal protein L14 (rpl14)	Pf4000-5	0.213626
144-V05C	BSPZV1-144	2 wks post final dose	675000	Not Protected	PF3D7_0109900.iso2.exon6.amp1_short_4028	PF3D7_0109900.iso2.exon6.amp1_short	PF3D7_0109900	phosphatidate cytidylyltransferase, putative	Pf4000-5	-0.0546762
144-V05C	BSPZV1-144	2 wks post final dose	675000	Not Protected	PF3D7_1356800.e1s3_7141	PF3D7_1356800.e1s3	PF3D7_1356800	serine/threonine protein kinase, putative (ARK3)	Pf4500-4	0.27276
144-V05C	BSPZV1-144	2 wks post final dose	675000	Not Protected	PF3D7_1147800.iso2.exon2.amp2_4547	PF3D7_1147800.iso2.exon2.amp2	PF3D7_1147800	merozoite adhesive erythrocytic binding protein	Pf4000-5	-0.376039
144-V05C	BSPZV1-144	2 wks post final dose	675000	Not Protected	PF3D7_0802800.2o2_8482	PF3D7_0802800.2o2	PF3D7_0802800	serine/threonine protein phosphatase, putative	Pf4500-4	-0.0262367
144-V05C	BSPZV1-144	2 wks post final dose	675000	Not Protected	PF3D7_1463500.iso1.exon4.amp1_2088	PF3D7_1463500.iso1.exon4.amp1	PF3D7_1463500	conserved Plasmodium protein, unknown function	Pf4000-5	-0.155814
144-V05C	BSPZV1-144	2 wks post final dose	675000	Not Protected	PF3D7_1340800.iso1.exon2.amp1_2950	PF3D7_1340800.iso1.exon2.amp1	PF3D7_1340800	mitochondrial pyruvate carrier protein 1, putative	Pf4000-5	0.124359
144-V05C	BSPZV1-144	2 wks post final dose	675000	Not Protected	PF3D7_1141800.iso1.exon3.amp1_1809	PF3D7_1141800.iso1.exon3.amp1	PF3D7_1141800	phd finger protein, putative	Pf4000-5	0.187786
144-V05C	BSPZV1-144	2 wks post final dose	675000	Not Protected	PF3D7_0707600.1o1_5249	PF3D7_0707600.1o1	PF3D7_0707600	conserved Plasmodium protein, unknown function	Pf4500-4	0.0325628
144-V05C	BSPZV1-144	2 wks post final dose	675000	Not Protected	PF3D7_1000600.iso1.exon1.amp1_3892	PF3D7_1000600.iso1.exon1.amp1	PF3D7_1000600	rifin	Pf4000-5	0.0851435
144-V05C	BSPZV1-144	2 wks post final dose	675000	Not Protected	PF3D7_1139900.iso1.exon2.amp1_2663	PF3D7_1139900.iso1.exon2.amp1	PF3D7_1139900	conserved Plasmodium protein, unknown function	Pf4000-5	0.348178
144-V05C	BSPZV1-144	2 wks post final dose	675000	Not Protected	PF3D7_1252400.e3s1_6303	PF3D7_1252400.e3s1	PF3D7_1252400	reticulocyte binding protein homologue 3, pseudogene (RH3)	Pf4500-4	0.466819
144-V05C	BSPZV1-144	2 wks post final dose	675000	Not Protected	PF3D7_0713100.2o2_5537	PF3D7_0713100.2o2	PF3D7_0713100	Pfmc-2TM Maurer's cleft two transmembrane protein (MC-2TM)	Pf4500-4	0.731756
144-V05C	BSPZV1-144	2 wks post final dose	675000	Not Protected	PF3D7_0914400.iso1.exon6.amp1_3238	PF3D7_0914400.iso1.exon6.amp1	PF3D7_0914400	conserved Plasmodium protein, unknown function	Pf4000-5	0.684344
144-V05C	BSPZV1-144	2 wks post final dose	675000	Not Protected	PF3D7_1207000.e1s1_8051	PF3D7_1207000.e1s1	PF3D7_1207000	conserved Plasmodium protein, unknown function	Pf4500-4	0.0647751
144-V05C	BSPZV1-144	2 wks post final dose	675000	Not Protected	PF3D7_0729600.iso1.exon2.amp1_1490	PF3D7_0729600.iso1.exon2.amp1	PF3D7_0729600	conserved Plasmodium protein, unknown function	Pf4000-5	0.316096
144-V05C	BSPZV1-144	2 wks post final dose	675000	Not Protected	PF3D7_1126800.iso1.exon1.amp1_2184	PF3D7_1126800.iso1.exon1.amp1	PF3D7_1126800	conserved Plasmodium protein, unknown function	Pf4000-5	0.307483
144-V05C	BSPZV1-144	2 wks post final dose	675000	Not Protected	PF3D7_0310000.iso1.exon3.amp1_2927	PF3D7_0310000.iso1.exon3.amp1	PF3D7_0310000	conserved Plasmodium protein, unknown function	Pf4000-5	-0.63666
144-V05C	BSPZV1-144	2 wks post final dose	675000	Not Protected	PF3D7_1474900_4818	PF3D7_1474900	PF3D7_1474900	trailer hitch homolog, putative (CITH)	Pf4500-4	0.313778
144-V05C	BSPZV1-144	2 wks post final dose	675000	Not Protected	PF3D7_1136700.iso1.exon7.amp1_117	PF3D7_1136700.iso1.exon7.amp1	PF3D7_1136700	conserved Plasmodium protein, unknown function	Pf4000-5	0.38942
144-V05C	BSPZV1-144	2 wks post final dose	675000	Not Protected	PF3D7_0923300.1o1_6199	PF3D7_0923300.1o1	PF3D7_0923300	perforin like protein 3 (PPLP3)	Pf4500-4	0.0634855
144-V05C	BSPZV1-144	2 wks post final dose	675000	Not Protected	PF3D7_0917100.iso1.exon1.amp1_3046	PF3D7_0917100.iso1.exon1.amp1	PF3D7_0917100	N-glycosylase/DNA lyase, putative	Pf4000-5	0.137378
144-V05C	BSPZV1-144	2 wks post final dose	675000	Not Protected	PF3D7_0322500.iso1.exon1.amp1_3605	PF3D7_0322500.iso1.exon1.amp1	PF3D7_0322500	iron-sulfur cluster assembly accessory protein, putative	Pf4000-5	0.350509
144-V05C	BSPZV1-144	2 wks post final dose	675000	Not Protected	PF3D7_1124800.e3s1_6550	PF3D7_1124800.e3s1	PF3D7_1124800	nuclear preribosomal assembly protein, putative	Pf4500-4	0.108483
144-V05C	BSPZV1-144	2 wks post final dose	675000	Not Protected	PF3D7_1213900.iso1.exon2.amp2_4267	PF3D7_1213900.iso1.exon2.amp2	PF3D7_1213900	conserved Plasmodium protein, unknown function	Pf4000-5	0.17434
144-V05C	BSPZV1-144	2 wks post final dose	675000	Not Protected	PF3D7_0311100.iso1.exon2.amp1_1298	PF3D7_0311100.iso1.exon2.amp1	PF3D7_0311100	pre-mRNA splicing factor, putative	Pf4000-5	0.352526
144-V05C	BSPZV1-144	2 wks post final dose	675000	Not Protected	PF3D7_1347500.e1_8266	PF3D7_1347500.e1	PF3D7_1347500	DNA/RNA-binding protein Alba 4 (ALBA4)	Pf4500-4	-1.79546
144-V05C	BSPZV1-144	2 wks post final dose	675000	Not Protected	PF3D7_0929700.iso1.exon2.amp1_4459	PF3D7_0929700.iso1.exon2.amp1	PF3D7_0929700	conserved Plasmodium protein, unknown function	Pf4000-5	-0.238886
144-V05C	BSPZV1-144	2 wks post final dose	675000	Not Protected	PF3D7_0915400.e1s2_7221	PF3D7_0915400.e1s2	PF3D7_0915400	6-phosphofructokinase (PFK9)	Pf4500-4	0.20052
144-V05C	BSPZV1-144	2 wks post final dose	675000	Not Protected	PF3D7_0628200.s1_6574	PF3D7_0628200.s1	PF3D7_0628200	protein kinase PK4 (PK4)	Pf4500-4	0.741696
144-V05C	BSPZV1-144	2 wks post final dose	675000	Not Protected	PF3D7_0918800.1o1_7053	PF3D7_0918800.1o1	PF3D7_0918800	dihydrouridine synthase, putative	Pf4500-4	-0.0928654
144-V05C	BSPZV1-144	2 wks post final dose	675000	Not Protected	PF3D7_1122600.2o2_5848	PF3D7_1122600.2o2	PF3D7_1122600	conserved Plasmodium protein, unknown function	Pf4500-4	0.0854337
144-V05C	BSPZV1-144	2 wks post final dose	675000	Not Protected	PF3D7_1473000.1o1_8985	PF3D7_1473000.1o1	PF3D7_1473000	conserved Plasmodium protein, unknown function	Pf4500-4	2.06178
144-V05C	BSPZV1-144	2 wks post final dose	675000	Not Protected	PF3D7_1139300.e2s3_8649	PF3D7_1139300.e2s3	PF3D7_1139300	transcription factor with AP2 domain(s) (ApiAP2)	Pf4500-4	1.82494
144-V05C	BSPZV1-144	2 wks post final dose	675000	Not Protected	PF3D7_0407500.3o3_6135	PF3D7_0407500.3o3	PF3D7_0407500	mitochondrial carrier protein, putative	Pf4500-4	-0.0362739
144-V05C	BSPZV1-144	2 wks post final dose	675000	Not Protected	PF3D7_0733000.iso1.exon1.amp1_3621	PF3D7_0733000.iso1.exon1.amp1	PF3D7_0733000	erythrocyte membrane protein 1, PfEMP1	Pf4000-5	0.528091
144-V05C	BSPZV1-144	2 wks post final dose	675000	Not Protected	PF3D7_1415300.e1s1_6039	PF3D7_1415300.e1s1	PF3D7_1415300	RNA-binding protein Nova-1, putative	Pf4500-4	0.301172
144-V05C	BSPZV1-144	2 wks post final dose	675000	Not Protected	PF3D7_0313200_5401	PF3D7_0313200	PF3D7_0313200	conserved Plasmodium protein, unknown function	Pf4500-4	0.0101715
144-V05C	BSPZV1-144	2 wks post final dose	675000	Not Protected	PF3D7_1356400.iso1.exon1.amp2_3669	PF3D7_1356400.iso1.exon1.amp2	PF3D7_1356400	phosphatase 2A regulatory subunit-related protein, putative	Pf4000-5	0.542979
144-V05C	BSPZV1-144	2 wks post final dose	675000	Not Protected	PF3D7_1366700.iso1.exon1.amp1_3022	PF3D7_1366700.iso1.exon1.amp1	PF3D7_1366700	conserved Plasmodium protein, unknown function	Pf4000-5	0.898405
144-V05C	BSPZV1-144	2 wks post final dose	675000	Not Protected	PF3D7_0505000.iso1.exon1.amp2_4283	PF3D7_0505000.iso1.exon1.amp2	PF3D7_0505000	conserved Plasmodium membrane protein, unknown function	Pf4000-5	0.26906
144-V05C	BSPZV1-144	2 wks post final dose	675000	Not Protected	PF3D7_1017800.iso1.exon3.amp1_1681	PF3D7_1017800.iso1.exon3.amp1	PF3D7_1017800	conserved Plasmodium protein, unknown function	Pf4000-5	2.37773
144-V05C	BSPZV1-144	2 wks post final dose	675000	Not Protected	PF3D7_0301600.2o2_7359	PF3D7_0301600.2o2	PF3D7_0301600	Plasmodium exported protein (hyp1), unknown function (GEXP21)	Pf4500-4	-0.297059
144-V05C	BSPZV1-144	2 wks post final dose	675000	Not Protected	PF3D7_1320400.iso1.exon1.amp1_3310	PF3D7_1320400.iso1.exon1.amp1	PF3D7_1320400	type I signal peptidase	Pf4000-5	0.123451
144-V05C	BSPZV1-144	2 wks post final dose	675000	Not Protected	PF3D7_1327600.1o1_8410	PF3D7_1327600.1o1	PF3D7_1327600	nicotinic acid mononucleotide adenyltransferase	Pf4500-4	-0.211839
144-V05C	BSPZV1-144	2 wks post final dose	675000	Not Protected	PF3D7_1416400.iso1.exon13.amp1_2384	PF3D7_1416400.iso1.exon13.amp1	PF3D7_1416400	conserved Plasmodium protein, unknown function	Pf4000-5	0.311477
144-V05C	BSPZV1-144	2 wks post final dose	675000	Not Protected	PF3D7_0806400.1o1_5824	PF3D7_0806400.1o1	PF3D7_0806400	glycosyltransferase family 28 protein, putative	Pf4500-4	0.0843442
144-V05C	BSPZV1-144	2 wks post final dose	675000	Not Protected	PF3D7_1253400.1o1_7644	PF3D7_1253400.1o1	PF3D7_1253400	acyl-CoA synthetase (ACS3)	Pf4500-4	-0.161212
144-V05C	BSPZV1-144	2 wks post final dose	675000	Not Protected	PF3D7_0612700.1o1_6423	PF3D7_0612700.1o1	PF3D7_0612700	6-cysteine protein (P12)	Pf4500-4	0.171572
144-V05C	BSPZV1-144	2 wks post final dose	675000	Not Protected	PF3D7_1120100.e3_7404	PF3D7_1120100.e3	PF3D7_1120100	phosphoglycerate mutase, putative (PGM1)	Pf4500-4	-0.831338
144-V05C	BSPZV1-144	2 wks post final dose	675000	Not Protected	PF3D7_0918400.4o5_4778	PF3D7_0918400.4o5	PF3D7_0918400	conserved Plasmodium protein, unknown function	Pf4500-4	0.0157067
144-V05C	BSPZV1-144	2 wks post final dose	675000	Not Protected	PF3D7_0520100.e1s1_8338	PF3D7_0520100.e1s1	PF3D7_0520100	protein phosphatase, putative	Pf4500-4	1.73459
144-V05C	BSPZV1-144	2 wks post final dose	675000	Not Protected	PF3D7_1119100.iso1.exon4.amp1_1227	PF3D7_1119100.iso1.exon4.amp1	PF3D7_1119100	tRNA m(1)G methyltransferase, putative	Pf4000-5	0.123814
144-V05C	BSPZV1-144	2 wks post final dose	675000	Not Protected	PF3D7_0505100.iso1.exon1.amp2_3685	PF3D7_0505100.iso1.exon1.amp2	PF3D7_0505100	conserved Plasmodium protein, unknown function	Pf4000-5	0.510132
144-V05C	BSPZV1-144	2 wks post final dose	675000	Not Protected	PF3D7_0202900.iso1.exon7.amp1_3525	PF3D7_0202900.iso1.exon7.amp1	PF3D7_0202900	zinc finger protein, putative	Pf4000-5	0.158817
144-V05C	BSPZV1-144	2 wks post final dose	675000	Not Protected	PF3D7_0500100.iso1.exon1.amp1_2232	PF3D7_0500100.iso1.exon1.amp1	PF3D7_0500100	erythrocyte membrane protein 1, PfEMP1	Pf4000-5	0.418152
144-V05C	BSPZV1-144	2 wks post final dose	675000	Not Protected	PF3D7_1252600.1o1_7309	PF3D7_1252600.1o1	PF3D7_1252600	lysophospholipase, putative	Pf4500-4	-0.0635876
144-V05C	BSPZV1-144	2 wks post final dose	675000	Not Protected	PF3D7_0705300.iso1.exon1.amp1_1322	PF3D7_0705300.iso1.exon1.amp1	PF3D7_0705300	origin recognition complex subunit 2, putative	Pf4000-5	0.2797
144-V05C	BSPZV1-144	2 wks post final dose	675000	Not Protected	PF3D7_0817100.1o1_8506	PF3D7_0817100.1o1	PF3D7_0817100	GTPase, putative	Pf4500-4	-0.0965672
144-V05C	BSPZV1-144	2 wks post final dose	675000	Not Protected	PF3D7_1352000.iso1.exon1.amp2_532	PF3D7_1352000.iso1.exon1.amp2	PF3D7_1352000	conserved Plasmodium protein, unknown function	Pf4000-5	0.273653
144-V05C	BSPZV1-144	2 wks post final dose	675000	Not Protected	PF3D7_1225600.e4s1_5393	PF3D7_1225600.e4s1	PF3D7_1225600	conserved Plasmodium protein, unknown function	Pf4500-4	0.112407
144-V05C	BSPZV1-144	2 wks post final dose	675000	Not Protected	PF3D7_1434500.e2s1_5696	PF3D7_1434500.e2s1	PF3D7_1434500	dynein-related AAA-type ATPase, putative	Pf4500-4	0.306788
144-V05C	BSPZV1-144	2 wks post final dose	675000	Not Protected	PF3D7_1003800.e1s2_7780	PF3D7_1003800.e1s2	PF3D7_1003800	U5 small nuclear ribonuclear protein, putative	Pf4500-4	2.81271
144-V05C	BSPZV1-144	2 wks post final dose	675000	Not Protected	PF3D7_1135500.iso1.exon3.amp1_684	PF3D7_1135500.iso1.exon3.amp1	PF3D7_1135500	conserved Plasmodium protein, unknown function	Pf4000-5	-0.0279871
144-V05C	BSPZV1-144	2 wks post final dose	675000	Not Protected	PF3D7_1347100.iso1.exon1.amp1_1594	PF3D7_1347100.iso1.exon1.amp1	PF3D7_1347100	DNA topoisomerase III, putative	Pf4000-5	0.045024
144-V05C	BSPZV1-144	2 wks post final dose	675000	Not Protected	PF3D7_0933300.1o2_7388	PF3D7_0933300.1o2	PF3D7_0933300	conserved Plasmodium protein, unknown function	Pf4500-4	-0.0765266
144-V05C	BSPZV1-144	2 wks post final dose	675000	Not Protected	PF3D7_0632500.iso1.exon2.amp3_492	PF3D7_0632500.iso1.exon2.amp3	PF3D7_0632500	erythrocyte membrane protein 1, PfEMP1	Pf4000-5	0.421261
144-V05C	BSPZV1-144	2 wks post final dose	675000	Not Protected	PF3D7_1212000.e3s1_7987	PF3D7_1212000.e3s1	PF3D7_1212000	glutathione peroxidase (Trx-G1)	Pf4500-4	0.236111
144-V05C	BSPZV1-144	2 wks post final dose	675000	Not Protected	PF3D7_0804900.1o1_6159	PF3D7_0804900.1o1	PF3D7_0804900	GTPase activator, putative	Pf4500-4	1.94294
144-V05C	BSPZV1-144	2 wks post final dose	675000	Not Protected	PF3D7_1475000.1o1_7835	PF3D7_1475000.1o1	PF3D7_1475000	mediator complex subunit 31, putative	Pf4500-4	-0.313
144-V05C	BSPZV1-144	2 wks post final dose	675000	Not Protected	PF3D7_0628400.iso1.exon11.amp1_1801	PF3D7_0628400.iso1.exon11.amp1	PF3D7_0628400	conserved Plasmodium membrane protein, unknown function	Pf4000-5	0.43977
144-V05C	BSPZV1-144	2 wks post final dose	675000	Not Protected	PF3D7_0619800.iso1.exon2.amp1_53	PF3D7_0619800.iso1.exon2.amp1	PF3D7_0619800	conserved Plasmodium membrane protein, unknown function	Pf4000-5	-0.480999
144-V05C	BSPZV1-144	2 wks post final dose	675000	Not Protected	PF3D7_0631400.iso1.exon1.amp1_1562	PF3D7_0631400.iso1.exon1.amp1	PF3D7_0631400	Pfmc-2TM Maurer's cleft two transmembrane protein	Pf4000-5	0.475522
144-V05C	BSPZV1-144	2 wks post final dose	675000	Not Protected	PF3D7_0222500.iso1.exon2.amp1_987	PF3D7_0222500.iso1.exon2.amp1	PF3D7_0222500	rifin	Pf4000-5	0.656731
144-V05C	BSPZV1-144	2 wks post final dose	675000	Not Protected	PF3D7_1449600.iso1.exon1.amp1_436	PF3D7_1449600.iso1.exon1.amp1	PF3D7_1449600	conserved Plasmodium protein, unknown function	Pf4000-5	0.525893
144-V05C	BSPZV1-144	2 wks post final dose	675000	Not Protected	PF3D7_1345400.3o4_5656	PF3D7_1345400.3o4	PF3D7_1345400	conserved Plasmodium protein, unknown function	Pf4500-4	0.256729
144-V05C	BSPZV1-144	2 wks post final dose	675000	Not Protected	PF3D7_1212300.iso1.exon6.amp1_4196	PF3D7_1212300.iso1.exon6.amp1	PF3D7_1212300	conserved Plasmodium protein, unknown function	Pf4000-5	0.0361695
144-V05C	BSPZV1-144	2 wks post final dose	675000	Not Protected	PF3D7_1229600.iso1.exon2.amp1_804	PF3D7_1229600.iso1.exon2.amp1	PF3D7_1229600	conserved Plasmodium protein, unknown function	Pf4000-5	2.16037
144-V05C	BSPZV1-144	2 wks post final dose	675000	Not Protected	PF3D7_0323600.1o3_6183	PF3D7_0323600.1o3	PF3D7_0323600	conserved Plasmodium protein, unknown function	Pf4500-4	0.635241
144-V05C	BSPZV1-144	2 wks post final dose	675000	Not Protected	PF3D7_1435700.1.e3s1_9176	PF3D7_1435700.1.e3s1	PF3D7_1435700.1	conserved Plasmodium protein, unknown function	Pf4500-4	-0.0724707
144-V05C	BSPZV1-144	2 wks post final dose	675000	Not Protected	PF3D7_1470100.e1s1_6351	PF3D7_1470100.e1s1	PF3D7_1470100	conserved Plasmodium protein, unknown function	Pf4500-4	-0.160136
144-V05C	BSPZV1-144	2 wks post final dose	675000	Not Protected	PF3D7_1238000.2o2_4651	PF3D7_1238000.2o2	PF3D7_1238000	conserved Plasmodium membrane protein, unknown function	Pf4500-4	0.0717553
144-V05C	BSPZV1-144	2 wks post final dose	675000	Not Protected	PF3D7_1458200.iso1.exon2.amp1_1761	PF3D7_1458200.iso1.exon2.amp1	PF3D7_1458200	conserved Plasmodium protein, unknown function	Pf4000-5	0.249042
144-V05C	BSPZV1-144	2 wks post final dose	675000	Not Protected	PF3D7_1000100.iso1.exon2.amp1_3908	PF3D7_1000100.iso1.exon2.amp1	PF3D7_1000100	erythrocyte membrane protein 1, PfEMP1	Pf4000-5	1.11689
144-V05C	BSPZV1-144	2 wks post final dose	675000	Not Protected	PF3D7_1015200.iso3.exon3.amp1_4204	PF3D7_1015200.iso3.exon3.amp1	PF3D7_1015200	cysteine--tRNA ligase, putative	Pf4000-5	-0.0464744
144-V05C	BSPZV1-144	2 wks post final dose	675000	Not Protected	PF3D7_1321300.e1s1_7716	PF3D7_1321300.e1s1	PF3D7_1321300	conserved Plasmodium membrane protein, unknown function	Pf4500-4	-0.580924
144-V05C	BSPZV1-144	2 wks post final dose	675000	Not Protected	PF3D7_1227100.e1s1_4898	PF3D7_1227100.e1s1	PF3D7_1227100	DNA helicase 60 (DH60)	Pf4500-4	1.66555
144-V05C	BSPZV1-144	2 wks post final dose	675000	Not Protected	PF3D7_0504800.iso1.exon1.amp1_1378	PF3D7_0504800.iso1.exon1.amp1	PF3D7_0504800	conserved Plasmodium protein, unknown function	Pf4000-5	0.397108
144-V05C	BSPZV1-144	2 wks post final dose	675000	Not Protected	PF3D7_0817900.e1s1_5433	PF3D7_0817900.e1s1	PF3D7_0817900	high mobility group protein (HMGB2)	Pf4500-4	-0.0559596
144-V05C	BSPZV1-144	2 wks post final dose	675000	Not Protected	PF3D7_1134900.iso1.exon1.amp1_732	PF3D7_1134900.iso1.exon1.amp1	PF3D7_1134900	conserved Plasmodium protein, unknown function	Pf4000-5	2.36014
144-V05C	BSPZV1-144	2 wks post final dose	675000	Not Protected	PF3D7_1339800.iso1.exon1.amp1_4100	PF3D7_1339800.iso1.exon1.amp1	PF3D7_1339800	conserved Plasmodium protein, unknown function	Pf4000-5	0.0892436
144-V05C	BSPZV1-144	2 wks post final dose	675000	Not Protected	PF3D7_0519700.iso1.exon2.amp1_2400	PF3D7_0519700.iso1.exon2.amp1	PF3D7_0519700	conserved Plasmodium protein, unknown function	Pf4000-5	0.461931
144-V05C	BSPZV1-144	2 wks post final dose	675000	Not Protected	PF3D7_1355700.iso1.exon1.amp2_1346	PF3D7_1355700.iso1.exon1.amp2	PF3D7_1355700	protein phosphatase, putative	Pf4000-5	0.400412
144-V05C	BSPZV1-144	2 wks post final dose	675000	Not Protected	PF3D7_1240300.iso1.exon1.amp2_2520	PF3D7_1240300.iso1.exon1.amp2	PF3D7_1240300	erythrocyte membrane protein 1, PfEMP1	Pf4000-5	0.536579
144-V05C	BSPZV1-144	2 wks post final dose	675000	Not Protected	PF3D7_1358700.1o1_4946	PF3D7_1358700.1o1	PF3D7_1358700	conserved Plasmodium protein, unknown function	Pf4500-4	-0.0846729
144-V05C	BSPZV1-144	2 wks post final dose	675000	Not Protected	PF3D7_0526500.s2_8841	PF3D7_0526500.s2	PF3D7_0526500	conserved Plasmodium protein, unknown function	Pf4500-4	-0.0573617
144-V05C	BSPZV1-144	2 wks post final dose	675000	Not Protected	PF3D7_1032500.1o3_4962	PF3D7_1032500.1o3	PF3D7_1032500	DER1-like protein, putative (Der1-2)	Pf4500-4	-0.292098
144-V05C	BSPZV1-144	2 wks post final dose	675000	Not Protected	PF3D7_0703000.iso1.exon1.amp1_3438	PF3D7_0703000.iso1.exon1.amp1	PF3D7_0703000	conserved Plasmodium protein, unknown function	Pf4000-5	0.139176
144-V05C	BSPZV1-144	2 wks post final dose	675000	Not Protected	PF3D7_0800100.iso1.exon2.amp1_3980	PF3D7_0800100.iso1.exon2.amp1	PF3D7_0800100	erythrocyte membrane protein 1, PfEMP1	Pf4000-5	0.397409
144-V05C	BSPZV1-144	2 wks post final dose	675000	Not Protected	PF3D7_0515600.e10s1_6016	PF3D7_0515600.e10s1	PF3D7_0515600	conserved Plasmodium protein, unknown function	Pf4500-4	0.458293
144-V05C	BSPZV1-144	2 wks post final dose	675000	Not Protected	PF3D7_0803500.iso1.exon1.amp2_173	PF3D7_0803500.iso1.exon1.amp2	PF3D7_0803500	AAA family ATPase, putative	Pf4000-5	0.162714
144-V05C	BSPZV1-144	2 wks post final dose	675000	Not Protected	PF3D7_0812400.e1s1_6614	PF3D7_0812400.e1s1	PF3D7_0812400	karyopherin alpha (KARalpha)	Pf4500-4	0.387035
144-V05C	BSPZV1-144	2 wks post final dose	675000	Not Protected	PF3D7_0417400.iso1.exon1.amp4_seg2_2328	PF3D7_0417400.iso1.exon1.amp4_seg2	PF3D7_0417400	conserved Plasmodium protein, unknown function	Pf4000-5	1.24904
144-V05C	BSPZV1-144	2 wks post final dose	675000	Not Protected	PF3D7_1001700.2o2_9009	PF3D7_1001700.2o2	PF3D7_1001700	Plasmodium exported protein (PHISTc), unknown function	Pf4500-4	3.11579
144-V05C	BSPZV1-144	2 wks post final dose	675000	Not Protected	PF3D7_0510300.iso1.exon1.amp1_2416	PF3D7_0510300.iso1.exon1.amp1	PF3D7_0510300	conserved Plasmodium protein, unknown function	Pf4000-5	-0.793219
144-V05C	BSPZV1-144	2 wks post final dose	675000	Not Protected	PF3D7_1446800.e2s1_9184	PF3D7_1446800.e2s1	PF3D7_1446800	heme detoxification protein (HDP)	Pf4500-4	-0.0227108
144-V05C	BSPZV1-144	2 wks post final dose	675000	Not Protected	PF3D7_1469600.e1s2_5417	PF3D7_1469600.e1s2	PF3D7_1469600	biotin carboxylase subunit of acetyl CoA carboxylase, putative (ACC1)	Pf4500-4	1.12571
144-V05C	BSPZV1-144	2 wks post final dose	675000	Not Protected	PF3D7_1208900.s1_5377	PF3D7_1208900.s1	PF3D7_1208900	conserved Plasmodium protein, unknown function	Pf4500-4	1.23103
144-V05C	BSPZV1-144	2 wks post final dose	675000	Not Protected	PF3D7_1219000.iso1.exon1.amp1_seg1_4603	PF3D7_1219000.iso1.exon1.amp1_seg1	PF3D7_1219000	formin 2	Pf4000-5	1.37147
144-V05C	BSPZV1-144	2 wks post final dose	675000	Not Protected	PF3D7_1125600.iso1.exon1.amp1_317	PF3D7_1125600.iso1.exon1.amp1	PF3D7_1125600	conserved Plasmodium protein, unknown function	Pf4000-5	0.00770076
144-V05C	BSPZV1-144	2 wks post final dose	675000	Not Protected	PF3D7_0926300.iso1.exon3.amp1_2687	PF3D7_0926300.iso1.exon3.amp1	PF3D7_0926300	protein kinase, putative	Pf4000-5	0.939658
144-V05C	BSPZV1-144	2 wks post final dose	675000	Not Protected	PF3D7_0305200.iso1.exon1.amp1_3725	PF3D7_0305200.iso1.exon1.amp1	PF3D7_0305200	conserved Plasmodium protein, unknown function	Pf4000-5	0.454871
144-V05C	BSPZV1-144	2 wks post final dose	675000	Not Protected	PF3D7_1111000.1o1_6758	PF3D7_1111000.1o1	PF3D7_1111000	tRNA m5C-methyltransferase, putative	Pf4500-4	0.364174
144-V05C	BSPZV1-144	2 wks post final dose	675000	Not Protected	PF3D7_1446600.e3s1_7165	PF3D7_1446600.e3s1	PF3D7_1446600	centrin-2 (CEN2)	Pf4500-4	0.20253
144-V05C	BSPZV1-144	2 wks post final dose	675000	Not Protected	PF3D7_0802600.iso1.exon3.amp2_1945	PF3D7_0802600.iso1.exon3.amp2	PF3D7_0802600	adenylyl cyclase beta	Pf4000-5	0.342568
144-V05C	BSPZV1-144	2 wks post final dose	675000	Not Protected	PF3D7_0315700.1o2_6207	PF3D7_0315700.1o2	PF3D7_0315700	conserved Plasmodium membrane protein, unknown function	Pf4500-4	0.0212208
144-V05C	BSPZV1-144	2 wks post final dose	675000	Not Protected	PF3D7_0219400.iso1.exon2.amp1_1777	PF3D7_0219400.iso1.exon2.amp1	PF3D7_0219400	ribosome associated membrane protein RAMP4, putative	Pf4000-5	0.252038
144-V05C	BSPZV1-144	2 wks post final dose	675000	Not Protected	PF3D7_0902900.1o1_8123	PF3D7_0902900.1o1	PF3D7_0902900	conserved Plasmodium protein, unknown function	Pf4500-4	0.312073
144-V05C	BSPZV1-144	2 wks post final dose	675000	Not Protected	PF3D7_0602900.iso1.exon2.amp1_1873	PF3D7_0602900.iso1.exon2.amp1	PF3D7_0602900	conserved Plasmodium protein, unknown function	Pf4000-5	-0.259357
144-V05C	BSPZV1-144	2 wks post final dose	675000	Not Protected	PF3D7_0518700.e5s1_8825	PF3D7_0518700.e5s1	PF3D7_0518700	mRNA-binding protein PUF1 (PUF1)	Pf4500-4	-0.283165
144-V05C	BSPZV1-144	2 wks post final dose	675000	Not Protected	PF3D7_0920900.iso1.exon1.amp1_2703	PF3D7_0920900.iso1.exon1.amp1	PF3D7_0920900	U4/U6 snRNA-associated-splicing factor, putative	Pf4000-5	0.059915
144-V05C	BSPZV1-144	2 wks post final dose	675000	Not Protected	PF3D7_0813200.1o4_7572	PF3D7_0813200.1o4	PF3D7_0813200	CS domain protein, putative	Pf4500-4	0.0926761
144-V05C	BSPZV1-144	2 wks post final dose	675000	Not Protected	PF3D7_1146300.1o1_6399	PF3D7_1146300.1o1	PF3D7_1146300	conserved Plasmodium protein, unknown function	Pf4500-4	0.000770272
144-V05C	BSPZV1-144	2 wks post final dose	675000	Not Protected	PF3D7_1138400.e1s3_5106	PF3D7_1138400.e1s3	PF3D7_1138400	guanylyl cyclase (GCalpha)	Pf4500-4	0.451408
144-V05C	BSPZV1-144	2 wks post final dose	675000	Not Protected	PF3D7_0525300.1o1_6447	PF3D7_0525300.1o1	PF3D7_0525300	conserved Plasmodium protein, unknown function	Pf4500-4	0.852505
144-V05C	BSPZV1-144	2 wks post final dose	675000	Not Protected	PF3D7_1023100.e1s2_6814	PF3D7_1023100.e1s2	PF3D7_1023100	dynein heavy chain, putative	Pf4500-4	-0.123379
144-V05C	BSPZV1-144	2 wks post final dose	675000	Not Protected	PF3D7_1410800.iso1.exon3.amp1_2049	PF3D7_1410800.iso1.exon3.amp1	PF3D7_1410800	ankyrin-repeat protein, putative	Pf4000-5	0.163421
144-V05C	BSPZV1-144	2 wks post final dose	675000	Not Protected	PF3D7_0530900.iso1.exon1.amp2_1107	PF3D7_0530900.iso1.exon1.amp2	PF3D7_0530900	formin 1	Pf4000-5	1.11671
144-V05C	BSPZV1-144	2 wks post final dose	675000	Not Protected	PF3D7_0903600.1.4o15_8514	PF3D7_0903600.1.4o15	PF3D7_0903600.1	conserved Plasmodium protein, unknown function	Pf4500-4	-0.0539589
144-V05C	BSPZV1-144	2 wks post final dose	675000	Not Protected	PF3D7_0314700.iso1.exon1.amp1_2568	PF3D7_0314700.iso1.exon1.amp1	PF3D7_0314700	zinc finger protein, putative	Pf4000-5	0.182388
144-V05C	BSPZV1-144	2 wks post final dose	675000	Not Protected	PF3D7_1359300.iso1.exon1.amp2_3957	PF3D7_1359300.iso1.exon1.amp2	PF3D7_1359300	mitotic control protein dis3 homologue, putative	Pf4000-5	0.591744
144-V05C	BSPZV1-144	2 wks post final dose	675000	Not Protected	PF3D7_1040500.iso1.exon2.amp1_2735	PF3D7_1040500.iso1.exon2.amp1	PF3D7_1040500	rifin	Pf4000-5	0.892552
144-V05C	BSPZV1-144	2 wks post final dose	675000	Not Protected	PF3D7_0201800.iso1.exon1.amp1_4451	PF3D7_0201800.iso1.exon1.amp1	PF3D7_0201800	RESA-like protein with PHIST and DnaJ domains	Pf4000-5	0.456459
144-V05C	BSPZV1-144	2 wks post final dose	675000	Not Protected	PF3D7_0909000.iso1.exon5.amp1_1027	PF3D7_0909000.iso1.exon5.amp1	PF3D7_0909000	conserved Plasmodium protein, unknown function	Pf4000-5	0.181515
144-V05C	BSPZV1-144	2 wks post final dose	675000	Not Protected	PF3D7_1428700.1o1_5856	PF3D7_1428700.1o1	PF3D7_1428700	conserved protein, unknown function	Pf4500-4	0.217183
144-V05C	BSPZV1-144	2 wks post final dose	675000	Not Protected	PF3D7_0709900.e2_7429	PF3D7_0709900.e2	PF3D7_0709900	conserved Plasmodium membrane protein, unknown function	Pf4500-4	-0.0341031
144-V05C	BSPZV1-144	2 wks post final dose	675000	Not Protected	PF3D7_1117900.iso1.exon2.amp1_4411	PF3D7_1117900.iso1.exon2.amp1	PF3D7_1117900	conserved Plasmodium protein, unknown function	Pf4000-5	0.00986535
144-V05C	BSPZV1-144	2 wks post final dose	675000	Not Protected	PF3D7_0912800.1o1_8778	PF3D7_0912800.1o1	PF3D7_0912800	tRNA 1-methyladenosine methyltransferase subunit, putative	Pf4500-4	0.875047
144-V05C	BSPZV1-144	2 wks post final dose	675000	Not Protected	PF3D7_0400400.iso1.exon2.amp1_3672	PF3D7_0400400.iso1.exon2.amp1	PF3D7_0400400	erythrocyte membrane protein 1, PfEMP1	Pf4000-5	0.034624
144-V05C	BSPZV1-144	2 wks post final dose	675000	Not Protected	PF3D7_0703900.iso1.exon1.amp4_2544	PF3D7_0703900.iso1.exon1.amp4	PF3D7_0703900	conserved Plasmodium membrane protein, unknown function	Pf4000-5	0.858015
144-V05C	BSPZV1-144	2 wks post final dose	675000	Not Protected	PF3D7_1015900.e2s1_5752	PF3D7_1015900.e2s1	PF3D7_1015900	enolase (ENO)	Pf4500-4	0.733611
144-V05C	BSPZV1-144	2 wks post final dose	675000	Not Protected	PF3D7_0419900.iso1.exon3.amp1_2826	PF3D7_0419900.iso1.exon3.amp1	PF3D7_0419900	phosphatidylinositol 4-kinase, putative	Pf4000-5	0.0336573
144-V05C	BSPZV1-144	2 wks post final dose	675000	Not Protected	PF3D7_0205300.iso1.exon5.amp1_4084	PF3D7_0205300.iso1.exon5.amp1	PF3D7_0205300	conserved Plasmodium protein, unknown function	Pf4000-5	0.122723
144-V05C	BSPZV1-144	2 wks post final dose	675000	Not Protected	PF3D7_0611800.iso1.exon5.amp3_508	PF3D7_0611800.iso1.exon5.amp3	PF3D7_0611800	conserved Plasmodium protein, unknown function	Pf4000-5	0.804609
144-V05C	BSPZV1-144	2 wks post final dose	675000	Not Protected	PF3D7_0320400.e1s3_6638	PF3D7_0320400.e1s3	PF3D7_0320400	oocyst capsule protein (Cap380)	Pf4500-4	0.878927
144-V05C	BSPZV1-144	2 wks post final dose	675000	Not Protected	PF3D7_0805500.iso1.exon1.amp2_seg2_4044	PF3D7_0805500.iso1.exon1.amp2_seg2	PF3D7_0805500	conserved Plasmodium protein, unknown function	Pf4000-5	-0.00436214
144-V05C	BSPZV1-144	2 wks post final dose	675000	Not Protected	PF3D7_0315800.1o1_8171	PF3D7_0315800.1o1	PF3D7_0315800	zinc finger protein, putative	Pf4500-4	0.0136096
144-V05C	BSPZV1-144	2 wks post final dose	675000	Not Protected	PF3D7_1022200.e2s1_5154	PF3D7_1022200.e2s1	PF3D7_1022200	conserved Plasmodium membrane protein, unknown function	Pf4500-4	0.0551682
144-V05C	BSPZV1-144	2 wks post final dose	675000	Not Protected	PF3D7_1477900.e1_7692	PF3D7_1477900.e1	PF3D7_1477900	acyl-CoA synthetase, pseudogene (ACS1b)	Pf4500-4	-0.227086
144-V05C	BSPZV1-144	2 wks post final dose	675000	Not Protected	PF3D7_0415300.iso1.exon1.amp2_3693	PF3D7_0415300.iso1.exon1.amp2	PF3D7_0415300	cdc2-related protein kinase 3	Pf4000-5	0.540667
144-V05C	BSPZV1-144	2 wks post final dose	675000	Not Protected	PF3D7_0109900.1.1o20_5920	PF3D7_0109900.1.1o20	PF3D7_0109900.1	phosphatidate cytidylyltransferase, putative	Pf4500-4	0.480273
144-V05C	BSPZV1-144	2 wks post final dose	675000	Not Protected	PF3D7_1434500.e2s5_6854	PF3D7_1434500.e2s5	PF3D7_1434500	dynein-related AAA-type ATPase, putative	Pf4500-4	0.10114
144-V05C	BSPZV1-144	2 wks post final dose	675000	Not Protected	PF3D7_0104600.e1s1_7213	PF3D7_0104600.e1s1	PF3D7_0104600	conserved Plasmodium protein, unknown function	Pf4500-4	-0.0463815
144-V05C	BSPZV1-144	2 wks post final dose	675000	Not Protected	PF3D7_0831700.2o2_5026	PF3D7_0831700.2o2	PF3D7_0831700	heat shock protein 70, putative (HSP70-x)	Pf4500-4	2.81788
144-V05C	BSPZV1-144	2 wks post final dose	675000	Not Protected	PF3D7_0514900.1o1_8458	PF3D7_0514900.1o1	PF3D7_0514900	conserved Plasmodium protein, unknown function	Pf4500-4	0.00557446
144-V05C	BSPZV1-144	2 wks post final dose	675000	Not Protected	PF3D7_0208900.e1s1_7373	PF3D7_0208900.e1s1	PF3D7_0208900	6-cysteine protein (P230p)	Pf4500-4	-0.718658
144-V05C	BSPZV1-144	2 wks post final dose	675000	Not Protected	PF3D7_0502500.1o1_7620	PF3D7_0502500.1o1	PF3D7_0502500	conserved Plasmodium protein, unknown function	Pf4500-4	0.668216
144-V05C	BSPZV1-144	2 wks post final dose	675000	Not Protected	PF3D7_0202600.iso2.exon1.amp2_2807	PF3D7_0202600.iso2.exon1.amp2	PF3D7_0202600	conserved Plasmodium protein, unknown function	Pf4000-5	0.172057
144-V05C	BSPZV1-144	2 wks post final dose	675000	Not Protected	PF3D7_0615200.iso1.exon2.amp1_3813	PF3D7_0615200.iso1.exon2.amp1	PF3D7_0615200	conserved Plasmodium protein, unknown function	Pf4000-5	0.119447
144-V05C	BSPZV1-144	2 wks post final dose	675000	Not Protected	PF3D7_0405000.iso1.exon1.amp1_652	PF3D7_0405000.iso1.exon1.amp1	PF3D7_0405000	ATP-dependent RNA helicase, putative	Pf4000-5	0.109938
144-V05C	BSPZV1-144	2 wks post final dose	675000	Not Protected	PF3D7_1209000.iso1.exon2.amp1_2376	PF3D7_1209000.iso1.exon2.amp1	PF3D7_1209000	conserved Plasmodium protein, unknown function	Pf4000-5	0.472672
144-V05C	BSPZV1-144	2 wks post final dose	675000	Not Protected	PF3D7_1244100.e4s1_6255	PF3D7_1244100.e4s1	PF3D7_1244100	conserved Plasmodium protein, unknown function	Pf4500-4	-0.244777
144-V05C	BSPZV1-144	2 wks post final dose	675000	Not Protected	PF3D7_1142000.1o1_5034	PF3D7_1142000.1o1	PF3D7_1142000	conserved Plasmodium protein, unknown function	Pf4500-4	-0.325013
144-V05C	BSPZV1-144	2 wks post final dose	675000	Not Protected	PF3D7_0108600.iso1.exon6.amp1_940	PF3D7_0108600.iso1.exon6.amp1	PF3D7_0108600	conserved Plasmodium protein, unknown function	Pf4000-5	-1.07957
144-V05C	BSPZV1-144	2 wks post final dose	675000	Not Protected	PF3D7_0823300.e4s1_6543	PF3D7_0823300.e4s1	PF3D7_0823300	histone acetyltransferase GCN5 (GCN5)	Pf4500-4	0.336377
144-V05C	BSPZV1-144	2 wks post final dose	675000	Not Protected	PF3D7_1013500.e1s1_4795	PF3D7_1013500.e1s1	PF3D7_1013500	phosphoinositide-specific phospholipase C (PI-PLC)	Pf4500-4	0.719294
144-V05C	BSPZV1-144	2 wks post final dose	675000	Not Protected	PF3D7_1217200.e1s2_6910	PF3D7_1217200.e1s2	PF3D7_1217200	snoRNA-associated small subunit rRNA processing protein, putative	Pf4500-4	0.20186
144-V05C	BSPZV1-144	2 wks post final dose	675000	Not Protected	PF3D7_1236800.1o3_9057	PF3D7_1236800.1o3	PF3D7_1236800	protein-S-isoprenylcysteine O-methyltransferase, putative	Pf4500-4	-0.188826
144-V05C	BSPZV1-144	2 wks post final dose	675000	Not Protected	PF3D7_1235600.e3s1_7197	PF3D7_1235600.e3s1	PF3D7_1235600	serine hydroxymethyltransferase (SHMT)	Pf4500-4	0.137836
144-V05C	BSPZV1-144	2 wks post final dose	675000	Not Protected	PF3D7_0919900.iso1.exon1.amp4_1035	PF3D7_0919900.iso1.exon1.amp4	PF3D7_0919900	regulator of chromosome condensation, putative	Pf4000-5	0.803248
144-V05C	BSPZV1-144	2 wks post final dose	675000	Not Protected	PF3D7_0108700.e1s2_8059	PF3D7_0108700.e1s2	PF3D7_0108700	secreted ookinete protein, putative (PSOP24)	Pf4500-4	0.0426949
144-V05C	BSPZV1-144	2 wks post final dose	675000	Not Protected	PF3D7_1452700.iso1.exon8.amp1_676	PF3D7_1452700.iso1.exon8.amp1	PF3D7_1452700	U1 snRNA associated protein, putative	Pf4000-5	0.264947
144-V05C	BSPZV1-144	2 wks post final dose	675000	Not Protected	PF3D7_1471600.iso1.exon1.amp2_2504	PF3D7_1471600.iso1.exon1.amp2	PF3D7_1471600	conserved Plasmodium protein, unknown function	Pf4000-5	0.483049
144-V05C	BSPZV1-144	2 wks post final dose	675000	Not Protected	PF3D7_0715200.e1s1_8650	PF3D7_0715200.e1s1	PF3D7_0715200	conserved Plasmodium protein, unknown function	Pf4500-4	-0.465269
144-V05C	BSPZV1-144	2 wks post final dose	675000	Not Protected	PF3D7_0933600.e1s1_8054	PF3D7_0933600.e1s1	PF3D7_0933600	organelle processing peptidase, putative	Pf4500-4	0.185018
144-V05C	BSPZV1-144	2 wks post final dose	675000	Not Protected	PF3D7_0825200.iso1.exon1.amp1_2065	PF3D7_0825200.iso1.exon1.amp1	PF3D7_0825200	translation initiation factor IF-3, putative	Pf4000-5	1.93832
144-V05C	BSPZV1-144	2 wks post final dose	675000	Not Protected	PF3D7_0911900.e2_7125	PF3D7_0911900.e2	PF3D7_0911900	falstatin (ICP)	Pf4500-4	0.958186
144-V05C	BSPZV1-144	2 wks post final dose	675000	Not Protected	PFC10_API0018.iso1.exon1.amp1_2911	PFC10_API0018.iso1.exon1.amp1	PFC10_API0018	apicoplast ribosomal protein S2 (rps2)	Pf4000-5	-0.0477017
144-V05C	BSPZV1-144	2 wks post final dose	675000	Not Protected	PF3D7_1318100.1o1_8698	PF3D7_1318100.1o1	PF3D7_1318100	ferredoxin, putative	Pf4500-4	-0.0329204
144-V05C	BSPZV1-144	2 wks post final dose	675000	Not Protected	PF3D7_0832600.2o2_8434	PF3D7_0832600.2o2	PF3D7_0832600	stevor	Pf4500-4	0.231361
144-V05C	BSPZV1-144	2 wks post final dose	675000	Not Protected	PF3D7_0621700.iso1.exon1.amp2_1658	PF3D7_0621700.iso1.exon1.amp2	PF3D7_0621700	conserved Plasmodium protein, unknown function	Pf4000-5	0.132148
144-V05C	BSPZV1-144	2 wks post final dose	675000	Not Protected	PF3D7_1122200.iso1.exon4.amp1_1538	PF3D7_1122200.iso1.exon4.amp1	PF3D7_1122200	conserved Plasmodium protein, unknown function	Pf4000-5	0.10295
144-V05C	BSPZV1-144	2 wks post final dose	675000	Not Protected	PF3D7_0630300.iso1.exon4.amp1_2959	PF3D7_0630300.iso1.exon4.amp1	PF3D7_0630300	DNA polymerase epsilon, catalytic subunit a, putative	Pf4000-5	-0.0432067
144-V05C	BSPZV1-144	2 wks post final dose	675000	Not Protected	PF3D7_0729800.iso1.exon1.amp1_365	PF3D7_0729800.iso1.exon1.amp1	PF3D7_0729800	dynein light chain, putative	Pf4000-5	0.251373
144-V05C	BSPZV1-144	2 wks post final dose	675000	Not Protected	PF3D7_0815400.e1s1_8889	PF3D7_0815400.e1s1	PF3D7_0815400	conserved Plasmodium protein, unknown function	Pf4500-4	-0.107315
144-V05C	BSPZV1-144	2 wks post final dose	675000	Not Protected	PF3D7_0408700.e6s1_5713	PF3D7_0408700.e6s1	PF3D7_0408700	perforin like protein 1 (SPECT2)	Pf4500-4	0.474186
144-V05C	BSPZV1-144	2 wks post final dose	675000	Not Protected	PF3D7_1127300.1o1_7293	PF3D7_1127300.1o1	PF3D7_1127300	methyltransferase, putative	Pf4500-4	0.288929
144-V05C	BSPZV1-144	2 wks post final dose	675000	Not Protected	PF3D7_1456400.iso1.exon2.amp1_2696	PF3D7_1456400.iso1.exon2.amp1	PF3D7_1456400	conserved Plasmodium protein, unknown function	Pf4000-5	1.05297
144-V05C	BSPZV1-144	2 wks post final dose	675000	Not Protected	PF3D7_1317200.iso1.exon1.amp3_3366	PF3D7_1317200.iso1.exon1.amp3	PF3D7_1317200	transcription factor with AP2 domain(s)	Pf4000-5	0.445161
144-V05C	BSPZV1-144	2 wks post final dose	675000	Not Protected	PF3D7_1332200.e3s1_5971	PF3D7_1332200.e3s1	PF3D7_1332200	conserved Plasmodium protein, unknown function	Pf4500-4	0.157482
144-V05C	BSPZV1-144	2 wks post final dose	675000	Not Protected	PF3D7_1307700.iso1.exon1.amp1_4587	PF3D7_1307700.iso1.exon1.amp1	PF3D7_1307700	conserved Plasmodium protein, unknown function	Pf4000-5	-0.0326374
144-V05C	BSPZV1-144	2 wks post final dose	675000	Not Protected	PF3D7_0629700.s3 (renamed)_7149	PF3D7_0629700.s3 (renamed)	PF3D7_0629700	SET domain protein, putative (SET1)	Pf4500-4	0.265408
144-V05C	BSPZV1-144	2 wks post final dose	675000	Not Protected	PF3D7_1414200.1o1_7022	PF3D7_1414200.1o1	PF3D7_1414200	conserved Plasmodium protein, unknown function	Pf4500-4	-0.381596
144-V05C	BSPZV1-144	2 wks post final dose	675000	Not Protected	PF3D7_0408900.iso2.exon3.amp1_1554	PF3D7_0408900.iso2.exon3.amp1	PF3D7_0408900	peptidase, M22 family, putative	Pf4000-5	-0.222623
144-V05C	BSPZV1-144	2 wks post final dose	675000	Not Protected	PF3D7_0200700.iso1.exon1.amp1_700	PF3D7_0200700.iso1.exon1.amp1	PF3D7_0200700	rifin	Pf4000-5	0.478935
144-V05C	BSPZV1-144	2 wks post final dose	675000	Not Protected	PF3D7_0726100.2o2_6782	PF3D7_0726100.2o2	PF3D7_0726100	Plasmodium exported protein, unknown function	Pf4500-4	0.581299
144-V05C	BSPZV1-144	2 wks post final dose	675000	Not Protected	PF3D7_0631100.iso1.exon2.amp1_1011	PF3D7_0631100.iso1.exon2.amp1	PF3D7_0631100	Plasmodium exported protein (PHISTb), unknown function	Pf4000-5	0.655474
144-V05C	BSPZV1-144	2 wks post final dose	675000	Not Protected	PF3D7_1021900.e1s1_5761	PF3D7_1021900.e1s1	PF3D7_1021900	conserved Plasmodium protein (10b antigen), unknown function	Pf4500-4	-0.172238
144-V05C	BSPZV1-144	2 wks post final dose	675000	Not Protected	PF3D7_0513800.1o1_7549	PF3D7_0513800.1o1	PF3D7_0513800	Rab GTPase 1a (RAB1a)	Pf4500-4	-0.0822242
144-V05C	BSPZV1-144	2 wks post final dose	675000	Not Protected	PF3D7_1465000.1o1_4675	PF3D7_1465000.1o1	PF3D7_1465000	conserved Plasmodium protein, unknown function	Pf4500-4	1.52258
144-V05C	BSPZV1-144	2 wks post final dose	675000	Not Protected	PF3D7_0829500.e1_7118	PF3D7_0829500.e1	PF3D7_0829500	conserved Plasmodium protein, unknown function	Pf4500-4	-0.0936872
144-V05C	BSPZV1-144	2 wks post final dose	675000	Not Protected	PF3D7_1110500.iso1.exon2.amp2_1905	PF3D7_1110500.iso1.exon2.amp2	PF3D7_1110500	vacuolar sorting protein 35, putative	Pf4000-5	0.137738
144-V05C	BSPZV1-144	2 wks post final dose	675000	Not Protected	PF3D7_1246500.1o1_5896	PF3D7_1246500.1o1	PF3D7_1246500	conserved Plasmodium protein, unknown function	Pf4500-4	-0.730752
144-V05C	BSPZV1-144	2 wks post final dose	675000	Not Protected	PF3D7_0830300.1o1_7884	PF3D7_0830300.1o1	PF3D7_0830300	conserved Plasmodium protein, unknown function	Pf4500-4	-0.00908015
144-V05C	BSPZV1-144	2 wks post final dose	675000	Not Protected	PF3D7_0401600.iso1.exon1.amp1_3023	PF3D7_0401600.iso1.exon1.amp1	PF3D7_0401600	rifin	Pf4000-5	0.329708
144-V05C	BSPZV1-144	2 wks post final dose	675000	Not Protected	PF3D7_1037900.iso1.exon1.amp1_2057	PF3D7_1037900.iso1.exon1.amp1	PF3D7_1037900	conserved Plasmodium protein, unknown function	Pf4000-5	-0.429696
144-V05C	BSPZV1-144	2 wks post final dose	675000	Not Protected	PF3D7_0902000.2o3_6474	PF3D7_0902000.2o3	PF3D7_0902000	serine/threonine protein kinase, FIKK family (FIKK9.1)	Pf4500-4	0.0291696
144-V05C	BSPZV1-144	2 wks post final dose	675000	Not Protected	PF3D7_1321900.1o1_6998	PF3D7_1321900.1o1	PF3D7_1321900	conserved Plasmodium protein, unknown function	Pf4500-4	0.456891
144-V05C	BSPZV1-144	2 wks post final dose	675000	Not Protected	PF3D7_1244100.e1s2_5465	PF3D7_1244100.e1s2	PF3D7_1244100	conserved Plasmodium protein, unknown function	Pf4500-4	0.0113184
144-V05C	BSPZV1-144	2 wks post final dose	675000	Not Protected	PF3D7_0411900.iso1.exon1.amp1_724	PF3D7_0411900.iso1.exon1.amp1	PF3D7_0411900	DNA polymerase alpha	Pf4000-5	0.211918
144-V05C	BSPZV1-144	2 wks post final dose	675000	Not Protected	PF3D7_0207300.iso1.exon2.amp1_4172	PF3D7_0207300.iso1.exon2.amp1	PF3D7_0207300	serine repeat antigen 8	Pf4000-5	0.353456
144-V05C	BSPZV1-144	2 wks post final dose	675000	Not Protected	PF3D7_1108100.iso1.exon1.amp1_2831	PF3D7_1108100.iso1.exon1.amp1	PF3D7_1108100	conserved Plasmodium protein, unknown function	Pf4000-5	0.282633
144-V05C	BSPZV1-144	2 wks post final dose	675000	Not Protected	PF3D7_0515500.1o4_5058	PF3D7_0515500.1o4	PF3D7_0515500	amino acid transporter, putative	Pf4500-4	-0.00366375
144-V05C	BSPZV1-144	2 wks post final dose	675000	Not Protected	PF3D7_0505100.iso1.exon1.amp1_1083	PF3D7_0505100.iso1.exon1.amp1	PF3D7_0505100	conserved Plasmodium protein, unknown function	Pf4000-5	0.562281
144-V05C	BSPZV1-144	2 wks post final dose	675000	Not Protected	PF3D7_0808100.iso1.exon3.amp2_4252	PF3D7_0808100.iso1.exon3.amp2	PF3D7_0808100	conserved Plasmodium protein, unknown function	Pf4000-5	0.147065
144-V05C	BSPZV1-144	2 wks post final dose	675000	Not Protected	PF3D7_1405600.1o1_6718	PF3D7_1405600.1o1	PF3D7_1405600	ribonucleotide reductase small subunit (RNR)	Pf4500-4	0.560555
144-V05C	BSPZV1-144	2 wks post final dose	675000	Not Protected	PF3D7_0629600.iso1.exon2.amp1_3286	PF3D7_0629600.iso1.exon2.amp1	PF3D7_0629600	conserved Plasmodium protein, unknown function	Pf4000-5	0.16059
144-V05C	BSPZV1-144	2 wks post final dose	675000	Not Protected	PF3D7_0324400.iso1.exon2.amp1_1578	PF3D7_0324400.iso1.exon2.amp1	PF3D7_0324400	rifin (3D7-rifT3-5)	Pf4000-5	0.562683
144-V05C	BSPZV1-144	2 wks post final dose	675000	Not Protected	PF3D7_0904900.e1s3_6567	PF3D7_0904900.e1s3	PF3D7_0904900	Cu2 -transporting ATPase, putative (CUP)	Pf4500-4	0.112407
144-V05C	BSPZV1-144	2 wks post final dose	675000	Not Protected	PF3D7_1036600.iso1.exon2.amp1_1514	PF3D7_1036600.iso1.exon2.amp1	PF3D7_1036600	conserved Plasmodium protein, unknown function	Pf4000-5	0.186047
144-V05C	BSPZV1-144	2 wks post final dose	675000	Not Protected	PF3D7_1363100.1o2_7956	PF3D7_1363100.1o2	PF3D7_1363100	conserved Plasmodium protein, unknown function	Pf4500-4	0.0614568
144-V05C	BSPZV1-144	2 wks post final dose	675000	Not Protected	PF3D7_0425800.iso1.exon1.amp2_4244	PF3D7_0425800.iso1.exon1.amp2	PF3D7_0425800	erythrocyte membrane protein 1, PfEMP1	Pf4000-5	-0.411676
144-V05C	BSPZV1-144	2 wks post final dose	675000	Not Protected	PF3D7_1249500.iso1.exon5.amp1_4388	PF3D7_1249500.iso1.exon5.amp1	PF3D7_1249500	cutA, putative	Pf4000-5	0.231274
144-V05C	BSPZV1-144	2 wks post final dose	675000	Not Protected	PF3D7_0323800.e2s1_7381	PF3D7_0323800.e2s1	PF3D7_0323800	conserved Plasmodium protein, unknown function	Pf4500-4	1.05859
144-V05C	BSPZV1-144	2 wks post final dose	675000	Not Protected	PF3D7_0400400.iso1.exon2.amp4_4539	PF3D7_0400400.iso1.exon2.amp4	PF3D7_0400400	erythrocyte membrane protein 1, PfEMP1	Pf4000-5	-0.359434
144-V05C	BSPZV1-144	2 wks post final dose	675000	Not Protected	PF3D7_1354600.iso1.exon2.amp1_3230	PF3D7_1354600.iso1.exon2.amp1	PF3D7_1354600	60S ribosomal protein L7-2, putative	Pf4000-5	0.260987
144-V05C	BSPZV1-144	2 wks post final dose	675000	Not Protected	PF3D7_0708700.1o1_6687	PF3D7_0708700.1o1	PF3D7_0708700	Cg8 protein	Pf4500-4	-0.356475
144-V05C	BSPZV1-144	2 wks post final dose	675000	Not Protected	PF3D7_1243100.iso1.exon1.amp1_4148	PF3D7_1243100.iso1.exon1.amp1	PF3D7_1243100	zinc finger protein, putative	Pf4000-5	0.103319
144-V05C	BSPZV1-144	2 wks post final dose	675000	Not Protected	PF3D7_0208600.1o1_8195	PF3D7_0208600.1o1	PF3D7_0208600	ribosome-recycling factor, putative (RRF)	Pf4500-4	-0.360178
144-V05C	BSPZV1-144	2 wks post final dose	675000	Not Protected	PF3D7_1444400.1o3_6455	PF3D7_1444400.1o3	PF3D7_1444400	conserved Plasmodium protein, unknown function	Pf4500-4	-0.239993
144-V05C	BSPZV1-144	2 wks post final dose	675000	Not Protected	PF3D7_0105800.iso1.exon1.amp1_126	PF3D7_0105800.iso1.exon1.amp1	PF3D7_0105800	conserved Plasmodium protein, unknown function	Pf4000-5	-0.141111
144-V05C	BSPZV1-144	2 wks post final dose	675000	Not Protected	PF3D7_1141000.iso1.exon1.amp1_short_4029	PF3D7_1141000.iso1.exon1.amp1_short	PF3D7_1141000	conserved Plasmodium protein, unknown function	Pf4000-5	0.1666
144-V05C	BSPZV1-144	2 wks post final dose	675000	Not Protected	PF3D7_1345000.iso1.exon11.amp1_623	PF3D7_1345000.iso1.exon11.amp1	PF3D7_1345000	conserved Plasmodium protein, unknown function	Pf4000-5	0.223834
144-V05C	BSPZV1-144	2 wks post final dose	675000	Not Protected	PF3D7_1037000.iso1.exon3.amp3_748	PF3D7_1037000.iso1.exon3.amp3	PF3D7_1037000	DNA polymerase zeta catalytic subunit, putative	Pf4000-5	-0.00416357
144-V05C	BSPZV1-144	2 wks post final dose	675000	Not Protected	PF3D7_0711200.iso1.exon1.amp1_2331	PF3D7_0711200.iso1.exon1.amp1	PF3D7_0711200	conserved Plasmodium protein, unknown function	Pf4000-5	0.211918
144-V05C	BSPZV1-144	2 wks post final dose	675000	Not Protected	PF3D7_1221800.1o1_7636	PF3D7_1221800.1o1	PF3D7_1221800	conserved Plasmodium protein, unknown function	Pf4500-4	0.594114
144-V05C	BSPZV1-144	2 wks post final dose	675000	Not Protected	PF3D7_1455000.iso1.exon1.amp1_1834	PF3D7_1455000.iso1.exon1.amp1	PF3D7_1455000	protein phosphatase, putative	Pf4000-5	1.26429
144-V05C	BSPZV1-144	2 wks post final dose	675000	Not Protected	PF3D7_1439100.e1s2_6064	PF3D7_1439100.e1s2	PF3D7_1439100	DEAD/DEAH box helicase, putative	Pf4500-4	0.155062
144-V05C	BSPZV1-144	2 wks post final dose	675000	Not Protected	PF3D7_1316100.iso1.exon1.amp2_756	PF3D7_1316100.iso1.exon1.amp2	PF3D7_1316100	inositol polyphosphate kinase, putative	Pf4000-5	0.315619
144-V05C	BSPZV1-144	2 wks post final dose	675000	Not Protected	PF3D7_1128000.1.4o4_8530	PF3D7_1128000.1.4o4	PF3D7_1128000.1	conserved Plasmodium protein, unknown function	Pf4500-4	-1.61887
144-V05C	BSPZV1-144	2 wks post final dose	675000	Not Protected	PF3D7_0417400.iso1.exon1.amp6_seg1_1730	PF3D7_0417400.iso1.exon1.amp6_seg1	PF3D7_0417400	conserved Plasmodium protein, unknown function	Pf4000-5	0.19403
144-V05C	BSPZV1-144	2 wks post final dose	675000	Not Protected	PF3D7_1431500.iso1.exon1.amp1_1323	PF3D7_1431500.iso1.exon1.amp1	PF3D7_1431500	mitogen-activated protein kinase 1	Pf4000-5	0.335682
144-V05C	BSPZV1-144	2 wks post final dose	675000	Not Protected	PF3D7_0105100.iso1.exon1.amp1_964	PF3D7_0105100.iso1.exon1.amp1	PF3D7_0105100	conserved Plasmodium protein, unknown function	Pf4000-5	0.0167311
144-V05C	BSPZV1-144	2 wks post final dose	675000	Not Protected	PF3D7_1026200.iso1.exon1.amp1_2760	PF3D7_1026200.iso1.exon1.amp1	PF3D7_1026200	conserved Plasmodium protein, unknown function	Pf4000-5	0.77356
144-V05C	BSPZV1-144	2 wks post final dose	675000	Not Protected	PF3D7_0422000.5o5_7285	PF3D7_0422000.5o5	PF3D7_0422000	steroid dehydrogenase, putative	Pf4500-4	0.135384
144-V05C	BSPZV1-144	2 wks post final dose	675000	Not Protected	PF3D7_0213700.e1s1_6878	PF3D7_0213700.e1s1	PF3D7_0213700	conserved protein, unknown function	Pf4500-4	0.0141819
144-V05C	BSPZV1-144	2 wks post final dose	675000	Not Protected	PF3D7_0207400.2o4_5346	PF3D7_0207400.2o4	PF3D7_0207400	serine repeat antigen 7 (SERA7)	Pf4500-4	0.245401
144-V05C	BSPZV1-144	2 wks post final dose	675000	Not Protected	PF3D7_0311000.2o2_8988	PF3D7_0311000.2o2	PF3D7_0311000	conserved Plasmodium protein, unknown function	Pf4500-4	-0.129265
144-V05C	BSPZV1-144	2 wks post final dose	675000	Not Protected	PF3D7_1220400.iso1.exon1.amp1_3047	PF3D7_1220400.iso1.exon1.amp1	PF3D7_1220400	debranching enzyme-associated ribonuclease, putative	Pf4000-5	-0.246147
144-V05C	BSPZV1-144	2 wks post final dose	675000	Not Protected	PF3D7_1411400.iso1.exon1.amp3_1922	PF3D7_1411400.iso1.exon1.amp3	PF3D7_1411400	plastid replication-repair enzyme	Pf4000-5	0.728387
144-V05C	BSPZV1-144	2 wks post final dose	675000	Not Protected	PF3D7_0315900.1o2_6120	PF3D7_0315900.1o2	PF3D7_0315900	conserved Plasmodium protein, unknown function	Pf4500-4	0.0231174
144-V05C	BSPZV1-144	2 wks post final dose	675000	Not Protected	PF3D7_1414900.iso1.exon1.amp2_3654	PF3D7_1414900.iso1.exon1.amp2	PF3D7_1414900	ATP-dependent protease, putative	Pf4000-5	0.776799
144-V05C	BSPZV1-144	2 wks post final dose	675000	Not Protected	PF3D7_0401000.iso1.exon1.amp1_2432	PF3D7_0401000.iso1.exon1.amp1	PF3D7_0401000	rifin	Pf4000-5	3.29644
144-V05C	BSPZV1-144	2 wks post final dose	675000	Not Protected	PF3D7_1365000.iso1.exon1.amp1_1586	PF3D7_1365000.iso1.exon1.amp1	PF3D7_1365000	conserved Plasmodium protein, unknown function	Pf4000-5	0.34444
144-V05C	BSPZV1-144	2 wks post final dose	675000	Not Protected	PF3D7_1472200.e1s1_8267	PF3D7_1472200.e1s1	PF3D7_1472200	histone deacetylase, putative	Pf4500-4	-0.34371
144-V05C	BSPZV1-144	2 wks post final dose	675000	Not Protected	PF3D7_0710300.iso1.exon1.amp1_46	PF3D7_0710300.iso1.exon1.amp1	PF3D7_0710300	conserved Plasmodium membrane protein, unknown function	Pf4000-5	-0.184776
144-V05C	BSPZV1-144	2 wks post final dose	675000	Not Protected	PF3D7_1250200.e1_6527	PF3D7_1250200.e1	PF3D7_1250200	conserved Plasmodium membrane protein, unknown function	Pf4500-4	0.0464296
144-V05C	BSPZV1-144	2 wks post final dose	675000	Not Protected	PF3D7_0831800.2o2_5849	PF3D7_0831800.2o2	PF3D7_0831800	histidine-rich protein II (HRPII)	Pf4500-4	0.147258
144-V05C	BSPZV1-144	2 wks post final dose	675000	Not Protected	PF3D7_1409300.1o1_4987	PF3D7_1409300.1o1	PF3D7_1409300	DNA-damage inducible protein, putative	Pf4500-4	-0.276151
144-V05C	BSPZV1-144	2 wks post final dose	675000	Not Protected	PF3D7_0622500.iso1.exon1.amp1_2161	PF3D7_0622500.iso1.exon1.amp1	PF3D7_0622500	RNA methyltransferase, putative	Pf4000-5	0.146707
144-V05C	BSPZV1-144	2 wks post final dose	675000	Not Protected	PF3D7_1211900.e1s1_5489	PF3D7_1211900.e1s1	PF3D7_1211900	non-SERCA-type Ca2 -transporting P-ATPase (ATP4)	Pf4500-4	1.11561
144-V05C	BSPZV1-144	2 wks post final dose	675000	Not Protected	PF3D7_1479700.iso1.exon2.amp1_4180	PF3D7_1479700.iso1.exon2.amp1	PF3D7_1479700	rifin	Pf4000-5	1.58859
144-V05C	BSPZV1-144	2 wks post final dose	675000	Not Protected	PF3D7_0910900.iso1.exon2.amp1_3342	PF3D7_0910900.iso1.exon2.amp1	PF3D7_0910900	DNA primase large subunit, putative	Pf4000-5	1.7153
144-V05C	BSPZV1-144	2 wks post final dose	675000	Not Protected	PF3D7_1116000.iso1.exon2.amp2_3382	PF3D7_1116000.iso1.exon2.amp2	PF3D7_1116000	rhoptry neck protein 4	Pf4000-5	0.563889
144-V05C	BSPZV1-144	2 wks post final dose	675000	Not Protected	PF3D7_0625800.1o1_5609	PF3D7_0625800.1o1	PF3D7_0625800	conserved Plasmodium protein, unknown function	Pf4500-4	0.410698
144-V05C	BSPZV1-144	2 wks post final dose	675000	Not Protected	PF3D7_1247500.1o1_6495	PF3D7_1247500.1o1	PF3D7_1247500	serine/threonine protein kinase, putative	Pf4500-4	-0.073281
144-V05C	BSPZV1-144	2 wks post final dose	675000	Not Protected	PF3D7_0720800.iso1.exon2.amp1_1762	PF3D7_0720800.iso1.exon2.amp1	PF3D7_0720800	Ham1-like protein, putative	Pf4000-5	0.0096687
144-V05C	BSPZV1-144	2 wks post final dose	675000	Not Protected	PF3D7_0704400.iso1.exon1.amp1_1131	PF3D7_0704400.iso1.exon1.amp1	PF3D7_0704400	phosphoinositide-binding protein, putative	Pf4000-5	0.655223
144-V05C	BSPZV1-144	2 wks post final dose	675000	Not Protected	PF3D7_1214100.2o4_7094	PF3D7_1214100.2o4	PF3D7_1214100	phosphatidylinositol-glycan biosynthesis class O protein, putative	Pf4500-4	0.00211706
144-V05C	BSPZV1-144	2 wks post final dose	675000	Not Protected	PF3D7_0324900.iso1.exon1.amp1_2456	PF3D7_0324900.iso1.exon1.amp1	PF3D7_0324900	erythrocyte membrane protein 1, PfEMP1	Pf4000-5	0.386394
144-V05C	BSPZV1-144	2 wks post final dose	675000	Not Protected	PFC10_API0027.iso1.exon1.amp1_309	PFC10_API0027.iso1.exon1.amp1	PFC10_API0027	probable protein, unknown function (ORF78)	Pf4000-5	0.0522978
144-V05C	BSPZV1-144	2 wks post final dose	675000	Not Protected	PF3D7_0609200.2o2_7030	PF3D7_0609200.2o2	PF3D7_0609200	citrate synthase-like protein, putative	Pf4500-4	0.0845258
144-V05C	BSPZV1-144	2 wks post final dose	675000	Not Protected	PF3D7_0831500.iso1.exon2.amp1_2951	PF3D7_0831500.iso1.exon2.amp1	PF3D7_0831500	Plasmodium exported protein (PHIST), unknown function	Pf4000-5	1.35338
144-V05C	BSPZV1-144	2 wks post final dose	675000	Not Protected	PF3D7_1331100.iso1.exon6.amp1_1570	PF3D7_1331100.iso1.exon6.amp1	PF3D7_1331100	DEAD box helicase, putative	Pf4000-5	1.18544
144-V05C	BSPZV1-144	2 wks post final dose	675000	Not Protected	PF3D7_1149000.e1s2_8578	PF3D7_1149000.e1s2	PF3D7_1149000	antigen 332, DBL-like protein (Pf332)	Pf4500-4	-0.018413
144-V05C	BSPZV1-144	2 wks post final dose	675000	Not Protected	PF3D7_0102200.e2s1_7477	PF3D7_0102200.e2s1	PF3D7_0102200	ring-infected erythrocyte surface antigen (RESA)	Pf4500-4	0.547174
144-V05C	BSPZV1-144	2 wks post final dose	675000	Not Protected	PF3D7_0616200.1o5_9065	PF3D7_0616200.1o5	PF3D7_0616200	Ndc80 homologue, putative	Pf4500-4	-0.144299
144-V05C	BSPZV1-144	2 wks post final dose	675000	Not Protected	PF3D7_1144700.1o5_7261	PF3D7_1144700.1o5	PF3D7_1144700	apicoplast import protein Tic20, putative (TIC20)	Pf4500-4	0.113298
144-V05C	BSPZV1-144	2 wks post final dose	675000	Not Protected	PF3D7_1223400.4o6_5928	PF3D7_1223400.4o6	PF3D7_1223400	phospholipid-transporting ATPase, putative	Pf4500-4	-0.121492
144-V05C	BSPZV1-144	2 wks post final dose	675000	Not Protected	PF3D7_1454700.e1s1_8626	PF3D7_1454700.e1s1	PF3D7_1454700	6-phosphogluconate dehydrogenase, decarboxylating, putative	Pf4500-4	0.853891
144-V05C	BSPZV1-144	2 wks post final dose	675000	Not Protected	PF3D7_1318400.iso1.exon1.amp1_2986	PF3D7_1318400.iso1.exon1.amp1	PF3D7_1318400	chromosome segregation protein, putative	Pf4000-5	0.291719
144-V05C	BSPZV1-144	2 wks post final dose	675000	Not Protected	PF3D7_0317000.e2s1_7740	PF3D7_0317000.e2s1	PF3D7_0317000	proteasome component C8, putative	Pf4500-4	-0.236131
144-V05C	BSPZV1-144	2 wks post final dose	675000	Not Protected	PF3D7_1107400.iso1.exon1.amp1_3598	PF3D7_1107400.iso1.exon1.amp1	PF3D7_1107400	Rad51 homolog	Pf4000-5	1.38617
144-V05C	BSPZV1-144	2 wks post final dose	675000	Not Protected	PF3D7_0918000.e1s1_8347	PF3D7_0918000.e1s1	PF3D7_0918000	glideosome-associated protein 50,secreted acid phosphatase (GAP50)	Pf4500-4	0.298669
144-V05C	BSPZV1-144	2 wks post final dose	675000	Not Protected	PF3D7_0501100.1.e3s1_7453	PF3D7_0501100.1.e3s1	PF3D7_0501100.1	heat shock protein 40, type II (HSP40)	Pf4500-4	0.20186
144-V05C	BSPZV1-144	2 wks post final dose	675000	Not Protected	PF3D7_0209100.2o3_8219	PF3D7_0209100.2o3	PF3D7_0209100	phospholipase A2, putative	Pf4500-4	0.354566
144-V05C	BSPZV1-144	2 wks post final dose	675000	Not Protected	PF3D7_0302200.e1_5952	PF3D7_0302200.e1	PF3D7_0302200	cytoadherence linked asexual protein 3.2 (CLAG3.2)	Pf4500-4	0.578464
144-V05C	BSPZV1-144	2 wks post final dose	675000	Not Protected	PF3D7_0214400.1o3_7333	PF3D7_0214400.1o3	PF3D7_0214400	conserved Plasmodium protein, unknown function	Pf4500-4	0.0153257
144-V05C	BSPZV1-144	2 wks post final dose	675000	Not Protected	PF3D7_0321600.1o2_4747	PF3D7_0321600.1o2	PF3D7_0321600	ATP-dependent RNA helicase, putative	Pf4500-4	-0.0789657
144-V05C	BSPZV1-144	2 wks post final dose	675000	Not Protected	PF3D7_0203100.e2s1_4771	PF3D7_0203100.e2s1	PF3D7_0203100	protein kinase, putative	Pf4500-4	0.200855
144-V05C	BSPZV1-144	2 wks post final dose	675000	Not Protected	PF3D7_1125300.iso1.exon1.amp1_2856	PF3D7_1125300.iso1.exon1.amp1	PF3D7_1125300	DNA-directed RNA polymerase	Pf4000-5	1.09972
144-V05C	BSPZV1-144	2 wks post final dose	675000	Not Protected	PF3D7_0404300.4o8_5314	PF3D7_0404300.4o8	PF3D7_0404300	conserved Plasmodium protein, unknown function	Pf4500-4	0.199178
144-V05C	BSPZV1-144	2 wks post final dose	675000	Not Protected	PF3D7_0508100.iso1.exon1.amp2_1906	PF3D7_0508100.iso1.exon1.amp2	PF3D7_0508100	SET domain protein, putative	Pf4000-5	-0.117078
144-V05C	BSPZV1-144	2 wks post final dose	675000	Not Protected	PF3D7_0713200.2o2_8421	PF3D7_0713200.2o2	PF3D7_0713200	RESA-like protein	Pf4500-4	-0.174844
144-V05C	BSPZV1-144	2 wks post final dose	675000	Not Protected	PF3D7_0924600.iso1.exon2.amp2_seg1_2289	PF3D7_0924600.iso1.exon2.amp2_seg1	PF3D7_0924600	conserved Plasmodium protein, unknown function	Pf4000-5	1.29906
144-V05C	BSPZV1-144	2 wks post final dose	675000	Not Protected	PF3D7_1422300.iso1.exon1.amp1_708	PF3D7_1422300.iso1.exon1.amp1	PF3D7_1422300	DnaJ protein, putative	Pf4000-5	0.242028
144-V05C	BSPZV1-144	2 wks post final dose	675000	Not Protected	PF3D7_1244400.iso1.exon1.amp2_1954	PF3D7_1244400.iso1.exon1.amp2	PF3D7_1244400	conserved Plasmodium protein, unknown function	Pf4000-5	1.03665
144-V05C	BSPZV1-144	2 wks post final dose	675000	Not Protected	PF3D7_1113600.1o1_9033	PF3D7_1113600.1o1	PF3D7_1113600	Rpr2, RNAse P, putative	Pf4500-4	-0.597147
144-V05C	BSPZV1-144	2 wks post final dose	675000	Not Protected	PF3D7_0910000.iso1.exon1.amp2_1355	PF3D7_0910000.iso1.exon1.amp2	PF3D7_0910000	SET domain protein, putative	Pf4000-5	0.855829
144-V05C	BSPZV1-144	2 wks post final dose	675000	Not Protected	PF3D7_0910200.iso1.exon1.amp1_1395	PF3D7_0910200.iso1.exon1.amp1	PF3D7_0910200	conserved Plasmodium protein, unknown function	Pf4000-5	0.478367
144-V05C	BSPZV1-144	2 wks post final dose	675000	Not Protected	PF3D7_0812220.iso1.exon15.amp1_2113	PF3D7_0812220.iso1.exon15.amp1	PF3D7_0812220	GTPase, putative	Pf4000-5	-0.778881
144-V05C	BSPZV1-144	2 wks post final dose	675000	Not Protected	PF3D7_1016300.e1s1_5130	PF3D7_1016300.e1s1	PF3D7_1016300	glycophorin binding protein (GBP)	Pf4500-4	1.79794
144-V05C	BSPZV1-144	2 wks post final dose	675000	Not Protected	PF3D7_0318600.iso1.exon1.amp1_836	PF3D7_0318600.iso1.exon1.amp1	PF3D7_0318600	cleavage and polyadenylation specifity factor, putative	Pf4000-5	0.360104
144-V05C	BSPZV1-144	2 wks post final dose	675000	Not Protected	PF3D7_1367200.iso1.exon2.amp1_2089	PF3D7_1367200.iso1.exon2.amp1	PF3D7_1367200	conserved Plasmodium protein, unknown function	Pf4000-5	0.314664
144-V05C	BSPZV1-144	2 wks post final dose	675000	Not Protected	PF3D7_1421400.5o5_5561	PF3D7_1421400.5o5	PF3D7_1421400	DNA-directed RNA polymerase III subunit C, putative	Pf4500-4	0.0160877
144-V05C	BSPZV1-144	2 wks post final dose	675000	Not Protected	PF3D7_1244100.e3s1_9177	PF3D7_1244100.e3s1	PF3D7_1244100	conserved Plasmodium protein, unknown function	Pf4500-4	-0.331784
144-V05C	BSPZV1-144	2 wks post final dose	675000	Not Protected	PF3D7_0727800.iso1.exon1.amp2_2784	PF3D7_0727800.iso1.exon1.amp2	PF3D7_0727800	cation transporting ATPase, putative	Pf4000-5	0.00257153
144-V05C	BSPZV1-144	2 wks post final dose	675000	Not Protected	PF3D7_1211500.iso1.exon1.amp1_2448	PF3D7_1211500.iso1.exon1.amp1	PF3D7_1211500	mitochondrial ribosomal protein S18 precursor, putative	Pf4000-5	-0.0812398
144-V05C	BSPZV1-144	2 wks post final dose	675000	Not Protected	PF3D7_1453200.iso1.exon6.amp1_2664	PF3D7_1453200.iso1.exon6.amp1	PF3D7_1453200	conserved Plasmodium protein, unknown function	Pf4000-5	0.321809
144-V05C	BSPZV1-144	2 wks post final dose	675000	Not Protected	PF3D7_1314700.4o4_6184	PF3D7_1314700.4o4	PF3D7_1314700	conserved Plasmodium protein, unknown function	Pf4500-4	0.333781
144-V05C	BSPZV1-144	2 wks post final dose	675000	Not Protected	PF3D7_1111600.iso1.exon1.amp1_437	PF3D7_1111600.iso1.exon1.amp1	PF3D7_1111600	endonuclease/exonuclease/phosphatase family protein, putative	Pf4000-5	0.899361
144-V05C	BSPZV1-144	2 wks post final dose	675000	Not Protected	PF3D7_0507200.iso1.exon1.amp1_150	PF3D7_0507200.iso1.exon1.amp1	PF3D7_0507200	subtilisin-like protease 3	Pf4000-5	0.422147
144-V05C	BSPZV1-144	2 wks post final dose	675000	Not Protected	PF3D7_0718000.e9s3_8251	PF3D7_0718000.e9s3	PF3D7_0718000	dynein heavy chain, putative	Pf4500-4	-0.139836
144-V05C	BSPZV1-144	2 wks post final dose	675000	Not Protected	PF3D7_0605800.iso1.exon1.amp2_4005	PF3D7_0605800.iso1.exon1.amp2	PF3D7_0605800	DNA repair-like protein, putative	Pf4000-5	0.268567
144-V05C	BSPZV1-144	2 wks post final dose	675000	Not Protected	PF3D7_1018300.e1s1_5945	PF3D7_1018300.e1s1	PF3D7_1018300	conserved Plasmodium protein, unknown function	Pf4500-4	0.193969
144-V05C	BSPZV1-144	2 wks post final dose	675000	Not Protected	PF3D7_0918200.iso1.exon1.amp1_4412	PF3D7_0918200.iso1.exon1.amp1	PF3D7_0918200	organelle ribosomal protein L3 precursor, putative	Pf4000-5	-0.00833925
144-V05C	BSPZV1-144	2 wks post final dose	675000	Not Protected	PF3D7_1206700.1o1_7341	PF3D7_1206700.1o1	PF3D7_1206700	eukaryotic translation initiation factor 5, putative	Pf4500-4	-0.157126
144-V05C	BSPZV1-144	2 wks post final dose	675000	Not Protected	PF3D7_0934900.iso1.exon1.amp1_2999	PF3D7_0934900.iso1.exon1.amp1	PF3D7_0934900	conserved Plasmodium protein, unknown function	Pf4000-5	0.168186
144-V05C	BSPZV1-144	2 wks post final dose	675000	Not Protected	PF3D7_1105000_8291	PF3D7_1105000	PF3D7_1105000	histone H4 (H4)	Pf4500-4	0.12288
144-V05C	BSPZV1-144	2 wks post final dose	675000	Not Protected	PF3D7_0926300.iso1.exon13.amp1_2385	PF3D7_0926300.iso1.exon13.amp1	PF3D7_0926300	protein kinase, putative	Pf4000-5	-0.339006
144-V05C	BSPZV1-144	2 wks post final dose	675000	Not Protected	PF3D7_1012700.e1s1_7980	PF3D7_1012700.e1s1	PF3D7_1012700	protein phosphatase, putative	Pf4500-4	3.09649
144-V05C	BSPZV1-144	2 wks post final dose	675000	Not Protected	PF3D7_1353100.e2s1_8339	PF3D7_1353100.e2s1	PF3D7_1353100	Plasmodium exported protein, unknown function	Pf4500-4	0.855914
144-V05C	BSPZV1-144	2 wks post final dose	675000	Not Protected	PF3D7_1020800.3o11_6759	PF3D7_1020800.3o11	PF3D7_1020800	dihydrolipoamide acyltransferase component E2 (DLAT)	Pf4500-4	0.170717
144-V05C	BSPZV1-144	2 wks post final dose	675000	Not Protected	PF3D7_1249800.e1s3_4827	PF3D7_1249800.e1s3	PF3D7_1249800	conserved Plasmodium protein, unknown function	Pf4500-4	0.177715
144-V05C	BSPZV1-144	2 wks post final dose	675000	Not Protected	PF3D7_0611500.1o1_6713	PF3D7_0611500.1o1	PF3D7_0611500	conserved Plasmodium protein, unknown function	Pf4500-4	0.351852
144-V05C	BSPZV1-144	2 wks post final dose	675000	Not Protected	PF3D7_0308500.iso1.exon2.amp1_3821	PF3D7_0308500.iso1.exon2.amp1	PF3D7_0308500	activator of Hsp90 ATPase, putative	Pf4000-5	-1.03183
144-V05C	BSPZV1-144	2 wks post final dose	675000	Not Protected	PF3D7_1140700.e1s1_7501	PF3D7_1140700.e1s1	PF3D7_1140700	conserved Plasmodium protein, unknown function	Pf4500-4	-0.359931
144-V05C	BSPZV1-144	2 wks post final dose	675000	Not Protected	PF3D7_1464700.e1s1_6040	PF3D7_1464700.e1s1	PF3D7_1464700	ATP synthase (C/AC39) subunit, putative	Pf4500-4	0.398184
144-V05C	BSPZV1-144	2 wks post final dose	675000	Not Protected	PF3D7_0917800.1o1_4995	PF3D7_0917800.1o1	PF3D7_0917800	conserved Plasmodium protein, unknown function	Pf4500-4	-0.113344
144-V05C	BSPZV1-144	2 wks post final dose	675000	Not Protected	PF3D7_1323600.e1s1_6902	PF3D7_1323600.e1s1	PF3D7_1323600	conserved Plasmodium protein, unknown function	Pf4500-4	0.368805
144-V05C	BSPZV1-144	2 wks post final dose	675000	Not Protected	PF3D7_1422100.iso1.exon1.amp1_421	PF3D7_1422100.iso1.exon1.amp1	PF3D7_1422100	mitochondrial ribosomal protein L21 precursor, putative	Pf4000-5	0.284585
144-V05C	BSPZV1-144	2 wks post final dose	675000	Not Protected	PF3D7_1012000.iso1.exon9.amp1_3295	PF3D7_1012000.iso1.exon9.amp1	PF3D7_1012000	ubiquitin-protein ligase e3, putative	Pf4000-5	0.528503
144-V05C	BSPZV1-144	2 wks post final dose	675000	Not Protected	PF3D7_0716000.iso1.exon1.amp2_2800	PF3D7_0716000.iso1.exon1.amp2	PF3D7_0716000	RNA binding protein, putative	Pf4000-5	-0.0722614
144-V05C	BSPZV1-144	2 wks post final dose	675000	Not Protected	PF3D7_1301500.2o2_8722	PF3D7_1301500.2o2	PF3D7_1301500	Plasmodium exported protein (PHISTa), unknown function	Pf4500-4	2.69255
144-V05C	BSPZV1-144	2 wks post final dose	675000	Not Protected	PF3D7_1447800.e1s2_5992	PF3D7_1447800.e1s2	PF3D7_1447800	conserved Plasmodium protein, unknown function	Pf4500-4	0.611235
144-V05C	BSPZV1-144	2 wks post final dose	675000	Not Protected	PF3D7_1133500.iso1.exon2.amp1_4149	PF3D7_1133500.iso1.exon2.amp1	PF3D7_1133500	conserved Plasmodium protein, unknown function	Pf4000-5	1.19628
144-V05C	BSPZV1-144	2 wks post final dose	675000	Not Protected	PF3D7_1226500.iso1.exon1.amp2_3358	PF3D7_1226500.iso1.exon1.amp2	PF3D7_1226500	RAP protein, putative	Pf4000-5	0.0386774
144-V05C	BSPZV1-144	2 wks post final dose	675000	Not Protected	PF3D7_1303200.iso2.exon5.amp1_3550	PF3D7_1303200.iso2.exon5.amp1	PF3D7_1303200	SNARE protein, putative	Pf4000-5	0.170651
144-V05C	BSPZV1-144	2 wks post final dose	675000	Not Protected	PF3D7_1435500.1o1_5250	PF3D7_1435500.1o1	PF3D7_1435500	conserved Plasmodium protein, unknown function	Pf4500-4	0.209875
144-V05C	BSPZV1-144	2 wks post final dose	675000	Not Protected	PF3D7_0307700.e3s1_8243	PF3D7_0307700.e3s1	PF3D7_0307700	conserved Plasmodium protein, unknown function	Pf4500-4	0.0612723
144-V05C	BSPZV1-144	2 wks post final dose	675000	Not Protected	PF3D7_1121700.e1s1_5657	PF3D7_1121700.e1s1	PF3D7_1121700	protein GCN20 (GCN20)	Pf4500-4	0.815996
144-V05C	BSPZV1-144	2 wks post final dose	675000	Not Protected	PF3D7_1143000.iso1.exon1.amp1_3893	PF3D7_1143000.iso1.exon1.amp1	PF3D7_1143000	alpha/beta hydrolase, putative	Pf4000-5	0.351285
144-V05C	BSPZV1-144	2 wks post final dose	675000	Not Protected	PF3D7_0500100.iso1.exon2.amp1_1299	PF3D7_0500100.iso1.exon2.amp1	PF3D7_0500100	erythrocyte membrane protein 1, PfEMP1	Pf4000-5	2.93622
144-V05C	BSPZV1-144	2 wks post final dose	675000	Not Protected	PF3D7_0617100.2o7_8539	PF3D7_0617100.2o7	PF3D7_0617100	alpha adaptin-like protein, putative	Pf4500-4	-0.106278
144-V05C	BSPZV1-144	2 wks post final dose	675000	Not Protected	PF3D7_0933100.4o4_8227	PF3D7_0933100.4o4	PF3D7_0933100	conserved Plasmodium protein, unknown function	Pf4500-4	1.0319
144-V05C	BSPZV1-144	2 wks post final dose	675000	Not Protected	PF3D7_1427300.iso1.exon1.amp1_1946	PF3D7_1427300.iso1.exon1.amp1	PF3D7_1427300	conserved Plasmodium protein, unknown function	Pf4000-5	0.685822
144-V05C	BSPZV1-144	2 wks post final dose	675000	Not Protected	PF3D7_0611000.2o3_5546	PF3D7_0611000.2o3	PF3D7_0611000	conserved Plasmodium membrane protein, unknown function	Pf4500-4	-0.256233
144-V05C	BSPZV1-144	2 wks post final dose	675000	Not Protected	PF3D7_1003100.iso1.exon3.amp1_38	PF3D7_1003100.iso1.exon3.amp1	PF3D7_1003100	conserved Plasmodium protein, unknown function	Pf4000-5	0.0157523
144-V05C	BSPZV1-144	2 wks post final dose	675000	Not Protected	PF3D7_0825000.iso1.exon2.amp2_3694	PF3D7_0825000.iso1.exon2.amp2	PF3D7_0825000	conserved Plasmodium protein, unknown function	Pf4000-5	0.222986
144-V05C	BSPZV1-144	2 wks post final dose	675000	Not Protected	PF3D7_1407100.e2s1_8634	PF3D7_1407100.e2s1	PF3D7_1407100	fibrillarin, putative (NOP1)	Pf4500-4	0.560816
144-V05C	BSPZV1-144	2 wks post final dose	675000	Not Protected	PF3D7_1403900.e1s1_8052	PF3D7_1403900.e1s1	PF3D7_1403900	phosphatase, putative	Pf4500-4	0.193463
144-V05C	BSPZV1-144	2 wks post final dose	675000	Not Protected	PF3D7_0926300.iso1.exon8.amp1_4101	PF3D7_0926300.iso1.exon8.amp1	PF3D7_0926300	protein kinase, putative	Pf4000-5	0.179419
144-V05C	BSPZV1-144	2 wks post final dose	675000	Not Protected	PF3D7_1251800.1o1_6471	PF3D7_1251800.1o1	PF3D7_1251800	conserved Plasmodium protein, unknown function	Pf4500-4	0.0590556
144-V05C	BSPZV1-144	2 wks post final dose	675000	Not Protected	PF3D7_1413800.1o1_8182	PF3D7_1413800.1o1	PF3D7_1413800	diphthamide synthesis protein, putative	Pf4500-4	0.11792
144-V05C	BSPZV1-144	2 wks post final dose	675000	Not Protected	PF3D7_1232100.e1_8842	PF3D7_1232100.e1	PF3D7_1232100	60 kDa chaperonin (CPN60)	Pf4500-4	0.491001
144-V05C	BSPZV1-144	2 wks post final dose	675000	Not Protected	PF3D7_0214500.iso1.exon1.amp1_3885	PF3D7_0214500.iso1.exon1.amp1	PF3D7_0214500	conserved Plasmodium protein, unknown function	Pf4000-5	-0.106169
144-V05C	BSPZV1-144	2 wks post final dose	675000	Not Protected	PF3D7_1003000.iso1.exon1.amp1_seg1_3454	PF3D7_1003000.iso1.exon1.amp1_seg1	PF3D7_1003000	conserved Plasmodium protein, unknown function	Pf4000-5	0.0186868
144-V05C	BSPZV1-144	2 wks post final dose	675000	Not Protected	PF3D7_1316800.iso1.exon7.amp1_3502	PF3D7_1316800.iso1.exon7.amp1	PF3D7_1316800	sec20 homolog, putative	Pf4000-5	0.113603
144-V05C	BSPZV1-144	2 wks post final dose	675000	Not Protected	PF3D7_1361100.e1s1_7142	PF3D7_1361100.e1s1	PF3D7_1361100	Sec24 subunit a (SEC24a)	Pf4500-4	-1.47541
144-V05C	BSPZV1-144	2 wks post final dose	675000	Not Protected	PF3D7_1146700.iso1.exon2.amp1_1802	PF3D7_1146700.iso1.exon2.amp1	PF3D7_1146700	kinesin-like protein, putative	Pf4000-5	0.274799
144-V05C	BSPZV1-144	2 wks post final dose	675000	Not Protected	PF3D7_0111000.e5s1_5681	PF3D7_0111000.e5s1	PF3D7_0111000	kinesin, putative	Pf4500-4	0.49196
144-V05C	BSPZV1-144	2 wks post final dose	675000	Not Protected	PF3D7_1348800.3o4_7669	PF3D7_1348800.3o4	PF3D7_1348800	E1-E2 ATPase, putative	Pf4500-4	0.0743184
144-V05C	BSPZV1-144	2 wks post final dose	675000	Not Protected	PF3D7_1357700.iso1.exon4.amp2_3670	PF3D7_1357700.iso1.exon4.amp2	PF3D7_1357700	U3 snoRNA-associated small subunit rRNA processing protein, putative	Pf4000-5	0.397108
144-V05C	BSPZV1-144	2 wks post final dose	675000	Not Protected	PF3D7_1104300.iso1.exon1.amp1_4556	PF3D7_1104300.iso1.exon1.amp1	PF3D7_1104300	conserved Plasmodium protein, unknown function	Pf4000-5	-0.247086
144-V05C	BSPZV1-144	2 wks post final dose	675000	Not Protected	PF3D7_1415400.iso1.exon1.amp1_1706	PF3D7_1415400.iso1.exon1.amp1	PF3D7_1415400	conserved Plasmodium protein, unknown function	Pf4000-5	0.489832
144-V05C	BSPZV1-144	2 wks post final dose	675000	Not Protected	PF3D7_1136500.iso2.exon7.amp1_1523	PF3D7_1136500.iso2.exon7.amp1	PF3D7_1136500	casein kinase 1	Pf4000-5	-0.803894
144-V05C	BSPZV1-144	2 wks post final dose	675000	Not Protected	PF3D7_0109100.e1s1_4843	PF3D7_0109100.e1s1	PF3D7_0109100	LCCL domain-containing protein (CCp5)	Pf4500-4	0.199514
144-V05C	BSPZV1-144	2 wks post final dose	675000	Not Protected	PF3D7_0109400.e2s1_6296	PF3D7_0109400.e2s1	PF3D7_0109400	tubulin-specific chaperone a, putative	Pf4500-4	0.158345
144-V05C	BSPZV1-144	2 wks post final dose	675000	Not Protected	PF3D7_1131100.1o1_8810	PF3D7_1131100.1o1	PF3D7_1131100	serpentine receptor, putative (SR1)	Pf4500-4	0.0312442
144-V05C	BSPZV1-144	2 wks post final dose	675000	Not Protected	PF3D7_1130000.1o1_6791	PF3D7_1130000.1o1	PF3D7_1130000	N-acetyl glucosamine phosphate mutase, putative	Pf4500-4	0.223465
144-V05C	BSPZV1-144	2 wks post final dose	675000	Not Protected	PF3D7_1130400_8004	PF3D7_1130400	PF3D7_1130400	26S proteasome regulatory subunit 6a, putative	Pf4500-4	0.552699
144-V05C	BSPZV1-144	2 wks post final dose	675000	Not Protected	PF3D7_0628700.iso1.exon1.amp1_1898	PF3D7_0628700.iso1.exon1.amp1	PF3D7_0628700	conserved Plasmodium protein, unknown function	Pf4000-5	-0.503557
144-V05C	BSPZV1-144	2 wks post final dose	675000	Not Protected	PF3D7_0823400.1o5_8770	PF3D7_0823400.1o5	PF3D7_0823400	alpha/beta-hydrolase, putative	Pf4500-4	-0.129054
144-V05C	BSPZV1-144	2 wks post final dose	675000	Not Protected	PF3D7_1233600.e1s1_5689	PF3D7_1233600.e1s1	PF3D7_1233600	asparagine and aspartate rich protein 1 (AARP1)	Pf4500-4	-0.315874
144-V05C	BSPZV1-144	2 wks post final dose	675000	Not Protected	PF3D7_1371900.2o2_6112	PF3D7_1371900.2o2	PF3D7_1371900	Plasmodium exported protein, unknown function	Pf4500-4	0.221815
144-V05C	BSPZV1-144	2 wks post final dose	675000	Not Protected	PF3D7_0911700_5985	PF3D7_0911700	PF3D7_0911700	GTP binding protein, putative	Pf4500-4	-0.283868
144-V05C	BSPZV1-144	2 wks post final dose	675000	Not Protected	PF3D7_1231400.iso1.exon4.amp1_924	PF3D7_1231400.iso1.exon4.amp1	PF3D7_1231400	amino acid transporter, putative	Pf4000-5	0.501906
144-V05C	BSPZV1-144	2 wks post final dose	675000	Not Protected	PF3D7_0717300.3o4_7605	PF3D7_0717300.3o4	PF3D7_0717300	transcription initiation factor IIE, alpha subunit, putative	Pf4500-4	0.000192693
144-V05C	BSPZV1-144	2 wks post final dose	675000	Not Protected	PF3D7_1361700.e1_7693	PF3D7_1361700.e1	PF3D7_1361700	cytochrome c oxidase subunit 2, putative	Pf4500-4	1.3272
144-V05C	BSPZV1-144	2 wks post final dose	675000	Not Protected	PF3D7_0411700.1o1_4939	PF3D7_0411700.1o1	PF3D7_0411700	conserved Plasmodium protein, unknown function	Pf4500-4	0.453941
144-V05C	BSPZV1-144	2 wks post final dose	675000	Not Protected	PF3D7_0628200.s4_5123	PF3D7_0628200.s4	PF3D7_0628200	protein kinase PK4 (PK4)	Pf4500-4	0.356974
144-V05C	BSPZV1-144	2 wks post final dose	675000	Not Protected	PF3D7_1212300.iso1.exon9.amp1_4372	PF3D7_1212300.iso1.exon9.amp1	PF3D7_1212300	conserved Plasmodium protein, unknown function	Pf4000-5	0.162714
144-V05C	BSPZV1-144	2 wks post final dose	675000	Not Protected	PF3D7_1451800.1o4_5633	PF3D7_1451800.1o4	PF3D7_1451800	sortilin, putative	Pf4500-4	0.19481
144-V05C	BSPZV1-144	2 wks post final dose	675000	Not Protected	PF3D7_1414500.iso1.exon5.amp1_892	PF3D7_1414500.iso1.exon5.amp1	PF3D7_1414500	atypical protein kinase, ABC-1 family, putative	Pf4000-5	-0.322324
144-V05C	BSPZV1-144	2 wks post final dose	675000	Not Protected	PF3D7_1360700.e3_5969	PF3D7_1360700.e3	PF3D7_1360700	SUMO ligase, putative	Pf4500-4	0.751567
144-V05C	BSPZV1-144	2 wks post final dose	675000	Not Protected	PF3D7_0419100.iso1.exon1.amp1_2401	PF3D7_0419100.iso1.exon1.amp1	PF3D7_0419100	conserved Plasmodium protein, unknown function	Pf4000-5	0.0268718
144-V05C	BSPZV1-144	2 wks post final dose	675000	Not Protected	PF3D7_1334500.2o2_7054	PF3D7_1334500.2o2	PF3D7_1334500	conserved Plasmodium protein, unknown function	Pf4500-4	0.163513
144-V05C	BSPZV1-144	2 wks post final dose	675000	Not Protected	PF3D7_0828100.iso1.exon2.amp1_453	PF3D7_0828100.iso1.exon2.amp1	PF3D7_0828100	conserved Plasmodium protein, unknown function	Pf4000-5	0.166776
144-V05C	BSPZV1-144	2 wks post final dose	675000	Not Protected	PF3D7_0804800.e1s1_5442	PF3D7_0804800.e1s1	PF3D7_0804800	peptidyl-prolyl cis-trans isomerase (CYP24)	Pf4500-4	0.673781
144-V05C	BSPZV1-144	2 wks post final dose	675000	Not Protected	PF3D7_0605700.1o1_6136	PF3D7_0605700.1o1	PF3D7_0605700	conserved Plasmodium protein, unknown function	Pf4500-4	-0.151768
144-V05C	BSPZV1-144	2 wks post final dose	675000	Not Protected	PF3D7_1224900.iso1.exon1.amp1_948	PF3D7_1224900.iso1.exon1.amp1	PF3D7_1224900	splicing factor 3b subunit, putative	Pf4000-5	0.625759
144-V05C	BSPZV1-144	2 wks post final dose	675000	Not Protected	PF3D7_1242200.iso1.exon1.amp1_3622	PF3D7_1242200.iso1.exon1.amp1	PF3D7_1242200	queuine tRNA-ribosyltransferase, putative	Pf4000-5	0.226544
144-V05C	BSPZV1-144	2 wks post final dose	675000	Not Protected	PF3D7_1426000_6551	PF3D7_1426000	PF3D7_1426000	60S ribosomal protein L21e, putative	Pf4500-4	0.159552
144-V05C	BSPZV1-144	2 wks post final dose	675000	Not Protected	PF3D7_1340700.iso1.exon1.amp1_54	PF3D7_1340700.iso1.exon1.amp1	PF3D7_1340700	Rab GTPase 11b	Pf4000-5	-0.737692
144-V05C	BSPZV1-144	2 wks post final dose	675000	Not Protected	PF3D7_1471900.iso1.exon1.amp2_3933	PF3D7_1471900.iso1.exon1.amp2	PF3D7_1471900	conserved Plasmodium protein, unknown function	Pf4000-5	-0.102551
144-V05C	BSPZV1-144	2 wks post final dose	675000	Not Protected	PF3D7_0500100.iso1.exon1.amp2_1371	PF3D7_0500100.iso1.exon1.amp2	PF3D7_0500100	erythrocyte membrane protein 1, PfEMP1	Pf4000-5	0.0249272
144-V05C	BSPZV1-144	2 wks post final dose	675000	Not Protected	PF3D7_1372600.iso1.exon2.amp1_102	PF3D7_1372600.iso1.exon2.amp1	PF3D7_1372600	rifin	Pf4000-5	0.286696
144-V05C	BSPZV1-144	2 wks post final dose	675000	Not Protected	PF3D7_1441700.iso1.exon1.amp1_3909	PF3D7_1441700.iso1.exon1.amp1	PF3D7_1441700	conserved Plasmodium protein, unknown function	Pf4000-5	0.972618
144-V05C	BSPZV1-144	2 wks post final dose	675000	Not Protected	PF3D7_1300300.e1s2_5370	PF3D7_1300300.e1s2	PF3D7_1300300	erythrocyte membrane protein 1, PfEMP1 (VAR)	Pf4500-4	0.160069
144-V05C	BSPZV1-144	2 wks post final dose	675000	Not Protected	PF3D7_0207600.e4s1_8076	PF3D7_0207600.e4s1	PF3D7_0207600	serine repeat antigen 5 (SERA5)	Pf4500-4	-0.0223196
144-V05C	BSPZV1-144	2 wks post final dose	675000	Not Protected	PF3D7_0704900.iso1.exon1.amp1_3311	PF3D7_0704900.iso1.exon1.amp1	PF3D7_0704900	peptide chain release factor, putative	Pf4000-5	0.0431037
144-V05C	BSPZV1-144	2 wks post final dose	675000	Not Protected	PF3D7_0801600.1o1_8124	PF3D7_0801600.1o1	PF3D7_0801600	conserved Plasmodium protein, unknown function	Pf4500-4	0.297416
144-V05C	BSPZV1-144	2 wks post final dose	675000	Not Protected	PF3D7_0914700.1o1_6456	PF3D7_0914700.1o1	PF3D7_0914700	transporter, putative	Pf4500-4	-0.220339
144-V05C	BSPZV1-144	2 wks post final dose	675000	Not Protected	PF3D7_1373500.iso1.exon2.amp2_3678	PF3D7_1373500.iso1.exon2.amp2	PF3D7_1373500	erythrocyte membrane protein 1, PfEMP1	Pf4000-5	0.100182
144-V05C	BSPZV1-144	2 wks post final dose	675000	Not Protected	PF3D7_1344000.1o1_7645	PF3D7_1344000.1o1	PF3D7_1344000	aminomethyltransferase, putative	Pf4500-4	-0.26084
144-V05C	BSPZV1-144	2 wks post final dose	675000	Not Protected	PF3D7_1203000.iso1.exon1.amp1_4013	PF3D7_1203000.iso1.exon1.amp1	PF3D7_1203000	origin recognition complex subunit 1	Pf4000-5	0.747028
144-V05C	BSPZV1-144	2 wks post final dose	675000	Not Protected	PF3D7_1450400.iso1.exon1.amp2_1326	PF3D7_1450400.iso1.exon1.amp2	PF3D7_1450400	zinc finger protein, putative	Pf4000-5	0.719758
144-V05C	BSPZV1-144	2 wks post final dose	675000	Not Protected	PF3D7_1209100.iso1.exon1.amp1_166	PF3D7_1209100.iso1.exon1.amp1	PF3D7_1209100	conserved Plasmodium protein, unknown function	Pf4000-5	0.244537
144-V05C	BSPZV1-144	2 wks post final dose	675000	Not Protected	PF3D7_1451500.1o1_7836	PF3D7_1451500.1o1	PF3D7_1451500	conserved Plasmodium protein, unknown function	Pf4500-4	0.631143
144-V05C	BSPZV1-144	2 wks post final dose	675000	Not Protected	PF3D7_1331600.iso1.exon3.amp1_3526	PF3D7_1331600.iso1.exon3.amp1	PF3D7_1331600	protein tyrosine phosphatase, putative	Pf4000-5	0.258176
144-V05C	BSPZV1-144	2 wks post final dose	675000	Not Protected	PF3D7_1354200.1o1_5921	PF3D7_1354200.1o1	PF3D7_1354200	inositol-polyphosphate 5-phosphatase, putative	Pf4500-4	0.249295
144-V05C	BSPZV1-144	2 wks post final dose	675000	Not Protected	PF3D7_1327200.iso1.exon1.amp1_3287	PF3D7_1327200.iso1.exon1.amp1	PF3D7_1327200	ribonuclease P protein subunit rpr, putative	Pf4000-5	0.161652
144-V05C	BSPZV1-144	2 wks post final dose	675000	Not Protected	PF3D7_1028600.iso1.exon2.amp1_1204	PF3D7_1028600.iso1.exon2.amp1	PF3D7_1028600	conserved Plasmodium protein, unknown function	Pf4000-5	0.38412
144-V05C	BSPZV1-144	2 wks post final dose	675000	Not Protected	PF3D7_1020700.e1s2_8363	PF3D7_1020700.e1s2	PF3D7_1020700	ribosomal processing ATPase, putative	Pf4500-4	0.39438
144-V05C	BSPZV1-144	2 wks post final dose	675000	Not Protected	PF3D7_0924000.iso1.exon1.amp2_3981	PF3D7_0924000.iso1.exon1.amp2	PF3D7_0924000	patatin-like phospholipase, putative	Pf4000-5	0.00138526
144-V05C	BSPZV1-144	2 wks post final dose	675000	Not Protected	PF3D7_0715000.1o1_5833	PF3D7_0715000.1o1	PF3D7_0715000	4-nitrophenylphosphatase (PNPase)	Pf4500-4	0.355169
144-V05C	BSPZV1-144	2 wks post final dose	675000	Not Protected	PF3D7_1468000.e3_7405	PF3D7_1468000.e3	PF3D7_1468000	conserved Plasmodium protein, unknown function	Pf4500-4	0.921644
144-V05C	BSPZV1-144	2 wks post final dose	675000	Not Protected	PF3D7_1012900.iso1.exon1.amp1_1874	PF3D7_1012900.iso1.exon1.amp1	PF3D7_1012900	autophagy-related protein 18, putative	Pf4000-5	-0.0637524
144-V05C	BSPZV1-144	2 wks post final dose	675000	Not Protected	PF3D7_1122900.e2s3_6815	PF3D7_1122900.e2s3	PF3D7_1122900	dynein heavy chain, putative	Pf4500-4	0.370147
144-V05C	BSPZV1-144	2 wks post final dose	675000	Not Protected	PF3D7_1002200.2o2_5059	PF3D7_1002200.2o2	PF3D7_1002200	tryptophan-rich antigen 3 (PArt)	Pf4500-4	-0.224609
144-V05C	BSPZV1-144	2 wks post final dose	675000	Not Protected	PF3D7_0424100.2o2_7908	PF3D7_0424100.2o2	PF3D7_0424100	reticulocyte binding protein homologue 5 (RH5)	Pf4500-4	-0.0102435
144-V05C	BSPZV1-144	2 wks post final dose	675000	Not Protected	PF3D7_1210600.iso1.exon1.amp1_4021	PF3D7_1210600.iso1.exon1.amp1	PF3D7_1210600	conserved Plasmodium protein, unknown function	Pf4000-5	1.76228
144-V05C	BSPZV1-144	2 wks post final dose	675000	Not Protected	PF3D7_1331500.1o1_7911	PF3D7_1331500.1o1	PF3D7_1331500	conserved Plasmodium protein, unknown function	Pf4500-4	0.0905072
144-V05C	BSPZV1-144	2 wks post final dose	675000	Not Protected	PF3D7_0929600.2o2_4963	PF3D7_0929600.2o2	PF3D7_0929600	conserved Plasmodium protein, unknown function	Pf4500-4	-0.125268
144-V05C	BSPZV1-144	2 wks post final dose	675000	Not Protected	PF3D7_1107300.s1_5705	PF3D7_1107300.s1	PF3D7_1107300	polyadenylate-binding protein-interacting protein 1, putative (PAIP1)	Pf4500-4	0.0933984
144-V05C	BSPZV1-144	2 wks post final dose	675000	Not Protected	PF3D7_1428000.1o7_7310	PF3D7_1428000.1o7	PF3D7_1428000	conserved Plasmodium membrane protein, unknown function	Pf4500-4	-0.234998
144-V05C	BSPZV1-144	2 wks post final dose	675000	Not Protected	PF3D7_1440800.1o3_7624	PF3D7_1440800.1o3	PF3D7_1440800	major facilitator superfamily, putative	Pf4500-4	0.0917728
144-V05C	BSPZV1-144	2 wks post final dose	675000	Not Protected	PF3D7_0623500.iso1.exon3.amp1_3215	PF3D7_0623500.iso1.exon3.amp1	PF3D7_0623500	superoxide dismutase	Pf4000-5	0.250707
144-V05C	BSPZV1-144	2 wks post final dose	675000	Not Protected	PF3D7_0524400.e1s1_7190	PF3D7_0524400.e1s1	PF3D7_0524400	cytosolic preribosomal GTP-binding protein, putative	Pf4500-4	0.717187
144-V05C	BSPZV1-144	2 wks post final dose	675000	Not Protected	PF3D7_0721700_4819	PF3D7_0721700	PF3D7_0721700	secreted ookinete protein, putative (PSOP1)	Pf4500-4	0.317646
144-V05C	BSPZV1-144	2 wks post final dose	675000	Not Protected	PF3D7_0819200.1o1_5322	PF3D7_0819200.1o1	PF3D7_0819200	perforin like protein 5 (PPLP5)	Pf4500-4	0.71308
144-V05C	BSPZV1-144	2 wks post final dose	675000	Not Protected	PF3D7_1202300.e22s1_7773	PF3D7_1202300.e22s1	PF3D7_1202300	dynein heavy chain, putative	Pf4500-4	0.0917728
144-V05C	BSPZV1-144	2 wks post final dose	675000	Not Protected	PF3D7_1462600.2o2_9058	PF3D7_1462600.2o2	PF3D7_1462600	conserved Plasmodium membrane protein, unknown function	Pf4500-4	-0.290213
144-V05C	BSPZV1-144	2 wks post final dose	675000	Not Protected	PF3D7_0820000.iso1.exon4.amp2_seg2_1443	PF3D7_0820000.iso1.exon4.amp2_seg2	PF3D7_0820000	Snf2-related CBP activator, putative	Pf4000-5	0.542028
144-V05C	BSPZV1-144	2 wks post final dose	675000	Not Protected	PF3D7_1141200.iso1.exon2.amp1_1483	PF3D7_1141200.iso1.exon2.amp1	PF3D7_1141200	conserved Plasmodium protein, unknown function	Pf4000-5	0.189176
144-V05C	BSPZV1-144	2 wks post final dose	675000	Not Protected	PF3D7_0312900.iso1.exon3.amp1_4157	PF3D7_0312900.iso1.exon3.amp1	PF3D7_0312900	hypothetical protein	Pf4000-5	0.261978
144-V05C	BSPZV1-144	2 wks post final dose	675000	Not Protected	PF3D7_0918900.e1s1_7198	PF3D7_0918900.e1s1	PF3D7_0918900	gamma-glutamylcysteine synthetase (gammaGCS)	Pf4500-4	0.124825
144-V05C	BSPZV1-144	2 wks post final dose	675000	Not Protected	PF3D7_1207000.e3s2_8084	PF3D7_1207000.e3s2	PF3D7_1207000	conserved Plasmodium protein, unknown function	Pf4500-4	0.520972
144-V05C	BSPZV1-144	2 wks post final dose	675000	Not Protected	PF3D7_0726400.e6s1_8651	PF3D7_0726400.e6s1	PF3D7_0726400	conserved Plasmodium membrane protein, unknown function	Pf4500-4	-0.0957438
144-V05C	BSPZV1-144	2 wks post final dose	675000	Not Protected	PF3D7_0700100.iso1.exon2.amp1_seg1_2018	PF3D7_0700100.iso1.exon2.amp1_seg1	PF3D7_0700100	erythrocyte membrane protein 1, PfEMP1	Pf4000-5	0.490255
144-V05C	BSPZV1-144	2 wks post final dose	675000	Not Protected	PF3D7_1408400.e1s1_5466	PF3D7_1408400.e1s1	PF3D7_1408400	DNA-repair helicase, putative	Pf4500-4	0.752367
[truncated: 683,861+ more rows]
