# Supplementary material for: Proteome-wide analysis of a malaria vaccine study reveals personalized humoral immune profiles in Tanzanian adults
Source: eLife. 2020 Jul 14;9:e53080. doi: 10.7554/eLife.53080 (PMC7386907; doi:10.7554/eLife.53080)
Supplement: Figure 3—source data 1. [file elife-53080-fig3-data1.csv]

Total.Dose	Subject.ID	Protection.3.wk	is_seropositive	breadth_signal_before	breadth_signal_after
0	BSPZV1-054	Not Protected	1	1661	1335
0	BSPZV1-160	Not Protected	1	187	146
0	BSPZV1-240	Not Protected	1	884	837
0	BSPZV1-253	Not Protected	1	629	592
0	BSPZV1-290	Not Protected	1	289	331
0	BSPZV1-360	Not Protected	1	1927	438
0	BSPZV1-430	Not Protected	1	482	615
0	BSPZV1-500	Not Protected	1	605	583
1350000	BSPZV1-281	Not Protected	1	728	672
1350000	BSPZV1-306	Not Protected	1	368	323
1350000	BSPZV1-310	Not Protected	1	486	562
1350000	BSPZV1-325	Not Protected	1	1082	1245
1350000	BSPZV1-335	Not Protected	1	350	289
1350000	BSPZV1-345	Not Protected	1	548	637
1350000	BSPZV1-351	Protected	1	765	993
1350000	BSPZV1-377	Not Protected	1	520	538
1350000	BSPZV1-383	Not Protected	1	709	667
1350000	BSPZV1-397	Not Protected	1	1837	1965
1350000	BSPZV1-401	Not Protected	1	750	683
1350000	BSPZV1-411	Protected	1	504	691
1350000	BSPZV1-420	Not Protected	1	782	873
1350000	BSPZV1-445	Protected	1	1037	1026
1350000	BSPZV1-453	Protected	1	1265	938
1350000	BSPZV1-469	Not Protected	1	713	714
1350000	BSPZV1-473	Not Protected	1	369	340
1350000	BSPZV1-489	Not Protected	1	516	562
1350000	BSPZV1-495	Not Protected	1	1337	1393
1350000	BSPZV1-512	Not Protected	1	1255	1331
675000	BSPZV1-048	Not Protected	1	256	250
675000	BSPZV1-067	Not Protected	1	997	1225
675000	BSPZV1-078	Protected	1	1003	1067
675000	BSPZV1-087	Not Protected	1	233	269
675000	BSPZV1-093	Not Protected	1	1043	1160
675000	BSPZV1-104	Not Protected	1	1309	741
675000	BSPZV1-117	Not Protected	1	2360	902
675000	BSPZV1-126	Not Protected	1	295	285
675000	BSPZV1-139	Not Protected	1	641	573
675000	BSPZV1-144	Not Protected	1	757	631
675000	BSPZV1-156	Not Protected	1	240	217
675000	BSPZV1-179	Not Protected	1	652	392
675000	BSPZV1-198	Not Protected	1	582	588
675000	BSPZV1-205	Not Protected	1	1408	1331
675000	BSPZV1-218	Not Protected	1	299	301
675000	BSPZV1-228	Not Protected	1	1766	1535
675000	BSPZV1-239	Not Protected	1	643	533
675000	BSPZV1-274	Not Protected	1	931	629
