# Supplementary material for: Proteome-wide analysis of a malaria vaccine study reveals personalized humoral immune profiles in Tanzanian adults
Source: eLife. 2020 Jul 14;9:e53080. doi: 10.7554/eLife.53080 (PMC7386907; doi:10.7554/eLife.53080)
Supplement: Figure 3—source data 2. — An estimated effect of immunization on breadth and corresponding p-value performing the inverted beta-binomial test for paired count data using sample at basdeline and after immunization are shown in A, together with the mean and median breadth for each group at baseline and after immunization, and for the protected and unprotected group. (B) indicates the estimated regression coefficient and corresponding p values of the negative binomial regression to test differences in breadth between two groups at either baseline or after immunization. [file elife-53080-fig3-data2.xlsx]

## Sheet: Sheet1
Different increase after versus before immunization, inverted beta-binomial test for paired count data
		Group	Mean Post-Immz Breadth	Mean Baseline Breadth	Median Post-Immz Breadth	Median Baseline Breadth	P value	Fold Change
		control	609.625	833	587.5	617	0.235347	-1.22659
		group 1	701.611	856.389	608.5	704.5	0.0318268	-1.16361
		group 2	822.1	796.05	687	720.5	0.432188	1.02576
		unprotected	738.061	810.97	631	709	0.0615267	-1.08181
		protected	943	914.8	993	1003	0.522528	1.06509
Difference in breadth between groups, negative binomial regression
	Time Point	Group	Mean Breadth (a)	Mean Breadth (b)	Median Breadth (a)	Median Breadth (b)	Pvalue	Regression Coefficient	Std Error
	Baseline	control (a) versus group 1 (b)	833	856.389	617	704.5	0.921664	0.0276909	0.281589
	Post-Immz	control (a) versus group 1 (b)	609.625	701.611	587.5	608.5	0.563326	0.140535	0.243179
	Baseline	control (a) versus group 2 (b)	609.625	822.1	587.5	687	0.153029	0.299018	0.209262
	Post-Immz	control (a) versus group 2 (b)	609.625	822.1	587.5	687	0.153029	0.299018	0.209262
	Post-Immz	group 1 (a) versus group 2 (b)	701.611	822.1	608.5	687	0.352458	0.158483	0.170442
	Baseline	unprotected (a) versus protected (b)	810.97	914.8	709	1003	0.650556	0.120475	0.265955
	Post-Immz	unprotected (a) versus protected (b)	738.061	943	631	993	0.32935	0.24504	0.251214
Different increase after versus before immunization, inverted beta-binomial test for paired count data
		Group	Mean Post-Immz Breadth	Mean Baseline Breadth	Median Post-Immz Breadth	Median Baseline Breadth	P value	Fold Change
		control	609	833	587	617	0.235347	-1.22659
		group 1	701	856	608	704	0.0318268	-1.16361
		group 2	822	796	687	720	0.432188	1.02576
		unprotected	738	810	631	709	0.0615267	-1.08181
		protected	943	914	993	1003	0.522528	1.06509
Difference in breadth between groups, negative binomial regression
	Time Point	Group	Mean Breadth (a)	Mean Breadth (b)	Median Breadth (a)	Median Breadth (b)	Pvalue	Regression Coefficient	Std Error
	Baseline	control (a) versus group 1 (b)	833	856	617	704	0.921664	0.0276909	0.281589
	Post-Immz	control (a) versus group 1 (b)	609	701	587	608	0.563326	0.140535	0.243179
	Baseline	control (a) versus group 2 (b)	609	822	587	687	0.153029	0.299018	0.209262
	Post-Immz	control (a) versus group 2 (b)	609	822	587	687	0.153029	0.299018	0.209262
	Post-Immz	group 1 (a) versus group 2 (b)	701	822	608	687	0.352458	0.158483	0.170442
	Baseline	unprotected (a) versus protected (b)	810	914	709	1003	0.650556	0.120475	0.265955
	Post-Immz	unprotected (a) versus protected (b)	738	943	631	993	0.32935	0.24504	0.251214
