# Supplementary material for: Proteome-wide analysis of a malaria vaccine study reveals personalized humoral immune profiles in Tanzanian adults
Source: eLife. 2020 Jul 14;9:e53080. doi: 10.7554/eLife.53080 (PMC7386907; doi:10.7554/eLife.53080)
Supplement: Figure 4—figure supplement 2—source data 1. [file elife-53080-fig4-figsupp2-data1.csv]

DELTA control versus group 2
	protein_ID	mean_seorpositivy_group1	mean_seorpositivy_group2	log_FC	p_value	adj.p_value	is_threshold_reached
1	MAL13P1.303e4s1_6254	-0.295658672	-0.064598047	0.231060625	0.243807403	0.99984053	FALSE
2	MAL8P1.143_14o15_5934	-0.071272813	-0.170852698	-0.099579885	0.387608836	0.99984053	FALSE
3	MAL8P1.143_3o15_6506	-0.106430778	-0.127657024	-0.021226246	0.881790225	0.99984053	FALSE
4	PF3D7_0100100.iso1.exon2.amp1_1871	-0.270596263	-0.222623658	0.047972605	0.839300803	0.99984053	FALSE
5	PF3D7_0100200.iso1.exon1.amp1_706	-0.263608985	-0.267439836	-0.003830851	0.988730377	0.99984053	FALSE
6	PF3D7_0100300.iso1.exon1.amp1_1010	-0.171572909	-0.125516106	0.046056803	0.797619091	0.99984053	FALSE
7	PF3D7_0100300.iso1.exon2.amp1_1317	-0.093700167	-0.103638074	-0.009937907	0.899754771	0.99984053	FALSE
8	PF3D7_0100400.iso1.exon2.amp1_991	-0.296824269	-0.231319617	0.065504652	0.825297919	0.99984053	FALSE
9	PF3D7_0100600.iso1.exon1.amp1_2163	-0.19712979	-0.182304394	0.014825396	0.956025734	0.99984053	FALSE
10	PF3D7_0100800.iso1.exon2.amp1_133	-0.100656314	-0.201965478	-0.101309164	0.620025262	0.99984053	FALSE
11	PF3D7_0100900.iso1.exon1.amp1_2446	-0.013389182	-0.290617862	-0.277228681	0.186173661	0.99984053	FALSE
12	PF3D7_0101000.iso1.exon1.amp1_2157	-0.249377139	-0.157675042	0.091702097	0.670217282	0.99984053	FALSE
13	PF3D7_0101100.iso1.exon1.amp1_3004	-0.116591629	-0.117125326	-0.000533696	0.995656452	0.99984053	FALSE
14	PF3D7_0101300.iso1.exon2.amp1_4146	-0.316089482	-0.273743254	0.042346228	0.868295691	0.99984053	FALSE
15	PF3D7_0101600.iso1.exon1.amp1_3887	-0.164023409	0.10946656	0.273489969	0.08552937	0.99984053	FALSE
16	PF3D7_0101800.iso1.exon1.amp1_2719	-0.197107234	-0.211979557	-0.014872323	0.937713175	0.99984053	FALSE
17	PF3D7_0101900.iso1.exon1.amp1_123	-0.077299346	-0.180748299	-0.103448953	0.64366295	0.99984053	FALSE
18	PF3D7_0102200.e1s1_8021	-0.225717472	-0.084900477	0.140816995	0.478890131	0.99984053	FALSE
19	PF3D7_0102200.e2s1_7477	-0.193038057	0.012225368	0.205263425	0.254964004	0.99984053	FALSE
20	PF3D7_0102200.e2s2_7188	-0.143087355	-0.006474993	0.136612362	0.466334218	0.99984053	FALSE
21	PF3D7_0102500.e1s2_8945	-0.165189362	-0.069785861	0.095403501	0.650654671	0.99984053	FALSE
22	PF3D7_0102600.2o3_6170	-0.095717681	-0.065989664	0.029728017	0.828186078	0.99984053	FALSE
23	PF3D7_0102700.2o2_7571	-0.122304087	-0.240836643	-0.118532556	0.627008814	0.99984053	FALSE
24	PF3D7_0103400.e1s1_5925	-0.074796254	-0.084519278	-0.009723023	0.931090584	0.99984053	FALSE
25	PF3D7_0103500.2o7_7085	-0.199943557	-0.075037119	0.124906438	0.449663366	0.99984053	FALSE
26	PF3D7_0103800.e4s1_7155	-0.212861441	-0.186900076	0.025961365	0.922934893	0.99984053	FALSE
27	PF3D7_0103900.1o1_9076	-0.153343029	0.041466034	0.194809063	0.441933453	0.99984053	FALSE
28	PF3D7_0104000.3o3_6106	-0.191087033	-0.106064015	0.085023018	0.605955329	0.99984053	FALSE
29	PF3D7_0104100.1o2_5053	-0.097277191	-0.110304515	-0.013027324	0.932840337	0.99984053	FALSE
30	PF3D7_0104100.2o2_5342	-0.074912876	0.153513116	0.228425991	0.242245829	0.99984053	FALSE
31	PF3D7_0104600.e1s1_7213	0.012432993	-0.037416304	-0.049849297	0.632764521	0.99984053	FALSE
32	PF3D7_0105600.e2_4833	-0.052207012	-0.05194587	0.000261142	0.997379353	0.99984053	FALSE
33	PF3D7_0105700.iso1.exon1.amp2_233	-0.047979027	-0.076248117	-0.02826909	0.742959245	0.99984053	FALSE
34	PF3D7_0105700.iso1.exon1.amp3_522	-0.112408158	-0.106871796	0.005536362	0.959337222	0.99984053	FALSE
35	PF3D7_0105900.iso1.exon1.amp1_short_2005	-0.18066461	-0.067331588	0.113333022	0.523050308	0.99984053	FALSE
36	PF3D7_0106200.iso1.exon1.amp1_3577	0.003091291	-0.061030207	-0.064121497	0.542194273	0.99984053	FALSE
37	PF3D7_0106500.iso1.exon1.amp1_2562	-0.105535642	-0.121709764	-0.016174122	0.904321715	0.99984053	FALSE
38	PF3D7_0107900.iso1.exon1.amp1_696	-0.158367967	-0.094673038	0.063694929	0.60188095	0.99984053	FALSE
39	PF3D7_0108000.e1s1_7463	-0.278249367	-0.126184462	0.152064905	0.56212211	0.99984053	FALSE
40	PF3D7_0108300.s1_7972	-0.271182654	-0.33993773	-0.068755076	0.873496594	0.99984053	FALSE
41	PF3D7_0108300.s2_7111	-0.167718527	-0.294599782	-0.126881255	0.59606887	0.99984053	FALSE
42	PF3D7_0108300.s3_7689	-0.36384446	-0.183023853	0.180820607	0.549688538	0.99984053	FALSE
43	PF3D7_0108400.iso1.exon1.amp1_short_3733	-0.250578792	-0.133962038	0.116616755	0.603139371	0.99984053	FALSE
44	PF3D7_0108400.iso1.exon7.amp1_45	-0.130377349	-0.087905633	0.042471717	0.733254069	0.99984053	FALSE
45	PF3D7_0108600.iso1.exon4.amp1_4380	-0.277242652	-0.12000394	0.157238713	0.455375922	0.99984053	FALSE
46	PF3D7_0108600.iso1.exon5.amp1_634	-0.117457096	-0.027163762	0.090293334	0.106437992	0.99984053	FALSE
47	PF3D7_0108700.e1s1_7776	-0.01491588	-0.172219584	-0.157303705	0.404770221	0.99984053	FALSE
48	PF3D7_0108800.iso1.exon6.amp1_1233	-0.128769594	-0.120976543	0.007793051	0.947056929	0.99984053	FALSE
49	PF3D7_0109200.iso1.exon1.amp1_2413	-0.184333234	-0.071396913	0.112936321	0.507624372	0.99984053	FALSE
50	PF3D7_0109800.1o1_7336	-0.167596376	-0.079602607	0.087993768	0.513349403	0.99984053	FALSE
51	PF3D7_0109900.iso2.exon16.amp1_324	-0.227307855	-0.183820789	0.043487066	0.853380189	0.99984053	FALSE
52	PF3D7_0110000.1o1_8428	-0.158060319	-0.092231588	0.065828731	0.717003229	0.99984053	FALSE
53	PF3D7_0110500.e1s2_5766	-0.045671534	0.06112541	0.106796943	0.474895893	0.99984053	FALSE
54	PF3D7_0110500.e1s3_5188	-0.054135957	-0.105414602	-0.051278645	0.694526515	0.99984053	FALSE
55	PF3D7_0110600.e1s1_6533	-0.180945865	-0.248183026	-0.067237161	0.808776031	0.99984053	FALSE
56	PF3D7_0110600.e3_5665	-0.073604443	2.61E-05	0.073630529	0.708435198	0.99984053	FALSE
57	PF3D7_0110700.e1s1_7186	-0.08962817	-0.085543164	0.004085006	0.975312493	0.99984053	FALSE
58	PF3D7_0110800.iso1.exon3.amp1_2717	0.033603674	-0.110736129	-0.144339803	0.459675002	0.99984053	FALSE
59	PF3D7_0111000.e1s2_6049	-0.089437221	-0.136623671	-0.04718645	0.822891217	0.99984053	FALSE
60	PF3D7_0111000.e5s1_5681	-0.116888982	-0.068458478	0.048430504	0.795443566	0.99984053	FALSE
61	PF3D7_0111300.iso1.exon1.amp1_1701	-0.138151746	-0.153328879	-0.015177132	0.892547575	0.99984053	FALSE
62	PF3D7_0111500.e4s1_8619	-0.134456856	-0.182486214	-0.048029358	0.827560605	0.99984053	FALSE
63	PF3D7_0111500.e5s1_5099	-0.157884	-0.087903951	0.069980049	0.729130763	0.99984053	FALSE
64	PF3D7_0111700.iso1.exon1.amp1_961	-0.109733542	-0.085917463	0.023816079	0.870413463	0.99984053	FALSE
65	PF3D7_0112000.3o4_5862	-0.232975293	-0.173420917	0.059554376	0.80910756	0.99984053	FALSE
66	PF3D7_0112100.1o1_6684	-0.16259203	0.018877139	0.181469169	0.379153986	0.99984053	FALSE
67	PF3D7_0112200.iso1.exon1.amp2_183	-0.171740111	-0.225880314	-0.054140203	0.764272633	0.99984053	FALSE
68	PF3D7_0113100.iso1.exon1.amp1_4475	-0.178878237	-0.053367626	0.125510611	0.39166025	0.99984053	FALSE
69	PF3D7_0113100.iso1.exon2.amp1_4270	-0.204960195	-0.104901289	0.100058905	0.530466778	0.99984053	FALSE
70	PF3D7_0113100.iso1.exon2.amp2_3349	-0.114884938	-0.052208074	0.062676864	0.612592206	0.99984053	FALSE
71	PF3D7_0113300.2o2_5313	0.014593945	-0.153621037	-0.168214982	0.111726723	0.99984053	FALSE
72	PF3D7_0113400.2o2_8752	-0.075411743	-0.009078853	0.06633289	0.65523537	0.99984053	FALSE
73	PF3D7_0113800.2o4_7664	-0.16246194	-0.04843475	0.11402719	0.543550749	0.99984053	FALSE
74	PF3D7_0113800.3o4_7092	-0.291312089	-0.084212105	0.207099984	0.456039306	0.99984053	FALSE
75	PF3D7_0113900.2o2_5532	-0.317613131	-0.086119282	0.231493849	0.500613179	0.99984053	FALSE
76	PF3D7_0114000.e2s2_8371	-0.038949622	0.013919311	0.052868933	0.663964344	0.99984053	FALSE
77	PF3D7_0114100.iso1.exon1.amp1_2718	-0.067536246	-0.224377826	-0.15684158	0.417652137	0.99984053	FALSE
78	PF3D7_0115000.e1s1_6895	-0.103174222	-0.041638043	0.06153618	0.631770859	0.99984053	FALSE
79	PF3D7_0115200.iso1.exon2.amp1_719	-0.283824426	-0.222787848	0.061036578	0.784099609	0.99984053	FALSE
80	PF3D7_0115300.iso1.exon2.amp1_1279	-0.158741016	-0.07851867	0.080222346	0.629780598	0.99984053	FALSE
81	PF3D7_0115400.iso1.exon2.amp1_2714	-0.280229277	-0.358320979	-0.078091702	0.776412184	0.99984053	FALSE
82	PF3D7_0115700.iso1.exon1.amp1_1583	-0.185416274	-0.377939929	-0.192523654	0.486046933	0.99984053	FALSE
83	PF3D7_0115700.iso1.exon2.amp2_4262	-0.167550143	-0.139565315	0.027984828	0.809118694	0.99984053	FALSE
84	PF3D7_0200100 (renamed)_4770	-0.163293623	-0.225930237	-0.062636615	0.756946397	0.99984053	FALSE
85	PF3D7_0200100.iso1.exon2.amp1_2746	-0.043199601	-0.216099731	-0.17290013	0.273694849	0.99984053	FALSE
86	PF3D7_0200200.iso1.exon1.amp1_1284	-0.296701539	-0.244530507	0.052171032	0.819874122	0.99984053	FALSE
87	PF3D7_0200400.iso1.exon1.amp1_1275	-0.141352815	-0.33720509	-0.195852275	0.456500865	0.99984053	FALSE
88	PF3D7_0200500.iso1.exon1.amp1_3303	-0.463872888	-0.342747708	0.121125181	0.690038596	0.99984053	FALSE
89	PF3D7_0200600.iso1.exon1.amp1_2442	-0.3527576	-0.243677179	0.109080421	0.720887557	0.99984053	FALSE
90	PF3D7_0200700.iso1.exon1.amp1_700	-0.223675786	-0.20689748	0.016778306	0.923131032	0.99984053	FALSE
91	PF3D7_0200800.iso1.exon3.amp1_406	-0.230362954	-0.21195816	0.018404794	0.939685767	0.99984053	FALSE
92	PF3D7_0201000.iso1.exon1.amp1_3595	-0.079011067	-0.089731028	-0.010719961	0.940000366	0.99984053	FALSE
93	PF3D7_0201200.iso1.exon2.amp1_3603	-0.111827881	-0.226570792	-0.114742911	0.584077412	0.99984053	FALSE
94	PF3D7_0201300.iso1.exon2.amp1_119	-0.306949812	-0.283257623	0.023692189	0.936280273	0.99984053	FALSE
95	PF3D7_0201500.2o2_5533	0.032724701	-0.084280613	-0.117005314	0.297581653	0.99984053	FALSE
96	PF3D7_0201700.2o2_8813	-0.069847778	-0.163153667	-0.09330589	0.416845087	0.99984053	FALSE
97	PF3D7_0201800.iso1.exon1.amp1_4451	-0.184331339	-0.040184665	0.144146673	0.059808612	0.99984053	FALSE
98	PF3D7_0201800.iso1.exon2.amp1_3566	-0.133351518	0.004366888	0.137718406	0.248014398	0.99984053	FALSE
99	PF3D7_0201900.e2s1_5490	-0.060682098	0.01910339	0.079785488	0.455145338	0.99984053	FALSE
100	PF3D7_0202000.e2s1_8364	-0.32513995	-0.194584677	0.130555274	0.615504394	0.99984053	FALSE
101	PF3D7_0202300.2o2_8437	-0.115606284	0.088189779	0.203796064	0.420002947	0.99984053	FALSE
102	PF3D7_0202400.e1s1_5756	-0.010531155	-0.043145943	-0.032614788	0.704329001	0.99984053	FALSE
103	PF3D7_0202500.1o1_7250	-0.129098648	-0.01081284	0.118285808	0.518098428	0.99984053	FALSE
104	PF3D7_0202600.iso2.exon1.amp1_2518	-0.046658088	-0.071430305	-0.024772218	0.845425133	0.99984053	FALSE
105	PF3D7_0202700.iso1.exon1.amp1_2186	-0.13411921	-0.098595273	0.035523938	0.781709784	0.99984053	FALSE
106	PF3D7_0203000.iso1.exon1.amp1_538	-0.112725574	-0.133345127	-0.020619553	0.843176097	0.99984053	FALSE
107	PF3D7_0203000.iso1.exon1.amp2_1055	-0.10140257	-0.022760174	0.078642396	0.552372144	0.99984053	FALSE
108	PF3D7_0203100.e1s1_6609	-0.127750481	-0.082757641	0.04499284	0.782383026	0.99984053	FALSE
109	PF3D7_0203100.e2s2_7084	-0.001882128	-0.053993396	-0.052111268	0.594052279	0.99984053	FALSE
110	PF3D7_0203100.e2s3_5060	-0.222568155	-0.14578685	0.076781305	0.805707485	0.99984053	FALSE
111	PF3D7_0203200.1o1_5016	-0.176696328	-0.073704833	0.102991495	0.555850893	0.99984053	FALSE
112	PF3D7_0203800.iso1.exon12.amp1_2119	-0.13493508	-0.09354453	0.041390551	0.770969957	0.99984053	FALSE
113	PF3D7_0204100.iso1.exon1.amp1_247	-0.035992038	-0.078329218	-0.04233718	0.650974176	0.99984053	FALSE
114	PF3D7_0204100.iso1.exon1.amp2_536	-0.103081584	-0.066243013	0.036838572	0.68320769	0.99984053	FALSE
115	PF3D7_0204100.iso1.exon1.amp3_476	-0.017189344	0.068884143	0.086073487	0.609518869	0.99984053	FALSE
116	PF3D7_0204300.1o1_4751	-0.123260185	0.059595511	0.182855696	0.214805637	0.99984053	FALSE
117	PF3D7_0204500.1o1_5582	-0.302571893	-0.164111425	0.138460469	0.569820481	0.99984053	FALSE
118	PF3D7_0204600.iso1.exon1.amp2_seg2_1153	-0.231124371	-0.068703666	0.162420704	0.321807092	0.99984053	FALSE
119	PF3D7_0204800.iso1.exon1.amp1_3895	-0.098340368	-0.126376099	-0.028035731	0.772488684	0.99984053	FALSE
120	PF3D7_0206000.s2_8261	-0.032357524	-0.107580047	-0.075222522	0.602387562	0.99984053	FALSE
121	PF3D7_0206100.1o4_7281	-0.276837532	-0.065913466	0.210924066	0.543227292	0.99984053	FALSE
122	PF3D7_0206200.1o1_7052	-0.025530643	-0.142331181	-0.116800538	0.395184539	0.99984053	FALSE
123	PF3D7_0206800_8292	0.01871246	0.030919809	0.012207349	0.939876446	0.99984053	FALSE
124	PF3D7_0206900.1.1o2_4674	-0.222529929	0.099600217	0.322130146	0.171387476	0.99984053	FALSE
125	PF3D7_0206900.1.2o2_5836	-0.124946993	-0.100773177	0.024173816	0.883907683	0.99984053	FALSE
126	PF3D7_0206900.1.e1_8561	-0.261939043	0.008616364	0.270555406	0.112853042	0.99984053	FALSE
127	PF3D7_0207000.1o2_6703	-0.138827719	0.118009012	0.256836731	0.448775219	0.99984053	FALSE
128	PF3D7_0207000.2o2_6414	-0.117477454	0.043808277	0.161285731	0.455151548	0.99984053	FALSE
129	PF3D7_0207000.e1_7116	-0.227537627	0.126382724	0.353920351	0.303071214	0.99984053	FALSE
130	PF3D7_0207100.s1_9173	-0.046538243	-0.038882323	0.00765592	0.930419519	0.99984053	FALSE
131	PF3D7_0207200_6262	-0.274858853	-0.091782048	0.183076804	0.393465544	0.99984053	FALSE
132	PF3D7_0207300.iso1.exon2.amp1_4172	-0.223511857	-0.014505265	0.209006592	0.101925972	0.99984053	FALSE
133	PF3D7_0207300.iso1.exon5.amp1_1780	-0.209811989	-0.087103951	0.122708038	0.503796861	0.99984053	FALSE
134	PF3D7_0207400.4o4_5635	-0.003685551	-0.031999118	-0.028313566	0.711339998	0.99984053	FALSE
135	PF3D7_0207500.e1s1_8609	-0.459013726	-0.165675664	0.293338062	0.37225121	0.99984053	FALSE
136	PF3D7_0207500.e3s1_8088	-0.130055433	-0.179784267	-0.049728834	0.760903158	0.99984053	FALSE
137	PF3D7_0207600.e2s1_8341	-0.14482595	-0.160511411	-0.015685461	0.922603733	0.99984053	FALSE
138	PF3D7_0207600.e4s1_8076	-0.373157066	-0.15735024	0.215806826	0.483035037	0.99984053	FALSE
139	PF3D7_0207700.2o4_5642	-0.142893944	-0.165028392	-0.022134448	0.941319304	0.99984053	FALSE
140	PF3D7_0207700.4o4_8238	0.01933072	-0.067423511	-0.086754232	0.518760146	0.99984053	FALSE
141	PF3D7_0208000.4o4_7083	-0.068737574	-0.064771529	0.003966045	0.965805608	0.99984053	FALSE
142	PF3D7_0208100.iso2.exon10.amp1_1520	-0.299924865	0.047427476	0.347352341	0.180450899	0.99984053	FALSE
143	PF3D7_0208100.iso2.exon13.amp1_3822	-0.188322429	-0.154868403	0.033454026	0.85680046	0.99984053	FALSE
144	PF3D7_0208700.iso2.exon4.amp1_1767	-0.277920277	-0.116715089	0.161205188	0.503910527	0.99984053	FALSE
145	PF3D7_0208900.e1s3_5063	-0.222920158	-0.105190107	0.117730051	0.637007951	0.99984053	FALSE
146	PF3D7_0209100.2o3_8219	-0.173119531	0.043093736	0.216213267	0.218125109	0.99984053	FALSE
147	PF3D7_0209300.1o2_6694	-0.139182566	-0.049055743	0.090126823	0.63875521	0.99984053	FALSE
148	PF3D7_0209400.2o7_8465	-0.246502565	-0.105970743	0.140531823	0.634680861	0.99984053	FALSE
149	PF3D7_0209800.e2_6830	-0.148225502	-0.085317183	0.062908318	0.775441776	0.99984053	FALSE
150	PF3D7_0210200.iso1.exon2.amp2_seg1_2597	-0.22539194	-0.202190968	0.023200971	0.948377436	0.99984053	FALSE
151	PF3D7_0210300.e2_9137	-0.349476076	0.029800441	0.379276517	0.198985679	0.99984053	FALSE
152	PF3D7_0210600.3o5_4701	-0.097247558	-0.096852883	0.000394675	0.997811403	0.99984053	FALSE
153	PF3D7_0210700.1o1_6705	-0.043017116	-0.092135699	-0.049118583	0.655208113	0.99984053	FALSE
154	PF3D7_0211100.iso1.exon1.amp1_3153	-0.070919708	-0.003141151	0.067778557	0.592711832	0.99984053	FALSE
155	PF3D7_0211100.iso1.exon1.amp2_1349	0.036914487	0.001080077	-0.03583441	0.779511968	0.99984053	FALSE
156	PF3D7_0211200.1o1_7850	-0.067048461	-0.107873942	-0.040825481	0.804586819	0.99984053	FALSE
157	PF3D7_0211300.iso1.exon2.amp1_77	-0.136893302	-0.045996126	0.090897176	0.299212912	0.99984053	FALSE
158	PF3D7_0211900.iso1.exon1.amp1_2450	-0.223383071	-0.11399121	0.109391861	0.478805364	0.99984053	FALSE
159	PF3D7_0212200.iso1.exon2.amp1_4153	-0.180659645	-0.118598404	0.062061241	0.715981153	0.99984053	FALSE
160	PF3D7_0212300.e3s1_4883	-0.126514986	-0.007500751	0.119014235	0.326593624	0.99984053	FALSE
161	PF3D7_0212400.3o3_6803	-0.128494203	0.006837954	0.135332158	0.320088504	0.99984053	FALSE
162	PF3D7_0212500.iso1.exon1.amp1_3098	-0.056971781	-0.019430197	0.037541585	0.46572028	0.99984053	FALSE
163	PF3D7_0212700.1o1_4996	-0.322579205	0.011703742	0.334282948	0.244760113	0.99984053	FALSE
164	PF3D7_0212900.1o1_9032	-0.26563437	-0.09817486	0.16745951	0.305851413	0.99984053	FALSE
165	PF3D7_0213000.1o1_4661	-0.234998943	-0.08374558	0.151253363	0.580937818	0.99984053	FALSE
166	PF3D7_0213400.iso1.exon2.amp1_388	-0.087337903	-0.047544415	0.039793487	0.794233477	0.99984053	FALSE
167	PF3D7_0213400.iso1.exon3.amp1_84	-0.275809353	-0.154989625	0.120819728	0.629977322	0.99984053	FALSE
168	PF3D7_0213500.iso1.exon3.amp1_4447	-0.139320177	-0.097963294	0.041356883	0.756144249	0.99984053	FALSE
169	PF3D7_0213900.iso1.exon1.amp2_1348	-0.114371673	-0.083806346	0.030565327	0.753692721	0.99984053	FALSE
170	PF3D7_0214100.e1s1_6246	-0.279472426	-0.290522899	-0.011050472	0.967514543	0.99984053	FALSE
171	PF3D7_0214300.iso1.exon1.amp1_2559	0.001643433	-0.130087094	-0.131730527	0.329719631	0.99984053	FALSE
172	PF3D7_0214300.iso1.exon1.amp2_2848	-0.185659758	0.021979331	0.207639089	0.200394103	0.99984053	FALSE
173	PF3D7_0215700.e2s2_6920	-0.179414201	-0.238003854	-0.058589653	0.770228004	0.99984053	FALSE
174	PF3D7_0216400.1o1_7065	-0.180448153	-0.171402341	0.009045812	0.968123565	0.99984053	FALSE
175	PF3D7_0216700.1.6o7_7390	-0.161278661	-0.124004915	0.037273746	0.753000925	0.99984053	FALSE
176	PF3D7_0216700.iso2.exon6.amp1_679	-0.345654394	-0.176817167	0.168837227	0.492069539	0.99984053	FALSE
177	PF3D7_0216900.1o1_7051	-0.220858789	-0.1209924	0.099866389	0.506378717	0.99984053	FALSE
178	PF3D7_0217400.2o2_6962	0.198868641	-0.190956325	-0.389824966	0.301048966	0.99984053	FALSE
179	PF3D7_0217700.iso1.exon1.amp1_3848	-0.288576623	-0.179223388	0.109353234	0.622269557	0.99984053	FALSE
180	PF3D7_0217900.e1s1_7766	-0.132510751	0.024753334	0.157264085	0.372914117	0.99984053	FALSE
181	PF3D7_0218300.1o4_6226	-0.168451242	-0.125282862	0.04316838	0.832315527	0.99984053	FALSE
182	PF3D7_0218300.2o4_6804	-0.025449608	-0.070693488	-0.04524388	0.628919586	0.99984053	FALSE
183	PF3D7_0218300.e2_6243	-0.055306899	-0.069192468	-0.013885569	0.890211335	0.99984053	FALSE
184	PF3D7_0219300.1o1_5228	-0.028692897	0.009076759	0.037769656	0.800306046	0.99984053	FALSE
185	PF3D7_0219400.iso1.exon2.amp1_1777	-0.118880593	0.022048607	0.1409292	0.617543584	0.99984053	FALSE
186	PF3D7_0219600.e1s1_8817	-0.075916349	-0.020278629	0.05563772	0.68098026	0.99984053	FALSE
187	PF3D7_0219700.2o2_6131	-0.141276596	-0.130924789	0.010351807	0.965917741	0.99984053	FALSE
188	PF3D7_0219900.2o2_6693	-0.13799901	-0.169741019	-0.031742009	0.898657167	0.99984053	FALSE
189	PF3D7_0220000.e2s1_7105	0.128428578	0.09439069	-0.034037888	0.83757714	0.99984053	FALSE
190	PF3D7_0220000.e2s2_7394	-0.347873335	-0.002582531	0.345290804	0.384837359	0.99984053	FALSE
191	PF3D7_0220100.e2s1_7661	-0.156721256	-0.133079037	0.023642219	0.867169265	0.99984053	FALSE
192	PF3D7_0220600.2o2_6976	-0.128034315	-0.031802059	0.096232256	0.473477676	0.99984053	FALSE
193	PF3D7_0221400.iso1.exon2.amp1_3871	-0.135333468	-0.120810553	0.014522916	0.915177934	0.99984053	FALSE
194	PF3D7_0221600.1o1_5812	-0.32542991	-0.22162888	0.10380103	0.787384357	0.99984053	FALSE
195	PF3D7_0222000.iso1.exon1.amp1_691	-0.061240782	-0.199669952	-0.13842917	0.283199969	0.99984053	FALSE
196	PF3D7_0222100.iso1.exon1.amp1_3007	-0.294733287	-0.214734235	0.079999052	0.675626871	0.99984053	FALSE
197	PF3D7_0222500.iso1.exon2.amp1_987	-0.203494005	-0.207023837	-0.003529831	0.990575614	0.99984053	FALSE
198	PF3D7_0222600.iso1.exon2.amp1_1008	-0.100210219	-0.232223157	-0.132012938	0.566740381	0.99984053	FALSE
199	PF3D7_0222700.iso1.exon2.amp1_1289	-0.185214423	-0.153168947	0.032045477	0.8539732	0.99984053	FALSE
200	PF3D7_0222800.iso1.exon2.amp1_1564	-0.301073487	-0.348102233	-0.047028745	0.87688903	0.99984053	FALSE
201	PF3D7_0222900.1o1_4649	-0.103977663	-0.077569608	0.026408055	0.870599914	0.99984053	FALSE
202	PF3D7_0223100.iso1.exon2.amp1_989	-0.204618423	-0.206130029	-0.001511606	0.993326565	0.99984053	FALSE
203	PF3D7_0223200.iso1.exon2.amp1_3607	-0.086367852	-0.226543783	-0.140175931	0.46867681	0.99984053	FALSE
204	PF3D7_0223300 (renamed)_6619	-0.119392687	-0.130700629	-0.011307942	0.937206809	0.99984053	FALSE
205	PF3D7_0223300.iso1.exon2.amp1_3611	-0.011945632	-0.037580463	-0.025634831	0.900553278	0.99984053	FALSE
206	PF3D7_0223400.iso1.exon2.amp1_1856	-0.214417577	-0.158919074	0.055498503	0.79576342	0.99984053	FALSE
207	PF3D7_0223500.iso1.exon1.amp1_3027	-0.067814011	-0.187421745	-0.119607734	0.412048059	0.99984053	FALSE
208	PF3D7_0223500.iso1.exon2.amp1_4551	-0.179231341	-0.072009677	0.107221664	0.381107372	0.99984053	FALSE
209	PF3D7_0300100.iso1.exon2.amp1_138	0.039439229	-0.286856286	-0.326295516	0.106439737	0.99984053	FALSE
210	PF3D7_0300200.iso1.exon1.amp1_3012	-0.213338143	-0.328647734	-0.115309591	0.710070555	0.99984053	FALSE
211	PF3D7_0300400.iso1.exon1.amp1_401	-0.32307281	-0.308640834	0.014431976	0.956428509	0.99984053	FALSE
212	PF3D7_0300500.iso1.exon1.amp1_134	-0.24832065	-0.176894972	0.071425678	0.779687286	0.99984053	FALSE
213	PF3D7_0300700.iso1.exon2.amp1_3592	-0.252638555	-0.179220257	0.073418299	0.722144196	0.99984053	FALSE
214	PF3D7_0300800.iso1.exon2.amp1_1572	-0.091440636	-0.156451887	-0.06501125	0.496833271	0.99984053	FALSE
215	PF3D7_0300900.iso1.exon2.amp1_1555	-0.086716469	-0.038100676	0.048615793	0.559765437	0.99984053	FALSE
216	PF3D7_0301100.2o2_9008	-0.005817147	-0.018727434	-0.012910287	0.933142974	0.99984053	FALSE
217	PF3D7_0301200.iso1.exon3.amp1_short_4317	-0.249953836	-0.039038103	0.210915733	0.347265473	0.99984053	FALSE
218	PF3D7_0301300.2o2_5567	0.022735637	-0.04352967	-0.066265307	0.50084592	0.99984053	FALSE
219	PF3D7_0301400.2o2_4671	0.000549423	0.053685137	0.053135714	0.730709933	0.99984053	FALSE
220	PF3D7_0301500.2o2_6419	-0.041523185	-0.107706539	-0.066183354	0.572037639	0.99984053	FALSE
221	PF3D7_0301700.e1s1_8026	-0.310187882	-0.135918885	0.174268997	0.577651252	0.99984053	FALSE
222	PF3D7_0301700.e2s1_8045	-0.08647281	-0.177976169	-0.09150336	0.736514798	0.99984053	FALSE
223	PF3D7_0301800.2o2_9014	-0.130780268	-0.163043685	-0.032263417	0.840724146	0.99984053	FALSE
224	PF3D7_0301900.1o1_7888	-0.041121567	0.037383883	0.07850545	0.709701964	0.99984053	FALSE
225	PF3D7_0302000.iso1.exon2.amp1_158	0.020768238	-0.139855016	-0.160623254	0.164182266	0.99984053	FALSE
226	PF3D7_0302200.1o9_6523	0.023651998	-0.127811392	-0.15146339	0.213232242	0.99984053	FALSE
227	PF3D7_0302200.9o9_6812	-0.093945011	-0.066678772	0.027266239	0.768336712	0.99984053	FALSE
228	PF3D7_0302200.e1_5952	0.028864858	-0.094894973	-0.123759831	0.26421932	0.99984053	FALSE
229	PF3D7_0302200.e2_6826	-0.124177006	-0.05636877	0.067808236	0.735232016	0.99984053	FALSE
230	PF3D7_0302200.e8_5663	-0.093115161	-0.073592052	0.01952311	0.919250596	0.99984053	FALSE
231	PF3D7_0302200.e9_5390	-0.270113607	-0.12321673	0.146896877	0.606022139	0.99984053	FALSE
232	PF3D7_0302500.e1s1_7185	-0.126083976	-0.176365056	-0.05028108	0.751138581	0.99984053	FALSE
233	PF3D7_0302500.e6s1_5136	-0.307510373	-0.077995009	0.229515365	0.423943894	0.99984053	FALSE
234	PF3D7_0302500.e9s1_6314	-0.289922701	-0.182441508	0.107481193	0.689045443	0.99984053	FALSE
235	PF3D7_0302800.e1s1_6041	-0.087416924	-0.265842856	-0.178425932	0.371876488	0.99984053	FALSE
236	PF3D7_0302900.e1s1_5473	-0.193920167	-0.167897104	0.026023063	0.914995783	0.99984053	FALSE
237	PF3D7_0302900.e1s2_5184	-0.193668434	-0.272057226	-0.078388792	0.805806293	0.99984053	FALSE
238	PF3D7_0303200.e2s1_6620	-0.026855859	-0.055389947	-0.028534087	0.684548024	0.99984053	FALSE
239	PF3D7_0303700.e1s1_6024	-0.170994061	-0.094976582	0.076017479	0.667656057	0.99984053	FALSE
240	PF3D7_0303800.1o1_7036	-0.034920385	0.023264348	0.058184733	0.395553839	0.99984053	FALSE
241	PF3D7_0304000.e4s1_5769	-0.162123768	-0.164308033	-0.002184265	0.992904151	0.99984053	FALSE
242	PF3D7_0304100.1o1_7041	0.034765793	-0.006078902	-0.040844695	0.683197423	0.99984053	FALSE
243	PF3D7_0304200.e1s1_8348	0.083482443	-0.088557299	-0.172039742	0.250661706	0.99984053	FALSE
244	PF3D7_0304600_7131	-0.001129345	0.389495729	0.390625074	0.000827782	0.99984053	FALSE
245	PF3D7_0305100.e1s3_8820	-0.064553718	-0.050018021	0.014535696	0.894261817	0.99984053	FALSE
246	PF3D7_0305200.iso1.exon1.amp1_3725	-0.1136109	-0.168249567	-0.054638667	0.683689151	0.99984053	FALSE
247	PF3D7_0305200.iso1.exon1.amp2_4239	-0.099355734	-0.127338078	-0.027982344	0.829922295	0.99984053	FALSE
248	PF3D7_0305500.e1s3_9107	-0.226884967	-0.405303903	-0.178418936	0.579036193	0.99984053	FALSE
249	PF3D7_0305600.1o1_7038	-0.28712198	-0.156142659	0.130979321	0.558770223	0.99984053	FALSE
250	PF3D7_0306200.5o5_6140	-0.171308451	-0.131667987	0.039640464	0.856614974	0.99984053	FALSE
251	PF3D7_0307300.1o1_7034	-0.094027539	-0.124873387	-0.030845848	0.842292464	0.99984053	FALSE
252	PF3D7_0307500.iso1.exon4.amp1_417	-0.100307662	-0.081293522	0.01901414	0.950607786	0.99984053	FALSE
253	PF3D7_0307700.e3s2_7088	-0.069213605	-0.209662677	-0.140449072	0.436840274	0.99984053	FALSE
254	PF3D7_0308000.1o1_8767	-0.134085256	-0.222344441	-0.088259185	0.715798655	0.99984053	FALSE
255	PF3D7_0308100.iso1.exon1.amp2_3062	0.037036097	-0.074902462	-0.111938558	0.362950103	0.99984053	FALSE
256	PF3D7_0308300.e1s1_6328	-0.076321113	-0.115509366	-0.039188254	0.710577882	0.99984053	FALSE
257	PF3D7_0308700.iso1.exon1.amp1_2745	0.168564331	-0.13300587	-0.301570201	0.173283631	0.99984053	FALSE
258	PF3D7_0308900.iso1.exon1.amp2_1908	-0.179762416	-0.054689394	0.125073022	0.206085078	0.99984053	FALSE
259	PF3D7_0309000.iso1.exon1.amp1_144	0.032112104	-0.220671081	-0.252783185	0.201296975	0.99984053	FALSE
260	PF3D7_0309100.iso1.exon5.amp1_2930	-0.119790677	-0.005716249	0.114074428	0.304373349	0.99984053	FALSE
261	PF3D7_0309200.iso1.exon3.amp2_2542	-0.056778309	-0.041658549	0.01511976	0.860194077	0.99984053	FALSE
262	PF3D7_0309600.e1s1_5717	-0.012062313	-0.069793748	-0.057731436	0.52757462	0.99984053	FALSE
263	PF3D7_0309900.iso1.exon2.amp1_655	-0.220813373	-0.151746595	0.069066778	0.646209219	0.99984053	FALSE
264	PF3D7_0310200.e1s3_7089	-0.128382875	-0.234872372	-0.106489497	0.674030532	0.99984053	FALSE
265	PF3D7_0310300.e1s1_6333	-0.386100778	-0.168785473	0.217315304	0.297835858	0.99984053	FALSE
266	PF3D7_0310300.e1s2_6327	-0.177633837	-0.10541971	0.072214127	0.709688698	0.99984053	FALSE
267	PF3D7_0310500.e1s1_7495	-0.095398459	-0.067097832	0.028300628	0.843138407	0.99984053	FALSE
268	PF3D7_0310500.e1s2_7206	-0.224490294	-0.125208771	0.099281523	0.737807901	0.99984053	FALSE
269	PF3D7_0310500.e1s3_8946	-0.203376539	-0.1683379	0.035038639	0.865624483	0.99984053	FALSE
270	PF3D7_0310700.2o2_7252	-0.195888257	-0.175484435	0.020403822	0.921583632	0.99984053	FALSE
271	PF3D7_0310800.1o1_6383	-0.142015998	-0.067881501	0.074134497	0.761548017	0.99984053	FALSE
272	PF3D7_0310800_9158	-0.194507921	0.057824205	0.252332126	0.231166601	0.99984053	FALSE
273	PF3D7_0311100.iso1.exon3.amp1_1794	-0.084549332	-0.069236626	0.015312706	0.833010877	0.99984053	FALSE
274	PF3D7_0311400.iso1.exon1.amp1_2120	-0.300943307	-0.163664739	0.137278568	0.573006529	0.99984053	FALSE
275	PF3D7_0311400.iso1.exon2.amp1_782	-0.06633426	-0.095937597	-0.029603337	0.86191123	0.99984053	FALSE
276	PF3D7_0311400.iso1.exon2.amp2_1071	-0.085141864	-0.14305963	-0.057917766	0.712422642	0.99984053	FALSE
277	PF3D7_0311600.2o5_9087	-0.239042229	-0.125246766	0.113795463	0.545651	0.99984053	FALSE
278	PF3D7_0311700.1o15_9041	-0.17454575	-0.146988076	0.027557674	0.869435622	0.99984053	FALSE
279	PF3D7_0311800.e3_7124	-0.13873903	-0.093332476	0.045406554	0.755650256	0.99984053	FALSE
280	PF3D7_0311900.1o1_5052	-0.062014049	-0.081094762	-0.019080713	0.874871338	0.99984053	FALSE
281	PF3D7_0312200.iso1.exon1.amp1_3720	-0.176206819	-0.053656244	0.122550575	0.307464704	0.99984053	FALSE
282	PF3D7_0312300.1o1_7872	-0.095688346	-0.052913742	0.042774605	0.666600229	0.99984053	FALSE
283	PF3D7_0312400.2o7_8753	-0.192588137	0.15454694	0.347135077	0.23063271	0.99984053	FALSE
284	PF3D7_0313000.1o2_7579	-0.091221292	-0.203344375	-0.112123083	0.451009129	0.99984053	FALSE
285	PF3D7_0313100.1o4_8505	-0.11817316	0.011594771	0.129767931	0.464927604	0.99984053	FALSE
286	PF3D7_0313200.1o1_9000	-0.125370416	-0.1336825	-0.008312084	0.958809969	0.99984053	FALSE
287	PF3D7_0313300.iso1.exon5.amp1_931	-0.214181814	-0.132660126	0.081521688	0.653481752	0.99984053	FALSE
288	PF3D7_0313400.iso1.exon1.amp1_445	-0.118641202	-0.141598879	-0.022957677	0.80910466	0.99984053	FALSE
289	PF3D7_0313600.5o6_7614	-0.003368604	-0.046166414	-0.042797811	0.61425224	0.99984053	FALSE
290	PF3D7_0313700.iso1.exon2.amp1_2360	-0.083776909	-0.059343304	0.024433605	0.83297739	0.99984053	FALSE
291	PF3D7_0313800.5o5_7343	-0.113542083	-0.127159384	-0.013617301	0.883002908	0.99984053	FALSE
292	PF3D7_0315100.e1s1_7183	-0.145477373	-0.170733577	-0.025256204	0.908202698	0.99984053	FALSE
293	PF3D7_0315200.iso1.exon1.amp3_2789	-0.090323706	-0.114887216	-0.024563511	0.908037451	0.99984053	FALSE
294	PF3D7_0315400.1o1_8147	0.018791351	-0.258665908	-0.27745726	0.209485375	0.99984053	FALSE
295	PF3D7_0315900.2o2_5837	-0.143921976	-0.096743944	0.047178032	0.780906818	0.99984053	FALSE
296	PF3D7_0316300.1.e3_6827	-0.189454074	-0.129446402	0.060007672	0.814865995	0.99984053	FALSE
297	PF3D7_0316500.e1s1_5735	-0.177804962	-0.082445586	0.095359377	0.558914813	0.99984053	FALSE
298	PF3D7_0317200.iso1.exon1.amp1_4590	-0.109990007	-0.149620586	-0.03963058	0.71791339	0.99984053	FALSE
299	PF3D7_0317200.iso1.exon1.amp2_3936	-0.176895098	-0.169251206	0.007643893	0.959452963	0.99984053	FALSE
300	PF3D7_0317300.s2_8011	-0.041880085	-0.07877185	-0.036891765	0.778303896	0.99984053	FALSE
301	PF3D7_0317300.s3_7150	-0.190956123	-0.094453618	0.096502505	0.587019082	0.99984053	FALSE
302	PF3D7_0317400.iso1.exon1.amp1_643	-0.170951154	-0.131433769	0.039517384	0.8236866	0.99984053	FALSE
303	PF3D7_0317400.iso1.exon2.amp1_3902	-0.107054831	-0.0367429	0.070311931	0.554148534	0.99984053	FALSE
304	PF3D7_0317500.iso1.exon1.amp1_3396	-0.089633391	-0.134213737	-0.044580346	0.762386623	0.99984053	FALSE
305	PF3D7_0317500.iso1.exon2.amp1_942	-0.121709895	-0.037984421	0.083725474	0.536713748	0.99984053	FALSE
306	PF3D7_0317700.e1s1_8247	-0.056550655	0.063903168	0.120453823	0.252428695	0.99984053	FALSE
307	PF3D7_0317700.e9s1_9185	-0.088303733	-0.176475954	-0.088172221	0.591936548	0.99984053	FALSE
308	PF3D7_0317800.1o1_7265	-0.13329689	-0.092230884	0.041066006	0.807088781	0.99984053	FALSE
309	PF3D7_0318200.e1s1_8532	-0.151550407	-0.22284027	-0.071289863	0.772390937	0.99984053	FALSE
310	PF3D7_0318200.e1s2_8534	-0.135000494	-0.1916147	-0.056614205	0.79101084	0.99984053	FALSE
311	PF3D7_0318200.e1s3_5066	-0.104795707	-0.012738002	0.092057705	0.61056647	0.99984053	FALSE
312	PF3D7_0318500.iso1.exon1.amp3_2251	-0.20521151	-0.230745471	-0.02553396	0.91940743	0.99984053	FALSE
313	PF3D7_0318500.iso1.exon1.amp4_222	-0.097199168	-0.152712757	-0.055513589	0.868624992	0.99984053	FALSE
314	PF3D7_0318500.iso1.exon1.amp5_162	-0.106100084	-0.04865272	0.057447364	0.707927559	0.99984053	FALSE
315	PF3D7_0318600.iso1.exon1.amp1_836	-0.200849371	-0.236993493	-0.036144122	0.844165488	0.99984053	FALSE
316	PF3D7_0318600.iso1.exon1.amp2_200	-0.224073463	-0.196362415	0.027711049	0.872942707	0.99984053	FALSE
317	PF3D7_0319000.iso1.exon1.amp1_3432	-0.25926033	-0.178584978	0.080675352	0.717857591	0.99984053	FALSE
318	PF3D7_0319100.1o1_7545	-0.096547098	-0.15168903	-0.055141932	0.823412511	0.99984053	FALSE
319	PF3D7_0319700.e1s1_5124	-0.098067135	-0.156347959	-0.058280824	0.670200168	0.99984053	FALSE
320	PF3D7_0319900.1o1_4676	-0.200080681	-0.077627704	0.122452976	0.507833071	0.99984053	FALSE
321	PF3D7_0320200.iso1.exon1.amp1_3627	-0.223422674	-0.044500477	0.178922196	0.132225002	0.99984053	FALSE
322	PF3D7_0320400.e1s3_6638	-0.145830636	-0.213376945	-0.067546309	0.749095367	0.99984053	FALSE
323	PF3D7_0320500.1o1_8174	-0.177914482	-0.104644869	0.073269613	0.763244841	0.99984053	FALSE
324	PF3D7_0320800.e1s1_8898	0.022101211	-0.25498579	-0.277087001	0.145575526	0.99984053	FALSE
325	PF3D7_0320800.e2s1_4867	-0.199132555	-0.181045527	0.018087029	0.944745076	0.99984053	FALSE
326	PF3D7_0321500.iso1.exon1.amp1_841	-0.089962412	-0.025973084	0.063989327	0.572219153	0.99984053	FALSE
327	PF3D7_0321600.e1_7117	-0.109934686	-0.067328842	0.042605844	0.616189348	0.99984053	FALSE
328	PF3D7_0321800.iso1.exon1.amp1_234	-0.022881627	-0.10463073	-0.081749104	0.285350464	0.99984053	FALSE
329	PF3D7_0322100.1o1_9067	-0.217235056	-0.214584704	0.002650351	0.992219045	0.99984053	FALSE
330	PF3D7_0322900.e2_5953	-0.121559751	-0.018276608	0.103283143	0.512222494	0.99984053	FALSE
331	PF3D7_0323300.1o1_6145	-0.104685175	-0.009184351	0.095500824	0.472475713	0.99984053	FALSE
332	PF3D7_0323600.e1_5672	-0.118234545	0.059032178	0.177266723	0.475649847	0.99984053	FALSE
333	PF3D7_0323800.e2s1_7381	-0.200700081	-0.279144519	-0.078444438	0.755593541	0.99984053	FALSE
334	PF3D7_0324100.2o2_5248	-0.140763181	-0.10394268	0.0368205	0.817029901	0.99984053	FALSE
335	PF3D7_0324400.iso1.exon2.amp1_1578	-0.189891068	-0.179299633	0.010591436	0.951144658	0.99984053	FALSE
336	PF3D7_0324600.iso1.exon2.amp1_3003	-0.220695358	-0.336403865	-0.115708507	0.680523028	0.99984053	FALSE
337	PF3D7_0324800.iso1.exon2.amp1_2158	-0.276450976	-0.229706694	0.046744282	0.843069864	0.99984053	FALSE
338	PF3D7_0324900.iso1.exon1.amp1_2456	0.097939612	-0.184004548	-0.28194416	0.245361403	0.99984053	FALSE
339	PF3D7_0324900.iso1.exon2.amp1_2239	-0.168239404	-0.090557508	0.077681896	0.535618896	0.99984053	FALSE
340	PF3D7_0400100.iso1.exon1.amp1_3682	-0.067951883	0.006886165	0.074838048	0.419219448	0.99984053	FALSE
341	PF3D7_0400100.iso1.exon1.amp2_3971	-0.1423557	-0.109913651	0.032442049	0.742149436	0.99984053	FALSE
342	PF3D7_0400100.iso1.exon1.amp3_4260	-0.029532616	-0.068093676	-0.038561061	0.642709587	0.99984053	FALSE
343	PF3D7_0400100.iso1.exon2.amp1_4192	-0.193731023	-0.251614696	-0.057883673	0.771564888	0.99984053	FALSE
344	PF3D7_0400200.iso1.exon1.amp1_1876	-0.223996352	-0.257907256	-0.033910904	0.881236166	0.99984053	FALSE
345	PF3D7_0400300.iso1.exon1.amp1_2731	-0.248337382	-0.312031729	-0.063694347	0.822179976	0.99984053	FALSE
346	PF3D7_0400400.iso1.exon1.amp1_1294	-0.206033521	-0.013543136	0.192490385	0.49473964	0.99984053	FALSE
347	PF3D7_0400500.iso1.exon2.amp1_998	-0.276517398	-0.309486245	-0.032968847	0.899850642	0.99984053	FALSE
348	PF3D7_0400700.iso1.exon1.amp1_992	-0.346351094	-0.248826521	0.097524573	0.696624744	0.99984053	FALSE
349	PF3D7_0400800.iso1.exon1.amp1_3008	-0.381390609	-0.241456688	0.139933921	0.540208878	0.99984053	FALSE
350	PF3D7_0400900.iso1.exon1.amp1_1573	-0.240121687	-0.172995994	0.067125693	0.769312245	0.99984053	FALSE
351	PF3D7_0401000.iso1.exon1.amp1_2432	-0.06002983	-0.165900025	-0.105870195	0.492510548	0.99984053	FALSE
352	PF3D7_0401200.iso1.exon2.amp1_2164	-0.305474933	-0.270646036	0.034828897	0.887984855	0.99984053	FALSE
353	PF3D7_0401300.iso1.exon2.amp1_3599	-0.156491213	-0.132700876	0.023790337	0.877071318	0.99984053	FALSE
354	PF3D7_0401400.iso1.exon2.amp1_1862	-0.239298621	-0.265050943	-0.025752322	0.904129628	0.99984053	FALSE
355	PF3D7_0401600.iso2.exon3.amp1_3896	-0.09176788	-0.05012542	0.04164246	0.537365875	0.99984053	FALSE
356	PF3D7_0401900.1o1_7666	-0.298327644	-0.073519044	0.2248086	0.322863731	0.99984053	FALSE
357	PF3D7_0402000 (renamed)_9038	-0.136789173	-0.030999673	0.1057895	0.536825014	0.99984053	FALSE
358	PF3D7_0402000.e1s1_9149	-0.130565036	-0.093363073	0.037201963	0.828386689	0.99984053	FALSE
359	PF3D7_0402100.e2s1_6909	-0.036269291	-0.020528923	0.015740368	0.825633566	0.99984053	FALSE
360	PF3D7_0402200 (renamed)_8951	0.087964331	0.005088555	-0.082875775	0.442127624	0.99984053	FALSE
361	PF3D7_0402400.2o2_4672	-0.234309557	-0.130108119	0.104201438	0.524647114	0.99984053	FALSE
362	PF3D7_0402600.iso1.exon1.amp1_4449	-0.172021496	-0.33894278	-0.166921284	0.45095781	0.99984053	FALSE
363	PF3D7_0403500.1o1_6443	-0.133929896	-0.126612761	0.007317135	0.973686208	0.99984053	FALSE
364	PF3D7_0403900.iso1.exon1.amp1_1235	-0.26136811	-0.127901172	0.133466938	0.583076499	0.99984053	FALSE
365	PF3D7_0404100.iso1.exon1.amp1_2815	0.05069776	-0.069084945	-0.119782704	0.49506929	0.99984053	FALSE
366	PF3D7_0404100.iso1.exon2.amp1_674	-0.150961524	-0.109380219	0.041581305	0.804650059	0.99984053	FALSE
367	PF3D7_0404200.iso1.exon2.amp1_2698	-0.078987251	-0.12753978	-0.048552529	0.805793503	0.99984053	FALSE
368	PF3D7_0404600.s3_7434	-0.174774889	-0.153627884	0.021147006	0.883766757	0.99984053	FALSE
369	PF3D7_0404600.s5_7440	-0.100335294	-0.081554855	0.018780439	0.918909958	0.99984053	FALSE
370	PF3D7_0404700.1o2_6213	-0.161239336	-0.12190416	0.039335176	0.744973622	0.99984053	FALSE
371	PF3D7_0404800.1o2_6179	-0.071590188	0.05563825	0.127228438	0.444816089	0.99984053	FALSE
372	PF3D7_0404800.e1_7407	-0.116543461	0.072458225	0.189001686	0.31026721	0.99984053	FALSE
373	PF3D7_0405300.iso1.exon1.amp1_1116	-0.059442634	-0.228870604	-0.169427971	0.299237316	0.99984053	FALSE
374	PF3D7_0405300.iso1.exon1.amp2_3940	-0.06323823	-0.024648735	0.038589495	0.752682314	0.99984053	FALSE
375	PF3D7_0405400.e2s1_6356	-0.183056167	-0.198052779	-0.014996611	0.901319008	0.99984053	FALSE
376	PF3D7_0405400.e2s4_7512	-0.148904606	-0.250800599	-0.101895992	0.623705753	0.99984053	FALSE
377	PF3D7_0405600.2o9_6125	-0.02707864	-0.092479029	-0.06540039	0.605546222	0.99984053	FALSE
378	PF3D7_0405700.iso1.exon1.amp1_1975	-0.170352897	-0.176317994	-0.005965097	0.983409546	0.99984053	FALSE
379	PF3D7_0405700.iso1.exon1.amp3_181	-0.009000115	-0.084032133	-0.075032018	0.485349468	0.99984053	FALSE
380	PF3D7_0405900.e3s1_6875	-0.12084222	-0.102628981	0.01821324	0.897324282	0.99984053	FALSE
381	PF3D7_0406200_8002	-0.284237268	0.002698555	0.286935823	0.37453037	0.99984053	FALSE
382	PF3D7_0406500.iso1.exon2.amp4_169	-0.027830512	0.043904012	0.071734524	0.750720584	0.99984053	FALSE
383	PF3D7_0406700.iso1.exon9.amp1_3850	-0.281538293	-0.179217568	0.102320725	0.675390708	0.99984053	FALSE
384	PF3D7_0406800.iso1.exon3.amp1_3542	-0.124942213	-0.02465211	0.100290103	0.445950854	0.99984053	FALSE
385	PF3D7_0406900.4o8_8241	-0.209017157	-0.148699105	0.060318052	0.763484052	0.99984053	FALSE
386	PF3D7_0407000.1o1_5004	-0.040046832	-0.10448825	-0.064441419	0.632592613	0.99984053	FALSE
387	PF3D7_0407200.iso1.exon5.amp1_341	-0.263217142	-0.242728088	0.020489053	0.943828898	0.99984053	FALSE
388	PF3D7_0407700.e2s1_5470	-0.134332269	0.013887916	0.148220184	0.383348682	0.99984053	FALSE
389	PF3D7_0407700.e2s2_6343	-0.235748343	-0.119406447	0.116341897	0.460752967	0.99984053	FALSE
390	PF3D7_0408000.iso1.exon1.amp1_683	-0.037594515	-0.029847884	0.007746631	0.876394728	0.99984053	FALSE
391	PF3D7_0408600_7148	-0.108589721	-0.056931692	0.051658029	0.898693404	0.99984053	FALSE
392	PF3D7_0408700.e3s1_8902	-0.17692696	-0.186353492	-0.009426531	0.96281638	0.99984053	FALSE
393	PF3D7_0408700.e5s1_7160	-0.278639882	-0.124161081	0.1544788	0.545447041	0.99984053	FALSE
394	PF3D7_0408700.e6s1_5713	0.017996982	-0.049603069	-0.067600051	0.60807408	0.99984053	FALSE
395	PF3D7_0408900.1.e3s1_7464	-0.126658878	-0.023407851	0.103251028	0.441326081	0.99984053	FALSE
396	PF3D7_0409200.iso1.exon1.amp1_3910	-0.144823115	-0.085154822	0.059668293	0.448563666	0.99984053	FALSE
397	PF3D7_0409500.2o2_7867	-0.217250002	-0.040065873	0.177184129	0.440189051	0.99984053	FALSE
398	PF3D7_0409600.iso1.exon1.amp1_551	-0.022507624	0.090310952	0.112818575	0.601734824	0.99984053	FALSE
399	PF3D7_0409600.iso1.exon1.amp2_1059	-0.068151861	0.143231129	0.21138299	0.272356494	0.99984053	FALSE
400	PF3D7_0409900.7o7_7316	-0.209309527	-0.083575596	0.12573393	0.588043484	0.99984053	FALSE
401	PF3D7_0410300.1o2_7946	-0.113346706	-0.17956868	-0.066221974	0.676799788	0.99984053	FALSE
402	PF3D7_0410500.iso1.exon1.amp1_4441	-0.138130285	-0.119920663	0.018209622	0.889569654	0.99984053	FALSE
403	PF3D7_0410800.iso1.exon1.amp2_1340	-0.130197792	-0.281506173	-0.151308381	0.582164479	0.99984053	FALSE
404	PF3D7_0410900.1o1_6799	-0.080733598	0.145999219	0.226732817	0.124320143	0.99984053	FALSE
405	PF3D7_0411000.iso1.exon1.amp1_3723	-0.156144564	-0.24526055	-0.089115986	0.674089509	0.99984053	FALSE
406	PF3D7_0411700.1o1_4939	-0.126791894	-0.022292435	0.104499459	0.438543501	0.99984053	FALSE
407	PF3D7_0411900.iso1.exon1.amp1_724	-0.050092668	-0.033721472	0.016371196	0.805209584	0.99984053	FALSE
408	PF3D7_0411900.iso1.exon2.amp2_seg2_2021	-0.32054191	-0.087345606	0.233196304	0.237323221	0.99984053	FALSE
409	PF3D7_0412000.1o1_7937	-0.330024578	-0.262726108	0.06729847	0.805190378	0.99984053	FALSE
410	PF3D7_0412400.iso1.exon1.amp1_3330	-0.242202794	-0.15814131	0.084061483	0.409049792	0.99984053	FALSE
411	PF3D7_0412400.iso1.exon2.amp2_3106	-0.08086441	-0.076275041	0.004589369	0.961129793	0.99984053	FALSE
412	PF3D7_0412700.iso1.exon1.amp1_2752	-0.160138551	-0.203822065	-0.043683514	0.802704942	0.99984053	FALSE
413	PF3D7_0412700.iso1.exon2.amp2_1081	-0.04815885	-0.070683725	-0.022524875	0.733605959	0.99984053	FALSE
414	PF3D7_0412900.iso1.exon1.amp1_435	-0.078896706	-0.057454198	0.021442508	0.931693035	0.99984053	FALSE
415	PF3D7_0412900.iso1.exon2.amp2_3385	-0.351498309	-0.350108972	0.001389337	0.994480946	0.99984053	FALSE
416	PF3D7_0413200.iso1.exon1.amp1_2147	-0.212359118	-0.102596107	0.109763011	0.437413974	0.99984053	FALSE
417	PF3D7_0413300.iso1.exon2.amp1_707	-0.195845705	-0.187543327	0.008302378	0.950051821	0.99984053	FALSE
418	PF3D7_0414000.e2s1_8062	-0.115694883	-0.087370435	0.028324448	0.787999093	0.99984053	FALSE
419	PF3D7_0414700.1o1_7337	-0.173522352	-0.111249749	0.062272602	0.678792648	0.99984053	FALSE
420	PF3D7_0414900.e4s1_5677	-0.122596354	-0.077430374	0.045165979	0.848962709	0.99984053	FALSE
421	PF3D7_0415000.1o1_7877	-0.274569403	-0.160015862	0.114553541	0.666055792	0.99984053	FALSE
422	PF3D7_0415100.iso1.exon1.amp1_2166	-0.070876521	-0.140006622	-0.069130101	0.678949741	0.99984053	FALSE
423	PF3D7_0415300.iso1.exon1.amp1_4554	-0.063202309	-0.164372597	-0.101170288	0.411559349	0.99984053	FALSE
424	PF3D7_0415300.iso1.exon1.amp2_3693	-0.057035747	-0.150785503	-0.093749755	0.445072101	0.99984053	FALSE
425	PF3D7_0415400.1o1_6387	-0.177094858	-0.085924475	0.091170383	0.630794059	0.99984053	FALSE
426	PF3D7_0416300.iso1.exon1.amp2_462	-0.124461587	-0.03323607	0.091225518	0.309329081	0.99984053	FALSE
427	PF3D7_0416400.iso1.exon2.amp1_1080	-0.159103878	-0.056763646	0.102340232	0.602075312	0.99984053	FALSE
428	PF3D7_0416400.iso1.exon2.amp2_3664	-0.053224622	-0.087211566	-0.033986945	0.816277797	0.99984053	FALSE
429	PF3D7_0416600.1o1_5263	-0.028022381	-0.038087696	-0.010065315	0.932751648	0.99984053	FALSE
430	PF3D7_0416900.iso1.exon2.amp2_seg1_2886	-0.088394153	-0.034831652	0.053562501	0.537231309	0.99984053	FALSE
431	PF3D7_0417100.1o4_5878	-0.054041695	-0.22182753	-0.167785836	0.372282186	0.99984053	FALSE
432	PF3D7_0417400.iso1.exon1.amp4_seg2_2328	-0.173238785	-0.271585383	-0.098346598	0.715860619	0.99984053	FALSE
433	PF3D7_0417400.iso1.exon1.amp6_seg1_1730	-0.109072685	-0.030144771	0.078927914	0.555018355	0.99984053	FALSE
434	PF3D7_0418000.6o10_5641	-0.119607169	-0.086332801	0.033274367	0.831154445	0.99984053	FALSE
435	PF3D7_0418000.7o10_5069	-0.196730772	-0.064283534	0.132447238	0.566905622	0.99984053	FALSE
436	PF3D7_0418800.iso1.exon4.amp1_2929	-0.307075966	-0.124409328	0.182666637	0.460463706	0.99984053	FALSE
437	PF3D7_0419100.iso1.exon1.amp1_2401	-0.193728826	-0.008561871	0.185166955	0.377459219	0.99984053	FALSE
438	PF3D7_0419200.1o1_6384	-0.14175899	-0.146881674	-0.005122684	0.985534526	0.99984053	FALSE
439	PF3D7_0419300.iso1.exon1.amp1_2162	-0.168517271	-0.125807682	0.042709589	0.73845321	0.99984053	FALSE
440	PF3D7_0419400.2o4_8826	-0.198110664	-0.098321344	0.099789321	0.743350323	0.99984053	FALSE
441	PF3D7_0419400.3o4_9115	-0.181728225	-0.099618943	0.082109282	0.584060551	0.99984053	FALSE
442	PF3D7_0419400.4o4_8537	-0.224984912	-0.093061278	0.131923635	0.517175928	0.99984053	FALSE
443	PF3D7_0419500.1o1_5301	-0.009596764	0.010999792	0.020596556	0.845794348	0.99984053	FALSE
444	PF3D7_0419700.1o1_8146	0.001059	-0.216338854	-0.217397854	0.147873375	0.99984053	FALSE
445	PF3D7_0419900.iso1.exon3.amp1_2826	-0.07751075	-0.176029915	-0.098519165	0.604964738	0.99984053	FALSE
446	PF3D7_0419900.iso1.exon3.amp5_seg1_2006	-0.079035381	-0.038582885	0.040452496	0.6049425	0.99984053	FALSE
447	PF3D7_0420000.s2_5994	-0.105585443	-0.096226838	0.009358605	0.916295226	0.99984053	FALSE
448	PF3D7_0420300.iso1.exon1.amp1_521	-0.111600507	-0.179919708	-0.068319201	0.723176746	0.99984053	FALSE
449	PF3D7_0420300.iso1.exon1.amp3_1099	-0.060697036	-0.190742066	-0.13004503	0.521241206	0.99984053	FALSE
450	PF3D7_0420300.iso1.exon1.amp4_seg1_3445	-0.069339894	-0.278317408	-0.208977514	0.495701099	0.99984053	FALSE
451	PF3D7_0420600.iso1.exon1.amp1_2477	-0.040493258	-0.008045942	0.032447316	0.721526238	0.99984053	FALSE
452	PF3D7_0420700.e2s1_8336	-0.135024023	-0.10703688	0.027987143	0.829937085	0.99984053	FALSE
453	PF3D7_0420900.iso1.exon1.amp1_4190	-0.226041468	-0.164740739	0.061300729	0.79875926	0.99984053	FALSE
454	PF3D7_0421200.iso1.exon2.amp1_3312	-0.204060817	-0.154274286	0.04978653	0.820881512	0.99984053	FALSE
455	PF3D7_0421300.iso1.exon1.amp1_2739	-0.145050606	-0.249538874	-0.104488268	0.726925211	0.99984053	FALSE
456	PF3D7_0421800.iso1.exon1.amp1_1236	-0.110279144	-0.021243781	0.089035363	0.174033291	0.99984053	FALSE
457	PF3D7_0422000.5o5_7285	-0.350394995	-0.148187035	0.20220796	0.504773878	0.99984053	FALSE
458	PF3D7_0422100 (renamed)_7011	-0.102581261	-0.241747951	-0.13916669	0.49429003	0.99984053	FALSE
459	PF3D7_0422200.iso1.exon1.amp4_2550	-0.086162252	-0.106759776	-0.020597524	0.912477184	0.99984053	FALSE
460	PF3D7_0422300.e3s1_6907	-0.276369906	-0.049713649	0.226656258	0.30852021	0.99984053	FALSE
461	PF3D7_0422400.e2s1_5434	-0.172879824	-0.135076587	0.037803237	0.850479951	0.99984053	FALSE
462	PF3D7_0422500.e1s2_8254	-0.16639849	-0.145423765	0.020974725	0.920289719	0.99984053	FALSE
463	PF3D7_0422500.e1s3_5652	-0.15985703	-0.011105092	0.148751939	0.396920177	0.99984053	FALSE
464	PF3D7_0422700.e1s1_4878	-0.230062055	-0.145335444	0.084726611	0.728390874	0.99984053	FALSE
465	PF3D7_0423100.iso1.exon1.amp1_3832	-0.248376631	-0.148415695	0.099960937	0.627939794	0.99984053	FALSE
466	PF3D7_0423400.1o1_7833	-0.223426175	-0.082439632	0.140986543	0.608882391	0.99984053	FALSE
467	PF3D7_0423700.1o1_6673	-0.551982289	-0.098707807	0.453274481	0.288512058	0.99984053	FALSE
468	PF3D7_0424200.iso1.exon1.amp2_2772	-0.026593532	-0.204377391	-0.177783859	0.306891871	0.99984053	FALSE
469	PF3D7_0424600.e2s1_8623	-0.06134945	-0.185878866	-0.124529416	0.47114812	0.99984053	FALSE
470	PF3D7_0424800.2o2_6416	-0.037885882	-0.141408518	-0.103522636	0.606612862	0.99984053	FALSE
471	PF3D7_0425100.2o2_8127	-0.122435915	-0.186216873	-0.063780958	0.549346697	0.99984053	FALSE
472	PF3D7_0425200.2o2_5531	-0.076810372	-0.135347538	-0.058537166	0.76359375	0.99984053	FALSE
473	PF3D7_0425300.1o1_8130	-0.10730334	-0.094105053	0.013198287	0.944119933	0.99984053	FALSE
474	PF3D7_0425500.iso1.exon1.amp1_1565	-0.254004598	-0.356603256	-0.102598658	0.574130461	0.99984053	FALSE
475	PF3D7_0425700.iso1.exon1.amp1_4168	-0.199490465	-0.26230885	-0.062818385	0.813816617	0.99984053	FALSE
476	PF3D7_0425800.iso1.exon1.amp1_3955	-0.096266178	-0.091668324	0.004597854	0.958236144	0.99984053	FALSE
477	PF3D7_0425800.iso1.exon1.amp2_4244	-0.19475629	-0.084029767	0.110726523	0.364888863	0.99984053	FALSE
478	PF3D7_0425800.iso1.exon2.amp1_4183	-0.039124634	-0.023654239	0.015470395	0.967954574	0.99984053	FALSE
479	PF3D7_0425900.iso1.exon2.amp1_4457	-0.140568282	-0.156253138	-0.015684856	0.929985439	0.99984053	FALSE
480	PF3D7_0426000.iso1.exon1.amp1_4198	-0.228037014	-0.127895044	0.10014197	0.521142314	0.99984053	FALSE
481	PF3D7_0500100.iso1.exon1.amp1_2232	-0.245630289	-0.12284704	0.122783249	0.482994015	0.99984053	FALSE
482	PF3D7_0500100.iso1.exon2.amp1_1299	0.001915902	-0.244290122	-0.246206024	0.328471932	0.99984053	FALSE
483	PF3D7_0500400.iso1.exon1.amp1_3882	-0.223983658	-0.356456301	-0.132472643	0.600944491	0.99984053	FALSE
484	PF3D7_0500500.iso1.exon1.amp1_2721	-0.043453424	-0.246293983	-0.202840559	0.224788122	0.99984053	FALSE
485	PF3D7_0500800.e1s1_7120	-0.157353104	-0.048344139	0.109008965	0.516587451	0.99984053	FALSE
486	PF3D7_0500800.e2s1_8081	-0.267922544	-0.173403151	0.094519393	0.738837327	0.99984053	FALSE
487	PF3D7_0500900.iso1.exon2.amp1_442	-0.036361357	-0.045400929	-0.009039572	0.928686133	0.99984053	FALSE
488	PF3D7_0501000.e1s1_4842	-0.169965656	-0.012670107	0.157295549	0.193943359	0.99984053	FALSE
489	PF3D7_0501000.e2s1_5152	-0.316803531	-0.130533641	0.186269889	0.53373606	0.99984053	FALSE
490	PF3D7_0501100.1.e3s1_7453	-0.113435417	-0.069573792	0.043861625	0.801005734	0.99984053	FALSE
491	PF3D7_0501100.1.e4s1_6302	-0.190508911	-0.149620731	0.04088818	0.761118402	0.99984053	FALSE
492	PF3D7_0501100.iso2.exon3.amp1_2407	-0.151222403	-0.052771521	0.098450882	0.565425967	0.99984053	FALSE
493	PF3D7_0501200.e2_7703	-0.143348243	-0.09278887	0.050559372	0.788694763	0.99984053	FALSE
494	PF3D7_0501500.e1s1_8931	-0.103021011	-0.1592282	-0.05620719	0.623327851	0.99984053	FALSE
495	PF3D7_0501600.e1s1_8642	-0.369536319	-0.185055167	0.184481152	0.533883783	0.99984053	FALSE
496	PF3D7_0501800.e1s1_4880	0.028105497	-0.037782151	-0.065887648	0.645014006	0.99984053	FALSE
497	PF3D7_0501800.e1s2_6042	-0.227799587	0.117808193	0.345607781	0.067972764	0.99984053	FALSE
498	PF3D7_0501900.iso1.exon2.amp1_2980	-0.224616864	-0.193601669	0.031015195	0.925015652	0.99984053	FALSE
499	PF3D7_0502000.iso1.exon2.amp1_1211	-0.295231944	-0.204636285	0.090595659	0.715457931	0.99984053	FALSE
500	PF3D7_0502200.2o2_5863	-0.028715555	-0.149231846	-0.120516291	0.360144347	0.99984053	FALSE
501	PF3D7_0502400.1o1_5886	-0.273826316	-0.263998789	0.009827528	0.979482925	0.99984053	FALSE
502	PF3D7_0502700.iso1.exon2.amp1_3857	-0.112964766	-0.130066471	-0.017101705	0.932217994	0.99984053	FALSE
503	PF3D7_0502800.1o1_6679	-0.284153269	-0.098940958	0.185212311	0.502481181	0.99984053	FALSE
504	PF3D7_0503000.5o5_8733	-0.155537006	-0.09624775	0.059289256	0.777469357	0.99984053	FALSE
505	PF3D7_0503600.e1s1_5436	-0.138560084	-0.074291623	0.064268461	0.596425161	0.99984053	FALSE
506	PF3D7_0503600.e7s1_7736	-0.251938742	-0.059770836	0.192167906	0.48437531	0.99984053	FALSE
507	PF3D7_0503900.2o2_5032	-0.006786468	-0.143277822	-0.136491354	0.336751935	0.99984053	FALSE
508	PF3D7_0504200.2o3_7328	-0.134315935	-0.097309414	0.03700652	0.831319522	0.99984053	FALSE
509	PF3D7_0504400.iso1.exon1.amp1_2757	-0.063381282	-0.154934082	-0.091552801	0.596333028	0.99984053	FALSE
510	PF3D7_0504500.5o6_9016	-0.116435688	-0.083949526	0.032486162	0.808704713	0.99984053	FALSE
511	PF3D7_0504600_5397	-0.332787199	-0.107153732	0.225633467	0.29236972	0.99984053	FALSE
512	PF3D7_0504800.iso1.exon1.amp1_1378	0.040025457	-0.112159257	-0.152184714	0.285398809	0.99984053	FALSE
513	PF3D7_0504800.iso1.exon1.amp2_1667	-0.321504924	0.025807265	0.347312189	0.107892958	0.99984053	FALSE
514	PF3D7_0505100.iso1.exon1.amp1_1083	-0.200804939	-0.214024213	-0.013219274	0.948811953	0.99984053	FALSE
515	PF3D7_0505100.iso1.exon1.amp2_3685	-0.076208318	-0.118794256	-0.042585938	0.775749591	0.99984053	FALSE
516	PF3D7_0505100.iso1.exon2.amp1_507	-0.103139018	-0.12721553	-0.024076513	0.894128198	0.99984053	FALSE
517	PF3D7_0505100.iso1.exon2.amp2_1332	-0.156998131	-0.145697926	0.011300205	0.956848403	0.99984053	FALSE
518	PF3D7_0505200.e1s1_6332	-0.182909843	-0.187558427	-0.004648584	0.978089197	0.99984053	FALSE
519	PF3D7_0505400.1o1_4753	-0.103342798	-0.062631852	0.040710946	0.587432278	0.99984053	FALSE
520	PF3D7_0505500.e1s1_4811	-0.034104342	0.010760543	0.044864885	0.744039323	0.99984053	FALSE
521	PF3D7_0505500.e2_6247	-0.327942944	-0.236049803	0.091893141	0.777801544	0.99984053	FALSE
522	PF3D7_0506200.1o1_7857	-0.181127811	-0.139519466	0.041608345	0.84183394	0.99984053	FALSE
523	PF3D7_0506300.iso1.exon1.amp1_3900	-0.098173496	-0.165328102	-0.067154606	0.708884102	0.99984053	FALSE
524	PF3D7_0506800.e1_6284	-0.081844298	-0.096657547	-0.014813249	0.898071252	0.99984053	FALSE
525	PF3D7_0506900.1o1_6208	-0.212773028	-0.098719863	0.114053165	0.401263187	0.99984053	FALSE
526	PF3D7_0507200.iso1.exon1.amp1_150	-0.017527602	-0.134441657	-0.116914055	0.422629855	0.99984053	FALSE
527	PF3D7_0507300 (plasmodb revised)_5405	-0.116960971	-0.110506776	0.006454194	0.97569543	0.99984053	FALSE
528	PF3D7_0507700.e1s1_5454	-0.079494054	-0.123500206	-0.044006152	0.703120434	0.99984053	FALSE
529	PF3D7_0507900.iso1.exon2.amp1_43	-0.235855827	-0.176988185	0.058867642	0.80896842	0.99984053	FALSE
530	PF3D7_0508000.1o1_6429	-0.17573285	-0.080789056	0.094943794	0.680974388	0.99984053	FALSE
531	PF3D7_0508400.4o4_6424	-0.081489927	0.048056676	0.129546603	0.37470897	0.99984053	FALSE
532	PF3D7_0508500.s3_4828	-0.10647852	-0.150404617	-0.043926097	0.800481894	0.99984053	FALSE
533	PF3D7_0508600.iso1.exon1.amp1_3875	-0.123561678	-0.09663467	0.026927008	0.834935439	0.99984053	FALSE
534	PF3D7_0508900.iso1.exon1.amp1_1678	-0.220522647	-0.007755427	0.21276722	0.192450008	0.99984053	FALSE
535	PF3D7_0508900.iso1.exon1.amp2_1967	-0.273464614	-0.022920918	0.250543696	0.336761816	0.99984053	FALSE
536	PF3D7_0508900.iso1.exon1.amp4_4215	-0.062348841	-0.014816157	0.047532684	0.613434542	0.99984053	FALSE
537	PF3D7_0509000.e5s1_6290	-0.253715432	-0.121850284	0.131865148	0.468223625	0.99984053	FALSE
538	PF3D7_0509100.iso1.exon1.amp1_2855	0.032945109	-0.225881655	-0.258826764	0.228126581	0.99984053	FALSE
539	PF3D7_0509100.iso1.exon1.amp2_3351	-0.131528398	-0.171110026	-0.039581628	0.763356271	0.99984053	FALSE
540	PF3D7_0509200.iso1.exon4.amp1_392	-0.153503848	-0.103271803	0.050232045	0.851090137	0.99984053	FALSE
541	PF3D7_0509500.1o1_6441	-0.185783801	-0.002899312	0.182884489	0.325763031	0.99984053	FALSE
542	PF3D7_0509600.2o2_7637	-0.156496527	-0.178828139	-0.022331612	0.927161372	0.99984053	FALSE
543	PF3D7_0509700.e4s1_9186	-0.158016233	0.003603514	0.161619747	0.298105744	0.99984053	FALSE
544	PF3D7_0509800.2o4_8246	-0.246616373	-0.111742777	0.134873596	0.580229994	0.99984053	FALSE
545	PF3D7_0509900.iso1.exon1.amp1_3597	-0.155824845	-0.149331728	0.006493116	0.971834036	0.99984053	FALSE
546	PF3D7_0510100.iso1.exon1.amp2_4582	-0.116034086	-0.234720497	-0.118686411	0.47268214	0.99984053	FALSE
547	PF3D7_0510100.iso1.exon1.amp3_1915	-0.291727669	-0.254248936	0.037478733	0.89382048	0.99984053	FALSE
548	PF3D7_0510400.1o1_8464	-0.013883825	-0.06503288	-0.051149056	0.657074231	0.99984053	FALSE
549	PF3D7_0510800.1o1_4938	-0.340206517	-0.202079365	0.138127152	0.506755033	0.99984053	FALSE
550	PF3D7_0511100.iso1.exon2.amp1_1537	-0.147321856	-0.127812109	0.019509747	0.89616379	0.99984053	FALSE
551	PF3D7_0511300.iso1.exon1.amp1_2538	-0.025661387	-0.173813344	-0.148151957	0.573320702	0.99984053	FALSE
552	PF3D7_0511400.1o1_4698	-0.152572203	-0.064163529	0.088408675	0.535058967	0.99984053	FALSE
553	PF3D7_0511400_8865	-0.32736113	-0.114537721	0.21282341	0.142730932	0.99984053	FALSE
554	PF3D7_0511500.s1_7710	-0.063854783	-0.052878652	0.010976132	0.924072524	0.99984053	FALSE
555	PF3D7_0511500.s3_7138	-0.227926023	-0.127949197	0.099976827	0.651065312	0.99984053	FALSE
556	PF3D7_0511500.s4_7427	0.015906019	-0.011917341	-0.02782336	0.816317299	0.99984053	FALSE
557	PF3D7_0511600.1o1_5809	-0.219936973	-0.157345285	0.062591688	0.835647001	0.99984053	FALSE
558	PF3D7_0512100.iso1.exon2.amp1_3546	-0.098883817	-0.024860538	0.074023279	0.59761656	0.99984053	FALSE
559	PF3D7_0512600.e6s1_7173	-0.140127538	-0.041322758	0.09880478	0.325923978	0.99984053	FALSE
560	PF3D7_0512900.iso1.exon1.amp1_3002	-0.156318547	-0.018505868	0.137812679	0.356824817	0.99984053	FALSE
561	PF3D7_0513000.e1s1_5733	-0.305777373	-0.068101588	0.237675785	0.41864172	0.99984053	FALSE
562	PF3D7_0513100.2o3_7569	-0.087263992	-0.070389335	0.016874657	0.916300584	0.99984053	FALSE
563	PF3D7_0513200.e2s3_5488	-0.180496232	-0.003985947	0.176510286	0.454206034	0.99984053	FALSE
564	PF3D7_0513300.e1s1_8334	-0.115189005	-0.107068134	0.008120871	0.95629739	0.99984053	FALSE
565	PF3D7_0513400.iso1.exon2.amp1_92	-0.286526085	-0.16066297	0.125863115	0.658669136	0.99984053	FALSE
566	PF3D7_0513700.e3s1_8904	-0.20052625	-0.098783475	0.101742775	0.569410553	0.99984053	FALSE
567	PF3D7_0514000.iso1.exon2.amp1_129	-0.054053447	0.082251251	0.136304697	0.141445354	0.99984053	FALSE
568	PF3D7_0514100.iso1.exon1.amp2_3648	-0.077114628	-0.056266659	0.020847969	0.860318984	0.99984053	FALSE
569	PF3D7_0514600.iso1.exon2.amp1_2392	-0.259675962	-0.134005125	0.125670836	0.608193799	0.99984053	FALSE
570	PF3D7_0514900.1o1_8458	-0.16639296	-0.089383212	0.077009749	0.614195749	0.99984053	FALSE
571	PF3D7_0516000.iso1.exon1.amp1_2533	-0.014444719	-0.048166455	-0.033721736	0.644755771	0.99984053	FALSE
572	PF3D7_0516400.1o1_9029	-0.272781639	-0.263098189	0.00968345	0.968063564	0.99984053	FALSE
573	PF3D7_0516500.5o6_7013	-0.160558755	-0.06936611	0.091192646	0.593560703	0.99984053	FALSE
574	PF3D7_0516600.s1_6862	-0.105339901	0.077234071	0.182573973	0.146075512	0.99984053	FALSE
575	PF3D7_0516600.s2_5122	-0.050280554	-0.062090168	-0.011809614	0.89892847	0.99984053	FALSE
576	PF3D7_0516800.iso1.exon1.amp2_530	-0.019807185	-0.120845036	-0.101037851	0.432383597	0.99984053	FALSE
577	PF3D7_0516800.iso1.exon1.amp3_1048	-0.040749364	-0.039827361	0.000922003	0.993414466	0.99984053	FALSE
578	PF3D7_0517600.1o1_7287	-0.196703328	-0.272912913	-0.076209585	0.70082215	0.99984053	FALSE
579	PF3D7_0517700_5368	-0.126663221	-0.080054732	0.046608489	0.821792945	0.99984053	FALSE
580	PF3D7_0517900.2o2_7334	-0.099617162	-0.133229788	-0.033612626	0.831659166	0.99984053	FALSE
581	PF3D7_0518400.iso1.exon1.amp1_4147	-0.189768451	-0.095333992	0.094434459	0.373406635	0.99984053	FALSE
582	PF3D7_0518600.iso1.exon1.amp1_1407	-0.184645454	-0.259504475	-0.074859022	0.647972664	0.99984053	FALSE
583	PF3D7_0518600.iso1.exon1.amp2_1924	-0.156573444	-0.115615016	0.040958428	0.709757288	0.99984053	FALSE
584	PF3D7_0518700.e1s1_5478	-0.007439495	-0.086423396	-0.078983901	0.485401954	0.99984053	FALSE
585	PF3D7_0518700.e3s1_8039	-0.190647752	-0.088435261	0.102212491	0.442792699	0.99984053	FALSE
586	PF3D7_0518800.iso1.exon7.amp1_2109	-0.183539978	-0.155597909	0.027942069	0.901727867	0.99984053	FALSE
587	PF3D7_0518900.iso1.exon1.amp1_2982	-0.201527079	-0.119096853	0.082430226	0.625660715	0.99984053	FALSE
588	PF3D7_0519000.iso1.exon1.amp1_4167	-0.038860213	-0.072962404	-0.03410219	0.728423153	0.99984053	FALSE
589	PF3D7_0519100.iso1.exon1.amp1_673	-0.085670302	-0.038111443	0.047558858	0.583745904	0.99984053	FALSE
590	PF3D7_0519200.e2s1_5387	-0.344268921	-0.108357901	0.235911021	0.484052962	0.99984053	FALSE
591	PF3D7_0519300.1o1_9072	-0.139960353	-0.01177099	0.128189364	0.231204701	0.99984053	FALSE
592	PF3D7_0519900.1o1_7902	-0.209467219	-0.14622866	0.063238559	0.771879539	0.99984053	FALSE
593	PF3D7_0520000.e3s1_9191	-0.172949194	-0.078401892	0.094547302	0.535437458	0.99984053	FALSE
594	PF3D7_0520100.e1s1_8338	-0.092250889	-0.147995562	-0.055744673	0.771518451	0.99984053	FALSE
595	PF3D7_0520400.e1s1_6896	-0.146581717	-0.122900028	0.02368169	0.902210567	0.99984053	FALSE
596	PF3D7_0521200.iso1.exon1.amp1_717	-0.151444894	-0.143268561	0.008176332	0.97001003	0.99984053	FALSE
597	PF3D7_0521300.iso1.exon3.amp1_2837	0.069891551	-0.063570986	-0.133462537	0.458194988	0.99984053	FALSE
598	PF3D7_0521300.iso1.exon3.amp2_seg2_577	-0.154017752	-0.051079281	0.102938471	0.415674617	0.99984053	FALSE
599	PF3D7_0521400.1o1_8497	-0.108377541	-0.014986586	0.093390955	0.620842748	0.99984053	FALSE
600	PF3D7_0521600.iso1.exon1.amp1_1810	-0.044176332	-0.154960754	-0.110784422	0.520466765	0.99984053	FALSE
601	PF3D7_0521700.e1s1_9110	0.187369223	-0.086953799	-0.274323022	0.506560895	0.99984053	FALSE
602	PF3D7_0521800.iso1.exon1.amp1_1519	-0.285124084	-0.194997198	0.090126886	0.659624714	0.99984053	FALSE
603	PF3D7_0522400.e3s3_9155	-0.145820339	-0.099545596	0.046274743	0.763016377	0.99984053	FALSE
604	PF3D7_0522400.e4s2_8874	-0.03096612	-0.103620065	-0.072653945	0.550876018	0.99984053	FALSE
605	PF3D7_0522400.e4s3_7140	-0.153837534	-0.051843053	0.101994481	0.397578575	0.99984053	FALSE
606	PF3D7_0522500.iso1.exon1.amp1_2655	-0.207675966	-0.136704689	0.070971277	0.682587623	0.99984053	FALSE
607	PF3D7_0523100.e2s1_7775	-0.14509922	-0.099632725	0.045466494	0.777777644	0.99984053	FALSE
608	PF3D7_0523400.3o3_6752	-0.066199037	0.004497581	0.070696617	0.548937194	0.99984053	FALSE
609	PF3D7_0523800.1o1_7352	-0.163898091	-0.22077679	-0.056878699	0.81700736	0.99984053	FALSE
610	PF3D7_0524100.iso1.exon1.amp1_509	-0.215343664	-0.070480831	0.144862832	0.523934659	0.99984053	FALSE
611	PF3D7_0524100.iso1.exon1.amp2_798	-0.088316798	-0.059431268	0.02888553	0.743560208	0.99984053	FALSE
612	PF3D7_0524200.iso1.exon1.amp1_3223	-0.202231785	-0.137128685	0.065103101	0.810583272	0.99984053	FALSE
613	PF3D7_0524300.1o1_8762	-0.051493469	-0.098421438	-0.046927969	0.664621168	0.99984053	FALSE
614	PF3D7_0524400.e1s1_7190	-0.133735282	-0.101204933	0.032530349	0.860885226	0.99984053	FALSE
615	PF3D7_0524500.1o1_5233	-0.002288501	-0.144145359	-0.141856858	0.548033316	0.99984053	FALSE
616	PF3D7_0524700.1o1_6961	-0.116221758	-0.091543213	0.024678545	0.912498689	0.99984053	FALSE
617	PF3D7_0524700_8580	-0.257044573	-0.163694266	0.093350307	0.758184205	0.99984053	FALSE
618	PF3D7_0524800.iso1.exon1.amp1_2188	-0.178535947	-0.16552223	0.013013717	0.944880127	0.99984053	FALSE
619	PF3D7_0525000.1o1_7931	-0.149834547	-0.144417867	0.00541668	0.97205799	0.99984053	FALSE
620	PF3D7_0525100.e1s1_4897	-0.117252779	-0.10337301	0.013879769	0.914973494	0.99984053	FALSE
621	PF3D7_0525200.iso1.exon1.amp2_3987	-0.119934998	-0.028572307	0.091362691	0.367079744	0.99984053	FALSE
622	PF3D7_0525300.1o1_6447	-0.093073268	-0.190307992	-0.097234724	0.673442459	0.99984053	FALSE
623	PF3D7_0525800.e1s1_6607	-0.139272725	0.0241418	0.163414525	0.37183096	0.99984053	FALSE
624	PF3D7_0526200.iso2.exon7.amp1_2452	-0.233262748	-0.111625978	0.12163677	0.496057696	0.99984053	FALSE
625	PF3D7_0526600.iso1.exon1.amp4_3706	-0.071938116	-0.194333464	-0.122395347	0.447536545	0.99984053	FALSE
626	PF3D7_0526900.iso1.exon3.amp1_1800	-0.283466063	-0.07526338	0.208202683	0.386436998	0.99984053	FALSE
627	PF3D7_0527200.e2s1_8350	-0.152900217	-0.076899373	0.076000844	0.799523707	0.99984053	FALSE
628	PF3D7_0527600.6o10_4989	-0.039630343	-0.117587215	-0.077956873	0.529770306	0.99984053	FALSE
629	PF3D7_0528200.e2s1_7765	-0.333703548	-0.104444458	0.22925909	0.499123191	0.99984053	FALSE
630	PF3D7_0528300.1o1_5292	-0.1571067	-0.068789775	0.088316925	0.555519527	0.99984053	FALSE
631	PF3D7_0528400.4o8_8756	-0.253469811	-0.208060915	0.045408896	0.830420339	0.99984053	FALSE
632	PF3D7_0528500.iso1.exon5.amp1_2948	-0.29850611	-0.186240111	0.112265999	0.698966751	0.99984053	FALSE
633	PF3D7_0529000.1o1_7059	-0.062040215	-0.068280259	-0.006240043	0.96525887	0.99984053	FALSE
634	PF3D7_0529400.1.e2s1_8277	-0.177564242	-0.146553456	0.031010787	0.869469148	0.99984053	FALSE
635	PF3D7_0529400.1.e5s1_7458	-0.238766266	-0.155174373	0.083591893	0.674510683	0.99984053	FALSE
636	PF3D7_0529400.1.e7s1_6001	-0.134796001	-0.058580942	0.076215059	0.44985952	0.99984053	FALSE
637	PF3D7_0529700.iso1.exon2.amp1_3636	-0.058528317	-0.07180206	-0.013273743	0.882393215	0.99984053	FALSE
638	PF3D7_0530100.2o2_9005	-0.144706004	-0.179735404	-0.0350294	0.90085917	0.99984053	FALSE
639	PF3D7_0530900.iso1.exon1.amp1_818	-0.037415752	-0.123876011	-0.086460259	0.696042267	0.99984053	FALSE
640	PF3D7_0530900.iso1.exon1.amp2_1107	-0.054057045	-0.064744012	-0.010686966	0.924461136	0.99984053	FALSE
641	PF3D7_0530900.iso1.exon1.amp3_3077	-0.062106235	-0.028502243	0.033603991	0.664480706	0.99984053	FALSE
642	PF3D7_0531100.iso1.exon1.amp2_seg2_3774	-0.055288939	-0.056322398	-0.001033458	0.992648074	0.99984053	FALSE
643	PF3D7_0531400.iso1.exon1.amp2_1631	-0.124701889	-0.081375947	0.043325942	0.791837493	0.99984053	FALSE
644	PF3D7_0532100_6557	-0.121556773	-0.026310218	0.095246555	0.724147735	0.99984053	FALSE
645	PF3D7_0532300.e2s1_9209	-0.252962912	-0.094972887	0.157990026	0.38509714	0.99984053	FALSE
646	PF3D7_0532400.e1s1_5131	-0.232920581	0.008801862	0.241722442	0.314876783	0.99984053	FALSE
647	PF3D7_0532400.e2s1_5163	-0.107162102	-0.075576446	0.031585656	0.799234087	0.99984053	FALSE
648	PF3D7_0533100.iso1.exon1.amp1_3129	-0.067515109	-0.095418113	-0.027903004	0.770579736	0.99984053	FALSE
649	PF3D7_0533100.iso1.exon1.amp2_3418	-0.195801873	-0.128081225	0.067720648	0.52512027	0.99984053	FALSE
650	PF3D7_0533100.iso1.exon1.amp3_1389	-0.100506534	-0.051949792	0.048556742	0.368572512	0.99984053	FALSE
651	PF3D7_0600200.iso1.exon1.amp3_1938	-0.095544695	-0.117007803	-0.021463108	0.856550896	0.99984053	FALSE
652	PF3D7_0600300.iso1.exon1.amp1_1286	-0.343337467	-0.264222677	0.07911479	0.768181019	0.99984053	FALSE
653	PF3D7_0600400.iso1.exon1.amp1_3033	0.067132122	0.007204959	-0.059927163	0.796477017	0.99984053	FALSE
654	PF3D7_0600400.iso1.exon2.amp1_1895	-0.218065818	-0.094343942	0.123721876	0.416290418	0.99984053	FALSE
655	PF3D7_0600500.iso1.exon2.amp1_130	-0.295383333	-0.203343043	0.09204029	0.744607834	0.99984053	FALSE
656	PF3D7_0600700.iso1.exon1.amp1_4469	-0.306732219	-0.303295766	0.003436453	0.989421009	0.99984053	FALSE
657	PF3D7_0601000.iso1.exon1.amp1_3293	-0.210682784	-0.135250946	0.075431837	0.560166919	0.99984053	FALSE
658	PF3D7_0601200.iso1.exon2.amp1_695	-0.306490621	-0.28443476	0.022055861	0.914597942	0.99984053	FALSE
659	PF3D7_0601500.iso1.exon1.amp1_4480	-0.170982362	-0.073657411	0.097324951	0.409143158	0.99984053	FALSE
660	PF3D7_0601700.2o2_6415	0.048010791	0.13374865	0.085737859	0.537311091	0.99984053	FALSE
661	PF3D7_0602000.iso1.exon1.amp2_4515	-0.116483237	-0.207633314	-0.091150076	0.698527709	0.99984053	FALSE
662	PF3D7_0602100.iso1.exon1.amp1_1671	-0.1537793	-0.257642582	-0.103863282	0.541187664	0.99984053	FALSE
663	PF3D7_0602100.iso1.exon1.amp2_1960	-0.190747572	-0.178825977	0.011921595	0.943007029	0.99984053	FALSE
664	PF3D7_0602200.1o3_6695	-0.151818776	-0.055356417	0.096462359	0.423440531	0.99984053	FALSE
665	PF3D7_0602600.iso1.exon3.amp1_4131	-0.237930388	0.062428757	0.300359145	0.327825602	0.99984053	FALSE
666	PF3D7_0602600.iso1.exon4.amp1_377	-0.191405963	-0.112908754	0.078497209	0.556978733	0.99984053	FALSE
667	PF3D7_0602700.iso1.exon1.amp1_1591	-0.16263926	-0.06430254	0.09833672	0.508706767	0.99984053	FALSE
668	PF3D7_0603100.1o1_7881	-0.045273682	-0.105732048	-0.060458366	0.551903904	0.99984053	FALSE
669	PF3D7_0603300.iso1.exon1.amp1_2181	-0.224028034	-0.03972246	0.184305574	0.231227352	0.99984053	FALSE
670	PF3D7_0603800.16o20_7091	-0.086013975	0.122686139	0.208700114	0.129973747	0.99984053	FALSE
671	PF3D7_0604000.iso1.exon1.amp1_1983	-0.08441585	-0.120687798	-0.036271948	0.851999684	0.99984053	FALSE
672	PF3D7_0604000.iso1.exon1.amp3_760	-0.03996879	-0.046203541	-0.006234751	0.967220731	0.99984053	FALSE
673	PF3D7_0604100.iso1.exon1.amp2_3651	-0.102004727	-0.190662344	-0.088657617	0.68397221	0.99984053	FALSE
674	PF3D7_0604500.iso1.exon1.amp3_3986	-0.202827579	-0.235415141	-0.032587562	0.921811513	0.99984053	FALSE
675	PF3D7_0605000.iso1.exon1.amp1_1561	-0.122828431	-0.104182214	0.018646217	0.937897387	0.99984053	FALSE
676	PF3D7_0605500.iso1.exon2.amp1_4494	-0.161113001	0.000800498	0.1619135	0.163662775	0.99984053	FALSE
677	PF3D7_0605600.iso1.exon1.amp1_3384	-0.274137873	-0.178235459	0.095902414	0.499867861	0.99984053	FALSE
678	PF3D7_0605600.iso1.exon1.amp2_2481	-0.064660016	-0.021575663	0.043084353	0.760697837	0.99984053	FALSE
679	PF3D7_0605600.iso1.exon4.amp1_4428	-0.173214386	-0.096907865	0.076306521	0.565562517	0.99984053	FALSE
680	PF3D7_0606000.iso1.exon1.amp2_2795	0.040194099	-0.159048751	-0.19924285	0.310282413	0.99984053	FALSE
681	PF3D7_0606100.iso1.exon4.amp1_4473	-0.115449223	0.039554189	0.155003412	0.384406634	0.99984053	FALSE
682	PF3D7_0606500.iso1.exon5.amp1_1589	-0.199146872	-0.225605073	-0.026458201	0.922994607	0.99984053	FALSE
683	PF3D7_0606600.iso1.exon2.amp1_2254	-0.101657884	-0.058432689	0.043225195	0.595796652	0.99984053	FALSE
684	PF3D7_0606700.iso1.exon1.amp1_3408	-0.202047811	-0.158814373	0.043233438	0.84919479	0.99984053	FALSE
685	PF3D7_0606800.1o1_4981	-0.239057485	-0.101655685	0.1374018	0.469674745	0.99984053	FALSE
686	PF3D7_0607300.2o2_5577	-0.015673105	-0.062031096	-0.046357991	0.703777873	0.99984053	FALSE
687	PF3D7_0607600.1o5_6489	-0.13402293	-0.21776024	-0.08373731	0.668455091	0.99984053	FALSE
688	PF3D7_0607700.iso1.exon1.amp2_seg1_2869	-0.192141869	-0.128695643	0.063446226	0.717627383	0.99984053	FALSE
689	PF3D7_0608100.iso1.exon1.amp1_4297	-0.094631337	-0.095730462	-0.001099125	0.993244399	0.99984053	FALSE
690	PF3D7_0608100.iso1.exon1.amp2_2496	0.009917111	-0.077319341	-0.087236452	0.537149626	0.99984053	FALSE
691	PF3D7_0608310.iso1.exon3.amp1_440	-0.211389463	-0.197522118	0.013867344	0.943043239	0.99984053	FALSE
692	PF3D7_0608400.iso1.exon2.amp1_1521	-0.223578783	-0.306642535	-0.083063752	0.599360002	0.99984053	FALSE
693	PF3D7_0608500.2o2_7844	-0.088626645	-0.130883488	-0.042256843	0.809124588	0.99984053	FALSE
694	PF3D7_0609000.iso1.exon1.amp1_3985	-0.123837498	-0.24788255	-0.124045052	0.492346531	0.99984053	FALSE
695	PF3D7_0609000.iso1.exon1.amp2_4274	-0.187345702	-0.252325393	-0.06497969	0.850803584	0.99984053	FALSE
696	PF3D7_0609300.iso1.exon1.amp1_745	-0.014435882	-0.148822298	-0.134386416	0.276135493	0.99984053	FALSE
697	PF3D7_0609900.iso1.exon1.amp2_2850	-0.080439185	-0.12643022	-0.045991035	0.735903683	0.99984053	FALSE
698	PF3D7_0610000.iso1.exon2.amp1_2117	-0.134349667	-0.032637122	0.101712545	0.356028018	0.99984053	FALSE
699	PF3D7_0610200.1o1_5636	-0.09246584	-0.131057037	-0.038591196	0.845247485	0.99984053	FALSE
700	PF3D7_0611800.iso1.exon5.amp1_seg1_1151	-0.078682033	-0.039277158	0.039404876	0.551679903	0.99984053	FALSE
701	PF3D7_0611800.iso1.exon5.amp3_508	-0.08995349	-0.316130164	-0.226176674	0.285773566	0.99984053	FALSE
702	PF3D7_0611900.iso1.exon1.amp1_2690	-0.276073589	-0.035717423	0.240356166	0.125807808	0.99984053	FALSE
703	PF3D7_0612700.1o1_6423	-0.178885018	-0.078546845	0.100338173	0.617641348	0.99984053	FALSE
704	PF3D7_0613300.iso1.exon3.amp1_635	-0.200939379	-0.1190444	0.081894979	0.59425274	0.99984053	FALSE
705	PF3D7_0613300.iso1.exon5.amp1_2341	-0.180121304	-0.159912239	0.020209065	0.931004641	0.99984053	FALSE
706	PF3D7_0613900.iso1.exon1.amp2_2265	-0.230984205	-0.134477563	0.096506642	0.399044024	0.99984053	FALSE
707	PF3D7_0614000.iso1.exon1.amp1_157	-0.153732891	-0.052778785	0.100954106	0.5072492	0.99984053	FALSE
708	PF3D7_0614400.1o1_8430	0.009723308	-0.120452827	-0.130176136	0.364847644	0.99984053	FALSE
709	PF3D7_0614800.iso1.exon1.amp1_433	0.014258616	-0.206058861	-0.220317477	0.204353617	0.99984053	FALSE
710	PF3D7_0615100.1o1_7590	-0.014464487	-0.054493787	-0.0400293	0.761914142	0.99984053	FALSE
711	PF3D7_0615600.5o8_7086	-0.118187145	-0.078689883	0.039497262	0.690616565	0.99984053	FALSE
712	PF3D7_0615800.2o3_6521	-0.088420022	-0.088297126	0.000122896	0.999240537	0.99984053	FALSE
713	PF3D7_0616000.1o3_5009	-0.113088263	-0.05771848	0.055369783	0.679844663	0.99984053	FALSE
714	PF3D7_0616300.iso1.exon1.amp1_967	-0.116149857	-0.153832211	-0.037682354	0.856296298	0.99984053	FALSE
715	PF3D7_0616800.iso1.exon1.amp1_2475	-0.044316804	-0.014934484	0.02938232	0.85163723	0.99984053	FALSE
716	PF3D7_0617000.1o1_8750	-0.097654674	-0.149737915	-0.052083241	0.615462584	0.99984053	FALSE
717	PF3D7_0617400.s3 (renamed)_7396	-0.133299934	-0.142979139	-0.009679206	0.944680588	0.99984053	FALSE
718	PF3D7_0617600.iso1.exon1.amp1_3292	-0.375235693	-0.310084839	0.065150854	0.775382503	0.99984053	FALSE
719	PF3D7_0617700.iso1.exon1.amp1_3596	-0.097471692	-0.293024557	-0.195552865	0.334515282	0.99984053	FALSE
720	PF3D7_0618500.1o1_6121	-0.18945365	-0.102083322	0.087370328	0.57347343	0.99984053	FALSE
721	PF3D7_0618700.1o2_6708	-0.105480648	-0.104825157	0.000655492	0.996249765	0.99984053	FALSE
722	PF3D7_0618900.2o10_5031	-0.049471848	-0.04916659	0.000305258	0.997607428	0.99984053	FALSE
723	PF3D7_0618900.iso2.exon2.amp1_2167	-0.060189316	0.027439054	0.08762837	0.713158253	0.99984053	FALSE
724	PF3D7_0619000.1.12o14_6224	-0.260514455	-0.20027586	0.060238595	0.757047029	0.99984053	FALSE
725	PF3D7_0619000.1.e12_5382	-0.151306364	-0.10627321	0.045033154	0.786489054	0.99984053	FALSE
726	PF3D7_0619000.1.s1 (renamed)_5662	-0.036761276	-0.020099537	0.016661739	0.86651591	0.99984053	FALSE
727	PF3D7_0619000.iso2.exon13.amp1_3564	-0.22165005	-0.169658329	0.051991721	0.808971532	0.99984053	FALSE
728	PF3D7_0619400.iso1.exon1.amp1_727	-0.243998752	-0.095789344	0.148209407	0.1896307	0.99984053	FALSE
729	PF3D7_0619400.iso1.exon2.amp1_2684	-0.257562603	-0.181213495	0.076349109	0.763393507	0.99984053	FALSE
730	PF3D7_0619700.iso1.exon2.amp1_2417	-0.060668247	0.048410964	0.109079211	0.417907506	0.99984053	FALSE
731	PF3D7_0619900.iso1.exon1.amp1_2419	-0.178553653	-0.078092406	0.100461246	0.501138622	0.99984053	FALSE
732	PF3D7_0620000.1o1_5588	-0.103314934	-0.075551242	0.027763692	0.849724019	0.99984053	FALSE
733	PF3D7_0620100.2o2_6690	-0.092677596	-0.114978395	-0.022300799	0.910448862	0.99984053	FALSE
734	PF3D7_0620200.1o1_6128	-0.215349427	-0.314469368	-0.099119941	0.777715762	0.99984053	FALSE
735	PF3D7_0620400.1o1_7613	-0.160301097	0.053654026	0.213955123	0.347620248	0.99984053	FALSE
736	PF3D7_0620600.1o1_5842	-0.17434627	-0.091137079	0.083209191	0.67692538	0.99984053	FALSE
737	PF3D7_0621200.iso1.exon1.amp1_1855	-0.207393352	-0.134591868	0.072801484	0.737004394	0.99984053	FALSE
738	PF3D7_0621400.1o1_8784	-0.106473195	-0.129706632	-0.023233438	0.830910005	0.99984053	FALSE
739	PF3D7_0621900.1o1_7648	-0.238576726	-0.217604408	0.020972319	0.941980102	0.99984053	FALSE
740	PF3D7_0622000.iso1.exon1.amp1_2087	-0.298593124	-0.150231265	0.148361859	0.468167633	0.99984053	FALSE
741	PF3D7_0622000.iso1.exon3.amp1_2970	-0.147314092	-0.112369015	0.034945077	0.795271542	0.99984053	FALSE
742	PF3D7_0622100.iso1.exon1.amp1_seg1_3159	-0.23294836	-0.129345521	0.103602839	0.515934685	0.99984053	FALSE
743	PF3D7_0622100.iso1.exon1.amp2_seg2_2303	-0.098313943	-0.083549824	0.014764119	0.887644623	0.99984053	FALSE
744	PF3D7_0622800.s1 (renamed)_4799	-0.167651708	-0.161951383	0.005700325	0.977614437	0.99984053	FALSE
745	PF3D7_0622800.s2 (renamed)_5666	-0.000429968	-0.02858647	-0.028156502	0.851894845	0.99984053	FALSE
746	PF3D7_0623300.iso1.exon4.amp1_75	-0.062404912	-0.037401712	0.0250032	0.711191568	0.99984053	FALSE
747	PF3D7_0623400.1o1_5006	-0.052834532	-0.086328211	-0.03349368	0.754544887	0.99984053	FALSE
748	PF3D7_0623700.iso1.exon1.amp2_4528	-0.122312823	-0.149154071	-0.026841248	0.895100456	0.99984053	FALSE
749	PF3D7_0623800.iso1.exon1.amp3_470	0.027412519	-0.0933827	-0.120795219	0.292496326	0.99984053	FALSE
750	PF3D7_0623900.1o1_5269	-0.025086977	-0.009033257	0.01605372	0.88939522	0.99984053	FALSE
751	PF3D7_0624500.iso1.exon1.amp1_1536	-0.176474476	-0.109988445	0.06648603	0.624885496	0.99984053	FALSE
752	PF3D7_0624600.iso1.exon1.amp2_2263	-0.159273792	-0.118977064	0.040296728	0.82792761	0.99984053	FALSE
753	PF3D7_0624900.iso1.exon8.amp1_2391	-0.132082408	-0.046766657	0.085315751	0.460035918	0.99984053	FALSE
754	PF3D7_0625000.iso2.exon1.amp1_1527	0.060303377	-0.092090186	-0.152393563	0.656914179	0.99984053	FALSE
755	PF3D7_0625400.1o1_5288	-0.073093538	-0.067516259	0.005577279	0.962461866	0.99984053	FALSE
756	PF3D7_0625500.1o1_7006	-0.094866259	-0.093366252	0.001500006	0.992571558	0.99984053	FALSE
757	PF3D7_0625600.1o1_7626	-0.138177235	-0.08257604	0.055601196	0.757261101	0.99984053	FALSE
758	PF3D7_0626100.iso1.exon2.amp1_4098	-0.330137823	-0.099770029	0.230367794	0.40618083	0.99984053	FALSE
759	PF3D7_0626600.1o1_6969	-0.201031673	-0.10437921	0.096652464	0.680168671	0.99984053	FALSE
760	PF3D7_0626800.iso1.exon1.amp1_2938	-0.321234708	-0.141635346	0.179599363	0.5395549	0.99984053	FALSE
761	PF3D7_0626800.iso1.exon2.amp1_1841	-0.197924186	-0.162263343	0.035660844	0.825084537	0.99984053	FALSE
762	PF3D7_0626800.iso1.exon3.amp1_689	-0.278333688	-0.292117089	-0.0137834	0.953751169	0.99984053	FALSE
763	PF3D7_0626900.1o1_4986	-0.026963003	-0.161349419	-0.134386416	0.457308631	0.99984053	FALSE
764	PF3D7_0627000.1o1_6672	0.160449047	-0.08566373	-0.246112777	0.17587044	0.99984053	FALSE
765	PF3D7_0627100.iso1.exon1.amp1_4595	-0.084853515	-0.341664301	-0.256810786	0.305459834	0.99984053	FALSE
766	PF3D7_0627400.1o1_5247	-0.205322793	-0.18371148	0.021611312	0.931637919	0.99984053	FALSE
767	PF3D7_0628000.1o1_7263	-0.221199374	-0.205697068	0.015502306	0.958899508	0.99984053	FALSE
768	PF3D7_0628100.iso1.exon1.amp10_2250	-0.117967864	-0.173792294	-0.055824429	0.69285437	0.99984053	FALSE
769	PF3D7_0628100.iso1.exon1.amp11_1613	-0.116979722	-0.130341642	-0.01336192	0.947339884	0.99984053	FALSE
770	PF3D7_0628100.iso1.exon1.amp6_2244	-0.203386273	-0.053740332	0.149645941	0.140045219	0.99984053	FALSE
771	PF3D7_0628100.iso1.exon1.amp7_1383	-0.09438341	-0.127739962	-0.033356552	0.78462642	0.99984053	FALSE
772	PF3D7_0628100.iso1.exon1.amp9_1961	-0.188386386	-0.140965859	0.047420527	0.789648172	0.99984053	FALSE
773	PF3D7_0628200.s1_6574	-0.216750797	-0.032644627	0.184106171	0.437927004	0.99984053	FALSE
774	PF3D7_0628200.s2 (renamed)_6863	-0.141133392	-0.230408037	-0.089274645	0.618623777	0.99984053	FALSE
775	PF3D7_0628600.iso1.exon3.amp1_4371	-0.279522376	-0.116158042	0.163364335	0.393036055	0.99984053	FALSE
776	PF3D7_0629000.iso1.exon1.amp1_120	-0.23475203	-0.202442381	0.032309648	0.850550201	0.99984053	FALSE
777	PF3D7_0629300.1o1_7935	-0.116827855	-0.136161618	-0.019333764	0.883595055	0.99984053	FALSE
778	PF3D7_0629500.1o2_8488	-0.143921523	-0.080844637	0.063076886	0.648777826	0.99984053	FALSE
779	PF3D7_0629600.iso1.exon2.amp1_3286	-0.159724836	-0.073874531	0.085850306	0.201719381	0.99984053	FALSE
780	PF3D7_0629700.s3 (renamed)_7149	-0.090971868	-0.131221421	-0.040249553	0.825016412	0.99984053	FALSE
781	PF3D7_0629700.s5 (renamed)_7727	-0.098613945	-0.075036371	0.023577574	0.892793692	0.99984053	FALSE
782	PF3D7_0629900.iso1.exon1.amp1_3279	-0.277370041	-0.109430096	0.167939945	0.448027128	0.99984053	FALSE
783	PF3D7_0630300.iso1.exon2.amp3_4257	-0.136599001	-0.099445043	0.037153958	0.881060492	0.99984053	FALSE
784	PF3D7_0630600.2o2_8237	-0.10299342	-0.122074962	-0.019081542	0.903963904	0.99984053	FALSE
785	PF3D7_0631000.iso1.exon1.amp1_2426	-0.129691233	-0.168351413	-0.038660179	0.773494147	0.99984053	FALSE
786	PF3D7_0631100.iso1.exon2.amp1_1011	-0.255604204	-0.135692754	0.11991145	0.589250318	0.99984053	FALSE
787	PF3D7_0631400.iso1.exon1.amp1_1562	-0.233884122	-0.240159382	-0.00627526	0.975719389	0.99984053	FALSE
788	PF3D7_0631800.iso1.exon2.amp1_3318	-0.147544187	-0.207656774	-0.060112587	0.754620403	0.99984053	FALSE
789	PF3D7_0631900.iso1.exon2.amp1_3298	-0.193734332	-0.288662633	-0.094928301	0.627409268	0.99984053	FALSE
790	PF3D7_0632000.iso1.exon2.amp1_3020	-0.28774685	-0.273222156	0.014524694	0.956638866	0.99984053	FALSE
791	PF3D7_0632100.iso1.exon1.amp1_705	-0.08765272	-0.158488037	-0.070835316	0.541455418	0.99984053	FALSE
792	PF3D7_0632200.iso1.exon1.amp1_3015	-0.248252349	-0.257620125	-0.009367776	0.973240798	0.99984053	FALSE
793	PF3D7_0632300.iso1.exon2.amp1_423	-0.090667312	-0.210777378	-0.120110066	0.477732851	0.99984053	FALSE
794	PF3D7_0632400.iso1.exon2.amp1_3304	-0.375256851	-0.292159456	0.083097396	0.803158714	0.99984053	FALSE
795	PF3D7_0632500.iso1.exon1.amp1_3326	-0.454630181	-0.389004109	0.065626072	0.821546204	0.99984053	FALSE
796	PF3D7_0632500.iso1.exon2.amp1_1064	-0.284317374	-0.158008041	0.126309333	0.517844448	0.99984053	FALSE
797	PF3D7_0632500.iso1.exon2.amp3_492	-0.112357612	-0.060226606	0.052131006	0.688806231	0.99984053	FALSE
798	PF3D7_0632500.iso1.exon2.amp4_seg2_4605	-0.12562498	-0.057287442	0.068337538	0.462070642	0.99984053	FALSE
799	PF3D7_0632700.iso1.exon2.amp1_2437	-0.254525126	-0.22770747	0.026817656	0.907522962	0.99984053	FALSE
800	PF3D7_0632800.iso1.exon1.amp1_4482	-0.244505943	-0.237408473	0.00709747	0.961660398	0.99984053	FALSE
801	PF3D7_0700100.iso1.exon3.amp1_1301	-0.136971937	-0.272466132	-0.135494196	0.443070179	0.99984053	FALSE
802	PF3D7_0700200.iso1.exon3.amp1_994	-0.177947623	-0.175448592	0.002499031	0.989016145	0.99984053	FALSE
803	PF3D7_0700300.iso1.exon3.amp1_3589	-0.178026023	-0.093572098	0.084453925	0.528376305	0.99984053	FALSE
804	PF3D7_0700400.iso1.exon3.amp1_4165	-0.312557003	-0.207731927	0.104825075	0.630928461	0.99984053	FALSE
805	PF3D7_0700500.iso1.exon3.amp1_2741	-0.152865907	-0.262135759	-0.109269852	0.611040374	0.99984053	FALSE
806	PF3D7_0701000.1o1_5806	-0.169235869	-0.16588267	0.003353199	0.987699394	0.99984053	FALSE
807	PF3D7_0701100.iso1.exon3.amp1_2151	-0.378660316	-0.374704837	0.003955479	0.990180113	0.99984053	FALSE
808	PF3D7_0701600.iso1.exon2.amp1_4435	-0.282105145	-0.229442664	0.05266248	0.820677717	0.99984053	FALSE
809	PF3D7_0701800.iso1.exon1.amp1_3301	-0.24475701	-0.265333184	-0.020576174	0.911853871	0.99984053	FALSE
810	PF3D7_0701900.e2s1_9111	0.003579392	-0.034818846	-0.038398238	0.835261293	0.99984053	FALSE
811	PF3D7_0702200.1o1_5873	-0.205797076	-0.145914841	0.059882236	0.724655534	0.99984053	FALSE
812	PF3D7_0702300.2o2_7331	-0.257339012	0.010324612	0.267663624	0.443846214	0.99984053	FALSE
813	PF3D7_0702300.e2_6828	-0.127989378	-0.068980292	0.059009087	0.712956046	0.99984053	FALSE
814	PF3D7_0702400.e1s1_8040	-0.230204619	-0.224496037	0.005708582	0.981051418	0.99984053	FALSE
815	PF3D7_0702500.e1s1_8598	-0.202095489	-0.137079981	0.065015508	0.787607587	0.99984053	FALSE
816	PF3D7_0702600.iso1.exon1.amp1_3842	-0.098705116	-0.072233939	0.026471177	0.877707876	0.99984053	FALSE
817	PF3D7_0703100.1o1_5246	-0.273235166	-0.223611182	0.049623984	0.874555857	0.99984053	FALSE
818	PF3D7_0703200.iso1.exon1.amp1_4307	-0.096894018	-0.012085343	0.084808675	0.558176581	0.99984053	FALSE
819	PF3D7_0703300.iso1.exon1.amp1_3572	-0.01508704	-0.036143112	-0.021056072	0.802999868	0.99984053	FALSE
820	PF3D7_0703500.e2s2_7503	-0.314182548	-0.254597648	0.059584899	0.846486828	0.99984053	FALSE
821	PF3D7_0703700.e1s1_8629	-0.241114851	-0.213382707	0.027732144	0.897957239	0.99984053	FALSE
822	PF3D7_0704000.iso1.exon1.amp1_seg1_3736	-0.146798307	-0.159575505	-0.012777198	0.962062537	0.99984053	FALSE
823	PF3D7_0704200.iso1.exon1.amp1_252	-0.109660437	-0.062515439	0.047144998	0.604262497	0.99984053	FALSE
824	PF3D7_0704200.iso1.exon1.amp2_769	-0.16797805	-0.149216219	0.01876183	0.908993042	0.99984053	FALSE
825	PF3D7_0704300.s1_6860	-0.117859407	-0.135631849	-0.017772442	0.856737515	0.99984053	FALSE
826	PF3D7_0704500.iso1.exon1.amp2_178	-0.019144365	-0.126854645	-0.10771028	0.470820812	0.99984053	FALSE
827	PF3D7_0704600.iso1.exon5.amp3_seg1_283	-0.038563643	-0.108745885	-0.070182242	0.696579052	0.99984053	FALSE
828	PF3D7_0704800.iso1.exon1.amp1_3430	-0.120716908	-0.054736516	0.065980392	0.551163943	0.99984053	FALSE
829	PF3D7_0704800.iso1.exon1.amp2_1629	-0.042466217	-0.118225083	-0.075758865	0.532915468	0.99984053	FALSE
830	PF3D7_0704900.iso1.exon1.amp1_3311	-0.202170269	-0.139812556	0.062357713	0.640408135	0.99984053	FALSE
831	PF3D7_0705000.e1s1_7991	-0.103242547	-0.158161948	-0.054919401	0.732318692	0.99984053	FALSE
832	PF3D7_0705000.e1s2_6251	-0.114793574	-0.008321858	0.106471716	0.171470711	0.99984053	FALSE
833	PF3D7_0705500.iso1.exon2.amp2_3383	-0.106445567	-0.166206728	-0.059761161	0.834102064	0.99984053	FALSE
834	PF3D7_0705500.iso1.exon2.amp3_1354	-0.089486543	-0.189987798	-0.100501255	0.368894413	0.99984053	FALSE
835	PF3D7_0705600.iso1.exon1.amp2_4245	-0.188428621	-0.114303767	0.074124854	0.525314852	0.99984053	FALSE
836	PF3D7_0706500.iso1.exon1.amp1_3144	-0.05496536	-0.128451806	-0.073486446	0.775949928	0.99984053	FALSE
837	PF3D7_0706700.1o1_8234	-0.260285364	-0.139714735	0.120570629	0.606481957	0.99984053	FALSE
838	PF3D7_0707200.iso1.exon1.amp1_1982	-0.114919756	-0.034886179	0.080033577	0.274890955	0.99984053	FALSE
839	PF3D7_0707300.2o5_6209	-0.41794915	-0.049218492	0.368730658	0.240989192	0.99984053	FALSE
840	PF3D7_0707400.iso1.exon1.amp1_1310	0.015767838	-0.129067776	-0.144835614	0.351009716	0.99984053	FALSE
841	PF3D7_0707500.iso1.exon1.amp2_467	-0.128490324	-0.139017042	-0.010526718	0.939594784	0.99984053	FALSE
842	PF3D7_0707700.1o1_5353	-0.138579448	-0.281170976	-0.142591528	0.5667634	0.99984053	FALSE
843	PF3D7_0708000.e1s1_9235	-0.156825772	-0.115969331	0.040856441	0.81232101	0.99984053	FALSE
844	PF3D7_0708000.e2s1_8905	-0.142519285	-0.10474894	0.037770344	0.780002547	0.99984053	FALSE
845	PF3D7_0708400.e1_5679	-0.143778852	-0.050319867	0.093458985	0.456580526	0.99984053	FALSE
846	PF3D7_0708400.e2_6536	-0.123653689	-0.075977183	0.047676506	0.773141407	0.99984053	FALSE
847	PF3D7_0709000.e3s1_5972	-0.355905994	-0.090761671	0.265144323	0.299758142	0.99984053	FALSE
848	PF3D7_0709100.e1s1_4890	-0.120269614	-0.167691523	-0.047421909	0.792913008	0.99984053	FALSE
849	PF3D7_0709300.iso1.exon1.amp3_2493	-0.148632799	-0.066071005	0.082561794	0.666777249	0.99984053	FALSE
850	PF3D7_0709400.iso1.exon2.amp1_2171	-0.177923911	-0.205344295	-0.027420384	0.911940746	0.99984053	FALSE
851	PF3D7_0709700.e1s1_7479	-0.125172576	-0.050450763	0.074721813	0.659279269	0.99984053	FALSE
852	PF3D7_0709900.3o3_8531	-0.158137982	-0.095631114	0.062506868	0.735505406	0.99984053	FALSE
853	PF3D7_0709900.e1s2_8563	-0.088820769	-0.18532958	-0.096508811	0.433232889	0.99984053	FALSE
854	PF3D7_0709900.e2_7429	-0.135924569	-0.014060606	0.121863964	0.444554794	0.99984053	FALSE
855	PF3D7_0709900.e3_5674	-0.098446931	-0.047804719	0.050642212	0.812009435	0.99984053	FALSE
856	PF3D7_0710200.iso1.exon1.amp2_seg1_3742	-0.311727321	-0.108663104	0.203064217	0.301026257	0.99984053	FALSE
857	PF3D7_0710200.iso1.exon1.amp3_3649	0.017335233	-0.092826425	-0.110161659	0.349568316	0.99984053	FALSE
858	PF3D7_0710300.iso1.exon2.amp1_2630	-0.243960295	-0.101475053	0.142485243	0.51712811	0.99984053	FALSE
859	PF3D7_0710400_9160	-0.242034652	-0.320327558	-0.078292905	0.792666335	0.99984053	FALSE
860	PF3D7_0710500.iso1.exon5.amp1_1229	-0.050645083	0.035135945	0.085781028	0.317212288	0.99984053	FALSE
861	PF3D7_0711000.e1s1_7491	-0.231068501	-0.004915012	0.226153489	0.337619466	0.99984053	FALSE
862	PF3D7_0711000.e1s2_8942	-0.102448388	-0.02035969	0.082088699	0.43434236	0.99984053	FALSE
863	PF3D7_0711100.iso1.exon1.amp1_1552	-0.056346956	-0.232857917	-0.176510961	0.306444519	0.99984053	FALSE
864	PF3D7_0711200.iso1.exon1.amp1_2331	0.160263059	-0.030563435	-0.190826494	0.178041763	0.99984053	FALSE
865	PF3D7_0711300.iso1.exon1.amp1_3846	-0.100399712	-0.19904327	-0.098643558	0.456815107	0.99984053	FALSE
866	PF3D7_0711700.e2s1_5452	-0.104819585	-0.10685585	-0.002036265	0.990201714	0.99984053	FALSE
867	PF3D7_0712000.iso1.exon1.amp1_145	-0.069991247	-0.186707798	-0.116716551	0.653492801	0.99984053	FALSE
868	PF3D7_0712300.iso1.exon1.amp1_3615	-0.064350342	-0.1906908	-0.126340457	0.564429952	0.99984053	FALSE
869	PF3D7_0712400.iso1.exon1.amp1_1004	-0.08114381	-0.129094632	-0.047950822	0.764460038	0.99984053	FALSE
870	PF3D7_0712400.iso1.exon2.amp2_2529	-0.082335189	-0.116296111	-0.033960923	0.809250134	0.99984053	FALSE
871	PF3D7_0712600.iso1.exon1.amp1_434	-0.113050355	-0.200887122	-0.087836767	0.686973789	0.99984053	FALSE
872	PF3D7_0712800.iso1.exon1.amp1_3904	-0.067627503	-0.128038396	-0.060410893	0.787348645	0.99984053	FALSE
873	PF3D7_0712800.iso1.exon2.amp2_1944	-0.119934046	-0.109171341	0.010762705	0.944424765	0.99984053	FALSE
874	PF3D7_0712900.iso1.exon1.amp1_3316	-0.105935272	-0.261889755	-0.155954483	0.5584723	0.99984053	FALSE
875	PF3D7_0712900.iso1.exon2.amp2_215	-0.004636836	-0.080207615	-0.07557078	0.490228835	0.99984053	FALSE
876	PF3D7_0713000.iso1.exon2.amp1_2451	-0.071156858	-0.064481261	0.006675596	0.932072887	0.99984053	FALSE
877	PF3D7_0713100.2o2_5537	-0.12339287	-0.07365398	0.04973889	0.691162434	0.99984053	FALSE
878	PF3D7_0713600.iso1.exon1.amp1_3623	-0.152925067	-0.129490198	0.023434868	0.890996633	0.99984053	FALSE
879	PF3D7_0713900.e1s1_5647	-0.087767446	-0.091136524	-0.003369079	0.985555048	0.99984053	FALSE
880	PF3D7_0713900.e1s3_8249	-0.122436922	-0.23574348	-0.113306558	0.579979228	0.99984053	FALSE
881	PF3D7_0713900.e1s4_5937	-0.306160999	-0.224677275	0.081483724	0.816541759	0.99984053	FALSE
882	PF3D7_0714000.e1s1_6579	-0.079318222	-0.112457119	-0.033138897	0.847378376	0.99984053	FALSE
883	PF3D7_0714200.iso1.exon1.amp2_463	0.001410259	-0.200414939	-0.201825199	0.246820375	0.99984053	FALSE
884	PF3D7_0715000.1o1_5833	-0.16193296	-0.030165009	0.131767951	0.442242826	0.99984053	FALSE
885	PF3D7_0715300.1o3_4714	-0.104657029	-0.05974561	0.044911419	0.670894757	0.99984053	FALSE
886	PF3D7_0715600.1o1_6202	-0.078598035	-0.076128829	0.002469206	0.983646502	0.99984053	FALSE
887	PF3D7_0715800.1o1_6729	-0.15676565	-0.10531194	0.05145371	0.814335483	0.99984053	FALSE
888	PF3D7_0716200.1o1_8223	0.036001269	-0.130108136	-0.166109405	0.238770369	0.99984053	FALSE
889	PF3D7_0716300.e1s1_8921	-0.064948252	-0.152277567	-0.087329314	0.632921734	0.99984053	FALSE
890	PF3D7_0717000.iso1.exon2.amp1_1484	-0.308939222	-0.103507989	0.205431233	0.384109697	0.99984053	FALSE
891	PF3D7_0717200.1o2_8169	-0.127754014	-0.175621649	-0.047867636	0.832752709	0.99984053	FALSE
892	PF3D7_0717300.1o4_7894	-0.167935793	-0.146116593	0.0218192	0.932006986	0.99984053	FALSE
893	PF3D7_0717500.e1s1_5155	-0.209473639	-0.215305701	-0.005832062	0.982419279	0.99984053	FALSE
894	PF3D7_0717700.e1s1_9221	-0.100581646	0.013002919	0.113584565	0.26293636	0.99984053	FALSE
895	PF3D7_0718000.e11s1_8030	-0.237769533	-0.101338929	0.136430604	0.569202823	0.99984053	FALSE
896	PF3D7_0718000.e4s1_4866	-0.262241506	-0.142942228	0.119299278	0.588170472	0.99984053	FALSE
897	PF3D7_0718000.e5s1_8036	-0.144956961	-0.101461876	0.043495085	0.846833033	0.99984053	FALSE
898	PF3D7_0718000.e9s3_8251	-0.150615595	-0.100136496	0.050479099	0.780422157	0.99984053	FALSE
899	PF3D7_0718000.e9s4_5939	-0.235374154	-0.101256678	0.134117476	0.340851346	0.99984053	FALSE
900	PF3D7_0718100.iso1.exon1.amp2_1370	-0.077821463	-0.096910995	-0.019089531	0.896952295	0.99984053	FALSE
901	PF3D7_0718300.e5s1_8050	0.007033844	-0.12421505	-0.131248894	0.342998895	0.99984053	FALSE
902	PF3D7_0718300.e7s1_4783	-0.212929834	-0.107369983	0.105559851	0.695559967	0.99984053	FALSE
903	PF3D7_0718600.iso1.exon6.amp1_3617	-0.1692345	-0.080277281	0.088957219	0.577436381	0.99984053	FALSE
904	PF3D7_0718600.iso1.exon8.amp1_4159	-0.089313375	-0.086207154	0.003106221	0.983649944	0.99984053	FALSE
905	PF3D7_0718800.iso1.exon4.amp1_3221	-0.303063382	-0.144964176	0.158099206	0.439857427	0.99984053	FALSE
906	PF3D7_0719000.1o1_5524	0.033648433	-0.026114726	-0.059763158	0.713033238	0.99984053	FALSE
907	PF3D7_0719100.iso1.exon2.amp1_947	-0.140518326	-0.154413817	-0.013895491	0.941536913	0.99984053	FALSE
908	PF3D7_0719200.e1s1_7415	-0.268865659	-0.069371865	0.199493794	0.409131471	0.99984053	FALSE
909	PF3D7_0719200.e9s1_8565	-0.233492629	-0.160228486	0.073264143	0.687095689	0.99984053	FALSE
910	PF3D7_0719400.s1_5695	-0.067929846	-0.043845189	0.024084656	0.893191667	0.99984053	FALSE
911	PF3D7_0719500.1o2_8186	-0.006390193	-0.039406765	-0.033016572	0.800971539	0.99984053	FALSE
912	PF3D7_0719500.2o2_9047	-0.150982307	-0.073000191	0.077982116	0.641096127	0.99984053	FALSE
913	PF3D7_0719600.e2_5954	-0.125426879	-0.051904775	0.073522105	0.631538753	0.99984053	FALSE
914	PF3D7_0719700 (renamed)_9040	-0.093504433	-0.246507588	-0.153003155	0.47814487	0.99984053	FALSE
915	PF3D7_0719700.e3s1_7128	-0.087424183	-0.060045681	0.027378502	0.812431753	0.99984053	FALSE
916	PF3D7_0721000.iso1.exon1.amp1_1958	-0.393200677	-0.259408857	0.133791819	0.664450162	0.99984053	FALSE
917	PF3D7_0721000.iso1.exon1.amp2_2247	-0.162320617	-0.332493201	-0.170172584	0.384874873	0.99984053	FALSE
918	PF3D7_0721100_5690	-0.037213243	-0.184745776	-0.147532533	0.358709648	0.99984053	FALSE
919	PF3D7_0721600.e2s1_4856	-0.163385595	-0.064760116	0.098625479	0.425041472	0.99984053	FALSE
920	PF3D7_0721700_4819	-0.158648891	-0.066518272	0.092130618	0.494570718	0.99984053	FALSE
921	PF3D7_0722600.e1s1_6051	-0.079418074	-0.126937149	-0.047519075	0.680887523	0.99984053	FALSE
922	PF3D7_0722800.1o1_5891	-0.037281458	0.046358055	0.083639513	0.648975826	0.99984053	FALSE
923	PF3D7_0723000.iso1.exon1.amp1_3306	-0.00383846	-0.080881094	-0.077042634	0.796186251	0.99984053	FALSE
924	PF3D7_0723200.e4s1_7754	-0.210339609	-0.081027254	0.129312354	0.582464079	0.99984053	FALSE
925	PF3D7_0723400.e1s2_6637	-0.080180082	-0.219073962	-0.13889388	0.417445136	0.99984053	FALSE
926	PF3D7_0723500_4823	-0.191809135	-0.09143582	0.100373315	0.587903516	0.99984053	FALSE
927	PF3D7_0723700.iso1.exon1.amp2_1934	-0.199135999	-0.000547818	0.198588182	0.211093812	0.99984053	FALSE
928	PF3D7_0723800.iso1.exon1.amp3_2230	-0.147020336	-0.063182857	0.083837479	0.366335658	0.99984053	FALSE
929	PF3D7_0723800.iso1.exon2.amp1_2646	-0.307523458	-0.305891709	0.001631748	0.994998106	0.99984053	FALSE
930	PF3D7_0723900.e1s2_5176	-0.066764792	-0.040054938	0.026709854	0.838301309	0.99984053	FALSE
931	PF3D7_0724300.iso1.exon1.amp1_112	-0.014184559	-0.062024736	-0.047840177	0.51490582	0.99984053	FALSE
932	PF3D7_0724400.iso1.exon1.amp1_2105	-0.128132196	-0.045285868	0.082846328	0.485411974	0.99984053	FALSE
933	PF3D7_0724700.e2s2_8380	-0.273733518	-0.277812291	-0.004078774	0.986576525	0.99984053	FALSE
934	PF3D7_0725100.e1s1_5471	-0.133180734	-0.104533741	0.028646993	0.815766657	0.99984053	FALSE
935	PF3D7_0725200.iso1.exon3.amp1_3844	-0.164307748	-0.074901706	0.089406042	0.38782827	0.99984053	FALSE
936	PF3D7_0726100.2o2_6782	-0.1716464	-0.027908408	0.143737992	0.335574202	0.99984053	FALSE
937	PF3D7_0726200.iso1.exon2.amp1_1023	-0.053861491	-0.072149818	-0.018288326	0.872588216	0.99984053	FALSE
938	PF3D7_0726400.e1s1_6882	-0.063459459	-0.072395229	-0.00893577	0.944573307	0.99984053	FALSE
939	PF3D7_0726400.e1s3_8538	-0.1888763	-0.107779923	0.081096377	0.626782928	0.99984053	FALSE
940	PF3D7_0726400.e2s1_8610	-0.366841166	-0.10487685	0.261964316	0.349164457	0.99984053	FALSE
941	PF3D7_0726400.e2s2_9247	-0.15426815	0.026339443	0.180607593	0.27414942	0.99984053	FALSE
942	PF3D7_0726400.e3s1_8933	-0.098554942	-0.111724971	-0.01317003	0.920100039	0.99984053	FALSE
943	PF3D7_0726400.e6s1_8651	-0.287770681	-0.148864313	0.138906369	0.583196209	0.99984053	FALSE
944	PF3D7_0726400.e6s2_4899	-0.238341713	0.015941905	0.254283618	0.312412972	0.99984053	FALSE
945	PF3D7_0726500.iso1.exon4.amp1_3386	-0.276911348	-0.098708211	0.178203138	0.306449152	0.99984053	FALSE
946	PF3D7_0726500.iso1.exon4.amp2_2525	-0.136883179	0.033509497	0.170392676	0.27589558	0.99984053	FALSE
947	PF3D7_0726600.1o2_6479	-0.180458986	-0.221321143	-0.040862156	0.862951896	0.99984053	FALSE
948	PF3D7_0727000.iso1.exon1.amp1_1996	-0.046163068	-0.071942614	-0.025779546	0.66801312	0.99984053	FALSE
949	PF3D7_0727200.1o1_6756	-0.064513399	-0.061420702	0.003092697	0.97855463	0.99984053	FALSE
950	PF3D7_0727800.iso1.exon1.amp1_4594	-0.205060946	-0.038178004	0.166882942	0.206302875	0.99984053	FALSE
951	PF3D7_0727900.e1s2_5080	-0.161470677	-0.136165358	0.025305319	0.910952083	0.99984053	FALSE
952	PF3D7_0728000.e2_6530	-0.077424577	-0.255922926	-0.17849835	0.243366905	0.99984053	FALSE
953	PF3D7_0728200.2o2_7918	-0.040836147	0.08866337	0.129499517	0.503243547	0.99984053	FALSE
954	PF3D7_0728300.iso1.exon1.amp1_984	-0.131299696	-0.028589003	0.102710693	0.338853131	0.99984053	FALSE
955	PF3D7_0728600.iso1.exon1.amp1_205	-0.049631254	-0.108974985	-0.059343731	0.553182564	0.99984053	FALSE
956	PF3D7_0728600.iso1.exon3.amp1_2396	-0.246141774	0.010019688	0.256161463	0.158698968	0.99984053	FALSE
957	PF3D7_0728700.iso1.exon3.amp1_1258	-0.220289179	-0.113409711	0.106879467	0.572006281	0.99984053	FALSE
958	PF3D7_0728800.iso1.exon1.amp1_4481	-0.023662795	-0.020803783	0.002859012	0.976725516	0.99984053	FALSE
959	PF3D7_0729500.iso1.exon1.amp1_1884	-0.120216874	-0.04683499	0.073381884	0.515306183	0.99984053	FALSE
960	PF3D7_0729700.iso1.exon2.amp1_1872	-0.129573308	-0.121974829	0.007598479	0.944592184	0.99984053	FALSE
961	PF3D7_0729800.iso1.exon1.amp1_365	-0.25525028	-0.155882426	0.099367854	0.605732624	0.99984053	FALSE
962	PF3D7_0729900.e1s1_5072	-0.186580295	-0.030054251	0.156526044	0.406256995	0.99984053	FALSE
963	PF3D7_0730000.iso1.exon1.amp1_348	-0.098016308	-0.075893901	0.022122407	0.77166171	0.99984053	FALSE
964	PF3D7_0730300.e1s1_5186	-0.152752684	-0.226404735	-0.073652051	0.738624216	0.99984053	FALSE
965	PF3D7_0730300.e1s2_5758	-0.211796547	-0.105559523	0.106237024	0.718209423	0.99984053	FALSE
966	PF3D7_0730500.e1s3_7387	-0.093939277	0.000672243	0.094611521	0.218472045	0.99984053	FALSE
967	PF3D7_0730800.1.e2s1_5161	-0.161204668	0.055461789	0.216666458	0.218302744	0.99984053	FALSE
968	PF3D7_0730800.iso2.exon2.amp1_1557	-0.127798639	-0.063703	0.064095639	0.454650027	0.99984053	FALSE
969	PF3D7_0730900.e1s1_8316	-0.180814984	-0.081582998	0.099231986	0.767814444	0.99984053	FALSE
970	PF3D7_0730900.e2s1_8659	-0.240888457	-0.121988556	0.118899901	0.555031886	0.99984053	FALSE
971	PF3D7_0731100.2o2_6789	-0.371147744	-0.068533209	0.302614535	0.31198541	0.99984053	FALSE
972	PF3D7_0731200.2o2_8439	-0.271250773	-0.164290365	0.106960408	0.578266736	0.99984053	FALSE
973	PF3D7_0731500.s1 (renamed)_7684	-0.143442026	0.072792139	0.216234164	0.308543512	0.99984053	FALSE
974	PF3D7_0731500.s2 (renamed)_7112	-0.078223677	-0.03107063	0.047153047	0.639904774	0.99984053	FALSE
975	PF3D7_0731600.e1s1_6357	-0.344793911	-0.039738952	0.305054959	0.117900062	0.99984053	FALSE
976	PF3D7_0732000.iso1.exon2.amp1_690	-0.281340974	-0.226490419	0.054850555	0.810156993	0.99984053	FALSE
977	PF3D7_0732200.iso1.exon2.amp1_1297	-0.200327058	-0.241616166	-0.041289108	0.87651322	0.99984053	FALSE
978	PF3D7_0732300.iso1.exon1.amp1_4175	-0.195570173	-0.249361875	-0.053791702	0.809168806	0.99984053	FALSE
979	PF3D7_0732400.iso1.exon1.amp1_2443	-0.096152173	-0.108377421	-0.012225247	0.921433224	0.99984053	FALSE
980	PF3D7_0732500.iso1.exon1.amp1_135	-0.169259994	-0.040813994	0.128446	0.076461799	0.99984053	FALSE
981	PF3D7_0732700.iso1.exon2.amp1_712	-0.199803552	-0.238383898	-0.038580346	0.88525639	0.99984053	FALSE
982	PF3D7_0732900.iso1.exon2.amp1_996	-0.365262896	-0.185762414	0.179500482	0.57213771	0.99984053	FALSE
983	PF3D7_0733000.iso1.exon1.amp1_3621	-0.088681996	-0.225212945	-0.136530949	0.42681632	0.99984053	FALSE
984	PF3D7_0733000.iso1.exon2.amp3_1942	-0.199035128	-0.137748387	0.061286741	0.592524443	0.99984053	FALSE
985	PF3D7_0800100.iso1.exon1.amp1_723	-0.199351859	-0.225302537	-0.025950679	0.898047996	0.99984053	FALSE
986	PF3D7_0800100.iso1.exon2.amp1_3980	-0.066880321	-0.075251544	-0.008371222	0.912147809	0.99984053	FALSE
987	PF3D7_0800100.iso1.exon2.amp2_4269	0.030864947	-0.032442452	-0.063307399	0.664321589	0.99984053	FALSE
988	PF3D7_0800200.e1s1_8827	-0.097041333	-0.099824333	-0.002782999	0.980307575	0.99984053	FALSE
989	PF3D7_0800200.e1s2_5359	-0.060576684	-0.10451319	-0.043936506	0.683179034	0.99984053	FALSE
990	PF3D7_0800200.e2s1_5745	-0.122159222	0.011444242	0.133603464	0.672488804	0.99984053	FALSE
991	PF3D7_0800300.e1s3_8831	-0.272104192	-0.180023187	0.092081005	0.727046882	0.99984053	FALSE
992	PF3D7_0800300.e2s1_8914	-0.216669524	-0.046696413	0.169973111	0.382494764	0.99984053	FALSE
993	PF3D7_0800400.iso1.exon3.amp1_128	-0.167590139	-0.151394445	0.016195695	0.933014511	0.99984053	FALSE
994	PF3D7_0800500.iso1.exon2.amp1_3888	-0.18393381	-0.241199379	-0.057265569	0.786763622	0.99984053	FALSE
995	PF3D7_0800700.e1s1_6606	-0.152320635	-0.080119272	0.072201362	0.675289795	0.99984053	FALSE
996	PF3D7_0800700.e3s1_5772	-0.194016264	-0.043269159	0.150747105	0.596897116	0.99984053	FALSE
997	PF3D7_0801000.e2s1_5460	-0.305131098	-0.014199774	0.290931324	0.30705818	0.99984053	FALSE
998	PF3D7_0801000.e2s2_6911	-0.070358717	-0.005866664	0.064492053	0.695229721	0.99984053	FALSE
999	PF3D7_0801600.1o1_8124	-0.273916738	-0.171405139	0.1025116	0.73645996	0.99984053	FALSE
1000	PF3D7_0801700.1o3_5645	-0.055724644	-0.04117359	0.014551054	0.925657379	0.99984053	FALSE
1001	PF3D7_0801800_4835	-0.102842643	-0.102126559	0.000716084	0.996160039	0.99984053	FALSE
1002	PF3D7_0801900.iso1.exon1.amp5_1622	-0.097509938	-0.110213873	-0.012703935	0.944000239	0.99984053	FALSE
1003	PF3D7_0802000.e1s1_5197	-0.185049098	-0.212407732	-0.027358634	0.9263793	0.99984053	FALSE
1004	PF3D7_0802000.e1s2_6642	-0.094821976	-0.035725248	0.059096729	0.720240395	0.99984053	FALSE
1005	PF3D7_0802300.iso1.exon1.amp1_1413	-0.111312024	-0.030022136	0.081289887	0.495530155	0.99984053	FALSE
1006	PF3D7_0802300.iso1.exon1.amp2_1927	-0.065019373	-0.059041083	0.00597829	0.969087065	0.99984053	FALSE
1007	PF3D7_0802600.iso1.exon3.amp1_1656	-0.142869127	-0.017333633	0.125535494	0.212608338	0.99984053	FALSE
1008	PF3D7_0802600.iso1.exon6.amp1_2681	-0.085905084	-0.036609903	0.049295181	0.313074429	0.99984053	FALSE
1009	PF3D7_0802800.2o2_8482	-0.187494208	-0.076050726	0.111443482	0.59577059	0.99984053	FALSE
1010	PF3D7_0803200.iso1.exon1.amp1_3327	-0.052543908	-0.07802674	-0.025482832	0.804885566	0.99984053	FALSE
1011	PF3D7_0803400.iso1.exon1.amp1_4581	-0.142922636	-0.282464005	-0.139541369	0.647663733	0.99984053	FALSE
1012	PF3D7_0803400.iso1.exon1.amp2_3948	-0.213473368	-0.248373721	-0.034900353	0.891975017	0.99984053	FALSE
1013	PF3D7_0804000.iso1.exon1.amp1_4456	-0.227678479	-0.138771983	0.088906497	0.640351497	0.99984053	FALSE
1014	PF3D7_0804000.iso1.exon2.amp1_3276	-0.057171628	-0.069408194	-0.012236566	0.922326927	0.99984053	FALSE
1015	PF3D7_0804500.e1s1_5404	-0.217452745	-0.101379352	0.116073394	0.636030603	0.99984053	FALSE
1016	PF3D7_0804500.e2s2_5372	-0.127534531	-0.097293197	0.030241334	0.874564431	0.99984053	FALSE
1017	PF3D7_0804500.e2s3_4800	-0.016370318	-0.02758391	-0.011213592	0.925673805	0.99984053	FALSE
1018	PF3D7_0804500.e3_7398	-0.135585319	-0.14375275	-0.008167431	0.940911644	0.99984053	FALSE
1019	PF3D7_0804600.1o1_6746	-0.249222483	-0.216198223	0.03302426	0.909071853	0.99984053	FALSE
1020	PF3D7_0804800.e1s1_5442	-0.1594049	-0.109841641	0.04956326	0.78579962	0.99984053	FALSE
1021	PF3D7_0804900.1o1_6159	-0.133458168	-0.234484618	-0.10102645	0.58917194	0.99984053	FALSE
1022	PF3D7_0805100.iso1.exon1.amp1_3626	-0.083423374	-0.023591991	0.059831384	0.551916528	0.99984053	FALSE
1023	PF3D7_0805300.iso1.exon1.amp2_1057	-0.015761334	-0.025297953	-0.00953662	0.919715546	0.99984053	FALSE
1024	PF3D7_0805400.1o6_8716	-0.284597457	-0.094847355	0.189750102	0.484707793	0.99984053	FALSE
1025	PF3D7_0805700.iso1.exon1.amp2_3399	-0.132660001	-0.082310286	0.050349715	0.667048371	0.99984053	FALSE
1026	PF3D7_0806000.iso1.exon1.amp2_515	-0.01312995	-0.150256144	-0.137126194	0.609135811	0.99984053	FALSE
1027	PF3D7_0806200.10o10_8244	-0.129674751	-0.176296918	-0.046622167	0.836029587	0.99984053	FALSE
1028	PF3D7_0806300.iso1.exon1.amp1_485	-0.149594404	-0.105468944	0.04412546	0.748717535	0.99984053	FALSE
1029	PF3D7_0806300.iso1.exon2.amp1_3830	-0.0790544	0.000580789	0.079635189	0.34094921	0.99984053	FALSE
1030	PF3D7_0806500.e1s1_5475	-0.02100728	-0.007413839	0.013593442	0.903026116	0.99984053	FALSE
1031	PF3D7_0806600.e2s1_5153	-0.204377651	-0.135087177	0.069290474	0.618967683	0.99984053	FALSE
1032	PF3D7_0806600.e3s1_8038	-0.18820904	-0.130141042	0.058067998	0.726431781	0.99984053	FALSE
1033	PF3D7_0806600.e5s1_5749	-0.067340529	-0.004885273	0.062455255	0.410760966	0.99984053	FALSE
1034	PF3D7_0806700.iso1.exon1.amp1_1804	-0.283507204	-0.156533549	0.126973655	0.669091607	0.99984053	FALSE
1035	PF3D7_0806700.iso1.exon3.amp3_1358	-0.103281288	-0.042428275	0.060853013	0.356580335	0.99984053	FALSE
1036	PF3D7_0806800.e1s1_8932	-0.125206086	-0.057350836	0.06785525	0.73465887	0.99984053	FALSE
1037	PF3D7_0806900.iso1.exon1.amp1_704	-0.174283609	-0.088076167	0.086207442	0.566298909	0.99984053	FALSE
1038	PF3D7_0807100.iso1.exon1.amp2_3363	-0.067770381	-0.083536799	-0.015766418	0.866037274	0.99984053	FALSE
1039	PF3D7_0807700.1o5_5328	-0.105868183	-0.073763249	0.032104934	0.71328892	0.99984053	FALSE
1040	PF3D7_0807700.5o5_5617	-0.019481687	-0.12361293	-0.104131243	0.363874787	0.99984053	FALSE
1041	PF3D7_0807800.e2s1_6602	-0.237878009	-0.238157347	-0.000279337	0.999164125	0.99984053	FALSE
1042	PF3D7_0808100.iso1.exon2.amp1_3829	-0.246434845	-0.088235942	0.158198903	0.416656236	0.99984053	FALSE
1043	PF3D7_0808100.iso1.exon3.amp1_3963	-0.182541609	-0.232573412	-0.050031803	0.84516441	0.99984053	FALSE
1044	PF3D7_0808200.e1s1_9217	-0.191154195	-0.034104579	0.157049616	0.265098056	0.99984053	FALSE
1045	PF3D7_0808400.1o1_4673	-0.161825687	-0.126517975	0.035307712	0.859572756	0.99984053	FALSE
1046	PF3D7_0808600.e1s2_6520	-0.137864764	0.000118803	0.137983566	0.370727368	0.99984053	FALSE
1047	PF3D7_0808600.e2s1_8343	-0.144893337	-0.188854949	-0.043961612	0.851040536	0.99984053	FALSE
1048	PF3D7_0808700.iso1.exon1.amp1_3035	-0.053004357	-0.203416437	-0.15041208	0.511915801	0.99984053	FALSE
1049	PF3D7_0808700.iso1.exon2.amp1_2238	-0.216943072	-0.082276868	0.134666204	0.375980906	0.99984053	FALSE
1050	PF3D7_0808800.iso1.exon1.amp1_3594	-0.115368302	-0.211836572	-0.09646827	0.5271233	0.99984053	FALSE
1051	PF3D7_0808900.iso1.exon1.amp1_4458	-0.12434334	-0.183248862	-0.058905522	0.675127558	0.99984053	FALSE
1052	PF3D7_0809100.iso1.exon1.amp1_4184	-0.091284278	-0.154941254	-0.063656976	0.793292861	0.99984053	FALSE
1053	PF3D7_0809100.iso1.exon2.amp1_1077	-0.205697307	-0.052033147	0.15366416	0.504739063	0.99984053	FALSE
1054	PF3D7_0809100.iso1.exon2.amp2_seg2_2600	0.000568144	-0.037706708	-0.038274852	0.572139924	0.99984053	FALSE
1055	PF3D7_0809200.e1s2_6342	-0.268119705	-0.230632185	0.03748752	0.869995091	0.99984053	FALSE
1056	PF3D7_0809500.iso1.exon1.amp1_3552	-0.071309413	-0.066171646	0.005137767	0.962311417	0.99984053	FALSE
1057	PF3D7_0809600.iso1.exon1.amp4_seg1_2308	-0.206509721	-0.004493268	0.202016454	0.242235265	0.99984053	FALSE
1058	PF3D7_0809900.iso1.exon1.amp1_seg2_287	0.068308478	-0.270677961	-0.338986439	0.270008198	0.99984053	FALSE
1059	PF3D7_0809900.iso1.exon1.amp2_seg2_576	0.053021235	-0.245067616	-0.29808885	0.299611434	0.99984053	FALSE
1060	PF3D7_0810300.2o4_8207	-0.067474588	-0.075333982	-0.007859394	0.944891214	0.99984053	FALSE
1061	PF3D7_0810800.e2s1_9231	-0.127495078	-0.161535019	-0.034039941	0.840194081	0.99984053	FALSE
1062	PF3D7_0810900.1.1o2_7001	-0.165738611	-0.086774431	0.07896418	0.664278526	0.99984053	FALSE
1063	PF3D7_0811600.e2s1_6045	-0.114539732	-0.060874105	0.053665627	0.731661909	0.99984053	FALSE
1064	PF3D7_0811600.e2s2_7207	-0.203997117	-0.151981126	0.052015991	0.769535398	0.99984053	FALSE
1065	PF3D7_0812100.e1s1_5364	-0.126971015	-0.090947782	0.036023233	0.822965811	0.99984053	FALSE
1066	PF3D7_0812400.e1s1_6614	-0.125761271	-0.105934702	0.019826568	0.836735874	0.99984053	FALSE
1067	PF3D7_0812600.iso1.exon2.amp1_4140	-0.236534002	0.008038813	0.244572815	0.077458646	0.99984053	FALSE
1068	PF3D7_0812700.1o1_7561	-0.109998835	-0.070864754	0.039134081	0.732338921	0.99984053	FALSE
1069	PF3D7_0812900.2o2_8824	-0.109097098	-0.089391238	0.01970586	0.816413254	0.99984053	FALSE
1070	PF3D7_0813400.e2s1_6043	-0.320620479	-0.121867128	0.19875335	0.50633945	0.99984053	FALSE
1071	PF3D7_0813700.iso1.exon1.amp2_2781	-0.054580329	-0.122814524	-0.068234194	0.562949972	0.99984053	FALSE
1072	PF3D7_0813900.e2s1_8892	-0.217745147	-0.085702793	0.132042354	0.459642155	0.99984053	FALSE
1073	PF3D7_0814600.e1s1_5462	-0.198447611	-0.167341514	0.031106097	0.880170043	0.99984053	FALSE
1074	PF3D7_0815100.iso1.exon1.amp1_2474	-0.380264834	-0.048051025	0.332213809	0.463473024	0.99984053	FALSE
1075	PF3D7_0815300.iso1.exon1.amp1_4308	-0.177066495	-0.051131397	0.125935098	0.406018357	0.99984053	FALSE
1076	PF3D7_0815300.iso1.exon1.amp2_seg1_2595	-0.06325807	-0.052530139	0.010727931	0.960892937	0.99984053	FALSE
1077	PF3D7_0815400.e1s1_8889	-0.125835099	-0.067618718	0.058216381	0.707203587	0.99984053	FALSE
1078	PF3D7_0815500.3o5_7032	-0.200633003	-0.160838701	0.039794302	0.869662403	0.99984053	FALSE
1079	PF3D7_0816100.1o4_7264	-0.210330559	-0.18062061	0.029709949	0.921461142	0.99984053	FALSE
1080	PF3D7_0816200.1o1_6682	-0.071291199	-0.225347526	-0.154056328	0.316667635	0.99984053	FALSE
1081	PF3D7_0816500.e2s1_4845	-0.110545362	-0.021855744	0.088689618	0.48243118	0.99984053	FALSE
1082	PF3D7_0816600.e1s1_6325	-0.134022424	-0.032933562	0.101088861	0.30327356	0.99984053	FALSE
1083	PF3D7_0816700.iso1.exon3.amp1_4095	-0.223265547	-0.219123084	0.004142463	0.986116361	0.99984053	FALSE
1084	PF3D7_0817300.e1s3_7500	-0.344770215	-0.002809036	0.341961179	0.275903169	0.99984053	FALSE
1085	PF3D7_0817700.iso1.exon14.amp1_1790	-0.366110603	-0.167408373	0.19870223	0.521444872	0.99984053	FALSE
1086	PF3D7_0817700.iso1.exon15.amp1_2691	-0.1056422	-0.102728343	0.002913857	0.975770745	0.99984053	FALSE
1087	PF3D7_0818500.e2_5381	-0.125749627	-0.123871391	0.001878235	0.990821441	0.99984053	FALSE
1088	PF3D7_0818900_4784	-0.213837848	-0.082858938	0.13097891	0.590573254	0.99984053	FALSE
1089	PF3D7_0819600.2o2_6409	-0.122111975	-0.13841839	-0.016306414	0.928290245	0.99984053	FALSE
1090	PF3D7_0819800.e4s1_8607	-0.317218929	-0.130735899	0.18648303	0.472363412	0.99984053	FALSE
1091	PF3D7_0820600.3o3_6147	-0.153064146	-0.111460712	0.041603434	0.789153679	0.99984053	FALSE
1092	PF3D7_0821000.1o5_7907	-0.172756414	-0.059854092	0.112902323	0.599514544	0.99984053	FALSE
1093	PF3D7_0821300.iso1.exon1.amp1_3317	-0.132889394	-0.104786917	0.028102477	0.708642728	0.99984053	FALSE
1094	PF3D7_0821300.iso1.exon3.amp1_3898	-0.228556501	-0.072414397	0.156142104	0.4306376	0.99984053	FALSE
1095	PF3D7_0821500.1o1_8442	-0.407297709	-0.199418463	0.207879245	0.55272225	0.99984053	FALSE
1096	PF3D7_0821600.1o1_4738	-0.086746898	-0.106951222	-0.020204324	0.872996702	0.99984053	FALSE
1097	PF3D7_0822600.e2s1_7209	-0.216762795	-0.19868229	0.018080505	0.938269521	0.99984053	FALSE
1098	PF3D7_0823300 (renamed, has duplicates)_6432	-0.09388246	0.077396411	0.171278871	0.325310409	0.99984053	FALSE
1099	PF3D7_0823300.e1s1_7488	-0.205428872	-0.303955696	-0.098526824	0.706525232	0.99984053	FALSE
1100	PF3D7_0823300.e1s2_7199	-0.283829678	-0.20423849	0.079591188	0.748670897	0.99984053	FALSE
1101	PF3D7_0823500.1o1_5877	0.070304604	-0.061421825	-0.131726428	0.302717715	0.99984053	FALSE
1102	PF3D7_0823800_6524	-0.092857912	-0.094814087	-0.001956174	0.977813238	0.99984053	FALSE
1103	PF3D7_0823900.1o1_8440	-0.236394034	-0.225684312	0.010709722	0.972044179	0.99984053	FALSE
1104	PF3D7_0824200.iso1.exon2.amp1_seg1_3174	-0.146433425	-0.052655591	0.093777833	0.438360385	0.99984053	FALSE
1105	PF3D7_0824200.iso1.exon2.amp2_seg1_3463	-0.199664001	-0.154025831	0.045638171	0.796549681	0.99984053	FALSE
1106	PF3D7_0824600.1o5_8431	-0.098180887	-0.07532974	0.022851147	0.897721003	0.99984053	FALSE
1107	PF3D7_0824700.iso1.exon16.amp1_3245	-0.367821939	-0.269092496	0.098729443	0.763356006	0.99984053	FALSE
1108	PF3D7_0825200.iso1.exon1.amp1_2065	-0.108816056	-0.090768366	0.018047691	0.826466699	0.99984053	FALSE
1109	PF3D7_0825200.iso1.exon4.amp1_4086	-0.140032826	-0.040234443	0.099798384	0.545368873	0.99984053	FALSE
1110	PF3D7_0825600.iso1.exon1.amp1_3549	-0.026131156	-0.006714399	0.019416757	0.764094413	0.99984053	FALSE
1111	PF3D7_0825800.iso1.exon1.amp1_1307	-0.189558854	0.011649754	0.201208607	0.319996649	0.99984053	FALSE
1112	PF3D7_0826000.iso1.exon1.amp2_3371	-0.151536367	-0.010878182	0.140658184	0.247261294	0.99984053	FALSE
1113	PF3D7_0826100.s1_5414	-0.141428924	-0.179197541	-0.037768617	0.870095493	0.99984053	FALSE
1114	PF3D7_0826100.s2_5703	-0.158666801	-0.345490177	-0.186823376	0.477587281	0.99984053	FALSE
1115	PF3D7_0826100.s3_8299	-0.163294843	-0.206205555	-0.042910713	0.867877319	0.99984053	FALSE
1116	PF3D7_0826100.s4_8588	-0.063044428	-0.106831841	-0.043787413	0.712086675	0.99984053	FALSE
1117	PF3D7_0826100.s8_8594	-0.188693668	-0.250371849	-0.061678181	0.786348722	0.99984053	FALSE
1118	PF3D7_0826300.1o1_6730	-0.241581209	-0.170506995	0.071074214	0.704970713	0.99984053	FALSE
1119	PF3D7_0826400.iso1.exon6.amp1_665	-0.169292518	-0.109563486	0.059729031	0.533403645	0.99984053	FALSE
1120	PF3D7_0826500.e1s1_5469	-0.181401206	-0.088741643	0.092659563	0.662860038	0.99984053	FALSE
1121	PF3D7_0826500.e1s2_5180	-0.2010903	-0.060378086	0.140712214	0.695758339	0.99984053	FALSE
1122	PF3D7_0826700.e2_6241	-0.296415838	-0.127558123	0.168857715	0.616592446	0.99984053	FALSE
1123	PF3D7_0827100.s2_5089	-0.137914179	-0.008081862	0.129832317	0.527983124	0.99984053	FALSE
1124	PF3D7_0827600.2o2_6223	-0.172752366	-0.222898163	-0.050145797	0.811090106	0.99984053	FALSE
1125	PF3D7_0827800.e1s1_6935	0.037654193	-0.032339999	-0.069994192	0.439195636	0.99984053	FALSE
1126	PF3D7_0827800.e1s3_6929	-0.295017789	-0.138488605	0.156529184	0.53131902	0.99984053	FALSE
1127	PF3D7_0827900.e2_7119	-0.128737814	-0.128571794	0.00016602	0.998801852	0.99984053	FALSE
1128	PF3D7_0828100.iso1.exon3.amp1_1012	-0.190947937	0.009308702	0.200256639	0.356454819	0.99984053	FALSE
1129	PF3D7_0828200.iso1.exon1.amp2_1624	-0.013200793	-0.037488793	-0.024288001	0.706860478	0.99984053	FALSE
1130	PF3D7_0828400.1o1_8192	-0.146739444	-0.104841574	0.04189787	0.805773161	0.99984053	FALSE
1131	PF3D7_0828500.4o4_8157	-0.229216667	-0.185476766	0.0437399	0.864593448	0.99984053	FALSE
1132	PF3D7_0829000.e2s1_7406	0.017958874	-0.161886446	-0.17984532	0.619006067	0.99984053	FALSE
1133	PF3D7_0829600.1o1_8708	-0.165310009	-0.04075474	0.124555269	0.516785856	0.99984053	FALSE
1134	PF3D7_0830600.2o2_6153	-0.025255629	-0.15678331	-0.131527681	0.2912668	0.99984053	FALSE
1135	PF3D7_0830800.iso1.exon1.amp1_1373	-0.124097608	0.004848608	0.128946215	0.378290035	0.99984053	FALSE
1136	PF3D7_0830800.iso1.exon1.amp2_4505	-0.175237558	-0.084811546	0.090426013	0.470233104	0.99984053	FALSE
1137	PF3D7_0830800.iso1.exon2.amp1_1892	-0.084296009	-0.057947373	0.026348636	0.726402044	0.99984053	FALSE
1138	PF3D7_0831100.iso1.exon1.amp2_3348	-0.04923797	-0.07693809	-0.02770012	0.795735044	0.99984053	FALSE
1139	PF3D7_0831100.iso1.exon2.amp1_4116	-0.090958596	0.00294223	0.093900825	0.605903279	0.99984053	FALSE
1140	PF3D7_0831200.iso1.exon1.amp1_2190	-0.1764187	-0.198459545	-0.022040845	0.890362577	0.99984053	FALSE
1141	PF3D7_0831300.2o2_7356	-0.369671362	0.093762892	0.463434254	0.10375942	0.99984053	FALSE
1142	PF3D7_0831400.2o2_8450	-0.449898941	0.041573479	0.491472421	0.139522952	0.99984053	FALSE
1143	PF3D7_0831500.iso1.exon2.amp1_2951	-0.21448428	-0.03469481	0.179789471	0.41433544	0.99984053	FALSE
1144	PF3D7_0831500.iso1.exon3.amp1_1846	-0.088863523	-0.065083585	0.023779939	0.834238393	0.99984053	FALSE
1145	PF3D7_0831700.2o2_5026	-0.198720728	-0.022476533	0.176244195	0.403628839	0.99984053	FALSE
1146	PF3D7_0831800.2o2_5849	-0.066607676	0.014615334	0.081223009	0.587950039	0.99984053	FALSE
1147	PF3D7_0832000.iso1.exon3.amp1_1848	-0.203742644	-0.172715241	0.031027403	0.837373578	0.99984053	FALSE
1148	PF3D7_0832300.2o2_7858	0.03535421	-0.070732832	-0.106087041	0.410544387	0.99984053	FALSE
1149	PF3D7_0832400.iso1.exon3.amp1_1853	-0.258690262	-0.264458804	-0.005768543	0.979332665	0.99984053	FALSE
1150	PF3D7_0832800.iso1.exon3.amp1_1854	-0.242698978	-0.26955935	-0.026860372	0.90712329	0.99984053	FALSE
1151	PF3D7_0832900.iso1.exon3.amp1_986	-0.261753002	-0.309596101	-0.047843099	0.872763597	0.99984053	FALSE
1152	PF3D7_0833000.iso1.exon3.amp1_3881	-0.281326665	-0.322433173	-0.041106507	0.896774337	0.99984053	FALSE
1153	PF3D7_0833100.iso1.exon3.amp1_4170	-0.357886182	-0.36239203	-0.004505848	0.988471917	0.99984053	FALSE
1154	PF3D7_0833200.iso1.exon3.amp1_3030	-0.093165439	-0.172577986	-0.079412548	0.684790889	0.99984053	FALSE
1155	PF3D7_0833300.iso1.exon1.amp1_1870	-0.302694312	-0.043885862	0.25880845	0.386561324	0.99984053	FALSE
1156	PF3D7_0833400.iso1.exon3.amp1_4185	-0.136802205	-0.100607464	0.036194741	0.824910135	0.99984053	FALSE
1157	PF3D7_0833500.iso1.exon3.amp1_3614	-0.205347339	-0.207753986	-0.002406646	0.989755156	0.99984053	FALSE
1158	PF3D7_0900100.iso1.exon2.amp1_151	-0.115894085	-0.253644238	-0.137750153	0.473722909	0.99984053	FALSE
1159	PF3D7_0900200.e2s1_8924	-0.192946581	-0.298953827	-0.106007246	0.642581222	0.99984053	FALSE
1160	PF3D7_0900300.iso1.exon1.amp1_1001	-0.216988668	-0.171248179	0.045740489	0.826799522	0.99984053	FALSE
1161	PF3D7_0900400.iso1.exon2.amp1_1867	-0.194709238	-0.087701456	0.107007782	0.484324097	0.99984053	FALSE
1162	PF3D7_0900500.iso1.exon1.amp1_4464	-0.181464682	-0.244248678	-0.062783995	0.707622379	0.99984053	FALSE
1163	PF3D7_0900600.iso1.exon1.amp1_424	-0.285515721	-0.243720366	0.041795356	0.877266048	0.99984053	FALSE
1164	PF3D7_0900700.iso1.exon1.amp1_2726	-0.10146611	-0.224938986	-0.123472876	0.520185539	0.99984053	FALSE
1165	PF3D7_0900900.iso1.exon1.amp1_4454	-0.221801442	-0.307169912	-0.085368471	0.715235057	0.99984053	FALSE
1166	PF3D7_0901000.iso1.exon1.amp1_3010	0.041337039	-0.179582037	-0.220919077	0.168048372	0.99984053	FALSE
1167	PF3D7_0901100.iso1.exon1.amp1_3608	-0.154419913	-0.151755385	0.002664529	0.983588532	0.99984053	FALSE
1168	PF3D7_0901300.iso1.exon2.amp1_1859	-0.28314187	-0.180999607	0.102142263	0.675664395	0.99984053	FALSE
1169	PF3D7_0901400.iso1.exon2.amp1_711	-0.194085428	-0.123958163	0.070127265	0.707627841	0.99984053	FALSE
1170	PF3D7_0901500.iso1.exon2.amp1_4476	-0.246919858	-0.287764422	-0.040844565	0.863584398	0.99984053	FALSE
1171	PF3D7_0901600.iso1.exon2.amp1_1269	-0.367397721	-0.340124927	0.027272794	0.925849162	0.99984053	FALSE
1172	PF3D7_0901800.2o2_8725	-0.128400415	0.020641628	0.149042043	0.442996564	0.99984053	FALSE
1173	PF3D7_0902200.2o3_7910	-0.165866563	-0.250356282	-0.084489719	0.737235102	0.99984053	FALSE
1174	PF3D7_0902300.2o3_7037	-0.05932713	-0.044295455	0.015031675	0.847415694	0.99984053	FALSE
1175	PF3D7_0902400.iso1.exon2.amp1_1014	-0.146404788	-0.067907299	0.07849749	0.409984675	0.99984053	FALSE
1176	PF3D7_0902600.2o3_8194	-0.074684967	-0.029769509	0.044915457	0.675609461	0.99984053	FALSE
1177	PF3D7_0902800.2o4_7652	-0.142237073	0.000973157	0.14321023	0.417232248	0.99984053	FALSE
1178	PF3D7_0902800.4o4_7941	-0.151374292	-0.087207269	0.064167022	0.753354278	0.99984053	FALSE
1179	PF3D7_0902900.1o1_8123	-0.199027788	-0.106096458	0.092931331	0.739337403	0.99984053	FALSE
1180	PF3D7_0903000.1o1_9002	-0.0568958	-0.044610342	0.012285458	0.915590538	0.99984053	FALSE
1181	PF3D7_0903000_5973	-0.069063567	-0.0228485	0.046215067	0.638050885	0.99984053	FALSE
1182	PF3D7_0903300.iso1.exon1.amp3_3123	-0.037535486	0.007735823	0.045271309	0.645356152	0.99984053	FALSE
1183	PF3D7_0903300.iso1.exon1.amp4_1038	-0.046103941	0.059854414	0.105958355	0.553954124	0.99984053	FALSE
1184	PF3D7_0903400.e1s3_8886	-0.187011881	-0.096616932	0.09039495	0.598875299	0.99984053	FALSE
1185	PF3D7_0903500.e1s1_7220	-0.181525995	-0.261515671	-0.079989676	0.81393884	0.99984053	FALSE
1186	PF3D7_0903500.e1s2_7214	-0.17108748	0.038370975	0.209458455	0.180360053	0.99984053	FALSE
1187	PF3D7_0903700.e3s1_4884	-0.207942449	-0.166012397	0.041930052	0.861613561	0.99984053	FALSE
1188	PF3D7_0903800.iso1.exon2.amp1_1662	-0.117458017	-0.140420505	-0.022962487	0.890922515	0.99984053	FALSE
1189	PF3D7_0903800.iso1.exon2.amp2_3644	-0.204171198	-0.141460816	0.062710381	0.838479126	0.99984053	FALSE
1190	PF3D7_0904900.e1s1_8018	-0.015519192	-0.052427911	-0.036908719	0.616837973	0.99984053	FALSE
1191	PF3D7_0904900.e1s3_6567	-0.090123003	-0.092668354	-0.002545351	0.982300133	0.99984053	FALSE
1192	PF3D7_0905100.iso1.exon2.amp1_4406	-0.160627907	-0.081280374	0.079347533	0.76165492	0.99984053	FALSE
1193	PF3D7_0905100.iso1.exon3.amp1_1647	-0.055074185	-0.178031038	-0.122956852	0.543445224	0.99984053	FALSE
1194	PF3D7_0905300.s5_9157	-0.18746784	-0.020496613	0.166971227	0.396666522	0.99984053	FALSE
1195	PF3D7_0905300.s6_8296	-0.202955529	-0.03121911	0.171736419	0.528758051	0.99984053	FALSE
1196	PF3D7_0905300.s7_8001	-0.226042682	-0.132265536	0.093777147	0.564636882	0.99984053	FALSE
1197	PF3D7_0905400.e7s1_7466	-0.163126644	-0.042680203	0.120446441	0.532053947	0.99984053	FALSE
1198	PF3D7_0905600.2o2_5648	-0.062681052	-0.108496181	-0.045815129	0.693510288	0.99984053	FALSE
1199	PF3D7_0905900.iso1.exon1.amp1_3487	-0.055384571	-0.052167312	0.003217259	0.977127481	0.99984053	FALSE
1200	PF3D7_0905900.iso1.exon1.amp2_seg1_1439	-0.115651558	-0.059595506	0.056056052	0.604647085	0.99984053	FALSE
1201	PF3D7_0906200.1o1_7631	-0.28491318	-0.181055986	0.103857194	0.751596701	0.99984053	FALSE
1202	PF3D7_0906300.1o1_4700	-0.105111275	-0.047644212	0.057467063	0.715914389	0.99984053	FALSE
1203	PF3D7_0906400.e1s1_9120	-0.064752609	-0.209633109	-0.1448805	0.317368147	0.99984053	FALSE
1204	PF3D7_0906500.1o1_4999	-0.192195698	-0.301217082	-0.109021385	0.666888943	0.99984053	FALSE
1205	PF3D7_0906900.1o2_5563	-0.145413912	-0.046875905	0.098538007	0.608297036	0.99984053	FALSE
1206	PF3D7_0907200.e1s2_8934	-0.082471608	-0.170195989	-0.087724381	0.451737741	0.99984053	FALSE
1207	PF3D7_0907600.iso1.exon2.amp1_4206	-0.071677486	-0.072516727	-0.000839242	0.997004709	0.99984053	FALSE
1208	PF3D7_0907700.e1s1_8630	-0.19375367	-0.089521528	0.104232142	0.407067268	0.99984053	FALSE
1209	PF3D7_0908200.iso1.exon2.amp1_4259	-0.122689147	-0.022047854	0.100641293	0.211662497	0.99984053	FALSE
1210	PF3D7_0908300.iso2.exon2.amp1_3507	-0.136213894	-0.007885567	0.128328328	0.484188441	0.99984053	FALSE
1211	PF3D7_0908400.2o2_5815	-0.208828872	-0.054874165	0.153954707	0.4978692	0.99984053	FALSE
1212	PF3D7_0908500.e15s1_7738	-0.154095164	-0.069441914	0.08465325	0.744103568	0.99984053	FALSE
1213	PF3D7_0908500.e17s1_8622	-0.025983725	-0.116358625	-0.0903749	0.568443834	0.99984053	FALSE
1214	PF3D7_0908500.e4s1_8616	-0.169559312	-0.157177466	0.012381845	0.923582428	0.99984053	FALSE
1215	PF3D7_0908700.iso1.exon6.amp1_4386	-0.090034749	-0.031004873	0.059029875	0.339589581	0.99984053	FALSE
1216	PF3D7_0909100.1o1_4745	-0.039242527	-0.052198248	-0.012955721	0.855947087	0.99984053	FALSE
1217	PF3D7_0909500_5686	-0.178191564	0.045155817	0.223347381	0.324358107	0.99984053	FALSE
1218	PF3D7_0909600.3o3_8193	-0.074887376	-0.148495474	-0.073608098	0.751907288	0.99984053	FALSE
1219	PF3D7_0909700.iso1.exon1.amp1_1703	-0.156306862	-0.208180365	-0.051873503	0.860313469	0.99984053	FALSE
1220	PF3D7_0909900.iso1.exon1.amp1_1689	-0.285224597	-0.114137887	0.17108671	0.396343617	0.99984053	FALSE
1221	PF3D7_0909900.iso1.exon1.amp2_2197	-0.147398735	-0.081069131	0.066329604	0.637439513	0.99984053	FALSE
1222	PF3D7_0910000.iso1.exon1.amp2_1355	-0.060298659	-0.063000553	-0.002701894	0.966407402	0.99984053	FALSE
1223	PF3D7_0910200.iso1.exon1.amp1_1395	0.024299304	-0.118468535	-0.142767839	0.265882241	0.99984053	FALSE
1224	PF3D7_0910400.iso1.exon1.amp2_seg1_2878	-0.150472217	-0.029929222	0.120542995	0.522297021	0.99984053	FALSE
1225	PF3D7_0910400.iso1.exon1.amp2_seg2_864	-0.102584368	-0.090443925	0.012140443	0.861290823	0.99984053	FALSE
1226	PF3D7_0910900.iso1.exon2.amp1_3342	-0.191198798	0.123252508	0.314451307	0.061503679	0.99984053	FALSE
1227	PF3D7_0911100.e1s1_9127	-0.057393249	-0.174343284	-0.116950035	0.530874876	0.99984053	FALSE
1228	PF3D7_0911300.e1s2_8013	-0.286733869	-0.245907524	0.040826346	0.901490205	0.99984053	FALSE
1229	PF3D7_0911900.2o2_4716	-0.213004302	-0.159967664	0.053036638	0.750240048	0.99984053	FALSE
1230	PF3D7_0911900.e2_7125	-0.151845507	-0.239546352	-0.087700845	0.513896662	0.99984053	FALSE
1231	PF3D7_0912500.2o7_6421	-0.064851633	0.01042503	0.075276663	0.660060206	0.99984053	FALSE
1232	PF3D7_0912600.iso1.exon1.amp1_741	-0.070848	-0.086124314	-0.015276314	0.90589443	0.99984053	FALSE
1233	PF3D7_0912600.iso1.exon2.amp1_4466	-0.202349914	-0.020395997	0.181953917	0.226222297	0.99984053	FALSE
1234	PF3D7_0912800.1o1_8778	-0.103726466	-0.153663513	-0.049937047	0.805727839	0.99984053	FALSE
1235	PF3D7_0912900.e2s1_6018	-0.120968363	-0.104822753	0.01614561	0.906175667	0.99984053	FALSE
1236	PF3D7_0913500.3o3_7012	-0.076005658	-0.116408816	-0.040403158	0.69607908	0.99984053	FALSE
1237	PF3D7_0914000.1o1_7665	-0.171571406	-0.108185649	0.063385757	0.777241239	0.99984053	FALSE
1238	PF3D7_0914100.iso1.exon1.amp1_2279	-0.130001775	-0.123650771	0.006351003	0.943398329	0.99984053	FALSE
1239	PF3D7_0914200.3o4_7023	-0.064672839	-0.073369531	-0.008696692	0.96244334	0.99984053	FALSE
1240	PF3D7_0914800.1o1_6098	-0.248965128	-0.13701314	0.111951988	0.678577684	0.99984053	FALSE
1241	PF3D7_0915300.iso1.exon1.amp1_149	-0.042717052	-0.066586993	-0.023869941	0.839794888	0.99984053	FALSE
1242	PF3D7_0915400.e1s1_6348	-0.227728155	-0.191039183	0.036688972	0.856075711	0.99984053	FALSE
1243	PF3D7_0916200.iso1.exon1.amp1_2352	-0.229463537	-0.068773316	0.160690221	0.369563762	0.99984053	FALSE
1244	PF3D7_0916200.iso1.exon2.amp1_2241	-0.135881618	-0.134121789	0.001759829	0.984439377	0.99984053	FALSE
1245	PF3D7_0916200.iso1.exon2.amp2_1904	-0.086227702	-0.037187289	0.049040412	0.63203157	0.99984053	FALSE
1246	PF3D7_0916700.e1s1_6618	-0.197959967	-0.138475453	0.059484514	0.776355996	0.99984053	FALSE
1247	PF3D7_0916800.iso1.exon1.amp1_3204	-0.276075775	-0.122265422	0.153810353	0.527605904	0.99984053	FALSE
1248	PF3D7_0917000.iso1.exon1.amp2_1923	-0.068640673	-0.23925547	-0.170614797	0.394956399	0.99984053	FALSE
1249	PF3D7_0917200.2o2_4677	-0.247829352	-0.085647245	0.162182107	0.51099784	0.99984053	FALSE
1250	PF3D7_0917300.1o1_6428	-0.182168577	-0.017696441	0.164472137	0.531124782	0.99984053	FALSE
1251	PF3D7_0917500.e1s1_7508	-0.097641615	-0.070177576	0.027464039	0.814105124	0.99984053	FALSE
1252	PF3D7_0917900.e2_8279	-0.143896192	-0.101375523	0.042520669	0.817768769	0.99984053	FALSE
1253	PF3D7_0918000.e1s1_8347	-0.259304921	-0.179264697	0.080040224	0.744698921	0.99984053	FALSE
1254	PF3D7_0918300.e2s1_6599	0.014860323	-0.360434988	-0.37529531	0.073087965	0.99984053	FALSE
1255	PF3D7_0918900.e1s1_7198	-0.167686469	-0.037274342	0.130412127	0.424050085	0.99984053	FALSE
1256	PF3D7_0918900.e1s2_7481	-0.300984617	-0.123868331	0.177116286	0.454483982	0.99984053	FALSE
1257	PF3D7_0919200.iso1.exon1.amp1_389	-0.127781596	-0.105211686	0.02256991	0.833190229	0.99984053	FALSE
1258	PF3D7_0919400.e1s1_4873	-0.172469037	-0.091520115	0.080948922	0.662801061	0.99984053	FALSE
1259	PF3D7_0919800.iso1.exon1.amp1_3111	-0.146072635	-0.11432176	0.031750875	0.87970753	0.99984053	FALSE
1260	PF3D7_0919800.iso1.exon1.amp2_seg1_1133	-0.139370555	-0.165110994	-0.025740439	0.915515884	0.99984053	FALSE
1261	PF3D7_0919900.iso1.exon1.amp1_1105	-0.118487629	-0.14068926	-0.022201631	0.900581075	0.99984053	FALSE
1262	PF3D7_0919900.iso1.exon1.amp4_1035	-0.104885329	-0.008103941	0.096781388	0.250066411	0.99984053	FALSE
1263	PF3D7_0920300.1o4_5819	-0.058040319	-0.185924545	-0.127884226	0.507403528	0.99984053	FALSE
1264	PF3D7_0920400.s1_5698	-0.171447945	-0.03943677	0.132011175	0.567225416	0.99984053	FALSE
1265	PF3D7_0920800.e1s1_4875	-0.116108511	-0.12512608	-0.009017569	0.947331227	0.99984053	FALSE
1266	PF3D7_0920900.iso1.exon2.amp1_3864	-0.192878825	-0.201740344	-0.008861519	0.957149685	0.99984053	FALSE
1267	PF3D7_0921200.2o6_8242	-0.124600392	-0.084363789	0.040236603	0.780401219	0.99984053	FALSE
1268	PF3D7_0921400.e1_5664	-0.23510727	-0.102080664	0.133026606	0.655946027	0.99984053	FALSE
1269	PF3D7_0921800.1o3_8466	0.047375654	-0.05585365	-0.103229304	0.274820523	0.99984053	FALSE
1270	PF3D7_0922100.e1s2_8955	-0.188837431	-0.126004537	0.062832895	0.823862784	0.99984053	FALSE
1271	PF3D7_0922200.e1s1_7191	-0.145509465	-0.14077214	0.004737325	0.977388243	0.99984053	FALSE
1272	PF3D7_0922500_7709	0.310213884	-0.023704711	-0.333918595	0.486291205	0.99984053	FALSE
1273	PF3D7_0922800.iso1.exon4.amp3_229	-0.152709096	-0.145788907	0.006920189	0.982163457	0.99984053	FALSE
1274	PF3D7_0923800.1.e1s1_7487	-0.27949016	0.013344319	0.292834479	0.178120944	0.99984053	FALSE
1275	PF3D7_0923800.iso2.exon1.amp1_446	-0.282280538	-0.114563751	0.167716787	0.399024238	0.99984053	FALSE
1276	PF3D7_0924000.iso1.exon1.amp1_3692	-0.226132837	0.121106171	0.347239008	0.047746124	0.99984053	FALSE
1277	PF3D7_0924000.iso1.exon1.amp2_3981	-0.310028768	-0.057835935	0.252192833	0.385846762	0.99984053	FALSE
1278	PF3D7_0924000.iso1.exon2.amp1_2373	-0.276352694	-0.126120246	0.150232448	0.54337806	0.99984053	FALSE
1279	PF3D7_0924200.iso1.exon1.amp1_2570	0.01573203	-0.106722336	-0.122454366	0.373495856	0.99984053	FALSE
1280	PF3D7_0924600.iso1.exon1.amp1_2177	-0.157818533	-0.238777281	-0.080958748	0.602094381	0.99984053	FALSE
1281	PF3D7_0924600.iso1.exon2.amp2_seg1_2289	-0.026466546	-0.05000055	-0.023534004	0.815032827	0.99984053	FALSE
1282	PF3D7_0925300.1o1_6180	-0.22136725	-0.087780216	0.133587034	0.528637714	0.99984053	FALSE
1283	PF3D7_0925800.e1s1_9121	-0.196362224	-0.087472006	0.108890218	0.496184071	0.99984053	FALSE
1284	PF3D7_0925900.e2s1_8042	-0.229719308	-0.1710597	0.058659608	0.786211786	0.99984053	FALSE
1285	PF3D7_0926200.iso1.exon1.amp1_3505	-0.161961924	-0.08523119	0.076730733	0.646635152	0.99984053	FALSE
1286	PF3D7_0926500.iso1.exon1.amp2_2495	-0.049161825	-0.048698423	0.000463402	0.995653724	0.99984053	FALSE
1287	PF3D7_0927300.e1s1_7797	-0.045668993	-0.068428208	-0.022759215	0.889452514	0.99984053	FALSE
1288	PF3D7_0927700.1o1_7283	-0.281464157	-0.125687728	0.155776429	0.568050651	0.99984053	FALSE
1289	PF3D7_0927800.2o2_4680	-0.008627496	-0.077424693	-0.068797197	0.669576301	0.99984053	FALSE
1290	PF3D7_0927900.1o1_4984	-0.178856033	-0.096186472	0.082669561	0.735537126	0.99984053	FALSE
1291	PF3D7_0928600.1o1_6100	-0.115361776	-0.111074905	0.004286872	0.986091389	0.99984053	FALSE
1292	PF3D7_0928700.iso1.exon1.amp1_3151	-0.11329375	0.039376573	0.152670324	0.08219368	0.99984053	FALSE
1293	PF3D7_0929000.2o2_8472	-0.255997715	-0.096350258	0.159647457	0.460323545	0.99984053	FALSE
1294	PF3D7_0929000.e2_5102	-0.282886258	-0.155749477	0.127136781	0.588522078	0.99984053	FALSE
1295	PF3D7_0929600.2o2_4963	-0.072833865	-0.062487623	0.010346242	0.938262569	0.99984053	FALSE
1296	PF3D7_0929800.iso1.exon1.amp1_4123	-0.232471191	-0.113843909	0.118627282	0.476290757	0.99984053	FALSE
1297	PF3D7_0929900.iso1.exon1.amp1_1496	-0.06417625	-0.050937032	0.013239218	0.884418667	0.99984053	FALSE
1298	PF3D7_0930100.iso1.exon1.amp2_192	-0.024570905	-0.057840365	-0.03326946	0.521285459	0.99984053	FALSE
1299	PF3D7_0930200.iso1.exon4.amp1_2997	-0.202634301	-0.043749915	0.158884385	0.259794484	0.99984053	FALSE
1300	PF3D7_0930300.s1_9167	-0.141868333	-0.064781952	0.077086381	0.704940972	0.99984053	FALSE
1301	PF3D7_0930300.s2_8884	-0.164392472	0.007480623	0.171873095	0.379245042	0.99984053	FALSE
1302	PF3D7_0930600.iso1.exon5.amp1_2100	-0.0980993	-0.111696464	-0.013597164	0.874301532	0.99984053	FALSE
1303	PF3D7_0930700.iso1.exon1.amp1_702	-0.080780109	-0.091511758	-0.010731649	0.903964385	0.99984053	FALSE
1304	PF3D7_0930700.iso1.exon2.amp1_2944	-0.202925868	-0.095610858	0.10731501	0.599561091	0.99984053	FALSE
1305	PF3D7_0931300.1o1_6427	-0.100062265	0.029479091	0.129541356	0.35428805	0.99984053	FALSE
1306	PF3D7_0931300_6263	-0.161569132	-0.039057993	0.122511139	0.3588535	0.99984053	FALSE
1307	PF3D7_0931400.3o4_4980	-0.157741961	0.035717762	0.193459724	0.330958479	0.99984053	FALSE
1308	PF3D7_0931600.iso1.exon2.amp1_2996	-0.129008252	0.028308972	0.157317224	0.331666793	0.99984053	FALSE
1309	PF3D7_0931700.2o3_7353	-0.109559795	0.004165257	0.113725052	0.270385259	0.99984053	FALSE
1310	PF3D7_0931800.e1s1_7757	-0.242808445	-0.127668552	0.115139893	0.584508952	0.99984053	FALSE
1311	PF3D7_0932100.2o5_9117	-0.087639317	-0.234905013	-0.147265696	0.345537408	0.99984053	FALSE
1312	PF3D7_0932300.e1s1_4887	0.01584009	-0.014138836	-0.029978926	0.895170209	0.99984053	FALSE
1313	PF3D7_0932700.iso1.exon1.amp2_4526	-0.017201913	-0.072791393	-0.05558948	0.723218979	0.99984053	FALSE
1314	PF3D7_0933100.4o4_8227	-0.040376009	-0.080369689	-0.03999368	0.630173456	0.99984053	FALSE
1315	PF3D7_0933500.s1_5707	-0.077056656	-0.077270267	-0.000213612	0.998471069	0.99984053	FALSE
1316	PF3D7_0933600.e1s1_8054	-0.0637658	-0.056256145	0.007509654	0.932694994	0.99984053	FALSE
1317	PF3D7_0933900.4o4_5828	-0.185809062	-0.141924429	0.043884633	0.762673102	0.99984053	FALSE
1318	PF3D7_0934300.1o1_7830	-0.131689693	-0.133010962	-0.001321268	0.992612853	0.99984053	FALSE
1319	PF3D7_0935600.1o2_7901	-0.281886913	-0.14943478	0.132452133	0.705098832	0.99984053	FALSE
1320	PF3D7_0935800.e1_5085	-0.167012474	-0.081139596	0.085872877	0.628597688	0.99984053	FALSE
1321	PF3D7_0935800.e2_5959	-0.040496543	-0.098011548	-0.057515006	0.661549413	0.99984053	FALSE
1322	PF3D7_0935800.e9_9148	-0.266147838	0.041177424	0.307325262	0.344349889	0.99984053	FALSE
1323	PF3D7_0935900.e1s1_8599	-0.04473944	-0.134493853	-0.089754413	0.813882995	0.99984053	FALSE
1324	PF3D7_0935900.e2s1_9232	-0.320294274	-0.092457484	0.22783679	0.434049832	0.99984053	FALSE
1325	PF3D7_0936200.2o2_4952	-0.121257821	-0.014372753	0.106885068	0.671209593	0.99984053	FALSE
1326	PF3D7_0936300.2o2_8152	-0.115402363	-0.172652825	-0.057250462	0.710444194	0.99984053	FALSE
1327	PF3D7_0936400.2o2_8989	-0.162130436	-0.019733029	0.142397407	0.399598972	0.99984053	FALSE
1328	PF3D7_0936500.iso1.exon1.amp1_973	-0.081886509	-0.114339599	-0.03245309	0.758965142	0.99984053	FALSE
1329	PF3D7_0936600.2o2_6426	-0.100753969	-0.101737867	-0.000983899	0.993877096	0.99984053	FALSE
1330	PF3D7_0936700.1o1_7018	-0.204476123	-0.175707329	0.028768794	0.888510823	0.99984053	FALSE
1331	PF3D7_0936800.e2s1_5455	-0.222566557	-0.125460186	0.097106371	0.650639379	0.99984053	FALSE
1332	PF3D7_0937000.2o2_6410	-0.082957867	0.076367488	0.159325355	0.477788631	0.99984053	FALSE
1333	PF3D7_0937200.1o1_7291	-0.339155667	-0.16078886	0.178366807	0.547270089	0.99984053	FALSE
1334	PF3D7_0937300.iso1.exon2.amp1_3309	-0.30634681	-0.058976288	0.247370522	0.334519324	0.99984053	FALSE
1335	PF3D7_0937400.iso1.exon2.amp1_1296	-0.349178167	-0.175558262	0.173619905	0.506352836	0.99984053	FALSE
1336	PF3D7_0937500.iso1.exon1.amp1_4176	-0.204252097	-0.217080362	-0.012828266	0.957470342	0.99984053	FALSE
1337	PF3D7_0937600.iso1.exon1.amp1_2479	-0.037838693	-0.056444065	-0.018605373	0.855808431	0.99984053	FALSE
1338	PF3D7_0937600.iso1.exon2.amp1_3322	-0.001664672	0.015849362	0.017514034	0.935233886	0.99984053	FALSE
1339	PF3D7_0937700.iso1.exon2.amp1_713	-0.275993962	-0.289064447	-0.013070485	0.96658993	0.99984053	FALSE
1340	PF3D7_0937800.iso1.exon1.amp1_2169	-0.118760592	-0.10099158	0.017769012	0.837424804	0.99984053	FALSE
1341	PF3D7_0937800.iso1.exon2.amp1_1654	-0.116172261	-0.165663594	-0.049491334	0.690717378	0.99984053	FALSE
1342	PF3D7_1000100.iso1.exon2.amp1_3908	-0.175942503	-0.189303027	-0.013360523	0.933188399	0.99984053	FALSE
1343	PF3D7_1000200.iso1.exon1.amp1_1575	-0.113424912	-0.037948725	0.075476187	0.730389391	0.99984053	FALSE
1344	PF3D7_1000300.iso1.exon1.amp1_3601	-0.224701593	-0.104207028	0.120494566	0.522674436	0.99984053	FALSE
1345	PF3D7_1000400.iso1.exon1.amp1_1864	-0.236966323	-0.294986609	-0.058020285	0.8132208	0.99984053	FALSE
1346	PF3D7_1000500.iso1.exon3.amp1_4465	-0.313638203	-0.23380657	0.079831634	0.775829802	0.99984053	FALSE
1347	PF3D7_1001300.2o2_6130	-0.026132788	-0.069920342	-0.043787554	0.852738622	0.99984053	FALSE
1348	PF3D7_1001500.1o1_6967	-0.051090428	-0.056348162	-0.005257733	0.980356955	0.99984053	FALSE
1349	PF3D7_1001600.2o2_4757	-0.165103376	0.072675196	0.237778572	0.123701051	0.99984053	FALSE
1350	PF3D7_1001700.2o2_9009	-0.076465555	0.016401423	0.092866978	0.539051264	0.99984053	FALSE
1351	PF3D7_1001900.2o2_7282	-0.26103814	-0.097640149	0.163397991	0.483735033	0.99984053	FALSE
1352	PF3D7_1002100.2o2_7048	-0.042034591	-0.065545313	-0.023510722	0.886351717	0.99984053	FALSE
1353	PF3D7_1002500.1o3_8986	-0.221510808	-0.202104619	0.019406189	0.954467349	0.99984053	FALSE
1354	PF3D7_1002800.e1s2_6354	-0.173602434	-0.082930023	0.09067241	0.327922542	0.99984053	FALSE
1355	PF3D7_1003100.iso1.exon3.amp1_38	-0.140620604	-0.08272532	0.057895283	0.789405451	0.99984053	FALSE
1356	PF3D7_1003400.iso1.exon1.amp3_seg2_2299	-0.167589411	-0.184310071	-0.01672066	0.92834793	0.99984053	FALSE
1357	PF3D7_1003600.e1s1_8919	-0.031667576	-0.136399213	-0.104731637	0.239986706	0.99984053	FALSE
1358	PF3D7_1003800.e1s2_7780	-0.062023788	0.000558025	0.062581813	0.764113792	0.99984053	FALSE
1359	PF3D7_1004200.e2s2_6055	-0.083938444	0.000369846	0.08430829	0.475268005	0.99984053	FALSE
1360	PF3D7_1004300.iso1.exon1.amp2_2505	0.101100263	-0.038910896	-0.140011159	0.57235568	0.99984053	FALSE
1361	PF3D7_1004800.2o3_6717	-0.227333504	-0.170681641	0.056651863	0.8465332	0.99984053	FALSE
1362	PF3D7_1005000.1o1_7075	-0.086828185	-0.084382826	0.002445358	0.988735402	0.99984053	FALSE
1363	PF3D7_1005300.2o2_8452	-0.20491744	-0.040538804	0.164378635	0.238916841	0.99984053	FALSE
1364	PF3D7_1005500.e2s1_9236	-0.087790425	-0.027144748	0.060645677	0.679061016	0.99984053	FALSE
1365	PF3D7_1005700.iso1.exon2.amp1_3583	-0.105617446	-0.05889488	0.046722566	0.612231052	0.99984053	FALSE
1366	PF3D7_1006000.iso1.exon2.amp1_1866	-0.111131314	-0.091953432	0.019177881	0.871306015	0.99984053	FALSE
1367	PF3D7_1006500.1o1_7278	-0.121090985	-0.176760533	-0.055669548	0.711840901	0.99984053	FALSE
1368	PF3D7_1007000.iso1.exon8.amp1_631	-0.051396842	-0.268323503	-0.216926661	0.095743361	0.99984053	FALSE
1369	PF3D7_1007300.iso1.exon1.amp1_3315	-0.172552137	-0.09532389	0.077228248	0.503016169	0.99984053	FALSE
1370	PF3D7_1007700.e1s1_6640	-0.272932028	-0.313578618	-0.04064659	0.908099833	0.99984053	FALSE
1371	PF3D7_1007700.e1s2_8091	-0.165331256	-0.243051602	-0.077720346	0.778466126	0.99984053	FALSE
1372	PF3D7_1007800.iso1.exon1.amp1_1414	-0.06720639	-0.126749263	-0.059542873	0.845704551	0.99984053	FALSE
1373	PF3D7_1008000.s2_8597	-0.178481741	-0.185732363	-0.007250622	0.969809137	0.99984053	FALSE
1374	PF3D7_1008100.s1_7726	-0.109848991	-0.182500086	-0.072651095	0.697747047	0.99984053	FALSE
1375	PF3D7_1008100.s3_5986	-0.12711347	-0.15233624	-0.025222771	0.902825022	0.99984053	FALSE
1376	PF3D7_1008200.iso1.exon1.amp1_2743	-0.061875078	-0.095940349	-0.034065271	0.8808275	0.99984053	FALSE
1377	PF3D7_1008400.e1s1_5157	-0.155964346	0.055094511	0.211058856	0.116374402	0.99984053	FALSE
1378	PF3D7_1008600.1o1_6726	-0.089452745	-0.129107173	-0.039654428	0.855109061	0.99984053	FALSE
1379	PF3D7_1008700.e3s1_6589	-0.090902138	-0.044198674	0.046703464	0.708457352	0.99984053	FALSE
1380	PF3D7_1008800.e1s1_8915	-0.114489949	-0.146640412	-0.032150464	0.8258693	0.99984053	FALSE
1381	PF3D7_1009000.1o1_8727	-0.071992485	-0.092040935	-0.020048449	0.886237745	0.99984053	FALSE
1382	PF3D7_1009300.iso1.exon1.amp1_1604	-0.069268063	-0.05440516	0.014862903	0.885987431	0.99984053	FALSE
1383	PF3D7_1009500.e3_5958	-0.049338006	-0.109762566	-0.060424559	0.530052335	0.99984053	FALSE
1384	PF3D7_1009600.iso1.exon3.amp1_2459	-0.130164052	-0.097574452	0.0325896	0.879171431	0.99984053	FALSE
1385	PF3D7_1010200.iso1.exon1.amp2_1917	-0.044930534	0.041113046	0.08604358	0.301466903	0.99984053	FALSE
1386	PF3D7_1010900.iso1.exon2.amp1_108	-0.080797946	-0.141578928	-0.060780982	0.645340498	0.99984053	FALSE
1387	PF3D7_1011300.1o1_5319	-0.041167076	-0.079400937	-0.038233861	0.789373046	0.99984053	FALSE
1388	PF3D7_1011400.1o1_6697	-0.139312085	-0.050685241	0.088626844	0.703671656	0.99984053	FALSE
1389	PF3D7_1011500.1o1_7558	-0.067087644	-0.077753404	-0.01066576	0.924525961	0.99984053	FALSE
1390	PF3D7_1011700 (renamed)_6433	-0.101724927	0.011503256	0.113228183	0.672576884	0.99984053	FALSE
1391	PF3D7_1011800.e1s2_7200	-0.04667001	-0.013641324	0.033028686	0.712953492	0.99984053	FALSE
1392	PF3D7_1011900.iso1.exon4.amp1_2357	-0.313814481	-0.184316587	0.129497893	0.668330666	0.99984053	FALSE
1393	PF3D7_1012000.iso1.exon1.amp1_2737	-0.063377382	-0.104142834	-0.040765452	0.801179304	0.99984053	FALSE
1394	PF3D7_1012000.iso1.exon9.amp1_3295	-0.050468666	-0.060357446	-0.00988878	0.876397028	0.99984053	FALSE
1395	PF3D7_1012100.iso1.exon1.amp1_2444	-0.020159975	-0.00199371	0.018166265	0.819278934	0.99984053	FALSE
1396	PF3D7_1012200.1o2_8148	-0.175299737	0.039878052	0.215177789	0.42056148	0.99984053	FALSE
1397	PF3D7_1012400.e3s1_5724	-0.187320071	-0.110554087	0.076765984	0.77288795	0.99984053	FALSE
1398	PF3D7_1012500.e1s1_9230	-0.285186805	-0.118659536	0.16652727	0.581350159	0.99984053	FALSE
1399	PF3D7_1012600.e1s1_9222	-0.170884935	-0.12581762	0.045067314	0.82793168	0.99984053	FALSE
1400	PF3D7_1012700.e1s1_7980	-0.207899427	-0.132751829	0.075147598	0.645186644	0.99984053	FALSE
1401	PF3D7_1012700.e1s2_6240	-0.11926016	-0.18325405	-0.063993891	0.683658913	0.99984053	FALSE
1402	PF3D7_1013100.1o2_5076	-0.048685897	0.000902887	0.049588784	0.609468459	0.99984053	FALSE
1403	PF3D7_1013100.2o2_4787	-0.085979215	-0.062472137	0.023507078	0.849626457	0.99984053	FALSE
1404	PF3D7_1013200.iso1.exon1.amp1_4310	-0.034089874	-0.08154656	-0.047456686	0.682374448	0.99984053	FALSE
1405	PF3D7_1013200.iso1.exon1.amp2_2506	-0.001362194	-0.115019403	-0.113657209	0.314294797	0.99984053	FALSE
1406	PF3D7_1013400.iso1.exon9.amp1_3307	-0.215987617	-0.09326603	0.122721586	0.440004984	0.99984053	FALSE
1407	PF3D7_1013700.iso1.exon1.amp1_3828	-0.126721782	-0.050396903	0.076324879	0.628316362	0.99984053	FALSE
1408	PF3D7_1013900.iso1.exon1.amp2_seg2_4622	-0.251082474	-0.356622174	-0.1055397	0.517275912	0.99984053	FALSE
1409	PF3D7_1014000.iso1.exon6.amp1_1249	-0.136889166	-0.095941233	0.040947933	0.763642163	0.99984053	FALSE
1410	PF3D7_1014000.iso1.exon7.amp1_955	-0.304943034	-0.097000735	0.207942299	0.366053645	0.99984053	FALSE
1411	PF3D7_1014100.s1_5371	-0.153850341	0.064423048	0.21827339	0.46148792	0.99984053	FALSE
1412	PF3D7_1014100.s2_5660	-0.008554956	-0.200943527	-0.192388571	0.479986255	0.99984053	FALSE
1413	PF3D7_1014300.e1s3_6628	-0.039039296	-0.117580593	-0.078541297	0.339780745	0.99984053	FALSE
1414	PF3D7_1014500.iso1.exon1.amp2_3369	-0.06093296	-0.15804138	-0.09710842	0.510206929	0.99984053	FALSE
1415	PF3D7_1014600 (renamed, has duplicates)_5653	-0.06027923	-0.093309691	-0.033030461	0.835351992	0.99984053	FALSE
1416	PF3D7_1014600.e1s2_7100	-0.196700985	-0.203814596	-0.007113611	0.959524968	0.99984053	FALSE
1417	PF3D7_1014600.e1s3_8257	-0.204133356	-0.151184283	0.052949073	0.764927607	0.99984053	FALSE
1418	PF3D7_1014800.6o11_8787	-0.124143612	-0.176307663	-0.052164051	0.728593268	0.99984053	FALSE
1419	PF3D7_1014800.7o11_8498	-0.324063071	-0.045136662	0.278926409	0.190735392	0.99984053	FALSE
1420	PF3D7_1014900.iso1.exon1.amp1_3710	-0.018491768	-0.030733415	-0.012241647	0.904107654	0.99984053	FALSE
1421	PF3D7_1015100.1o1_9044	0.039554159	-0.205390215	-0.244944374	0.186979606	0.99984053	FALSE
1422	PF3D7_1015200.iso1.exon3.amp1_1792	-0.121515313	-0.094670723	0.02684459	0.88696592	0.99984053	FALSE
1423	PF3D7_1015500.1o1_8772	-0.181738537	-0.124791725	0.056946812	0.665101681	0.99984053	FALSE
1424	PF3D7_1015900.e2s1_5752	-0.366079203	-0.138664054	0.227415149	0.450078174	0.99984053	FALSE
1425	PF3D7_1016000.iso1.exon1.amp1_1018	-0.106044065	-0.015740162	0.090303902	0.308647653	0.99984053	FALSE
1426	PF3D7_1016200.1o1_8491	-0.165122658	-0.114502283	0.050620375	0.786170207	0.99984053	FALSE
1427	PF3D7_1016300.e1s1_5130	-0.102638204	0.059429901	0.162068106	0.484336087	0.99984053	FALSE
1428	PF3D7_1016500.e1s1_7472	-0.188191154	-0.122447557	0.065743597	0.671967785	0.99984053	FALSE
1429	PF3D7_1016500.e2s1_8376	-0.07433268	-0.114791449	-0.040458769	0.695538903	0.99984053	FALSE
1430	PF3D7_1016700.iso1.exon2.amp1_3820	-0.220213928	-0.064131045	0.156082883	0.464525749	0.99984053	FALSE
1431	PF3D7_1016900.e1s1_4855	-0.199308613	-0.087776368	0.111532245	0.408259098	0.99984053	FALSE
1432	PF3D7_1017000.e1s1_7482	-0.18848039	-0.106787869	0.081692521	0.623195269	0.99984053	FALSE
1433	PF3D7_1017000.e1s2_7193	-0.104468553	-0.094846612	0.009621941	0.936437414	0.99984053	FALSE
1434	PF3D7_1017100.1o1_6988	-0.131260854	-0.049193819	0.082067035	0.563340006	0.99984053	FALSE
1435	PF3D7_1017300.1.2o2_6764	-0.022902705	-0.199273009	-0.176370304	0.205839705	0.99984053	FALSE
1436	PF3D7_1017800.iso1.exon3.amp1_1681	-0.135918217	-0.046843621	0.089074596	0.402958834	0.99984053	FALSE
1437	PF3D7_1017800.iso1.exon3.amp2_1970	-0.285164421	-0.02667513	0.258489291	0.133488737	0.99984053	FALSE
1438	PF3D7_1017900.e2s1_5746	-0.221803484	-0.166861778	0.054941706	0.830904756	0.99984053	FALSE
1439	PF3D7_1018000.1o1_8202	0.024820043	-0.128116097	-0.152936139	0.194059859	0.99984053	FALSE
1440	PF3D7_1018100.1o1_6997	-0.015300407	-0.092151852	-0.076851446	0.279540152	0.99984053	FALSE
1441	PF3D7_1018300.e1s1_5945	-0.147726852	-0.167608271	-0.019881419	0.912001095	0.99984053	FALSE
1442	PF3D7_1018300.e2s2_5481	-0.378944807	-0.135996796	0.242948011	0.26184073	0.99984053	FALSE
1443	PF3D7_1019000.e1s1_6639	-0.123638242	-0.152531601	-0.028893359	0.814560893	0.99984053	FALSE
1444	PF3D7_1019000.e1s2_6350	-0.095012469	-0.123105145	-0.028092676	0.811146116	0.99984053	FALSE
1445	PF3D7_1019300.iso1.exon1.amp2_1043	-0.159764128	-0.199505957	-0.039741829	0.847103304	0.99984053	FALSE
1446	PF3D7_1019400.e2s1_9178	-0.192562398	-0.101890275	0.090672123	0.519870239	0.99984053	FALSE
1447	PF3D7_1019500.1.6o25_6176	-0.194161806	-0.030052738	0.164109068	0.255507979	0.99984053	FALSE
1448	PF3D7_1019500.1.9o25_6465	-0.264677135	-0.050837048	0.213840086	0.419534317	0.99984053	FALSE
1449	PF3D7_1020200.e2s1_4857	-0.09433453	-0.108416386	-0.014081855	0.887304891	0.99984053	FALSE
1450	PF3D7_1020200.e3s1_5754	0.043341298	-0.042988395	-0.086329693	0.403303403	0.99984053	FALSE
1451	PF3D7_1020300.e1s1_7784	-0.027053022	-0.095857901	-0.068804878	0.612161296	0.99984053	FALSE
1452	PF3D7_1020500.1o1_4727	-0.046043783	0.024180607	0.070224389	0.379597502	0.99984053	FALSE
1453	PF3D7_1020700.e1s1_7201	-0.073747537	-0.015774088	0.057973449	0.666643407	0.99984053	FALSE
1454	PF3D7_1020700.e1s2_8363	-0.184768296	-0.167472398	0.017295898	0.912247774	0.99984053	FALSE
1455	PF3D7_1020800.11o11_6470	-0.195371735	-0.13595067	0.059421065	0.785805762	0.99984053	FALSE
1456	PF3D7_1021000.iso1.exon2.amp1_3284	-0.336105912	-0.132922621	0.203183291	0.458775245	0.99984053	FALSE
1457	PF3D7_1021000.iso1.exon4.amp1_1510	-0.108653062	-0.148585804	-0.039932742	0.783228043	0.99984053	FALSE
1458	PF3D7_1021200.1o1_6485	-0.2595509	-0.225905067	0.033645833	0.922846491	0.99984053	FALSE
1459	PF3D7_1021500.iso1.exon1.amp1_154	-0.100242351	-0.26971716	-0.169474809	0.399374061	0.99984053	FALSE
1460	PF3D7_1021600.e1s1_6028	-0.094134692	0.014417595	0.108552288	0.454202953	0.99984053	FALSE
1461	PF3D7_1021700.e1s2_6931	-0.243207523	-0.128398805	0.114808718	0.651437351	0.99984053	FALSE
1462	PF3D7_1021700.e1s3_8087	-0.124301414	-0.043032845	0.081268569	0.661007849	0.99984053	FALSE
1463	PF3D7_1021700.e2s2_7510	-0.13608959	0.033429038	0.169518628	0.194398812	0.99984053	FALSE
1464	PF3D7_1021700.e3s1_8324	-0.214404938	-0.141381074	0.073023864	0.763587606	0.99984053	FALSE
1465	PF3D7_1021800.iso1.exon2.amp1_3703	-0.110773509	-0.190458754	-0.079685246	0.459308009	0.99984053	FALSE
1466	PF3D7_1021900.e1s2_5472	-0.14846165	0.003140378	0.151602027	0.283763989	0.99984053	FALSE
1467	PF3D7_1021900.e1s3_6056	-0.197843276	-0.051681092	0.146162184	0.335380175	0.99984053	FALSE
1468	PF3D7_1022000.e2_4806	-0.264725767	-0.171732365	0.092993402	0.642884752	0.99984053	FALSE
1469	PF3D7_1022200.e2s1_5154	-0.135920238	-0.092196223	0.043724015	0.813161584	0.99984053	FALSE
1470	PF3D7_1022300.2o6_4974	-0.227798157	-0.221825077	0.00597308	0.982585626	0.99984053	FALSE
1471	PF3D7_1022700.1o1_7854	-0.03482959	-0.105482947	-0.070653357	0.676491519	0.99984053	FALSE
1472	PF3D7_1023100.e1s3_6525	-0.091090742	-0.06714593	0.023944813	0.806418474	0.99984053	FALSE
1473	PF3D7_1023100.e1s4_6236	-0.231718608	-0.113068527	0.118650082	0.496115494	0.99984053	FALSE
1474	PF3D7_1023100.e1s6_5941	-0.14043453	-0.113066753	0.027367777	0.93185317	0.99984053	FALSE
1475	PF3D7_1023200.1o1_6706	-0.282656955	-0.00095733	0.281699626	0.228755858	0.99984053	FALSE
1476	PF3D7_1023900.s3_8307	-0.069386554	-0.051171338	0.018215217	0.899555842	0.99984053	FALSE
1477	PF3D7_1024000.iso1.exon1.amp1_1314	-0.039175282	-0.122120006	-0.082944724	0.430074572	0.99984053	FALSE
1478	PF3D7_1024300.1o1_7540	-0.115603207	-0.076385981	0.039217225	0.862437171	0.99984053	FALSE
1479	PF3D7_1024400.1o2_7617	-0.196349106	-0.072626282	0.123722825	0.587033535	0.99984053	FALSE
1480	PF3D7_1024800.e2s2_5767	-0.14063888	-0.06672247	0.07391641	0.747456675	0.99984053	FALSE
1481	PF3D7_1026500.iso1.exon1.amp1_1214	-0.161316978	-0.047492098	0.113824879	0.335120726	0.99984053	FALSE
1482	PF3D7_1026900.1o1_7582	-0.208169691	-0.107754932	0.100414759	0.670768532	0.99984053	FALSE
1483	PF3D7_1027000.iso1.exon1.amp2_seg1_3452	-0.04559359	-0.134796402	-0.089202812	0.615578861	0.99984053	FALSE
1484	PF3D7_1027400.iso1.exon1.amp1_87	-0.161407576	-0.103388151	0.058019425	0.650243685	0.99984053	FALSE
1485	PF3D7_1028000.iso1.exon2.amp1_1224	-0.198588185	-0.056340338	0.142247846	0.355364566	0.99984053	FALSE
1486	PF3D7_1028300.e1s1_5740	-0.170707887	-0.145105622	0.025602264	0.907284217	0.99984053	FALSE
1487	PF3D7_1028700.1o1_8478	-0.211180514	-0.090384004	0.12079651	0.583008043	0.99984053	FALSE
1488	PF3D7_1028900.2o2_7542	-0.035946889	-0.078453637	-0.042506748	0.749176581	0.99984053	FALSE
1489	PF3D7_1029400.1o1_7611	-0.058678208	-0.105660813	-0.046982605	0.783318098	0.99984053	FALSE
1490	PF3D7_1029500.1o1_4650	-0.293487181	-0.123851622	0.169635559	0.561477326	0.99984053	FALSE
1491	PF3D7_1030200.1o1_4717	-0.254707427	0.159400583	0.414108011	0.120695073	0.99984053	FALSE
1492	PF3D7_1030400.2o2_6704	-0.055144132	-0.020631924	0.034512208	0.845987791	0.99984053	FALSE
1493	PF3D7_1030500.1o1_4988	-0.222483621	-0.189076831	0.03340679	0.893433023	0.99984053	FALSE
1494	PF3D7_1030700.iso1.exon1.amp1_391	-0.269822317	-0.245333645	0.024488671	0.921877795	0.99984053	FALSE
1495	PF3D7_1030800.1o1_5237	-0.153791687	-0.21900607	-0.065214382	0.788633049	0.99984053	FALSE
1496	PF3D7_1031500.iso1.exon1.amp1_1891	-0.031983838	-0.065902977	-0.033919139	0.781909598	0.99984053	FALSE
1497	PF3D7_1031500.iso1.exon4.amp1_656	-0.167274686	-0.08974755	0.077527137	0.637517436	0.99984053	FALSE
1498	PF3D7_1031800.iso1.exon1.amp1_698	-0.213147202	-0.169512812	0.04363439	0.840320809	0.99984053	FALSE
1499	PF3D7_1032100.iso1.exon1.amp1_3724	-0.063240688	-0.112829125	-0.049588437	0.692365675	0.99984053	FALSE
1500	PF3D7_1032100.iso1.exon1.amp2_4232	-0.123136431	-0.13583252	-0.012696089	0.936029939	0.99984053	FALSE
1501	PF3D7_1032400.3o7_4720	-0.135777883	-0.109752272	0.026025611	0.861614366	0.99984053	FALSE
1502	PF3D7_1032900.e1s1_8259	-0.125014865	-0.22235246	-0.097337596	0.611421197	0.99984053	FALSE
1503	PF3D7_1033700.e3s1_8911	-0.146197144	-0.129588479	0.016608665	0.927580009	0.99984053	FALSE
1504	PF3D7_1033800.8o8_9037	-0.276770959	-0.165556373	0.111214586	0.682426007	0.99984053	FALSE
1505	PF3D7_1034100.iso1.exon2.amp1_2074	-0.299315866	-0.152164414	0.147151452	0.616471576	0.99984053	FALSE
1506	PF3D7_1034500.iso1.exon2.amp2_seg1_573	-0.141237984	-0.10096491	0.040273075	0.734698943	0.99984053	FALSE
1507	PF3D7_1034700.1o1_4662	-0.24753323	-0.093230834	0.154302396	0.4885444	0.99984053	FALSE
1508	PF3D7_1034900.e1s1_8260	-0.217672296	-0.161036577	0.056635719	0.773953601	0.99984053	FALSE
1509	PF3D7_1035000.1o1_8245	-0.035661923	-0.046271576	-0.010609653	0.922096756	0.99984053	FALSE
1510	PF3D7_1035100.1o1_8208	-0.202199416	-0.208203723	-0.006004308	0.9697207	0.99984053	FALSE
1511	PF3D7_1035200.1o1_4741	-0.12847846	-0.089543149	0.038935311	0.757704366	0.99984053	FALSE
1512	PF3D7_1035300.iso1.exon1.amp1_2847	-0.138781492	-0.103132028	0.035649464	0.815056456	0.99984053	FALSE
1513	PF3D7_1035300.iso1.exon1.amp2_3364	-0.187146862	-0.07266026	0.114486602	0.158027836	0.99984053	FALSE
1514	PF3D7_1035600.1o1_6162	-0.063690543	-0.093474276	-0.029783733	0.68191925	0.99984053	FALSE
1515	PF3D7_1035700.e1s1_8948	-0.149097051	-0.065322341	0.083774709	0.481378939	0.99984053	FALSE
1516	PF3D7_1035800.1o1_5041	0.135828725	-0.199986247	-0.335814972	0.287111954	0.99984053	FALSE
1517	PF3D7_1035900.1o1_5890	-0.273901758	0.191996633	0.465898391	0.096705148	0.99984053	FALSE
1518	PF3D7_1036000.1o1_5293	-0.167925835	-0.06875434	0.099171495	0.58601015	0.99984053	FALSE
1519	PF3D7_1036300.1o1_6786	-0.212476107	-0.047648231	0.164827876	0.451271503	0.99984053	FALSE
1520	PF3D7_1036400.1o2_6117	-0.184042257	0.099715821	0.283758078	0.229837211	0.99984053	FALSE
1521	PF3D7_1036400.e2s2_6540	-0.131730773	0.094295855	0.226026628	0.150294395	0.99984053	FALSE
1522	PF3D7_1036500.1o1_6762	-0.138612146	-0.252967136	-0.11435499	0.621925392	0.99984053	FALSE
1523	PF3D7_1036600.iso1.exon3.amp1_3273	-0.235724286	-0.218605967	0.017118319	0.943727416	0.99984053	FALSE
1524	PF3D7_1036600.iso2.exon3.amp1_3851	-0.2768127	-0.202452625	0.074360075	0.775906465	0.99984053	FALSE
1525	PF3D7_1036900.e1s2_5948	-0.229951144	-0.224899509	0.005051635	0.981665071	0.99984053	FALSE
1526	PF3D7_1036900.e2s1_6576	-0.202006266	-0.113522265	0.088484001	0.709824102	0.99984053	FALSE
1527	PF3D7_1037000.iso1.exon3.amp1_4275	-0.22162864	-0.067448252	0.154180389	0.280592448	0.99984053	FALSE
1528	PF3D7_1037000.iso1.exon3.amp2_4564	-0.222442363	-0.036391492	0.186050871	0.171643249	0.99984053	FALSE
1529	PF3D7_1037100.1o1_9098	-0.146682249	-0.06690726	0.079774989	0.650165413	0.99984053	FALSE
1530	PF3D7_1037200.10o12_7895	-0.173265955	-0.135444841	0.037821114	0.857123469	0.99984053	FALSE
1531	PF3D7_1037600.e2s1_7184	-0.262619289	-0.117225486	0.145393803	0.599857048	0.99984053	FALSE
1532	PF3D7_1037600.e3s1_6616	-0.264356177	-0.13459424	0.129761937	0.633726902	0.99984053	FALSE
1533	PF3D7_1038400.e1s1_8544	-0.233303964	-0.142725837	0.090578127	0.340709793	0.99984053	FALSE
1534	PF3D7_1038400.e3s1_7460	-0.341833033	-0.119322061	0.222510972	0.301812552	0.99984053	FALSE
1535	PF3D7_1038400.e7s1_7389	-0.179350396	-0.109543608	0.069806788	0.578534621	0.99984053	FALSE
1536	PF3D7_1038500.2o2_4992	-0.082439495	0.05184299	0.134282485	0.303013716	0.99984053	FALSE
1537	PF3D7_1038600.2o2_8191	-0.004386932	-0.128141403	-0.123754472	0.31122145	0.99984053	FALSE
1538	PF3D7_1038900.e1s1_9213	-0.093808764	-0.100385251	-0.006576487	0.96311426	0.99984053	FALSE
1539	PF3D7_1039700.iso1.exon1.amp1_1851	-0.337048614	-0.24421266	0.092835953	0.647476389	0.99984053	FALSE
1540	PF3D7_1039900.iso1.exon2.amp1_3588	-0.108392316	-0.069488179	0.038904137	0.685616174	0.99984053	FALSE
1541	PF3D7_1040000.iso1.exon2.amp1_1585	-0.235440098	-0.270620791	-0.035180693	0.84970546	0.99984053	FALSE
1542	PF3D7_1040100.iso1.exon2.amp1_3299	-0.237889119	-0.052371412	0.185517707	0.418180435	0.99984053	FALSE
1543	PF3D7_1040200.iso1.exon2.amp1_408	-0.241145795	-0.33450798	-0.093362184	0.69070984	0.99984053	FALSE
1544	PF3D7_1040300.iso1.exon2.amp1_997	-0.247773453	-0.380390983	-0.13261753	0.628077085	0.99984053	FALSE
1545	PF3D7_1040400.iso1.exon2.amp1_2156	-0.282341571	-0.244087364	0.038254207	0.863101077	0.99984053	FALSE
1546	PF3D7_1040500.iso1.exon2.amp1_2735	-0.159178787	-0.273400286	-0.114221499	0.709000476	0.99984053	FALSE
1547	PF3D7_1040600.iso1.exon2.amp1_2150	-0.123036247	-0.151942217	-0.02890597	0.873214571	0.99984053	FALSE
1548	PF3D7_1040700.iso1.exon2.amp1_419	-0.24930383	-0.240284056	0.009019773	0.970135225	0.99984053	FALSE
1549	PF3D7_1040900.iso1.exon2.amp1_2143	-0.233484749	-0.108764188	0.124720561	0.603052741	0.99984053	FALSE
1550	PF3D7_1041000.iso1.exon2.amp1_1280	-0.198536691	-0.154739989	0.043796703	0.798818327	0.99984053	FALSE
1551	PF3D7_1041100.iso1.exon2.amp1_3013	-0.231963734	-0.168119643	0.063844091	0.777995684	0.99984053	FALSE
1552	PF3D7_1041200.iso1.exon2.amp1_2153	-0.375430094	-0.290804298	0.084625796	0.770533223	0.99984053	FALSE
1553	PF3D7_1041300.iso1.exon1.amp1_1293	-0.064701081	-0.288427319	-0.223726237	0.200888105	0.99984053	FALSE
1554	PF3D7_1041300.iso1.exon2.amp1_498	-0.067750047	-0.104147354	-0.036397307	0.579577614	0.99984053	FALSE
1555	PF3D7_1041300.iso1.exon2.amp2_787	-0.072380414	-0.159916249	-0.087535835	0.466751017	0.99984053	FALSE
1556	PF3D7_1100100.iso1.exon1.amp1_4545	-0.060362909	-0.117231318	-0.056868408	0.623233499	0.99984053	FALSE
1557	PF3D7_1100100.iso1.exon2.amp1_1582	-0.174707619	-0.261345868	-0.08663825	0.669655507	0.99984053	FALSE
1558	PF3D7_1100200.e1s1_7391	-0.170153073	-0.047697256	0.122455817	0.337155758	0.99984053	FALSE
1559	PF3D7_1100200.e1s2_8548	-0.138614342	-0.05593884	0.082675502	0.493617088	0.99984053	FALSE
1560	PF3D7_1100200.e1s3_7392	-0.154586243	-0.037485882	0.117100361	0.205793632	0.99984053	FALSE
1561	PF3D7_1100300.iso1.exon2.amp1_4474	-0.254534177	-0.225675788	0.028858389	0.887576617	0.99984053	FALSE
1562	PF3D7_1100400.iso1.exon2.amp1_3590	-0.180327688	-0.35620926	-0.175881572	0.457008384	0.99984053	FALSE
1563	PF3D7_1100500.iso1.exon1.amp1_699	-0.231754923	0.040792099	0.272547022	0.255009781	0.99984053	FALSE
1564	PF3D7_1100800.2o2_4959	-0.072879917	-0.068504688	0.00437523	0.970261682	0.99984053	FALSE
1565	PF3D7_1101100.iso1.exon1.amp1_3897	-0.329057224	-0.269059941	0.059997283	0.809070126	0.99984053	FALSE
1566	PF3D7_1101200.iso1.exon1.amp1_3319	-0.261523352	-0.197387862	0.06413549	0.788245513	0.99984053	FALSE
1567	PF3D7_1101300.iso1.exon1.amp1_2434	-0.239089707	-0.173657824	0.065431883	0.754715026	0.99984053	FALSE
1568	PF3D7_1101500.iso1.exon1.amp1_3877	-0.175791009	-0.057752009	0.118039	0.265670992	0.99984053	FALSE
1569	PF3D7_1101700.iso1.exon2.amp1_2140	-0.307184023	-0.30785507	-0.000671046	0.997366154	0.99984053	FALSE
1570	PF3D7_1102200.iso1.exon1.amp1_2170	-0.245010352	-0.245380728	-0.000370376	0.998469785	0.99984053	FALSE
1571	PF3D7_1102400.1o1_6766	-0.145534246	-0.088640565	0.056893681	0.633528822	0.99984053	FALSE
1572	PF3D7_1102500.e2s1_5459	-0.126587274	0.045617388	0.172204662	0.166658023	0.99984053	FALSE
1573	PF3D7_1102700.iso1.exon1.amp1_375	-0.265342763	-0.125448365	0.139894397	0.596048878	0.99984053	FALSE
1574	PF3D7_1102800.iso1.exon1.amp1_671	-0.099106877	-0.091846748	0.007260129	0.967885101	0.99984053	FALSE
1575	PF3D7_1103000.iso1.exon1.amp1_1212	-0.166020746	-0.095516025	0.070504721	0.575048739	0.99984053	FALSE
1576	PF3D7_1103100.e2s1_8572	-0.221928791	-0.229566331	-0.007637539	0.978470694	0.99984053	FALSE
1577	PF3D7_1103500.13o13_6965	-0.033274938	-0.094937403	-0.061662466	0.452120245	0.99984053	FALSE
1578	PF3D7_1103500.1o13_8994	-0.119583838	-0.107037391	0.012546447	0.940679383	0.99984053	FALSE
1579	PF3D7_1103500.1o2_7831	-0.078647808	-0.149870861	-0.071223053	0.680422498	0.99984053	FALSE
1580	PF3D7_1103800.e1s1_7393	-0.331835643	-0.426955791	-0.095120147	0.780670591	0.99984053	FALSE
1581	PF3D7_1104000.1o3_6466	-0.107646795	-0.103727257	0.003919538	0.98686239	0.99984053	FALSE
1582	PF3D7_1104100.4o4_7289	-0.167439827	-0.207173251	-0.039733425	0.815727811	0.99984053	FALSE
1583	PF3D7_1104200.e1s2_5379	-0.142519877	-0.102866629	0.039653248	0.77378038	0.99984053	FALSE
1584	PF3D7_1104800.2o9_8185	-0.210288356	-0.10699559	0.103292766	0.608776437	0.99984053	FALSE
1585	PF3D7_1105200.iso1.exon3.amp1_951	-0.206193141	-0.105460037	0.100733104	0.568035493	0.99984053	FALSE
1586	PF3D7_1105600.e1s1_6922	-0.07644516	-0.100021317	-0.023576156	0.895591856	0.99984053	FALSE
1587	PF3D7_1105900.iso1.exon1.amp1_1541	-0.215200746	-0.090214155	0.124986591	0.404305448	0.99984053	FALSE
1588	PF3D7_1106100.iso1.exon4.amp1_381	-0.00292417	-0.026574735	-0.023650566	0.468569621	0.99984053	FALSE
1589	PF3D7_1106300.2o6_8231	-0.196737851	-0.180090398	0.016647453	0.907185093	0.99984053	FALSE
1590	PF3D7_1106700.iso1.exon1.amp2_772	0.012498092	-0.00606911	-0.018567201	0.797706444	0.99984053	FALSE
1591	PF3D7_1107400.iso1.exon1.amp1_3598	-0.097936864	-0.145583265	-0.047646401	0.785063047	0.99984053	FALSE
1592	PF3D7_1107500.iso1.exon5.amp1_2058	-0.228522107	-0.089274969	0.139247138	0.504166545	0.99984053	FALSE
1593	PF3D7_1107600.iso1.exon1.amp1_seg2_2908	-0.08935105	-0.180292781	-0.09094173	0.724565084	0.99984053	FALSE
1594	PF3D7_1107600.iso1.exon1.amp2_3661	0.060969023	-0.038252233	-0.099221256	0.502461695	0.99984053	FALSE
1595	PF3D7_1107800.e2s1_7678	-0.143551242	-0.205388642	-0.061837399	0.752569354	0.99984053	FALSE
1596	PF3D7_1107900.iso1.exon1.amp1_542	-0.137331793	-0.081762831	0.055568961	0.713266215	0.99984053	FALSE
1597	PF3D7_1108100.iso1.exon1.amp1_2831	0.081883164	-0.15229808	-0.234181244	0.339934197	0.99984053	FALSE
1598	PF3D7_1108600.e1s1_6906	-0.023173981	-0.093801738	-0.070627757	0.396016598	0.99984053	FALSE
1599	PF3D7_1109200.3o4_6218	-0.194974923	-0.013025626	0.181949297	0.338539065	0.99984053	FALSE
1600	PF3D7_1110200.e1s1_4895	-0.107624263	0.05569988	0.163324143	0.359304859	0.99984053	FALSE
1601	PF3D7_1110200.e1s2_6629	-0.157071172	-0.133687527	0.023383645	0.90417366	0.99984053	FALSE
1602	PF3D7_1110200.e2s1_6580	-0.054230456	-0.043775759	0.010454697	0.885179754	0.99984053	FALSE
1603	PF3D7_1110400.e3s2_7791	-0.063541323	-0.082713105	-0.019171782	0.904387339	0.99984053	FALSE
1604	PF3D7_1110700.e2s1_5162	-0.187783153	-0.028943981	0.158839172	0.381873072	0.99984053	FALSE
1605	PF3D7_1111000.1o1_6758	-0.059155063	-0.130939111	-0.071784048	0.582485965	0.99984053	FALSE
1606	PF3D7_1111300.1o1_8154	-0.153861377	-0.238405516	-0.08454414	0.71299046	0.99984053	FALSE
1607	PF3D7_1111400.iso1.exon1.amp1_2422	-0.049594481	-0.012644224	0.036950257	0.742658592	0.99984053	FALSE
1608	PF3D7_1111600.iso1.exon1.amp1_437	-0.109849803	-0.132930628	-0.023080824	0.817019149	0.99984053	FALSE
1609	PF3D7_1111800.iso1.exon1.amp1_2132	-0.26557257	-0.078005018	0.187567551	0.363905436	0.99984053	FALSE
1610	PF3D7_1111800.iso1.exon2.amp1_2710	-0.109026554	-0.067561118	0.041465436	0.810669503	0.99984053	FALSE
1611	PF3D7_1111900.iso1.exon1.amp1_693	-0.052158163	-0.098355595	-0.046197432	0.789977282	0.99984053	FALSE
1612	PF3D7_1112100.iso1.exon1.amp1_1397	0.133223172	0.032108704	-0.101114468	0.459786742	0.99984053	FALSE
1613	PF3D7_1112100.iso1.exon1.amp2_1686	0.014363983	-0.049505672	-0.063869654	0.409968949	0.99984053	FALSE
1614	PF3D7_1112100.iso1.exon1.amp3_2210	0.008120385	0.011138554	0.003018169	0.973725958	0.99984053	FALSE
1615	PF3D7_1112400.1o1_4663	-0.229943819	-0.111984292	0.117959527	0.605999499	0.99984053	FALSE
1616	PF3D7_1113000.iso1.exon2.amp1_1889	-0.208308952	-0.115789735	0.092519217	0.445968984	0.99984053	FALSE
1617	PF3D7_1113000.iso1.exon3.amp1_1542	-0.197897794	-0.115867016	0.082030777	0.768193255	0.99984053	FALSE
1618	PF3D7_1113000.iso1.exon5.amp1_118	-0.135802465	-0.068749957	0.067052509	0.514039467	0.99984053	FALSE
1619	PF3D7_1113000.iso1.exon7.amp3_1351	-0.18744111	-0.055448047	0.131993063	0.626543139	0.99984053	FALSE
1620	PF3D7_1113700.e1s1_8346	-0.306382444	-0.203092835	0.103289609	0.70471359	0.99984053	FALSE
1621	PF3D7_1114500.iso1.exon1.amp1_3323	-0.128140541	0.009928733	0.138069275	0.018363194	0.99984053	FALSE
1622	PF3D7_1114700.e1_8271	-0.159385057	-0.199459875	-0.040074818	0.865331859	0.99984053	FALSE
1623	PF3D7_1114900.e1s1_7681	-0.010697138	-0.119329204	-0.108632066	0.396051857	0.99984053	FALSE
1624	PF3D7_1114900.e1s2_9122	-0.01489966	-0.134812319	-0.119912659	0.437390048	0.99984053	FALSE
1625	PF3D7_1115200.2o7_7060	-0.091768691	-0.062295467	0.029473224	0.823136566	0.99984053	FALSE
1626	PF3D7_1115300.e1s1_7187	-0.159022196	-0.157322044	0.001700152	0.994386143	0.99984053	FALSE
1627	PF3D7_1115400.e1s1_6025	-0.093239829	-0.070384385	0.022855444	0.917342525	0.99984053	FALSE
1628	PF3D7_1115600.e3s1_6879	-0.198346513	-0.094892592	0.103453921	0.66810301	0.99984053	FALSE
1629	PF3D7_1115700.e1s1_7476	-0.244515576	-0.12406138	0.120454197	0.623931749	0.99984053	FALSE
1630	PF3D7_1116000.iso1.exon2.amp1_3093	-0.158621447	-0.140832754	0.017788692	0.924217112	0.99984053	FALSE
1631	PF3D7_1116000.iso1.exon2.amp2_3382	-0.198453308	-0.18328024	0.015173068	0.914048765	0.99984053	FALSE
1632	PF3D7_1116800.e4s1_7224	-0.358358426	-0.189323206	0.16903522	0.611715047	0.99984053	FALSE
1633	PF3D7_1117000.iso1.exon6.amp1_3500	-0.045070915	0.025066792	0.070137707	0.548196788	0.99984053	FALSE
1634	PF3D7_1117200.iso1.exon2.amp1_1104	-0.123548222	-0.058223813	0.065324409	0.552537778	0.99984053	FALSE
1635	PF3D7_1117800.iso1.exon1.amp1_264	-0.077708456	-0.005679138	0.072029318	0.459028042	0.99984053	FALSE
1636	PF3D7_1117900.iso1.exon1.amp1_2246	-0.172279834	-0.047194248	0.125085586	0.434273649	0.99984053	FALSE
1637	PF3D7_1118100.iso1.exon1.amp1_3510	-0.185614279	-0.088578537	0.097035742	0.596760355	0.99984053	FALSE
1638	PF3D7_1118100.iso1.exon2.amp1_2116	-0.234578541	-0.108294403	0.126284138	0.468694444	0.99984053	FALSE
1639	PF3D7_1118200.e1s1_7968	-0.085637999	-0.266947818	-0.181309819	0.431369409	0.99984053	FALSE
1640	PF3D7_1118300.e1s1_7205	-0.184015972	-0.125534736	0.058481236	0.800780403	0.99984053	FALSE
1641	PF3D7_1118800.2o7_5861	-0.20661624	-0.111490032	0.095126208	0.684026474	0.99984053	FALSE
1642	PF3D7_1119400.iso1.exon1.amp3_2783	-0.062634734	-0.120681616	-0.058046882	0.832619325	0.99984053	FALSE
1643	PF3D7_1119500.iso1.exon1.amp1_3300	-0.022845218	-0.038889668	-0.01604445	0.863127869	0.99984053	FALSE
1644	PF3D7_1119500.iso1.exon3.amp1_3827	-0.410718212	-0.183126749	0.227591464	0.403263387	0.99984053	FALSE
1645	PF3D7_1119700.iso1.exon1.amp1_1569	-0.126044312	-0.242722208	-0.116677896	0.476939126	0.99984053	FALSE
1646	PF3D7_1119900.iso1.exon1.amp1_3728	-0.133268082	-0.151795823	-0.01852774	0.918396815	0.99984053	FALSE
1647	PF3D7_1120300.2o2_8189	-0.114359576	-0.147487422	-0.033127847	0.847466141	0.99984053	FALSE
1648	PF3D7_1120400.iso1.exon2.amp1_1793	-0.322899456	-0.186700264	0.136199192	0.536214781	0.99984053	FALSE
1649	PF3D7_1120700.iso1.exon1.amp2_3653	0.180904007	-0.142069616	-0.322973623	0.292746763	0.99984053	FALSE
1650	PF3D7_1120800.iso1.exon1.amp1_4126	-0.13206674	-0.11558968	0.016477059	0.899312501	0.99984053	FALSE
1651	PF3D7_1121200.iso1.exon1.amp1_653	-0.229140148	-0.16602882	0.063111328	0.737681872	0.99984053	FALSE
1652	PF3D7_1121600.iso1.exon2.amp1_2679	-0.299148396	-0.09348675	0.205661646	0.449402636	0.99984053	FALSE
1653	PF3D7_1121700.e1s1_5657	0.082614409	-0.057887601	-0.140502011	0.243364925	0.99984053	FALSE
1654	PF3D7_1121800.s1_7974	-0.213583817	-0.130481852	0.083101965	0.452772291	0.99984053	FALSE
1655	PF3D7_1122000.iso1.exon1.amp1_4471	-0.120510328	-0.182941658	-0.06243133	0.527366889	0.99984053	FALSE
1656	PF3D7_1122500.iso1.exon1.amp1_3721	-0.050071933	-0.094087453	-0.04401552	0.651155062	0.99984053	FALSE
1657	PF3D7_1122500.iso1.exon1.amp2_4229	-0.067821338	-0.146555806	-0.078734467	0.447491134	0.99984053	FALSE
1658	PF3D7_1122600.2o2_5848	-0.199988321	-0.205240643	-0.005252322	0.977924513	0.99984053	FALSE
1659	PF3D7_1122800.e1s1_6545	-0.195724569	-0.102287331	0.093437238	0.557235422	0.99984053	FALSE
1660	PF3D7_1122900.e1s1_9126	-0.069127774	-0.148821032	-0.079693258	0.673347668	0.99984053	FALSE
1661	PF3D7_1122900.e2s2_7971	-0.348555855	-0.259789645	0.08876621	0.779239711	0.99984053	FALSE
1662	PF3D7_1122900.e2s3_6815	-0.058159855	-0.194028635	-0.13586878	0.485004655	0.99984053	FALSE
1663	PF3D7_1122900.e2s5_7132	-0.102342958	-0.068245056	0.034097902	0.805780273	0.99984053	FALSE
1664	PF3D7_1123000.iso1.exon1.amp3_1921	-0.1076903	-0.038262884	0.069427416	0.709439536	0.99984053	FALSE
1665	PF3D7_1123200.iso1.exon1.amp1_3335	-0.012666855	0.034062607	0.046729462	0.791640351	0.99984053	FALSE
1666	PF3D7_1123400.e1_5091	-0.329562887	-0.211150533	0.118412354	0.628661719	0.99984053	FALSE
1667	PF3D7_1123500.iso1.exon1.amp1_4580	-0.1962062	-0.243880027	-0.047673827	0.885405893	0.99984053	FALSE
1668	PF3D7_1124000.1o5_7896	-0.227376631	-0.122002941	0.10537369	0.659711842	0.99984053	FALSE
1669	PF3D7_1124000.2o5_7607	-0.205550463	-0.101714114	0.10383635	0.696529715	0.99984053	FALSE
1670	PF3D7_1124100.iso1.exon1.amp1_1988	-0.069482553	-0.104107642	-0.034625089	0.848197874	0.99984053	FALSE
1671	PF3D7_1124300.1o3_7324	-0.136315569	-0.248051046	-0.111735477	0.582620798	0.99984053	FALSE
1672	PF3D7_1124400.iso1.exon1.amp1_1806	-0.158732492	-0.076490562	0.082241931	0.648646393	0.99984053	FALSE
1673	PF3D7_1124500.1o1_7615	-0.131222461	-0.010909313	0.120313147	0.370739204	0.99984053	FALSE
1674	PF3D7_1124600.e1s1_5168	-0.225002085	-0.251695381	-0.026693296	0.926804646	0.99984053	FALSE
1675	PF3D7_1124700.e1s1_6312	-0.230001367	-0.047825573	0.182175794	0.239187572	0.99984053	FALSE
1676	PF3D7_1125300.iso1.exon1.amp1_2856	0.008543601	-0.048329602	-0.056873203	0.638105361	0.99984053	FALSE
1677	PF3D7_1125300.iso1.exon1.amp2_3352	-0.055105086	-0.030346	0.024759085	0.765612264	0.99984053	FALSE
1678	PF3D7_1125400.2o2_5277	-0.182449998	-0.048350915	0.134099083	0.436870167	0.99984053	FALSE
1679	PF3D7_1125700.6o6_7634	-0.145978721	-0.077430937	0.068547784	0.634399297	0.99984053	FALSE
1680	PF3D7_1125800.1o4_6747	-0.140684254	-0.27367685	-0.132992596	0.496294451	0.99984053	FALSE
1681	PF3D7_1125800.3o4_6458	-0.301625566	-0.043211952	0.258413614	0.343690253	0.99984053	FALSE
1682	PF3D7_1126000.e1s2_8344	-0.203984873	-0.122271886	0.081712987	0.70797512	0.99984053	FALSE
1683	PF3D7_1126100.iso1.exon2.amp2_220	-0.136655446	-0.163253099	-0.026597653	0.86848712	0.99984053	FALSE
1684	PF3D7_1126300.e2_7985	-0.002863991	-0.057202521	-0.054338529	0.7141842	0.99984053	FALSE
1685	PF3D7_1126400.2o3_5535	-0.096729085	-0.12850273	-0.031773646	0.811674832	0.99984053	FALSE
1686	PF3D7_1126500.iso1.exon1.amp1_2267	-0.119550094	-0.161726667	-0.042176573	0.755813744	0.99984053	FALSE
1687	PF3D7_1127000.e6s1_6000	-0.243929817	-0.051005652	0.192924165	0.317954386	0.99984053	FALSE
1688	PF3D7_1127300.1o1_7293	-0.05927914	-0.04707905	0.01220009	0.912744198	0.99984053	FALSE
1689	PF3D7_1127400.iso1.exon1.amp1_2346	-0.305940494	-0.049015523	0.25692497	0.330575707	0.99984053	FALSE
1690	PF3D7_1127400.iso1.exon2.amp1_2078	-0.135798214	-0.03393744	0.101860775	0.444935773	0.99984053	FALSE
1691	PF3D7_1127600.iso1.exon2.amp1_349	-0.041614994	-0.081837839	-0.040222845	0.748039467	0.99984053	FALSE
1692	PF3D7_1127700.1o3_4715	-0.091994467	-0.108377485	-0.016383019	0.885983896	0.99984053	FALSE
1693	PF3D7_1127900.3o3_6444	-0.299795656	-0.108813406	0.19098225	0.509042056	0.99984053	FALSE
1694	PF3D7_1128100.2o3_7845	-0.142335797	-0.107301112	0.035034684	0.83144061	0.99984053	FALSE
1695	PF3D7_1128300.e1s1_8069	0.015578778	-0.032602963	-0.048181741	0.652297404	0.99984053	FALSE
1696	PF3D7_1128300.e3s1_8903	-0.106914006	-0.116513447	-0.009599442	0.898189745	0.99984053	FALSE
1697	PF3D7_1128500.1o1_8799	-0.113509024	-0.250061753	-0.136552729	0.610457285	0.99984053	FALSE
1698	PF3D7_1129000.e1s1_6583	-0.232536333	-0.124827462	0.107708872	0.638748665	0.99984053	FALSE
1699	PF3D7_1129100.e1s1_6319	-0.44218812	-0.188410061	0.25377806	0.438003376	0.99984053	FALSE
1700	PF3D7_1129200.2o4_7594	-0.310948398	-0.16483897	0.146109428	0.678341364	0.99984053	FALSE
1701	PF3D7_1129500.iso1.exon1.amp1_4492	-0.047724952	-0.244588623	-0.196863671	0.306426138	0.99984053	FALSE
1702	PF3D7_1129600.e1s1_8953	-0.092485344	-0.142199048	-0.049713704	0.759550093	0.99984053	FALSE
1703	PF3D7_1129700.iso1.exon1.amp1_1271	-0.08936732	-0.046019255	0.043348065	0.688100527	0.99984053	FALSE
1704	PF3D7_1129800.1o1_9026	-0.147767031	-0.095575872	0.05219116	0.843090449	0.99984053	FALSE
1705	PF3D7_1130200_5980	-0.012850514	-0.035362301	-0.022511787	0.863203673	0.99984053	FALSE
1706	PF3D7_1130400_8004	-0.199342685	-0.088566702	0.110775983	0.51802623	0.99984053	FALSE
1707	PF3D7_1131200.iso1.exon1.amp1_62	-0.183784356	-0.054241271	0.129543084	0.422323266	0.99984053	FALSE
1708	PF3D7_1131200.iso1.exon6.amp1_345	-0.21677058	-0.055658109	0.161112471	0.239535517	0.99984053	FALSE
1709	PF3D7_1131600.s2_8288	-0.02824325	-0.07792988	-0.04968663	0.714790811	0.99984053	FALSE
1710	PF3D7_1131800.iso1.exon1.amp1_838	0.044249842	-0.075659309	-0.119909151	0.124593184	0.99984053	FALSE
1711	PF3D7_1132300.1o1_5547	-0.239634086	-0.063047544	0.176586542	0.509520816	0.99984053	FALSE
1712	PF3D7_1132900.1o1_6392	-0.080014015	-0.071560973	0.008453042	0.945977534	0.99984053	FALSE
1713	PF3D7_1133200.e1s2_5075	-0.241659842	-0.210806691	0.030853152	0.867021586	0.99984053	FALSE
1714	PF3D7_1133400_6235	-0.323834289	0.286014511	0.609848801	0.016802507	0.99984053	FALSE
1715	PF3D7_1133500.iso1.exon1.amp1_1264	-0.116839878	-0.044242624	0.072597254	0.624633821	0.99984053	FALSE
1716	PF3D7_1133500.iso1.exon2.amp1_4149	-0.049041574	-0.048104073	0.000937502	0.994220602	0.99984053	FALSE
1717	PF3D7_1133700.iso1.exon1.amp1_970	-0.327472748	-0.205011414	0.122461334	0.719346651	0.99984053	FALSE
1718	PF3D7_1133800.iso1.exon1.amp1_1320	-0.065399231	0.024085593	0.089484824	0.653645852	0.99984053	FALSE
1719	PF3D7_1133900.iso1.exon2.amp2_3355	0.050565149	-0.117429829	-0.167994978	0.42729682	0.99984053	FALSE
1720	PF3D7_1134000.e1s1_6336	-0.359837904	-0.134185674	0.22565223	0.270587522	0.99984053	FALSE
1721	PF3D7_1134200.s1_7422	-0.103703325	-0.095900391	0.007802934	0.957887601	0.99984053	FALSE
1722	PF3D7_1134300.iso1.exon1.amp1_4294	-0.162498008	-0.097288073	0.065209935	0.557001785	0.99984053	FALSE
1723	PF3D7_1134300.iso1.exon1.amp2_4583	-0.117753935	-0.135092044	-0.017338109	0.864916586	0.99984053	FALSE
1724	PF3D7_1134300.iso1.exon1.amp3_4228	-0.056312602	-0.074003832	-0.017691229	0.849443241	0.99984053	FALSE
1725	PF3D7_1134500.s1_5988	-0.057759909	-0.063953752	-0.006193843	0.928998599	0.99984053	FALSE
1726	PF3D7_1134500.s2_6572	-0.066123615	-0.095244891	-0.029121277	0.847098707	0.99984053	FALSE
1727	PF3D7_1134700.e1_5101	-0.199292857	-0.100459045	0.098833813	0.595574408	0.99984053	FALSE
1728	PF3D7_1134700.e2s1_6257	-0.276273568	-0.153650117	0.12262345	0.610055618	0.99984053	FALSE
1729	PF3D7_1134700.e2s2_6835	-0.124960406	-0.102162421	0.022797985	0.896297977	0.99984053	FALSE
1730	PF3D7_1135100.1o1_6774	-0.175295904	-0.116404522	0.058891382	0.823683079	0.99984053	FALSE
1731	PF3D7_1135400.e1s1_5738	-0.234589796	-0.20737843	0.027211366	0.919924478	0.99984053	FALSE
1732	PF3D7_1136100.1o1_5019	-0.065590528	-0.139480691	-0.073890163	0.550782271	0.99984053	FALSE
1733	PF3D7_1136200.1o5_8797	-0.041504859	-0.246591189	-0.20508633	0.217822317	0.99984053	FALSE
1734	PF3D7_1136200.5o5_9080	-0.151944937	-0.229566727	-0.077621789	0.690429516	0.99984053	FALSE
1735	PF3D7_1136300.e2s1_5389	-0.091807474	0.041349454	0.133156929	0.381198242	0.99984053	FALSE
1736	PF3D7_1136500.1.e4s1_8282	-0.300290621	-0.120948029	0.179342592	0.557844399	0.99984053	FALSE
1737	PF3D7_1136600.iso1.exon1.amp1_4586	-0.040108218	-0.072989416	-0.032881198	0.733487314	0.99984053	FALSE
1738	PF3D7_1136700.iso1.exon7.amp1_117	-0.008939876	-0.009695924	-0.000756048	0.991105841	0.99984053	FALSE
1739	PF3D7_1136900.e1s1_7134	-0.085341452	-0.285041797	-0.199700345	0.341770845	0.99984053	FALSE
1740	PF3D7_1136900.e2s1_4885	-0.069425031	0.070163867	0.139588897	0.086787539	0.99984053	FALSE
1741	PF3D7_1137100_7714	-0.120526804	-0.111500849	0.009025955	0.957130774	0.99984053	FALSE
1742	PF3D7_1137300.1o1_6196	-0.207947687	-0.129254093	0.078693594	0.745029953	0.99984053	FALSE
1743	PF3D7_1137600 (renamed)_7629	-0.152367734	-0.214880576	-0.062512842	0.76544126	0.99984053	FALSE
1744	PF3D7_1137600.1o2_7251	-0.191112001	-0.05021592	0.140896081	0.416894152	0.99984053	FALSE
1745	PF3D7_1137900.1o2_5315	-0.052664747	-0.025814636	0.02685011	0.798860753	0.99984053	FALSE
1746	PF3D7_1137900.2o2_4737	-0.044999039	-0.094780839	-0.0497818	0.510547747	0.99984053	FALSE
1747	PF3D7_1138000.iso1.exon1.amp3_4227	-0.00141643	-0.112238415	-0.110821986	0.517655698	0.99984053	FALSE
1748	PF3D7_1138100.1o1_8413	-0.061280957	-0.113725805	-0.052444849	0.77707694	0.99984053	FALSE
1749	PF3D7_1138400.e1s2_7418	-0.173556254	-0.11219528	0.061360974	0.734791172	0.99984053	FALSE
1750	PF3D7_1138400.e1s3_5106	-0.126368693	-0.041868122	0.084500571	0.645613296	0.99984053	FALSE
1751	PF3D7_1138400.e1s4_8575	-0.207623752	-0.014937927	0.192685824	0.345974461	0.99984053	FALSE
1752	PF3D7_1138400.e1s5_8576	-0.233920753	-0.185279959	0.048640794	0.829083345	0.99984053	FALSE
1753	PF3D7_1138800.3o7_5545	-0.129457913	-0.117651399	0.011806514	0.958313659	0.99984053	FALSE
1754	PF3D7_1139100.iso1.exon1.amp2_3640	0.007132473	-0.1621041	-0.169236573	0.213243603	0.99984053	FALSE
1755	PF3D7_1139200.iso1.exon2.amp1_3587	-0.166278684	-0.091103844	0.07517484	0.669277471	0.99984053	FALSE
1756	PF3D7_1139300.e2s1_8655	-0.039069973	-0.220012367	-0.180942394	0.252025536	0.99984053	FALSE
1757	PF3D7_1139300.e2s3_8649	-0.185420342	-0.316812467	-0.131392125	0.635815392	0.99984053	FALSE
1758	PF3D7_1139500.1.e1s1_5751	-0.114539058	-0.079986572	0.034552486	0.807528826	0.99984053	FALSE
1759	PF3D7_1140000.2o2_8125	-0.30073398	-0.278647337	0.022086644	0.953176962	0.99984053	FALSE
1760	PF3D7_1140100 (renamed)_5564	-0.092737679	-0.300718849	-0.20798117	0.35118348	0.99984053	FALSE
1761	PF3D7_1140500.e1s1_7204	-0.114451745	0.053453641	0.167905386	0.236538889	0.99984053	FALSE
1762	PF3D7_1140900.3o6_8819	-0.290637041	-0.178191971	0.11244507	0.695543299	0.99984053	FALSE
1763	PF3D7_1140900.5o6_9108	-0.211700085	-0.125300786	0.086399299	0.62032809	0.99984053	FALSE
1764	PF3D7_1141200.iso1.exon1.amp1_2920	-0.186322137	-0.06475502	0.121567117	0.491221499	0.99984053	FALSE
1765	PF3D7_1141400.5o5_5552	-0.143695227	-0.060845088	0.08285014	0.680356855	0.99984053	FALSE
1766	PF3D7_1141900.1o1_6461	-0.101363636	-0.027624511	0.073739125	0.468984917	0.99984053	FALSE
1767	PF3D7_1142800_7136	-0.096643272	-0.073642058	0.023001215	0.852032935	0.99984053	FALSE
1768	PF3D7_1142900.e2_6836	-0.09857208	-0.044367197	0.054204883	0.727125722	0.99984053	FALSE
1769	PF3D7_1143000.iso1.exon1.amp1_3893	-0.194925536	-0.02993783	0.164987706	0.296476294	0.99984053	FALSE
1770	PF3D7_1143100.iso1.exon1.amp2_1039	-0.142132455	-0.012442355	0.1296901	0.114059116	0.99984053	FALSE
1771	PF3D7_1143300.1o1_4684	-0.157588563	-0.093323035	0.064265529	0.711245909	0.99984053	FALSE
1772	PF3D7_1143900.iso1.exon2.amp1_1547	-0.406525656	-0.19825085	0.208274806	0.448712983	0.99984053	FALSE
1773	PF3D7_1144200.iso1.exon2.amp1_2141	-0.171326001	-0.086727732	0.084598269	0.269714201	0.99984053	FALSE
1774	PF3D7_1144500.1o1_6422	-0.149035949	-0.114289986	0.034745962	0.831657719	0.99984053	FALSE
1775	PF3D7_1144600.iso1.exon1.amp1_3019	-0.029349606	-0.062306882	-0.032957276	0.833183893	0.99984053	FALSE
1776	PF3D7_1145200.iso1.exon1.amp1_1399	-0.092202272	-0.076688792	0.015513481	0.899233163	0.99984053	FALSE
1777	PF3D7_1145200.iso1.exon1.amp3_2211	-0.149171839	-0.009476029	0.139695811	0.032650515	0.99984053	FALSE
1778	PF3D7_1145400.e1s1_8368	-0.122957721	-0.099317826	0.023639895	0.889452155	0.99984053	FALSE
1779	PF3D7_1145500.2o2_8228	-0.155499179	-0.036773402	0.118725777	0.419185665	0.99984053	FALSE
1780	PF3D7_1145900.iso1.exon2.amp1_376	-0.17307826	-0.073529829	0.099548431	0.246685311	0.99984053	FALSE
1781	PF3D7_1146000.1o1_8205	-0.164554562	-0.198434933	-0.033880371	0.849151357	0.99984053	FALSE
1782	PF3D7_1146500.1o1_8151	-0.216010963	-0.212430331	0.003580632	0.98730086	0.99984053	FALSE
1783	PF3D7_1146700.iso1.exon1.amp1_3331	-0.069158208	-0.057094421	0.012063787	0.912323553	0.99984053	FALSE
1784	PF3D7_1146800.e3s1_4831	-0.138556396	-0.242004314	-0.103447918	0.658444411	0.99984053	FALSE
1785	PF3D7_1147200.iso1.exon1.amp3_4233	-0.080404619	-0.062139207	0.018265411	0.916453174	0.99984053	FALSE
1786	PF3D7_1147800.1.e2s1_5119	-0.16736126	-0.090040389	0.07732087	0.662625298	0.99984053	FALSE
1787	PF3D7_1147800.iso2.exon1.amp1_325	-0.168961162	-0.163148516	0.005812645	0.975488855	0.99984053	FALSE
1788	PF3D7_1148900.iso1.exon1.amp1_1825	-0.242151651	-0.062624329	0.179527322	0.320991154	0.99984053	FALSE
1789	PF3D7_1149000.e1s1_5748	-0.049977187	-0.234086072	-0.184108885	0.157726274	0.99984053	FALSE
1790	PF3D7_1149000.s4 (renamed)_8579	-0.328693089	0.034540684	0.363233773	0.190421908	0.99984053	FALSE
1791	PF3D7_1149000.s6 (renamed)_7423	-0.237469046	0.042631347	0.280100393	0.142025071	0.99984053	FALSE
1792	PF3D7_1149100.iso2.exon1.amp1_4097	-0.007926507	-0.055570459	-0.047643952	0.805229335	0.99984053	FALSE
1793	PF3D7_1149100.iso2.exon2.amp1_3610	-0.094358552	-0.025744884	0.068613668	0.480256201	0.99984053	FALSE
1794	PF3D7_1149200.e2s1_6829	-0.142478837	-0.00972692	0.132751917	0.344985182	0.99984053	FALSE
1795	PF3D7_1149200.e2s2_6546	-0.158565558	-0.064283503	0.094282055	0.591673562	0.99984053	FALSE
1796	PF3D7_1149500.3o4_7655	-0.108056334	-0.160273932	-0.052217598	0.654593682	0.99984053	FALSE
1797	PF3D7_1149500.e2_6825	-0.114952589	-0.087189178	0.027763411	0.755447722	0.99984053	FALSE
1798	PF3D7_1149900.iso1.exon2.amp1_4166	-0.274392439	-0.293558021	-0.019165582	0.948482233	0.99984053	FALSE
1799	PF3D7_1150000.iso1.exon2.amp1_3314	-0.353671917	-0.20478142	0.148890498	0.507826275	0.99984053	FALSE
1800	PF3D7_1150200.iso1.exon1.amp1_412	-0.204673107	-0.226110442	-0.021437335	0.88882262	0.99984053	FALSE
1801	PF3D7_1150300.iso1.exon1.amp1_2740	-0.071957385	-0.219119767	-0.147162382	0.425650219	0.99984053	FALSE
1802	PF3D7_1150400.iso1.exon2.amp1_714	-0.134500621	-0.07853471	0.05596591	0.874036187	0.99984053	FALSE
1803	PF3D7_1200100.iso1.exon1.amp2_794	-0.285780332	-0.237299268	0.048481064	0.81291436	0.99984053	FALSE
1804	PF3D7_1200200.iso1.exon1.amp1_2148	-0.341914868	-0.193625924	0.148288943	0.511825375	0.99984053	FALSE
1805	PF3D7_1200300.e2s1_7189	-0.257848937	-0.147484462	0.110364474	0.534188887	0.99984053	FALSE
1806	PF3D7_1200400.iso1.exon1.amp2_776	-0.090050239	-0.058279487	0.031770752	0.583435352	0.99984053	FALSE
1807	PF3D7_1200400.iso1.exon2.amp1_720	-0.1232609	-0.28485871	-0.16159781	0.424493024	0.99984053	FALSE
1808	PF3D7_1200500.iso1.exon1.amp1_2436	-0.219260477	-0.141752399	0.077508078	0.641116224	0.99984053	FALSE
1809	PF3D7_1200600.iso1.exon2.amp3_2805	0.095797921	-0.275082427	-0.370880348	0.092953537	0.99984053	FALSE
1810	PF3D7_1200800.iso1.exon2.amp1_4209	-0.121917184	-0.042438091	0.079479094	0.325630804	0.99984053	FALSE
1811	PF3D7_1201200.2o2_4660	-0.001864704	-0.060841079	-0.058976375	0.757074825	0.99984053	FALSE
1812	PF3D7_1201300.1o1_7539	-0.051485201	-0.067890047	-0.016404846	0.920431441	0.99984053	FALSE
1813	PF3D7_1201300_8869	-0.082067587	-0.075333871	0.006733716	0.960083904	0.99984053	FALSE
1814	PF3D7_1201400.iso1.exon1.amp1_218	-0.21768544	-0.156108247	0.061577193	0.698270801	0.99984053	FALSE
1815	PF3D7_1201400.iso1.exon1.amp2_2193	-0.142072359	-0.185566522	-0.043494164	0.781802283	0.99984053	FALSE
1816	PF3D7_1202200_6847	-0.231625521	-0.080235413	0.151390109	0.595548605	0.99984053	FALSE
1817	PF3D7_1202300.e14s1_9188	-0.276080234	-0.108489801	0.167590433	0.552998491	0.99984053	FALSE
1818	PF3D7_1202300.e31s1_7502	-0.259073497	-0.213504645	0.045568852	0.888051273	0.99984053	FALSE
1819	PF3D7_1202300.e33s1_5173	-0.072990787	-0.03261215	0.040378636	0.768896664	0.99984053	FALSE
1820	PF3D7_1202300.e34s1_6594	-0.093430761	-0.071666504	0.021764257	0.875170515	0.99984053	FALSE
1821	PF3D7_1202600.e1_8857	-0.105185995	-0.041250681	0.063935314	0.719379253	0.99984053	FALSE
1822	PF3D7_1203700.e3_8270	-0.096401648	-0.084483476	0.011918172	0.943556163	0.99984053	FALSE
1823	PF3D7_1203900 (renamed)_7587	-0.172170467	-0.147111482	0.025058985	0.92370851	0.99984053	FALSE
1824	PF3D7_1204300_6840	-0.190933176	-0.078820439	0.112112737	0.613580318	0.99984053	FALSE
1825	PF3D7_1205100.iso1.exon1.amp1_152	-0.145514461	-0.086978006	0.058536455	0.62215539	0.99984053	FALSE
1826	PF3D7_1205400.iso1.exon1.amp2_488	-0.052303333	-0.145750146	-0.093446813	0.393690039	0.99984053	FALSE
1827	PF3D7_1205500.e1s1_6267	-0.18598551	-0.164248572	0.021736938	0.892485887	0.99984053	FALSE
1828	PF3D7_1205500.e1s2_5111	-0.225272178	-0.277227893	-0.051955715	0.860725864	0.99984053	FALSE
1829	PF3D7_1205800.3o4_5646	0.020809529	-0.00052114	-0.021330669	0.863987607	0.99984053	FALSE
1830	PF3D7_1206000.1o1_7583	-0.23299348	-0.135382697	0.097610783	0.691479921	0.99984053	FALSE
1831	PF3D7_1206100.e2s1_6587	-0.01681036	-0.039322873	-0.022512514	0.744592689	0.99984053	FALSE
1832	PF3D7_1206600.iso1.exon1.amp1_261	-0.09701179	-0.00812443	0.088887359	0.312303161	0.99984053	FALSE
1833	PF3D7_1206900 (renamed, has duplicates)_7621	-0.049272144	-0.070361307	-0.021089164	0.853559533	0.99984053	FALSE
1834	PF3D7_1206900.4o4_7049	-0.200902967	0.001758772	0.202661739	0.225156025	0.99984053	FALSE
1835	PF3D7_1207000.e3s1_7223	-0.103870697	-0.008506516	0.095364181	0.550963795	0.99984053	FALSE
1836	PF3D7_1207200.iso1.exon1.amp3_2782	0.145987421	0.016116659	-0.129870763	0.380156845	0.99984053	FALSE
1837	PF3D7_1207400.2o2_8755	-0.1754008	-0.086539381	0.08886142	0.572140325	0.99984053	FALSE
1838	PF3D7_1207500.e3s1_6870	-0.186853124	-0.125820898	0.061032226	0.769643833	0.99984053	FALSE
1839	PF3D7_1207600.1o1_4730	-0.061908523	0.034454908	0.096363431	0.432129177	0.99984053	FALSE
1840	PF3D7_1208000.iso1.exon1.amp1_342	-0.152274802	-0.11595282	0.036321982	0.81125364	0.99984053	FALSE
1841	PF3D7_1208100 (renamed, has duplicates)_7883	0.018729237	-0.035729301	-0.054458538	0.612692107	0.99984053	FALSE
1842	PF3D7_1208100.e2s1_5771	-0.036470335	-0.054181369	-0.017711034	0.881353833	0.99984053	FALSE
1843	PF3D7_1208100.e2s2_5482	-0.127811288	0.110248718	0.238060006	0.276405436	0.99984053	FALSE
1844	PF3D7_1208500.iso1.exon1.amp2_seg1_1423	-0.102504659	-0.038640021	0.063864638	0.450885514	0.99984053	FALSE
1845	PF3D7_1208800.e1s1_6623	-0.132605774	-0.265089372	-0.132483598	0.61319473	0.99984053	FALSE
1846	PF3D7_1208900.s1_5377	-0.047223458	-0.089011013	-0.041787555	0.73010304	0.99984053	FALSE
1847	PF3D7_1209400.e1s1_8090	-0.113590137	-0.126203063	-0.012612925	0.933990297	0.99984053	FALSE
1848	PF3D7_1209500.1.3o3_5905	-0.133599536	-0.081768982	0.051830554	0.729966936	0.99984053	FALSE
1849	PF3D7_1209500.iso2.exon2.amp1_3320	-0.182172014	-0.02495331	0.157218705	0.24639269	0.99984053	FALSE
1850	PF3D7_1209900.1o1_8507	-0.094023477	-0.106611487	-0.01258801	0.921764522	0.99984053	FALSE
1851	PF3D7_1210100.1o1_7277	-0.192372485	-0.15731998	0.035052505	0.85026785	0.99984053	FALSE
1852	PF3D7_1210600.iso1.exon1.amp1_4021	-0.096825929	-0.321540609	-0.224714681	0.336285837	0.99984053	FALSE
1853	PF3D7_1210600.iso1.exon1.amp2_4535	-0.076932024	-0.252435563	-0.175503539	0.330259648	0.99984053	FALSE
1854	PF3D7_1211000.e3s1_5406	-0.162333356	-0.181236931	-0.018903575	0.928452987	0.99984053	FALSE
1855	PF3D7_1211000.e3s2_8300	-0.220759449	0.075495825	0.296255274	0.248919237	0.99984053	FALSE
1856	PF3D7_1211300.e2s1_4865	0.046099928	-0.011371125	-0.057471053	0.617567996	0.99984053	FALSE
1857	PF3D7_1211600.iso1.exon1.amp2_2832	-0.041247377	-0.161121157	-0.11987378	0.316439052	0.99984053	FALSE
1858	PF3D7_1211900.e1s1_5489	-0.13878658	-0.122849244	0.015937336	0.939884787	0.99984053	FALSE
1859	PF3D7_1211900.e2s1_8064	-0.240403087	-0.157148503	0.083254583	0.608911587	0.99984053	FALSE
1860	PF3D7_1212000 (renamed)_7876	-0.139376659	-0.150970872	-0.011594213	0.92957706	0.99984053	FALSE
1861	PF3D7_1212000.e2s1_5966	-0.164755628	-0.065535241	0.099220387	0.497381174	0.99984053	FALSE
1862	PF3D7_1212400.1o1_5266	-0.16021331	-0.015423963	0.144789347	0.325385673	0.99984053	FALSE
1863	PF3D7_1212500.1o1_4735	-0.149941302	-0.13030596	0.019635343	0.921816993	0.99984053	FALSE
1864	PF3D7_1212700.s1_9130	-0.195555711	-0.187326973	0.008228738	0.967996649	0.99984053	FALSE
1865	PF3D7_1212800_6558	-0.146664198	-0.094920918	0.05174328	0.7854	0.99984053	FALSE
1866	PF3D7_1212900.e1s1_8355	0.00328218	-0.115837748	-0.119119928	0.586776283	0.99984053	FALSE
1867	PF3D7_1213400.e1s1_8061	-0.014846711	-0.082640359	-0.067793648	0.595771054	0.99984053	FALSE
1868	PF3D7_1213500.1o2_5618	-0.178387114	-0.166146002	0.012241112	0.964326227	0.99984053	FALSE
1869	PF3D7_1214000.iso1.exon2.amp1_2096	-0.211315719	-0.053880858	0.157434861	0.30105834	0.99984053	FALSE
1870	PF3D7_1215100.e1s1_8868	-0.15899894	-0.167943103	-0.008944163	0.969913495	0.99984053	FALSE
1871	PF3D7_1215200.iso1.exon1.amp1_1558	-0.264924979	-0.112429573	0.152495406	0.35280024	0.99984053	FALSE
1872	PF3D7_1215400.1o1_8489	-0.169789371	-0.170827866	-0.001038495	0.995812822	0.99984053	FALSE
1873	PF3D7_1215900.1o1_5893	-0.151722098	-0.0963293	0.055392798	0.798561073	0.99984053	FALSE
1874	PF3D7_1216300.iso1.exon1.amp1_2121	-0.189759701	-0.059119641	0.13064006	0.518162038	0.99984053	FALSE
1875	PF3D7_1216500.e1s1_7177	0.023850772	-0.028069182	-0.051919954	0.60313522	0.99984053	FALSE
1876	PF3D7_1216600_6846	-0.292504051	-0.1226608	0.169843251	0.640261878	0.99984053	FALSE
1877	PF3D7_1216900.e1s1_6556	-0.082872721	0.004191272	0.087063993	0.572032605	0.99984053	FALSE
1878	PF3D7_1217900.3o3_5875	-0.122519521	-0.054122157	0.068397364	0.258143183	0.99984053	FALSE
1879	PF3D7_1218200.e1s2_6823	-0.112097139	-0.088841545	0.023255593	0.875292264	0.99984053	FALSE
1880	PF3D7_1218500.e3s1_4808	-0.169827717	-0.065077782	0.104749935	0.543332333	0.99984053	FALSE
1881	PF3D7_1218600.e2s1_6329	-0.129100721	-0.178708499	-0.049607778	0.685163655	0.99984053	FALSE
1882	PF3D7_1219000.iso1.exon1.amp1_seg1_4603	-0.080698471	-0.089461366	-0.008762896	0.951401483	0.99984053	FALSE
1883	PF3D7_1219100.e1s1_9152	-0.192691335	-0.222765379	-0.030074044	0.928546843	0.99984053	FALSE
1884	PF3D7_1219100.e1s2_9153	-0.172769967	-0.157080817	0.01568915	0.935955986	0.99984053	FALSE
1885	PF3D7_1219300.iso1.exon1.amp1_4486	-0.065299112	-0.160731549	-0.095432437	0.479910168	0.99984053	FALSE
1886	PF3D7_1219600.iso1.exon3.amp1_2541	-0.109988696	-0.088898154	0.021090543	0.895332811	0.99984053	FALSE
1887	PF3D7_1219600.iso1.exon3.amp2_2830	-0.025424773	-0.070568949	-0.045144176	0.782196465	0.99984053	FALSE
1888	PF3D7_1219700.e1s1_6308	-0.416516135	-0.171234699	0.245281436	0.294031307	0.99984053	FALSE
1889	PF3D7_1219800.iso1.exon1.amp1_616	-0.238712326	-0.228076104	0.010636222	0.966719954	0.99984053	FALSE
1890	PF3D7_1219900.1o1_5820	-0.269736693	-0.109802715	0.159933978	0.529409069	0.99984053	FALSE
1891	PF3D7_1220100.1o1_7044	-0.120114581	-0.004492233	0.115622349	0.293829601	0.99984053	FALSE
1892	PF3D7_1220300.iso1.exon1.amp1_2695	-0.186514591	-0.073093238	0.113421353	0.328648097	0.99984053	FALSE
1893	PF3D7_1220600.2o4_7295	-0.143826718	0.059911667	0.203738385	0.203057107	0.99984053	FALSE
1894	PF3D7_1221000.e1s1_8662	-0.179829105	-0.096889057	0.082940048	0.23587645	0.99984053	FALSE
1895	PF3D7_1221000.e1s3_4910	-0.036727054	-0.390051528	-0.353324474	0.132973301	0.99984053	FALSE
1896	PF3D7_1221300.iso1.exon6.amp1_1262	-0.136169907	0.063156114	0.199326021	0.211391681	0.99984053	FALSE
1897	PF3D7_1221400.e1s1_6610	-0.175400979	-0.024464563	0.150936416	0.097597454	0.99984053	FALSE
1898	PF3D7_1221500.1o1_6483	-0.257580313	-0.131936845	0.125643468	0.689032323	0.99984053	FALSE
1899	PF3D7_1221600.1o1_4708	-0.188760533	-0.21323643	-0.024475897	0.935476824	0.99984053	FALSE
1900	PF3D7_1221900.1o1_9091	-0.070633732	-0.133786884	-0.063153152	0.68787149	0.99984053	FALSE
1901	PF3D7_1222300.e1s1_9154	-0.128017042	0.113177973	0.241195015	0.070500466	0.99984053	FALSE
1902	PF3D7_1222600 (renamed, has duplicates)_6843	-0.103226747	-0.274312865	-0.171086119	0.442699919	0.99984053	FALSE
1903	PF3D7_1222600.e1s1_5687	-0.138089534	-0.118396178	0.019693356	0.919491301	0.99984053	FALSE
1904	PF3D7_1222700.1o1_8121	-0.039308363	0.119804733	0.159113096	0.326519007	0.99984053	FALSE
1905	PF3D7_1223100.e3s1_6322	-0.235043696	-0.095249269	0.139794427	0.312225113	0.99984053	FALSE
1906	PF3D7_1223600.1o2_8535	-0.244239791	-0.130172821	0.11406697	0.666894029	0.99984053	FALSE
1907	PF3D7_1223600.e1_5670	-0.252601462	-0.1290133	0.123588163	0.685725097	0.99984053	FALSE
1908	PF3D7_1223600.e2s1_8263	-0.1465376	-0.122213264	0.024324335	0.896448734	0.99984053	FALSE
1909	PF3D7_1223700.1o2_5258	-0.05939371	-0.157214582	-0.097820873	0.769424887	0.99984053	FALSE
1910	PF3D7_1223800.iso1.exon1.amp1_short_2872	-0.058833351	-0.152380391	-0.09354704	0.699593008	0.99984053	FALSE
1911	PF3D7_1223900.iso1.exon1.amp1_106	-0.033731266	-0.02597995	0.007751316	0.882027383	0.99984053	FALSE
1912	PF3D7_1224200.1o5_7077	-0.079398902	-0.060272501	0.019126402	0.854283402	0.99984053	FALSE
1913	PF3D7_1224500.2o2_4969	-0.260952974	-0.223281017	0.037671957	0.903297026	0.99984053	FALSE
1914	PF3D7_1225600.e2s1_7774	-0.158864867	-0.047084686	0.111780181	0.377033688	0.99984053	FALSE
1915	PF3D7_1226000.e1_5411	-0.087972328	-0.028597161	0.059375166	0.602379178	0.99984053	FALSE
1916	PF3D7_1226100.1o1_4971	-0.249571924	-0.140623831	0.108948093	0.67834681	0.99984053	FALSE
1917	PF3D7_1226300.e1s1_6601	-0.212908241	-0.074511376	0.138396865	0.481518395	0.99984053	FALSE
1918	PF3D7_1226400.iso1.exon3.amp1_1587	-0.265366296	-0.159906723	0.105459573	0.598366417	0.99984053	FALSE
1919	PF3D7_1226800.2o5_6721	-0.076462431	-0.161356669	-0.084894237	0.620827081	0.99984053	FALSE
1920	PF3D7_1227100.e1s1_4898	-0.083170099	-0.232780825	-0.149610726	0.508714648	0.99984053	FALSE
1921	PF3D7_1227200.iso1.exon1.amp2_815	-0.179782808	-0.149724513	0.030058295	0.868333782	0.99984053	FALSE
1922	PF3D7_1227300.e1s2_8357	-0.081854716	-0.09675743	-0.014902714	0.920976206	0.99984053	FALSE
1923	PF3D7_1227500.2o2_5357	-0.088203597	0.002113809	0.090317406	0.596930671	0.99984053	FALSE
1924	PF3D7_1228100.iso1.exon2.amp1_2994	-0.146500824	-0.108258127	0.038242697	0.849955	0.99984053	FALSE
1925	PF3D7_1228100.iso1.exon3.amp1_2404	-0.14231516	-0.062384978	0.079930182	0.58161867	0.99984053	FALSE
1926	PF3D7_1228300.iso1.exon1.amp1_2480	-0.02058818	0.001454467	0.022042647	0.849567729	0.99984053	FALSE
1927	PF3D7_1228400.s2_4794	-0.201413877	-0.110230398	0.09118348	0.740074486	0.99984053	FALSE
1928	PF3D7_1228600.e1s1_5187	-0.113597224	-0.084639566	0.028957657	0.847435283	0.99984053	FALSE
1929	PF3D7_1228700.iso1.exon1.amp1_seg2_1438	-0.109929034	-0.120821731	-0.010892697	0.914251428	0.99984053	FALSE
1930	PF3D7_1228800.e1s1_8000	-0.243443371	-0.141818696	0.101624676	0.751895143	0.99984053	FALSE
1931	PF3D7_1228800.e1s4_5484	-0.096123415	-0.039909361	0.056214054	0.723173625	0.99984053	FALSE
1932	PF3D7_1229300.1o1_8528	-0.188747477	-0.196355361	-0.007607884	0.969630374	0.99984053	FALSE
1933	PF3D7_1229600.iso1.exon2.amp1_804	-0.060151146	-0.233650737	-0.173499591	0.338646392	0.99984053	FALSE
1934	PF3D7_1229600.iso1.exon2.amp2_1093	-0.036491813	-0.249896471	-0.213404658	0.203233021	0.99984053	FALSE
1935	PF3D7_1230000.iso1.exon10.amp2_1646	-0.107486682	-0.118521464	-0.011034782	0.949295497	0.99984053	FALSE
1936	PF3D7_1230000.iso1.exon2.amp1_2063	-0.102830574	-0.123066027	-0.020235453	0.839783967	0.99984053	FALSE
1937	PF3D7_1230000.iso1.exon6.amp1_333	-0.224306799	-0.215881609	0.00842519	0.979208698	0.99984053	FALSE
1938	PF3D7_1230400.5o5_7268	-0.26672565	-0.070030573	0.196695077	0.432136671	0.99984053	FALSE
1939	PF3D7_1230600.iso1.exon1.amp1_71	-0.115357415	-0.091876562	0.023480853	0.848079016	0.99984053	FALSE
1940	PF3D7_1230700.1o1_6777	-0.228513434	-0.194965997	0.033547438	0.908719003	0.99984053	FALSE
1941	PF3D7_1231000.iso1.exon7.amp1_4124	-0.206551361	-0.24728687	-0.040735508	0.869864465	0.99984053	FALSE
1942	PF3D7_1231400.iso1.exon4.amp1_924	-0.324323847	-0.309147503	0.015176345	0.962124691	0.99984053	FALSE
1943	PF3D7_1231500.1o1_4656	-0.146952705	-0.094449913	0.052502792	0.792424838	0.99984053	FALSE
1944	PF3D7_1231600.iso1.exon1.amp2_1920	-0.197492611	-0.141146938	0.056345673	0.744499129	0.99984053	FALSE
1945	PF3D7_1232000.1o2_6457	-0.054005413	-0.064258491	-0.010253078	0.953458907	0.99984053	FALSE
1946	PF3D7_1232100.e1_8842	-0.116805339	-0.066055748	0.050749591	0.680977737	0.99984053	FALSE
1947	PF3D7_1232100.e2_4807	-0.049113366	-0.062326912	-0.013213546	0.888288105	0.99984053	FALSE
1948	PF3D7_1232600.iso1.exon1.amp1_709	-0.156351427	-0.146346717	0.01000471	0.936543136	0.99984053	FALSE
1949	PF3D7_1232700.iso1.exon1.amp1_3259	-0.282645129	-0.096654921	0.185990208	0.296252084	0.99984053	FALSE
1950	PF3D7_1233200.iso2.exon1.amp1_3096	0.063142499	-0.209425868	-0.272568367	0.211944278	0.99984053	FALSE
1951	PF3D7_1233200.iso2.exon1.amp2_seg2_2883	0.025214544	-0.148692622	-0.173907167	0.264804409	0.99984053	FALSE
1952	PF3D7_1233200.iso2.exon1.amp3_seg1_1729	0.070816418	-0.279002635	-0.349819053	0.112545499	0.99984053	FALSE
1953	PF3D7_1233300.s1_7401	-0.100411168	0.063203007	0.163614176	0.271052752	0.99984053	FALSE
1954	PF3D7_1233300.s2_5950	-0.127663514	-0.120490776	0.007172738	0.956336067	0.99984053	FALSE
1955	PF3D7_1233400.1o4_5291	-0.197268802	-0.091785773	0.105483029	0.611834936	0.99984053	FALSE
1956	PF3D7_1233600.e1s3_8293	-0.063008441	-0.066708948	-0.003700508	0.973445692	0.99984053	FALSE
1957	PF3D7_1233700.iso1.exon1.amp1_1031	-0.172807962	-0.111516126	0.061291836	0.724704723	0.99984053	FALSE
1958	PF3D7_1233800.3o3_4664	-0.138616492	0.010274014	0.148890506	0.327023458	0.99984053	FALSE
1959	PF3D7_1234300.2o2_6755	-0.254348132	-0.138505059	0.115843073	0.609898655	0.99984053	FALSE
1960	PF3D7_1234600.iso1.exon1.amp1_2569	-0.176325274	-0.027862171	0.148463103	0.302911888	0.99984053	FALSE
1961	PF3D7_1234600.iso1.exon1.amp2_3083	-0.123680364	0.030269461	0.153949825	0.190360093	0.99984053	FALSE
1962	PF3D7_1234700.iso1.exon2.amp1_2955	-0.242921752	-0.038594705	0.204327047	0.397966316	0.99984053	FALSE
1963	PF3D7_1234800.e1s1_7490	-0.117262752	-0.095420623	0.021842129	0.874793702	0.99984053	FALSE
1964	PF3D7_1234800.e1s2_8941	-0.060171851	-0.117578011	-0.057406161	0.78674738	0.99984053	FALSE
1965	PF3D7_1235000.iso1.exon2.amp1_3863	-0.22195357	-0.10264248	0.11931109	0.284092689	0.99984053	FALSE
1966	PF3D7_1235000.iso1.exon3.amp1_650	-0.208536552	-0.177085427	0.031451124	0.88350711	0.99984053	FALSE
1967	PF3D7_1235200.iso1.exon2.amp1_3400	-0.169993714	-0.160120979	0.009872735	0.972661454	0.99984053	FALSE
1968	PF3D7_1235200.iso1.exon2.amp2_2539	-0.066716735	-0.171064394	-0.10434766	0.71354482	0.99984053	FALSE
1969	PF3D7_1235400.e1s2_5177	-0.126104658	-0.049149818	0.07695484	0.50199804	0.99984053	FALSE
1970	PF3D7_1235800.iso1.exon4.amp1_2414	-0.151427288	-0.036409156	0.115018131	0.624107616	0.99984053	FALSE
1971	PF3D7_1236000.1o1_6739	-0.026677523	-0.024803316	0.001874207	0.991275328	0.99984053	FALSE
1972	PF3D7_1236100.e2s1_7758	-0.316052837	-0.347807788	-0.031754951	0.923240293	0.99984053	FALSE
1973	PF3D7_1236200.iso1.exon1.amp2_4226	-0.205050511	-0.097114508	0.107936003	0.465742635	0.99984053	FALSE
1974	PF3D7_1236300.1o1_5000	-0.087460221	-0.047393721	0.040066501	0.748418953	0.99984053	FALSE
1975	PF3D7_1236500.1o1_7853	-0.101711592	0.044768057	0.146479649	0.504811913	0.99984053	FALSE
1976	PF3D7_1237300.iso1.exon3.amp1_116	-0.154291613	0.002485478	0.15677709	0.223465856	0.99984053	FALSE
1977	PF3D7_1237400.3o3_5573	-0.096177672	-0.084274267	0.011903404	0.947883122	0.99984053	FALSE
1978	PF3D7_1237400.e3_7403	-0.149735872	-0.092998098	0.056737774	0.690945466	0.99984053	FALSE
1979	PF3D7_1237900.iso1.exon1.amp1_4591	-0.049740803	-0.029276126	0.020464677	0.803044163	0.99984053	FALSE
1980	PF3D7_1238200.iso1.exon1.amp1_3886	-0.138955489	-0.007047497	0.131907992	0.178597038	0.99984053	FALSE
1981	PF3D7_1238400.iso1.exon4.amp1_630	-0.09715566	-0.145244515	-0.048088855	0.710494566	0.99984053	FALSE
1982	PF3D7_1238600.iso1.exon1.amp1_1581	-0.133784179	-0.139682509	-0.00589833	0.975969247	0.99984053	FALSE
1983	PF3D7_1238800.e1s1_6061	-0.22260101	-0.251646552	-0.029045542	0.934177788	0.99984053	FALSE
1984	PF3D7_1239200.e1s2_7139	-0.047656951	-0.118932303	-0.071275352	0.524927244	0.99984053	FALSE
1985	PF3D7_1239400.1o1_5240	-0.074333228	-0.0267679	0.047565328	0.817603412	0.99984053	FALSE
1986	PF3D7_1239600.1o1_9028	-0.228719334	-0.153974711	0.074744623	0.724219903	0.99984053	FALSE
1987	PF3D7_1239700.e1s1_5983	-0.144889723	-0.141860442	0.00302928	0.989712479	0.99984053	FALSE
1988	PF3D7_1239800.s5_6570	-0.157698261	-0.0153162	0.142382061	0.289902987	0.99984053	FALSE
1989	PF3D7_1240000.iso1.exon1.amp1_735	-0.055737757	-0.07844744	-0.022709683	0.886620742	0.99984053	FALSE
1990	PF3D7_1240300.iso1.exon1.amp2_2520	-0.077285289	-0.013288528	0.063996761	0.432593182	0.99984053	FALSE
1991	PF3D7_1240300.iso1.exon2.amp1_4487	-0.114463888	-0.221759455	-0.107295566	0.585663581	0.99984053	FALSE
1992	PF3D7_1240400.iso1.exon2.amp1_1013	-0.17883939	-0.029933017	0.148906373	0.520656403	0.99984053	FALSE
1993	PF3D7_1240600.iso1.exon2.amp1_2168	-0.148454375	-0.10326759	0.045186785	0.788473346	0.99984053	FALSE
1994	PF3D7_1240900.iso1.exon3.amp1_1880	-0.181345919	-0.117866369	0.06347955	0.784853822	0.99984053	FALSE
1995	PF3D7_1240900.iso1.exon4.amp2_3972	-0.5230801	-0.139930311	0.383149789	0.39808823	0.99984053	FALSE
1996	PF3D7_1241300.iso1.exon1.amp1_2759	-0.067301492	-0.081740439	-0.014438947	0.894490827	0.99984053	FALSE
1997	PF3D7_1241400.iso1.exon1.amp2_seg2_276	-0.174524995	-0.2769096	-0.102384605	0.527550598	0.99984053	FALSE
1998	PF3D7_1241700.e2s1_7179	-0.180052998	-0.125998264	0.054054734	0.755465021	0.99984053	FALSE
[truncated: 806 more rows]
