# Supplementary material for: Proteome-wide analysis of a malaria vaccine study reveals personalized humoral immune profiles in Tanzanian adults
Source: eLife. 2020 Jul 14;9:e53080. doi: 10.7554/eLife.53080 (PMC7386907; doi:10.7554/eLife.53080)
Supplement: Figure 4—figure supplement 2—source data 2. [file elife-53080-fig4-figsupp2-data2.csv]

DELTA control versus group 3
	protein_ID	mean_seorpositivy_group1	mean_seorpositivy_group2	log_FC	p_value	adj.p_value	is_threshold_reached
1	MAL13P1.303e4s1_6254	-0.064598047	-0.011253945	0.053344102	0.494774596	0.636327614	FALSE
2	MAL8P1.143_14o15_5934	-0.170852698	0.082744889	0.253597587	0.079498179	0.445590672	FALSE
3	MAL8P1.143_3o15_6506	-0.127657024	-0.111074132	0.016582893	0.863386669	0.90333441	FALSE
4	PF3D7_0100100.iso1.exon2.amp1_1871	-0.222623658	-0.015788631	0.206835027	0.154992236	0.446174939	FALSE
5	PF3D7_0100200.iso1.exon1.amp1_706	-0.267439836	0.023753766	0.291193602	0.09361597	0.445590672	FALSE
6	PF3D7_0100300.iso1.exon1.amp1_1010	-0.125516106	-0.037412662	0.088103443	0.361139048	0.548068169	FALSE
7	PF3D7_0100300.iso1.exon2.amp1_1317	-0.103638074	0.0083357	0.111973774	0.11146218	0.445590672	FALSE
8	PF3D7_0100400.iso1.exon2.amp1_991	-0.231319617	0.063884131	0.295203747	0.058566011	0.445590672	FALSE
9	PF3D7_0100600.iso1.exon1.amp1_2163	-0.182304394	0.086661232	0.268965626	0.258912232	0.483027211	FALSE
10	PF3D7_0100800.iso1.exon2.amp1_133	-0.201965478	-0.06347557	0.138489908	0.254025529	0.479108298	FALSE
11	PF3D7_0100900.iso1.exon1.amp1_2446	-0.290617862	0.022703539	0.313321402	0.112065366	0.445590672	FALSE
12	PF3D7_0101000.iso1.exon1.amp1_2157	-0.157675042	0.050590364	0.208265405	0.02175893	0.445590672	FALSE
13	PF3D7_0101100.iso1.exon1.amp1_3004	-0.117125326	0.102838926	0.219964252	0.041462756	0.445590672	FALSE
14	PF3D7_0101300.iso1.exon2.amp1_4146	-0.273743254	0.08261559	0.356358844	0.099792093	0.445590672	FALSE
15	PF3D7_0101600.iso1.exon1.amp1_3887	0.10946656	0.03110823	-0.07835833	0.63486631	0.737739384	FALSE
16	PF3D7_0101800.iso1.exon1.amp1_2719	-0.211979557	0.069745736	0.281725293	0.039889307	0.445590672	FALSE
17	PF3D7_0101900.iso1.exon1.amp1_123	-0.180748299	0.000323362	0.181071661	0.185676343	0.451638999	FALSE
18	PF3D7_0102200.e1s1_8021	-0.084900477	0.048227481	0.133127958	0.178787237	0.451638999	FALSE
19	PF3D7_0102200.e2s1_7477	0.012225368	-0.012922037	-0.025147405	0.929034769	0.952048154	FALSE
20	PF3D7_0102200.e2s2_7188	-0.006474993	0.104529653	0.111004646	0.631508591	0.735666842	FALSE
21	PF3D7_0102500.e1s2_8945	-0.069785861	-0.006505399	0.063280462	0.738208753	0.817833798	FALSE
22	PF3D7_0102600.2o3_6170	-0.065989664	-0.013731245	0.052258419	0.496085762	0.637207731	FALSE
23	PF3D7_0102700.2o2_7571	-0.240836643	0.026004515	0.266841158	0.089960988	0.445590672	FALSE
24	PF3D7_0103400.e1s1_5925	-0.084519278	0.17271381	0.257233087	0.141001857	0.446174939	FALSE
25	PF3D7_0103500.2o7_7085	-0.075037119	0.047774593	0.122811712	0.494977253	0.636327614	FALSE
26	PF3D7_0103800.e4s1_7155	-0.186900076	0.017832425	0.2047325	0.117129308	0.445590672	FALSE
27	PF3D7_0103900.1o1_9076	0.041466034	0.087483374	0.046017341	0.836507592	0.888136043	FALSE
28	PF3D7_0104000.3o3_6106	-0.106064015	-0.009052514	0.097011501	0.223907082	0.462690334	FALSE
29	PF3D7_0104100.1o2_5053	-0.110304515	0.04246202	0.152766535	0.157883974	0.446174939	FALSE
30	PF3D7_0104100.2o2_5342	0.153513116	0.067022957	-0.086490158	0.700115688	0.790626012	FALSE
31	PF3D7_0104600.e1s1_7213	-0.037416304	0.064152325	0.101568628	0.555170427	0.681230239	FALSE
32	PF3D7_0105600.e2_4833	-0.05194587	0.04366736	0.09561323	0.27659358	0.49298223	FALSE
33	PF3D7_0105700.iso1.exon1.amp2_233	-0.076248117	0.106852518	0.183100635	0.31789961	0.520982321	FALSE
34	PF3D7_0105700.iso1.exon1.amp3_522	-0.106871796	0.024847084	0.131718879	0.299767857	0.50644154	FALSE
35	PF3D7_0105900.iso1.exon1.amp1_short_2005	-0.067331588	0.072826684	0.140158272	0.033908079	0.445590672	FALSE
36	PF3D7_0106200.iso1.exon1.amp1_3577	-0.061030207	-0.050452001	0.010578206	0.896573385	0.930763337	FALSE
37	PF3D7_0106500.iso1.exon1.amp1_2562	-0.121709764	-0.048154285	0.073555479	0.513640169	0.650719196	FALSE
38	PF3D7_0107900.iso1.exon1.amp1_696	-0.094673038	0.146821532	0.24149457	0.08352935	0.445590672	FALSE
39	PF3D7_0108000.e1s1_7463	-0.126184462	0.013632551	0.139817013	0.21554597	0.460244033	FALSE
40	PF3D7_0108300.s1_7972	-0.33993773	-0.015932986	0.324004745	0.179870597	0.451638999	FALSE
41	PF3D7_0108300.s2_7111	-0.294599782	0.045857508	0.340457291	0.192928736	0.459106299	FALSE
42	PF3D7_0108300.s3_7689	-0.183023853	-0.063714465	0.119309388	0.596271283	0.714514617	FALSE
43	PF3D7_0108400.iso1.exon1.amp1_short_3733	-0.133962038	0.008524789	0.142486827	0.147753671	0.446174939	FALSE
44	PF3D7_0108400.iso1.exon7.amp1_45	-0.087905633	-0.062480035	0.025425598	0.83749248	0.888845161	FALSE
45	PF3D7_0108600.iso1.exon4.amp1_4380	-0.12000394	0.022112987	0.142116927	0.166759789	0.451638999	FALSE
46	PF3D7_0108600.iso1.exon5.amp1_634	-0.027163762	-0.027346395	-0.000182633	0.995630332	0.996340989	FALSE
47	PF3D7_0108700.e1s1_7776	-0.172219584	0.03271399	0.204933574	0.251921376	0.478906805	FALSE
48	PF3D7_0108800.iso1.exon6.amp1_1233	-0.120976543	-0.025927866	0.095048678	0.251280318	0.478336736	FALSE
49	PF3D7_0109200.iso1.exon1.amp1_2413	-0.071396913	0.059030155	0.130427068	0.11505263	0.445590672	FALSE
50	PF3D7_0109800.1o1_7336	-0.079602607	0.061806459	0.141409066	0.379763279	0.560518014	FALSE
51	PF3D7_0109900.iso2.exon16.amp1_324	-0.183820789	-0.002498071	0.181322718	0.084631535	0.445590672	FALSE
52	PF3D7_0110000.1o1_8428	-0.092231588	0.090342259	0.182573847	0.223746322	0.462690334	FALSE
53	PF3D7_0110500.e1s2_5766	0.06112541	-0.01164915	-0.07277456	0.570588173	0.693372444	FALSE
54	PF3D7_0110500.e1s3_5188	-0.105414602	0.05648717	0.161901772	0.209819455	0.459216362	FALSE
55	PF3D7_0110600.e1s1_6533	-0.248183026	-0.023004636	0.22517839	0.280583229	0.49506708	FALSE
56	PF3D7_0110600.e3_5665	2.61E-05	0.024223991	0.024197905	0.756312018	0.828261914	FALSE
57	PF3D7_0110700.e1s1_7186	-0.085543164	-0.024132375	0.061410789	0.441579208	0.597869676	FALSE
58	PF3D7_0110800.iso1.exon3.amp1_2717	-0.110736129	0.064751975	0.175488104	0.049311878	0.445590672	FALSE
59	PF3D7_0111000.e1s2_6049	-0.136623671	0.121620996	0.258244667	0.203604898	0.459216362	FALSE
60	PF3D7_0111000.e5s1_5681	-0.068458478	0.008864123	0.077322602	0.280932832	0.49506708	FALSE
61	PF3D7_0111300.iso1.exon1.amp1_1701	-0.153328879	0.01837914	0.171708018	0.066159947	0.445590672	FALSE
62	PF3D7_0111500.e4s1_8619	-0.182486214	-0.01775996	0.164726254	0.189046427	0.455627108	FALSE
63	PF3D7_0111500.e5s1_5099	-0.087903951	-0.019692281	0.06821167	0.521981427	0.655156058	FALSE
64	PF3D7_0111700.iso1.exon1.amp1_961	-0.085917463	-0.003049453	0.082868009	0.230366709	0.466049286	FALSE
65	PF3D7_0112000.3o4_5862	-0.173420917	0.131433859	0.304854776	0.011400842	0.445590672	FALSE
66	PF3D7_0112100.1o1_6684	0.018877139	0.035736498	0.016859359	0.916766415	0.943344231	FALSE
67	PF3D7_0112200.iso1.exon1.amp2_183	-0.225880314	0.026531527	0.252411842	0.079579458	0.445590672	FALSE
68	PF3D7_0113100.iso1.exon1.amp1_4475	-0.053367626	0.041603136	0.094970762	0.553400521	0.679989071	FALSE
69	PF3D7_0113100.iso1.exon2.amp1_4270	-0.104901289	0.053383626	0.158284915	0.197536044	0.459216362	FALSE
70	PF3D7_0113100.iso1.exon2.amp2_3349	-0.052208074	0.024310577	0.076518651	0.578582948	0.698384238	FALSE
71	PF3D7_0113300.2o2_5313	-0.153621037	0.097298149	0.250919186	0.042453424	0.445590672	FALSE
72	PF3D7_0113400.2o2_8752	-0.009078853	0.130921767	0.14000062	0.553087799	0.679989071	FALSE
73	PF3D7_0113800.2o4_7664	-0.04843475	0.050133347	0.098568097	0.434234412	0.593386111	FALSE
74	PF3D7_0113800.3o4_7092	-0.084212105	0.083192494	0.167404599	0.246748456	0.475696555	FALSE
75	PF3D7_0113900.2o2_5532	-0.086119282	0.038279139	0.124398421	0.517739317	0.652174773	FALSE
76	PF3D7_0114000.e2s2_8371	0.013919311	-0.007535973	-0.021455284	0.838416419	0.88908086	FALSE
77	PF3D7_0114100.iso1.exon1.amp1_2718	-0.224377826	0.069904471	0.294282297	0.138749002	0.446174939	FALSE
78	PF3D7_0115000.e1s1_6895	-0.041638043	0.050344496	0.091982539	0.27602746	0.492981527	FALSE
79	PF3D7_0115200.iso1.exon2.amp1_719	-0.222787848	0.046282652	0.2690705	0.011260926	0.445590672	FALSE
80	PF3D7_0115300.iso1.exon2.amp1_1279	-0.07851867	0.002300643	0.080819313	0.337990283	0.534531727	FALSE
81	PF3D7_0115400.iso1.exon2.amp1_2714	-0.358320979	0.064500574	0.422821553	0.098969451	0.445590672	FALSE
82	PF3D7_0115700.iso1.exon1.amp1_1583	-0.377939929	-0.017731378	0.360208551	0.106816611	0.445590672	FALSE
83	PF3D7_0115700.iso1.exon2.amp2_4262	-0.139565315	0.003994792	0.143560107	0.161639701	0.446174939	FALSE
84	PF3D7_0200100 (renamed)_4770	-0.225930237	0.104963437	0.330893674	0.02464458	0.445590672	FALSE
85	PF3D7_0200100.iso1.exon2.amp1_2746	-0.216099731	-0.009409704	0.206690027	0.03661795	0.445590672	FALSE
86	PF3D7_0200200.iso1.exon1.amp1_1284	-0.244530507	0.011859231	0.256389737	0.113372432	0.445590672	FALSE
87	PF3D7_0200400.iso1.exon1.amp1_1275	-0.33720509	-0.034081531	0.303123559	0.212515346	0.459216362	FALSE
88	PF3D7_0200500.iso1.exon1.amp1_3303	-0.342747708	0.082326591	0.425074299	0.01313849	0.445590672	FALSE
89	PF3D7_0200600.iso1.exon1.amp1_2442	-0.243677179	0.03339695	0.277074129	0.229202538	0.465674113	FALSE
90	PF3D7_0200700.iso1.exon1.amp1_700	-0.20689748	-0.00646645	0.20043103	0.117628146	0.445590672	FALSE
91	PF3D7_0200800.iso1.exon3.amp1_406	-0.21195816	-0.022818777	0.189139382	0.151810854	0.446174939	FALSE
92	PF3D7_0201000.iso1.exon1.amp1_3595	-0.089731028	-0.048089285	0.041641744	0.656601753	0.75672475	FALSE
93	PF3D7_0201200.iso1.exon2.amp1_3603	-0.226570792	0.078427857	0.304998649	0.152504708	0.446174939	FALSE
94	PF3D7_0201300.iso1.exon2.amp1_119	-0.283257623	0.009121194	0.292378817	0.226796767	0.464090844	FALSE
95	PF3D7_0201500.2o2_5533	-0.084280613	-0.025405607	0.058875006	0.668704966	0.76548718	FALSE
96	PF3D7_0201700.2o2_8813	-0.163153667	0.004673032	0.167826699	0.036005683	0.445590672	FALSE
97	PF3D7_0201800.iso1.exon1.amp1_4451	-0.040184665	0.10468898	0.144873645	0.373546885	0.556520742	FALSE
98	PF3D7_0201800.iso1.exon2.amp1_3566	0.004366888	-0.025934558	-0.030301446	0.661478285	0.75984642	FALSE
99	PF3D7_0201900.e2s1_5490	0.01910339	0.003604529	-0.015498861	0.786040031	0.848837005	FALSE
100	PF3D7_0202000.e2s1_8364	-0.194584677	-0.046654042	0.147930635	0.285454021	0.497068551	FALSE
101	PF3D7_0202300.2o2_8437	0.088189779	-0.055031759	-0.143221539	0.423614994	0.588942368	FALSE
102	PF3D7_0202400.e1s1_5756	-0.043145943	0.006202479	0.049348422	0.246812849	0.475696555	FALSE
103	PF3D7_0202500.1o1_7250	-0.01081284	0.0306949	0.04150774	0.817086179	0.872803675	FALSE
104	PF3D7_0202600.iso2.exon1.amp1_2518	-0.071430305	-0.017182159	0.054248147	0.623595395	0.731232209	FALSE
105	PF3D7_0202700.iso1.exon1.amp1_2186	-0.098595273	0.004000727	0.102595999	0.267887709	0.490631702	FALSE
106	PF3D7_0203000.iso1.exon1.amp1_538	-0.133345127	0.001460423	0.13480555	0.092160328	0.445590672	FALSE
107	PF3D7_0203000.iso1.exon1.amp2_1055	-0.022760174	0.079525935	0.102286109	0.612432234	0.723361408	FALSE
108	PF3D7_0203100.e1s1_6609	-0.082757641	-0.036908667	0.045848974	0.577886805	0.698242014	FALSE
109	PF3D7_0203100.e2s2_7084	-0.053993396	0.028963554	0.08295695	0.446351447	0.601138068	FALSE
110	PF3D7_0203100.e2s3_5060	-0.14578685	0.014571033	0.160357883	0.176472396	0.451638999	FALSE
111	PF3D7_0203200.1o1_5016	-0.073704833	-0.021638894	0.052065939	0.565664313	0.691723826	FALSE
112	PF3D7_0203800.iso1.exon12.amp1_2119	-0.09354453	0.024474738	0.118019268	0.209372062	0.459216362	FALSE
113	PF3D7_0204100.iso1.exon1.amp1_247	-0.078329218	-0.008763711	0.069565507	0.375308761	0.557397122	FALSE
114	PF3D7_0204100.iso1.exon1.amp2_536	-0.066243013	-0.030304572	0.035938441	0.694487952	0.785536191	FALSE
115	PF3D7_0204100.iso1.exon1.amp3_476	0.068884143	-0.049466738	-0.118350881	0.154144288	0.446174939	FALSE
116	PF3D7_0204300.1o1_4751	0.059595511	0.115957494	0.056361983	0.755264371	0.828221078	FALSE
117	PF3D7_0204500.1o1_5582	-0.164111425	0.036726963	0.200838388	0.039905343	0.445590672	FALSE
118	PF3D7_0204600.iso1.exon1.amp2_seg2_1153	-0.068703666	0.09393994	0.162643606	0.256352925	0.480722141	FALSE
119	PF3D7_0204800.iso1.exon1.amp1_3895	-0.126376099	0.038116816	0.164492914	0.058669138	0.445590672	FALSE
120	PF3D7_0206000.s2_8261	-0.107580047	0.04810155	0.155681597	0.041868301	0.445590672	FALSE
121	PF3D7_0206100.1o4_7281	-0.065913466	0.024118216	0.090031683	0.660471266	0.759562594	FALSE
122	PF3D7_0206200.1o1_7052	-0.142331181	0.073931374	0.216262555	0.102239506	0.445590672	FALSE
123	PF3D7_0206800_8292	0.030919809	0.038479622	0.007559813	0.934474025	0.956205948	FALSE
124	PF3D7_0206900.1.1o2_4674	0.099600217	0.310182848	0.210582631	0.388264876	0.562418989	FALSE
125	PF3D7_0206900.1.2o2_5836	-0.100773177	0.041041521	0.141814698	0.153346298	0.446174939	FALSE
126	PF3D7_0206900.1.e1_8561	0.008616364	0.240724825	0.232108461	0.228056824	0.465369054	FALSE
127	PF3D7_0207000.1o2_6703	0.118009012	0.1276193	0.009610288	0.960940599	0.974272022	FALSE
128	PF3D7_0207000.2o2_6414	0.043808277	-0.019413671	-0.063221948	0.761892076	0.831586369	FALSE
129	PF3D7_0207000.e1_7116	0.126382724	0.053749877	-0.072632848	0.706549838	0.794691434	FALSE
130	PF3D7_0207100.s1_9173	-0.038882323	0.072696432	0.111578755	0.113368504	0.445590672	FALSE
131	PF3D7_0207200_6262	-0.091782048	0.013941939	0.105723987	0.17686461	0.451638999	FALSE
132	PF3D7_0207300.iso1.exon2.amp1_4172	-0.014505265	0.056945787	0.071451052	0.38586202	0.562418989	FALSE
133	PF3D7_0207300.iso1.exon5.amp1_1780	-0.087103951	-0.029336269	0.057767681	0.439389814	0.59695306	FALSE
134	PF3D7_0207400.4o4_5635	-0.031999118	0.031182224	0.063181342	0.206489912	0.459216362	FALSE
135	PF3D7_0207500.e1s1_8609	-0.165675664	-0.022812766	0.142862898	0.342923997	0.537784613	FALSE
136	PF3D7_0207500.e3s1_8088	-0.179784267	0.130017865	0.309802132	0.10196571	0.445590672	FALSE
137	PF3D7_0207600.e2s1_8341	-0.160511411	-0.035996313	0.124515098	0.576521111	0.69732793	FALSE
138	PF3D7_0207600.e4s1_8076	-0.15735024	0.064605074	0.221955314	0.114401387	0.445590672	FALSE
139	PF3D7_0207700.2o4_5642	-0.165028392	0.132120994	0.297149386	0.160465564	0.446174939	FALSE
140	PF3D7_0207700.4o4_8238	-0.067423511	-0.006651425	0.060772086	0.681910188	0.775061276	FALSE
141	PF3D7_0208000.4o4_7083	-0.064771529	0.013841868	0.078613397	0.367278326	0.554277948	FALSE
142	PF3D7_0208100.iso2.exon10.amp1_1520	0.047427476	-0.01713006	-0.064557535	0.703979454	0.793391635	FALSE
143	PF3D7_0208100.iso2.exon13.amp1_3822	-0.154868403	-0.00196205	0.152906354	0.446715244	0.601339195	FALSE
144	PF3D7_0208700.iso2.exon4.amp1_1767	-0.116715089	-0.024711696	0.092003393	0.274154219	0.492339431	FALSE
145	PF3D7_0208900.e1s3_5063	-0.105190107	0.009127709	0.114317816	0.27260172	0.492339431	FALSE
146	PF3D7_0209100.2o3_8219	0.043093736	0.110576422	0.067482686	0.663523761	0.761883958	FALSE
147	PF3D7_0209300.1o2_6694	-0.049055743	0.048218301	0.097274044	0.473491651	0.62445663	FALSE
148	PF3D7_0209400.2o7_8465	-0.105970743	-0.030222803	0.07574794	0.44982528	0.603651226	FALSE
149	PF3D7_0209800.e2_6830	-0.085317183	0.103997824	0.189315007	0.193858916	0.459106299	FALSE
150	PF3D7_0210200.iso1.exon2.amp2_seg1_2597	-0.202190968	0.186755077	0.388946045	0.057922441	0.445590672	FALSE
151	PF3D7_0210300.e2_9137	0.029800441	0.064765051	0.03496461	0.764458192	0.833090077	FALSE
152	PF3D7_0210600.3o5_4701	-0.096852883	-0.052097767	0.044755116	0.730762081	0.812801044	FALSE
153	PF3D7_0210700.1o1_6705	-0.092135699	0.043750953	0.135886651	0.042138964	0.445590672	FALSE
154	PF3D7_0211100.iso1.exon1.amp1_3153	-0.003141151	0.056974826	0.060115977	0.523223645	0.655842245	FALSE
155	PF3D7_0211100.iso1.exon1.amp2_1349	0.001080077	0.038796456	0.037716379	0.707898838	0.795889472	FALSE
156	PF3D7_0211200.1o1_7850	-0.107873942	0.011880398	0.11975434	0.441259911	0.597852192	FALSE
157	PF3D7_0211300.iso1.exon2.amp1_77	-0.045996126	0.085757114	0.13175324	0.031276351	0.445590672	FALSE
158	PF3D7_0211900.iso1.exon1.amp1_2450	-0.11399121	0.013291267	0.127282478	0.212876127	0.459216362	FALSE
159	PF3D7_0212200.iso1.exon2.amp1_4153	-0.118598404	0.020889386	0.13948779	0.162520336	0.446174939	FALSE
160	PF3D7_0212300.e3s1_4883	-0.007500751	0.042792449	0.0502932	0.658425893	0.757892531	FALSE
161	PF3D7_0212400.3o3_6803	0.006837954	0.098013966	0.091176012	0.424212594	0.58914914	FALSE
162	PF3D7_0212500.iso1.exon1.amp1_3098	-0.019430197	0.051683389	0.071113586	0.225384181	0.463802224	FALSE
163	PF3D7_0212700.1o1_4996	0.011703742	-0.020121563	-0.031825305	0.585015006	0.704328929	FALSE
164	PF3D7_0212900.1o1_9032	-0.09817486	0.038431457	0.136606317	0.374810035	0.556951425	FALSE
165	PF3D7_0213000.1o1_4661	-0.08374558	0.032214958	0.115960537	0.288651144	0.498999882	FALSE
166	PF3D7_0213400.iso1.exon2.amp1_388	-0.047544415	-0.004496678	0.043047737	0.583326295	0.702899412	FALSE
167	PF3D7_0213400.iso1.exon3.amp1_84	-0.154989625	0.002330802	0.157320427	0.204239508	0.459216362	FALSE
168	PF3D7_0213500.iso1.exon3.amp1_4447	-0.097963294	0.091392166	0.18935546	0.072740985	0.445590672	FALSE
169	PF3D7_0213900.iso1.exon1.amp2_1348	-0.083806346	-0.067420705	0.016385641	0.858543383	0.900966843	FALSE
170	PF3D7_0214100.e1s1_6246	-0.290522899	0.026377531	0.316900429	0.053598651	0.445590672	FALSE
171	PF3D7_0214300.iso1.exon1.amp1_2559	-0.130087094	0.076311871	0.206398965	0.022308858	0.445590672	FALSE
172	PF3D7_0214300.iso1.exon1.amp2_2848	0.021979331	0.04786127	0.025881939	0.793898135	0.854873415	FALSE
173	PF3D7_0215700.e2s2_6920	-0.238003854	0.114566282	0.352570136	0.02657076	0.445590672	FALSE
174	PF3D7_0216400.1o1_7065	-0.171402341	0.136167141	0.307569483	0.032471313	0.445590672	FALSE
175	PF3D7_0216700.1.6o7_7390	-0.124004915	0.012831916	0.136836831	0.085225444	0.445590672	FALSE
176	PF3D7_0216700.iso2.exon6.amp1_679	-0.176817167	-0.039805216	0.137011952	0.266129707	0.489125116	FALSE
177	PF3D7_0216900.1o1_7051	-0.1209924	0.108286956	0.229279356	0.009857316	0.445590672	FALSE
178	PF3D7_0217400.2o2_6962	-0.190956325	0.225632135	0.41658846	0.01012496	0.445590672	FALSE
179	PF3D7_0217700.iso1.exon1.amp1_3848	-0.179223388	-0.021918481	0.157304907	0.131078547	0.445590672	FALSE
180	PF3D7_0217900.e1s1_7766	0.024753334	0.04230351	0.017550176	0.875438512	0.914238208	FALSE
181	PF3D7_0218300.1o4_6226	-0.125282862	0.014503356	0.139786218	0.116403578	0.445590672	FALSE
182	PF3D7_0218300.2o4_6804	-0.070693488	0.031376626	0.102070114	0.043326349	0.445590672	FALSE
183	PF3D7_0218300.e2_6243	-0.069192468	0.004691601	0.073884068	0.253580797	0.479108298	FALSE
184	PF3D7_0219300.1o1_5228	0.009076759	-0.012932669	-0.022009428	0.838970212	0.88908086	FALSE
185	PF3D7_0219400.iso1.exon2.amp1_1777	0.022048607	0.110277302	0.088228695	0.674237699	0.768833879	FALSE
186	PF3D7_0219600.e1s1_8817	-0.020278629	0.08451799	0.104796619	0.285395983	0.497068551	FALSE
187	PF3D7_0219700.2o2_6131	-0.130924789	-0.001024161	0.129900628	0.43341098	0.593386111	FALSE
188	PF3D7_0219900.2o2_6693	-0.169741019	0.011058774	0.180799793	0.149368419	0.446174939	FALSE
189	PF3D7_0220000.e2s1_7105	0.09439069	0.03169511	-0.06269558	0.571794162	0.694315527	FALSE
190	PF3D7_0220000.e2s2_7394	-0.002582531	-0.011754944	-0.009172413	0.959327222	0.974272022	FALSE
191	PF3D7_0220100.e2s1_7661	-0.133079037	0.058227882	0.19130692	0.085614907	0.445590672	FALSE
192	PF3D7_0220600.2o2_6976	-0.031802059	0.015988662	0.047790721	0.747634741	0.823396628	FALSE
193	PF3D7_0221400.iso1.exon2.amp1_3871	-0.120810553	-0.001738334	0.119072218	0.253181518	0.479108298	FALSE
194	PF3D7_0221600.1o1_5812	-0.22162888	0.044966744	0.266595624	0.080150382	0.445590672	FALSE
195	PF3D7_0222000.iso1.exon1.amp1_691	-0.199669952	0.056374285	0.256044237	0.033409582	0.445590672	FALSE
196	PF3D7_0222100.iso1.exon1.amp1_3007	-0.214734235	0.109705949	0.324440184	0.120940314	0.445590672	FALSE
197	PF3D7_0222500.iso1.exon2.amp1_987	-0.207023837	0.069413676	0.276437513	0.159167417	0.446174939	FALSE
198	PF3D7_0222600.iso1.exon2.amp1_1008	-0.232223157	0.063012224	0.295235381	0.123389391	0.445590672	FALSE
199	PF3D7_0222700.iso1.exon2.amp1_1289	-0.153168947	-0.011919031	0.141249915	0.361208979	0.548068169	FALSE
200	PF3D7_0222800.iso1.exon2.amp1_1564	-0.348102233	-0.009467925	0.338634308	0.180128913	0.451638999	FALSE
201	PF3D7_0222900.1o1_4649	-0.077569608	0.099766738	0.177336346	0.071361957	0.445590672	FALSE
202	PF3D7_0223100.iso1.exon2.amp1_989	-0.206130029	0.015196834	0.221326864	0.084754098	0.445590672	FALSE
203	PF3D7_0223200.iso1.exon2.amp1_3607	-0.226543783	-0.073618487	0.152925295	0.40789567	0.578513685	FALSE
204	PF3D7_0223300 (renamed)_6619	-0.130700629	0.035396592	0.166097221	0.181378924	0.451638999	FALSE
205	PF3D7_0223300.iso1.exon2.amp1_3611	-0.037580463	0.065290231	0.102870694	0.546909986	0.675684498	FALSE
206	PF3D7_0223400.iso1.exon2.amp1_1856	-0.158919074	0.000498464	0.159417538	0.15346308	0.446174939	FALSE
207	PF3D7_0223500.iso1.exon1.amp1_3027	-0.187421745	-0.01623695	0.171184795	0.162633203	0.446174939	FALSE
208	PF3D7_0223500.iso1.exon2.amp1_4551	-0.072009677	0.001995459	0.074005136	0.204797194	0.459216362	FALSE
209	PF3D7_0300100.iso1.exon2.amp1_138	-0.286856286	0.021031903	0.307888189	0.039316402	0.445590672	FALSE
210	PF3D7_0300200.iso1.exon1.amp1_3012	-0.328647734	0.063062423	0.391710157	0.117747427	0.445590672	FALSE
211	PF3D7_0300400.iso1.exon1.amp1_401	-0.308640834	-0.015197898	0.293442936	0.117091001	0.445590672	FALSE
212	PF3D7_0300500.iso1.exon1.amp1_134	-0.176894972	-0.036025135	0.140869837	0.299958936	0.50644154	FALSE
213	PF3D7_0300700.iso1.exon2.amp1_3592	-0.179220257	-0.064685556	0.1145347	0.390499721	0.563541543	FALSE
214	PF3D7_0300800.iso1.exon2.amp1_1572	-0.156451887	-0.00422002	0.152231866	0.348984769	0.541614365	FALSE
215	PF3D7_0300900.iso1.exon2.amp1_1555	-0.038100676	0.025070569	0.063171245	0.38477029	0.562418989	FALSE
216	PF3D7_0301100.2o2_9008	-0.018727434	0.081911376	0.10063881	0.211202311	0.459216362	FALSE
217	PF3D7_0301200.iso1.exon3.amp1_short_4317	-0.039038103	-0.023499778	0.015538325	0.855847604	0.899772585	FALSE
218	PF3D7_0301300.2o2_5567	-0.04352967	0.030140386	0.073670056	0.134660753	0.446174939	FALSE
219	PF3D7_0301400.2o2_4671	0.053685137	-0.017066562	-0.0707517	0.551375268	0.679007725	FALSE
220	PF3D7_0301500.2o2_6419	-0.107706539	-0.011390036	0.096316503	0.334320176	0.531726473	FALSE
221	PF3D7_0301700.e1s1_8026	-0.135918885	0.068063652	0.203982537	0.092406509	0.445590672	FALSE
222	PF3D7_0301700.e2s1_8045	-0.177976169	-0.066818487	0.111157682	0.607889159	0.72159857	FALSE
223	PF3D7_0301800.2o2_9014	-0.163043685	-0.096261293	0.066782392	0.722438529	0.80713895	FALSE
224	PF3D7_0301900.1o1_7888	0.037383883	0.090025517	0.052641633	0.774702431	0.840985527	FALSE
225	PF3D7_0302000.iso1.exon2.amp1_158	-0.139855016	-0.005899996	0.13395502	0.423643637	0.588942368	FALSE
226	PF3D7_0302200.1o9_6523	-0.127811392	-0.025488474	0.102322918	0.324472463	0.525020711	FALSE
227	PF3D7_0302200.9o9_6812	-0.066678772	0.01376194	0.080440712	0.119884441	0.445590672	FALSE
228	PF3D7_0302200.e1_5952	-0.094894973	0.017653822	0.112548795	0.477392248	0.625518203	FALSE
229	PF3D7_0302200.e2_6826	-0.05636877	0.023541651	0.079910421	0.313618797	0.519179175	FALSE
230	PF3D7_0302200.e8_5663	-0.073592052	0.032901344	0.106493396	0.142206592	0.446174939	FALSE
231	PF3D7_0302200.e9_5390	-0.12321673	0.03878767	0.1620044	0.189406018	0.455627108	FALSE
232	PF3D7_0302500.e1s1_7185	-0.176365056	0.083839086	0.260204142	0.021325625	0.445590672	FALSE
233	PF3D7_0302500.e6s1_5136	-0.077995009	0.031275675	0.109270684	0.321135358	0.522917273	FALSE
234	PF3D7_0302500.e9s1_6314	-0.182441508	0.066558318	0.248999826	0.230822103	0.466049286	FALSE
235	PF3D7_0302800.e1s1_6041	-0.265842856	0.112209021	0.378051878	0.053218908	0.445590672	FALSE
236	PF3D7_0302900.e1s1_5473	-0.167897104	-0.004908818	0.162988286	0.098582202	0.445590672	FALSE
237	PF3D7_0302900.e1s2_5184	-0.272057226	0.047319998	0.319377223	0.111160722	0.445590672	FALSE
238	PF3D7_0303200.e2s1_6620	-0.055389947	-0.03648264	0.018907306	0.745484134	0.822939423	FALSE
239	PF3D7_0303700.e1s1_6024	-0.094976582	0.201480216	0.296456798	0.075101169	0.445590672	FALSE
240	PF3D7_0303800.1o1_7036	0.023264348	0.072518884	0.049254536	0.434246897	0.593386111	FALSE
241	PF3D7_0304000.e4s1_5769	-0.164308033	-0.036400032	0.127908001	0.54899949	0.677374255	FALSE
242	PF3D7_0304100.1o1_7041	-0.006078902	0.018930791	0.025009692	0.816745425	0.872772169	FALSE
243	PF3D7_0304200.e1s1_8348	-0.088557299	0.031091803	0.119649102	0.413767826	0.581556383	FALSE
244	PF3D7_0304600_7131	0.389495729	0.826655057	0.437159327	0.016736779	0.445590672	FALSE
245	PF3D7_0305100.e1s3_8820	-0.050018021	0.016947099	0.066965121	0.476461382	0.625467095	FALSE
246	PF3D7_0305200.iso1.exon1.amp1_3725	-0.168249567	-0.059667109	0.108582457	0.415988081	0.582881658	FALSE
247	PF3D7_0305200.iso1.exon1.amp2_4239	-0.127338078	0.015962977	0.143301055	0.176448784	0.451638999	FALSE
248	PF3D7_0305500.e1s3_9107	-0.405303903	0.057037024	0.462340928	0.096063418	0.445590672	FALSE
249	PF3D7_0305600.1o1_7038	-0.156142659	0.108769394	0.264912053	0.177658212	0.451638999	FALSE
250	PF3D7_0306200.5o5_6140	-0.131667987	0.012525544	0.144193531	0.347184239	0.541057444	FALSE
251	PF3D7_0307300.1o1_7034	-0.124873387	0.005626503	0.13049989	0.297129392	0.505859633	FALSE
252	PF3D7_0307500.iso1.exon4.amp1_417	-0.081293522	-0.008424005	0.072869517	0.763445028	0.83250646	FALSE
253	PF3D7_0307700.e3s2_7088	-0.209662677	0.081862494	0.291525171	0.091022093	0.445590672	FALSE
254	PF3D7_0308000.1o1_8767	-0.222344441	0.04288026	0.265224701	0.139437802	0.446174939	FALSE
255	PF3D7_0308100.iso1.exon1.amp2_3062	-0.074902462	0.03939441	0.114296872	0.355744006	0.54506478	FALSE
256	PF3D7_0308300.e1s1_6328	-0.115509366	-0.038974226	0.07653514	0.459889748	0.611152064	FALSE
257	PF3D7_0308700.iso1.exon1.amp1_2745	-0.13300587	0.068354859	0.201360729	0.161222839	0.446174939	FALSE
258	PF3D7_0308900.iso1.exon1.amp2_1908	-0.054689394	0.031054771	0.085744166	0.061105393	0.445590672	FALSE
259	PF3D7_0309000.iso1.exon1.amp1_144	-0.220671081	-0.037315985	0.183355096	0.281970447	0.495475768	FALSE
260	PF3D7_0309100.iso1.exon5.amp1_2930	-0.005716249	0.000812877	0.006529126	0.924860215	0.949234276	FALSE
261	PF3D7_0309200.iso1.exon3.amp2_2542	-0.041658549	0.021565598	0.063224147	0.241707011	0.473286634	FALSE
262	PF3D7_0309600.e1s1_5717	-0.069793748	0.011077748	0.080871497	0.234851516	0.467595484	FALSE
263	PF3D7_0309900.iso1.exon2.amp1_655	-0.151746595	-0.007974538	0.143772056	0.247669357	0.475696555	FALSE
264	PF3D7_0310200.e1s3_7089	-0.234872372	0.06369087	0.298563242	0.144182738	0.446174939	FALSE
265	PF3D7_0310300.e1s1_6333	-0.168785473	-0.004490368	0.164295105	0.257034781	0.481446578	FALSE
266	PF3D7_0310300.e1s2_6327	-0.10541971	0.004260053	0.109679763	0.398422282	0.570775623	FALSE
267	PF3D7_0310500.e1s1_7495	-0.067097832	0.043526447	0.110624278	0.316662914	0.520982321	FALSE
268	PF3D7_0310500.e1s2_7206	-0.125208771	0.061806943	0.187015714	0.257840998	0.482312313	FALSE
269	PF3D7_0310500.e1s3_8946	-0.1683379	-0.042859412	0.125478488	0.436834716	0.595760964	FALSE
270	PF3D7_0310700.2o2_7252	-0.175484435	0.03047583	0.205960265	0.064463567	0.445590672	FALSE
271	PF3D7_0310800.1o1_6383	-0.067881501	-0.040953431	0.026928071	0.776497802	0.842282335	FALSE
272	PF3D7_0310800_9158	0.057824205	0.023364663	-0.034459542	0.839853166	0.88933092	FALSE
273	PF3D7_0311100.iso1.exon3.amp1_1794	-0.069236626	-0.000596606	0.06864002	0.522208912	0.655156058	FALSE
274	PF3D7_0311400.iso1.exon1.amp1_2120	-0.163664739	-0.03590666	0.127758079	0.369851589	0.555973899	FALSE
275	PF3D7_0311400.iso1.exon2.amp1_782	-0.095937597	0.102948476	0.198886073	0.181808999	0.451638999	FALSE
276	PF3D7_0311400.iso1.exon2.amp2_1071	-0.14305963	0.134408033	0.277467662	0.008620615	0.445590672	FALSE
277	PF3D7_0311600.2o5_9087	-0.125246766	0.037290849	0.162537615	0.066509674	0.445590672	FALSE
278	PF3D7_0311700.1o15_9041	-0.146988076	0.041936391	0.188924467	0.12073427	0.445590672	FALSE
279	PF3D7_0311800.e3_7124	-0.093332476	0.042773361	0.136105838	0.222956694	0.462351789	FALSE
280	PF3D7_0311900.1o1_5052	-0.081094762	0.038943646	0.120038408	0.211892757	0.459216362	FALSE
281	PF3D7_0312200.iso1.exon1.amp1_3720	-0.053656244	0.05124233	0.104898575	0.072157829	0.445590672	FALSE
282	PF3D7_0312300.1o1_7872	-0.052913742	0.007745244	0.060658986	0.301094046	0.506763328	FALSE
283	PF3D7_0312400.2o7_8753	0.15454694	0.488400559	0.333853619	0.167197111	0.451638999	FALSE
284	PF3D7_0313000.1o2_7579	-0.203344375	-0.052239344	0.151105031	0.373924778	0.556520742	FALSE
285	PF3D7_0313100.1o4_8505	0.011594771	-0.035499124	-0.047093895	0.768033522	0.835687231	FALSE
286	PF3D7_0313200.1o1_9000	-0.1336825	0.035793912	0.169476412	0.123312199	0.445590672	FALSE
287	PF3D7_0313300.iso1.exon5.amp1_931	-0.132660126	0.034815669	0.167475795	0.108332287	0.445590672	FALSE
288	PF3D7_0313400.iso1.exon1.amp1_445	-0.141598879	0.114159556	0.255758435	0.009783138	0.445590672	FALSE
289	PF3D7_0313600.5o6_7614	-0.046166414	0.058235776	0.10440219	0.088116064	0.445590672	FALSE
290	PF3D7_0313700.iso1.exon2.amp1_2360	-0.059343304	0.070740508	0.130083812	0.365781237	0.552613464	FALSE
291	PF3D7_0313800.5o5_7343	-0.127159384	0.027454457	0.15461384	0.143135574	0.446174939	FALSE
292	PF3D7_0315100.e1s1_7183	-0.170733577	0.080245009	0.250978587	0.02490096	0.445590672	FALSE
293	PF3D7_0315200.iso1.exon1.amp3_2789	-0.114887216	0.088035749	0.202922965	0.037354961	0.445590672	FALSE
294	PF3D7_0315400.1o1_8147	-0.258665908	-0.017756466	0.240909442	0.187263297	0.45266059	FALSE
295	PF3D7_0315900.2o2_5837	-0.096743944	0.057731508	0.154475451	0.208209232	0.459216362	FALSE
296	PF3D7_0316300.1.e3_6827	-0.129446402	0.031687372	0.161133774	0.147177461	0.446174939	FALSE
297	PF3D7_0316500.e1s1_5735	-0.082445586	0.068060391	0.150505977	0.245757593	0.475696555	FALSE
298	PF3D7_0317200.iso1.exon1.amp1_4590	-0.149620586	0.065300615	0.214921201	0.067192501	0.445590672	FALSE
299	PF3D7_0317200.iso1.exon1.amp2_3936	-0.169251206	0.06206851	0.231319716	0.097215649	0.445590672	FALSE
300	PF3D7_0317300.s2_8011	-0.07877185	0.032915958	0.111687808	0.395674563	0.568668105	FALSE
301	PF3D7_0317300.s3_7150	-0.094453618	0.070692644	0.165146262	0.202569351	0.459216362	FALSE
302	PF3D7_0317400.iso1.exon1.amp1_643	-0.131433769	-0.042414959	0.08901881	0.421778976	0.587515276	FALSE
303	PF3D7_0317400.iso1.exon2.amp1_3902	-0.0367429	0.025867691	0.062610591	0.573043983	0.694989329	FALSE
304	PF3D7_0317500.iso1.exon1.amp1_3396	-0.134213737	0.118439535	0.252653273	0.031832771	0.445590672	FALSE
305	PF3D7_0317500.iso1.exon2.amp1_942	-0.037984421	0.009754255	0.047738676	0.505366338	0.645285615	FALSE
306	PF3D7_0317700.e1s1_8247	0.063903168	0.044286521	-0.019616647	0.860155443	0.901635836	FALSE
307	PF3D7_0317700.e9s1_9185	-0.176475954	0.041292506	0.21776846	0.061699848	0.445590672	FALSE
308	PF3D7_0317800.1o1_7265	-0.092230884	0.085419119	0.177650003	0.057530477	0.445590672	FALSE
309	PF3D7_0318200.e1s1_8532	-0.22284027	-0.082727461	0.140112809	0.305530053	0.511161259	FALSE
310	PF3D7_0318200.e1s2_8534	-0.1916147	0.017560528	0.209175228	0.222700597	0.462351789	FALSE
311	PF3D7_0318200.e1s3_5066	-0.012738002	0.044502836	0.057240838	0.766894336	0.83477163	FALSE
312	PF3D7_0318500.iso1.exon1.amp3_2251	-0.230745471	-0.027525543	0.203219928	0.254197712	0.479108298	FALSE
313	PF3D7_0318500.iso1.exon1.amp4_222	-0.152712757	-0.084544909	0.068167848	0.713424902	0.80017737	FALSE
314	PF3D7_0318500.iso1.exon1.amp5_162	-0.04865272	-0.015953644	0.032699076	0.831671272	0.884737975	FALSE
315	PF3D7_0318600.iso1.exon1.amp1_836	-0.236993493	-0.025412793	0.2115807	0.138976885	0.446174939	FALSE
316	PF3D7_0318600.iso1.exon1.amp2_200	-0.196362415	0.031583547	0.227945961	0.042499405	0.445590672	FALSE
317	PF3D7_0319000.iso1.exon1.amp1_3432	-0.178584978	0.029172189	0.207757167	0.276933571	0.49298223	FALSE
318	PF3D7_0319100.1o1_7545	-0.15168903	0.021416957	0.173105987	0.15939352	0.446174939	FALSE
319	PF3D7_0319700.e1s1_5124	-0.156347959	0.120884702	0.277232661	0.021455473	0.445590672	FALSE
320	PF3D7_0319900.1o1_4676	-0.077627704	0.179769758	0.257397463	0.172465894	0.451638999	FALSE
321	PF3D7_0320200.iso1.exon1.amp1_3627	-0.044500477	-0.041076564	0.003423914	0.974112673	0.981798058	FALSE
322	PF3D7_0320400.e1s3_6638	-0.213376945	0.018248938	0.231625883	0.143839251	0.446174939	FALSE
323	PF3D7_0320500.1o1_8174	-0.104644869	-0.037303507	0.067341362	0.605410135	0.720530568	FALSE
324	PF3D7_0320800.e1s1_8898	-0.25498579	-0.016287489	0.2386983	0.139539937	0.446174939	FALSE
325	PF3D7_0320800.e2s1_4867	-0.181045527	0.097886218	0.278931745	0.036853023	0.445590672	FALSE
326	PF3D7_0321500.iso1.exon1.amp1_841	-0.025973084	-0.016266487	0.009706597	0.857456099	0.900755884	FALSE
327	PF3D7_0321600.e1_7117	-0.067328842	0.027657998	0.09498684	0.151711394	0.446174939	FALSE
328	PF3D7_0321800.iso1.exon1.amp1_234	-0.10463073	-0.002983745	0.101646986	0.240499766	0.472572772	FALSE
329	PF3D7_0322100.1o1_9067	-0.214584704	-0.032327719	0.182256985	0.333971134	0.531726473	FALSE
330	PF3D7_0322900.e2_5953	-0.018276608	-0.010348269	0.00792834	0.960766036	0.974272022	FALSE
331	PF3D7_0323300.1o1_6145	-0.009184351	-0.050743523	-0.041559172	0.605199548	0.720530568	FALSE
332	PF3D7_0323600.e1_5672	0.059032178	-0.00094676	-0.059978938	0.783003845	0.846392745	FALSE
333	PF3D7_0323800.e2s1_7381	-0.279144519	0.049735879	0.328880398	0.099290436	0.445590672	FALSE
334	PF3D7_0324100.2o2_5248	-0.10394268	0.037402463	0.141345143	0.387789971	0.562418989	FALSE
335	PF3D7_0324400.iso1.exon2.amp1_1578	-0.179299633	0.061954645	0.241254278	0.055021917	0.445590672	FALSE
336	PF3D7_0324600.iso1.exon2.amp1_3003	-0.336403865	0.040048012	0.376451877	0.141242183	0.446174939	FALSE
337	PF3D7_0324800.iso1.exon2.amp1_2158	-0.229706694	0.00083702	0.230543714	0.147013092	0.446174939	FALSE
338	PF3D7_0324900.iso1.exon1.amp1_2456	-0.184004548	0.026851895	0.210856444	0.04998651	0.445590672	FALSE
339	PF3D7_0324900.iso1.exon2.amp1_2239	-0.090557508	0.043808092	0.1343656	0.177612224	0.451638999	FALSE
340	PF3D7_0400100.iso1.exon1.amp1_3682	0.006886165	0.022572668	0.015686504	0.900152837	0.93331544	FALSE
341	PF3D7_0400100.iso1.exon1.amp2_3971	-0.109913651	0.06053671	0.170450362	0.138727979	0.446174939	FALSE
342	PF3D7_0400100.iso1.exon1.amp3_4260	-0.068093676	0.011114713	0.079208389	0.211359858	0.459216362	FALSE
343	PF3D7_0400100.iso1.exon2.amp1_4192	-0.251614696	0.013138865	0.26475356	0.051768976	0.445590672	FALSE
344	PF3D7_0400200.iso1.exon1.amp1_1876	-0.257907256	0.024740105	0.282647361	0.074213996	0.445590672	FALSE
345	PF3D7_0400300.iso1.exon1.amp1_2731	-0.312031729	-0.019127449	0.292904281	0.210912951	0.459216362	FALSE
346	PF3D7_0400400.iso1.exon1.amp1_1294	-0.013543136	0.055949854	0.06949299	0.632380984	0.735714369	FALSE
347	PF3D7_0400500.iso1.exon2.amp1_998	-0.309486245	0.01611266	0.325598905	0.152677462	0.446174939	FALSE
348	PF3D7_0400700.iso1.exon1.amp1_992	-0.248826521	0.061495727	0.310322248	0.082884241	0.445590672	FALSE
349	PF3D7_0400800.iso1.exon1.amp1_3008	-0.241456688	0.045341555	0.286798243	0.106177828	0.445590672	FALSE
350	PF3D7_0400900.iso1.exon1.amp1_1573	-0.172995994	0.016505649	0.189501643	0.064158233	0.445590672	FALSE
351	PF3D7_0401000.iso1.exon1.amp1_2432	-0.165900025	0.065060869	0.230960894	0.095686148	0.445590672	FALSE
352	PF3D7_0401200.iso1.exon2.amp1_2164	-0.270646036	0.070893774	0.34153981	0.020426298	0.445590672	FALSE
353	PF3D7_0401300.iso1.exon2.amp1_3599	-0.132700876	0.002479154	0.13518003	0.156258269	0.446174939	FALSE
354	PF3D7_0401400.iso1.exon2.amp1_1862	-0.265050943	-0.001986484	0.263064459	0.102005806	0.445590672	FALSE
355	PF3D7_0401600.iso2.exon3.amp1_3896	-0.05012542	-0.011685134	0.038440286	0.626797198	0.733224591	FALSE
356	PF3D7_0401900.1o1_7666	-0.073519044	0.072648396	0.14616744	0.15443893	0.446174939	FALSE
357	PF3D7_0402000 (renamed)_9038	-0.030999673	0.050226242	0.081225915	0.63535794	0.738004832	FALSE
358	PF3D7_0402000.e1s1_9149	-0.093363073	0.070720092	0.164083165	0.0391958	0.445590672	FALSE
359	PF3D7_0402100.e2s1_6909	-0.020528923	0.08918859	0.109717513	0.269904099	0.491755097	FALSE
360	PF3D7_0402200 (renamed)_8951	0.005088555	0.078175822	0.073087267	0.60972391	0.722103567	FALSE
361	PF3D7_0402400.2o2_4672	-0.130108119	-0.002362814	0.127745306	0.273298536	0.492339431	FALSE
362	PF3D7_0402600.iso1.exon1.amp1_4449	-0.33894278	0.059071776	0.398014556	0.05454503	0.445590672	FALSE
363	PF3D7_0403500.1o1_6443	-0.126612761	0.032224115	0.158836876	0.225662071	0.463802224	FALSE
364	PF3D7_0403900.iso1.exon1.amp1_1235	-0.127901172	-0.038803548	0.089097624	0.384956091	0.562418989	FALSE
365	PF3D7_0404100.iso1.exon1.amp1_2815	-0.069084945	0.064623747	0.133708692	0.234718354	0.467595484	FALSE
366	PF3D7_0404100.iso1.exon2.amp1_674	-0.109380219	-0.005112581	0.104267637	0.149172576	0.446174939	FALSE
367	PF3D7_0404200.iso1.exon2.amp1_2698	-0.12753978	0.053243918	0.180783698	0.041341629	0.445590672	FALSE
368	PF3D7_0404600.s3_7434	-0.153627884	-0.017723454	0.13590443	0.283340423	0.495475768	FALSE
369	PF3D7_0404600.s5_7440	-0.081554855	0.029982674	0.11153753	0.410737079	0.578747121	FALSE
370	PF3D7_0404700.1o2_6213	-0.12190416	-0.010602578	0.111301582	0.319177001	0.52127307	FALSE
371	PF3D7_0404800.1o2_6179	0.05563825	-0.014743595	-0.070381844	0.569570627	0.693372444	FALSE
372	PF3D7_0404800.e1_7407	0.072458225	0.029987589	-0.042470636	0.778648255	0.843635899	FALSE
373	PF3D7_0405300.iso1.exon1.amp1_1116	-0.228870604	0.081354265	0.310224869	0.033640486	0.445590672	FALSE
374	PF3D7_0405300.iso1.exon1.amp2_3940	-0.024648735	0.020865779	0.045514514	0.581832526	0.701400861	FALSE
375	PF3D7_0405400.e2s1_6356	-0.198052779	0.054950026	0.253002805	0.044128593	0.445590672	FALSE
376	PF3D7_0405400.e2s4_7512	-0.250800599	0.120067856	0.370868455	0.100447379	0.445590672	FALSE
377	PF3D7_0405600.2o9_6125	-0.092479029	-0.0614742	0.03100483	0.664112639	0.76224799	FALSE
378	PF3D7_0405700.iso1.exon1.amp1_1975	-0.176317994	-0.003766741	0.172551253	0.273997599	0.492339431	FALSE
379	PF3D7_0405700.iso1.exon1.amp3_181	-0.084032133	0.005892763	0.089924896	0.314681145	0.520262931	FALSE
380	PF3D7_0405900.e3s1_6875	-0.102628981	0.044376684	0.147005665	0.007286469	0.445590672	FALSE
381	PF3D7_0406200_8002	0.002698555	0.101767524	0.099068969	0.61659094	0.726437393	FALSE
382	PF3D7_0406500.iso1.exon2.amp4_169	0.043904012	0.001001931	-0.04290208	0.859940247	0.901635836	FALSE
383	PF3D7_0406700.iso1.exon9.amp1_3850	-0.179217568	-0.045172475	0.134045093	0.224507412	0.463222064	FALSE
384	PF3D7_0406800.iso1.exon3.amp1_3542	-0.02465211	-0.018006284	0.006645826	0.936141604	0.957308919	FALSE
385	PF3D7_0406900.4o8_8241	-0.148699105	-0.04425654	0.104442565	0.38835006	0.562418989	FALSE
386	PF3D7_0407000.1o1_5004	-0.10448825	0.087344404	0.191832654	0.12902329	0.445590672	FALSE
387	PF3D7_0407200.iso1.exon5.amp1_341	-0.242728088	-0.000314936	0.242413152	0.297116613	0.505859633	FALSE
388	PF3D7_0407700.e2s1_5470	0.013887916	-0.019727417	-0.033615332	0.534642779	0.666283712	FALSE
389	PF3D7_0407700.e2s2_6343	-0.119406447	0.195473289	0.314879735	0.087883781	0.445590672	FALSE
390	PF3D7_0408000.iso1.exon1.amp1_683	-0.029847884	0.047229647	0.077077531	0.331109251	0.529020137	FALSE
391	PF3D7_0408600_7148	-0.056931692	0.069437504	0.126369197	0.537318209	0.668532559	FALSE
392	PF3D7_0408700.e3s1_8902	-0.186353492	0.028760539	0.215114031	0.184595721	0.451638999	FALSE
393	PF3D7_0408700.e5s1_7160	-0.124161081	0.074043	0.198204081	0.245230004	0.475696555	FALSE
394	PF3D7_0408700.e6s1_5713	-0.049603069	0.081670406	0.131273475	0.141618586	0.446174939	FALSE
395	PF3D7_0408900.1.e3s1_7464	-0.023407851	0.024501403	0.047909254	0.487126288	0.631193212	FALSE
396	PF3D7_0409200.iso1.exon1.amp1_3910	-0.085154822	0.039348344	0.124503166	0.052596188	0.445590672	FALSE
397	PF3D7_0409500.2o2_7867	-0.040065873	0.098763513	0.138829386	0.298584231	0.50644154	FALSE
398	PF3D7_0409600.iso1.exon1.amp1_551	0.090310952	-0.01383721	-0.104148162	0.598676832	0.716164606	FALSE
399	PF3D7_0409600.iso1.exon1.amp2_1059	0.143231129	0.023939628	-0.119291501	0.493349066	0.636023348	FALSE
400	PF3D7_0409900.7o7_7316	-0.083575596	0.027555574	0.111131171	0.217421831	0.460244033	FALSE
401	PF3D7_0410300.1o2_7946	-0.17956868	0.121640914	0.301209594	0.107683311	0.445590672	FALSE
402	PF3D7_0410500.iso1.exon1.amp1_4441	-0.119920663	0.041410234	0.161330897	0.057310457	0.445590672	FALSE
403	PF3D7_0410800.iso1.exon1.amp2_1340	-0.281506173	0.114160647	0.39566682	0.079375728	0.445590672	FALSE
404	PF3D7_0410900.1o1_6799	0.145999219	0.038504194	-0.107495024	0.479011521	0.626581664	FALSE
405	PF3D7_0411000.iso1.exon1.amp1_3723	-0.24526055	0.002821109	0.248081659	0.148717222	0.446174939	FALSE
406	PF3D7_0411700.1o1_4939	-0.022292435	0.039148354	0.061440789	0.66711695	0.764444597	FALSE
407	PF3D7_0411900.iso1.exon1.amp1_724	-0.033721472	-0.030945548	0.002775923	0.961068621	0.974272022	FALSE
408	PF3D7_0411900.iso1.exon2.amp2_seg2_2021	-0.087345606	0.03767374	0.125019346	0.15061946	0.446174939	FALSE
409	PF3D7_0412000.1o1_7937	-0.262726108	0.078078224	0.340804331	0.087418326	0.445590672	FALSE
410	PF3D7_0412400.iso1.exon1.amp1_3330	-0.15814131	-0.021874674	0.136266636	0.217272792	0.460244033	FALSE
411	PF3D7_0412400.iso1.exon2.amp2_3106	-0.076275041	-0.005420993	0.070854047	0.330501255	0.528952921	FALSE
412	PF3D7_0412700.iso1.exon1.amp1_2752	-0.203822065	0.009913759	0.213735824	0.086602005	0.445590672	FALSE
413	PF3D7_0412700.iso1.exon2.amp2_1081	-0.070683725	0.121707454	0.192391179	0.120532295	0.445590672	FALSE
414	PF3D7_0412900.iso1.exon1.amp1_435	-0.057454198	0.081976993	0.139431191	0.382284543	0.561806006	FALSE
415	PF3D7_0412900.iso1.exon2.amp2_3385	-0.350108972	0.043640216	0.393749188	0.012111287	0.445590672	FALSE
416	PF3D7_0413200.iso1.exon1.amp1_2147	-0.102596107	0.031629713	0.134225821	0.279817705	0.494518852	FALSE
417	PF3D7_0413300.iso1.exon2.amp1_707	-0.187543327	0.002354091	0.189897418	0.046391998	0.445590672	FALSE
418	PF3D7_0414000.e2s1_8062	-0.087370435	0.035173524	0.12254396	0.049825625	0.445590672	FALSE
419	PF3D7_0414700.1o1_7337	-0.111249749	0.016975234	0.128224983	0.228909657	0.46545958	FALSE
420	PF3D7_0414900.e4s1_5677	-0.077430374	0.0294362	0.106866574	0.320020139	0.522010745	FALSE
421	PF3D7_0415000.1o1_7877	-0.160015862	0.063129084	0.223144946	0.044176469	0.445590672	FALSE
422	PF3D7_0415100.iso1.exon1.amp1_2166	-0.140006622	0.037725394	0.177732016	0.143227944	0.446174939	FALSE
423	PF3D7_0415300.iso1.exon1.amp1_4554	-0.164372597	0.039941776	0.204314373	0.065524594	0.445590672	FALSE
424	PF3D7_0415300.iso1.exon1.amp2_3693	-0.150785503	0.001213491	0.151998994	0.219240031	0.461613264	FALSE
425	PF3D7_0415400.1o1_6387	-0.085924475	-0.008581135	0.07734334	0.259998668	0.484409479	FALSE
426	PF3D7_0416300.iso1.exon1.amp2_462	-0.03323607	-0.04490856	-0.011672491	0.911752734	0.939909803	FALSE
427	PF3D7_0416400.iso1.exon2.amp1_1080	-0.056763646	0.052201406	0.108965052	0.501849081	0.642182675	FALSE
428	PF3D7_0416400.iso1.exon2.amp2_3664	-0.087211566	0.059455006	0.146666573	0.199535902	0.459216362	FALSE
429	PF3D7_0416600.1o1_5263	-0.038087696	0.002719587	0.040807283	0.763625754	0.83250646	FALSE
430	PF3D7_0416900.iso1.exon2.amp2_seg1_2886	-0.034831652	-0.009522713	0.025308939	0.730511956	0.812801044	FALSE
431	PF3D7_0417100.1o4_5878	-0.22182753	0.044060343	0.265887874	0.154903061	0.446174939	FALSE
432	PF3D7_0417400.iso1.exon1.amp4_seg2_2328	-0.271585383	-0.017086324	0.254499059	0.185261647	0.451638999	FALSE
433	PF3D7_0417400.iso1.exon1.amp6_seg1_1730	-0.030144771	0.071562093	0.101706864	0.360840548	0.548068169	FALSE
434	PF3D7_0418000.6o10_5641	-0.086332801	0.190308814	0.276641615	0.091449436	0.445590672	FALSE
435	PF3D7_0418000.7o10_5069	-0.064283534	0.034099173	0.098382707	0.343904141	0.538719112	FALSE
436	PF3D7_0418800.iso1.exon4.amp1_2929	-0.124409328	-0.028230209	0.096179119	0.273124734	0.492339431	FALSE
437	PF3D7_0419100.iso1.exon1.amp1_2401	-0.008561871	0.018179279	0.02674115	0.812800671	0.869550965	FALSE
438	PF3D7_0419200.1o1_6384	-0.146881674	-0.01198684	0.134894834	0.272440963	0.492339431	FALSE
439	PF3D7_0419300.iso1.exon1.amp1_2162	-0.125807682	-0.015767281	0.110040401	0.121346788	0.445590672	FALSE
440	PF3D7_0419400.2o4_8826	-0.098321344	-0.007088024	0.09123332	0.408923938	0.578513685	FALSE
441	PF3D7_0419400.3o4_9115	-0.099618943	0.10614752	0.205766463	0.024697665	0.445590672	FALSE
442	PF3D7_0419400.4o4_8537	-0.093061278	-0.056815884	0.036245394	0.755745387	0.828261914	FALSE
443	PF3D7_0419500.1o1_5301	0.010999792	0.001878718	-0.009121073	0.889837418	0.926170794	FALSE
444	PF3D7_0419700.1o1_8146	-0.216338854	-0.061820157	0.154518697	0.271993451	0.492339431	FALSE
445	PF3D7_0419900.iso1.exon3.amp1_2826	-0.176029915	0.035098648	0.211128563	0.277394384	0.493223749	FALSE
446	PF3D7_0419900.iso1.exon3.amp5_seg1_2006	-0.038582885	-0.016793672	0.021789213	0.842330452	0.891115673	FALSE
447	PF3D7_0420000.s2_5994	-0.096226838	0.140713171	0.236940009	0.01384504	0.445590672	FALSE
448	PF3D7_0420300.iso1.exon1.amp1_521	-0.179919708	0.027795247	0.207714955	0.183726562	0.451638999	FALSE
449	PF3D7_0420300.iso1.exon1.amp3_1099	-0.190742066	0.101844852	0.292586918	0.119670877	0.445590672	FALSE
450	PF3D7_0420300.iso1.exon1.amp4_seg1_3445	-0.278317408	0.040951994	0.319269402	0.126147463	0.445590672	FALSE
451	PF3D7_0420600.iso1.exon1.amp1_2477	-0.008045942	0.091602223	0.099648165	0.360434318	0.548022448	FALSE
452	PF3D7_0420700.e2s1_8336	-0.10703688	0.084649739	0.191686619	0.046267437	0.445590672	FALSE
453	PF3D7_0420900.iso1.exon1.amp1_4190	-0.164740739	0.058858807	0.223599546	0.064688596	0.445590672	FALSE
454	PF3D7_0421200.iso1.exon2.amp1_3312	-0.154274286	0.009092859	0.163367146	0.297854658	0.50644154	FALSE
455	PF3D7_0421300.iso1.exon1.amp1_2739	-0.249538874	0.076598508	0.326137381	0.027298633	0.445590672	FALSE
456	PF3D7_0421800.iso1.exon1.amp1_1236	-0.021243781	-0.0027562	0.018487581	0.728831867	0.811936653	FALSE
457	PF3D7_0422000.5o5_7285	-0.148187035	0.026452022	0.174639057	0.160293463	0.446174939	FALSE
458	PF3D7_0422100 (renamed)_7011	-0.241747951	0.063280418	0.305028369	0.172912528	0.451638999	FALSE
459	PF3D7_0422200.iso1.exon1.amp4_2550	-0.106759776	0.044338126	0.151097902	0.178126609	0.451638999	FALSE
460	PF3D7_0422300.e3s1_6907	-0.049713649	0.035851112	0.08556476	0.126677258	0.445590672	FALSE
461	PF3D7_0422400.e2s1_5434	-0.135076587	0.009590471	0.144667058	0.182690836	0.451638999	FALSE
462	PF3D7_0422500.e1s2_8254	-0.145423765	0.011104719	0.156528484	0.238363624	0.46999174	FALSE
463	PF3D7_0422500.e1s3_5652	-0.011105092	0.056767704	0.067872796	0.654345705	0.755055702	FALSE
464	PF3D7_0422700.e1s1_4878	-0.145335444	0.051755337	0.197090781	0.104296105	0.445590672	FALSE
465	PF3D7_0423100.iso1.exon1.amp1_3832	-0.148415695	-0.024310324	0.124105371	0.204147582	0.459216362	FALSE
466	PF3D7_0423400.1o1_7833	-0.082439632	0.037663217	0.120102849	0.343516822	0.538413175	FALSE
467	PF3D7_0423700.1o1_6673	-0.098707807	0.058871865	0.157579672	0.094457255	0.445590672	FALSE
468	PF3D7_0424200.iso1.exon1.amp2_2772	-0.204377391	0.04139684	0.24577423	0.207094506	0.459216362	FALSE
469	PF3D7_0424600.e2s1_8623	-0.185878866	0.032552387	0.218431253	0.062539563	0.445590672	FALSE
470	PF3D7_0424800.2o2_6416	-0.141408518	-0.122046846	0.019361672	0.835473109	0.887709965	FALSE
471	PF3D7_0425100.2o2_8127	-0.186216873	0.028716741	0.214933614	0.057894723	0.445590672	FALSE
472	PF3D7_0425200.2o2_5531	-0.135347538	0.03115986	0.166507398	0.163511739	0.446178312	FALSE
473	PF3D7_0425300.1o1_8130	-0.094105053	0.015526227	0.10963128	0.175620745	0.451638999	FALSE
474	PF3D7_0425500.iso1.exon1.amp1_1565	-0.356603256	-0.080559343	0.276043913	0.173282154	0.451638999	FALSE
475	PF3D7_0425700.iso1.exon1.amp1_4168	-0.26230885	0.028647986	0.290956836	0.162229289	0.446174939	FALSE
476	PF3D7_0425800.iso1.exon1.amp1_3955	-0.091668324	-0.000391599	0.091276725	0.352489384	0.543338268	FALSE
477	PF3D7_0425800.iso1.exon1.amp2_4244	-0.084029767	0.045460861	0.129490628	0.077174011	0.445590672	FALSE
478	PF3D7_0425800.iso1.exon2.amp1_4183	-0.023654239	0.07024683	0.093901069	0.376560385	0.558680038	FALSE
479	PF3D7_0425900.iso1.exon2.amp1_4457	-0.156253138	0.099728068	0.255981206	0.096726792	0.445590672	FALSE
480	PF3D7_0426000.iso1.exon1.amp1_4198	-0.127895044	0.014542756	0.1424378	0.050799671	0.445590672	FALSE
481	PF3D7_0500100.iso1.exon1.amp1_2232	-0.12284704	0.060090093	0.182937134	0.032383056	0.445590672	FALSE
482	PF3D7_0500100.iso1.exon2.amp1_1299	-0.244290122	0.07348872	0.317778842	0.058071235	0.445590672	FALSE
483	PF3D7_0500400.iso1.exon1.amp1_3882	-0.356456301	0.027151922	0.383608223	0.126260951	0.445590672	FALSE
484	PF3D7_0500500.iso1.exon1.amp1_2721	-0.246293983	0.067455146	0.313749129	0.067387886	0.445590672	FALSE
485	PF3D7_0500800.e1s1_7120	-0.048344139	-0.002054809	0.046289331	0.599030915	0.716282596	FALSE
486	PF3D7_0500800.e2s1_8081	-0.173403151	0.043797625	0.217200777	0.314014909	0.519467731	FALSE
487	PF3D7_0500900.iso1.exon2.amp1_442	-0.045400929	0.102878685	0.148279614	0.479578872	0.626581664	FALSE
488	PF3D7_0501000.e1s1_4842	-0.012670107	0.053840478	0.066510585	0.248482476	0.476895868	FALSE
489	PF3D7_0501000.e2s1_5152	-0.130533641	0.001867612	0.132401253	0.231815322	0.466049286	FALSE
490	PF3D7_0501100.1.e3s1_7453	-0.069573792	-0.001084025	0.068489768	0.504708849	0.644739687	FALSE
491	PF3D7_0501100.1.e4s1_6302	-0.149620731	-0.004636558	0.144984174	0.080771269	0.445590672	FALSE
492	PF3D7_0501100.iso2.exon3.amp1_2407	-0.052771521	-0.00361797	0.04915355	0.722798111	0.80713895	FALSE
493	PF3D7_0501200.e2_7703	-0.09278887	0.037131112	0.129919982	0.293229766	0.502777927	FALSE
494	PF3D7_0501500.e1s1_8931	-0.1592282	0.047330102	0.206558303	0.137480397	0.446174939	FALSE
495	PF3D7_0501600.e1s1_8642	-0.185055167	0.022421772	0.207476939	0.113338604	0.445590672	FALSE
496	PF3D7_0501800.e1s1_4880	-0.037782151	0.048195302	0.085977453	0.547894908	0.67648495	FALSE
497	PF3D7_0501800.e1s2_6042	0.117808193	0.04982535	-0.067982843	0.717169067	0.802771284	FALSE
498	PF3D7_0501900.iso1.exon2.amp1_2980	-0.193601669	-0.021212719	0.172388949	0.202925527	0.459216362	FALSE
499	PF3D7_0502000.iso1.exon2.amp1_1211	-0.204636285	-0.037297548	0.167338737	0.190594792	0.457271053	FALSE
500	PF3D7_0502200.2o2_5863	-0.149231846	0.066076359	0.215308205	0.044490768	0.445590672	FALSE
501	PF3D7_0502400.1o1_5886	-0.263998789	-0.042638917	0.221359871	0.372203435	0.556516845	FALSE
502	PF3D7_0502700.iso1.exon2.amp1_3857	-0.130066471	-0.030109425	0.099957045	0.5679002	0.693248655	FALSE
503	PF3D7_0502800.1o1_6679	-0.098940958	0.021913722	0.12085468	0.143540617	0.446174939	FALSE
504	PF3D7_0503000.5o5_8733	-0.09624775	-0.042227188	0.054020562	0.522892634	0.655720459	FALSE
505	PF3D7_0503600.e1s1_5436	-0.074291623	0.003204438	0.077496061	0.102784555	0.445590672	FALSE
506	PF3D7_0503600.e7s1_7736	-0.059770836	-0.000802513	0.058968322	0.474795512	0.625107218	FALSE
507	PF3D7_0503900.2o2_5032	-0.143277822	0.035344587	0.178622409	0.202525403	0.459216362	FALSE
508	PF3D7_0504200.2o3_7328	-0.097309414	0.075798882	0.173108297	0.042307073	0.445590672	FALSE
509	PF3D7_0504400.iso1.exon1.amp1_2757	-0.154934082	0.035117849	0.190051932	0.097708612	0.445590672	FALSE
510	PF3D7_0504500.5o6_9016	-0.083949526	0.029208944	0.113158469	0.4559924	0.607123784	FALSE
511	PF3D7_0504600_5397	-0.107153732	0.074454916	0.181608647	0.172095471	0.451638999	FALSE
512	PF3D7_0504800.iso1.exon1.amp1_1378	-0.112159257	-0.004722078	0.107437179	0.371608366	0.556516845	FALSE
513	PF3D7_0504800.iso1.exon1.amp2_1667	0.025807265	0.035677074	0.009869809	0.951256116	0.967823711	FALSE
514	PF3D7_0505100.iso1.exon1.amp1_1083	-0.214024213	0.053785071	0.267809283	0.100700972	0.445590672	FALSE
515	PF3D7_0505100.iso1.exon1.amp2_3685	-0.118794256	-0.047433603	0.071360653	0.60934564	0.722103567	FALSE
516	PF3D7_0505100.iso1.exon2.amp1_507	-0.12721553	0.047687039	0.174902569	0.325587668	0.525286433	FALSE
517	PF3D7_0505100.iso1.exon2.amp2_1332	-0.145697926	0.03112002	0.176817946	0.372826811	0.556516845	FALSE
518	PF3D7_0505200.e1s1_6332	-0.187558427	0.07284152	0.260399947	0.091149565	0.445590672	FALSE
519	PF3D7_0505400.1o1_4753	-0.062631852	0.084970778	0.14760263	0.03577368	0.445590672	FALSE
520	PF3D7_0505500.e1s1_4811	0.010760543	0.019030204	0.008269661	0.949303742	0.966780561	FALSE
521	PF3D7_0505500.e2_6247	-0.236049803	0.012417499	0.248467302	0.076763507	0.445590672	FALSE
522	PF3D7_0506200.1o1_7857	-0.139519466	0.029033883	0.168553349	0.193642085	0.459106299	FALSE
523	PF3D7_0506300.iso1.exon1.amp1_3900	-0.165328102	-0.014438984	0.150889118	0.259752009	0.484271697	FALSE
524	PF3D7_0506800.e1_6284	-0.096657547	0.009256088	0.105913635	0.439624846	0.59695306	FALSE
525	PF3D7_0506900.1o1_6208	-0.098719863	0.034086519	0.132806382	0.193827335	0.459106299	FALSE
526	PF3D7_0507200.iso1.exon1.amp1_150	-0.134441657	0.014959226	0.149400883	0.231543285	0.466049286	FALSE
527	PF3D7_0507300 (plasmodb revised)_5405	-0.110506776	0.047339848	0.157846625	0.200156248	0.459216362	FALSE
528	PF3D7_0507700.e1s1_5454	-0.123500206	0.037464549	0.160964755	0.023186233	0.445590672	FALSE
529	PF3D7_0507900.iso1.exon2.amp1_43	-0.176988185	-0.011648868	0.165339317	0.090127924	0.445590672	FALSE
530	PF3D7_0508000.1o1_6429	-0.080789056	-0.041717229	0.039071826	0.621843932	0.730171853	FALSE
531	PF3D7_0508400.4o4_6424	0.048056676	-0.018463547	-0.066520223	0.564094345	0.690652595	FALSE
532	PF3D7_0508500.s3_4828	-0.150404617	0.08496766	0.235372278	0.122476733	0.445590672	FALSE
533	PF3D7_0508600.iso1.exon1.amp1_3875	-0.09663467	0.008332499	0.104967169	0.266162207	0.489125116	FALSE
534	PF3D7_0508900.iso1.exon1.amp1_1678	-0.007755427	0.009852235	0.017607662	0.722749573	0.80713895	FALSE
535	PF3D7_0508900.iso1.exon1.amp2_1967	-0.022920918	0.091176779	0.114097697	0.231060832	0.466049286	FALSE
536	PF3D7_0508900.iso1.exon1.amp4_4215	-0.014816157	0.035502395	0.050318552	0.409746141	0.578513685	FALSE
537	PF3D7_0509000.e5s1_6290	-0.121850284	0.061338628	0.183188911	0.064813164	0.445590672	FALSE
538	PF3D7_0509100.iso1.exon1.amp1_2855	-0.225881655	0.005620144	0.231501799	0.377698199	0.55946421	FALSE
539	PF3D7_0509100.iso1.exon1.amp2_3351	-0.171110026	0.001113898	0.172223925	0.194673751	0.459216362	FALSE
540	PF3D7_0509200.iso1.exon4.amp1_392	-0.103271803	0.005485965	0.108757768	0.378960039	0.560392687	FALSE
541	PF3D7_0509500.1o1_6441	-0.002899312	-0.002031064	0.000868248	0.993105931	0.994524653	FALSE
542	PF3D7_0509600.2o2_7637	-0.178828139	0.001599647	0.180427786	0.209754254	0.459216362	FALSE
543	PF3D7_0509700.e4s1_9186	0.003603514	0.04534852	0.041745006	0.447111361	0.601583616	FALSE
544	PF3D7_0509800.2o4_8246	-0.111742777	0.05071642	0.162459197	0.225990868	0.463893406	FALSE
545	PF3D7_0509900.iso1.exon1.amp1_3597	-0.149331728	0.043332657	0.192664386	0.109332485	0.445590672	FALSE
546	PF3D7_0510100.iso1.exon1.amp2_4582	-0.234720497	0.01761562	0.252336117	0.122157468	0.445590672	FALSE
547	PF3D7_0510100.iso1.exon1.amp3_1915	-0.254248936	-0.07430811	0.179940826	0.340655643	0.536509932	FALSE
548	PF3D7_0510400.1o1_8464	-0.06503288	-0.063397132	0.001635748	0.987244329	0.990313337	FALSE
549	PF3D7_0510800.1o1_4938	-0.202079365	-0.034966716	0.167112649	0.234004722	0.467595484	FALSE
550	PF3D7_0511100.iso1.exon2.amp1_1537	-0.127812109	-0.0552702	0.072541909	0.244532118	0.475696555	FALSE
551	PF3D7_0511300.iso1.exon1.amp1_2538	-0.173813344	0.001444953	0.175258298	0.309267059	0.514344504	FALSE
552	PF3D7_0511400.1o1_4698	-0.064163529	0.033968021	0.098131549	0.152444506	0.446174939	FALSE
553	PF3D7_0511400_8865	-0.114537721	0.001141543	0.115679264	0.352554259	0.543338268	FALSE
554	PF3D7_0511500.s1_7710	-0.052878652	0.068243659	0.121122311	0.28341928	0.495475768	FALSE
555	PF3D7_0511500.s3_7138	-0.127949197	-0.010376059	0.117573137	0.478850205	0.626581664	FALSE
556	PF3D7_0511500.s4_7427	-0.011917341	0.13702199	0.148939331	0.242429113	0.474038517	FALSE
557	PF3D7_0511600.1o1_5809	-0.157345285	0.097112065	0.25445735	0.339313995	0.535509936	FALSE
558	PF3D7_0512100.iso1.exon2.amp1_3546	-0.024860538	-0.0762862	-0.051425662	0.606655166	0.721255328	FALSE
559	PF3D7_0512600.e6s1_7173	-0.041322758	-0.018040539	0.023282219	0.705563907	0.794538633	FALSE
560	PF3D7_0512900.iso1.exon1.amp1_3002	-0.018505868	0.037018861	0.055524729	0.412102108	0.579796443	FALSE
561	PF3D7_0513000.e1s1_5733	-0.068101588	0.038467629	0.106569217	0.27204634	0.492339431	FALSE
562	PF3D7_0513100.2o3_7569	-0.070389335	-0.018730831	0.051658504	0.745752166	0.822939423	FALSE
563	PF3D7_0513200.e2s3_5488	-0.003985947	0.039513833	0.043499779	0.774447557	0.840985527	FALSE
564	PF3D7_0513300.e1s1_8334	-0.107068134	-0.007555818	0.099512316	0.308740144	0.514344504	FALSE
565	PF3D7_0513400.iso1.exon2.amp1_92	-0.16066297	-0.032920068	0.127742902	0.232524278	0.467047331	FALSE
566	PF3D7_0513700.e3s1_8904	-0.098783475	0.012577352	0.111360826	0.198609688	0.459216362	FALSE
567	PF3D7_0514000.iso1.exon2.amp1_129	0.082251251	0.022992046	-0.059259204	0.513793773	0.650719196	FALSE
568	PF3D7_0514100.iso1.exon1.amp2_3648	-0.056266659	-0.036660434	0.019606225	0.812457974	0.869516091	FALSE
569	PF3D7_0514600.iso1.exon2.amp1_2392	-0.134005125	0.036416364	0.170421489	0.106497841	0.445590672	FALSE
570	PF3D7_0514900.1o1_8458	-0.089383212	-0.011838584	0.077544628	0.21944739	0.461613264	FALSE
571	PF3D7_0516000.iso1.exon1.amp1_2533	-0.048166455	0.06154573	0.109712185	0.17957471	0.451638999	FALSE
572	PF3D7_0516400.1o1_9029	-0.263098189	0.020588374	0.283686563	0.130492476	0.445590672	FALSE
573	PF3D7_0516500.5o6_7013	-0.06936611	0.028340597	0.097706707	0.348102122	0.541293918	FALSE
574	PF3D7_0516600.s1_6862	0.077234071	0.030466249	-0.046767822	0.651844086	0.753071778	FALSE
575	PF3D7_0516600.s2_5122	-0.062090168	0.035993969	0.098084138	0.434011335	0.593386111	FALSE
576	PF3D7_0516800.iso1.exon1.amp2_530	-0.120845036	-0.049208154	0.071636882	0.525376703	0.658246771	FALSE
577	PF3D7_0516800.iso1.exon1.amp3_1048	-0.039827361	0.054107824	0.093935184	0.246976837	0.475696555	FALSE
578	PF3D7_0517600.1o1_7287	-0.272912913	-0.006454958	0.266457955	0.060065969	0.445590672	FALSE
579	PF3D7_0517700_5368	-0.080054732	0.064814245	0.144868977	0.137983947	0.446174939	FALSE
580	PF3D7_0517900.2o2_7334	-0.133229788	0.04295702	0.176186808	0.228682009	0.46545958	FALSE
581	PF3D7_0518400.iso1.exon1.amp1_4147	-0.095333992	-0.000818255	0.094515737	0.222392799	0.462351789	FALSE
582	PF3D7_0518600.iso1.exon1.amp1_1407	-0.259504475	0.219110471	0.478614946	0.025293561	0.445590672	FALSE
583	PF3D7_0518600.iso1.exon1.amp2_1924	-0.115615016	0.102086617	0.217701633	0.106671608	0.445590672	FALSE
584	PF3D7_0518700.e1s1_5478	-0.086423396	-0.028294608	0.058128788	0.60159237	0.717509573	FALSE
585	PF3D7_0518700.e3s1_8039	-0.088435261	0.069639246	0.158074506	0.040502808	0.445590672	FALSE
586	PF3D7_0518800.iso1.exon7.amp1_2109	-0.155597909	-0.018956513	0.136641397	0.409351302	0.578513685	FALSE
587	PF3D7_0518900.iso1.exon1.amp1_2982	-0.119096853	-0.009728743	0.10936811	0.245116066	0.475696555	FALSE
588	PF3D7_0519000.iso1.exon1.amp1_4167	-0.072962404	0.031592569	0.104554972	0.097382905	0.445590672	FALSE
589	PF3D7_0519100.iso1.exon1.amp1_673	-0.038111443	0.033611243	0.071722686	0.205214655	0.459216362	FALSE
590	PF3D7_0519200.e2s1_5387	-0.108357901	-0.042462371	0.06589553	0.608565291	0.72159857	FALSE
591	PF3D7_0519300.1o1_9072	-0.01177099	0.007216077	0.018987067	0.788509441	0.850050163	FALSE
592	PF3D7_0519900.1o1_7902	-0.14622866	0.067448713	0.213677373	0.162663704	0.446174939	FALSE
593	PF3D7_0520000.e3s1_9191	-0.078401892	0.042053674	0.120455565	0.200800519	0.459216362	FALSE
594	PF3D7_0520100.e1s1_8338	-0.147995562	0.043843972	0.191839534	0.169805717	0.451638999	FALSE
595	PF3D7_0520400.e1s1_6896	-0.122900028	0.067334496	0.190234523	0.037251709	0.445590672	FALSE
596	PF3D7_0521200.iso1.exon1.amp1_717	-0.143268561	0.018864723	0.162133285	0.233509552	0.467595484	FALSE
597	PF3D7_0521300.iso1.exon3.amp1_2837	-0.063570986	0.055287247	0.118858233	0.388704082	0.562418989	FALSE
598	PF3D7_0521300.iso1.exon3.amp2_seg2_577	-0.051079281	-0.068646225	-0.017566943	0.842492029	0.891115673	FALSE
599	PF3D7_0521400.1o1_8497	-0.014986586	-0.002432302	0.012554284	0.946361175	0.964593506	FALSE
600	PF3D7_0521600.iso1.exon1.amp1_1810	-0.154960754	-0.006830254	0.1481305	0.534317933	0.666260205	FALSE
601	PF3D7_0521700.e1s1_9110	-0.086953799	0.027685005	0.114638804	0.148324694	0.446174939	FALSE
602	PF3D7_0521800.iso1.exon1.amp1_1519	-0.194997198	-0.047836215	0.147160983	0.152644905	0.446174939	FALSE
603	PF3D7_0522400.e3s3_9155	-0.099545596	0.060258863	0.159804459	0.200825097	0.459216362	FALSE
604	PF3D7_0522400.e4s2_8874	-0.103620065	0.025060538	0.128680603	0.348443481	0.541293918	FALSE
605	PF3D7_0522400.e4s3_7140	-0.051843053	0.130733156	0.182576209	0.199652274	0.459216362	FALSE
606	PF3D7_0522500.iso1.exon1.amp1_2655	-0.136704689	0.048592511	0.1852972	0.029862864	0.445590672	FALSE
607	PF3D7_0523100.e2s1_7775	-0.099632725	0.027853724	0.12748645	0.090415586	0.445590672	FALSE
608	PF3D7_0523400.3o3_6752	0.004497581	0.087967024	0.083469444	0.342178036	0.536915061	FALSE
609	PF3D7_0523800.1o1_7352	-0.22077679	-0.017386005	0.203390786	0.27913439	0.494124262	FALSE
610	PF3D7_0524100.iso1.exon1.amp1_509	-0.070480831	0.033463537	0.103944368	0.324974945	0.525286433	FALSE
611	PF3D7_0524100.iso1.exon1.amp2_798	-0.059431268	0.031279742	0.09071101	0.471072209	0.622472419	FALSE
612	PF3D7_0524200.iso1.exon1.amp1_3223	-0.137128685	0.022423281	0.159551966	0.1000834	0.445590672	FALSE
613	PF3D7_0524300.1o1_8762	-0.098421438	0.005264411	0.103685849	0.234507061	0.467595484	FALSE
614	PF3D7_0524400.e1s1_7190	-0.101204933	0.035378111	0.136583043	0.345829432	0.539925238	FALSE
615	PF3D7_0524500.1o1_5233	-0.144145359	-0.06570031	0.078445049	0.693129214	0.784358865	FALSE
616	PF3D7_0524700.1o1_6961	-0.091543213	0.015985011	0.107528224	0.221520917	0.462351789	FALSE
617	PF3D7_0524700_8580	-0.163694266	-0.052942869	0.110751397	0.31593966	0.520982321	FALSE
618	PF3D7_0524800.iso1.exon1.amp1_2188	-0.16552223	0.093745695	0.259267925	0.13128367	0.445590672	FALSE
619	PF3D7_0525000.1o1_7931	-0.144417867	-0.02837766	0.116040207	0.489936091	0.633662731	FALSE
620	PF3D7_0525100.e1s1_4897	-0.10337301	0.02135828	0.12473129	0.308126544	0.514277875	FALSE
621	PF3D7_0525200.iso1.exon1.amp2_3987	-0.028572307	-0.038270885	-0.009698578	0.921080454	0.946394134	FALSE
622	PF3D7_0525300.1o1_6447	-0.190307992	-0.039400078	0.150907914	0.43049974	0.592212074	FALSE
623	PF3D7_0525800.e1s1_6607	0.0241418	-0.002533019	-0.02667482	0.754047293	0.827209941	FALSE
624	PF3D7_0526200.iso2.exon7.amp1_2452	-0.111625978	0.113828426	0.225454404	0.091468023	0.445590672	FALSE
625	PF3D7_0526600.iso1.exon1.amp4_3706	-0.194333464	0.074259594	0.268593058	0.015783559	0.445590672	FALSE
626	PF3D7_0526900.iso1.exon3.amp1_1800	-0.07526338	0.0173072	0.09257058	0.414921087	0.582301301	FALSE
627	PF3D7_0527200.e2s1_8350	-0.076899373	0.030139611	0.107038984	0.61085452	0.722484359	FALSE
628	PF3D7_0527600.6o10_4989	-0.117587215	0.053222195	0.170809411	0.103345241	0.445590672	FALSE
629	PF3D7_0528200.e2s1_7765	-0.104444458	-0.027990721	0.076453738	0.610916696	0.722484359	FALSE
630	PF3D7_0528300.1o1_5292	-0.068789775	-0.017041337	0.051748438	0.554985965	0.681230239	FALSE
631	PF3D7_0528400.4o8_8756	-0.208060915	-0.011951819	0.196109096	0.15322084	0.446174939	FALSE
632	PF3D7_0528500.iso1.exon5.amp1_2948	-0.186240111	-0.038940107	0.147300004	0.122653182	0.445590672	FALSE
633	PF3D7_0529000.1o1_7059	-0.068280259	0.083127346	0.151407605	0.335278398	0.532948202	FALSE
634	PF3D7_0529400.1.e2s1_8277	-0.146553456	0.016233088	0.162786544	0.131184089	0.445590672	FALSE
635	PF3D7_0529400.1.e5s1_7458	-0.155174373	-0.037241491	0.117932882	0.290798976	0.500552689	FALSE
636	PF3D7_0529400.1.e7s1_6001	-0.058580942	0.079036509	0.137617451	0.158759598	0.446174939	FALSE
637	PF3D7_0529700.iso1.exon2.amp1_3636	-0.07180206	0.002747	0.07454906	0.439389783	0.59695306	FALSE
638	PF3D7_0530100.2o2_9005	-0.179735404	0.045259255	0.224994659	0.250080733	0.478165841	FALSE
639	PF3D7_0530900.iso1.exon1.amp1_818	-0.123876011	0.024360526	0.148236537	0.234059632	0.467595484	FALSE
640	PF3D7_0530900.iso1.exon1.amp2_1107	-0.064744012	0.004797539	0.06954155	0.431177363	0.592558205	FALSE
641	PF3D7_0530900.iso1.exon1.amp3_3077	-0.028502243	0.051080847	0.079583091	0.339136559	0.535509936	FALSE
642	PF3D7_0531100.iso1.exon1.amp2_seg2_3774	-0.056322398	-0.013748653	0.042573745	0.626008618	0.732607749	FALSE
643	PF3D7_0531400.iso1.exon1.amp2_1631	-0.081375947	0.053309906	0.134685853	0.293100187	0.502777927	FALSE
644	PF3D7_0532100_6557	-0.026310218	-0.020801606	0.005508612	0.959443439	0.974272022	FALSE
645	PF3D7_0532300.e2s1_9209	-0.094972887	0.060653384	0.155626271	0.165502341	0.450115	FALSE
646	PF3D7_0532400.e1s1_5131	0.008801862	0.040983673	0.032181812	0.831983057	0.884737975	FALSE
647	PF3D7_0532400.e2s1_5163	-0.075576446	0.010823157	0.086399604	0.351634651	0.543338268	FALSE
648	PF3D7_0533100.iso1.exon1.amp1_3129	-0.095418113	0.009500539	0.104918653	0.193308715	0.459106299	FALSE
649	PF3D7_0533100.iso1.exon1.amp2_3418	-0.128081225	0.037174013	0.165255238	0.027338573	0.445590672	FALSE
650	PF3D7_0533100.iso1.exon1.amp3_1389	-0.051949792	-0.050920057	0.001029736	0.984996353	0.989229862	FALSE
651	PF3D7_0600200.iso1.exon1.amp3_1938	-0.117007803	0.030214674	0.147222477	0.195708373	0.459216362	FALSE
652	PF3D7_0600300.iso1.exon1.amp1_1286	-0.264222677	-0.035266506	0.228956171	0.250653414	0.478165841	FALSE
653	PF3D7_0600400.iso1.exon1.amp1_3033	0.007204959	0.023450634	0.016245675	0.911547644	0.939909803	FALSE
654	PF3D7_0600400.iso1.exon2.amp1_1895	-0.094343942	0.046580739	0.140924681	0.005405	0.445590672	FALSE
655	PF3D7_0600500.iso1.exon2.amp1_130	-0.203343043	0.011570931	0.214913974	0.178781676	0.451638999	FALSE
656	PF3D7_0600700.iso1.exon1.amp1_4469	-0.303295766	-0.024405561	0.278890205	0.15728738	0.446174939	FALSE
657	PF3D7_0601000.iso1.exon1.amp1_3293	-0.135250946	0.078170975	0.213421921	0.125305106	0.445590672	FALSE
658	PF3D7_0601200.iso1.exon2.amp1_695	-0.28443476	0.085037198	0.369471959	0.088911228	0.445590672	FALSE
659	PF3D7_0601500.iso1.exon1.amp1_4480	-0.073657411	0.032567864	0.106225275	0.099606673	0.445590672	FALSE
660	PF3D7_0601700.2o2_6415	0.13374865	-0.058594335	-0.192342984	0.131162417	0.445590672	FALSE
661	PF3D7_0602000.iso1.exon1.amp2_4515	-0.207633314	-0.024477535	0.183155778	0.261768778	0.485490386	FALSE
662	PF3D7_0602100.iso1.exon1.amp1_1671	-0.257642582	0.002371046	0.260013628	0.090721385	0.445590672	FALSE
663	PF3D7_0602100.iso1.exon1.amp2_1960	-0.178825977	0.063742566	0.242568543	0.051956899	0.445590672	FALSE
664	PF3D7_0602200.1o3_6695	-0.055356417	-0.007218157	0.048138259	0.751764522	0.825674783	FALSE
665	PF3D7_0602600.iso1.exon3.amp1_4131	0.062428757	-0.006945009	-0.069373766	0.743346443	0.821254305	FALSE
666	PF3D7_0602600.iso1.exon4.amp1_377	-0.112908754	-0.044113166	0.068795588	0.27593894	0.492981527	FALSE
667	PF3D7_0602700.iso1.exon1.amp1_1591	-0.06430254	0.051073661	0.115376201	0.507291314	0.646859865	FALSE
668	PF3D7_0603100.1o1_7881	-0.105732048	0.027483924	0.133215973	0.091280662	0.445590672	FALSE
669	PF3D7_0603300.iso1.exon1.amp1_2181	-0.03972246	0.016197997	0.055920457	0.645242191	0.747010365	FALSE
670	PF3D7_0603800.16o20_7091	0.122686139	0.100122053	-0.022564086	0.860899837	0.902078902	FALSE
671	PF3D7_0604000.iso1.exon1.amp1_1983	-0.120687798	0.061580942	0.18226874	0.387669741	0.562418989	FALSE
672	PF3D7_0604000.iso1.exon1.amp3_760	-0.046203541	0.046740645	0.092944186	0.593919306	0.712906564	FALSE
673	PF3D7_0604100.iso1.exon1.amp2_3651	-0.190662344	0.028404796	0.21906714	0.241099286	0.473087752	FALSE
674	PF3D7_0604500.iso1.exon1.amp3_3986	-0.235415141	0.097490202	0.332905343	0.129999478	0.445590672	FALSE
675	PF3D7_0605000.iso1.exon1.amp1_1561	-0.104182214	0.001453326	0.105635541	0.555490287	0.681230239	FALSE
676	PF3D7_0605500.iso1.exon2.amp1_4494	0.000800498	0.044226946	0.043426448	0.684662208	0.776615223	FALSE
677	PF3D7_0605600.iso1.exon1.amp1_3384	-0.178235459	-0.015131388	0.163104071	0.261174109	0.485309611	FALSE
678	PF3D7_0605600.iso1.exon1.amp2_2481	-0.021575663	-0.017686644	0.003889019	0.965280592	0.977128801	FALSE
679	PF3D7_0605600.iso1.exon4.amp1_4428	-0.096907865	0.034157342	0.131065207	0.201049817	0.459216362	FALSE
680	PF3D7_0606000.iso1.exon1.amp2_2795	-0.159048751	-0.010840481	0.148208271	0.295086387	0.504525749	FALSE
681	PF3D7_0606100.iso1.exon4.amp1_4473	0.039554189	0.031464868	-0.008089321	0.961771328	0.974632022	FALSE
682	PF3D7_0606500.iso1.exon5.amp1_1589	-0.225605073	-0.04152251	0.184082563	0.284726546	0.49680973	FALSE
683	PF3D7_0606600.iso1.exon2.amp1_2254	-0.058432689	0.044806757	0.103239446	0.186425436	0.451638999	FALSE
684	PF3D7_0606700.iso1.exon1.amp1_3408	-0.158814373	0.049879293	0.208693666	0.144231096	0.446174939	FALSE
685	PF3D7_0606800.1o1_4981	-0.101655685	0.040432296	0.142087981	0.178652027	0.451638999	FALSE
686	PF3D7_0607300.2o2_5577	-0.062031096	0.113569678	0.175600773	0.025729957	0.445590672	FALSE
687	PF3D7_0607600.1o5_6489	-0.21776024	0.04468763	0.262447869	0.161479992	0.446174939	FALSE
688	PF3D7_0607700.iso1.exon1.amp2_seg1_2869	-0.128695643	0.071853317	0.200548961	0.12859752	0.445590672	FALSE
689	PF3D7_0608100.iso1.exon1.amp1_4297	-0.095730462	0.017698178	0.113428639	0.336960773	0.534124666	FALSE
690	PF3D7_0608100.iso1.exon1.amp2_2496	-0.077319341	0.060870969	0.13819031	0.350066394	0.541714221	FALSE
691	PF3D7_0608310.iso1.exon3.amp1_440	-0.197522118	0.021571067	0.219093186	0.057672853	0.445590672	FALSE
692	PF3D7_0608400.iso1.exon2.amp1_1521	-0.306642535	-0.070076115	0.236566421	0.272469342	0.492339431	FALSE
693	PF3D7_0608500.2o2_7844	-0.130883488	0.031636377	0.162519865	0.03839152	0.445590672	FALSE
694	PF3D7_0609000.iso1.exon1.amp1_3985	-0.24788255	0.080965193	0.328847742	0.050345066	0.445590672	FALSE
695	PF3D7_0609000.iso1.exon1.amp2_4274	-0.252325393	-0.0822698	0.170055593	0.323862863	0.525020711	FALSE
696	PF3D7_0609300.iso1.exon1.amp1_745	-0.148822298	-0.013899358	0.134922939	0.178705843	0.451638999	FALSE
697	PF3D7_0609900.iso1.exon1.amp2_2850	-0.12643022	0.065312913	0.191743133	0.096582692	0.445590672	FALSE
698	PF3D7_0610000.iso1.exon2.amp1_2117	-0.032637122	-0.022364647	0.010272475	0.862538208	0.903120663	FALSE
699	PF3D7_0610200.1o1_5636	-0.131057037	0.067937711	0.198994748	0.114761642	0.445590672	FALSE
700	PF3D7_0611800.iso1.exon5.amp1_seg1_1151	-0.039277158	0.043003974	0.082281132	0.122451492	0.445590672	FALSE
701	PF3D7_0611800.iso1.exon5.amp3_508	-0.316130164	0.114163687	0.430293852	0.074516363	0.445590672	FALSE
702	PF3D7_0611900.iso1.exon1.amp1_2690	-0.035717423	0.024599852	0.060317275	0.408378446	0.578513685	FALSE
703	PF3D7_0612700.1o1_6423	-0.078546845	-0.032182421	0.046364424	0.644566207	0.746535995	FALSE
704	PF3D7_0613300.iso1.exon3.amp1_635	-0.1190444	-0.045884565	0.073159835	0.349665867	0.541614365	FALSE
705	PF3D7_0613300.iso1.exon5.amp1_2341	-0.159912239	0.013404228	0.173316467	0.057821463	0.445590672	FALSE
706	PF3D7_0613900.iso1.exon1.amp2_2265	-0.134477563	0.071191341	0.205668903	0.073652204	0.445590672	FALSE
707	PF3D7_0614000.iso1.exon1.amp1_157	-0.052778785	-0.018988285	0.0337905	0.630311349	0.735188445	FALSE
708	PF3D7_0614400.1o1_8430	-0.120452827	0.003621196	0.124074024	0.400419242	0.571871068	FALSE
709	PF3D7_0614800.iso1.exon1.amp1_433	-0.206058861	0.02121985	0.22727871	0.186518531	0.451638999	FALSE
710	PF3D7_0615100.1o1_7590	-0.054493787	0.036602416	0.091096203	0.210526403	0.459216362	FALSE
711	PF3D7_0615600.5o8_7086	-0.078689883	0.034611999	0.113301882	0.091976488	0.445590672	FALSE
712	PF3D7_0615800.2o3_6521	-0.088297126	0.01782192	0.106119046	0.178955115	0.451638999	FALSE
713	PF3D7_0616000.1o3_5009	-0.05771848	0.029683952	0.087402432	0.075136056	0.445590672	FALSE
714	PF3D7_0616300.iso1.exon1.amp1_967	-0.153832211	0.003292709	0.15712492	0.369357705	0.555920025	FALSE
715	PF3D7_0616800.iso1.exon1.amp1_2475	-0.014934484	0.017578694	0.032513178	0.706264831	0.794689641	FALSE
716	PF3D7_0617000.1o1_8750	-0.149737915	-0.015956429	0.133781486	0.173005942	0.451638999	FALSE
717	PF3D7_0617400.s3 (renamed)_7396	-0.142979139	0.047686945	0.190666084	0.010405018	0.445590672	FALSE
718	PF3D7_0617600.iso1.exon1.amp1_3292	-0.310084839	0.063214214	0.373299053	0.088613822	0.445590672	FALSE
719	PF3D7_0617700.iso1.exon1.amp1_3596	-0.293024557	-0.04489223	0.248132327	0.184443363	0.451638999	FALSE
720	PF3D7_0618500.1o1_6121	-0.102083322	-0.019301829	0.082781493	0.309139708	0.514344504	FALSE
721	PF3D7_0618700.1o2_6708	-0.104825157	0.024458857	0.129284013	0.219296675	0.461613264	FALSE
722	PF3D7_0618900.2o10_5031	-0.04916659	0.033854939	0.083021529	0.271333454	0.492339431	FALSE
723	PF3D7_0618900.iso2.exon2.amp1_2167	0.027439054	0.101154071	0.073715016	0.665300029	0.762986209	FALSE
724	PF3D7_0619000.1.12o14_6224	-0.20027586	0.07496144	0.2752373	0.024390508	0.445590672	FALSE
725	PF3D7_0619000.1.e12_5382	-0.10627321	0.024011869	0.130285079	0.160788946	0.446174939	FALSE
726	PF3D7_0619000.1.s1 (renamed)_5662	-0.020099537	0.014887455	0.034986992	0.738052624	0.817833798	FALSE
727	PF3D7_0619000.iso2.exon13.amp1_3564	-0.169658329	-0.036855886	0.132802443	0.29544628	0.504831599	FALSE
728	PF3D7_0619400.iso1.exon1.amp1_727	-0.095789344	0.016685617	0.112474961	0.096228545	0.445590672	FALSE
729	PF3D7_0619400.iso1.exon2.amp1_2684	-0.181213495	0.036543507	0.217757002	0.328142532	0.527765992	FALSE
730	PF3D7_0619700.iso1.exon2.amp1_2417	0.048410964	-0.019918754	-0.068329718	0.602459958	0.718238828	FALSE
731	PF3D7_0619900.iso1.exon1.amp1_2419	-0.078092406	0.070225486	0.148317893	0.191709967	0.45788309	FALSE
732	PF3D7_0620000.1o1_5588	-0.075551242	0.004172107	0.079723348	0.439083816	0.59695306	FALSE
733	PF3D7_0620100.2o2_6690	-0.114978395	0.009360218	0.124338612	0.110310868	0.445590672	FALSE
734	PF3D7_0620200.1o1_6128	-0.314469368	-0.059084345	0.255385024	0.231172272	0.466049286	FALSE
735	PF3D7_0620400.1o1_7613	0.053654026	0.048587836	-0.005066191	0.97252981	0.9812438	FALSE
736	PF3D7_0620600.1o1_5842	-0.091137079	0.03180537	0.12294245	0.036506091	0.445590672	FALSE
737	PF3D7_0621200.iso1.exon1.amp1_1855	-0.134591868	0.041446688	0.176038556	0.083527801	0.445590672	FALSE
738	PF3D7_0621400.1o1_8784	-0.129706632	0.118874388	0.248581021	0.022639527	0.445590672	FALSE
739	PF3D7_0621900.1o1_7648	-0.217604408	0.062446556	0.280050964	0.08385332	0.445590672	FALSE
740	PF3D7_0622000.iso1.exon1.amp1_2087	-0.150231265	-0.003600623	0.146630642	0.122756134	0.445590672	FALSE
741	PF3D7_0622000.iso1.exon3.amp1_2970	-0.112369015	0.065108914	0.177477929	0.080573338	0.445590672	FALSE
742	PF3D7_0622100.iso1.exon1.amp1_seg1_3159	-0.129345521	0.022035766	0.151381287	0.11517986	0.445590672	FALSE
743	PF3D7_0622100.iso1.exon1.amp2_seg2_2303	-0.083549824	-0.018270145	0.065279679	0.516755386	0.652174773	FALSE
744	PF3D7_0622800.s1 (renamed)_4799	-0.161951383	0.14482853	0.306779913	0.060961285	0.445590672	FALSE
745	PF3D7_0622800.s2 (renamed)_5666	-0.02858647	0.025428622	0.054015093	0.605994473	0.720920026	FALSE
746	PF3D7_0623300.iso1.exon4.amp1_75	-0.037401712	-0.021688974	0.015712738	0.737532125	0.817730359	FALSE
747	PF3D7_0623400.1o1_5006	-0.086328211	0.038212836	0.124541047	0.254948538	0.479206468	FALSE
748	PF3D7_0623700.iso1.exon1.amp2_4528	-0.149154071	0.028096166	0.177250237	0.185259266	0.451638999	FALSE
749	PF3D7_0623800.iso1.exon1.amp3_470	-0.0933827	0.030762505	0.124145205	0.2203977	0.462225243	FALSE
750	PF3D7_0623900.1o1_5269	-0.009033257	0.090113748	0.099147005	0.509175294	0.647789257	FALSE
751	PF3D7_0624500.iso1.exon1.amp1_1536	-0.109988445	-0.052736495	0.05725195	0.417166284	0.583699731	FALSE
752	PF3D7_0624600.iso1.exon1.amp2_2263	-0.118977064	0.016745545	0.135722608	0.328945535	0.527765992	FALSE
753	PF3D7_0624900.iso1.exon8.amp1_2391	-0.046766657	-0.013091924	0.033674734	0.615362706	0.725600096	FALSE
754	PF3D7_0625000.iso2.exon1.amp1_1527	-0.092090186	-0.053391999	0.038698187	0.783887369	0.847021265	FALSE
755	PF3D7_0625400.1o1_5288	-0.067516259	0.042845784	0.110362043	0.181657545	0.451638999	FALSE
756	PF3D7_0625500.1o1_7006	-0.093366252	-0.000417773	0.092948479	0.286834382	0.497700253	FALSE
757	PF3D7_0625600.1o1_7626	-0.08257604	0.026704947	0.109280986	0.238505444	0.46999174	FALSE
758	PF3D7_0626100.iso1.exon2.amp1_4098	-0.099770029	0.026469755	0.126239783	0.179141379	0.451638999	FALSE
759	PF3D7_0626600.1o1_6969	-0.10437921	0.077742476	0.182121686	0.036141934	0.445590672	FALSE
760	PF3D7_0626800.iso1.exon1.amp1_2938	-0.141635346	-0.014492561	0.127142785	0.243349505	0.475175495	FALSE
761	PF3D7_0626800.iso1.exon2.amp1_1841	-0.162263343	-0.000192704	0.162070638	0.060535508	0.445590672	FALSE
762	PF3D7_0626800.iso1.exon3.amp1_689	-0.292117089	0.009954969	0.302072057	0.0357437	0.445590672	FALSE
763	PF3D7_0626900.1o1_4986	-0.161349419	0.102535815	0.263885234	0.058493383	0.445590672	FALSE
764	PF3D7_0627000.1o1_6672	-0.08566373	0.008129718	0.093793449	0.133140071	0.446174939	FALSE
765	PF3D7_0627100.iso1.exon1.amp1_4595	-0.341664301	0.051267584	0.392931885	0.065877174	0.445590672	FALSE
766	PF3D7_0627400.1o1_5247	-0.18371148	0.010065915	0.193777395	0.124690684	0.445590672	FALSE
767	PF3D7_0628000.1o1_7263	-0.205697068	0.051607177	0.257304244	0.031723973	0.445590672	FALSE
768	PF3D7_0628100.iso1.exon1.amp10_2250	-0.173792294	0.011173937	0.184966231	0.083041452	0.445590672	FALSE
769	PF3D7_0628100.iso1.exon1.amp11_1613	-0.130341642	0.013111773	0.143453415	0.213750331	0.459496777	FALSE
770	PF3D7_0628100.iso1.exon1.amp6_2244	-0.053740332	0.111739234	0.165479566	0.029160213	0.445590672	FALSE
771	PF3D7_0628100.iso1.exon1.amp7_1383	-0.127739962	0.001001287	0.12874125	0.516984547	0.652174773	FALSE
772	PF3D7_0628100.iso1.exon1.amp9_1961	-0.140965859	0.063421871	0.204387729	0.173389071	0.451638999	FALSE
773	PF3D7_0628200.s1_6574	-0.032644627	0.014721345	0.047365971	0.285761235	0.497068551	FALSE
774	PF3D7_0628200.s2 (renamed)_6863	-0.230408037	-0.00330384	0.227104197	0.09594548	0.445590672	FALSE
775	PF3D7_0628600.iso1.exon3.amp1_4371	-0.116158042	-0.023799385	0.092358657	0.19753399	0.459216362	FALSE
776	PF3D7_0629000.iso1.exon1.amp1_120	-0.202442381	0.011845193	0.214287574	0.075755884	0.445590672	FALSE
777	PF3D7_0629300.1o1_7935	-0.136161618	0.038015458	0.174177077	0.209131015	0.459216362	FALSE
778	PF3D7_0629500.1o2_8488	-0.080844637	-0.033213627	0.04763101	0.789990614	0.851143037	FALSE
779	PF3D7_0629600.iso1.exon2.amp1_3286	-0.073874531	-0.005961241	0.067913289	0.465984236	0.617203494	FALSE
780	PF3D7_0629700.s3 (renamed)_7149	-0.131221421	0.017567499	0.148788919	0.340097521	0.536351771	FALSE
781	PF3D7_0629700.s5 (renamed)_7727	-0.075036371	-0.013542968	0.061493403	0.613446382	0.72425417	FALSE
782	PF3D7_0629900.iso1.exon1.amp1_3279	-0.109430096	-0.006687024	0.102743072	0.399176511	0.571358314	FALSE
783	PF3D7_0630300.iso1.exon2.amp3_4257	-0.099445043	-0.009112999	0.090332045	0.550123883	0.678340971	FALSE
784	PF3D7_0630600.2o2_8237	-0.122074962	0.016653359	0.13872832	0.206941772	0.459216362	FALSE
785	PF3D7_0631000.iso1.exon1.amp1_2426	-0.168351413	0.02891888	0.197270293	0.085157802	0.445590672	FALSE
786	PF3D7_0631100.iso1.exon2.amp1_1011	-0.135692754	0.037857492	0.173550246	0.04224157	0.445590672	FALSE
787	PF3D7_0631400.iso1.exon1.amp1_1562	-0.240159382	0.045466718	0.2856261	0.184709987	0.451638999	FALSE
788	PF3D7_0631800.iso1.exon2.amp1_3318	-0.207656774	-0.010074961	0.197581813	0.264930601	0.488482838	FALSE
789	PF3D7_0631900.iso1.exon2.amp1_3298	-0.288662633	0.029282029	0.317944662	0.083770887	0.445590672	FALSE
790	PF3D7_0632000.iso1.exon2.amp1_3020	-0.273222156	-0.004596999	0.268625157	0.171277326	0.451638999	FALSE
791	PF3D7_0632100.iso1.exon1.amp1_705	-0.158488037	0.003107185	0.161595222	0.155909933	0.446174939	FALSE
792	PF3D7_0632200.iso1.exon1.amp1_3015	-0.257620125	0.057817536	0.315437662	0.030249354	0.445590672	FALSE
793	PF3D7_0632300.iso1.exon2.amp1_423	-0.210777378	0.005183851	0.215961229	0.185323201	0.451638999	FALSE
794	PF3D7_0632400.iso1.exon2.amp1_3304	-0.292159456	0.108822878	0.400982334	0.058517712	0.445590672	FALSE
795	PF3D7_0632500.iso1.exon1.amp1_3326	-0.389004109	0.102702592	0.491706701	0.030192018	0.445590672	FALSE
796	PF3D7_0632500.iso1.exon2.amp1_1064	-0.158008041	-0.007835325	0.150172716	0.044888992	0.445590672	FALSE
797	PF3D7_0632500.iso1.exon2.amp3_492	-0.060226606	0.007174259	0.067400865	0.542607003	0.671730701	FALSE
798	PF3D7_0632500.iso1.exon2.amp4_seg2_4605	-0.057287442	0.057668817	0.114956259	0.186159728	0.451638999	FALSE
799	PF3D7_0632700.iso1.exon2.amp1_2437	-0.22770747	0.070718504	0.298425974	0.12968339	0.445590672	FALSE
800	PF3D7_0632800.iso1.exon1.amp1_4482	-0.237408473	0.060331735	0.297740208	0.005791829	0.445590672	FALSE
801	PF3D7_0700100.iso1.exon3.amp1_1301	-0.272466132	-0.002612447	0.269853685	0.057415877	0.445590672	FALSE
802	PF3D7_0700200.iso1.exon3.amp1_994	-0.175448592	0.015600288	0.191048879	0.077539022	0.445590672	FALSE
803	PF3D7_0700300.iso1.exon3.amp1_3589	-0.093572098	-0.060130082	0.033442015	0.748133477	0.823622406	FALSE
804	PF3D7_0700400.iso1.exon3.amp1_4165	-0.207731927	0.025358508	0.233090435	0.127026091	0.445590672	FALSE
805	PF3D7_0700500.iso1.exon3.amp1_2741	-0.262135759	0.069844865	0.331980625	0.092218193	0.445590672	FALSE
806	PF3D7_0701000.1o1_5806	-0.16588267	0.086448513	0.252331183	0.021454853	0.445590672	FALSE
807	PF3D7_0701100.iso1.exon3.amp1_2151	-0.374704837	0.09590501	0.470609847	0.029994842	0.445590672	FALSE
808	PF3D7_0701600.iso1.exon2.amp1_4435	-0.229442664	0.0413991	0.270841764	0.157594811	0.446174939	FALSE
809	PF3D7_0701800.iso1.exon1.amp1_3301	-0.265333184	0.062229299	0.327562483	0.031621287	0.445590672	FALSE
810	PF3D7_0701900.e2s1_9111	-0.034818846	0.077292439	0.112111285	0.127784104	0.445590672	FALSE
811	PF3D7_0702200.1o1_5873	-0.145914841	0.041351491	0.187266332	0.066941033	0.445590672	FALSE
812	PF3D7_0702300.2o2_7331	0.010324612	0.007129267	-0.003195345	0.987487906	0.990313337	FALSE
813	PF3D7_0702300.e2_6828	-0.068980292	0.008347173	0.077327464	0.427495504	0.590584238	FALSE
814	PF3D7_0702400.e1s1_8040	-0.224496037	0.01711347	0.241609507	0.27666417	0.49298223	FALSE
815	PF3D7_0702500.e1s1_8598	-0.137079981	-0.036640377	0.100439604	0.326820778	0.526367296	FALSE
816	PF3D7_0702600.iso1.exon1.amp1_3842	-0.072233939	-0.064342178	0.00789176	0.941266153	0.96114723	FALSE
817	PF3D7_0703100.1o1_5246	-0.223611182	0.046122494	0.269733676	0.165012779	0.449219255	FALSE
818	PF3D7_0703200.iso1.exon1.amp1_4307	-0.012085343	0.059096593	0.071181937	0.623790102	0.731232209	FALSE
819	PF3D7_0703300.iso1.exon1.amp1_3572	-0.036143112	0.036236953	0.072380064	0.387414854	0.562418989	FALSE
820	PF3D7_0703500.e2s2_7503	-0.254597648	0.066370895	0.320968543	0.156437862	0.446174939	FALSE
821	PF3D7_0703700.e1s1_8629	-0.213382707	-0.035561532	0.177821175	0.477310329	0.625518203	FALSE
822	PF3D7_0704000.iso1.exon1.amp1_seg1_3736	-0.159575505	-0.012715077	0.146860429	0.389362125	0.562923739	FALSE
823	PF3D7_0704200.iso1.exon1.amp1_252	-0.062515439	0.012332855	0.074848294	0.452571999	0.604569342	FALSE
824	PF3D7_0704200.iso1.exon1.amp2_769	-0.149216219	-0.053028057	0.096188162	0.518208499	0.652472668	FALSE
825	PF3D7_0704300.s1_6860	-0.135631849	0.022784184	0.158416033	0.078564074	0.445590672	FALSE
826	PF3D7_0704500.iso1.exon1.amp2_178	-0.126854645	-0.021561475	0.10529317	0.377283881	0.559441567	FALSE
827	PF3D7_0704600.iso1.exon5.amp3_seg1_283	-0.108745885	0.027917343	0.136663229	0.395211316	0.568512552	FALSE
828	PF3D7_0704800.iso1.exon1.amp1_3430	-0.054736516	0.137067532	0.191804048	0.28324981	0.495475768	FALSE
829	PF3D7_0704800.iso1.exon1.amp2_1629	-0.118225083	0.106194269	0.224419352	0.20622898	0.459216362	FALSE
830	PF3D7_0704900.iso1.exon1.amp1_3311	-0.139812556	0.095649403	0.235461959	0.053875867	0.445590672	FALSE
831	PF3D7_0705000.e1s1_7991	-0.158161948	0.079080521	0.237242469	0.014667471	0.445590672	FALSE
832	PF3D7_0705000.e1s2_6251	-0.008321858	0.029728598	0.038050457	0.570511625	0.693372444	FALSE
833	PF3D7_0705500.iso1.exon2.amp2_3383	-0.166206728	0.00640245	0.172609177	0.204205907	0.459216362	FALSE
834	PF3D7_0705500.iso1.exon2.amp3_1354	-0.189987798	-0.005939571	0.184048227	0.066394618	0.445590672	FALSE
835	PF3D7_0705600.iso1.exon1.amp2_4245	-0.114303767	0.028132779	0.142436546	0.517433002	0.652174773	FALSE
836	PF3D7_0706500.iso1.exon1.amp1_3144	-0.128451806	0.001168268	0.129620074	0.409071889	0.578513685	FALSE
837	PF3D7_0706700.1o1_8234	-0.139714735	0.022943064	0.162657799	0.261058802	0.485309611	FALSE
838	PF3D7_0707200.iso1.exon1.amp1_1982	-0.034886179	0.018528293	0.053414472	0.36374259	0.550720423	FALSE
839	PF3D7_0707300.2o5_6209	-0.049218492	0.017881918	0.067100409	0.564790475	0.690956584	FALSE
840	PF3D7_0707400.iso1.exon1.amp1_1310	-0.129067776	0.110894641	0.239962417	0.263459391	0.486974378	FALSE
841	PF3D7_0707500.iso1.exon1.amp2_467	-0.139017042	0.016547942	0.155564984	0.171533688	0.451638999	FALSE
842	PF3D7_0707700.1o1_5353	-0.281170976	0.012457336	0.293628312	0.15283985	0.446174939	FALSE
843	PF3D7_0708000.e1s1_9235	-0.115969331	0.064495518	0.180464849	0.062189291	0.445590672	FALSE
844	PF3D7_0708000.e2s1_8905	-0.10474894	0.055513009	0.160261949	0.037320307	0.445590672	FALSE
845	PF3D7_0708400.e1_5679	-0.050319867	0.051292136	0.101612003	0.134811658	0.446174939	FALSE
846	PF3D7_0708400.e2_6536	-0.075977183	0.009519062	0.085496245	0.072329314	0.445590672	FALSE
847	PF3D7_0709000.e3s1_5972	-0.090761671	0.046952134	0.137713804	0.199456542	0.459216362	FALSE
848	PF3D7_0709100.e1s1_4890	-0.167691523	0.083129883	0.250821406	0.089163215	0.445590672	FALSE
849	PF3D7_0709300.iso1.exon1.amp3_2493	-0.066071005	-0.005377862	0.060693143	0.647237846	0.749011523	FALSE
850	PF3D7_0709400.iso1.exon2.amp1_2171	-0.205344295	0.010272311	0.215616605	0.358100289	0.545713702	FALSE
851	PF3D7_0709700.e1s1_7479	-0.050450763	0.061687063	0.112137826	0.512998139	0.650586514	FALSE
852	PF3D7_0709900.3o3_8531	-0.095631114	-0.006480176	0.089150939	0.274817713	0.49270388	FALSE
853	PF3D7_0709900.e1s2_8563	-0.18532958	0.019147676	0.204477256	0.120374543	0.445590672	FALSE
854	PF3D7_0709900.e2_7429	-0.014060606	0.034631054	0.04869166	0.724022176	0.8077868	FALSE
855	PF3D7_0709900.e3_5674	-0.047804719	0.020094965	0.067899684	0.403066898	0.57316437	FALSE
856	PF3D7_0710200.iso1.exon1.amp2_seg1_3742	-0.108663104	-0.080415638	0.028247466	0.807278586	0.865956066	FALSE
857	PF3D7_0710200.iso1.exon1.amp3_3649	-0.092826425	0.041226085	0.134052511	0.462126338	0.613252368	FALSE
858	PF3D7_0710300.iso1.exon2.amp1_2630	-0.101475053	0.005996433	0.107471486	0.225458442	0.463802224	FALSE
859	PF3D7_0710400_9160	-0.320327558	0.047873532	0.36820109	0.098011829	0.445590672	FALSE
860	PF3D7_0710500.iso1.exon5.amp1_1229	0.035135945	-0.016909776	-0.052045721	0.408321714	0.578513685	FALSE
861	PF3D7_0711000.e1s1_7491	-0.004915012	0.011638179	0.016553191	0.892479545	0.928231786	FALSE
862	PF3D7_0711000.e1s2_8942	-0.02035969	0.017914378	0.038274067	0.788112687	0.849949221	FALSE
863	PF3D7_0711100.iso1.exon1.amp1_1552	-0.232857917	-0.02002634	0.212831577	0.148775425	0.446174939	FALSE
864	PF3D7_0711200.iso1.exon1.amp1_2331	-0.030563435	0.019390553	0.049953988	0.604525375	0.72039488	FALSE
865	PF3D7_0711300.iso1.exon1.amp1_3846	-0.19904327	0.043802357	0.242845627	0.064871997	0.445590672	FALSE
866	PF3D7_0711700.e2s1_5452	-0.10685585	0.055234453	0.162090303	0.085139233	0.445590672	FALSE
867	PF3D7_0712000.iso1.exon1.amp1_145	-0.186707798	0.040358457	0.227066255	0.109155445	0.445590672	FALSE
868	PF3D7_0712300.iso1.exon1.amp1_3615	-0.1906908	0.105929707	0.296620507	0.028751314	0.445590672	FALSE
869	PF3D7_0712400.iso1.exon1.amp1_1004	-0.129094632	0.014073313	0.143167946	0.245469578	0.475696555	FALSE
870	PF3D7_0712400.iso1.exon2.amp2_2529	-0.116296111	0.014731469	0.13102758	0.411884713	0.579781494	FALSE
871	PF3D7_0712600.iso1.exon1.amp1_434	-0.200887122	0.007757916	0.208645038	0.067472527	0.445590672	FALSE
872	PF3D7_0712800.iso1.exon1.amp1_3904	-0.128038396	0.064869026	0.192907422	0.039110934	0.445590672	FALSE
873	PF3D7_0712800.iso1.exon2.amp2_1944	-0.109171341	0.024359583	0.133530923	0.358952302	0.546121679	FALSE
874	PF3D7_0712900.iso1.exon1.amp1_3316	-0.261889755	0.053403973	0.315293728	0.101598542	0.445590672	FALSE
875	PF3D7_0712900.iso1.exon2.amp2_215	-0.080207615	0.001009151	0.081216767	0.485713102	0.630535709	FALSE
876	PF3D7_0713000.iso1.exon2.amp1_2451	-0.064481261	0.02014506	0.084626321	0.255020131	0.479206468	FALSE
877	PF3D7_0713100.2o2_5537	-0.07365398	-0.00509446	0.068559519	0.435098211	0.593970489	FALSE
878	PF3D7_0713600.iso1.exon1.amp1_3623	-0.129490198	0.011232886	0.140723084	0.309659737	0.514396408	FALSE
879	PF3D7_0713900.e1s1_5647	-0.091136524	0.006220952	0.097357476	0.568270451	0.693362011	FALSE
880	PF3D7_0713900.e1s3_8249	-0.23574348	0.104032259	0.339775738	0.057955581	0.445590672	FALSE
881	PF3D7_0713900.e1s4_5937	-0.224677275	0.02472127	0.249398546	0.150511654	0.446174939	FALSE
882	PF3D7_0714000.e1s1_6579	-0.112457119	0.015911028	0.128368148	0.163293915	0.446178312	FALSE
883	PF3D7_0714200.iso1.exon1.amp2_463	-0.200414939	0.045264697	0.245679637	0.161327268	0.446174939	FALSE
884	PF3D7_0715000.1o1_5833	-0.030165009	0.022383865	0.052548874	0.519092288	0.652999002	FALSE
885	PF3D7_0715300.1o3_4714	-0.05974561	0.010800655	0.070546264	0.262480942	0.486254208	FALSE
886	PF3D7_0715600.1o1_6202	-0.076128829	-0.000625426	0.075503403	0.386282781	0.562418989	FALSE
887	PF3D7_0715800.1o1_6729	-0.10531194	0.210176656	0.315488596	0.018371282	0.445590672	FALSE
888	PF3D7_0716200.1o1_8223	-0.130108136	-0.012824347	0.117283789	0.444497527	0.599505082	FALSE
889	PF3D7_0716300.e1s1_8921	-0.152277567	0.085045797	0.237323364	0.117197064	0.445590672	FALSE
890	PF3D7_0717000.iso1.exon2.amp1_1484	-0.103507989	-0.024145871	0.079362118	0.351853874	0.543338268	FALSE
891	PF3D7_0717200.1o2_8169	-0.175621649	-0.032198456	0.143423193	0.157628388	0.446174939	FALSE
892	PF3D7_0717300.1o4_7894	-0.146116593	0.054914665	0.201031258	0.028643815	0.445590672	FALSE
893	PF3D7_0717500.e1s1_5155	-0.215305701	-0.03560059	0.179705112	0.374671382	0.556951425	FALSE
894	PF3D7_0717700.e1s1_9221	0.013002919	0.043956447	0.030953528	0.705233444	0.794485567	FALSE
895	PF3D7_0718000.e11s1_8030	-0.101338929	0.022594285	0.123933215	0.197937028	0.459216362	FALSE
896	PF3D7_0718000.e4s1_4866	-0.142942228	0.073651059	0.216593287	0.047913778	0.445590672	FALSE
897	PF3D7_0718000.e5s1_8036	-0.101461876	0.037731969	0.139193845	0.112632122	0.445590672	FALSE
898	PF3D7_0718000.e9s3_8251	-0.100136496	0.053250638	0.153387134	0.216235516	0.460244033	FALSE
899	PF3D7_0718000.e9s4_5939	-0.101256678	0.075627623	0.1768843	0.087138098	0.445590672	FALSE
900	PF3D7_0718100.iso1.exon1.amp2_1370	-0.096910995	-0.015110976	0.081800019	0.325533717	0.525286433	FALSE
901	PF3D7_0718300.e5s1_8050	-0.12421505	0.085301778	0.209516828	0.216935659	0.460244033	FALSE
902	PF3D7_0718300.e7s1_4783	-0.107369983	0.091959298	0.199329281	0.092306867	0.445590672	FALSE
903	PF3D7_0718600.iso1.exon6.amp1_3617	-0.080277281	0.013464816	0.093742097	0.447773222	0.602185187	FALSE
904	PF3D7_0718600.iso1.exon8.amp1_4159	-0.086207154	0.004314195	0.090521349	0.496923526	0.637991559	FALSE
905	PF3D7_0718800.iso1.exon4.amp1_3221	-0.144964176	0.020714157	0.165678332	0.044723672	0.445590672	FALSE
906	PF3D7_0719000.1o1_5524	-0.026114726	0.069301004	0.09541573	0.621445465	0.730020272	FALSE
907	PF3D7_0719100.iso1.exon2.amp1_947	-0.154413817	0.040633347	0.195047163	0.356090621	0.54506478	FALSE
908	PF3D7_0719200.e1s1_7415	-0.069371865	0.013154999	0.082526864	0.382110832	0.561806006	FALSE
909	PF3D7_0719200.e9s1_8565	-0.160228486	-0.073097979	0.087130508	0.35644294	0.54506478	FALSE
910	PF3D7_0719400.s1_5695	-0.043845189	0.031127245	0.074972435	0.380258915	0.5608869	FALSE
911	PF3D7_0719500.1o2_8186	-0.039406765	0.012632591	0.052039356	0.670898023	0.766080918	FALSE
912	PF3D7_0719500.2o2_9047	-0.073000191	0.070786087	0.143786278	0.074866635	0.445590672	FALSE
913	PF3D7_0719600.e2_5954	-0.051904775	-0.010963453	0.040941322	0.61509588	0.725600096	FALSE
914	PF3D7_0719700 (renamed)_9040	-0.246507588	-0.019835448	0.22667214	0.298722467	0.50644154	FALSE
915	PF3D7_0719700.e3s1_7128	-0.060045681	0.006042431	0.066088112	0.209770056	0.459216362	FALSE
916	PF3D7_0721000.iso1.exon1.amp1_1958	-0.259408857	0.030438232	0.289847089	0.268982218	0.491280943	FALSE
917	PF3D7_0721000.iso1.exon1.amp2_2247	-0.332493201	0.022734074	0.355227275	0.141204444	0.446174939	FALSE
918	PF3D7_0721100_5690	-0.184745776	0.076435168	0.261180945	0.060467952	0.445590672	FALSE
919	PF3D7_0721600.e2s1_4856	-0.064760116	0.084132066	0.148892182	0.063526112	0.445590672	FALSE
920	PF3D7_0721700_4819	-0.066518272	0.098784784	0.165303056	0.035744415	0.445590672	FALSE
921	PF3D7_0722600.e1s1_6051	-0.126937149	0.055003525	0.181940674	0.070135163	0.445590672	FALSE
922	PF3D7_0722800.1o1_5891	0.046358055	0.134170011	0.087811956	0.671550249	0.766080918	FALSE
923	PF3D7_0723000.iso1.exon1.amp1_3306	-0.080881094	0.037453137	0.118334232	0.411122172	0.578998779	FALSE
924	PF3D7_0723200.e4s1_7754	-0.081027254	0.01770697	0.098734225	0.235550296	0.467595484	FALSE
925	PF3D7_0723400.e1s2_6637	-0.219073962	0.051997953	0.271071915	0.103936795	0.445590672	FALSE
926	PF3D7_0723500_4823	-0.09143582	0.094309484	0.185745304	0.05011574	0.445590672	FALSE
927	PF3D7_0723700.iso1.exon1.amp2_1934	-0.000547818	0.029995682	0.0305435	0.801052988	0.860924714	FALSE
928	PF3D7_0723800.iso1.exon1.amp3_2230	-0.063182857	0.002894949	0.066077806	0.615832808	0.725849177	FALSE
929	PF3D7_0723800.iso1.exon2.amp1_2646	-0.305891709	-0.001639887	0.304251822	0.075644272	0.445590672	FALSE
930	PF3D7_0723900.e1s2_5176	-0.040054938	0.061204934	0.101259871	0.493021429	0.635893324	FALSE
931	PF3D7_0724300.iso1.exon1.amp1_112	-0.062024736	-0.0057985	0.056226236	0.473116758	0.624291478	FALSE
932	PF3D7_0724400.iso1.exon1.amp1_2105	-0.045285868	0.007933116	0.053218984	0.464266566	0.615509907	FALSE
933	PF3D7_0724700.e2s2_8380	-0.277812291	0.029497417	0.307309708	0.121678842	0.445590672	FALSE
934	PF3D7_0725100.e1s1_5471	-0.104533741	-0.022037803	0.082495938	0.38709426	0.562418989	FALSE
935	PF3D7_0725200.iso1.exon3.amp1_3844	-0.074901706	-0.028311167	0.046590539	0.355196997	0.54506478	FALSE
936	PF3D7_0726100.2o2_6782	-0.027908408	0.097147264	0.125055672	0.070634218	0.445590672	FALSE
937	PF3D7_0726200.iso1.exon2.amp1_1023	-0.072149818	0.057873304	0.130023121	0.176736159	0.451638999	FALSE
938	PF3D7_0726400.e1s1_6882	-0.072395229	0.044249703	0.116644932	0.096748589	0.445590672	FALSE
939	PF3D7_0726400.e1s3_8538	-0.107779923	0.004082123	0.111862046	0.347594577	0.541057444	FALSE
940	PF3D7_0726400.e2s1_8610	-0.10487685	0.033255917	0.138132767	0.073898519	0.445590672	FALSE
941	PF3D7_0726400.e2s2_9247	0.026339443	0.035631084	0.009291641	0.918385733	0.944317417	FALSE
942	PF3D7_0726400.e3s1_8933	-0.111724971	0.003625016	0.115349988	0.328425586	0.527765992	FALSE
943	PF3D7_0726400.e6s1_8651	-0.148864313	0.049129463	0.197993775	0.2212658	0.462351789	FALSE
944	PF3D7_0726400.e6s2_4899	0.015941905	0.136732898	0.120790993	0.469751412	0.621019782	FALSE
945	PF3D7_0726500.iso1.exon4.amp1_3386	-0.098708211	0.042871606	0.141579816	0.19075342	0.457271053	FALSE
946	PF3D7_0726500.iso1.exon4.amp2_2525	0.033509497	-0.015556533	-0.04906603	0.568487612	0.693362011	FALSE
947	PF3D7_0726600.1o2_6479	-0.221321143	-0.064834522	0.15648662	0.381100189	0.561379967	FALSE
948	PF3D7_0727000.iso1.exon1.amp1_1996	-0.071942614	0.058386785	0.130329399	0.000736814	0.445590672	FALSE
949	PF3D7_0727200.1o1_6756	-0.061420702	0.114364752	0.175785454	0.044698024	0.445590672	FALSE
950	PF3D7_0727800.iso1.exon1.amp1_4594	-0.038178004	-0.001024804	0.0371532	0.756864168	0.828261914	FALSE
951	PF3D7_0727900.e1s2_5080	-0.136165358	0.024299999	0.160465358	0.15111138	0.446174939	FALSE
952	PF3D7_0728000.e2_6530	-0.255922926	-0.018696129	0.237226797	0.081302724	0.445590672	FALSE
953	PF3D7_0728200.2o2_7918	0.08866337	0.06522735	-0.02343602	0.919697535	0.945319607	FALSE
954	PF3D7_0728300.iso1.exon1.amp1_984	-0.028589003	-0.000235469	0.028353534	0.578216104	0.698242014	FALSE
955	PF3D7_0728600.iso1.exon1.amp1_205	-0.108974985	0.001481305	0.11045629	0.139880788	0.446174939	FALSE
956	PF3D7_0728600.iso1.exon3.amp1_2396	0.010019688	0.309141427	0.299121738	0.143615284	0.446174939	FALSE
957	PF3D7_0728700.iso1.exon3.amp1_1258	-0.113409711	-0.05335591	0.060053802	0.475964304	0.625107218	FALSE
958	PF3D7_0728800.iso1.exon1.amp1_4481	-0.020803783	0.045283001	0.066086784	0.693167357	0.784358865	FALSE
959	PF3D7_0729500.iso1.exon1.amp1_1884	-0.04683499	-0.037387361	0.009447629	0.913058668	0.940564477	FALSE
960	PF3D7_0729700.iso1.exon2.amp1_1872	-0.121974829	0.054364637	0.176339466	0.012009507	0.445590672	FALSE
961	PF3D7_0729800.iso1.exon1.amp1_365	-0.155882426	0.00604872	0.161931147	0.066751814	0.445590672	FALSE
962	PF3D7_0729900.e1s1_5072	-0.030054251	0.043295988	0.073350239	0.421118539	0.58688687	FALSE
963	PF3D7_0730000.iso1.exon1.amp1_348	-0.075893901	-0.010278782	0.065615119	0.311900365	0.517496227	FALSE
964	PF3D7_0730300.e1s1_5186	-0.226404735	0.003209867	0.229614602	0.23594902	0.467595484	FALSE
965	PF3D7_0730300.e1s2_5758	-0.105559523	0.087435434	0.192994957	0.188619158	0.455153286	FALSE
966	PF3D7_0730500.e1s3_7387	0.000672243	0.005459671	0.004787427	0.958142923	0.973770481	FALSE
967	PF3D7_0730800.1.e2s1_5161	0.055461789	-0.036561072	-0.092022861	0.633112382	0.736006268	FALSE
968	PF3D7_0730800.iso2.exon2.amp1_1557	-0.063703	0.024517892	0.088220891	0.514031034	0.650719196	FALSE
969	PF3D7_0730900.e1s1_8316	-0.081582998	-0.024188342	0.057394656	0.668845788	0.76548718	FALSE
970	PF3D7_0730900.e2s1_8659	-0.121988556	-0.030928753	0.091059803	0.21412381	0.459726771	FALSE
971	PF3D7_0731100.2o2_6789	-0.068533209	0.048642564	0.117175773	0.312850077	0.518458401	FALSE
972	PF3D7_0731200.2o2_8439	-0.164290365	0.063530905	0.22782127	0.285129924	0.497068551	FALSE
973	PF3D7_0731500.s1 (renamed)_7684	0.072792139	0.116069656	0.043277517	0.756547803	0.828261914	FALSE
974	PF3D7_0731500.s2 (renamed)_7112	-0.03107063	0.018132189	0.04920282	0.750081279	0.824795258	FALSE
975	PF3D7_0731600.e1s1_6357	-0.039738952	0.029079029	0.068817981	0.679294903	0.773342634	FALSE
976	PF3D7_0732000.iso1.exon2.amp1_690	-0.226490419	0.039688015	0.266178434	0.0985793	0.445590672	FALSE
977	PF3D7_0732200.iso1.exon2.amp1_1297	-0.241616166	-0.014605512	0.227010655	0.356456268	0.54506478	FALSE
978	PF3D7_0732300.iso1.exon1.amp1_4175	-0.249361875	0.200764847	0.450126722	0.097121285	0.445590672	FALSE
979	PF3D7_0732400.iso1.exon1.amp1_2443	-0.108377421	-0.030638831	0.077738589	0.521891621	0.655156058	FALSE
980	PF3D7_0732500.iso1.exon1.amp1_135	-0.040813994	-0.012256202	0.028557792	0.814420843	0.870951962	FALSE
981	PF3D7_0732700.iso1.exon2.amp1_712	-0.238383898	0.056065718	0.294449616	0.206311202	0.459216362	FALSE
982	PF3D7_0732900.iso1.exon2.amp1_996	-0.185762414	0.167828056	0.35359047	0.037406569	0.445590672	FALSE
983	PF3D7_0733000.iso1.exon1.amp1_3621	-0.225212945	-0.010870655	0.21434229	0.049587488	0.445590672	FALSE
984	PF3D7_0733000.iso1.exon2.amp3_1942	-0.137748387	0.046156184	0.183904571	0.083127858	0.445590672	FALSE
985	PF3D7_0800100.iso1.exon1.amp1_723	-0.225302537	-0.014256006	0.211046532	0.095301913	0.445590672	FALSE
986	PF3D7_0800100.iso1.exon2.amp1_3980	-0.075251544	-0.012040101	0.063211442	0.18308247	0.451638999	FALSE
987	PF3D7_0800100.iso1.exon2.amp2_4269	-0.032442452	0.036443081	0.068885532	0.38638015	0.562418989	FALSE
988	PF3D7_0800200.e1s1_8827	-0.099824333	0.016641219	0.116465552	0.288590663	0.498999882	FALSE
989	PF3D7_0800200.e1s2_5359	-0.10451319	0.093059035	0.197572225	0.067232313	0.445590672	FALSE
990	PF3D7_0800200.e2s1_5745	0.011444242	0.081423321	0.069979079	0.55512351	0.681230239	FALSE
991	PF3D7_0800300.e1s3_8831	-0.180023187	-0.01504458	0.164978607	0.111501597	0.445590672	FALSE
992	PF3D7_0800300.e2s1_8914	-0.046696413	0.052464292	0.099160705	0.422936676	0.588543146	FALSE
993	PF3D7_0800400.iso1.exon3.amp1_128	-0.151394445	0.024368681	0.175763126	0.175226183	0.451638999	FALSE
994	PF3D7_0800500.iso1.exon2.amp1_3888	-0.241199379	0.023544912	0.264744292	0.145963127	0.446174939	FALSE
995	PF3D7_0800700.e1s1_6606	-0.080119272	0.016043643	0.096162915	0.236081266	0.467595484	FALSE
996	PF3D7_0800700.e3s1_5772	-0.043269159	0.039524226	0.082793385	0.341491822	0.536613947	FALSE
997	PF3D7_0801000.e2s1_5460	-0.014199774	-0.036718828	-0.022519054	0.83935123	0.889135191	FALSE
998	PF3D7_0801000.e2s2_6911	-0.005866664	0.05284627	0.058712933	0.519692663	0.653461088	FALSE
999	PF3D7_0801600.1o1_8124	-0.171405139	-0.039105556	0.132299583	0.241082914	0.473087752	FALSE
1000	PF3D7_0801700.1o3_5645	-0.04117359	0.006713124	0.047886714	0.588964165	0.707564489	FALSE
1001	PF3D7_0801800_4835	-0.102126559	0.053203591	0.15533015	0.205038791	0.459216362	FALSE
1002	PF3D7_0801900.iso1.exon1.amp5_1622	-0.110213873	0.036470753	0.146684627	0.168548936	0.451638999	FALSE
1003	PF3D7_0802000.e1s1_5197	-0.212407732	0.049563702	0.261971434	0.110343306	0.445590672	FALSE
1004	PF3D7_0802000.e1s2_6642	-0.035725248	0.028658157	0.064383405	0.65058872	0.752268359	FALSE
1005	PF3D7_0802300.iso1.exon1.amp1_1413	-0.030022136	-0.010971219	0.019050917	0.874277098	0.91370592	FALSE
1006	PF3D7_0802300.iso1.exon1.amp2_1927	-0.059041083	0.149533255	0.208574338	0.018807522	0.445590672	FALSE
1007	PF3D7_0802600.iso1.exon3.amp1_1656	-0.017333633	-0.021163654	-0.003830021	0.964936952	0.977128801	FALSE
1008	PF3D7_0802600.iso1.exon6.amp1_2681	-0.036609903	0.055832144	0.092442047	0.060139837	0.445590672	FALSE
1009	PF3D7_0802800.2o2_8482	-0.076050726	-0.018508629	0.057542097	0.658069604	0.757793499	FALSE
1010	PF3D7_0803200.iso1.exon1.amp1_3327	-0.07802674	-0.011168107	0.066858632	0.384366555	0.562418989	FALSE
1011	PF3D7_0803400.iso1.exon1.amp1_4581	-0.282464005	-0.003260963	0.279203042	0.235764661	0.467595484	FALSE
1012	PF3D7_0803400.iso1.exon1.amp2_3948	-0.248373721	0.003967009	0.252340729	0.065640008	0.445590672	FALSE
1013	PF3D7_0804000.iso1.exon1.amp1_4456	-0.138771983	0.094805877	0.23357786	0.054846717	0.445590672	FALSE
1014	PF3D7_0804000.iso1.exon2.amp1_3276	-0.069408194	0.047288095	0.116696289	0.126743223	0.445590672	FALSE
1015	PF3D7_0804500.e1s1_5404	-0.101379352	-0.017903559	0.083475793	0.508907484	0.647742436	FALSE
1016	PF3D7_0804500.e2s2_5372	-0.097293197	0.021599802	0.118892999	0.193164957	0.459106299	FALSE
1017	PF3D7_0804500.e2s3_4800	-0.02758391	0.025806514	0.053390424	0.526150577	0.658425141	FALSE
1018	PF3D7_0804500.e3_7398	-0.14375275	0.062492108	0.206244858	0.068203603	0.445590672	FALSE
1019	PF3D7_0804600.1o1_6746	-0.216198223	0.034522356	0.250720579	0.162991054	0.446174939	FALSE
1020	PF3D7_0804800.e1s1_5442	-0.109841641	-0.017385689	0.092455952	0.206268775	0.459216362	FALSE
1021	PF3D7_0804900.1o1_6159	-0.234484618	-0.056458341	0.178026277	0.236132384	0.467595484	FALSE
1022	PF3D7_0805100.iso1.exon1.amp1_3626	-0.023591991	-0.062856928	-0.039264937	0.49383258	0.636061807	FALSE
1023	PF3D7_0805300.iso1.exon1.amp2_1057	-0.025297953	-0.020871356	0.004426598	0.960199987	0.974272022	FALSE
1024	PF3D7_0805400.1o6_8716	-0.094847355	0.015418621	0.110265976	0.299479861	0.50644154	FALSE
1025	PF3D7_0805700.iso1.exon1.amp2_3399	-0.082310286	0.052777103	0.13508739	0.185210609	0.451638999	FALSE
1026	PF3D7_0806000.iso1.exon1.amp2_515	-0.150256144	-0.01053384	0.139722303	0.611477633	0.722842868	FALSE
1027	PF3D7_0806200.10o10_8244	-0.176296918	0.048040696	0.224337614	0.035311069	0.445590672	FALSE
1028	PF3D7_0806300.iso1.exon1.amp1_485	-0.105468944	-0.000207338	0.105261606	0.331960104	0.529775829	FALSE
1029	PF3D7_0806300.iso1.exon2.amp1_3830	0.000580789	0.1207897	0.120208911	0.434044875	0.593386111	FALSE
1030	PF3D7_0806500.e1s1_5475	-0.007413839	-0.043001374	-0.035587536	0.779661469	0.84412425	FALSE
1031	PF3D7_0806600.e2s1_5153	-0.135087177	0.02613486	0.161222038	0.033333571	0.445590672	FALSE
1032	PF3D7_0806600.e3s1_8038	-0.130141042	0.07634475	0.206485791	0.094063131	0.445590672	FALSE
1033	PF3D7_0806600.e5s1_5749	-0.004885273	-6.89E-05	0.004816395	0.946279388	0.964593506	FALSE
1034	PF3D7_0806700.iso1.exon1.amp1_1804	-0.156533549	-0.069110721	0.087422828	0.388063409	0.562418989	FALSE
1035	PF3D7_0806700.iso1.exon3.amp3_1358	-0.042428275	0.002030193	0.044458468	0.428652096	0.591215188	FALSE
1036	PF3D7_0806800.e1s1_8932	-0.057350836	0.059936881	0.117287717	0.439290184	0.59695306	FALSE
1037	PF3D7_0806900.iso1.exon1.amp1_704	-0.088076167	0.056065857	0.144142024	0.104694706	0.445590672	FALSE
1038	PF3D7_0807100.iso1.exon1.amp2_3363	-0.083536799	-0.006333579	0.07720322	0.432510703	0.592808915	FALSE
1039	PF3D7_0807700.1o5_5328	-0.073763249	0.08691062	0.160673869	0.015557335	0.445590672	FALSE
1040	PF3D7_0807700.5o5_5617	-0.12361293	0.05728028	0.18089321	0.091331164	0.445590672	FALSE
1041	PF3D7_0807800.e2s1_6602	-0.238157347	-0.056405544	0.181751803	0.252548113	0.479108298	FALSE
1042	PF3D7_0808100.iso1.exon2.amp1_3829	-0.088235942	-0.007199667	0.081036275	0.318135956	0.520982321	FALSE
1043	PF3D7_0808100.iso1.exon3.amp1_3963	-0.232573412	-0.006120202	0.22645321	0.047560319	0.445590672	FALSE
1044	PF3D7_0808200.e1s1_9217	-0.034104579	0.035710045	0.069814624	0.63259891	0.735714369	FALSE
1045	PF3D7_0808400.1o1_4673	-0.126517975	0.036158999	0.162676974	0.128533966	0.445590672	FALSE
1046	PF3D7_0808600.e1s2_6520	0.000118803	0.015661737	0.015542934	0.806130077	0.865386193	FALSE
1047	PF3D7_0808600.e2s1_8343	-0.188854949	-0.024198936	0.164656013	0.111138426	0.445590672	FALSE
1048	PF3D7_0808700.iso1.exon1.amp1_3035	-0.203416437	-0.025489174	0.177927263	0.255401839	0.479348565	FALSE
1049	PF3D7_0808700.iso1.exon2.amp1_2238	-0.082276868	0.021390881	0.103667748	0.062778754	0.445590672	FALSE
1050	PF3D7_0808800.iso1.exon1.amp1_3594	-0.211836572	-0.072719712	0.13911686	0.495173629	0.636327614	FALSE
1051	PF3D7_0808900.iso1.exon1.amp1_4458	-0.183248862	0.003259533	0.186508395	0.273504976	0.492339431	FALSE
1052	PF3D7_0809100.iso1.exon1.amp1_4184	-0.154941254	0.019355556	0.174296809	0.145493133	0.446174939	FALSE
1053	PF3D7_0809100.iso1.exon2.amp1_1077	-0.052033147	0.044811172	0.096844319	0.147293013	0.446174939	FALSE
1054	PF3D7_0809100.iso1.exon2.amp2_seg2_2600	-0.037706708	0.041467133	0.079173841	0.149488065	0.446174939	FALSE
1055	PF3D7_0809200.e1s2_6342	-0.230632185	0.012297045	0.242929231	0.20413701	0.459216362	FALSE
1056	PF3D7_0809500.iso1.exon1.amp1_3552	-0.066171646	0.024072882	0.090244528	0.316085105	0.520982321	FALSE
1057	PF3D7_0809600.iso1.exon1.amp4_seg1_2308	-0.004493268	0.024969053	0.029462321	0.838691201	0.88908086	FALSE
1058	PF3D7_0809900.iso1.exon1.amp1_seg2_287	-0.270677961	0.018963677	0.289641638	0.13524922	0.446174939	FALSE
1059	PF3D7_0809900.iso1.exon1.amp2_seg2_576	-0.245067616	-0.024798053	0.220269563	0.247366676	0.475696555	FALSE
1060	PF3D7_0810300.2o4_8207	-0.075333982	0.007787533	0.083121515	0.428164675	0.590979183	FALSE
1061	PF3D7_0810800.e2s1_9231	-0.161535019	0.099751289	0.261286308	0.033178182	0.445590672	FALSE
1062	PF3D7_0810900.1.1o2_7001	-0.086774431	0.068019454	0.154793885	0.040783024	0.445590672	FALSE
1063	PF3D7_0811600.e2s1_6045	-0.060874105	0.055109693	0.115983798	0.072248966	0.445590672	FALSE
1064	PF3D7_0811600.e2s2_7207	-0.151981126	0.031005312	0.182986439	0.247622898	0.475696555	FALSE
1065	PF3D7_0812100.e1s1_5364	-0.090947782	0.029841003	0.120788785	0.357457649	0.54506478	FALSE
1066	PF3D7_0812400.e1s1_6614	-0.105934702	0.015157543	0.121092245	0.213376071	0.459216362	FALSE
1067	PF3D7_0812600.iso1.exon2.amp1_4140	0.008038813	0.066266839	0.058228026	0.515719787	0.651680164	FALSE
1068	PF3D7_0812700.1o1_7561	-0.070864754	0.061392828	0.132257582	0.078372923	0.445590672	FALSE
1069	PF3D7_0812900.2o2_8824	-0.089391238	0.039076728	0.128467966	0.047284087	0.445590672	FALSE
1070	PF3D7_0813400.e2s1_6043	-0.121867128	-0.037256296	0.084610832	0.624933379	0.731654779	FALSE
1071	PF3D7_0813700.iso1.exon1.amp2_2781	-0.122814524	0.059801635	0.182616158	0.069631545	0.445590672	FALSE
1072	PF3D7_0813900.e2s1_8892	-0.085702793	0.006565939	0.092268732	0.299313456	0.50644154	FALSE
1073	PF3D7_0814600.e1s1_5462	-0.167341514	0.049885752	0.217227266	0.127296307	0.445590672	FALSE
1074	PF3D7_0815100.iso1.exon1.amp1_2474	-0.048051025	0.030895474	0.078946499	0.405485433	0.576270225	FALSE
1075	PF3D7_0815300.iso1.exon1.amp1_4308	-0.051131397	0.068255521	0.119386918	0.109117217	0.445590672	FALSE
1076	PF3D7_0815300.iso1.exon1.amp2_seg1_2595	-0.052530139	0.005530678	0.058060817	0.553183445	0.679989071	FALSE
1077	PF3D7_0815400.e1s1_8889	-0.067618718	0.025422354	0.093041072	0.289782113	0.499415516	FALSE
1078	PF3D7_0815500.3o5_7032	-0.160838701	0.029330609	0.190169309	0.15229383	0.446174939	FALSE
1079	PF3D7_0816100.1o4_7264	-0.18062061	0.056366624	0.236987234	0.082956085	0.445590672	FALSE
1080	PF3D7_0816200.1o1_6682	-0.225347526	-0.001042793	0.224304734	0.167805191	0.451638999	FALSE
1081	PF3D7_0816500.e2s1_4845	-0.021855744	0.048822112	0.070677856	0.135425997	0.446174939	FALSE
1082	PF3D7_0816600.e1s1_6325	-0.032933562	0.025292138	0.0582257	0.443015845	0.598407245	FALSE
1083	PF3D7_0816700.iso1.exon3.amp1_4095	-0.219123084	-0.006376807	0.212746278	0.145174638	0.446174939	FALSE
1084	PF3D7_0817300.e1s3_7500	-0.002809036	0.022185714	0.02499475	0.895802204	0.930518342	FALSE
1085	PF3D7_0817700.iso1.exon14.amp1_1790	-0.167408373	-0.039569925	0.127838447	0.289076751	0.499307703	FALSE
1086	PF3D7_0817700.iso1.exon15.amp1_2691	-0.102728343	0.024737139	0.127465482	0.072460191	0.445590672	FALSE
1087	PF3D7_0818500.e2_5381	-0.123871391	0.024166284	0.148037676	0.369889917	0.555973899	FALSE
1088	PF3D7_0818900_4784	-0.082858938	0.114925237	0.197784175	0.168289972	0.451638999	FALSE
1089	PF3D7_0819600.2o2_6409	-0.13841839	0.068667713	0.207086103	0.045235789	0.445590672	FALSE
1090	PF3D7_0819800.e4s1_8607	-0.130735899	-0.117918183	0.012817716	0.876069781	0.914556838	FALSE
1091	PF3D7_0820600.3o3_6147	-0.111460712	-0.062508443	0.048952269	0.539537306	0.670235953	FALSE
1092	PF3D7_0821000.1o5_7907	-0.059854092	0.065674854	0.125528946	0.156638738	0.446174939	FALSE
1093	PF3D7_0821300.iso1.exon1.amp1_3317	-0.104786917	0.031050235	0.135837152	0.035280466	0.445590672	FALSE
1094	PF3D7_0821300.iso1.exon3.amp1_3898	-0.072414397	0.011017178	0.083431574	0.425778582	0.590002459	FALSE
1095	PF3D7_0821500.1o1_8442	-0.199418463	0.015443837	0.2148623	0.107627138	0.445590672	FALSE
1096	PF3D7_0821600.1o1_4738	-0.106951222	0.062020797	0.168972019	0.078000982	0.445590672	FALSE
1097	PF3D7_0822600.e2s1_7209	-0.19868229	0.060362592	0.259044882	0.051488568	0.445590672	FALSE
1098	PF3D7_0823300 (renamed, has duplicates)_6432	0.077396411	0.027080891	-0.05031552	0.810578202	0.868233006	FALSE
1099	PF3D7_0823300.e1s1_7488	-0.303955696	0.041567749	0.345523445	0.204035448	0.459216362	FALSE
1100	PF3D7_0823300.e1s2_7199	-0.20423849	0.071183779	0.275422269	0.095778723	0.445590672	FALSE
1101	PF3D7_0823500.1o1_5877	-0.061421825	0.194517024	0.255938848	0.166302514	0.451415536	FALSE
1102	PF3D7_0823800_6524	-0.094814087	-0.040093831	0.054720255	0.300321569	0.506503126	FALSE
1103	PF3D7_0823900.1o1_8440	-0.225684312	-0.052110025	0.173574287	0.226557999	0.464090844	FALSE
1104	PF3D7_0824200.iso1.exon2.amp1_seg1_3174	-0.052655591	-0.027208163	0.025447428	0.724236404	0.8077868	FALSE
1105	PF3D7_0824200.iso1.exon2.amp2_seg1_3463	-0.154025831	0.026803077	0.180828908	0.080362164	0.445590672	FALSE
1106	PF3D7_0824600.1o5_8431	-0.07532974	0.009666224	0.084995964	0.318821093	0.52127307	FALSE
1107	PF3D7_0824700.iso1.exon16.amp1_3245	-0.269092496	0.02766966	0.296762157	0.162263873	0.446174939	FALSE
1108	PF3D7_0825200.iso1.exon1.amp1_2065	-0.090768366	0.014491795	0.105260161	0.073498561	0.445590672	FALSE
1109	PF3D7_0825200.iso1.exon4.amp1_4086	-0.040234443	-0.047440658	-0.007206215	0.899953709	0.93331544	FALSE
1110	PF3D7_0825600.iso1.exon1.amp1_3549	-0.006714399	-0.005156414	0.001557984	0.991152388	0.992922935	FALSE
1111	PF3D7_0825800.iso1.exon1.amp1_1307	0.011649754	0.021242902	0.009593148	0.952286742	0.968520865	FALSE
1112	PF3D7_0826000.iso1.exon1.amp2_3371	-0.010878182	0.043883065	0.054761247	0.618248138	0.727472841	FALSE
1113	PF3D7_0826100.s1_5414	-0.179197541	0.027308885	0.206506426	0.299153115	0.50644154	FALSE
1114	PF3D7_0826100.s2_5703	-0.345490177	0.056156842	0.401647019	0.040518239	0.445590672	FALSE
1115	PF3D7_0826100.s3_8299	-0.206205555	0.014659408	0.220864963	0.106039128	0.445590672	FALSE
1116	PF3D7_0826100.s4_8588	-0.106831841	-0.021493251	0.085338591	0.36819386	0.554763881	FALSE
1117	PF3D7_0826100.s8_8594	-0.250371849	-0.135247161	0.115124688	0.445338442	0.600350477	FALSE
1118	PF3D7_0826300.1o1_6730	-0.170506995	0.070301867	0.240808861	0.075562524	0.445590672	FALSE
1119	PF3D7_0826400.iso1.exon6.amp1_665	-0.109563486	-0.020353609	0.089209877	0.384008833	0.562277163	FALSE
1120	PF3D7_0826500.e1s1_5469	-0.088741643	0.104924215	0.193665859	0.212866535	0.459216362	FALSE
1121	PF3D7_0826500.e1s2_5180	-0.060378086	-0.050939231	0.009438855	0.974445076	0.981798058	FALSE
1122	PF3D7_0826700.e2_6241	-0.127558123	0.007060033	0.134618156	0.209692203	0.459216362	FALSE
1123	PF3D7_0827100.s2_5089	-0.008081862	0.05082831	0.058910172	0.681825207	0.775061276	FALSE
1124	PF3D7_0827600.2o2_6223	-0.222898163	0.100457924	0.323356087	0.04968572	0.445590672	FALSE
1125	PF3D7_0827800.e1s1_6935	-0.032339999	0.048041456	0.080381455	0.426601037	0.590584238	FALSE
1126	PF3D7_0827800.e1s3_6929	-0.138488605	-0.033605865	0.10488274	0.481039828	0.626928012	FALSE
1127	PF3D7_0827900.e2_7119	-0.128571794	0.033138928	0.161710721	0.154206869	0.446174939	FALSE
1128	PF3D7_0828100.iso1.exon3.amp1_1012	0.009308702	0.070029622	0.06072092	0.630610645	0.735231704	FALSE
1129	PF3D7_0828200.iso1.exon1.amp2_1624	-0.037488793	0.063529374	0.101018168	0.34451591	0.539376109	FALSE
1130	PF3D7_0828400.1o1_8192	-0.104841574	-0.008090176	0.096751399	0.449939751	0.603651226	FALSE
1131	PF3D7_0828500.4o4_8157	-0.185476766	-0.036519626	0.148957141	0.217239158	0.460244033	FALSE
1132	PF3D7_0829000.e2s1_7406	-0.161886446	-0.039086215	0.122800231	0.511990942	0.649897058	FALSE
1133	PF3D7_0829600.1o1_8708	-0.04075474	-0.048176035	-0.007421294	0.909082897	0.938537719	FALSE
1134	PF3D7_0830600.2o2_6153	-0.15678331	-0.097982411	0.058800899	0.555948638	0.681328663	FALSE
1135	PF3D7_0830800.iso1.exon1.amp1_1373	0.004848608	0.035995372	0.031146765	0.715729744	0.802106145	FALSE
1136	PF3D7_0830800.iso1.exon1.amp2_4505	-0.084811546	0.064164868	0.148976413	0.143742316	0.446174939	FALSE
1137	PF3D7_0830800.iso1.exon2.amp1_1892	-0.057947373	0.058978449	0.116925822	0.109698949	0.445590672	FALSE
1138	PF3D7_0831100.iso1.exon1.amp2_3348	-0.07693809	-0.007716576	0.069221514	0.536904149	0.668507652	FALSE
1139	PF3D7_0831100.iso1.exon2.amp1_4116	0.00294223	0.224971848	0.222029618	0.107029643	0.445590672	FALSE
1140	PF3D7_0831200.iso1.exon1.amp1_2190	-0.198459545	0.034000737	0.232460282	0.074498076	0.445590672	FALSE
1141	PF3D7_0831300.2o2_7356	0.093762892	-0.036033012	-0.129795904	0.567382272	0.69291807	FALSE
1142	PF3D7_0831400.2o2_8450	0.041573479	-0.051138423	-0.092711902	0.597229856	0.715349216	FALSE
1143	PF3D7_0831500.iso1.exon2.amp1_2951	-0.03469481	0.001866755	0.036561565	0.851684215	0.897287637	FALSE
1144	PF3D7_0831500.iso1.exon3.amp1_1846	-0.065083585	0.013024372	0.078107956	0.427535489	0.590584238	FALSE
1145	PF3D7_0831700.2o2_5026	-0.022476533	0.072014712	0.094491245	0.683663345	0.776280474	FALSE
1146	PF3D7_0831800.2o2_5849	0.014615334	0.044600072	0.029984739	0.802040454	0.861655721	FALSE
1147	PF3D7_0832000.iso1.exon3.amp1_1848	-0.172715241	0.028145443	0.200860684	0.087914491	0.445590672	FALSE
1148	PF3D7_0832300.2o2_7858	-0.070732832	-0.006666597	0.064066235	0.442255299	0.598407245	FALSE
1149	PF3D7_0832400.iso1.exon3.amp1_1853	-0.264458804	0.081676678	0.346135482	0.187808974	0.453588599	FALSE
1150	PF3D7_0832800.iso1.exon3.amp1_1854	-0.26955935	0.025980294	0.295539644	0.05614608	0.445590672	FALSE
1151	PF3D7_0832900.iso1.exon3.amp1_986	-0.309596101	0.058592573	0.368188674	0.124820996	0.445590672	FALSE
1152	PF3D7_0833000.iso1.exon3.amp1_3881	-0.322433173	0.042172409	0.364605582	0.144905885	0.446174939	FALSE
1153	PF3D7_0833100.iso1.exon3.amp1_4170	-0.36239203	0.036956321	0.399348352	0.062671558	0.445590672	FALSE
1154	PF3D7_0833200.iso1.exon3.amp1_3030	-0.172577986	0.019406327	0.191984314	0.154219942	0.446174939	FALSE
1155	PF3D7_0833300.iso1.exon1.amp1_1870	-0.043885862	0.059558363	0.103444225	0.479780329	0.626581664	FALSE
1156	PF3D7_0833400.iso1.exon3.amp1_4185	-0.100607464	0.016534177	0.117141641	0.092524362	0.445590672	FALSE
1157	PF3D7_0833500.iso1.exon3.amp1_3614	-0.207753986	0.047373704	0.255127689	0.050623996	0.445590672	FALSE
1158	PF3D7_0900100.iso1.exon2.amp1_151	-0.253644238	-0.019370235	0.234274003	0.090502059	0.445590672	FALSE
1159	PF3D7_0900200.e2s1_8924	-0.298953827	0.024168992	0.323122819	0.052581358	0.445590672	FALSE
1160	PF3D7_0900300.iso1.exon1.amp1_1001	-0.171248179	-0.001978488	0.169269691	0.155452026	0.446174939	FALSE
1161	PF3D7_0900400.iso1.exon2.amp1_1867	-0.087701456	0.019842425	0.107543882	0.04916756	0.445590672	FALSE
1162	PF3D7_0900500.iso1.exon1.amp1_4464	-0.244248678	0.080027866	0.324276544	0.088615183	0.445590672	FALSE
1163	PF3D7_0900600.iso1.exon1.amp1_424	-0.243720366	0.032450261	0.276170626	0.125986853	0.445590672	FALSE
1164	PF3D7_0900700.iso1.exon1.amp1_2726	-0.224938986	0.027752024	0.25269101	0.142517041	0.446174939	FALSE
1165	PF3D7_0900900.iso1.exon1.amp1_4454	-0.307169912	0.053850394	0.361020307	0.073864692	0.445590672	FALSE
1166	PF3D7_0901000.iso1.exon1.amp1_3010	-0.179582037	0.060202381	0.239784418	0.084195176	0.445590672	FALSE
1167	PF3D7_0901100.iso1.exon1.amp1_3608	-0.151755385	-0.003660109	0.148095275	0.159475801	0.446174939	FALSE
1168	PF3D7_0901300.iso1.exon2.amp1_1859	-0.180999607	0.004143008	0.185142615	0.185591871	0.451638999	FALSE
1169	PF3D7_0901400.iso1.exon2.amp1_711	-0.123958163	0.00974479	0.133702953	0.0156475	0.445590672	FALSE
1170	PF3D7_0901500.iso1.exon2.amp1_4476	-0.287764422	0.073946747	0.361711169	0.080128122	0.445590672	FALSE
1171	PF3D7_0901600.iso1.exon2.amp1_1269	-0.340124927	-0.039739162	0.300385765	0.229349483	0.465674113	FALSE
1172	PF3D7_0901800.2o2_8725	0.020641628	0.040625508	0.01998388	0.873535665	0.913271441	FALSE
1173	PF3D7_0902200.2o3_7910	-0.250356282	0.082433352	0.332789635	0.072012461	0.445590672	FALSE
1174	PF3D7_0902300.2o3_7037	-0.044295455	0.07259346	0.116888915	0.120975036	0.445590672	FALSE
1175	PF3D7_0902400.iso1.exon2.amp1_1014	-0.067907299	0.053967027	0.121874325	0.087931484	0.445590672	FALSE
1176	PF3D7_0902600.2o3_8194	-0.029769509	0.035062938	0.064832448	0.762897344	0.832359592	FALSE
1177	PF3D7_0902800.2o4_7652	0.000973157	0.198987699	0.198014542	0.512890672	0.650586514	FALSE
1178	PF3D7_0902800.4o4_7941	-0.087207269	0.196031648	0.283238918	0.048224808	0.445590672	FALSE
1179	PF3D7_0902900.1o1_8123	-0.106096458	0.081732877	0.187829334	0.303052853	0.508838442	FALSE
1180	PF3D7_0903000.1o1_9002	-0.044610342	0.028040774	0.072651116	0.335837718	0.533534822	FALSE
1181	PF3D7_0903000_5973	-0.0228485	0.079432707	0.102281207	0.21585711	0.460244033	FALSE
1182	PF3D7_0903300.iso1.exon1.amp3_3123	0.007735823	0.023099954	0.015364131	0.857709775	0.900755884	FALSE
1183	PF3D7_0903300.iso1.exon1.amp4_1038	0.059854414	-0.048172636	-0.108027051	0.641307844	0.743376269	FALSE
1184	PF3D7_0903400.e1s3_8886	-0.096616932	0.109417057	0.206033989	0.120365854	0.445590672	FALSE
1185	PF3D7_0903500.e1s1_7220	-0.261515671	0.09563517	0.35715084	0.160572293	0.446174939	FALSE
1186	PF3D7_0903500.e1s2_7214	0.038370975	0.140138773	0.101767798	0.617675645	0.727409706	FALSE
1187	PF3D7_0903700.e3s1_4884	-0.166012397	0.094861298	0.260873695	0.047380815	0.445590672	FALSE
1188	PF3D7_0903800.iso1.exon2.amp1_1662	-0.140420505	-0.007364544	0.13305596	0.168753124	0.451638999	FALSE
1189	PF3D7_0903800.iso1.exon2.amp2_3644	-0.141460816	-0.134109377	0.007351439	0.970629532	0.981048593	FALSE
1190	PF3D7_0904900.e1s1_8018	-0.052427911	0.080897956	0.133325867	0.018231721	0.445590672	FALSE
1191	PF3D7_0904900.e1s3_6567	-0.092668354	0.023970949	0.116639303	0.372740657	0.556516845	FALSE
1192	PF3D7_0905100.iso1.exon2.amp1_4406	-0.081280374	0.090088068	0.171368442	0.241334079	0.473217312	FALSE
1193	PF3D7_0905100.iso1.exon3.amp1_1647	-0.178031038	0.048086584	0.226117622	0.137149439	0.446174939	FALSE
1194	PF3D7_0905300.s5_9157	-0.020496613	0.035729191	0.056225804	0.66943245	0.765846018	FALSE
1195	PF3D7_0905300.s6_8296	-0.03121911	-0.087393465	-0.056174355	0.624345119	0.73157698	FALSE
1196	PF3D7_0905300.s7_8001	-0.132265536	0.04547048	0.177736016	0.066369516	0.445590672	FALSE
1197	PF3D7_0905400.e7s1_7466	-0.042680203	0.028557105	0.071237308	0.595976483	0.714514617	FALSE
1198	PF3D7_0905600.2o2_5648	-0.108496181	0.025852166	0.134348348	0.06119682	0.445590672	FALSE
1199	PF3D7_0905900.iso1.exon1.amp1_3487	-0.052167312	-0.054348413	-0.0021811	0.971969592	0.9812438	FALSE
1200	PF3D7_0905900.iso1.exon1.amp2_seg1_1439	-0.059595506	-0.011212426	0.04838308	0.518591522	0.652661862	FALSE
1201	PF3D7_0906200.1o1_7631	-0.181055986	-0.074558843	0.106497143	0.574252249	0.695428773	FALSE
1202	PF3D7_0906300.1o1_4700	-0.047644212	0.073302887	0.120947099	0.352240114	0.543338268	FALSE
1203	PF3D7_0906400.e1s1_9120	-0.209633109	0.038364593	0.247997702	0.060213953	0.445590672	FALSE
1204	PF3D7_0906500.1o1_4999	-0.301217082	0.074113353	0.375330435	0.144419686	0.446174939	FALSE
1205	PF3D7_0906900.1o2_5563	-0.046875905	0.001523407	0.048399313	0.503638575	0.643959218	FALSE
1206	PF3D7_0907200.e1s2_8934	-0.170195989	0.073271441	0.24346743	0.070119872	0.445590672	FALSE
1207	PF3D7_0907600.iso1.exon2.amp1_4206	-0.072516727	0.057710693	0.13022742	0.325135811	0.525286433	FALSE
1208	PF3D7_0907700.e1s1_8630	-0.089521528	0.105318017	0.194839545	0.079881749	0.445590672	FALSE
1209	PF3D7_0908200.iso1.exon2.amp1_4259	-0.022047854	0.00892376	0.030971615	0.601201844	0.717348924	FALSE
1210	PF3D7_0908300.iso2.exon2.amp1_3507	-0.007885567	-0.000775502	0.007110065	0.938307648	0.958824579	FALSE
1211	PF3D7_0908400.2o2_5815	-0.054874165	-0.017626917	0.037247248	0.753630386	0.827076165	FALSE
1212	PF3D7_0908500.e15s1_7738	-0.069441914	0.142723708	0.212165622	0.161650351	0.446174939	FALSE
1213	PF3D7_0908500.e17s1_8622	-0.116358625	0.01628368	0.132642305	0.052800443	0.445590672	FALSE
1214	PF3D7_0908500.e4s1_8616	-0.157177466	-0.037946275	0.119231191	0.25259954	0.479108298	FALSE
1215	PF3D7_0908700.iso1.exon6.amp1_4386	-0.031004873	-0.00511411	0.025890763	0.508110453	0.647315634	FALSE
1216	PF3D7_0909100.1o1_4745	-0.052198248	0.072072057	0.124270305	0.076827636	0.445590672	FALSE
1217	PF3D7_0909500_5686	0.045155817	0.085237168	0.040081351	0.85613169	0.899772585	FALSE
1218	PF3D7_0909600.3o3_8193	-0.148495474	-0.017933039	0.130562436	0.14865308	0.446174939	FALSE
1219	PF3D7_0909700.iso1.exon1.amp1_1703	-0.208180365	-0.124377137	0.083803228	0.541306759	0.670417029	FALSE
1220	PF3D7_0909900.iso1.exon1.amp1_1689	-0.114137887	0.087429245	0.201567132	0.04330654	0.445590672	FALSE
1221	PF3D7_0909900.iso1.exon1.amp2_2197	-0.081069131	0.053656503	0.134725634	0.424100245	0.58914914	FALSE
1222	PF3D7_0910000.iso1.exon1.amp2_1355	-0.063000553	-0.036189198	0.026811355	0.617999891	0.727472841	FALSE
1223	PF3D7_0910200.iso1.exon1.amp1_1395	-0.118468535	0.009582871	0.128051406	0.30402784	0.50956011	FALSE
1224	PF3D7_0910400.iso1.exon1.amp2_seg1_2878	-0.029929222	0.057773896	0.087703118	0.372803951	0.556516845	FALSE
1225	PF3D7_0910400.iso1.exon1.amp2_seg2_864	-0.090443925	0.033154294	0.12359822	0.214426835	0.459923447	FALSE
1226	PF3D7_0910900.iso1.exon2.amp1_3342	0.123252508	-0.008844496	-0.132097004	0.382686619	0.561932526	FALSE
1227	PF3D7_0911100.e1s1_9127	-0.174343284	0.026889051	0.201232335	0.171705121	0.451638999	FALSE
1228	PF3D7_0911300.e1s2_8013	-0.245907524	-0.035877173	0.21003035	0.279066208	0.494124262	FALSE
1229	PF3D7_0911900.2o2_4716	-0.159967664	-0.06137314	0.098594524	0.435818749	0.594664609	FALSE
1230	PF3D7_0911900.e2_7125	-0.239546352	0.024885666	0.264432018	0.076116388	0.445590672	FALSE
1231	PF3D7_0912500.2o7_6421	0.01042503	0.038486468	0.028061438	0.709962514	0.797250656	FALSE
1232	PF3D7_0912600.iso1.exon1.amp1_741	-0.086124314	0.002620518	0.088744832	0.509999844	0.648380965	FALSE
1233	PF3D7_0912600.iso1.exon2.amp1_4466	-0.020395997	-0.027934641	-0.007538644	0.923778515	0.948471239	FALSE
1234	PF3D7_0912800.1o1_8778	-0.153663513	0.115429651	0.269093164	0.237255818	0.4684967	FALSE
1235	PF3D7_0912900.e2s1_6018	-0.104822753	0.034363846	0.1391866	0.169957944	0.451638999	FALSE
1236	PF3D7_0913500.3o3_7012	-0.116408816	0.01299335	0.129402166	0.080111152	0.445590672	FALSE
1237	PF3D7_0914000.1o1_7665	-0.108185649	0.050221235	0.158406884	0.14052586	0.446174939	FALSE
1238	PF3D7_0914100.iso1.exon1.amp1_2279	-0.123650771	0.060551463	0.184202234	0.027778588	0.445590672	FALSE
1239	PF3D7_0914200.3o4_7023	-0.073369531	0.046979276	0.120348807	0.212186371	0.459216362	FALSE
1240	PF3D7_0914800.1o1_6098	-0.13701314	-0.04988478	0.087128359	0.403095627	0.57316437	FALSE
1241	PF3D7_0915300.iso1.exon1.amp1_149	-0.066586993	0.016746114	0.083333107	0.451191677	0.603878347	FALSE
1242	PF3D7_0915400.e1s1_6348	-0.191039183	0.037861963	0.228901146	0.246135412	0.475696555	FALSE
1243	PF3D7_0916200.iso1.exon1.amp1_2352	-0.068773316	0.037006968	0.105780284	0.091386823	0.445590672	FALSE
1244	PF3D7_0916200.iso1.exon2.amp1_2241	-0.134121789	-0.028036018	0.106085771	0.211461272	0.459216362	FALSE
1245	PF3D7_0916200.iso1.exon2.amp2_1904	-0.037187289	-0.010155801	0.027031489	0.619444503	0.728269345	FALSE
1246	PF3D7_0916700.e1s1_6618	-0.138475453	-0.06530913	0.073166323	0.540842578	0.670417029	FALSE
1247	PF3D7_0916800.iso1.exon1.amp1_3204	-0.122265422	0.003729114	0.125994536	0.257247609	0.481523562	FALSE
1248	PF3D7_0917000.iso1.exon1.amp2_1923	-0.23925547	0.039607479	0.27886295	0.087191075	0.445590672	FALSE
1249	PF3D7_0917200.2o2_4677	-0.085647245	0.043771311	0.129418556	0.385387338	0.562418989	FALSE
1250	PF3D7_0917300.1o1_6428	-0.017696441	-0.064886996	-0.047190555	0.666553735	0.764111477	FALSE
1251	PF3D7_0917500.e1s1_7508	-0.070177576	0.034544495	0.104722071	0.189268375	0.455627108	FALSE
1252	PF3D7_0917900.e2_8279	-0.101375523	0.040510611	0.141886135	0.323650711	0.525020711	FALSE
1253	PF3D7_0918000.e1s1_8347	-0.179264697	0.046619246	0.225883943	0.055479232	0.445590672	FALSE
1254	PF3D7_0918300.e2s1_6599	-0.360434988	0.08577099	0.446205978	0.132363102	0.446174939	FALSE
1255	PF3D7_0918900.e1s1_7198	-0.037274342	0.104367396	0.141641739	0.400587926	0.571871068	FALSE
1256	PF3D7_0918900.e1s2_7481	-0.123868331	0.022056733	0.145925064	0.102181338	0.445590672	FALSE
1257	PF3D7_0919200.iso1.exon1.amp1_389	-0.105211686	0.005221918	0.110433604	0.130765711	0.445590672	FALSE
1258	PF3D7_0919400.e1s1_4873	-0.091520115	0.063098902	0.154619018	0.078711949	0.445590672	FALSE
1259	PF3D7_0919800.iso1.exon1.amp1_3111	-0.11432176	0.004475788	0.118797547	0.372437412	0.556516845	FALSE
1260	PF3D7_0919800.iso1.exon1.amp2_seg1_1133	-0.165110994	0.014810021	0.179921015	0.302428829	0.50809493	FALSE
1261	PF3D7_0919900.iso1.exon1.amp1_1105	-0.14068926	-0.202348022	-0.061658762	0.741525073	0.819888132	FALSE
1262	PF3D7_0919900.iso1.exon1.amp4_1035	-0.008103941	0.037384996	0.045488937	0.510443704	0.648380965	FALSE
1263	PF3D7_0920300.1o4_5819	-0.185924545	0.090309888	0.276234433	0.077738053	0.445590672	FALSE
1264	PF3D7_0920400.s1_5698	-0.03943677	0.008771046	0.048207816	0.608623615	0.72159857	FALSE
1265	PF3D7_0920800.e1s1_4875	-0.12512608	0.048993382	0.174119462	0.037458166	0.445590672	FALSE
1266	PF3D7_0920900.iso1.exon2.amp1_3864	-0.201740344	-0.044504285	0.157236059	0.138521119	0.446174939	FALSE
1267	PF3D7_0921200.2o6_8242	-0.084363789	-0.009400988	0.074962802	0.261043819	0.485309611	FALSE
1268	PF3D7_0921400.e1_5664	-0.102080664	0.04886162	0.150942284	0.199165767	0.459216362	FALSE
1269	PF3D7_0921800.1o3_8466	-0.05585365	-0.031882504	0.023971146	0.841178419	0.890397995	FALSE
1270	PF3D7_0922100.e1s2_8955	-0.126004537	-0.008610091	0.117394446	0.575455327	0.696407742	FALSE
1271	PF3D7_0922200.e1s1_7191	-0.14077214	0.044894416	0.185666556	0.125739704	0.445590672	FALSE
1272	PF3D7_0922500_7709	-0.023704711	0.048141758	0.071846469	0.468167541	0.619510044	FALSE
1273	PF3D7_0922800.iso1.exon4.amp3_229	-0.145788907	0.011589878	0.157378786	0.371635562	0.556516845	FALSE
1274	PF3D7_0923800.1.e1s1_7487	0.013344319	0.016334391	0.002990072	0.980074971	0.986285507	FALSE
1275	PF3D7_0923800.iso2.exon1.amp1_446	-0.114563751	-0.006900304	0.107663447	0.286254098	0.497119783	FALSE
1276	PF3D7_0924000.iso1.exon1.amp1_3692	0.121106171	-0.012677092	-0.133783263	0.402917204	0.57316437	FALSE
1277	PF3D7_0924000.iso1.exon1.amp2_3981	-0.057835935	0.05004467	0.107880605	0.475313872	0.625107218	FALSE
1278	PF3D7_0924000.iso1.exon2.amp1_2373	-0.126120246	-0.020579156	0.10554109	0.308945339	0.514344504	FALSE
1279	PF3D7_0924200.iso1.exon1.amp1_2570	-0.106722336	0.018449588	0.125171924	0.30966517	0.514396408	FALSE
1280	PF3D7_0924600.iso1.exon1.amp1_2177	-0.238777281	0.083310861	0.322088143	0.074379867	0.445590672	FALSE
1281	PF3D7_0924600.iso1.exon2.amp2_seg1_2289	-0.05000055	0.032786754	0.082787304	0.331842479	0.529775829	FALSE
1282	PF3D7_0925300.1o1_6180	-0.087780216	0.006031531	0.093811747	0.358414466	0.545895797	FALSE
1283	PF3D7_0925800.e1s1_9121	-0.087472006	0.043117151	0.130589158	0.373766822	0.556520742	FALSE
1284	PF3D7_0925900.e2s1_8042	-0.1710597	-0.000556221	0.170503479	0.085082306	0.445590672	FALSE
1285	PF3D7_0926200.iso1.exon1.amp1_3505	-0.08523119	0.01048959	0.09572078	0.287995124	0.498999882	FALSE
1286	PF3D7_0926500.iso1.exon1.amp2_2495	-0.048698423	0.038181125	0.086879548	0.242954744	0.474735263	FALSE
1287	PF3D7_0927300.e1s1_7797	-0.068428208	0.062525179	0.130953387	0.225547333	0.463802224	FALSE
1288	PF3D7_0927700.1o1_7283	-0.125687728	0.013180896	0.138868624	0.220345215	0.462225243	FALSE
1289	PF3D7_0927800.2o2_4680	-0.077424693	0.008262023	0.085686715	0.319196099	0.52127307	FALSE
1290	PF3D7_0927900.1o1_4984	-0.096186472	0.047661456	0.143847928	0.098272965	0.445590672	FALSE
1291	PF3D7_0928600.1o1_6100	-0.111074905	-0.044541058	0.066533846	0.521167188	0.654727954	FALSE
1292	PF3D7_0928700.iso1.exon1.amp1_3151	0.039376573	0.044418595	0.005042022	0.967129344	0.978646944	FALSE
1293	PF3D7_0929000.2o2_8472	-0.096350258	-0.027738585	0.068611673	0.660912219	0.759562594	FALSE
1294	PF3D7_0929000.e2_5102	-0.155749477	-0.040486221	0.115263256	0.507878174	0.647313818	FALSE
1295	PF3D7_0929600.2o2_4963	-0.062487623	0.01111739	0.073605013	0.21623383	0.460244033	FALSE
1296	PF3D7_0929800.iso1.exon1.amp1_4123	-0.113843909	-0.030380494	0.083463415	0.552208161	0.67941715	FALSE
1297	PF3D7_0929900.iso1.exon1.amp1_1496	-0.050937032	-0.010873846	0.040063185	0.630101429	0.735188445	FALSE
1298	PF3D7_0930100.iso1.exon1.amp2_192	-0.057840365	-0.021387078	0.036453287	0.493779197	0.636061807	FALSE
1299	PF3D7_0930200.iso1.exon4.amp1_2997	-0.043749915	-0.010586428	0.033163487	0.608245289	0.72159857	FALSE
1300	PF3D7_0930300.s1_9167	-0.064781952	0.093121312	0.157903265	0.452249252	0.604569342	FALSE
1301	PF3D7_0930300.s2_8884	0.007480623	0.061202473	0.05372185	0.703747656	0.793391635	FALSE
1302	PF3D7_0930600.iso1.exon5.amp1_2100	-0.111696464	0.007704407	0.119400871	0.105667335	0.445590672	FALSE
1303	PF3D7_0930700.iso1.exon1.amp1_702	-0.091511758	-0.024967272	0.066544486	0.336970946	0.534124666	FALSE
1304	PF3D7_0930700.iso1.exon2.amp1_2944	-0.095610858	-0.002160718	0.09345014	0.299389654	0.50644154	FALSE
1305	PF3D7_0931300.1o1_6427	0.029479091	-0.078052837	-0.107531928	0.203006402	0.459216362	FALSE
1306	PF3D7_0931300_6263	-0.039057993	-0.019520611	0.019537382	0.844734508	0.891805558	FALSE
1307	PF3D7_0931400.3o4_4980	0.035717762	0.045868224	0.010150462	0.922692349	0.947703058	FALSE
1308	PF3D7_0931600.iso1.exon2.amp1_2996	0.028308972	0.084748478	0.056439506	0.718870387	0.804354575	FALSE
1309	PF3D7_0931700.2o3_7353	0.004165257	0.080328585	0.076163327	0.541070753	0.670417029	FALSE
1310	PF3D7_0931800.e1s1_7757	-0.127668552	0.017372501	0.145041053	0.031269005	0.445590672	FALSE
1311	PF3D7_0932100.2o5_9117	-0.234905013	0.063635475	0.298540489	0.013645642	0.445590672	FALSE
1312	PF3D7_0932300.e1s1_4887	-0.014138836	0.075455502	0.089594338	0.329796261	0.528141999	FALSE
1313	PF3D7_0932700.iso1.exon1.amp2_4526	-0.072791393	0.048889097	0.121680489	0.073541569	0.445590672	FALSE
1314	PF3D7_0933100.4o4_8227	-0.080369689	-0.080005044	0.000364645	0.995595676	0.996340989	FALSE
1315	PF3D7_0933500.s1_5707	-0.077270267	0.02881658	0.106086847	0.079860324	0.445590672	FALSE
1316	PF3D7_0933600.e1s1_8054	-0.056256145	0.073706658	0.129962803	0.084055556	0.445590672	FALSE
1317	PF3D7_0933900.4o4_5828	-0.141924429	0.04483242	0.186756849	0.250498918	0.478165841	FALSE
1318	PF3D7_0934300.1o1_7830	-0.133010962	0.049911756	0.182922718	0.043341491	0.445590672	FALSE
1319	PF3D7_0935600.1o2_7901	-0.14943478	0.061383438	0.210818218	0.278014812	0.493428522	FALSE
1320	PF3D7_0935800.e1_5085	-0.081139596	0.050536843	0.13167644	0.274263264	0.492339431	FALSE
1321	PF3D7_0935800.e2_5959	-0.098011548	0.065843014	0.163854563	0.153042391	0.446174939	FALSE
1322	PF3D7_0935800.e9_9148	0.041177424	0.217670583	0.176493159	0.399768106	0.571871068	FALSE
1323	PF3D7_0935900.e1s1_8599	-0.134493853	-0.047134844	0.087359009	0.454478038	0.606259	FALSE
1324	PF3D7_0935900.e2s1_9232	-0.092457484	0.02823843	0.120695915	0.529383527	0.661903531	FALSE
1325	PF3D7_0936200.2o2_4952	-0.014372753	0.023952685	0.038325438	0.821673903	0.876368818	FALSE
1326	PF3D7_0936300.2o2_8152	-0.172652825	0.072223475	0.2448763	0.007338983	0.445590672	FALSE
1327	PF3D7_0936400.2o2_8989	-0.019733029	0.08399286	0.103725889	0.384870385	0.562418989	FALSE
1328	PF3D7_0936500.iso1.exon1.amp1_973	-0.114339599	0.039365859	0.153705459	0.197054557	0.459216362	FALSE
1329	PF3D7_0936600.2o2_6426	-0.101737867	-0.013789031	0.087948836	0.186000457	0.451638999	FALSE
1330	PF3D7_0936700.1o1_7018	-0.175707329	0.021026363	0.196733691	0.073224726	0.445590672	FALSE
1331	PF3D7_0936800.e2s1_5455	-0.125460186	0.003384083	0.128844269	0.200848205	0.459216362	FALSE
1332	PF3D7_0937000.2o2_6410	0.076367488	0.039559029	-0.036808459	0.670436927	0.766057516	FALSE
1333	PF3D7_0937200.1o1_7291	-0.16078886	0.103490903	0.264279763	0.035196346	0.445590672	FALSE
1334	PF3D7_0937300.iso1.exon2.amp1_3309	-0.058976288	0.013402514	0.072378802	0.757369311	0.828261914	FALSE
1335	PF3D7_0937400.iso1.exon2.amp1_1296	-0.175558262	0.01519055	0.190748812	0.201927564	0.459216362	FALSE
1336	PF3D7_0937500.iso1.exon1.amp1_4176	-0.217080362	0.011549705	0.228630068	0.349566183	0.541614365	FALSE
1337	PF3D7_0937600.iso1.exon1.amp1_2479	-0.056444065	0.004100943	0.060545009	0.348320432	0.541293918	FALSE
1338	PF3D7_0937600.iso1.exon2.amp1_3322	0.015849362	0.080635985	0.064786624	0.675349542	0.769788665	FALSE
1339	PF3D7_0937700.iso1.exon2.amp1_713	-0.289064447	0.065388425	0.354452871	0.127576365	0.445590672	FALSE
1340	PF3D7_0937800.iso1.exon1.amp1_2169	-0.10099158	-0.030674066	0.070317514	0.442708396	0.598407245	FALSE
1341	PF3D7_0937800.iso1.exon2.amp1_1654	-0.165663594	0.055200811	0.220864405	0.044431804	0.445590672	FALSE
1342	PF3D7_1000100.iso1.exon2.amp1_3908	-0.189303027	0.090320124	0.279623151	0.021894086	0.445590672	FALSE
1343	PF3D7_1000200.iso1.exon1.amp1_1575	-0.037948725	0.127077198	0.165025923	0.481151599	0.626928012	FALSE
1344	PF3D7_1000300.iso1.exon1.amp1_3601	-0.104207028	0.033361594	0.137568622	0.125804605	0.445590672	FALSE
1345	PF3D7_1000400.iso1.exon1.amp1_1864	-0.294986609	0.053725498	0.348712106	0.112893372	0.445590672	FALSE
1346	PF3D7_1000500.iso1.exon3.amp1_4465	-0.23380657	0.047928391	0.281734961	0.018460611	0.445590672	FALSE
1347	PF3D7_1001300.2o2_6130	-0.069920342	-0.036887333	0.033033009	0.79537856	0.855810239	FALSE
1348	PF3D7_1001500.1o1_6967	-0.056348162	0.148003653	0.204351814	0.322105428	0.523578257	FALSE
1349	PF3D7_1001600.2o2_4757	0.072675196	0.016790734	-0.055884462	0.69638485	0.787056828	FALSE
1350	PF3D7_1001700.2o2_9009	0.016401423	0.090549242	0.074147819	0.664849157	0.762781111	FALSE
1351	PF3D7_1001900.2o2_7282	-0.097640149	0.073300867	0.170941016	0.117644185	0.445590672	FALSE
1352	PF3D7_1002100.2o2_7048	-0.065545313	0.078629332	0.144174645	0.12653407	0.445590672	FALSE
1353	PF3D7_1002500.1o3_8986	-0.202104619	0.093223941	0.29532856	0.070356472	0.445590672	FALSE
1354	PF3D7_1002800.e1s2_6354	-0.082930023	-0.004613869	0.078316155	0.398276258	0.570775623	FALSE
1355	PF3D7_1003100.iso1.exon3.amp1_38	-0.08272532	0.008876141	0.091601461	0.23851578	0.46999174	FALSE
1356	PF3D7_1003400.iso1.exon1.amp3_seg2_2299	-0.184310071	0.021617902	0.205927974	0.168779526	0.451638999	FALSE
1357	PF3D7_1003600.e1s1_8919	-0.136399213	0.080999027	0.21739824	0.012023561	0.445590672	FALSE
1358	PF3D7_1003800.e1s2_7780	0.000558025	0.092153544	0.091595519	0.482434914	0.628018613	FALSE
1359	PF3D7_1004200.e2s2_6055	0.000369846	0.07715252	0.076782673	0.422455104	0.588164902	FALSE
1360	PF3D7_1004300.iso1.exon1.amp2_2505	-0.038910896	-0.036649092	0.002261805	0.990003857	0.99212681	FALSE
1361	PF3D7_1004800.2o3_6717	-0.170681641	0.027510584	0.198192225	0.086097342	0.445590672	FALSE
1362	PF3D7_1005000.1o1_7075	-0.084382826	0.043821026	0.128203852	0.186428245	0.451638999	FALSE
1363	PF3D7_1005300.2o2_8452	-0.040538804	0.014084393	0.054623197	0.48614196	0.630792251	FALSE
1364	PF3D7_1005500.e2s1_9236	-0.027144748	0.067539307	0.094684055	0.228482023	0.46545958	FALSE
1365	PF3D7_1005700.iso1.exon2.amp1_3583	-0.05889488	-0.026975472	0.031919408	0.596278247	0.714514617	FALSE
1366	PF3D7_1006000.iso1.exon2.amp1_1866	-0.091953432	0.060509699	0.152463132	0.236649364	0.467636128	FALSE
1367	PF3D7_1006500.1o1_7278	-0.176760533	0.118727201	0.295487734	0.068765033	0.445590672	FALSE
1368	PF3D7_1007000.iso1.exon8.amp1_631	-0.268323503	0.012409093	0.280732596	0.035632823	0.445590672	FALSE
1369	PF3D7_1007300.iso1.exon1.amp1_3315	-0.09532389	0.012157629	0.107481519	0.397758862	0.570775623	FALSE
1370	PF3D7_1007700.e1s1_6640	-0.313578618	-0.045756048	0.26782257	0.250068373	0.478165841	FALSE
1371	PF3D7_1007700.e1s2_8091	-0.243051602	0.014239056	0.257290658	0.178015754	0.451638999	FALSE
1372	PF3D7_1007800.iso1.exon1.amp1_1414	-0.126749263	-0.101823482	0.024925781	0.896005536	0.930518342	FALSE
1373	PF3D7_1008000.s2_8597	-0.185732363	0.024751663	0.210484026	0.113211526	0.445590672	FALSE
1374	PF3D7_1008100.s1_7726	-0.182500086	-0.022833328	0.159666759	0.22578104	0.463802224	FALSE
1375	PF3D7_1008100.s3_5986	-0.15233624	0.080971912	0.233308153	0.137852214	0.446174939	FALSE
1376	PF3D7_1008200.iso1.exon1.amp1_2743	-0.095940349	0.114925238	0.210865586	0.026405097	0.445590672	FALSE
1377	PF3D7_1008400.e1s1_5157	0.055094511	0.123477875	0.068383364	0.570278147	0.693372444	FALSE
1378	PF3D7_1008600.1o1_6726	-0.129107173	-0.014615119	0.114492054	0.30422199	0.509580921	FALSE
1379	PF3D7_1008700.e3s1_6589	-0.044198674	-0.005793454	0.03840522	0.615316888	0.725600096	FALSE
1380	PF3D7_1008800.e1s1_8915	-0.146640412	-0.028812512	0.1178279	0.097554493	0.445590672	FALSE
1381	PF3D7_1009000.1o1_8727	-0.092040935	0.050213418	0.142254352	0.317893819	0.520982321	FALSE
1382	PF3D7_1009300.iso1.exon1.amp1_1604	-0.05440516	0.022155007	0.076560167	0.216669472	0.460244033	FALSE
1383	PF3D7_1009500.e3_5958	-0.109762566	0.146883319	0.256645885	0.038976827	0.445590672	FALSE
1384	PF3D7_1009600.iso1.exon3.amp1_2459	-0.097574452	0.062448089	0.160022541	0.324026732	0.525020711	FALSE
1385	PF3D7_1010200.iso1.exon1.amp2_1917	0.041113046	0.029754542	-0.011358504	0.84834438	0.894942679	FALSE
1386	PF3D7_1010900.iso1.exon2.amp1_108	-0.141578928	-0.003049552	0.138529375	0.159898146	0.446174939	FALSE
1387	PF3D7_1011300.1o1_5319	-0.079400937	0.058619575	0.138020512	0.157310785	0.446174939	FALSE
1388	PF3D7_1011400.1o1_6697	-0.050685241	0.059708124	0.110393365	0.248972977	0.477510416	FALSE
1389	PF3D7_1011500.1o1_7558	-0.077753404	0.053087109	0.130840513	0.094770943	0.445590672	FALSE
1390	PF3D7_1011700 (renamed)_6433	0.011503256	-0.001477004	-0.012980261	0.942489881	0.96204646	FALSE
1391	PF3D7_1011800.e1s2_7200	-0.013641324	0.043965881	0.057607204	0.483345415	0.628909765	FALSE
1392	PF3D7_1011900.iso1.exon4.amp1_2357	-0.184316587	0.030623982	0.21494057	0.075429335	0.445590672	FALSE
1393	PF3D7_1012000.iso1.exon1.amp1_2737	-0.104142834	0.046621701	0.150764535	0.03267175	0.445590672	FALSE
1394	PF3D7_1012000.iso1.exon9.amp1_3295	-0.060357446	0.021302053	0.081659499	0.084078998	0.445590672	FALSE
1395	PF3D7_1012100.iso1.exon1.amp1_2444	-0.00199371	0.034075725	0.036069435	0.534386305	0.666260205	FALSE
1396	PF3D7_1012200.1o2_8148	0.039878052	0.016740902	-0.023137149	0.930810708	0.953248074	FALSE
1397	PF3D7_1012400.e3s1_5724	-0.110554087	0.017057112	0.127611199	0.203195507	0.459216362	FALSE
1398	PF3D7_1012500.e1s1_9230	-0.118659536	0.092382647	0.211042182	0.083300886	0.445590672	FALSE
1399	PF3D7_1012600.e1s1_9222	-0.12581762	0.043963671	0.169781291	0.161806389	0.446174939	FALSE
1400	PF3D7_1012700.e1s1_7980	-0.132751829	-0.018882907	0.113868921	0.371429322	0.556516845	FALSE
1401	PF3D7_1012700.e1s2_6240	-0.18325405	0.021621124	0.204875175	0.186687163	0.451657294	FALSE
1402	PF3D7_1013100.1o2_5076	0.000902887	0.081252004	0.080349117	0.230800827	0.466049286	FALSE
1403	PF3D7_1013100.2o2_4787	-0.062472137	0.033479139	0.095951276	0.203471839	0.459216362	FALSE
1404	PF3D7_1013200.iso1.exon1.amp1_4310	-0.08154656	0.054251409	0.135797969	0.176532795	0.451638999	FALSE
1405	PF3D7_1013200.iso1.exon1.amp2_2506	-0.115019403	0.0373273	0.152346703	0.22391968	0.462690334	FALSE
1406	PF3D7_1013400.iso1.exon9.amp1_3307	-0.09326603	0.029406766	0.122672796	0.276303915	0.49298223	FALSE
1407	PF3D7_1013700.iso1.exon1.amp1_3828	-0.050396903	0.029652168	0.080049071	0.300732601	0.506503126	FALSE
1408	PF3D7_1013900.iso1.exon1.amp2_seg2_4622	-0.356622174	0.058573265	0.415195438	0.004807564	0.445590672	FALSE
1409	PF3D7_1014000.iso1.exon6.amp1_1249	-0.095941233	-0.07014895	0.025792283	0.69881248	0.789472278	FALSE
1410	PF3D7_1014000.iso1.exon7.amp1_955	-0.097000735	0.038354432	0.135355168	0.12922566	0.445590672	FALSE
1411	PF3D7_1014100.s1_5371	0.064423048	0.083769276	0.019346228	0.908897542	0.938537719	FALSE
1412	PF3D7_1014100.s2_5660	-0.200943527	0.046828765	0.247772293	0.074844058	0.445590672	FALSE
1413	PF3D7_1014300.e1s3_6628	-0.117580593	0.05513223	0.172712823	0.004353115	0.445590672	FALSE
1414	PF3D7_1014500.iso1.exon1.amp2_3369	-0.15804138	0.051547298	0.209588679	0.072204452	0.445590672	FALSE
1415	PF3D7_1014600 (renamed, has duplicates)_5653	-0.093309691	0.031688596	0.124998286	0.316248507	0.520982321	FALSE
1416	PF3D7_1014600.e1s2_7100	-0.203814596	0.051469038	0.255283634	0.079004902	0.445590672	FALSE
1417	PF3D7_1014600.e1s3_8257	-0.151184283	-0.002013903	0.14917038	0.319458011	0.521397126	FALSE
1418	PF3D7_1014800.6o11_8787	-0.176307663	0.029728844	0.206036507	0.083608931	0.445590672	FALSE
1419	PF3D7_1014800.7o11_8498	-0.045136662	0.012997672	0.058134334	0.202169639	0.459216362	FALSE
1420	PF3D7_1014900.iso1.exon1.amp1_3710	-0.030733415	0.043160147	0.073893562	0.425879093	0.590002459	FALSE
1421	PF3D7_1015100.1o1_9044	-0.205390215	0.092088192	0.297478407	0.182727064	0.451638999	FALSE
1422	PF3D7_1015200.iso1.exon3.amp1_1792	-0.094670723	0.005900008	0.100570731	0.212391787	0.459216362	FALSE
1423	PF3D7_1015500.1o1_8772	-0.124791725	0.100363314	0.225155039	0.325333882	0.525286433	FALSE
1424	PF3D7_1015900.e2s1_5752	-0.138664054	0.089415979	0.228080033	0.037960259	0.445590672	FALSE
1425	PF3D7_1016000.iso1.exon1.amp1_1018	-0.015740162	-0.005009183	0.010730979	0.819172459	0.874366035	FALSE
1426	PF3D7_1016200.1o1_8491	-0.114502283	0.047248837	0.161751119	0.357141249	0.54506478	FALSE
1427	PF3D7_1016300.e1s1_5130	0.059429901	0.037525655	-0.021904246	0.911668524	0.939909803	FALSE
1428	PF3D7_1016500.e1s1_7472	-0.122447557	0.041938815	0.164386372	0.119406126	0.445590672	FALSE
1429	PF3D7_1016500.e2s1_8376	-0.114791449	0.006723836	0.121515285	0.195360043	0.459216362	FALSE
1430	PF3D7_1016700.iso1.exon2.amp1_3820	-0.064131045	-0.03701158	0.027119465	0.734280656	0.815738098	FALSE
1431	PF3D7_1016900.e1s1_4855	-0.087776368	0.054146364	0.141922732	0.135816295	0.446174939	FALSE
1432	PF3D7_1017000.e1s1_7482	-0.106787869	0.013018621	0.11980649	0.345781438	0.539925238	FALSE
1433	PF3D7_1017000.e1s2_7193	-0.094846612	0.029166586	0.124013197	0.143918823	0.446174939	FALSE
1434	PF3D7_1017100.1o1_6988	-0.049193819	0.023329739	0.072523558	0.572739154	0.694920202	FALSE
1435	PF3D7_1017300.1.2o2_6764	-0.199273009	0.080414055	0.279687064	0.049213977	0.445590672	FALSE
1436	PF3D7_1017800.iso1.exon3.amp1_1681	-0.046843621	0.056035113	0.102878734	0.181960667	0.451638999	FALSE
1437	PF3D7_1017800.iso1.exon3.amp2_1970	-0.02667513	0.054488556	0.081163686	0.292995652	0.502777927	FALSE
1438	PF3D7_1017900.e2s1_5746	-0.166861778	0.01798607	0.184847849	0.016721436	0.445590672	FALSE
1439	PF3D7_1018000.1o1_8202	-0.128116097	0.004016334	0.132132431	0.110385071	0.445590672	FALSE
1440	PF3D7_1018100.1o1_6997	-0.092151852	0.052297595	0.144449447	0.03922993	0.445590672	FALSE
1441	PF3D7_1018300.e1s1_5945	-0.167608271	0.072594582	0.240202853	0.128800726	0.445590672	FALSE
1442	PF3D7_1018300.e2s2_5481	-0.135996796	-0.040276319	0.095720478	0.433572308	0.593386111	FALSE
1443	PF3D7_1019000.e1s1_6639	-0.152531601	0.041591247	0.194122848	0.042796973	0.445590672	FALSE
1444	PF3D7_1019000.e1s2_6350	-0.123105145	0.007314005	0.13041915	0.231547082	0.466049286	FALSE
1445	PF3D7_1019300.iso1.exon1.amp2_1043	-0.199505957	0.04779086	0.247296817	0.109951803	0.445590672	FALSE
1446	PF3D7_1019400.e2s1_9178	-0.101890275	0.029983581	0.131873856	0.149122792	0.446174939	FALSE
1447	PF3D7_1019500.1.6o25_6176	-0.030052738	0.068440211	0.098492949	0.39314501	0.566775635	FALSE
1448	PF3D7_1019500.1.9o25_6465	-0.050837048	-0.02741736	0.023419688	0.81079525	0.868233006	FALSE
1449	PF3D7_1020200.e2s1_4857	-0.108416386	0.077789064	0.18620545	0.028272198	0.445590672	FALSE
1450	PF3D7_1020200.e3s1_5754	-0.042988395	0.004180336	0.047168731	0.184106503	0.451638999	FALSE
1451	PF3D7_1020300.e1s1_7784	-0.095857901	0.077090558	0.172948459	0.059517306	0.445590672	FALSE
1452	PF3D7_1020500.1o1_4727	0.024180607	0.024277464	9.69E-05	0.998730867	0.998730867	FALSE
1453	PF3D7_1020700.e1s1_7201	-0.015774088	0.00306204	0.018836128	0.877599103	0.915471683	FALSE
1454	PF3D7_1020700.e1s2_8363	-0.167472398	0.046237542	0.213709941	0.066336289	0.445590672	FALSE
1455	PF3D7_1020800.11o11_6470	-0.13595067	-0.056258686	0.079691984	0.444161187	0.599339735	FALSE
1456	PF3D7_1021000.iso1.exon2.amp1_3284	-0.132922621	0.019390155	0.152312776	0.087525967	0.445590672	FALSE
1457	PF3D7_1021000.iso1.exon4.amp1_1510	-0.148585804	0.003949828	0.152535632	0.204916843	0.459216362	FALSE
1458	PF3D7_1021200.1o1_6485	-0.225905067	-0.101935819	0.123969248	0.396192565	0.569120878	FALSE
1459	PF3D7_1021500.iso1.exon1.amp1_154	-0.26971716	-0.027074065	0.242643095	0.198823392	0.459216362	FALSE
1460	PF3D7_1021600.e1s1_6028	0.014417595	0.040455052	0.026037457	0.740215446	0.818865122	FALSE
1461	PF3D7_1021700.e1s2_6931	-0.128398805	-0.02971561	0.098683195	0.475665552	0.625107218	FALSE
1462	PF3D7_1021700.e1s3_8087	-0.043032845	0.100715071	0.143747916	0.135513498	0.446174939	FALSE
1463	PF3D7_1021700.e2s2_7510	0.033429038	0.006245117	-0.027183921	0.710814286	0.797568331	FALSE
1464	PF3D7_1021700.e3s1_8324	-0.141381074	-0.001392804	0.13998827	0.270938082	0.492339431	FALSE
1465	PF3D7_1021800.iso1.exon2.amp1_3703	-0.190458754	0.129665533	0.320124288	0.001855849	0.445590672	FALSE
1466	PF3D7_1021900.e1s2_5472	0.003140378	-0.045006347	-0.048146724	0.747303211	0.823396628	FALSE
1467	PF3D7_1021900.e1s3_6056	-0.051681092	0.200745381	0.252426473	0.129584755	0.445590672	FALSE
1468	PF3D7_1022000.e2_4806	-0.171732365	0.025806729	0.197539094	0.283310705	0.495475768	FALSE
1469	PF3D7_1022200.e2s1_5154	-0.092196223	0.024714446	0.116910669	0.087351585	0.445590672	FALSE
1470	PF3D7_1022300.2o6_4974	-0.221825077	-0.01272991	0.209095167	0.151951072	0.446174939	FALSE
1471	PF3D7_1022700.1o1_7854	-0.105482947	0.138248441	0.243731388	0.02346384	0.445590672	FALSE
1472	PF3D7_1023100.e1s3_6525	-0.06714593	-0.034437277	0.032708652	0.816141735	0.872459559	FALSE
1473	PF3D7_1023100.e1s4_6236	-0.113068527	0.083963532	0.197032058	0.039861938	0.445590672	FALSE
1474	PF3D7_1023100.e1s6_5941	-0.113066753	0.087421424	0.200488177	0.337200943	0.534139544	FALSE
1475	PF3D7_1023200.1o1_6706	-0.00095733	0.067201506	0.068158835	0.475026515	0.625107218	FALSE
1476	PF3D7_1023900.s3_8307	-0.051171338	0.005224503	0.05639584	0.62857434	0.734496757	FALSE
1477	PF3D7_1024000.iso1.exon1.amp1_1314	-0.122120006	0.054534217	0.176654223	0.072904642	0.445590672	FALSE
1478	PF3D7_1024300.1o1_7540	-0.076385981	0.033509637	0.109895619	0.200159114	0.459216362	FALSE
1479	PF3D7_1024400.1o2_7617	-0.072626282	0.051330707	0.123956988	0.177102399	0.451638999	FALSE
1480	PF3D7_1024800.e2s2_5767	-0.06672247	0.039442904	0.106165374	0.36548819	0.552468402	FALSE
1481	PF3D7_1026500.iso1.exon1.amp1_1214	-0.047492098	-0.067517521	-0.020025423	0.790130288	0.851143037	FALSE
1482	PF3D7_1026900.1o1_7582	-0.107754932	0.050694267	0.158449199	0.095837885	0.445590672	FALSE
1483	PF3D7_1027000.iso1.exon1.amp2_seg1_3452	-0.134796402	0.050546146	0.185342547	0.223822353	0.462690334	FALSE
1484	PF3D7_1027400.iso1.exon1.amp1_87	-0.103388151	-0.065442327	0.037945824	0.604881761	0.720513364	FALSE
1485	PF3D7_1028000.iso1.exon2.amp1_1224	-0.056340338	-0.014364706	0.041975632	0.410554899	0.578747121	FALSE
1486	PF3D7_1028300.e1s1_5740	-0.145105622	0.038452095	0.183557717	0.035425026	0.445590672	FALSE
1487	PF3D7_1028700.1o1_8478	-0.090384004	0.042479093	0.132863097	0.353607296	0.543891859	FALSE
1488	PF3D7_1028900.2o2_7542	-0.078453637	0.01279148	0.091245116	0.073403346	0.445590672	FALSE
1489	PF3D7_1029400.1o1_7611	-0.105660813	0.079568978	0.185229791	0.085963719	0.445590672	FALSE
1490	PF3D7_1029500.1o1_4650	-0.123851622	0.140432413	0.264284035	0.023847882	0.445590672	FALSE
1491	PF3D7_1030200.1o1_4717	0.159400583	0.790168437	0.630767854	0.020412884	0.445590672	FALSE
1492	PF3D7_1030400.2o2_6704	-0.020631924	-0.012772902	0.007859022	0.960509197	0.974272022	FALSE
1493	PF3D7_1030500.1o1_4988	-0.189076831	0.019951459	0.20902829	0.058229444	0.445590672	FALSE
1494	PF3D7_1030700.iso1.exon1.amp1_391	-0.245333645	-0.003591138	0.241742507	0.076372823	0.445590672	FALSE
1495	PF3D7_1030800.1o1_5237	-0.21900607	-0.010278331	0.208727738	0.126918358	0.445590672	FALSE
1496	PF3D7_1031500.iso1.exon1.amp1_1891	-0.065902977	0.079170703	0.145073679	0.157536962	0.446174939	FALSE
1497	PF3D7_1031500.iso1.exon4.amp1_656	-0.08974755	0.007142738	0.096890288	0.322288185	0.523578257	FALSE
1498	PF3D7_1031800.iso1.exon1.amp1_698	-0.169512812	0.039117274	0.208630085	0.01823421	0.445590672	FALSE
1499	PF3D7_1032100.iso1.exon1.amp1_3724	-0.112829125	0.008845631	0.121674756	0.327242857	0.52674453	FALSE
1500	PF3D7_1032100.iso1.exon1.amp2_4232	-0.13583252	0.053411812	0.189244332	0.132074702	0.446174939	FALSE
1501	PF3D7_1032400.3o7_4720	-0.109752272	0.010432076	0.120184348	0.329308691	0.527948296	FALSE
1502	PF3D7_1032900.e1s1_8259	-0.22235246	-0.01428459	0.20806787	0.221890563	0.462351789	FALSE
1503	PF3D7_1033700.e3s1_8911	-0.129588479	-0.020096878	0.1094916	0.163577498	0.446178312	FALSE
1504	PF3D7_1033800.8o8_9037	-0.165556373	-0.022009494	0.143546878	0.306218924	0.511703137	FALSE
1505	PF3D7_1034100.iso1.exon2.amp1_2074	-0.152164414	0.000907372	0.153071786	0.181741941	0.451638999	FALSE
1506	PF3D7_1034500.iso1.exon2.amp2_seg1_573	-0.10096491	0.003772531	0.104737441	0.349339047	0.541614365	FALSE
1507	PF3D7_1034700.1o1_4662	-0.093230834	-0.009667854	0.08356298	0.246397433	0.475696555	FALSE
1508	PF3D7_1034900.e1s1_8260	-0.161036577	0.066685288	0.227721865	0.067366478	0.445590672	FALSE
1509	PF3D7_1035000.1o1_8245	-0.046271576	-0.028516488	0.017755088	0.843342176	0.891204129	FALSE
1510	PF3D7_1035100.1o1_8208	-0.208203723	-0.01073418	0.197469544	0.249649611	0.478154036	FALSE
1511	PF3D7_1035200.1o1_4741	-0.089543149	0.008063326	0.097606475	0.351925427	0.543338268	FALSE
1512	PF3D7_1035300.iso1.exon1.amp1_2847	-0.103132028	0.144691799	0.247823827	0.004832101	0.445590672	FALSE
1513	PF3D7_1035300.iso1.exon1.amp2_3364	-0.07266026	0.06122014	0.1338804	0.011971528	0.445590672	FALSE
1514	PF3D7_1035600.1o1_6162	-0.093474276	0.061446734	0.15492101	0.164105484	0.447183458	FALSE
1515	PF3D7_1035700.e1s1_8948	-0.065322341	-0.004478944	0.060843397	0.545655334	0.674610916	FALSE
1516	PF3D7_1035800.1o1_5041	-0.199986247	0.098782363	0.29876861	0.041878047	0.445590672	FALSE
1517	PF3D7_1035900.1o1_5890	0.191996633	0.238019742	0.04602311	0.830600339	0.88454362	FALSE
1518	PF3D7_1036000.1o1_5293	-0.06875434	0.073761424	0.142515764	0.428944577	0.591327726	FALSE
1519	PF3D7_1036300.1o1_6786	-0.047648231	0.05610456	0.103752791	0.448225204	0.602215367	FALSE
1520	PF3D7_1036400.1o2_6117	0.099715821	0.036159206	-0.063556615	0.700736253	0.791008234	FALSE
1521	PF3D7_1036400.e2s2_6540	0.094295855	0.007913741	-0.086382114	0.632230471	0.735714369	FALSE
1522	PF3D7_1036500.1o1_6762	-0.252967136	0.096683534	0.34965067	0.049629925	0.445590672	FALSE
1523	PF3D7_1036600.iso1.exon3.amp1_3273	-0.218605967	0.073665687	0.292271654	0.030886174	0.445590672	FALSE
1524	PF3D7_1036600.iso2.exon3.amp1_3851	-0.202452625	0.021228466	0.22368109	0.139228722	0.446174939	FALSE
1525	PF3D7_1036900.e1s2_5948	-0.224899509	0.099133931	0.324033439	0.005954349	0.445590672	FALSE
1526	PF3D7_1036900.e2s1_6576	-0.113522265	0.020646263	0.134168529	0.132264724	0.446174939	FALSE
1527	PF3D7_1037000.iso1.exon3.amp1_4275	-0.067448252	-0.005151631	0.062296621	0.716288797	0.802106145	FALSE
1528	PF3D7_1037000.iso1.exon3.amp2_4564	-0.036391492	0.046952698	0.08334419	0.612369185	0.723361408	FALSE
1529	PF3D7_1037100.1o1_9098	-0.06690726	0.131079376	0.197986636	0.053884503	0.445590672	FALSE
1530	PF3D7_1037200.10o12_7895	-0.135444841	0.040296725	0.175741565	0.036313166	0.445590672	FALSE
1531	PF3D7_1037600.e2s1_7184	-0.117225486	0.018059529	0.135285016	0.328857915	0.527765992	FALSE
1532	PF3D7_1037600.e3s1_6616	-0.13459424	0.029255308	0.163849548	0.17660043	0.451638999	FALSE
1533	PF3D7_1038400.e1s1_8544	-0.142725837	-0.046429521	0.096296316	0.317438167	0.520982321	FALSE
1534	PF3D7_1038400.e3s1_7460	-0.119322061	0.028867274	0.148189335	0.328464793	0.527765992	FALSE
1535	PF3D7_1038400.e7s1_7389	-0.109543608	-0.00344819	0.106095417	0.347560102	0.541057444	FALSE
1536	PF3D7_1038500.2o2_4992	0.05184299	0.027940079	-0.023902911	0.852167253	0.897287637	FALSE
1537	PF3D7_1038600.2o2_8191	-0.128141403	0.011436662	0.139578065	0.177025046	0.451638999	FALSE
1538	PF3D7_1038900.e1s1_9213	-0.100385251	0.017743571	0.118128822	0.389670106	0.562923739	FALSE
1539	PF3D7_1039700.iso1.exon1.amp1_1851	-0.24421266	0.077917418	0.322130078	0.136578323	0.446174939	FALSE
1540	PF3D7_1039900.iso1.exon2.amp1_3588	-0.069488179	-0.01519482	0.05429336	0.657714534	0.75769579	FALSE
1541	PF3D7_1040000.iso1.exon2.amp1_1585	-0.270620791	0.006412911	0.277033702	0.279423398	0.494323791	FALSE
1542	PF3D7_1040100.iso1.exon2.amp1_3299	-0.052371412	0.068794504	0.121165916	0.324395684	0.525020711	FALSE
1543	PF3D7_1040200.iso1.exon2.amp1_408	-0.33450798	0.0145956	0.34910358	0.142682133	0.446174939	FALSE
1544	PF3D7_1040300.iso1.exon2.amp1_997	-0.380390983	0.054944099	0.435335083	0.056524633	0.445590672	FALSE
1545	PF3D7_1040400.iso1.exon2.amp1_2156	-0.244087364	-0.006282307	0.237805057	0.175457346	0.451638999	FALSE
1546	PF3D7_1040500.iso1.exon2.amp1_2735	-0.273400286	0.130669929	0.404070215	0.018719605	0.445590672	FALSE
1547	PF3D7_1040600.iso1.exon2.amp1_2150	-0.151942217	-0.089062383	0.062879834	0.671137361	0.766080918	FALSE
1548	PF3D7_1040700.iso1.exon2.amp1_419	-0.240284056	-0.01730911	0.222974946	0.201439747	0.459216362	FALSE
1549	PF3D7_1040900.iso1.exon2.amp1_2143	-0.108764188	0.066324084	0.175088272	0.272947133	0.492339431	FALSE
1550	PF3D7_1041000.iso1.exon2.amp1_1280	-0.154739989	0.033988054	0.188728042	0.262549526	0.486254208	FALSE
1551	PF3D7_1041100.iso1.exon2.amp1_3013	-0.168119643	-0.016197281	0.151922362	0.306800232	0.512369178	FALSE
1552	PF3D7_1041200.iso1.exon2.amp1_2153	-0.290804298	0.041971	0.332775297	0.082696019	0.445590672	FALSE
1553	PF3D7_1041300.iso1.exon1.amp1_1293	-0.288427319	0.003804477	0.292231796	0.039587666	0.445590672	FALSE
1554	PF3D7_1041300.iso1.exon2.amp1_498	-0.104147354	-0.058019767	0.046127587	0.597501799	0.715369361	FALSE
1555	PF3D7_1041300.iso1.exon2.amp2_787	-0.159916249	-0.03780586	0.122110389	0.425345608	0.590002459	FALSE
1556	PF3D7_1100100.iso1.exon1.amp1_4545	-0.117231318	0.073451684	0.190683002	0.03361749	0.445590672	FALSE
1557	PF3D7_1100100.iso1.exon2.amp1_1582	-0.261345868	-0.03494926	0.226396608	0.127974396	0.445590672	FALSE
1558	PF3D7_1100200.e1s1_7391	-0.047697256	0.110849065	0.158546322	0.043927777	0.445590672	FALSE
1559	PF3D7_1100200.e1s2_8548	-0.05593884	-0.015055512	0.040883328	0.50196903	0.642182675	FALSE
1560	PF3D7_1100200.e1s3_7392	-0.037485882	0.040261083	0.077746964	0.299999785	0.50644154	FALSE
1561	PF3D7_1100300.iso1.exon2.amp1_4474	-0.225675788	0.080380726	0.306056514	0.037878637	0.445590672	FALSE
1562	PF3D7_1100400.iso1.exon2.amp1_3590	-0.35620926	0.001126054	0.357335314	0.205117338	0.459216362	FALSE
1563	PF3D7_1100500.iso1.exon1.amp1_699	0.040792099	-0.024728199	-0.065520299	0.766370255	0.834525124	FALSE
1564	PF3D7_1100800.2o2_4959	-0.068504688	0.007194289	0.075698977	0.371107569	0.556516845	FALSE
1565	PF3D7_1101100.iso1.exon1.amp1_3897	-0.269059941	0.000790575	0.269850516	0.052798901	0.445590672	FALSE
1566	PF3D7_1101200.iso1.exon1.amp1_3319	-0.197387862	0.082433022	0.279820883	0.208882964	0.459216362	FALSE
1567	PF3D7_1101300.iso1.exon1.amp1_2434	-0.173657824	0.043653607	0.217311431	0.089652805	0.445590672	FALSE
1568	PF3D7_1101500.iso1.exon1.amp1_3877	-0.057752009	-0.008543637	0.049208372	0.600109471	0.716655433	FALSE
1569	PF3D7_1101700.iso1.exon2.amp1_2140	-0.30785507	0.152429131	0.460284201	0.034707577	0.445590672	FALSE
1570	PF3D7_1102200.iso1.exon1.amp1_2170	-0.245380728	0.195916928	0.441297657	0.04132044	0.445590672	FALSE
1571	PF3D7_1102400.1o1_6766	-0.088640565	0.076511814	0.165152379	0.039141644	0.445590672	FALSE
1572	PF3D7_1102500.e2s1_5459	0.045617388	0.125567391	0.079950003	0.720024483	0.805324551	FALSE
1573	PF3D7_1102700.iso1.exon1.amp1_375	-0.125448365	-0.035454515	0.08999385	0.374464354	0.556951425	FALSE
1574	PF3D7_1102800.iso1.exon1.amp1_671	-0.091846748	0.064292041	0.15613879	0.333766541	0.531726473	FALSE
1575	PF3D7_1103000.iso1.exon1.amp1_1212	-0.095516025	-0.012620179	0.082895846	0.222255773	0.462351789	FALSE
1576	PF3D7_1103100.e2s1_8572	-0.229566331	-0.063519745	0.166046585	0.162183086	0.446174939	FALSE
1577	PF3D7_1103500.13o13_6965	-0.094937403	0.051755954	0.146693357	0.103451199	0.445590672	FALSE
1578	PF3D7_1103500.1o13_8994	-0.107037391	0.097623543	0.204660934	0.184459017	0.451638999	FALSE
1579	PF3D7_1103500.1o2_7831	-0.149870861	0.066628294	0.216499155	0.125507145	0.445590672	FALSE
1580	PF3D7_1103800.e1s1_7393	-0.426955791	0.093667441	0.520623232	0.038747743	0.445590672	FALSE
1581	PF3D7_1104000.1o3_6466	-0.103727257	-0.037391208	0.066336049	0.396427564	0.569166866	FALSE
1582	PF3D7_1104100.4o4_7289	-0.207173251	-0.074521991	0.13265126	0.299488964	0.50644154	FALSE
1583	PF3D7_1104200.e1s2_5379	-0.102866629	0.016731314	0.119597943	0.21664498	0.460244033	FALSE
1584	PF3D7_1104800.2o9_8185	-0.10699559	0.0008253	0.10782089	0.197126626	0.459216362	FALSE
1585	PF3D7_1105200.iso1.exon3.amp1_951	-0.105460037	-0.007333469	0.098126568	0.266614467	0.48957889	FALSE
1586	PF3D7_1105600.e1s1_6922	-0.100021317	0.059906543	0.15992786	0.239355157	0.470983761	FALSE
1587	PF3D7_1105900.iso1.exon1.amp1_1541	-0.090214155	-0.033855407	0.056358748	0.431527766	0.592558205	FALSE
1588	PF3D7_1106100.iso1.exon4.amp1_381	-0.026574735	-0.014696945	0.011877791	0.735022799	0.81623918	FALSE
1589	PF3D7_1106300.2o6_8231	-0.180090398	0.020820502	0.2009109	0.247687935	0.475696555	FALSE
1590	PF3D7_1106700.iso1.exon1.amp2_772	-0.00606911	0.023464364	0.029533473	0.586744725	0.705805324	FALSE
1591	PF3D7_1107400.iso1.exon1.amp1_3598	-0.145583265	0.055765543	0.201348807	0.157565803	0.446174939	FALSE
1592	PF3D7_1107500.iso1.exon5.amp1_2058	-0.089274969	0.009038022	0.09831299	0.219401024	0.461613264	FALSE
1593	PF3D7_1107600.iso1.exon1.amp1_seg2_2908	-0.180292781	0.003535316	0.183828097	0.169018924	0.451638999	FALSE
1594	PF3D7_1107600.iso1.exon1.amp2_3661	-0.038252233	-0.019161761	0.019090472	0.858553283	0.900966843	FALSE
1595	PF3D7_1107800.e2s1_7678	-0.205388642	-0.103358669	0.102029972	0.517195209	0.652174773	FALSE
1596	PF3D7_1107900.iso1.exon1.amp1_542	-0.081762831	-0.097109407	-0.015346575	0.905609401	0.936794598	FALSE
1597	PF3D7_1108100.iso1.exon1.amp1_2831	-0.15229808	0.09846155	0.250759629	0.107335702	0.445590672	FALSE
1598	PF3D7_1108600.e1s1_6906	-0.093801738	0.031159404	0.124961141	0.251020014	0.478165841	FALSE
1599	PF3D7_1109200.3o4_6218	-0.013025626	0.03176105	0.044786676	0.818890679	0.874366035	FALSE
1600	PF3D7_1110200.e1s1_4895	0.05569988	0.064398275	0.008698394	0.972104549	0.9812438	FALSE
1601	PF3D7_1110200.e1s2_6629	-0.133687527	0.097656456	0.231343982	0.046347031	0.445590672	FALSE
1602	PF3D7_1110200.e2s1_6580	-0.043775759	0.00709956	0.050875319	0.149352454	0.446174939	FALSE
1603	PF3D7_1110400.e3s2_7791	-0.082713105	0.014347327	0.097060432	0.283794165	0.495491182	FALSE
1604	PF3D7_1110700.e2s1_5162	-0.028943981	-0.024680407	0.004263575	0.97314107	0.9812438	FALSE
1605	PF3D7_1111000.1o1_6758	-0.130939111	0.048210102	0.179149214	0.089415944	0.445590672	FALSE
1606	PF3D7_1111300.1o1_8154	-0.238405516	-0.019071471	0.219334045	0.041272264	0.445590672	FALSE
1607	PF3D7_1111400.iso1.exon1.amp1_2422	-0.012644224	-0.038759762	-0.026115538	0.749569916	0.824556314	FALSE
1608	PF3D7_1111600.iso1.exon1.amp1_437	-0.132930628	0.064353758	0.197284385	0.047411632	0.445590672	FALSE
1609	PF3D7_1111800.iso1.exon1.amp1_2132	-0.078005018	-0.031125019	0.04688	0.618511447	0.72747739	FALSE
1610	PF3D7_1111800.iso1.exon2.amp1_2710	-0.067561118	0.095346785	0.162907904	0.096047247	0.445590672	FALSE
1611	PF3D7_1111900.iso1.exon1.amp1_693	-0.098355595	0.013733839	0.112089434	0.269089947	0.491280943	FALSE
1612	PF3D7_1112100.iso1.exon1.amp1_1397	0.032108704	-0.058522606	-0.09063131	0.380922011	0.561379967	FALSE
1613	PF3D7_1112100.iso1.exon1.amp2_1686	-0.049505672	-0.013299982	0.03620569	0.598340135	0.716067323	FALSE
1614	PF3D7_1112100.iso1.exon1.amp3_2210	0.011138554	0.031404484	0.02026593	0.686435674	0.778137472	FALSE
1615	PF3D7_1112400.1o1_4663	-0.111984292	0.081871358	0.193855651	0.080194385	0.445590672	FALSE
1616	PF3D7_1113000.iso1.exon2.amp1_1889	-0.115789735	0.041380541	0.157170276	0.080488295	0.445590672	FALSE
1617	PF3D7_1113000.iso1.exon3.amp1_1542	-0.115867016	-0.054971844	0.060895172	0.680555081	0.774462843	FALSE
1618	PF3D7_1113000.iso1.exon5.amp1_118	-0.068749957	-0.02378097	0.044968986	0.578196747	0.698242014	FALSE
1619	PF3D7_1113000.iso1.exon7.amp3_1351	-0.055448047	-0.029376434	0.026071613	0.843794651	0.891204129	FALSE
1620	PF3D7_1113700.e1s1_8346	-0.203092835	-0.061531461	0.141561374	0.388718973	0.562418989	FALSE
1621	PF3D7_1114500.iso1.exon1.amp1_3323	0.009928733	0.066161612	0.056232878	0.487057843	0.631193212	FALSE
1622	PF3D7_1114700.e1_8271	-0.199459875	-0.02828804	0.171171835	0.167178881	0.451638999	FALSE
1623	PF3D7_1114900.e1s1_7681	-0.119329204	0.015573578	0.134902782	0.071402939	0.445590672	FALSE
1624	PF3D7_1114900.e1s2_9122	-0.134812319	0.051306971	0.186119291	0.158267078	0.446174939	FALSE
1625	PF3D7_1115200.2o7_7060	-0.062295467	0.048233028	0.110528495	0.235492007	0.467595484	FALSE
1626	PF3D7_1115300.e1s1_7187	-0.157322044	0.159691959	0.317014003	0.044792063	0.445590672	FALSE
1627	PF3D7_1115400.e1s1_6025	-0.070384385	0.218613681	0.288998066	0.109783272	0.445590672	FALSE
1628	PF3D7_1115600.e3s1_6879	-0.094892592	0.040010674	0.134903266	0.405697693	0.576279803	FALSE
1629	PF3D7_1115700.e1s1_7476	-0.12406138	0.059187923	0.183249302	0.090101693	0.445590672	FALSE
1630	PF3D7_1116000.iso1.exon2.amp1_3093	-0.140832754	0.056261175	0.19709393	0.456653205	0.607715039	FALSE
1631	PF3D7_1116000.iso1.exon2.amp2_3382	-0.18328024	0.089856361	0.273136602	0.295625351	0.504831599	FALSE
1632	PF3D7_1116800.e4s1_7224	-0.189323206	0.005728316	0.195051522	0.170693922	0.451638999	FALSE
1633	PF3D7_1117000.iso1.exon6.amp1_3500	0.025066792	-0.021731785	-0.046798577	0.654717043	0.755173422	FALSE
1634	PF3D7_1117200.iso1.exon2.amp1_1104	-0.058223813	0.06656587	0.124789683	0.080503869	0.445590672	FALSE
1635	PF3D7_1117800.iso1.exon1.amp1_264	-0.005679138	-0.011959444	-0.006280306	0.927495989	0.950895339	FALSE
1636	PF3D7_1117900.iso1.exon1.amp1_2246	-0.047194248	0.117774709	0.164968957	0.26762546	0.490471758	FALSE
1637	PF3D7_1118100.iso1.exon1.amp1_3510	-0.088578537	-0.034900514	0.053678023	0.498578608	0.639238417	FALSE
1638	PF3D7_1118100.iso1.exon2.amp1_2116	-0.108294403	-0.020503539	0.087790864	0.305918569	0.511506063	FALSE
1639	PF3D7_1118200.e1s1_7968	-0.266947818	0.109692287	0.376640104	0.015991973	0.445590672	FALSE
1640	PF3D7_1118300.e1s1_7205	-0.125534736	0.123147568	0.248682303	0.116687389	0.445590672	FALSE
1641	PF3D7_1118800.2o7_5861	-0.111490032	0.020561319	0.132051351	0.174625625	0.451638999	FALSE
1642	PF3D7_1119400.iso1.exon1.amp3_2783	-0.120681616	0.049889607	0.170571223	0.229818018	0.466049286	FALSE
1643	PF3D7_1119500.iso1.exon1.amp1_3300	-0.038889668	0.024804151	0.063693818	0.207915542	0.459216362	FALSE
1644	PF3D7_1119500.iso1.exon3.amp1_3827	-0.183126749	-0.031956433	0.151170316	0.205193525	0.459216362	FALSE
1645	PF3D7_1119700.iso1.exon1.amp1_1569	-0.242722208	-0.005595572	0.237126636	0.117823429	0.445590672	FALSE
1646	PF3D7_1119900.iso1.exon1.amp1_3728	-0.151795823	-0.029618129	0.122177693	0.345084225	0.539663227	FALSE
1647	PF3D7_1120300.2o2_8189	-0.147487422	0.034920746	0.182408168	0.099770018	0.445590672	FALSE
1648	PF3D7_1120400.iso1.exon2.amp1_1793	-0.186700264	0.005108262	0.191808525	0.091322786	0.445590672	FALSE
1649	PF3D7_1120700.iso1.exon1.amp2_3653	-0.142069616	-0.009045429	0.133024187	0.252156958	0.479029885	FALSE
1650	PF3D7_1120800.iso1.exon1.amp1_4126	-0.11558968	0.007877317	0.123466997	0.086543042	0.445590672	FALSE
1651	PF3D7_1121200.iso1.exon1.amp1_653	-0.16602882	0.001557367	0.167586187	0.093915362	0.445590672	FALSE
1652	PF3D7_1121600.iso1.exon2.amp1_2679	-0.09348675	0.118844621	0.21233137	0.226589246	0.464090844	FALSE
1653	PF3D7_1121700.e1s1_5657	-0.057887601	0.081139368	0.139026969	0.082688258	0.445590672	FALSE
1654	PF3D7_1121800.s1_7974	-0.130481852	0.171758039	0.302239891	0.015511347	0.445590672	FALSE
1655	PF3D7_1122000.iso1.exon1.amp1_4471	-0.182941658	0.040152241	0.223093898	0.024540999	0.445590672	FALSE
1656	PF3D7_1122500.iso1.exon1.amp1_3721	-0.094087453	0.037713701	0.131801153	0.175411809	0.451638999	FALSE
1657	PF3D7_1122500.iso1.exon1.amp2_4229	-0.146555806	0.020388941	0.166944747	0.09565883	0.445590672	FALSE
1658	PF3D7_1122600.2o2_5848	-0.205240643	-0.003672983	0.20156766	0.169418462	0.451638999	FALSE
1659	PF3D7_1122800.e1s1_6545	-0.102287331	0.073921707	0.176209038	0.046957079	0.445590672	FALSE
1660	PF3D7_1122900.e1s1_9126	-0.148821032	0.037334757	0.186155789	0.415017196	0.582301301	FALSE
1661	PF3D7_1122900.e2s2_7971	-0.259789645	0.094252315	0.35404196	0.035216362	0.445590672	FALSE
1662	PF3D7_1122900.e2s3_6815	-0.194028635	0.071769036	0.265797671	0.061554219	0.445590672	FALSE
1663	PF3D7_1122900.e2s5_7132	-0.068245056	0.070021928	0.138266984	0.201588719	0.459216362	FALSE
1664	PF3D7_1123000.iso1.exon1.amp3_1921	-0.038262884	0.036672531	0.074935415	0.312311961	0.517872702	FALSE
1665	PF3D7_1123200.iso1.exon1.amp1_3335	0.034062607	0.076463277	0.04240067	0.6513126	0.752794943	FALSE
1666	PF3D7_1123400.e1_5091	-0.211150533	-0.010535849	0.200614684	0.225450025	0.463802224	FALSE
1667	PF3D7_1123500.iso1.exon1.amp1_4580	-0.243880027	-0.077776864	0.166103163	0.461959537	0.613252368	FALSE
1668	PF3D7_1124000.1o5_7896	-0.122002941	0.012924759	0.1349277	0.32900676	0.527765992	FALSE
1669	PF3D7_1124000.2o5_7607	-0.101714114	0.01377737	0.115491484	0.28343193	0.495475768	FALSE
1670	PF3D7_1124100.iso1.exon1.amp1_1988	-0.104107642	0.125722981	0.229830623	0.147497208	0.446174939	FALSE
1671	PF3D7_1124300.1o3_7324	-0.248051046	0.052432827	0.300483873	0.133137311	0.446174939	FALSE
1672	PF3D7_1124400.iso1.exon1.amp1_1806	-0.076490562	-0.01104943	0.065441132	0.410587538	0.578747121	FALSE
1673	PF3D7_1124500.1o1_7615	-0.010909313	0.016841575	0.027750888	0.772740059	0.839830669	FALSE
1674	PF3D7_1124600.e1s1_5168	-0.251695381	0.021835563	0.273530944	0.139029507	0.446174939	FALSE
1675	PF3D7_1124700.e1s1_6312	-0.047825573	0.010411948	0.058237521	0.416165863	0.582881658	FALSE
1676	PF3D7_1125300.iso1.exon1.amp1_2856	-0.048329602	0.089567883	0.137897485	0.387031849	0.562418989	FALSE
1677	PF3D7_1125300.iso1.exon1.amp2_3352	-0.030346	0.086614355	0.116960356	0.550571436	0.67859442	FALSE
1678	PF3D7_1125400.2o2_5277	-0.048350915	0.006737595	0.05508851	0.486847506	0.631193212	FALSE
1679	PF3D7_1125700.6o6_7634	-0.077430937	0.014464495	0.091895432	0.539287568	0.670235953	FALSE
1680	PF3D7_1125800.1o4_6747	-0.27367685	0.088904894	0.362581745	0.005988086	0.445590672	FALSE
1681	PF3D7_1125800.3o4_6458	-0.043211952	0.002598898	0.04581085	0.648231301	0.74985172	FALSE
1682	PF3D7_1126000.e1s2_8344	-0.122271886	-0.015958613	0.106313272	0.25859436	0.48276183	FALSE
1683	PF3D7_1126100.iso1.exon2.amp2_220	-0.163253099	0.039243309	0.202496408	0.210051307	0.459216362	FALSE
1684	PF3D7_1126300.e2_7985	-0.057202521	0.103172849	0.160375369	0.053399403	0.445590672	FALSE
1685	PF3D7_1126400.2o3_5535	-0.12850273	-0.004262086	0.124240645	0.298498143	0.50644154	FALSE
1686	PF3D7_1126500.iso1.exon1.amp1_2267	-0.161726667	0.058900882	0.220627549	0.052346465	0.445590672	FALSE
1687	PF3D7_1127000.e6s1_6000	-0.051005652	0.104693459	0.155699111	0.169346985	0.451638999	FALSE
1688	PF3D7_1127300.1o1_7293	-0.04707905	0.002876401	0.049955451	0.655524969	0.755794413	FALSE
1689	PF3D7_1127400.iso1.exon1.amp1_2346	-0.049015523	0.050910251	0.099925774	0.033285267	0.445590672	FALSE
1690	PF3D7_1127400.iso1.exon2.amp1_2078	-0.03393744	0.002875756	0.036813196	0.480909888	0.626928012	FALSE
1691	PF3D7_1127600.iso1.exon2.amp1_349	-0.081837839	0.020069066	0.101906905	0.118249925	0.445590672	FALSE
1692	PF3D7_1127700.1o3_4715	-0.108377485	0.144290752	0.252668237	0.013352384	0.445590672	FALSE
1693	PF3D7_1127900.3o3_6444	-0.108813406	-0.041257038	0.067556368	0.735770791	0.816746357	FALSE
1694	PF3D7_1128100.2o3_7845	-0.107301112	0.121327778	0.22862889	0.270391523	0.492323266	FALSE
1695	PF3D7_1128300.e1s1_8069	-0.032602963	0.008390705	0.040993668	0.587388135	0.7062763	FALSE
1696	PF3D7_1128300.e3s1_8903	-0.116513447	-0.028455928	0.08805752	0.231073336	0.466049286	FALSE
1697	PF3D7_1128500.1o1_8799	-0.250061753	0.013179732	0.263241485	0.163098899	0.446174939	FALSE
1698	PF3D7_1129000.e1s1_6583	-0.124827462	-0.009610159	0.115217302	0.153739466	0.446174939	FALSE
1699	PF3D7_1129100.e1s1_6319	-0.188410061	-0.063212169	0.125197892	0.508415932	0.64741066	FALSE
1700	PF3D7_1129200.2o4_7594	-0.16483897	0.036612369	0.201451339	0.11346848	0.445590672	FALSE
1701	PF3D7_1129500.iso1.exon1.amp1_4492	-0.244588623	0.015029573	0.259618196	0.16616728	0.451415536	FALSE
1702	PF3D7_1129600.e1s1_8953	-0.142199048	0.08156545	0.223764499	0.040343253	0.445590672	FALSE
1703	PF3D7_1129700.iso1.exon1.amp1_1271	-0.046019255	-0.040930454	0.0050888	0.926885077	0.95061659	FALSE
1704	PF3D7_1129800.1o1_9026	-0.095575872	0.24872608	0.344301951	0.061591591	0.445590672	FALSE
1705	PF3D7_1130200_5980	-0.035362301	0.147736085	0.183098386	0.34750423	0.541057444	FALSE
1706	PF3D7_1130400_8004	-0.088566702	0.019606007	0.108172709	0.379261444	0.560392687	FALSE
1707	PF3D7_1131200.iso1.exon1.amp1_62	-0.054241271	-0.001299053	0.052942219	0.473687322	0.62445663	FALSE
1708	PF3D7_1131200.iso1.exon6.amp1_345	-0.055658109	-0.051701478	0.003956631	0.934722005	0.956205948	FALSE
1709	PF3D7_1131600.s2_8288	-0.07792988	0.028999816	0.106929696	0.281832575	0.495475768	FALSE
1710	PF3D7_1131800.iso1.exon1.amp1_838	-0.075659309	-0.024517409	0.0511419	0.430526316	0.592212074	FALSE
1711	PF3D7_1132300.1o1_5547	-0.063047544	-0.060235289	0.002812255	0.988243567	0.990716826	FALSE
1712	PF3D7_1132900.1o1_6392	-0.071560973	0.07146983	0.143030802	0.202789794	0.459216362	FALSE
1713	PF3D7_1133200.e1s2_5075	-0.210806691	0.041708264	0.252514954	0.102457988	0.445590672	FALSE
1714	PF3D7_1133400_6235	0.286014511	0.638938372	0.352923861	0.079759137	0.445590672	FALSE
1715	PF3D7_1133500.iso1.exon1.amp1_1264	-0.044242624	0.011458506	0.05570113	0.535165333	0.666638646	FALSE
1716	PF3D7_1133500.iso1.exon2.amp1_4149	-0.048104073	0.031944355	0.080048428	0.58086463	0.700535236	FALSE
1717	PF3D7_1133700.iso1.exon1.amp1_970	-0.205011414	-0.044209098	0.160802316	0.174460136	0.451638999	FALSE
1718	PF3D7_1133800.iso1.exon1.amp1_1320	0.024085593	-0.018476113	-0.042561706	0.787174642	0.849470612	FALSE
1719	PF3D7_1133900.iso1.exon2.amp2_3355	-0.117429829	0.054050862	0.171480691	0.205893307	0.459216362	FALSE
1720	PF3D7_1134000.e1s1_6336	-0.134185674	-0.032128109	0.102057565	0.431497495	0.592558205	FALSE
1721	PF3D7_1134200.s1_7422	-0.095900391	0.013053666	0.108954057	0.471497712	0.622741208	FALSE
1722	PF3D7_1134300.iso1.exon1.amp1_4294	-0.097288073	0.035713376	0.133001449	0.090741228	0.445590672	FALSE
1723	PF3D7_1134300.iso1.exon1.amp2_4583	-0.135092044	0.008908537	0.144000582	0.141932853	0.446174939	FALSE
1724	PF3D7_1134300.iso1.exon1.amp3_4228	-0.074003832	0.035580609	0.10958444	0.231474232	0.466049286	FALSE
1725	PF3D7_1134500.s1_5988	-0.063953752	0.078482003	0.142435755	0.088623366	0.445590672	FALSE
1726	PF3D7_1134500.s2_6572	-0.095244891	-0.013739739	0.081505152	0.438371707	0.59695306	FALSE
1727	PF3D7_1134700.e1_5101	-0.100459045	0.067315495	0.16777454	0.159915601	0.446174939	FALSE
1728	PF3D7_1134700.e2s1_6257	-0.153650117	0.094135884	0.247786001	0.031141248	0.445590672	FALSE
1729	PF3D7_1134700.e2s2_6835	-0.102162421	0.069921052	0.172083473	0.287703547	0.498899658	FALSE
1730	PF3D7_1135100.1o1_6774	-0.116404522	0.055249419	0.171653941	0.10290011	0.445590672	FALSE
1731	PF3D7_1135400.e1s1_5738	-0.20737843	0.00731042	0.214688851	0.111599366	0.445590672	FALSE
1732	PF3D7_1136100.1o1_5019	-0.139480691	0.154635734	0.294116424	0.01725685	0.445590672	FALSE
1733	PF3D7_1136200.1o5_8797	-0.246591189	-0.051986293	0.194604896	0.216974637	0.460244033	FALSE
1734	PF3D7_1136200.5o5_9080	-0.229566727	0.028228676	0.257795403	0.04195783	0.445590672	FALSE
1735	PF3D7_1136300.e2s1_5389	0.041349454	0.002453375	-0.03889608	0.683813399	0.776280474	FALSE
1736	PF3D7_1136500.1.e4s1_8282	-0.120948029	0.009339706	0.130287735	0.211696045	0.459216362	FALSE
1737	PF3D7_1136600.iso1.exon1.amp1_4586	-0.072989416	-0.007252891	0.065736525	0.516314472	0.652137738	FALSE
1738	PF3D7_1136700.iso1.exon7.amp1_117	-0.009695924	-0.06388944	-0.054193516	0.317099961	0.520982321	FALSE
1739	PF3D7_1136900.e1s1_7134	-0.285041797	0.02112734	0.306169137	0.115018052	0.445590672	FALSE
1740	PF3D7_1136900.e2s1_4885	0.070163867	0.04877596	-0.021387907	0.781662175	0.845268315	FALSE
1741	PF3D7_1137100_7714	-0.111500849	0.046057458	0.157558307	0.272129322	0.492339431	FALSE
1742	PF3D7_1137300.1o1_6196	-0.129254093	0.004935134	0.134189227	0.280254772	0.494857923	FALSE
1743	PF3D7_1137600 (renamed)_7629	-0.214880576	0.010337579	0.225218154	0.263179477	0.486974378	FALSE
1744	PF3D7_1137600.1o2_7251	-0.05021592	-0.024589374	0.025626545	0.573776518	0.695428773	FALSE
1745	PF3D7_1137900.1o2_5315	-0.025814636	0.01109276	0.036907396	0.660960317	0.759562594	FALSE
1746	PF3D7_1137900.2o2_4737	-0.094780839	0.038151254	0.132932093	0.180506305	0.451638999	FALSE
1747	PF3D7_1138000.iso1.exon1.amp3_4227	-0.112238415	0.057654422	0.169892838	0.290403923	0.500179729	FALSE
1748	PF3D7_1138100.1o1_8413	-0.113725805	-0.055616321	0.058109484	0.580643115	0.700535236	FALSE
1749	PF3D7_1138400.e1s2_7418	-0.11219528	0.009639732	0.121835012	0.364094505	0.550955744	FALSE
1750	PF3D7_1138400.e1s3_5106	-0.041868122	0.072037753	0.113905876	0.477293173	0.625518203	FALSE
1751	PF3D7_1138400.e1s4_8575	-0.014937927	0.161407475	0.176345402	0.273185504	0.492339431	FALSE
1752	PF3D7_1138400.e1s5_8576	-0.185279959	-0.02430127	0.160978689	0.326766651	0.526367296	FALSE
1753	PF3D7_1138800.3o7_5545	-0.117651399	-0.000775701	0.116875698	0.330989292	0.529020137	FALSE
1754	PF3D7_1139100.iso1.exon1.amp2_3640	-0.1621041	0.001689448	0.163793548	0.185014597	0.451638999	FALSE
1755	PF3D7_1139200.iso1.exon2.amp1_3587	-0.091103844	0.014610231	0.105714075	0.210790985	0.459216362	FALSE
1756	PF3D7_1139300.e2s1_8655	-0.220012367	0.089126571	0.309138938	0.05208855	0.445590672	FALSE
1757	PF3D7_1139300.e2s3_8649	-0.316812467	0.062053381	0.378865848	0.076416255	0.445590672	FALSE
1758	PF3D7_1139500.1.e1s1_5751	-0.079986572	0.066997697	0.146984269	0.14299402	0.446174939	FALSE
1759	PF3D7_1140000.2o2_8125	-0.278647337	-0.027082503	0.251564833	0.16932848	0.451638999	FALSE
1760	PF3D7_1140100 (renamed)_5564	-0.300718849	0.050477893	0.351196743	0.201574249	0.459216362	FALSE
1761	PF3D7_1140500.e1s1_7204	0.053453641	-0.012520883	-0.065974524	0.463165675	0.614340848	FALSE
1762	PF3D7_1140900.3o6_8819	-0.178191971	0.045605197	0.223797169	0.042908146	0.445590672	FALSE
1763	PF3D7_1140900.5o6_9108	-0.125300786	0.046038168	0.171338954	0.078918614	0.445590672	FALSE
1764	PF3D7_1141200.iso1.exon1.amp1_2920	-0.06475502	-0.001107254	0.063647766	0.282620743	0.495475768	FALSE
1765	PF3D7_1141400.5o5_5552	-0.060845088	0.014477861	0.075322948	0.370137904	0.555973899	FALSE
1766	PF3D7_1141900.1o1_6461	-0.027624511	-0.078747316	-0.051122805	0.250901183	0.478165841	FALSE
1767	PF3D7_1142800_7136	-0.073642058	-0.041080592	0.032561465	0.786173217	0.848837005	FALSE
1768	PF3D7_1142900.e2_6836	-0.044367197	0.04727551	0.091642707	0.341041202	0.536613947	FALSE
1769	PF3D7_1143000.iso1.exon1.amp1_3893	-0.02993783	0.046507182	0.076445012	0.299732624	0.50644154	FALSE
1770	PF3D7_1143100.iso1.exon1.amp2_1039	-0.012442355	0.008734787	0.021177143	0.810949445	0.868233006	FALSE
1771	PF3D7_1143300.1o1_4684	-0.093323035	-0.000981051	0.092341984	0.337551809	0.534139544	FALSE
1772	PF3D7_1143900.iso1.exon2.amp1_1547	-0.19825085	0.002678525	0.200929375	0.068854106	0.445590672	FALSE
1773	PF3D7_1144200.iso1.exon2.amp1_2141	-0.086727732	0.083155461	0.169883194	0.034447207	0.445590672	FALSE
1774	PF3D7_1144500.1o1_6422	-0.114289986	0.015784549	0.130074536	0.048576729	0.445590672	FALSE
1775	PF3D7_1144600.iso1.exon1.amp1_3019	-0.062306882	0.010260124	0.072567006	0.215152409	0.460173422	FALSE
1776	PF3D7_1145200.iso1.exon1.amp1_1399	-0.076688792	0.053884674	0.130573465	0.178318655	0.451638999	FALSE
1777	PF3D7_1145200.iso1.exon1.amp3_2211	-0.009476029	0.027376389	0.036852418	0.485442535	0.630535709	FALSE
1778	PF3D7_1145400.e1s1_8368	-0.099317826	0.034596837	0.133914663	0.214812141	0.459923447	FALSE
1779	PF3D7_1145500.2o2_8228	-0.036773402	-0.069270949	-0.032497547	0.418819319	0.584845304	FALSE
1780	PF3D7_1145900.iso1.exon2.amp1_376	-0.073529829	-0.08386886	-0.01033903	0.905724022	0.936794598	FALSE
1781	PF3D7_1146000.1o1_8205	-0.198434933	0.017132505	0.215567438	0.18318389	0.451638999	FALSE
1782	PF3D7_1146500.1o1_8151	-0.212430331	-0.016647337	0.195782994	0.119903943	0.445590672	FALSE
1783	PF3D7_1146700.iso1.exon1.amp1_3331	-0.057094421	0.082457853	0.139552274	0.126005502	0.445590672	FALSE
1784	PF3D7_1146800.e3s1_4831	-0.242004314	0.082660387	0.324664702	0.094300421	0.445590672	FALSE
1785	PF3D7_1147200.iso1.exon1.amp3_4233	-0.062139207	0.005052268	0.067191476	0.494125347	0.636146682	FALSE
1786	PF3D7_1147800.1.e2s1_5119	-0.090040389	0.009666142	0.099706531	0.202848546	0.459216362	FALSE
1787	PF3D7_1147800.iso2.exon1.amp1_325	-0.163148516	0.016872903	0.180021419	0.11403503	0.445590672	FALSE
1788	PF3D7_1148900.iso1.exon1.amp1_1825	-0.062624329	-0.063075247	-0.000450918	0.997675797	0.998031728	FALSE
1789	PF3D7_1149000.e1s1_5748	-0.234086072	0.040407652	0.274493724	0.013517736	0.445590672	FALSE
1790	PF3D7_1149000.s4 (renamed)_8579	0.034540684	-0.096279716	-0.1308204	0.551633237	0.679007725	FALSE
1791	PF3D7_1149000.s6 (renamed)_7423	0.042631347	0.017058088	-0.025573259	0.908078672	0.938537632	FALSE
1792	PF3D7_1149100.iso2.exon1.amp1_4097	-0.055570459	0.002072011	0.05764247	0.465087057	0.616306289	FALSE
1793	PF3D7_1149100.iso2.exon2.amp1_3610	-0.025744884	-0.029855166	-0.004110283	0.947800731	0.965709756	FALSE
1794	PF3D7_1149200.e2s1_6829	-0.00972692	-0.001479909	0.00824701	0.949637647	0.966780561	FALSE
1795	PF3D7_1149200.e2s2_6546	-0.064283503	-0.049652926	0.014630577	0.933402971	0.955553827	FALSE
1796	PF3D7_1149500.3o4_7655	-0.160273932	-0.006797457	0.153476475	0.169044292	0.451638999	FALSE
1797	PF3D7_1149500.e2_6825	-0.087189178	0.043610222	0.130799401	0.081128552	0.445590672	FALSE
1798	PF3D7_1149900.iso1.exon2.amp1_4166	-0.293558021	0.00771193	0.301269951	0.221869215	0.462351789	FALSE
1799	PF3D7_1150000.iso1.exon2.amp1_3314	-0.20478142	-0.014822358	0.189959061	0.235852678	0.467595484	FALSE
1800	PF3D7_1150200.iso1.exon1.amp1_412	-0.226110442	0.030974523	0.257084965	0.009364627	0.445590672	FALSE
1801	PF3D7_1150300.iso1.exon1.amp1_2740	-0.219119767	0.046319423	0.26543919	0.044060537	0.445590672	FALSE
1802	PF3D7_1150400.iso1.exon2.amp1_714	-0.07853471	0.032089986	0.110624696	0.362714016	0.549459805	FALSE
1803	PF3D7_1200100.iso1.exon1.amp2_794	-0.237299268	0.05866935	0.295968618	0.021326836	0.445590672	FALSE
1804	PF3D7_1200200.iso1.exon1.amp1_2148	-0.193625924	0.022696008	0.216321933	0.202296663	0.459216362	FALSE
1805	PF3D7_1200300.e2s1_7189	-0.147484462	-0.025656673	0.12182779	0.323291313	0.524903787	FALSE
1806	PF3D7_1200400.iso1.exon1.amp2_776	-0.058279487	0.047103519	0.105383007	0.415336163	0.582301301	FALSE
1807	PF3D7_1200400.iso1.exon2.amp1_720	-0.28485871	-0.036339523	0.248519187	0.104359481	0.445590672	FALSE
1808	PF3D7_1200500.iso1.exon1.amp1_2436	-0.141752399	0.012180589	0.153932987	0.132037592	0.446174939	FALSE
1809	PF3D7_1200600.iso1.exon2.amp3_2805	-0.275082427	0.04734701	0.322429438	0.098625726	0.445590672	FALSE
1810	PF3D7_1200800.iso1.exon2.amp1_4209	-0.042438091	-0.023070712	0.019367379	0.858882658	0.900975298	FALSE
1811	PF3D7_1201200.2o2_4660	-0.060841079	0.060084521	0.1209256	0.635815822	0.738230876	FALSE
1812	PF3D7_1201300.1o1_7539	-0.067890047	0.026677132	0.094567179	0.40061698	0.571871068	FALSE
1813	PF3D7_1201300_8869	-0.075333871	0.080051672	0.155385543	0.081203261	0.445590672	FALSE
1814	PF3D7_1201400.iso1.exon1.amp1_218	-0.156108247	0.050391966	0.206500213	0.101613645	0.445590672	FALSE
1815	PF3D7_1201400.iso1.exon1.amp2_2193	-0.185566522	0.03533556	0.220902083	0.12166025	0.445590672	FALSE
1816	PF3D7_1202200_6847	-0.080235413	0.043599209	0.123834622	0.418735359	0.584845304	FALSE
1817	PF3D7_1202300.e14s1_9188	-0.108489801	0.047167873	0.155657674	0.148947049	0.446174939	FALSE
1818	PF3D7_1202300.e31s1_7502	-0.213504645	0.02787611	0.241380755	0.189627972	0.455627108	FALSE
1819	PF3D7_1202300.e33s1_5173	-0.03261215	0.059168004	0.091780154	0.286322557	0.497119783	FALSE
1820	PF3D7_1202300.e34s1_6594	-0.071666504	0.018341987	0.090008491	0.083261895	0.445590672	FALSE
1821	PF3D7_1202600.e1_8857	-0.041250681	0.09227981	0.133530491	0.07349707	0.445590672	FALSE
1822	PF3D7_1203700.e3_8270	-0.084483476	0.046371304	0.130854781	0.430555893	0.592212074	FALSE
1823	PF3D7_1203900 (renamed)_7587	-0.147111482	0.020334164	0.167445646	0.150628044	0.446174939	FALSE
1824	PF3D7_1204300_6840	-0.078820439	0.022342278	0.101162716	0.339054187	0.535509936	FALSE
1825	PF3D7_1205100.iso1.exon1.amp1_152	-0.086978006	-0.062261995	0.024716011	0.710279535	0.797287357	FALSE
1826	PF3D7_1205400.iso1.exon1.amp2_488	-0.145750146	-0.009097742	0.136652404	0.158405952	0.446174939	FALSE
1827	PF3D7_1205500.e1s1_6267	-0.164248572	-0.02796447	0.136284102	0.212907325	0.459216362	FALSE
1828	PF3D7_1205500.e1s2_5111	-0.277227893	-0.138511339	0.138716554	0.506850267	0.646591514	FALSE
1829	PF3D7_1205800.3o4_5646	-0.00052114	-0.011992037	-0.011470898	0.91739075	0.943640375	FALSE
1830	PF3D7_1206000.1o1_7583	-0.135382697	0.026035564	0.161418261	0.143438513	0.446174939	FALSE
1831	PF3D7_1206100.e2s1_6587	-0.039322873	0.043985983	0.083308856	0.640045258	0.742219563	FALSE
1832	PF3D7_1206600.iso1.exon1.amp1_261	-0.00812443	0.01054313	0.018667561	0.823719712	0.877882962	FALSE
1833	PF3D7_1206900 (renamed, has duplicates)_7621	-0.070361307	-0.013525137	0.05683617	0.479365202	0.626581664	FALSE
1834	PF3D7_1206900.4o4_7049	0.001758772	0.207170146	0.205411374	0.226587345	0.464090844	FALSE
1835	PF3D7_1207000.e3s1_7223	-0.008506516	0.008893971	0.017400487	0.908919831	0.938537719	FALSE
1836	PF3D7_1207200.iso1.exon1.amp3_2782	0.016116659	0.038801682	0.022685023	0.748911495	0.82415535	FALSE
1837	PF3D7_1207400.2o2_8755	-0.086539381	0.034991344	0.121530724	0.538147766	0.669164672	FALSE
1838	PF3D7_1207500.e3s1_6870	-0.125820898	0.014576525	0.140397423	0.087912317	0.445590672	FALSE
1839	PF3D7_1207600.1o1_4730	0.034454908	0.032809852	-0.001645057	0.98688022	0.990313337	FALSE
1840	PF3D7_1208000.iso1.exon1.amp1_342	-0.11595282	-0.047016	0.068936819	0.671509089	0.766080918	FALSE
1841	PF3D7_1208100 (renamed, has duplicates)_7883	-0.035729301	0.023445605	0.059174905	0.392527527	0.566176535	FALSE
1842	PF3D7_1208100.e2s1_5771	-0.054181369	0.050482277	0.104663646	0.183190347	0.451638999	FALSE
1843	PF3D7_1208100.e2s2_5482	0.110248718	-0.014895091	-0.12514381	0.439062578	0.59695306	FALSE
1844	PF3D7_1208500.iso1.exon1.amp2_seg1_1423	-0.038640021	0.023267542	0.061907563	0.441274498	0.597852192	FALSE
1845	PF3D7_1208800.e1s1_6623	-0.265089372	-0.016312025	0.248777346	0.219740189	0.461676697	FALSE
1846	PF3D7_1208900.s1_5377	-0.089011013	0.025198233	0.114209246	0.530459639	0.662838158	FALSE
1847	PF3D7_1209400.e1s1_8090	-0.126203063	0.066020884	0.192223947	0.309996169	0.514641361	FALSE
1848	PF3D7_1209500.1.3o3_5905	-0.081768982	0.027272357	0.109041339	0.200525494	0.459216362	FALSE
1849	PF3D7_1209500.iso2.exon2.amp1_3320	-0.02495331	0.078032181	0.10298549	0.373001925	0.556516845	FALSE
1850	PF3D7_1209900.1o1_8507	-0.106611487	-0.002993552	0.103617935	0.410260047	0.578747121	FALSE
1851	PF3D7_1210100.1o1_7277	-0.15731998	0.082352405	0.239672385	0.128672604	0.445590672	FALSE
1852	PF3D7_1210600.iso1.exon1.amp1_4021	-0.321540609	0.033041701	0.35458231	0.104887187	0.445590672	FALSE
1853	PF3D7_1210600.iso1.exon1.amp2_4535	-0.252435563	0.046341661	0.298777224	0.107037945	0.445590672	FALSE
1854	PF3D7_1211000.e3s1_5406	-0.181236931	0.00084446	0.182081391	0.191934782	0.458029898	FALSE
1855	PF3D7_1211000.e3s2_8300	0.075495825	-0.074745781	-0.150241605	0.368032365	0.554763881	FALSE
1856	PF3D7_1211300.e2s1_4865	-0.011371125	0.041769363	0.053140488	0.161559922	0.446174939	FALSE
1857	PF3D7_1211600.iso1.exon1.amp2_2832	-0.161121157	0.083189619	0.244310776	0.021492675	0.445590672	FALSE
1858	PF3D7_1211900.e1s1_5489	-0.122849244	-0.010770551	0.112078693	0.358862435	0.546121679	FALSE
1859	PF3D7_1211900.e2s1_8064	-0.157148503	0.047697428	0.204845932	0.05205944	0.445590672	FALSE
1860	PF3D7_1212000 (renamed)_7876	-0.150970872	0.030569018	0.18153989	0.049772487	0.445590672	FALSE
1861	PF3D7_1212000.e2s1_5966	-0.065535241	0.017669638	0.083204879	0.253428091	0.479108298	FALSE
1862	PF3D7_1212400.1o1_5266	-0.015423963	-0.040745878	-0.025321915	0.776279826	0.842282335	FALSE
1863	PF3D7_1212500.1o1_4735	-0.13030596	0.054946208	0.185252167	0.058400728	0.445590672	FALSE
1864	PF3D7_1212700.s1_9130	-0.187326973	-0.000509591	0.186817382	0.141914808	0.446174939	FALSE
1865	PF3D7_1212800_6558	-0.094920918	0.015900559	0.110821477	0.141472122	0.446174939	FALSE
1866	PF3D7_1212900.e1s1_8355	-0.115837748	0.084433947	0.200271695	0.344870043	0.539629242	FALSE
1867	PF3D7_1213400.e1s1_8061	-0.082640359	0.001915418	0.084555778	0.113792927	0.445590672	FALSE
1868	PF3D7_1213500.1o2_5618	-0.166146002	0.069904403	0.236050405	0.091455142	0.445590672	FALSE
1869	PF3D7_1214000.iso1.exon2.amp1_2096	-0.053880858	0.049511377	0.103392235	0.087264571	0.445590672	FALSE
1870	PF3D7_1215100.e1s1_8868	-0.167943103	0.079792152	0.247735256	0.224337861	0.46321308	FALSE
1871	PF3D7_1215200.iso1.exon1.amp1_1558	-0.112429573	0.017328329	0.129757902	0.27365021	0.492339431	FALSE
1872	PF3D7_1215400.1o1_8489	-0.170827866	0.055163604	0.225991469	0.136189404	0.446174939	FALSE
1873	PF3D7_1215900.1o1_5893	-0.0963293	0.043434532	0.139763832	0.402653666	0.57316437	FALSE
1874	PF3D7_1216300.iso1.exon1.amp1_2121	-0.059119641	0.062256522	0.121376163	0.321019657	0.522917273	FALSE
1875	PF3D7_1216500.e1s1_7177	-0.028069182	0.061460944	0.089530125	0.235241887	0.467595484	FALSE
1876	PF3D7_1216600_6846	-0.1226608	0.028431471	0.151092271	0.283705972	0.495491182	FALSE
1877	PF3D7_1216900.e1s1_6556	0.004191272	0.007873872	0.0036826	0.97797832	0.985004026	FALSE
1878	PF3D7_1217900.3o3_5875	-0.054122157	0.023430848	0.077553006	0.576713078	0.69732793	FALSE
1879	PF3D7_1218200.e1s2_6823	-0.088841545	0.055435204	0.144276749	0.04055431	0.445590672	FALSE
1880	PF3D7_1218500.e3s1_4808	-0.065077782	0.016860934	0.081938717	0.355526081	0.54506478	FALSE
1881	PF3D7_1218600.e2s1_6329	-0.178708499	-0.031173848	0.147534652	0.151389516	0.446174939	FALSE
1882	PF3D7_1219000.iso1.exon1.amp1_seg1_4603	-0.089461366	0.052010639	0.141472006	0.183288708	0.451638999	FALSE
1883	PF3D7_1219100.e1s1_9152	-0.222765379	0.051571289	0.274336668	0.1083163	0.445590672	FALSE
1884	PF3D7_1219100.e1s2_9153	-0.157080817	0.070837018	0.227917835	0.050255543	0.445590672	FALSE
1885	PF3D7_1219300.iso1.exon1.amp1_4486	-0.160731549	0.037518712	0.198250262	0.022299583	0.445590672	FALSE
1886	PF3D7_1219600.iso1.exon3.amp1_2541	-0.088898154	-0.007083255	0.081814899	0.526223517	0.658425141	FALSE
1887	PF3D7_1219600.iso1.exon3.amp2_2830	-0.070568949	0.125083621	0.19565257	0.074438205	0.445590672	FALSE
1888	PF3D7_1219700.e1s1_6308	-0.171234699	0.013194263	0.184428961	0.055527653	0.445590672	FALSE
1889	PF3D7_1219800.iso1.exon1.amp1_616	-0.228076104	-0.012698806	0.215377298	0.112776702	0.445590672	FALSE
1890	PF3D7_1219900.1o1_5820	-0.109802715	0.030481006	0.140283721	0.282746089	0.495475768	FALSE
1891	PF3D7_1220100.1o1_7044	-0.004492233	0.016892178	0.02138441	0.820459459	0.875406516	FALSE
1892	PF3D7_1220300.iso1.exon1.amp1_2695	-0.073093238	0.031575877	0.104669114	0.170541885	0.451638999	FALSE
1893	PF3D7_1220600.2o4_7295	0.059911667	0.019366515	-0.040545152	0.746355031	0.823280687	FALSE
1894	PF3D7_1221000.e1s1_8662	-0.096889057	-0.027706172	0.069182885	0.425582285	0.590002459	FALSE
1895	PF3D7_1221000.e1s3_4910	-0.390051528	0.160911287	0.550962815	0.042642225	0.445590672	FALSE
1896	PF3D7_1221300.iso1.exon6.amp1_1262	0.063156114	0.029102919	-0.034053195	0.843846991	0.891204129	FALSE
1897	PF3D7_1221400.e1s1_6610	-0.024464563	-0.015116326	0.009348237	0.869445746	0.909334529	FALSE
1898	PF3D7_1221500.1o1_6483	-0.131936845	-0.018888275	0.11304857	0.383464393	0.561932526	FALSE
1899	PF3D7_1221600.1o1_4708	-0.21323643	-0.064691902	0.148544528	0.349212378	0.541614365	FALSE
1900	PF3D7_1221900.1o1_9091	-0.133786884	0.035653265	0.169440149	0.147044201	0.446174939	FALSE
1901	PF3D7_1222300.e1s1_9154	0.113177973	-0.036228761	-0.149406734	0.278389416	0.493428522	FALSE
1902	PF3D7_1222600 (renamed, has duplicates)_6843	-0.274312865	0.039988828	0.314301693	0.075869475	0.445590672	FALSE
1903	PF3D7_1222600.e1s1_5687	-0.118396178	0.035424247	0.153820425	0.147856081	0.446174939	FALSE
1904	PF3D7_1222700.1o1_8121	0.119804733	-0.017038559	-0.136843292	0.506741607	0.646591514	FALSE
1905	PF3D7_1223100.e3s1_6322	-0.095249269	-0.024482619	0.070766651	0.360592516	0.548022448	FALSE
1906	PF3D7_1223600.1o2_8535	-0.130172821	-0.003412273	0.126760548	0.402659916	0.57316437	FALSE
1907	PF3D7_1223600.e1_5670	-0.1290133	-0.010743153	0.118270147	0.355263258	0.54506478	FALSE
1908	PF3D7_1223600.e2s1_8263	-0.122213264	0.080695105	0.202908369	0.18481886	0.451638999	FALSE
1909	PF3D7_1223700.1o2_5258	-0.157214582	-0.012499898	0.144714684	0.302253005	0.50809493	FALSE
1910	PF3D7_1223800.iso1.exon1.amp1_short_2872	-0.152380391	0.035563857	0.187944248	0.178713431	0.451638999	FALSE
1911	PF3D7_1223900.iso1.exon1.amp1_106	-0.02597995	0.002588467	0.028568417	0.702067988	0.792192611	FALSE
1912	PF3D7_1224200.1o5_7077	-0.060272501	0.043580134	0.103852634	0.209404387	0.459216362	FALSE
1913	PF3D7_1224500.2o2_4969	-0.223281017	0.082960597	0.306241614	0.113196419	0.445590672	FALSE
1914	PF3D7_1225600.e2s1_7774	-0.047084686	-0.003508345	0.043576341	0.420857247	0.58688687	FALSE
1915	PF3D7_1226000.e1_5411	-0.028597161	-0.017313352	0.011283809	0.8928663	0.92828962	FALSE
1916	PF3D7_1226100.1o1_4971	-0.140623831	0.09594024	0.236564071	0.027645875	0.445590672	FALSE
1917	PF3D7_1226300.e1s1_6601	-0.074511376	0.001055156	0.075566531	0.269468648	0.491280943	FALSE
1918	PF3D7_1226400.iso1.exon3.amp1_1587	-0.159906723	-0.061141532	0.098765191	0.387857561	0.562418989	FALSE
1919	PF3D7_1226800.2o5_6721	-0.161356669	0.000818142	0.162174811	0.080929806	0.445590672	FALSE
1920	PF3D7_1227100.e1s1_4898	-0.232780825	0.03745835	0.270239175	0.209757188	0.459216362	FALSE
1921	PF3D7_1227200.iso1.exon1.amp2_815	-0.149724513	0.141941993	0.291666506	0.010654368	0.445590672	FALSE
1922	PF3D7_1227300.e1s2_8357	-0.09675743	-0.045319212	0.051438218	0.668109625	0.765269358	FALSE
1923	PF3D7_1227500.2o2_5357	0.002113809	-0.023995468	-0.026109277	0.853667498	0.898192745	FALSE
1924	PF3D7_1228100.iso1.exon2.amp1_2994	-0.108258127	0.166971901	0.275230028	0.077668366	0.445590672	FALSE
1925	PF3D7_1228100.iso1.exon3.amp1_2404	-0.062384978	0.01464002	0.077024998	0.334245073	0.531726473	FALSE
1926	PF3D7_1228300.iso1.exon1.amp1_2480	0.001454467	0.030160808	0.028706341	0.751763937	0.825674783	FALSE
1927	PF3D7_1228400.s2_4794	-0.110230398	0.037152954	0.147383352	0.400749623	0.571871068	FALSE
1928	PF3D7_1228600.e1s1_5187	-0.084639566	0.085315358	0.169954924	0.052263677	0.445590672	FALSE
1929	PF3D7_1228700.iso1.exon1.amp1_seg2_1438	-0.120821731	-0.011955839	0.108865892	0.336881613	0.534124666	FALSE
1930	PF3D7_1228800.e1s1_8000	-0.141818696	-0.007352894	0.134465802	0.448093572	0.602215367	FALSE
1931	PF3D7_1228800.e1s4_5484	-0.039909361	0.067971965	0.107881325	0.12631359	0.445590672	FALSE
1932	PF3D7_1229300.1o1_8528	-0.196355361	0.131843744	0.328199105	0.089555379	0.445590672	FALSE
1933	PF3D7_1229600.iso1.exon2.amp1_804	-0.233650737	-0.039076909	0.194573829	0.256476577	0.480722141	FALSE
1934	PF3D7_1229600.iso1.exon2.amp2_1093	-0.249896471	0.019367426	0.269263897	0.109688647	0.445590672	FALSE
1935	PF3D7_1230000.iso1.exon10.amp2_1646	-0.118521464	0.049971086	0.16849255	0.139852856	0.446174939	FALSE
1936	PF3D7_1230000.iso1.exon2.amp1_2063	-0.123066027	0.002703774	0.125769801	0.198186736	0.459216362	FALSE
1937	PF3D7_1230000.iso1.exon6.amp1_333	-0.215881609	0.038839228	0.254720837	0.027752804	0.445590672	FALSE
1938	PF3D7_1230400.5o5_7268	-0.070030573	0.020483412	0.090513985	0.371831842	0.556516845	FALSE
1939	PF3D7_1230600.iso1.exon1.amp1_71	-0.091876562	-0.063479204	0.028397357	0.652089257	0.753071778	FALSE
1940	PF3D7_1230700.1o1_6777	-0.194965997	0.02996824	0.224934237	0.13609732	0.446174939	FALSE
1941	PF3D7_1231000.iso1.exon7.amp1_4124	-0.24728687	0.009394216	0.256681086	0.106038201	0.445590672	FALSE
1942	PF3D7_1231400.iso1.exon4.amp1_924	-0.309147503	0.076642047	0.385789549	0.006453964	0.445590672	FALSE
1943	PF3D7_1231500.1o1_4656	-0.094449913	-0.0209653	0.073484613	0.394729603	0.568183678	FALSE
1944	PF3D7_1231600.iso1.exon1.amp2_1920	-0.141146938	0.07225307	0.213400008	0.118773	0.445590672	FALSE
1945	PF3D7_1232000.1o2_6457	-0.064258491	0.014725933	0.078984424	0.281713678	0.495475768	FALSE
1946	PF3D7_1232100.e1_8842	-0.066055748	0.02788677	0.093942518	0.35618843	0.54506478	FALSE
1947	PF3D7_1232100.e2_4807	-0.062326912	0.030960498	0.09328741	0.130851015	0.445590672	FALSE
1948	PF3D7_1232600.iso1.exon1.amp1_709	-0.146346717	0.055606063	0.20195278	0.06407711	0.445590672	FALSE
1949	PF3D7_1232700.iso1.exon1.amp1_3259	-0.096654921	0.057490762	0.154145682	0.274611366	0.492648926	FALSE
1950	PF3D7_1233200.iso2.exon1.amp1_3096	-0.209425868	0.039855089	0.249280957	0.172212789	0.451638999	FALSE
1951	PF3D7_1233200.iso2.exon1.amp2_seg2_2883	-0.148692622	0.036634505	0.185327127	0.155978287	0.446174939	FALSE
1952	PF3D7_1233200.iso2.exon1.amp3_seg1_1729	-0.279002635	0.043506838	0.322509473	0.082565666	0.445590672	FALSE
1953	PF3D7_1233300.s1_7401	0.063203007	0.093787666	0.030584659	0.778273556	0.843555876	FALSE
1954	PF3D7_1233300.s2_5950	-0.120490776	0.0041127	0.124603476	0.242050771	0.473629003	FALSE
1955	PF3D7_1233400.1o4_5291	-0.091785773	0.007330317	0.09911609	0.453452237	0.605178521	FALSE
1956	PF3D7_1233600.e1s3_8293	-0.066708948	0.027465972	0.09417492	0.428270221	0.590979183	FALSE
1957	PF3D7_1233700.iso1.exon1.amp1_1031	-0.111516126	-0.01638507	0.095131056	0.451045738	0.603878347	FALSE
1958	PF3D7_1233800.3o3_4664	0.010274014	0.024638729	0.014364716	0.888909445	0.92554849	FALSE
1959	PF3D7_1234300.2o2_6755	-0.138505059	0.069377999	0.207883058	0.066049141	0.445590672	FALSE
1960	PF3D7_1234600.iso1.exon1.amp1_2569	-0.027862171	0.02643481	0.054296981	0.533473328	0.665713935	FALSE
1961	PF3D7_1234600.iso1.exon1.amp2_3083	0.030269461	0.082329279	0.052059818	0.688387604	0.779894482	FALSE
1962	PF3D7_1234700.iso1.exon2.amp1_2955	-0.038594705	0.017622166	0.056216871	0.549098317	0.677374255	FALSE
1963	PF3D7_1234800.e1s1_7490	-0.095420623	-0.065410978	0.030009645	0.806440284	0.86538789	FALSE
1964	PF3D7_1234800.e1s2_8941	-0.117578011	0.156476076	0.274054088	0.031720307	0.445590672	FALSE
1965	PF3D7_1235000.iso1.exon2.amp1_3863	-0.10264248	-0.082780557	0.019861922	0.806037292	0.865386193	FALSE
1966	PF3D7_1235000.iso1.exon3.amp1_650	-0.177085427	-0.073124837	0.103960591	0.499720764	0.640409973	FALSE
1967	PF3D7_1235200.iso1.exon2.amp1_3400	-0.160120979	0.082348498	0.242469477	0.111843404	0.445590672	FALSE
1968	PF3D7_1235200.iso1.exon2.amp2_2539	-0.171064394	0.062973364	0.234037758	0.16916348	0.451638999	FALSE
1969	PF3D7_1235400.e1s2_5177	-0.049149818	0.023809079	0.072958897	0.172794966	0.451638999	FALSE
1970	PF3D7_1235800.iso1.exon4.amp1_2414	-0.036409156	0.055834073	0.092243229	0.213852815	0.459496777	FALSE
1971	PF3D7_1236000.1o1_6739	-0.024803316	0.030284504	0.05508782	0.750961977	0.825439978	FALSE
1972	PF3D7_1236100.e2s1_7758	-0.347807788	-0.042402233	0.305405555	0.24505763	0.475696555	FALSE
1973	PF3D7_1236200.iso1.exon1.amp2_4226	-0.097114508	0.11764023	0.214754738	0.097145213	0.445590672	FALSE
1974	PF3D7_1236300.1o1_5000	-0.047393721	0.064414444	0.111808164	0.141238336	0.446174939	FALSE
1975	PF3D7_1236500.1o1_7853	0.044768057	0.317423103	0.272655046	0.324486766	0.525020711	FALSE
1976	PF3D7_1237300.iso1.exon3.amp1_116	0.002485478	-0.056953834	-0.059439311	0.514880288	0.650912681	FALSE
1977	PF3D7_1237400.3o3_5573	-0.084274267	0.062812685	0.147086952	0.081507276	0.445590672	FALSE
1978	PF3D7_1237400.e3_7403	-0.092998098	0.031703996	0.124702094	0.196836772	0.459216362	FALSE
1979	PF3D7_1237900.iso1.exon1.amp1_4591	-0.029276126	0.0667172	0.095993327	0.455010893	0.606620724	FALSE
1980	PF3D7_1238200.iso1.exon1.amp1_3886	-0.007047497	0.001664618	0.008712116	0.8559202	0.899772585	FALSE
1981	PF3D7_1238400.iso1.exon4.amp1_630	-0.145244515	0.018873641	0.164118157	0.202962054	0.459216362	FALSE
1982	PF3D7_1238600.iso1.exon1.amp1_1581	-0.139682509	-0.000270545	0.139411964	0.341237737	0.536613947	FALSE
1983	PF3D7_1238800.e1s1_6061	-0.251646552	-0.007891832	0.243754721	0.233367535	0.467595484	FALSE
1984	PF3D7_1239200.e1s2_7139	-0.118932303	0.064288046	0.183220349	0.109769422	0.445590672	FALSE
1985	PF3D7_1239400.1o1_5240	-0.0267679	0.056292657	0.083060557	0.226914603	0.464090844	FALSE
1986	PF3D7_1239600.1o1_9028	-0.153974711	0.101937619	0.25591233	0.043752886	0.445590672	FALSE
1987	PF3D7_1239700.e1s1_5983	-0.141860442	0.033384328	0.17524477	0.091354241	0.445590672	FALSE
1988	PF3D7_1239800.s5_6570	-0.0153162	0.039643057	0.054959257	0.521014627	0.654727954	FALSE
1989	PF3D7_1240000.iso1.exon1.amp1_735	-0.07844744	0.013081967	0.091529407	0.451057006	0.603878347	FALSE
1990	PF3D7_1240300.iso1.exon1.amp2_2520	-0.013288528	0.049678778	0.062967306	0.373326742	0.556516845	FALSE
1991	PF3D7_1240300.iso1.exon2.amp1_4487	-0.221759455	0.019559645	0.2413191	0.014327739	0.445590672	FALSE
1992	PF3D7_1240400.iso1.exon2.amp1_1013	-0.029933017	0.125587122	0.155520139	0.272229695	0.492339431	FALSE
1993	PF3D7_1240600.iso1.exon2.amp1_2168	-0.10326759	-0.010280844	0.092986746	0.155244643	0.446174939	FALSE
1994	PF3D7_1240900.iso1.exon3.amp1_1880	-0.117866369	0.067558763	0.185425132	0.084522685	0.445590672	FALSE
1995	PF3D7_1240900.iso1.exon4.amp2_3972	-0.139930311	0.014747664	0.154677975	0.217574713	0.460244033	FALSE
1996	PF3D7_1241300.iso1.exon1.amp1_2759	-0.081740439	0.021224524	0.102964963	0.420296662	0.586616148	FALSE
1997	PF3D7_1241400.iso1.exon1.amp2_seg2_276	-0.2769096	0.051469772	0.328379372	0.024096211	0.445590672	FALSE
1998	PF3D7_1241700.e2s1_7179	-0.125998264	-0.018423398	0.107574866	0.245674342	0.475696555	FALSE
[truncated: 806 more rows]
