# Supplementary material for: Proteome-wide analysis of a malaria vaccine study reveals personalized humoral immune profiles in Tanzanian adults
Source: eLife. 2020 Jul 14;9:e53080. doi: 10.7554/eLife.53080 (PMC7386907; doi:10.7554/eLife.53080)
Supplement: Figure 4—source data 1. [file elife-53080-fig4-data1.csv]

CONTROL
	protein_ID	mean_seorpositivy_time1	mean_seorpositivy_time2	size_eff	log_FC	p_value	adj.p_value	is_threshold_reached
1	MAL13P1.303e4s1_6254	-0.526108248	-0.82176692	0.606382297	-0.295658672	0.130039615	0.635660862	FALSE
2	MAL8P1.143_14o15_5934	0.617126203	0.54585339	0.37714881	-0.071272813	0.321493388	0.635660862	FALSE
3	MAL8P1.143_3o15_6506	-0.023351617	-0.129782395	0.33276938	-0.106430778	0.377933018	0.635660862	FALSE
4	PF3D7_0100100.iso1.exon2.amp1_1871	0.078006427	-0.192589836	0.485959429	-0.270596263	0.211672645	0.635660862	FALSE
5	PF3D7_0100200.iso1.exon1.amp1_706	0.163694292	-0.099914694	0.436090883	-0.263608985	0.257214708	0.635660862	FALSE
6	PF3D7_0100300.iso1.exon1.amp1_1010	0.007979268	-0.163593641	0.371142848	-0.171572909	0.328717827	0.635660862	FALSE
7	PF3D7_0100300.iso1.exon2.amp1_1317	0.155370689	0.061670522	0.565738533	-0.093700167	0.153598465	0.635660862	FALSE
8	PF3D7_0100400.iso1.exon2.amp1_991	0.830467226	0.533642957	0.411843513	-0.296824269	0.28222879	0.635660862	FALSE
9	PF3D7_0100600.iso1.exon1.amp1_2163	0.728117544	0.530987754	0.360539838	-0.19712979	0.341785666	0.635660862	FALSE
10	PF3D7_0100800.iso1.exon2.amp1_133	0.409371751	0.308715437	0.208777253	-0.100656314	0.573410154	0.699974781	FALSE
11	PF3D7_0100900.iso1.exon1.amp1_2446	0.982599679	0.969210498	0.052868106	-0.013389182	0.885349743	0.912356001	FALSE
12	PF3D7_0101000.iso1.exon1.amp1_2157	-0.162097611	-0.411474751	0.453224694	-0.249377139	0.240695119	0.635660862	FALSE
13	PF3D7_0101100.iso1.exon1.amp1_3004	-0.598170272	-0.714761901	0.595794554	-0.116591629	0.135825652	0.635660862	FALSE
14	PF3D7_0101300.iso1.exon2.amp1_4146	0.677834356	0.361744874	0.699768521	-0.316089482	0.088280094	0.635660862	FALSE
15	PF3D7_0101600.iso1.exon1.amp1_3887	-0.063037945	-0.227061354	0.510593353	-0.164023409	0.19191499	0.635660862	FALSE
16	PF3D7_0101800.iso1.exon1.amp1_2719	1.207888861	1.010781627	0.451044901	-0.197107234	0.242744877	0.635660862	FALSE
17	PF3D7_0101900.iso1.exon1.amp1_123	0.619446463	0.542147117	0.152494754	-0.077299346	0.679207292	0.767323629	FALSE
18	PF3D7_0102200.e1s1_8021	-0.769934623	-0.995652095	0.436916606	-0.225717472	0.256396957	0.635660862	FALSE
19	PF3D7_0102200.e2s1_7477	1.144020547	0.95098249	0.516607802	-0.193038057	0.187349448	0.635660862	FALSE
20	PF3D7_0102200.e2s2_7188	1.434409891	1.291322536	0.308014769	-0.143087355	0.41252563	0.638828732	FALSE
21	PF3D7_0102500.e1s2_8945	-0.380470542	-0.545659904	0.304384793	-0.165189362	0.417787017	0.638830786	FALSE
22	PF3D7_0102600.2o3_6170	-0.543904629	-0.63962231	0.290599998	-0.095717681	0.438206573	0.643875771	FALSE
23	PF3D7_0102700.2o2_7571	-0.750432011	-0.872736098	0.227331516	-0.122304087	0.540712209	0.679698779	FALSE
24	PF3D7_0103400.e1s1_5925	0.015230111	-0.059566143	0.333445169	-0.074796254	0.3770201	0.635660862	FALSE
25	PF3D7_0103500.2o7_7085	-0.874534273	-1.074477829	0.494132589	-0.199943557	0.204925302	0.635660862	FALSE
26	PF3D7_0103800.e4s1_7155	-0.169617722	-0.382479163	0.317994571	-0.212861441	0.398309575	0.63867593	FALSE
27	PF3D7_0103900.1o1_9076	0.68699315	0.533650121	0.263385971	-0.153343029	0.480549719	0.654743154	FALSE
28	PF3D7_0104000.3o3_6106	-0.223867274	-0.414954307	0.449365629	-0.191087033	0.244334202	0.635660862	FALSE
29	PF3D7_0104100.1o2_5053	-0.81463892	-0.911916111	0.299345986	-0.097277191	0.425170421	0.640679519	FALSE
30	PF3D7_0104100.2o2_5342	-0.662644181	-0.737557056	0.269884472	-0.074912876	0.470195148	0.648960613	FALSE
31	PF3D7_0104600.e1s1_7213	-0.854200176	-0.841767183	0.051545885	0.012432993	0.888193727	0.914614474	FALSE
32	PF3D7_0105600.e2_4833	-0.826848048	-0.87905506	0.319217764	-0.052207012	0.396592273	0.63867593	FALSE
33	PF3D7_0105700.iso1.exon1.amp2_233	-0.970180751	-1.018159778	0.39459413	-0.047979027	0.301229067	0.635660862	FALSE
34	PF3D7_0105700.iso1.exon1.amp3_522	-0.428799392	-0.54120755	0.488693334	-0.112408158	0.209394071	0.635660862	FALSE
35	PF3D7_0105900.iso1.exon1.amp1_short_2005	-0.612094548	-0.792759158	0.391222873	-0.18066461	0.305062192	0.635660862	FALSE
36	PF3D7_0106200.iso1.exon1.amp1_3577	-0.44510205	-0.442010759	0.012804635	0.003091291	0.972120512	0.978752573	FALSE
37	PF3D7_0106500.iso1.exon1.amp1_2562	-0.553939192	-0.659474834	0.357201314	-0.105535642	0.345983691	0.635660862	FALSE
38	PF3D7_0107900.iso1.exon1.amp1_696	-0.767773765	-0.926141732	0.736344968	-0.158367967	0.075782655	0.635660862	FALSE
39	PF3D7_0108000.e1s1_7463	-0.52632124	-0.804570607	0.425794378	-0.278249367	0.26759883	0.635660862	FALSE
40	PF3D7_0108300.s1_7972	0.325963338	0.054780684	0.262396624	-0.271182654	0.482139412	0.655634777	FALSE
41	PF3D7_0108300.s2_7111	1.462441912	1.294723384	0.496789615	-0.167718527	0.202773333	0.635660862	FALSE
42	PF3D7_0108300.s3_7689	-0.057434507	-0.421278967	0.58043042	-0.36384446	0.144655048	0.635660862	FALSE
43	PF3D7_0108400.iso1.exon1.amp1_short_3733	-0.450072595	-0.700651387	0.442341433	-0.250578792	0.251079337	0.635660862	FALSE
44	PF3D7_0108400.iso1.exon7.amp1_45	-0.391604469	-0.521981819	0.410701405	-0.130377349	0.283455445	0.635660862	FALSE
45	PF3D7_0108600.iso1.exon4.amp1_4380	0.243819529	-0.033423124	0.541521622	-0.277242652	0.169467387	0.635660862	FALSE
46	PF3D7_0108600.iso1.exon5.amp1_634	-0.480399961	-0.597857057	0.913725469	-0.117457096	0.036238909	0.635660862	FALSE
47	PF3D7_0108700.e1s1_7776	-0.095866067	-0.110781946	0.069248827	-0.01491588	0.850280142	0.885655839	FALSE
48	PF3D7_0108800.iso1.exon6.amp1_1233	0.10224733	-0.026522264	0.507745418	-0.128769594	0.194111582	0.635660862	FALSE
49	PF3D7_0109200.iso1.exon1.amp1_2413	-0.609581376	-0.79391461	0.426115876	-0.184333234	0.267269326	0.635660862	FALSE
50	PF3D7_0109800.1o1_7336	-0.364125747	-0.531722123	0.503972043	-0.167596376	0.197056711	0.635660862	FALSE
51	PF3D7_0109900.iso2.exon16.amp1_324	-0.572911532	-0.800219387	0.383965322	-0.227307855	0.313448446	0.635660862	FALSE
52	PF3D7_0110000.1o1_8428	-0.300046416	-0.458106735	0.355511466	-0.158060319	0.348123882	0.635660862	FALSE
53	PF3D7_0110500.e1s2_5766	-0.102006362	-0.147677895	0.18667668	-0.045671534	0.613816578	0.724214033	FALSE
54	PF3D7_0110500.e1s3_5188	-1.223032491	-1.277168449	0.239706316	-0.054135957	0.519551464	0.671935065	FALSE
55	PF3D7_0110600.e1s1_6533	-0.695170663	-0.876116528	0.321761265	-0.180945865	0.393038876	0.637764995	FALSE
56	PF3D7_0110600.e3_5665	-0.291295721	-0.364900164	0.142913124	-0.073604443	0.69811645	0.779887859	FALSE
57	PF3D7_0110700.e1s1_7186	-0.618394847	-0.708023018	0.267686004	-0.08962817	0.473681154	0.650316423	FALSE
58	PF3D7_0110800.iso1.exon3.amp1_2717	-0.674175451	-0.640571777	0.067437576	0.033603674	0.854141637	0.888687625	FALSE
59	PF3D7_0111000.e1s2_6049	-0.904395596	-0.993832817	0.195778609	-0.089437221	0.59698877	0.714450069	FALSE
60	PF3D7_0111000.e5s1_5681	-0.368284021	-0.485173003	0.243913228	-0.116888982	0.512478271	0.668845721	FALSE
61	PF3D7_0111300.iso1.exon1.amp1_1701	-0.555706843	-0.69385859	0.645339458	-0.138151746	0.110706107	0.635660862	FALSE
62	PF3D7_0111500.e4s1_8619	0.457682979	0.323226123	0.255438181	-0.134456856	0.493419023	0.661068441	FALSE
63	PF3D7_0111500.e5s1_5099	-0.801202107	-0.959086107	0.327214184	-0.157884	0.385500717	0.635660862	FALSE
64	PF3D7_0111700.iso1.exon1.amp1_961	-0.387272442	-0.497005984	0.295588203	-0.109733542	0.430737238	0.641534251	FALSE
65	PF3D7_0112000.3o4_5862	0.35253865	0.119563357	0.36976355	-0.232975293	0.330395048	0.635660862	FALSE
66	PF3D7_0112100.1o1_6684	0.455317259	0.292725229	0.438453974	-0.16259203	0.25488032	0.635660862	FALSE
67	PF3D7_0112200.iso1.exon1.amp2_183	0.295104929	0.123364818	0.416193513	-0.171740111	0.2775971	0.635660862	FALSE
68	PF3D7_0113100.iso1.exon1.amp1_4475	-0.340808464	-0.519686701	0.499325612	-0.178878237	0.200738193	0.635660862	FALSE
69	PF3D7_0113100.iso1.exon2.amp1_4270	-0.755579277	-0.960539471	0.577137691	-0.204960195	0.146616095	0.635660862	FALSE
70	PF3D7_0113100.iso1.exon2.amp2_3349	-0.437646509	-0.552531447	0.424710022	-0.114884938	0.268712711	0.635660862	FALSE
71	PF3D7_0113300.2o2_5313	-1.452087991	-1.437494046	0.109950039	0.014593945	0.764867765	0.829667007	FALSE
72	PF3D7_0113400.2o2_8752	-0.392805846	-0.46821759	0.253629242	-0.075411743	0.496379512	0.661877712	FALSE
73	PF3D7_0113800.2o4_7664	-0.07392579	-0.23638773	0.332678754	-0.16246194	0.378055569	0.635660862	FALSE
74	PF3D7_0113800.3o4_7092	-0.221722263	-0.513034352	0.441736561	-0.291312089	0.251667557	0.635660862	FALSE
75	PF3D7_0113900.2o2_5532	-0.178329566	-0.495942696	0.353559626	-0.317613131	0.350608703	0.635660862	FALSE
76	PF3D7_0114000.e2s2_8371	-0.92592629	-0.964875911	0.186079421	-0.038949622	0.614929739	0.724214033	FALSE
77	PF3D7_0114100.iso1.exon1.amp1_2718	-0.2623633	-0.329899546	0.272629786	-0.067536246	0.465866489	0.648282697	FALSE
78	PF3D7_0115000.e1s1_6895	-0.253730586	-0.356904808	0.33981918	-0.103174222	0.368491465	0.635660862	FALSE
79	PF3D7_0115200.iso1.exon2.amp1_719	0.28922976	0.005405334	0.498872382	-0.283824426	0.201100568	0.635660862	FALSE
80	PF3D7_0115300.iso1.exon2.amp1_1279	-0.369805022	-0.528546038	0.384289599	-0.158741016	0.313069803	0.635660862	FALSE
81	PF3D7_0115400.iso1.exon2.amp1_2714	0.569877496	0.289648219	0.621745624	-0.280229277	0.12205824	0.635660862	FALSE
82	PF3D7_0115700.iso1.exon1.amp1_1583	0.444761029	0.259344754	0.351164677	-0.185416274	0.353676426	0.635660862	FALSE
83	PF3D7_0115700.iso1.exon2.amp2_4262	-0.776816264	-0.944366408	0.841494223	-0.167550143	0.048874558	0.635660862	FALSE
84	PF3D7_0200100 (renamed)_4770	0.258380214	0.095086591	0.347707597	-0.163293623	0.358141241	0.635660862	FALSE
85	PF3D7_0200100.iso1.exon2.amp1_2746	0.453833931	0.41063433	0.112489981	-0.043199601	0.759638237	0.825591324	FALSE
86	PF3D7_0200200.iso1.exon1.amp1_1284	0.76402284	0.4673213	0.58820406	-0.296701539	0.1401224	0.635660862	FALSE
87	PF3D7_0200400.iso1.exon1.amp1_1275	0.694678825	0.553326011	0.344923044	-0.141352815	0.361768983	0.635660862	FALSE
88	PF3D7_0200500.iso1.exon1.amp1_3303	0.793069853	0.329196964	0.636097887	-0.463872888	0.115026361	0.635660862	FALSE
89	PF3D7_0200600.iso1.exon1.amp1_2442	0.592519528	0.239761928	0.574913738	-0.3527576	0.147954648	0.635660862	FALSE
90	PF3D7_0200700.iso1.exon1.amp1_700	-0.117974037	-0.341649823	0.601372887	-0.223675786	0.132747491	0.635660862	FALSE
91	PF3D7_0200800.iso1.exon3.amp1_406	-0.114824758	-0.345187712	0.398183834	-0.230362954	0.297190848	0.635660862	FALSE
92	PF3D7_0201000.iso1.exon1.amp1_3595	-0.25477109	-0.333782158	0.238352689	-0.079011067	0.521840443	0.673627672	FALSE
93	PF3D7_0201200.iso1.exon2.amp1_3603	0.948027227	0.836199346	0.375443963	-0.111827881	0.323531111	0.635660862	FALSE
94	PF3D7_0201300.iso1.exon2.amp1_119	1.060823134	0.753873322	0.511411057	-0.306949812	0.191288445	0.635660862	FALSE
95	PF3D7_0201500.2o2_5533	-0.33910679	-0.306382089	0.153319401	0.032724701	0.67759113	0.766115133	FALSE
96	PF3D7_0201700.2o2_8813	-0.626595179	-0.696442957	0.2794729	-0.069847778	0.455195238	0.644181533	FALSE
97	PF3D7_0201800.iso1.exon1.amp1_4451	0.657001554	0.472670215	1.136228024	-0.184331339	0.014781213	0.635660862	FALSE
98	PF3D7_0201800.iso1.exon2.amp1_3566	-0.327151463	-0.460502981	0.454085807	-0.133351518	0.239889495	0.635660862	FALSE
99	PF3D7_0201900.e2s1_5490	-0.447807833	-0.508489931	0.236338481	-0.060682098	0.525258211	0.674988095	FALSE
100	PF3D7_0202000.e2s1_8364	-0.443726963	-0.768866913	0.512567534	-0.32513995	0.190405466	0.635660862	FALSE
101	PF3D7_0202300.2o2_8437	-0.804315049	-0.919921333	0.20298143	-0.115606284	0.583856431	0.706269815	FALSE
102	PF3D7_0202400.e1s1_5756	-0.204096111	-0.214627266	0.046760052	-0.010531155	0.898502095	0.922857097	FALSE
103	PF3D7_0202500.1o1_7250	0.951811105	0.822712458	0.284190568	-0.129098648	0.447937347	0.644181533	FALSE
104	PF3D7_0202600.iso2.exon1.amp1_2518	-0.502937036	-0.549595124	0.228666776	-0.046658088	0.538403678	0.678509624	FALSE
105	PF3D7_0202700.iso1.exon1.amp1_2186	-0.021445578	-0.155564788	0.498704928	-0.13411921	0.201234601	0.635660862	FALSE
106	PF3D7_0203000.iso1.exon1.amp1_538	-0.486033372	-0.598758946	0.516113594	-0.112725574	0.187720871	0.635660862	FALSE
107	PF3D7_0203000.iso1.exon1.amp2_1055	-0.001190718	-0.102593288	0.311969274	-0.10140257	0.406848833	0.638828732	FALSE
108	PF3D7_0203100.e1s1_6609	-0.228142274	-0.355892755	0.315252306	-0.127750481	0.402179507	0.638828732	FALSE
109	PF3D7_0203100.e2s2_7084	0.77172668	0.769844552	0.008324065	-0.001882128	0.981873428	0.98735552	FALSE
110	PF3D7_0203100.e2s3_5060	-0.167113561	-0.389681716	0.276274038	-0.222568155	0.460162486	0.644181533	FALSE
111	PF3D7_0203200.1o1_5016	-0.055678997	-0.232375324	0.407384109	-0.176696328	0.28704339	0.635660862	FALSE
112	PF3D7_0203800.iso1.exon12.amp1_2119	-0.348380491	-0.483315572	0.401236341	-0.13493508	0.293791908	0.635660862	FALSE
113	PF3D7_0204100.iso1.exon1.amp1_247	-0.430766699	-0.466758738	0.180886319	-0.035992038	0.624654197	0.732446382	FALSE
114	PF3D7_0204100.iso1.exon1.amp2_536	-0.247095579	-0.350177163	0.527300166	-0.103081584	0.179474675	0.635660862	FALSE
115	PF3D7_0204100.iso1.exon1.amp3_476	-0.203858934	-0.221048278	0.040100826	-0.017189344	0.91288021	0.932841147	FALSE
116	PF3D7_0204300.1o1_4751	-0.803752883	-0.927013069	0.671471928	-0.123260185	0.09932142	0.635660862	FALSE
117	PF3D7_0204500.1o1_5582	-0.240669096	-0.543240989	0.489044583	-0.302571893	0.209102904	0.635660862	FALSE
118	PF3D7_0204600.iso1.exon1.amp2_seg2_1153	-0.140364584	-0.371488955	0.558466303	-0.231124371	0.158213224	0.635660862	FALSE
119	PF3D7_0204800.iso1.exon1.amp1_3895	-0.740284957	-0.838625324	0.433584864	-0.098340368	0.259710105	0.635660862	FALSE
120	PF3D7_0206000.s2_8261	0.156259742	0.123902218	0.088652021	-0.032357524	0.809211465	0.855591609	FALSE
121	PF3D7_0206100.1o4_7281	-0.449895229	-0.726732761	0.324629745	-0.276837532	0.389059897	0.636849943	FALSE
122	PF3D7_0206200.1o1_7052	-0.717779447	-0.74331009	0.156847068	-0.025530643	0.670698142	0.761391737	FALSE
123	PF3D7_0206800_8292	1.780681632	1.799394092	0.046054578	0.01871246	0.90002347	0.923260985	FALSE
124	PF3D7_0206900.1.1o2_4674	0.206209423	-0.016320506	0.474101508	-0.222529929	0.221810894	0.635660862	FALSE
125	PF3D7_0206900.1.2o2_5836	-0.832494849	-0.957441842	0.328139228	-0.124946993	0.384232724	0.635660862	FALSE
126	PF3D7_0206900.1.e1_8561	-0.417699721	-0.679638764	0.803533778	-0.261939043	0.05724602	0.635660862	FALSE
127	PF3D7_0207000.1o2_6703	1.480621902	1.341794183	0.167995035	-0.138827719	0.649140214	0.746371276	FALSE
128	PF3D7_0207000.2o2_6414	-0.474077813	-0.591555267	0.230894364	-0.117477454	0.534565925	0.677439621	FALSE
129	PF3D7_0207000.e1_7116	1.586704573	1.359166946	0.276657208	-0.227537627	0.459565538	0.644181533	FALSE
130	PF3D7_0207100.s1_9173	-0.446828257	-0.4933665	0.256012489	-0.046538243	0.492481545	0.661068441	FALSE
131	PF3D7_0207200_6262	-0.619456416	-0.894315268	0.507000632	-0.274858853	0.194689742	0.635660862	FALSE
132	PF3D7_0207300.iso1.exon2.amp1_4172	-0.626249637	-0.849761493	0.734530028	-0.223511857	0.076359196	0.635660862	FALSE
133	PF3D7_0207300.iso1.exon5.amp1_1780	-0.321528	-0.531339989	0.457465115	-0.209811989	0.236750398	0.635660862	FALSE
134	PF3D7_0207400.4o4_5635	-0.529022768	-0.532708319	0.019628422	-0.003685551	0.957277506	0.966933043	FALSE
135	PF3D7_0207500.e1s1_8609	0.585364999	0.126351273	0.544541045	-0.459013726	0.167409535	0.635660862	FALSE
136	PF3D7_0207500.e3s1_8088	0.812226227	0.682170795	0.371155553	-0.130055433	0.328702409	0.635660862	FALSE
137	PF3D7_0207600.e2s1_8341	0.162097864	0.017271914	0.443397322	-0.14482595	0.25005533	0.635660862	FALSE
138	PF3D7_0207600.e4s1_8076	-0.347286776	-0.720443842	0.488896602	-0.373157066	0.209225528	0.635660862	FALSE
139	PF3D7_0207700.2o4_5642	0.080138223	-0.062755721	0.203121391	-0.142893944	0.583602892	0.706267807	FALSE
140	PF3D7_0207700.4o4_8238	-0.645922047	-0.626591327	0.081265492	0.01933072	0.824777815	0.866820463	FALSE
141	PF3D7_0208000.4o4_7083	-0.748656856	-0.81739443	0.471187206	-0.068737574	0.224366911	0.635660862	FALSE
142	PF3D7_0208100.iso2.exon10.amp1_1520	0.044377247	-0.255547618	0.550629349	-0.299924865	0.163329793	0.635660862	FALSE
143	PF3D7_0208100.iso2.exon13.amp1_3822	0.107699277	-0.080623152	0.484443493	-0.188322429	0.212945531	0.635660862	FALSE
144	PF3D7_0208700.iso2.exon4.amp1_1767	-0.381132532	-0.65905281	0.450079375	-0.277920277	0.243657597	0.635660862	FALSE
145	PF3D7_0208900.e1s3_5063	-1.088400316	-1.311320474	0.342266162	-0.222920158	0.365256638	0.635660862	FALSE
146	PF3D7_0209100.2o3_8219	-0.430634786	-0.603754317	0.489698202	-0.173119531	0.208562041	0.635660862	FALSE
147	PF3D7_0209300.1o2_6694	-0.474769181	-0.613951748	0.279155582	-0.139182566	0.455686317	0.644181533	FALSE
148	PF3D7_0209400.2o7_8465	-0.772313774	-1.01881634	0.321627278	-0.246502565	0.393225472	0.637764995	FALSE
149	PF3D7_0209800.e2_6830	0.376543348	0.228317846	0.295341298	-0.148225502	0.431104814	0.641534251	FALSE
150	PF3D7_0210200.iso1.exon2.amp2_seg1_2597	1.789396996	1.564005057	0.241738677	-0.22539194	0.516126702	0.670940785	FALSE
151	PF3D7_0210300.e2_9137	-0.718688741	-1.068164817	0.481075502	-0.349476076	0.21579775	0.635660862	FALSE
152	PF3D7_0210600.3o5_4701	-0.027398094	-0.124645652	0.284704382	-0.097247558	0.447151759	0.644181533	FALSE
153	PF3D7_0210700.1o1_6705	0.004316695	-0.03870042	0.156387074	-0.043017116	0.671595055	0.76210139	FALSE
154	PF3D7_0211100.iso1.exon1.amp1_3153	-0.687997515	-0.758917223	0.270533159	-0.070919708	0.469169881	0.648960613	FALSE
155	PF3D7_0211100.iso1.exon1.amp2_1349	-0.59596527	-0.559050783	0.139024504	0.036914487	0.70585764	0.784783832	FALSE
156	PF3D7_0211200.1o1_7850	0.041846131	-0.02520233	0.22983536	-0.067048461	0.536388294	0.677797556	FALSE
157	PF3D7_0211300.iso1.exon2.amp1_77	-0.520482326	-0.657375628	0.651508978	-0.136893302	0.107909502	0.635660862	FALSE
158	PF3D7_0211900.iso1.exon1.amp1_2450	-0.258628169	-0.48201124	0.623695592	-0.223383071	0.121079258	0.635660862	FALSE
159	PF3D7_0212200.iso1.exon2.amp1_4153	-0.410828449	-0.591488094	0.45308254	-0.180659645	0.240828336	0.635660862	FALSE
160	PF3D7_0212300.e3s1_4883	-0.471544634	-0.59805962	0.435333647	-0.126514986	0.25796658	0.635660862	FALSE
161	PF3D7_0212400.3o3_6803	-0.690245451	-0.818739654	0.447347632	-0.128494203	0.24625593	0.635660862	FALSE
162	PF3D7_0212500.iso1.exon1.amp1_3098	-0.702052465	-0.759024246	0.544253093	-0.056971781	0.167604791	0.635660862	FALSE
163	PF3D7_0212700.1o1_4996	0.31503429	-0.007544915	0.4369131	-0.322579205	0.256400425	0.635660862	FALSE
164	PF3D7_0212900.1o1_9032	-0.499895728	-0.765530098	0.649228502	-0.26563437	0.108935186	0.635660862	FALSE
165	PF3D7_0213000.1o1_4661	-0.658594764	-0.893593706	0.337450185	-0.234998943	0.371643964	0.635660862	FALSE
166	PF3D7_0213400.iso1.exon2.amp1_388	-0.500936003	-0.588273906	0.234486445	-0.087337903	0.528413165	0.676561879	FALSE
167	PF3D7_0213400.iso1.exon3.amp1_84	-0.230329214	-0.506138568	0.454283786	-0.275809353	0.239704603	0.635660862	FALSE
168	PF3D7_0213500.iso1.exon3.amp1_4447	-0.535948469	-0.675268647	0.508171967	-0.139320177	0.193781156	0.635660862	FALSE
169	PF3D7_0213900.iso1.exon1.amp2_1348	-0.654541991	-0.768913664	0.670553653	-0.114371673	0.099701459	0.635660862	FALSE
170	PF3D7_0214100.e1s1_6246	0.040887461	-0.238584965	0.425089828	-0.279472426	0.268322121	0.635660862	FALSE
171	PF3D7_0214300.iso1.exon1.amp1_2559	-0.221214517	-0.219571085	0.005402848	0.001643433	0.988233981	0.990810599	FALSE
172	PF3D7_0214300.iso1.exon1.amp2_2848	-0.492680861	-0.678340618	0.510460861	-0.185659758	0.192016682	0.635660862	FALSE
173	PF3D7_0215700.e2s2_6920	0.092745595	-0.086668606	0.414221969	-0.179414201	0.279688413	0.635660862	FALSE
174	PF3D7_0216400.1o1_7065	-0.766092167	-0.94654032	0.342625605	-0.180448153	0.364783302	0.635660862	FALSE
175	PF3D7_0216700.1.6o7_7390	-0.795646398	-0.956925058	0.556994519	-0.161278661	0.159162673	0.635660862	FALSE
176	PF3D7_0216700.iso2.exon6.amp1_679	-0.212683336	-0.55833773	0.55137798	-0.345654394	0.162834511	0.635660862	FALSE
177	PF3D7_0216900.1o1_7051	-0.225092326	-0.445951116	0.586635296	-0.220858789	0.141026234	0.635660862	FALSE
178	PF3D7_0217400.2o2_6962	0.077173297	0.276041938	0.210684505	0.198868641	0.56999643	0.697629852	FALSE
179	PF3D7_0217700.iso1.exon1.amp1_3848	0.231893225	-0.056683397	0.524384862	-0.288576623	0.181591439	0.635660862	FALSE
180	PF3D7_0217900.e1s1_7766	0.193491979	0.060981228	0.326183624	-0.132510751	0.386917031	0.635660862	FALSE
181	PF3D7_0218300.1o4_6226	-0.58304024	-0.751491482	0.327280598	-0.168451242	0.385409576	0.635660862	FALSE
182	PF3D7_0218300.2o4_6804	-0.595646106	-0.621095713	0.113118979	-0.025449608	0.758345251	0.824505655	FALSE
183	PF3D7_0218300.e2_6243	-0.337804127	-0.393111026	0.241107629	-0.055306899	0.517188553	0.671254206	FALSE
184	PF3D7_0219300.1o1_5228	-0.416742802	-0.445435699	0.091629407	-0.028692897	0.802962576	0.851238757	FALSE
185	PF3D7_0219400.iso1.exon2.amp1_1777	-1.411950772	-1.530831365	0.170927675	-0.118880593	0.643527331	0.74196161	FALSE
186	PF3D7_0219600.e1s1_8817	-0.525127223	-0.601043572	0.236978005	-0.075916349	0.524171527	0.674828724	FALSE
187	PF3D7_0219700.2o2_6131	0.150353806	0.00907721	0.270682217	-0.141276596	0.468934506	0.648960613	FALSE
188	PF3D7_0219900.2o2_6693	-0.164572697	-0.302571707	0.227017345	-0.13799901	0.541256261	0.679698779	FALSE
189	PF3D7_0220000.e2s1_7105	2.70423827	2.832666847	0.320921146	0.128428578	0.394209943	0.637915196	FALSE
190	PF3D7_0220000.e2s2_7394	1.678040482	1.330167147	0.358060417	-0.347873335	0.344899581	0.635660862	FALSE
191	PF3D7_0220100.e2s1_7661	-0.194010003	-0.35073126	0.485983971	-0.156721256	0.211652093	0.635660862	FALSE
192	PF3D7_0220600.2o2_6976	-0.311126952	-0.439161267	0.363335051	-0.128034315	0.338301619	0.635660862	FALSE
193	PF3D7_0221400.iso1.exon2.amp1_3871	-0.556914035	-0.692247504	0.445633477	-0.135333468	0.247898483	0.635660862	FALSE
194	PF3D7_0221600.1o1_5812	0.340672091	0.015242181	0.32340459	-0.32542991	0.390755671	0.636855536	FALSE
195	PF3D7_0222000.iso1.exon1.amp1_691	-0.151991326	-0.213232108	0.276925711	-0.061240782	0.459147549	0.644181533	FALSE
196	PF3D7_0222100.iso1.exon1.amp1_3007	0.659476487	0.364743199	1.167422222	-0.294733287	0.013085236	0.635660862	FALSE
197	PF3D7_0222500.iso1.exon2.amp1_987	0.710653196	0.50715919	0.286452488	-0.203494005	0.444486213	0.644181533	FALSE
198	PF3D7_0222600.iso1.exon2.amp1_1008	0.18689938	0.086689162	0.237640289	-0.100210219	0.52304766	0.674310638	FALSE
199	PF3D7_0222700.iso1.exon2.amp1_1289	-0.116402213	-0.301616636	0.461474459	-0.185214423	0.233072205	0.635660862	FALSE
200	PF3D7_0222800.iso1.exon2.amp1_1564	0.393287677	0.092214189	0.52255189	-0.301073487	0.182933911	0.635660862	FALSE
201	PF3D7_0222900.1o1_4649	-0.00264309	-0.106620753	0.270203551	-0.103977663	0.469690647	0.648960613	FALSE
202	PF3D7_0223100.iso1.exon2.amp1_989	-0.182172378	-0.386790801	0.538266403	-0.204618423	0.171711905	0.635660862	FALSE
203	PF3D7_0223200.iso1.exon2.amp1_3607	0.014246928	-0.072120924	0.299467602	-0.086367852	0.424991121	0.640679519	FALSE
204	PF3D7_0223300 (renamed)_6619	0.902581211	0.783188523	0.345275305	-0.119392687	0.361308499	0.635660862	FALSE
205	PF3D7_0223300.iso1.exon2.amp1_3611	1.163045894	1.151100262	0.02894985	-0.011945632	0.937032247	0.951281108	FALSE
206	PF3D7_0223400.iso1.exon2.amp1_1856	0.208164372	-0.006253206	0.392856005	-0.214417577	0.30320039	0.635660862	FALSE
207	PF3D7_0223500.iso1.exon1.amp1_3027	-0.476455991	-0.544270002	0.212798812	-0.067814011	0.566226032	0.695985097	FALSE
208	PF3D7_0223500.iso1.exon2.amp1_4551	-0.653240992	-0.832472333	0.576472594	-0.179231341	0.147015213	0.635660862	FALSE
209	PF3D7_0300100.iso1.exon2.amp1_138	1.167793438	1.207232667	0.099068992	0.039439229	0.787416885	0.843360177	FALSE
210	PF3D7_0300200.iso1.exon1.amp1_3012	0.637012071	0.423673928	0.357784904	-0.213338143	0.345246964	0.635660862	FALSE
211	PF3D7_0300400.iso1.exon1.amp1_401	1.083004849	0.75993204	0.565344942	-0.32307281	0.153844993	0.635660862	FALSE
212	PF3D7_0300500.iso1.exon1.amp1_134	-0.305193571	-0.553514221	0.408117724	-0.24832065	0.286246703	0.635660862	FALSE
213	PF3D7_0300700.iso1.exon2.amp1_3592	1.351774635	1.09913608	0.520781737	-0.252638555	0.184238909	0.635660862	FALSE
214	PF3D7_0300800.iso1.exon2.amp1_1572	-0.63629172	-0.727732356	0.47628735	-0.091440636	0.219910566	0.635660862	FALSE
215	PF3D7_0300900.iso1.exon2.amp1_1555	-0.042143209	-0.128859678	0.420195143	-0.086716469	0.273392475	0.635660862	FALSE
216	PF3D7_0301100.2o2_9008	-0.512867166	-0.518684312	0.015083478	-0.005817147	0.967161975	0.974459999	FALSE
217	PF3D7_0301200.iso1.exon3.amp1_short_4317	-0.482839776	-0.732793612	0.445952721	-0.249953836	0.247591865	0.635660862	FALSE
218	PF3D7_0301300.2o2_5567	-0.795387566	-0.77265193	0.090781434	0.022735637	0.804740738	0.852471866	FALSE
219	PF3D7_0301400.2o2_4671	-0.397234334	-0.396684911	0.001761759	0.000549423	0.996163189	0.996518581	FALSE
220	PF3D7_0301500.2o2_6419	-0.178174331	-0.219697517	0.177036845	-0.041523185	0.631914868	0.735834422	FALSE
221	PF3D7_0301700.e1s1_8026	-0.332851765	-0.643039648	0.388619576	-0.310187882	0.308049195	0.635660862	FALSE
222	PF3D7_0301700.e2s1_8045	0.074757734	-0.011715075	0.140220714	-0.08647281	0.703472275	0.783005107	FALSE
223	PF3D7_0301800.2o2_9014	-0.561122598	-0.691902866	0.401326207	-0.130780268	0.293692329	0.635660862	FALSE
224	PF3D7_0301900.1o1_7888	-0.209179837	-0.250301404	0.120020911	-0.041121567	0.744212734	0.812289804	FALSE
225	PF3D7_0302000.iso1.exon2.amp1_158	-0.48525501	-0.464486773	0.13495768	0.020768238	0.713993721	0.790216595	FALSE
226	PF3D7_0302200.1o9_6523	0.180605856	0.204257854	0.0828779	0.023651998	0.821372331	0.864862192	FALSE
227	PF3D7_0302200.9o9_6812	-0.241455137	-0.335400148	0.414977622	-0.093945011	0.278885309	0.635660862	FALSE
228	PF3D7_0302200.e1_5952	0.810185971	0.839050829	0.134975947	0.028864858	0.713957084	0.790216595	FALSE
229	PF3D7_0302200.e2_6826	-0.481035573	-0.605212579	0.243540494	-0.124177006	0.513102466	0.668845721	FALSE
230	PF3D7_0302200.e8_5663	-0.846450868	-0.939566029	0.186299475	-0.093115161	0.614519478	0.724214033	FALSE
231	PF3D7_0302200.e9_5390	-0.129239027	-0.399352634	0.366456231	-0.270113607	0.334444359	0.635660862	FALSE
232	PF3D7_0302500.e1s1_7185	1.433963283	1.307879306	0.328928251	-0.126083976	0.383153653	0.635660862	FALSE
233	PF3D7_0302500.e6s1_5136	-0.546591063	-0.854101437	0.427817508	-0.307510373	0.265531004	0.635660862	FALSE
234	PF3D7_0302500.e9s1_6314	0.353776985	0.063854284	0.425940228	-0.289922701	0.267449306	0.635660862	FALSE
235	PF3D7_0302800.e1s1_6041	-0.232732942	-0.320149867	0.336398226	-0.087416924	0.373050396	0.635660862	FALSE
236	PF3D7_0302900.e1s1_5473	-0.29894809	-0.492868257	0.305232183	-0.193920167	0.416554466	0.638828732	FALSE
237	PF3D7_0302900.e1s2_5184	-0.907159649	-1.100828082	0.268057902	-0.193668434	0.47309023	0.650316423	FALSE
238	PF3D7_0303200.e2s1_6620	0.067361163	0.040505303	0.159510434	-0.026855859	0.665516366	0.759197677	FALSE
239	PF3D7_0303700.e1s1_6024	0.029983132	-0.141010929	0.409169039	-0.170994061	0.285108189	0.635660862	FALSE
240	PF3D7_0303800.1o1_7036	-0.830461143	-0.865381528	0.283084619	-0.034920385	0.449631533	0.644181533	FALSE
241	PF3D7_0304000.e4s1_5769	-0.019775343	-0.181899111	0.252324408	-0.162123768	0.498522187	0.662347319	FALSE
242	PF3D7_0304100.1o1_7041	-0.407330716	-0.372564923	0.149649815	0.034765793	0.684796724	0.770666438	FALSE
243	PF3D7_0304200.e1s1_8348	0.003706988	0.087189431	0.231647369	0.083482443	0.533272461	0.677439621	FALSE
244	PF3D7_0304600_7131	-0.797247818	-0.798377163	0.008232095	-0.001129345	0.982073661	0.98735552	FALSE
245	PF3D7_0305100.e1s3_8820	-0.70044727	-0.765000988	0.350620956	-0.064553718	0.354375775	0.635660862	FALSE
246	PF3D7_0305200.iso1.exon1.amp1_3725	-0.600300947	-0.713911847	0.473351171	-0.1136109	0.222466535	0.635660862	FALSE
247	PF3D7_0305200.iso1.exon1.amp2_4239	-0.523266875	-0.622622609	0.349394559	-0.099355734	0.355957125	0.635660862	FALSE
248	PF3D7_0305500.e1s3_9107	-0.864858352	-1.09174332	0.378703605	-0.226884967	0.319643976	0.635660862	FALSE
249	PF3D7_0305600.1o1_7038	0.093241546	-0.193880434	0.59560256	-0.28712198	0.135932785	0.635660862	FALSE
250	PF3D7_0306200.5o5_6140	-0.269980133	-0.441288584	0.336817134	-0.171308451	0.372489848	0.635660862	FALSE
251	PF3D7_0307300.1o1_7034	-0.508147628	-0.602175167	0.329673976	-0.094027539	0.38213589	0.635660862	FALSE
252	PF3D7_0307500.iso1.exon4.amp1_417	0.072596337	-0.027711324	0.165366434	-0.100307662	0.654192055	0.75086145	FALSE
253	PF3D7_0307700.e3s2_7088	0.438871365	0.36965776	0.276375762	-0.069213605	0.460003956	0.644181533	FALSE
254	PF3D7_0308000.1o1_8767	0.064750763	-0.069334493	0.230086151	-0.134085256	0.535956379	0.677749668	FALSE
255	PF3D7_0308100.iso1.exon1.amp2_3062	-0.663106672	-0.626070575	0.159512093	0.037036097	0.665513145	0.759197677	FALSE
256	PF3D7_0308300.e1s1_6328	-0.503980686	-0.580301799	0.352803931	-0.076321113	0.351574444	0.635660862	FALSE
257	PF3D7_0308700.iso1.exon1.amp1_2745	0.424247869	0.5928122	0.34693746	0.168564331	0.359141769	0.635660862	FALSE
258	PF3D7_0308900.iso1.exon1.amp2_1908	-0.44046487	-0.620227286	0.735257079	-0.179762416	0.076127716	0.635660862	FALSE
259	PF3D7_0309000.iso1.exon1.amp1_144	0.302374255	0.33448636	0.094118398	0.032112104	0.797750539	0.847680973	FALSE
260	PF3D7_0309100.iso1.exon5.amp1_2930	-0.013417603	-0.133208281	0.426619353	-0.119790677	0.266753998	0.635660862	FALSE
261	PF3D7_0309200.iso1.exon3.amp2_2542	-0.528713495	-0.585491804	0.277201672	-0.056778309	0.458718222	0.644181533	FALSE
262	PF3D7_0309600.e1s1_5717	-0.834723907	-0.84678622	0.061474992	-0.012062313	0.866883302	0.898942596	FALSE
263	PF3D7_0309900.iso1.exon2.amp1_655	-0.370145778	-0.59095915	0.706801724	-0.220813373	0.085728347	0.635660862	FALSE
264	PF3D7_0310200.e1s3_7089	-0.21441204	-0.342794915	0.261587721	-0.128382875	0.483441766	0.65565006	FALSE
265	PF3D7_0310300.e1s1_6333	-0.146961653	-0.533062431	0.886966818	-0.386100778	0.040472557	0.635660862	FALSE
266	PF3D7_0310300.e1s2_6327	-0.069860115	-0.247493952	0.397455238	-0.177633837	0.298006878	0.635660862	FALSE
267	PF3D7_0310500.e1s1_7495	-0.839611672	-0.935010131	0.335221646	-0.095398459	0.374628224	0.635660862	FALSE
268	PF3D7_0310500.e1s2_7206	0.229159602	0.004669308	0.294388256	-0.224490294	0.432525732	0.641615803	FALSE
269	PF3D7_0310500.e1s3_8946	-0.010190856	-0.213567395	0.517284758	-0.203376539	0.186841757	0.635660862	FALSE
270	PF3D7_0310700.2o2_7252	-0.686351979	-0.882240237	0.37317503	-0.195888257	0.326259033	0.635660862	FALSE
271	PF3D7_0310800.1o1_6383	-0.921408864	-1.063424863	0.229035054	-0.142015998	0.53776803	0.678300838	FALSE
272	PF3D7_0310800_9158	-0.212436217	-0.406944138	0.380661339	-0.194507921	0.317327409	0.635660862	FALSE
273	PF3D7_0311100.iso1.exon3.amp1_1794	-0.133463322	-0.218012654	0.598796042	-0.084549332	0.134161127	0.635660862	FALSE
274	PF3D7_0311400.iso1.exon1.amp1_2120	0.047088474	-0.253854833	0.494722403	-0.300943307	0.204445854	0.635660862	FALSE
275	PF3D7_0311400.iso1.exon2.amp1_782	0.513717353	0.447383093	0.156912487	-0.06633426	0.670570633	0.761391737	FALSE
276	PF3D7_0311400.iso1.exon2.amp2_1071	0.137274486	0.052132623	0.214643785	-0.085141864	0.562947955	0.694657009	FALSE
277	PF3D7_0311600.2o5_9087	-0.462394765	-0.701436994	0.49986343	-0.239042229	0.200308945	0.635660862	FALSE
278	PF3D7_0311700.1o15_9041	0.036582966	-0.137962784	0.503987313	-0.17454575	0.197044713	0.635660862	FALSE
279	PF3D7_0311800.e3_7124	-0.500197417	-0.638936447	0.469780706	-0.13873903	0.225609687	0.635660862	FALSE
280	PF3D7_0311900.1o1_5052	-0.580085667	-0.642099716	0.242223712	-0.062014049	0.515311487	0.670502743	FALSE
281	PF3D7_0312200.iso1.exon1.amp1_3720	-0.673555616	-0.849762435	0.582844849	-0.176206819	0.143232727	0.635660862	FALSE
282	PF3D7_0312300.1o1_7872	-0.613542604	-0.70923095	0.388046697	-0.095688346	0.308709684	0.635660862	FALSE
283	PF3D7_0312400.2o7_8753	0.329319056	0.136730919	0.314953291	-0.192588137	0.402603149	0.638828732	FALSE
284	PF3D7_0313000.1o2_7579	-0.555446338	-0.64666763	0.807245559	-0.091221292	0.056366793	0.635660862	FALSE
285	PF3D7_0313100.1o4_8505	-0.516537713	-0.634710873	0.429812058	-0.11817316	0.263505593	0.635660862	FALSE
286	PF3D7_0313200.1o1_9000	-0.454253442	-0.579623858	0.344240151	-0.125370416	0.362662959	0.635660862	FALSE
287	PF3D7_0313300.iso1.exon5.amp1_931	-0.558449484	-0.772631298	0.481026143	-0.214181814	0.2158398	0.635660862	FALSE
288	PF3D7_0313400.iso1.exon1.amp1_445	-0.288011685	-0.406652887	0.52127304	-0.118641202	0.183875867	0.635660862	FALSE
289	PF3D7_0313600.5o6_7614	-0.813811388	-0.817179992	0.016771903	-0.003368604	0.96348912	0.971807012	FALSE
290	PF3D7_0313700.iso1.exon2.amp1_2360	-0.334466402	-0.418243311	0.339791998	-0.083776909	0.368527521	0.635660862	FALSE
291	PF3D7_0313800.5o5_7343	-0.295004594	-0.408546677	0.839969925	-0.113542083	0.049185364	0.635660862	FALSE
292	PF3D7_0315100.e1s1_7183	-0.826168709	-0.971646082	0.268470635	-0.145477373	0.472435005	0.650316423	FALSE
293	PF3D7_0315200.iso1.exon1.amp3_2789	0.004492168	-0.085831538	0.167211428	-0.090323706	0.650644154	0.74709509	FALSE
294	PF3D7_0315400.1o1_8147	1.168888204	1.187679555	0.043321051	0.018791351	0.905922601	0.926744609	FALSE
295	PF3D7_0315900.2o2_5837	-0.087438456	-0.231360432	0.369137223	-0.143921976	0.331158895	0.635660862	FALSE
296	PF3D7_0316300.1.e3_6827	-0.945954142	-1.135408215	0.284938086	-0.189454074	0.446794759	0.644181533	FALSE
297	PF3D7_0316500.e1s1_5735	0.481799353	0.303994391	0.469724544	-0.177804962	0.225659437	0.635660862	FALSE
298	PF3D7_0317200.iso1.exon1.amp1_4590	-0.640887366	-0.750877372	1.008046853	-0.109990007	0.024646516	0.635660862	FALSE
299	PF3D7_0317200.iso1.exon1.amp2_3936	0.009925351	-0.166969748	0.763859414	-0.176895098	0.067555978	0.635660862	FALSE
300	PF3D7_0317300.s2_8011	-0.330760818	-0.372640904	0.177727484	-0.041880085	0.630608979	0.73492418	FALSE
301	PF3D7_0317300.s3_7150	0.68996847	0.499012347	0.505732119	-0.190956123	0.195678018	0.635660862	FALSE
302	PF3D7_0317400.iso1.exon1.amp1_643	-0.270937332	-0.441888485	0.411394995	-0.170951154	0.282709984	0.635660862	FALSE
303	PF3D7_0317400.iso1.exon2.amp1_3902	-0.598997416	-0.706052247	0.50083861	-0.107054831	0.199532714	0.635660862	FALSE
304	PF3D7_0317500.iso1.exon1.amp1_3396	-0.391231896	-0.480865287	0.289114344	-0.089633391	0.440448752	0.644181533	FALSE
305	PF3D7_0317500.iso1.exon2.amp1_942	-0.404124955	-0.52583485	0.360370009	-0.121709895	0.34199825	0.635660862	FALSE
306	PF3D7_0317700.e1s1_8247	-0.952790459	-1.009341114	0.337854113	-0.056550655	0.371104998	0.635660862	FALSE
307	PF3D7_0317700.e9s1_9185	-0.241595799	-0.329899532	0.248338448	-0.088303733	0.505104796	0.664624048	FALSE
308	PF3D7_0317800.1o1_7265	-0.778728291	-0.912025181	0.318115751	-0.13329689	0.3981392	0.63867593	FALSE
309	PF3D7_0318200.e1s1_8532	-0.807366871	-0.958917278	0.248050642	-0.151550407	0.505582259	0.664751529	FALSE
310	PF3D7_0318200.e1s2_8534	-0.614944068	-0.749944562	0.338316254	-0.135000494	0.370489087	0.635660862	FALSE
311	PF3D7_0318200.e1s3_5066	0.776580497	0.67178479	0.522329502	-0.104795707	0.1830974	0.635660862	FALSE
312	PF3D7_0318500.iso1.exon1.amp3_2251	0.627978253	0.422766743	0.361692145	-0.20521151	0.340345996	0.635660862	FALSE
313	PF3D7_0318500.iso1.exon1.amp4_222	-0.259487274	-0.356686442	0.120865461	-0.097199168	0.74249052	0.811673847	FALSE
314	PF3D7_0318500.iso1.exon1.amp5_162	-0.428187448	-0.534287532	0.490203075	-0.106100084	0.208145113	0.635660862	FALSE
315	PF3D7_0318600.iso1.exon1.amp1_836	-0.087946633	-0.288796005	0.455397621	-0.200849371	0.238666685	0.635660862	FALSE
316	PF3D7_0318600.iso1.exon1.amp2_200	-0.434319358	-0.658392821	0.559864447	-0.224073463	0.15731614	0.635660862	FALSE
317	PF3D7_0319000.iso1.exon1.amp1_3432	-0.034624757	-0.293885087	0.664066852	-0.25926033	0.102426704	0.635660862	FALSE
318	PF3D7_0319100.1o1_7545	-0.519095215	-0.615642313	0.159686354	-0.096547098	0.665174786	0.759197677	FALSE
319	PF3D7_0319700.e1s1_5124	-0.492633574	-0.590700708	0.371675721	-0.098067135	0.328071669	0.635660862	FALSE
320	PF3D7_0319900.1o1_4676	0.353120973	0.153040292	0.454602	-0.200080681	0.23940768	0.635660862	FALSE
321	PF3D7_0320200.iso1.exon1.amp1_3627	-0.307187934	-0.530610608	0.830766307	-0.223422674	0.051105383	0.635660862	FALSE
322	PF3D7_0320400.e1s3_6638	-0.520546079	-0.666376715	0.351425565	-0.145830636	0.353341245	0.635660862	FALSE
323	PF3D7_0320500.1o1_8174	-0.241191355	-0.419105837	0.298086102	-0.177914482	0.427031068	0.640696288	FALSE
324	PF3D7_0320800.e1s1_8898	-0.123770233	-0.101669022	0.05899936	0.022101211	0.872186309	0.902772393	FALSE
325	PF3D7_0320800.e2s1_4867	-0.270990555	-0.47012311	0.309873692	-0.199132555	0.409849956	0.638828732	FALSE
326	PF3D7_0321500.iso1.exon1.amp1_841	-0.379394177	-0.469356589	0.310207434	-0.089962412	0.40937092	0.638828732	FALSE
327	PF3D7_0321600.e1_7117	-0.286160618	-0.396095304	0.60358641	-0.109934686	0.131544433	0.635660862	FALSE
328	PF3D7_0321800.iso1.exon1.amp1_234	-0.302682578	-0.325564205	0.230962154	-0.022881627	0.534449399	0.677439621	FALSE
329	PF3D7_0322100.1o1_9067	-0.11260578	-0.329840836	0.368612891	-0.217235056	0.331799429	0.635660862	FALSE
330	PF3D7_0322900.e2_5953	-0.35092384	-0.472483591	0.32039604	-0.121559751	0.394943217	0.637915196	FALSE
331	PF3D7_0323300.1o1_6145	-0.01505756	-0.119742735	0.334542577	-0.104685175	0.375541173	0.635660862	FALSE
332	PF3D7_0323600.e1_5672	-0.43974942	-0.557983965	0.344517561	-0.118234545	0.362299597	0.635660862	FALSE
333	PF3D7_0323800.e2s1_7381	-0.747779214	-0.948479294	0.417202423	-0.200700081	0.276531952	0.635660862	FALSE
334	PF3D7_0324100.2o2_5248	0.266951893	0.126188712	0.606055239	-0.140763181	0.130214799	0.635660862	FALSE
335	PF3D7_0324400.iso1.exon2.amp1_1578	-0.109387234	-0.299278303	0.521844413	-0.189891068	0.183454472	0.635660862	FALSE
336	PF3D7_0324600.iso1.exon2.amp1_3003	1.002705172	0.782009814	0.531260635	-0.220695358	0.176634974	0.635660862	FALSE
337	PF3D7_0324800.iso1.exon2.amp1_2158	0.300515821	0.024064845	0.548876679	-0.276450976	0.164494767	0.635660862	FALSE
338	PF3D7_0324900.iso1.exon1.amp1_2456	0.811324275	0.909263887	0.164130106	0.097939612	0.656574881	0.753111064	FALSE
339	PF3D7_0324900.iso1.exon2.amp1_2239	0.199658815	0.03141941	0.537603132	-0.168239404	0.172172564	0.635660862	FALSE
340	PF3D7_0400100.iso1.exon1.amp1_3682	-0.169568528	-0.237520412	0.337570473	-0.067951883	0.3714834	0.635660862	FALSE
341	PF3D7_0400100.iso1.exon1.amp2_3971	-0.152067905	-0.294423606	0.636670528	-0.1423557	0.114754015	0.635660862	FALSE
342	PF3D7_0400100.iso1.exon1.amp3_4260	-0.322502276	-0.352034891	0.160688204	-0.029532616	0.663231137	0.758442132	FALSE
343	PF3D7_0400100.iso1.exon2.amp1_4192	-0.104675223	-0.298406246	0.421599446	-0.193731023	0.271929621	0.635660862	FALSE
344	PF3D7_0400200.iso1.exon1.amp1_1876	0.752877936	0.528881585	0.447713234	-0.223996352	0.24590681	0.635660862	FALSE
345	PF3D7_0400300.iso1.exon1.amp1_2731	0.019546419	-0.228790963	0.504664719	-0.248337382	0.196513093	0.635660862	FALSE
346	PF3D7_0400400.iso1.exon1.amp1_1294	0.710087796	0.504054275	0.297915688	-0.206033521	0.427283187	0.640696288	FALSE
347	PF3D7_0400500.iso1.exon2.amp1_998	0.333775101	0.057257703	0.64080693	-0.276517398	0.112805086	0.635660862	FALSE
348	PF3D7_0400700.iso1.exon1.amp1_992	0.122594287	-0.223756807	0.627261469	-0.346351094	0.119308389	0.635660862	FALSE
349	PF3D7_0400800.iso1.exon1.amp1_3008	1.520886738	1.139496129	0.820020629	-0.381390609	0.053444133	0.635660862	FALSE
350	PF3D7_0400900.iso1.exon1.amp1_1573	0.259126342	0.019004655	0.402217524	-0.240121687	0.292706171	0.635660862	FALSE
351	PF3D7_0401000.iso1.exon1.amp1_2432	1.723223372	1.663193542	0.227940368	-0.06002983	0.539658812	0.679480606	FALSE
352	PF3D7_0401200.iso1.exon2.amp1_2164	0.815490966	0.510016033	0.52627318	-0.305474933	0.180217785	0.635660862	FALSE
353	PF3D7_0401300.iso1.exon2.amp1_3599	0.337026347	0.180535134	0.433794372	-0.156491213	0.259500701	0.635660862	FALSE
354	PF3D7_0401400.iso1.exon2.amp1_1862	0.409821054	0.170522433	0.494769575	-0.239298621	0.204407552	0.635660862	FALSE
355	PF3D7_0401600.iso2.exon3.amp1_3896	-0.246815541	-0.338583421	0.551452387	-0.09176788	0.162785359	0.635660862	FALSE
356	PF3D7_0401900.1o1_7666	1.069943304	0.77161566	0.528413402	-0.298327644	0.178672304	0.635660862	FALSE
357	PF3D7_0402000 (renamed)_9038	-0.303000523	-0.439789695	0.400439853	-0.136789173	0.2946757	0.635660862	FALSE
358	PF3D7_0402000.e1s1_9149	-0.531739878	-0.662304914	0.302407305	-0.130565036	0.420673559	0.639515524	FALSE
359	PF3D7_0402100.e2s1_6909	-0.513362186	-0.549631477	0.207705561	-0.036269291	0.575333546	0.701711728	FALSE
360	PF3D7_0402200 (renamed)_8951	0.081706413	0.169670744	0.338286505	0.087964331	0.370528712	0.635660862	FALSE
361	PF3D7_0402400.2o2_4672	0.43657899	0.202269433	0.620406121	-0.234309557	0.122735113	0.635660862	FALSE
362	PF3D7_0402600.iso1.exon1.amp1_4449	0.278559165	0.106537669	0.426965107	-0.172021496	0.26640059	0.635660862	FALSE
363	PF3D7_0403500.1o1_6443	-0.554709534	-0.688639429	0.260785334	-0.133929896	0.484735942	0.656183308	FALSE
364	PF3D7_0403900.iso1.exon1.amp1_1235	-0.29489169	-0.5562598	0.429428585	-0.26136811	0.263893983	0.635660862	FALSE
365	PF3D7_0404100.iso1.exon1.amp1_2815	-0.859592654	-0.808894894	0.127633367	0.05069776	0.728747193	0.802279988	FALSE
366	PF3D7_0404100.iso1.exon2.amp1_674	-0.255382263	-0.406343787	0.350846185	-0.150961524	0.354085948	0.635660862	FALSE
367	PF3D7_0404200.iso1.exon2.amp1_2698	-0.765752557	-0.844739808	0.157217195	-0.078987251	0.669976874	0.761391737	FALSE
368	PF3D7_0404600.s3_7434	1.33882729	1.1640524	0.765261049	-0.174774889	0.067161689	0.635660862	FALSE
369	PF3D7_0404600.s5_7440	-0.143072489	-0.243407783	0.22685997	-0.100335294	0.541528913	0.679698779	FALSE
370	PF3D7_0404700.1o2_6213	-0.308633783	-0.469873119	0.568162903	-0.161239336	0.152088021	0.635660862	FALSE
371	PF3D7_0404800.1o2_6179	-0.447978757	-0.519568946	0.22303971	-0.071590188	0.548173259	0.682842212	FALSE
372	PF3D7_0404800.e1_7407	-0.319424051	-0.435967512	0.329726472	-0.116543461	0.38206432	0.635660862	FALSE
373	PF3D7_0405300.iso1.exon1.amp1_1116	0.334889276	0.275446643	0.180795028	-0.059442634	0.624825872	0.732446382	FALSE
374	PF3D7_0405300.iso1.exon1.amp2_3940	-0.493998351	-0.557236581	0.212419103	-0.06323823	0.566902077	0.695985097	FALSE
375	PF3D7_0405400.e2s1_6356	0.365100887	0.18204472	0.810164728	-0.183056167	0.055684948	0.635660862	FALSE
376	PF3D7_0405400.e2s4_7512	-0.424023616	-0.572928223	0.492086936	-0.148904606	0.206595928	0.635660862	FALSE
377	PF3D7_0405600.2o9_6125	-0.564145061	-0.5912237	0.084827033	-0.02707864	0.817261182	0.862152127	FALSE
378	PF3D7_0405700.iso1.exon1.amp1_1975	-0.242400954	-0.412753851	0.246719302	-0.170352897	0.507794712	0.666287493	FALSE
379	PF3D7_0405700.iso1.exon1.amp3_181	-0.538262446	-0.547262561	0.045985313	-0.009000115	0.900172868	0.923260985	FALSE
380	PF3D7_0405900.e3s1_6875	-0.324060454	-0.444902674	0.320550057	-0.12084222	0.394728038	0.637915196	FALSE
381	PF3D7_0406200_8002	1.278453338	0.99421607	0.383425778	-0.284237268	0.314079263	0.635660862	FALSE
382	PF3D7_0406500.iso1.exon2.amp4_169	-0.652978369	-0.680808881	0.060208162	-0.027830512	0.869596057	0.901089188	FALSE
383	PF3D7_0406700.iso1.exon9.amp1_3850	-0.186279233	-0.467817526	0.463740026	-0.281538293	0.231015767	0.635660862	FALSE
384	PF3D7_0406800.iso1.exon3.amp1_3542	-0.229738437	-0.35468065	0.410683702	-0.124942213	0.283474493	0.635660862	FALSE
385	PF3D7_0406900.4o8_8241	-0.389060953	-0.59807811	0.460502175	-0.209017157	0.233959603	0.635660862	FALSE
386	PF3D7_0407000.1o1_5004	-1.022478408	-1.062525239	0.206312991	-0.040046832	0.577838405	0.702244096	FALSE
387	PF3D7_0407200.iso1.exon5.amp1_341	-0.162925672	-0.426142813	0.362661855	-0.263217142	0.339138151	0.635660862	FALSE
388	PF3D7_0407700.e2s1_5470	-0.800650921	-0.93498319	0.30726262	-0.134332269	0.413611848	0.638828732	FALSE
389	PF3D7_0407700.e2s2_6343	0.13672725	-0.099021093	0.65900668	-0.235748343	0.104602707	0.635660862	FALSE
390	PF3D7_0408000.iso1.exon1.amp1_683	-0.522209201	-0.559803717	0.317656759	-0.037594515	0.398784813	0.63870662	FALSE
391	PF3D7_0408600_7148	-0.459808273	-0.568397994	0.106688432	-0.108589721	0.771602443	0.835034061	FALSE
392	PF3D7_0408700.e3s1_8902	-0.297720339	-0.474647299	0.399303618	-0.17692696	0.295940254	0.635660862	FALSE
393	PF3D7_0408700.e5s1_7160	-0.724986539	-1.003626421	0.447977649	-0.278639882	0.24565458	0.635660862	FALSE
394	PF3D7_0408700.e6s1_5713	-0.676232445	-0.658235463	0.056767404	0.017996982	0.876973402	0.906389023	FALSE
395	PF3D7_0408900.1.e3s1_7464	-0.296308842	-0.42296772	0.377986926	-0.126658878	0.320495396	0.635660862	FALSE
396	PF3D7_0409200.iso1.exon1.amp1_3910	-0.587450626	-0.732273741	0.906265628	-0.144823115	0.037370928	0.635660862	FALSE
397	PF3D7_0409500.2o2_7867	0.006907905	-0.210342097	0.414604129	-0.217250002	0.279282016	0.635660862	FALSE
398	PF3D7_0409600.iso1.exon1.amp1_551	-0.26983653	-0.292344154	0.077070333	-0.022507624	0.833656997	0.873532967	FALSE
399	PF3D7_0409600.iso1.exon1.amp2_1059	-0.324852861	-0.393004722	0.259835714	-0.068151861	0.486270561	0.657197163	FALSE
400	PF3D7_0409900.7o7_7316	-0.479410106	-0.688719632	0.354443575	-0.209309527	0.349481675	0.635660862	FALSE
401	PF3D7_0410300.1o2_7946	-0.071595138	-0.184941844	0.519866705	-0.113346706	0.184916792	0.635660862	FALSE
402	PF3D7_0410500.iso1.exon1.amp1_4441	-0.760472619	-0.898602904	0.467572558	-0.138130285	0.227572929	0.635660862	FALSE
403	PF3D7_0410800.iso1.exon1.amp2_1340	-0.334996558	-0.465194349	0.243205399	-0.130197792	0.513664045	0.66898002	FALSE
404	PF3D7_0410900.1o1_6799	0.687623304	0.606889707	0.501383596	-0.080733598	0.199100083	0.635660862	FALSE
405	PF3D7_0411000.iso1.exon1.amp1_3723	-0.18873493	-0.344879494	0.35836845	-0.156144564	0.344511518	0.635660862	FALSE
406	PF3D7_0411700.1o1_4939	-0.23456959	-0.361361484	0.35827325	-0.126791894	0.344631416	0.635660862	FALSE
407	PF3D7_0411900.iso1.exon1.amp1_724	-0.59302597	-0.643118639	0.365696775	-0.050092668	0.335379712	0.635660862	FALSE
408	PF3D7_0411900.iso1.exon2.amp2_seg2_2021	-0.600678825	-0.921220736	0.670805503	-0.32054191	0.099597087	0.635660862	FALSE
409	PF3D7_0412000.1o1_7937	-0.260187738	-0.590212316	0.586558876	-0.330024578	0.141070403	0.635660862	FALSE
410	PF3D7_0412400.iso1.exon1.amp1_3330	-0.071880278	-0.314083072	1.295617126	-0.242202794	0.008021775	0.635660862	FALSE
411	PF3D7_0412400.iso1.exon2.amp2_3106	-0.61039391	-0.69125832	0.420273107	-0.08086441	0.273311088	0.635660862	FALSE
412	PF3D7_0412700.iso1.exon1.amp1_2752	0.017997269	-0.142141282	0.428995396	-0.160138551	0.264333308	0.635660862	FALSE
413	PF3D7_0412700.iso1.exon2.amp2_1081	-0.079620686	-0.127779537	0.332600384	-0.04815885	0.378161573	0.635660862	FALSE
414	PF3D7_0412900.iso1.exon1.amp1_435	1.257869872	1.178973166	0.134531308	-0.078896706	0.714849057	0.790704834	FALSE
415	PF3D7_0412900.iso1.exon2.amp2_3385	-0.975411101	-1.32690941	0.82571776	-0.351498309	0.052190903	0.635660862	FALSE
416	PF3D7_0413200.iso1.exon1.amp1_2147	-0.154731735	-0.367090853	0.938847691	-0.212359118	0.032681584	0.635660862	FALSE
417	PF3D7_0413300.iso1.exon2.amp1_707	-0.219256352	-0.415102056	0.69218858	-0.195845705	0.091113889	0.635660862	FALSE
418	PF3D7_0414000.e2s1_8062	0.172708928	0.057014045	0.445055842	-0.115694883	0.248454101	0.635660862	FALSE
419	PF3D7_0414700.1o1_7337	-0.272176524	-0.445698876	0.518254855	-0.173522352	0.186116389	0.635660862	FALSE
420	PF3D7_0414900.e4s1_5677	-0.500219541	-0.622815894	0.197774373	-0.122596354	0.593333556	0.711898712	FALSE
421	PF3D7_0415000.1o1_7877	-0.263992859	-0.538562262	0.408133449	-0.274569403	0.286229645	0.635660862	FALSE
422	PF3D7_0415100.iso1.exon1.amp1_2166	-0.340944786	-0.411821308	0.200255819	-0.070876521	0.58880641	0.709807899	FALSE
423	PF3D7_0415300.iso1.exon1.amp1_4554	-0.130257315	-0.193459624	0.219552245	-0.063202309	0.554281726	0.687701752	FALSE
424	PF3D7_0415300.iso1.exon1.amp2_3693	-0.10618117	-0.163216917	0.207318509	-0.057035747	0.576029117	0.702244096	FALSE
425	PF3D7_0415400.1o1_6387	-0.457614949	-0.634709807	0.36260237	-0.177094858	0.339212148	0.635660862	FALSE
426	PF3D7_0416300.iso1.exon1.amp2_462	-0.635618055	-0.760079642	0.733428353	-0.124461587	0.076711285	0.635660862	FALSE
427	PF3D7_0416400.iso1.exon2.amp1_1080	0.064813031	-0.094290847	0.440898189	-0.159103878	0.252484794	0.635660862	FALSE
428	PF3D7_0416400.iso1.exon2.amp2_3664	-0.668982666	-0.722207288	0.180100068	-0.053224622	0.626133591	0.732448306	FALSE
429	PF3D7_0416600.1o1_5263	-0.535725	-0.563747382	0.091777202	-0.028022381	0.802652786	0.851238757	FALSE
430	PF3D7_0416900.iso1.exon2.amp2_seg1_2886	-0.436648942	-0.525043095	0.454462355	-0.088394153	0.239537942	0.635660862	FALSE
431	PF3D7_0417100.1o4_5878	0.120035423	0.065993728	0.121424015	-0.054041695	0.741352381	0.811015437	FALSE
432	PF3D7_0417400.iso1.exon1.amp4_seg2_2328	0.630873628	0.457634843	0.302257845	-0.173238785	0.420892308	0.639515524	FALSE
433	PF3D7_0417400.iso1.exon1.amp6_seg1_1730	-0.475731868	-0.584804553	0.445966302	-0.109072685	0.247578828	0.635660862	FALSE
434	PF3D7_0418000.6o10_5641	-0.69617935	-0.815786519	0.352644523	-0.119607169	0.351778424	0.635660862	FALSE
435	PF3D7_0418000.7o10_5069	-0.855799731	-1.052530503	0.343908159	-0.196730772	0.363098183	0.635660862	FALSE
436	PF3D7_0418800.iso1.exon4.amp1_2929	-0.455324139	-0.762400105	0.48819989	-0.307075966	0.209803719	0.635660862	FALSE
437	PF3D7_0419100.iso1.exon1.amp1_2401	-0.516998877	-0.710727703	0.39607248	-0.193728826	0.29956061	0.635660862	FALSE
438	PF3D7_0419200.1o1_6384	-1.056105621	-1.197864611	0.200438706	-0.14175899	0.588473526	0.709711728	FALSE
439	PF3D7_0419300.iso1.exon1.amp1_2162	0.269169994	0.100652723	0.547261818	-0.168517271	0.165574909	0.635660862	FALSE
440	PF3D7_0419400.2o4_8826	-0.178853671	-0.376964336	0.253152956	-0.198110664	0.497160925	0.661877712	FALSE
441	PF3D7_0419400.3o4_9115	-0.722018798	-0.903747023	0.503677872	-0.181728225	0.197287986	0.635660862	FALSE
442	PF3D7_0419400.4o4_8537	-0.795138848	-1.02012376	0.47036223	-0.224984912	0.225095128	0.635660862	FALSE
443	PF3D7_0419500.1o1_5301	-0.636692094	-0.646288858	0.039788079	-0.009596764	0.913556377	0.933192015	FALSE
444	PF3D7_0419700.1o1_8146	-0.319853883	-0.318794883	0.005293004	0.001059	0.988473173	0.990810599	FALSE
445	PF3D7_0419900.iso1.exon3.amp1_2826	-0.671843691	-0.749354441	0.337572229	-0.07751075	0.371481056	0.635660862	FALSE
446	PF3D7_0419900.iso1.exon3.amp5_seg1_2006	-0.51509671	-0.594132091	0.489771199	-0.079035381	0.208501713	0.635660862	FALSE
447	PF3D7_0420000.s2_5994	-0.70094278	-0.806528223	0.746077753	-0.105585443	0.07276408	0.635660862	FALSE
448	PF3D7_0420300.iso1.exon1.amp1_521	-0.453398885	-0.564999392	0.325320102	-0.111600507	0.388106774	0.635660862	FALSE
449	PF3D7_0420300.iso1.exon1.amp3_1099	-0.476170005	-0.536867042	0.206467128	-0.060697036	0.577560844	0.702244096	FALSE
450	PF3D7_0420300.iso1.exon1.amp4_seg1_3445	-0.233477781	-0.302817674	0.100631009	-0.069339894	0.784165791	0.841485219	FALSE
451	PF3D7_0420600.iso1.exon1.amp1_2477	-0.89743391	-0.937927168	0.251201228	-0.040493258	0.500371388	0.662415459	FALSE
452	PF3D7_0420700.e2s1_8336	1.370572762	1.235548739	0.433215079	-0.135024023	0.260080055	0.635660862	FALSE
453	PF3D7_0420900.iso1.exon1.amp1_4190	0.286730511	0.060689042	0.378051278	-0.226041468	0.320418872	0.635660862	FALSE
454	PF3D7_0421200.iso1.exon2.amp1_3312	0.213308902	0.009248085	0.432275828	-0.204060817	0.261021734	0.635660862	FALSE
455	PF3D7_0421300.iso1.exon1.amp1_2739	0.563319703	0.418269097	0.195486781	-0.145050606	0.5975243	0.714481081	FALSE
456	PF3D7_0421800.iso1.exon1.amp1_1236	0.065310032	-0.044969111	0.802873939	-0.110279144	0.057403769	0.635660862	FALSE
457	PF3D7_0422000.5o5_7285	-0.22719191	-0.577586905	0.461416773	-0.350394995	0.233124773	0.635660862	FALSE
458	PF3D7_0422100 (renamed)_7011	2.197860342	2.095279081	0.350585174	-0.102581261	0.354421835	0.635660862	FALSE
459	PF3D7_0422200.iso1.exon1.amp4_2550	-0.344714096	-0.430876348	0.191388882	-0.086162252	0.60507248	0.717943195	FALSE
460	PF3D7_0422300.e3s1_6907	-0.130933334	-0.40730324	0.479107595	-0.276369906	0.217479834	0.635660862	FALSE
461	PF3D7_0422400.e2s1_5434	-0.221599322	-0.394479146	0.343914881	-0.172879824	0.363089366	0.635660862	FALSE
462	PF3D7_0422500.e1s2_8254	-0.414710565	-0.581109055	0.339556239	-0.16639849	0.368840362	0.635660862	FALSE
463	PF3D7_0422500.e1s3_5652	-0.010860894	-0.170717924	0.367194854	-0.15985703	0.333536642	0.635660862	FALSE
464	PF3D7_0422700.e1s1_4878	-0.180624727	-0.410686782	0.373700112	-0.230062055	0.325626106	0.635660862	FALSE
465	PF3D7_0423100.iso1.exon1.amp1_3832	-0.656194031	-0.904570662	0.48659461	-0.248376631	0.211141305	0.635660862	FALSE
466	PF3D7_0423400.1o1_7833	-0.098354136	-0.321780312	0.328967038	-0.223426175	0.383100667	0.635660862	FALSE
467	PF3D7_0423700.1o1_6673	1.455054571	0.903072283	0.499547952	-0.551982289	0.200560637	0.635660862	FALSE
468	PF3D7_0424200.iso1.exon1.amp2_2772	-0.243526421	-0.270119952	0.082573162	-0.026593532	0.822015639	0.865214659	FALSE
469	PF3D7_0424600.e2s1_8623	-0.587364134	-0.648713584	0.159585365	-0.06134945	0.665370863	0.759197677	FALSE
470	PF3D7_0424800.2o2_6416	0.309861817	0.271975935	0.075161783	-0.037885882	0.837705222	0.876592357	FALSE
471	PF3D7_0425100.2o2_8127	0.905933544	0.783497629	0.593458428	-0.122435915	0.137134656	0.635660862	FALSE
472	PF3D7_0425200.2o2_5531	-0.547894238	-0.624704609	0.168379346	-0.076810372	0.648403265	0.74635581	FALSE
473	PF3D7_0425300.1o1_8130	-0.330700373	-0.438003712	0.223503748	-0.10730334	0.547363556	0.68274351	FALSE
474	PF3D7_0425500.iso1.exon1.amp1_1565	0.657266618	0.40326202	1.141463419	-0.254004598	0.014480881	0.635660862	FALSE
475	PF3D7_0425700.iso1.exon1.amp1_4168	0.524254377	0.324763912	0.34892541	-0.199490465	0.356563499	0.635660862	FALSE
476	PF3D7_0425800.iso1.exon1.amp1_3955	-0.505538225	-0.601804403	0.595131086	-0.096266178	0.13619621	0.635660862	FALSE
477	PF3D7_0425800.iso1.exon1.amp2_4244	-0.792244673	-0.987000963	0.684414871	-0.19475629	0.09411281	0.635660862	FALSE
478	PF3D7_0425800.iso1.exon2.amp1_4183	1.20903592	1.169911285	0.038230962	-0.039124634	0.916924038	0.935618181	FALSE
479	PF3D7_0425900.iso1.exon2.amp1_4457	-0.13282674	-0.273395022	0.452146589	-0.140568282	0.241707039	0.635660862	FALSE
480	PF3D7_0426000.iso1.exon1.amp1_4198	-0.170012897	-0.398049911	0.579726371	-0.228037014	0.145072283	0.635660862	FALSE
481	PF3D7_0500100.iso1.exon1.amp1_2232	-0.472874516	-0.718504805	0.554011595	-0.245630289	0.16110314	0.635660862	FALSE
482	PF3D7_0500100.iso1.exon2.amp1_1299	0.660596488	0.662512391	0.003168921	0.001915902	0.993098702	0.993807552	FALSE
483	PF3D7_0500400.iso1.exon1.amp1_3882	0.860729501	0.636745843	0.616342843	-0.223983658	0.124810326	0.635660862	FALSE
484	PF3D7_0500500.iso1.exon1.amp1_2721	0.901911964	0.85845854	0.181420123	-0.043453424	0.623650856	0.732446382	FALSE
485	PF3D7_0500800.e1s1_7120	-0.479705747	-0.637058851	0.39305997	-0.157353104	0.302968518	0.635660862	FALSE
486	PF3D7_0500800.e2s1_8081	-0.395636441	-0.663558985	0.392096377	-0.267922544	0.304065228	0.635660862	FALSE
487	PF3D7_0500900.iso1.exon2.amp1_442	-0.057558656	-0.093920013	0.191135708	-0.036361357	0.605540533	0.717943195	FALSE
488	PF3D7_0501000.e1s1_4842	-0.533347451	-0.703313107	0.580521369	-0.169965656	0.144601231	0.635660862	FALSE
489	PF3D7_0501000.e2s1_5152	-0.002620249	-0.319423779	0.412983665	-0.316803531	0.281008636	0.635660862	FALSE
490	PF3D7_0501100.1.e3s1_7453	0.858075575	0.744640159	0.247731648	-0.113435417	0.506111804	0.664751529	FALSE
491	PF3D7_0501100.1.e4s1_6302	-0.417155445	-0.607664356	0.613435728	-0.190508911	0.126315529	0.635660862	FALSE
492	PF3D7_0501100.iso2.exon3.amp1_2407	0.226604119	0.075381716	0.339293154	-0.151222403	0.369189701	0.635660862	FALSE
493	PF3D7_0501200.e2_7703	-0.679724044	-0.823072287	0.340314612	-0.143348243	0.367834762	0.635660862	FALSE
494	PF3D7_0501500.e1s1_8931	-0.680297655	-0.783318666	0.563714271	-0.103021011	0.1548703	0.635660862	FALSE
495	PF3D7_0501600.e1s1_8642	-0.051935737	-0.421472057	0.490591548	-0.369536319	0.207824813	0.635660862	FALSE
496	PF3D7_0501800.e1s1_4880	0.533787243	0.56189274	0.121302958	0.028105497	0.741598995	0.811015437	FALSE
497	PF3D7_0501800.e1s2_6042	0.847461152	0.619661565	0.765515633	-0.227799587	0.067090321	0.635660862	FALSE
498	PF3D7_0501900.iso1.exon2.amp1_2980	-0.445142356	-0.66975922	0.268487126	-0.224616864	0.472408839	0.650316423	FALSE
499	PF3D7_0502000.iso1.exon2.amp1_1211	-0.068123216	-0.36335516	0.493751059	-0.295231944	0.205235972	0.635660862	FALSE
500	PF3D7_0502200.2o2_5863	-0.392659751	-0.421375306	0.102361992	-0.028715555	0.780568417	0.839230767	FALSE
501	PF3D7_0502400.1o1_5886	0.481168152	0.207341836	0.299304487	-0.273826316	0.425231615	0.640679519	FALSE
502	PF3D7_0502700.iso1.exon2.amp1_3857	0.101607671	-0.011357094	0.307644661	-0.112964766	0.413059864	0.638828732	FALSE
503	PF3D7_0502800.1o1_6679	-0.952668251	-1.236821521	0.393922727	-0.284153269	0.301989308	0.635660862	FALSE
504	PF3D7_0503000.5o5_8733	-1.023391025	-1.178928031	0.285754187	-0.155537006	0.445549661	0.644181533	FALSE
505	PF3D7_0503600.e1s1_5436	-0.395980258	-0.534540342	0.444330483	-0.138560084	0.249153321	0.635660862	FALSE
506	PF3D7_0503600.e7s1_7736	-0.409578094	-0.661516835	0.354265942	-0.251938742	0.34970793	0.635660862	FALSE
507	PF3D7_0503900.2o2_5032	-0.961144664	-0.967931132	0.049142204	-0.006786468	0.893368333	0.918593621	FALSE
508	PF3D7_0504200.2o3_7328	-0.568830632	-0.703146567	0.305830245	-0.134315935	0.415686152	0.638828732	FALSE
509	PF3D7_0504400.iso1.exon1.amp1_2757	-0.647795758	-0.711177039	0.155996786	-0.063381282	0.672356502	0.762656809	FALSE
510	PF3D7_0504500.5o6_9016	-0.096169158	-0.212604846	0.406766669	-0.116435688	0.287715335	0.635660862	FALSE
511	PF3D7_0504600_5397	-0.112568607	-0.445355805	0.633048928	-0.332787199	0.11648692	0.635660862	FALSE
512	PF3D7_0504800.iso1.exon1.amp1_1378	-0.076465732	-0.036440275	0.126389461	0.040025457	0.731265321	0.804420541	FALSE
513	PF3D7_0504800.iso1.exon1.amp2_1667	-0.786721335	-1.108226258	0.783725766	-0.321504924	0.06217831	0.635660862	FALSE
514	PF3D7_0505100.iso1.exon1.amp1_1083	-0.239138586	-0.439943525	0.471961412	-0.200804939	0.223685383	0.635660862	FALSE
515	PF3D7_0505100.iso1.exon1.amp2_3685	-0.240482334	-0.316690653	0.227516597	-0.076208318	0.54039186	0.679698779	FALSE
516	PF3D7_0505100.iso1.exon2.amp1_507	-0.622216524	-0.725355542	0.363390537	-0.103139018	0.338232744	0.635660862	FALSE
517	PF3D7_0505100.iso1.exon2.amp2_1332	-0.377659165	-0.534657296	0.436534979	-0.156998131	0.256774624	0.635660862	FALSE
518	PF3D7_0505200.e1s1_6332	-0.371229204	-0.554139047	0.709167416	-0.182909843	0.08488649	0.635660862	FALSE
519	PF3D7_0505400.1o1_4753	-0.601743386	-0.705086184	0.617673639	-0.103342798	0.124127	0.635660862	FALSE
520	PF3D7_0505500.e1s1_4811	-0.322440505	-0.356544847	0.14561064	-0.034104342	0.6927689	0.776105656	FALSE
521	PF3D7_0505500.e2_6247	0.038389654	-0.28955329	0.39526428	-0.327942944	0.300471803	0.635660862	FALSE
522	PF3D7_0506200.1o1_7857	-0.173486921	-0.354614732	0.383800893	-0.181127811	0.313640584	0.635660862	FALSE
523	PF3D7_0506300.iso1.exon1.amp1_3900	1.223639979	1.125466483	0.222473763	-0.098173496	0.549161765	0.683381346	FALSE
524	PF3D7_0506800.e1_6284	-0.595963469	-0.677807767	0.292853457	-0.081844298	0.434820986	0.642042151	FALSE
525	PF3D7_0506900.1o1_6208	-0.658198601	-0.870971629	0.64408562	-0.212773028	0.111282954	0.635660862	FALSE
526	PF3D7_0507200.iso1.exon1.amp1_150	-0.615287193	-0.632814794	0.072935362	-0.017527602	0.842434343	0.880099068	FALSE
527	PF3D7_0507300 (plasmodb revised)_5405	-0.167502953	-0.284463924	0.230937165	-0.116960971	0.534492352	0.677439621	FALSE
528	PF3D7_0507700.e1s1_5454	-0.531427531	-0.610921584	0.277947811	-0.079494054	0.457558796	0.644181533	FALSE
529	PF3D7_0507900.iso1.exon2.amp1_43	-0.40955658	-0.645412407	0.378696217	-0.235855827	0.319652744	0.635660862	FALSE
530	PF3D7_0508000.1o1_6429	-0.30293437	-0.478667219	0.293031898	-0.17573285	0.434553691	0.642042151	FALSE
531	PF3D7_0508400.4o4_6424	-0.737400354	-0.81889028	0.302169267	-0.081489927	0.421021989	0.639515524	FALSE
532	PF3D7_0508500.s3_4828	-0.974668617	-1.081147138	0.368709255	-0.10647852	0.331681635	0.635660862	FALSE
533	PF3D7_0508600.iso1.exon1.amp1_3875	-0.039387795	-0.162949473	0.477431597	-0.123561678	0.218921491	0.635660862	FALSE
534	PF3D7_0508900.iso1.exon1.amp1_1678	-0.903149877	-1.123672523	0.54112478	-0.220522647	0.169739569	0.635660862	FALSE
535	PF3D7_0508900.iso1.exon1.amp2_1967	-0.268100236	-0.54156485	0.418636296	-0.273464614	0.275024026	0.635660862	FALSE
536	PF3D7_0508900.iso1.exon1.amp4_4215	-0.669417378	-0.731766219	0.288310598	-0.062348841	0.441665139	0.644181533	FALSE
537	PF3D7_0509000.e5s1_6290	0.018868568	-0.234846864	0.564466497	-0.253715432	0.154396542	0.635660862	FALSE
538	PF3D7_0509100.iso1.exon1.amp1_2855	0.245748027	0.278693136	0.097083255	0.032945109	0.791556448	0.844983779	FALSE
539	PF3D7_0509100.iso1.exon1.amp2_3351	-0.251102291	-0.382630689	0.646621213	-0.131528398	0.110119398	0.635660862	FALSE
540	PF3D7_0509200.iso1.exon4.amp1_392	-0.553163406	-0.706667253	0.232580511	-0.153503848	0.531672264	0.677439621	FALSE
541	PF3D7_0509500.1o1_6441	-0.459797442	-0.645581243	0.393571795	-0.185783801	0.302387297	0.635660862	FALSE
542	PF3D7_0509600.2o2_7637	-0.683782793	-0.84027932	0.277494398	-0.156496527	0.458263114	0.644181533	FALSE
543	PF3D7_0509700.e4s1_9186	-0.61114082	-0.769157054	0.402780243	-0.158016233	0.292084979	0.635660862	FALSE
544	PF3D7_0509800.2o4_8246	-0.527545882	-0.774162255	0.416699623	-0.246616373	0.277062352	0.635660862	FALSE
545	PF3D7_0509900.iso1.exon1.amp1_3597	0.237435333	0.081610488	0.37226084	-0.155824845	0.327363321	0.635660862	FALSE
546	PF3D7_0510100.iso1.exon1.amp2_4582	-0.568387775	-0.684421861	0.706358297	-0.116034086	0.08588706	0.635660862	FALSE
547	PF3D7_0510100.iso1.exon1.amp3_1915	-0.167342465	-0.459070134	0.48157688	-0.291727669	0.21537103	0.635660862	FALSE
548	PF3D7_0510400.1o1_8464	0.355386487	0.341502663	0.053090642	-0.013883825	0.884871263	0.912356001	FALSE
549	PF3D7_0510800.1o1_4938	0.694875825	0.354669308	0.725601403	-0.340206517	0.079259611	0.635660862	FALSE
550	PF3D7_0511100.iso1.exon2.amp1_1537	-0.435122779	-0.582444634	0.386144158	-0.147321856	0.310911409	0.635660862	FALSE
551	PF3D7_0511300.iso1.exon1.amp1_2538	-0.504431164	-0.530092552	0.044319451	-0.025661387	0.903767229	0.925552707	FALSE
552	PF3D7_0511400.1o1_4698	-0.235630515	-0.388202719	0.430438525	-0.152572203	0.262872131	0.635660862	FALSE
553	PF3D7_0511400_8865	0.081978095	-0.245383035	1.200760557	-0.32736113	0.011500856	0.635660862	FALSE
554	PF3D7_0511500.s1_7710	-0.584118613	-0.647973396	0.427783899	-0.063854783	0.265565245	0.635660862	FALSE
555	PF3D7_0511500.s3_7138	-0.256598123	-0.484524146	0.459091484	-0.227926023	0.235252341	0.635660862	FALSE
556	PF3D7_0511500.s4_7427	-0.604046597	-0.588140578	0.056019123	0.015906019	0.878579561	0.907380143	FALSE
557	PF3D7_0511600.1o1_5809	0.023360458	-0.196576515	0.311227597	-0.219936973	0.407909162	0.638828732	FALSE
558	PF3D7_0512100.iso1.exon2.amp1_3546	-0.886770064	-0.985653881	0.307599334	-0.098883817	0.413125326	0.638828732	FALSE
559	PF3D7_0512600.e6s1_7173	-0.563372597	-0.703500135	0.546130491	-0.140127538	0.16633551	0.635660862	FALSE
560	PF3D7_0512900.iso1.exon1.amp1_3002	-0.804407069	-0.960725616	0.415413917	-0.156318547	0.278422493	0.635660862	FALSE
561	PF3D7_0513000.e1s1_5733	-0.35049892	-0.656276293	0.4070326	-0.305777373	0.28742577	0.635660862	FALSE
562	PF3D7_0513100.2o3_7569	-0.507482112	-0.594746105	0.279883699	-0.087263992	0.454560032	0.644181533	FALSE
563	PF3D7_0513200.e2s3_5488	-0.478985309	-0.659481541	0.353522973	-0.180496232	0.350655496	0.635660862	FALSE
564	PF3D7_0513300.e1s1_8334	-0.455143204	-0.570332209	0.342574427	-0.115189005	0.364850668	0.635660862	FALSE
565	PF3D7_0513400.iso1.exon2.amp1_92	-0.189113146	-0.475639231	0.393785146	-0.286526085	0.302145287	0.635660862	FALSE
566	PF3D7_0513700.e3s1_8904	-0.737091871	-0.937618121	0.458437376	-0.20052625	0.235853853	0.635660862	FALSE
567	PF3D7_0514000.iso1.exon2.amp1_129	-0.216174675	-0.270228122	0.327096341	-0.054053447	0.385662473	0.635660862	FALSE
568	PF3D7_0514100.iso1.exon1.amp2_3648	-0.788798896	-0.865913524	0.277898836	-0.077114628	0.457634835	0.644181533	FALSE
569	PF3D7_0514600.iso1.exon2.amp1_2392	-0.389198064	-0.648874025	0.423680259	-0.259675962	0.269774118	0.635660862	FALSE
570	PF3D7_0514900.1o1_8458	-0.790017088	-0.956410048	0.427692566	-0.16639296	0.265658315	0.635660862	FALSE
571	PF3D7_0516000.iso1.exon1.amp1_2533	-0.709278175	-0.723722894	0.096463297	-0.014444719	0.792850329	0.844983779	FALSE
572	PF3D7_0516400.1o1_9029	0.360840406	0.088058767	0.553330451	-0.272781639	0.161549296	0.635660862	FALSE
573	PF3D7_0516500.5o6_7013	-0.469208556	-0.629767311	0.419809725	-0.160558755	0.273795114	0.635660862	FALSE
574	PF3D7_0516600.s1_6862	-0.583920675	-0.689260576	0.443629811	-0.105339901	0.249830342	0.635660862	FALSE
575	PF3D7_0516600.s2_5122	-0.563158079	-0.613438633	0.231153789	-0.050280554	0.534120083	0.677439621	FALSE
576	PF3D7_0516800.iso1.exon1.amp2_530	-0.420781644	-0.440588829	0.095410913	-0.019807185	0.795048303	0.846040016	FALSE
577	PF3D7_0516800.iso1.exon1.amp3_1048	-0.487462829	-0.528212192	0.171285036	-0.040749364	0.642845058	0.741784997	FALSE
578	PF3D7_0517600.1o1_7287	0.186209377	-0.010493951	0.445051488	-0.196703328	0.248458293	0.635660862	FALSE
579	PF3D7_0517700_5368	-0.236612082	-0.363275303	0.24416878	-0.126663221	0.512050593	0.668845721	FALSE
580	PF3D7_0517900.2o2_7334	-0.381347349	-0.480964511	0.285868019	-0.099617162	0.445376184	0.644181533	FALSE
581	PF3D7_0518400.iso1.exon1.amp1_4147	-0.687501929	-0.87727038	0.876637911	-0.189768451	0.042240638	0.635660862	FALSE
582	PF3D7_0518600.iso1.exon1.amp1_1407	-0.092981024	-0.277626478	0.611839115	-0.184645454	0.127149532	0.635660862	FALSE
583	PF3D7_0518600.iso1.exon1.amp2_1924	-0.260336977	-0.416910421	0.650827959	-0.156573444	0.10821482	0.635660862	FALSE
584	PF3D7_0518700.e1s1_5478	-0.825518832	-0.832958327	0.047396054	-0.007439495	0.89713093	0.921786415	FALSE
585	PF3D7_0518700.e3s1_8039	-0.532792721	-0.723440473	0.607330186	-0.190647752	0.129533151	0.635660862	FALSE
586	PF3D7_0518800.iso1.exon7.amp1_2109	-0.04772796	-0.231267938	0.337974995	-0.183539978	0.37094382	0.635660862	FALSE
587	PF3D7_0518900.iso1.exon1.amp1_2982	-0.481662686	-0.683189766	0.506631799	-0.201527079	0.19497663	0.635660862	FALSE
588	PF3D7_0519000.iso1.exon1.amp1_4167	-0.800501366	-0.839361579	0.171815314	-0.038860213	0.641833331	0.741023487	FALSE
589	PF3D7_0519100.iso1.exon1.amp1_673	-0.437501945	-0.523172247	0.409039363	-0.085670302	0.285248417	0.635660862	FALSE
590	PF3D7_0519200.e2s1_5387	-0.504054236	-0.848323158	0.404935942	-0.344268921	0.28971531	0.635660862	FALSE
591	PF3D7_0519300.1o1_9072	-0.568538875	-0.708499228	0.531763555	-0.139960353	0.176277319	0.635660862	FALSE
592	PF3D7_0519900.1o1_7902	-0.979657164	-1.189124383	0.432256907	-0.209467219	0.261040734	0.635660862	FALSE
593	PF3D7_0520000.e3s1_9191	-0.743109311	-0.916058505	0.473729665	-0.172949194	0.222135597	0.635660862	FALSE
594	PF3D7_0520100.e1s1_8338	0.091198492	-0.001052397	0.210182328	-0.092250889	0.570894105	0.698119089	FALSE
595	PF3D7_0520400.e1s1_6896	0.292051614	0.145469897	0.298953532	-0.146581717	0.42574939	0.640679519	FALSE
596	PF3D7_0521200.iso1.exon1.amp1_717	-0.49743685	-0.648881743	0.298824818	-0.151444894	0.425939398	0.640679519	FALSE
597	PF3D7_0521300.iso1.exon3.amp1_2837	-0.822916558	-0.753025007	0.202155237	0.069891551	0.585354369	0.707776477	FALSE
598	PF3D7_0521300.iso1.exon3.amp2_seg2_577	-0.491177224	-0.645194976	0.521468813	-0.154017752	0.183731383	0.635660862	FALSE
599	PF3D7_0521400.1o1_8497	0.361298714	0.252921173	0.414891411	-0.108377541	0.278976837	0.635660862	FALSE
600	PF3D7_0521600.iso1.exon1.amp1_1810	-0.893674728	-0.93785106	0.17961567	-0.044176332	0.627045945	0.732904055	FALSE
601	PF3D7_0521700.e1s1_9110	-1.100384398	-0.913015175	0.171013098	0.187369223	0.643364208	0.74196161	FALSE
602	PF3D7_0521800.iso1.exon1.amp1_1519	-0.691727561	-0.976851646	0.569362365	-0.285124084	0.151345846	0.635660862	FALSE
603	PF3D7_0522400.e3s3_9155	-0.882137476	-1.027957815	0.459744326	-0.145820339	0.234653318	0.635660862	FALSE
604	PF3D7_0522400.e4s2_8874	-0.568193103	-0.599159223	0.162208393	-0.03096612	0.660287191	0.756618424	FALSE
605	PF3D7_0522400.e4s3_7140	0.054706089	-0.099131445	0.68859471	-0.153837534	0.092488498	0.635660862	FALSE
606	PF3D7_0522500.iso1.exon1.amp1_2655	-0.227149333	-0.434825299	0.482583042	-0.207675966	0.214516934	0.635660862	FALSE
607	PF3D7_0523100.e2s1_7775	-0.471786488	-0.616885708	0.359938156	-0.14509922	0.342539289	0.635660862	FALSE
608	PF3D7_0523400.3o3_6752	-0.122920084	-0.189119121	0.264088575	-0.066199037	0.479422896	0.654479941	FALSE
609	PF3D7_0523800.1o1_7352	-0.800670254	-0.964568345	0.3367076	-0.163898091	0.372636356	0.635660862	FALSE
610	PF3D7_0524100.iso1.exon1.amp1_509	-3.24E-06	-0.2153469	0.388169737	-0.215343664	0.30856773	0.635660862	FALSE
611	PF3D7_0524100.iso1.exon1.amp2_798	-0.574869721	-0.663186519	0.810545191	-0.088316798	0.0555967	0.635660862	FALSE
612	PF3D7_0524200.iso1.exon1.amp1_3223	-0.142490101	-0.344721887	0.285030172	-0.202231785	0.446654144	0.644181533	FALSE
613	PF3D7_0524300.1o1_8762	-0.82983432	-0.881327789	0.222096084	-0.051493469	0.549822036	0.683381346	FALSE
614	PF3D7_0524400.e1s1_7190	-0.42799628	-0.561731562	0.298239465	-0.133735282	0.426804264	0.640696288	FALSE
615	PF3D7_0524500.1o1_5233	-0.537908103	-0.540196604	0.005778715	-0.002288501	0.987415521	0.990595035	FALSE
616	PF3D7_0524700.1o1_6961	-0.492722932	-0.60894469	0.201707489	-0.116221758	0.586167076	0.70814842	FALSE
617	PF3D7_0524700_8580	-0.762485449	-1.019530022	0.33021662	-0.257044573	0.381396569	0.635660862	FALSE
618	PF3D7_0524800.iso1.exon1.amp1_2188	0.551996257	0.37346031	0.398590602	-0.178535947	0.296736062	0.635660862	FALSE
619	PF3D7_0525000.1o1_7931	-0.573207351	-0.723041897	0.470741383	-0.149834547	0.224760188	0.635660862	FALSE
620	PF3D7_0525100.e1s1_4897	-0.579126858	-0.696379637	0.401447591	-0.117252779	0.293557868	0.635660862	FALSE
621	PF3D7_0525200.iso1.exon1.amp2_3987	-0.573608377	-0.693543376	0.865795848	-0.119934998	0.044182328	0.635660862	FALSE
622	PF3D7_0525300.1o1_6447	-0.240941481	-0.334014749	0.206735262	-0.093073268	0.577078188	0.702244096	FALSE
623	PF3D7_0525800.e1s1_6607	0.070008623	-0.069264102	0.306918027	-0.139272725	0.414110186	0.638828732	FALSE
624	PF3D7_0526200.iso2.exon7.amp1_2452	0.301476716	0.068213968	0.599310497	-0.233262748	0.133877769	0.635660862	FALSE
625	PF3D7_0526600.iso1.exon1.amp4_3706	1.635232082	1.563293966	0.201819482	-0.071938116	0.585963737	0.70814842	FALSE
626	PF3D7_0526900.iso1.exon3.amp1_1800	-0.596032155	-0.879498218	0.467960935	-0.283466063	0.22722655	0.635660862	FALSE
627	PF3D7_0527200.e2s1_8350	0.669061311	0.516161094	0.225011441	-0.152900217	0.544737785	0.681639961	FALSE
628	PF3D7_0527600.6o10_4989	-0.710899342	-0.750529685	0.173135923	-0.039630343	0.639317264	0.740076938	FALSE
629	PF3D7_0528200.e2s1_7765	-0.504912308	-0.838615855	0.373846895	-0.333703548	0.325449352	0.635660862	FALSE
630	PF3D7_0528300.1o1_5292	-0.149339964	-0.306446664	0.43242415	-0.1571067	0.260872837	0.635660862	FALSE
631	PF3D7_0528400.4o8_8756	-0.148617739	-0.402087551	0.486292506	-0.253469811	0.211393873	0.635660862	FALSE
632	PF3D7_0528500.iso1.exon5.amp1_2948	-0.508024882	-0.806530992	0.395980804	-0.29850611	0.299663855	0.635660862	FALSE
633	PF3D7_0529000.1o1_7059	-0.126086767	-0.188126982	0.198438886	-0.062040215	0.592119303	0.710745944	FALSE
634	PF3D7_0529400.1.e2s1_8277	-0.592240225	-0.769804467	0.402431198	-0.177564242	0.292470165	0.635660862	FALSE
635	PF3D7_0529400.1.e5s1_7458	0.040714642	-0.198051624	0.490443946	-0.238766266	0.207946461	0.635660862	FALSE
636	PF3D7_0529400.1.e7s1_6001	-0.390700937	-0.525496938	0.5750507	-0.134796001	0.147871885	0.635660862	FALSE
637	PF3D7_0529700.iso1.exon2.amp1_3636	-0.632886167	-0.691414484	0.404600259	-0.058528317	0.290083267	0.635660862	FALSE
638	PF3D7_0530100.2o2_9005	1.228923878	1.084217875	0.224760443	-0.144706004	0.545174385	0.681639961	FALSE
639	PF3D7_0530900.iso1.exon1.amp1_818	-0.250340678	-0.287756431	0.070698156	-0.037415752	0.847193408	0.883425183	FALSE
640	PF3D7_0530900.iso1.exon1.amp2_1107	-0.153491539	-0.207548584	0.195487716	-0.054057045	0.597522585	0.714481081	FALSE
641	PF3D7_0530900.iso1.exon1.amp3_3077	-0.295740438	-0.357846673	0.326271092	-0.062106235	0.386796672	0.635660862	FALSE
642	PF3D7_0531100.iso1.exon1.amp2_seg2_3774	-0.707675026	-0.762963965	0.251723803	-0.055288939	0.499510467	0.662415459	FALSE
643	PF3D7_0531400.iso1.exon1.amp2_1631	-0.073099067	-0.197800956	0.310362284	-0.124701889	0.409148794	0.638828732	FALSE
644	PF3D7_0532100_6557	1.658522004	1.53696523	0.174479364	-0.121556773	0.63676291	0.7398397	FALSE
645	PF3D7_0532300.e2s1_9209	-0.489784613	-0.742747526	0.606326097	-0.252962912	0.130069701	0.635660862	FALSE
646	PF3D7_0532400.e1s1_5131	-1.296460096	-1.529380677	0.404082031	-0.232920581	0.290652077	0.635660862	FALSE
647	PF3D7_0532400.e2s1_5163	-0.486115899	-0.593278001	0.340743251	-0.107162102	0.367267315	0.635660862	FALSE
648	PF3D7_0533100.iso1.exon1.amp1_3129	-0.524521493	-0.592036602	0.342547856	-0.067515109	0.364885647	0.635660862	FALSE
649	PF3D7_0533100.iso1.exon1.amp2_3418	-0.591688214	-0.787490087	0.80988437	-0.195801873	0.055750067	0.635660862	FALSE
650	PF3D7_0533100.iso1.exon1.amp3_1389	-0.441623863	-0.542130397	0.834191677	-0.100506534	0.050382011	0.635660862	FALSE
651	PF3D7_0600200.iso1.exon1.amp3_1938	-0.387386077	-0.482930772	0.546742417	-0.095544695	0.165923708	0.635660862	FALSE
652	PF3D7_0600300.iso1.exon1.amp1_1286	0.564041086	0.220703619	0.610389702	-0.343337467	0.127911175	0.635660862	FALSE
653	PF3D7_0600400.iso1.exon1.amp1_3033	1.220027352	1.287159474	0.125837609	0.067132122	0.732383615	0.805084884	FALSE
654	PF3D7_0600400.iso1.exon2.amp1_1895	-0.493789348	-0.711855166	0.54696296	-0.218065818	0.165775522	0.635660862	FALSE
655	PF3D7_0600500.iso1.exon2.amp1_130	0.651559015	0.356175682	0.434443506	-0.295383333	0.258852799	0.635660862	FALSE
656	PF3D7_0600700.iso1.exon1.amp1_4469	0.166115367	-0.140616851	0.56450607	-0.306732219	0.154371656	0.635660862	FALSE
657	PF3D7_0601000.iso1.exon1.amp1_3293	-0.341100409	-0.551783193	0.672058057	-0.210682784	0.099079581	0.635660862	FALSE
658	PF3D7_0601200.iso1.exon2.amp1_695	0.689180666	0.382690045	1.07265074	-0.306490621	0.019009337	0.635660862	FALSE
659	PF3D7_0601500.iso1.exon1.amp1_4480	-0.616345028	-0.78732739	0.59628744	-0.170982362	0.135550982	0.635660862	FALSE
660	PF3D7_0601700.2o2_6415	-0.893432672	-0.845421881	0.222561985	0.048010791	0.549007603	0.683381346	FALSE
661	PF3D7_0602000.iso1.exon1.amp2_4515	-0.577924254	-0.694407491	0.231720285	-0.116483237	0.533147314	0.677439621	FALSE
662	PF3D7_0602100.iso1.exon1.amp1_1671	0.072070453	-0.081708847	0.500519459	-0.1537793	0.199786457	0.635660862	FALSE
663	PF3D7_0602100.iso1.exon1.amp2_1960	-0.253517315	-0.444264886	0.518202662	-0.190747572	0.18615535	0.635660862	FALSE
664	PF3D7_0602200.1o3_6695	-0.150140918	-0.301959694	0.491856804	-0.151818776	0.206784626	0.635660862	FALSE
665	PF3D7_0602600.iso1.exon3.amp1_4131	0.501712699	0.263782311	0.381958897	-0.237930388	0.315799465	0.635660862	FALSE
666	PF3D7_0602600.iso1.exon4.amp1_377	-0.267994309	-0.459400272	0.583007024	-0.191405963	0.143137662	0.635660862	FALSE
667	PF3D7_0602700.iso1.exon1.amp1_1591	-0.86107396	-1.02371322	0.45546618	-0.16263926	0.238602926	0.635660862	FALSE
668	PF3D7_0603100.1o1_7881	-0.75195234	-0.797226022	0.186062088	-0.045273682	0.614962059	0.724214033	FALSE
669	PF3D7_0603300.iso1.exon1.amp1_2181	-0.43929688	-0.663324914	0.744814228	-0.224028034	0.07314908	0.635660862	FALSE
670	PF3D7_0603800.16o20_7091	0.104566381	0.018552406	0.431719093	-0.086013975	0.261581269	0.635660862	FALSE
671	PF3D7_0604000.iso1.exon1.amp1_1983	-0.629967168	-0.714383018	0.209181674	-0.08441585	0.572685302	0.699699167	FALSE
672	PF3D7_0604000.iso1.exon1.amp3_760	-0.424460671	-0.464429462	0.101705115	-0.03996879	0.781932883	0.840053565	FALSE
673	PF3D7_0604100.iso1.exon1.amp2_3651	0.504492853	0.402488126	0.243409235	-0.102004727	0.513322394	0.668845721	FALSE
674	PF3D7_0604500.iso1.exon1.amp3_3986	0.200950081	-0.001877497	0.270338526	-0.202827579	0.469477345	0.648960613	FALSE
675	PF3D7_0605000.iso1.exon1.amp1_1561	-0.778878329	-0.90170676	0.194581534	-0.122828431	0.599187212	0.714796257	FALSE
676	PF3D7_0605500.iso1.exon2.amp1_4494	-0.542671794	-0.703784795	0.741651302	-0.161113001	0.074121768	0.635660862	FALSE
677	PF3D7_0605600.iso1.exon1.amp1_3384	-0.64940989	-0.923547763	0.980326903	-0.274137873	0.027583328	0.635660862	FALSE
678	PF3D7_0605600.iso1.exon1.amp2_2481	-0.96368882	-1.028348836	0.190522791	-0.064660016	0.606674483	0.718983622	FALSE
679	PF3D7_0605600.iso1.exon4.amp1_4428	-0.209531126	-0.382745512	0.564331775	-0.173214386	0.154481292	0.635660862	FALSE
680	PF3D7_0606000.iso1.exon1.amp2_2795	-0.682414055	-0.642219956	0.102419946	0.040194099	0.780448073	0.839230767	FALSE
681	PF3D7_0606100.iso1.exon4.amp1_4473	-0.578059509	-0.693508732	0.38494366	-0.115449223	0.31230721	0.635660862	FALSE
682	PF3D7_0606500.iso1.exon5.amp1_1589	-0.140301218	-0.33944809	0.30486025	-0.199146872	0.417095128	0.638828732	FALSE
683	PF3D7_0606600.iso1.exon2.amp1_2254	-0.676087252	-0.777745137	0.629177952	-0.101657884	0.118366902	0.635660862	FALSE
684	PF3D7_0606700.iso1.exon1.amp1_3408	-0.462865498	-0.664913309	0.397473414	-0.202047811	0.297986498	0.635660862	FALSE
685	PF3D7_0606800.1o1_4981	0.478151024	0.239093539	0.523972111	-0.239057485	0.181892956	0.635660862	FALSE
686	PF3D7_0607300.2o2_5577	-0.741639357	-0.757312462	0.05300695	-0.015673105	0.885051206	0.912356001	FALSE
687	PF3D7_0607600.1o5_6489	-0.254563686	-0.388586616	0.41397273	-0.13402293	0.279953724	0.635660862	FALSE
688	PF3D7_0607700.iso1.exon1.amp2_seg1_2869	-0.54269532	-0.734837189	0.53587592	-0.192141869	0.173377467	0.635660862	FALSE
689	PF3D7_0608100.iso1.exon1.amp1_4297	-0.855633034	-0.950264371	0.427613934	-0.094631337	0.265738464	0.635660862	FALSE
690	PF3D7_0608100.iso1.exon1.amp2_2496	-0.613682242	-0.603765131	0.050239718	0.009917111	0.891004914	0.916810137	FALSE
691	PF3D7_0608310.iso1.exon3.amp1_440	-0.811365169	-1.022754632	0.465027409	-0.211389463	0.229854262	0.635660862	FALSE
692	PF3D7_0608400.iso1.exon2.amp1_1521	-0.167160903	-0.390739685	0.895062629	-0.223578783	0.039140229	0.635660862	FALSE
693	PF3D7_0608500.2o2_7844	-0.724390662	-0.813017307	0.201423747	-0.088626645	0.586682428	0.708160796	FALSE
694	PF3D7_0609000.iso1.exon1.amp1_3985	-0.588349366	-0.712186863	0.443197003	-0.123837498	0.250249326	0.635660862	FALSE
695	PF3D7_0609000.iso1.exon1.amp2_4274	0.824924111	0.637578409	0.216007842	-0.187345702	0.560531584	0.693165597	FALSE
696	PF3D7_0609300.iso1.exon1.amp1_745	-0.159096802	-0.173532684	0.050890227	-0.014435882	0.889604649	0.91573107	FALSE
697	PF3D7_0609900.iso1.exon1.amp2_2850	-0.332761735	-0.41320092	0.293569049	-0.080439185	0.433749765	0.641615803	FALSE
698	PF3D7_0610000.iso1.exon2.amp1_2117	-0.581540548	-0.715890215	0.483276358	-0.134349667	0.213930143	0.635660862	FALSE
699	PF3D7_0610200.1o1_5636	-0.833086819	-0.925552659	0.206994463	-0.09246584	0.576611833	0.702244096	FALSE
700	PF3D7_0611800.iso1.exon5.amp1_seg1_1151	-0.534041493	-0.612723526	0.545696151	-0.078682033	0.166628372	0.635660862	FALSE
701	PF3D7_0611800.iso1.exon5.amp3_508	-0.58885138	-0.678804871	0.431109982	-0.08995349	0.262194606	0.635660862	FALSE
702	PF3D7_0611900.iso1.exon1.amp1_2690	-0.339259719	-0.615333308	0.753583853	-0.276073589	0.070518314	0.635660862	FALSE
703	PF3D7_0612700.1o1_6423	-0.682594578	-0.861479597	0.351156697	-0.178885018	0.353686683	0.635660862	FALSE
704	PF3D7_0613300.iso1.exon3.amp1_635	-0.471363401	-0.67230278	0.52491159	-0.200939379	0.181207318	0.635660862	FALSE
705	PF3D7_0613300.iso1.exon5.amp1_2341	-0.45950922	-0.639630524	0.300363219	-0.180121304	0.42367237	0.640679519	FALSE
706	PF3D7_0613900.iso1.exon1.amp2_2265	-0.771068081	-1.002052286	0.876969813	-0.230984205	0.042182603	0.635660862	FALSE
707	PF3D7_0614000.iso1.exon1.amp1_157	-0.563297767	-0.717030658	0.405015552	-0.153732891	0.289628101	0.635660862	FALSE
708	PF3D7_0614400.1o1_8430	-0.768478737	-0.758755428	0.030063634	0.009723308	0.934616234	0.949860066	FALSE
709	PF3D7_0614800.iso1.exon1.amp1_433	-1.035999867	-1.021741251	0.104858658	0.014258616	0.775389935	0.837354755	FALSE
710	PF3D7_0615100.1o1_7590	-0.568880059	-0.583344546	0.041500474	-0.014464487	0.909855089	0.930088833	FALSE
711	PF3D7_0615600.5o8_7086	-0.774198342	-0.892385487	0.499256346	-0.118187145	0.200793536	0.635660862	FALSE
712	PF3D7_0615800.2o3_6521	-0.975722878	-1.0641429	0.287831947	-0.088420022	0.442390646	0.644181533	FALSE
713	PF3D7_0616000.1o3_5009	-0.749000487	-0.86208875	0.325395269	-0.113088263	0.388003102	0.635660862	FALSE
714	PF3D7_0616300.iso1.exon1.amp1_967	-0.272433931	-0.388583788	0.309823975	-0.116149857	0.409921352	0.638828732	FALSE
715	PF3D7_0616800.iso1.exon1.amp1_2475	0.225657941	0.181341137	0.113674437	-0.044316804	0.757204124	0.823920471	FALSE
716	PF3D7_0617000.1o1_8750	-0.607064762	-0.704719436	0.458336179	-0.097654674	0.235947032	0.635660862	FALSE
717	PF3D7_0617400.s3 (renamed)_7396	-0.198324355	-0.331624289	0.381863742	-0.133299934	0.315911313	0.635660862	FALSE
718	PF3D7_0617600.iso1.exon1.amp1_3292	1.955343885	1.580108192	0.848239248	-0.375235693	0.047523171	0.635660862	FALSE
719	PF3D7_0617700.iso1.exon1.amp1_3596	0.65529771	0.557826018	0.276967301	-0.097471692	0.459082828	0.644181533	FALSE
720	PF3D7_0618500.1o1_6121	-0.373328857	-0.562782506	0.512417796	-0.18945365	0.190519585	0.635660862	FALSE
721	PF3D7_0618700.1o2_6708	0.185359244	0.079878596	0.349211394	-0.105480648	0.356193771	0.635660862	FALSE
722	PF3D7_0618900.2o10_5031	-0.536822293	-0.586294141	0.206070917	-0.049471848	0.578274472	0.702244096	FALSE
723	PF3D7_0618900.iso2.exon2.amp1_2167	0.12169724	0.061507924	0.117357013	-0.060189316	0.749655225	0.816782781	FALSE
724	PF3D7_0619000.1.12o14_6224	-0.845027206	-1.10554166	0.555366123	-0.260514455	0.160219291	0.635660862	FALSE
725	PF3D7_0619000.1.e12_5382	-0.742758628	-0.894064992	0.378140736	-0.151306364	0.320312516	0.635660862	FALSE
726	PF3D7_0619000.1.s1 (renamed)_5662	-0.379009083	-0.415770358	0.174387398	-0.036761276	0.636937602	0.7398397	FALSE
727	PF3D7_0619000.iso2.exon13.amp1_3564	-0.472552031	-0.694202081	0.437107799	-0.22165005	0.256207925	0.635660862	FALSE
728	PF3D7_0619400.iso1.exon1.amp1_727	-0.052423272	-0.296422023	0.886845858	-0.243998752	0.040492815	0.635660862	FALSE
729	PF3D7_0619400.iso1.exon2.amp1_2684	-0.286574473	-0.544137077	0.405268278	-0.257562603	0.2893514	0.635660862	FALSE
730	PF3D7_0619700.iso1.exon2.amp1_2417	-0.408216579	-0.468884826	0.371656969	-0.060668247	0.328094391	0.635660862	FALSE
731	PF3D7_0619900.iso1.exon1.amp1_2419	-1.045525986	-1.224079639	0.548697276	-0.178553653	0.164614444	0.635660862	FALSE
732	PF3D7_0620000.1o1_5588	0.05304693	-0.050268004	0.320822019	-0.103314934	0.39434829	0.637915196	FALSE
733	PF3D7_0620100.2o2_6690	-0.362695673	-0.455373268	0.17593759	-0.092677596	0.633996291	0.737951681	FALSE
734	PF3D7_0620200.1o1_6128	-0.050385792	-0.265735219	0.257939917	-0.215349427	0.489343855	0.659673158	FALSE
735	PF3D7_0620400.1o1_7613	0.606152644	0.445851547	0.314921695	-0.160301097	0.402647932	0.638828732	FALSE
736	PF3D7_0620600.1o1_5842	0.055842581	-0.118503689	0.328647253	-0.17434627	0.383537687	0.635660862	FALSE
737	PF3D7_0621200.iso1.exon1.amp1_1855	-0.29092301	-0.498316362	0.368854574	-0.207393352	0.331504062	0.635660862	FALSE
738	PF3D7_0621400.1o1_8784	-0.403721916	-0.510195111	0.654679819	-0.106473195	0.106498864	0.635660862	FALSE
739	PF3D7_0621900.1o1_7648	-0.958078795	-1.196655522	0.351005161	-0.238576726	0.353881489	0.635660862	FALSE
740	PF3D7_0622000.iso1.exon1.amp1_2087	-0.157713339	-0.456306463	0.594432876	-0.298593124	0.136587202	0.635660862	FALSE
741	PF3D7_0622000.iso1.exon3.amp1_2970	-0.01220493	-0.159519022	0.538673997	-0.147314092	0.17142938	0.635660862	FALSE
742	PF3D7_0622100.iso1.exon1.amp1_seg1_3159	-0.657134094	-0.890082454	0.639051227	-0.23294836	0.113628392	0.635660862	FALSE
743	PF3D7_0622100.iso1.exon1.amp2_seg2_2303	-0.331785174	-0.430099117	0.423598136	-0.098313943	0.269858917	0.635660862	FALSE
744	PF3D7_0622800.s1 (renamed)_4799	0.264515941	0.096864233	0.374358863	-0.167651708	0.324833441	0.635660862	FALSE
745	PF3D7_0622800.s2 (renamed)_5666	-0.056174415	-0.056604383	0.001084378	-0.000429968	0.997638402	0.997638402	FALSE
746	PF3D7_0623300.iso1.exon4.amp1_75	-0.443149577	-0.505554489	0.417650656	-0.062404912	0.27605983	0.635660862	FALSE
747	PF3D7_0623400.1o1_5006	-0.067004123	-0.119838654	0.30830562	-0.052834532	0.412106153	0.638828732	FALSE
748	PF3D7_0623700.iso1.exon1.amp2_4528	-0.381534178	-0.503847	0.255408469	-0.122312823	0.493467555	0.661068441	FALSE
749	PF3D7_0623800.iso1.exon1.amp3_470	-0.577878409	-0.55046589	0.135464361	0.027412519	0.712977849	0.789881426	FALSE
750	PF3D7_0623900.1o1_5269	-0.331796324	-0.356883301	0.084015448	-0.025086977	0.818972251	0.863632265	FALSE
751	PF3D7_0624500.iso1.exon1.amp1_1536	-0.34913536	-0.525609835	0.53627369	-0.176474476	0.173099301	0.635660862	FALSE
752	PF3D7_0624600.iso1.exon1.amp2_2263	-0.009844179	-0.169117971	0.435686288	-0.159273792	0.257616205	0.635660862	FALSE
753	PF3D7_0624900.iso1.exon8.amp1_2391	-0.358415941	-0.49049835	0.487663784	-0.132082408	0.210249588	0.635660862	FALSE
754	PF3D7_0625000.iso2.exon1.amp1_1527	0.029749539	0.090052916	0.065912497	0.060303377	0.857396364	0.891743103	FALSE
755	PF3D7_0625400.1o1_5288	-0.15989601	-0.232989547	0.278707667	-0.073093538	0.456380129	0.644181533	FALSE
756	PF3D7_0625500.1o1_7006	-0.534610206	-0.629476465	0.241497697	-0.094866259	0.51653203	0.671156539	FALSE
757	PF3D7_0625600.1o1_7626	-0.528578771	-0.666756007	0.315347664	-0.138177235	0.402044474	0.638828732	FALSE
758	PF3D7_0626100.iso1.exon2.amp1_4098	-0.39019365	-0.720331473	0.466462111	-0.330137823	0.228565835	0.635660862	FALSE
759	PF3D7_0626600.1o1_6969	-0.198977498	-0.400009172	0.328247398	-0.201031673	0.384084656	0.635660862	FALSE
760	PF3D7_0626800.iso1.exon1.amp1_2938	-0.276975259	-0.598209967	0.431996943	-0.321234708	0.261301895	0.635660862	FALSE
761	PF3D7_0626800.iso1.exon2.amp1_1841	-0.537415727	-0.735339913	0.502063137	-0.197924186	0.198561813	0.635660862	FALSE
762	PF3D7_0626800.iso1.exon3.amp1_689	0.523584819	0.245251131	0.50701153	-0.278333688	0.194681271	0.635660862	FALSE
763	PF3D7_0626900.1o1_4986	0.592199917	0.565236915	0.071575604	-0.026963003	0.845326041	0.88213406	FALSE
764	PF3D7_0627000.1o1_6672	-0.324150828	-0.163701781	0.358451296	0.160449047	0.344407206	0.635660862	FALSE
765	PF3D7_0627100.iso1.exon1.amp1_4595	-0.107081646	-0.191935161	0.204429524	-0.084853515	0.581236242	0.704620157	FALSE
766	PF3D7_0627400.1o1_5247	-0.242234211	-0.447557004	0.331791565	-0.205322793	0.379256891	0.635660862	FALSE
767	PF3D7_0628000.1o1_7263	-0.132080031	-0.353279405	0.28495075	-0.221199374	0.446775418	0.644181533	FALSE
768	PF3D7_0628100.iso1.exon1.amp10_2250	-0.705682484	-0.823650348	0.420187537	-0.117967864	0.273400416	0.635660862	FALSE
769	PF3D7_0628100.iso1.exon1.amp11_1613	-0.348026743	-0.465006465	0.243484465	-0.116979722	0.513196337	0.668845721	FALSE
770	PF3D7_0628100.iso1.exon1.amp6_2244	-0.676401137	-0.87978741	0.958364263	-0.203386273	0.030170054	0.635660862	FALSE
771	PF3D7_0628100.iso1.exon1.amp7_1383	-0.286082469	-0.380465879	0.353400785	-0.09438341	0.350811523	0.635660862	FALSE
772	PF3D7_0628100.iso1.exon1.amp9_1961	0.948249168	0.759862783	0.499853605	-0.188386386	0.200316779	0.635660862	FALSE
773	PF3D7_0628200.s1_6574	-0.291221927	-0.507972724	0.345021609	-0.216750797	0.361640091	0.635660862	FALSE
774	PF3D7_0628200.s2 (renamed)_6863	0.290082099	0.148948708	0.384684387	-0.141133392	0.312609326	0.635660862	FALSE
775	PF3D7_0628600.iso1.exon3.amp1_4371	-0.492750121	-0.772272498	0.578188883	-0.279522376	0.145987351	0.635660862	FALSE
776	PF3D7_0629000.iso1.exon1.amp1_120	-0.354005866	-0.588757896	0.613381442	-0.23475203	0.1263438	0.635660862	FALSE
777	PF3D7_0629300.1o1_7935	-0.505187814	-0.622015669	0.389417309	-0.116827855	0.307131372	0.635660862	FALSE
778	PF3D7_0629500.1o2_8488	-0.84309029	-0.987011812	0.414011334	-0.143921523	0.279912618	0.635660862	FALSE
779	PF3D7_0629600.iso1.exon2.amp1_3286	-0.441213137	-0.600937973	0.990339976	-0.159724836	0.026482186	0.635660862	FALSE
780	PF3D7_0629700.s3 (renamed)_7149	-0.29719781	-0.388169678	0.290637416	-0.090971868	0.438150204	0.643875771	FALSE
781	PF3D7_0629700.s5 (renamed)_7727	0.021842372	-0.076771573	0.263415889	-0.098613945	0.480501701	0.654743154	FALSE
782	PF3D7_0629900.iso1.exon1.amp1_3279	-1.03465393	-1.312023972	0.51897225	-0.277370041	0.185581611	0.635660862	FALSE
783	PF3D7_0630300.iso1.exon2.amp3_4257	-0.157070946	-0.293669947	0.240742159	-0.136599001	0.517804154	0.671254206	FALSE
784	PF3D7_0630600.2o2_8237	0.678644889	0.575651469	0.29414552	-0.10299342	0.432888164	0.641615803	FALSE
785	PF3D7_0631000.iso1.exon1.amp1_2426	-0.752790763	-0.882481996	0.558248948	-0.129691233	0.158353109	0.635660862	FALSE
786	PF3D7_0631100.iso1.exon2.amp1_1011	-0.075349904	-0.330954108	0.441919823	-0.255604204	0.251489216	0.635660862	FALSE
787	PF3D7_0631400.iso1.exon1.amp1_1562	0.263954875	0.030070754	0.772817772	-0.233884122	0.065075405	0.635660862	FALSE
788	PF3D7_0631800.iso1.exon2.amp1_3318	0.100381634	-0.047162553	0.416815149	-0.147544187	0.27694041	0.635660862	FALSE
789	PF3D7_0631900.iso1.exon2.amp1_3298	0.571249178	0.377514846	0.512013461	-0.193734332	0.190828046	0.635660862	FALSE
790	PF3D7_0632000.iso1.exon2.amp1_3020	0.468448598	0.180701748	0.544367582	-0.28774685	0.167527133	0.635660862	FALSE
791	PF3D7_0632100.iso1.exon1.amp1_705	-0.528939931	-0.616592651	0.501628816	-0.08765272	0.198905692	0.635660862	FALSE
792	PF3D7_0632200.iso1.exon1.amp1_3015	0.761647963	0.513395613	0.359639191	-0.248252349	0.342914236	0.635660862	FALSE
793	PF3D7_0632300.iso1.exon2.amp1_423	-0.092630786	-0.183298098	0.257148204	-0.090667312	0.490631097	0.660138962	FALSE
794	PF3D7_0632400.iso1.exon2.amp1_3304	1.137383339	0.762126488	0.479707172	-0.375256851	0.216966122	0.635660862	FALSE
795	PF3D7_0632500.iso1.exon1.amp1_3326	0.625879868	0.171249687	0.789505868	-0.454630181	0.060696217	0.635660862	FALSE
796	PF3D7_0632500.iso1.exon2.amp1_1064	-0.043633054	-0.327950428	0.5688349	-0.284317374	0.151671802	0.635660862	FALSE
797	PF3D7_0632500.iso1.exon2.amp3_492	-0.505598803	-0.617956414	0.348634979	-0.112357612	0.35693928	0.635660862	FALSE
798	PF3D7_0632500.iso1.exon2.amp4_seg2_4605	-0.268836368	-0.394461347	0.814277679	-0.12562498	0.05473845	0.635660862	FALSE
799	PF3D7_0632700.iso1.exon2.amp1_2437	0.925016182	0.670491056	0.605926252	-0.254525126	0.130283951	0.635660862	FALSE
800	PF3D7_0632800.iso1.exon1.amp1_4482	-0.007545136	-0.252051078	0.715759975	-0.244505943	0.082583285	0.635660862	FALSE
801	PF3D7_0700100.iso1.exon3.amp1_1301	1.133217553	0.996245616	0.406753969	-0.136971937	0.28772917	0.635660862	FALSE
802	PF3D7_0700200.iso1.exon3.amp1_994	0.363247531	0.185299909	0.410448459	-0.177947623	0.283727712	0.635660862	FALSE
803	PF3D7_0700300.iso1.exon3.amp1_3589	-0.411098817	-0.58912484	0.577183005	-0.178026023	0.14658894	0.635660862	FALSE
804	PF3D7_0700400.iso1.exon3.amp1_4165	0.847421823	0.534864821	0.646846588	-0.312557003	0.110016546	0.635660862	FALSE
805	PF3D7_0700500.iso1.exon3.amp1_2741	0.566080986	0.413215079	0.473073437	-0.152865907	0.222709648	0.635660862	FALSE
806	PF3D7_0701000.1o1_5806	0.924433223	0.755197354	0.297993251	-0.169235869	0.427168424	0.640696288	FALSE
807	PF3D7_0701100.iso1.exon3.amp1_2151	1.10320091	0.724540594	0.525115293	-0.378660316	0.181058964	0.635660862	FALSE
808	PF3D7_0701600.iso1.exon2.amp1_4435	0.189290817	-0.092814328	0.670772196	-0.282105145	0.099610885	0.635660862	FALSE
809	PF3D7_0701800.iso1.exon1.amp1_3301	0.520440063	0.275683053	0.68151071	-0.24475701	0.095257792	0.635660862	FALSE
810	PF3D7_0701900.e2s1_9111	-0.047308963	-0.04372957	0.007488794	0.003579392	0.983691995	0.987566185	FALSE
811	PF3D7_0702200.1o1_5873	-0.354138442	-0.559935518	0.507009	-0.205797076	0.194683238	0.635660862	FALSE
812	PF3D7_0702300.2o2_7331	0.990401556	0.733062544	0.318988216	-0.257339012	0.396914129	0.63867593	FALSE
813	PF3D7_0702300.e2_6828	-0.492106108	-0.620095486	0.348428707	-0.127989378	0.357206356	0.635660862	FALSE
814	PF3D7_0702400.e1s1_8040	-0.027315129	-0.257519748	0.403896873	-0.230204619	0.29085553	0.635660862	FALSE
815	PF3D7_0702500.e1s1_8598	-0.497847595	-0.699943084	0.330821841	-0.202095489	0.380573259	0.635660862	FALSE
816	PF3D7_0702600.iso1.exon1.amp1_3842	-0.300544431	-0.399249547	0.224253229	-0.098705116	0.546057313	0.682024368	FALSE
817	PF3D7_0703100.1o1_5246	0.078297119	-0.194938048	0.353471117	-0.273235166	0.350721706	0.635660862	FALSE
818	PF3D7_0703200.iso1.exon1.amp1_4307	-0.612099267	-0.708993285	0.39765576	-0.096894018	0.297782109	0.635660862	FALSE
819	PF3D7_0703300.iso1.exon1.amp1_3572	-0.998786153	-1.013873193	0.097877227	-0.01508704	0.789900423	0.844983779	FALSE
820	PF3D7_0703500.e2s2_7503	1.720567415	1.406384867	0.434817199	-0.314182548	0.258480438	0.635660862	FALSE
821	PF3D7_0703700.e1s1_8629	0.307655532	0.066540681	0.50686923	-0.241114851	0.194791907	0.635660862	FALSE
822	PF3D7_0704000.iso1.exon1.amp1_seg1_3736	-0.253098386	-0.399896693	0.237340592	-0.146798307	0.523556045	0.674655859	FALSE
823	PF3D7_0704200.iso1.exon1.amp1_252	-0.363264665	-0.472925102	0.60820634	-0.109660437	0.129066682	0.635660862	FALSE
824	PF3D7_0704200.iso1.exon1.amp2_769	0.066858836	-0.101119214	0.459293687	-0.16797805	0.235066665	0.635660862	FALSE
825	PF3D7_0704300.s1_6860	-0.436170906	-0.554030313	0.756226434	-0.117859407	0.069744282	0.635660862	FALSE
826	PF3D7_0704500.iso1.exon1.amp2_178	-0.394142969	-0.413287335	0.069505686	-0.019144365	0.849732885	0.885414719	FALSE
827	PF3D7_0704600.iso1.exon5.amp3_seg1_283	-0.099977782	-0.138541425	0.140165106	-0.038563643	0.703583085	0.783005107	FALSE
828	PF3D7_0704800.iso1.exon1.amp1_3430	-0.590426661	-0.711143569	0.481135766	-0.120716908	0.215746421	0.635660862	FALSE
829	PF3D7_0704800.iso1.exon1.amp2_1629	-0.205286639	-0.247752856	0.198813543	-0.042466217	0.591435317	0.710228963	FALSE
830	PF3D7_0704900.iso1.exon1.amp1_3311	0.102065096	-0.100105173	0.662464913	-0.202170269	0.103110781	0.635660862	FALSE
831	PF3D7_0705000.e1s1_7991	0.593422689	0.490180142	0.270923019	-0.103242547	0.468554428	0.648960613	FALSE
832	PF3D7_0705000.e1s2_6251	-0.684373961	-0.799167535	0.708294605	-0.114793574	0.085196135	0.635660862	FALSE
833	PF3D7_0705500.iso1.exon2.amp2_3383	0.632415559	0.525969992	0.149627567	-0.106445567	0.684840518	0.770666438	FALSE
834	PF3D7_0705500.iso1.exon2.amp3_1354	-0.390110907	-0.47959745	0.481460795	-0.089486543	0.215469763	0.635660862	FALSE
835	PF3D7_0705600.iso1.exon1.amp2_4245	-0.27315324	-0.461581861	0.862673861	-0.188428621	0.04475829	0.635660862	FALSE
836	PF3D7_0706500.iso1.exon1.amp1_3144	-0.803206013	-0.858171373	0.094094943	-0.05496536	0.797799604	0.847680973	FALSE
837	PF3D7_0706700.1o1_8234	-0.205688423	-0.465973788	0.48805833	-0.260285364	0.209921371	0.635660862	FALSE
838	PF3D7_0707200.iso1.exon1.amp1_1982	-0.916988746	-1.031908502	0.754847867	-0.114919756	0.070147008	0.635660862	FALSE
839	PF3D7_0707300.2o5_6209	-0.311893338	-0.729842488	0.542334243	-0.41794915	0.168911284	0.635660862	FALSE
840	PF3D7_0707400.iso1.exon1.amp1_1310	0.298214959	0.313982797	0.048599224	0.015767838	0.894538033	0.91945918	FALSE
841	PF3D7_0707500.iso1.exon1.amp2_467	-0.947320897	-1.075811222	0.507277718	-0.128490324	0.194474466	0.635660862	FALSE
842	PF3D7_0707700.1o1_5353	-0.005547765	-0.144127214	0.307448303	-0.138579448	0.413343502	0.638828732	FALSE
843	PF3D7_0708000.e1s1_9235	-0.838002045	-0.994827818	0.366096403	-0.156825772	0.334887269	0.635660862	FALSE
844	PF3D7_0708000.e2s1_8905	-0.477325101	-0.619844385	0.436262129	-0.142519285	0.257044933	0.635660862	FALSE
845	PF3D7_0708400.e1_5679	-0.6226701	-0.766448951	0.4637516	-0.143778852	0.231005303	0.635660862	FALSE
846	PF3D7_0708400.e2_6536	-0.625892339	-0.749546029	0.282204327	-0.123653689	0.450983219	0.644181533	FALSE
847	PF3D7_0709000.e3s1_5972	-0.486955606	-0.8428616	0.568485559	-0.355905994	0.151888043	0.635660862	FALSE
848	PF3D7_0709100.e1s1_4890	-0.7826078	-0.902877414	0.330783115	-0.120269614	0.380625901	0.635660862	FALSE
849	PF3D7_0709300.iso1.exon1.amp3_2493	-0.152724457	-0.301357257	0.313987228	-0.148632799	0.403974097	0.638828732	FALSE
850	PF3D7_0709400.iso1.exon2.amp1_2171	0.658802881	0.480878971	0.375567465	-0.177923911	0.323383149	0.635660862	FALSE
851	PF3D7_0709700.e1s1_7479	-0.43595472	-0.561127296	0.327696502	-0.125172576	0.384839194	0.635660862	FALSE
852	PF3D7_0709900.3o3_8531	-0.228933979	-0.387071961	0.340287098	-0.158137982	0.367871209	0.635660862	FALSE
853	PF3D7_0709900.e1s2_8563	-0.853058527	-0.941879295	0.896978915	-0.088820769	0.038831552	0.635660862	FALSE
854	PF3D7_0709900.e2_7429	-0.361401581	-0.497326151	0.382536855	-0.135924569	0.315120794	0.635660862	FALSE
855	PF3D7_0709900.e3_5674	-0.011407246	-0.109854177	0.177836181	-0.098446931	0.630403579	0.73492418	FALSE
856	PF3D7_0710200.iso1.exon1.amp2_seg1_3742	-0.544594433	-0.856321754	0.684198477	-0.311727321	0.094197658	0.635660862	FALSE
857	PF3D7_0710200.iso1.exon1.amp3_3649	-0.82999014	-0.812654907	0.063433486	0.017335233	0.862693236	0.894928536	FALSE
858	PF3D7_0710300.iso1.exon2.amp1_2630	-0.706312034	-0.950272329	0.440702607	-0.243960295	0.252675771	0.635660862	FALSE
859	PF3D7_0710400_9160	-0.240442596	-0.482477248	0.4026683	-0.242034652	0.292208467	0.635660862	FALSE
860	PF3D7_0710500.iso1.exon5.amp1_1229	-0.685740211	-0.736385294	0.264554558	-0.050645083	0.478676538	0.653779353	FALSE
861	PF3D7_0711000.e1s1_7491	-0.323951638	-0.555020139	0.409938132	-0.231068501	0.284277683	0.635660862	FALSE
862	PF3D7_0711000.e1s2_8942	-0.772820989	-0.875269377	0.422517463	-0.102448388	0.270976878	0.635660862	FALSE
863	PF3D7_0711100.iso1.exon1.amp1_1552	-0.302315934	-0.358662889	0.175122373	-0.056346956	0.635542193	0.738830974	FALSE
864	PF3D7_0711200.iso1.exon1.amp1_2331	-0.793041011	-0.632777952	0.528727666	0.160263059	0.178446388	0.635660862	FALSE
865	PF3D7_0711300.iso1.exon1.amp1_3846	-0.505013076	-0.605412788	0.669643434	-0.100399712	0.100079563	0.635660862	FALSE
866	PF3D7_0711700.e2s1_5452	1.635649613	1.530830028	0.256890403	-0.104819585	0.491050737	0.660386699	FALSE
867	PF3D7_0712000.iso1.exon1.amp1_145	0.995617959	0.925626712	0.111912007	-0.069991247	0.760827064	0.826242869	FALSE
868	PF3D7_0712300.iso1.exon1.amp1_3615	0.748389944	0.684039602	0.120259098	-0.064350342	0.743726861	0.812088812	FALSE
869	PF3D7_0712400.iso1.exon1.amp1_1004	0.865070427	0.783926617	0.22548209	-0.08114381	0.543919684	0.68153677	FALSE
870	PF3D7_0712400.iso1.exon2.amp2_2529	-0.398579811	-0.480915	0.240878073	-0.082335189	0.517575166	0.671254206	FALSE
871	PF3D7_0712600.iso1.exon1.amp1_434	0.53122982	0.418179466	0.214072644	-0.113050355	0.563961536	0.694657009	FALSE
872	PF3D7_0712800.iso1.exon1.amp1_3904	0.497601823	0.429974321	0.117150927	-0.067627503	0.750076912	0.816782781	FALSE
873	PF3D7_0712800.iso1.exon2.amp2_1944	-0.675204463	-0.795138509	0.531195246	-0.119934046	0.176681525	0.635660862	FALSE
874	PF3D7_0712900.iso1.exon1.amp1_3316	0.488145754	0.382210482	0.18108235	-0.105935272	0.624285636	0.732446382	FALSE
875	PF3D7_0712900.iso1.exon2.amp2_215	-0.651759147	-0.656395983	0.054900232	-0.004636836	0.880982362	0.909191956	FALSE
876	PF3D7_0713000.iso1.exon2.amp1_2451	-0.352941765	-0.424098623	0.411324336	-0.071156858	0.282785853	0.635660862	FALSE
877	PF3D7_0713100.2o2_5537	-0.225047301	-0.348440171	0.447322669	-0.12339287	0.246279784	0.635660862	FALSE
878	PF3D7_0713600.iso1.exon1.amp1_3623	-0.459281587	-0.612206654	0.367128942	-0.152925067	0.333617564	0.635660862	FALSE
879	PF3D7_0713900.e1s1_5647	-0.907825858	-0.995593303	0.331489081	-0.087767446	0.379667135	0.635660862	FALSE
880	PF3D7_0713900.e1s3_8249	-0.380546341	-0.502983262	0.348480437	-0.122436922	0.357139363	0.635660862	FALSE
881	PF3D7_0713900.e1s4_5937	0.594349189	0.288188189	0.344415958	-0.306160999	0.362432648	0.635660862	FALSE
882	PF3D7_0714000.e1s1_6579	-0.599563773	-0.678881995	0.193557505	-0.079318222	0.601071419	0.716278903	FALSE
883	PF3D7_0714200.iso1.exon1.amp2_463	-0.403288581	-0.401878322	0.008981167	0.001410259	0.980442855	0.98642331	FALSE
884	PF3D7_0715000.1o1_5833	-0.342107477	-0.504040437	0.387111133	-0.16193296	0.309790788	0.635660862	FALSE
885	PF3D7_0715300.1o3_4714	-0.32446933	-0.429126359	0.416556902	-0.104657029	0.277213062	0.635660862	FALSE
886	PF3D7_0715600.1o1_6202	-0.786025944	-0.864623979	0.262696294	-0.078598035	0.481657528	0.655462561	FALSE
887	PF3D7_0715800.1o1_6729	-0.658859094	-0.815624744	0.280689909	-0.15676565	0.453315193	0.644181533	FALSE
888	PF3D7_0716200.1o1_8223	-0.333708793	-0.297707524	0.129959191	0.036001269	0.724048506	0.798675063	FALSE
889	PF3D7_0716300.e1s1_8921	0.710006213	0.64505796	0.164070841	-0.064948252	0.656689213	0.753111064	FALSE
890	PF3D7_0717000.iso1.exon2.amp1_1484	-0.541995223	-0.850934445	0.519199229	-0.308939222	0.185412701	0.635660862	FALSE
891	PF3D7_0717200.1o2_8169	0.191536877	0.063782864	0.223046381	-0.127754014	0.548161613	0.682842212	FALSE
892	PF3D7_0717300.1o4_7894	-0.445483323	-0.613419115	0.249825123	-0.167935793	0.502643077	0.663351418	FALSE
893	PF3D7_0717500.e1s1_5155	-0.402616165	-0.612089804	0.336580031	-0.209473639	0.372807042	0.635660862	FALSE
894	PF3D7_0717700.e1s1_9221	-0.473467463	-0.574049109	0.469515182	-0.100581646	0.225844977	0.635660862	FALSE
895	PF3D7_0718000.e11s1_8030	-0.887512664	-1.125282197	0.390197705	-0.237769533	0.306235643	0.635660862	FALSE
896	PF3D7_0718000.e4s1_4866	-0.183724266	-0.445965772	0.47104855	-0.262241506	0.224489159	0.635660862	FALSE
897	PF3D7_0718000.e5s1_8036	-0.71910022	-0.864057181	0.248833589	-0.144956961	0.504284049	0.663855621	FALSE
898	PF3D7_0718000.e9s3_8251	-0.82024394	-0.970859535	0.388004387	-0.150615595	0.308758509	0.635660862	FALSE
899	PF3D7_0718000.e9s4_5939	-0.423306569	-0.658680722	0.764987632	-0.235374154	0.067238421	0.635660862	FALSE
900	PF3D7_0718100.iso1.exon1.amp2_1370	-0.047597044	-0.125418508	0.216942557	-0.077821463	0.558879338	0.691875348	FALSE
901	PF3D7_0718300.e5s1_8050	-0.326029572	-0.318995728	0.023723791	0.007033844	0.948377636	0.960712027	FALSE
902	PF3D7_0718300.e7s1_4783	-0.1652593	-0.378189134	0.310398311	-0.212929834	0.409097128	0.638828732	FALSE
903	PF3D7_0718600.iso1.exon6.amp1_3617	-0.198621158	-0.367855658	0.471003021	-0.1692345	0.224529314	0.635660862	FALSE
904	PF3D7_0718600.iso1.exon8.amp1_4159	-0.547376781	-0.636690156	0.225735872	-0.089313375	0.543478861	0.68153677	FALSE
905	PF3D7_0718800.iso1.exon4.amp1_3221	-0.499092937	-0.802156319	0.587644123	-0.303063382	0.140444378	0.635660862	FALSE
906	PF3D7_0719000.1o1_5524	-0.755074895	-0.721426463	0.081433256	0.033648433	0.824423301	0.866772754	FALSE
907	PF3D7_0719100.iso1.exon2.amp1_947	-0.124288384	-0.264806709	0.395711318	-0.140518326	0.299967517	0.635660862	FALSE
908	PF3D7_0719200.e1s1_7415	-0.466958866	-0.735824525	0.443694083	-0.268865659	0.249768174	0.635660862	FALSE
909	PF3D7_0719200.e9s1_8565	-0.339434524	-0.572927153	0.518833236	-0.233492629	0.185685129	0.635660862	FALSE
910	PF3D7_0719400.s1_5695	-1.105498653	-1.173428498	0.143889335	-0.067929846	0.696179066	0.778654209	FALSE
911	PF3D7_0719500.1o2_8186	-0.207108263	-0.213498455	0.032320988	-0.006390193	0.929721892	0.945571341	FALSE
912	PF3D7_0719500.2o2_9047	-0.507194219	-0.658176526	0.363183624	-0.150982307	0.338489646	0.635660862	FALSE
913	PF3D7_0719600.e2_5954	-0.423074403	-0.548501282	0.339712285	-0.125426879	0.368633274	0.635660862	FALSE
914	PF3D7_0719700 (renamed)_9040	2.072862314	1.979357881	0.289953182	-0.093504433	0.43918177	0.644181533	FALSE
915	PF3D7_0719700.e3s1_7128	-0.093993353	-0.181417536	0.293779155	-0.087424183	0.433435597	0.641615803	FALSE
916	PF3D7_0721000.iso1.exon1.amp1_1958	0.359420025	-0.033780652	0.513399827	-0.393200677	0.189772277	0.635660862	FALSE
917	PF3D7_0721000.iso1.exon1.amp2_2247	0.026992991	-0.135327626	0.439110631	-0.162320617	0.254234849	0.635660862	FALSE
918	PF3D7_0721100_5690	0.429935386	0.392722143	0.108224244	-0.037213243	0.768428571	0.833207159	FALSE
919	PF3D7_0721600.e2s1_4856	-0.370874031	-0.534259626	0.5387561	-0.163385595	0.171372522	0.635660862	FALSE
920	PF3D7_0721700_4819	-0.696332706	-0.854981597	0.484704237	-0.158648891	0.212726112	0.635660862	FALSE
921	PF3D7_0722600.e1s1_6051	-0.49848541	-0.577903483	0.362377801	-0.079418074	0.339491612	0.635660862	FALSE
922	PF3D7_0722800.1o1_5891	0.672258889	0.634977431	0.162555786	-0.037281458	0.659615342	0.756157571	FALSE
923	PF3D7_0723000.iso1.exon1.amp1_3306	-0.020922449	-0.02476091	0.005193219	-0.00383846	0.988690463	0.990810599	FALSE
924	PF3D7_0723200.e4s1_7754	-0.579009519	-0.789349128	0.347828976	-0.210339609	0.357983746	0.635660862	FALSE
925	PF3D7_0723400.e1s2_6637	-0.966189468	-1.046369551	0.381408683	-0.080180082	0.316446647	0.635660862	FALSE
926	PF3D7_0723500_4823	-0.686493097	-0.878302232	0.411117309	-0.191809135	0.283008242	0.635660862	FALSE
927	PF3D7_0723700.iso1.exon1.amp2_1934	-0.495658004	-0.694794003	0.693030031	-0.199135999	0.090794951	0.635660862	FALSE
928	PF3D7_0723800.iso1.exon1.amp3_2230	-0.695104469	-0.842124804	0.889832355	-0.147020336	0.039995699	0.635660862	FALSE
929	PF3D7_0723800.iso1.exon2.amp1_2646	-0.023713038	-0.331236495	0.536562327	-0.307523458	0.17289771	0.635660862	FALSE
930	PF3D7_0723900.e1s2_5176	0.035317841	-0.031446951	0.198815063	-0.066764792	0.591432543	0.710228963	FALSE
931	PF3D7_0724300.iso1.exon1.amp1_112	-0.605849844	-0.620034402	0.103467487	-0.014184559	0.778273951	0.838693374	FALSE
932	PF3D7_0724400.iso1.exon1.amp1_2105	-0.586034769	-0.714166964	0.461789647	-0.128132196	0.232785163	0.635660862	FALSE
933	PF3D7_0724700.e2s2_8380	-0.326689377	-0.600422894	0.620740121	-0.273733518	0.122566002	0.635660862	FALSE
934	PF3D7_0725100.e1s1_5471	-0.433580583	-0.566761317	0.51500474	-0.133180734	0.188556653	0.635660862	FALSE
935	PF3D7_0725200.iso1.exon3.amp1_3844	-0.286401407	-0.450709155	0.650270719	-0.164307748	0.108465267	0.635660862	FALSE
936	PF3D7_0726100.2o2_6782	-0.535400747	-0.707047147	0.458243201	-0.1716464	0.236032671	0.635660862	FALSE
937	PF3D7_0726200.iso1.exon2.amp1_1023	0.173795802	0.119934311	0.214240194	-0.053861491	0.56366408	0.694657009	FALSE
938	PF3D7_0726400.e1s1_6882	-0.174664449	-0.238123908	0.199069605	-0.063459459	0.590968097	0.710228963	FALSE
939	PF3D7_0726400.e1s3_8538	-0.813001845	-1.001878145	0.532479082	-0.1888763	0.175769603	0.635660862	FALSE
940	PF3D7_0726400.e2s1_8610	-0.460103706	-0.826944872	0.507947868	-0.366841166	0.193954691	0.635660862	FALSE
941	PF3D7_0726400.e2s2_9247	-0.526067106	-0.680335256	0.396260803	-0.15426815	0.299348613	0.635660862	FALSE
942	PF3D7_0726400.e3s1_8933	-0.298990518	-0.39754546	0.461706979	-0.098554942	0.23286042	0.635660862	FALSE
943	PF3D7_0726400.e6s1_8651	-0.987940259	-1.275710941	0.519241331	-0.287770681	0.185381385	0.635660862	FALSE
944	PF3D7_0726400.e6s2_4899	0.324775886	0.086434173	0.427217763	-0.238341713	0.26614259	0.635660862	FALSE
945	PF3D7_0726500.iso1.exon4.amp1_3386	-0.288180936	-0.565092284	0.717442934	-0.276911348	0.082005286	0.635660862	FALSE
946	PF3D7_0726500.iso1.exon4.amp2_2525	-0.426770721	-0.5636539	0.371194242	-0.136883179	0.328655463	0.635660862	FALSE
947	PF3D7_0726600.1o2_6479	0.016246046	-0.16421294	0.388209843	-0.180458986	0.308521471	0.635660862	FALSE
948	PF3D7_0727000.iso1.exon1.amp1_1996	-0.702019408	-0.748182477	0.312302461	-0.046163068	0.406373153	0.638828732	FALSE
949	PF3D7_0727200.1o1_6756	-0.106187555	-0.170700954	0.253973849	-0.064513399	0.495814638	0.66171549	FALSE
950	PF3D7_0727800.iso1.exon1.amp1_4594	0.461126468	0.256065523	0.740379768	-0.205060946	0.074516425	0.635660862	FALSE
951	PF3D7_0727900.e1s2_5080	-0.686783485	-0.848254162	0.28959559	-0.161470677	0.439721564	0.644181533	FALSE
952	PF3D7_0728000.e2_6530	-1.131661921	-1.209086497	0.330424185	-0.077424577	0.381114059	0.635660862	FALSE
953	PF3D7_0728200.2o2_7918	-0.690881292	-0.731717439	0.117157641	-0.040836147	0.750063174	0.816782781	FALSE
954	PF3D7_0728300.iso1.exon1.amp1_984	-0.392675824	-0.52397552	0.48100603	-0.131299696	0.215856936	0.635660862	FALSE
955	PF3D7_0728600.iso1.exon1.amp1_205	-0.909060418	-0.958691672	0.237966541	-0.049631254	0.522494582	0.673907455	FALSE
956	PF3D7_0728600.iso1.exon3.amp1_2396	-0.060364655	-0.306506429	0.584009721	-0.246141774	0.142551208	0.635660862	FALSE
957	PF3D7_0728700.iso1.exon3.amp1_1258	-0.216963189	-0.437252368	0.464615187	-0.220289179	0.230225624	0.635660862	FALSE
958	PF3D7_0728800.iso1.exon1.amp1_4481	-0.626929055	-0.65059185	0.120253162	-0.023662795	0.743738969	0.812088812	FALSE
959	PF3D7_0729500.iso1.exon1.amp1_1884	-0.45076323	-0.570980103	0.457095858	-0.120216874	0.23709167	0.635660862	FALSE
960	PF3D7_0729700.iso1.exon2.amp1_1872	-0.134932241	-0.264505549	0.485911134	-0.129573308	0.211713093	0.635660862	FALSE
961	PF3D7_0729800.iso1.exon1.amp1_365	-0.310302199	-0.565552479	0.529036867	-0.25525028	0.178224365	0.635660862	FALSE
962	PF3D7_0729900.e1s1_5072	-0.709171406	-0.895751701	0.40856178	-0.186580295	0.285765357	0.635660862	FALSE
963	PF3D7_0730000.iso1.exon1.amp1_348	-0.751824487	-0.849840796	0.629800653	-0.098016308	0.11806253	0.635660862	FALSE
964	PF3D7_0730300.e1s1_5186	-0.639402568	-0.792155252	0.454003795	-0.152752684	0.239966121	0.635660862	FALSE
965	PF3D7_0730300.e1s2_5758	0.093394155	-0.118402392	0.278289951	-0.211796547	0.457027818	0.644181533	FALSE
966	PF3D7_0730500.e1s3_7387	-0.15782886	-0.251768137	0.716564189	-0.093939277	0.082306583	0.635660862	FALSE
967	PF3D7_0730800.1.e2s1_5161	-0.974034688	-1.135239356	0.511793003	-0.161204668	0.190996419	0.635660862	FALSE
968	PF3D7_0730800.iso2.exon2.amp1_1557	-0.712906394	-0.840705033	0.624857316	-0.127798639	0.120499586	0.635660862	FALSE
969	PF3D7_0730900.e1s1_8316	-0.129122782	-0.309937766	0.211229187	-0.180814984	0.569023708	0.697629852	FALSE
970	PF3D7_0730900.e2s1_8659	-0.157589508	-0.398477964	0.462237845	-0.240888457	0.232377517	0.635660862	FALSE
971	PF3D7_0731100.2o2_6789	0.289014171	-0.082133573	0.489955205	-0.371147744	0.208349714	0.635660862	FALSE
972	PF3D7_0731200.2o2_8439	0.494250538	0.222999765	0.649238099	-0.271250773	0.10893085	0.635660862	FALSE
973	PF3D7_0731500.s1 (renamed)_7684	-0.958380949	-1.101822974	0.309758639	-0.143442026	0.410015192	0.638828732	FALSE
974	PF3D7_0731500.s2 (renamed)_7112	-0.275565261	-0.353788938	0.337133869	-0.078223677	0.372066444	0.635660862	FALSE
975	PF3D7_0731600.e1s1_6357	0.034184889	-0.310609022	0.71608388	-0.344793911	0.08247173	0.635660862	FALSE
976	PF3D7_0732000.iso1.exon2.amp1_690	1.562080938	1.280739964	0.560589718	-0.281340974	0.156852646	0.635660862	FALSE
977	PF3D7_0732200.iso1.exon2.amp1_1297	1.067194035	0.866866977	0.618687233	-0.200327058	0.123608943	0.635660862	FALSE
978	PF3D7_0732300.iso1.exon1.amp1_4175	-0.316229793	-0.511799966	0.726915284	-0.195570173	0.078826036	0.635660862	FALSE
979	PF3D7_0732400.iso1.exon1.amp1_2443	-0.827689402	-0.923841576	0.473839894	-0.096152173	0.222039299	0.635660862	FALSE
980	PF3D7_0732500.iso1.exon1.amp1_135	-0.538674641	-0.707934636	1.168568609	-0.169259994	0.013027024	0.635660862	FALSE
981	PF3D7_0732700.iso1.exon2.amp1_712	0.836796685	0.636993133	0.374054234	-0.199803552	0.325199805	0.635660862	FALSE
982	PF3D7_0732900.iso1.exon2.amp1_996	1.009425392	0.644162495	0.44632068	-0.365262896	0.247238861	0.635660862	FALSE
983	PF3D7_0733000.iso1.exon1.amp1_3621	0.334048061	0.245366065	0.224685691	-0.088681996	0.545304455	0.681639961	FALSE
984	PF3D7_0733000.iso1.exon2.amp3_1942	-0.450630049	-0.649665177	0.73661233	-0.199035128	0.075698091	0.635660862	FALSE
985	PF3D7_0800100.iso1.exon1.amp1_723	0.67178339	0.472431532	0.425530872	-0.199351859	0.267869153	0.635660862	FALSE
986	PF3D7_0800100.iso1.exon2.amp1_3980	-0.426939172	-0.493819493	0.358217292	-0.066880321	0.344701906	0.635660862	FALSE
987	PF3D7_0800100.iso1.exon2.amp2_4269	-0.593553348	-0.562688401	0.080729965	0.030864947	0.825909776	0.867035197	FALSE
988	PF3D7_0800200.e1s1_8827	-0.324214505	-0.421255839	0.349550556	-0.097041333	0.355755676	0.635660862	FALSE
989	PF3D7_0800200.e1s2_5359	-1.221448201	-1.282024885	0.27379761	-0.060576684	0.464033376	0.647810461	FALSE
990	PF3D7_0800200.e2s1_5745	1.56418995	1.442030728	0.149716586	-0.122159222	0.684665294	0.770666438	FALSE
991	PF3D7_0800300.e1s3_8831	-0.566510925	-0.838615118	0.401093845	-0.272104192	0.293949863	0.635660862	FALSE
992	PF3D7_0800300.e2s1_8914	1.706100802	1.489431278	0.499813956	-0.216669524	0.200348397	0.635660862	FALSE
993	PF3D7_0800400.iso1.exon3.amp1_128	0.469672029	0.302081889	0.384464921	-0.167590139	0.312865243	0.635660862	FALSE
994	PF3D7_0800500.iso1.exon2.amp1_3888	0.467212959	0.283279149	0.456498306	-0.18393381	0.237644836	0.635660862	FALSE
995	PF3D7_0800700.e1s1_6606	-0.26317331	-0.415493945	0.356969369	-0.152320635	0.346276839	0.635660862	FALSE
996	PF3D7_0800700.e3s1_5772	-0.251675037	-0.4456913	0.255583497	-0.194016264	0.493181703	0.661068441	FALSE
997	PF3D7_0801000.e2s1_5460	0.822584662	0.517453565	0.422069781	-0.305131098	0.271441143	0.635660862	FALSE
998	PF3D7_0801000.e2s2_6911	1.096123718	1.025765002	0.180516685	-0.070358717	0.625349462	0.732448306	FALSE
999	PF3D7_0801600.1o1_8124	-0.234431951	-0.508348689	0.348674816	-0.273916738	0.356887718	0.635660862	FALSE
1000	PF3D7_0801700.1o3_5645	-0.807821139	-0.863545783	0.135507854	-0.055724644	0.712890677	0.789881426	FALSE
1001	PF3D7_0801800_4835	-0.579157014	-0.681999657	0.349085908	-0.102842643	0.356355966	0.635660862	FALSE
1002	PF3D7_0801900.iso1.exon1.amp5_1622	-0.960755761	-1.058265699	0.232714396	-0.097509938	0.531442917	0.677439621	FALSE
1003	PF3D7_0802000.e1s1_5197	-0.089880769	-0.274929866	0.247991573	-0.185049098	0.505680289	0.664751529	FALSE
1004	PF3D7_0802000.e1s2_6642	-0.563352847	-0.658174823	0.283229272	-0.094821976	0.449409689	0.644181533	FALSE
1005	PF3D7_0802300.iso1.exon1.amp1_1413	-0.420665274	-0.531977298	0.426581576	-0.111312024	0.266792635	0.635660862	FALSE
1006	PF3D7_0802300.iso1.exon1.amp2_1927	-0.446618962	-0.511638335	0.169548767	-0.065019373	0.646163396	0.744574115	FALSE
1007	PF3D7_0802600.iso1.exon3.amp1_1656	-0.36575132	-0.508620447	0.561888316	-0.142869127	0.15602592	0.635660862	FALSE
1008	PF3D7_0802600.iso1.exon6.amp1_2681	-0.460982152	-0.546887236	0.828611094	-0.085905084	0.051565945	0.635660862	FALSE
1009	PF3D7_0802800.2o2_8482	-0.474118539	-0.661612747	0.371154916	-0.187494208	0.328703183	0.635660862	FALSE
1010	PF3D7_0803200.iso1.exon1.amp1_3327	-0.436305356	-0.488849264	0.212411787	-0.052543908	0.566915108	0.695985097	FALSE
1011	PF3D7_0803400.iso1.exon1.amp1_4581	0.583086225	0.440163589	0.199064653	-0.142922636	0.590977131	0.710228963	FALSE
1012	PF3D7_0803400.iso1.exon1.amp2_3948	0.558280895	0.344807526	0.342131645	-0.213473368	0.3654339	0.635660862	FALSE
1013	PF3D7_0804000.iso1.exon1.amp1_4456	0.21541921	-0.012259269	0.502859082	-0.227678479	0.197932994	0.635660862	FALSE
1014	PF3D7_0804000.iso1.exon2.amp1_3276	-0.337328128	-0.394499756	0.190151107	-0.057171628	0.607362697	0.719495143	FALSE
1015	PF3D7_0804500.e1s1_5404	-0.641167727	-0.858620472	0.356358329	-0.217452745	0.347050044	0.635660862	FALSE
1016	PF3D7_0804500.e2s2_5372	-0.375615552	-0.503150082	0.26262073	-0.127534531	0.481779008	0.655462561	FALSE
1017	PF3D7_0804500.e2s3_4800	-0.571432194	-0.587802513	0.06397499	-0.016370318	0.861535553	0.894195508	FALSE
1018	PF3D7_0804500.e3_7398	-0.932098479	-1.067683798	0.660000063	-0.135585319	0.104172019	0.635660862	FALSE
1019	PF3D7_0804600.1o1_6746	-0.796591766	-1.045814249	0.36678797	-0.249222483	0.334036434	0.635660862	FALSE
1020	PF3D7_0804800.e1s1_5442	-0.367837188	-0.527242088	0.337402789	-0.1594049	0.371707244	0.635660862	FALSE
1021	PF3D7_0804900.1o1_6159	-0.084100805	-0.217558973	0.388643396	-0.133458168	0.308021756	0.635660862	FALSE
1022	PF3D7_0805100.iso1.exon1.amp1_3626	-0.670738687	-0.754162062	0.345595613	-0.083423374	0.360890177	0.635660862	FALSE
1023	PF3D7_0805300.iso1.exon1.amp2_1057	-0.470245271	-0.486006605	0.064098031	-0.015761334	0.861272554	0.894195508	FALSE
1024	PF3D7_0805400.1o6_8716	-0.384447618	-0.669045075	0.4046755	-0.284597457	0.290000758	0.635660862	FALSE
1025	PF3D7_0805700.iso1.exon1.amp2_3399	-0.872052845	-1.004712846	0.689434154	-0.132660001	0.092165612	0.635660862	FALSE
1026	PF3D7_0806000.iso1.exon1.amp2_515	-1.624190137	-1.637320086	0.022061769	-0.01312995	0.951988592	0.964021673	FALSE
1027	PF3D7_0806200.10o10_8244	-0.735358261	-0.865033011	0.223670439	-0.129674751	0.547072872	0.682684617	FALSE
1028	PF3D7_0806300.iso1.exon1.amp1_485	-0.658055096	-0.8076495	0.592573635	-0.149594404	0.137633531	0.635660862	FALSE
1029	PF3D7_0806300.iso1.exon2.amp1_3830	-0.64340668	-0.722461079	0.481748667	-0.0790544	0.215224994	0.635660862	FALSE
1030	PF3D7_0806500.e1s1_5475	-0.760613272	-0.781620552	0.096817555	-0.02100728	0.792110891	0.844983779	FALSE
1031	PF3D7_0806600.e2s1_5153	-0.437484072	-0.641861723	0.600641669	-0.204377651	0.133147193	0.635660862	FALSE
1032	PF3D7_0806600.e3s1_8038	-0.217314796	-0.405523836	0.455135783	-0.18820904	0.238910326	0.635660862	FALSE
1033	PF3D7_0806600.e5s1_5749	-0.321327369	-0.388667897	0.421601824	-0.067340529	0.271927149	0.635660862	FALSE
1034	PF3D7_0806700.iso1.exon1.amp1_1804	-0.318798478	-0.602305681	0.36941408	-0.283507204	0.330821077	0.635660862	FALSE
1035	PF3D7_0806700.iso1.exon3.amp3_1358	-0.533189768	-0.636471056	0.752078717	-0.103281288	0.070963016	0.635660862	FALSE
1036	PF3D7_0806800.e1s1_8932	-0.5273423	-0.652548386	0.254271589	-0.125206086	0.495326926	0.661379381	FALSE
1037	PF3D7_0806900.iso1.exon1.amp1_704	-0.63738256	-0.811666169	0.459721937	-0.174283609	0.234673839	0.635660862	FALSE
1038	PF3D7_0807100.iso1.exon1.amp2_3363	-0.68818015	-0.75595053	0.357887012	-0.067770381	0.345118188	0.635660862	FALSE
1039	PF3D7_0807700.1o5_5328	-0.746913412	-0.852781595	0.538378173	-0.105868183	0.171634389	0.635660862	FALSE
1040	PF3D7_0807700.5o5_5617	-0.369247687	-0.388729374	0.070083059	-0.019481687	0.848503073	0.884461939	FALSE
1041	PF3D7_0807800.e2s1_6602	0.148715581	-0.089162428	0.369592931	-0.237878009	0.33060299	0.635660862	FALSE
1042	PF3D7_0808100.iso1.exon2.amp1_3829	-0.294846151	-0.541280996	0.507945412	-0.246434845	0.193956593	0.635660862	FALSE
1043	PF3D7_0808100.iso1.exon3.amp1_3963	-0.07980621	-0.262347819	0.283049108	-0.182541609	0.449686006	0.644181533	FALSE
1044	PF3D7_0808200.e1s1_9217	1.174703636	0.983549441	1.468538139	-0.191154195	0.004275526	0.635660862	FALSE
1045	PF3D7_0808400.1o1_4673	-0.596134822	-0.757960509	0.334928692	-0.161825687	0.375021869	0.635660862	FALSE
1046	PF3D7_0808600.e1s2_6520	-0.613744748	-0.751609512	0.356671605	-0.137864764	0.346653461	0.635660862	FALSE
1047	PF3D7_0808600.e2s1_8343	0.82791614	0.683022803	0.241812507	-0.144893337	0.516002561	0.670940785	FALSE
1048	PF3D7_0808700.iso1.exon1.amp1_3035	0.261880152	0.208875795	0.107754503	-0.053004357	0.769398826	0.833936725	FALSE
1049	PF3D7_0808700.iso1.exon2.amp1_2238	-0.277716986	-0.494660057	0.560354604	-0.216943072	0.15700276	0.635660862	FALSE
1050	PF3D7_0808800.iso1.exon1.amp1_3594	0.128820312	0.01345201	0.415108272	-0.115368302	0.27874665	0.635660862	FALSE
1051	PF3D7_0808900.iso1.exon1.amp1_4458	-0.105375153	-0.229718494	0.472584714	-0.12434334	0.223138013	0.635660862	FALSE
1052	PF3D7_0809100.iso1.exon1.amp1_4184	0.178144654	0.086860376	0.154003482	-0.091284278	0.676251832	0.765836081	FALSE
1053	PF3D7_0809100.iso1.exon2.amp1_1077	-0.234135754	-0.439833061	0.338480266	-0.205697307	0.37027069	0.635660862	FALSE
1054	PF3D7_0809100.iso1.exon2.amp2_seg2_2600	-0.671078112	-0.670509969	0.003579622	0.000568144	0.992204307	0.993437816	FALSE
1055	PF3D7_0809200.e1s2_6342	0.008229498	-0.259890207	0.624462549	-0.268119705	0.120696267	0.635660862	FALSE
1056	PF3D7_0809500.iso1.exon1.amp1_3552	-0.615228794	-0.686538207	0.29146514	-0.071309413	0.436904594	0.643424622	FALSE
1057	PF3D7_0809600.iso1.exon1.amp4_seg1_2308	-0.29646659	-0.502976311	0.682590427	-0.206509721	0.094830525	0.635660862	FALSE
1058	PF3D7_0809900.iso1.exon1.amp1_seg2_287	-0.338332506	-0.270024028	0.102937695	0.068308478	0.779373245	0.839216226	FALSE
1059	PF3D7_0809900.iso1.exon1.amp2_seg2_576	-0.307532019	-0.254510785	0.087402266	0.053021235	0.811838915	0.857399743	FALSE
1060	PF3D7_0810300.2o4_8207	-0.410912591	-0.478387179	0.285625992	-0.067474588	0.445745083	0.644181533	FALSE
1061	PF3D7_0810800.e2s1_9231	0.20831247	0.080817392	0.336119711	-0.127495078	0.373423437	0.635660862	FALSE
1062	PF3D7_0810900.1.1o2_7001	-0.426569036	-0.592307647	0.357980621	-0.165738611	0.345000164	0.635660862	FALSE
1063	PF3D7_0811600.e2s1_6045	-0.594626809	-0.70916654	0.280000238	-0.114539732	0.454379942	0.644181533	FALSE
1064	PF3D7_0811600.e2s2_7207	-0.484988786	-0.688985903	0.480640489	-0.203997117	0.216168591	0.635660862	FALSE
1065	PF3D7_0812100.e1s1_5364	-0.56703914	-0.694010155	0.431003531	-0.126971015	0.26230192	0.635660862	FALSE
1066	PF3D7_0812400.e1s1_6614	-0.560181165	-0.685942436	1.092971519	-0.125761271	0.017532754	0.635660862	FALSE
1067	PF3D7_0812600.iso1.exon2.amp1_4140	-0.304870941	-0.541404943	0.780595753	-0.236534002	0.06299607	0.635660862	FALSE
1068	PF3D7_0812700.1o1_7561	0.487830778	0.377831943	0.400549957	-0.109998835	0.294553397	0.635660862	FALSE
1069	PF3D7_0812900.2o2_8824	-0.490878916	-0.599976014	0.550040762	-0.109097098	0.163720168	0.635660862	FALSE
1070	PF3D7_0813400.e2s1_6043	0.203417307	-0.117203172	0.448973132	-0.320620479	0.244706963	0.635660862	FALSE
1071	PF3D7_0813700.iso1.exon1.amp2_2781	-0.85678994	-0.911370269	0.266250658	-0.054580329	0.475966493	0.651983413	FALSE
1072	PF3D7_0813900.e2s1_8892	-0.416456342	-0.634201489	0.494002197	-0.217745147	0.20503143	0.635660862	FALSE
1073	PF3D7_0814600.e1s1_5462	-0.592160524	-0.790608135	0.436626373	-0.198447611	0.256684136	0.635660862	FALSE
1074	PF3D7_0815100.iso1.exon1.amp1_2474	-0.547615753	-0.927880588	0.31752582	-0.380264834	0.398969132	0.63870662	FALSE
1075	PF3D7_0815300.iso1.exon1.amp1_4308	-0.337372343	-0.514438838	0.480644025	-0.177066495	0.216165574	0.635660862	FALSE
1076	PF3D7_0815300.iso1.exon1.amp2_seg1_2595	-0.263957974	-0.327216044	0.113523966	-0.06325807	0.757513186	0.823920471	FALSE
1077	PF3D7_0815400.e1s1_8889	-0.978975535	-1.104810634	0.342371739	-0.125835099	0.36511756	0.635660862	FALSE
1078	PF3D7_0815500.3o5_7032	0.769263502	0.568630499	0.338593456	-0.200633003	0.370120024	0.635660862	FALSE
1079	PF3D7_0816100.1o4_7264	-0.6845335	-0.89486406	0.278838397	-0.210330559	0.456177555	0.644181533	FALSE
1080	PF3D7_0816200.1o1_6682	0.060418419	-0.010872779	0.288573277	-0.071291199	0.441267342	0.644181533	FALSE
1081	PF3D7_0816500.e2s1_4845	-0.475718572	-0.586263934	0.337283405	-0.110545362	0.371866675	0.635660862	FALSE
1082	PF3D7_0816600.e1s1_6325	-0.262923696	-0.39694612	0.61879793	-0.134022424	0.123552489	0.635660862	FALSE
1083	PF3D7_0816700.iso1.exon3.amp1_4095	-0.152743262	-0.376008809	0.407902823	-0.223265547	0.28647989	0.635660862	FALSE
1084	PF3D7_0817300.e1s3_7500	1.170965971	0.826195756	0.452648362	-0.344770215	0.241235614	0.635660862	FALSE
1085	PF3D7_0817700.iso1.exon14.amp1_1790	-0.695899422	-1.062010024	0.465531918	-0.366110603	0.229400471	0.635660862	FALSE
1086	PF3D7_0817700.iso1.exon15.amp1_2691	-0.471460128	-0.577102328	0.480854315	-0.1056422	0.215986238	0.635660862	FALSE
1087	PF3D7_0818500.e2_5381	-0.80970382	-0.935453447	0.498442173	-0.125749627	0.201445076	0.635660862	FALSE
1088	PF3D7_0818900_4784	1.06345998	0.849622133	0.368550294	-0.213837848	0.331875964	0.635660862	FALSE
1089	PF3D7_0819600.2o2_6409	-0.439318583	-0.561430558	0.279026151	-0.122111975	0.455886728	0.644181533	FALSE
1090	PF3D7_0819800.e4s1_8607	-0.299600387	-0.616819316	0.462372346	-0.317218929	0.232255306	0.635660862	FALSE
1091	PF3D7_0820600.3o3_6147	-0.301347258	-0.454411404	0.398398755	-0.153064146	0.296950485	0.635660862	FALSE
1092	PF3D7_0821000.1o5_7907	-0.365585976	-0.53834239	0.316544368	-0.172756414	0.400352693	0.638828732	FALSE
1093	PF3D7_0821300.iso1.exon1.amp1_3317	-0.791777017	-0.924666411	0.766301029	-0.132889394	0.066870629	0.635660862	FALSE
1094	PF3D7_0821300.iso1.exon3.amp1_3898	-0.396808611	-0.625365112	0.445513621	-0.228556501	0.248013683	0.635660862	FALSE
1095	PF3D7_0821500.1o1_8442	0.430054042	0.022756333	0.455404052	-0.407297709	0.238660703	0.635660862	FALSE
1096	PF3D7_0821600.1o1_4738	-0.466904779	-0.553651676	0.339707537	-0.086746898	0.368639574	0.635660862	FALSE
1097	PF3D7_0822600.e2s1_7209	-1.186714869	-1.403477664	0.3855611	-0.216762795	0.311588691	0.635660862	FALSE
1098	PF3D7_0823300 (renamed, has duplicates)_6432	1.409704251	1.31582179	0.285288979	-0.09388246	0.446259116	0.644181533	FALSE
1099	PF3D7_0823300.e1s1_7488	-0.347374426	-0.552803298	0.717494678	-0.205428872	0.081987578	0.635660862	FALSE
1100	PF3D7_0823300.e1s2_7199	0.229995193	-0.053834485	0.521666507	-0.283829678	0.183585586	0.635660862	FALSE
1101	PF3D7_0823500.1o1_5877	-0.048223899	0.022080705	0.251311414	0.070304604	0.500189781	0.662415459	FALSE
1102	PF3D7_0823800_6524	-0.897745889	-0.990603801	0.54823713	-0.092857912	0.164921768	0.635660862	FALSE
1103	PF3D7_0823900.1o1_8440	0.380601824	0.14420779	0.299674191	-0.236394034	0.424686669	0.640679519	FALSE
1104	PF3D7_0824200.iso1.exon2.amp1_seg1_3174	-0.306620276	-0.4530537	0.531959837	-0.146433425	0.17613791	0.635660862	FALSE
1105	PF3D7_0824200.iso1.exon2.amp2_seg1_3463	0.221334479	0.021670477	0.482572474	-0.199664001	0.214525889	0.635660862	FALSE
1106	PF3D7_0824600.1o5_8431	-0.555127307	-0.653308194	0.217586189	-0.098180887	0.557743312	0.690853474	FALSE
1107	PF3D7_0824700.iso1.exon16.amp1_3245	0.077312354	-0.290509585	0.465299066	-0.367821939	0.229609817	0.635660862	FALSE
1108	PF3D7_0825200.iso1.exon1.amp1_2065	-0.661793634	-0.77060969	0.589089429	-0.108816056	0.139614706	0.635660862	FALSE
1109	PF3D7_0825200.iso1.exon4.amp1_4086	-0.569485862	-0.709518688	0.327529499	-0.140032826	0.385068151	0.635660862	FALSE
1110	PF3D7_0825600.iso1.exon1.amp1_3549	-0.652551339	-0.678682495	0.17185431	-0.026131156	0.641758961	0.741023487	FALSE
1111	PF3D7_0825800.iso1.exon1.amp1_1307	-0.01383606	-0.203394914	0.433812398	-0.189558854	0.259482691	0.635660862	FALSE
1112	PF3D7_0826000.iso1.exon1.amp2_3371	-0.475853494	-0.627389861	0.670441907	-0.151536367	0.099747804	0.635660862	FALSE
1113	PF3D7_0826100.s1_5414	-0.609334099	-0.750763023	0.386978908	-0.141428924	0.309943831	0.635660862	FALSE
1114	PF3D7_0826100.s2_5703	-0.33616366	-0.494830461	0.297490524	-0.158666801	0.427912663	0.640876713	FALSE
1115	PF3D7_0826100.s3_8299	-0.351967471	-0.515262314	0.259795712	-0.163294843	0.486335276	0.657197163	FALSE
1116	PF3D7_0826100.s4_8588	0.120908797	0.057864369	0.273493368	-0.063044428	0.464510465	0.647810461	FALSE
1117	PF3D7_0826100.s8_8594	-0.408161056	-0.596854724	0.353154788	-0.188693668	0.351125809	0.635660862	FALSE
1118	PF3D7_0826300.1o1_6730	0.025532347	-0.216048862	0.586612719	-0.241581209	0.141039282	0.635660862	FALSE
1119	PF3D7_0826400.iso1.exon6.amp1_665	-0.172648421	-0.341940938	0.834382568	-0.169292518	0.050342008	0.635660862	FALSE
1120	PF3D7_0826500.e1s1_5469	-0.577516909	-0.758918116	0.399733703	-0.181401206	0.295461075	0.635660862	FALSE
1121	PF3D7_0826500.e1s2_5180	-0.476323843	-0.677414143	0.287995162	-0.2010903	0.442143163	0.644181533	FALSE
1122	PF3D7_0826700.e2_6241	-0.114357674	-0.410773513	0.334136397	-0.296415838	0.376088051	0.635660862	FALSE
1123	PF3D7_0827100.s2_5089	-0.760157736	-0.898071915	0.271185861	-0.137914179	0.468139801	0.648960613	FALSE
1124	PF3D7_0827600.2o2_6223	0.841133019	0.668380653	0.350188006	-0.172752366	0.35493341	0.635660862	FALSE
1125	PF3D7_0827800.e1s1_6935	-0.641886263	-0.60423207	0.184220623	0.037654193	0.618401089	0.72734759	FALSE
1126	PF3D7_0827800.e1s3_6929	-0.111084452	-0.406102241	0.516541043	-0.295017789	0.187399582	0.635660862	FALSE
1127	PF3D7_0827900.e2_7119	-0.314456632	-0.443194445	0.530235715	-0.128737814	0.177365903	0.635660862	FALSE
1128	PF3D7_0828100.iso1.exon3.amp1_1012	-0.494268445	-0.685216382	0.385806824	-0.190947937	0.311303112	0.635660862	FALSE
1129	PF3D7_0828200.iso1.exon1.amp2_1624	-0.348325299	-0.361526092	0.091524806	-0.013200793	0.803181852	0.851238757	FALSE
1130	PF3D7_0828400.1o1_8192	-0.194761189	-0.341500633	0.424248484	-0.146739444	0.269187997	0.635660862	FALSE
1131	PF3D7_0828500.4o4_8157	-0.593586558	-0.822803224	0.34786152	-0.229216667	0.357941528	0.635660862	FALSE
1132	PF3D7_0829000.e2s1_7406	-0.971352325	-0.953393451	0.02079691	0.017958874	0.954737475	0.965758975	FALSE
1133	PF3D7_0829600.1o1_8708	-0.777885474	-0.943195482	0.333869001	-0.165310009	0.3764484	0.635660862	FALSE
1134	PF3D7_0830600.2o2_6153	-0.537069738	-0.562325367	0.103530569	-0.025255629	0.778143096	0.838693374	FALSE
1135	PF3D7_0830800.iso1.exon1.amp1_1373	0.208753577	0.08465597	0.340130999	-0.124097608	0.36807804	0.635660862	FALSE
1136	PF3D7_0830800.iso1.exon1.amp2_4505	-0.125498555	-0.300736113	0.630011116	-0.175237558	0.117959827	0.635660862	FALSE
1137	PF3D7_0830800.iso1.exon2.amp1_1892	-0.524935266	-0.609231274	0.439240698	-0.084296009	0.254107163	0.635660862	FALSE
1138	PF3D7_0831100.iso1.exon1.amp2_3348	-0.798902559	-0.848140529	0.193130797	-0.04923797	0.601857528	0.716409986	FALSE
1139	PF3D7_0831100.iso1.exon2.amp1_4116	0.040459707	-0.050498889	0.199773864	-0.090958596	0.589684156	0.710228963	FALSE
1140	PF3D7_0831200.iso1.exon1.amp1_2190	-0.036090555	-0.212509256	0.601377102	-0.1764187	0.13274519	0.635660862	FALSE
1141	PF3D7_0831300.2o2_7356	-0.324250106	-0.693921468	0.687013027	-0.369671362	0.093099895	0.635660862	FALSE
1142	PF3D7_0831400.2o2_8450	0.927090371	0.47719143	0.604807387	-0.449898941	0.130885253	0.635660862	FALSE
1143	PF3D7_0831500.iso1.exon2.amp1_2951	0.628863334	0.414379054	0.381436683	-0.21448428	0.316413687	0.635660862	FALSE
1144	PF3D7_0831500.iso1.exon3.amp1_1846	-0.676977826	-0.765841349	0.471213131	-0.088863523	0.22434406	0.635660862	FALSE
1145	PF3D7_0831700.2o2_5026	0.355062178	0.156341449	0.372767331	-0.198720728	0.326751143	0.635660862	FALSE
1146	PF3D7_0831800.2o2_5849	-0.190352057	-0.256959733	0.244879534	-0.066607676	0.510862316	0.66872877	FALSE
1147	PF3D7_0832000.iso1.exon3.amp1_1848	-0.539783861	-0.743526505	0.643977258	-0.203742644	0.111332944	0.635660862	FALSE
1148	PF3D7_0832300.2o2_7858	0.186422657	0.221776866	0.125808073	0.03535421	0.732443488	0.805084884	FALSE
1149	PF3D7_0832400.iso1.exon3.amp1_1853	0.468829372	0.210139111	0.727929111	-0.258690262	0.078493088	0.635660862	FALSE
1150	PF3D7_0832800.iso1.exon3.amp1_1854	0.844585931	0.601886954	0.468347992	-0.242698978	0.226881807	0.635660862	FALSE
1151	PF3D7_0832900.iso1.exon3.amp1_986	1.125823765	0.864070763	0.456211252	-0.261753002	0.237910965	0.635660862	FALSE
1152	PF3D7_0833000.iso1.exon3.amp1_3881	0.804029339	0.522702674	0.481372541	-0.281326665	0.215544852	0.635660862	FALSE
1153	PF3D7_0833100.iso1.exon3.amp1_4170	-0.250377852	-0.608264034	0.531934612	-0.357886182	0.17615582	0.635660862	FALSE
1154	PF3D7_0833200.iso1.exon3.amp1_3030	-0.352841614	-0.446007053	0.213855663	-0.093165439	0.564346885	0.694657009	FALSE
1155	PF3D7_0833300.iso1.exon1.amp1_1870	0.832404208	0.529709896	0.399571261	-0.302694312	0.295641985	0.635660862	FALSE
1156	PF3D7_0833400.iso1.exon3.amp1_4185	0.419437321	0.282635116	0.329392883	-0.136802205	0.382519286	0.635660862	FALSE
1157	PF3D7_0833500.iso1.exon3.amp1_3614	0.818150839	0.6128035	0.447887556	-0.205347339	0.245740497	0.635660862	FALSE
1158	PF3D7_0900100.iso1.exon2.amp1_151	0.995781146	0.879887062	0.28637593	-0.115894085	0.444602717	0.644181533	FALSE
1159	PF3D7_0900200.e2s1_8924	0.409117256	0.216170675	0.39719045	-0.192946581	0.298303894	0.635660862	FALSE
1160	PF3D7_0900300.iso1.exon1.amp1_1001	-0.249317073	-0.466305741	0.434902659	-0.216988668	0.258395347	0.635660862	FALSE
1161	PF3D7_0900400.iso1.exon2.amp1_1867	0.184386574	-0.010322664	0.489773167	-0.194709238	0.208500087	0.635660862	FALSE
1162	PF3D7_0900500.iso1.exon1.amp1_4464	0.053005984	-0.128458698	0.609799841	-0.181464682	0.128222376	0.635660862	FALSE
1163	PF3D7_0900600.iso1.exon1.amp1_424	0.038068239	-0.247447483	0.450284298	-0.285515721	0.243463635	0.635660862	FALSE
1164	PF3D7_0900700.iso1.exon1.amp1_2726	-0.627875317	-0.729341427	0.3196445	-0.10146611	0.395994448	0.63867593	FALSE
1165	PF3D7_0900900.iso1.exon1.amp1_4454	1.199143251	0.977341809	0.528067275	-0.221801442	0.178921427	0.635660862	FALSE
1166	PF3D7_0901000.iso1.exon1.amp1_3010	0.926779002	0.968116041	0.153770923	0.041337039	0.676706996	0.765869208	FALSE
1167	PF3D7_0901100.iso1.exon1.amp1_3608	0.030937145	-0.123482768	0.545471462	-0.154419913	0.16678006	0.635660862	FALSE
1168	PF3D7_0901300.iso1.exon2.amp1_1859	0.458581582	0.175439713	0.482718384	-0.28314187	0.214402275	0.635660862	FALSE
1169	PF3D7_0901400.iso1.exon2.amp1_711	-0.38507459	-0.579160017	0.392699946	-0.194085428	0.3033779	0.635660862	FALSE
1170	PF3D7_0901500.iso1.exon2.amp1_4476	0.914408135	0.667488277	0.631370949	-0.246919858	0.117298307	0.635660862	FALSE
1171	PF3D7_0901600.iso1.exon2.amp1_1269	0.693776523	0.326378802	0.679824842	-0.367397721	0.095928691	0.635660862	FALSE
1172	PF3D7_0901800.2o2_8725	0.109511968	-0.018888447	0.277319943	-0.128400415	0.458534305	0.644181533	FALSE
1173	PF3D7_0902200.2o3_7910	0.001367871	-0.164498693	0.307535169	-0.165866563	0.413218007	0.638828732	FALSE
1174	PF3D7_0902300.2o3_7037	-0.402919076	-0.462246207	0.297122999	-0.05932713	0.428457335	0.640876713	FALSE
1175	PF3D7_0902400.iso1.exon2.amp1_1014	-0.616039804	-0.762444593	0.617340913	-0.146404788	0.124297511	0.635660862	FALSE
1176	PF3D7_0902600.2o3_8194	-0.695845266	-0.770530233	0.277817155	-0.074684967	0.457761676	0.644181533	FALSE
1177	PF3D7_0902800.2o4_7652	-0.488326208	-0.630563281	0.533830416	-0.142237073	0.174814375	0.635660862	FALSE
1178	PF3D7_0902800.4o4_7941	0.273955315	0.122581024	0.313872776	-0.151374292	0.404136744	0.638828732	FALSE
1179	PF3D7_0902900.1o1_8123	0.09221242	-0.106815368	0.281836383	-0.199027788	0.45154903	0.644181533	FALSE
1180	PF3D7_0903000.1o1_9002	-0.104360914	-0.161256713	0.197377423	-0.0568958	0.594059562	0.712160331	FALSE
1181	PF3D7_0903000_5973	-0.050238094	-0.119301661	0.296702917	-0.069063567	0.429080499	0.640991859	FALSE
1182	PF3D7_0903300.iso1.exon1.amp3_3123	-0.783329695	-0.820865181	0.236354191	-0.037535486	0.525231499	0.674988095	FALSE
1183	PF3D7_0903300.iso1.exon1.amp4_1038	-0.181557732	-0.227661673	0.254739398	-0.046103941	0.494561267	0.661129561	FALSE
1184	PF3D7_0903400.e1s3_8886	-0.300038269	-0.48705015	0.477347295	-0.187011881	0.218994227	0.635660862	FALSE
1185	PF3D7_0903500.e1s1_7220	1.239902704	1.05837671	0.253120994	-0.181525995	0.497213391	0.661877712	FALSE
1186	PF3D7_0903500.e1s2_7214	1.30655924	1.13547176	0.513197384	-0.17108748	0.189926116	0.635660862	FALSE
1187	PF3D7_0903700.e3s1_4884	0.352136067	0.144193618	0.337779509	-0.207942449	0.371204499	0.635660862	FALSE
1188	PF3D7_0903800.iso1.exon2.amp1_1662	-0.809538421	-0.926996438	0.297056486	-0.117458017	0.428555959	0.640876713	FALSE
1189	PF3D7_0903800.iso1.exon2.amp2_3644	-0.040361913	-0.24453311	0.269990734	-0.204171198	0.470027095	0.648960613	FALSE
1190	PF3D7_0904900.e1s1_8018	-0.563680931	-0.579200123	0.089421235	-0.015519192	0.807595599	0.85452757	FALSE
1191	PF3D7_0904900.e1s3_6567	-0.641316886	-0.731439889	0.31595748	-0.090123003	0.401181721	0.638828732	FALSE
1192	PF3D7_0905100.iso1.exon2.amp1_4406	-0.222474667	-0.383102574	0.251045466	-0.160627907	0.500628186	0.662415459	FALSE
1193	PF3D7_0905100.iso1.exon3.amp1_1647	0.658922691	0.603848506	0.130498656	-0.055074185	0.722960475	0.798102823	FALSE
1194	PF3D7_0905300.s5_9157	-0.63557824	-0.823046081	0.390602511	-0.18746784	0.305771848	0.635660862	FALSE
1195	PF3D7_0905300.s6_8296	0.180178693	-0.022776836	0.284873969	-0.202955529	0.446892683	0.644181533	FALSE
1196	PF3D7_0905300.s7_8001	-0.223567668	-0.44961035	0.592520009	-0.226042682	0.137663822	0.635660862	FALSE
1197	PF3D7_0905400.e7s1_7466	0.048776032	-0.114350612	0.328331253	-0.163126644	0.383969901	0.635660862	FALSE
1198	PF3D7_0905600.2o2_5648	-0.783928369	-0.846609421	0.234938127	-0.062681052	0.527642631	0.676502029	FALSE
1199	PF3D7_0905900.iso1.exon1.amp1_3487	-0.403556267	-0.458940838	0.199557292	-0.055384571	0.590078823	0.710228963	FALSE
1200	PF3D7_0905900.iso1.exon1.amp2_seg1_1439	-0.530495072	-0.64614663	0.490591378	-0.115651558	0.207824953	0.635660862	FALSE
1201	PF3D7_0906200.1o1_7631	-0.292546319	-0.577459499	0.363934844	-0.28491318	0.337557668	0.635660862	FALSE
1202	PF3D7_0906300.1o1_4700	-0.328394421	-0.433505696	0.323548859	-0.105111275	0.390555698	0.636855536	FALSE
1203	PF3D7_0906400.e1s1_9120	-0.820288503	-0.885041112	0.281157031	-0.064752609	0.452595006	0.644181533	FALSE
1204	PF3D7_0906500.1o1_4999	1.129027523	0.936831825	0.422300438	-0.192195698	0.271201859	0.635660862	FALSE
1205	PF3D7_0906900.1o2_5563	-0.35487568	-0.500289592	0.295322146	-0.145413912	0.431133336	0.641534251	FALSE
1206	PF3D7_0907200.e1s2_8934	-0.02546131	-0.107932917	0.388836858	-0.082471608	0.307798983	0.635660862	FALSE
1207	PF3D7_0907600.iso1.exon2.amp1_4206	-0.553897126	-0.625574611	0.136327436	-0.071677486	0.711248864	0.789213223	FALSE
1208	PF3D7_0907700.e1s1_8630	0.205127289	0.011373618	0.685306126	-0.19375367	0.093764136	0.635660862	FALSE
1209	PF3D7_0908200.iso1.exon2.amp1_4259	-0.942815651	-1.065504798	0.727921535	-0.122689147	0.078495571	0.635660862	FALSE
1210	PF3D7_0908300.iso2.exon2.amp1_3507	-0.254472727	-0.390686622	0.298056643	-0.136213894	0.427074644	0.640696288	FALSE
1211	PF3D7_0908400.2o2_5815	-0.49344348	-0.702272352	0.388587548	-0.208828872	0.30808609	0.635660862	FALSE
1212	PF3D7_0908500.e15s1_7738	-0.093014781	-0.247109945	0.230992179	-0.154095164	0.534397795	0.677439621	FALSE
1213	PF3D7_0908500.e17s1_8622	-0.639076906	-0.665060631	0.064819996	-0.025983725	0.859729744	0.893520655	FALSE
1214	PF3D7_0908500.e4s1_8616	-0.466445726	-0.636005038	0.57159642	-0.169559312	0.149972495	0.635660862	FALSE
1215	PF3D7_0908700.iso1.exon6.amp1_4386	-0.638128548	-0.728163297	0.611027588	-0.090034749	0.127575443	0.635660862	FALSE
1216	PF3D7_0909100.1o1_4745	-0.679777706	-0.719020233	0.353919318	-0.039242527	0.350149757	0.635660862	FALSE
1217	PF3D7_0909500_5686	0.874751213	0.696559649	0.478279546	-0.178191564	0.218191057	0.635660862	FALSE
1218	PF3D7_0909600.3o3_8193	-0.452840429	-0.527727805	0.122479482	-0.074887376	0.739203599	0.810036281	FALSE
1219	PF3D7_0909700.iso1.exon1.amp1_1703	0.946567278	0.790260416	0.204645695	-0.156306862	0.58084568	0.704451248	FALSE
1220	PF3D7_0909900.iso1.exon1.amp1_1689	0.243186081	-0.042038516	0.567428246	-0.285224597	0.152544265	0.635660862	FALSE
1221	PF3D7_0909900.iso1.exon1.amp2_2197	-0.508951866	-0.6563506	0.426315155	-0.147398735	0.267065256	0.635660862	FALSE
1222	PF3D7_0910000.iso1.exon1.amp2_1355	-0.40566364	-0.465962299	0.438863902	-0.060298659	0.254477212	0.635660862	FALSE
1223	PF3D7_0910200.iso1.exon1.amp1_1395	-0.310679552	-0.286380248	0.137088104	0.024299304	0.709726538	0.788147807	FALSE
1224	PF3D7_0910400.iso1.exon1.amp2_seg1_2878	-0.533821766	-0.684293984	0.303426086	-0.150472217	0.419184654	0.639515524	FALSE
1225	PF3D7_0910400.iso1.exon1.amp2_seg2_864	-0.246305544	-0.348889912	0.840903122	-0.102584368	0.048994845	0.635660862	FALSE
1226	PF3D7_0910900.iso1.exon2.amp1_3342	-0.161203844	-0.352402643	0.986781989	-0.191198798	0.026868078	0.635660862	FALSE
1227	PF3D7_0911100.e1s1_9127	-0.780969086	-0.838362336	0.151732948	-0.057393249	0.680701904	0.767790355	FALSE
1228	PF3D7_0911300.e1s2_8013	-0.129590817	-0.416324686	0.376007585	-0.286733869	0.322856302	0.635660862	FALSE
1229	PF3D7_0911900.2o2_4716	1.170685387	0.957681085	0.641923736	-0.213004302	0.112284371	0.635660862	FALSE
1230	PF3D7_0911900.e2_7125	-0.018994933	-0.17084044	0.819056451	-0.151845507	0.05365924	0.635660862	FALSE
1231	PF3D7_0912500.2o7_6421	0.000372186	-0.064479447	0.149589893	-0.064851633	0.684914681	0.770666438	FALSE
1232	PF3D7_0912600.iso1.exon1.amp1_741	-0.726350494	-0.797198494	0.475004684	-0.070848	0.221023952	0.635660862	FALSE
1233	PF3D7_0912600.iso1.exon2.amp1_4466	-1.15610618	-1.358456094	0.573605818	-0.202349914	0.148747181	0.635660862	FALSE
1234	PF3D7_0912800.1o1_8778	-0.298255551	-0.401982017	0.277900508	-0.103726466	0.45763224	0.644181533	FALSE
1235	PF3D7_0912900.e2s1_6018	-0.448614325	-0.569582688	0.356342405	-0.120968363	0.347070212	0.635660862	FALSE
1236	PF3D7_0913500.3o3_7012	-0.164640672	-0.240646329	0.344960965	-0.076005658	0.36171939	0.635660862	FALSE
1237	PF3D7_0914000.1o1_7665	-0.742162378	-0.913733784	0.306714031	-0.171571406	0.414405404	0.638828732	FALSE
1238	PF3D7_0914100.iso1.exon1.amp1_2279	-0.506733876	-0.636735651	0.923127038	-0.130001775	0.034862705	0.635660862	FALSE
1239	PF3D7_0914200.3o4_7023	-0.432457489	-0.497130328	0.142481091	-0.064672839	0.698974631	0.78053559	FALSE
1240	PF3D7_0914800.1o1_6098	-0.638822935	-0.887788063	0.36055304	-0.248965128	0.341769144	0.635660862	FALSE
1241	PF3D7_0915300.iso1.exon1.amp1_149	-0.609688046	-0.652405097	0.239389359	-0.042717052	0.520086867	0.671935065	FALSE
1242	PF3D7_0915400.e1s1_6348	0.581188156	0.353460001	0.534268827	-0.227728155	0.174505492	0.635660862	FALSE
1243	PF3D7_0916200.iso1.exon1.amp1_2352	-0.289940892	-0.519404429	0.500036184	-0.229463537	0.200171238	0.635660862	FALSE
1244	PF3D7_0916200.iso1.exon2.amp1_2241	-0.449095567	-0.584977185	0.744133444	-0.135881618	0.073357359	0.635660862	FALSE
1245	PF3D7_0916200.iso1.exon2.amp2_1904	-0.567446334	-0.653674036	0.349138787	-0.086227702	0.356287611	0.635660862	FALSE
1246	PF3D7_0916700.e1s1_6618	-0.473803299	-0.671763266	0.40952346	-0.197959967	0.284725218	0.635660862	FALSE
1247	PF3D7_0916800.iso1.exon1.amp1_3204	-0.108630924	-0.384706699	0.46055258	-0.276075775	0.233913527	0.635660862	FALSE
1248	PF3D7_0917000.iso1.exon1.amp2_1923	-0.650483985	-0.719124658	0.191656641	-0.068640673	0.604577679	0.717712029	FALSE
1249	PF3D7_0917200.2o2_4677	-0.418481243	-0.666310595	0.400825705	-0.247829352	0.294247282	0.635660862	FALSE
1250	PF3D7_0917300.1o1_6428	-0.590211575	-0.772380152	0.279126498	-0.182168577	0.455731345	0.644181533	FALSE
1251	PF3D7_0917500.e1s1_7508	-0.556552867	-0.654194482	0.360093316	-0.097641615	0.342344823	0.635660862	FALSE
1252	PF3D7_0917900.e2_8279	-0.16498705	-0.308883242	0.310315419	-0.143896192	0.409216011	0.638828732	FALSE
1253	PF3D7_0918000.e1s1_8347	-0.328350435	-0.587655356	0.41698252	-0.259304921	0.276763822	0.635660862	FALSE
1254	PF3D7_0918300.e2s1_6599	1.132532133	1.147392456	0.045626747	0.014860323	0.900946321	0.923675862	FALSE
1255	PF3D7_0918900.e1s1_7198	-0.100829128	-0.268515597	0.441398775	-0.167686469	0.251996556	0.635660862	FALSE
1256	PF3D7_0918900.e1s2_7481	-0.211398412	-0.51238303	0.497118655	-0.300984617	0.202508243	0.635660862	FALSE
1257	PF3D7_0919200.iso1.exon1.amp1_389	-0.577526014	-0.70530761	0.543710084	-0.127781596	0.167973567	0.635660862	FALSE
1258	PF3D7_0919400.e1s1_4873	-0.37755028	-0.550019318	0.35853774	-0.172469037	0.344298391	0.635660862	FALSE
1259	PF3D7_0919800.iso1.exon1.amp1_3111	-0.482646565	-0.6287192	0.315128024	-0.146072635	0.402355548	0.638828732	FALSE
1260	PF3D7_0919800.iso1.exon1.amp2_seg1_1133	-0.331752523	-0.471123078	0.261513974	-0.139370555	0.483560617	0.65565006	FALSE
1261	PF3D7_0919900.iso1.exon1.amp1_1105	-0.632782932	-0.751270561	0.29047914	-0.118487629	0.438388673	0.643875771	FALSE
1262	PF3D7_0919900.iso1.exon1.amp4_1035	-0.284893124	-0.389778453	0.555331085	-0.104885329	0.160242098	0.635660862	FALSE
1263	PF3D7_0920300.1o4_5819	-0.257285481	-0.3153258	0.146644631	-0.058040319	0.690724065	0.774716111	FALSE
1264	PF3D7_0920400.s1_5698	-0.669418384	-0.840866329	0.297217006	-0.171447945	0.428317969	0.640876713	FALSE
1265	PF3D7_0920800.e1s1_4875	-0.37393387	-0.490042381	0.349207936	-0.116108511	0.35619824	0.635660862	FALSE
1266	PF3D7_0920900.iso1.exon2.amp1_3864	-0.223930424	-0.416809249	0.506351793	-0.192878825	0.19519468	0.635660862	FALSE
1267	PF3D7_0921200.2o6_8242	-0.426548063	-0.551148455	0.337546941	-0.124600392	0.371514807	0.635660862	FALSE
1268	PF3D7_0921400.e1_5664	-0.62145429	-0.85656156	0.308786339	-0.23510727	0.41141352	0.638828732	FALSE
1269	PF3D7_0921800.1o3_8466	-0.910985684	-0.86361003	0.236757636	0.047375654	0.52454582	0.674955439	FALSE
1270	PF3D7_0922100.e1s2_8955	-1.491344668	-1.680182099	0.304350293	-0.188837431	0.417837254	0.638830786	FALSE
1271	PF3D7_0922200.e1s1_7191	-0.558461207	-0.703970672	0.389703567	-0.145509465	0.306802562	0.635660862	FALSE
1272	PF3D7_0922500_7709	-0.982383092	-0.672169208	0.244504838	0.310213884	0.511488533	0.668845721	FALSE
1273	PF3D7_0922800.iso1.exon4.amp3_229	-0.184251837	-0.336960934	0.208570288	-0.152709096	0.573781308	0.700123058	FALSE
1274	PF3D7_0923800.1.e1s1_7487	0.253027082	-0.026463078	0.571293671	-0.27949016	0.150157922	0.635660862	FALSE
1275	PF3D7_0923800.iso2.exon1.amp1_446	0.137223827	-0.145056711	0.582348151	-0.282280538	0.143524252	0.635660862	FALSE
1276	PF3D7_0924000.iso1.exon1.amp1_3692	-0.903107831	-1.129240668	0.748506745	-0.226132837	0.072029632	0.635660862	FALSE
1277	PF3D7_0924000.iso1.exon1.amp2_3981	-0.746985043	-1.057013811	0.415875045	-0.310028768	0.277934029	0.635660862	FALSE
1278	PF3D7_0924000.iso1.exon2.amp1_2373	-0.396098642	-0.672451336	0.445937413	-0.276352694	0.247606561	0.635660862	FALSE
1279	PF3D7_0924200.iso1.exon1.amp1_2570	-0.439782229	-0.4240502	0.073652233	0.01573203	0.840910871	0.878834917	FALSE
1280	PF3D7_0924600.iso1.exon1.amp1_2177	0.125822186	-0.031996347	0.734291341	-0.157818533	0.076435343	0.635660862	FALSE
1281	PF3D7_0924600.iso1.exon2.amp2_seg1_2289	-0.728694584	-0.75516113	0.148560719	-0.026466546	0.686942105	0.771709	FALSE
1282	PF3D7_0925300.1o1_6180	-0.593558171	-0.814925422	0.430762389	-0.22136725	0.262545155	0.635660862	FALSE
1283	PF3D7_0925800.e1s1_9121	-0.613252133	-0.809614357	0.77311049	-0.196362224	0.064995914	0.635660862	FALSE
1284	PF3D7_0925900.e2s1_8042	-0.52572427	-0.755443578	0.424396092	-0.229719308	0.269035915	0.635660862	FALSE
1285	PF3D7_0926200.iso1.exon1.amp1_3505	-0.147098827	-0.30906075	0.40094436	-0.161961924	0.29411564	0.635660862	FALSE
1286	PF3D7_0926500.iso1.exon1.amp2_2495	-0.574993777	-0.624155602	0.273538818	-0.049161825	0.464439173	0.647810461	FALSE
1287	PF3D7_0927300.e1s1_7797	-0.675362043	-0.721031036	0.106782163	-0.045668993	0.771408606	0.835034061	FALSE
1288	PF3D7_0927700.1o1_7283	-0.550707964	-0.832172121	0.4111036	-0.281464157	0.283022973	0.635660862	FALSE
1289	PF3D7_0927800.2o2_4680	-0.702388654	-0.71101615	0.02164214	-0.008627496	0.952900483	0.964596734	FALSE
1290	PF3D7_0927900.1o1_4984	-0.527034201	-0.705890234	0.281609829	-0.178856033	0.451897661	0.644181533	FALSE
1291	PF3D7_0928600.1o1_6100	-0.708310135	-0.823671911	0.184507987	-0.115361776	0.617863743	0.72732575	FALSE
1292	PF3D7_0928700.iso1.exon1.amp1_3151	-0.603386913	-0.716680664	0.56695667	-0.11329375	0.152837799	0.635660862	FALSE
1293	PF3D7_0929000.2o2_8472	0.232092064	-0.023905651	0.499923101	-0.255997715	0.200261369	0.635660862	FALSE
1294	PF3D7_0929000.e2_5102	0.018793174	-0.264093084	0.506287134	-0.282886258	0.195245063	0.635660862	FALSE
1295	PF3D7_0929600.2o2_4963	-1.033151626	-1.105985491	0.210958769	-0.072833865	0.569506513	0.697629852	FALSE
1296	PF3D7_0929800.iso1.exon1.amp1_4123	-0.107369199	-0.33984039	0.630254504	-0.232471191	0.117841164	0.635660862	FALSE
1297	PF3D7_0929900.iso1.exon1.amp1_1496	-0.393161699	-0.457337949	0.398956017	-0.06417625	0.296327998	0.635660862	FALSE
1298	PF3D7_0930100.iso1.exon1.amp2_192	-0.789531986	-0.814102891	0.306236914	-0.024570905	0.415096468	0.638828732	FALSE
1299	PF3D7_0930200.iso1.exon4.amp1_2997	-0.077453585	-0.280087885	0.595523679	-0.202634301	0.135976825	0.635660862	FALSE
1300	PF3D7_0930300.s1_9167	0.397924917	0.256056584	0.323150949	-0.141868333	0.39110743	0.636855536	FALSE
1301	PF3D7_0930300.s2_8884	1.557211093	1.392818622	0.414505067	-0.164392472	0.279387313	0.635660862	FALSE
1302	PF3D7_0930600.iso1.exon5.amp1_2100	-0.54255565	-0.64065495	0.616328157	-0.0980993	0.124817887	0.635660862	FALSE
1303	PF3D7_0930700.iso1.exon1.amp1_702	-0.3789881	-0.459768209	0.413153848	-0.080780109	0.280826888	0.635660862	FALSE
1304	PF3D7_0930700.iso1.exon2.amp1_2944	-0.415296028	-0.618221896	0.398937304	-0.202925868	0.296348884	0.635660862	FALSE
1305	PF3D7_0931300.1o1_6427	-0.655194307	-0.755256572	0.318301607	-0.100062265	0.397877997	0.63867593	FALSE
1306	PF3D7_0931300_6263	-0.839387388	-1.00095652	0.621382291	-0.161569132	0.122241485	0.635660862	FALSE
1307	PF3D7_0931400.3o4_4980	-0.019491979	-0.177233941	0.328899154	-0.157741961	0.383193407	0.635660862	FALSE
1308	PF3D7_0931600.iso1.exon2.amp1_2996	-0.777235361	-0.906243613	0.342174599	-0.129008252	0.365377289	0.635660862	FALSE
1309	PF3D7_0931700.2o3_7353	-0.456857519	-0.566417314	0.520571238	-0.109559795	0.184394654	0.635660862	FALSE
1310	PF3D7_0931800.e1s1_7757	-0.523223346	-0.766031791	0.440888217	-0.242808445	0.252494528	0.635660862	FALSE
1311	PF3D7_0932100.2o5_9117	0.07014467	-0.017494647	0.268013855	-0.087639317	0.473160192	0.650316423	FALSE
1312	PF3D7_0932300.e1s1_4887	-0.255707605	-0.239867515	0.026321704	0.01584009	0.942735973	0.956033154	FALSE
1313	PF3D7_0932700.iso1.exon1.amp2_4526	0.44910699	0.431905077	0.041589052	-0.017201913	0.909663695	0.930088833	FALSE
1314	PF3D7_0933100.4o4_8227	-0.772350213	-0.812726223	0.218697202	-0.040376009	0.555785594	0.688957916	FALSE
1315	PF3D7_0933500.s1_5707	-0.415830172	-0.492886828	0.283487564	-0.077056656	0.449013753	0.644181533	FALSE
1316	PF3D7_0933600.e1s1_8054	-0.180046774	-0.243812573	0.349298002	-0.0637658	0.356081859	0.635660862	FALSE
1317	PF3D7_0933900.4o4_5828	-0.231712411	-0.417521473	0.757515704	-0.185809062	0.069369737	0.635660862	FALSE
1318	PF3D7_0934300.1o1_7830	-0.525839103	-0.657528797	0.380926259	-0.131689693	0.31701497	0.635660862	FALSE
1319	PF3D7_0935600.1o2_7901	0.380622075	0.098735162	0.325695852	-0.281886913	0.387588738	0.635660862	FALSE
1320	PF3D7_0935800.e1_5085	-0.661621088	-0.828633561	0.408263121	-0.167012474	0.286089021	0.635660862	FALSE
1321	PF3D7_0935800.e2_5959	-0.321102117	-0.36159866	0.141921818	-0.040496543	0.700086262	0.781154747	FALSE
1322	PF3D7_0935800.e9_9148	0.701596752	0.435448915	0.3421523	-0.266147838	0.365406677	0.635660862	FALSE
1323	PF3D7_0935900.e1s1_8599	0.161293486	0.116554046	0.044705864	-0.04473944	0.902933262	0.925036488	FALSE
1324	PF3D7_0935900.e2s1_9232	1.464140856	1.143846582	0.501604514	-0.320294274	0.198924949	0.635660862	FALSE
1325	PF3D7_0936200.2o2_4952	-0.436522295	-0.557780116	0.223312564	-0.121257821	0.547697067	0.682842212	FALSE
1326	PF3D7_0936300.2o2_8152	1.578849924	1.463447561	0.311350478	-0.115402363	0.407733348	0.638828732	FALSE
1327	PF3D7_0936400.2o2_8989	-0.277762874	-0.43989331	0.42547133	-0.162130436	0.267930267	0.635660862	FALSE
1328	PF3D7_0936500.iso1.exon1.amp1_973	-0.691837785	-0.773724294	0.357490274	-0.081886509	0.345618754	0.635660862	FALSE
1329	PF3D7_0936600.2o2_6426	-0.563822453	-0.664576422	0.318233234	-0.100753969	0.397974074	0.63867593	FALSE
1330	PF3D7_0936700.1o1_7018	-0.38327766	-0.587753783	0.412917581	-0.204476123	0.281079238	0.635660862	FALSE
1331	PF3D7_0936800.e2s1_5455	0.732967744	0.510401187	0.411480922	-0.222566557	0.282617745	0.635660862	FALSE
1332	PF3D7_0937000.2o2_6410	-0.833887495	-0.916845362	0.144220502	-0.082957867	0.695522385	0.778540826	FALSE
1333	PF3D7_0937200.1o1_7291	-0.021035986	-0.360191653	0.442274713	-0.339155667	0.251144162	0.635660862	FALSE
1334	PF3D7_0937300.iso1.exon2.amp1_3309	-0.264542984	-0.570889794	0.767674302	-0.30634681	0.066488229	0.635660862	FALSE
1335	PF3D7_0937400.iso1.exon2.amp1_1296	0.058017786	-0.291160381	0.547038045	-0.349178167	0.165725099	0.635660862	FALSE
1336	PF3D7_0937500.iso1.exon1.amp1_4176	-0.32537998	-0.529632077	0.615131093	-0.204252097	0.125435641	0.635660862	FALSE
1337	PF3D7_0937600.iso1.exon1.amp1_2479	-0.487518324	-0.525357017	0.148965138	-0.037838693	0.686145089	0.771122577	FALSE
1338	PF3D7_0937600.iso1.exon2.amp1_3322	1.155136858	1.153472185	0.003501269	-0.001664672	0.992374937	0.993437816	FALSE
1339	PF3D7_0937700.iso1.exon2.amp1_713	0.990537542	0.71454358	0.431463829	-0.275993962	0.261838156	0.635660862	FALSE
1340	PF3D7_0937800.iso1.exon1.amp1_2169	-0.533888061	-0.652648653	0.604715743	-0.118760592	0.130934621	0.635660862	FALSE
1341	PF3D7_0937800.iso1.exon2.amp1_1654	-0.281763235	-0.397935496	0.485788003	-0.116172261	0.211816248	0.635660862	FALSE
1342	PF3D7_1000100.iso1.exon2.amp1_3908	1.389596557	1.213654054	0.509621543	-0.175942503	0.192662016	0.635660862	FALSE
1343	PF3D7_1000200.iso1.exon1.amp1_1575	1.824102584	1.710677672	0.574095646	-0.113424912	0.148449907	0.635660862	FALSE
1344	PF3D7_1000300.iso1.exon1.amp1_3601	-0.169464006	-0.3941656	0.459805598	-0.224701593	0.234597165	0.635660862	FALSE
1345	PF3D7_1000400.iso1.exon1.amp1_1864	0.583574245	0.346607922	0.629488774	-0.236966323	0.118214881	0.635660862	FALSE
1346	PF3D7_1000500.iso1.exon3.amp1_4465	0.869630859	0.555992656	0.439019764	-0.313638203	0.254324086	0.635660862	FALSE
1347	PF3D7_1001300.2o2_6130	0.112553967	0.086421179	0.045966991	-0.026132788	0.900212387	0.923260985	FALSE
1348	PF3D7_1001500.1o1_6967	1.319601285	1.268510857	0.096464247	-0.051090428	0.792848346	0.844983779	FALSE
1349	PF3D7_1001600.2o2_4757	0.461972031	0.296868656	0.995588515	-0.165103376	0.025923534	0.635660862	FALSE
1350	PF3D7_1001700.2o2_9009	-2.068201963	-2.144667518	0.250924507	-0.076465555	0.500827665	0.662415459	FALSE
1351	PF3D7_1001900.2o2_7282	0.039500022	-0.221538118	0.449811179	-0.26103814	0.243911647	0.635660862	FALSE
1352	PF3D7_1002100.2o2_7048	2.422794186	2.380759595	0.104295235	-0.042034591	0.776557504	0.837809635	FALSE
1353	PF3D7_1002500.1o3_8986	0.01544761	-0.206063197	0.249984339	-0.221510808	0.502379899	0.663351418	FALSE
1354	PF3D7_1002800.e1s2_6354	-0.009006579	-0.182609012	1.063642306	-0.173602434	0.019705686	0.635660862	FALSE
1355	PF3D7_1003100.iso1.exon3.amp1_38	-0.701556177	-0.84217678	0.249207716	-0.140620604	0.503664468	0.663351418	FALSE
1356	PF3D7_1003400.iso1.exon1.amp3_seg2_2299	-0.167287979	-0.33487739	0.474685242	-0.167589411	0.221302003	0.635660862	FALSE
1357	PF3D7_1003600.e1s1_8919	-0.676099315	-0.707766891	0.206461166	-0.031667576	0.577571578	0.702244096	FALSE
1358	PF3D7_1003800.e1s2_7780	0.764514855	0.702491067	0.124828284	-0.062023788	0.734430753	0.806005413	FALSE
1359	PF3D7_1004200.e2s2_6055	-0.938171026	-1.022109469	0.338927557	-0.083938444	0.369675578	0.635660862	FALSE
1360	PF3D7_1004300.iso1.exon1.amp2_2505	-0.738685033	-0.637584771	0.201153545	0.101100263	0.587173428	0.708448491	FALSE
1361	PF3D7_1004800.2o3_6717	-0.071095505	-0.298429009	0.304490825	-0.227333504	0.417632647	0.638830786	FALSE
1362	PF3D7_1005000.1o1_7075	-0.059301176	-0.14612936	0.212190754	-0.086828185	0.567308864	0.6961637	FALSE
1363	PF3D7_1005300.2o2_8452	-0.590317624	-0.795235064	0.598659873	-0.20491744	0.134236223	0.635660862	FALSE
1364	PF3D7_1005500.e2s1_9236	-0.638636614	-0.726427039	0.244745529	-0.087790425	0.511086218	0.66872877	FALSE
1365	PF3D7_1005700.iso1.exon2.amp1_3583	-0.367297672	-0.472915118	0.490074385	-0.105617446	0.208251316	0.635660862	FALSE
1366	PF3D7_1006000.iso1.exon2.amp1_1866	-0.157167175	-0.268298489	0.482124337	-0.111131314	0.214905942	0.635660862	FALSE
1367	PF3D7_1006500.1o1_7278	0.150406752	0.029315767	0.381025038	-0.121090985	0.316898537	0.635660862	FALSE
1368	PF3D7_1007000.iso1.exon8.amp1_631	-0.634023015	-0.685419857	0.416388517	-0.051396842	0.27739096	0.635660862	FALSE
1369	PF3D7_1007300.iso1.exon1.amp1_3315	-0.309410953	-0.48196309	0.859808207	-0.172552137	0.045293752	0.635660862	FALSE
1370	PF3D7_1007700.e1s1_6640	0.100724742	-0.172207286	0.35562453	-0.272932028	0.347980366	0.635660862	FALSE
1371	PF3D7_1007700.e1s2_8091	1.849184865	1.683853609	0.276318578	-0.165331256	0.460093069	0.644181533	FALSE
1372	PF3D7_1007800.iso1.exon1.amp1_1414	-0.717433749	-0.78464014	0.094627086	-0.06720639	0.796686678	0.847461853	FALSE
1373	PF3D7_1008000.s2_8597	-0.095031617	-0.273513358	0.428894694	-0.178481741	0.264435525	0.635660862	FALSE
1374	PF3D7_1008100.s1_7726	0.25726463	0.147415639	0.25657741	-0.109848991	0.491560533	0.660747911	FALSE
1375	PF3D7_1008100.s3_5986	-0.282644265	-0.409757735	0.305705756	-0.12711347	0.415866788	0.638828732	FALSE
1376	PF3D7_1008200.iso1.exon1.amp1_2743	-0.465924201	-0.527799278	0.104002948	-0.061875078	0.777163448	0.838140888	FALSE
1377	PF3D7_1008400.e1s1_5157	-0.66825999	-0.824224335	0.498582851	-0.155964346	0.201332365	0.635660862	FALSE
1378	PF3D7_1008600.1o1_6726	-0.567858551	-0.657311296	0.16822929	-0.089452745	0.648690959	0.746371276	FALSE
1379	PF3D7_1008700.e3s1_6589	-0.691824287	-0.782726425	0.322206898	-0.090902138	0.392418744	0.637509941	FALSE
1380	PF3D7_1008800.e1s1_8915	-0.756217254	-0.870707203	0.312825859	-0.114489949	0.405626735	0.638828732	FALSE
1381	PF3D7_1009000.1o1_8727	0.060198328	-0.011794158	0.251523262	-0.071992485	0.499840735	0.662415459	FALSE
1382	PF3D7_1009300.iso1.exon1.amp1_1604	-0.392907075	-0.462175138	0.27808555	-0.069268063	0.457344984	0.644181533	FALSE
1383	PF3D7_1009500.e3_5958	-0.679012164	-0.72835017	0.251130568	-0.049338006	0.500487872	0.662415459	FALSE
1384	PF3D7_1009600.iso1.exon3.amp1_2459	-0.6191564	-0.749320452	0.281169847	-0.130164052	0.452575259	0.644181533	FALSE
1385	PF3D7_1010200.iso1.exon1.amp2_1917	-0.335158555	-0.380089088	0.238236377	-0.044930534	0.522037422	0.673627672	FALSE
1386	PF3D7_1010900.iso1.exon2.amp1_108	-0.557416541	-0.638214487	0.270987776	-0.080797946	0.468452252	0.648960613	FALSE
1387	PF3D7_1011300.1o1_5319	-1.11036916	-1.151536236	0.134891807	-0.041167076	0.714125839	0.790216595	FALSE
1388	PF3D7_1011400.1o1_6697	-0.802616282	-0.941928367	0.234160087	-0.139312085	0.528970344	0.676657319	FALSE
1389	PF3D7_1011500.1o1_7558	-0.75670571	-0.823793355	0.261373266	-0.067087644	0.483787437	0.65565006	FALSE
1390	PF3D7_1011700 (renamed)_6433	-0.152716759	-0.254441686	0.177515178	-0.101724927	0.631010266	0.735086326	FALSE
1391	PF3D7_1011800.e1s2_7200	0.151213517	0.104543508	0.222299069	-0.04667001	0.549467112	0.683381346	FALSE
1392	PF3D7_1011900.iso1.exon4.amp1_2357	-0.456446839	-0.77026132	0.407626573	-0.313814481	0.286779878	0.635660862	FALSE
1393	PF3D7_1012000.iso1.exon1.amp1_2737	-0.687204903	-0.750582286	0.154203701	-0.063377382	0.675860078	0.765701681	FALSE
1394	PF3D7_1012000.iso1.exon9.amp1_3295	-0.624169283	-0.674637949	0.343372011	-0.050468666	0.363801889	0.635660862	FALSE
1395	PF3D7_1012100.iso1.exon1.amp1_2444	-0.563712608	-0.583872583	0.102656801	-0.020159975	0.779956307	0.839216226	FALSE
1396	PF3D7_1012200.1o2_8148	0.448985561	0.273685823	0.439493116	-0.175299737	0.253859523	0.635660862	FALSE
1397	PF3D7_1012400.e3s1_5724	-0.279585256	-0.466905327	0.273863614	-0.187320071	0.463929918	0.647810461	FALSE
1398	PF3D7_1012500.e1s1_9230	-0.595764421	-0.880951227	0.370834982	-0.285186805	0.329091603	0.635660862	FALSE
1399	PF3D7_1012600.e1s1_9222	-0.932144074	-1.103029009	0.352063996	-0.170884935	0.352522045	0.635660862	FALSE
1400	PF3D7_1012700.e1s1_7980	0.876000071	0.668100643	0.533874665	-0.207899427	0.174783177	0.635660862	FALSE
1401	PF3D7_1012700.e1s2_6240	-0.454401914	-0.573662074	0.490390952	-0.11926016	0.207990152	0.635660862	FALSE
1402	PF3D7_1013100.1o2_5076	-1.018968336	-1.067654234	0.197615342	-0.048685897	0.593624357	0.711942985	FALSE
1403	PF3D7_1013100.2o2_4787	-0.398345857	-0.484325072	0.294138098	-0.085979215	0.432899249	0.641615803	FALSE
1404	PF3D7_1013200.iso1.exon1.amp1_4310	-0.665419632	-0.699509506	0.140106784	-0.034089874	0.703699311	0.783005107	FALSE
1405	PF3D7_1013200.iso1.exon1.amp2_2506	-0.555261556	-0.55662375	0.007734793	-0.001362194	0.983156391	0.987566185	FALSE
1406	PF3D7_1013400.iso1.exon9.amp1_3307	-0.626714667	-0.842702284	0.641354976	-0.215987617	0.112549267	0.635660862	FALSE
1407	PF3D7_1013700.iso1.exon1.amp1_3828	-0.526898875	-0.653620658	0.323538151	-0.126721782	0.390570538	0.636855536	FALSE
1408	PF3D7_1013900.iso1.exon1.amp2_seg2_4622	-0.283298403	-0.534380877	0.701270174	-0.251082474	0.087729067	0.635660862	FALSE
1409	PF3D7_1014000.iso1.exon6.amp1_1249	-0.153923971	-0.290813137	0.404086244	-0.136889166	0.290647449	0.635660862	FALSE
1410	PF3D7_1014000.iso1.exon7.amp1_955	-0.656951169	-0.961894203	0.52698077	-0.304943034	0.179705486	0.635660862	FALSE
1411	PF3D7_1014100.s1_5371	0.992493806	0.838643464	0.225315847	-0.153850341	0.544208569	0.68153677	FALSE
1412	PF3D7_1014100.s2_5660	0.336227886	0.32767293	0.013007039	-0.008554956	0.971680044	0.978660504	FALSE
1413	PF3D7_1014300.e1s3_6628	-0.436154543	-0.475193839	0.215041058	-0.039039296	0.562243566	0.694201215	FALSE
1414	PF3D7_1014500.iso1.exon1.amp2_3369	-0.52528617	-0.58621913	0.213991447	-0.06093296	0.56410572	0.694657009	FALSE
1415	PF3D7_1014600 (renamed, has duplicates)_5653	-0.578433435	-0.638712664	0.172089894	-0.06027923	0.641309774	0.741023487	FALSE
1416	PF3D7_1014600.e1s2_7100	-0.187814597	-0.384515581	0.875466156	-0.196700985	0.042446184	0.635660862	FALSE
1417	PF3D7_1014600.e1s3_8257	0.163972158	-0.040161197	0.589111528	-0.204133356	0.139602056	0.635660862	FALSE
1418	PF3D7_1014800.6o11_8787	-0.267555475	-0.391699087	0.406857667	-0.124143612	0.287616223	0.635660862	FALSE
1419	PF3D7_1014800.7o11_8498	0.10779736	-0.216265711	0.599872384	-0.324063071	0.133568933	0.635660862	FALSE
1420	PF3D7_1014900.iso1.exon1.amp1_3710	-0.388452795	-0.406944563	0.095513126	-0.018491768	0.794834736	0.846040016	FALSE
1421	PF3D7_1015100.1o1_9044	-0.602126263	-0.562572105	0.124917447	0.039554159	0.734249816	0.806005413	FALSE
1422	PF3D7_1015200.iso1.exon3.amp1_1792	-0.449852187	-0.5713675	0.255134472	-0.121515313	0.493915258	0.661068441	FALSE
1423	PF3D7_1015500.1o1_8772	-0.605466858	-0.787205395	0.950867297	-0.181738537	0.031110109	0.635660862	FALSE
1424	PF3D7_1015900.e2s1_5752	0.92869062	0.562611417	0.473185429	-0.366079203	0.222611589	0.635660862	FALSE
1425	PF3D7_1016000.iso1.exon1.amp1_1018	-0.763138361	-0.869182426	0.485212909	-0.106044065	0.212298633	0.635660862	FALSE
1426	PF3D7_1016200.1o1_8491	0.460477661	0.295355003	0.740688971	-0.165122658	0.074420263	0.635660862	FALSE
1427	PF3D7_1016300.e1s1_5130	-0.733053451	-0.835691655	0.268180596	-0.102638204	0.472895387	0.650316423	FALSE
1428	PF3D7_1016500.e1s1_7472	-0.281228129	-0.469419283	0.538504594	-0.188191154	0.171546751	0.635660862	FALSE
1429	PF3D7_1016500.e2s1_8376	-0.583215062	-0.657547743	0.386373778	-0.07433268	0.310645007	0.635660862	FALSE
1430	PF3D7_1016700.iso1.exon2.amp1_3820	-0.470000181	-0.690214109	0.40312597	-0.220213928	0.291703865	0.635660862	FALSE
1431	PF3D7_1016900.e1s1_4855	-0.342435974	-0.541744587	0.678777939	-0.199308613	0.096347633	0.635660862	FALSE
1432	PF3D7_1017000.e1s1_7482	-0.38256839	-0.57104878	0.457241647	-0.18848039	0.236956879	0.635660862	FALSE
1433	PF3D7_1017000.e1s2_7193	-0.253210191	-0.357678743	0.366065016	-0.104468553	0.334925925	0.635660862	FALSE
1434	PF3D7_1017100.1o1_6988	0.25744091	0.126180056	0.406972783	-0.131260854	0.287490881	0.635660862	FALSE
1435	PF3D7_1017300.1.2o2_6764	-0.392083856	-0.414986561	0.125645036	-0.022902705	0.732774016	0.805132579	FALSE
1436	PF3D7_1017800.iso1.exon3.amp1_1681	0.069231843	-0.066686375	0.579549346	-0.135918217	0.145177369	0.635660862	FALSE
1437	PF3D7_1017800.iso1.exon3.amp2_1970	-0.307080054	-0.592244475	0.706650394	-0.285164421	0.085782479	0.635660862	FALSE
1438	PF3D7_1017900.e2s1_5746	-0.156477035	-0.37828052	0.325333217	-0.221803484	0.388088685	0.635660862	FALSE
1439	PF3D7_1018000.1o1_8202	-0.934475361	-0.909655318	0.0978803	0.024820043	0.789894014	0.844983779	FALSE
1440	PF3D7_1018100.1o1_6997	-0.766962899	-0.782263305	0.122252549	-0.015300407	0.739665392	0.810036281	FALSE
1441	PF3D7_1018300.e1s1_5945	-0.064763294	-0.212490146	0.407775284	-0.147726852	0.286618355	0.635660862	FALSE
1442	PF3D7_1018300.e2s2_5481	-0.301541838	-0.680486646	0.771479813	-0.378944807	0.06543999	0.635660862	FALSE
1443	PF3D7_1019000.e1s1_6639	-0.165607188	-0.289245429	0.501809461	-0.123638242	0.198762599	0.635660862	FALSE
1444	PF3D7_1019000.e1s2_6350	-0.358095759	-0.453108228	0.474133852	-0.095012469	0.221782671	0.635660862	FALSE
1445	PF3D7_1019300.iso1.exon1.amp2_1043	-0.403541947	-0.563306075	0.389593652	-0.159764128	0.306928782	0.635660862	FALSE
1446	PF3D7_1019400.e2s1_9178	-0.671993207	-0.864555605	0.610673085	-0.192562398	0.127761921	0.635660862	FALSE
1447	PF3D7_1019500.1.6o25_6176	0.264661707	0.0704999	0.583489844	-0.194161806	0.14285499	0.635660862	FALSE
1448	PF3D7_1019500.1.9o25_6465	-0.596637674	-0.861314808	0.396800574	-0.264677135	0.298741666	0.635660862	FALSE
1449	PF3D7_1020200.e2s1_4857	-0.32922086	-0.42355539	0.52906532	-0.09433453	0.178203947	0.635660862	FALSE
1450	PF3D7_1020200.e3s1_5754	-0.539125559	-0.495784261	0.160311912	0.043341298	0.663960841	0.75896706	FALSE
1451	PF3D7_1020300.e1s1_7784	-0.362356017	-0.389409039	0.080757699	-0.027053022	0.825851143	0.867035197	FALSE
1452	PF3D7_1020500.1o1_4727	-0.705559126	-0.751602908	0.274274395	-0.046043783	0.463286392	0.647723991	FALSE
1453	PF3D7_1020700.e1s1_7201	-0.313465023	-0.38721256	0.281417887	-0.073747537	0.452193176	0.644181533	FALSE
1454	PF3D7_1020700.e1s2_8363	-0.403997692	-0.588765988	0.532057586	-0.184768296	0.176068522	0.635660862	FALSE
1455	PF3D7_1020800.11o11_6470	-0.682674513	-0.878046248	0.357468473	-0.195371735	0.345646276	0.635660862	FALSE
1456	PF3D7_1021000.iso1.exon2.amp1_3284	-0.508342656	-0.844448568	0.476307191	-0.336105912	0.219893383	0.635660862	FALSE
1457	PF3D7_1021000.iso1.exon4.amp1_1510	-0.537980022	-0.646633084	0.375514164	-0.108653062	0.323446999	0.635660862	FALSE
1458	PF3D7_1021200.1o1_6485	0.604099252	0.344548353	0.292316031	-0.2595509	0.435626729	0.642555154	FALSE
1459	PF3D7_1021500.iso1.exon1.amp1_154	-0.726010199	-0.826252549	0.408260332	-0.100242351	0.286092045	0.635660862	FALSE
1460	PF3D7_1021600.e1s1_6028	-0.548897506	-0.643032199	0.27158751	-0.094134692	0.46750669	0.648960613	FALSE
1461	PF3D7_1021700.e1s2_6931	0.614991283	0.371783759	0.37973823	-0.243207523	0.318418031	0.635660862	FALSE
1462	PF3D7_1021700.e1s3_8087	-0.883110057	-1.007411471	0.273287144	-0.124301414	0.46483404	0.647810461	FALSE
1463	PF3D7_1021700.e2s2_7510	-0.406615219	-0.542704809	0.435868644	-0.13608959	0.257435179	0.635660862	FALSE
1464	PF3D7_1021700.e3s1_8324	0.279138955	0.064734016	0.345125392	-0.214404938	0.361504414	0.635660862	FALSE
1465	PF3D7_1021800.iso1.exon2.amp1_3703	0.639543052	0.528769544	0.553627266	-0.110773509	0.16135474	0.635660862	FALSE
1466	PF3D7_1021900.e1s2_5472	0.726902813	0.578441163	0.784847442	-0.14846165	0.061887869	0.635660862	FALSE
1467	PF3D7_1021900.e1s3_6056	0.132076729	-0.065766547	0.63436305	-0.197843276	0.115855239	0.635660862	FALSE
1468	PF3D7_1022000.e2_4806	0.412677715	0.147951947	0.572716595	-0.264725767	0.149288265	0.635660862	FALSE
1469	PF3D7_1022200.e2s1_5154	-0.456700325	-0.592620563	0.284938449	-0.135920238	0.446794204	0.644181533	FALSE
1470	PF3D7_1022300.2o6_4974	-0.111123406	-0.338921563	0.348013685	-0.227798157	0.357744182	0.635660862	FALSE
1471	PF3D7_1022700.1o1_7854	0.160276444	0.125446855	0.088312114	-0.03482959	0.809925815	0.856024119	FALSE
1472	PF3D7_1023100.e1s3_6525	-0.965597671	-1.056688414	0.380997903	-0.091090742	0.316930517	0.635660862	FALSE
1473	PF3D7_1023100.e1s4_6236	-0.448972732	-0.680691341	0.541056824	-0.231718608	0.169786218	0.635660862	FALSE
1474	PF3D7_1023100.e1s6_5941	0.250013658	0.109579128	0.191724819	-0.14043453	0.604451725	0.717712029	FALSE
1475	PF3D7_1023200.1o1_6706	-0.279956319	-0.562613274	0.485127121	-0.282656955	0.212370674	0.635660862	FALSE
1476	PF3D7_1023900.s3_8307	-0.021364678	-0.090751233	0.232729079	-0.069386554	0.531417768	0.677439621	FALSE
1477	PF3D7_1024000.iso1.exon1.amp1_1314	-0.089791252	-0.128966534	0.234600432	-0.039175282	0.528218647	0.676561879	FALSE
1478	PF3D7_1024300.1o1_7540	-0.289303966	-0.404907173	0.195060859	-0.115603207	0.598306387	0.714502175	FALSE
1479	PF3D7_1024400.1o2_7617	-0.441190706	-0.637539812	0.336161792	-0.196349106	0.373367057	0.635660862	FALSE
1480	PF3D7_1024800.e2s2_5767	0.665905858	0.525266977	0.246797616	-0.14063888	0.507664395	0.666287493	FALSE
1481	PF3D7_1026500.iso1.exon1.amp1_1214	-0.457800239	-0.619117216	0.598999786	-0.161316978	0.134048839	0.635660862	FALSE
1482	PF3D7_1026900.1o1_7582	-0.78569745	-0.993867141	0.345803895	-0.208169691	0.36061836	0.635660862	FALSE
1483	PF3D7_1027000.iso1.exon1.amp2_seg1_3452	-0.71063834	-0.756231929	0.159927003	-0.04559359	0.664707659	0.759197677	FALSE
1484	PF3D7_1027400.iso1.exon1.amp1_87	-0.316968315	-0.47837589	0.534399583	-0.161407576	0.174413463	0.635660862	FALSE
1485	PF3D7_1028000.iso1.exon2.amp1_1224	-0.41788239	-0.616470574	0.502445612	-0.198588185	0.198259424	0.635660862	FALSE
1486	PF3D7_1028300.e1s1_5740	-0.578775496	-0.749483382	0.300613613	-0.170707887	0.423304203	0.640679519	FALSE
1487	PF3D7_1028700.1o1_8478	1.176853211	0.965672697	0.363396576	-0.211180514	0.338225247	0.635660862	FALSE
1488	PF3D7_1028900.2o2_7542	-0.543876262	-0.579823151	0.102695737	-0.035946889	0.779875477	0.839216226	FALSE
1489	PF3D7_1029400.1o1_7611	-0.71321444	-0.771892648	0.146692768	-0.058678208	0.690628935	0.774716111	FALSE
1490	PF3D7_1029500.1o1_4650	0.126334672	-0.167152509	0.393180872	-0.293487181	0.302831142	0.635660862	FALSE
1491	PF3D7_1030200.1o1_4717	0.364307934	0.109600507	0.443290783	-0.254707427	0.250158491	0.635660862	FALSE
1492	PF3D7_1030400.2o2_6704	-0.54684345	-0.601987582	0.222016327	-0.055144132	0.54996153	0.683381346	FALSE
1493	PF3D7_1030500.1o1_4988	-0.717455465	-0.939939087	0.353117436	-0.222483621	0.351173549	0.635660862	FALSE
1494	PF3D7_1030700.iso1.exon1.amp1_391	-0.360344593	-0.63016691	0.433245771	-0.269822317	0.260049332	0.635660862	FALSE
1495	PF3D7_1030800.1o1_5237	0.375949189	0.222157502	0.266552625	-0.153791687	0.475485091	0.651960975	FALSE
1496	PF3D7_1031500.iso1.exon1.amp1_1891	-0.900776826	-0.932760664	0.141104759	-0.031983838	0.701711696	0.782034815	FALSE
1497	PF3D7_1031500.iso1.exon4.amp1_656	-0.431585649	-0.598860335	0.444386782	-0.167274686	0.24909899	0.635660862	FALSE
1498	PF3D7_1031800.iso1.exon1.amp1_698	-0.11887337	-0.332020572	0.385060671	-0.213147202	0.31217094	0.635660862	FALSE
1499	PF3D7_1032100.iso1.exon1.amp1_3724	-0.445605393	-0.508846081	0.24507481	-0.063240688	0.510536153	0.668633056	FALSE
1500	PF3D7_1032100.iso1.exon1.amp2_4232	-0.074864952	-0.198001383	0.358811828	-0.123136431	0.343953546	0.635660862	FALSE
1501	PF3D7_1032400.3o7_4720	-0.279813329	-0.415591212	0.365059749	-0.135777883	0.33616587	0.635660862	FALSE
1502	PF3D7_1032900.e1s1_8259	-0.266264534	-0.391279399	0.417628532	-0.125014865	0.276083118	0.635660862	FALSE
1503	PF3D7_1033700.e3s1_8911	-0.481355688	-0.627552832	0.315242501	-0.146197144	0.402193393	0.638828732	FALSE
1504	PF3D7_1033800.8o8_9037	-0.310551548	-0.587322507	0.422380669	-0.276770959	0.271118668	0.635660862	FALSE
1505	PF3D7_1034100.iso1.exon2.amp1_2074	-0.196887353	-0.496203218	0.397588101	-0.299315866	0.297857934	0.635660862	FALSE
1506	PF3D7_1034500.iso1.exon2.amp2_seg1_573	-0.537237574	-0.678475559	0.585740612	-0.141237984	0.141544152	0.635660862	FALSE
1507	PF3D7_1034700.1o1_4662	-0.412385944	-0.659919174	0.426734727	-0.24753323	0.266636026	0.635660862	FALSE
1508	PF3D7_1034900.e1s1_8260	-0.363406464	-0.58107876	0.466009175	-0.217672296	0.228971911	0.635660862	FALSE
1509	PF3D7_1035000.1o1_8245	-0.539110805	-0.574772729	0.129548044	-0.035661923	0.724878194	0.799016703	FALSE
1510	PF3D7_1035100.1o1_8208	0.807240128	0.605040712	0.641451537	-0.202199416	0.112504253	0.635660862	FALSE
1511	PF3D7_1035200.1o1_4741	-1.041350869	-1.169829329	0.523579081	-0.12847846	0.18218049	0.635660862	FALSE
1512	PF3D7_1035300.iso1.exon1.amp1_2847	0.259079841	0.120298349	0.372649517	-0.138781492	0.326893459	0.635660862	FALSE
1513	PF3D7_1035300.iso1.exon1.amp2_3364	-0.134893024	-0.322039886	0.949906425	-0.187146862	0.031232788	0.635660862	FALSE
1514	PF3D7_1035600.1o1_6162	-0.704956323	-0.768646866	0.547672142	-0.063690543	0.165299836	0.635660862	FALSE
1515	PF3D7_1035700.e1s1_8948	0.073257004	-0.075840046	0.646097406	-0.149097051	0.110358801	0.635660862	FALSE
1516	PF3D7_1035800.1o1_5041	0.857645476	0.9934742	0.174114634	0.135828725	0.63745587	0.740051583	FALSE
1517	PF3D7_1035900.1o1_5890	1.983855392	1.709953634	0.458999817	-0.273901758	0.235336556	0.635660862	FALSE
1518	PF3D7_1036000.1o1_5293	0.125581133	-0.042344702	0.708482063	-0.167925835	0.085129537	0.635660862	FALSE
1519	PF3D7_1036300.1o1_6786	0.014875705	-0.197600403	0.386295096	-0.212476107	0.310736272	0.635660862	FALSE
1520	PF3D7_1036400.1o2_6117	0.644249377	0.46020712	0.345445096	-0.184042257	0.361086705	0.635660862	FALSE
1521	PF3D7_1036400.e2s2_6540	-0.395216918	-0.526947691	0.623242034	-0.131730773	0.121306295	0.635660862	FALSE
1522	PF3D7_1036500.1o1_6762	0.094265111	-0.044347035	0.301452809	-0.138612146	0.422071964	0.640679519	FALSE
1523	PF3D7_1036600.iso1.exon3.amp1_3273	-1.044908303	-1.280632589	0.404685943	-0.235724286	0.289989308	0.635660862	FALSE
1524	PF3D7_1036600.iso2.exon3.amp1_3851	-0.24581891	-0.522631609	0.421125697	-0.2768127	0.272422387	0.635660862	FALSE
1525	PF3D7_1036900.e1s2_5948	0.687675084	0.457723939	0.420530558	-0.229951144	0.273042477	0.635660862	FALSE
1526	PF3D7_1036900.e2s1_6576	-0.625465821	-0.827472088	0.331537134	-0.202006266	0.37960194	0.635660862	FALSE
1527	PF3D7_1037000.iso1.exon3.amp1_4275	0.609231404	0.387602763	0.773395149	-0.22162864	0.064918705	0.635660862	FALSE
1528	PF3D7_1037000.iso1.exon3.amp2_4564	-0.416229875	-0.638672238	0.847312647	-0.222442363	0.047706529	0.635660862	FALSE
1529	PF3D7_1037100.1o1_9098	-0.177904094	-0.324586343	0.34785964	-0.146682249	0.357943968	0.635660862	FALSE
1530	PF3D7_1037200.10o12_7895	-0.311212966	-0.484478921	0.3213943	-0.173265955	0.393550082	0.637869612	FALSE
1531	PF3D7_1037600.e2s1_7184	0.360713953	0.098094664	0.367227085	-0.262619289	0.333497076	0.635660862	FALSE
1532	PF3D7_1037600.e3s1_6616	-0.547861785	-0.812217961	0.38065696	-0.264356177	0.317332575	0.635660862	FALSE
1533	PF3D7_1038400.e1s1_8544	-0.402366931	-0.635670895	1.84856571	-0.233303964	0.001214397	0.635660862	FALSE
1534	PF3D7_1038400.e3s1_7460	-0.288059401	-0.629892434	0.641059363	-0.341833033	0.112687185	0.635660862	FALSE
1535	PF3D7_1038400.e7s1_7389	0.064867127	-0.114483269	0.839783477	-0.179350396	0.049223519	0.635660862	FALSE
1536	PF3D7_1038500.2o2_4992	-0.589028977	-0.671468472	0.357372993	-0.082439495	0.345766835	0.635660862	FALSE
1537	PF3D7_1038600.2o2_8191	-0.672287389	-0.67667432	0.018373227	-0.004386932	0.960006614	0.969340491	FALSE
1538	PF3D7_1038900.e1s1_9213	-0.949418853	-1.043227616	0.269232165	-0.093808764	0.471227664	0.649617685	FALSE
1539	PF3D7_1039700.iso1.exon1.amp1_1851	0.363846218	0.026797605	1.338662793	-0.337048614	0.006835731	0.635660862	FALSE
1540	PF3D7_1039900.iso1.exon2.amp1_3588	-0.548501522	-0.656893838	0.53291081	-0.108392316	0.175463908	0.635660862	FALSE
1541	PF3D7_1040000.iso1.exon2.amp1_1585	-0.038424281	-0.273864379	0.843401157	-0.235440098	0.048488558	0.635660862	FALSE
1542	PF3D7_1040100.iso1.exon2.amp1_3299	0.872110208	0.634221089	0.421912767	-0.237889119	0.271604132	0.635660862	FALSE
1543	PF3D7_1040200.iso1.exon2.amp1_408	0.496049545	0.25490375	0.635401156	-0.241145795	0.115358562	0.635660862	FALSE
1544	PF3D7_1040300.iso1.exon2.amp1_997	0.356570603	0.10879715	0.456418925	-0.247773453	0.237718405	0.635660862	FALSE
1545	PF3D7_1040400.iso1.exon2.amp1_2156	-0.0695995	-0.351941071	0.518064846	-0.282341571	0.186258263	0.635660862	FALSE
1546	PF3D7_1040500.iso1.exon2.amp1_2735	0.103036927	-0.056141861	0.21263843	-0.159178787	0.566511524	0.695985097	FALSE
1547	PF3D7_1040600.iso1.exon2.amp1_2150	-0.335093332	-0.458129579	0.283415985	-0.123036247	0.449123452	0.644181533	FALSE
1548	PF3D7_1040700.iso1.exon2.amp1_419	0.128512	-0.120791829	0.464850839	-0.24930383	0.230013267	0.635660862	FALSE
1549	PF3D7_1040900.iso1.exon2.amp1_2143	0.194562848	-0.038921901	0.45604354	-0.233484749	0.238066571	0.635660862	FALSE
1550	PF3D7_1041000.iso1.exon2.amp1_1280	0.40392621	0.205389519	0.908947369	-0.198536691	0.036959816	0.635660862	FALSE
1551	PF3D7_1041100.iso1.exon2.amp1_3013	0.602879947	0.370916213	0.439956191	-0.231963734	0.253405744	0.635660862	FALSE
1552	PF3D7_1041200.iso1.exon2.amp1_2153	0.636089265	0.260659171	0.593126366	-0.375430094	0.137321683	0.635660862	FALSE
1553	PF3D7_1041300.iso1.exon1.amp1_1293	0.482564725	0.417863643	0.204165083	-0.064701081	0.58171422	0.704894846	FALSE
1554	PF3D7_1041300.iso1.exon2.amp1_498	-0.230864366	-0.298614413	0.546021608	-0.067750047	0.166408882	0.635660862	FALSE
1555	PF3D7_1041300.iso1.exon2.amp2_787	-0.806163531	-0.878543945	0.486160464	-0.072380414	0.211504348	0.635660862	FALSE
1556	PF3D7_1100100.iso1.exon1.amp1_4545	-0.476344154	-0.536707063	0.230190668	-0.060362909	0.535776442	0.677749668	FALSE
1557	PF3D7_1100100.iso1.exon2.amp1_1582	0.948693625	0.773986006	0.416100321	-0.174707619	0.277695659	0.635660862	FALSE
1558	PF3D7_1100200.e1s1_7391	-0.448695526	-0.618848599	0.555243249	-0.170153073	0.160299284	0.635660862	FALSE
1559	PF3D7_1100200.e1s2_8548	-0.758348205	-0.896962547	0.462395405	-0.138614342	0.23223436	0.635660862	FALSE
1560	PF3D7_1100200.e1s3_7392	-0.480259375	-0.634845618	0.866760017	-0.154586243	0.044005996	0.635660862	FALSE
1561	PF3D7_1100300.iso1.exon2.amp1_4474	0.840514429	0.585980252	0.517063198	-0.254534177	0.187007782	0.635660862	FALSE
1562	PF3D7_1100400.iso1.exon2.amp1_3590	0.288246796	0.107919108	0.44238302	-0.180327688	0.251038938	0.635660862	FALSE
1563	PF3D7_1100500.iso1.exon1.amp1_699	-0.250098778	-0.481853701	0.757954351	-0.231754923	0.069242766	0.635660862	FALSE
1564	PF3D7_1100800.2o2_4959	-0.591974007	-0.664853924	0.298696037	-0.072879917	0.426129566	0.640679519	FALSE
1565	PF3D7_1101100.iso1.exon1.amp1_3897	0.484593572	0.155536348	0.555629491	-0.329057224	0.160047962	0.635660862	FALSE
1566	PF3D7_1101200.iso1.exon1.amp1_3319	0.465899672	0.20437632	0.536546208	-0.261523352	0.172908962	0.635660862	FALSE
1567	PF3D7_1101300.iso1.exon1.amp1_2434	0.394260975	0.155171268	0.475140981	-0.239089707	0.220905409	0.635660862	FALSE
1568	PF3D7_1101500.iso1.exon1.amp1_3877	-0.605335888	-0.781126897	0.750497035	-0.175791009	0.071433356	0.635660862	FALSE
1569	PF3D7_1101700.iso1.exon2.amp1_2140	1.033393024	0.726209	0.95709094	-0.307184023	0.030327601	0.635660862	FALSE
1570	PF3D7_1102200.iso1.exon1.amp1_2170	-0.335679103	-0.580689455	1.721828599	-0.245010352	0.001814117	0.635660862	FALSE
1571	PF3D7_1102400.1o1_6766	-0.46741603	-0.612950277	0.536195811	-0.145534246	0.173153731	0.635660862	FALSE
1572	PF3D7_1102500.e2s1_5459	0.377456844	0.25086957	0.618096259	-0.126587274	0.123910744	0.635660862	FALSE
1573	PF3D7_1102700.iso1.exon1.amp1_375	0.404826782	0.139484019	0.384195133	-0.265342763	0.313180069	0.635660862	FALSE
1574	PF3D7_1102800.iso1.exon1.amp1_671	1.627705786	1.528598909	0.23549564	-0.099106877	0.526692529	0.67621147	FALSE
1575	PF3D7_1103000.iso1.exon1.amp1_1212	-0.602493593	-0.76851434	0.547830681	-0.166020746	0.165193667	0.635660862	FALSE
1576	PF3D7_1103100.e2s1_8572	-0.163873453	-0.385802244	0.308725406	-0.221928791	0.411501266	0.638828732	FALSE
1577	PF3D7_1103500.13o13_6965	-0.424303852	-0.45757879	0.196999242	-0.033274938	0.594751704	0.712685376	FALSE
1578	PF3D7_1103500.1o13_8994	-0.295026753	-0.414610591	0.286823091	-0.119583838	0.443922541	0.644181533	FALSE
1579	PF3D7_1103500.1o2_7831	0.377375283	0.298727476	0.183629942	-0.078647808	0.619506399	0.728036858	FALSE
1580	PF3D7_1103800.e1s1_7393	1.042211884	0.71037624	0.454937877	-0.331835643	0.239094622	0.635660862	FALSE
1581	PF3D7_1104000.1o3_6466	-0.340413944	-0.448060738	0.173496363	-0.107646795	0.638631424	0.740051583	FALSE
1582	PF3D7_1104100.4o4_7289	-0.233564718	-0.401004545	0.468589633	-0.167439827	0.226666813	0.635660862	FALSE
1583	PF3D7_1104200.e1s2_5379	-0.345882805	-0.488402682	0.488881879	-0.142519877	0.209237733	0.635660862	FALSE
1584	PF3D7_1104800.2o9_8185	-0.818946561	-1.029234917	0.41373099	-0.210288356	0.280211253	0.635660862	FALSE
1585	PF3D7_1105200.iso1.exon3.amp1_951	-0.325069011	-0.531262152	0.47483455	-0.206193141	0.221172003	0.635660862	FALSE
1586	PF3D7_1105600.e1s1_6922	-0.425688103	-0.502133264	0.187016218	-0.07644516	0.613184239	0.724214033	FALSE
1587	PF3D7_1105900.iso1.exon1.amp1_1541	-0.656619887	-0.871820634	0.590295346	-0.215200746	0.138925985	0.635660862	FALSE
1588	PF3D7_1106100.iso1.exon4.amp1_381	-0.465110587	-0.468034756	0.058787296	-0.00292417	0.872640902	0.902909627	FALSE
1589	PF3D7_1106300.2o6_8231	-0.022123591	-0.218861442	0.759226915	-0.196737851	0.068875723	0.635660862	FALSE
1590	PF3D7_1106700.iso1.exon1.amp2_772	-0.477438194	-0.464940102	0.078685841	0.012498092	0.830234562	0.870597499	FALSE
1591	PF3D7_1107400.iso1.exon1.amp1_3598	0.017730131	-0.080206733	0.232578064	-0.097936864	0.531676457	0.677439621	FALSE
1592	PF3D7_1107500.iso1.exon5.amp1_2058	0.001222182	-0.227299925	0.429957107	-0.228522107	0.263358809	0.635660862	FALSE
1593	PF3D7_1107600.iso1.exon1.amp1_seg2_2908	-0.231730987	-0.321082038	0.143352321	-0.08935105	0.697244521	0.779534943	FALSE
1594	PF3D7_1107600.iso1.exon1.amp2_3661	-0.65155315	-0.590584127	0.180824328	0.060969023	0.624770771	0.732446382	FALSE
1595	PF3D7_1107800.e2s1_7678	-0.23654329	-0.380094533	0.339985506	-0.143551242	0.368270898	0.635660862	FALSE
1596	PF3D7_1107900.iso1.exon1.amp1_542	-0.502255768	-0.639587561	0.38909265	-0.137331793	0.307504636	0.635660862	FALSE
1597	PF3D7_1108100.iso1.exon1.amp1_2831	-0.561914171	-0.480031007	0.153709441	0.081883164	0.676827353	0.765869208	FALSE
1598	PF3D7_1108600.e1s1_6906	-0.138762147	-0.161936128	0.18387387	-0.023173981	0.619049821	0.727805324	FALSE
1599	PF3D7_1109200.3o4_6218	0.099373394	-0.095601529	0.716469302	-0.194974923	0.082339183	0.635660862	FALSE
1600	PF3D7_1110200.e1s1_4895	-0.331187659	-0.438811922	0.478667613	-0.107624263	0.217857486	0.635660862	FALSE
1601	PF3D7_1110200.e1s2_6629	-0.280106074	-0.437177246	0.329084803	-0.157071172	0.382939824	0.635660862	FALSE
1602	PF3D7_1110200.e2s1_6580	-0.02873122	-0.082961676	0.287804766	-0.054230456	0.442431872	0.644181533	FALSE
1603	PF3D7_1110400.e3s2_7791	-0.571083469	-0.634624791	0.155283944	-0.063541323	0.673748312	0.763926513	FALSE
1604	PF3D7_1110700.e2s1_5162	-0.648529398	-0.836312551	0.504822342	-0.187783153	0.196389576	0.635660862	FALSE
1605	PF3D7_1111000.1o1_6758	-0.20686585	-0.266020914	0.245909616	-0.059155063	0.50914331	0.667635053	FALSE
1606	PF3D7_1111300.1o1_8154	-0.119367166	-0.273228543	0.26484268	-0.153861377	0.478215446	0.653545643	FALSE
1607	PF3D7_1111400.iso1.exon1.amp1_2422	-0.646920703	-0.696515185	0.179919164	-0.049594481	0.626474238	0.732541186	FALSE
1608	PF3D7_1111600.iso1.exon1.amp1_437	-0.006616955	-0.116466758	0.57949959	-0.109849803	0.145206918	0.635660862	FALSE
1609	PF3D7_1111800.iso1.exon1.amp1_2132	-0.940324832	-1.205897402	0.514314532	-0.26557257	0.189078581	0.635660862	FALSE
1610	PF3D7_1111800.iso1.exon2.amp1_2710	-0.296873814	-0.405900368	0.264807114	-0.109026554	0.478272346	0.653545643	FALSE
1611	PF3D7_1111900.iso1.exon1.amp1_693	-0.10872435	-0.160882512	0.127809203	-0.052158163	0.728391525	0.802203392	FALSE
1612	PF3D7_1112100.iso1.exon1.amp1_1397	-0.419188093	-0.28596492	0.440818683	0.133223172	0.252562414	0.635660862	FALSE
1613	PF3D7_1112100.iso1.exon1.amp2_1686	0.264291019	0.278655001	0.099973289	0.014363983	0.785534173	0.842308918	FALSE
1614	PF3D7_1112100.iso1.exon1.amp3_2210	0.093692077	0.101812462	0.034389853	0.008120385	0.925239085	0.941695243	FALSE
1615	PF3D7_1112400.1o1_4663	-0.318408097	-0.548351916	0.398019942	-0.229943819	0.297374248	0.635660862	FALSE
1616	PF3D7_1113000.iso1.exon2.amp1_1889	-0.62391879	-0.832227742	0.82215278	-0.208308952	0.052971563	0.635660862	FALSE
1617	PF3D7_1113000.iso1.exon3.amp1_1542	-0.034278229	-0.232176023	0.269825679	-0.197897794	0.470288148	0.648960613	FALSE
1618	PF3D7_1113000.iso1.exon5.amp1_118	-0.764339804	-0.90014227	0.63914543	-0.135802465	0.113584071	0.635660862	FALSE
1619	PF3D7_1113000.iso1.exon7.amp3_1351	0.264736457	0.077295347	0.279485898	-0.18744111	0.455175129	0.644181533	FALSE
1620	PF3D7_1113700.e1s1_8346	0.114424284	-0.191958161	0.439335317	-0.306382444	0.254014311	0.635660862	FALSE
1621	PF3D7_1114500.iso1.exon1.amp1_3323	-0.597803915	-0.725944457	1.102443925	-0.128140541	0.016886613	0.635660862	FALSE
1622	PF3D7_1114700.e1_8271	-0.206175946	-0.365561003	0.276777856	-0.159385057	0.459377689	0.644181533	FALSE
1623	PF3D7_1114900.e1s1_7681	-0.486945327	-0.497642465	0.035940937	-0.010697138	0.921880102	0.939982475	FALSE
1624	PF3D7_1114900.e1s2_9122	-0.688365421	-0.703265081	0.055673245	-0.01489966	0.879322182	0.907812739	FALSE
1625	PF3D7_1115200.2o7_7060	-0.412168646	-0.503937337	0.285689408	-0.091768691	0.445648403	0.644181533	FALSE
1626	PF3D7_1115300.e1s1_7187	-0.281559394	-0.44058159	0.271014304	-0.159022196	0.4684104	0.648960613	FALSE
1627	PF3D7_1115400.e1s1_6025	0.537157095	0.443917266	0.173458434	-0.093239829	0.638703577	0.740051583	FALSE
1628	PF3D7_1115600.e3s1_6879	-0.162941339	-0.361287852	0.392250257	-0.198346513	0.303889874	0.635660862	FALSE
1629	PF3D7_1115700.e1s1_7476	-0.715890421	-0.960405997	0.395307469	-0.244515576	0.300423053	0.635660862	FALSE
1630	PF3D7_1116000.iso1.exon2.amp1_3093	0.382797969	0.224176522	0.351334498	-0.158621447	0.353458217	0.635660862	FALSE
1631	PF3D7_1116000.iso1.exon2.amp2_3382	0.155655054	-0.042798254	0.587103673	-0.198453308	0.14075581	0.635660862	FALSE
1632	PF3D7_1116800.e4s1_7224	-0.16172217	-0.520080596	0.426481988	-0.358358426	0.266894513	0.635660862	FALSE
1633	PF3D7_1117000.iso1.exon6.amp1_3500	-0.640853483	-0.685924398	0.161789339	-0.045070915	0.661098076	0.756931216	FALSE
1634	PF3D7_1117200.iso1.exon2.amp1_1104	-0.212606218	-0.33615444	0.452050042	-0.123548222	0.241797837	0.635660862	FALSE
1635	PF3D7_1117800.iso1.exon1.amp1_264	-0.249451475	-0.327159932	0.374661832	-0.077708456	0.3244694	0.635660862	FALSE
1636	PF3D7_1117900.iso1.exon1.amp1_2246	-0.495715061	-0.667994895	0.754949511	-0.172279834	0.070117235	0.635660862	FALSE
1637	PF3D7_1118100.iso1.exon1.amp1_3510	-0.645507691	-0.83112197	0.403771418	-0.185614279	0.290993448	0.635660862	FALSE
1638	PF3D7_1118100.iso1.exon2.amp1_2116	-0.14741602	-0.381994561	0.556353317	-0.234578541	0.159577959	0.635660862	FALSE
1639	PF3D7_1118200.e1s1_7968	0.563984092	0.478346093	0.16903218	-0.085637999	0.647152365	0.745221861	FALSE
1640	PF3D7_1118300.e1s1_7205	0.00191572	-0.182100252	0.333734812	-0.184015972	0.376629334	0.635660862	FALSE
1641	PF3D7_1118800.2o7_5861	-0.591813367	-0.798429607	0.349787443	-0.20661624	0.355449936	0.635660862	FALSE
1642	PF3D7_1119400.iso1.exon1.amp3_2783	-0.379547554	-0.442182288	0.09439716	-0.062634734	0.797167483	0.847651733	FALSE
1643	PF3D7_1119500.iso1.exon1.amp1_3300	-0.780634921	-0.803480138	0.095825344	-0.022845218	0.794182498	0.84589601	FALSE
1644	PF3D7_1119500.iso1.exon3.amp1_3827	0.19188497	-0.218833243	0.612081261	-0.410718212	0.127022709	0.635660862	FALSE
1645	PF3D7_1119700.iso1.exon1.amp1_1569	-0.962441049	-1.088485362	0.567183084	-0.126044312	0.152696802	0.635660862	FALSE
1646	PF3D7_1119900.iso1.exon1.amp1_3728	-0.192265598	-0.32553368	0.336202224	-0.133268082	0.373312891	0.635660862	FALSE
1647	PF3D7_1120300.2o2_8189	0.28623681	0.171877234	0.260307866	-0.114359576	0.485507144	0.656711062	FALSE
1648	PF3D7_1120400.iso1.exon2.amp1_1793	-0.180814513	-0.503713969	0.604312373	-0.322899456	0.131152123	0.635660862	FALSE
1649	PF3D7_1120700.iso1.exon1.amp2_3653	-0.554085795	-0.373181788	0.230242671	0.180904007	0.535686926	0.677749668	FALSE
1650	PF3D7_1120800.iso1.exon1.amp1_4126	-0.216929216	-0.348995955	0.418850237	-0.13206674	0.274799626	0.635660862	FALSE
1651	PF3D7_1121200.iso1.exon1.amp1_653	-0.142166295	-0.371306443	0.496733128	-0.229140148	0.202818872	0.635660862	FALSE
1652	PF3D7_1121600.iso1.exon2.amp1_2679	0.325843155	0.026694759	0.439876533	-0.299148396	0.253483754	0.635660862	FALSE
1653	PF3D7_1121700.e1s1_5657	-0.256794075	-0.174179665	0.279367725	0.082614409	0.455357966	0.644181533	FALSE
1654	PF3D7_1121800.s1_7974	1.489295046	1.275711229	1.043004177	-0.213583817	0.021405008	0.635660862	FALSE
1655	PF3D7_1122000.iso1.exon1.amp1_4471	-0.958422876	-1.078933204	0.675821167	-0.120510328	0.097540524	0.635660862	FALSE
1656	PF3D7_1122500.iso1.exon1.amp1_3721	-0.771713927	-0.821785859	0.344165511	-0.050071933	0.362760773	0.635660862	FALSE
1657	PF3D7_1122500.iso1.exon1.amp2_4229	-0.90933433	-0.977155668	0.367709208	-0.067821338	0.332905685	0.635660862	FALSE
1658	PF3D7_1122600.2o2_5848	-0.158966864	-0.358955185	0.50040827	-0.199988321	0.199874927	0.635660862	FALSE
1659	PF3D7_1122800.e1s1_6545	0.064600279	-0.13112429	0.474019732	-0.195724569	0.221882268	0.635660862	FALSE
1660	PF3D7_1122900.e1s1_9126	-0.841335831	-0.910463605	0.232086163	-0.069127774	0.532519624	0.677439621	FALSE
1661	PF3D7_1122900.e2s2_7971	-0.140403294	-0.488959149	0.446719592	-0.348555855	0.24685665	0.635660862	FALSE
1662	PF3D7_1122900.e2s3_6815	-0.080386153	-0.138546008	0.139630031	-0.058159855	0.704649713	0.783751605	FALSE
1663	PF3D7_1122900.e2s5_7132	-0.04858114	-0.150924098	0.35399459	-0.102342958	0.350053774	0.635660862	FALSE
1664	PF3D7_1123000.iso1.exon1.amp3_1921	-0.18367388	-0.29136418	0.225528946	-0.1076903	0.543838278	0.68153677	FALSE
1665	PF3D7_1123200.iso1.exon1.amp1_3335	0.526120656	0.513453802	0.029380925	-0.012666855	0.936097077	0.951020363	FALSE
1666	PF3D7_1123400.e1_5091	0.529213215	0.199650327	0.62354817	-0.329562887	0.121153009	0.635660862	FALSE
1667	PF3D7_1123500.iso1.exon1.amp1_4580	0.212421965	0.016215765	0.265726115	-0.1962062	0.47680351	0.652811055	FALSE
1668	PF3D7_1124000.1o5_7896	-0.092609806	-0.319986437	0.389066501	-0.227376631	0.307534716	0.635660862	FALSE
1669	PF3D7_1124000.2o5_7607	-0.376983839	-0.582534303	0.304820853	-0.205550463	0.417152428	0.638828732	FALSE
1670	PF3D7_1124100.iso1.exon1.amp1_1988	0.16831707	0.098834517	0.161325938	-0.069482553	0.661995343	0.757337798	FALSE
1671	PF3D7_1124300.1o3_7324	-0.831789993	-0.968105563	0.527510234	-0.136315569	0.179323017	0.635660862	FALSE
1672	PF3D7_1124400.iso1.exon1.amp1_1806	0.103257745	-0.055474748	0.347472368	-0.158732492	0.358446612	0.635660862	FALSE
1673	PF3D7_1124500.1o1_7615	0.580068256	0.448845795	0.429816058	-0.131222461	0.263501544	0.635660862	FALSE
1674	PF3D7_1124600.e1s1_5168	-0.46172205	-0.686724135	0.331040588	-0.225002085	0.380276018	0.635660862	FALSE
1675	PF3D7_1124700.e1s1_6312	-0.491262887	-0.721264254	0.597348859	-0.230001367	0.134961267	0.635660862	FALSE
1676	PF3D7_1125300.iso1.exon1.amp1_2856	-0.148379168	-0.139835567	0.034517617	0.008543601	0.92496234	0.941695243	FALSE
1677	PF3D7_1125300.iso1.exon1.amp2_3352	0.231481311	0.176376225	0.300358605	-0.055105086	0.423679156	0.640679519	FALSE
1678	PF3D7_1125400.2o2_5277	-0.788177191	-0.970627188	0.430471237	-0.182449998	0.262839089	0.635660862	FALSE
1679	PF3D7_1125700.6o6_7634	-0.045824629	-0.191803351	0.552993391	-0.145978721	0.161770495	0.635660862	FALSE
1680	PF3D7_1125800.1o4_6747	0.481310056	0.340625802	0.309064618	-0.140684254	0.411012954	0.638828732	FALSE
1681	PF3D7_1125800.3o4_6458	-0.643430509	-0.945056076	0.43620093	-0.301625566	0.257105595	0.635660862	FALSE
1682	PF3D7_1126000.e1s2_8344	-0.135911254	-0.339896126	0.367558406	-0.203984873	0.333090575	0.635660862	FALSE
1683	PF3D7_1126100.iso1.exon2.amp2_220	-0.262228453	-0.398883899	0.596526512	-0.136655446	0.135417944	0.635660862	FALSE
1684	PF3D7_1126300.e2_7985	0.037138963	0.034274971	0.007884316	-0.002863991	0.982830843	0.987566185	FALSE
1685	PF3D7_1126400.2o3_5535	0.158128247	0.061399162	0.299752326	-0.096729085	0.424571561	0.640679519	FALSE
1686	PF3D7_1126500.iso1.exon1.amp1_2267	-0.398709325	-0.518259419	0.481841011	-0.119550094	0.215146529	0.635660862	FALSE
1687	PF3D7_1127000.e6s1_6000	-0.052674061	-0.296603878	0.524769751	-0.243929817	0.181310683	0.635660862	FALSE
1688	PF3D7_1127300.1o1_7293	-0.363355068	-0.422634207	0.349805838	-0.05927914	0.355426204	0.635660862	FALSE
1689	PF3D7_1127400.iso1.exon1.amp1_2346	-0.932982885	-1.238923379	0.443428946	-0.305940494	0.250024717	0.635660862	FALSE
1690	PF3D7_1127400.iso1.exon2.amp1_2078	-0.503652172	-0.639450386	0.398624629	-0.135798214	0.296698045	0.635660862	FALSE
1691	PF3D7_1127600.iso1.exon2.amp1_349	-0.139946642	-0.181561636	0.131805772	-0.041614994	0.720327047	0.795822316	FALSE
1692	PF3D7_1127700.1o3_4715	0.272382706	0.180388239	0.39461029	-0.091994467	0.301210789	0.635660862	FALSE
1693	PF3D7_1127900.3o3_6444	-0.154620947	-0.454416602	0.418993412	-0.299795656	0.274649537	0.635660862	FALSE
1694	PF3D7_1128100.2o3_7845	-0.343789869	-0.486125665	0.547760604	-0.142335797	0.165240588	0.635660862	FALSE
1695	PF3D7_1128300.e1s1_8069	-0.769445038	-0.75386626	0.064337741	0.015578778	0.860760232	0.894195508	FALSE
1696	PF3D7_1128300.e3s1_8903	-0.501158273	-0.608072279	0.678680567	-0.106914006	0.09638669	0.635660862	FALSE
1697	PF3D7_1128500.1o1_8799	-0.423482951	-0.536991975	0.206092208	-0.113509024	0.57823611	0.702244096	FALSE
1698	PF3D7_1129000.e1s1_6583	-0.352451984	-0.584988317	0.393135502	-0.232536333	0.302882688	0.635660862	FALSE
1699	PF3D7_1129100.e1s1_6319	0.240339821	-0.2018483	0.560274781	-0.44218812	0.157053755	0.635660862	FALSE
1700	PF3D7_1129200.2o4_7594	-0.237034528	-0.547982926	0.342759759	-0.310948398	0.36460676	0.635660862	FALSE
1701	PF3D7_1129500.iso1.exon1.amp1_4492	0.20932451	0.161599558	0.229397603	-0.047724952	0.537142721	0.678300838	FALSE
1702	PF3D7_1129600.e1s1_8953	-0.57523579	-0.667721134	0.230732037	-0.092485344	0.534845014	0.677439621	FALSE
1703	PF3D7_1129700.iso1.exon1.amp1_1271	-0.405572408	-0.494939727	0.330877421	-0.08936732	0.380497718	0.635660862	FALSE
1704	PF3D7_1129800.1o1_9026	0.24914884	0.101381808	0.228956622	-0.147767031	0.537903365	0.678300838	FALSE
1705	PF3D7_1130200_5980	1.371098307	1.358247792	0.043395114	-0.012850514	0.905762683	0.926744609	FALSE
1706	PF3D7_1130400_8004	-0.084028492	-0.283371177	0.534043848	-0.199342685	0.174663939	0.635660862	FALSE
1707	PF3D7_1131200.iso1.exon1.amp1_62	-0.486720906	-0.670505262	0.461547744	-0.183784356	0.233005437	0.635660862	FALSE
1708	PF3D7_1131200.iso1.exon6.amp1_345	-0.678534817	-0.895305398	0.638551335	-0.21677058	0.113863862	0.635660862	FALSE
1709	PF3D7_1131600.s2_8288	-0.173739146	-0.201982396	0.097651893	-0.02824325	0.790370294	0.844983779	FALSE
1710	PF3D7_1131800.iso1.exon1.amp1_838	-0.892135008	-0.847885166	0.314985826	0.044249842	0.402557037	0.638828732	FALSE
1711	PF3D7_1132300.1o1_5547	-0.302876037	-0.542510122	0.39607831	-0.239634086	0.299554045	0.635660862	FALSE
1712	PF3D7_1132900.1o1_6392	-0.573939581	-0.653953596	0.257494303	-0.080014015	0.490068103	0.660138962	FALSE
1713	PF3D7_1133200.e1s2_5075	-0.128450425	-0.370110267	0.70081364	-0.241659842	0.087896232	0.635660862	FALSE
1714	PF3D7_1133400_6235	1.55929222	1.23545793	0.614508605	-0.323834289	0.12575803	0.635660862	FALSE
1715	PF3D7_1133500.iso1.exon1.amp1_1264	-0.249427142	-0.36626702	0.332141333	-0.116839878	0.378782935	0.635660862	FALSE
1716	PF3D7_1133500.iso1.exon2.amp1_4149	-0.56238023	-0.611421804	0.151754674	-0.049041574	0.680659259	0.767790355	FALSE
1717	PF3D7_1133700.iso1.exon1.amp1_970	0.021062652	-0.306410096	0.367615908	-0.327472748	0.333020066	0.635660862	FALSE
1718	PF3D7_1133800.iso1.exon1.amp1_1320	-0.321056217	-0.386455448	0.173481982	-0.065399231	0.63865878	0.740051583	FALSE
1719	PF3D7_1133900.iso1.exon2.amp2_3355	-0.525005758	-0.474440609	0.104642765	0.050565149	0.775837251	0.837354755	FALSE
1720	PF3D7_1134000.e1s1_6336	1.458798558	1.098960654	0.78527047	-0.359837904	0.061778688	0.635660862	FALSE
1721	PF3D7_1134200.s1_7422	-0.956892666	-1.060595992	0.399218372	-0.103703325	0.296035306	0.635660862	FALSE
1722	PF3D7_1134300.iso1.exon1.amp1_4294	-0.776812066	-0.939310074	0.612357962	-0.162498008	0.126877935	0.635660862	FALSE
1723	PF3D7_1134300.iso1.exon1.amp2_4583	-0.526682793	-0.644436728	1.0139905	-0.117753935	0.024060771	0.635660862	FALSE
1724	PF3D7_1134300.iso1.exon1.amp3_4228	-0.946913096	-1.003225698	0.393990366	-0.056312602	0.301912649	0.635660862	FALSE
1725	PF3D7_1134500.s1_5988	-0.534420704	-0.592180613	0.401860519	-0.057759909	0.293100836	0.635660862	FALSE
1726	PF3D7_1134500.s2_6572	-0.791812119	-0.857935734	0.206568933	-0.066123615	0.577377561	0.702244096	FALSE
1727	PF3D7_1134700.e1_5101	-0.755382423	-0.95467528	0.463944449	-0.199292857	0.230830992	0.635660862	FALSE
1728	PF3D7_1134700.e2s1_6257	-0.052439959	-0.328713527	0.451400969	-0.276273568	0.242409026	0.635660862	FALSE
1729	PF3D7_1134700.e2s2_6835	0.419041836	0.29408143	0.382623207	-0.124960406	0.315019496	0.635660862	FALSE
1730	PF3D7_1135100.1o1_6774	-0.142286553	-0.317582456	0.254471993	-0.175295904	0.494998832	0.661256181	FALSE
1731	PF3D7_1135400.e1s1_5738	-0.422882712	-0.657472508	0.355236078	-0.234589796	0.348473637	0.635660862	FALSE
1732	PF3D7_1136100.1o1_5019	-0.637002095	-0.702592624	0.247708665	-0.065590528	0.50614997	0.664751529	FALSE
1733	PF3D7_1136200.1o5_8797	-0.025536836	-0.067041695	0.19425366	-0.041504859	0.599790141	0.715055933	FALSE
1734	PF3D7_1136200.5o5_9080	-0.345695794	-0.497640731	0.348037346	-0.151944937	0.357713503	0.635660862	FALSE
1735	PF3D7_1136300.e2s1_5389	-0.020766868	-0.112574343	0.259515581	-0.091807474	0.486788632	0.657204358	FALSE
1736	PF3D7_1136500.1.e4s1_8282	-0.157310885	-0.457601506	0.380730932	-0.300290621	0.317245309	0.635660862	FALSE
1737	PF3D7_1136600.iso1.exon1.amp1_4586	-0.520183261	-0.560291478	0.213250659	-0.040108218	0.56542217	0.695675193	FALSE
1738	PF3D7_1136700.iso1.exon7.amp1_117	-0.603192437	-0.612132313	0.060025205	-0.008939876	0.869987994	0.901162296	FALSE
1739	PF3D7_1136900.e1s1_7134	-0.008107342	-0.093448793	0.298981285	-0.085341452	0.425708429	0.640679519	FALSE
1740	PF3D7_1136900.e2s1_4885	-0.302976485	-0.372401516	0.541380832	-0.069425031	0.169563905	0.635660862	FALSE
1741	PF3D7_1137100_7714	-1.000763301	-1.121290106	0.287482369	-0.120526804	0.442921042	0.644181533	FALSE
1742	PF3D7_1137300.1o1_6196	-0.518700152	-0.726647839	0.35412343	-0.207947687	0.349889532	0.635660862	FALSE
1743	PF3D7_1137600 (renamed)_7629	0.115384164	-0.03698357	0.440158554	-0.152367734	0.253207662	0.635660862	FALSE
1744	PF3D7_1137600.1o2_7251	-0.451103269	-0.642215269	0.423609162	-0.191112001	0.26984753	0.635660862	FALSE
1745	PF3D7_1137900.1o2_5315	-0.673731732	-0.726396478	0.271539872	-0.052664747	0.467581751	0.648960613	FALSE
1746	PF3D7_1137900.2o2_4737	-0.275817998	-0.320817038	0.381424499	-0.044999039	0.316428029	0.635660862	FALSE
1747	PF3D7_1138000.iso1.exon1.amp3_4227	-0.203256688	-0.204673117	0.00692798	-0.00141643	0.984913067	0.988438167	FALSE
1748	PF3D7_1138100.1o1_8413	-0.702597918	-0.763878875	0.136609973	-0.061280957	0.710683256	0.788897803	FALSE
1749	PF3D7_1138400.e1s2_7418	-0.76459364	-0.938149894	0.457418037	-0.173556254	0.236793884	0.635660862	FALSE
1750	PF3D7_1138400.e1s3_5106	-0.210641422	-0.337010115	0.341799422	-0.126368693	0.365871971	0.635660862	FALSE
1751	PF3D7_1138400.e1s4_8575	0.618235117	0.410611365	0.447360709	-0.207623752	0.246243436	0.635660862	FALSE
1752	PF3D7_1138400.e1s5_8576	0.450113331	0.216192577	0.475030897	-0.233920753	0.221001149	0.635660862	FALSE
1753	PF3D7_1138800.3o7_5545	0.000624856	-0.128833057	0.22763099	-0.129457913	0.540193922	0.679698779	FALSE
1754	PF3D7_1139100.iso1.exon1.amp2_3640	-0.478365166	-0.471232693	0.030401902	0.007132473	0.933882611	0.949458608	FALSE
1755	PF3D7_1139200.iso1.exon2.amp1_3587	-0.439406857	-0.605685541	0.376177003	-0.166278684	0.322653682	0.635660862	FALSE
1756	PF3D7_1139300.e2s1_8655	-0.665150628	-0.704220602	0.272765854	-0.039069973	0.465652651	0.648282697	FALSE
1757	PF3D7_1139300.e2s3_8649	0.622648262	0.43722792	0.328653975	-0.185420342	0.383528497	0.635660862	FALSE
1758	PF3D7_1139500.1.e1s1_5751	0.245562837	0.131023779	0.331499093	-0.114539058	0.379653551	0.635660862	FALSE
1759	PF3D7_1140000.2o2_8125	-0.180315593	-0.481049573	0.320592146	-0.30073398	0.394669251	0.637915196	FALSE
1760	PF3D7_1140100 (renamed)_5564	-0.188948206	-0.281685885	0.340573126	-0.092737679	0.367492452	0.635660862	FALSE
1761	PF3D7_1140500.e1s1_7204	-0.356429531	-0.470881276	0.339441435	-0.114451745	0.368992774	0.635660862	FALSE
1762	PF3D7_1140900.3o6_8819	-0.561447885	-0.852084926	0.392554288	-0.290637041	0.303543656	0.635660862	FALSE
1763	PF3D7_1140900.5o6_9108	-0.722335407	-0.934035491	0.486524871	-0.211700085	0.211199586	0.635660862	FALSE
1764	PF3D7_1141200.iso1.exon1.amp1_2920	-0.319017868	-0.505340004	0.410975405	-0.186322137	0.283160759	0.635660862	FALSE
1765	PF3D7_1141400.5o5_5552	-0.359732717	-0.503427945	0.280691384	-0.143695227	0.453312917	0.644181533	FALSE
1766	PF3D7_1141900.1o1_6461	-0.435758203	-0.537121839	0.39232621	-0.101363636	0.303803352	0.635660862	FALSE
1767	PF3D7_1142800_7136	-0.058388736	-0.155032008	0.355619927	-0.096643272	0.347986208	0.635660862	FALSE
1768	PF3D7_1142900.e2_6836	-0.296224451	-0.394796531	0.267597506	-0.09857208	0.473821844	0.650316423	FALSE
1769	PF3D7_1143000.iso1.exon1.amp1_3893	-0.48163953	-0.676565067	0.500653471	-0.194925536	0.199679874	0.635660862	FALSE
1770	PF3D7_1143100.iso1.exon1.amp2_1039	-0.583622519	-0.725754974	0.982174628	-0.142132455	0.027376574	0.635660862	FALSE
1771	PF3D7_1143300.1o1_4684	-0.130050294	-0.287638858	0.354312746	-0.157588563	0.349648302	0.635660862	FALSE
1772	PF3D7_1143900.iso1.exon2.amp1_1547	-0.262947163	-0.669472819	0.580403307	-0.406525656	0.144671095	0.635660862	FALSE
1773	PF3D7_1144200.iso1.exon2.amp1_2141	-0.310043245	-0.481369245	1.252316531	-0.171326001	0.009443402	0.635660862	FALSE
1774	PF3D7_1144500.1o1_6422	-0.649158557	-0.798194506	0.353429745	-0.149035949	0.350774538	0.635660862	FALSE
1775	PF3D7_1144600.iso1.exon1.amp1_3019	-0.922049982	-0.951399589	0.072082363	-0.029349606	0.844248053	0.881665379	FALSE
1776	PF3D7_1145200.iso1.exon1.amp1_1399	-0.610925708	-0.703127981	0.367543592	-0.092202272	0.333108743	0.635660862	FALSE
1777	PF3D7_1145200.iso1.exon1.amp3_2211	0.139956278	-0.009215562	1.092484509	-0.149171839	0.017566678	0.635660862	FALSE
1778	PF3D7_1145400.e1s1_8368	-0.343811466	-0.466769187	0.295967512	-0.122957721	0.430172982	0.641257332	FALSE
1779	PF3D7_1145500.2o2_8228	-0.809735602	-0.965234781	0.401483931	-0.155499179	0.293517623	0.635660862	FALSE
1780	PF3D7_1145900.iso1.exon2.amp1_376	-0.331168086	-0.504246347	0.827066733	-0.17307826	0.051898571	0.635660862	FALSE
1781	PF3D7_1146000.1o1_8205	-0.035086104	-0.199640666	0.420611654	-0.164554562	0.272957912	0.635660862	FALSE
1782	PF3D7_1146500.1o1_8151	-0.433048723	-0.649059686	0.390797388	-0.216010963	0.305548776	0.635660862	FALSE
1783	PF3D7_1146700.iso1.exon1.amp1_3331	-0.816248081	-0.885406289	0.253025436	-0.069158208	0.497370276	0.661877712	FALSE
1784	PF3D7_1146800.e3s1_4831	-0.086668645	-0.225225041	0.307172647	-0.138556396	0.413741922	0.638828732	FALSE
1785	PF3D7_1147200.iso1.exon1.amp3_4233	-0.308251563	-0.388656182	0.189299871	-0.080404619	0.608940464	0.720913209	FALSE
1786	PF3D7_1147800.1.e2s1_5119	-0.72074267	-0.88810393	0.373450511	-0.16736126	0.32592685	0.635660862	FALSE
1787	PF3D7_1147800.iso2.exon1.amp1_325	-0.702819338	-0.871780499	0.377350689	-0.168961162	0.321252773	0.635660862	FALSE
1788	PF3D7_1148900.iso1.exon1.amp1_1825	-0.006311072	-0.248462723	0.525446393	-0.242151651	0.180818064	0.635660862	FALSE
1789	PF3D7_1149000.e1s1_5748	-0.066046844	-0.116024031	0.201520222	-0.049977187	0.586507176	0.708160796	FALSE
1790	PF3D7_1149000.s4 (renamed)_8579	0.105307703	-0.223385386	0.57663519	-0.328693089	0.146917547	0.635660862	FALSE
1791	PF3D7_1149000.s6 (renamed)_7423	0.18201175	-0.055457296	0.777834013	-0.237469046	0.063726611	0.635660862	FALSE
1792	PF3D7_1149100.iso2.exon1.amp1_4097	-0.525653415	-0.533579923	0.015887931	-0.007926507	0.965411924	0.973046383	FALSE
1793	PF3D7_1149100.iso2.exon2.amp1_3610	-0.564393098	-0.658751649	0.41627429	-0.094358552	0.277511695	0.635660862	FALSE
1794	PF3D7_1149200.e2s1_6829	0.848149952	0.705671115	0.745258042	-0.142478837	0.073013617	0.635660862	FALSE
1795	PF3D7_1149200.e2s2_6546	-0.162204008	-0.320769566	0.352003147	-0.158565558	0.35260006	0.635660862	FALSE
1796	PF3D7_1149500.3o4_7655	-0.136460922	-0.244517256	0.505477241	-0.108056334	0.195877131	0.635660862	FALSE
1797	PF3D7_1149500.e2_6825	-0.259580328	-0.374532916	0.533525262	-0.114952589	0.175029667	0.635660862	FALSE
1798	PF3D7_1149900.iso1.exon2.amp1_4166	0.515442324	0.241049885	0.461825337	-0.274392439	0.23275268	0.635660862	FALSE
1799	PF3D7_1150000.iso1.exon2.amp1_3314	-0.009474036	-0.363145953	0.645062177	-0.353671917	0.110833426	0.635660862	FALSE
1800	PF3D7_1150200.iso1.exon1.amp1_412	0.101660104	-0.103013003	0.572280591	-0.204673107	0.14955424	0.635660862	FALSE
1801	PF3D7_1150300.iso1.exon1.amp1_2740	-0.69487092	-0.766828304	0.171769428	-0.071957385	0.641920845	0.741023487	FALSE
1802	PF3D7_1150400.iso1.exon2.amp1_714	0.779499315	0.644998694	0.143944746	-0.134500621	0.69606917	0.778654209	FALSE
1803	PF3D7_1200100.iso1.exon1.amp2_794	0.008183748	-0.277596584	0.601836545	-0.285780332	0.132494632	0.635660862	FALSE
1804	PF3D7_1200200.iso1.exon1.amp1_2148	0.454708992	0.112794124	0.63354211	-0.341914868	0.116249468	0.635660862	FALSE
1805	PF3D7_1200300.e2s1_7189	0.691557781	0.433708845	0.598018181	-0.257848937	0.134590644	0.635660862	FALSE
1806	PF3D7_1200400.iso1.exon1.amp2_776	-0.427363136	-0.517413375	1.034649941	-0.090050239	0.022136394	0.635660862	FALSE
1807	PF3D7_1200400.iso1.exon2.amp1_720	0.507066397	0.383805497	0.287360407	-0.1232609	0.443106193	0.644181533	FALSE
1808	PF3D7_1200500.iso1.exon1.amp1_2436	-0.030033417	-0.249293894	0.574428348	-0.219260477	0.148248309	0.635660862	FALSE
1809	PF3D7_1200600.iso1.exon2.amp3_2805	-0.774393168	-0.678595248	0.281065003	0.095797921	0.452736829	0.644181533	FALSE
1810	PF3D7_1200800.iso1.exon2.amp1_4209	-0.651236407	-0.773153592	0.789165293	-0.121917184	0.060782548	0.635660862	FALSE
1811	PF3D7_1201200.2o2_4660	-0.529465656	-0.53133036	0.004310505	-0.001864704	0.990612673	0.992382256	FALSE
1812	PF3D7_1201300.1o1_7539	-0.226767838	-0.27825304	0.143033822	-0.051485201	0.697876782	0.779887859	FALSE
1813	PF3D7_1201300_8869	-0.369796833	-0.451864421	0.269386062	-0.082067587	0.470983928	0.64960105	FALSE
1814	PF3D7_1201400.iso1.exon1.amp1_218	0.981365663	0.763680224	0.692332736	-0.21768544	0.091059171	0.635660862	FALSE
1815	PF3D7_1201400.iso1.exon1.amp2_2193	0.445066005	0.302993646	0.445116116	-0.142072359	0.248396074	0.635660862	FALSE
1816	PF3D7_1202200_6847	-0.771982075	-1.003607597	0.329153122	-0.231625521	0.382846536	0.635660862	FALSE
1817	PF3D7_1202300.e14s1_9188	-0.654898996	-0.93097923	0.382503956	-0.276080234	0.315159395	0.635660862	FALSE
1818	PF3D7_1202300.e31s1_7502	-0.230212516	-0.489286013	0.333886354	-0.259073497	0.376425007	0.635660862	FALSE
1819	PF3D7_1202300.e33s1_5173	-0.507650844	-0.58064163	0.219226215	-0.072990787	0.554854866	0.688108379	FALSE
1820	PF3D7_1202300.e34s1_6594	-0.401575717	-0.495006478	0.259371607	-0.093430761	0.487021745	0.657204358	FALSE
1821	PF3D7_1202600.e1_8857	-0.733275647	-0.838461642	0.228399331	-0.105185995	0.538865577	0.678786648	FALSE
1822	PF3D7_1203700.e3_8270	-0.153540342	-0.249941991	0.261735265	-0.096401648	0.483204043	0.65565006	FALSE
1823	PF3D7_1203900 (renamed)_7587	-0.345472923	-0.51764339	0.255955816	-0.172170467	0.492574003	0.661068441	FALSE
1824	PF3D7_1204300_6840	-0.493984398	-0.684917573	0.327376043	-0.190933176	0.385278625	0.635660862	FALSE
1825	PF3D7_1205100.iso1.exon1.amp1_152	-0.586020164	-0.731534625	0.514308569	-0.145514461	0.189083095	0.635660862	FALSE
1826	PF3D7_1205400.iso1.exon1.amp2_488	-0.693458102	-0.745761435	0.279187511	-0.052303333	0.455636887	0.644181533	FALSE
1827	PF3D7_1205500.e1s1_6267	-0.55245917	-0.73844468	0.53044338	-0.18598551	0.177217583	0.635660862	FALSE
1828	PF3D7_1205500.e1s2_5111	-0.476912104	-0.702184282	0.34962301	-0.225272178	0.355662141	0.635660862	FALSE
1829	PF3D7_1205800.3o4_5646	-0.518289593	-0.497480064	0.110129061	0.020809529	0.76449874	0.829587642	FALSE
1830	PF3D7_1206000.1o1_7583	-0.473946128	-0.706939607	0.37922757	-0.23299348	0.319022648	0.635660862	FALSE
1831	PF3D7_1206100.e2s1_6587	-0.977414573	-0.994224932	0.097875209	-0.01681036	0.789904629	0.844983779	FALSE
1832	PF3D7_1206600.iso1.exon1.amp1_261	-0.233018954	-0.330030743	0.720071679	-0.09701179	0.081110465	0.635660862	FALSE
1833	PF3D7_1206900 (renamed, has duplicates)_7621	-0.726909587	-0.776181731	0.192921595	-0.049272144	0.602243141	0.716409986	FALSE
1834	PF3D7_1206900.4o4_7049	0.298550345	0.097647378	0.48866791	-0.200902967	0.209415161	0.635660862	FALSE
1835	PF3D7_1207000.e3s1_7223	-0.319072075	-0.422942772	0.584157536	-0.103870697	0.142464945	0.635660862	FALSE
1836	PF3D7_1207200.iso1.exon1.amp3_2782	-1.014862549	-0.868875128	0.39983512	0.145987421	0.295348175	0.635660862	FALSE
1837	PF3D7_1207400.2o2_8755	-0.561594588	-0.736995388	0.441417526	-0.1754008	0.251978283	0.635660862	FALSE
1838	PF3D7_1207500.e3s1_6870	-0.518253	-0.705106125	0.351776232	-0.186853124	0.352891106	0.635660862	FALSE
1839	PF3D7_1207600.1o1_4730	-0.420243907	-0.482152431	0.228985148	-0.061908523	0.537854141	0.678300838	FALSE
1840	PF3D7_1208000.iso1.exon1.amp1_342	-0.589641884	-0.741916686	0.399248248	-0.152274802	0.296001991	0.635660862	FALSE
1841	PF3D7_1208100 (renamed, has duplicates)_7883	-0.822135453	-0.803406216	0.075234486	0.018729237	0.837550914	0.876592357	FALSE
1842	PF3D7_1208100.e2s1_5771	-0.860377696	-0.896848032	0.137971891	-0.036470335	0.707959597	0.786497112	FALSE
1843	PF3D7_1208100.e2s2_5482	-0.547625812	-0.6754371	0.307249074	-0.127811288	0.413631431	0.638828732	FALSE
1844	PF3D7_1208500.iso1.exon1.amp2_seg1_1423	-0.773740863	-0.876245523	0.875414149	-0.102504659	0.04245533	0.635660862	FALSE
1845	PF3D7_1208800.e1s1_6623	0.406425575	0.273819801	0.24356538	-0.132605774	0.513060776	0.668845721	FALSE
1846	PF3D7_1208900.s1_5377	-0.643556732	-0.69078019	0.267714398	-0.047223458	0.47363602	0.650316423	FALSE
1847	PF3D7_1209400.e1s1_8090	-0.288130718	-0.401720856	0.330853812	-0.113590137	0.380529805	0.635660862	FALSE
1848	PF3D7_1209500.1.3o3_5905	-0.508012935	-0.641612471	0.367056037	-0.133599536	0.33370709	0.635660862	FALSE
1849	PF3D7_1209500.iso2.exon2.amp1_3320	-0.391272934	-0.573444948	0.820240235	-0.182172014	0.053395262	0.635660862	FALSE
1850	PF3D7_1209900.1o1_8507	-0.812903284	-0.90692676	0.733580676	-0.094023477	0.076662507	0.635660862	FALSE
1851	PF3D7_1210100.1o1_7277	0.056176449	-0.136196036	0.531228133	-0.192372485	0.176658111	0.635660862	FALSE
1852	PF3D7_1210600.iso1.exon1.amp1_4021	0.022058682	-0.074767246	0.252892534	-0.096825929	0.497588522	0.661877712	FALSE
1853	PF3D7_1210600.iso1.exon1.amp2_4535	-0.654269832	-0.731201856	0.407675744	-0.076932024	0.286726462	0.635660862	FALSE
1854	PF3D7_1211000.e3s1_5406	-0.597289058	-0.759622414	0.357011646	-0.162333356	0.346223393	0.635660862	FALSE
1855	PF3D7_1211000.e3s2_8300	0.632646524	0.411887075	0.368029934	-0.220759449	0.33251273	0.635660862	FALSE
1856	PF3D7_1211300.e2s1_4865	-0.645892306	-0.599792378	0.151568504	0.046099928	0.681024737	0.767830061	FALSE
1857	PF3D7_1211600.iso1.exon1.amp2_2832	-0.635025795	-0.676273172	0.195159356	-0.041247377	0.598125473	0.714502175	FALSE
1858	PF3D7_1211900.e1s1_5489	0.708026894	0.569240314	0.282792219	-0.13878658	0.4500802	0.644181533	FALSE
1859	PF3D7_1211900.e2s1_8064	-0.538576967	-0.778980054	0.596119984	-0.240403087	0.135644241	0.635660862	FALSE
1860	PF3D7_1212000 (renamed)_7876	-0.381352954	-0.520729613	0.461066901	-0.139376659	0.233443825	0.635660862	FALSE
1861	PF3D7_1212000.e2s1_5966	-0.570014799	-0.734770427	0.454544607	-0.164755628	0.23946121	0.635660862	FALSE
1862	PF3D7_1212400.1o1_5266	-0.415085355	-0.575298665	0.474327572	-0.16021331	0.221613694	0.635660862	FALSE
1863	PF3D7_1212500.1o1_4735	-0.665116715	-0.815058017	0.29879413	-0.149941302	0.425984709	0.640679519	FALSE
1864	PF3D7_1212700.s1_9130	-0.666659027	-0.862214737	0.398665995	-0.195555711	0.296651832	0.635660862	FALSE
1865	PF3D7_1212800_6558	-0.23147821	-0.378142408	0.296139619	-0.146664198	0.42991713	0.641257332	FALSE
1866	PF3D7_1212900.e1s1_8355	0.204584421	0.207866601	0.011168583	0.00328218	0.97568123	0.981984986	FALSE
1867	PF3D7_1213400.e1s1_8061	0.08474491	0.069898199	0.045375943	-0.014846711	0.901487393	0.923892781	FALSE
1868	PF3D7_1213500.1o2_5618	-0.635375169	-0.813762283	0.265313464	-0.178387114	0.477462674	0.653075774	FALSE
1869	PF3D7_1214000.iso1.exon2.amp1_2096	-0.277879571	-0.489195291	0.555744108	-0.211315719	0.159973452	0.635660862	FALSE
1870	PF3D7_1215100.e1s1_8868	-0.345173698	-0.504172638	0.372964553	-0.15899894	0.326513014	0.635660862	FALSE
1871	PF3D7_1215200.iso1.exon1.amp1_1558	0.125215421	-0.139709559	0.649714918	-0.264924979	0.108715624	0.635660862	FALSE
1872	PF3D7_1215400.1o1_8489	-0.448575067	-0.618364438	0.394271561	-0.169789371	0.301594123	0.635660862	FALSE
1873	PF3D7_1215900.1o1_5893	-0.403696715	-0.555418813	0.340059831	-0.151722098	0.368172367	0.635660862	FALSE
1874	PF3D7_1216300.iso1.exon1.amp1_2121	-0.437112054	-0.626871756	0.41263585	-0.189759701	0.281380391	0.635660862	FALSE
1875	PF3D7_1216500.e1s1_7177	-0.441178298	-0.417327526	0.096917226	0.023850772	0.79190289	0.844983779	FALSE
1876	PF3D7_1216600_6846	0.364983251	0.0724792	0.316218187	-0.292504051	0.400813294	0.638828732	FALSE
1877	PF3D7_1216900.e1s1_6556	-0.594004399	-0.67687712	0.323808709	-0.082872721	0.39019571	0.636855536	FALSE
1878	PF3D7_1217900.3o3_5875	-0.48424827	-0.606767791	1.203062252	-0.122519521	0.011399357	0.635660862	FALSE
1879	PF3D7_1218200.e1s2_6823	-0.623399848	-0.735496986	0.299129408	-0.112097139	0.425489858	0.640679519	FALSE
1880	PF3D7_1218500.e3s1_4808	-0.646782926	-0.816610644	0.395945126	-0.169827717	0.299704043	0.635660862	FALSE
1881	PF3D7_1218600.e2s1_6329	-0.650398742	-0.779499464	0.526991454	-0.129100721	0.179697761	0.635660862	FALSE
1882	PF3D7_1219000.iso1.exon1.amp1_seg1_4603	-0.294035217	-0.374733688	0.263446742	-0.080698471	0.480452186	0.654743154	FALSE
1883	PF3D7_1219100.e1s1_9152	-0.431499283	-0.624190618	0.235075504	-0.192691335	0.527408417	0.676502029	FALSE
1884	PF3D7_1219100.e1s2_9153	-0.90657796	-1.079347927	0.367222871	-0.172769967	0.333502249	0.635660862	FALSE
1885	PF3D7_1219300.iso1.exon1.amp1_4486	0.032295777	-0.033003336	0.199081001	-0.065299112	0.590947309	0.710228963	FALSE
1886	PF3D7_1219600.iso1.exon3.amp1_2541	-0.494341152	-0.604329849	0.356916916	-0.109988696	0.34634316	0.635660862	FALSE
1887	PF3D7_1219600.iso1.exon3.amp2_2830	-0.292387074	-0.317811847	0.068505045	-0.025424773	0.851865321	0.88664824	FALSE
1888	PF3D7_1219700.e1s1_6308	-0.278976318	-0.695492453	0.709222491	-0.416516135	0.084866988	0.635660862	FALSE
1889	PF3D7_1219800.iso1.exon1.amp1_616	-0.57604668	-0.814759006	0.390400636	-0.238712326	0.306003069	0.635660862	FALSE
1890	PF3D7_1219900.1o1_5820	-0.279421802	-0.549158495	0.43607684	-0.269736693	0.257228634	0.635660862	FALSE
1891	PF3D7_1220100.1o1_7044	0.301755635	0.181641054	0.436271012	-0.120114581	0.257036129	0.635660862	FALSE
1892	PF3D7_1220300.iso1.exon1.amp1_2695	-0.306344931	-0.492859522	0.704429523	-0.186514591	0.086580788	0.635660862	FALSE
1893	PF3D7_1220600.2o4_7295	-0.245093507	-0.388920225	0.506546956	-0.143826718	0.195042678	0.635660862	FALSE
1894	PF3D7_1221000.e1s1_8662	-0.289952513	-0.469781617	1.424322104	-0.179829105	0.005004733	0.635660862	FALSE
1895	PF3D7_1221000.e1s3_4910	0.538726737	0.501999683	0.187703195	-0.036727054	0.611905927	0.72304434	FALSE
1896	PF3D7_1221300.iso1.exon6.amp1_1262	0.049752848	-0.086417059	0.529093412	-0.136169907	0.178183789	0.635660862	FALSE
1897	PF3D7_1221400.e1s1_6610	0.130590634	-0.044810345	0.810338462	-0.175400979	0.055644633	0.635660862	FALSE
1898	PF3D7_1221500.1o1_6483	-0.432844359	-0.690424672	0.326211342	-0.257580313	0.386878886	0.635660862	FALSE
1899	PF3D7_1221600.1o1_4708	0.641949545	0.453189012	0.245644492	-0.188760533	0.509585394	0.667699741	FALSE
1900	PF3D7_1221900.1o1_9091	-0.738859485	-0.809493217	0.221955252	-0.070633732	0.550068366	0.683381346	FALSE
1901	PF3D7_1222300.e1s1_9154	-1.018027039	-1.146044081	0.50146088	-0.128017042	0.1990388	0.635660862	FALSE
1902	PF3D7_1222600 (renamed, has duplicates)_6843	1.430044599	1.326817852	0.235498801	-0.103226747	0.526687145	0.67621147	FALSE
1903	PF3D7_1222600.e1s1_5687	-0.437007283	-0.575096817	0.292381409	-0.138089534	0.435528654	0.642555154	FALSE
1904	PF3D7_1222700.1o1_8121	-0.538871949	-0.578180312	0.30320768	-0.039308363	0.419503524	0.639515524	FALSE
1905	PF3D7_1223100.e3s1_6322	-0.576736144	-0.81177984	0.685127118	-0.235043696	0.093834065	0.635660862	FALSE
1906	PF3D7_1223600.1o2_8535	-0.075865555	-0.320105346	0.392500324	-0.244239791	0.303605084	0.635660862	FALSE
1907	PF3D7_1223600.e1_5670	0.367824491	0.115223028	0.323765226	-0.252601462	0.390255933	0.636855536	FALSE
1908	PF3D7_1223600.e2s1_8263	-0.69304689	-0.83958449	0.363105688	-0.1465376	0.33858645	0.635660862	FALSE
1909	PF3D7_1223700.1o2_5258	0.469982523	0.410588813	0.070786129	-0.05939371	0.847006137	0.883425183	FALSE
1910	PF3D7_1223800.iso1.exon1.amp1_short_2872	-0.360249249	-0.4190826	0.099564231	-0.058833351	0.786385626	0.842764407	FALSE
1911	PF3D7_1223900.iso1.exon1.amp1_106	-0.79389429	-0.827625556	0.386747219	-0.033731266	0.310212142	0.635660862	FALSE
1912	PF3D7_1224200.1o5_7077	-0.426165323	-0.505564225	0.334769597	-0.079398902	0.375235777	0.635660862	FALSE
1913	PF3D7_1224500.2o2_4969	0.146551007	-0.114401967	0.373690599	-0.260952974	0.325637564	0.635660862	FALSE
1914	PF3D7_1225600.e2s1_7774	-0.422488894	-0.58135376	0.502279697	-0.158864867	0.198390548	0.635660862	FALSE
1915	PF3D7_1226000.e1_5411	0.162092379	0.074120052	0.305222264	-0.087972328	0.416568879	0.638828732	FALSE
1916	PF3D7_1226100.1o1_4971	-0.491859572	-0.741431496	0.368451764	-0.249571924	0.331996461	0.635660862	FALSE
1917	PF3D7_1226300.e1s1_6601	-0.595658805	-0.808567045	0.423886432	-0.212908241	0.269561328	0.635660862	FALSE
1918	PF3D7_1226400.iso1.exon3.amp1_1587	-0.205795516	-0.471161812	0.550261397	-0.265366296	0.163573733	0.635660862	FALSE
1919	PF3D7_1226800.2o5_6721	-0.589831495	-0.666293927	0.186136105	-0.076462431	0.614824045	0.724214033	FALSE
1920	PF3D7_1227100.e1s1_4898	-0.21082393	-0.293994029	0.280925548	-0.083170099	0.452951797	0.644181533	FALSE
1921	PF3D7_1227200.iso1.exon1.amp2_815	-0.460140492	-0.639923299	0.393552718	-0.179782808	0.302408943	0.635660862	FALSE
1922	PF3D7_1227300.e1s2_8357	-0.576609488	-0.658464205	0.282375706	-0.081854716	0.450719847	0.644181533	FALSE
1923	PF3D7_1227500.2o2_5357	-0.423841329	-0.512044926	0.31244926	-0.088203597	0.406163701	0.638828732	FALSE
1924	PF3D7_1228100.iso1.exon2.amp1_2994	-0.35741447	-0.503915294	0.319608788	-0.146500824	0.396044452	0.63867593	FALSE
1925	PF3D7_1228100.iso1.exon3.amp1_2404	-0.463424976	-0.605740136	0.407518715	-0.14231516	0.286897074	0.635660862	FALSE
1926	PF3D7_1228300.iso1.exon1.amp1_2480	-0.651868371	-0.672456551	0.092283819	-0.02058818	0.801591159	0.850742471	FALSE
1927	PF3D7_1228400.s2_4794	-0.168531398	-0.369945275	0.336588953	-0.201413877	0.372795102	0.635660862	FALSE
1928	PF3D7_1228600.e1s1_5187	-0.404431102	-0.518028326	0.311670735	-0.113597224	0.407275392	0.638828732	FALSE
1929	PF3D7_1228700.iso1.exon1.amp1_seg2_1438	-0.261825315	-0.371754349	0.615391026	-0.109929034	0.125301254	0.635660862	FALSE
1930	PF3D7_1228800.e1s1_8000	-0.395996624	-0.639439996	0.319455996	-0.243443371	0.396258446	0.63867593	FALSE
1931	PF3D7_1228800.e1s4_5484	-0.099987031	-0.196110446	0.228902885	-0.096123415	0.5379961	0.678300838	FALSE
1932	PF3D7_1229300.1o1_8528	-0.244322483	-0.433069961	0.635444595	-0.188747477	0.115337823	0.635660862	FALSE
1933	PF3D7_1229600.iso1.exon2.amp1_804	0.603596342	0.543445196	0.249726075	-0.060151146	0.502806843	0.663351418	FALSE
1934	PF3D7_1229600.iso1.exon2.amp2_1093	1.469297493	1.43280568	0.173183962	-0.036491813	0.639225834	0.740076938	FALSE
1935	PF3D7_1230000.iso1.exon10.amp2_1646	-0.537582176	-0.645068857	0.261845419	-0.107486682	0.483026611	0.65565006	FALSE
1936	PF3D7_1230000.iso1.exon2.amp1_2063	-0.432604641	-0.535435215	0.956810588	-0.102830574	0.030362404	0.635660862	FALSE
1937	PF3D7_1230000.iso1.exon6.amp1_333	-0.344746482	-0.569053281	0.265495745	-0.224306799	0.477171426	0.652995939	FALSE
1938	PF3D7_1230400.5o5_7268	-0.2503126	-0.51703825	0.427964354	-0.26672565	0.265381439	0.635660862	FALSE
1939	PF3D7_1230600.iso1.exon1.amp1_71	-0.5030914	-0.618448815	0.383303717	-0.115357415	0.314222115	0.635660862	FALSE
1940	PF3D7_1230700.1o1_6777	-0.043392225	-0.27190566	0.32296682	-0.228513434	0.391362935	0.636901723	FALSE
1941	PF3D7_1231000.iso1.exon7.amp1_4124	-0.309613356	-0.516164718	0.365714435	-0.206551361	0.335357939	0.635660862	FALSE
1942	PF3D7_1231400.iso1.exon4.amp1_924	-0.017620054	-0.341943901	0.397662792	-0.324323847	0.29777423	0.635660862	FALSE
1943	PF3D7_1231500.1o1_4656	-0.697006473	-0.843959178	0.288880083	-0.146952705	0.440803039	0.644181533	FALSE
1944	PF3D7_1231600.iso1.exon1.amp2_1920	-0.352151644	-0.549644254	0.544335954	-0.197492611	0.167548583	0.635660862	FALSE
1945	PF3D7_1232000.1o2_6457	-0.878589654	-0.932595067	0.120620005	-0.054005413	0.742990894	0.811904313	FALSE
1946	PF3D7_1232100.e1_8842	-0.044343537	-0.161148876	0.484932983	-0.116805339	0.212533784	0.635660862	FALSE
1947	PF3D7_1232100.e2_4807	-0.206120002	-0.255233368	0.229997699	-0.049113366	0.536108689	0.677749668	FALSE
1948	PF3D7_1232600.iso1.exon1.amp1_709	-0.610970045	-0.767321472	0.643573007	-0.156351427	0.111519623	0.635660862	FALSE
1949	PF3D7_1232700.iso1.exon1.amp1_3259	-0.441191456	-0.723836585	0.65381547	-0.282645129	0.106881615	0.635660862	FALSE
1950	PF3D7_1233200.iso2.exon1.amp1_3096	-0.997298512	-0.934156013	0.172892214	0.063142499	0.639781205	0.740076938	FALSE
1951	PF3D7_1233200.iso2.exon1.amp2_seg2_2883	-0.936821319	-0.911606774	0.096592598	0.025214544	0.792580414	0.844983779	FALSE
1952	PF3D7_1233200.iso2.exon1.amp3_seg1_1729	-0.393727857	-0.322911439	0.19189859	0.070816418	0.604130765	0.717712029	FALSE
1953	PF3D7_1233300.s1_7401	0.048227535	-0.052183633	0.337351166	-0.100411168	0.371776178	0.635660862	FALSE
1954	PF3D7_1233300.s2_5950	-0.420349116	-0.548012631	0.405511805	-0.127663514	0.289084977	0.635660862	FALSE
1955	PF3D7_1233400.1o4_5291	-0.51935216	-0.716620962	0.432158746	-0.197268802	0.261139321	0.635660862	FALSE
1956	PF3D7_1233600.e1s3_8293	-0.362585673	-0.425594113	0.240840089	-0.063008441	0.517639155	0.671254206	FALSE
1957	PF3D7_1233700.iso1.exon1.amp1_1031	-0.547967404	-0.720775366	0.417962678	-0.172807962	0.275731576	0.635660862	FALSE
1958	PF3D7_1233800.3o3_4664	-0.563853967	-0.702470459	0.413253869	-0.138616492	0.280720116	0.635660862	FALSE
1959	PF3D7_1234300.2o2_6755	-0.423791771	-0.678139903	0.42959126	-0.254348132	0.263729163	0.635660862	FALSE
1960	PF3D7_1234600.iso1.exon1.amp1_2569	-0.538003196	-0.71432847	0.536017651	-0.176325274	0.173278306	0.635660862	FALSE
1961	PF3D7_1234600.iso1.exon1.amp2_3083	-0.71353153	-0.837211895	0.432705116	-0.123680364	0.260590979	0.635660862	FALSE
1962	PF3D7_1234700.iso1.exon2.amp1_2955	-0.172686873	-0.415608626	0.401099376	-0.242921752	0.293943731	0.635660862	FALSE
1963	PF3D7_1234800.e1s1_7490	-0.281744051	-0.399006803	0.359198811	-0.117262752	0.343467122	0.635660862	FALSE
1964	PF3D7_1234800.e1s2_8941	0.130277451	0.0701056	0.113618718	-0.060171851	0.757318563	0.823920471	FALSE
1965	PF3D7_1235000.iso1.exon2.amp1_3863	-0.368098663	-0.590052233	0.84066567	-0.22195357	0.049043251	0.635660862	FALSE
1966	PF3D7_1235000.iso1.exon3.amp1_650	1.061828359	0.853291807	0.471462861	-0.208536552	0.224124046	0.635660862	FALSE
1967	PF3D7_1235200.iso1.exon2.amp1_3400	-0.407721261	-0.577714974	0.240764826	-0.169993714	0.517765961	0.671254206	FALSE
1968	PF3D7_1235200.iso1.exon2.amp2_2539	-0.291283437	-0.358000171	0.10180376	-0.066716735	0.781727924	0.840053565	FALSE
1969	PF3D7_1235400.e1s2_5177	-0.428017851	-0.554122508	0.430695359	-0.126104658	0.262612801	0.635660862	FALSE
1970	PF3D7_1235800.iso1.exon4.amp1_2414	-0.268562718	-0.419990006	0.244173581	-0.151427288	0.51204256	0.668845721	FALSE
1971	PF3D7_1236000.1o1_6739	0.605902806	0.579225284	0.075104307	-0.026677523	0.837827217	0.876592357	FALSE
1972	PF3D7_1236100.e2s1_7758	0.166330728	-0.149722109	0.510939871	-0.316052837	0.191649254	0.635660862	FALSE
1973	PF3D7_1236200.iso1.exon1.amp2_4226	-0.591393833	-0.796444344	0.707101946	-0.205050511	0.085621055	0.635660862	FALSE
1974	PF3D7_1236300.1o1_5000	-0.840147658	-0.927607879	0.283971951	-0.087460221	0.448271891	0.644181533	FALSE
1975	PF3D7_1236500.1o1_7853	-0.32716872	-0.428880312	0.2911015	-0.101711592	0.437451515	0.643875771	FALSE
1976	PF3D7_1237300.iso1.exon3.amp1_116	-0.181029039	-0.335320652	0.591850853	-0.154291613	0.138042327	0.635660862	FALSE
1977	PF3D7_1237400.3o3_5573	-0.590280945	-0.686458616	0.203949909	-0.096177672	0.582103313	0.705061637	FALSE
1978	PF3D7_1237400.e3_7403	-0.435770372	-0.585506244	0.439768093	-0.149735872	0.253589983	0.635660862	FALSE
1979	PF3D7_1237900.iso1.exon1.amp1_4591	-0.612018406	-0.661759209	0.251262505	-0.049740803	0.500270387	0.662415459	FALSE
1980	PF3D7_1238200.iso1.exon1.amp1_3886	-0.848465383	-0.987420871	0.575746239	-0.138955489	0.147452251	0.635660862	FALSE
1981	PF3D7_1238400.iso1.exon4.amp1_630	0.341017361	0.243861701	0.326123702	-0.09715566	0.386999502	0.635660862	FALSE
1982	PF3D7_1238600.iso1.exon1.amp1_1581	-0.661917142	-0.795701322	0.287454014	-0.133784179	0.442964084	0.644181533	FALSE
1983	PF3D7_1238800.e1s1_6061	0.475317519	0.252716509	0.260694275	-0.22260101	0.484882958	0.656183308	FALSE
1984	PF3D7_1239200.e1s2_7139	-1.252750894	-1.300407845	0.336928752	-0.047656951	0.372340598	0.635660862	FALSE
1985	PF3D7_1239400.1o1_5240	-1.044457871	-1.118791099	0.133774313	-0.074333228	0.716368734	0.791932978	FALSE
1986	PF3D7_1239600.1o1_9028	-0.483269658	-0.711988992	0.455363332	-0.228719334	0.238698579	0.635660862	FALSE
1987	PF3D7_1239700.e1s1_5983	0.138515754	-0.006373969	0.235021124	-0.144889723	0.527501122	0.676502029	FALSE
1988	PF3D7_1239800.s5_6570	0.494882075	0.337183814	0.530853619	-0.157698261	0.176924911	0.635660862	FALSE
1989	PF3D7_1240000.iso1.exon1.amp1_735	-0.732377796	-0.788115553	0.17831304	-0.055737757	0.629502893	0.734856833	FALSE
1990	PF3D7_1240300.iso1.exon1.amp2_2520	-0.583899589	-0.661184878	0.391584461	-0.077285289	0.304649177	0.635660862	FALSE
1991	PF3D7_1240300.iso1.exon2.amp1_4487	0.481544935	0.367081047	0.232529061	-0.114463888	0.531760416	0.677439621	FALSE
1992	PF3D7_1240400.iso1.exon2.amp1_1013	1.370922014	1.192082624	0.329873709	-0.17883939	0.381863641	0.635660862	FALSE
1993	PF3D7_1240600.iso1.exon2.amp1_2168	0.013677229	-0.134777145	0.333574062	-0.148454375	0.37684617	0.635660862	FALSE
1994	PF3D7_1240900.iso1.exon3.amp1_1880	0.721596286	0.540250366	0.307668104	-0.181345919	0.41302601	0.638828732	FALSE
1995	PF3D7_1240900.iso1.exon4.amp2_3972	-0.294931307	-0.818011407	0.447469449	-0.5230801	0.246139557	0.635660862	FALSE
1996	PF3D7_1241300.iso1.exon1.amp1_2759	-0.313215865	-0.380517356	0.445091783	-0.067301492	0.248419498	0.635660862	FALSE
1997	PF3D7_1241400.iso1.exon1.amp2_seg2_276	-0.850304093	-1.024829087	0.657805138	-0.174524995	0.105125952	0.635660862	FALSE
1998	PF3D7_1241700.e2s1_7179	-0.376494535	-0.556547533	0.434895803	-0.180052998	0.258402173	0.635660862	FALSE
[truncated: 806 more rows]
