# Supplementary material for: Proteome-wide analysis of a malaria vaccine study reveals personalized humoral immune profiles in Tanzanian adults
Source: eLife. 2020 Jul 14;9:e53080. doi: 10.7554/eLife.53080 (PMC7386907; doi:10.7554/eLife.53080)
Supplement: Figure 4—source data 2. [file elife-53080-fig4-data2.csv]

GROUP 2
	protein_ID	mean_seorpositivy_time1	mean_seorpositivy_time2	size_eff	log_FC	p_value	adj.p_value	is_threshold_reached
1	MAL13P1.303e4s1_6254	-0.511364655	-0.575962702	0.220267341	-0.064598047	0.363123521	0.512671731	FALSE
2	MAL8P1.143_14o15_5934	0.140204581	-0.030648118	0.441105718	-0.170852698	0.078593702	0.425460158	FALSE
3	MAL8P1.143_3o15_6506	0.101825095	-0.02583193	0.362263261	-0.127657024	0.142708087	0.425460158	FALSE
4	PF3D7_0100100.iso1.exon2.amp1_1871	0.205563531	-0.017060127	0.42912902	-0.222623658	0.086311341	0.425460158	FALSE
5	PF3D7_0100200.iso1.exon1.amp1_706	0.157169311	-0.110270525	0.394894069	-0.267439836	0.112151188	0.425460158	FALSE
6	PF3D7_0100300.iso1.exon1.amp1_1010	-0.262592012	-0.388108117	0.487112548	-0.125516106	0.054348585	0.425460158	FALSE
7	PF3D7_0100300.iso1.exon2.amp1_1317	0.049026502	-0.054611572	0.477484198	-0.103638074	0.058776853	0.425460158	FALSE
8	PF3D7_0100400.iso1.exon2.amp1_991	0.575131752	0.343812135	0.393997045	-0.231319617	0.112909658	0.425460158	FALSE
9	PF3D7_0100600.iso1.exon1.amp1_2163	1.060493989	0.878189595	0.236487079	-0.182304394	0.329770238	0.492897521	FALSE
10	PF3D7_0100800.iso1.exon2.amp1_133	-0.005083501	-0.207048979	0.461636404	-0.201965478	0.066779663	0.425460158	FALSE
11	PF3D7_0100900.iso1.exon1.amp1_2446	0.488542979	0.197925117	0.375013797	-0.290617862	0.130021525	0.425460158	FALSE
12	PF3D7_0101000.iso1.exon1.amp1_2157	-0.282785423	-0.440460465	0.496130436	-0.157675042	0.050478293	0.425460158	FALSE
13	PF3D7_0101100.iso1.exon1.amp1_3004	-0.182460459	-0.299585784	0.407897291	-0.117125326	0.10163941	0.425460158	FALSE
14	PF3D7_0101300.iso1.exon2.amp1_4146	0.253327646	-0.020415609	0.329909068	-0.273743254	0.179591302	0.425460158	FALSE
15	PF3D7_0101600.iso1.exon1.amp1_3887	0.012199175	0.121665734	0.263375777	0.10946656	0.279363281	0.462832299	FALSE
16	PF3D7_0101800.iso1.exon1.amp1_2719	1.001101973	0.789122416	0.47528786	-0.211979557	0.05983167	0.425460158	FALSE
17	PF3D7_0101900.iso1.exon1.amp1_123	0.457512412	0.276764114	0.339084152	-0.180748299	0.16841715	0.425460158	FALSE
18	PF3D7_0102200.e1s1_8021	-1.01698239	-1.101882868	0.389326256	-0.084900477	0.116930525	0.425460158	FALSE
19	PF3D7_0102200.e2s1_7477	1.00839164	1.020617008	0.025332519	0.012225368	0.915668994	0.943600096	FALSE
20	PF3D7_0102200.e2s2_7188	0.845900577	0.839425584	0.020451025	-0.006474993	0.931871035	0.95328945	FALSE
21	PF3D7_0102500.e1s2_8945	-0.54637246	-0.616158321	0.242164321	-0.069785861	0.31862221	0.486345496	FALSE
22	PF3D7_0102600.2o3_6170	0.269208773	0.203219109	0.234925532	-0.065989664	0.33288431	0.494515987	FALSE
23	PF3D7_0102700.2o2_7571	-0.37455461	-0.615391253	0.392119541	-0.240836643	0.11451143	0.425460158	FALSE
24	PF3D7_0103400.e1s1_5925	-0.305578392	-0.390097669	0.256529695	-0.084519278	0.291624309	0.470619313	FALSE
25	PF3D7_0103500.2o7_7085	-0.831805379	-0.906842498	0.254571402	-0.075037119	0.295203066	0.471652078	FALSE
26	PF3D7_0103800.e4s1_7155	-0.395829854	-0.58272993	0.392987272	-0.186900076	0.113768729	0.425460158	FALSE
27	PF3D7_0103900.1o1_9076	0.036335734	0.077801768	0.072794553	0.041466034	0.761195164	0.829534101	FALSE
28	PF3D7_0104000.3o3_6106	-0.352349308	-0.458413323	0.487072393	-0.106064015	0.054366406	0.425460158	FALSE
29	PF3D7_0104100.1o2_5053	-0.691014314	-0.801318829	0.259737644	-0.110304515	0.285830692	0.467601669	FALSE
30	PF3D7_0104100.2o2_5342	-0.565567048	-0.412053933	0.22160263	0.153513116	0.360293415	0.511637923	FALSE
31	PF3D7_0104600.e1s1_7213	-1.035307736	-1.07272404	0.1579787	-0.037416304	0.5117034	0.623291196	FALSE
32	PF3D7_0105600.e2_4833	-0.574824341	-0.626770211	0.231044424	-0.05194587	0.340713526	0.498882886	FALSE
33	PF3D7_0105700.iso1.exon1.amp2_233	-0.630855306	-0.707103423	0.244294282	-0.076248117	0.314509881	0.482696063	FALSE
34	PF3D7_0105700.iso1.exon1.amp3_522	-0.251016035	-0.357887831	0.362111097	-0.106871796	0.142865539	0.425460158	FALSE
35	PF3D7_0105900.iso1.exon1.amp1_short_2005	-0.559903131	-0.62723472	0.338193879	-0.067331588	0.169475904	0.425460158	FALSE
36	PF3D7_0106200.iso1.exon1.amp1_3577	-0.342976067	-0.404006274	0.253134911	-0.061030207	0.297848556	0.472379723	FALSE
37	PF3D7_0106500.iso1.exon1.amp1_2562	-0.596751553	-0.718461318	0.352634316	-0.121709764	0.152961422	0.425460158	FALSE
38	PF3D7_0107900.iso1.exon1.amp1_696	-0.784434042	-0.87910708	0.239080911	-0.094673038	0.32464313	0.490198889	FALSE
39	PF3D7_0108000.e1s1_7463	-0.431272291	-0.557456753	0.284388906	-0.126184462	0.244124416	0.44333094	FALSE
40	PF3D7_0108300.s1_7972	0.283444306	-0.056493425	0.377085488	-0.33993773	0.128052951	0.425460158	FALSE
41	PF3D7_0108300.s2_7111	0.893024051	0.598424269	0.340745897	-0.294599782	0.166455403	0.425460158	FALSE
42	PF3D7_0108300.s3_7689	0.173083401	-0.009940451	0.218971867	-0.183023853	0.365883701	0.515805882	FALSE
43	PF3D7_0108400.iso1.exon1.amp1_short_3733	-0.403165673	-0.537127711	0.379453072	-0.133962038	0.12583419	0.425460158	FALSE
44	PF3D7_0108400.iso1.exon7.amp1_45	-0.279347186	-0.367252819	0.459807728	-0.087905633	0.067763454	0.425460158	FALSE
45	PF3D7_0108600.iso1.exon4.amp1_4380	0.017761387	-0.102242552	0.307288426	-0.12000394	0.209710191	0.428257891	FALSE
46	PF3D7_0108600.iso1.exon5.amp1_634	-0.468711366	-0.495875128	0.267008531	-0.027163762	0.273014287	0.460421317	FALSE
47	PF3D7_0108700.e1s1_7776	0.077819829	-0.094399755	0.240389883	-0.172219584	0.322077325	0.487901036	FALSE
48	PF3D7_0108800.iso1.exon6.amp1_1233	-0.120760244	-0.241736787	0.391024113	-0.120976543	0.115454953	0.425460158	FALSE
49	PF3D7_0109200.iso1.exon1.amp1_2413	-0.733636847	-0.80503376	0.287265684	-0.071396913	0.239576389	0.439990201	FALSE
50	PF3D7_0109800.1o1_7336	-0.52487008	-0.604472688	0.338888463	-0.079602607	0.168649407	0.425460158	FALSE
51	PF3D7_0109900.iso2.exon16.amp1_324	-0.45606276	-0.639883549	0.463210956	-0.183820789	0.065942872	0.425460158	FALSE
52	PF3D7_0110000.1o1_8428	-0.531241461	-0.623473049	0.267505198	-0.092231588	0.272154679	0.460421317	FALSE
53	PF3D7_0110500.e1s2_5766	-0.055444776	0.005680633	0.121113031	0.06112541	0.613978688	0.711403405	FALSE
54	PF3D7_0110500.e1s3_5188	-1.008563311	-1.113977913	0.245399137	-0.105414602	0.312391773	0.481896358	FALSE
55	PF3D7_0110600.e1s1_6533	-0.467815756	-0.715998782	0.310335567	-0.248183026	0.205433649	0.426342335	FALSE
56	PF3D7_0110600.e3_5665	-0.374110275	-0.374084189	0.000111696	2.61E-05	0.999627411	0.999627411	FALSE
57	PF3D7_0110700.e1s1_7186	-0.63307824	-0.718621404	0.400841446	-0.085543164	0.107232417	0.425460158	FALSE
58	PF3D7_0110800.iso1.exon3.amp1_2717	-0.500122752	-0.61085888	0.423389012	-0.110736129	0.09024122	0.425460158	FALSE
59	PF3D7_0111000.e1s2_6049	-0.45073348	-0.587357151	0.24741329	-0.136623671	0.308556863	0.479863252	FALSE
60	PF3D7_0111000.e5s1_5681	-0.464480867	-0.532939345	0.24879396	-0.068458478	0.305947768	0.47887335	FALSE
61	PF3D7_0111300.iso1.exon1.amp1_1701	-0.346870658	-0.500199537	0.445116181	-0.153328879	0.076149544	0.425460158	FALSE
62	PF3D7_0111500.e4s1_8619	0.471214139	0.288727925	0.394069091	-0.182486214	0.112848578	0.425460158	FALSE
63	PF3D7_0111500.e5s1_5099	-0.451419049	-0.539323001	0.208562314	-0.087903951	0.388579094	0.529272337	FALSE
64	PF3D7_0111700.iso1.exon1.amp1_961	-0.464468506	-0.550385969	0.371831889	-0.085917463	0.13309486	0.425460158	FALSE
65	PF3D7_0112000.3o4_5862	0.639670481	0.466249564	0.463509576	-0.173420917	0.065785237	0.425460158	FALSE
66	PF3D7_0112100.1o1_6684	0.108141506	0.127018645	0.028897609	0.018877139	0.903859863	0.936247896	FALSE
67	PF3D7_0112200.iso1.exon1.amp2_183	0.529456472	0.303576157	0.530927081	-0.225880314	0.037792789	0.425460158	FALSE
68	PF3D7_0113100.iso1.exon1.amp1_4475	-0.075278867	-0.128646493	0.207657671	-0.053367626	0.390594759	0.530683521	FALSE
69	PF3D7_0113100.iso1.exon2.amp1_4270	-0.964909233	-1.069810522	0.26818966	-0.104901289	0.270973355	0.460421317	FALSE
70	PF3D7_0113100.iso1.exon2.amp2_3349	-0.672291323	-0.724499397	0.1648714	-0.052208074	0.493706689	0.609215305	FALSE
71	PF3D7_0113300.2o2_5313	-1.315681456	-1.469302493	0.401025202	-0.153621037	0.107083453	0.425460158	FALSE
72	PF3D7_0113400.2o2_8752	0.090771344	0.081692491	0.021042596	-0.009078853	0.929905781	0.951973644	FALSE
73	PF3D7_0113800.2o4_7664	-0.13537959	-0.18381434	0.224654367	-0.04843475	0.353882157	0.507822706	FALSE
74	PF3D7_0113800.3o4_7092	-0.307158698	-0.391370804	0.148533085	-0.084212105	0.536961049	0.645642702	FALSE
75	PF3D7_0113900.2o2_5532	-0.515624318	-0.6017436	0.246373612	-0.086119282	0.310532136	0.480801827	FALSE
76	PF3D7_0114000.e2s2_8371	-0.729215401	-0.71529609	0.034668062	0.013919311	0.884795881	0.921607596	FALSE
77	PF3D7_0114100.iso1.exon1.amp1_2718	-0.031125676	-0.255503502	0.313506474	-0.224377826	0.201057054	0.426342335	FALSE
78	PF3D7_0115000.e1s1_6895	-0.167832213	-0.209470255	0.152222417	-0.041638043	0.527014922	0.636686705	FALSE
79	PF3D7_0115200.iso1.exon2.amp1_719	0.214592896	-0.008194953	0.657761033	-0.222787848	0.012550002	0.425460158	FALSE
80	PF3D7_0115300.iso1.exon2.amp1_1279	-0.107893785	-0.186412455	0.268777207	-0.07851867	0.269962357	0.459645102	FALSE
81	PF3D7_0115400.iso1.exon2.amp1_2714	0.809473921	0.451152943	0.383457991	-0.358320979	0.122155327	0.425460158	FALSE
82	PF3D7_0115700.iso1.exon1.amp1_1583	1.176873897	0.798933969	0.452105208	-0.377939929	0.072051202	0.425460158	FALSE
83	PF3D7_0115700.iso1.exon2.amp2_4262	-0.55266354	-0.692228855	0.364116906	-0.139565315	0.140801651	0.425460158	FALSE
84	PF3D7_0200100 (renamed)_4770	0.144829157	-0.08110108	0.491763159	-0.225930237	0.052320136	0.425460158	FALSE
85	PF3D7_0200100.iso1.exon2.amp1_2746	0.791517485	0.575417753	0.819134879	-0.216099731	0.002895002	0.425460158	FALSE
86	PF3D7_0200200.iso1.exon1.amp1_1284	0.531290355	0.286759848	0.41878011	-0.244530507	0.093509385	0.425460158	FALSE
87	PF3D7_0200400.iso1.exon1.amp1_1275	0.954180094	0.616975004	0.370723396	-0.33720509	0.134179826	0.425460158	FALSE
88	PF3D7_0200500.iso1.exon1.amp1_3303	0.376309798	0.03356209	0.553539793	-0.342747708	0.031205681	0.425460158	FALSE
89	PF3D7_0200600.iso1.exon1.amp1_2442	0.56480558	0.321128401	0.275545718	-0.243677179	0.258518591	0.450960176	FALSE
90	PF3D7_0200700.iso1.exon1.amp1_700	-0.198303739	-0.405201219	0.444267724	-0.20689748	0.076660928	0.425460158	FALSE
91	PF3D7_0200800.iso1.exon3.amp1_406	0.156254658	-0.055703502	0.408574019	-0.21195816	0.101116516	0.425460158	FALSE
92	PF3D7_0201000.iso1.exon1.amp1_3595	-0.042738401	-0.132469429	0.277960104	-0.089731028	0.254526349	0.449994881	FALSE
93	PF3D7_0201200.iso1.exon2.amp1_3603	0.832368952	0.60579816	0.300140707	-0.226570792	0.22001719	0.43001912	FALSE
94	PF3D7_0201300.iso1.exon2.amp1_119	1.355633018	1.072375395	0.331783534	-0.283257623	0.17726079	0.425460158	FALSE
95	PF3D7_0201500.2o2_5533	-0.606024853	-0.690305466	0.250397176	-0.084280613	0.302938174	0.477289267	FALSE
96	PF3D7_0201700.2o2_8813	-0.163063564	-0.326217231	0.560375442	-0.163153667	0.029435911	0.425460158	FALSE
97	PF3D7_0201800.iso1.exon1.amp1_4451	0.096615746	0.056431081	0.230166736	-0.040184665	0.342501749	0.498975674	FALSE
98	PF3D7_0201800.iso1.exon2.amp1_3566	-0.658015106	-0.653648218	0.024933083	0.004366888	0.916993418	0.943924209	FALSE
99	PF3D7_0201900.e2s1_5490	-0.547846938	-0.528743548	0.09192292	0.01910339	0.701382609	0.781798398	FALSE
100	PF3D7_0202000.e2s1_8364	-0.528964634	-0.72354931	0.394881401	-0.194584677	0.112161869	0.425460158	FALSE
101	PF3D7_0202300.2o2_8437	-0.760600191	-0.672410412	0.148344692	0.088189779	0.53747169	0.645702922	FALSE
102	PF3D7_0202400.e1s1_5756	-0.634435891	-0.677581835	0.434172197	-0.043145943	0.082983635	0.425460158	FALSE
103	PF3D7_0202500.1o1_7250	0.415697255	0.404884415	0.034694447	-0.01081284	0.884708869	0.921607596	FALSE
104	PF3D7_0202600.iso2.exon1.amp1_2518	-0.4840519	-0.555482205	0.163581818	-0.071430305	0.497045465	0.611815401	FALSE
105	PF3D7_0202700.iso1.exon1.amp1_2186	-0.160729573	-0.259324846	0.279805447	-0.098595273	0.251506682	0.448616244	FALSE
106	PF3D7_0203000.iso1.exon1.amp1_538	-0.864526779	-0.997871906	0.464191161	-0.133345127	0.065426709	0.425460158	FALSE
107	PF3D7_0203000.iso1.exon1.amp2_1055	-0.058131542	-0.080891716	0.094653254	-0.022760174	0.692996602	0.774168315	FALSE
108	PF3D7_0203100.e1s1_6609	-0.515503072	-0.598260713	0.285859995	-0.082757641	0.241790509	0.441681165	FALSE
109	PF3D7_0203100.e2s2_7084	0.548047477	0.494054082	0.244315062	-0.053993396	0.314469949	0.482696063	FALSE
110	PF3D7_0203100.e2s3_5060	-0.397904262	-0.543691112	0.332517118	-0.14578685	0.176355439	0.425460158	FALSE
111	PF3D7_0203200.1o1_5016	-0.559375909	-0.633080742	0.243821294	-0.073704833	0.315419782	0.483827719	FALSE
112	PF3D7_0203800.iso1.exon12.amp1_2119	-0.497852514	-0.591397044	0.305353889	-0.09354453	0.212461502	0.43001912	FALSE
113	PF3D7_0204100.iso1.exon1.amp1_247	-0.411555703	-0.489884921	0.312019984	-0.078329218	0.203099446	0.426342335	FALSE
114	PF3D7_0204100.iso1.exon1.amp2_536	-0.359480948	-0.42572396	0.281235521	-0.066243013	0.24918534	0.446749165	FALSE
115	PF3D7_0204100.iso1.exon1.amp3_476	-0.115505065	-0.046620922	0.27281131	0.068884143	0.263096919	0.452919237	FALSE
116	PF3D7_0204300.1o1_4751	-0.446789509	-0.387193998	0.109880342	0.059595511	0.647002403	0.738700821	FALSE
117	PF3D7_0204500.1o1_5582	-0.215726334	-0.379837759	0.450826099	-0.164111425	0.072786238	0.425460158	FALSE
118	PF3D7_0204600.iso1.exon1.amp2_seg2_1153	-0.333474099	-0.402177765	0.324621744	-0.068703666	0.186298907	0.425460158	FALSE
119	PF3D7_0204800.iso1.exon1.amp1_3895	-0.555714434	-0.682090533	0.58581758	-0.126376099	0.023642641	0.425460158	FALSE
120	PF3D7_0206000.s2_8261	0.030372796	-0.077207251	0.47658823	-0.107580047	0.059205105	0.425460158	FALSE
121	PF3D7_0206100.1o4_7281	-0.740430633	-0.8063441	0.105223271	-0.065913466	0.660924955	0.749689957	FALSE
122	PF3D7_0206200.1o1_7052	0.05621623	-0.086114951	0.275297197	-0.142331181	0.258932198	0.450960176	FALSE
123	PF3D7_0206800_8292	0.985263585	1.016183394	0.111412543	0.030919809	0.642450772	0.735278352	FALSE
124	PF3D7_0206900.1.1o2_4674	0.181524065	0.281124282	0.152410842	0.099600217	0.526509709	0.636624935	FALSE
125	PF3D7_0206900.1.2o2_5836	-0.334046152	-0.43481933	0.261020627	-0.100773177	0.283537481	0.465202053	FALSE
126	PF3D7_0206900.1.e1_8561	-0.57825932	-0.569642956	0.017599159	0.008616364	0.941351333	0.958441953	FALSE
127	PF3D7_0207000.1o2_6703	0.35334733	0.471356342	0.190550841	0.118009012	0.430006942	0.563057189	FALSE
128	PF3D7_0207000.2o2_6414	-0.621689062	-0.577880784	0.096941083	0.043808277	0.686001101	0.768137861	FALSE
129	PF3D7_0207000.e1_7116	0.274356427	0.400739151	0.197755006	0.126382724	0.413110283	0.546325631	FALSE
130	PF3D7_0207100.s1_9173	-0.497736638	-0.536618961	0.158443459	-0.038882323	0.51047828	0.622069143	FALSE
131	PF3D7_0207200_6262	-0.543258242	-0.635040291	0.306928683	-0.091782048	0.210219682	0.428383712	FALSE
132	PF3D7_0207300.iso1.exon2.amp1_4172	-0.639804168	-0.654309432	0.085598542	-0.014505265	0.720958854	0.797148512	FALSE
133	PF3D7_0207300.iso1.exon5.amp1_1780	-0.353289894	-0.440393845	0.291666753	-0.087103951	0.232744967	0.436247701	FALSE
134	PF3D7_0207400.4o4_5635	-0.332637186	-0.364636304	0.222784334	-0.031999118	0.357801448	0.510053513	FALSE
135	PF3D7_0207500.e1s1_8609	0.205348608	0.039672945	0.439939709	-0.165675664	0.079317255	0.425460158	FALSE
136	PF3D7_0207500.e3s1_8088	0.425834386	0.246050119	0.413638426	-0.179784267	0.09727698	0.425460158	FALSE
137	PF3D7_0207600.e2s1_8341	0.293581347	0.133069937	0.344703493	-0.160511411	0.161858678	0.425460158	FALSE
138	PF3D7_0207600.e4s1_8076	-0.358819187	-0.516169426	0.303475944	-0.15735024	0.215159431	0.43001912	FALSE
139	PF3D7_0207700.2o4_5642	0.564440129	0.399411738	0.245444053	-0.165028392	0.312305882	0.481896358	FALSE
140	PF3D7_0207700.4o4_8238	-0.51517329	-0.582596801	0.155507827	-0.067423511	0.518244705	0.629072793	FALSE
141	PF3D7_0208000.4o4_7083	-0.550274251	-0.61504578	0.201834289	-0.064771529	0.403735333	0.539116014	FALSE
142	PF3D7_0208100.iso2.exon10.amp1_1520	0.076861399	0.124288875	0.07133664	0.047427476	0.765824191	0.833606767	FALSE
143	PF3D7_0208100.iso2.exon13.amp1_3822	-0.06812213	-0.222990534	0.303277553	-0.154868403	0.215446012	0.43001912	FALSE
144	PF3D7_0208700.iso2.exon4.amp1_1767	-0.484193272	-0.600908361	0.35990461	-0.116715089	0.145165077	0.425460158	FALSE
145	PF3D7_0208900.e1s3_5063	-1.124041468	-1.229231575	0.359401099	-0.105190107	0.145694131	0.425460158	FALSE
146	PF3D7_0209100.2o3_8219	-0.333848274	-0.290754537	0.088662032	0.043093736	0.711450311	0.790375068	FALSE
147	PF3D7_0209300.1o2_6694	-0.436102139	-0.485157883	0.204095177	-0.049055743	0.398599648	0.535284201	FALSE
148	PF3D7_0209400.2o7_8465	-0.632441119	-0.738411862	0.279940407	-0.105970743	0.251286909	0.448509544	FALSE
149	PF3D7_0209800.e2_6830	-0.043835491	-0.129152674	0.162503944	-0.085317183	0.499846156	0.614005879	FALSE
150	PF3D7_0210200.iso1.exon2.amp2_seg1_2597	2.091383624	1.889192656	0.425812313	-0.202190968	0.088563355	0.425460158	FALSE
151	PF3D7_0210300.e2_9137	-0.800600101	-0.77079966	0.07505614	0.029800441	0.754032854	0.823970429	FALSE
152	PF3D7_0210600.3o5_4701	-0.164398025	-0.261250908	0.313653098	-0.096852883	0.200856485	0.426342335	FALSE
153	PF3D7_0210700.1o1_6705	-0.23604	-0.328175698	0.494043977	-0.092135699	0.051350724	0.425460158	FALSE
154	PF3D7_0211100.iso1.exon1.amp1_3153	-0.431822328	-0.434963479	0.008914103	-0.003141151	0.970272299	0.981473134	FALSE
155	PF3D7_0211100.iso1.exon1.amp2_1349	-0.004559061	-0.003478984	0.003024053	0.001080077	0.989912814	0.994133359	FALSE
156	PF3D7_0211200.1o1_7850	0.309401417	0.201527476	0.201259669	-0.107873942	0.405047458	0.540063277	FALSE
157	PF3D7_0211300.iso1.exon2.amp1_77	-0.487017452	-0.533013578	0.286845136	-0.045996126	0.24023716	0.439990201	FALSE
158	PF3D7_0211900.iso1.exon1.amp1_2450	-0.296678066	-0.410669277	0.33427472	-0.11399121	0.174201575	0.425460158	FALSE
159	PF3D7_0212200.iso1.exon2.amp1_4153	-0.540085957	-0.658684362	0.313166718	-0.118598404	0.201522423	0.426342335	FALSE
160	PF3D7_0212300.e3s1_4883	-0.446717437	-0.454218188	0.032947525	-0.007500751	0.890473012	0.927176504	FALSE
161	PF3D7_0212400.3o3_6803	-0.479618816	-0.472780862	0.019088537	0.006837954	0.936399055	0.955301431	FALSE
162	PF3D7_0212500.iso1.exon1.amp1_3098	-0.730675136	-0.750105333	0.133851515	-0.019430197	0.577537895	0.679285342	FALSE
163	PF3D7_0212700.1o1_4996	-0.17247385	-0.160770107	0.064641894	0.011703742	0.787195418	0.847205475	FALSE
164	PF3D7_0212900.1o1_9032	-0.751399296	-0.849574156	0.432863477	-0.09817486	0.08383613	0.425460158	FALSE
165	PF3D7_0213000.1o1_4661	-0.75172237	-0.835467949	0.204929383	-0.08374558	0.396715595	0.533520637	FALSE
166	PF3D7_0213400.iso1.exon2.amp1_388	-0.449462944	-0.497007359	0.16104133	-0.047544415	0.503661101	0.617361906	FALSE
167	PF3D7_0213400.iso1.exon3.amp1_84	-0.34231976	-0.497309386	0.314893228	-0.154989625	0.199166452	0.426342335	FALSE
168	PF3D7_0213500.iso1.exon3.amp1_4447	-0.40379388	-0.501757174	0.261192873	-0.097963294	0.283230645	0.465202053	FALSE
169	PF3D7_0213900.iso1.exon1.amp2_1348	-0.569846726	-0.653653071	0.263327135	-0.083806346	0.279449031	0.462832299	FALSE
170	PF3D7_0214100.e1s1_6246	0.336224774	0.045701876	0.533817655	-0.290522899	0.036884094	0.425460158	FALSE
171	PF3D7_0214300.iso1.exon1.amp1_2559	-0.405409882	-0.535496976	0.415708998	-0.130087094	0.095744129	0.425460158	FALSE
172	PF3D7_0214300.iso1.exon1.amp2_2848	-0.634244636	-0.612265305	0.060899029	0.021979331	0.799221397	0.857313236	FALSE
173	PF3D7_0215700.e2s2_6920	0.641461374	0.40345752	0.450982727	-0.238003854	0.072695874	0.425460158	FALSE
174	PF3D7_0216400.1o1_7065	-0.468930774	-0.640333116	0.333645898	-0.171402341	0.174969697	0.425460158	FALSE
175	PF3D7_0216700.1.6o7_7390	-0.513627404	-0.637632318	0.546017244	-0.124004915	0.033267938	0.425460158	FALSE
176	PF3D7_0216700.iso2.exon6.amp1_679	0.118938056	-0.057879111	0.521125636	-0.176817167	0.041030562	0.425460158	FALSE
177	PF3D7_0216900.1o1_7051	0.048379065	-0.072613335	0.502346373	-0.1209924	0.047958768	0.425460158	FALSE
178	PF3D7_0217400.2o2_6962	0.451958756	0.26100243	0.371200251	-0.190956325	0.133712182	0.425460158	FALSE
179	PF3D7_0217700.iso1.exon1.amp1_3848	0.02578956	-0.153433828	0.457943729	-0.179223388	0.068779592	0.425460158	FALSE
180	PF3D7_0217900.e1s1_7766	0.472253944	0.497007278	0.063621165	0.024753334	0.790469722	0.850202187	FALSE
181	PF3D7_0218300.1o4_6226	-0.50817497	-0.633457832	0.372406899	-0.125282862	0.132534974	0.425460158	FALSE
182	PF3D7_0218300.2o4_6804	-0.574166703	-0.64486019	0.374272692	-0.070693488	0.13073193	0.425460158	FALSE
183	PF3D7_0218300.e2_6243	-0.41507403	-0.484266498	0.289136351	-0.069192468	0.236654085	0.437776265	FALSE
184	PF3D7_0219300.1o1_5228	-0.215728862	-0.206652103	0.022098679	0.009076759	0.926398538	0.949787671	FALSE
185	PF3D7_0219400.iso1.exon2.amp1_1777	-1.657335318	-1.635286711	0.043054427	0.022048607	0.857221957	0.89990654	FALSE
186	PF3D7_0219600.e1s1_8817	-0.100814868	-0.121093497	0.070219887	-0.020278629	0.769376186	0.83457323	FALSE
187	PF3D7_0219700.2o2_6131	0.521537789	0.390613	0.203973525	-0.130924789	0.398874889	0.53539741	FALSE
188	PF3D7_0219900.2o2_6693	0.098732754	-0.071008265	0.348597231	-0.169741019	0.157438545	0.425460158	FALSE
189	PF3D7_0220000.e2s1_7105	1.678355136	1.772745826	0.279270427	0.09439069	0.252379358	0.449030278	FALSE
190	PF3D7_0220000.e2s2_7394	0.884994231	0.882411701	0.003719979	-0.002582531	0.98759163	0.992713049	FALSE
191	PF3D7_0220100.e2s1_7661	0.147954975	0.014875938	0.396358291	-0.133079037	0.110922535	0.425460158	FALSE
192	PF3D7_0220600.2o2_6976	-0.081297788	-0.113099848	0.267204616	-0.031802059	0.27267467	0.460421317	FALSE
193	PF3D7_0221400.iso1.exon2.amp1_3871	-0.195626689	-0.316437242	0.354530638	-0.120810553	0.150895113	0.425460158	FALSE
194	PF3D7_0221600.1o1_5812	0.184280608	-0.037348272	0.469514958	-0.22162888	0.062686166	0.425460158	FALSE
195	PF3D7_0222000.iso1.exon1.amp1_691	-0.40927974	-0.608949692	0.476438738	-0.199669952	0.059276833	0.425460158	FALSE
196	PF3D7_0222100.iso1.exon1.amp1_3007	0.513271672	0.298537437	0.304223951	-0.214734235	0.214081606	0.43001912	FALSE
197	PF3D7_0222500.iso1.exon2.amp1_987	0.44520777	0.238183933	0.324156471	-0.207023837	0.186898704	0.425460158	FALSE
198	PF3D7_0222600.iso1.exon2.amp1_1008	0.073088772	-0.159134384	0.319845692	-0.232223157	0.192530011	0.425460158	FALSE
199	PF3D7_0222700.iso1.exon2.amp1_1289	-0.077405131	-0.230574077	0.379574474	-0.153168947	0.125721305	0.425460158	FALSE
200	PF3D7_0222800.iso1.exon2.amp1_1564	0.738626384	0.390524151	0.372746596	-0.348102233	0.132205148	0.425460158	FALSE
201	PF3D7_0222900.1o1_4649	0.209382579	0.131812971	0.223381877	-0.077569608	0.356545867	0.509460095	FALSE
202	PF3D7_0223100.iso1.exon2.amp1_989	-0.164107122	-0.370237151	0.415418068	-0.206130029	0.095958225	0.425460158	FALSE
203	PF3D7_0223200.iso1.exon2.amp1_3607	0.350067144	0.123523361	0.33214142	-0.226543783	0.176818636	0.425460158	FALSE
204	PF3D7_0223300 (renamed)_6619	0.745999645	0.615299016	0.445076001	-0.130700629	0.076173692	0.425460158	FALSE
205	PF3D7_0223300.iso1.exon2.amp1_3611	1.100234509	1.062654046	0.063108624	-0.037580463	0.792115383	0.851645526	FALSE
206	PF3D7_0223400.iso1.exon2.amp1_1856	-0.295215728	-0.454134802	0.475539459	-0.158919074	0.059709975	0.425460158	FALSE
207	PF3D7_0223500.iso1.exon1.amp1_3027	-0.082254148	-0.269675892	0.512474631	-0.187421745	0.044099011	0.425460158	FALSE
208	PF3D7_0223500.iso1.exon2.amp1_4551	-0.456348702	-0.528358379	0.449819817	-0.072009677	0.073369185	0.425460158	FALSE
209	PF3D7_0300100.iso1.exon2.amp1_138	1.398280648	1.111424361	0.515776006	-0.286856286	0.042903936	0.425460158	FALSE
210	PF3D7_0300200.iso1.exon1.amp1_3012	0.819550896	0.490903162	0.349437512	-0.328647734	0.156497854	0.425460158	FALSE
211	PF3D7_0300400.iso1.exon1.amp1_401	1.068220023	0.759579188	0.444013766	-0.308640834	0.076814586	0.425460158	FALSE
212	PF3D7_0300500.iso1.exon1.amp1_134	-0.128064657	-0.304959629	0.328820072	-0.176894972	0.180956606	0.425460158	FALSE
213	PF3D7_0300700.iso1.exon2.amp1_3592	1.031324415	0.852104158	0.396466568	-0.179220257	0.11083214	0.425460158	FALSE
214	PF3D7_0300800.iso1.exon2.amp1_1572	-0.497176243	-0.65362813	0.569007101	-0.156451887	0.027335372	0.425460158	FALSE
215	PF3D7_0300900.iso1.exon2.amp1_1555	-0.663405387	-0.701506062	0.261290288	-0.038100676	0.283057219	0.465202053	FALSE
216	PF3D7_0301100.2o2_9008	-0.554850998	-0.573578432	0.070320042	-0.018727434	0.76905741	0.83457323	FALSE
217	PF3D7_0301200.iso1.exon3.amp1_short_4317	-0.437618395	-0.476656499	0.117797722	-0.039038103	0.623641437	0.719922021	FALSE
218	PF3D7_0301300.2o2_5567	-0.617934679	-0.66146435	0.310970077	-0.04352967	0.204551885	0.426342335	FALSE
219	PF3D7_0301400.2o2_4671	-0.411016328	-0.357331191	0.120737912	0.053685137	0.61506839	0.712077525	FALSE
220	PF3D7_0301500.2o2_6419	-0.60210648	-0.709813019	0.317910675	-0.107706539	0.195101617	0.425460158	FALSE
221	PF3D7_0301700.e1s1_8026	-0.177042971	-0.312961856	0.299667143	-0.135918885	0.220713837	0.43001912	FALSE
222	PF3D7_0301700.e2s1_8045	0.415318933	0.237342764	0.27322232	-0.177976169	0.262404877	0.452919237	FALSE
223	PF3D7_0301800.2o2_9014	-0.30239511	-0.465438795	0.353815201	-0.163043685	0.151671944	0.425460158	FALSE
224	PF3D7_0301900.1o1_7888	0.118033356	0.15541724	0.051970694	0.037383883	0.82811352	0.87822629	FALSE
225	PF3D7_0302000.iso1.exon2.amp1_158	-0.227490956	-0.367345972	0.337203086	-0.139855016	0.170660589	0.425460158	FALSE
226	PF3D7_0302200.1o9_6523	0.326383855	0.198572463	0.549176316	-0.127811392	0.032386881	0.425460158	FALSE
227	PF3D7_0302200.9o9_6812	-0.367909416	-0.434588188	0.375783987	-0.066678772	0.1292867	0.425460158	FALSE
228	PF3D7_0302200.e1_5952	0.844783349	0.749888376	0.291360666	-0.094894973	0.233215158	0.436247701	FALSE
229	PF3D7_0302200.e2_6826	-0.454316634	-0.510685404	0.180987422	-0.05636877	0.453102169	0.578982854	FALSE
230	PF3D7_0302200.e8_5663	-0.765353509	-0.838945561	0.282083874	-0.073592052	0.247816002	0.446457304	FALSE
231	PF3D7_0302200.e9_5390	-0.337725144	-0.460941874	0.338206806	-0.12321673	0.169460492	0.425460158	FALSE
232	PF3D7_0302500.e1s1_7185	0.915256108	0.738891051	0.555971941	-0.176365056	0.030564888	0.425460158	FALSE
233	PF3D7_0302500.e6s1_5136	-0.601859831	-0.67985484	0.176634022	-0.077995009	0.463864009	0.588796985	FALSE
234	PF3D7_0302500.e9s1_6314	0.267336356	0.084894848	0.431363145	-0.182441508	0.084822936	0.425460158	FALSE
235	PF3D7_0302800.e1s1_6041	0.491878805	0.226035949	0.361961996	-0.265842856	0.143019962	0.425460158	FALSE
236	PF3D7_0302900.e1s1_5473	-0.237570283	-0.405467387	0.529129357	-0.167897104	0.038368345	0.425460158	FALSE
237	PF3D7_0302900.e1s2_5184	0.144154514	-0.127902711	0.354501339	-0.272057226	0.150926861	0.425460158	FALSE
238	PF3D7_0303200.e2s1_6620	-0.624760349	-0.680150296	0.384895682	-0.055389947	0.120857209	0.425460158	FALSE
239	PF3D7_0303700.e1s1_6024	0.255194971	0.160218389	0.249534031	-0.094976582	0.304555813	0.478149217	FALSE
240	PF3D7_0303800.1o1_7036	-0.566483854	-0.543219506	0.107372303	0.023264348	0.654484005	0.744772027	FALSE
241	PF3D7_0304000.e4s1_5769	0.032627115	-0.131680917	0.533748871	-0.164308033	0.03690548	0.425460158	FALSE
242	PF3D7_0304100.1o1_7041	-0.379999188	-0.386078089	0.026911265	-0.006078902	0.910436823	0.94034502	FALSE
243	PF3D7_0304200.e1s1_8348	-0.160050415	-0.248607714	0.340350165	-0.088557299	0.166920872	0.425460158	FALSE
244	PF3D7_0304600_7131	-0.707068937	-0.317573207	1.023873999	0.389495729	0.000441247	0.425460158	FALSE
245	PF3D7_0305100.e1s3_8820	-0.729323845	-0.779341866	0.136441108	-0.050018021	0.570267532	0.672426476	FALSE
246	PF3D7_0305200.iso1.exon1.amp1_3725	-0.35917764	-0.527427207	0.390351271	-0.168249567	0.116037788	0.425460158	FALSE
247	PF3D7_0305200.iso1.exon1.amp2_4239	-0.251887814	-0.379225892	0.377729743	-0.127338078	0.127445933	0.425460158	FALSE
248	PF3D7_0305500.e1s3_9107	0.100290533	-0.30501337	0.405717526	-0.405303903	0.103339648	0.425460158	FALSE
249	PF3D7_0305600.1o1_7038	-0.129132138	-0.285274797	0.266270768	-0.156142659	0.274294907	0.461213957	FALSE
250	PF3D7_0306200.5o5_6140	0.465936579	0.334268592	0.262592957	-0.131667987	0.28074565	0.463883797	FALSE
251	PF3D7_0307300.1o1_7034	-0.350825781	-0.475699169	0.25519111	-0.124873387	0.294067104	0.471401893	FALSE
252	PF3D7_0307500.iso1.exon4.amp1_417	0.416223932	0.33493041	0.089460042	-0.081293522	0.708981361	0.788569511	FALSE
253	PF3D7_0307700.e3s2_7088	0.096924221	-0.112738456	0.32101317	-0.209662677	0.19099163	0.425460158	FALSE
254	PF3D7_0308000.1o1_8767	0.393287725	0.170943284	0.450622614	-0.222344441	0.072903784	0.425460158	FALSE
255	PF3D7_0308100.iso1.exon1.amp2_3062	-0.534657002	-0.609559464	0.200570701	-0.074902462	0.406624352	0.541140688	FALSE
256	PF3D7_0308300.e1s1_6328	-0.560217819	-0.675727186	0.386444153	-0.115509366	0.119472242	0.425460158	FALSE
257	PF3D7_0308700.iso1.exon1.amp1_2745	0.687491266	0.554485396	0.258062588	-0.13300587	0.28884522	0.46924797	FALSE
258	PF3D7_0308900.iso1.exon1.amp2_1908	-0.710279086	-0.76496848	0.425536594	-0.054689394	0.088752869	0.425460158	FALSE
259	PF3D7_0309000.iso1.exon1.amp1_144	0.18188231	-0.038788771	0.34786386	-0.220671081	0.158263362	0.425460158	FALSE
260	PF3D7_0309100.iso1.exon5.amp1_2930	-0.351685044	-0.357401293	0.041814701	-0.005716249	0.861287078	0.902484666	FALSE
261	PF3D7_0309200.iso1.exon3.amp2_2542	-0.573568895	-0.615227444	0.230302927	-0.041658549	0.342223841	0.498975674	FALSE
262	PF3D7_0309600.e1s1_5717	-0.850616739	-0.920410488	0.291365735	-0.069793748	0.233207365	0.436247701	FALSE
263	PF3D7_0309900.iso1.exon2.amp1_655	-0.426510363	-0.578256957	0.363497886	-0.151746595	0.141435915	0.425460158	FALSE
264	PF3D7_0310200.e1s3_7089	-0.462142352	-0.697014723	0.308716531	-0.234872372	0.207697228	0.427149287	FALSE
265	PF3D7_0310300.e1s1_6333	-0.294019076	-0.462804549	0.302610398	-0.168785473	0.216411933	0.43001912	FALSE
266	PF3D7_0310300.e1s2_6327	0.27651349	0.17109378	0.235809823	-0.10541971	0.331118304	0.493334604	FALSE
267	PF3D7_0310500.e1s1_7495	-0.610966092	-0.678063923	0.159801958	-0.067097832	0.506906838	0.619872121	FALSE
268	PF3D7_0310500.e1s2_7206	0.683484468	0.558275697	0.295483441	-0.125208771	0.226943433	0.432009087	FALSE
269	PF3D7_0310500.e1s3_8946	-0.052089047	-0.220426947	0.264416307	-0.1683379	0.277533647	0.46266608	FALSE
270	PF3D7_0310700.2o2_7252	-0.692094734	-0.867579168	0.519525789	-0.175484435	0.041582748	0.425460158	FALSE
271	PF3D7_0310800.1o1_6383	-0.840235179	-0.908116681	0.175755592	-0.067881501	0.466054225	0.59025115	FALSE
272	PF3D7_0310800_9158	0.085996864	0.143821069	0.16926667	0.057824205	0.482426038	0.602549047	FALSE
273	PF3D7_0311100.iso1.exon3.amp1_1794	0.124854332	0.055617705	0.317093517	-0.069236626	0.196195821	0.426118363	FALSE
274	PF3D7_0311400.iso1.exon1.amp1_2120	-0.012650428	-0.176315167	0.401866188	-0.163664739	0.106403972	0.425460158	FALSE
275	PF3D7_0311400.iso1.exon2.amp1_782	0.25055438	0.154616783	0.312691006	-0.095937597	0.202175452	0.426342335	FALSE
276	PF3D7_0311400.iso1.exon2.amp2_1071	0.031585891	-0.111473739	0.561411866	-0.14305963	0.029175928	0.425460158	FALSE
277	PF3D7_0311600.2o5_9087	-0.450622432	-0.575869198	0.449870014	-0.125246766	0.073340007	0.425460158	FALSE
278	PF3D7_0311700.1o15_9041	0.016477747	-0.130510329	0.31199338	-0.146988076	0.203136149	0.426342335	FALSE
279	PF3D7_0311800.e3_7124	-0.253422147	-0.346754624	0.222470244	-0.093332476	0.358462644	0.510140442	FALSE
280	PF3D7_0311900.1o1_5052	-0.538937163	-0.620031925	0.245548489	-0.081094762	0.31210624	0.481896358	FALSE
281	PF3D7_0312200.iso1.exon1.amp1_3720	-0.881771339	-0.935427584	0.343314438	-0.053656244	0.163460029	0.425460158	FALSE
282	PF3D7_0312300.1o1_7872	-0.625679279	-0.678593021	0.302360744	-0.052913742	0.21677426	0.43001912	FALSE
283	PF3D7_0312400.2o7_8753	0.489035998	0.643582938	0.206879407	0.15454694	0.392334367	0.532480913	FALSE
284	PF3D7_0313000.1o2_7579	0.206062857	0.002718482	0.341861939	-0.203344375	0.165148417	0.425460158	FALSE
285	PF3D7_0313100.1o4_8505	-0.306502047	-0.294907276	0.018820468	0.011594771	0.937290209	0.955301431	FALSE
286	PF3D7_0313200.1o1_9000	0.015376956	-0.118305544	0.343049811	-0.1336825	0.163766572	0.425460158	FALSE
287	PF3D7_0313300.iso1.exon5.amp1_931	-0.501732061	-0.634392186	0.390957188	-0.132660126	0.115512813	0.425460158	FALSE
288	PF3D7_0313400.iso1.exon1.amp1_445	-0.489030321	-0.6306292	0.717636059	-0.141598879	0.007322123	0.425460158	FALSE
289	PF3D7_0313600.5o6_7614	-0.518481655	-0.564648069	0.256030641	-0.046166414	0.292533294	0.470619313	FALSE
290	PF3D7_0313700.iso1.exon2.amp1_2360	-0.106390279	-0.165733583	0.19001137	-0.059343304	0.43128962	0.563482019	FALSE
291	PF3D7_0313800.5o5_7343	-0.004901094	-0.132060478	0.383828509	-0.127159384	0.121819648	0.425460158	FALSE
292	PF3D7_0315100.e1s1_7183	-0.594676213	-0.76540979	0.423303232	-0.170733577	0.090301121	0.425460158	FALSE
293	PF3D7_0315200.iso1.exon1.amp3_2789	-0.327294244	-0.442181461	0.338185887	-0.114887216	0.169485433	0.425460158	FALSE
294	PF3D7_0315400.1o1_8147	1.443055886	1.184389977	0.409582867	-0.258665908	0.100341333	0.425460158	FALSE
295	PF3D7_0315900.2o2_5837	-0.288992196	-0.385736139	0.245091812	-0.096743944	0.312979912	0.481896358	FALSE
296	PF3D7_0316300.1.e3_6827	-0.319536672	-0.448983074	0.376851599	-0.129446402	0.128273927	0.425460158	FALSE
297	PF3D7_0316500.e1s1_5735	0.382605524	0.300159938	0.226444031	-0.082445586	0.350159095	0.506106238	FALSE
298	PF3D7_0317200.iso1.exon1.amp1_4590	-0.428776527	-0.578397113	0.348675208	-0.149620586	0.157351054	0.425460158	FALSE
299	PF3D7_0317200.iso1.exon1.amp2_3936	-0.366832819	-0.536084025	0.321106526	-0.169251206	0.190869041	0.425460158	FALSE
300	PF3D7_0317300.s2_8011	-0.016995051	-0.095766901	0.18735087	-0.07877185	0.437650679	0.567347436	FALSE
301	PF3D7_0317300.s3_7150	0.83267424	0.738220622	0.198722843	-0.094453618	0.410873376	0.544722906	FALSE
302	PF3D7_0317400.iso1.exon1.amp1_643	-0.138878991	-0.270312761	0.333777606	-0.131433769	0.174808584	0.425460158	FALSE
303	PF3D7_0317400.iso1.exon2.amp1_3902	-0.452928767	-0.489671668	0.096866491	-0.0367429	0.686228724	0.768137861	FALSE
304	PF3D7_0317500.iso1.exon1.amp1_3396	0.184627065	0.050413328	0.332433152	-0.134213737	0.176458875	0.425460158	FALSE
305	PF3D7_0317500.iso1.exon2.amp1_942	-0.302867061	-0.340851483	0.167408474	-0.037984421	0.487176463	0.604979097	FALSE
306	PF3D7_0317700.e1s1_8247	-0.723791147	-0.659887979	0.179459291	0.063903168	0.456862194	0.582291633	FALSE
307	PF3D7_0317700.e9s1_9185	-0.188812465	-0.365288419	0.412042447	-0.176475954	0.098473034	0.425460158	FALSE
308	PF3D7_0317800.1o1_7265	-0.786573204	-0.878804088	0.310135035	-0.092230884	0.205712949	0.426342335	FALSE
309	PF3D7_0318200.e1s1_8532	-0.769080418	-0.991920688	0.500525388	-0.22284027	0.048684697	0.425460158	FALSE
310	PF3D7_0318200.e1s2_8534	-0.356673902	-0.548288601	0.287869804	-0.1916147	0.238629631	0.43934175	FALSE
311	PF3D7_0318200.e1s3_5066	0.333325432	0.320587429	0.018366205	-0.012738002	0.938800534	0.956192044	FALSE
312	PF3D7_0318500.iso1.exon1.amp3_2251	0.455901086	0.225155616	0.372700617	-0.230745471	0.13224975	0.425460158	FALSE
313	PF3D7_0318500.iso1.exon1.amp4_222	-0.351226368	-0.503939125	0.218852823	-0.152712757	0.366138054	0.515905076	FALSE
314	PF3D7_0318500.iso1.exon1.amp5_162	-0.433836217	-0.482488937	0.087693012	-0.04865272	0.714452782	0.792768342	FALSE
315	PF3D7_0318600.iso1.exon1.amp1_836	-0.245452638	-0.482446132	0.622691368	-0.236993493	0.017127977	0.425460158	FALSE
316	PF3D7_0318600.iso1.exon1.amp2_200	-0.263750137	-0.460112552	0.491058968	-0.196362415	0.052622787	0.425460158	FALSE
317	PF3D7_0319000.iso1.exon1.amp1_3432	-0.203087164	-0.381672142	0.244735764	-0.178584978	0.313662288	0.482186982	FALSE
318	PF3D7_0319100.1o1_7545	-0.567441031	-0.719130061	0.319494106	-0.15168903	0.192995235	0.425460158	FALSE
319	PF3D7_0319700.e1s1_5124	0.074857525	-0.081490434	0.378222275	-0.156347959	0.126983516	0.425460158	FALSE
320	PF3D7_0319900.1o1_4676	0.003948572	-0.073679132	0.205344579	-0.077627704	0.395780062	0.533160554	FALSE
321	PF3D7_0320200.iso1.exon1.amp1_3627	-0.068703586	-0.113204063	0.183236331	-0.044500477	0.447603408	0.574933558	FALSE
322	PF3D7_0320400.e1s3_6638	-0.38589291	-0.599269855	0.340155192	-0.213376945	0.167150596	0.425460158	FALSE
323	PF3D7_0320500.1o1_8174	0.407172301	0.302527432	0.227695666	-0.104644869	0.347571451	0.503924689	FALSE
324	PF3D7_0320800.e1s1_8898	-0.123381319	-0.378367109	0.478324421	-0.25498579	0.058377794	0.425460158	FALSE
325	PF3D7_0320800.e2s1_4867	-0.221830253	-0.40287578	0.368731364	-0.181045527	0.136148309	0.425460158	FALSE
326	PF3D7_0321500.iso1.exon1.amp1_841	-0.613051549	-0.639024633	0.163638329	-0.025973084	0.496898879	0.611815401	FALSE
327	PF3D7_0321600.e1_7117	-0.652627011	-0.719955853	0.29943089	-0.067328842	0.221062027	0.43001912	FALSE
328	PF3D7_0321800.iso1.exon1.amp1_234	-0.147701328	-0.252332059	0.3733512	-0.10463073	0.131619825	0.425460158	FALSE
329	PF3D7_0322100.1o1_9067	0.204950624	-0.009634081	0.30115503	-0.214584704	0.218530833	0.43001912	FALSE
330	PF3D7_0322900.e2_5953	-0.422397419	-0.440674027	0.059131562	-0.018276608	0.804918651	0.861118617	FALSE
331	PF3D7_0323300.1o1_6145	-0.571836743	-0.581021093	0.032804984	-0.009184351	0.890943625	0.927322169	FALSE
332	PF3D7_0323600.e1_5672	-0.346077016	-0.287044838	0.065523518	0.059032178	0.78437063	0.844614149	FALSE
333	PF3D7_0323800.e2s1_7381	0.142728901	-0.136415618	0.362556982	-0.279144519	0.142404569	0.425460158	FALSE
334	PF3D7_0324100.2o2_5248	-0.045621495	-0.149564175	0.182445024	-0.10394268	0.449533486	0.575516967	FALSE
335	PF3D7_0324400.iso1.exon2.amp1_1578	-0.093845033	-0.273144666	0.378227853	-0.179299633	0.126978288	0.425460158	FALSE
336	PF3D7_0324600.iso1.exon2.amp1_3003	0.96082735	0.624423484	0.336595621	-0.336403865	0.171390269	0.425460158	FALSE
337	PF3D7_0324800.iso1.exon2.amp1_2158	0.438821058	0.209114364	0.36213351	-0.229706694	0.142842338	0.425460158	FALSE
338	PF3D7_0324900.iso1.exon1.amp1_2456	0.951952037	0.767947489	0.509825127	-0.184004548	0.045080167	0.425460158	FALSE
339	PF3D7_0324900.iso1.exon2.amp1_2239	-0.182047857	-0.272605365	0.434990456	-0.090557508	0.082454521	0.425460158	FALSE
340	PF3D7_0400100.iso1.exon1.amp1_3682	-0.601938327	-0.595052162	0.029278199	0.006886165	0.902600501	0.936247896	FALSE
341	PF3D7_0400100.iso1.exon1.amp2_3971	-0.413159987	-0.523073638	0.465180472	-0.109913651	0.064909434	0.425460158	FALSE
342	PF3D7_0400100.iso1.exon1.amp3_4260	-0.573560928	-0.641654605	0.326546622	-0.068093676	0.183833953	0.425460158	FALSE
343	PF3D7_0400100.iso1.exon2.amp1_4192	0.318224216	0.066609521	0.546125534	-0.251614696	0.03323737	0.425460158	FALSE
344	PF3D7_0400200.iso1.exon1.amp1_1876	1.229909679	0.972002423	0.446203474	-0.257907256	0.075498639	0.425460158	FALSE
345	PF3D7_0400300.iso1.exon1.amp1_2731	-0.034321595	-0.346353324	0.33485563	-0.312031729	0.173494419	0.425460158	FALSE
346	PF3D7_0400400.iso1.exon1.amp1_1294	0.709342118	0.695798982	0.026730761	-0.013543136	0.911034829	0.94034502	FALSE
347	PF3D7_0400500.iso1.exon2.amp1_998	0.335569566	0.026083321	0.34817684	-0.309486245	0.15791092	0.425460158	FALSE
348	PF3D7_0400700.iso1.exon1.amp1_992	0.034309871	-0.21451665	0.394071456	-0.248826521	0.112846573	0.425460158	FALSE
349	PF3D7_0400800.iso1.exon1.amp1_3008	1.32212085	1.080664161	0.373270209	-0.241456688	0.131698105	0.425460158	FALSE
350	PF3D7_0400900.iso1.exon1.amp1_1573	0.231365804	0.05836981	0.602473388	-0.172995994	0.02045235	0.425460158	FALSE
351	PF3D7_0401000.iso1.exon1.amp1_2432	1.876986267	1.711086242	0.326100353	-0.165900025	0.184403079	0.425460158	FALSE
352	PF3D7_0401200.iso1.exon2.amp1_2164	0.354447474	0.083801438	0.494529274	-0.270646036	0.051146584	0.425460158	FALSE
353	PF3D7_0401300.iso1.exon2.amp1_3599	-0.004426981	-0.137127857	0.389089572	-0.132700876	0.117137498	0.425460158	FALSE
354	PF3D7_0401400.iso1.exon2.amp1_1862	0.293888664	0.028837721	0.511932704	-0.265050943	0.044298084	0.425460158	FALSE
355	PF3D7_0401600.iso2.exon3.amp1_3896	-0.52621406	-0.57633948	0.417653989	-0.05012542	0.094323478	0.425460158	FALSE
356	PF3D7_0401900.1o1_7666	-0.030337728	-0.103856772	0.213624457	-0.073519044	0.37742771	0.52339629	FALSE
357	PF3D7_0402000 (renamed)_9038	-0.195309816	-0.226309489	0.062388841	-0.030999673	0.794428158	0.853477607	FALSE
358	PF3D7_0402000.e1s1_9149	-0.303586408	-0.396949481	0.323257341	-0.093363073	0.1880622	0.425460158	FALSE
359	PF3D7_0402100.e2s1_6909	-0.483205481	-0.503734404	0.148820931	-0.020528923	0.536181354	0.644981775	FALSE
360	PF3D7_0402200 (renamed)_8951	-0.330613543	-0.325524988	0.024695081	0.005088555	0.917782689	0.944087217	FALSE
361	PF3D7_0402400.2o2_4672	0.244972596	0.114864477	0.351788739	-0.130108119	0.153890331	0.425460158	FALSE
362	PF3D7_0402600.iso1.exon1.amp1_4449	0.446696248	0.107753468	0.486077894	-0.33894278	0.05480948	0.425460158	FALSE
363	PF3D7_0403500.1o1_6443	-0.480416066	-0.607028827	0.248354342	-0.126612761	0.306776794	0.47887335	FALSE
364	PF3D7_0403900.iso1.exon1.amp1_1235	-0.350280069	-0.478181241	0.31778673	-0.127901172	0.19526727	0.425460158	FALSE
365	PF3D7_0404100.iso1.exon1.amp1_2815	-0.48967951	-0.558764455	0.166902444	-0.069084945	0.488474871	0.606054663	FALSE
366	PF3D7_0404100.iso1.exon2.amp1_674	-0.2635505	-0.372930719	0.433389735	-0.109380219	0.083492403	0.425460158	FALSE
367	PF3D7_0404200.iso1.exon2.amp1_2698	-0.630752506	-0.758292286	0.412234208	-0.12753978	0.098328652	0.425460158	FALSE
368	PF3D7_0404600.s3_7434	1.249736032	1.096108148	0.306460113	-0.153627884	0.210884763	0.429142182	FALSE
369	PF3D7_0404600.s5_7440	0.412571949	0.331017094	0.212718583	-0.081554855	0.379407321	0.524326332	FALSE
370	PF3D7_0404700.1o2_6213	-0.187890344	-0.309794504	0.458091536	-0.12190416	0.068698521	0.425460158	FALSE
371	PF3D7_0404800.1o2_6179	-0.471536694	-0.415898444	0.111703951	0.05563825	0.641586748	0.735278352	FALSE
372	PF3D7_0404800.e1_7407	-0.442300797	-0.369842572	0.129467738	0.072458225	0.589952957	0.690989178	FALSE
373	PF3D7_0405300.iso1.exon1.amp1_1116	0.59981128	0.370940675	0.499596894	-0.228870604	0.049058693	0.425460158	FALSE
374	PF3D7_0405300.iso1.exon1.amp2_3940	-0.134687842	-0.159336577	0.102666632	-0.024648735	0.668623338	0.754454664	FALSE
375	PF3D7_0405400.e2s1_6356	0.084633436	-0.113419343	0.525051589	-0.198052779	0.039704076	0.425460158	FALSE
376	PF3D7_0405400.e2s4_7512	-0.078081141	-0.32888174	0.338016573	-0.250800599	0.169687412	0.425460158	FALSE
377	PF3D7_0405600.2o9_6125	-0.40984858	-0.502327609	0.45795851	-0.092479029	0.068771481	0.425460158	FALSE
378	PF3D7_0405700.iso1.exon1.amp1_1975	0.223873512	0.047555519	0.299385827	-0.176317994	0.22112849	0.43001912	FALSE
379	PF3D7_0405700.iso1.exon1.amp3_181	-0.380792688	-0.464824821	0.247781102	-0.084032133	0.307860235	0.479404856	FALSE
380	PF3D7_0405900.e3s1_6875	-0.166553376	-0.269182357	0.812039403	-0.102628981	0.003090125	0.425460158	FALSE
381	PF3D7_0406200_8002	0.069393224	0.07209178	0.003752131	0.002698555	0.987484393	0.992713049	FALSE
382	PF3D7_0406500.iso1.exon2.amp4_169	-0.097775652	-0.05387164	0.068562754	0.043904012	0.774656655	0.839270625	FALSE
383	PF3D7_0406700.iso1.exon9.amp1_3850	-0.379330514	-0.558548082	0.416361758	-0.179217568	0.095265276	0.425460158	FALSE
384	PF3D7_0406800.iso1.exon3.amp1_3542	-0.2880129	-0.31266501	0.084679744	-0.02465211	0.723819923	0.7990516	FALSE
385	PF3D7_0406900.4o8_8241	-0.13049408	-0.279193185	0.308298686	-0.148699105	0.208284608	0.427495451	FALSE
386	PF3D7_0407000.1o1_5004	-0.449552715	-0.554040965	0.216026732	-0.10448825	0.372211675	0.518470708	FALSE
387	PF3D7_0407200.iso1.exon5.amp1_341	-0.044112469	-0.286840557	0.472204924	-0.242728088	0.061341136	0.425460158	FALSE
388	PF3D7_0407700.e2s1_5470	-0.779363786	-0.765475871	0.073029912	0.013887916	0.76044874	0.829534101	FALSE
389	PF3D7_0407700.e2s2_6343	0.563958269	0.444551822	0.324558012	-0.119406447	0.186380974	0.425460158	FALSE
390	PF3D7_0408000.iso1.exon1.amp1_683	-0.662224975	-0.692072859	0.280663481	-0.029847884	0.250111928	0.447266484	FALSE
391	PF3D7_0408600_7148	-0.382937149	-0.439868841	0.081613632	-0.056931692	0.733397845	0.806484596	FALSE
392	PF3D7_0408700.e3s1_8902	-0.128393627	-0.314747119	0.357833943	-0.186353492	0.147351087	0.425460158	FALSE
393	PF3D7_0408700.e5s1_7160	-0.694459064	-0.818620146	0.257370546	-0.124161081	0.290097453	0.469728718	FALSE
394	PF3D7_0408700.e6s1_5713	-0.503830691	-0.55343376	0.187670574	-0.049603069	0.436883193	0.566876665	FALSE
395	PF3D7_0408900.1.e3s1_7464	-0.390703751	-0.414111601	0.110590962	-0.023407851	0.644889594	0.73776843	FALSE
396	PF3D7_0409200.iso1.exon1.amp1_3910	-0.979882241	-1.065037063	0.382879859	-0.085154822	0.122680671	0.425460158	FALSE
397	PF3D7_0409500.2o2_7867	-0.092351612	-0.132417485	0.076299765	-0.040065873	0.750104128	0.821322279	FALSE
398	PF3D7_0409600.iso1.exon1.amp1_551	-0.130506375	-0.040195424	0.11407379	0.090310952	0.634579912	0.729545746	FALSE
399	PF3D7_0409600.iso1.exon1.amp2_1059	-0.266177049	-0.122945919	0.206284664	0.143231129	0.393667207	0.532615983	FALSE
400	PF3D7_0409900.7o7_7316	-0.461203312	-0.544778908	0.242560509	-0.083575596	0.317854394	0.485967132	FALSE
401	PF3D7_0410300.1o2_7946	0.430066457	0.250497776	0.309686365	-0.17956868	0.206338943	0.426342335	FALSE
402	PF3D7_0410500.iso1.exon1.amp1_4441	-0.740765358	-0.860686021	0.374386183	-0.119920663	0.130622928	0.425460158	FALSE
403	PF3D7_0410800.iso1.exon1.amp2_1340	0.471630155	0.190123982	0.343166973	-0.281506173	0.163630793	0.425460158	FALSE
404	PF3D7_0410900.1o1_6799	0.617251386	0.763250605	0.264680861	0.145999219	0.277069886	0.46266608	FALSE
405	PF3D7_0411000.iso1.exon1.amp1_3723	-0.1435566	-0.388817151	0.411368688	-0.24526055	0.098981789	0.425460158	FALSE
406	PF3D7_0411700.1o1_4939	-0.30043109	-0.322723525	0.199599973	-0.022292435	0.4088529	0.543071308	FALSE
407	PF3D7_0411900.iso1.exon1.amp1_724	-0.641956177	-0.675677649	0.180691388	-0.033721472	0.453829082	0.579215633	FALSE
408	PF3D7_0411900.iso1.exon2.amp2_seg2_2021	-1.013919463	-1.101265069	0.268534712	-0.087345606	0.270379278	0.459759548	FALSE
409	PF3D7_0412000.1o1_7937	0.162533906	-0.100192202	0.342192427	-0.262726108	0.164763005	0.425460158	FALSE
410	PF3D7_0412400.iso1.exon1.amp1_3330	-0.153493657	-0.311634967	0.497967361	-0.15814131	0.049721421	0.425460158	FALSE
411	PF3D7_0412400.iso1.exon2.amp2_3106	-0.735727512	-0.812002553	0.284099146	-0.076275041	0.244586151	0.443587434	FALSE
412	PF3D7_0412700.iso1.exon1.amp1_2752	0.354071428	0.150249363	0.434926334	-0.203822065	0.082495876	0.425460158	FALSE
413	PF3D7_0412700.iso1.exon2.amp2_1081	-0.415919913	-0.486603639	0.415574444	-0.070683725	0.095843096	0.425460158	FALSE
414	PF3D7_0412900.iso1.exon1.amp1_435	1.16976202	1.112307822	0.103290774	-0.057454198	0.666740409	0.753239366	FALSE
415	PF3D7_0412900.iso1.exon2.amp2_3385	-1.163141855	-1.513250827	0.641763424	-0.350108972	0.014469899	0.425460158	FALSE
416	PF3D7_0413200.iso1.exon1.amp1_2147	-0.052387606	-0.154983714	0.212771643	-0.102596107	0.379291178	0.524326332	FALSE
417	PF3D7_0413300.iso1.exon2.amp1_707	0.111944047	-0.07559928	0.52664826	-0.187543327	0.039176023	0.425460158	FALSE
418	PF3D7_0414000.e2s1_8062	-0.143757033	-0.231127468	0.449196611	-0.087370435	0.073732296	0.425460158	FALSE
419	PF3D7_0414700.1o1_7337	-0.237962256	-0.349212005	0.298253619	-0.111249749	0.222803489	0.430558913	FALSE
420	PF3D7_0414900.e4s1_5677	-0.403265113	-0.480695487	0.261412378	-0.077430374	0.282839976	0.465202053	FALSE
421	PF3D7_0415000.1o1_7877	-0.412473398	-0.57248926	0.385394972	-0.160015862	0.120409151	0.425460158	FALSE
422	PF3D7_0415100.iso1.exon1.amp1_2166	-0.205744701	-0.345751323	0.310505303	-0.140006622	0.205197476	0.426342335	FALSE
423	PF3D7_0415300.iso1.exon1.amp1_4554	-0.192449092	-0.356821689	0.627099329	-0.164372597	0.016475011	0.425460158	FALSE
424	PF3D7_0415300.iso1.exon1.amp2_3693	-0.064093201	-0.214878704	0.513328182	-0.150785503	0.043787131	0.425460158	FALSE
425	PF3D7_0415400.1o1_6387	-0.553006915	-0.63893139	0.332093935	-0.085924475	0.17687725	0.425460158	FALSE
426	PF3D7_0416300.iso1.exon1.amp2_462	-0.31758385	-0.350819919	0.122887822	-0.03323607	0.608835634	0.707784045	FALSE
427	PF3D7_0416400.iso1.exon2.amp1_1080	0.036665399	-0.020098247	0.092031597	-0.056763646	0.701048049	0.781798398	FALSE
428	PF3D7_0416400.iso1.exon2.amp2_3664	-0.497185367	-0.584396933	0.206631644	-0.087211566	0.39288925	0.532484992	FALSE
429	PF3D7_0416600.1o1_5263	-0.406351868	-0.444439564	0.210239547	-0.038087696	0.384860301	0.528217466	FALSE
430	PF3D7_0416900.iso1.exon2.amp2_seg1_2886	-0.625064973	-0.659896626	0.165696369	-0.034831652	0.491577693	0.608289431	FALSE
431	PF3D7_0417100.1o4_5878	0.154253953	-0.067573578	0.586334607	-0.22182753	0.023536895	0.425460158	FALSE
432	PF3D7_0417400.iso1.exon1.amp4_seg2_2328	0.746683539	0.475098156	0.37239057	-0.271585383	0.132550846	0.425460158	FALSE
433	PF3D7_0417400.iso1.exon1.amp6_seg1_1730	-0.516262104	-0.546406875	0.07155717	-0.030144771	0.765123392	0.833167375	FALSE
434	PF3D7_0418000.6o10_5641	-0.53144314	-0.617775942	0.212204209	-0.086332801	0.380534479	0.524591288	FALSE
435	PF3D7_0418000.7o10_5069	-0.782649003	-0.846932537	0.157754939	-0.064283534	0.512293836	0.623739434	FALSE
436	PF3D7_0418800.iso1.exon4.amp1_2929	-0.551683726	-0.676093055	0.359775372	-0.124409328	0.145300718	0.425460158	FALSE
437	PF3D7_0419100.iso1.exon1.amp1_2401	-0.572804194	-0.581366065	0.01922497	-0.008561871	0.935945536	0.955301431	FALSE
438	PF3D7_0419200.1o1_6384	-0.92182301	-1.068704684	0.298277227	-0.146881674	0.222768461	0.430558913	FALSE
439	PF3D7_0419300.iso1.exon1.amp1_2162	-0.072696269	-0.198503952	0.48461944	-0.125807682	0.05546519	0.425460158	FALSE
440	PF3D7_0419400.2o4_8826	-0.402599772	-0.500921116	0.222965883	-0.098321344	0.357419649	0.510027836	FALSE
441	PF3D7_0419400.3o4_9115	-0.461577644	-0.561196587	0.332866469	-0.099618943	0.175925609	0.425460158	FALSE
442	PF3D7_0419400.4o4_8537	-0.678817544	-0.771878822	0.21344999	-0.093061278	0.377808434	0.523450765	FALSE
443	PF3D7_0419500.1o1_5301	-0.28407788	-0.273078088	0.043590294	0.010999792	0.855466095	0.8983996	FALSE
444	PF3D7_0419700.1o1_8146	0.131975868	-0.084362986	0.401699429	-0.216338854	0.106538409	0.425460158	FALSE
445	PF3D7_0419900.iso1.exon3.amp1_2826	-0.281867587	-0.457897503	0.244973975	-0.176029915	0.313205632	0.481896358	FALSE
446	PF3D7_0419900.iso1.exon3.amp5_seg1_2006	-0.630148004	-0.668730889	0.176712908	-0.038582885	0.463667628	0.588796985	FALSE
447	PF3D7_0420000.s2_5994	-0.337822667	-0.434049505	0.312751265	-0.096226838	0.20209264	0.426342335	FALSE
448	PF3D7_0420300.iso1.exon1.amp1_521	0.023141801	-0.156777907	0.288726169	-0.179919708	0.237292498	0.438030391	FALSE
449	PF3D7_0420300.iso1.exon1.amp3_1099	-0.412264225	-0.603006291	0.263544689	-0.190742066	0.279065666	0.462832299	FALSE
450	PF3D7_0420300.iso1.exon1.amp4_seg1_3445	0.187172725	-0.091144683	0.378584765	-0.278317408	0.126644099	0.425460158	FALSE
451	PF3D7_0420600.iso1.exon1.amp1_2477	-0.457272188	-0.465318129	0.027271537	-0.008045942	0.909243419	0.939807314	FALSE
452	PF3D7_0420700.e2s1_8336	1.455833529	1.348796649	0.393509594	-0.10703688	0.113323662	0.425460158	FALSE
453	PF3D7_0420900.iso1.exon1.amp1_4190	0.084792151	-0.079948589	0.384092385	-0.164740739	0.121581064	0.425460158	FALSE
454	PF3D7_0421200.iso1.exon2.amp1_3312	0.282325528	0.128051242	0.263861052	-0.154274286	0.27850888	0.462832299	FALSE
455	PF3D7_0421300.iso1.exon1.amp1_2739	0.733768452	0.484229578	0.465155409	-0.249538874	0.064922493	0.425460158	FALSE
456	PF3D7_0421800.iso1.exon1.amp1_1236	-0.443776637	-0.465020417	0.126472781	-0.021243781	0.598511267	0.699552143	FALSE
457	PF3D7_0422000.5o5_7285	0.063683752	-0.084503283	0.30511289	-0.148187035	0.212806234	0.43001912	FALSE
458	PF3D7_0422100 (renamed)_7011	1.850625338	1.608877387	0.331779115	-0.241747951	0.177266256	0.425460158	FALSE
459	PF3D7_0422200.iso1.exon1.amp4_2550	-0.078608215	-0.185367991	0.275997156	-0.106759776	0.257768551	0.450960176	FALSE
460	PF3D7_0422300.e3s1_6907	-0.086854436	-0.136568085	0.307098981	-0.049713649	0.209978373	0.428257891	FALSE
461	PF3D7_0422400.e2s1_5434	-0.288342761	-0.423419348	0.391522339	-0.135076587	0.115024994	0.425460158	FALSE
462	PF3D7_0422500.e1s2_8254	-0.553196248	-0.698620013	0.309816028	-0.145423765	0.20615788	0.426342335	FALSE
463	PF3D7_0422500.e1s3_5652	-0.03280391	-0.043909001	0.039028402	-0.011105092	0.870437946	0.909693627	FALSE
464	PF3D7_0422700.e1s1_4878	-0.199781999	-0.345117443	0.365137735	-0.145335444	0.139760891	0.425460158	FALSE
465	PF3D7_0423100.iso1.exon1.amp1_3832	-0.662018335	-0.81043403	0.403930316	-0.148415695	0.104752015	0.425460158	FALSE
466	PF3D7_0423400.1o1_7833	-0.255712224	-0.338151856	0.165374287	-0.082439632	0.492408251	0.608492327	FALSE
467	PF3D7_0423700.1o1_6673	0.879136034	0.780428227	0.34193404	-0.098707807	0.165064271	0.425460158	FALSE
468	PF3D7_0424200.iso1.exon1.amp2_2772	-0.191763811	-0.396141201	0.38224122	-0.204377391	0.123263232	0.425460158	FALSE
469	PF3D7_0424600.e2s1_8623	-0.00638	-0.192258866	0.44086101	-0.185878866	0.078745066	0.425460158	FALSE
470	PF3D7_0424800.2o2_6416	0.057576726	-0.083831792	0.426188022	-0.141408518	0.088305686	0.425460158	FALSE
471	PF3D7_0425100.2o2_8127	0.683825236	0.497608363	0.583809562	-0.186216873	0.024057607	0.425460158	FALSE
472	PF3D7_0425200.2o2_5531	-0.186019547	-0.321367085	0.314546758	-0.135347538	0.199637472	0.426342335	FALSE
473	PF3D7_0425300.1o1_8130	-0.361637858	-0.455742911	0.319946118	-0.094105053	0.192397291	0.425460158	FALSE
474	PF3D7_0425500.iso1.exon1.amp1_1565	0.907801433	0.551198177	0.519354685	-0.356603256	0.041642209	0.425460158	FALSE
475	PF3D7_0425700.iso1.exon1.amp1_4168	0.487794661	0.225485811	0.369004504	-0.26230885	0.135876969	0.425460158	FALSE
476	PF3D7_0425800.iso1.exon1.amp1_3955	-0.582574406	-0.67424273	0.330903637	-0.091668324	0.178351687	0.425460158	FALSE
477	PF3D7_0425800.iso1.exon1.amp2_4244	-0.747347606	-0.831377373	0.323886192	-0.084029767	0.18724784	0.425460158	FALSE
478	PF3D7_0425800.iso1.exon2.amp1_4183	1.185387757	1.161733518	0.061214325	-0.023654239	0.798206285	0.856552018	FALSE
479	PF3D7_0425900.iso1.exon2.amp1_4457	-0.272075737	-0.428328875	0.266523517	-0.156253138	0.273855679	0.461213957	FALSE
480	PF3D7_0426000.iso1.exon1.amp1_4198	-0.31544095	-0.443335994	0.529244915	-0.127895044	0.038331106	0.425460158	FALSE
481	PF3D7_0500100.iso1.exon1.amp1_2232	-0.588697567	-0.711544607	0.480830995	-0.12284704	0.057201837	0.425460158	FALSE
482	PF3D7_0500100.iso1.exon2.amp1_1299	1.24314456	0.998854438	0.520331636	-0.244290122	0.041303759	0.425460158	FALSE
483	PF3D7_0500400.iso1.exon1.amp1_3882	0.808018933	0.451562632	0.391958594	-0.356456301	0.114649642	0.425460158	FALSE
484	PF3D7_0500500.iso1.exon1.amp1_2721	1.116000735	0.869706751	0.417573085	-0.246293983	0.094382203	0.425460158	FALSE
485	PF3D7_0500800.e1s1_7120	-0.309049769	-0.357393908	0.140837948	-0.048344139	0.558033164	0.660779136	FALSE
486	PF3D7_0500800.e2s1_8081	-0.389583416	-0.562986567	0.302610476	-0.173403151	0.21641182	0.43001912	FALSE
487	PF3D7_0500900.iso1.exon2.amp1_442	0.148993035	0.103592106	0.145099385	-0.045400929	0.546309707	0.651852093	FALSE
488	PF3D7_0501000.e1s1_4842	-0.397934802	-0.410604909	0.066993885	-0.012670107	0.779666372	0.841811516	FALSE
489	PF3D7_0501000.e2s1_5152	-0.136262496	-0.266796137	0.321538526	-0.130533641	0.190302594	0.425460158	FALSE
490	PF3D7_0501100.1.e3s1_7453	0.062754351	-0.006819442	0.352164199	-0.069573792	0.153477294	0.425460158	FALSE
491	PF3D7_0501100.1.e4s1_6302	-0.690233111	-0.839853843	0.48387375	-0.149620731	0.05580319	0.425460158	FALSE
492	PF3D7_0501100.iso2.exon3.amp1_2407	-0.499911785	-0.552683306	0.264315066	-0.052771521	0.277711274	0.462670373	FALSE
493	PF3D7_0501200.e2_7703	-0.108183286	-0.200972157	0.19838202	-0.09278887	0.411660203	0.545250453	FALSE
494	PF3D7_0501500.e1s1_8931	-0.535988601	-0.695216801	0.405060793	-0.1592282	0.103856713	0.425460158	FALSE
495	PF3D7_0501600.e1s1_8642	-0.430266113	-0.615321281	0.425196475	-0.185055167	0.088987139	0.425460158	FALSE
496	PF3D7_0501800.e1s1_4880	0.514460377	0.476678226	0.077432561	-0.037782151	0.746531658	0.818324773	FALSE
497	PF3D7_0501800.e1s2_6042	0.135895727	0.25370392	0.188965533	0.117808193	0.433783142	0.565208146	FALSE
498	PF3D7_0501900.iso1.exon2.amp1_2980	-0.60451046	-0.798112128	0.365983781	-0.193601669	0.138903222	0.425460158	FALSE
499	PF3D7_0502000.iso1.exon2.amp1_1211	-0.137361254	-0.341997539	0.405743599	-0.204636285	0.103319166	0.425460158	FALSE
500	PF3D7_0502200.2o2_5863	-0.291354281	-0.440586127	0.434547339	-0.149231846	0.082740685	0.425460158	FALSE
501	PF3D7_0502400.1o1_5886	0.969346603	0.705347814	0.330543351	-0.263998789	0.178799939	0.425460158	FALSE
502	PF3D7_0502700.iso1.exon2.amp1_3857	0.556693217	0.426626746	0.203648116	-0.130066471	0.399611747	0.535617274	FALSE
503	PF3D7_0502800.1o1_6679	-0.781105933	-0.88004689	0.346697501	-0.098940958	0.159582499	0.425460158	FALSE
504	PF3D7_0503000.5o5_8733	-0.964341614	-1.060589365	0.345235112	-0.09624775	0.161249234	0.425460158	FALSE
505	PF3D7_0503600.e1s1_5436	-0.275590315	-0.349881938	0.447208001	-0.074291623	0.074901684	0.425460158	FALSE
506	PF3D7_0503600.e7s1_7736	-0.552884028	-0.612654863	0.18637091	-0.059770836	0.440008455	0.568933449	FALSE
507	PF3D7_0503900.2o2_5032	-0.2539306	-0.397208421	0.259798736	-0.143277822	0.285721187	0.467601669	FALSE
508	PF3D7_0504200.2o3_7328	-0.481112771	-0.578422186	0.342273602	-0.097309414	0.164668452	0.425460158	FALSE
509	PF3D7_0504400.iso1.exon1.amp1_2757	-0.641170124	-0.796104207	0.415085699	-0.154934082	0.096203328	0.425460158	FALSE
510	PF3D7_0504500.5o6_9016	-0.123684353	-0.207633878	0.233073324	-0.083949526	0.336604786	0.495994122	FALSE
511	PF3D7_0504600_5397	-0.32472229	-0.431876022	0.311921261	-0.107153732	0.20323567	0.426342335	FALSE
512	PF3D7_0504800.iso1.exon1.amp1_1378	0.043498802	-0.068660455	0.333976178	-0.112159257	0.174565908	0.425460158	FALSE
513	PF3D7_0504800.iso1.exon1.amp2_1667	-0.710631674	-0.684824409	0.041436644	0.025807265	0.862527547	0.903109501	FALSE
514	PF3D7_0505100.iso1.exon1.amp1_1083	-0.034615274	-0.248639487	0.369712375	-0.214024213	0.135175879	0.425460158	FALSE
515	PF3D7_0505100.iso1.exon1.amp2_3685	-0.245860346	-0.364654603	0.322878124	-0.118794256	0.188554659	0.425460158	FALSE
516	PF3D7_0505100.iso1.exon2.amp1_507	-0.36383604	-0.491051571	0.202286945	-0.12721553	0.402703663	0.53825739	FALSE
517	PF3D7_0505100.iso1.exon2.amp2_1332	-0.113864616	-0.259562542	0.210907938	-0.145697926	0.383384962	0.527662564	FALSE
518	PF3D7_0505200.e1s1_6332	-0.417534045	-0.605092472	0.314636398	-0.187558427	0.199515523	0.426342335	FALSE
519	PF3D7_0505400.1o1_4753	-0.704721276	-0.767353128	0.339648984	-0.062631852	0.167748235	0.425460158	FALSE
520	PF3D7_0505500.e1s1_4811	0.080967969	0.091728512	0.023569595	0.010760543	0.921516252	0.947188992	FALSE
521	PF3D7_0505500.e2_6247	-0.102581312	-0.338631115	0.469303287	-0.236049803	0.062793124	0.425460158	FALSE
522	PF3D7_0506200.1o1_7857	0.089340915	-0.050178551	0.277024859	-0.139519466	0.256067218	0.450960176	FALSE
523	PF3D7_0506300.iso1.exon1.amp1_3900	0.831777454	0.666449352	0.489150208	-0.165328102	0.053451177	0.425460158	FALSE
524	PF3D7_0506800.e1_6284	-0.653051177	-0.749708724	0.413535527	-0.096657547	0.097353711	0.425460158	FALSE
525	PF3D7_0506900.1o1_6208	-0.784354175	-0.883074039	0.400568791	-0.098719863	0.107453778	0.425460158	FALSE
526	PF3D7_0507200.iso1.exon1.amp1_150	-0.086843299	-0.221284957	0.274707614	-0.134441657	0.259915423	0.451636845	FALSE
527	PF3D7_0507300 (plasmodb revised)_5405	0.131074751	0.020567974	0.248438937	-0.110506776	0.30661714	0.47887335	FALSE
528	PF3D7_0507700.e1s1_5454	-0.409745393	-0.533245599	0.595094055	-0.123500206	0.021811916	0.425460158	FALSE
529	PF3D7_0507900.iso1.exon2.amp1_43	-0.429318294	-0.606306479	0.481588504	-0.176988185	0.056850697	0.425460158	FALSE
530	PF3D7_0508000.1o1_6429	-0.094037513	-0.174826568	0.274036256	-0.080789056	0.26103845	0.452660367	FALSE
531	PF3D7_0508400.4o4_6424	-0.538120117	-0.490063442	0.106402617	0.048056676	0.657386859	0.747187982	FALSE
532	PF3D7_0508500.s3_4828	-0.63553192	-0.785936538	0.256439683	-0.150404617	0.291788105	0.470619313	FALSE
533	PF3D7_0508600.iso1.exon1.amp1_3875	0.048609425	-0.048025245	0.256566304	-0.09663467	0.291557711	0.470619313	FALSE
534	PF3D7_0508900.iso1.exon1.amp1_1678	-0.807448023	-0.81520345	0.044897831	-0.007755427	0.851185011	0.895916956	FALSE
535	PF3D7_0508900.iso1.exon1.amp2_1967	-0.212032595	-0.234953513	0.06157428	-0.022920918	0.797047846	0.855636355	FALSE
536	PF3D7_0508900.iso1.exon1.amp4_4215	-0.465469769	-0.480285926	0.068442928	-0.014816157	0.775038927	0.839270625	FALSE
537	PF3D7_0509000.e5s1_6290	0.099421263	-0.022429021	0.392534015	-0.121850284	0.114156159	0.425460158	FALSE
538	PF3D7_0509100.iso1.exon1.amp1_2855	-0.023849406	-0.249731061	0.310590192	-0.225881655	0.205079442	0.426342335	FALSE
539	PF3D7_0509100.iso1.exon1.amp2_3351	-0.419611961	-0.590721987	0.372501414	-0.171110026	0.132443136	0.425460158	FALSE
540	PF3D7_0509200.iso1.exon4.amp1_392	-0.17855783	-0.281829633	0.207441098	-0.103271803	0.391078337	0.531033248	FALSE
541	PF3D7_0509500.1o1_6441	-0.283182596	-0.286081908	0.012694009	-0.002899312	0.95767764	0.970132985	FALSE
542	PF3D7_0509600.2o2_7637	-0.296296342	-0.475124481	0.316496912	-0.178828139	0.196997788	0.426223692	FALSE
543	PF3D7_0509700.e4s1_9186	-0.413534922	-0.409931407	0.018839218	0.003603514	0.937227873	0.955301431	FALSE
544	PF3D7_0509800.2o4_8246	-0.547915196	-0.659657973	0.23777519	-0.111742777	0.32721698	0.492172202	FALSE
545	PF3D7_0509900.iso1.exon1.amp1_3597	0.010469475	-0.138862254	0.33960986	-0.149331728	0.167794499	0.425460158	FALSE
546	PF3D7_0510100.iso1.exon1.amp2_4582	-0.17711599	-0.411836487	0.364969315	-0.234720497	0.139932154	0.425460158	FALSE
547	PF3D7_0510100.iso1.exon1.amp3_1915	-0.119543093	-0.373792028	0.342725736	-0.254248936	0.164142621	0.425460158	FALSE
548	PF3D7_0510400.1o1_8464	-0.20887117	-0.27390405	0.237321378	-0.06503288	0.328114914	0.492393447	FALSE
549	PF3D7_0510800.1o1_4938	-0.088399286	-0.290478651	0.407639758	-0.202079365	0.101839017	0.425460158	FALSE
550	PF3D7_0511100.iso1.exon2.amp1_1537	-0.284091903	-0.411904012	0.552464884	-0.127812109	0.031492867	0.425460158	FALSE
551	PF3D7_0511300.iso1.exon1.amp1_2538	-0.259511318	-0.433324663	0.26239069	-0.173813344	0.281103652	0.46420179	FALSE
552	PF3D7_0511400.1o1_4698	-0.052614334	-0.116777863	0.265881761	-0.064163529	0.27497195	0.46182388	FALSE
553	PF3D7_0511400_8865	0.340751878	0.226214157	0.267146228	-0.114537721	0.272775764	0.460421317	FALSE
554	PF3D7_0511500.s1_7710	-0.47076605	-0.523644701	0.123439224	-0.052878652	0.607242024	0.706810558	FALSE
555	PF3D7_0511500.s3_7138	-0.050059752	-0.178008948	0.237934582	-0.127949197	0.326902013	0.492019991	FALSE
556	PF3D7_0511500.s4_7427	-0.766781812	-0.778699153	0.046365203	-0.011917341	0.846386298	0.891535379	FALSE
557	PF3D7_0511600.1o1_5809	-0.122583429	-0.279928714	0.234635099	-0.157345285	0.333465773	0.494515987	FALSE
558	PF3D7_0512100.iso1.exon2.amp1_3546	-0.72976342	-0.754623957	0.076665379	-0.024860538	0.748950456	0.820655365	FALSE
559	PF3D7_0512600.e6s1_7173	-0.114800689	-0.156123447	0.362791108	-0.041322758	0.142163021	0.425460158	FALSE
560	PF3D7_0512900.iso1.exon1.amp1_3002	-0.889000229	-0.907506098	0.088443507	-0.018505868	0.712126979	0.790813485	FALSE
561	PF3D7_0513000.e1s1_5733	-0.327082662	-0.39518425	0.182733929	-0.068101588	0.448828222	0.575060574	FALSE
562	PF3D7_0513100.2o3_7569	-0.345781996	-0.416171332	0.145519679	-0.070389335	0.545160699	0.651136598	FALSE
563	PF3D7_0513200.e2s3_5488	-0.046908657	-0.050894603	0.00658566	-0.003985947	0.978034921	0.986123668	FALSE
564	PF3D7_0513300.e1s1_8334	-0.434362174	-0.541430308	0.300122945	-0.107068134	0.220043288	0.43001912	FALSE
565	PF3D7_0513400.iso1.exon2.amp1_92	-0.317762713	-0.478425683	0.381787194	-0.16066297	0.12367882	0.425460158	FALSE
566	PF3D7_0513700.e3s1_8904	-0.718065948	-0.816849423	0.29709818	-0.098783475	0.224523043	0.431112685	FALSE
567	PF3D7_0514000.iso1.exon2.amp1_129	-0.213943236	-0.131691985	0.286666057	0.082251251	0.240518957	0.44021877	FALSE
568	PF3D7_0514100.iso1.exon1.amp2_3648	-0.336997944	-0.393264604	0.213435369	-0.056266659	0.377840352	0.523450765	FALSE
569	PF3D7_0514600.iso1.exon2.amp1_2392	-0.404567912	-0.538573038	0.325748575	-0.134005125	0.184852701	0.425460158	FALSE
570	PF3D7_0514900.1o1_8458	-0.673271492	-0.762654703	0.393397447	-0.089383212	0.113419096	0.425460158	FALSE
571	PF3D7_0516000.iso1.exon1.amp1_2533	-0.438049293	-0.486215748	0.233066781	-0.048166455	0.33661798	0.495994122	FALSE
572	PF3D7_0516400.1o1_9029	0.460530187	0.197431998	0.380411516	-0.263098189	0.124945316	0.425460158	FALSE
573	PF3D7_0516500.5o6_7013	-0.476657593	-0.546023702	0.166395987	-0.06936611	0.489776409	0.60686392	FALSE
574	PF3D7_0516600.s1_6862	-0.255411904	-0.178177833	0.209537343	0.077234071	0.386414346	0.528308997	FALSE
575	PF3D7_0516600.s2_5122	-0.399292451	-0.461382619	0.29884834	-0.062090168	0.221922422	0.430339192	FALSE
576	PF3D7_0516800.iso1.exon1.amp2_530	-0.398631143	-0.519476179	0.276440258	-0.120845036	0.257033964	0.450960176	FALSE
577	PF3D7_0516800.iso1.exon1.amp3_1048	-0.526762503	-0.566589863	0.132209488	-0.039827361	0.582172469	0.683017408	FALSE
578	PF3D7_0517600.1o1_7287	0.139647813	-0.1332651	0.554844075	-0.272912913	0.0308605	0.425460158	FALSE
579	PF3D7_0517700_5368	-0.303802635	-0.383857367	0.225585494	-0.080054732	0.351941728	0.507269912	FALSE
580	PF3D7_0517900.2o2_7334	-0.170972799	-0.304202587	0.331110722	-0.133229788	0.178094455	0.425460158	FALSE
581	PF3D7_0518400.iso1.exon1.amp1_4147	-0.67578513	-0.771119122	0.322569309	-0.095333992	0.188956459	0.425460158	FALSE
582	PF3D7_0518600.iso1.exon1.amp1_1407	-0.133761194	-0.39326567	0.503452271	-0.259504475	0.047522754	0.425460158	FALSE
583	PF3D7_0518600.iso1.exon1.amp2_1924	-0.38500229	-0.500617306	0.40867306	-0.115615016	0.101040185	0.425460158	FALSE
584	PF3D7_0518700.e1s1_5478	-0.304774718	-0.391198115	0.210762556	-0.086423396	0.383705542	0.527662564	FALSE
585	PF3D7_0518700.e3s1_8039	-0.544496248	-0.632931509	0.318720126	-0.088435261	0.194022549	0.425460158	FALSE
586	PF3D7_0518800.iso1.exon7.amp1_2109	0.080169049	-0.075428861	0.332038682	-0.155597909	0.176945473	0.425460158	FALSE
587	PF3D7_0518900.iso1.exon1.amp1_2982	-0.44819177	-0.567288623	0.326699003	-0.119096853	0.183639947	0.425460158	FALSE
588	PF3D7_0519000.iso1.exon1.amp1_4167	-0.425730819	-0.498693223	0.321586215	-0.072962404	0.190240145	0.425460158	FALSE
589	PF3D7_0519100.iso1.exon1.amp1_673	-0.352915138	-0.391026581	0.222600758	-0.038111443	0.358187794	0.510140442	FALSE
590	PF3D7_0519200.e2s1_5387	-0.259522713	-0.367880614	0.212566547	-0.108357901	0.379740249	0.524340108	FALSE
591	PF3D7_0519300.1o1_9072	-0.701722313	-0.713493303	0.075579114	-0.01177099	0.752379876	0.823106595	FALSE
592	PF3D7_0519900.1o1_7902	-0.999293352	-1.145522012	0.26791826	-0.14622866	0.271441309	0.460421317	FALSE
593	PF3D7_0520000.e3s1_9191	-0.54876187	-0.627163761	0.254836451	-0.078401892	0.294716823	0.47141242	FALSE
594	PF3D7_0520100.e1s1_8338	0.201003558	0.053007996	0.327318768	-0.147995562	0.182852586	0.425460158	FALSE
595	PF3D7_0520400.e1s1_6896	0.329870001	0.206969974	0.403024404	-0.122900028	0.105474282	0.425460158	FALSE
596	PF3D7_0521200.iso1.exon1.amp1_717	-0.455500238	-0.5987688	0.291457487	-0.143268561	0.233066349	0.436247701	FALSE
597	PF3D7_0521300.iso1.exon3.amp1_2837	-0.799546389	-0.863117375	0.117664055	-0.063570986	0.624032522	0.719935117	FALSE
598	PF3D7_0521300.iso1.exon3.amp2_seg2_577	-0.272334159	-0.323413441	0.189367289	-0.051079281	0.432824187	0.564220837	FALSE
599	PF3D7_0521400.1o1_8497	0.160635103	0.145648517	0.021826757	-0.014986586	0.927301444	0.950308597	FALSE
600	PF3D7_0521600.iso1.exon1.amp1_1810	-0.301850913	-0.456811667	0.250333981	-0.154960754	0.303056397	0.477289267	FALSE
601	PF3D7_0521700.e1s1_9110	-0.460762875	-0.547716674	0.3059267	-0.086953799	0.2116439	0.43001912	FALSE
602	PF3D7_0521800.iso1.exon1.amp1_1519	-0.590222177	-0.785219375	0.505140613	-0.194997198	0.046864102	0.425460158	FALSE
603	PF3D7_0522400.e3s3_9155	-0.156248819	-0.255794414	0.23142488	-0.099545596	0.339940405	0.498271247	FALSE
604	PF3D7_0522400.e4s2_8874	-0.086434262	-0.190054327	0.245886454	-0.103620065	0.311460805	0.48144217	FALSE
605	PF3D7_0522400.e4s3_7140	-0.321466796	-0.373309849	0.139039134	-0.051843053	0.563021582	0.665727123	FALSE
606	PF3D7_0522500.iso1.exon1.amp1_2655	-0.336349784	-0.473054473	0.442055219	-0.136704689	0.078008829	0.425460158	FALSE
607	PF3D7_0523100.e2s1_7775	-0.513548061	-0.613180786	0.358710827	-0.099632725	0.146422032	0.425460158	FALSE
608	PF3D7_0523400.3o3_6752	-0.240997353	-0.236499772	0.014287559	0.004497581	0.952371181	0.967203474	FALSE
609	PF3D7_0523800.1o1_7352	-0.594465996	-0.815242786	0.30447744	-0.22077679	0.213717311	0.43001912	FALSE
610	PF3D7_0524100.iso1.exon1.amp1_509	-0.096513817	-0.166994649	0.166969909	-0.070480831	0.488301646	0.606054663	FALSE
611	PF3D7_0524100.iso1.exon1.amp2_798	-0.501607134	-0.561038402	0.17897007	-0.059431268	0.45806997	0.583300724	FALSE
612	PF3D7_0524200.iso1.exon1.amp1_3223	-0.247956921	-0.385085606	0.404518432	-0.137128685	0.104285416	0.425460158	FALSE
613	PF3D7_0524300.1o1_8762	-0.45917392	-0.557595357	0.342617857	-0.098421438	0.164267959	0.425460158	FALSE
614	PF3D7_0524400.e1s1_7190	-0.268052227	-0.36925716	0.26972296	-0.101204933	0.268340918	0.457828787	FALSE
615	PF3D7_0524500.1o1_5233	-0.198830286	-0.342975645	0.182761657	-0.144145359	0.448760569	0.575060574	FALSE
616	PF3D7_0524700.1o1_6961	-0.577174255	-0.668717468	0.27326857	-0.091543213	0.262327089	0.452919237	FALSE
617	PF3D7_0524700_8580	-0.799787	-0.963481266	0.371279409	-0.163694266	0.133634685	0.425460158	FALSE
618	PF3D7_0524800.iso1.exon1.amp1_2188	0.356558412	0.191036181	0.412919391	-0.16552223	0.097814263	0.425460158	FALSE
619	PF3D7_0525000.1o1_7931	-0.384864096	-0.529281962	0.330521586	-0.144417867	0.178827048	0.425460158	FALSE
620	PF3D7_0525100.e1s1_4897	-0.318626368	-0.421999378	0.323707429	-0.10337301	0.187479048	0.425460158	FALSE
621	PF3D7_0525200.iso1.exon1.amp2_3987	-0.423804549	-0.452376856	0.077900958	-0.028572307	0.745056215	0.81734649	FALSE
622	PF3D7_0525300.1o1_6447	0.091664926	-0.098643066	0.276266178	-0.190307992	0.257322369	0.450960176	FALSE
623	PF3D7_0525800.e1s1_6607	0.190822097	0.214963897	0.082921055	0.0241418	0.729308071	0.802897461	FALSE
624	PF3D7_0526200.iso2.exon7.amp1_2452	0.767791758	0.65616578	0.245028733	-0.111625978	0.313100728	0.481896358	FALSE
625	PF3D7_0526600.iso1.exon1.amp4_3706	1.959594077	1.765260614	0.489991357	-0.194333464	0.053084672	0.425460158	FALSE
626	PF3D7_0526900.iso1.exon3.amp1_1800	-0.811141382	-0.886404762	0.220348185	-0.07526338	0.362951746	0.512671731	FALSE
627	PF3D7_0527200.e2s1_8350	0.608403593	0.53150422	0.107290041	-0.076899373	0.654730045	0.744772027	FALSE
628	PF3D7_0527600.6o10_4989	-0.189249735	-0.306836951	0.303244254	-0.117587215	0.215494143	0.43001912	FALSE
629	PF3D7_0528200.e2s1_7765	-0.04450206	-0.148946519	0.351289784	-0.104444458	0.154440647	0.425460158	FALSE
630	PF3D7_0528300.1o1_5292	-0.12326652	-0.192056295	0.238782626	-0.068789775	0.325229844	0.490820497	FALSE
631	PF3D7_0528400.4o8_8756	-0.321672984	-0.529733899	0.520487194	-0.208060915	0.041250103	0.425460158	FALSE
632	PF3D7_0528500.iso1.exon5.amp1_2948	-0.564525691	-0.750765802	0.498595624	-0.186240111	0.049464945	0.425460158	FALSE
633	PF3D7_0529000.1o1_7059	-0.192717841	-0.2609981	0.183721662	-0.068280259	0.446422179	0.574205408	FALSE
634	PF3D7_0529400.1.e2s1_8277	-0.574878808	-0.721432264	0.347303384	-0.146553456	0.158896126	0.425460158	FALSE
635	PF3D7_0529400.1.e5s1_7458	-0.10645454	-0.261628913	0.411395236	-0.155174373	0.0989617	0.425460158	FALSE
636	PF3D7_0529400.1.e7s1_6001	-0.460991312	-0.519572255	0.266263876	-0.058580942	0.274306892	0.461213957	FALSE
637	PF3D7_0529700.iso1.exon2.amp1_3636	-0.513600337	-0.585402397	0.233257685	-0.07180206	0.336233163	0.495994122	FALSE
638	PF3D7_0530100.2o2_9005	1.156266978	0.976531575	0.271125265	-0.179735404	0.265950184	0.45498738	FALSE
639	PF3D7_0530900.iso1.exon1.amp1_818	-0.125008942	-0.248884952	0.270600347	-0.123876011	0.266843218	0.45568111	FALSE
640	PF3D7_0530900.iso1.exon1.amp2_1107	-0.291357516	-0.356101527	0.300749693	-0.064744012	0.219123855	0.43001912	FALSE
641	PF3D7_0530900.iso1.exon1.amp3_3077	-0.620662217	-0.64916446	0.198286992	-0.028502243	0.411879761	0.545283688	FALSE
642	PF3D7_0531100.iso1.exon1.amp2_seg2_3774	-0.444605764	-0.500928162	0.168053686	-0.056322398	0.485523881	0.604690894	FALSE
643	PF3D7_0531400.iso1.exon1.amp2_1631	-0.270524911	-0.351900858	0.258937041	-0.081375947	0.287268601	0.468554861	FALSE
644	PF3D7_0532100_6557	1.259913224	1.233603006	0.070899957	-0.026310218	0.767212488	0.833823185	FALSE
645	PF3D7_0532300.e2s1_9209	-0.211685099	-0.306657986	0.233780173	-0.094972887	0.335181532	0.495700957	FALSE
646	PF3D7_0532400.e1s1_5131	-0.969229122	-0.96042726	0.01967382	0.008801862	0.934453672	0.95523445	FALSE
647	PF3D7_0532400.e2s1_5163	-0.51682683	-0.592403276	0.37737434	-0.075576446	0.127780492	0.425460158	FALSE
648	PF3D7_0533100.iso1.exon1.amp1_3129	-0.601010813	-0.696428927	0.354224406	-0.095418113	0.151227218	0.425460158	FALSE
649	PF3D7_0533100.iso1.exon1.amp2_3418	-0.102641108	-0.230722333	0.511087486	-0.128081225	0.04461022	0.425460158	FALSE
650	PF3D7_0533100.iso1.exon1.amp3_1389	-0.546223575	-0.598173367	0.403345685	-0.051949792	0.10521764	0.425460158	FALSE
651	PF3D7_0600200.iso1.exon1.amp3_1938	-0.10885883	-0.225866633	0.276066736	-0.117007803	0.257653095	0.450960176	FALSE
652	PF3D7_0600300.iso1.exon1.amp1_1286	0.368411965	0.104189288	0.357786604	-0.264222677	0.147401382	0.425460158	FALSE
653	PF3D7_0600400.iso1.exon1.amp1_3033	1.233025299	1.240230258	0.013279372	0.007204959	0.955728154	0.968508039	FALSE
654	PF3D7_0600400.iso1.exon2.amp1_1895	-0.531133063	-0.625477005	0.763784948	-0.094343942	0.004809684	0.425460158	FALSE
655	PF3D7_0600500.iso1.exon2.amp1_130	0.896147585	0.692804542	0.353913632	-0.203343043	0.151564869	0.425460158	FALSE
656	PF3D7_0600700.iso1.exon1.amp1_4469	0.603433638	0.300137872	0.424294599	-0.303295766	0.089610968	0.425460158	FALSE
657	PF3D7_0601000.iso1.exon1.amp1_3293	-0.316244411	-0.451495358	0.539157405	-0.135250946	0.035258553	0.425460158	FALSE
658	PF3D7_0601200.iso1.exon2.amp1_695	0.275067868	-0.009366892	0.379532778	-0.28443476	0.125760066	0.425460158	FALSE
659	PF3D7_0601500.iso1.exon1.amp1_4480	-0.586859612	-0.660517023	0.343717009	-0.073657411	0.162994597	0.425460158	FALSE
660	PF3D7_0601700.2o2_6415	-0.856896958	-0.723148308	0.277036668	0.13374865	0.256047719	0.450960176	FALSE
661	PF3D7_0602000.iso1.exon1.amp2_4515	-0.366914433	-0.574547746	0.330505294	-0.207633314	0.17884734	0.425460158	FALSE
662	PF3D7_0602100.iso1.exon1.amp1_1671	0.815789443	0.55814686	0.476964965	-0.257642582	0.059024692	0.425460158	FALSE
663	PF3D7_0602100.iso1.exon1.amp2_1960	-0.065575587	-0.244401564	0.421860383	-0.178825977	0.091313904	0.425460158	FALSE
664	PF3D7_0602200.1o3_6695	-0.416657781	-0.472014198	0.36869328	-0.055356417	0.136186178	0.425460158	FALSE
665	PF3D7_0602600.iso1.exon3.amp1_4131	-0.042826588	0.019602169	0.07287673	0.062428757	0.760934519	0.829534101	FALSE
666	PF3D7_0602600.iso1.exon4.amp1_377	-0.321672763	-0.434581517	0.464920754	-0.112908754	0.065044874	0.425460158	FALSE
667	PF3D7_0602700.iso1.exon1.amp1_1591	-0.075299709	-0.139602248	0.21775836	-0.06430254	0.368482155	0.517386696	FALSE
668	PF3D7_0603100.1o1_7881	-0.414776225	-0.520508273	0.51536124	-0.105732048	0.043052424	0.425460158	FALSE
669	PF3D7_0603300.iso1.exon1.amp1_2181	-0.200061132	-0.239783592	0.089518171	-0.03972246	0.708801647	0.788569511	FALSE
670	PF3D7_0603800.16o20_7091	-0.299529755	-0.176843616	0.256067669	0.122686139	0.29246578	0.470619313	FALSE
671	PF3D7_0604000.iso1.exon1.amp1_1983	-0.472593952	-0.59328175	0.222336054	-0.120687798	0.358745384	0.510140442	FALSE
672	PF3D7_0604000.iso1.exon1.amp3_760	-0.25159935	-0.297802891	0.220172809	-0.046203541	0.363324453	0.512671731	FALSE
673	PF3D7_0604100.iso1.exon1.amp2_3651	0.696996113	0.506333769	0.289115533	-0.190662344	0.236686455	0.437776265	FALSE
674	PF3D7_0604500.iso1.exon1.amp3_3986	0.14632339	-0.089091752	0.292096442	-0.235415141	0.232086143	0.436172617	FALSE
675	PF3D7_0605000.iso1.exon1.amp1_1561	-0.680252572	-0.784434786	0.385857409	-0.104182214	0.119995429	0.425460158	FALSE
676	PF3D7_0605500.iso1.exon2.amp1_4494	-0.603225815	-0.602425316	0.002309067	0.000800498	0.992297664	0.995136856	FALSE
677	PF3D7_0605600.iso1.exon1.amp1_3384	-0.685706102	-0.863941561	0.426680672	-0.178235459	0.087968814	0.425460158	FALSE
678	PF3D7_0605600.iso1.exon1.amp2_2481	-0.770101608	-0.791677271	0.074121741	-0.021575663	0.756989286	0.826556837	FALSE
679	PF3D7_0605600.iso1.exon4.amp1_4428	-0.308113742	-0.405021607	0.323449813	-0.096907865	0.187812647	0.425460158	FALSE
680	PF3D7_0606000.iso1.exon1.amp2_2795	-0.671273973	-0.830322725	0.285264331	-0.159048751	0.24273347	0.442400559	FALSE
681	PF3D7_0606100.iso1.exon4.amp1_4473	-0.34160157	-0.302047381	0.067054767	0.039554189	0.779471776	0.841811516	FALSE
682	PF3D7_0606500.iso1.exon5.amp1_1589	-0.11988584	-0.345490913	0.39069846	-0.225605073	0.115736729	0.425460158	FALSE
683	PF3D7_0606600.iso1.exon2.amp1_2254	-0.445187	-0.503619689	0.24492401	-0.058432689	0.313301377	0.481896358	FALSE
684	PF3D7_0606700.iso1.exon1.amp1_3408	-0.315419219	-0.474233592	0.281922131	-0.158814373	0.24807663	0.446457304	FALSE
685	PF3D7_0606800.1o1_4981	0.072912816	-0.028742868	0.272602459	-0.101655685	0.2634491	0.452919237	FALSE
686	PF3D7_0607300.2o2_5577	-0.740705644	-0.80273674	0.258462961	-0.062031096	0.28812257	0.468616987	FALSE
687	PF3D7_0607600.1o5_6489	0.283457981	0.065697741	0.330082755	-0.21776024	0.17937432	0.425460158	FALSE
688	PF3D7_0607700.iso1.exon1.amp2_seg1_2869	-0.684716166	-0.81341181	0.258369928	-0.128695643	0.288290369	0.468618084	FALSE
689	PF3D7_0608100.iso1.exon1.amp1_4297	-0.793161577	-0.888892039	0.221558031	-0.095730462	0.360387698	0.511637923	FALSE
690	PF3D7_0608100.iso1.exon1.amp2_2496	-0.413533592	-0.490852933	0.151148866	-0.077319341	0.529898522	0.639619224	FALSE
691	PF3D7_0608310.iso1.exon3.amp1_440	-0.569263419	-0.766785537	0.456366368	-0.197522118	0.069650105	0.425460158	FALSE
692	PF3D7_0608400.iso1.exon2.amp1_1521	-0.071141472	-0.377784008	0.561963087	-0.306642535	0.029038534	0.425460158	FALSE
693	PF3D7_0608500.2o2_7844	-0.362012921	-0.492896409	0.444898863	-0.130883488	0.076280237	0.425460158	FALSE
694	PF3D7_0609000.iso1.exon1.amp1_3985	0.063545216	-0.184337334	0.394899618	-0.24788255	0.112146509	0.425460158	FALSE
695	PF3D7_0609000.iso1.exon1.amp2_4274	1.079811256	0.827485863	0.428164279	-0.252325393	0.08696114	0.425460158	FALSE
696	PF3D7_0609300.iso1.exon1.amp1_745	-0.516590922	-0.665413219	0.562835681	-0.148822298	0.028822276	0.425460158	FALSE
697	PF3D7_0609900.iso1.exon1.amp2_2850	-0.546094842	-0.672525062	0.319941261	-0.12643022	0.192403709	0.425460158	FALSE
698	PF3D7_0610000.iso1.exon2.amp1_2117	-0.489402434	-0.522039556	0.217351647	-0.032637122	0.369355834	0.51792712	FALSE
699	PF3D7_0610200.1o1_5636	-0.259282842	-0.390339879	0.27338285	-0.131057037	0.262134955	0.452919237	FALSE
700	PF3D7_0611800.iso1.exon5.amp1_seg1_1151	-0.387013728	-0.426290886	0.231549087	-0.039277158	0.33968827	0.498190066	FALSE
701	PF3D7_0611800.iso1.exon5.amp3_508	0.240872856	-0.075257308	0.386222368	-0.316130164	0.119669773	0.425460158	FALSE
702	PF3D7_0611900.iso1.exon1.amp1_2690	-0.464112713	-0.499830136	0.130647137	-0.035717423	0.586599679	0.687829149	FALSE
703	PF3D7_0612700.1o1_6423	-0.677953198	-0.756500043	0.253275111	-0.078546845	0.2975896	0.472362763	FALSE
704	PF3D7_0613300.iso1.exon3.amp1_635	-0.475040269	-0.594084669	0.452428154	-0.1190444	0.071866673	0.425460158	FALSE
705	PF3D7_0613300.iso1.exon5.amp1_2341	-0.456529719	-0.616441958	0.463631097	-0.159912239	0.065721185	0.425460158	FALSE
706	PF3D7_0613900.iso1.exon1.amp2_2265	-0.483871219	-0.618348782	0.52965084	-0.134477563	0.038200558	0.425460158	FALSE
707	PF3D7_0614000.iso1.exon1.amp1_157	-0.550576365	-0.60335515	0.209909614	-0.052778785	0.385589954	0.5282709	FALSE
708	PF3D7_0614400.1o1_8430	-0.094114103	-0.214566931	0.3594201	-0.120452827	0.145674136	0.425460158	FALSE
709	PF3D7_0614800.iso1.exon1.amp1_433	-0.532107014	-0.738165874	0.30200114	-0.206058861	0.217296997	0.43001912	FALSE
710	PF3D7_0615100.1o1_7590	-0.075786139	-0.130279926	0.382758041	-0.054493787	0.122791611	0.425460158	FALSE
711	PF3D7_0615600.5o8_7086	-0.416238372	-0.494928255	0.380480492	-0.078689883	0.124881553	0.425460158	FALSE
712	PF3D7_0615800.2o3_6521	-0.21165207	-0.299949196	0.320830716	-0.088297126	0.191231397	0.425460158	FALSE
713	PF3D7_0616000.1o3_5009	-0.648871234	-0.706589714	0.328128455	-0.05771848	0.181828057	0.425460158	FALSE
714	PF3D7_0616300.iso1.exon1.amp1_967	-0.64646304	-0.800295251	0.230509965	-0.153832211	0.341801668	0.498975674	FALSE
715	PF3D7_0616800.iso1.exon1.amp1_2475	-0.120041182	-0.134975666	0.052530203	-0.014934484	0.826295001	0.876629279	FALSE
716	PF3D7_0617000.1o1_8750	-0.472234711	-0.621972626	0.514070557	-0.149737915	0.043517525	0.425460158	FALSE
717	PF3D7_0617400.s3 (renamed)_7396	0.340739452	0.197760313	0.587676999	-0.142979139	0.023264421	0.425460158	FALSE
718	PF3D7_0617600.iso1.exon1.amp1_3292	1.3510485	1.040963662	0.450612081	-0.310084839	0.072909873	0.425460158	FALSE
719	PF3D7_0617700.iso1.exon1.amp1_3596	0.604883965	0.311859408	0.447103231	-0.293024557	0.074963749	0.425460158	FALSE
720	PF3D7_0618500.1o1_6121	-0.380083931	-0.482167253	0.318875375	-0.102083322	0.193816135	0.425460158	FALSE
721	PF3D7_0618700.1o2_6708	1.083274013	0.978448857	0.286130653	-0.104825157	0.241362977	0.441187606	FALSE
722	PF3D7_0618900.2o10_5031	-0.633530518	-0.682697108	0.220727053	-0.04916659	0.362147467	0.512671731	FALSE
723	PF3D7_0618900.iso2.exon2.amp1_2167	0.035551021	0.062990075	0.043593777	0.027439054	0.855454685	0.8983996	FALSE
724	PF3D7_0619000.1.12o14_6224	-0.567407382	-0.767683242	0.507205473	-0.20027586	0.04606994	0.425460158	FALSE
725	PF3D7_0619000.1.e12_5382	-0.540949961	-0.647223172	0.313489994	-0.10627321	0.201079608	0.426342335	FALSE
726	PF3D7_0619000.1.s1 (renamed)_5662	-0.811223143	-0.831322679	0.075103931	-0.020099537	0.753881749	0.823970429	FALSE
727	PF3D7_0619000.iso2.exon13.amp1_3564	-0.467650969	-0.637309298	0.362007952	-0.169658329	0.142972351	0.425460158	FALSE
728	PF3D7_0619400.iso1.exon1.amp1_727	-0.531222157	-0.627011501	0.581192678	-0.095789344	0.024608723	0.425460158	FALSE
729	PF3D7_0619400.iso1.exon2.amp1_2684	-0.282773749	-0.463987244	0.418375423	-0.181213495	0.093801231	0.425460158	FALSE
730	PF3D7_0619700.iso1.exon2.amp1_2417	-0.644536299	-0.596125336	0.095919167	0.048410964	0.689122239	0.771068938	FALSE
731	PF3D7_0619900.iso1.exon1.amp1_2419	-0.846364908	-0.924457314	0.205154092	-0.078092406	0.396209094	0.533338981	FALSE
732	PF3D7_0620000.1o1_5588	-0.050009945	-0.125561187	0.201513792	-0.075551242	0.404466834	0.539545672	FALSE
733	PF3D7_0620100.2o2_6690	-0.398286645	-0.51326504	0.578704283	-0.114978395	0.025143807	0.425460158	FALSE
734	PF3D7_0620200.1o1_6128	0.367646472	0.053177104	0.422269404	-0.314469368	0.091025793	0.425460158	FALSE
735	PF3D7_0620400.1o1_7613	0.68908894	0.742742967	0.099541307	0.053654026	0.678085896	0.762745996	FALSE
736	PF3D7_0620600.1o1_5842	0.206610453	0.115473373	0.51140625	-0.091137079	0.044492265	0.425460158	FALSE
737	PF3D7_0621200.iso1.exon1.amp1_1855	-0.127353123	-0.261944991	0.470630982	-0.134591868	0.062124941	0.425460158	FALSE
738	PF3D7_0621400.1o1_8784	-0.103096195	-0.232802827	0.336042018	-0.129706632	0.172057466	0.425460158	FALSE
739	PF3D7_0621900.1o1_7648	-0.310477348	-0.528081755	0.345463352	-0.217604408	0.160988161	0.425460158	FALSE
740	PF3D7_0622000.iso1.exon1.amp1_2087	-0.272476966	-0.422708231	0.415146894	-0.150231265	0.09615816	0.425460158	FALSE
741	PF3D7_0622000.iso1.exon3.amp1_2970	0.224906014	0.112536999	0.291036121	-0.112369015	0.233714505	0.436467988	FALSE
742	PF3D7_0622100.iso1.exon1.amp1_seg1_3159	-0.494059946	-0.623405467	0.351576089	-0.129345521	0.154124672	0.425460158	FALSE
743	PF3D7_0622100.iso1.exon1.amp2_seg2_2303	-0.439259188	-0.522809012	0.318362672	-0.083549824	0.194498476	0.425460158	FALSE
744	PF3D7_0622800.s1 (renamed)_4799	0.860563692	0.698612309	0.312802899	-0.161951383	0.202021701	0.426342335	FALSE
745	PF3D7_0622800.s2 (renamed)_5666	-0.367557402	-0.396143872	0.163018923	-0.02858647	0.498506923	0.613076057	FALSE
746	PF3D7_0623300.iso1.exon4.amp1_75	-0.284222733	-0.321624445	0.220227717	-0.037401712	0.363207736	0.512671731	FALSE
747	PF3D7_0623400.1o1_5006	-0.010526564	-0.096854775	0.234270558	-0.086328211	0.334196618	0.494766271	FALSE
748	PF3D7_0623700.iso1.exon1.amp2_4528	-0.322556372	-0.471710443	0.332959585	-0.149154071	0.175811187	0.425460158	FALSE
749	PF3D7_0623800.iso1.exon1.amp3_470	-0.433178586	-0.526561286	0.255165876	-0.0933827	0.294113298	0.471401893	FALSE
750	PF3D7_0623900.1o1_5269	-0.324423705	-0.333456962	0.056180354	-0.009033257	0.814456644	0.867282144	FALSE
751	PF3D7_0624500.iso1.exon1.amp1_1536	-0.383982899	-0.493971345	0.411888768	-0.109988445	0.098588876	0.425460158	FALSE
752	PF3D7_0624600.iso1.exon1.amp2_2263	-0.178341111	-0.297318175	0.216549725	-0.118977064	0.371082591	0.51792712	FALSE
753	PF3D7_0624900.iso1.exon8.amp1_2391	-0.439357306	-0.486123963	0.190501446	-0.046766657	0.430124286	0.563057189	FALSE
754	PF3D7_0625000.iso2.exon1.amp1_1527	0.064957881	-0.027132305	0.341381418	-0.092090186	0.165710116	0.425460158	FALSE
755	PF3D7_0625400.1o1_5288	-0.004994821	-0.07251108	0.225164736	-0.067516259	0.352817659	0.507269912	FALSE
756	PF3D7_0625500.1o1_7006	-0.588380111	-0.681746363	0.295720105	-0.093366252	0.226587425	0.431784494	FALSE
757	PF3D7_0625600.1o1_7626	-0.356271829	-0.438847869	0.235865711	-0.08257604	0.331006913	0.493334604	FALSE
758	PF3D7_0626100.iso1.exon2.amp1_4098	-0.483605315	-0.583375344	0.281933215	-0.099770029	0.248058763	0.446457304	FALSE
759	PF3D7_0626600.1o1_6969	-0.157593835	-0.261973045	0.373596211	-0.10437921	0.131383251	0.425460158	FALSE
760	PF3D7_0626800.iso1.exon1.amp1_2938	-0.348543574	-0.490178919	0.32877615	-0.141635346	0.181011848	0.425460158	FALSE
761	PF3D7_0626800.iso1.exon2.amp1_1841	-0.13071036	-0.292973702	0.520219263	-0.162263343	0.04134256	0.425460158	FALSE
762	PF3D7_0626800.iso1.exon3.amp1_689	0.410061161	0.117944072	0.531952262	-0.292117089	0.03746816	0.425460158	FALSE
763	PF3D7_0626900.1o1_4986	0.658588246	0.497238827	0.327037239	-0.161349419	0.183209907	0.425460158	FALSE
764	PF3D7_0627000.1o1_6672	-0.613998832	-0.699662563	0.381298413	-0.08566373	0.124127553	0.425460158	FALSE
765	PF3D7_0627100.iso1.exon1.amp1_4595	0.433740137	0.092075836	0.410140803	-0.341664301	0.099914845	0.425460158	FALSE
766	PF3D7_0627400.1o1_5247	-0.012814856	-0.196526337	0.383698372	-0.18371148	0.121937459	0.425460158	FALSE
767	PF3D7_0628000.1o1_7263	-0.171497596	-0.377194664	0.47882028	-0.205697068	0.058143441	0.425460158	FALSE
768	PF3D7_0628100.iso1.exon1.amp10_2250	-0.43090087	-0.604693164	0.419403027	-0.173792294	0.093061711	0.425460158	FALSE
769	PF3D7_0628100.iso1.exon1.amp11_1613	-0.50630967	-0.636651312	0.300645492	-0.130341642	0.219276508	0.43001912	FALSE
770	PF3D7_0628100.iso1.exon1.amp6_2244	-0.659694318	-0.71343465	0.208957757	-0.053740332	0.387700168	0.528750618	FALSE
771	PF3D7_0628100.iso1.exon1.amp7_1383	-0.424774506	-0.552514468	0.406642294	-0.127739962	0.102615333	0.425460158	FALSE
772	PF3D7_0628100.iso1.exon1.amp9_1961	0.99857564	0.857609781	0.292888372	-0.140965859	0.230875692	0.435427575	FALSE
773	PF3D7_0628200.s1_6574	-0.487771867	-0.520416494	0.24187418	-0.032644627	0.319185345	0.486587855	FALSE
774	PF3D7_0628200.s2 (renamed)_6863	0.412277639	0.181869603	0.45474304	-0.230408037	0.070556262	0.425460158	FALSE
775	PF3D7_0628600.iso1.exon3.amp1_4371	-0.614920191	-0.731078232	0.436981695	-0.116158042	0.081179348	0.425460158	FALSE
776	PF3D7_0629000.iso1.exon1.amp1_120	-0.077607477	-0.280049858	0.474871864	-0.202442381	0.060033373	0.425460158	FALSE
777	PF3D7_0629300.1o1_7935	-0.125655747	-0.261817365	0.429976863	-0.136161618	0.085743811	0.425460158	FALSE
778	PF3D7_0629500.1o2_8488	-0.745054401	-0.825899038	0.352424676	-0.080844637	0.153191288	0.425460158	FALSE
779	PF3D7_0629600.iso1.exon2.amp1_3286	-0.556327143	-0.630201673	0.65602198	-0.073874531	0.01274619	0.425460158	FALSE
780	PF3D7_0629700.s3 (renamed)_7149	-0.435427599	-0.566649019	0.217881039	-0.131221421	0.368218896	0.517386696	FALSE
781	PF3D7_0629700.s5 (renamed)_7727	0.029425281	-0.04561109	0.160302896	-0.075036371	0.505593511	0.618535866	FALSE
782	PF3D7_0629900.iso1.exon1.amp1_3279	-1.239200761	-1.348630857	0.259583543	-0.109430096	0.286107051	0.467780857	FALSE
783	PF3D7_0630300.iso1.exon2.amp3_4257	-0.270071811	-0.369516854	0.169160721	-0.099445043	0.482696153	0.602554199	FALSE
784	PF3D7_0630600.2o2_8237	0.991015613	0.868940652	0.305471492	-0.122074962	0.212293438	0.43001912	FALSE
785	PF3D7_0631000.iso1.exon1.amp1_2426	-0.495961239	-0.664312652	0.38045332	-0.168351413	0.124906668	0.425460158	FALSE
786	PF3D7_0631100.iso1.exon2.amp1_1011	-0.171506209	-0.307198963	0.520568195	-0.135692754	0.04122219	0.425460158	FALSE
787	PF3D7_0631400.iso1.exon1.amp1_1562	0.267999189	0.027839807	0.325823303	-0.240159382	0.184757114	0.425460158	FALSE
788	PF3D7_0631800.iso1.exon2.amp1_3318	0.650085193	0.442428419	0.342614064	-0.207656774	0.164272367	0.425460158	FALSE
789	PF3D7_0631900.iso1.exon2.amp1_3298	0.875534652	0.586872019	0.490906079	-0.288662633	0.052688707	0.425460158	FALSE
790	PF3D7_0632000.iso1.exon2.amp1_3020	0.168211038	-0.105011118	0.345967303	-0.273222156	0.160412947	0.425460158	FALSE
791	PF3D7_0632100.iso1.exon1.amp1_705	-0.545775238	-0.704263275	0.38820547	-0.158488037	0.117913394	0.425460158	FALSE
792	PF3D7_0632200.iso1.exon1.amp1_3015	0.626953548	0.369333422	0.498199178	-0.257620125	0.049626645	0.425460158	FALSE
793	PF3D7_0632300.iso1.exon2.amp1_423	0.054211616	-0.156565762	0.455950834	-0.210777378	0.069881064	0.425460158	FALSE
794	PF3D7_0632400.iso1.exon2.amp1_3304	0.361546567	0.069387112	0.396788952	-0.292159456	0.110563371	0.425460158	FALSE
795	PF3D7_0632500.iso1.exon1.amp1_3326	0.816879308	0.427875199	0.452938963	-0.389004109	0.07157566	0.425460158	FALSE
796	PF3D7_0632500.iso1.exon2.amp1_1064	-0.274065715	-0.432073757	0.593632224	-0.158008041	0.022091219	0.425460158	FALSE
797	PF3D7_0632500.iso1.exon2.amp3_492	-0.406217876	-0.466444481	0.257422046	-0.060226606	0.290004129	0.469728718	FALSE
798	PF3D7_0632500.iso1.exon2.amp4_seg2_4605	-0.45276279	-0.510050232	0.18410806	-0.057287442	0.445483125	0.573787176	FALSE
799	PF3D7_0632700.iso1.exon2.amp1_2437	0.642260309	0.414552839	0.309691324	-0.22770747	0.206332016	0.426342335	FALSE
800	PF3D7_0632800.iso1.exon1.amp1_4482	-0.13836556	-0.375774033	0.698582425	-0.237408473	0.008699648	0.425460158	FALSE
801	PF3D7_0700100.iso1.exon3.amp1_1301	1.242686278	0.970220146	0.510128246	-0.272466132	0.04496691	0.425460158	FALSE
802	PF3D7_0700200.iso1.exon3.amp1_994	0.037597488	-0.137851103	0.458844338	-0.175448592	0.068286944	0.425460158	FALSE
803	PF3D7_0700300.iso1.exon3.amp1_3589	-0.19607986	-0.289651958	0.308064261	-0.093572098	0.208614722	0.427495451	FALSE
804	PF3D7_0700400.iso1.exon3.amp1_4165	0.930502022	0.722770095	0.380929065	-0.207731927	0.124467555	0.425460158	FALSE
805	PF3D7_0700500.iso1.exon3.amp1_2741	0.683093693	0.420957934	0.345884558	-0.262135759	0.160507277	0.425460158	FALSE
806	PF3D7_0701000.1o1_5806	1.06470398	0.89882131	0.596099078	-0.16588267	0.021621837	0.425460158	FALSE
807	PF3D7_0701100.iso1.exon3.amp1_2151	0.993405829	0.618700992	0.473080227	-0.374704837	0.060909115	0.425460158	FALSE
808	PF3D7_0701600.iso1.exon2.amp1_4435	-0.144921515	-0.374364179	0.309130581	-0.229442664	0.207116475	0.426446838	FALSE
809	PF3D7_0701800.iso1.exon1.amp1_3301	0.506756584	0.2414234	0.471610056	-0.265333184	0.061636319	0.425460158	FALSE
810	PF3D7_0701900.e2s1_9111	-0.199577824	-0.23439667	0.13723968	-0.034818846	0.568035145	0.670075956	FALSE
811	PF3D7_0702200.1o1_5873	-0.155865724	-0.301780565	0.411724547	-0.145914841	0.098712796	0.425460158	FALSE
812	PF3D7_0702300.2o2_7331	0.261736781	0.272061393	0.013286827	0.010324612	0.955703329	0.968508039	FALSE
813	PF3D7_0702300.e2_6828	-0.79878274	-0.867763031	0.183864491	-0.068980292	0.446074921	0.574022064	FALSE
814	PF3D7_0702400.e1s1_8040	0.122022666	-0.102473371	0.433803092	-0.224496037	0.083223291	0.425460158	FALSE
815	PF3D7_0702500.e1s1_8598	-0.476743048	-0.613823029	0.351966997	-0.137079981	0.153694118	0.425460158	FALSE
816	PF3D7_0702600.iso1.exon1.amp1_3842	-0.312943811	-0.38517775	0.276594875	-0.072233939	0.256778009	0.450960176	FALSE
817	PF3D7_0703100.1o1_5246	0.432991852	0.20938067	0.376975415	-0.223611182	0.128156906	0.425460158	FALSE
818	PF3D7_0703200.iso1.exon1.amp1_4307	-0.298742735	-0.310828078	0.025022016	-0.012085343	0.916698517	0.943924209	FALSE
819	PF3D7_0703300.iso1.exon1.amp1_3572	-0.992077917	-1.028221029	0.134961198	-0.036143112	0.574416603	0.676706894	FALSE
820	PF3D7_0703500.e2s2_7503	1.464595246	1.209997598	0.374392582	-0.254597648	0.130616785	0.425460158	FALSE
821	PF3D7_0703700.e1s1_8629	0.339214594	0.125831887	0.385970664	-0.213382707	0.11989429	0.425460158	FALSE
822	PF3D7_0704000.iso1.exon1.amp1_seg1_3736	-0.275425389	-0.435000895	0.255096538	-0.159575505	0.294240253	0.471401893	FALSE
823	PF3D7_0704200.iso1.exon1.amp1_252	-0.418533642	-0.481049082	0.234565964	-0.062515439	0.333604292	0.494515987	FALSE
824	PF3D7_0704200.iso1.exon1.amp2_769	0.062158214	-0.087058005	0.364134983	-0.149216219	0.140783165	0.425460158	FALSE
825	PF3D7_0704300.s1_6860	-0.572076971	-0.707708819	0.398107103	-0.135631849	0.109470268	0.425460158	FALSE
826	PF3D7_0704500.iso1.exon1.amp2_178	-0.01357682	-0.140431465	0.27236382	-0.126854645	0.263851944	0.452977002	FALSE
827	PF3D7_0704600.iso1.exon5.amp3_seg1_283	0.346330188	0.237584302	0.172179494	-0.108745885	0.475034991	0.595972311	FALSE
828	PF3D7_0704800.iso1.exon1.amp1_3430	-0.472032743	-0.526769259	0.209156332	-0.054736516	0.387259306	0.528497805	FALSE
829	PF3D7_0704800.iso1.exon1.amp2_1629	-0.05990977	-0.178134853	0.300284265	-0.118225083	0.219806345	0.43001912	FALSE
830	PF3D7_0704900.iso1.exon1.amp1_3311	-0.535450594	-0.67526315	0.448274345	-0.139812556	0.074272591	0.425460158	FALSE
831	PF3D7_0705000.e1s1_7991	-0.038248259	-0.196410207	0.463268704	-0.158161948	0.065912361	0.425460158	FALSE
832	PF3D7_0705000.e1s2_6251	-0.503867688	-0.512189546	0.04117129	-0.008321858	0.863398442	0.903683923	FALSE
833	PF3D7_0705500.iso1.exon2.amp2_3383	1.056915954	0.890709226	0.32974219	-0.166206728	0.17979998	0.425460158	FALSE
834	PF3D7_0705500.iso1.exon2.amp3_1354	-0.18505481	-0.375042608	0.509808367	-0.189987798	0.045086437	0.425460158	FALSE
835	PF3D7_0705600.iso1.exon1.amp2_4245	-0.441467702	-0.55577147	0.31724838	-0.114303767	0.195988079	0.426008196	FALSE
836	PF3D7_0706500.iso1.exon1.amp1_3144	-0.720765355	-0.849217162	0.206241735	-0.128451806	0.393763528	0.532615983	FALSE
837	PF3D7_0706700.1o1_8234	-0.154304524	-0.294019259	0.254188426	-0.139714735	0.295906686	0.471905117	FALSE
838	PF3D7_0707200.iso1.exon1.amp1_1982	-0.686664934	-0.721551113	0.177740672	-0.034886179	0.461113681	0.58611186	FALSE
839	PF3D7_0707300.2o5_6209	-0.369712339	-0.418930831	0.103096266	-0.049218492	0.667326961	0.753576689	FALSE
840	PF3D7_0707400.iso1.exon1.amp1_1310	0.751210044	0.622142268	0.309367208	-0.129067776	0.206785155	0.426342335	FALSE
841	PF3D7_0707500.iso1.exon1.amp2_467	-0.16901187	-0.308028913	0.31467162	-0.139017042	0.199467622	0.426342335	FALSE
842	PF3D7_0707700.1o1_5353	0.42998685	0.148815874	0.355608804	-0.281170976	0.14973067	0.425460158	FALSE
843	PF3D7_0708000.e1s1_9235	-0.511231893	-0.627201224	0.379334762	-0.115969331	0.125944284	0.425460158	FALSE
844	PF3D7_0708000.e2s1_8905	-0.425874003	-0.530622944	0.385173388	-0.10474894	0.120607823	0.425460158	FALSE
845	PF3D7_0708400.e1_5679	-0.539456918	-0.589776785	0.23438245	-0.050319867	0.333972172	0.494695177	FALSE
846	PF3D7_0708400.e2_6536	-0.633322198	-0.709299381	0.455968248	-0.075977183	0.069871371	0.425460158	FALSE
847	PF3D7_0709000.e3s1_5972	-0.610235554	-0.700997225	0.217054654	-0.090761671	0.369994705	0.51792712	FALSE
848	PF3D7_0709100.e1s1_4890	-0.73427226	-0.901963783	0.320545317	-0.167691523	0.19160693	0.425460158	FALSE
849	PF3D7_0709300.iso1.exon1.amp3_2493	-0.263365417	-0.329436423	0.189796649	-0.066071005	0.431800825	0.56363949	FALSE
850	PF3D7_0709400.iso1.exon2.amp1_2171	0.432329233	0.226984938	0.270778894	-0.205344295	0.266539207	0.455439328	FALSE
851	PF3D7_0709700.e1s1_7479	0.096052747	0.045601984	0.123221804	-0.050450763	0.607870149	0.707248091	FALSE
852	PF3D7_0709900.3o3_8531	-0.389823636	-0.48545475	0.307789476	-0.095631114	0.209002198	0.427749649	FALSE
853	PF3D7_0709900.e1s2_8563	-0.638860215	-0.824189795	0.378334598	-0.18532958	0.12687826	0.425460158	FALSE
854	PF3D7_0709900.e2_7429	-0.465724637	-0.479785243	0.036443697	-0.014060606	0.878943706	0.916874312	FALSE
855	PF3D7_0709900.e3_5674	-0.07990652	-0.127711239	0.171054661	-0.047804719	0.477881106	0.598471916	FALSE
856	PF3D7_0710200.iso1.exon1.amp2_seg1_3742	-0.623626494	-0.732289598	0.263584996	-0.108663104	0.278994682	0.462832299	FALSE
857	PF3D7_0710200.iso1.exon1.amp3_3649	-0.459896862	-0.552723288	0.36894169	-0.092826425	0.135939328	0.425460158	FALSE
858	PF3D7_0710300.iso1.exon2.amp1_2630	-0.813045906	-0.914520958	0.295664215	-0.101475053	0.226671461	0.431784494	FALSE
859	PF3D7_0710400_9160	0.574926426	0.254598868	0.372415372	-0.320327558	0.132526739	0.425460158	FALSE
860	PF3D7_0710500.iso1.exon5.amp1_1229	-0.560966224	-0.525830279	0.173972727	0.035135945	0.470518691	0.592792608	FALSE
861	PF3D7_0711000.e1s1_7491	-0.229179243	-0.234094255	0.010930429	-0.004915012	0.963552671	0.975731921	FALSE
862	PF3D7_0711000.e1s2_8942	-1.029944419	-1.050304108	0.08753454	-0.02035969	0.714944263	0.792999887	FALSE
863	PF3D7_0711100.iso1.exon1.amp1_1552	0.206294174	-0.026563743	0.441870255	-0.232857917	0.078122459	0.425460158	FALSE
864	PF3D7_0711200.iso1.exon1.amp1_2331	-0.46016719	-0.490730625	0.087285147	-0.030563435	0.715717985	0.793230525	FALSE
865	PF3D7_0711300.iso1.exon1.amp1_3846	-0.32267329	-0.521716561	0.39428649	-0.19904327	0.112664441	0.425460158	FALSE
866	PF3D7_0711700.e2s1_5452	1.323518138	1.216662287	0.341361897	-0.10685585	0.165732967	0.425460158	FALSE
867	PF3D7_0712000.iso1.exon1.amp1_145	1.040891486	0.854183688	0.356086749	-0.186707798	0.149216874	0.425460158	FALSE
868	PF3D7_0712300.iso1.exon1.amp1_3615	0.671577508	0.480886708	0.463959248	-0.1906908	0.065548503	0.425460158	FALSE
869	PF3D7_0712400.iso1.exon1.amp1_1004	0.262749263	0.133654631	0.330359491	-0.129094632	0.179029041	0.425460158	FALSE
870	PF3D7_0712400.iso1.exon2.amp2_2529	0.152566349	0.036270237	0.41886258	-0.116296111	0.093450009	0.425460158	FALSE
871	PF3D7_0712600.iso1.exon1.amp1_434	0.522215398	0.321328276	0.467304995	-0.200887122	0.063811001	0.425460158	FALSE
872	PF3D7_0712800.iso1.exon1.amp1_3904	0.510536261	0.382497865	0.404347744	-0.128038396	0.104420651	0.425460158	FALSE
873	PF3D7_0712800.iso1.exon2.amp2_1944	-0.509634588	-0.618805929	0.197525886	-0.109171341	0.413640982	0.546325631	FALSE
874	PF3D7_0712900.iso1.exon1.amp1_3316	0.934716012	0.672826258	0.388643832	-0.261889755	0.117528137	0.425460158	FALSE
875	PF3D7_0712900.iso1.exon2.amp2_215	-0.537244324	-0.617451939	0.183108095	-0.080207615	0.447915839	0.575060574	FALSE
876	PF3D7_0713000.iso1.exon2.amp1_2451	-0.285672658	-0.350153919	0.324320755	-0.064481261	0.186686743	0.425460158	FALSE
877	PF3D7_0713100.2o2_5537	-0.318305907	-0.391959887	0.232304838	-0.07365398	0.338156948	0.496695696	FALSE
878	PF3D7_0713600.iso1.exon1.amp1_3623	-0.280664449	-0.410154647	0.385804018	-0.129490198	0.120043133	0.425460158	FALSE
879	PF3D7_0713900.e1s1_5647	-0.743975082	-0.835111607	0.135460209	-0.091136524	0.573015836	0.675383104	FALSE
880	PF3D7_0713900.e1s3_8249	0.18005634	-0.05568714	0.349216171	-0.23574348	0.156745193	0.425460158	FALSE
881	PF3D7_0713900.e1s4_5937	1.268314599	1.043637324	0.3943433	-0.224677275	0.112616365	0.425460158	FALSE
882	PF3D7_0714000.e1s1_6579	-0.411692465	-0.524149585	0.307687753	-0.112457119	0.209145781	0.427749649	FALSE
883	PF3D7_0714200.iso1.exon1.amp2_463	-0.208708491	-0.40912343	0.295307107	-0.200414939	0.227208971	0.432221136	FALSE
884	PF3D7_0715000.1o1_5833	-0.450045723	-0.480210732	0.096975376	-0.030165009	0.685896466	0.768137861	FALSE
885	PF3D7_0715300.1o3_4714	-0.289652882	-0.349398492	0.268667196	-0.05974561	0.27015144	0.459650872	FALSE
886	PF3D7_0715600.1o1_6202	-0.727082054	-0.803210883	0.348901347	-0.076128829	0.157097551	0.425460158	FALSE
887	PF3D7_0715800.1o1_6729	-0.055977131	-0.161289071	0.310555067	-0.10531194	0.205128275	0.426342335	FALSE
888	PF3D7_0716200.1o1_8223	-0.266511297	-0.396619432	0.321781	-0.130108136	0.189985248	0.425460158	FALSE
889	PF3D7_0716300.e1s1_8921	0.932164696	0.779887129	0.319870029	-0.152277567	0.192497841	0.425460158	FALSE
890	PF3D7_0717000.iso1.exon2.amp1_1484	-0.67855179	-0.782059779	0.310558643	-0.103507989	0.205123303	0.426342335	FALSE
891	PF3D7_0717200.1o2_8169	0.14575352	-0.029868129	0.472106453	-0.175621649	0.061389911	0.425460158	FALSE
892	PF3D7_0717300.1o4_7894	-0.450467667	-0.59658426	0.483874613	-0.146116593	0.055802798	0.425460158	FALSE
893	PF3D7_0717500.e1s1_5155	0.208127575	-0.007178126	0.368791298	-0.215305701	0.136088731	0.425460158	FALSE
894	PF3D7_0717700.e1s1_9221	-0.425908093	-0.412905174	0.049276965	0.013002919	0.83688258	0.88518248	FALSE
895	PF3D7_0718000.e11s1_8030	-0.783535006	-0.884873936	0.285594066	-0.101338929	0.242211139	0.441873801	FALSE
896	PF3D7_0718000.e4s1_4866	-0.222457101	-0.365399329	0.415911747	-0.142942228	0.095595171	0.425460158	FALSE
897	PF3D7_0718000.e5s1_8036	-0.880941986	-0.982403862	0.32562354	-0.101461876	0.185012727	0.425460158	FALSE
898	PF3D7_0718000.e9s3_8251	-0.896954234	-0.99709073	0.207734005	-0.100136496	0.390424409	0.530683521	FALSE
899	PF3D7_0718000.e9s4_5939	-0.206074903	-0.30733158	0.289982371	-0.101256678	0.235341508	0.436467988	FALSE
900	PF3D7_0718100.iso1.exon1.amp2_1370	-0.314200096	-0.411111091	0.333777609	-0.096910995	0.174808581	0.425460158	FALSE
901	PF3D7_0718300.e5s1_8050	-0.166398616	-0.290613666	0.348454923	-0.12421505	0.15759832	0.425460158	FALSE
902	PF3D7_0718300.e7s1_4783	-0.046096413	-0.153466396	0.25857278	-0.107369983	0.287924585	0.468566766	FALSE
903	PF3D7_0718600.iso1.exon6.amp1_3617	-0.247170653	-0.327447934	0.208754982	-0.080277281	0.388150698	0.529107709	FALSE
904	PF3D7_0718600.iso1.exon8.amp1_4159	-0.579663751	-0.665870905	0.443062894	-0.086207154	0.077392347	0.425460158	FALSE
905	PF3D7_0718800.iso1.exon4.amp1_3221	-0.643766848	-0.788731023	0.477747328	-0.144964176	0.058651617	0.425460158	FALSE
906	PF3D7_0719000.1o1_5524	-0.314782861	-0.340897587	0.103939223	-0.026114726	0.664786575	0.751857694	FALSE
907	PF3D7_0719100.iso1.exon2.amp1_947	0.072397779	-0.082016037	0.261951557	-0.154413817	0.281882054	0.465202053	FALSE
908	PF3D7_0719200.e1s1_7415	-0.521036245	-0.59040811	0.190241807	-0.069371865	0.430741425	0.563339065	FALSE
909	PF3D7_0719200.e9s1_8565	-0.255645252	-0.415873738	0.48880376	-0.160228486	0.0536028	0.425460158	FALSE
910	PF3D7_0719400.s1_5695	-0.966829934	-1.010675124	0.211403685	-0.043845189	0.382293141	0.526756741	FALSE
911	PF3D7_0719500.1o2_8186	-0.26892791	-0.308334675	0.085177055	-0.039406765	0.722270806	0.797969795	FALSE
912	PF3D7_0719500.2o2_9047	-0.496734199	-0.569734391	0.249593442	-0.073000191	0.30444427	0.478149217	FALSE
913	PF3D7_0719600.e2_5954	-0.440976001	-0.492880776	0.169096494	-0.051904775	0.482859945	0.602554199	FALSE
914	PF3D7_0719700 (renamed)_9040	1.81109396	1.564586371	0.324348895	-0.246507588	0.186650456	0.425460158	FALSE
915	PF3D7_0719700.e3s1_7128	-0.374710001	-0.434755683	0.368156531	-0.060045681	0.136720844	0.425460158	FALSE
916	PF3D7_0721000.iso1.exon1.amp1_1958	-0.302942732	-0.562351589	0.476864882	-0.259408857	0.059072572	0.425460158	FALSE
917	PF3D7_0721000.iso1.exon1.amp2_2247	-0.212303704	-0.544796905	0.558581781	-0.332493201	0.029890977	0.425460158	FALSE
918	PF3D7_0721100_5690	-0.24249256	-0.427238336	0.444085467	-0.184745776	0.076771176	0.425460158	FALSE
919	PF3D7_0721600.e2s1_4856	-0.33252527	-0.397285386	0.299063726	-0.064760116	0.221604005	0.43001912	FALSE
920	PF3D7_0721700_4819	-0.611276848	-0.677795121	0.260988066	-0.066518272	0.283595513	0.465202053	FALSE
921	PF3D7_0722600.e1s1_6051	-0.297809962	-0.42474711	0.358105158	-0.126937149	0.147063213	0.425460158	FALSE
922	PF3D7_0722800.1o1_5891	0.598264674	0.644622729	0.067359458	0.046358055	0.778498121	0.841811516	FALSE
923	PF3D7_0723000.iso1.exon1.amp1_3306	-0.10651869	-0.187399784	0.149467416	-0.080881094	0.534432471	0.643706464	FALSE
924	PF3D7_0723200.e4s1_7754	-0.620940009	-0.701967263	0.254931757	-0.081027254	0.294542124	0.471401893	FALSE
925	PF3D7_0723400.e1s2_6637	-0.29629882	-0.515372782	0.342204351	-0.219073962	0.164749113	0.425460158	FALSE
926	PF3D7_0723500_4823	-0.713146016	-0.804581836	0.309655095	-0.09143582	0.206382628	0.426342335	FALSE
927	PF3D7_0723700.iso1.exon1.amp2_1934	-0.714889127	-0.715436945	0.001113864	-0.000547818	0.996284443	0.996995567	FALSE
928	PF3D7_0723800.iso1.exon1.amp3_2230	-0.807608916	-0.870791773	0.213720467	-0.063182857	0.377218306	0.52339629	FALSE
929	PF3D7_0723800.iso1.exon2.amp1_2646	-0.248932836	-0.554824545	0.460144297	-0.305891709	0.067581417	0.425460158	FALSE
930	PF3D7_0723900.e1s2_5176	-0.302591367	-0.342646305	0.206674262	-0.040054938	0.392793767	0.532484992	FALSE
931	PF3D7_0724300.iso1.exon1.amp1_112	-0.553723665	-0.615748401	0.272899214	-0.062024736	0.262948794	0.452919237	FALSE
932	PF3D7_0724400.iso1.exon1.amp1_2105	-0.657645286	-0.702931153	0.176395174	-0.045285868	0.464458917	0.589028857	FALSE
933	PF3D7_0724700.e2s2_8380	0.022883036	-0.254929255	0.35963303	-0.277812291	0.145450235	0.425460158	FALSE
934	PF3D7_0725100.e1s1_5471	-0.363775359	-0.4683091	0.310225535	-0.104533741	0.205586864	0.426342335	FALSE
935	PF3D7_0725200.iso1.exon3.amp1_3844	-0.401748747	-0.476650453	0.409308268	-0.074901706	0.100551818	0.425460158	FALSE
936	PF3D7_0726100.2o2_6782	-0.648270689	-0.676179096	0.133579126	-0.027908408	0.578305394	0.679902861	FALSE
937	PF3D7_0726200.iso1.exon2.amp1_1023	-0.187694475	-0.259844293	0.248565096	-0.072149818	0.306379154	0.47887335	FALSE
938	PF3D7_0726400.e1s1_6882	-0.450043426	-0.522438655	0.309113782	-0.072395229	0.207140012	0.426446838	FALSE
939	PF3D7_0726400.e1s3_8538	-0.76434517	-0.872125093	0.24131463	-0.107779923	0.320273381	0.486746103	FALSE
940	PF3D7_0726400.e2s1_8610	-0.518125295	-0.623002145	0.386432605	-0.10487685	0.11948252	0.425460158	FALSE
941	PF3D7_0726400.e2s2_9247	-0.303407792	-0.277068349	0.081603591	0.026339443	0.733429286	0.806484596	FALSE
942	PF3D7_0726400.e3s1_8933	-0.539067032	-0.650792003	0.249046446	-0.111724971	0.305472367	0.47887335	FALSE
943	PF3D7_0726400.e6s1_8651	-0.933696604	-1.082560917	0.23107156	-0.148864313	0.340658342	0.498882886	FALSE
944	PF3D7_0726400.e6s2_4899	0.665850019	0.681791923	0.026484914	0.015941905	0.911849401	0.940701148	FALSE
945	PF3D7_0726500.iso1.exon4.amp1_3386	-0.024368386	-0.123076597	0.236957272	-0.098708211	0.328836609	0.492495221	FALSE
946	PF3D7_0726500.iso1.exon4.amp2_2525	-0.537105275	-0.503595778	0.10969574	0.033509497	0.647551767	0.738704294	FALSE
947	PF3D7_0726600.1o2_6479	0.115034521	-0.106286621	0.313988781	-0.221321143	0.200397898	0.426342335	FALSE
948	PF3D7_0727000.iso1.exon1.amp1_1996	-0.853555228	-0.925497842	0.647316454	-0.071942614	0.013773506	0.425460158	FALSE
949	PF3D7_0727200.1o1_6756	0.092387728	0.030967027	0.21005111	-0.061420702	0.385276921	0.5282709	FALSE
950	PF3D7_0727800.iso1.exon1.amp1_4594	-0.230669879	-0.268847883	0.111537952	-0.038178004	0.642078869	0.735278352	FALSE
951	PF3D7_0727900.e1s2_5080	-0.245799458	-0.381964816	0.321153316	-0.136165358	0.190807624	0.425460158	FALSE
952	PF3D7_0728000.e2_6530	-0.493560634	-0.749483561	0.485950754	-0.255922926	0.05486636	0.425460158	FALSE
953	PF3D7_0728200.2o2_7918	-0.653927732	-0.565264362	0.144095714	0.08866337	0.54905885	0.653625015	FALSE
954	PF3D7_0728300.iso1.exon1.amp1_984	-0.553396901	-0.581985904	0.218089671	-0.028589003	0.367771486	0.517386696	FALSE
955	PF3D7_0728600.iso1.exon1.amp1_205	-0.467842595	-0.57681758	0.396386774	-0.108974985	0.11089875	0.425460158	FALSE
956	PF3D7_0728600.iso1.exon3.amp1_2396	0.233405149	0.243424837	0.028983944	0.010019688	0.903574159	0.936247896	FALSE
957	PF3D7_0728700.iso1.exon3.amp1_1258	-0.27908295	-0.392492662	0.366848574	-0.113409711	0.138031118	0.425460158	FALSE
958	PF3D7_0728800.iso1.exon1.amp1_4481	-0.458013832	-0.478817615	0.072957775	-0.020803783	0.760677491	0.829534101	FALSE
959	PF3D7_0729500.iso1.exon1.amp1_1884	-0.301623778	-0.348458768	0.189942476	-0.04683499	0.4314536	0.563482019	FALSE
960	PF3D7_0729700.iso1.exon2.amp1_1872	-0.266082429	-0.388057258	0.570330956	-0.121974829	0.027025937	0.425460158	FALSE
961	PF3D7_0729800.iso1.exon1.amp1_365	-0.347245457	-0.503127883	0.489758548	-0.155882426	0.053185882	0.425460158	FALSE
962	PF3D7_0729900.e1s1_5072	-0.503109411	-0.533163661	0.086337513	-0.030054251	0.718660833	0.795234797	FALSE
963	PF3D7_0730000.iso1.exon1.amp1_348	-0.455941972	-0.531835873	0.349714347	-0.075893901	0.156188958	0.425460158	FALSE
964	PF3D7_0730300.e1s1_5186	-0.317383166	-0.543787901	0.291759107	-0.226404735	0.232603242	0.436247701	FALSE
965	PF3D7_0730300.e1s2_5758	-0.044181029	-0.149740552	0.264671815	-0.105559523	0.277085733	0.46266608	FALSE
966	PF3D7_0730500.e1s3_7387	-0.297979833	-0.29730759	0.002699785	0.000672243	0.990994405	0.994541271	FALSE
967	PF3D7_0730800.1.e2s1_5161	-0.953839566	-0.898377777	0.100742287	0.055461789	0.67444302	0.760409421	FALSE
968	PF3D7_0730800.iso2.exon2.amp1_1557	-0.972209877	-1.035912877	0.371213242	-0.063703	0.133699461	0.425460158	FALSE
969	PF3D7_0730900.e1s1_8316	-0.169566441	-0.251149439	0.156996822	-0.081582998	0.514297155	0.625363929	FALSE
970	PF3D7_0730900.e2s1_8659	-0.314471123	-0.436459679	0.486417653	-0.121988556	0.054657741	0.425460158	FALSE
971	PF3D7_0731100.2o2_6789	0.508963929	0.44043072	0.185983953	-0.068533209	0.440941653	0.569507322	FALSE
972	PF3D7_0731200.2o2_8439	0.371117833	0.206827468	0.330798494	-0.164290365	0.178482408	0.425460158	FALSE
973	PF3D7_0731500.s1 (renamed)_7684	-0.864587538	-0.791795399	0.138587172	0.072792139	0.56427863	0.666766658	FALSE
974	PF3D7_0731500.s2 (renamed)_7112	-0.508630323	-0.539700953	0.134200951	-0.03107063	0.57655407	0.67869757	FALSE
975	PF3D7_0731600.e1s1_6357	0.257770049	0.218031097	0.357296724	-0.039738952	0.147922691	0.425460158	FALSE
976	PF3D7_0732000.iso1.exon2.amp1_690	1.228696125	1.002205707	0.388169491	-0.226490419	0.117945063	0.425460158	FALSE
977	PF3D7_0732200.iso1.exon2.amp1_1297	0.529049047	0.287432881	0.24080039	-0.241616166	0.32127564	0.487377063	FALSE
978	PF3D7_0732300.iso1.exon1.amp1_4175	-0.192003804	-0.441365679	0.296007305	-0.249361875	0.226155982	0.431388689	FALSE
979	PF3D7_0732400.iso1.exon1.amp1_2443	-0.509452058	-0.617829479	0.256820776	-0.108377421	0.291095086	0.470619313	FALSE
980	PF3D7_0732500.iso1.exon1.amp1_135	-0.594511639	-0.635325633	0.213070844	-0.040813994	0.378636698	0.523777652	FALSE
981	PF3D7_0732700.iso1.exon2.amp1_712	1.091028012	0.852644114	0.30492506	-0.238383898	0.213075217	0.43001912	FALSE
982	PF3D7_0732900.iso1.exon2.amp1_996	0.050779084	-0.13498333	0.442634175	-0.185762414	0.077654102	0.425460158	FALSE
983	PF3D7_0733000.iso1.exon1.amp1_3621	0.949551231	0.724338286	0.584180691	-0.225212945	0.023980397	0.425460158	FALSE
984	PF3D7_0733000.iso1.exon2.amp3_1942	-0.436239262	-0.573987649	0.563733922	-0.137748387	0.02860124	0.425460158	FALSE
985	PF3D7_0800100.iso1.exon1.amp1_723	0.85618487	0.630882333	0.483444089	-0.225302537	0.055998791	0.425460158	FALSE
986	PF3D7_0800100.iso1.exon2.amp1_3980	-0.515061114	-0.590312657	0.526016568	-0.075251544	0.039384155	0.425460158	FALSE
987	PF3D7_0800100.iso1.exon2.amp2_4269	-0.70014262	-0.732585072	0.196702267	-0.032442452	0.415552329	0.548591681	FALSE
988	PF3D7_0800200.e1s1_8827	-0.292061501	-0.391885833	0.470186721	-0.099824333	0.062347806	0.425460158	FALSE
989	PF3D7_0800200.e1s2_5359	-0.964540975	-1.069054165	0.344739712	-0.10451319	0.161817097	0.425460158	FALSE
990	PF3D7_0800200.e2s1_5745	1.458398233	1.469842475	0.026805529	0.011444242	0.910787116	0.94034502	FALSE
991	PF3D7_0800300.e1s3_8831	-0.459595831	-0.639619019	0.479620402	-0.180023187	0.05776708	0.425460158	FALSE
992	PF3D7_0800300.e2s1_8914	1.877154017	1.830457604	0.099947388	-0.046696413	0.676853225	0.762207407	FALSE
993	PF3D7_0800400.iso1.exon3.amp1_128	-0.043122879	-0.194517323	0.324378177	-0.151394445	0.186612702	0.425460158	FALSE
994	PF3D7_0800500.iso1.exon2.amp1_3888	0.243799618	0.002600239	0.371760207	-0.241199379	0.133164795	0.425460158	FALSE
995	PF3D7_0800700.e1s1_6606	-0.269783405	-0.349902677	0.259146403	-0.080119272	0.286892068	0.468554861	FALSE
996	PF3D7_0800700.e3s1_5772	-0.524390563	-0.567659722	0.204230356	-0.043269159	0.398293947	0.53512996	FALSE
997	PF3D7_0801000.e2s1_5460	0.178292822	0.164093049	0.042492696	-0.014199774	0.859063395	0.900909526	FALSE
998	PF3D7_0801000.e2s2_6911	0.535395315	0.529528651	0.016688947	-0.005866664	0.944379078	0.961175657	FALSE
999	PF3D7_0801600.1o1_8124	-0.218039032	-0.38944417	0.404536744	-0.171405139	0.104270917	0.425460158	FALSE
1000	PF3D7_0801700.1o3_5645	-0.620682243	-0.661855833	0.233573304	-0.04117359	0.335597627	0.495994122	FALSE
1001	PF3D7_0801800_4835	-0.49952642	-0.601652979	0.232314047	-0.102126559	0.338138319	0.496695696	FALSE
1002	PF3D7_0801900.iso1.exon1.amp5_1622	-0.729079465	-0.839293338	0.265711383	-0.110213873	0.275268874	0.461911384	FALSE
1003	PF3D7_0802000.e1s1_5197	-0.019848313	-0.232256045	0.427643292	-0.212407732	0.087313835	0.425460158	FALSE
1004	PF3D7_0802000.e1s2_6642	-0.515935875	-0.551661122	0.075580985	-0.035725248	0.752373965	0.823106595	FALSE
1005	PF3D7_0802300.iso1.exon1.amp1_1413	-0.638361254	-0.66838339	0.099537126	-0.030022136	0.678098592	0.762745996	FALSE
1006	PF3D7_0802300.iso1.exon1.amp2_1927	-0.622936984	-0.681978067	0.212205417	-0.059041083	0.38053183	0.524591288	FALSE
1007	PF3D7_0802600.iso1.exon3.amp1_1656	-0.769275403	-0.786609036	0.186559705	-0.017333633	0.4395536	0.568933449	FALSE
1008	PF3D7_0802600.iso1.exon6.amp1_2681	-0.467729407	-0.50433931	0.287565504	-0.036609903	0.23910616	0.439641752	FALSE
1009	PF3D7_0802800.2o2_8482	-0.488362679	-0.564413405	0.180800041	-0.076050726	0.453562201	0.579138621	FALSE
1010	PF3D7_0803200.iso1.exon1.amp1_3327	-0.710053459	-0.788080198	0.365895447	-0.07802674	0.138992563	0.425460158	FALSE
1011	PF3D7_0803400.iso1.exon1.amp1_4581	1.411023136	1.128559131	0.426281987	-0.282464005	0.088241346	0.425460158	FALSE
1012	PF3D7_0803400.iso1.exon1.amp2_3948	1.24773979	0.999366069	0.486363681	-0.248373721	0.05468182	0.425460158	FALSE
1013	PF3D7_0804000.iso1.exon1.amp1_4456	0.077634706	-0.061137277	0.348856787	-0.138771983	0.157147476	0.425460158	FALSE
1014	PF3D7_0804000.iso1.exon2.amp1_3276	-0.495050626	-0.56445882	0.265427193	-0.069408194	0.275764671	0.462325552	FALSE
1015	PF3D7_0804500.e1s1_5404	-0.538614784	-0.639994136	0.238092322	-0.101379352	0.326590523	0.491815159	FALSE
1016	PF3D7_0804500.e2s2_5372	-0.460055872	-0.557349069	0.314484172	-0.097293197	0.199722652	0.426342335	FALSE
1017	PF3D7_0804500.e2s3_4800	-0.446468522	-0.474052432	0.085066025	-0.02758391	0.722616556	0.798037347	FALSE
1018	PF3D7_0804500.e3_7398	-0.545339696	-0.689092446	0.417518323	-0.14375275	0.09442197	0.425460158	FALSE
1019	PF3D7_0804600.1o1_6746	-0.275056735	-0.491254958	0.338602576	-0.216198223	0.168989189	0.425460158	FALSE
1020	PF3D7_0804800.e1s1_5442	-0.363090586	-0.472932227	0.445621263	-0.109841641	0.07584656	0.425460158	FALSE
1021	PF3D7_0804900.1o1_6159	-0.008660293	-0.243144911	0.398520475	-0.234484618	0.109129394	0.425460158	FALSE
1022	PF3D7_0805100.iso1.exon1.amp1_3626	-0.538099164	-0.561691155	0.117223048	-0.023591991	0.625323646	0.720677149	FALSE
1023	PF3D7_0805300.iso1.exon1.amp2_1057	-0.595865467	-0.62116342	0.199872606	-0.025297953	0.408226204	0.542753095	FALSE
1024	PF3D7_0805400.1o6_8716	-0.369974529	-0.464821884	0.302306392	-0.094847355	0.216853206	0.43001912	FALSE
1025	PF3D7_0805700.iso1.exon1.amp2_3399	-0.507100385	-0.589410671	0.2076412	-0.082310286	0.390631522	0.530683521	FALSE
1026	PF3D7_0806000.iso1.exon1.amp2_515	-0.763960527	-0.914216671	0.225423716	-0.150256144	0.35227834	0.507269912	FALSE
1027	PF3D7_0806200.10o10_8244	-0.651601548	-0.827898466	0.542096952	-0.176296918	0.034392348	0.425460158	FALSE
1028	PF3D7_0806300.iso1.exon1.amp1_485	-0.449661991	-0.555130935	0.242171206	-0.105468944	0.318608856	0.486345496	FALSE
1029	PF3D7_0806300.iso1.exon2.amp1_3830	-0.686066692	-0.685485903	0.002385894	0.000580789	0.992041401	0.995136856	FALSE
1030	PF3D7_0806500.e1s1_5475	-0.535679171	-0.54309301	0.022093547	-0.007413839	0.926415577	0.949787671	FALSE
1031	PF3D7_0806600.e2s1_5153	-0.331163041	-0.466250218	0.5128944	-0.135087177	0.043945377	0.425460158	FALSE
1032	PF3D7_0806600.e3s1_8038	-0.674058236	-0.804199278	0.447817931	-0.130141042	0.074541276	0.425460158	FALSE
1033	PF3D7_0806600.e5s1_5749	-0.362843811	-0.367729085	0.024026342	-0.004885273	0.920000858	0.945978147	FALSE
1034	PF3D7_0806700.iso1.exon1.amp1_1804	-0.470188007	-0.626721556	0.392800125	-0.156533549	0.11392856	0.425460158	FALSE
1035	PF3D7_0806700.iso1.exon3.amp3_1358	-0.591155322	-0.633583597	0.237589923	-0.042428275	0.327583348	0.492252791	FALSE
1036	PF3D7_0806800.e1s1_8932	-0.271842247	-0.329193083	0.153652006	-0.057350836	0.523188587	0.633976144	FALSE
1037	PF3D7_0806900.iso1.exon1.amp1_704	-0.75723743	-0.845313597	0.37361148	-0.088076167	0.131368519	0.425460158	FALSE
1038	PF3D7_0807100.iso1.exon1.amp2_3363	-0.638778666	-0.722315464	0.31060538	-0.083536799	0.205058329	0.426342335	FALSE
1039	PF3D7_0807700.1o5_5328	-0.305378747	-0.379141996	0.347199405	-0.073763249	0.159013745	0.425460158	FALSE
1040	PF3D7_0807700.5o5_5617	-0.243179816	-0.366792746	0.596013139	-0.12361293	0.021638029	0.425460158	FALSE
1041	PF3D7_0807800.e2s1_6602	0.574294124	0.336136777	0.439280384	-0.238157347	0.079728998	0.425460158	FALSE
1042	PF3D7_0808100.iso1.exon2.amp1_3829	-0.226401518	-0.31463746	0.284984216	-0.088235942	0.243177878	0.442773227	FALSE
1043	PF3D7_0808100.iso1.exon3.amp1_3963	-0.065062094	-0.297635506	0.540480858	-0.232573412	0.034866086	0.425460158	FALSE
1044	PF3D7_0808200.e1s1_9217	0.561172506	0.527067927	0.062232424	-0.034104579	0.794931011	0.853690753	FALSE
1045	PF3D7_0808400.1o1_4673	-0.540594695	-0.66711267	0.316125675	-0.126517975	0.197498129	0.426342335	FALSE
1046	PF3D7_0808600.e1s2_6520	-0.832318578	-0.832199775	0.000527264	0.000118803	0.998241183	0.998597316	FALSE
1047	PF3D7_0808600.e2s1_8343	0.738606672	0.549751723	0.534411928	-0.188854949	0.036699804	0.425460158	FALSE
1048	PF3D7_0808700.iso1.exon1.amp1_3035	0.460993623	0.257577187	0.33827442	-0.203416437	0.169379898	0.425460158	FALSE
1049	PF3D7_0808700.iso1.exon2.amp1_2238	-0.500963501	-0.583240369	0.426539935	-0.082276868	0.088064934	0.425460158	FALSE
1050	PF3D7_0808800.iso1.exon1.amp1_3594	0.035833935	-0.176002637	0.439927843	-0.211836572	0.079324649	0.425460158	FALSE
1051	PF3D7_0808900.iso1.exon1.amp1_4458	0.034721091	-0.148527772	0.42026149	-0.183248862	0.092447827	0.425460158	FALSE
1052	PF3D7_0809100.iso1.exon1.amp1_4184	0.202427622	0.047486368	0.328946437	-0.154941254	0.180797749	0.425460158	FALSE
1053	PF3D7_0809100.iso1.exon2.amp1_1077	-0.447387172	-0.499420319	0.272295512	-0.052033147	0.26396734	0.452977002	FALSE
1054	PF3D7_0809100.iso1.exon2.amp2_seg2_2600	-0.619534946	-0.657241654	0.25587204	-0.037706708	0.292822606	0.470619313	FALSE
1055	PF3D7_0809200.e1s2_6342	-0.123125529	-0.353757715	0.323844972	-0.230632185	0.187301133	0.425460158	FALSE
1056	PF3D7_0809500.iso1.exon1.amp1_3552	-0.490941367	-0.557113013	0.248406397	-0.066171646	0.306678544	0.47887335	FALSE
1057	PF3D7_0809600.iso1.exon1.amp4_seg1_2308	-0.289807386	-0.294300654	0.008156595	-0.004493268	0.972797399	0.98352639	FALSE
1058	PF3D7_0809900.iso1.exon1.amp1_seg2_287	0.172874212	-0.097803748	0.352324799	-0.270677961	0.153300902	0.425460158	FALSE
1059	PF3D7_0809900.iso1.exon1.amp2_seg2_576	0.139521852	-0.105545763	0.325343723	-0.245067616	0.185371254	0.425460158	FALSE
1060	PF3D7_0810300.2o4_8207	-0.236307067	-0.311641049	0.23736941	-0.075333982	0.328019793	0.492393447	FALSE
1061	PF3D7_0810800.e2s1_9231	-0.090597333	-0.252132352	0.390235815	-0.161535019	0.116138052	0.425460158	FALSE
1062	PF3D7_0810900.1.1o2_7001	-0.390622403	-0.477396834	0.313833493	-0.086774431	0.200609939	0.426342335	FALSE
1063	PF3D7_0811600.e2s1_6045	-0.53599287	-0.596866975	0.321969417	-0.060874105	0.189738945	0.425460158	FALSE
1064	PF3D7_0811600.e2s2_7207	0.229609843	0.077628717	0.410856467	-0.151981126	0.099370095	0.425460158	FALSE
1065	PF3D7_0812100.e1s1_5364	-0.080353678	-0.17130146	0.178238882	-0.090947782	0.459878744	0.584871284	FALSE
1066	PF3D7_0812400.e1s1_6614	-0.247365215	-0.353299917	0.290422465	-0.105934702	0.234660938	0.436467988	FALSE
1067	PF3D7_0812600.iso1.exon2.amp1_4140	-0.334751875	-0.326713062	0.027252297	0.008038813	0.909307148	0.939807314	FALSE
1068	PF3D7_0812700.1o1_7561	0.599565815	0.528701061	0.302105794	-0.070864754	0.217144765	0.43001912	FALSE
1069	PF3D7_0812900.2o2_8824	-0.403352587	-0.492743825	0.471126984	-0.089391238	0.061876969	0.425460158	FALSE
1070	PF3D7_0813400.e2s1_6043	-0.153112685	-0.274979813	0.201649055	-0.121867128	0.404158005	0.539390312	FALSE
1071	PF3D7_0813700.iso1.exon1.amp2_2781	-0.777828662	-0.900643186	0.318500942	-0.122814524	0.194314268	0.425460158	FALSE
1072	PF3D7_0813900.e2s1_8892	-0.546420773	-0.632123566	0.27940198	-0.085702793	0.252164566	0.449030278	FALSE
1073	PF3D7_0814600.e1s1_5462	-0.673304662	-0.840646176	0.318084787	-0.167341514	0.194869107	0.425460158	FALSE
1074	PF3D7_0815100.iso1.exon1.amp1_2474	-0.657809801	-0.705860826	0.152754455	-0.048051025	0.525589092	0.636060343	FALSE
1075	PF3D7_0815300.iso1.exon1.amp1_4308	-0.333601929	-0.384733326	0.185434037	-0.051131397	0.442269976	0.570959951	FALSE
1076	PF3D7_0815300.iso1.exon1.amp2_seg1_2595	-0.200630828	-0.253160967	0.152488668	-0.052530139	0.526301115	0.636624935	FALSE
1077	PF3D7_0815400.e1s1_8889	-0.800525812	-0.868144529	0.205073672	-0.067618718	0.396390312	0.533338981	FALSE
1078	PF3D7_0815500.3o5_7032	0.542388617	0.381549917	0.342252384	-0.160838701	0.164693163	0.425460158	FALSE
1079	PF3D7_0816100.1o4_7264	-0.671379786	-0.852000396	0.344457302	-0.18062061	0.162141552	0.425460158	FALSE
1080	PF3D7_0816200.1o1_6682	0.116740165	-0.108607362	0.432889339	-0.225347526	0.083819209	0.425460158	FALSE
1081	PF3D7_0816500.e2s1_4845	-0.441149515	-0.463005259	0.155270401	-0.021855744	0.518875733	0.629293925	FALSE
1082	PF3D7_0816600.e1s1_6325	-0.416799422	-0.449732984	0.139059502	-0.032933562	0.562964968	0.665727123	FALSE
1083	PF3D7_0816700.iso1.exon3.amp1_4095	-0.228007117	-0.447130202	0.393900094	-0.219123084	0.112991898	0.425460158	FALSE
1084	PF3D7_0817300.e1s3_7500	1.210834304	1.208025268	0.005289237	-0.002809036	0.982358005	0.989415174	FALSE
1085	PF3D7_0817700.iso1.exon14.amp1_1790	-0.889130831	-1.056539204	0.367364923	-0.167408373	0.137512599	0.425460158	FALSE
1086	PF3D7_0817700.iso1.exon15.amp1_2691	-0.40142222	-0.504150563	0.453899026	-0.102728343	0.071031549	0.425460158	FALSE
1087	PF3D7_0818500.e2_5381	0.015943959	-0.107927432	0.21671228	-0.123871391	0.370732125	0.51792712	FALSE
1088	PF3D7_0818900_4784	0.540531027	0.457672089	0.164817186	-0.082858938	0.493846786	0.609215305	FALSE
1089	PF3D7_0819600.2o2_6409	-0.453033019	-0.591451409	0.376865932	-0.13841839	0.128260376	0.425460158	FALSE
1090	PF3D7_0819800.e4s1_8607	-0.185691086	-0.316426985	0.713943229	-0.130735899	0.007571331	0.425460158	FALSE
1091	PF3D7_0820600.3o3_6147	-0.366648031	-0.478108743	0.388972648	-0.111460712	0.117239861	0.425460158	FALSE
1092	PF3D7_0821000.1o5_7907	-0.111348512	-0.171202604	0.183536121	-0.059854092	0.446873531	0.574259111	FALSE
1093	PF3D7_0821300.iso1.exon1.amp1_3317	-0.714929418	-0.819716335	0.605901689	-0.104786917	0.019848453	0.425460158	FALSE
1094	PF3D7_0821300.iso1.exon3.amp1_3898	-0.040019302	-0.112433699	0.338345611	-0.072414397	0.169295074	0.425460158	FALSE
1095	PF3D7_0821500.1o1_8442	0.241197588	0.041779124	0.402844148	-0.199418463	0.105618508	0.425460158	FALSE
1096	PF3D7_0821600.1o1_4738	-0.304994863	-0.411946085	0.293057839	-0.106951222	0.230617301	0.435427575	FALSE
1097	PF3D7_0822600.e2s1_7209	-0.895120462	-1.093802753	0.415383564	-0.19868229	0.095983645	0.425460158	FALSE
1098	PF3D7_0823300 (renamed, has duplicates)_6432	0.66207297	0.739469381	0.147131465	0.077396411	0.540766518	0.648271832	FALSE
1099	PF3D7_0823300.e1s1_7488	-0.185885071	-0.489840767	0.301495735	-0.303955696	0.218033343	0.43001912	FALSE
1100	PF3D7_0823300.e1s2_7199	0.307957448	0.103718958	0.320363834	-0.20423849	0.191846036	0.425460158	FALSE
1101	PF3D7_0823500.1o1_5877	0.238809607	0.177387783	0.196029686	-0.061421825	0.417117377	0.549364549	FALSE
1102	PF3D7_0823800_6524	-0.816512855	-0.911326941	0.657486289	-0.094814087	0.012580802	0.425460158	FALSE
1103	PF3D7_0823900.1o1_8440	0.252611073	0.026926761	0.518035431	-0.225684312	0.042103302	0.425460158	FALSE
1104	PF3D7_0824200.iso1.exon2.amp1_seg1_3174	-0.516890904	-0.569546496	0.188617618	-0.052655591	0.434614664	0.565503256	FALSE
1105	PF3D7_0824200.iso1.exon2.amp2_seg1_3463	-0.081591437	-0.235617268	0.389862269	-0.154025831	0.116462954	0.425460158	FALSE
1106	PF3D7_0824600.1o5_8431	-0.492205066	-0.567534806	0.264039485	-0.07532974	0.278195209	0.462832299	FALSE
1107	PF3D7_0824700.iso1.exon16.amp1_3245	0.043245381	-0.225847116	0.405426044	-0.269092496	0.103568864	0.425460158	FALSE
1108	PF3D7_0825200.iso1.exon1.amp1_2065	-0.388963999	-0.479732365	0.448580084	-0.090768366	0.07409309	0.425460158	FALSE
1109	PF3D7_0825200.iso1.exon4.amp1_4086	-0.468241902	-0.508476345	0.20056934	-0.040234443	0.406627472	0.541140688	FALSE
1110	PF3D7_0825600.iso1.exon1.amp1_3549	-0.438133429	-0.444847828	0.047297141	-0.006714399	0.843341813	0.889665329	FALSE
1111	PF3D7_0825800.iso1.exon1.amp1_1307	0.163956956	0.175606709	0.022786216	0.011649754	0.924116067	0.948817815	FALSE
1112	PF3D7_0826000.iso1.exon1.amp2_3371	-0.19287366	-0.203751842	0.029432845	-0.010878182	0.902088859	0.936142547	FALSE
1113	PF3D7_0826100.s1_5414	-0.611096005	-0.790293547	0.22414747	-0.179197541	0.3549416	0.508758151	FALSE
1114	PF3D7_0826100.s2_5703	0.345529203	3.90E-05	0.463356381	-0.345490177	0.065866063	0.425460158	FALSE
1115	PF3D7_0826100.s3_8299	-0.252538183	-0.458743738	0.408264486	-0.206205555	0.101355396	0.425460158	FALSE
1116	PF3D7_0826100.s4_8588	0.463915112	0.357083271	0.299980873	-0.106831841	0.220252126	0.43001912	FALSE
1117	PF3D7_0826100.s8_8594	-0.175656604	-0.426028453	0.499571712	-0.250371849	0.049068873	0.425460158	FALSE
1118	PF3D7_0826300.1o1_6730	0.475808106	0.305301111	0.355637838	-0.170506995	0.149699417	0.425460158	FALSE
1119	PF3D7_0826400.iso1.exon6.amp1_665	-0.332931154	-0.442494641	0.425640167	-0.109563486	0.088681637	0.425460158	FALSE
1120	PF3D7_0826500.e1s1_5469	-0.523307238	-0.612048881	0.156565119	-0.088741643	0.515439906	0.626178955	FALSE
1121	PF3D7_0826500.e1s2_5180	-0.230443737	-0.290821824	0.055858705	-0.060378086	0.815498024	0.867801313	FALSE
1122	PF3D7_0826700.e2_6241	0.07604663	-0.051511494	0.366929109	-0.127558123	0.137950137	0.425460158	FALSE
1123	PF3D7_0827100.s2_5089	-0.40760764	-0.415689503	0.022494772	-0.008081862	0.925083515	0.949463462	FALSE
1124	PF3D7_0827600.2o2_6223	1.599557257	1.376659094	0.483666676	-0.222898163	0.055897382	0.425460158	FALSE
1125	PF3D7_0827800.e1s1_6935	-0.577780167	-0.610120166	0.1522842	-0.032339999	0.526849237	0.636686705	FALSE
1126	PF3D7_0827800.e1s3_6929	-0.186167847	-0.324656452	0.239204824	-0.138488605	0.32439962	0.490095116	FALSE
1127	PF3D7_0827900.e2_7119	-0.153929168	-0.282500962	0.453195885	-0.128571794	0.071429687	0.425460158	FALSE
1128	PF3D7_0828100.iso1.exon3.amp1_1012	-0.371926264	-0.362617562	0.018996034	0.009308702	0.936706556	0.955301431	FALSE
1129	PF3D7_0828200.iso1.exon1.amp2_1624	-0.179339006	-0.216827799	0.235064969	-0.037488793	0.332605403	0.494499231	FALSE
1130	PF3D7_0828400.1o1_8192	0.090861399	-0.013980175	0.214480691	-0.104841574	0.375562967	0.522360397	FALSE
1131	PF3D7_0828500.4o4_8157	-0.851063029	-1.036539796	0.491735586	-0.185476766	0.052331956	0.425460158	FALSE
1132	PF3D7_0829000.e2s1_7406	-0.748361076	-0.910247522	0.217220389	-0.161886446	0.369638094	0.51792712	FALSE
1133	PF3D7_0829600.1o1_8708	-0.540161813	-0.580916553	0.167708229	-0.04075474	0.486408289	0.604690894	FALSE
1134	PF3D7_0830600.2o2_6153	-0.096396593	-0.253179903	0.433418326	-0.15678331	0.083473765	0.425460158	FALSE
1135	PF3D7_0830800.iso1.exon1.amp1_1373	-0.188702777	-0.18385417	0.021512873	0.004848608	0.928343807	0.950721708	FALSE
1136	PF3D7_0830800.iso1.exon1.amp2_4505	-0.618927521	-0.703739067	0.276735057	-0.084811546	0.256546115	0.450960176	FALSE
1137	PF3D7_0830800.iso1.exon2.amp1_1892	-0.530934406	-0.588881779	0.504306975	-0.057947373	0.047188267	0.425460158	FALSE
1138	PF3D7_0831100.iso1.exon1.amp2_3348	-0.708039946	-0.784978036	0.34079227	-0.07693809	0.166400928	0.425460158	FALSE
1139	PF3D7_0831100.iso1.exon2.amp1_4116	0.092280604	0.095222834	0.009670517	0.00294223	0.967751168	0.979629703	FALSE
1140	PF3D7_0831200.iso1.exon1.amp1_2190	0.075332093	-0.123127452	0.3922363	-0.198459545	0.114411253	0.425460158	FALSE
1141	PF3D7_0831300.2o2_7356	-0.377070461	-0.283307569	0.113685787	0.093762892	0.635724694	0.730562312	FALSE
1142	PF3D7_0831400.2o2_8450	-0.141808678	-0.100235199	0.058192465	0.041573479	0.807950359	0.862729946	FALSE
1143	PF3D7_0831500.iso1.exon2.amp1_2951	0.606395597	0.571700788	0.122941227	-0.03469481	0.6086812	0.707784045	FALSE
1144	PF3D7_0831500.iso1.exon3.amp1_1846	-0.681625698	-0.746709283	0.169568052	-0.065083585	0.481658158	0.602394949	FALSE
1145	PF3D7_0831700.2o2_5026	-0.250517352	-0.272993885	0.075491965	-0.022476533	0.752655246	0.823106595	FALSE
1146	PF3D7_0831800.2o2_5849	-0.337292324	-0.322676991	0.030719698	0.014615334	0.897833073	0.933107464	FALSE
1147	PF3D7_0832000.iso1.exon3.amp1_1848	-0.402536088	-0.575251329	0.413889563	-0.172715241	0.09708993	0.425460158	FALSE
1148	PF3D7_0832300.2o2_7858	-0.064755733	-0.135488565	0.217726213	-0.070732832	0.368551159	0.517386696	FALSE
1149	PF3D7_0832400.iso1.exon3.amp1_1853	0.452970181	0.188511376	0.344338951	-0.264458804	0.162277682	0.425460158	FALSE
1150	PF3D7_0832800.iso1.exon3.amp1_1854	0.899219785	0.629660435	0.478454025	-0.26955935	0.058316458	0.425460158	FALSE
1151	PF3D7_0832900.iso1.exon3.amp1_986	1.015228707	0.705632606	0.340552636	-0.309596101	0.166682589	0.425460158	FALSE
1152	PF3D7_0833000.iso1.exon3.amp1_3881	0.665150806	0.342717634	0.322931676	-0.322433173	0.188485053	0.425460158	FALSE
1153	PF3D7_0833100.iso1.exon3.amp1_4170	0.128588665	-0.233803365	0.439592942	-0.36239203	0.079533573	0.425460158	FALSE
1154	PF3D7_0833200.iso1.exon3.amp1_3030	-0.053617263	-0.22619525	0.355635619	-0.172577986	0.149701805	0.425460158	FALSE
1155	PF3D7_0833300.iso1.exon1.amp1_1870	0.794353795	0.750467933	0.109185563	-0.043885862	0.649071115	0.7401364	FALSE
1156	PF3D7_0833400.iso1.exon3.amp1_4185	-0.014550886	-0.115158351	0.386025132	-0.100607464	0.119845674	0.425460158	FALSE
1157	PF3D7_0833500.iso1.exon3.amp1_3614	0.953513512	0.745759526	0.572900385	-0.207753986	0.026434738	0.425460158	FALSE
1158	PF3D7_0900100.iso1.exon2.amp1_151	1.189603451	0.935959213	0.489986898	-0.253644238	0.053086609	0.425460158	FALSE
1159	PF3D7_0900200.e2s1_8924	0.491428759	0.192474932	0.488257184	-0.298953827	0.053842803	0.425460158	FALSE
1160	PF3D7_0900300.iso1.exon1.amp1_1001	-0.089364562	-0.260612741	0.389766628	-0.171248179	0.116546265	0.425460158	FALSE
1161	PF3D7_0900400.iso1.exon2.amp1_1867	-0.177020785	-0.264722241	0.520753606	-0.087701456	0.041158361	0.425460158	FALSE
1162	PF3D7_0900500.iso1.exon1.amp1_4464	0.583211429	0.338962751	0.45156246	-0.244248678	0.072362278	0.425460158	FALSE
1163	PF3D7_0900600.iso1.exon1.amp1_424	-0.063221047	-0.306941413	0.40487102	-0.243720366	0.104006542	0.425460158	FALSE
1164	PF3D7_0900700.iso1.exon1.amp1_2726	-0.283633656	-0.508572643	0.348253901	-0.224938986	0.157824243	0.425460158	FALSE
1165	PF3D7_0900900.iso1.exon1.amp1_4454	1.142611338	0.835441426	0.409038121	-0.307169912	0.100759264	0.425460158	FALSE
1166	PF3D7_0901000.iso1.exon1.amp1_3010	1.420516847	1.24093481	0.344790323	-0.179582037	0.161759008	0.425460158	FALSE
1167	PF3D7_0901100.iso1.exon1.amp1_3608	-0.085625517	-0.237380901	0.452744209	-0.151755385	0.071686489	0.425460158	FALSE
1168	PF3D7_0901300.iso1.exon2.amp1_1859	-0.122543488	-0.303543095	0.365086183	-0.180999607	0.139813294	0.425460158	FALSE
1169	PF3D7_0901400.iso1.exon2.amp1_711	-0.475303381	-0.599261544	0.654468251	-0.123958163	0.012923966	0.425460158	FALSE
1170	PF3D7_0901500.iso1.exon2.amp1_4476	0.542757941	0.254993519	0.356591804	-0.287764422	0.148675529	0.425460158	FALSE
1171	PF3D7_0901600.iso1.exon2.amp1_1269	0.77383034	0.433705413	0.368211705	-0.340124927	0.136665802	0.425460158	FALSE
1172	PF3D7_0901800.2o2_8725	0.788816918	0.809458547	0.05302045	0.020641628	0.824702433	0.87560228	FALSE
1173	PF3D7_0902200.2o3_7910	0.391761546	0.141405264	0.373454564	-0.250356282	0.131519977	0.425460158	FALSE
1174	PF3D7_0902300.2o3_7037	-0.276438061	-0.320733516	0.371912601	-0.044295455	0.13301615	0.425460158	FALSE
1175	PF3D7_0902400.iso1.exon2.amp1_1014	-0.627399519	-0.695306817	0.448073524	-0.067907299	0.074390706	0.425460158	FALSE
1176	PF3D7_0902600.2o3_8194	-0.448886992	-0.478656502	0.164345764	-0.029769509	0.495065997	0.610450772	FALSE
1177	PF3D7_0902800.2o4_7652	-0.178057587	-0.17708443	0.001574467	0.000973157	0.994748015	0.996899679	FALSE
1178	PF3D7_0902800.4o4_7941	0.035701303	-0.051505966	0.197541788	-0.087207269	0.413604135	0.546325631	FALSE
1179	PF3D7_0902900.1o1_8123	-0.08882106	-0.194917517	0.235353126	-0.106096458	0.332029542	0.493904952	FALSE
1180	PF3D7_0903000.1o1_9002	0.104169652	0.05955931	0.214104253	-0.044610342	0.376382025	0.522980772	FALSE
1181	PF3D7_0903000_5973	0.115609304	0.092760804	0.109802555	-0.0228485	0.647233865	0.738700821	FALSE
1182	PF3D7_0903300.iso1.exon1.amp3_3123	-0.384612911	-0.376877088	0.023009196	0.007735823	0.923375968	0.948720329	FALSE
1183	PF3D7_0903300.iso1.exon1.amp4_1038	0.197660791	0.257515205	0.08592887	0.059854414	0.719931273	0.796326347	FALSE
1184	PF3D7_0903400.e1s3_8886	-0.172395506	-0.269012437	0.23993718	-0.096616932	0.322963062	0.488714747	FALSE
1185	PF3D7_0903500.e1s1_7220	1.328527793	1.067012122	0.282047365	-0.261515671	0.247874813	0.446457304	FALSE
1186	PF3D7_0903500.e1s2_7214	1.095146977	1.133517952	0.098535599	0.038370975	0.681142792	0.764581421	FALSE
1187	PF3D7_0903700.e3s1_4884	0.276980311	0.110967914	0.456390287	-0.166012397	0.069636831	0.425460158	FALSE
1188	PF3D7_0903800.iso1.exon2.amp1_1662	-0.77841755	-0.918838055	0.385309797	-0.140420505	0.120485486	0.425460158	FALSE
1189	PF3D7_0903800.iso1.exon2.amp2_3644	-0.05539707	-0.196857886	0.243672639	-0.141460816	0.315706143	0.4840022	FALSE
1190	PF3D7_0904900.e1s1_8018	-0.18265924	-0.235087151	0.329136275	-0.052427911	0.180559312	0.425460158	FALSE
1191	PF3D7_0904900.e1s3_6567	-0.533812618	-0.626480971	0.4479918	-0.092668354	0.07443882	0.425460158	FALSE
1192	PF3D7_0905100.iso1.exon2.amp1_4406	-0.042848854	-0.124129227	0.162243948	-0.081280374	0.500523081	0.614477547	FALSE
1193	PF3D7_0905100.iso1.exon3.amp1_1647	0.94987919	0.771848153	0.320749675	-0.178031038	0.191337972	0.425460158	FALSE
1194	PF3D7_0905300.s5_9157	-0.515942065	-0.536438678	0.058093236	-0.020496613	0.808270888	0.862729946	FALSE
1195	PF3D7_0905300.s6_8296	0.475176153	0.443957043	0.108310755	-0.03121911	0.651680069	0.742507482	FALSE
1196	PF3D7_0905300.s7_8001	-0.245641962	-0.377907498	0.374157687	-0.132265536	0.130842465	0.425460158	FALSE
1197	PF3D7_0905400.e7s1_7466	0.281982774	0.239302572	0.17340493	-0.042680203	0.471945899	0.59315836	FALSE
1198	PF3D7_0905600.2o2_5648	-0.628960637	-0.737456819	0.40153755	-0.108496181	0.106669053	0.425460158	FALSE
1199	PF3D7_0905900.iso1.exon1.amp1_3487	-0.316733201	-0.368900514	0.251741723	-0.052167312	0.300430748	0.474061799	FALSE
1200	PF3D7_0905900.iso1.exon1.amp2_seg1_1439	-0.189652267	-0.249247772	0.213838518	-0.059595506	0.376960938	0.52339629	FALSE
1201	PF3D7_0906200.1o1_7631	-0.238216756	-0.419272743	0.263537928	-0.181055986	0.279077574	0.462832299	FALSE
1202	PF3D7_0906300.1o1_4700	0.156365303	0.108721091	0.107166074	-0.047644212	0.655100898	0.744891694	FALSE
1203	PF3D7_0906400.e1s1_9120	-0.405063224	-0.614696332	0.425359296	-0.209633109	0.088874922	0.425460158	FALSE
1204	PF3D7_0906500.1o1_4999	1.51761397	1.216396888	0.371199617	-0.301217082	0.133712802	0.425460158	FALSE
1205	PF3D7_0906900.1o2_5563	-0.418541684	-0.465417589	0.171997536	-0.046875905	0.475494702	0.596184146	FALSE
1206	PF3D7_0907200.e1s2_8934	0.178249537	0.008053548	0.46360267	-0.170195989	0.065736164	0.425460158	FALSE
1207	PF3D7_0907600.iso1.exon2.amp1_4206	-0.465811365	-0.538328092	0.1471036	-0.072516727	0.540842321	0.648271832	FALSE
1208	PF3D7_0907700.e1s1_8630	-0.10132382	-0.190845348	0.301853819	-0.089521528	0.217511433	0.43001912	FALSE
1209	PF3D7_0908200.iso1.exon2.amp1_4259	-0.872071862	-0.894119716	0.104899021	-0.022047854	0.661899176	0.750188072	FALSE
1210	PF3D7_0908300.iso2.exon2.amp1_3507	-0.181551303	-0.189436869	0.026154383	-0.007885567	0.912944715	0.941192625	FALSE
1211	PF3D7_0908400.2o2_5815	-0.333307295	-0.38818146	0.116045798	-0.054874165	0.628776387	0.724046421	FALSE
1212	PF3D7_0908500.e15s1_7738	0.044916383	-0.024525531	0.18782081	-0.069441914	0.436522825	0.566876665	FALSE
1213	PF3D7_0908500.e17s1_8622	-0.426682529	-0.543041153	0.477957801	-0.116358625	0.058551616	0.425460158	FALSE
1214	PF3D7_0908500.e4s1_8616	-0.578037651	-0.735215118	0.52072168	-0.157177466	0.041169345	0.425460158	FALSE
1215	PF3D7_0908700.iso1.exon6.amp1_4386	-0.589940029	-0.620944902	0.25997402	-0.031004873	0.285407168	0.467601669	FALSE
1216	PF3D7_0909100.1o1_4745	-0.345712171	-0.397910419	0.209528343	-0.052198248	0.386434292	0.528308997	FALSE
1217	PF3D7_0909500_5686	0.981363741	1.026519558	0.059606412	0.045155817	0.803386895	0.860735118	FALSE
1218	PF3D7_0909600.3o3_8193	-0.348503776	-0.49699925	0.555750384	-0.148495474	0.030622748	0.425460158	FALSE
1219	PF3D7_0909700.iso1.exon1.amp1_1703	0.880110524	0.671930158	0.516607474	-0.208180365	0.042607686	0.425460158	FALSE
1220	PF3D7_0909900.iso1.exon1.amp1_1689	-0.329862174	-0.444000061	0.361660819	-0.114137887	0.143332317	0.425460158	FALSE
1221	PF3D7_0909900.iso1.exon1.amp2_2197	-0.332526629	-0.413595759	0.311706527	-0.081069131	0.203532223	0.426342335	FALSE
1222	PF3D7_0910000.iso1.exon1.amp2_1355	-0.406770403	-0.469770956	0.36723583	-0.063000553	0.137642081	0.425460158	FALSE
1223	PF3D7_0910200.iso1.exon1.amp1_1395	0.064243562	-0.054224973	0.257343613	-0.118468535	0.29014627	0.469728718	FALSE
1224	PF3D7_0910400.iso1.exon1.amp2_seg1_2878	-0.603174386	-0.633103608	0.174946792	-0.029929222	0.468076353	0.591476383	FALSE
1225	PF3D7_0910400.iso1.exon1.amp2_seg2_864	-0.242216035	-0.33265996	0.39865196	-0.090443925	0.109021161	0.425460158	FALSE
1226	PF3D7_0910900.iso1.exon2.amp1_3342	-0.443746914	-0.320494406	0.201136035	0.123252508	0.405330135	0.540183317	FALSE
1227	PF3D7_0911100.e1s1_9127	-0.509458053	-0.683801337	0.328343468	-0.174343284	0.181556773	0.425460158	FALSE
1228	PF3D7_0911300.e1s2_8013	-0.189234719	-0.435142242	0.323633931	-0.245907524	0.187574177	0.425460158	FALSE
1229	PF3D7_0911900.2o2_4716	1.644435358	1.484467695	0.327899606	-0.159967664	0.182117157	0.425460158	FALSE
1230	PF3D7_0911900.e2_7125	0.553499218	0.313952866	0.491122439	-0.239546352	0.052595443	0.425460158	FALSE
1231	PF3D7_0912500.2o7_6421	-0.418057787	-0.407632757	0.038850827	0.01042503	0.8710218	0.909964652	FALSE
1232	PF3D7_0912600.iso1.exon1.amp1_741	-0.265578811	-0.351703125	0.174430281	-0.086124314	0.469370481	0.592310905	FALSE
1233	PF3D7_0912600.iso1.exon2.amp1_4466	-1.007463029	-1.027859026	0.070290846	-0.020395997	0.769150332	0.83457323	FALSE
1234	PF3D7_0912800.1o1_8778	-0.340267177	-0.49393069	0.23973212	-0.153663513	0.323364842	0.488795158	FALSE
1235	PF3D7_0912900.e2s1_6018	-0.287058963	-0.391881717	0.418872904	-0.104822753	0.093442578	0.425460158	FALSE
1236	PF3D7_0913500.3o3_7012	-0.385698482	-0.502107298	0.419883433	-0.116408816	0.092717736	0.425460158	FALSE
1237	PF3D7_0914000.1o1_7665	-0.665365141	-0.77355079	0.276884988	-0.108185649	0.25629827	0.450960176	FALSE
1238	PF3D7_0914100.iso1.exon1.amp1_2279	-0.72755932	-0.851210091	0.398224781	-0.123650771	0.109373135	0.425460158	FALSE
1239	PF3D7_0914200.3o4_7023	-0.229715812	-0.303085344	0.20933336	-0.073369531	0.386866562	0.528497805	FALSE
1240	PF3D7_0914800.1o1_6098	-0.645503032	-0.782516171	0.343688361	-0.13701314	0.163027682	0.425460158	FALSE
1241	PF3D7_0915300.iso1.exon1.amp1_149	-0.201020583	-0.267607576	0.159662205	-0.066586993	0.507273582	0.620050184	FALSE
1242	PF3D7_0915400.e1s1_6348	0.184962195	-0.006076988	0.345230104	-0.191039183	0.161254966	0.425460158	FALSE
1243	PF3D7_0916200.iso1.exon1.amp1_2352	-0.39939176	-0.468165076	0.333791306	-0.068773316	0.174791832	0.425460158	FALSE
1244	PF3D7_0916200.iso1.exon2.amp1_2241	-0.175438765	-0.309560554	0.515418589	-0.134121789	0.043031865	0.425460158	FALSE
1245	PF3D7_0916200.iso1.exon2.amp2_1904	-0.335560262	-0.372747551	0.182293012	-0.037187289	0.449904847	0.575516967	FALSE
1246	PF3D7_0916700.e1s1_6618	-0.322088788	-0.460564241	0.287216565	-0.138475453	0.239653494	0.439990201	FALSE
1247	PF3D7_0916800.iso1.exon1.amp1_3204	-0.147618593	-0.269884015	0.28148403	-0.122265422	0.248783623	0.446457304	FALSE
1248	PF3D7_0917000.iso1.exon1.amp2_1923	-0.149343519	-0.388598989	0.374622474	-0.23925547	0.130396229	0.425460158	FALSE
1249	PF3D7_0917200.2o2_4677	-0.473399235	-0.55904648	0.216606028	-0.085647245	0.370961176	0.51792712	FALSE
1250	PF3D7_0917300.1o1_6428	-0.535897171	-0.553593612	0.039684845	-0.017696441	0.868280276	0.908454438	FALSE
1251	PF3D7_0917500.e1s1_7508	-0.650234815	-0.720412391	0.264226787	-0.070177576	0.27786623	0.462670373	FALSE
1252	PF3D7_0917900.e2_8279	-0.05982777	-0.161203294	0.324609685	-0.101375523	0.186314433	0.425460158	FALSE
1253	PF3D7_0918000.e1s1_8347	-0.257257393	-0.43652209	0.453226919	-0.179264697	0.071412073	0.425460158	FALSE
1254	PF3D7_0918300.e2s1_6599	0.858074356	0.497639369	0.518961676	-0.360434988	0.04177908	0.425460158	FALSE
1255	PF3D7_0918900.e1s1_7198	-0.32999309	-0.367267432	0.105969949	-0.037274342	0.658683918	0.747752917	FALSE
1256	PF3D7_0918900.e1s2_7481	0.283523443	0.159655112	0.399087937	-0.123868331	0.108662943	0.425460158	FALSE
1257	PF3D7_0919200.iso1.exon1.amp1_389	-0.596055191	-0.701266877	0.382446801	-0.105211686	0.123075446	0.425460158	FALSE
1258	PF3D7_0919400.e1s1_4873	-0.400515495	-0.49203561	0.380078534	-0.091520115	0.125253522	0.425460158	FALSE
1259	PF3D7_0919800.iso1.exon1.amp1_3111	-0.340040849	-0.454362609	0.214905937	-0.11432176	0.37463916	0.521592951	FALSE
1260	PF3D7_0919800.iso1.exon1.amp2_seg1_1133	0.008640892	-0.156470102	0.265380926	-0.165110994	0.275845452	0.462325552	FALSE
1261	PF3D7_0919900.iso1.exon1.amp1_1105	-0.216347433	-0.357036693	0.337702365	-0.14068926	0.170062762	0.425460158	FALSE
1262	PF3D7_0919900.iso1.exon1.amp4_1035	-0.414185218	-0.422289159	0.042370969	-0.008103941	0.859462547	0.900909526	FALSE
1263	PF3D7_0920300.1o4_5819	-0.462035228	-0.647959774	0.344454482	-0.185924545	0.162144793	0.425460158	FALSE
1264	PF3D7_0920400.s1_5698	-0.659049332	-0.698486102	0.103013539	-0.03943677	0.667576496	0.753576689	FALSE
1265	PF3D7_0920800.e1s1_4875	-0.302973991	-0.428100071	0.466109941	-0.12512608	0.0644268	0.425460158	FALSE
1266	PF3D7_0920900.iso1.exon2.amp1_3864	-0.048359937	-0.250100282	0.529227984	-0.201740344	0.03833656	0.425460158	FALSE
1267	PF3D7_0921200.2o6_8242	-0.727553047	-0.811916836	0.389034704	-0.084363789	0.117185524	0.425460158	FALSE
1268	PF3D7_0921400.e1_5664	-0.548814169	-0.650894833	0.229003307	-0.102080664	0.344882214	0.501054953	FALSE
1269	PF3D7_0921800.1o3_8466	-0.937098243	-0.992951894	0.227605639	-0.05585365	0.34775713	0.50393333	FALSE
1270	PF3D7_0922100.e1s2_8955	-1.147527227	-1.273531764	0.174598796	-0.126004537	0.468948028	0.592044246	FALSE
1271	PF3D7_0922200.e1s1_7191	-0.424667181	-0.565439321	0.338814701	-0.14077214	0.168737021	0.425460158	FALSE
1272	PF3D7_0922500_7709	-0.353402502	-0.377107214	0.068386842	-0.023704711	0.775217874	0.839270625	FALSE
1273	PF3D7_0922800.iso1.exon4.amp3_229	-0.247241787	-0.393030695	0.21712935	-0.145788907	0.369833954	0.51792712	FALSE
1274	PF3D7_0923800.1.e1s1_7487	0.144717967	0.158062286	0.028210833	0.013344319	0.906133051	0.938255936	FALSE
1275	PF3D7_0923800.iso2.exon1.amp1_446	0.02928921	-0.085274542	0.322060428	-0.114563751	0.189620065	0.425460158	FALSE
1276	PF3D7_0924000.iso1.exon1.amp1_3692	-0.744603049	-0.623496878	0.225165278	0.121106171	0.352816529	0.507269912	FALSE
1277	PF3D7_0924000.iso1.exon1.amp2_3981	-0.714539302	-0.772375237	0.169293805	-0.057835935	0.482356871	0.602549047	FALSE
1278	PF3D7_0924000.iso1.exon2.amp1_2373	-0.511729956	-0.637850202	0.315173938	-0.126120246	0.198785479	0.426342335	FALSE
1279	PF3D7_0924200.iso1.exon1.amp1_2570	-0.393357292	-0.500079628	0.22473156	-0.106722336	0.35372101	0.507822706	FALSE
1280	PF3D7_0924600.iso1.exon1.amp1_2177	0.632475475	0.393698193	0.423065629	-0.238777281	0.090467222	0.425460158	FALSE
1281	PF3D7_0924600.iso1.exon2.amp2_seg1_2289	-0.47028866	-0.52028921	0.153169596	-0.05000055	0.524478031	0.635264103	FALSE
1282	PF3D7_0925300.1o1_6180	-0.397789887	-0.485570104	0.216150543	-0.087780216	0.371944172	0.518355596	FALSE
1283	PF3D7_0925800.e1s1_9121	-0.482389043	-0.56986105	0.159240182	-0.087472006	0.508381988	0.621118766	FALSE
1284	PF3D7_0925900.e2s1_8042	-0.427957163	-0.599016862	0.458895371	-0.1710597	0.068259122	0.425460158	FALSE
1285	PF3D7_0926200.iso1.exon1.amp1_3505	-0.038815766	-0.124046956	0.255841532	-0.08523119	0.292878281	0.470619313	FALSE
1286	PF3D7_0926500.iso1.exon1.amp2_2495	-0.478872064	-0.527570487	0.20979609	-0.048698423	0.385841228	0.5282709	FALSE
1287	PF3D7_0927300.e1s1_7797	-0.98697439	-1.055402598	0.330054865	-0.068428208	0.179409149	0.425460158	FALSE
1288	PF3D7_0927700.1o1_7283	-0.261395658	-0.387083386	0.283893221	-0.125687728	0.244914701	0.443631021	FALSE
1289	PF3D7_0927800.2o2_4680	-0.557635931	-0.635060624	0.26642722	-0.077424693	0.274022963	0.461213957	FALSE
1290	PF3D7_0927900.1o1_4984	-0.569695503	-0.665881975	0.299572063	-0.096186472	0.220853915	0.43001912	FALSE
1291	PF3D7_0928600.1o1_6100	-0.690679033	-0.801753938	0.283622119	-0.111074905	0.245347752	0.443841997	FALSE
1292	PF3D7_0928700.iso1.exon1.amp1_3151	-0.648690994	-0.60931442	0.248777101	0.039376573	0.305979532	0.47887335	FALSE
1293	PF3D7_0929000.2o2_8472	-0.04108051	-0.137430769	0.216411209	-0.096350258	0.371381405	0.518086299	FALSE
1294	PF3D7_0929000.e2_5102	-0.227572229	-0.383321706	0.318435624	-0.155749477	0.194401268	0.425460158	FALSE
1295	PF3D7_0929600.2o2_4963	-0.63553166	-0.698019282	0.332227429	-0.062487623	0.176712508	0.425460158	FALSE
1296	PF3D7_0929800.iso1.exon1.amp1_4123	-0.138996444	-0.252840353	0.277435965	-0.113843909	0.25538903	0.450960176	FALSE
1297	PF3D7_0929900.iso1.exon1.amp1_1496	-0.233738643	-0.284675674	0.171944369	-0.050937032	0.475629078	0.596184146	FALSE
1298	PF3D7_0930100.iso1.exon1.amp2_192	-0.505782091	-0.563622456	0.320657697	-0.057840365	0.191458989	0.425460158	FALSE
1299	PF3D7_0930200.iso1.exon4.amp1_2997	-0.360767889	-0.404517804	0.180020098	-0.043749915	0.455480091	0.581058315	FALSE
1300	PF3D7_0930300.s1_9167	-0.376692786	-0.441474738	0.120996238	-0.064781952	0.614317867	0.711502396	FALSE
1301	PF3D7_0930300.s2_8884	1.063215334	1.070695957	0.013628966	0.007480623	0.954564007	0.96816705	FALSE
1302	PF3D7_0930600.iso1.exon5.amp1_2100	-0.357775999	-0.469472463	0.413768854	-0.111696464	0.097179797	0.425460158	FALSE
1303	PF3D7_0930700.iso1.exon1.amp1_702	-0.514929837	-0.606441595	0.401904333	-0.091511758	0.106373241	0.425460158	FALSE
1304	PF3D7_0930700.iso1.exon2.amp1_2944	-0.457315782	-0.55292664	0.272138835	-0.095610858	0.264232166	0.453154124	FALSE
1305	PF3D7_0931300.1o1_6427	-0.659566005	-0.630086915	0.090230863	0.029479091	0.706599696	0.787169466	FALSE
1306	PF3D7_0931300_6263	-0.672053845	-0.711111838	0.099484401	-0.039057993	0.678258711	0.762745996	FALSE
1307	PF3D7_0931400.3o4_4980	-0.057475341	-0.021757579	0.098213406	0.035717762	0.682123324	0.76506952	FALSE
1308	PF3D7_0931600.iso1.exon2.amp1_2996	-0.578060012	-0.54975104	0.082945063	0.028308972	0.729233048	0.802897461	FALSE
1309	PF3D7_0931700.2o3_7353	-0.467034209	-0.462868952	0.014691459	0.004165257	0.951026566	0.966538054	FALSE
1310	PF3D7_0931800.e1s1_7757	-0.429396042	-0.557064593	0.550857055	-0.127668552	0.031927046	0.425460158	FALSE
1311	PF3D7_0932100.2o5_9117	-0.10409769	-0.339002703	0.562697847	-0.234905013	0.028856335	0.425460158	FALSE
1312	PF3D7_0932300.e1s1_4887	-0.383801631	-0.397940467	0.057741506	-0.014138836	0.809407324	0.863614207	FALSE
1313	PF3D7_0932700.iso1.exon1.amp2_4526	-0.568728829	-0.641520222	0.431061039	-0.072791393	0.085022872	0.425460158	FALSE
1314	PF3D7_0933100.4o4_8227	-0.602977027	-0.683346716	0.389925863	-0.080369689	0.116407587	0.425460158	FALSE
1315	PF3D7_0933500.s1_5707	-0.248455345	-0.325725612	0.353804717	-0.077270267	0.151683352	0.425460158	FALSE
1316	PF3D7_0933600.e1s1_8054	-0.193954209	-0.250210354	0.223241722	-0.056256145	0.356840095	0.509460095	FALSE
1317	PF3D7_0933900.4o4_5828	0.036266227	-0.105658202	0.2921398	-0.141924429	0.232019744	0.436172617	FALSE
1318	PF3D7_0934300.1o1_7830	-0.518318557	-0.651329518	0.464290643	-0.133010962	0.065374527	0.425460158	FALSE
1319	PF3D7_0935600.1o2_7901	0.197142789	0.047708008	0.235659116	-0.14943478	0.331418812	0.4935201	FALSE
1320	PF3D7_0935800.e1_5085	-0.53998312	-0.621122716	0.19964784	-0.081139596	0.408742824	0.543071308	FALSE
1321	PF3D7_0935800.e2_5959	-0.464500949	-0.562512498	0.287622942	-0.098011548	0.239016158	0.439641752	FALSE
1322	PF3D7_0935800.e9_9148	0.658464172	0.699641596	0.066664186	0.041177424	0.780720444	0.842222201	FALSE
1323	PF3D7_0935900.e1s1_8599	-0.149409155	-0.283903008	0.299716177	-0.134493853	0.220641625	0.43001912	FALSE
1324	PF3D7_0935900.e2s1_9232	0.318595467	0.226137982	0.126956809	-0.092457484	0.597123964	0.698221683	FALSE
1325	PF3D7_0936200.2o2_4952	-0.397785901	-0.412158653	0.021736395	-0.014372753	0.927601509	0.950308597	FALSE
1326	PF3D7_0936300.2o2_8152	1.362314117	1.189661293	0.550087039	-0.172652825	0.032136954	0.425460158	FALSE
1327	PF3D7_0936400.2o2_8989	-0.45816065	-0.477893678	0.049829752	-0.019733029	0.835081214	0.883610462	FALSE
1328	PF3D7_0936500.iso1.exon1.amp1_973	-0.671445633	-0.785785233	0.413094168	-0.114339599	0.097683427	0.425460158	FALSE
1329	PF3D7_0936600.2o2_6426	-0.383756228	-0.485494095	0.426670287	-0.101737867	0.087975903	0.425460158	FALSE
1330	PF3D7_0936700.1o1_7018	-0.240512049	-0.416219378	0.421483242	-0.175707329	0.091580267	0.425460158	FALSE
1331	PF3D7_0936800.e2s1_5455	0.033793672	-0.091666513	0.364006822	-0.125460186	0.140914272	0.425460158	FALSE
1332	PF3D7_0937000.2o2_6410	-0.702488265	-0.626120777	0.260929309	0.076367488	0.283700253	0.465202053	FALSE
1333	PF3D7_0937200.1o1_7291	-0.097320017	-0.258108877	0.43928382	-0.16078886	0.079726848	0.425460158	FALSE
1334	PF3D7_0937300.iso1.exon2.amp1_3309	-0.179396302	-0.23837259	0.066899629	-0.058976288	0.779967669	0.841812681	FALSE
1335	PF3D7_0937400.iso1.exon2.amp1_1296	0.519990399	0.344432137	0.3653313	-0.175558262	0.139564276	0.425460158	FALSE
1336	PF3D7_0937500.iso1.exon1.amp1_4176	0.012174338	-0.204906024	0.24710768	-0.217080362	0.309136547	0.479995896	FALSE
1337	PF3D7_0937600.iso1.exon1.amp1_2479	-0.426610764	-0.483054829	0.304096027	-0.056444065	0.214265634	0.43001912	FALSE
1338	PF3D7_0937600.iso1.exon2.amp1_3322	1.052499294	1.068348656	0.028897929	0.015849362	0.903858805	0.936247896	FALSE
1339	PF3D7_0937700.iso1.exon2.amp1_713	1.000775849	0.711711402	0.32619034	-0.289064447	0.184288204	0.425460158	FALSE
1340	PF3D7_0937800.iso1.exon1.amp1_2169	-0.476596031	-0.577587612	0.484963234	-0.10099158	0.055309984	0.425460158	FALSE
1341	PF3D7_0937800.iso1.exon2.amp1_1654	-0.046803768	-0.212467363	0.439476122	-0.165663594	0.079606564	0.425460158	FALSE
1342	PF3D7_1000100.iso1.exon2.amp1_3908	1.38051438	1.191211354	0.452440389	-0.189303027	0.07185969	0.425460158	FALSE
1343	PF3D7_1000200.iso1.exon1.amp1_1575	2.032373092	1.994424366	0.043750278	-0.037948725	0.85494203	0.8983996	FALSE
1344	PF3D7_1000300.iso1.exon1.amp1_3601	-0.036857066	-0.141064093	0.467680759	-0.104207028	0.063618471	0.425460158	FALSE
1345	PF3D7_1000400.iso1.exon1.amp1_1864	0.214946981	-0.080039627	0.342233209	-0.294986609	0.164715497	0.425460158	FALSE
1346	PF3D7_1000500.iso1.exon3.amp1_4465	0.499431933	0.265625364	0.54085482	-0.23380657	0.034755928	0.425460158	FALSE
1347	PF3D7_1001300.2o2_6130	-0.289936737	-0.359857079	0.145488598	-0.069920342	0.545245625	0.651136598	FALSE
1348	PF3D7_1001500.1o1_6967	0.801622926	0.745274764	0.144725819	-0.056348162	0.547332069	0.652794181	FALSE
1349	PF3D7_1001600.2o2_4757	-0.267722333	-0.195047137	0.125499201	0.072675196	0.60130652	0.701649389	FALSE
1350	PF3D7_1001700.2o2_9009	-1.114861822	-1.098460399	0.037855964	0.016401423	0.87429425	0.912703304	FALSE
1351	PF3D7_1001900.2o2_7282	0.030019893	-0.067620257	0.252078103	-0.097640149	0.299805802	0.473875687	FALSE
1352	PF3D7_1002100.2o2_7048	2.3529631	2.287417787	0.207760479	-0.065545313	0.390365341	0.530683521	FALSE
1353	PF3D7_1002500.1o3_8986	0.253695024	0.051590405	0.457792186	-0.202104619	0.068862801	0.425460158	FALSE
1354	PF3D7_1002800.e1s2_6354	-0.52521599	-0.608146014	0.279457368	-0.082930023	0.252074175	0.449030278	FALSE
1355	PF3D7_1003100.iso1.exon3.amp1_38	-0.650747197	-0.733472518	0.296074622	-0.08272532	0.226054947	0.431388689	FALSE
1356	PF3D7_1003400.iso1.exon1.amp3_seg2_2299	0.126200034	-0.058110037	0.322225296	-0.184310071	0.189404865	0.425460158	FALSE
1357	PF3D7_1003600.e1s1_8919	-0.37044051	-0.506839723	0.474203799	-0.136399213	0.060358581	0.425460158	FALSE
1358	PF3D7_1003800.e1s2_7780	1.049198711	1.049756736	0.001270729	0.000558025	0.99576119	0.996995567	FALSE
1359	PF3D7_1004200.e2s2_6055	-1.227113209	-1.226743362	0.001156888	0.000369846	0.996140929	0.996995567	FALSE
1360	PF3D7_1004300.iso1.exon1.amp2_2505	-0.61239014	-0.651301037	0.055019022	-0.038910896	0.818218277	0.869705856	FALSE
1361	PF3D7_1004800.2o3_6717	0.116873955	-0.053807686	0.376972102	-0.170681641	0.128160037	0.425460158	FALSE
1362	PF3D7_1005000.1o1_7075	-0.217045924	-0.30142875	0.223812138	-0.084382826	0.355643662	0.509047896	FALSE
1363	PF3D7_1005300.2o2_8452	-0.629264765	-0.66980357	0.193092657	-0.040538804	0.423995935	0.556593915	FALSE
1364	PF3D7_1005500.e2s1_9236	-0.140685646	-0.167830395	0.097884124	-0.027144748	0.683126037	0.765887808	FALSE
1365	PF3D7_1005700.iso1.exon2.amp1_3583	-0.306840448	-0.365735327	0.290730678	-0.05889488	0.234185216	0.436467988	FALSE
1366	PF3D7_1006000.iso1.exon2.amp1_1866	0.044391505	-0.047561927	0.258628183	-0.091953432	0.28782474	0.468566766	FALSE
1367	PF3D7_1006500.1o1_7278	0.288614931	0.111854398	0.43080474	-0.176760533	0.085192818	0.425460158	FALSE
1368	PF3D7_1007000.iso1.exon8.amp1_631	-0.264246098	-0.532569602	0.542916518	-0.268323503	0.034154397	0.425460158	FALSE
1369	PF3D7_1007300.iso1.exon1.amp1_3315	-0.243560493	-0.338884382	0.253661857	-0.09532389	0.296876115	0.471905117	FALSE
1370	PF3D7_1007700.e1s1_6640	0.865094974	0.551516356	0.342771136	-0.313578618	0.164089897	0.425460158	FALSE
1371	PF3D7_1007700.e1s2_8091	2.460054418	2.217002816	0.335963649	-0.243051602	0.172152085	0.425460158	FALSE
1372	PF3D7_1007800.iso1.exon1.amp1_1414	-0.690495166	-0.81724443	0.181895096	-0.126749263	0.450877845	0.576498622	FALSE
1373	PF3D7_1008000.s2_8597	0.291270996	0.105538633	0.370859629	-0.185732363	0.134046084	0.425460158	FALSE
1374	PF3D7_1008100.s1_7726	0.770581738	0.588081652	0.416856715	-0.182500086	0.094903578	0.425460158	FALSE
1375	PF3D7_1008100.s3_5986	0.096595827	-0.055740414	0.25420489	-0.15233624	0.295876411	0.471905117	FALSE
1376	PF3D7_1008200.iso1.exon1.amp1_2743	-0.529267944	-0.625208293	0.343081128	-0.095940349	0.16373027	0.425460158	FALSE
1377	PF3D7_1008400.e1s1_5157	-0.757752206	-0.702657696	0.236840824	0.055094511	0.329067658	0.492495221	FALSE
1378	PF3D7_1008600.1o1_6726	-0.464881298	-0.593988471	0.30970192	-0.129107173	0.206317216	0.426342335	FALSE
1379	PF3D7_1008700.e3s1_6589	-0.568684455	-0.612883129	0.14670772	-0.044198674	0.541919894	0.648546044	FALSE
1380	PF3D7_1008800.e1s1_8915	-0.780364599	-0.927005011	0.58174651	-0.146640412	0.024491101	0.425460158	FALSE
1381	PF3D7_1009000.1o1_8727	0.085999924	-0.00604101	0.23039841	-0.092040935	0.342029097	0.498975674	FALSE
1382	PF3D7_1009300.iso1.exon1.amp1_1604	-0.472048013	-0.526453173	0.254690269	-0.05440516	0.294984928	0.471572256	FALSE
1383	PF3D7_1009500.e3_5958	-0.616074908	-0.725837474	0.404561343	-0.109762566	0.104251441	0.425460158	FALSE
1384	PF3D7_1009600.iso1.exon3.amp1_2459	-0.476399108	-0.57397356	0.172591579	-0.097574452	0.473994855	0.59493356	FALSE
1385	PF3D7_1010200.iso1.exon1.amp2_1917	-0.629340866	-0.58822782	0.218521479	0.041113046	0.366846647	0.516643896	FALSE
1386	PF3D7_1010900.iso1.exon2.amp1_108	-0.43937747	-0.580956398	0.445813234	-0.141578928	0.075731684	0.425460158	FALSE
1387	PF3D7_1011300.1o1_5319	-0.520414485	-0.599815422	0.206623687	-0.079400937	0.392907079	0.532484992	FALSE
1388	PF3D7_1011400.1o1_6697	-0.622735809	-0.67342105	0.145276207	-0.050685241	0.545826148	0.65155237	FALSE
1389	PF3D7_1011500.1o1_7558	-0.515018836	-0.592772241	0.289972693	-0.077753404	0.23535649	0.436467988	FALSE
1390	PF3D7_1011700 (renamed)_6433	0.267143558	0.278646814	0.016135488	0.011503256	0.946220546	0.962351255	FALSE
1391	PF3D7_1011800.e1s2_7200	-0.197649371	-0.211290695	0.068523934	-0.013641324	0.774780492	0.839270625	FALSE
1392	PF3D7_1011900.iso1.exon4.amp1_2357	-0.485860213	-0.670176801	0.403531019	-0.184316587	0.105069838	0.425460158	FALSE
1393	PF3D7_1012000.iso1.exon1.amp1_2737	-0.57046131	-0.674604144	0.405367908	-0.104142834	0.103614634	0.425460158	FALSE
1394	PF3D7_1012000.iso1.exon9.amp1_3295	-0.457191947	-0.517549393	0.412252672	-0.060357446	0.098314759	0.425460158	FALSE
1395	PF3D7_1012100.iso1.exon1.amp1_2444	-0.766635695	-0.768629405	0.013587794	-0.00199371	0.954701103	0.96816705	FALSE
1396	PF3D7_1012200.1o2_8148	0.220453061	0.260331113	0.042437746	0.039878052	0.859243574	0.900909526	FALSE
1397	PF3D7_1012400.e3s1_5724	-0.325786413	-0.4363405	0.288843056	-0.110554087	0.237110437	0.438030391	FALSE
1398	PF3D7_1012500.e1s1_9230	-0.578633785	-0.69729332	0.267415086	-0.118659536	0.27231049	0.460421317	FALSE
1399	PF3D7_1012600.e1s1_9222	-0.718287744	-0.844105364	0.272643271	-0.12581762	0.263380251	0.452919237	FALSE
1400	PF3D7_1012700.e1s1_7980	1.444724071	1.311972242	0.392583993	-0.132751829	0.114113384	0.425460158	FALSE
1401	PF3D7_1012700.e1s2_6240	-0.206988844	-0.390242894	0.334463696	-0.18325405	0.173971273	0.425460158	FALSE
1402	PF3D7_1013100.1o2_5076	-0.730322956	-0.729420068	0.006104734	0.000902887	0.979638552	0.987030722	FALSE
1403	PF3D7_1013100.2o2_4787	-0.305154834	-0.367626971	0.23073126	-0.062472137	0.341350825	0.498956805	FALSE
1404	PF3D7_1013200.iso1.exon1.amp1_4310	-0.389063729	-0.470610289	0.256723689	-0.08154656	0.291271525	0.470619313	FALSE
1405	PF3D7_1013200.iso1.exon1.amp2_2506	-0.149755841	-0.264775244	0.296679312	-0.115019403	0.225148959	0.431112685	FALSE
1406	PF3D7_1013400.iso1.exon9.amp1_3307	-0.435625185	-0.528891215	0.220949347	-0.09326603	0.361676139	0.512671731	FALSE
1407	PF3D7_1013700.iso1.exon1.amp1_3828	-0.412865662	-0.463262565	0.182983305	-0.050396903	0.448220005	0.575060574	FALSE
1408	PF3D7_1013900.iso1.exon1.amp2_seg2_4622	0.141280481	-0.215341692	0.870136018	-0.356622174	0.001810265	0.425460158	FALSE
1409	PF3D7_1014000.iso1.exon6.amp1_1249	-0.222365348	-0.318306582	0.397219171	-0.095941233	0.110205575	0.425460158	FALSE
1410	PF3D7_1014000.iso1.exon7.amp1_955	-0.567629437	-0.664630172	0.297817877	-0.097000735	0.22345076	0.430622633	FALSE
1411	PF3D7_1014100.s1_5371	0.299961953	0.364385002	0.096967184	0.064423048	0.68592146	0.768137861	FALSE
1412	PF3D7_1014100.s2_5660	0.854949499	0.654005972	0.383827595	-0.200943527	0.121820476	0.425460158	FALSE
1413	PF3D7_1014300.e1s3_6628	-0.505449525	-0.623030118	0.588166977	-0.117580593	0.023165712	0.425460158	FALSE
1414	PF3D7_1014500.iso1.exon1.amp2_3369	-0.468135236	-0.626176616	0.357531604	-0.15804138	0.14767255	0.425460158	FALSE
1415	PF3D7_1014600 (renamed, has duplicates)_5653	-0.232529313	-0.325839004	0.230765319	-0.093309691	0.341281474	0.498956805	FALSE
1416	PF3D7_1014600.e1s2_7100	-0.197818933	-0.401633529	0.422490853	-0.203814596	0.090870139	0.425460158	FALSE
1417	PF3D7_1014600.e1s3_8257	0.083512254	-0.067672029	0.286145615	-0.151184283	0.24133936	0.441187606	FALSE
1418	PF3D7_1014800.6o11_8787	-0.232587857	-0.40889552	0.409533463	-0.176307663	0.100379174	0.425460158	FALSE
1419	PF3D7_1014800.7o11_8498	-0.317588618	-0.36272528	0.332599688	-0.045136662	0.176253771	0.425460158	FALSE
1420	PF3D7_1014900.iso1.exon1.amp1_3710	-0.561879571	-0.592612986	0.098643023	-0.030733415	0.680815997	0.764520647	FALSE
1421	PF3D7_1015100.1o1_9044	-0.27146813	-0.476858345	0.343172539	-0.205390215	0.163624345	0.425460158	FALSE
1422	PF3D7_1015200.iso1.exon3.amp1_1792	-0.361014443	-0.455685166	0.30064391	-0.094670723	0.219278827	0.43001912	FALSE
1423	PF3D7_1015500.1o1_8772	-0.186511433	-0.311303158	0.265051713	-0.124791725	0.276420752	0.46266608	FALSE
1424	PF3D7_1015900.e2s1_5752	0.240752716	0.102088662	0.373029061	-0.138664054	0.131931417	0.425460158	FALSE
1425	PF3D7_1016000.iso1.exon1.amp1_1018	-0.645199705	-0.660939867	0.112336155	-0.015740162	0.639714086	0.733987668	FALSE
1426	PF3D7_1016200.1o1_8491	0.606120832	0.491618549	0.161894573	-0.114502283	0.501433547	0.615325893	FALSE
1427	PF3D7_1016300.e1s1_5130	-0.38126902	-0.321839118	0.076286841	0.059429901	0.75014492	0.821322279	FALSE
1428	PF3D7_1016500.e1s1_7472	-0.103945018	-0.226392575	0.325245253	-0.122447557	0.185497556	0.425460158	FALSE
1429	PF3D7_1016500.e2s1_8376	-0.562356216	-0.677147665	0.355923241	-0.114791449	0.149392482	0.425460158	FALSE
1430	PF3D7_1016700.iso1.exon2.amp1_3820	-0.626700571	-0.690831616	0.230139958	-0.064131045	0.342556409	0.498975674	FALSE
1431	PF3D7_1016900.e1s1_4855	-0.042202919	-0.129979288	0.257716288	-0.087776368	0.289471345	0.469720863	FALSE
1432	PF3D7_1017000.e1s1_7482	-0.370348491	-0.47713636	0.364216987	-0.106787869	0.14069933	0.425460158	FALSE
1433	PF3D7_1017000.e1s2_7193	-0.104460303	-0.199306915	0.36253408	-0.094846612	0.142428215	0.425460158	FALSE
1434	PF3D7_1017100.1o1_6988	0.5949184	0.545724581	0.147046682	-0.049193819	0.540997178	0.648271832	FALSE
1435	PF3D7_1017300.1.2o2_6764	-0.029533	-0.22880601	0.393845094	-0.199273009	0.113038574	0.425460158	FALSE
1436	PF3D7_1017800.iso1.exon3.amp1_1681	-0.146746601	-0.193590222	0.178218553	-0.046843621	0.459929095	0.584871284	FALSE
1437	PF3D7_1017800.iso1.exon3.amp2_1970	-0.412246704	-0.438921834	0.089606198	-0.02667513	0.708529535	0.788569511	FALSE
1438	PF3D7_1017900.e2s1_5746	-0.396205308	-0.563067086	0.631056417	-0.166861778	0.015909167	0.425460158	FALSE
1439	PF3D7_1018000.1o1_8202	-0.55481614	-0.682932237	0.44326988	-0.128116097	0.077266253	0.425460158	FALSE
1440	PF3D7_1018100.1o1_6997	-0.396223422	-0.488375274	0.406652383	-0.092151852	0.102607456	0.425460158	FALSE
1441	PF3D7_1018300.e1s1_5945	-0.093981319	-0.26158959	0.321344737	-0.167608271	0.190556527	0.425460158	FALSE
1442	PF3D7_1018300.e2s2_5481	-0.451486681	-0.587483477	0.283275719	-0.135996796	0.245901936	0.444339335	FALSE
1443	PF3D7_1019000.e1s1_6639	0.028476624	-0.124054977	0.424311812	-0.152531601	0.089599026	0.425460158	FALSE
1444	PF3D7_1019000.e1s2_6350	-0.570083469	-0.693188615	0.314868438	-0.123105145	0.199200124	0.426342335	FALSE
1445	PF3D7_1019300.iso1.exon1.amp2_1043	0.100230276	-0.09927568	0.329635633	-0.199505957	0.179933329	0.425460158	FALSE
1446	PF3D7_1019400.e2s1_9178	-0.419800455	-0.52169073	0.298483506	-0.101890275	0.222462592	0.430493518	FALSE
1447	PF3D7_1019500.1.6o25_6176	-0.053436011	-0.083488748	0.09907427	-0.030052738	0.679504762	0.763659861	FALSE
1448	PF3D7_1019500.1.9o25_6465	-0.729104185	-0.779941233	0.130589129	-0.050837048	0.586764381	0.687829149	FALSE
1449	PF3D7_1020200.e2s1_4857	-0.086929291	-0.195345677	0.339130614	-0.108416386	0.168362044	0.425460158	FALSE
1450	PF3D7_1020200.e3s1_5754	-0.541470612	-0.584459006	0.521481656	-0.042988395	0.040908606	0.425460158	FALSE
1451	PF3D7_1020300.e1s1_7784	-0.158158876	-0.254016777	0.392845727	-0.095857901	0.113889595	0.425460158	FALSE
1452	PF3D7_1020500.1o1_4727	-0.307853995	-0.283673388	0.113125998	0.024180607	0.63737799	0.731862361	FALSE
1453	PF3D7_1020700.e1s1_7201	-0.595922042	-0.61169613	0.039182433	-0.015774088	0.869931564	0.909503395	FALSE
1454	PF3D7_1020700.e1s2_8363	-0.535171041	-0.702643439	0.421772583	-0.167472398	0.091375854	0.425460158	FALSE
1455	PF3D7_1020800.11o11_6470	-0.569762077	-0.705712746	0.358298449	-0.13595067	0.146858334	0.425460158	FALSE
1456	PF3D7_1021000.iso1.exon2.amp1_3284	-0.617617854	-0.750540475	0.395783597	-0.132922621	0.111403383	0.425460158	FALSE
1457	PF3D7_1021000.iso1.exon4.amp1_1510	-0.37768087	-0.526266673	0.349715398	-0.148585804	0.156187787	0.425460158	FALSE
1458	PF3D7_1021200.1o1_6485	0.703424597	0.47751953	0.42370225	-0.225905067	0.090022781	0.425460158	FALSE
1459	PF3D7_1021500.iso1.exon1.amp1_154	-0.178671877	-0.448389037	0.358691406	-0.26971716	0.146442555	0.425460158	FALSE
1460	PF3D7_1021600.e1s1_6028	0.019991195	0.034408791	0.049971928	0.014417595	0.83461806	0.883453771	FALSE
1461	PF3D7_1021700.e1s2_6931	0.129273004	0.000874199	0.312387936	-0.128398805	0.202592365	0.426342335	FALSE
1462	PF3D7_1021700.e1s3_8087	-0.92213091	-0.965163755	0.124628979	-0.043032845	0.603810447	0.70369264	FALSE
1463	PF3D7_1021700.e2s2_7510	-0.219973043	-0.186544005	0.151040635	0.033429038	0.530189718	0.63969534	FALSE
1464	PF3D7_1021700.e3s1_8324	0.466020464	0.32463939	0.389964182	-0.141381074	0.116374235	0.425460158	FALSE
1465	PF3D7_1021800.iso1.exon2.amp1_3703	0.626222368	0.435763613	0.571124962	-0.190458754	0.02684193	0.425460158	FALSE
1466	PF3D7_1021900.e1s2_5472	0.559636028	0.562776406	0.006119401	0.003140378	0.979589646	0.987030722	FALSE
1467	PF3D7_1021900.e1s3_6056	-0.016967997	-0.068649089	0.124080639	-0.051681092	0.60539083	0.705241332	FALSE
1468	PF3D7_1022000.e2_4806	0.942117034	0.770384669	0.373737966	-0.171732365	0.131246541	0.425460158	FALSE
1469	PF3D7_1022200.e2s1_5154	-0.484715453	-0.576911676	0.351730831	-0.092196223	0.153954117	0.425460158	FALSE
1470	PF3D7_1022300.2o6_4974	0.371880684	0.150055607	0.38673843	-0.221825077	0.119210575	0.425460158	FALSE
1471	PF3D7_1022700.1o1_7854	-0.413248324	-0.518731271	0.278693887	-0.105482947	0.253322329	0.449851685	FALSE
1472	PF3D7_1023100.e1s3_6525	-0.923563974	-0.990709904	0.358043464	-0.06714593	0.147128654	0.425460158	FALSE
1473	PF3D7_1023100.e1s4_6236	-0.606071544	-0.71914007	0.363353392	-0.113068527	0.141584311	0.425460158	FALSE
1474	PF3D7_1023100.e1s6_5941	0.603132295	0.490065542	0.149636787	-0.113066753	0.533974804	0.643431608	FALSE
1475	PF3D7_1023200.1o1_6706	-0.018489687	-0.019447017	0.003232061	-0.00095733	0.989219016	0.993826629	FALSE
1476	PF3D7_1023900.s3_8307	0.031194775	-0.019976563	0.126153271	-0.051171338	0.599427906	0.70003992	FALSE
1477	PF3D7_1024000.iso1.exon1.amp1_1314	-0.260766218	-0.382886225	0.339408921	-0.122120006	0.168032269	0.425460158	FALSE
1478	PF3D7_1024300.1o1_7540	-0.459132782	-0.535518764	0.275304537	-0.076385981	0.258919975	0.450960176	FALSE
1479	PF3D7_1024400.1o2_7617	-0.583236758	-0.65586304	0.229545705	-0.072626282	0.343770999	0.500225158	FALSE
1480	PF3D7_1024800.e2s2_5767	0.242582459	0.175859989	0.162475607	-0.06672247	0.499919908	0.614005879	FALSE
1481	PF3D7_1026500.iso1.exon1.amp1_1214	-0.511955909	-0.559448007	0.179551218	-0.047492098	0.456635465	0.582267323	FALSE
1482	PF3D7_1026900.1o1_7582	-0.800268765	-0.908023697	0.302878726	-0.107754932	0.216023035	0.43001912	FALSE
1483	PF3D7_1027000.iso1.exon1.amp2_seg1_3452	-0.384257835	-0.519054236	0.221478857	-0.134796402	0.360555112	0.511637923	FALSE
1484	PF3D7_1027400.iso1.exon1.amp1_87	-0.309890255	-0.413278406	0.376496401	-0.103388151	0.128610131	0.425460158	FALSE
1485	PF3D7_1028000.iso1.exon2.amp1_1224	-0.425645742	-0.48198608	0.338043254	-0.056340338	0.169655571	0.425460158	FALSE
1486	PF3D7_1028300.e1s1_5740	-0.404233356	-0.549338978	0.46762238	-0.145105622	0.063648348	0.425460158	FALSE
1487	PF3D7_1028700.1o1_8478	0.428044871	0.337660867	0.44765339	-0.090384004	0.074638351	0.425460158	FALSE
1488	PF3D7_1028900.2o2_7542	-0.619656574	-0.69811021	0.534622976	-0.078453637	0.036634562	0.425460158	FALSE
1489	PF3D7_1029400.1o1_7611	-0.63064133	-0.736302144	0.278590225	-0.105660813	0.253492159	0.449868363	FALSE
1490	PF3D7_1029500.1o1_4650	-0.204674236	-0.328525858	0.299351931	-0.123851622	0.221178492	0.43001912	FALSE
1491	PF3D7_1030200.1o1_4717	0.26716564	0.426566224	0.253720928	0.159400583	0.296767248	0.471905117	FALSE
1492	PF3D7_1030400.2o2_6704	-0.092347234	-0.112979158	0.031943058	-0.020631924	0.893790232	0.929250207	FALSE
1493	PF3D7_1030500.1o1_4988	-0.52913011	-0.718206941	0.459396858	-0.189076831	0.067986272	0.425460158	FALSE
1494	PF3D7_1030700.iso1.exon1.amp1_391	-0.172215001	-0.417548646	0.554193978	-0.245333645	0.031032101	0.425460158	FALSE
1495	PF3D7_1030800.1o1_5237	0.335094111	0.116088042	0.420915147	-0.21900607	0.091982778	0.425460158	FALSE
1496	PF3D7_1031500.iso1.exon1.amp1_1891	-0.54855974	-0.614462716	0.171301206	-0.065902977	0.477256414	0.597956651	FALSE
1497	PF3D7_1031500.iso1.exon4.amp1_656	-0.434363992	-0.524111542	0.233888639	-0.08974755	0.334963507	0.495639933	FALSE
1498	PF3D7_1031800.iso1.exon1.amp1_698	-0.140625544	-0.310138356	0.51388839	-0.169512812	0.04358354	0.425460158	FALSE
1499	PF3D7_1032100.iso1.exon1.amp1_3724	-0.125908065	-0.238737189	0.320295337	-0.112829125	0.191936344	0.425460158	FALSE
1500	PF3D7_1032100.iso1.exon1.amp2_4232	0.194434462	0.058601942	0.327846489	-0.13583252	0.182184312	0.425460158	FALSE
1501	PF3D7_1032400.3o7_4720	-0.192714957	-0.30246723	0.413605284	-0.109752272	0.097301688	0.425460158	FALSE
1502	PF3D7_1032900.e1s1_8259	-0.272551485	-0.494903945	0.334476809	-0.22235246	0.173955301	0.425460158	FALSE
1503	PF3D7_1033700.e3s1_8911	-0.429200502	-0.558788981	0.440824902	-0.129588479	0.078767422	0.425460158	FALSE
1504	PF3D7_1033800.8o8_9037	-0.081995199	-0.247551572	0.303327932	-0.165556373	0.21537321	0.43001912	FALSE
1505	PF3D7_1034100.iso1.exon2.amp1_2074	-0.269237173	-0.421401587	0.365907382	-0.152164414	0.138980489	0.425460158	FALSE
1506	PF3D7_1034500.iso1.exon2.amp2_seg1_573	-0.365104976	-0.466069886	0.296488059	-0.10096491	0.225435202	0.431112685	FALSE
1507	PF3D7_1034700.1o1_4662	-0.428760679	-0.521991513	0.391319484	-0.093230834	0.115199889	0.425460158	FALSE
1508	PF3D7_1034900.e1s1_8260	-0.41398777	-0.575024347	0.380630989	-0.161036577	0.124742526	0.425460158	FALSE
1509	PF3D7_1035000.1o1_8245	-0.60087865	-0.647150227	0.264819897	-0.046271576	0.276826387	0.46266608	FALSE
1510	PF3D7_1035100.1o1_8208	0.378639373	0.17043565	0.448596729	-0.208203723	0.074083328	0.425460158	FALSE
1511	PF3D7_1035200.1o1_4741	-0.567138245	-0.656681394	0.236294736	-0.089543149	0.330152698	0.493206268	FALSE
1512	PF3D7_1035300.iso1.exon1.amp1_2847	-0.212971048	-0.316103076	0.350491675	-0.103132028	0.155324298	0.425460158	FALSE
1513	PF3D7_1035300.iso1.exon1.amp2_3364	-0.690291588	-0.762951848	0.656630382	-0.07266026	0.01267722	0.425460158	FALSE
1514	PF3D7_1035600.1o1_6162	-0.123686008	-0.217160283	0.374424167	-0.093474276	0.130586464	0.425460158	FALSE
1515	PF3D7_1035700.e1s1_8948	0.120516359	0.055194018	0.184250227	-0.065322341	0.445137927	0.573606042	FALSE
1516	PF3D7_1035800.1o1_5041	0.694226047	0.4942398	0.422189315	-0.199986247	0.091082145	0.425460158	FALSE
1517	PF3D7_1035900.1o1_5890	1.419084183	1.611080816	0.288441915	0.191996633	0.237735693	0.438559791	FALSE
1518	PF3D7_1036000.1o1_5293	0.288315847	0.219561507	0.102036381	-0.06875434	0.670527	0.756298354	FALSE
1519	PF3D7_1036300.1o1_6786	-0.672565416	-0.720213647	0.143187619	-0.047648231	0.551552601	0.655041716	FALSE
1520	PF3D7_1036400.1o2_6117	0.707609063	0.807324884	0.189571571	0.099715821	0.4323371	0.563848013	FALSE
1521	PF3D7_1036400.e2s2_6540	-0.285021036	-0.190725181	0.167856019	0.094295855	0.486029814	0.604690894	FALSE
1522	PF3D7_1036500.1o1_6762	0.501124642	0.248157506	0.372202432	-0.252967136	0.132733835	0.425460158	FALSE
1523	PF3D7_1036600.iso1.exon3.amp1_3273	-0.795880708	-1.014486674	0.436067723	-0.218605967	0.081762467	0.425460158	FALSE
1524	PF3D7_1036600.iso2.exon3.amp1_3851	-0.075924318	-0.278376942	0.463837409	-0.202452625	0.06561257	0.425460158	FALSE
1525	PF3D7_1036900.e1s2_5948	0.393784746	0.168885237	0.569106054	-0.224899509	0.027312128	0.425460158	FALSE
1526	PF3D7_1036900.e2s1_6576	-0.521478977	-0.635001242	0.32697881	-0.113522265	0.183284136	0.425460158	FALSE
1527	PF3D7_1037000.iso1.exon3.amp1_4275	0.430594189	0.363145937	0.167667324	-0.067448252	0.486513073	0.604690894	FALSE
1528	PF3D7_1037000.iso1.exon3.amp2_4564	-0.169160063	-0.205551554	0.092532243	-0.036391492	0.699507632	0.780509112	FALSE
1529	PF3D7_1037100.1o1_9098	-0.358239635	-0.425146895	0.186420526	-0.06690726	0.439888887	0.568933449	FALSE
1530	PF3D7_1037200.10o12_7895	-0.250033782	-0.385478623	0.435231298	-0.135444841	0.082299352	0.425460158	FALSE
1531	PF3D7_1037600.e2s1_7184	0.250136337	0.132910851	0.321562071	-0.117225486	0.19027176	0.425460158	FALSE
1532	PF3D7_1037600.e3s1_6616	-0.45066433	-0.58525857	0.333567323	-0.13459424	0.175065872	0.425460158	FALSE
1533	PF3D7_1038400.e1s1_8544	-0.237694741	-0.380420578	0.411450845	-0.142725837	0.09891963	0.425460158	FALSE
1534	PF3D7_1038400.e3s1_7460	-0.306841751	-0.426163812	0.364438672	-0.119322061	0.140472905	0.425460158	FALSE
1535	PF3D7_1038400.e7s1_7389	0.035902031	-0.073641576	0.262846127	-0.109543608	0.280298029	0.463690662	FALSE
1536	PF3D7_1038500.2o2_4992	-0.121327982	-0.069484993	0.124877204	0.05184299	0.603095697	0.703151906	FALSE
1537	PF3D7_1038600.2o2_8191	-0.417643056	-0.54578446	0.359653705	-0.128141403	0.145428509	0.425460158	FALSE
1538	PF3D7_1038900.e1s1_9213	-0.854828212	-0.955213463	0.367340841	-0.100385251	0.137536746	0.425460158	FALSE
1539	PF3D7_1039700.iso1.exon1.amp1_1851	0.292156327	0.047943667	0.320669564	-0.24421266	0.191443371	0.425460158	FALSE
1540	PF3D7_1039900.iso1.exon2.amp1_3588	-0.301582402	-0.371070581	0.267265235	-0.069488179	0.272569744	0.460421317	FALSE
1541	PF3D7_1040000.iso1.exon2.amp1_1585	0.187012491	-0.0836083	0.411814474	-0.270620791	0.098644921	0.425460158	FALSE
1542	PF3D7_1040100.iso1.exon2.amp1_3299	1.050500383	0.998128971	0.13315518	-0.052371412	0.579500966	0.680737624	FALSE
1543	PF3D7_1040200.iso1.exon2.amp1_408	0.772818456	0.438310476	0.417140703	-0.33450798	0.094696591	0.425460158	FALSE
1544	PF3D7_1040300.iso1.exon2.amp1_997	0.794396794	0.414005811	0.474052158	-0.380390983	0.06043262	0.425460158	FALSE
1545	PF3D7_1040400.iso1.exon2.amp1_2156	0.019278738	-0.224808626	0.580618854	-0.244087364	0.024731152	0.425460158	FALSE
1546	PF3D7_1040500.iso1.exon2.amp1_2735	-0.128936735	-0.402337021	0.469239454	-0.273400286	0.062825412	0.425460158	FALSE
1547	PF3D7_1040600.iso1.exon2.amp1_2150	-0.041558645	-0.193500862	0.403621427	-0.151942217	0.104997805	0.425460158	FALSE
1548	PF3D7_1040700.iso1.exon2.amp1_419	0.04693505	-0.193349007	0.398494952	-0.240284056	0.109150414	0.425460158	FALSE
1549	PF3D7_1040900.iso1.exon2.amp1_2143	0.384748517	0.275984329	0.170520811	-0.108764188	0.479235431	0.599900066	FALSE
1550	PF3D7_1041000.iso1.exon2.amp1_1280	0.279091887	0.124351898	0.241055926	-0.154739989	0.320777318	0.486984082	FALSE
1551	PF3D7_1041100.iso1.exon2.amp1_3013	0.198601216	0.030481573	0.329531568	-0.168119643	0.180063637	0.425460158	FALSE
1552	PF3D7_1041200.iso1.exon2.amp1_2153	0.515445778	0.22464148	0.387603248	-0.290804298	0.118444421	0.425460158	FALSE
1553	PF3D7_1041300.iso1.exon1.amp1_1293	0.866756847	0.578329528	0.533791739	-0.288427319	0.03689215	0.425460158	FALSE
1554	PF3D7_1041300.iso1.exon2.amp1_498	-0.26512816	-0.369275514	0.516401029	-0.104147354	0.042681066	0.425460158	FALSE
1555	PF3D7_1041300.iso1.exon2.amp2_787	-0.702287625	-0.862203874	0.35583817	-0.159916249	0.149483916	0.425460158	FALSE
1556	PF3D7_1100100.iso1.exon1.amp1_4545	-0.615275231	-0.732506548	0.425015083	-0.117231318	0.0891123	0.425460158	FALSE
1557	PF3D7_1100100.iso1.exon2.amp1_1582	0.99719561	0.735849741	0.460756379	-0.261345868	0.067251489	0.425460158	FALSE
1558	PF3D7_1100200.e1s1_7391	-0.643206316	-0.690903572	0.20059128	-0.047697256	0.406577193	0.541140688	FALSE
1559	PF3D7_1100200.e1s2_8548	-0.716354911	-0.772293751	0.27458152	-0.05593884	0.260126072	0.451636845	FALSE
1560	PF3D7_1100200.e1s3_7392	-0.752709458	-0.79019534	0.138988816	-0.037485882	0.56316146	0.665727123	FALSE
1561	PF3D7_1100300.iso1.exon2.amp1_4474	1.335610388	1.1099346	0.543015117	-0.225675788	0.034125873	0.425460158	FALSE
1562	PF3D7_1100400.iso1.exon2.amp1_3590	0.282091823	-0.074117437	0.460220108	-0.35620926	0.067540474	0.425460158	FALSE
1563	PF3D7_1100500.iso1.exon1.amp1_699	-0.065812695	-0.025020595	0.046443246	0.040792099	0.846131248	0.891535379	FALSE
1564	PF3D7_1100800.2o2_4959	-0.472332939	-0.540837627	0.209269345	-0.068504688	0.387008552	0.528497805	FALSE
1565	PF3D7_1101100.iso1.exon1.amp1_3897	0.256953968	-0.012105973	0.51486993	-0.269059941	0.043228927	0.425460158	FALSE
1566	PF3D7_1101200.iso1.exon1.amp1_3319	0.689313841	0.491925979	0.290205381	-0.197387862	0.234996451	0.436467988	FALSE
1567	PF3D7_1101300.iso1.exon1.amp1_2434	0.103772833	-0.069884992	0.40523778	-0.173657824	0.103717146	0.425460158	FALSE
1568	PF3D7_1101500.iso1.exon1.amp1_3877	-0.413517685	-0.471269694	0.228918574	-0.057752009	0.345056032	0.501054953	FALSE
1569	PF3D7_1101700.iso1.exon2.amp1_2140	0.471379422	0.163524352	0.436829606	-0.30785507	0.081276125	0.425460158	FALSE
1570	PF3D7_1102200.iso1.exon1.amp1_2170	-0.035306037	-0.280686765	0.314520565	-0.245380728	0.199673118	0.426342335	FALSE
1571	PF3D7_1102400.1o1_6766	-0.199713526	-0.288354091	0.314330629	-0.088640565	0.199931746	0.426342335	FALSE
1572	PF3D7_1102500.e2s1_5459	1.037291567	1.082908955	0.111416128	0.045617388	0.64244014	0.735278352	FALSE
1573	PF3D7_1102700.iso1.exon1.amp1_375	-0.423833475	-0.549281841	0.431691953	-0.125448365	0.084605799	0.425460158	FALSE
1574	PF3D7_1102800.iso1.exon1.amp1_671	1.344194937	1.252348189	0.226223087	-0.091846748	0.350617258	0.506310629	FALSE
1575	PF3D7_1103000.iso1.exon1.amp1_1212	-0.49550298	-0.591019005	0.383697281	-0.095516025	0.121938447	0.425460158	FALSE
1576	PF3D7_1103100.e2s1_8572	-0.125432121	-0.354998452	0.506068005	-0.229566331	0.04650588	0.425460158	FALSE
1577	PF3D7_1103500.13o13_6965	-0.262646616	-0.357584019	0.417639866	-0.094937403	0.094333727	0.425460158	FALSE
1578	PF3D7_1103500.1o13_8994	0.013025761	-0.09401163	0.34377511	-0.107037391	0.162927514	0.425460158	FALSE
1579	PF3D7_1103500.1o2_7831	0.763465987	0.613595127	0.483908282	-0.149870861	0.055787497	0.425460158	FALSE
1580	PF3D7_1103800.e1s1_7393	1.69560471	1.268648919	0.4666215	-0.426955791	0.064162548	0.425460158	FALSE
1581	PF3D7_1104000.1o3_6466	-0.528372083	-0.63209934	0.334431979	-0.103727257	0.174009909	0.425460158	FALSE
1582	PF3D7_1104100.4o4_7289	-0.064702875	-0.271876126	0.4411781	-0.207173251	0.07854898	0.425460158	FALSE
1583	PF3D7_1104200.e1s2_5379	-0.288069406	-0.390936035	0.274178815	-0.102866629	0.260799676	0.452526171	FALSE
1584	PF3D7_1104800.2o9_8185	-0.614728194	-0.721723784	0.330228121	-0.10699559	0.179192882	0.425460158	FALSE
1585	PF3D7_1105200.iso1.exon3.amp1_951	-0.410859508	-0.516319545	0.33112461	-0.105460037	0.178077214	0.425460158	FALSE
1586	PF3D7_1105600.e1s1_6922	-0.394274029	-0.494295345	0.232855721	-0.100021317	0.337043786	0.496357978	FALSE
1587	PF3D7_1105900.iso1.exon1.amp1_1541	-0.652833183	-0.743047339	0.332329929	-0.090214155	0.1765861	0.425460158	FALSE
1588	PF3D7_1106100.iso1.exon4.amp1_381	-0.431300052	-0.457874788	0.233124561	-0.026574735	0.336501476	0.495994122	FALSE
1589	PF3D7_1106300.2o6_8231	0.234032278	0.053941879	0.395237788	-0.180090398	0.111861722	0.425460158	FALSE
1590	PF3D7_1106700.iso1.exon1.amp2_772	-0.581264197	-0.587333306	0.032658261	-0.00606911	0.891428087	0.927482135	FALSE
1591	PF3D7_1107400.iso1.exon1.amp1_3598	0.385910145	0.240326881	0.410827485	-0.145583265	0.099392106	0.425460158	FALSE
1592	PF3D7_1107500.iso1.exon5.amp1_2058	-0.302130711	-0.391405679	0.306233969	-0.089274969	0.211206342	0.429458001	FALSE
1593	PF3D7_1107600.iso1.exon1.amp1_seg2_2908	-0.438091972	-0.618384753	0.348600347	-0.180292781	0.157435048	0.425460158	FALSE
1594	PF3D7_1107600.iso1.exon1.amp2_3661	-0.411830133	-0.450082366	0.111458935	-0.038252233	0.642313183	0.735278352	FALSE
1595	PF3D7_1107800.e2s1_7678	-0.271386101	-0.476774743	0.396248529	-0.205388642	0.111014235	0.425460158	FALSE
1596	PF3D7_1107900.iso1.exon1.amp1_542	-0.422544891	-0.504307722	0.242577052	-0.081762831	0.317822363	0.485967132	FALSE
1597	PF3D7_1108100.iso1.exon1.amp1_2831	-0.657639278	-0.809937357	0.247097588	-0.15229808	0.309155702	0.479995896	FALSE
1598	PF3D7_1108600.e1s1_6906	-0.161968965	-0.255770703	0.322732621	-0.093801738	0.188743888	0.425460158	FALSE
1599	PF3D7_1109200.3o4_6218	0.43591314	0.422887513	0.019243475	-0.013025626	0.935884026	0.955301431	FALSE
1600	PF3D7_1110200.e1s1_4895	0.172001532	0.227701412	0.084431373	0.05569988	0.724594057	0.79952652	FALSE
1601	PF3D7_1110200.e1s2_6629	-0.140001412	-0.273688938	0.363076248	-0.133687527	0.141869303	0.425460158	FALSE
1602	PF3D7_1110200.e2s1_6580	-0.430052087	-0.473827846	0.460230332	-0.043775759	0.067534954	0.425460158	FALSE
1603	PF3D7_1110400.e3s2_7791	-0.621801609	-0.704514713	0.345787336	-0.082713105	0.160618168	0.425460158	FALSE
1604	PF3D7_1110700.e2s1_5162	-0.389005721	-0.417949702	0.057426335	-0.028943981	0.81042601	0.864372207	FALSE
1605	PF3D7_1111000.1o1_6758	-0.217757569	-0.34869668	0.319831966	-0.130939111	0.192548157	0.425460158	FALSE
1606	PF3D7_1111300.1o1_8154	0.353659396	0.11525388	0.644618104	-0.238405516	0.01410778	0.425460158	FALSE
1607	PF3D7_1111400.iso1.exon1.amp1_2422	-0.362094871	-0.374739095	0.059142949	-0.012644224	0.804881908	0.861118617	FALSE
1608	PF3D7_1111600.iso1.exon1.amp1_437	-0.212341503	-0.345272131	0.433974743	-0.132930628	0.083111764	0.425460158	FALSE
1609	PF3D7_1111800.iso1.exon1.amp1_2132	-1.523189448	-1.601194466	0.253231896	-0.078005018	0.297669402	0.472362763	FALSE
1610	PF3D7_1111800.iso1.exon2.amp1_2710	0.30646521	0.238904092	0.183891793	-0.067561118	0.446008563	0.574022064	FALSE
1611	PF3D7_1111900.iso1.exon1.amp1_693	0.138549724	0.040194129	0.258855159	-0.098355595	0.287415963	0.468554861	FALSE
1612	PF3D7_1112100.iso1.exon1.amp1_1397	-0.515210169	-0.483101465	0.094997129	0.032108704	0.691943289	0.773608047	FALSE
1613	PF3D7_1112100.iso1.exon1.amp2_1686	-0.390556632	-0.440062304	0.206392259	-0.049505672	0.393425862	0.532615983	FALSE
1614	PF3D7_1112100.iso1.exon1.amp3_2210	-0.54603217	-0.534893616	0.084041052	0.011138554	0.725811248	0.79999007	FALSE
1615	PF3D7_1112400.1o1_4663	-0.192772176	-0.304756469	0.311417978	-0.111984292	0.203931256	0.426342335	FALSE
1616	PF3D7_1113000.iso1.exon2.amp1_1889	-0.522263237	-0.638052972	0.350793166	-0.115789735	0.154990003	0.425460158	FALSE
1617	PF3D7_1113000.iso1.exon3.amp1_1542	-0.39196716	-0.507834176	0.379246126	-0.115867016	0.126026818	0.425460158	FALSE
1618	PF3D7_1113000.iso1.exon5.amp1_118	-0.575996446	-0.644746402	0.241554452	-0.068749957	0.319806728	0.486587855	FALSE
1619	PF3D7_1113000.iso1.exon7.amp3_1351	0.176459912	0.121011864	0.114263149	-0.055448047	0.634021566	0.729202818	FALSE
1620	PF3D7_1113700.e1s1_8346	0.34689632	0.143803485	0.505431207	-0.203092835	0.046751584	0.425460158	FALSE
1621	PF3D7_1114500.iso1.exon1.amp1_3323	-0.719405186	-0.709476453	0.071178285	0.009928733	0.766327535	0.833823185	FALSE
1622	PF3D7_1114700.e1_8271	-0.339841724	-0.539301599	0.431269195	-0.199459875	0.084885068	0.425460158	FALSE
1623	PF3D7_1114900.e1s1_7681	-0.447251942	-0.566581146	0.433345746	-0.119329204	0.083521087	0.425460158	FALSE
1624	PF3D7_1114900.e1s2_9122	-0.603468676	-0.738280995	0.267943977	-0.134812319	0.271396941	0.460421317	FALSE
1625	PF3D7_1115200.2o7_7060	-0.52303625	-0.585331718	0.241581319	-0.062295467	0.319754479	0.486587855	FALSE
1626	PF3D7_1115300.e1s1_7187	-0.074168567	-0.231490611	0.32717282	-0.157322044	0.183037756	0.425460158	FALSE
1627	PF3D7_1115400.e1s1_6025	0.250057466	0.179673081	0.163971027	-0.070384385	0.496036406	0.611246423	FALSE
1628	PF3D7_1115600.e3s1_6879	-0.016031056	-0.110923648	0.143423778	-0.094892592	0.550903493	0.654548049	FALSE
1629	PF3D7_1115700.e1s1_7476	-0.523755039	-0.647816419	0.312498972	-0.12406138	0.20243954	0.426342335	FALSE
1630	PF3D7_1116000.iso1.exon2.amp1_3093	0.27844533	0.137612576	0.370957683	-0.140832754	0.133949892	0.425460158	FALSE
1631	PF3D7_1116000.iso1.exon2.amp2_3382	0.035505344	-0.147774897	0.633477516	-0.18328024	0.015572183	0.425460158	FALSE
1632	PF3D7_1116800.e4s1_7224	-0.427911805	-0.617235011	0.358319065	-0.189323206	0.146836496	0.425460158	FALSE
1633	PF3D7_1117000.iso1.exon6.amp1_3500	-0.386866183	-0.361799391	0.104902847	0.025066792	0.661887675	0.750188072	FALSE
1634	PF3D7_1117200.iso1.exon2.amp1_1104	-0.432602346	-0.490826159	0.309569416	-0.058223813	0.20650236	0.426342335	FALSE
1635	PF3D7_1117800.iso1.exon1.amp1_264	-0.365236256	-0.370915394	0.022156396	-0.005679138	0.926206905	0.949787671	FALSE
1636	PF3D7_1117900.iso1.exon1.amp1_2246	-0.204909252	-0.2521035	0.08238978	-0.047194248	0.730968957	0.804410108	FALSE
1637	PF3D7_1118100.iso1.exon1.amp1_3510	-0.714344329	-0.802922866	0.292935468	-0.088578537	0.230803862	0.435427575	FALSE
1638	PF3D7_1118100.iso1.exon2.amp1_2116	-0.230810458	-0.339104861	0.326953527	-0.108294403	0.183316264	0.425460158	FALSE
1639	PF3D7_1118200.e1s1_7968	0.237023617	-0.0299242	0.466083357	-0.266947818	0.064440559	0.425460158	FALSE
1640	PF3D7_1118300.e1s1_7205	-0.321082965	-0.4466177	0.255482871	-0.125534736	0.293533397	0.471401858	FALSE
1641	PF3D7_1118800.2o7_5861	-0.491109265	-0.602599297	0.297829859	-0.111490032	0.223432943	0.430622633	FALSE
1642	PF3D7_1119400.iso1.exon1.amp3_2783	-0.116379285	-0.237060901	0.217722477	-0.120681616	0.36855918	0.517386696	FALSE
1643	PF3D7_1119500.iso1.exon1.amp1_3300	-0.561373144	-0.600262812	0.278049223	-0.038889668	0.254379889	0.449994881	FALSE
1644	PF3D7_1119500.iso1.exon3.amp1_3827	-0.107547284	-0.290674033	0.398257148	-0.183126749	0.109346432	0.425460158	FALSE
1645	PF3D7_1119700.iso1.exon1.amp1_1569	-0.039205755	-0.281927963	0.405645781	-0.242722208	0.103396026	0.425460158	FALSE
1646	PF3D7_1119900.iso1.exon1.amp1_3728	0.08850321	-0.063292613	0.326185101	-0.151795823	0.18429489	0.425460158	FALSE
1647	PF3D7_1120300.2o2_8189	0.208828393	0.06134097	0.553885942	-0.147487422	0.031113722	0.425460158	FALSE
1648	PF3D7_1120400.iso1.exon2.amp1_1793	-0.417989221	-0.604689485	0.443979071	-0.186700264	0.0768356	0.425460158	FALSE
1649	PF3D7_1120700.iso1.exon1.amp2_3653	-0.236185957	-0.378255572	0.475484079	-0.142069616	0.059736742	0.425460158	FALSE
1650	PF3D7_1120800.iso1.exon1.amp1_4126	-0.613267383	-0.728857064	0.44210677	-0.11558968	0.077977185	0.425460158	FALSE
1651	PF3D7_1121200.iso1.exon1.amp1_653	-0.098207841	-0.264236661	0.462993613	-0.16602882	0.066057815	0.425460158	FALSE
1652	PF3D7_1121600.iso1.exon2.amp1_2679	-0.203404396	-0.296891146	0.218350849	-0.09348675	0.367211912	0.516898695	FALSE
1653	PF3D7_1121700.e1s1_5657	-0.311366122	-0.369253723	0.320644527	-0.057887601	0.191476321	0.425460158	FALSE
1654	PF3D7_1121800.s1_7974	1.650820142	1.520338289	0.379423417	-0.130481852	0.125861778	0.425460158	FALSE
1655	PF3D7_1122000.iso1.exon1.amp1_4471	-0.258971994	-0.441913651	0.582567434	-0.182941658	0.024317731	0.425460158	FALSE
1656	PF3D7_1122500.iso1.exon1.amp1_3721	-0.441412414	-0.535499867	0.273083553	-0.094087453	0.262638374	0.452919237	FALSE
1657	PF3D7_1122500.iso1.exon1.amp2_4229	-0.531062176	-0.677617981	0.441624329	-0.146555806	0.078273768	0.425460158	FALSE
1658	PF3D7_1122600.2o2_5848	-0.145214051	-0.350454694	0.394385078	-0.205240643	0.112581021	0.425460158	FALSE
1659	PF3D7_1122800.e1s1_6545	0.391117557	0.288830226	0.531851206	-0.102287331	0.037500045	0.425460158	FALSE
1660	PF3D7_1122900.e1s1_9126	-0.976499177	-1.125320209	0.22748314	-0.148821032	0.348009893	0.504039122	FALSE
1661	PF3D7_1122900.e2s2_7971	0.0365099	-0.223279745	0.441366832	-0.259789645	0.078432475	0.425460158	FALSE
1662	PF3D7_1122900.e2s3_6815	-0.406173317	-0.600201952	0.379981659	-0.194028635	0.125343309	0.425460158	FALSE
1663	PF3D7_1122900.e2s5_7132	0.541590844	0.473345787	0.177421868	-0.068245056	0.461904978	0.586851635	FALSE
1664	PF3D7_1123000.iso1.exon1.amp3_1921	-0.118833984	-0.157096868	0.140870224	-0.038262884	0.557943871	0.660779136	FALSE
1665	PF3D7_1123200.iso1.exon1.amp1_3335	0.674857997	0.708920604	0.098909507	0.034062607	0.680005611	0.76391656	FALSE
1666	PF3D7_1123400.e1_5091	0.347399551	0.136249018	0.32965413	-0.211150533	0.179910176	0.425460158	FALSE
1667	PF3D7_1123500.iso1.exon1.amp1_4580	0.272763833	0.028883806	0.296411291	-0.243880027	0.225550178	0.431112685	FALSE
1668	PF3D7_1124000.1o5_7896	0.054457858	-0.067545083	0.267822957	-0.122002941	0.271605777	0.460421317	FALSE
1669	PF3D7_1124000.2o5_7607	-0.321559932	-0.423274046	0.241379526	-0.101714114	0.320147056	0.486746103	FALSE
1670	PF3D7_1124100.iso1.exon1.amp1_1988	0.17448255	0.070374908	0.271493067	-0.104107642	0.265325786	0.454473735	FALSE
1671	PF3D7_1124300.1o3_7324	0.191238325	-0.056812721	0.327641856	-0.248051046	0.182443212	0.425460158	FALSE
1672	PF3D7_1124400.iso1.exon1.amp1_1806	-0.284762146	-0.361252707	0.269576982	-0.076490562	0.268590711	0.457828787	FALSE
1673	PF3D7_1124500.1o1_7615	0.182122358	0.171213045	0.035522713	-0.010909313	0.881978224	0.919697635	FALSE
1674	PF3D7_1124600.e1s1_5168	-0.143879183	-0.395574564	0.387279585	-0.251695381	0.118730664	0.425460158	FALSE
1675	PF3D7_1124700.e1s1_6312	-0.544595692	-0.592421265	0.236068034	-0.047825573	0.330603882	0.493334604	FALSE
1676	PF3D7_1125300.iso1.exon1.amp1_2856	-0.14647186	-0.194801462	0.141459002	-0.048329602	0.556316332	0.659860827	FALSE
1677	PF3D7_1125300.iso1.exon1.amp2_3352	0.04180643	0.01146043	0.144511666	-0.030346	0.547918621	0.653112	FALSE
1678	PF3D7_1125400.2o2_5277	-0.550258691	-0.598609606	0.160798657	-0.048350915	0.504295683	0.617486941	FALSE
1679	PF3D7_1125700.6o6_7634	-0.441940361	-0.519371298	0.170241218	-0.077430937	0.479945643	0.60052101	FALSE
1680	PF3D7_1125800.1o4_6747	0.714861517	0.441184667	0.63988848	-0.27367685	0.014712574	0.425460158	FALSE
1681	PF3D7_1125800.3o4_6458	-0.790737347	-0.833949299	0.123827867	-0.043211952	0.60612003	0.705797576	FALSE
1682	PF3D7_1126000.e1s2_8344	-0.355162151	-0.477434037	0.364071319	-0.122271886	0.14084828	0.425460158	FALSE
1683	PF3D7_1126100.iso1.exon2.amp2_220	-0.223097843	-0.386350942	0.2814347	-0.163253099	0.248863326	0.446457304	FALSE
1684	PF3D7_1126300.e2_7985	-0.418796524	-0.475999045	0.203244937	-0.057202521	0.400525948	0.536586125	FALSE
1685	PF3D7_1126400.2o3_5535	-0.24640602	-0.374908751	0.480965114	-0.12850273	0.057139524	0.425460158	FALSE
1686	PF3D7_1126500.iso1.exon1.amp1_2267	-0.223056778	-0.384783445	0.376602168	-0.161726667	0.128509942	0.425460158	FALSE
1687	PF3D7_1127000.e6s1_6000	0.007109028	-0.043896624	0.144403836	-0.051005652	0.548214085	0.653112	FALSE
1688	PF3D7_1127300.1o1_7293	-0.421688564	-0.468767614	0.120024008	-0.04707905	0.617144804	0.713891927	FALSE
1689	PF3D7_1127400.iso1.exon1.amp1_2346	-1.001150386	-1.050165909	0.325134843	-0.049015523	0.185639256	0.425460158	FALSE
1690	PF3D7_1127400.iso1.exon2.amp1_2078	-0.423508911	-0.457446351	0.194152273	-0.03393744	0.421505997	0.554103524	FALSE
1691	PF3D7_1127600.iso1.exon2.amp1_349	-0.549747521	-0.63158536	0.397554856	-0.081837839	0.109927092	0.425460158	FALSE
1692	PF3D7_1127700.1o3_4715	0.513179207	0.404801722	0.332314943	-0.108377485	0.176604577	0.425460158	FALSE
1693	PF3D7_1127900.3o3_6444	0.072679558	-0.036133848	0.217672862	-0.108813406	0.368665699	0.517386696	FALSE
1694	PF3D7_1128100.2o3_7845	-0.325202519	-0.432503631	0.188168101	-0.107301112	0.435690502	0.566394404	FALSE
1695	PF3D7_1128300.e1s1_8069	-0.737033495	-0.769636459	0.127544226	-0.032602963	0.595442479	0.696836691	FALSE
1696	PF3D7_1128300.e3s1_8903	-0.341846775	-0.458360222	0.564568009	-0.116513447	0.028397414	0.425460158	FALSE
1697	PF3D7_1128500.1o1_8799	0.125339962	-0.124721791	0.33214648	-0.250061753	0.176812391	0.425460158	FALSE
1698	PF3D7_1129000.e1s1_6583	-0.339021548	-0.46384901	0.402565149	-0.124827462	0.105842078	0.425460158	FALSE
1699	PF3D7_1129100.e1s1_6319	-0.400797844	-0.589207904	0.301932071	-0.188410061	0.21739751	0.43001912	FALSE
1700	PF3D7_1129200.2o4_7594	-0.422232579	-0.587071549	0.33744185	-0.16483897	0.170374484	0.425460158	FALSE
1701	PF3D7_1129500.iso1.exon1.amp1_4492	0.477858458	0.233269835	0.333207935	-0.244588623	0.175506306	0.425460158	FALSE
1702	PF3D7_1129600.e1s1_8953	-0.373159004	-0.515358052	0.475308642	-0.142199048	0.059821609	0.425460158	FALSE
1703	PF3D7_1129700.iso1.exon1.amp1_1271	-0.27174225	-0.317761505	0.25004859	-0.046019255	0.303590715	0.477435987	FALSE
1704	PF3D7_1129800.1o1_9026	0.355508074	0.259932202	0.188703912	-0.095575872	0.434408328	0.565503256	FALSE
1705	PF3D7_1130200_5980	0.797884875	0.762522575	0.112323196	-0.035362301	0.639752447	0.733987668	FALSE
1706	PF3D7_1130400_8004	0.244431338	0.155864636	0.202273958	-0.088566702	0.40273324	0.53825739	FALSE
1707	PF3D7_1131200.iso1.exon1.amp1_62	-0.561711971	-0.615953242	0.1980358	-0.054241271	0.41246049	0.545794815	FALSE
1708	PF3D7_1131200.iso1.exon6.amp1_345	-0.62237523	-0.678033339	0.297427599	-0.055658109	0.224031742	0.431112685	FALSE
1709	PF3D7_1131600.s2_8288	0.179949793	0.102019913	0.213218384	-0.07792988	0.378314244	0.523777652	FALSE
1710	PF3D7_1131800.iso1.exon1.amp1_838	-0.57429868	-0.649957989	0.316857813	-0.075659309	0.196512345	0.426118363	FALSE
1711	PF3D7_1132300.1o1_5547	0.11677525	0.053727705	0.099431433	-0.063047544	0.678419584	0.762745996	FALSE
1712	PF3D7_1132900.1o1_6392	-0.422944609	-0.494505582	0.32129246	-0.071560973	0.190625075	0.425460158	FALSE
1713	PF3D7_1133200.e1s2_5075	0.123244452	-0.087562238	0.367455278	-0.210806691	0.137422033	0.425460158	FALSE
1714	PF3D7_1133400_6235	0.920465767	1.206480279	0.546606655	0.286014511	0.033101876	0.425460158	FALSE
1715	PF3D7_1133500.iso1.exon1.amp1_1264	-0.551531344	-0.595773968	0.14129708	-0.044242624	0.556763675	0.660112197	FALSE
1716	PF3D7_1133500.iso1.exon2.amp1_4149	-0.458976863	-0.507080936	0.210525132	-0.048104073	0.384229466	0.527868408	FALSE
1717	PF3D7_1133700.iso1.exon1.amp1_970	0.011343561	-0.193667854	0.500183598	-0.205011414	0.048822065	0.425460158	FALSE
1718	PF3D7_1133800.iso1.exon1.amp1_1320	-0.292244755	-0.268159162	0.039278903	0.024085593	0.869614446	0.909503395	FALSE
1719	PF3D7_1133900.iso1.exon2.amp2_3355	-0.5578933	-0.67532313	0.243320658	-0.117429829	0.316384922	0.484777772	FALSE
1720	PF3D7_1134000.e1s1_6336	1.238081272	1.103895598	0.283636125	-0.134185674	0.245325365	0.443841997	FALSE
1721	PF3D7_1134200.s1_7422	-0.635532173	-0.731432564	0.198809881	-0.095900391	0.410672595	0.544722906	FALSE
1722	PF3D7_1134300.iso1.exon1.amp1_4294	-0.630421922	-0.727709995	0.430799356	-0.097288073	0.085196391	0.425460158	FALSE
1723	PF3D7_1134300.iso1.exon1.amp2_4583	-0.233968703	-0.369060747	0.346093564	-0.135092044	0.160269097	0.425460158	FALSE
1724	PF3D7_1134300.iso1.exon1.amp3_4228	-0.559486398	-0.633490229	0.226201694	-0.074003832	0.350661641	0.506310629	FALSE
1725	PF3D7_1134500.s1_5988	-0.530543964	-0.594497715	0.327592411	-0.063953752	0.182505814	0.425460158	FALSE
1726	PF3D7_1134500.s2_6572	-1.022422978	-1.11766787	0.23252247	-0.095244891	0.337716874	0.496695696	FALSE
1727	PF3D7_1134700.e1_5101	-0.465969683	-0.566428728	0.237142012	-0.100459045	0.328470295	0.492495221	FALSE
1728	PF3D7_1134700.e2s1_6257	-0.273038493	-0.42668861	0.428784624	-0.153650117	0.086542816	0.425460158	FALSE
1729	PF3D7_1134700.e2s2_6835	0.80263423	0.700471809	0.187194068	-0.102162421	0.43802741	0.56757341	FALSE
1730	PF3D7_1135100.1o1_6774	-0.241051601	-0.357456123	0.343422991	-0.116404522	0.163334418	0.425460158	FALSE
1731	PF3D7_1135400.e1s1_5738	-0.162211754	-0.369590185	0.39231173	-0.20737843	0.114346575	0.425460158	FALSE
1732	PF3D7_1136100.1o1_5019	-0.547499673	-0.686980364	0.425930504	-0.139480691	0.088482226	0.425460158	FALSE
1733	PF3D7_1136200.1o5_8797	0.255895776	0.009304587	0.405773342	-0.246591189	0.103295806	0.425460158	FALSE
1734	PF3D7_1136200.5o5_9080	-0.136346876	-0.365913603	0.48034693	-0.229566727	0.05742725	0.425460158	FALSE
1735	PF3D7_1136300.e2s1_5389	0.473414948	0.514764403	0.127115478	0.041349454	0.59666954	0.69798139	FALSE
1736	PF3D7_1136500.1.e4s1_8282	-0.19950306	-0.320451089	0.303978106	-0.120948029	0.214435382	0.43001912	FALSE
1737	PF3D7_1136600.iso1.exon1.amp1_4586	-0.617704588	-0.690694003	0.252286981	-0.072989416	0.299418212	0.473529987	FALSE
1738	PF3D7_1136700.iso1.exon7.amp1_117	-0.486043727	-0.49573965	0.055706037	-0.009695924	0.815992432	0.867998019	FALSE
1739	PF3D7_1136900.e1s1_7134	0.597600804	0.312559007	0.374479029	-0.285041797	0.130533811	0.425460158	FALSE
1740	PF3D7_1136900.e2s1_4885	-0.399647526	-0.32948366	0.259874249	0.070163867	0.285585876	0.467601669	FALSE
1741	PF3D7_1137100_7714	-0.697909667	-0.809410516	0.376289836	-0.111500849	0.128805994	0.425460158	FALSE
1742	PF3D7_1137300.1o1_6196	-0.185284544	-0.314538637	0.270829236	-0.129254093	0.266453536	0.455439328	FALSE
1743	PF3D7_1137600 (renamed)_7629	0.399640845	0.184760269	0.303091546	-0.214880576	0.215714977	0.43001912	FALSE
1744	PF3D7_1137600.1o2_7251	-0.590669046	-0.640884966	0.294615989	-0.05021592	0.228252037	0.433323433	FALSE
1745	PF3D7_1137900.1o2_5315	-0.367426141	-0.393240778	0.077694822	-0.025814636	0.745705416	0.817738751	FALSE
1746	PF3D7_1137900.2o2_4737	-0.113595469	-0.208376309	0.36170585	-0.094780839	0.143285578	0.425460158	FALSE
1747	PF3D7_1138000.iso1.exon1.amp3_4227	-0.240551483	-0.352789898	0.173646181	-0.112238415	0.471339177	0.592963879	FALSE
1748	PF3D7_1138100.1o1_8413	-0.313906774	-0.427632579	0.308078782	-0.113725805	0.208594262	0.427495451	FALSE
1749	PF3D7_1138400.e1s2_7418	-0.21663491	-0.32883019	0.225205431	-0.11219528	0.352732875	0.507269912	FALSE
1750	PF3D7_1138400.e1s3_5106	-0.188538219	-0.230406341	0.078961404	-0.041868122	0.741719603	0.814323323	FALSE
1751	PF3D7_1138400.e1s4_8575	0.601735085	0.586797158	0.03212039	-0.014937927	0.89320445	0.928985637	FALSE
1752	PF3D7_1138400.e1s5_8576	0.400710677	0.215430718	0.318431222	-0.185279959	0.194407133	0.425460158	FALSE
1753	PF3D7_1138800.3o7_5545	0.102347512	-0.015303887	0.308544982	-0.117651399	0.207938223	0.427149287	FALSE
1754	PF3D7_1139100.iso1.exon1.amp2_3640	-0.204832845	-0.366936946	0.371296314	-0.1621041	0.133618141	0.425460158	FALSE
1755	PF3D7_1139200.iso1.exon2.amp1_3587	-0.382028923	-0.473132767	0.312128934	-0.091103844	0.202949195	0.426342335	FALSE
1756	PF3D7_1139300.e2s1_8655	0.019509752	-0.200502614	0.357749423	-0.220012367	0.147440895	0.425460158	FALSE
1757	PF3D7_1139300.e2s3_8649	1.322532611	1.005720144	0.400842802	-0.316812467	0.107231318	0.425460158	FALSE
1758	PF3D7_1139500.1.e1s1_5751	0.245553289	0.165566717	0.288749289	-0.079986572	0.237256478	0.438030391	FALSE
1759	PF3D7_1140000.2o2_8125	-0.068163186	-0.346810522	0.417285972	-0.278647337	0.094590863	0.425460158	FALSE
1760	PF3D7_1140100 (renamed)_5564	-0.330023161	-0.63074201	0.361272209	-0.300718849	0.143736191	0.425460158	FALSE
1761	PF3D7_1140500.e1s1_7204	-0.636579223	-0.583125582	0.205750311	0.053453641	0.39486726	0.532868287	FALSE
1762	PF3D7_1140900.3o6_8819	-0.451552284	-0.629744256	0.44741066	-0.178191971	0.074781761	0.425460158	FALSE
1763	PF3D7_1140900.5o6_9108	-0.536837984	-0.662138769	0.421633462	-0.125300786	0.091474089	0.425460158	FALSE
1764	PF3D7_1141200.iso1.exon1.amp1_2920	-0.338965845	-0.403720866	0.283252196	-0.06475502	0.245939603	0.444339335	FALSE
1765	PF3D7_1141400.5o5_5552	-0.395272823	-0.45611791	0.198735657	-0.060845088	0.410843811	0.544722906	FALSE
1766	PF3D7_1141900.1o1_6461	-0.496173048	-0.523797559	0.190094124	-0.027624511	0.431092703	0.563482019	FALSE
1767	PF3D7_1142800_7136	0.215779186	0.142137128	0.234562568	-0.073642058	0.333611097	0.494515987	FALSE
1768	PF3D7_1142900.e2_6836	-0.450313265	-0.494680462	0.134029709	-0.044367197	0.577036088	0.678979937	FALSE
1769	PF3D7_1143000.iso1.exon1.amp1_3893	-0.574677919	-0.60461575	0.12132702	-0.02993783	0.613357475	0.711202315	FALSE
1770	PF3D7_1143100.iso1.exon1.amp2_1039	-0.435766238	-0.448208594	0.048892183	-0.012442355	0.838137021	0.88617504	FALSE
1771	PF3D7_1143300.1o1_4684	-0.272159994	-0.365483029	0.367778374	-0.093323035	0.137098592	0.425460158	FALSE
1772	PF3D7_1143900.iso1.exon2.amp1_1547	-0.224929001	-0.423179851	0.532864645	-0.19825085	0.037181424	0.425460158	FALSE
1773	PF3D7_1144200.iso1.exon2.amp1_2141	-0.411256101	-0.497983833	0.358778998	-0.086727732	0.14635001	0.425460158	FALSE
1774	PF3D7_1144500.1o1_6422	-0.599386592	-0.713676578	0.494251992	-0.114289986	0.051263132	0.425460158	FALSE
1775	PF3D7_1144600.iso1.exon1.amp1_3019	-0.693394797	-0.755701679	0.304801558	-0.062306882	0.213252225	0.43001912	FALSE
1776	PF3D7_1145200.iso1.exon1.amp1_1399	-0.453514613	-0.530203405	0.220231559	-0.076688792	0.36319957	0.512671731	FALSE
1777	PF3D7_1145200.iso1.exon1.amp3_2211	-0.270586803	-0.280062831	0.065780435	-0.009476029	0.783548031	0.844052509	FALSE
1778	PF3D7_1145400.e1s1_8368	-0.459317963	-0.558635789	0.300810132	-0.099317826	0.219035352	0.43001912	FALSE
1779	PF3D7_1145500.2o2_8228	-0.626787842	-0.663561244	0.38375429	-0.036773402	0.121886825	0.425460158	FALSE
1780	PF3D7_1145900.iso1.exon2.amp1_376	-0.444681773	-0.518211602	0.533441628	-0.073529829	0.037001146	0.425460158	FALSE
1781	PF3D7_1146000.1o1_8205	0.392961934	0.194527001	0.434919424	-0.198434933	0.082500334	0.425460158	FALSE
1782	PF3D7_1146500.1o1_8151	-0.078651867	-0.291082198	0.496994687	-0.212430331	0.050120893	0.425460158	FALSE
1783	PF3D7_1146700.iso1.exon1.amp1_3331	-0.698756404	-0.755850825	0.294420809	-0.057094421	0.228547284	0.433590382	FALSE
1784	PF3D7_1146800.e3s1_4831	0.615284383	0.373280069	0.34239633	-0.242004314	0.164525583	0.425460158	FALSE
1785	PF3D7_1147200.iso1.exon1.amp3_4233	-0.282320282	-0.34445949	0.182691068	-0.062139207	0.448932809	0.575060574	FALSE
1786	PF3D7_1147800.1.e2s1_5119	-0.468182071	-0.55822246	0.320165145	-0.090040389	0.192108086	0.425460158	FALSE
1787	PF3D7_1147800.iso2.exon1.amp1_325	-0.505590021	-0.668738537	0.398272543	-0.163148516	0.109333733	0.425460158	FALSE
1788	PF3D7_1148900.iso1.exon1.amp1_1825	-0.587708621	-0.65033295	0.302548835	-0.062624329	0.216501237	0.43001912	FALSE
1789	PF3D7_1149000.e1s1_5748	-0.040832381	-0.274918453	0.614581811	-0.234086072	0.01839434	0.425460158	FALSE
1790	PF3D7_1149000.s4 (renamed)_8579	-0.344927034	-0.310386349	0.04664725	0.034540684	0.845464631	0.891234145	FALSE
1791	PF3D7_1149000.s6 (renamed)_7423	0.132562994	0.175194341	0.067200753	0.042631347	0.779005224	0.841811516	FALSE
1792	PF3D7_1149100.iso2.exon1.amp1_4097	-0.440881669	-0.496452128	0.205735636	-0.055570459	0.39490025	0.532868287	FALSE
1793	PF3D7_1149100.iso2.exon2.amp1_3610	-0.590753028	-0.616497912	0.121929835	-0.025744884	0.611609129	0.709831125	FALSE
1794	PF3D7_1149200.e2s1_6829	0.645019008	0.635292089	0.019097735	-0.00972692	0.936368479	0.955301431	FALSE
1795	PF3D7_1149200.e2s2_6546	-0.616496683	-0.680780186	0.261610818	-0.064283503	0.282487142	0.465202053	FALSE
1796	PF3D7_1149500.3o4_7655	0.205109019	0.044835086	0.435001398	-0.160273932	0.082447465	0.425460158	FALSE
1797	PF3D7_1149500.e2_6825	-0.266222255	-0.353411434	0.488260121	-0.087189178	0.05384151	0.425460158	FALSE
1798	PF3D7_1149900.iso1.exon2.amp1_4166	0.891361947	0.597803926	0.339225586	-0.293558021	0.168249449	0.425460158	FALSE
1799	PF3D7_1150000.iso1.exon2.amp1_3314	-0.16547827	-0.370259689	0.490797789	-0.20478142	0.052735443	0.425460158	FALSE
1800	PF3D7_1150200.iso1.exon1.amp1_412	0.37178362	0.145673178	0.654585145	-0.226110442	0.012910509	0.425460158	FALSE
1801	PF3D7_1150300.iso1.exon1.amp1_2740	-0.332496213	-0.55161598	0.511401772	-0.219119767	0.04449392	0.425460158	FALSE
1802	PF3D7_1150400.iso1.exon2.amp1_714	0.823557061	0.745022351	0.209878204	-0.07853471	0.385659468	0.5282709	FALSE
1803	PF3D7_1200100.iso1.exon1.amp2_794	0.195324644	-0.041974624	0.507528075	-0.237299268	0.045946985	0.425460158	FALSE
1804	PF3D7_1200200.iso1.exon1.amp1_2148	-0.094284587	-0.287910512	0.423234001	-0.193625924	0.090349491	0.425460158	FALSE
1805	PF3D7_1200300.e2s1_7189	0.597423053	0.44993859	0.436646681	-0.147484462	0.081392661	0.425460158	FALSE
1806	PF3D7_1200400.iso1.exon1.amp2_776	-0.390111398	-0.448390885	0.285212643	-0.058279487	0.242815428	0.442400559	FALSE
1807	PF3D7_1200400.iso1.exon2.amp1_720	0.651626178	0.366767468	0.53129687	-0.28485871	0.037675394	0.425460158	FALSE
1808	PF3D7_1200500.iso1.exon1.amp1_2436	-0.104391575	-0.246143973	0.368510897	-0.141752399	0.136367655	0.425460158	FALSE
1809	PF3D7_1200600.iso1.exon2.amp3_2805	-0.368826584	-0.643909011	0.371914055	-0.275082427	0.133014733	0.425460158	FALSE
1810	PF3D7_1200800.iso1.exon2.amp1_4209	-0.507885051	-0.550323142	0.175590669	-0.042438091	0.466466128	0.590506106	FALSE
1811	PF3D7_1201200.2o2_4660	-0.713831163	-0.774672242	0.133246921	-0.060841079	0.579242139	0.680718759	FALSE
1812	PF3D7_1201300.1o1_7539	-0.35228607	-0.420176118	0.160615327	-0.067890047	0.504775389	0.617804535	FALSE
1813	PF3D7_1201300_8869	-0.352200218	-0.42753409	0.231539686	-0.075333871	0.339707349	0.498190066	FALSE
1814	PF3D7_1201400.iso1.exon1.amp1_218	1.185946256	1.029838009	0.333868349	-0.156108247	0.174697653	0.425460158	FALSE
1815	PF3D7_1201400.iso1.exon1.amp2_2193	0.458819905	0.273253383	0.412780978	-0.185566522	0.097917984	0.425460158	FALSE
1816	PF3D7_1202200_6847	-0.628595993	-0.708831406	0.15671888	-0.080235413	0.515032723	0.62598689	FALSE
1817	PF3D7_1202300.e14s1_9188	-0.673947144	-0.782436945	0.272410718	-0.108489801	0.263772741	0.452977002	FALSE
1818	PF3D7_1202300.e31s1_7502	0.403394953	0.189890308	0.317387892	-0.213504645	0.195801079	0.425931905	FALSE
1819	PF3D7_1202300.e33s1_5173	-0.17842551	-0.21103766	0.119334698	-0.03261215	0.619152859	0.715624326	FALSE
1820	PF3D7_1202300.e34s1_6594	-0.350079052	-0.421745556	0.390312152	-0.071666504	0.116071751	0.425460158	FALSE
1821	PF3D7_1202600.e1_8857	-0.199504111	-0.240754792	0.17291494	-0.041250681	0.473179621	0.594176291	FALSE
1822	PF3D7_1203700.e3_8270	-0.250730944	-0.33521442	0.194377299	-0.084483476	0.420978425	0.553669561	FALSE
1823	PF3D7_1203900 (renamed)_7587	-0.121393393	-0.268504875	0.382207568	-0.147111482	0.123293994	0.425460158	FALSE
1824	PF3D7_1204300_6840	-0.379865294	-0.458685733	0.337528145	-0.078820439	0.170271175	0.425460158	FALSE
1825	PF3D7_1205100.iso1.exon1.amp1_152	-0.369563096	-0.456541102	0.352349817	-0.086978006	0.153273439	0.425460158	FALSE
1826	PF3D7_1205400.iso1.exon1.amp2_488	-0.413515544	-0.55926569	0.405643088	-0.145750146	0.103398143	0.425460158	FALSE
1827	PF3D7_1205500.e1s1_6267	-0.364880954	-0.529129526	0.393340878	-0.164248572	0.11346726	0.425460158	FALSE
1828	PF3D7_1205500.e1s2_5111	-0.269002411	-0.546230304	0.359550938	-0.277227893	0.145536523	0.425460158	FALSE
1829	PF3D7_1205800.3o4_5646	-0.559528412	-0.560049551	0.001186723	-0.00052114	0.996041409	0.996995567	FALSE
1830	PF3D7_1206000.1o1_7583	-0.490312144	-0.625694841	0.320367846	-0.135382697	0.191840748	0.425460158	FALSE
1831	PF3D7_1206100.e2s1_6587	-0.59985295	-0.639175824	0.320123008	-0.039322873	0.192163697	0.425460158	FALSE
1832	PF3D7_1206600.iso1.exon1.amp1_261	-0.52599248	-0.53411691	0.026690313	-0.00812443	0.911168837	0.94034502	FALSE
1833	PF3D7_1206900 (renamed, has duplicates)_7621	-0.283238103	-0.35359941	0.248451928	-0.070361307	0.306592628	0.47887335	FALSE
1834	PF3D7_1206900.4o4_7049	0.364885003	0.366643775	0.007383731	0.001758772	0.975373994	0.984516299	FALSE
1835	PF3D7_1207000.e3s1_7223	-0.333425402	-0.341931918	0.013886378	-0.008506516	0.95370689	0.967975697	FALSE
1836	PF3D7_1207200.iso1.exon1.amp3_2782	-0.492928254	-0.476811596	0.065851944	0.016116659	0.783319119	0.844052509	FALSE
1837	PF3D7_1207400.2o2_8755	-0.680350772	-0.766890152	0.353861809	-0.086539381	0.151621235	0.425460158	FALSE
1838	PF3D7_1207500.e3s1_6870	-0.418239063	-0.544059961	0.392311448	-0.125820898	0.114346817	0.425460158	FALSE
1839	PF3D7_1207600.1o1_4730	-0.133328379	-0.09887347	0.113529259	0.034454908	0.636186789	0.730793837	FALSE
1840	PF3D7_1208000.iso1.exon1.amp1_342	-0.482260128	-0.598212948	0.445707684	-0.11595282	0.075794826	0.425460158	FALSE
1841	PF3D7_1208100 (renamed, has duplicates)_7883	-0.662463142	-0.698192443	0.146920305	-0.035729301	0.541341098	0.648406851	FALSE
1842	PF3D7_1208100.e2s1_5771	-0.340375377	-0.394556746	0.182854983	-0.054181369	0.448532912	0.575060574	FALSE
1843	PF3D7_1208100.e2s2_5482	-0.011705161	0.098543557	0.168792308	0.110248718	0.483636116	0.602994047	FALSE
1844	PF3D7_1208500.iso1.exon1.amp2_seg1_1423	-0.68019214	-0.718832162	0.125970652	-0.038640021	0.599952129	0.700360437	FALSE
1845	PF3D7_1208800.e1s1_6623	0.601119426	0.336030055	0.365363592	-0.265089372	0.139531498	0.425460158	FALSE
1846	PF3D7_1208900.s1_5377	-0.302333122	-0.391344134	0.205301343	-0.089011013	0.395877416	0.533160554	FALSE
1847	PF3D7_1209400.e1s1_8090	0.145345536	0.019142473	0.339687349	-0.126203063	0.167702879	0.425460158	FALSE
1848	PF3D7_1209500.1.3o3_5905	-0.44311718	-0.524886162	0.275328881	-0.081768982	0.25887944	0.450960176	FALSE
1849	PF3D7_1209500.iso2.exon2.amp1_3320	-0.252625206	-0.277578516	0.05526263	-0.02495331	0.817428831	0.869196224	FALSE
1850	PF3D7_1209900.1o1_8507	-0.775396847	-0.882008334	0.2124579	-0.106611487	0.379978281	0.524340108	FALSE
1851	PF3D7_1210100.1o1_7277	-0.020281391	-0.177601371	0.282618838	-0.15731998	0.246955465	0.445887394	FALSE
1852	PF3D7_1210600.iso1.exon1.amp1_4021	0.525768986	0.204228377	0.41046136	-0.321540609	0.099670523	0.425460158	FALSE
1853	PF3D7_1210600.iso1.exon1.amp2_4535	-0.209978828	-0.462414391	0.364804749	-0.252435563	0.140099667	0.425460158	FALSE
1854	PF3D7_1211000.e3s1_5406	-0.295182594	-0.476419525	0.326325622	-0.181236931	0.184115616	0.425460158	FALSE
1855	PF3D7_1211000.e3s2_8300	0.200838955	0.276334779	0.146806236	0.075495825	0.541651627	0.648501777	FALSE
1856	PF3D7_1211300.e2s1_4865	-0.530295733	-0.541666858	0.10451556	-0.011371125	0.663052103	0.750584617	FALSE
1857	PF3D7_1211600.iso1.exon1.amp2_2832	-0.431819174	-0.592940331	0.421837097	-0.161121157	0.091330331	0.425460158	FALSE
1858	PF3D7_1211900.e1s1_5489	0.518783206	0.395933963	0.254997531	-0.122849244	0.294421604	0.471401893	FALSE
1859	PF3D7_1211900.e2s1_8064	-0.57723151	-0.734380014	0.548378891	-0.157148503	0.032607205	0.425460158	FALSE
1860	PF3D7_1212000 (renamed)_7876	-0.243334794	-0.394305666	0.495210708	-0.150970872	0.050861188	0.425460158	FALSE
1861	PF3D7_1212000.e2s1_5966	-0.423982326	-0.489517566	0.263427934	-0.065535241	0.279271358	0.462832299	FALSE
1862	PF3D7_1212400.1o1_5266	-0.423893035	-0.439316998	0.047722025	-0.015423963	0.841954632	0.88920557	FALSE
1863	PF3D7_1212500.1o1_4735	-0.603896863	-0.734202822	0.378334788	-0.13030596	0.126878082	0.425460158	FALSE
1864	PF3D7_1212700.s1_9130	-0.409178644	-0.596505617	0.435612667	-0.187326973	0.082054174	0.425460158	FALSE
1865	PF3D7_1212800_6558	-0.4078482	-0.502769118	0.39285791	-0.094920918	0.113879188	0.425460158	FALSE
1866	PF3D7_1212900.e1s1_8355	0.767343915	0.651506167	0.144036924	-0.115837748	0.549220111	0.653625015	FALSE
1867	PF3D7_1213400.e1s1_8061	0.200758643	0.118118284	0.457626899	-0.082640359	0.068953658	0.425460158	FALSE
1868	PF3D7_1213500.1o2_5618	-0.657064899	-0.823210901	0.319319281	-0.166146002	0.193226901	0.425460158	FALSE
1869	PF3D7_1214000.iso1.exon2.amp1_2096	-0.24091495	-0.294795808	0.252854282	-0.053880858	0.298367381	0.47240098	FALSE
1870	PF3D7_1215100.e1s1_8868	0.062104463	-0.10583864	0.220339266	-0.167943103	0.362970694	0.512671731	FALSE
1871	PF3D7_1215200.iso1.exon1.amp1_1558	-0.143318781	-0.255748354	0.442795168	-0.112429573	0.077555716	0.425460158	FALSE
1872	PF3D7_1215400.1o1_8489	-0.142094022	-0.312921887	0.331192602	-0.170827866	0.17799283	0.425460158	FALSE
1873	PF3D7_1215900.1o1_5893	-0.33455917	-0.43088847	0.157134234	-0.0963293	0.513933715	0.625193118	FALSE
1874	PF3D7_1216300.iso1.exon1.amp1_2121	-0.0332147	-0.092334342	0.125237317	-0.059119641	0.602059511	0.702235803	FALSE
1875	PF3D7_1216500.e1s1_7177	-0.360902032	-0.388971214	0.155361035	-0.028069182	0.518634796	0.629273894	FALSE
1876	PF3D7_1216600_6846	0.321725941	0.199065142	0.223995432	-0.1226608	0.355259793	0.508758151	FALSE
1877	PF3D7_1216900.e1s1_6556	-0.6158296	-0.611638328	0.008094729	0.004191272	0.97300364	0.98352639	FALSE
1878	PF3D7_1217900.3o3_5875	-0.217305964	-0.271428121	0.272894073	-0.054122157	0.262957455	0.452919237	FALSE
1879	PF3D7_1218200.e1s2_6823	-0.333139403	-0.421980948	0.365815531	-0.088841545	0.139073431	0.425460158	FALSE
1880	PF3D7_1218500.e3s1_4808	-0.603292998	-0.66837078	0.223268441	-0.065077782	0.35678399	0.509460095	FALSE
1881	PF3D7_1218600.e2s1_6329	-0.439610009	-0.618318508	0.502606916	-0.178708499	0.047855717	0.425460158	FALSE
1882	PF3D7_1219000.iso1.exon1.amp1_seg1_4603	0.267217428	0.177756062	0.230878159	-0.089461366	0.341051778	0.498956805	FALSE
1883	PF3D7_1219100.e1s1_9152	-0.206145142	-0.428910521	0.342496866	-0.222765379	0.164408624	0.425460158	FALSE
1884	PF3D7_1219100.e1s2_9153	-0.456953701	-0.614034518	0.393535423	-0.157080817	0.113301692	0.425460158	FALSE
1885	PF3D7_1219300.iso1.exon1.amp1_4486	-0.120354756	-0.281086306	0.633895471	-0.160731549	0.015514706	0.425460158	FALSE
1886	PF3D7_1219600.iso1.exon3.amp1_2541	-0.150733079	-0.239631233	0.182339983	-0.088898154	0.44979008	0.575516967	FALSE
1887	PF3D7_1219600.iso1.exon3.amp2_2830	-0.366023625	-0.436592574	0.180933825	-0.070568949	0.453233725	0.578982854	FALSE
1888	PF3D7_1219700.e1s1_6308	-0.364428307	-0.535663006	0.562315851	-0.171234699	0.028950925	0.425460158	FALSE
1889	PF3D7_1219800.iso1.exon1.amp1_616	-0.574656164	-0.802732268	0.430713201	-0.228076104	0.085253588	0.425460158	FALSE
1890	PF3D7_1219900.1o1_5820	-0.298033753	-0.407836468	0.228736743	-0.109802715	0.345429241	0.501337262	FALSE
1891	PF3D7_1220100.1o1_7044	-0.189687909	-0.194180141	0.029669072	-0.004492233	0.901307393	0.935677871	FALSE
1892	PF3D7_1220300.iso1.exon1.amp1_2695	-0.292359476	-0.365452714	0.281547749	-0.073093238	0.248680701	0.446457304	FALSE
1893	PF3D7_1220600.2o4_7295	-0.290641683	-0.230730017	0.119102199	0.059911667	0.61983086	0.716112786	FALSE
1894	PF3D7_1221000.e1s1_8662	-0.366418547	-0.463307604	0.444564113	-0.096889057	0.076481942	0.425460158	FALSE
1895	PF3D7_1221000.e1s3_4910	0.691651662	0.301600134	0.427995304	-0.390051528	0.087075394	0.425460158	FALSE
1896	PF3D7_1221300.iso1.exon6.amp1_1262	-0.153946901	-0.090790787	0.11842289	0.063156114	0.621813845	0.718107916	FALSE
1897	PF3D7_1221400.e1s1_6610	-0.017739546	-0.042204109	0.202329541	-0.024464563	0.40260667	0.53825739	FALSE
1898	PF3D7_1221500.1o1_6483	-0.132590179	-0.264527024	0.254326864	-0.131936845	0.2956522	0.471905117	FALSE
1899	PF3D7_1221600.1o1_4708	0.500535307	0.287298877	0.442400748	-0.21323643	0.07779695	0.425460158	FALSE
1900	PF3D7_1221900.1o1_9091	-0.395312365	-0.52909925	0.296628719	-0.133786884	0.225224654	0.431112685	FALSE
1901	PF3D7_1222300.e1s1_9154	-1.040364348	-0.927186375	0.303314359	0.113177973	0.215392822	0.43001912	FALSE
1902	PF3D7_1222600 (renamed, has duplicates)_6843	1.823906515	1.54959365	0.420195905	-0.274312865	0.092494602	0.425460158	FALSE
1903	PF3D7_1222600.e1s1_5687	-0.364509323	-0.4829055	0.303704883	-0.118396178	0.214829094	0.43001912	FALSE
1904	PF3D7_1222700.1o1_8121	-0.325881357	-0.206076625	0.186542564	0.119804733	0.439594882	0.568933449	FALSE
1905	PF3D7_1223100.e3s1_6322	-0.490920361	-0.586169631	0.456103258	-0.095249269	0.069796265	0.425460158	FALSE
1906	PF3D7_1223600.1o2_8535	-0.18438932	-0.314562141	0.224959261	-0.130172821	0.35324596	0.507429136	FALSE
1907	PF3D7_1223600.e1_5670	0.237140904	0.108127604	0.2844683	-0.1290133	0.243998016	0.44333094	FALSE
1908	PF3D7_1223600.e2s1_8263	-0.241583162	-0.363796427	0.247871085	-0.122213264	0.307689981	0.479404856	FALSE
1909	PF3D7_1223700.1o2_5258	0.301859171	0.144644589	0.280930459	-0.157214582	0.249679152	0.447266484	FALSE
1910	PF3D7_1223800.iso1.exon1.amp1_short_2872	-0.355683856	-0.508064247	0.325880526	-0.152380391	0.184683946	0.425460158	FALSE
1911	PF3D7_1223900.iso1.exon1.amp1_106	-0.55242739	-0.57840734	0.147704744	-0.02597995	0.539208261	0.647234573	FALSE
1912	PF3D7_1224200.1o5_7077	-0.399190515	-0.459463015	0.242790412	-0.060272501	0.317409446	0.485862992	FALSE
1913	PF3D7_1224500.2o2_4969	0.456193521	0.232912504	0.294652831	-0.223281017	0.22819634	0.433323433	FALSE
1914	PF3D7_1225600.e2s1_7774	-0.471288617	-0.518373303	0.246797625	-0.047084686	0.309725462	0.480562952	FALSE
1915	PF3D7_1226000.e1_5411	-0.152875261	-0.181472422	0.161006089	-0.028597161	0.503753224	0.617361906	FALSE
1916	PF3D7_1226100.1o1_4971	-0.354357474	-0.494981305	0.390692277	-0.140623831	0.115742085	0.425460158	FALSE
1917	PF3D7_1226300.e1s1_6601	-0.566437938	-0.640949314	0.280258942	-0.074511376	0.250768781	0.447869848	FALSE
1918	PF3D7_1226400.iso1.exon3.amp1_1587	-0.121988365	-0.281895088	0.401255898	-0.159906723	0.106896689	0.425460158	FALSE
1919	PF3D7_1226800.2o5_6721	-0.328184259	-0.489540928	0.460166252	-0.161356669	0.067569558	0.425460158	FALSE
1920	PF3D7_1227100.e1s1_4898	0.300868535	0.06808771	0.278754436	-0.232780825	0.253223173	0.449851685	FALSE
1921	PF3D7_1227200.iso1.exon1.amp2_815	-0.289559456	-0.439283968	0.493036438	-0.149724513	0.05177692	0.425460158	FALSE
1922	PF3D7_1227300.e1s2_8357	-0.373032795	-0.469790225	0.212516081	-0.09675743	0.379850801	0.524340108	FALSE
1923	PF3D7_1227500.2o2_5357	-0.206020676	-0.203906867	0.003670528	0.002113809	0.987756565	0.992713049	FALSE
1924	PF3D7_1228100.iso1.exon2.amp1_2994	-0.038627434	-0.146885561	0.222534909	-0.108258127	0.358326447	0.510140442	FALSE
1925	PF3D7_1228100.iso1.exon3.amp1_2404	-0.589112469	-0.651497447	0.216231823	-0.062384978	0.37176863	0.518355596	FALSE
1926	PF3D7_1228300.iso1.exon1.amp1_2480	-0.544206958	-0.542752492	0.004111869	0.001454467	0.986284574	0.992300662	FALSE
1927	PF3D7_1228400.s2_4794	-0.160498881	-0.270729279	0.154715897	-0.110230398	0.52035117	0.630810498	FALSE
1928	PF3D7_1228600.e1s1_5187	-0.268790847	-0.353430413	0.280811721	-0.084639566	0.249871558	0.447266484	FALSE
1929	PF3D7_1228700.iso1.exon1.amp1_seg2_1438	-0.543201921	-0.664023652	0.367048715	-0.120821731	0.137829942	0.425460158	FALSE
1930	PF3D7_1228800.e1s1_8000	-0.581237564	-0.72305626	0.206450729	-0.141818696	0.393294748	0.532615983	FALSE
1931	PF3D7_1228800.e1s4_5484	-0.166183333	-0.206092694	0.250854122	-0.039909361	0.302084325	0.476402952	FALSE
1932	PF3D7_1229300.1o1_8528	-0.308394062	-0.504749424	0.276196533	-0.196355361	0.257437822	0.450960176	FALSE
1933	PF3D7_1229600.iso1.exon2.amp1_804	0.005534326	-0.228116411	0.353256298	-0.233650737	0.152281114	0.425460158	FALSE
1934	PF3D7_1229600.iso1.exon2.amp2_1093	0.585628206	0.335731735	0.406302657	-0.249896471	0.102880837	0.425460158	FALSE
1935	PF3D7_1230000.iso1.exon10.amp2_1646	-0.413387582	-0.531909045	0.315058072	-0.118521464	0.19894266	0.426342335	FALSE
1936	PF3D7_1230000.iso1.exon2.amp1_2063	-0.60336681	-0.726432837	0.317663197	-0.123066027	0.195432483	0.425460158	FALSE
1937	PF3D7_1230000.iso1.exon6.amp1_333	-0.381746621	-0.59762823	0.526755576	-0.215881609	0.039140765	0.425460158	FALSE
1938	PF3D7_1230400.5o5_7268	-0.19894972	-0.268980293	0.173490185	-0.070030573	0.471731438	0.593154687	FALSE
1939	PF3D7_1230600.iso1.exon1.amp1_71	-0.410420186	-0.502296748	0.395146501	-0.091876562	0.111938537	0.425460158	FALSE
1940	PF3D7_1230700.1o1_6777	-0.043537324	-0.238503321	0.330245098	-0.194965997	0.179171702	0.425460158	FALSE
1941	PF3D7_1231000.iso1.exon7.amp1_4124	-0.022407522	-0.269694392	0.41466087	-0.24728687	0.09651741	0.425460158	FALSE
1942	PF3D7_1231400.iso1.exon4.amp1_924	-0.022341197	-0.3314887	0.62274025	-0.309147503	0.017120602	0.425460158	FALSE
1943	PF3D7_1231500.1o1_4656	-0.590539522	-0.684989435	0.307482814	-0.094449913	0.209435293	0.428029564	FALSE
1944	PF3D7_1231600.iso1.exon1.amp2_1920	-0.444226977	-0.585373915	0.297484923	-0.141146938	0.223946333	0.431112685	FALSE
1945	PF3D7_1232000.1o2_6457	-0.40270086	-0.466959351	0.233453709	-0.064258491	0.335838347	0.495994122	FALSE
1946	PF3D7_1232100.e1_8842	-0.487162661	-0.553218409	0.179202732	-0.066055748	0.457495337	0.582833678	FALSE
1947	PF3D7_1232100.e2_4807	-0.30144237	-0.363769282	0.275775954	-0.062326912	0.25813586	0.450960176	FALSE
1948	PF3D7_1232600.iso1.exon1.amp1_709	-0.423421035	-0.569767752	0.384908621	-0.146346717	0.12084558	0.425460158	FALSE
1949	PF3D7_1232700.iso1.exon1.amp1_3259	-0.572103968	-0.668758889	0.315963252	-0.096654921	0.197717355	0.426342335	FALSE
1950	PF3D7_1233200.iso2.exon1.amp1_3096	-0.522189722	-0.731615589	0.292761977	-0.209425868	0.231068556	0.435427575	FALSE
1951	PF3D7_1233200.iso2.exon1.amp2_seg2_2883	-0.642902038	-0.79159466	0.289559701	-0.148692622	0.235996564	0.437118073	FALSE
1952	PF3D7_1233200.iso2.exon1.amp3_seg1_1729	-0.095685593	-0.374688228	0.393332576	-0.279002635	0.11347433	0.425460158	FALSE
1953	PF3D7_1233300.s1_7401	-0.085684159	-0.022481151	0.150945289	0.063203007	0.530446322	0.639729671	FALSE
1954	PF3D7_1233300.s2_5950	-0.448343927	-0.568834703	0.445668011	-0.120490776	0.075818572	0.425460158	FALSE
1955	PF3D7_1233400.1o4_5291	0.13396213	0.042176357	0.174121746	-0.091785773	0.470144549	0.592792608	FALSE
1956	PF3D7_1233600.e1s3_8293	-0.659811289	-0.726520237	0.272625707	-0.066708948	0.26340988	0.452919237	FALSE
1957	PF3D7_1233700.iso1.exon1.amp1_1031	-0.309257366	-0.420773492	0.302446374	-0.111516126	0.216649931	0.43001912	FALSE
1958	PF3D7_1233800.3o3_4664	-0.444337784	-0.434063771	0.027955134	0.010274014	0.906979616	0.938439425	FALSE
1959	PF3D7_1234300.2o2_6755	-0.371981437	-0.510486496	0.521334831	-0.138505059	0.04095886	0.425460158	FALSE
1960	PF3D7_1234600.iso1.exon1.amp1_2569	-0.483562883	-0.511425053	0.08742647	-0.027862171	0.715279503	0.793058018	FALSE
1961	PF3D7_1234600.iso1.exon1.amp2_3083	-0.500623635	-0.470354174	0.173855012	0.030269461	0.470814364	0.592799047	FALSE
1962	PF3D7_1234700.iso1.exon2.amp1_2955	-0.021021801	-0.059616506	0.106084819	-0.038594705	0.65833945	0.747664568	FALSE
1963	PF3D7_1234800.e1s1_7490	-0.39923883	-0.494659453	0.313995006	-0.095420623	0.200389402	0.426342335	FALSE
1964	PF3D7_1234800.e1s2_8941	0.004407349	-0.113170663	0.316757906	-0.117578011	0.196646634	0.426118363	FALSE
1965	PF3D7_1235000.iso1.exon2.amp1_3863	-0.634317276	-0.736959756	0.479936921	-0.10264248	0.057618807	0.425460158	FALSE
1966	PF3D7_1235000.iso1.exon3.amp1_650	0.681007149	0.503921721	0.292604259	-0.177085427	0.23130939	0.435588671	FALSE
1967	PF3D7_1235200.iso1.exon2.amp1_3400	-0.373253315	-0.533374294	0.289545359	-0.160120979	0.236018817	0.437118073	FALSE
1968	PF3D7_1235200.iso1.exon2.amp2_2539	-0.03509909	-0.206163484	0.261503063	-0.171064394	0.282678696	0.465202053	FALSE
1969	PF3D7_1235400.e1s2_5177	-0.33827977	-0.387429589	0.312412114	-0.049149818	0.202559079	0.426342335	FALSE
1970	PF3D7_1235800.iso1.exon4.amp1_2414	-0.417610412	-0.454019568	0.162720657	-0.036409156	0.499282328	0.613760476	FALSE
1971	PF3D7_1236000.1o1_6739	0.435507103	0.410703787	0.051665893	-0.024803316	0.82910461	0.878740821	FALSE
1972	PF3D7_1236100.e2s1_7758	0.451437761	0.103629973	0.339658164	-0.347807788	0.167737381	0.425460158	FALSE
1973	PF3D7_1236200.iso1.exon1.amp2_4226	-0.651014926	-0.748129434	0.222853219	-0.097114508	0.35765655	0.510053513	FALSE
1974	PF3D7_1236300.1o1_5000	-0.519487954	-0.566881675	0.205313366	-0.047393721	0.395850342	0.533160554	FALSE
1975	PF3D7_1236500.1o1_7853	-0.268472734	-0.223704676	0.059424471	0.044768057	0.803973695	0.860764506	FALSE
1976	PF3D7_1237300.iso1.exon3.amp1_116	-0.392922931	-0.390437453	0.007013745	0.002485478	0.976607565	0.985038709	FALSE
1977	PF3D7_1237400.3o3_5573	-0.321243698	-0.405517965	0.334052136	-0.084274267	0.174473152	0.425460158	FALSE
1978	PF3D7_1237400.e3_7403	-0.101885134	-0.194883232	0.312815756	-0.092998098	0.20200404	0.426342335	FALSE
1979	PF3D7_1237900.iso1.exon1.amp1_4591	-0.679686905	-0.708963031	0.176283579	-0.029276126	0.46473703	0.589115114	FALSE
1980	PF3D7_1238200.iso1.exon1.amp1_3886	-0.722531136	-0.729578633	0.057304662	-0.007047497	0.810819371	0.864462934	FALSE
1981	PF3D7_1238400.iso1.exon4.amp1_630	-0.271640615	-0.41688513	0.484142562	-0.145244515	0.05568113	0.425460158	FALSE
1982	PF3D7_1238600.iso1.exon1.amp1_1581	-0.570460301	-0.71014281	0.333651394	-0.139682509	0.174962971	0.425460158	FALSE
1983	PF3D7_1238800.e1s1_6061	0.473024033	0.22137748	0.359648594	-0.251646552	0.14543388	0.425460158	FALSE
1984	PF3D7_1239200.e1s2_7139	-0.686799565	-0.805731868	0.28477065	-0.118932303	0.243517122	0.443103185	FALSE
1985	PF3D7_1239400.1o1_5240	-1.035986761	-1.062754661	0.198853082	-0.0267679	0.41057296	0.544722906	FALSE
1986	PF3D7_1239600.1o1_9028	-0.378026751	-0.532001462	0.340966528	-0.153974711	0.166196355	0.425460158	FALSE
1987	PF3D7_1239700.e1s1_5983	0.351105318	0.209244875	0.499085323	-0.141860442	0.049265874	0.425460158	FALSE
1988	PF3D7_1239800.s5_6570	0.480821695	0.465505495	0.047488514	-0.0153162	0.842716944	0.889665329	FALSE
1989	PF3D7_1240000.iso1.exon1.amp1_735	-0.565185434	-0.643632874	0.165268203	-0.07844744	0.492681989	0.608492327	FALSE
1990	PF3D7_1240300.iso1.exon1.amp2_2520	-0.339586647	-0.352875175	0.086886789	-0.013288528	0.716954514	0.793973324	FALSE
1991	PF3D7_1240300.iso1.exon2.amp1_4487	0.8142741	0.592514646	0.676739573	-0.221759455	0.010589793	0.425460158	FALSE
1992	PF3D7_1240400.iso1.exon2.amp1_1013	1.099318743	1.069385726	0.059528154	-0.029933017	0.803639279	0.860735118	FALSE
1993	PF3D7_1240600.iso1.exon2.amp1_2168	-0.145877505	-0.249145094	0.578077161	-0.10326759	0.025280378	0.425460158	FALSE
1994	PF3D7_1240900.iso1.exon3.amp1_1880	0.71540576	0.597539391	0.31687048	-0.117866369	0.196495326	0.426118363	FALSE
1995	PF3D7_1240900.iso1.exon4.amp2_3972	-0.051459745	-0.191390056	0.280675009	-0.139930311	0.25009323	0.447266484	FALSE
1996	PF3D7_1241300.iso1.exon1.amp1_2759	0.094601939	0.0128615	0.206038334	-0.081740439	0.394220116	0.532719618	FALSE
1997	PF3D7_1241400.iso1.exon1.amp2_seg2_276	-0.12453982	-0.40144942	0.505099493	-0.2769096	0.046880044	0.425460158	FALSE
1998	PF3D7_1241700.e2s1_7179	-0.322551542	-0.448549806	0.346299366	-0.125998264	0.160034854	0.425460158	FALSE
[truncated: 806 more rows]
