# Supplementary material for: Proteome-wide analysis of a malaria vaccine study reveals personalized humoral immune profiles in Tanzanian adults
Source: eLife. 2020 Jul 14;9:e53080. doi: 10.7554/eLife.53080 (PMC7386907; doi:10.7554/eLife.53080)
Supplement: Figure 4—source data 3. [file elife-53080-fig4-data3.csv]

GROUP 3
	protein_ID	mean_seorpositivy_time1	mean_seorpositivy_time2	size_eff	log_FC	p_value	adj.p_value	is_threshold_reached
244	PF3D7_0304600_7131	-0.712304294	0.114350763	1.251212981	0.826655057	2.14E-05	0.060004079	FALSE
1714	PF3D7_1133400_6235	1.257662899	1.896601271	0.940977171	0.638938372	0.000476347	0.667838015	FALSE
1491	PF3D7_1030200.1o1_4717	0.202645536	0.992813973	0.83147235	0.790168437	0.00145712	0.999885054	FALSE
1512	PF3D7_1035300.iso1.exon1.amp1_2847	-0.055501844	0.089189955	0.771497461	0.144691799	0.002681457	0.999885054	FALSE
1597	PF3D7_1108100.iso1.exon1.amp1_2831	-0.749241457	-0.650779907	0.765216941	0.09846155	0.002857567	0.999885054	FALSE
1449	PF3D7_1020200.e2s1_4857	-0.298902968	-0.221113904	0.754606261	0.077789064	0.003181312	0.999885054	FALSE
535	PF3D7_0508900.iso1.exon1.amp2_1967	-0.348329067	-0.257152288	0.6979452	0.091176779	0.005621538	0.999885054	FALSE
283	PF3D7_0312400.2o7_8753	0.236476189	0.724876748	0.690449343	0.488400559	0.006057787	0.999885054	FALSE
1766	PF3D7_1141900.1o1_6461	-0.539364751	-0.618112067	0.646859716	-0.078747316	0.0093241	0.999885054	FALSE
1471	PF3D7_1022700.1o1_7854	-0.737021177	-0.598772735	0.643642431	0.138248441	0.009623236	0.999885054	FALSE
770	PF3D7_0628100.iso1.exon1.amp6_2244	-0.647979252	-0.536240018	0.637809976	0.111739234	0.010189215	0.999885054	FALSE
1708	PF3D7_1131200.iso1.exon6.amp1_345	-0.699799156	-0.751500634	0.629588913	-0.051701478	0.011041542	0.999885054	FALSE
1006	PF3D7_0802300.iso1.exon1.amp2_1927	-0.633860902	-0.484327647	0.627464531	0.149533255	0.011272667	0.999885054	FALSE
1305	PF3D7_0931300.1o1_6427	-0.595860767	-0.673913604	0.626947711	-0.078052837	0.011329593	0.999885054	FALSE
2328	PF3D7_1355600.iso1.exon2.amp1_2144	-0.620243143	-0.552312713	0.626281095	0.06793043	0.011403424	0.999885054	FALSE
2145	PF3D7_1314900.5o5_6732	-0.78890933	-0.703596228	0.618696749	0.085313102	0.012276531	0.999885054	FALSE
1490	PF3D7_1029500.1o1_4650	-0.216644596	-0.076212183	0.614906788	0.140432413	0.012736436	0.999885054	FALSE
1250	PF3D7_0917300.1o1_6428	-0.596137033	-0.661024029	0.605896717	-0.064886996	0.013896734	0.999885054	FALSE
2522	PF3D7_1427300.iso1.exon1.amp1_1946	-0.21555049	-0.126409365	0.598172928	0.089141125	0.014970919	0.999885054	FALSE
1610	PF3D7_1111800.iso1.exon2.amp1_2710	0.163948884	0.259295669	0.589667934	0.095346785	0.016244922	0.999885054	FALSE
1529	PF3D7_1037100.1o1_9098	-0.149928225	-0.01884885	0.583596944	0.131079376	0.017216515	0.999885054	FALSE
447	PF3D7_0420000.s2_5994	-0.346807097	-0.206093927	0.571161202	0.140713171	0.019380974	0.999885054	FALSE
2476	PF3D7_1416200.iso1.exon1.amp2_1114	-0.381883012	-0.314693312	0.57103998	0.067189701	0.019403285	0.999885054	FALSE
1465	PF3D7_1021800.iso1.exon2.amp1_3703	0.802585334	0.932250867	0.569337543	0.129665533	0.019719192	0.999885054	FALSE
1756	PF3D7_1139300.e2s1_8655	-0.033366332	0.055760239	0.565039557	0.089126571	0.020538434	0.999885054	FALSE
2715	PF3D7_1464000.e1s1_6353	-0.196376643	0.026458152	0.563682992	0.222834794	0.020803592	0.999885054	FALSE
738	PF3D7_0621400.1o1_8784	0.027026063	0.145900451	0.562765011	0.118874388	0.020984847	0.999885054	FALSE
470	PF3D7_0424800.2o2_6416	0.639843338	0.517796492	0.554750672	-0.122046846	0.022631536	0.999885054	FALSE
948	PF3D7_0727000.iso1.exon1.amp1_1996	-0.597732987	-0.539346202	0.554065483	0.058386785	0.022777809	0.999885054	FALSE
1692	PF3D7_1127700.1o3_4715	0.295264125	0.439554876	0.552113007	0.144290752	0.023199498	0.999885054	FALSE
2251	PF3D7_1337700.iso1.exon1.amp1_3274	-0.321434628	-0.230882165	0.551692479	0.090552463	0.023291275	0.999885054	FALSE
397	PF3D7_0409500.2o2_7867	-0.280168699	-0.181405187	0.547117026	0.098763513	0.024312055	0.999885054	FALSE
2354	PF3D7_1360500.6o14_7959	-0.792307321	-0.728272169	0.545875458	0.064035152	0.024596184	0.999885054	FALSE
178	PF3D7_0217400.2o2_6962	0.117670939	0.343303074	0.544487319	0.225632135	0.024917531	0.999885054	FALSE
2767	PF3D7_1473100.e2s1_8340	1.198588419	1.333957586	0.544060488	0.135369166	0.025017126	0.999885054	FALSE
2717	PF3D7_1464500.iso1.exon1.amp2_1073	-0.86374146	-0.761385372	0.542597037	0.102356087	0.025361435	0.999885054	FALSE
1887	PF3D7_1219600.iso1.exon3.amp2_2830	0.028256573	0.153340194	0.541809238	0.125083621	0.025548609	0.999885054	FALSE
1387	PF3D7_1011300.1o1_5319	-0.94550067	-0.886881095	0.534000583	0.058619575	0.027474886	0.999885054	FALSE
949	PF3D7_0727200.1o1_6756	-0.314947552	-0.2005828	0.532238042	0.114364752	0.027928002	0.999885054	FALSE
3	MAL8P1.143_3o15_6506	-0.204715975	-0.315790107	0.527706308	-0.111074132	0.029125141	0.999885054	FALSE
2574	PF3D7_1437800.1o1_6975	-0.408203467	-0.310690162	0.52652377	0.097513305	0.029445282	0.999885054	FALSE
2711	PF3D7_1462800.e2_7397	-0.131680781	-0.045598884	0.524392913	0.086081897	0.030030419	0.999885054	FALSE
2458	PF3D7_1410400.e1s1_7222	2.347411339	2.50303705	0.523854429	0.15562571	0.030179986	0.999885054	FALSE
2725	PF3D7_1465800.e5s2_9170	-0.664884002	-0.521756747	0.52310769	0.143127255	0.03038854	0.999885054	FALSE
1684	PF3D7_1126300.e2_7985	-0.653979075	-0.550806226	0.520701352	0.103172849	0.031069725	0.999885054	FALSE
2248	PF3D7_1335900_7674	-0.675555742	-0.179705516	0.515618328	0.495850226	0.032555362	0.999885054	FALSE
1062	PF3D7_0810900.1.1o2_7001	-0.418888917	-0.350869463	0.514834395	0.068019454	0.032790249	0.999885054	FALSE
2180	PF3D7_1322200.e1s2_9159	-0.657516426	-0.541232513	0.514332858	0.116283913	0.032941343	0.999885054	FALSE
2786	PF3D7_1476800.1o1_6431	-0.504448066	-0.564816456	0.5111073	-0.06036839	0.033928556	0.999885054	FALSE
122	PF3D7_0206200.1o1_7052	-0.395395152	-0.321463778	0.510758219	0.073931374	0.034037017	0.999885054	FALSE
686	PF3D7_0607300.2o2_5577	-0.551716139	-0.438146462	0.50992746	0.113569678	0.034296428	0.999885054	FALSE
1039	PF3D7_0807700.1o5_5328	-0.84585168	-0.75894106	0.509657868	0.08691062	0.034381001	0.999885054	FALSE
2382	PF3D7_1368100.e2s1_7178	-0.722660789	-0.624371094	0.505929923	0.098289695	0.035570373	0.999885054	FALSE
2207	PF3D7_1328600.iso1.exon6.amp1_1223	-0.291709146	-0.357145161	0.505562586	-0.065436015	0.035689597	0.999885054	FALSE
1075	PF3D7_0815300.iso1.exon1.amp1_4308	-0.31850184	-0.250246318	0.501128678	0.068255521	0.037157993	0.999885054	FALSE
2101	PF3D7_1305700.1o1_6964	2.33625805	2.444838991	0.4999646	0.108580941	0.037552606	0.999885054	FALSE
1238	PF3D7_0914100.iso1.exon1.amp1_2279	-0.931916911	-0.871365449	0.497262118	0.060551463	0.038483611	0.999885054	FALSE
1953	PF3D7_1233300.s1_7401	-0.139184987	-0.045397322	0.496232761	0.093787666	0.038843761	0.999885054	FALSE
1636	PF3D7_1117900.iso1.exon1.amp1_2246	-0.512038948	-0.394264238	0.496025023	0.117774709	0.038916818	0.999885054	FALSE
2033	PF3D7_1251700.2o2_4740	-0.209596141	-0.098460603	0.494257805	0.111135537	0.039543423	0.999885054	FALSE
174	PF3D7_0216400.1o1_7065	-0.784143086	-0.647975944	0.492175769	0.136167141	0.040293509	0.999885054	FALSE
358	PF3D7_0402000.e1s1_9149	-0.574768399	-0.504048307	0.491803877	0.070720092	0.040428853	0.999885054	FALSE
1462	PF3D7_1021700.e1s3_8087	-1.023083716	-0.922368645	0.490796654	0.100715071	0.040797505	0.999885054	FALSE
1246	PF3D7_0916700.e1s1_6618	-0.506297577	-0.571606706	0.487124903	-0.06530913	0.042167586	0.999885054	FALSE
1034	PF3D7_0806700.iso1.exon1.amp1_1804	-0.478622928	-0.547733649	0.485726838	-0.069110721	0.042700219	0.999885054	FALSE
2250	PF3D7_1337400.iso1.exon3.amp1_3847	0.195739273	0.299968686	0.485654718	0.104229413	0.042727862	0.999885054	FALSE
1639	PF3D7_1118200.e1s1_7968	0.058825989	0.168518276	0.484914396	0.109692287	0.043012557	0.999885054	FALSE
2199	PF3D7_1327100.iso1.exon16.amp1_2378	-0.185236821	-0.123633263	0.484728098	0.061603558	0.043084472	0.999885054	FALSE
1558	PF3D7_1100200.e1s1_7391	-0.609084989	-0.498235924	0.484700566	0.110849065	0.043095109	0.999885054	FALSE
920	PF3D7_0721700_4819	-0.37175856	-0.272973777	0.48369845	0.098784784	0.043483916	0.999885054	FALSE
1216	PF3D7_0909100.1o1_4745	-0.452472401	-0.380400344	0.481942308	0.072072057	0.044172997	0.999885054	FALSE
1570	PF3D7_1102200.iso1.exon1.amp1_2170	-0.446019826	-0.250102897	0.481801269	0.195916928	0.044228768	0.999885054	FALSE
1178	PF3D7_0902800.4o4_7941	-0.115182004	0.080849644	0.480856491	0.196031648	0.044604018	0.999885054	FALSE
1939	PF3D7_1230600.iso1.exon1.amp1_71	-0.473495088	-0.536974293	0.480191627	-0.063479204	0.044869826	0.999885054	FALSE
2349	PF3D7_1359600.iso1.exon1.amp2_3422	-0.314121733	-0.195043786	0.478802609	0.119077947	0.045429807	0.999885054	FALSE
2518	PF3D7_1426700.e1s2_6044	-0.338783386	-0.22838956	0.478373341	0.110393826	0.045604148	0.999885054	FALSE
936	PF3D7_0726100.2o2_6782	-0.578695458	-0.481548194	0.47677908	0.097147264	0.046256973	0.999885054	FALSE
2667	PF3D7_1453200.iso1.exon18.amp1_4450	-0.346517197	-0.264251165	0.476462168	0.082266032	0.046387752	0.999885054	FALSE
2788	PF3D7_1477000.3o3_5874	-0.193635921	-0.086031741	0.475479544	0.10760418	0.046795386	0.999885054	FALSE
1779	PF3D7_1145500.2o2_8228	-0.747921309	-0.817192258	0.474526686	-0.069270949	0.047193776	0.999885054	FALSE
585	PF3D7_0518700.e3s1_8039	-0.627291103	-0.557651858	0.473691368	0.069639246	0.047545554	0.999885054	FALSE
1813	PF3D7_1201300_8869	-0.358561745	-0.278510073	0.473374733	0.080051672	0.04767952	0.999885054	FALSE
2538	PF3D7_1432300.2o3_7662	-0.866780725	-0.781229862	0.472977672	0.085550863	0.047847997	0.999885054	FALSE
887	PF3D7_0715800.1o1_6729	-0.421912606	-0.21173595	0.472755551	0.210176656	0.047942481	0.999885054	FALSE
2313	PF3D7_1352700.iso1.exon1.amp1_2553	-0.626104746	-0.742810703	0.471601927	-0.116705958	0.048435927	0.999885054	FALSE
201	PF3D7_0222900.1o1_4649	-0.126970674	-0.027203936	0.471266971	0.099766738	0.04858006	0.999885054	FALSE
2579	PF3D7_1438800.4o4_9081	-0.71367209	-0.45327082	0.470755939	0.26040127	0.048800709	0.999885054	FALSE
1409	PF3D7_1014000.iso1.exon6.amp1_1249	-0.233510526	-0.303659476	0.470547159	-0.07014895	0.048891115	0.999885054	FALSE
2439	PF3D7_1408000.e1s1_6897	-0.17824039	-0.100533908	0.470010194	0.077706483	0.049124329	0.999885054	FALSE
1190	PF3D7_0904900.e1s1_8018	-0.491773043	-0.410875088	0.467757053	0.080897956	0.050113939	0.999885054	FALSE
2372	PF3D7_1365200.iso1.exon1.amp1_3794	-0.34944265	-0.431433345	0.465646638	-0.081990694	0.05105719	0.999885054	FALSE
386	PF3D7_0407000.1o1_5004	-0.771185929	-0.683841525	0.463549391	0.087344404	0.052010428	0.999885054	FALSE
1071	PF3D7_0813700.iso1.exon1.amp2_2781	-0.872269177	-0.812467542	0.462679495	0.059801635	0.052410507	0.999885054	FALSE
441	PF3D7_0419400.3o4_9115	-0.621037031	-0.514889511	0.461956616	0.10614752	0.052745082	0.999885054	FALSE
2436	PF3D7_1407300.iso1.exon1.amp1_2709	-0.386178187	-0.29799596	0.460639456	0.088182227	0.053359671	0.999885054	FALSE
1571	PF3D7_1102400.1o1_6766	-0.51556416	-0.439052346	0.459872493	0.076511814	0.053720505	0.999885054	FALSE
319	PF3D7_0319700.e1s1_5124	-0.226647829	-0.105763127	0.45866218	0.120884702	0.054294399	0.999885054	FALSE
240	PF3D7_0303800.1o1_7036	-0.538729239	-0.466210355	0.457379549	0.072518884	0.054908605	0.999885054	FALSE
550	PF3D7_0511100.iso1.exon2.amp1_1537	-0.358830129	-0.414100329	0.456889407	-0.0552702	0.055144965	0.999885054	FALSE
1096	PF3D7_0821600.1o1_4738	-0.508109769	-0.446088972	0.455811599	0.062020797	0.055667935	0.999885054	FALSE
1821	PF3D7_1202600.e1_8857	-0.28532837	-0.19304856	0.454370692	0.09227981	0.056374055	0.999885054	FALSE
2697	PF3D7_1458600.iso1.exon1.amp1_1707	-0.504495672	-0.447797234	0.453423491	0.056698438	0.056842608	0.999885054	FALSE
1022	PF3D7_0805100.iso1.exon1.amp1_3626	-0.415370849	-0.478227777	0.453082503	-0.062856928	0.05701214	0.999885054	FALSE
1849	PF3D7_1209500.iso2.exon2.amp1_3320	-0.409254339	-0.331222159	0.453056555	0.078032181	0.05702506	0.999885054	FALSE
1825	PF3D7_1205100.iso1.exon1.amp1_152	-0.488529776	-0.550791771	0.452778278	-0.062261995	0.057163777	0.999885054	FALSE
1484	PF3D7_1027400.iso1.exon1.amp1_87	-0.271399643	-0.33684197	0.450424687	-0.065442327	0.058349187	0.999885054	FALSE
912	PF3D7_0719500.2o2_9047	-0.640783691	-0.569997604	0.449271749	0.070786087	0.058937884	0.999885054	FALSE
2609	PF3D7_1442800.1o1_6738	-0.412958767	-0.255331022	0.448866198	0.157627744	0.059146223	0.999885054	FALSE
304	PF3D7_0317500.iso1.exon1.amp1_3396	-0.055847165	0.062592371	0.448622814	0.118439535	0.059271571	0.999885054	FALSE
2433	PF3D7_1406500.iso1.exon2.amp1_1090	0.191214806	0.320522582	0.447885204	0.129307776	0.05965291	0.999885054	FALSE
2246	PF3D7_1335600.e2_4813	-0.233826172	-0.167835071	0.44729255	0.065991101	0.059960898	0.999885054	FALSE
130	PF3D7_0207100.s1_9173	-0.449783006	-0.377086573	0.446412133	0.072696432	0.060421059	0.999885054	FALSE
1522	PF3D7_1036500.1o1_6762	0.367116651	0.463800185	0.445583014	0.096683534	0.060857296	0.999885054	FALSE
1139	PF3D7_0831100.iso1.exon2.amp1_4116	-0.063521748	0.1614501	0.445119991	0.224971848	0.061102137	0.999885054	FALSE
608	PF3D7_0523400.3o3_6752	-0.606696167	-0.518729143	0.444598721	0.087967024	0.061378833	0.999885054	FALSE
1437	PF3D7_1017800.iso1.exon3.amp2_1970	-0.598220748	-0.543732192	0.443733647	0.054488556	0.061840497	0.999885054	FALSE
2755	PF3D7_1470200.2o3_6102	-0.113884164	-0.272311097	0.442870459	-0.158426932	0.062304244	0.999885054	FALSE
741	PF3D7_0622000.iso1.exon3.amp1_2970	0.283141708	0.348250622	0.442770185	0.065108914	0.062358317	0.999885054	FALSE
1857	PF3D7_1211600.iso1.exon1.amp2_2832	-0.433062844	-0.349873225	0.441790841	0.083189619	0.062888639	0.999885054	FALSE
1134	PF3D7_0830600.2o2_6153	-0.19077448	-0.288756891	0.441732706	-0.097982411	0.062920246	0.999885054	FALSE
325	PF3D7_0320800.e2s1_4867	-0.454712877	-0.356826659	0.441444907	0.097886218	0.063076925	0.999885054	FALSE
2213	PF3D7_1329500.iso1.exon1.amp2_3671	-0.295575943	-0.517003305	0.441254731	-0.221427362	0.063180649	0.999885054	FALSE
1654	PF3D7_1121800.s1_7974	1.913075999	2.084834038	0.441164734	0.171758039	0.063229787	0.999885054	FALSE
810	PF3D7_0701900.e2s1_9111	-0.138096506	-0.060804067	0.439469289	0.077292439	0.064161891	0.999885054	FALSE
2321	PF3D7_1353700.1o1_5245	1.572241024	1.712204104	0.438513297	0.139963081	0.06469285	0.999885054	FALSE
2320	PF3D7_1353300.iso1.exon1.amp3_4512	0.526502568	0.674259807	0.438284524	0.147757239	0.064820491	0.999885054	FALSE
2172	PF3D7_1321500.1.8o9_7677	-0.551478439	-0.508202059	0.436191586	0.04327638	0.065998663	0.999885054	FALSE
2656	PF3D7_1451500.1o1_7836	0.520876831	0.658405006	0.435912583	0.137528175	0.066157153	0.999885054	FALSE
2631	PF3D7_1446900.2o3_4704	-0.626543616	-0.544835173	0.435718826	0.081708443	0.066267417	0.999885054	FALSE
1496	PF3D7_1031500.iso1.exon1.amp1_1891	-0.672100477	-0.592929775	0.435035126	0.079170703	0.066657808	0.999885054	FALSE
479	PF3D7_0425900.iso1.exon2.amp1_4457	-0.410379749	-0.31065168	0.433836106	0.099728068	0.067347385	0.999885054	FALSE
666	PF3D7_0602600.iso1.exon4.amp1_377	-0.353904979	-0.398018145	0.433604145	-0.044113166	0.067481519	0.999885054	FALSE
2181	PF3D7_1322200.iso1.exon8.amp1_3835	-0.519642215	-0.458858654	0.43351845	0.060783561	0.067531134	0.999885054	FALSE
2739	PF3D7_1468000.e11_7975	-0.709728974	-0.615321648	0.433231916	0.094407326	0.067697262	0.999885054	FALSE
74	PF3D7_0113800.3o4_7092	-0.432680456	-0.349487963	0.431871429	0.083192494	0.068491014	0.999885054	FALSE
2156	PF3D7_1317800.e2_6821	-0.615933396	-0.568393037	0.429225159	0.047540359	0.070058624	0.999885054	FALSE
271	PF3D7_0310800.1o1_6383	-0.874882436	-0.915835867	0.428851812	-0.040953431	0.07028233	0.999885054	FALSE
2756	PF3D7_1470500.5o6_7066	-0.592657912	-0.469959432	0.428113255	0.12269848	0.070726732	0.999885054	FALSE
157	PF3D7_0211300.iso1.exon2.amp1_77	-0.38849401	-0.302736896	0.426262499	0.085757114	0.07185131	0.999885054	FALSE
1928	PF3D7_1228600.e1s1_5187	-0.073210947	0.012104412	0.426025454	0.085315358	0.071996483	0.999885054	FALSE
617	PF3D7_0524700_8580	-1.000513815	-1.053456684	0.42481638	-0.052942869	0.072740997	0.999885054	FALSE
973	PF3D7_0731500.s1 (renamed)_7684	-0.565483445	-0.44941379	0.42456037	0.116069656	0.072899511	0.999885054	FALSE
831	PF3D7_0705000.e1s1_7991	-0.030690705	0.048389816	0.423245056	0.079080521	0.073718737	0.999885054	FALSE
2719	PF3D7_1465000.1o1_4675	-0.505782413	-0.416651129	0.422225971	0.089131284	0.074359039	0.999885054	FALSE
293	PF3D7_0315200.iso1.exon1.amp3_2789	-0.237166439	-0.14913069	0.419752934	0.088035749	0.075933317	0.999885054	FALSE
1704	PF3D7_1129800.1o1_9026	-0.019401825	0.229324254	0.419373007	0.24872608	0.076177754	0.999885054	FALSE
1738	PF3D7_1136700.iso1.exon7.amp1_117	-0.320078925	-0.383968366	0.418407866	-0.06388944	0.076801826	0.999885054	FALSE
182	PF3D7_0218300.2o4_6804	-0.713301914	-0.681925288	0.418332795	0.031376626	0.076850557	0.999885054	FALSE
2040	PF3D7_1252400.e4s2_9227	-0.713088048	-0.619783239	0.416973012	0.093304809	0.077737939	0.999885054	FALSE
2038	PF3D7_1252400.e3s1_6303	-0.586990669	-0.544164824	0.414728066	0.042825844	0.079222697	0.999885054	FALSE
1689	PF3D7_1127400.iso1.exon1.amp1_2346	-1.055665127	-1.004754877	0.412850551	0.050910251	0.080483511	0.999885054	FALSE
2362	PF3D7_1362500.iso1.exon2.amp1_2159	-0.613355027	-0.545642475	0.412526592	0.067712552	0.080702832	0.999885054	FALSE
168	PF3D7_0213500.iso1.exon3.amp1_4447	-0.514800872	-0.423408706	0.41136607	0.091392166	0.081492815	0.999885054	FALSE
1413	PF3D7_1014300.e1s3_6628	-0.510717672	-0.455585442	0.410234323	0.05513223	0.082269729	0.999885054	FALSE
1376	PF3D7_1008200.iso1.exon1.amp1_2743	-0.5538068	-0.438881563	0.409299871	0.114925238	0.082916085	0.999885054	FALSE
2102	PF3D7_1305900.iso1.exon2.amp1_399	-0.356299143	-0.415330407	0.409175191	-0.059031264	0.083002661	0.999885054	FALSE
2578	PF3D7_1438400.3o7_4773	0.420973963	0.540125161	0.407954127	0.119151197	0.083854737	0.999885054	FALSE
65	PF3D7_0112000.3o4_5862	0.613620638	0.745054497	0.40754765	0.131433859	0.084140075	0.999885054	FALSE
1964	PF3D7_1234800.e1s2_8941	0.207673091	0.364149167	0.407417845	0.156476076	0.084231374	0.999885054	FALSE
1314	PF3D7_0933100.4o4_8227	-0.358555758	-0.438560802	0.405958833	-0.080005044	0.085263544	0.999885054	FALSE
751	PF3D7_0624500.iso1.exon1.amp1_1536	-0.404769858	-0.457506353	0.404972629	-0.052736495	0.085967468	0.999885054	FALSE
292	PF3D7_0315100.e1s1_7183	-0.74426961	-0.664024601	0.403525961	0.080245009	0.087009232	0.999885054	FALSE
1357	PF3D7_1003600.e1s1_8919	-0.47493191	-0.393932884	0.403400079	0.080999027	0.0871004	0.999885054	FALSE
1913	PF3D7_1224500.2o2_4969	0.471920435	0.554881032	0.399474981	0.082960597	0.089985134	0.999885054	FALSE
171	PF3D7_0214300.iso1.exon1.amp1_2559	0.061450312	0.137762183	0.399354331	0.076311871	0.090075106	0.999885054	FALSE
1986	PF3D7_1239600.1o1_9028	-0.483513209	-0.38157559	0.399018862	0.101937619	0.090325686	0.999885054	FALSE
1326	PF3D7_0936300.2o2_8152	1.318106079	1.390329554	0.398591975	0.072223475	0.090645427	0.999885054	FALSE
532	PF3D7_0508500.s3_4828	-0.511354831	-0.426387171	0.397645961	0.08496766	0.091357501	0.999885054	FALSE
795	PF3D7_0632500.iso1.exon1.amp1_3326	0.792211472	0.894914064	0.396104706	0.102702592	0.092528021	0.999885054	FALSE
2065	PF3D7_1300300.e1s1_5659	-0.453346803	-0.367004009	0.395053069	0.086342793	0.093334141	0.999885054	FALSE
1605	PF3D7_1111000.1o1_6758	-0.347898045	-0.299687942	0.394931358	0.048210102	0.093427829	0.999885054	FALSE
2122	PF3D7_1310500.iso1.exon1.amp1_2712	-0.599220553	-0.535375739	0.394843204	0.063844815	0.093495737	0.999885054	FALSE
2338	PF3D7_1357800.e3s1_7470	-0.163927828	-0.071585585	0.394774833	0.092342244	0.093548435	0.999885054	FALSE
880	PF3D7_0713900.e1s3_8249	-0.04266482	0.061367439	0.394319018	0.104032259	0.09390042	0.999885054	FALSE
1398	PF3D7_1012500.e1s1_9230	-0.671754351	-0.579371704	0.393388236	0.092382647	0.094622742	0.999885054	FALSE
1525	PF3D7_1036900.e1s2_5948	0.557748594	0.656882525	0.391629925	0.099133931	0.096000387	0.999885054	FALSE
1316	PF3D7_0933600.e1s1_8054	-0.600435617	-0.52672896	0.390973806	0.073706658	0.096518883	0.999885054	FALSE
1921	PF3D7_1227200.iso1.exon1.amp2_815	-0.222230138	-0.080288144	0.390943331	0.141941993	0.096543024	0.999885054	FALSE
177	PF3D7_0216900.1o1_7051	-0.356081715	-0.247794759	0.390012552	0.108286956	0.09728288	0.999885054	FALSE
449	PF3D7_0420300.iso1.exon1.amp3_1099	-0.559333378	-0.457488526	0.389096056	0.101844852	0.09801616	0.999885054	FALSE
1732	PF3D7_1136100.1o1_5019	-0.367690253	-0.213054519	0.388738303	0.154635734	0.098303686	0.999885054	FALSE
2295	PF3D7_1348400.iso1.exon3.amp1_3375	-0.190167161	-0.061181157	0.388710217	0.128986005	0.09832629	0.999885054	FALSE
1549	PF3D7_1040900.iso1.exon2.amp1_2143	0.131062164	0.197386248	0.387698772	0.066324084	0.099143289	0.999885054	FALSE
1992	PF3D7_1240400.iso1.exon2.amp1_1013	1.476072076	1.601659198	0.387630457	0.125587122	0.099198681	0.999885054	FALSE
421	PF3D7_0415000.1o1_7877	-0.48942562	-0.426296536	0.387025161	0.063129084	0.099690642	0.999885054	FALSE
1976	PF3D7_1237300.iso1.exon3.amp1_116	-0.414130466	-0.471084299	0.38586856	-0.056953834	0.100636528	0.999885054	FALSE
235	PF3D7_0302800.e1s1_6041	0.083537841	0.195746863	0.385659665	0.112209021	0.100808187	0.999885054	FALSE
2545	PF3D7_1433100.iso1.exon4.amp1_1798	-0.388843393	-0.424674356	0.385471712	-0.035830962	0.100962851	0.999885054	FALSE
518	PF3D7_0505200.e1s1_6332	-0.795371443	-0.722529923	0.384607422	0.07284152	0.101676699	0.999885054	FALSE
216	PF3D7_0301100.2o2_9008	-0.393266504	-0.311355128	0.383003984	0.081911376	0.103012532	0.999885054	FALSE
956	PF3D7_0728600.iso1.exon3.amp1_2396	0.144609901	0.453751327	0.38207462	0.309141427	0.103793671	0.999885054	FALSE
2627	PF3D7_1446500.iso1.exon1.amp3_1106	-0.684109008	-0.609605167	0.381759774	0.074503841	0.104059452	0.999885054	FALSE
2592	PF3D7_1440100.iso1.exon1.amp2_1067	-0.202187784	-0.135281579	0.381394097	0.066906205	0.104368875	0.999885054	FALSE
1092	PF3D7_0821000.1o5_7907	-0.197158655	-0.1314838	0.381285365	0.065674854	0.104461033	0.999885054	FALSE
1090	PF3D7_0819800.e4s1_8607	-0.173080072	-0.290998255	0.381264014	-0.117918183	0.104479137	0.999885054	FALSE
1665	PF3D7_1123200.iso1.exon1.amp1_3335	0.676572113	0.75303539	0.380711297	0.076463277	0.10494875	0.999885054	FALSE
35	PF3D7_0105900.iso1.exon1.amp1_short_2005	-0.536104038	-0.463277355	0.380637422	0.072826684	0.105011654	0.999885054	FALSE
1393	PF3D7_1012000.iso1.exon1.amp1_2737	-0.645583179	-0.598961478	0.380561388	0.046621701	0.105076431	0.999885054	FALSE
2701	PF3D7_1459600.iso1.exon2.amp1_2130	-0.262747538	-0.21400104	0.380274086	0.048746498	0.105321505	0.999885054	FALSE
2779	PF3D7_1475700.1o1_5011	-0.72825512	-0.596134062	0.379882939	0.132121057	0.105655947	0.999885054	FALSE
670	PF3D7_0603800.16o20_7091	-0.234672421	-0.134550368	0.378343945	0.100122053	0.106980681	0.999885054	FALSE
276	PF3D7_0311400.iso1.exon2.amp2_1071	0.266864764	0.401272796	0.378337083	0.134408033	0.106986619	0.999885054	FALSE
1924	PF3D7_1228100.iso1.exon2.amp1_2994	0.045091918	0.212063819	0.377921186	0.166971901	0.107347061	0.999885054	FALSE
1747	PF3D7_1138000.iso1.exon1.amp3_4227	-0.186144022	-0.1284896	0.37644686	0.057654422	0.108633186	0.999885054	FALSE
2308	PF3D7_1352100.iso1.exon1.amp2_3090	-0.463549462	-0.366390676	0.376239182	0.097158786	0.108815407	0.999885054	FALSE
1916	PF3D7_1226100.1o1_4971	-0.447509292	-0.351569052	0.375903346	0.09594024	0.109110629	0.999885054	FALSE
2060	PF3D7_1255200.iso1.exon1.amp1_3324	0.724262516	0.828029406	0.375752765	0.10376689	0.109243222	0.999885054	FALSE
1498	PF3D7_1031800.iso1.exon1.amp1_698	-0.344453955	-0.305336681	0.375512328	0.039117274	0.109455223	0.999885054	FALSE
1025	PF3D7_0805700.iso1.exon1.amp2_3399	-0.549877509	-0.497100406	0.375057803	0.052777103	0.10985695	0.999885054	FALSE
2110	PF3D7_1308200.e2s1_7796	-0.026818866	0.030966173	0.374864215	0.057785039	0.110028432	0.999885054	FALSE
2525	PF3D7_1428300.e2_9131	-0.467257786	-0.408301771	0.374350766	0.058956015	0.110484358	0.999885054	FALSE
124	PF3D7_0206900.1.1o2_4674	0.084984168	0.395167017	0.374006727	0.310182848	0.110790754	0.999885054	FALSE
1869	PF3D7_1214000.iso1.exon2.amp1_2096	-0.308215307	-0.25870393	0.373075178	0.049511377	0.111624017	0.999885054	FALSE
625	PF3D7_0526600.iso1.exon1.amp4_3706	2.297335219	2.371594813	0.372977677	0.074259594	0.11171154	0.999885054	FALSE
1364	PF3D7_1005500.e2s1_9236	-0.212210209	-0.144670903	0.371897014	0.067539307	0.112685519	0.999885054	FALSE
2693	PF3D7_1458000.1o1_6763	-0.320975479	-0.247763531	0.371181772	0.073211949	0.113334121	0.999885054	FALSE
1481	PF3D7_1026500.iso1.exon1.amp1_1214	-0.476600774	-0.544118295	0.368993865	-0.067517521	0.115337925	0.999885054	FALSE
1686	PF3D7_1126500.iso1.exon1.amp1_2267	-0.489392888	-0.430492006	0.368915083	0.058900882	0.115410636	0.999885054	FALSE
1932	PF3D7_1229300.1o1_8528	-0.352757152	-0.220913408	0.368853012	0.131843744	0.115467951	0.999885054	FALSE
1133	PF3D7_0829600.1o1_8708	-0.654037251	-0.702213286	0.367423842	-0.048176035	0.116794315	0.999885054	FALSE
1517	PF3D7_1035900.1o1_5890	1.988909017	2.226928759	0.367392741	0.238019742	0.116823321	0.999885054	FALSE
2659	PF3D7_1452000.s1_6816	0.801757091	0.882989127	0.367372875	0.081232036	0.116841853	0.999885054	FALSE
2479	PF3D7_1416600.e1s1_6050	-0.968029035	-0.878910105	0.367291963	0.089118931	0.116917356	0.999885054	FALSE
1581	PF3D7_1104000.1o3_6466	-0.6441393	-0.681530508	0.367187518	-0.037391208	0.11701488	0.999885054	FALSE
1842	PF3D7_1208100.e2s1_5771	-0.664829138	-0.614346861	0.367084527	0.050482277	0.117111113	0.999885054	FALSE
519	PF3D7_0505400.1o1_4753	-0.540466667	-0.455495889	0.366693036	0.084970778	0.11747753	0.999885054	FALSE
352	PF3D7_0401200.iso1.exon2.amp1_2164	0.247225697	0.318119471	0.365503234	0.070893774	0.118597098	0.999885054	FALSE
2544	PF3D7_1433100.iso1.exon2.amp1_450	-0.748496076	-0.653769348	0.364800423	0.094726728	0.119262658	0.999885054	FALSE
944	PF3D7_0726400.e6s2_4899	0.512551252	0.64928415	0.364464749	0.136732898	0.119581654	0.999885054	FALSE
1973	PF3D7_1236200.iso1.exon1.amp2_4226	-0.174235671	-0.056595441	0.364237335	0.11764023	0.119798179	0.999885054	FALSE
2147	PF3D7_1315700.1o1_5549	-0.62682258	-0.568690945	0.364040316	0.058131636	0.119986032	0.999885054	FALSE
508	PF3D7_0504200.2o3_7328	-0.589442264	-0.513643382	0.362098875	0.075798882	0.12185051	0.999885054	FALSE
2162	PF3D7_1319600.iso1.exon1.amp2_1912	-0.401689663	-0.323699355	0.361364461	0.077990307	0.122562162	0.999885054	FALSE
1170	PF3D7_0901500.iso1.exon2.amp1_4476	0.421507447	0.495454194	0.3611129	0.073946747	0.122806731	0.999885054	FALSE
632	PF3D7_0528500.iso1.exon5.amp1_2948	-0.459583698	-0.498523806	0.360730011	-0.038940107	0.123179768	0.999885054	FALSE
1523	PF3D7_1036600.iso1.exon3.amp1_3273	-0.939203286	-0.865537598	0.359288757	0.073665687	0.124592518	0.999885054	FALSE
126	PF3D7_0206900.1.e1_8561	-0.399972498	-0.159247673	0.359167654	0.240724825	0.124711844	0.999885054	FALSE
2451	PF3D7_1409000.1o2_7919	-0.490263008	-0.420106616	0.358151689	0.070156392	0.125716707	0.999885054	FALSE
2196	PF3D7_1326700.iso1.exon1.amp1_1024	-0.423712978	-0.352186586	0.35693138	0.071526393	0.126932678	0.999885054	FALSE
1773	PF3D7_1144200.iso1.exon2.amp1_2141	-0.573829933	-0.490674471	0.356762238	0.083155461	0.127101997	0.999885054	FALSE
2104	PF3D7_1306300.iso1.exon3.amp1_52	-0.160333102	-0.017991839	0.355128785	0.142341263	0.128746942	0.999885054	FALSE
926	PF3D7_0723500_4823	-0.769854436	-0.675544952	0.355115425	0.094309484	0.128760469	0.999885054	FALSE
2662	PF3D7_1452600.iso1.exon1.amp2_3109	-0.484238548	-0.430755389	0.354934342	0.053483159	0.128943938	0.999885054	FALSE
2540	PF3D7_1432400.iso1.exon7.amp1_3249	-0.149905534	-0.090773212	0.353566192	0.059132322	0.130337214	0.999885054	FALSE
2316	PF3D7_1353000.3o3_6498	-0.453453614	-0.493937762	0.353257607	-0.040484148	0.130653204	0.999885054	FALSE
624	PF3D7_0526200.iso2.exon7.amp1_2452	0.551399334	0.66522776	0.35297756	0.113828426	0.130940527	0.999885054	FALSE
844	PF3D7_0708000.e2s1_8905	-0.584174141	-0.528661132	0.352903132	0.055513009	0.131016977	0.999885054	FALSE
2275	PF3D7_1345100.iso1.exon4.amp1_2363	-0.351078173	-0.308699692	0.352812972	0.04237848	0.131109638	0.999885054	FALSE
433	PF3D7_0417400.iso1.exon1.amp6_seg1_1730	-0.344002614	-0.272440521	0.35264639	0.071562093	0.131280984	0.999885054	FALSE
2749	PF3D7_1469600.e1s2_5417	0.102357978	0.183386457	0.352508762	0.081028479	0.13142269	0.999885054	FALSE
739	PF3D7_0621900.1o1_7648	-0.531721243	-0.469274686	0.351537056	0.062446556	0.132426831	0.999885054	FALSE
1879	PF3D7_1218200.e1s2_6823	-0.646622406	-0.591187202	0.35096403	0.055435204	0.133021987	0.999885054	FALSE
1626	PF3D7_1115300.e1s1_7187	-0.153748685	0.005943274	0.350840556	0.159691959	0.133150523	0.999885054	FALSE
2285	PF3D7_1347000.iso1.exon1.amp1_3538	0.377367082	0.268455864	0.349765051	-0.108911218	0.134274508	0.999885054	FALSE
763	PF3D7_0626900.1o1_4986	0.608701345	0.711237159	0.348640712	0.102535815	0.13545799	0.999885054	FALSE
2706	PF3D7_1461900.e1s1_8644	-0.511698168	-0.437734099	0.347412545	0.073964069	0.136760695	0.999885054	FALSE
902	PF3D7_0718300.e7s1_4783	0.020330704	0.112290002	0.347079036	0.091959298	0.137116242	0.999885054	FALSE
1856	PF3D7_1211300.e2s1_4865	-0.620327451	-0.578558088	0.346916333	0.041769363	0.137289976	0.999885054	FALSE
699	PF3D7_0610200.1o1_5636	-0.606320678	-0.538382967	0.346861464	0.067937711	0.137348606	0.999885054	FALSE
1467	PF3D7_1021900.e1s3_6056	0.005344829	0.20609021	0.346491767	0.200745381	0.137744189	0.999885054	FALSE
2070	PF3D7_1300500.iso1.exon2.amp1_995	0.11587426	0.197393454	0.346421439	0.081519194	0.137819549	0.999885054	FALSE
2072	PF3D7_1300700.iso1.exon1.amp1_2725	-0.11021474	-0.024665544	0.345424386	0.085549196	0.138891635	0.999885054	FALSE
1061	PF3D7_0810800.e2s1_9231	-0.144445416	-0.044694128	0.345151186	0.099751289	0.139186603	0.999885054	FALSE
1424	PF3D7_1015900.e2s1_5752	0.150936502	0.24035248	0.344994128	0.089415979	0.13935641	0.999885054	FALSE
488	PF3D7_0501000.e1s1_4842	-0.509367273	-0.455526795	0.344896166	0.053840478	0.139462412	0.999885054	FALSE
1088	PF3D7_0818900_4784	0.488996049	0.603921285	0.344877355	0.114925237	0.139482774	0.999885054	FALSE
2345	PF3D7_1359000.iso1.exon1.amp2_seg2_1178	-0.297772495	-0.225962577	0.344474006	0.071809919	0.139919985	0.999885054	FALSE
2013	PF3D7_1246200_8287	-0.28004631	-0.209059177	0.344366101	0.070987133	0.140037141	0.999885054	FALSE
1091	PF3D7_0820600.3o3_6147	-0.577440668	-0.639949111	0.344025211	-0.062508443	0.140407795	0.999885054	FALSE
577	PF3D7_0516800.iso1.exon1.amp3_1048	-0.404582034	-0.350474211	0.343940346	0.054107824	0.140500196	0.999885054	FALSE
554	PF3D7_0511500.s1_7710	-0.754317788	-0.686074128	0.343179513	0.068243659	0.141330851	0.999885054	FALSE
1975	PF3D7_1236500.1o1_7853	-0.306553776	0.010869327	0.342498244	0.317423103	0.142078095	0.999885054	FALSE
2343	PF3D7_1358600.iso1.exon1.amp2_2507	-0.609879607	-0.533485644	0.342223543	0.076393964	0.142380324	0.999885054	FALSE
998	PF3D7_0801000.e2s2_6911	0.506758946	0.559605215	0.341676067	0.05284627	0.142984255	0.999885054	FALSE
335	PF3D7_0324400.iso1.exon2.amp1_1578	0.206296232	0.268250878	0.341055132	0.061954645	0.143671787	0.999885054	FALSE
759	PF3D7_0626600.1o1_6969	-0.236794232	-0.159051756	0.340021477	0.077742476	0.144822377	0.999885054	FALSE
1627	PF3D7_1115400.e1s1_6025	0.322950041	0.541563722	0.33974144	0.218613681	0.145135403	0.999885054	FALSE
2228	PF3D7_1332200.e1s1_8060	-0.554684843	-0.505119793	0.339193444	0.04956505	0.145749575	0.999885054	FALSE
1576	PF3D7_1103100.e2s1_8572	-0.28356975	-0.347089495	0.339090866	-0.063519745	0.145864778	0.999885054	FALSE
1081	PF3D7_0816500.e2s1_4845	-0.483832748	-0.435010636	0.338507743	0.048822112	0.146521106	0.999885054	FALSE
1342	PF3D7_1000100.iso1.exon2.amp1_3908	1.677006469	1.767326593	0.338338435	0.090320124	0.146712126	0.999885054	FALSE
402	PF3D7_0410500.iso1.exon1.amp1_4441	-0.334959956	-0.293549722	0.338248574	0.041410234	0.146813593	0.999885054	FALSE
1546	PF3D7_1040500.iso1.exon2.amp1_2735	-0.069807344	0.060862584	0.338233357	0.130669929	0.146830781	0.999885054	FALSE
1008	PF3D7_0802600.iso1.exon6.amp1_2681	-0.285177336	-0.229345192	0.337925068	0.055832144	0.147179364	0.999885054	FALSE
1473	PF3D7_1023100.e1s4_6236	-0.443164189	-0.359200657	0.337779685	0.083963532	0.147343987	0.999885054	FALSE
2771	PF3D7_1473700.iso1.exon1.amp2_768	-0.472417178	-0.520427342	0.337733589	-0.048010165	0.147396214	0.999885054	FALSE
2672	PF3D7_1453800.e1s1_5125	-0.568783976	-0.515929637	0.337721618	0.052854339	0.14740978	0.999885054	FALSE
543	PF3D7_0509700.e4s1_9186	0.03101864	0.07636716	0.337216444	0.04534852	0.147983199	0.999885054	FALSE
239	PF3D7_0303700.e1s1_6024	0.17344767	0.374927887	0.336289043	0.201480216	0.149040677	0.999885054	FALSE
1109	PF3D7_0825200.iso1.exon4.amp1_4086	-0.507405643	-0.554846301	0.336287029	-0.047440658	0.149042979	0.999885054	FALSE
2496	PF3D7_1419400.e1s1_6636	-0.466841287	-0.550067792	0.336162916	-0.083226505	0.149184974	0.999885054	FALSE
1128	PF3D7_0828100.iso1.exon3.amp1_1012	-0.428394661	-0.358365039	0.336027981	0.070029622	0.149339476	0.999885054	FALSE
2193	PF3D7_1325900.e1s2_5691	-0.930132809	-0.876024684	0.335841174	0.054108125	0.149553589	0.999885054	FALSE
1483	PF3D7_1027000.iso1.exon1.amp2_seg1_3452	-0.854358259	-0.803812113	0.335233723	0.050546146	0.150251585	0.999885054	FALSE
308	PF3D7_0317800.1o1_7265	-0.805616128	-0.720197009	0.33511005	0.085419119	0.150394021	0.999885054	FALSE
221	PF3D7_0301700.e1s1_8026	-0.464306519	-0.396242867	0.334741649	0.068063652	0.150818971	0.999885054	FALSE
2440	PF3D7_1408200.iso1.exon1.amp2_2779	-1.025286115	-0.962616154	0.334570366	0.062669961	0.151016882	0.999885054	FALSE
434	PF3D7_0418000.6o10_5641	-0.215133664	-0.02482485	0.33448798	0.190308814	0.151112152	0.999885054	FALSE
1489	PF3D7_1029400.1o1_7611	-0.602518006	-0.522949028	0.333774675	0.079568978	0.151939078	0.999885054	FALSE
38	PF3D7_0107900.iso1.exon1.amp1_696	-0.686826685	-0.540005153	0.333400451	0.146821532	0.152374398	0.999885054	FALSE
29	PF3D7_0104100.1o2_5053	-0.778375414	-0.735913394	0.333248062	0.04246202	0.15255196	0.999885054	FALSE
2317	PF3D7_1353100.e1s1_6865	0.156711478	0.272349082	0.333186209	0.115637604	0.152624078	0.999885054	FALSE
149	PF3D7_0209800.e2_6830	-0.394714043	-0.290716219	0.332960443	0.103997824	0.152887552	0.999885054	FALSE
1117	PF3D7_0826100.s8_8594	-0.409340115	-0.544587276	0.332869924	-0.135247161	0.152993295	0.999885054	FALSE
2463	PF3D7_1411400.iso1.exon1.amp3_1922	-0.50310935	-0.445760239	0.332513577	0.057349111	0.153410158	0.999885054	FALSE
2593	PF3D7_1440200.6o6_8818	-0.952498416	-0.881144765	0.332204964	0.071353652	0.153771934	0.999885054	FALSE
1100	PF3D7_0823300.e1s2_7199	0.133841844	0.205025623	0.332110292	0.071183779	0.153883056	0.999885054	FALSE
1322	PF3D7_0935800.e9_9148	0.38539623	0.603066813	0.330418666	0.217670583	0.15587973	0.999885054	FALSE
2159	PF3D7_1318400.iso1.exon2.amp2_1669	-0.167841672	-0.115884146	0.33010861	0.051957526	0.156247993	0.999885054	FALSE
1375	PF3D7_1008100.s3_5986	-0.231024489	-0.150052577	0.33002544	0.080971912	0.156346896	0.999885054	FALSE
2531	PF3D7_1430100.1o5_9018	-0.713908427	-0.670322578	0.329534794	0.043585848	0.156931408	0.999885054	FALSE
688	PF3D7_0607700.iso1.exon1.amp2_seg1_2869	-0.616427701	-0.544574384	0.328595977	0.071853317	0.158054818	0.999885054	FALSE
579	PF3D7_0517700_5368	-0.397909004	-0.333094759	0.326963012	0.064814245	0.160024528	0.999885054	FALSE
1383	PF3D7_1009500.e3_5958	-0.524405879	-0.37752256	0.326640102	0.146883319	0.160416393	0.999885054	FALSE
1120	PF3D7_0826500.e1s1_5469	-0.471694439	-0.366770224	0.326551331	0.104924215	0.160524258	0.999885054	FALSE
133	PF3D7_0207300.iso1.exon5.amp1_1780	-0.42246753	-0.4518038	0.326444254	-0.029336269	0.160654444	0.999885054	FALSE
1089	PF3D7_0819600.2o2_6409	-0.726819471	-0.658151758	0.326375682	0.068667713	0.160737861	0.999885054	FALSE
1458	PF3D7_1021200.1o1_6485	0.61080299	0.508867171	0.326341356	-0.101935819	0.160779631	0.999885054	FALSE
684	PF3D7_0606700.iso1.exon1.amp1_3408	-0.413759482	-0.363880189	0.326339472	0.049879293	0.160781924	0.999885054	FALSE
1402	PF3D7_1013100.1o2_5076	-0.74574355	-0.664491546	0.325892091	0.081252004	0.161327145	0.999885054	FALSE
1352	PF3D7_1002100.2o2_7048	2.385574932	2.464204264	0.325768916	0.078629332	0.161477522	0.999885054	FALSE
2411	PF3D7_1402000.iso1.exon13.amp1_2628	-0.478567762	-0.448204243	0.325502949	0.030363519	0.161802615	0.999885054	FALSE
2448	PF3D7_1408700.e3s1_8075	1.516337975	1.58605483	0.32533848	0.069716855	0.162003915	0.999885054	FALSE
1362	PF3D7_1005000.1o1_7075	-0.312909223	-0.269088197	0.324834135	0.043821026	0.162622472	0.999885054	FALSE
2273	PF3D7_1344800.2o3_8166	-0.221905243	-0.141569326	0.324295239	0.080335917	0.163285529	0.999885054	FALSE
1199	PF3D7_0905900.iso1.exon1.amp1_3487	-0.309495056	-0.363843469	0.323769346	-0.054348413	0.163934708	0.999885054	FALSE
606	PF3D7_0522500.iso1.exon1.amp1_2655	-0.178715703	-0.130123192	0.323633417	0.048592511	0.164102844	0.999885054	FALSE
2513	PF3D7_1425500.2o2_7841	-0.524791249	-0.472325948	0.322881494	0.052465301	0.165035467	0.999885054	FALSE
2603	PF3D7_1441800.3o3_8132	-0.515375906	-0.591108574	0.322619602	-0.075732668	0.165361307	0.999885054	FALSE
1966	PF3D7_1235000.iso1.exon3.amp1_650	0.882236591	0.809111755	0.322280076	-0.073124837	0.165784515	0.999885054	FALSE
2611	PF3D7_1443000.iso1.exon1.amp2_seg1_4329	-0.386162748	-0.353076521	0.322268021	0.033086226	0.165799558	0.999885054	FALSE
1220	PF3D7_0909900.iso1.exon1.amp1_1689	-0.00867403	0.078755215	0.322150737	0.087429245	0.165945964	0.999885054	FALSE
744	PF3D7_0622800.s1 (renamed)_4799	0.417522057	0.562350587	0.3212272	0.14482853	0.167102489	0.999885054	FALSE
1411	PF3D7_1014100.s1_5371	0.553532407	0.637301684	0.321188661	0.083769276	0.167150893	0.999885054	FALSE
919	PF3D7_0721600.e2s1_4856	-0.390913386	-0.306781319	0.3207306	0.084132066	0.167727072	0.999885054	FALSE
2254	PF3D7_1337800.1o1_6468	-0.517307758	-0.561443012	0.320646987	-0.044135254	0.167832419	0.999885054	FALSE
1513	PF3D7_1035300.iso1.exon1.amp2_3364	-0.395341023	-0.334120883	0.319673618	0.06122014	0.16906276	0.999885054	FALSE
1687	PF3D7_1127000.e6s1_6000	-0.264815132	-0.160121673	0.319238951	0.104693459	0.169614535	0.999885054	FALSE
847	PF3D7_0709000.e3s1_5972	-0.659671049	-0.612718915	0.31899164	0.046952134	0.169929127	0.999885054	FALSE
1828	PF3D7_1205500.e1s2_5111	-0.474006563	-0.612517902	0.318462273	-0.138511339	0.170604098	0.999885054	FALSE
2583	PF3D7_1439100.e1s2_6064	-0.596708476	-0.48591831	0.318447735	0.110790166	0.170622666	0.999885054	FALSE
1628	PF3D7_1115600.e3s1_6879	-0.248602006	-0.208591333	0.318300072	0.040010674	0.170811346	0.999885054	FALSE
288	PF3D7_0313400.iso1.exon1.amp1_445	-0.428302463	-0.314142906	0.31822478	0.114159556	0.170907618	0.999885054	FALSE
1874	PF3D7_1216300.iso1.exon1.amp1_2121	-0.462732151	-0.400475629	0.317817882	0.062256522	0.171428656	0.999885054	FALSE
2624	PF3D7_1445900.e2s1_7753	-0.785909252	-0.753979945	0.316392839	0.031929308	0.173263575	0.999885054	FALSE
2146	PF3D7_1315400.4o5_5282	-0.569647867	-0.493644773	0.31587475	0.076003094	0.173934596	0.999885054	FALSE
1751	PF3D7_1138400.e1s4_8575	0.587881389	0.749288864	0.315352036	0.161407475	0.174613732	0.999885054	FALSE
909	PF3D7_0719200.e9s1_8565	-0.030934011	-0.10403199	0.31531541	-0.073097979	0.174661399	0.999885054	FALSE
1482	PF3D7_1026900.1o1_7582	-0.916916017	-0.86622175	0.314648419	0.050694267	0.175531281	0.999885054	FALSE
2282	PF3D7_1346400.e1s6_8876	-0.514837834	-0.4592925	0.312864996	0.055545334	0.177874351	0.999885054	FALSE
694	PF3D7_0609000.iso1.exon1.amp1_3985	-0.369212051	-0.288246858	0.312551243	0.080965193	0.178289153	0.999885054	FALSE
289	PF3D7_0313600.5o6_7614	-0.533996152	-0.475760376	0.312216421	0.058235776	0.178732666	0.999885054	FALSE
2115	PF3D7_1308900.iso1.exon1.amp1_3435	-0.663856273	-0.619876469	0.311745417	0.043979804	0.179358069	0.999885054	FALSE
125	PF3D7_0206900.1.2o2_5836	-0.664508196	-0.623466674	0.311434078	0.041041521	0.17977243	0.999885054	FALSE
1079	PF3D7_0816100.1o4_7264	-0.591916513	-0.535549889	0.311287184	0.056366624	0.179968199	0.999885054	FALSE
2565	PF3D7_1435900.1o1_6425	-0.518547543	-0.458646423	0.310807049	0.059901121	0.180609279	0.999885054	FALSE
1530	PF3D7_1037200.10o12_7895	-0.355815114	-0.315518389	0.310391997	0.040296725	0.181164934	0.999885054	FALSE
2552	PF3D7_1434500.e2s2_9165	-0.685581381	-0.608560748	0.310296593	0.077020634	0.18129285	0.999885054	FALSE
1997	PF3D7_1241400.iso1.exon1.amp2_seg2_276	-0.49638461	-0.444914838	0.310141403	0.051469772	0.181501083	0.999885054	FALSE
1601	PF3D7_1110200.e1s2_6629	-0.372185234	-0.274528778	0.30948634	0.097656456	0.182382151	0.999885054	FALSE
253	PF3D7_0307700.e3s2_7088	-0.043565835	0.03829666	0.309270909	0.081862494	0.182672657	0.999885054	FALSE
2287	PF3D7_1347300.iso1.exon2.amp1_2070	-0.739253949	-0.664389347	0.309223584	0.074864603	0.182736522	0.999885054	FALSE
1942	PF3D7_1231400.iso1.exon4.amp1_924	-0.220654205	-0.144012158	0.30867676	0.076642047	0.183475777	0.999885054	FALSE
224	PF3D7_0301900.1o1_7888	-0.14625698	-0.056231463	0.308609759	0.090025517	0.18356652	0.999885054	FALSE
2782	PF3D7_1476400.2o2_7585	-0.577627836	-0.607940066	0.308434281	-0.030312231	0.18380435	0.999885054	FALSE
478	PF3D7_0425800.iso1.exon2.amp1_4183	1.240336146	1.310582976	0.307309274	0.07024683	0.185334963	0.999885054	FALSE
154	PF3D7_0211100.iso1.exon1.amp1_3153	-0.261517867	-0.20454304	0.306879073	0.056974826	0.185922953	0.999885054	FALSE
1142	PF3D7_0831400.2o2_8450	-0.045477554	-0.096615977	0.30669286	-0.051138423	0.186177926	0.999885054	FALSE
2616	PF3D7_1444100.e7s1_6923	0.179584151	0.113825936	0.306529783	-0.065758215	0.186401451	0.999885054	FALSE
1351	PF3D7_1001900.2o2_7282	-0.096865744	-0.023564877	0.305948433	0.073300867	0.187200029	0.999885054	FALSE
2044	PF3D7_1252800.2o2_5593	-0.447840916	-0.356919071	0.305241568	0.090921845	0.188174695	0.999885054	FALSE
2699	PF3D7_1459100.1o1_7938	-0.60180075	-0.508433457	0.30510171	0.093367293	0.188368019	0.999885054	FALSE
1414	PF3D7_1014500.iso1.exon1.amp2_3369	-0.551934685	-0.500387386	0.305034081	0.051547298	0.188461558	0.999885054	FALSE
409	PF3D7_0412000.1o1_7937	-0.339701516	-0.261623293	0.304750562	0.078078224	0.188854101	0.999885054	FALSE
2455	PF3D7_1409800.e1s1_8633	-0.328689347	-0.360155228	0.304485347	-0.031465881	0.189221891	0.999885054	FALSE
88	PF3D7_0200500.iso1.exon1.amp1_3303	0.794985282	0.877311873	0.303997357	0.082326591	0.189900108	0.999885054	FALSE
990	PF3D7_0800200.e2s1_5745	1.673497161	1.754920482	0.303369677	0.081423321	0.190775309	0.999885054	FALSE
798	PF3D7_0632500.iso1.exon2.amp4_seg2_4605	-0.335422614	-0.277753797	0.303105315	0.057668817	0.191144879	0.999885054	FALSE
595	PF3D7_0520400.e1s1_6896	0.405724133	0.473058629	0.30300818	0.067334496	0.191280814	0.999885054	FALSE
1359	PF3D7_1004200.e2s2_6055	-1.127412639	-1.050260119	0.302418156	0.07715252	0.19210817	0.999885054	FALSE
1443	PF3D7_1019000.e1s1_6639	-0.027065663	0.014525584	0.302345128	0.041591247	0.192210771	0.999885054	FALSE
455	PF3D7_0421300.iso1.exon1.amp1_2739	0.912312505	0.988911013	0.301324075	0.076598508	0.193649856	0.999885054	FALSE
1013	PF3D7_0804000.iso1.exon1.amp1_4456	0.075975147	0.170781024	0.301115937	0.094805877	0.193944254	0.999885054	FALSE
898	PF3D7_0718000.e9s3_8251	-0.801360687	-0.748110049	0.300684283	0.053250638	0.194555933	0.999885054	FALSE
298	PF3D7_0317200.iso1.exon1.amp1_4590	-0.651056461	-0.585755846	0.300194559	0.065300615	0.19525175	0.999885054	FALSE
2493	PF3D7_1417800.e2s1_5369	-0.730321262	-0.577226814	0.299833919	0.153094448	0.195765421	0.999885054	FALSE
2171	PF3D7_1321500.1.6o9_7966	-0.739614582	-0.692535561	0.299731967	0.047079022	0.195910827	0.999885054	FALSE
2676	PF3D7_1454600.iso1.exon1.amp1_3575	-0.971704804	-1.149569555	0.299670378	-0.177864751	0.195998709	0.999885054	FALSE
957	PF3D7_0728700.iso1.exon3.amp1_1258	-0.467907685	-0.521263594	0.299323682	-0.05335591	0.196493993	0.999885054	FALSE
1290	PF3D7_0927900.1o1_4984	-0.695119209	-0.647457753	0.298678097	0.047661456	0.197418903	0.999885054	FALSE
2442	PF3D7_1408400.e1s2_4888	-0.428791782	-0.380273383	0.29852094	0.048518398	0.197644577	0.999885054	FALSE
385	PF3D7_0406900.4o8_8241	-0.276528528	-0.320785069	0.298320988	-0.04425654	0.197931999	0.999885054	FALSE
394	PF3D7_0408700.e6s1_5713	-0.604062454	-0.522392048	0.298306039	0.081670406	0.1979535	0.999885054	FALSE
1388	PF3D7_1011400.1o1_6697	-0.654954327	-0.595246204	0.297907044	0.059708124	0.198528074	0.999885054	FALSE
582	PF3D7_0518600.iso1.exon1.amp1_1407	-0.393335658	-0.174225187	0.297723853	0.219110471	0.198792319	0.999885054	FALSE
1834	PF3D7_1206900.4o4_7049	0.287923171	0.495093317	0.297587465	0.207170146	0.198989232	0.999885054	FALSE
569	PF3D7_0514600.iso1.exon2.amp1_2392	-0.465738272	-0.429321908	0.2974707	0.036416364	0.199157938	0.999885054	FALSE
1728	PF3D7_1134700.e2s1_6257	-0.232417901	-0.138282017	0.297179639	0.094135884	0.199578963	0.999885054	FALSE
173	PF3D7_0215700.e2s2_6920	0.202408967	0.316975249	0.296955409	0.114566282	0.199903793	0.999885054	FALSE
2674	PF3D7_1454200.s1_6239	-0.04711001	0.042166146	0.296851129	0.089276156	0.200055	0.999885054	FALSE
2025	PF3D7_1249800.e1s3_4827	-0.633274524	-0.582624889	0.296754427	0.050649635	0.2001953	0.999885054	FALSE
899	PF3D7_0718000.e9s4_5939	0.029184978	0.104812601	0.296703973	0.075627623	0.200268533	0.999885054	FALSE
1965	PF3D7_1235000.iso1.exon2.amp1_3863	-0.476696726	-0.559477283	0.296243466	-0.082780557	0.200937915	0.999885054	FALSE
2353	PF3D7_1360400.1o1_5832	-0.005623866	0.045507222	0.295900906	0.051131088	0.201436995	0.999885054	FALSE
1477	PF3D7_1024000.iso1.exon1.amp1_1314	-0.340794664	-0.286260447	0.295554389	0.054534217	0.201942834	0.999885054	FALSE
2109	PF3D7_1307400.1o2_7878	-0.269098796	-0.202035986	0.295463636	0.06706281	0.202075479	0.999885054	FALSE
383	PF3D7_0406700.iso1.exon9.amp1_3850	-0.39617226	-0.441344735	0.294832098	-0.045172475	0.203000434	0.999885054	FALSE
713	PF3D7_0616000.1o3_5009	-0.501536476	-0.471852525	0.294817185	0.029683952	0.203022317	0.999885054	FALSE
2031	PF3D7_1250800.e2s2_7441	-0.016927113	0.04263754	0.294816878	0.059564653	0.203022767	0.999885054	FALSE
872	PF3D7_0712800.iso1.exon1.amp1_3904	0.998875748	1.063744775	0.294643214	0.064869026	0.203277723	0.999885054	FALSE
856	PF3D7_0710200.iso1.exon1.amp2_seg1_3742	-0.496851541	-0.577267179	0.294634121	-0.080415638	0.203291079	0.999885054	FALSE
2161	PF3D7_1319600.iso1.exon1.amp1_1416	-0.378879961	-0.313980956	0.294282446	0.064899004	0.203808169	0.999885054	FALSE
2397	PF3D7_1373500.iso1.exon1.amp1_2457	1.499716871	1.587128813	0.294038142	0.087411942	0.204167992	0.999885054	FALSE
1629	PF3D7_1115700.e1s1_7476	-0.575460364	-0.516272442	0.293514962	0.059187923	0.204940239	0.999885054	FALSE
161	PF3D7_0212400.3o3_6803	-0.748854388	-0.650840421	0.293274486	0.098013966	0.205295966	0.999885054	FALSE
1436	PF3D7_1017800.iso1.exon3.amp1_1681	-0.180059262	-0.124024149	0.292269135	0.056035113	0.206788394	0.999885054	FALSE
2004	PF3D7_1243900.iso1.exon6.amp1_4142	-0.761397033	-0.634622626	0.291695327	0.126774406	0.207644008	0.999885054	FALSE
2426	PF3D7_1405500.1o1_7047	0.589982088	0.646344501	0.291562297	0.056362413	0.207842768	0.999885054	FALSE
2784	PF3D7_1476600.e2_4820	-0.081221134	-0.009733233	0.2912837	0.071487901	0.2082595	0.999885054	FALSE
13	PF3D7_0101100.iso1.exon1.amp1_3004	-0.659188495	-0.556349568	0.291265793	0.102838926	0.208286308	0.999885054	FALSE
1229	PF3D7_0911900.2o2_4716	1.645559191	1.584186051	0.291110288	-0.06137314	0.208519224	0.999885054	FALSE
169	PF3D7_0213900.iso1.exon1.amp2_1348	-0.600826828	-0.668247533	0.290957628	-0.067420705	0.208748077	0.999885054	FALSE
1556	PF3D7_1100100.iso1.exon1.amp1_4545	-0.524279544	-0.45082786	0.290266446	0.073451684	0.209786691	0.999885054	FALSE
700	PF3D7_0611800.iso1.exon5.amp1_seg1_1151	-0.447601133	-0.404597159	0.289950128	0.043003974	0.210263358	0.999885054	FALSE
2125	PF3D7_1311000 (renamed)_8744	0.759277441	0.82304071	0.289849153	0.063763269	0.210415697	0.999885054	FALSE
477	PF3D7_0425800.iso1.exon1.amp2_4244	-0.771165312	-0.725704451	0.289536817	0.045460861	0.210887459	0.999885054	FALSE
2227	PF3D7_1332000.iso1.exon4.amp1_2673	-0.30813993	-0.277682043	0.289296745	0.030457887	0.211250633	0.999885054	FALSE
1068	PF3D7_0812700.1o1_7561	0.43554389	0.496936719	0.288837697	0.061392828	0.211946429	0.999885054	FALSE
982	PF3D7_0732900.iso1.exon2.amp1_996	0.079669197	0.247497253	0.288750104	0.167828056	0.212079399	0.999885054	FALSE
2120	PF3D7_1309900.iso1.exon1.amp1_1551	-0.689035578	-0.740857814	0.288141244	-0.051822236	0.21300548	0.999885054	FALSE
1261	PF3D7_0919900.iso1.exon1.amp1_1105	-0.743803194	-0.946151215	0.287947487	-0.202348022	0.213300847	0.999885054	FALSE
1663	PF3D7_1122900.e2s5_7132	0.542285601	0.612307528	0.287682864	0.070021928	0.213704759	0.999885054	FALSE
1868	PF3D7_1213500.1o2_5618	-0.852986483	-0.78308208	0.287638861	0.069904403	0.213771981	0.999885054	FALSE
943	PF3D7_0726400.e6s1_8651	-0.926405372	-0.877275909	0.28706007	0.049129463	0.214657723	0.999885054	FALSE
2399	PF3D7_1400300.iso1.exon1.amp1_2146	0.684516968	0.782016384	0.286830425	0.097499415	0.215009948	0.999885054	FALSE
1219	PF3D7_0909700.iso1.exon1.amp1_1703	0.796539412	0.672162275	0.286194455	-0.124377137	0.215987732	0.999885054	FALSE
1440	PF3D7_1018100.1o1_6997	-0.52336579	-0.471068194	0.286162517	0.052297595	0.216036927	0.999885054	FALSE
365	PF3D7_0404100.iso1.exon1.amp1_2815	-0.816209289	-0.751585542	0.285866229	0.064623747	0.21649372	0.999885054	FALSE
1208	PF3D7_0907700.e1s1_8630	0.243789904	0.34910792	0.285729292	0.105318017	0.216705093	0.999885054	FALSE
693	PF3D7_0608500.2o2_7844	-0.552652649	-0.521016271	0.285702957	0.031636377	0.216745762	0.999885054	FALSE
1984	PF3D7_1239200.e1s2_7139	-0.848675148	-0.784387102	0.285465166	0.064288046	0.217113245	0.999885054	FALSE
1974	PF3D7_1236300.1o1_5000	-0.737654507	-0.673240063	0.284660914	0.064414444	0.218359726	0.999885054	FALSE
2010	PF3D7_1245900.1o1_7855	-0.421691362	-0.335565367	0.284522048	0.086125996	0.218575511	0.999885054	FALSE
660	PF3D7_0601700.2o2_6415	-0.505340317	-0.563934651	0.284230593	-0.058594335	0.219028943	0.999885054	FALSE
610	PF3D7_0524100.iso1.exon1.amp1_509	-0.208376652	-0.174913116	0.284010198	0.033463537	0.219372308	0.999885054	FALSE
1582	PF3D7_1104100.4o4_7289	-0.064660523	-0.139182514	0.283651805	-0.074521991	0.219931559	0.999885054	FALSE
723	PF3D7_0618900.iso2.exon2.amp1_2167	0.171920614	0.273074684	0.283269438	0.101154071	0.220529435	0.999885054	FALSE
1389	PF3D7_1011500.1o1_7558	-0.635147084	-0.582059976	0.283144246	0.053087109	0.220725462	0.999885054	FALSE
2186	PF3D7_1323600.e1s1_6902	-0.589418444	-0.533426659	0.283042007	0.055991785	0.220885648	0.999885054	FALSE
1680	PF3D7_1125800.1o4_6747	0.509073509	0.597978404	0.283005739	0.088904894	0.220942495	0.999885054	FALSE
299	PF3D7_0317200.iso1.exon1.amp2_3936	-0.548846796	-0.486778286	0.282491003	0.06206851	0.221750504	0.999885054	FALSE
2071	PF3D7_1300600.iso1.exon1.amp1_4179	0.42703213	0.493991934	0.282350435	0.066959804	0.22197156	0.999885054	FALSE
547	PF3D7_0510100.iso1.exon1.amp3_1915	-0.162598468	-0.236906577	0.281906507	-0.07430811	0.222670791	0.999885054	FALSE
2116	PF3D7_1308900.iso1.exon1.amp2_2793	-0.351396619	-0.277442331	0.281765699	0.073954288	0.222892934	0.999885054	FALSE
452	PF3D7_0420700.e2s1_8336	1.563228922	1.647878661	0.281745373	0.084649739	0.222925015	0.999885054	FALSE
2035	PF3D7_1252200.1o1_7010	0.593150504	0.737273253	0.281562005	0.144122749	0.22321459	0.999885054	FALSE
1445	PF3D7_1019300.iso1.exon1.amp2_1043	0.116719349	0.164510209	0.281123623	0.04779086	0.223908064	0.999885054	FALSE
556	PF3D7_0511500.s4_7427	-0.715116312	-0.578094322	0.280667417	0.13702199	0.224631497	0.999885054	FALSE
389	PF3D7_0407700.e2s2_6343	0.945271901	1.14074519	0.280418711	0.195473289	0.225026645	0.999885054	FALSE
960	PF3D7_0729700.iso1.exon2.amp1_1872	-0.257688952	-0.203324315	0.280252405	0.054364637	0.225291174	0.999885054	FALSE
71	PF3D7_0113300.2o2_5313	-1.059385803	-0.962087654	0.280182658	0.097298149	0.225402185	0.999885054	FALSE
1063	PF3D7_0811600.e2s1_6045	-0.571092485	-0.515982793	0.280120578	0.055109693	0.225501029	0.999885054	FALSE
2247	PF3D7_1335700.2o3_7090	-0.557190782	-0.511030337	0.279714243	0.046160445	0.226148826	0.999885054	FALSE
1653	PF3D7_1121700.e1s1_5657	-0.526499346	-0.445359978	0.279476694	0.081139368	0.2265282	0.999885054	FALSE
2112	PF3D7_1308400.e3s1_7195	-0.236573074	-0.183597924	0.279378274	0.05297515	0.226685525	0.999885054	FALSE
1634	PF3D7_1117200.iso1.exon2.amp1_1104	-0.41443056	-0.34786469	0.279052426	0.06656587	0.227206991	0.999885054	FALSE
2514	PF3D7_1425600.s2_4821	0.503801286	0.559109358	0.278980216	0.055308073	0.227322678	0.999885054	FALSE
1803	PF3D7_1200100.iso1.exon1.amp2_794	-0.035848547	0.022820803	0.278963939	0.05866935	0.22734876	0.999885054	FALSE
367	PF3D7_0404200.iso1.exon2.amp1_2698	-0.624257117	-0.571013199	0.278902724	0.053243918	0.227446874	0.999885054	FALSE
2477	PF3D7_1416200.iso1.exon1.amp3_seg1_4024	-0.354201079	-0.264219399	0.278884603	0.08998168	0.227475926	0.999885054	FALSE
1021	PF3D7_0804900.1o1_6159	-0.281576452	-0.338034792	0.27884371	-0.056458341	0.227541493	0.999885054	FALSE
628	PF3D7_0527600.6o10_4989	-0.289080152	-0.235857957	0.278209524	0.053222195	0.228560206	0.999885054	FALSE
2549	PF3D7_1433800.iso1.exon1.amp3_2788	-0.378881911	-0.251186603	0.278034658	0.127695308	0.228841715	0.999885054	FALSE
1435	PF3D7_1017300.1.2o2_6764	0.148025466	0.228439521	0.278002703	0.080414055	0.228893188	0.999885054	FALSE
1184	PF3D7_0903400.e1s3_8886	-0.301500023	-0.192082966	0.277935526	0.109417057	0.229001423	0.999885054	FALSE
2073	PF3D7_1300800.iso1.exon3.amp1_3282	-0.437482529	-0.369145847	0.277924289	0.068336682	0.22901953	0.999885054	FALSE
654	PF3D7_0600400.iso1.exon2.amp1_1895	-0.758631968	-0.71205123	0.277647902	0.046580739	0.229465285	0.999885054	FALSE
1615	PF3D7_1112400.1o1_4663	-0.377695063	-0.295823705	0.277578812	0.081871358	0.229576816	0.999885054	FALSE
2688	PF3D7_1456700_5651	-0.561154394	-0.499322678	0.276799618	0.061831716	0.230837549	0.999885054	FALSE
356	PF3D7_0401900.1o1_7666	0.71407099	0.786719386	0.276212499	0.072648396	0.231791012	0.999885054	FALSE
1240	PF3D7_0914800.1o1_6098	-0.826480933	-0.876365713	0.275791591	-0.04988478	0.23247641	0.999885054	FALSE
2370	PF3D7_1365000.iso1.exon1.amp1_1586	-0.592778244	-0.668490612	0.275781129	-0.075712368	0.232493466	0.999885054	FALSE
2435	PF3D7_1407000.e1s1_8654	-0.58959329	-0.523711145	0.275727264	0.065882145	0.232581297	0.999885054	FALSE
2018	PF3D7_1247400.e1s1_5156	-0.66583851	-0.604652929	0.275692314	0.061185581	0.232638298	0.999885054	FALSE
186	PF3D7_0219600.e1s1_8817	-0.048587667	0.035930323	0.275508483	0.08451799	0.232938292	0.999885054	FALSE
12	PF3D7_0101000.iso1.exon1.amp1_2157	-0.044036936	0.006553428	0.275265227	0.050590364	0.233335716	0.999885054	FALSE
2567	PF3D7_1436100.iso1.exon1.amp1_813	-1.048720196	-1.009731766	0.275016174	0.038988429	0.233743151	0.999885054	FALSE
1181	PF3D7_0903000_5973	-0.047053746	0.032378961	0.274871919	0.079432707	0.233979391	0.999885054	FALSE
597	PF3D7_0521300.iso1.exon3.amp1_2837	-0.659773046	-0.604485799	0.274713484	0.055287247	0.234239065	0.999885054	FALSE
1333	PF3D7_0937200.1o1_7291	-0.223153772	-0.119662868	0.274027714	0.103490903	0.235365578	0.999885054	FALSE
8	PF3D7_0100400.iso1.exon2.amp1_991	0.455775456	0.519659587	0.273924986	0.063884131	0.235534686	0.999885054	FALSE
2734	PF3D7_1466900.iso1.exon2.amp1_506	-0.310509147	-0.250911073	0.273382621	0.059598074	0.236429048	0.999885054	FALSE
2152	PF3D7_1317200.iso1.exon1.amp1_3709	0.669697215	0.562555193	0.273024909	-0.107142022	0.237020336	0.999885054	FALSE
868	PF3D7_0712300.iso1.exon1.amp1_3615	0.694737666	0.800667372	0.27299576	0.105929707	0.237068569	0.999885054	FALSE
2169	PF3D7_1321100.e4s1_8041	-0.463456676	-0.406218633	0.272830682	0.057238043	0.237341861	0.999885054	FALSE
14	PF3D7_0101300.iso1.exon2.amp1_4146	0.505319346	0.587934936	0.272558924	0.08261559	0.237792287	0.999885054	FALSE
2586	PF3D7_1439700.6o6_6716	-0.742820567	-0.649393396	0.272416169	0.093427171	0.238029159	0.999885054	FALSE
396	PF3D7_0409200.iso1.exon1.amp1_3910	-0.72575566	-0.686407316	0.272405133	0.039348344	0.238047479	0.999885054	FALSE
1744	PF3D7_1137600.1o2_7251	-0.608897513	-0.633486887	0.272226527	-0.024589374	0.238344108	0.999885054	FALSE
989	PF3D7_0800200.e1s2_5359	-0.974068963	-0.881009928	0.271939048	0.093059035	0.238822146	0.999885054	FALSE
2602	PF3D7_1441700.iso1.exon1.amp1_3909	0.375785121	0.442881094	0.271747874	0.067095973	0.239140447	0.999885054	FALSE
1994	PF3D7_1240900.iso1.exon3.amp1_1880	1.077348553	1.144907316	0.271549877	0.067558763	0.239470449	0.999885054	FALSE
2064	PF3D7_1300200.iso1.exon1.amp1_3602	1.340890851	1.442390682	0.271544956	0.101499831	0.239478655	0.999885054	FALSE
558	PF3D7_0512100.iso1.exon2.amp1_3546	-0.59728915	-0.67357535	0.271412679	-0.0762862	0.239699321	0.999885054	FALSE
865	PF3D7_0711300.iso1.exon1.amp1_3846	-0.55145756	-0.507655203	0.271196842	0.043802357	0.240059713	0.999885054	FALSE
301	PF3D7_0317300.s3_7150	0.900715147	0.971407791	0.271043355	0.070692644	0.240316247	0.999885054	FALSE
2740	PF3D7_1468000.e3_7405	-0.454812577	-0.405665549	0.271018728	0.049147028	0.240357429	0.999885054	FALSE
2500	PF3D7_1420000.3o3_5002	-0.189111119	-0.098087526	0.27043178	0.091023593	0.241340494	0.999885054	FALSE
1703	PF3D7_1129700.iso1.exon1.amp1_1271	-0.375096227	-0.416026682	0.270244322	-0.040930454	0.241655106	0.999885054	FALSE
1146	PF3D7_0831800.2o2_5849	-0.288654776	-0.244054703	0.269840081	0.044600072	0.242334609	0.999885054	FALSE
1067	PF3D7_0812600.iso1.exon2.amp1_4140	-0.216573768	-0.150306929	0.269569356	0.066266839	0.242790492	0.999885054	FALSE
962	PF3D7_0729900.e1s1_5072	-0.633826823	-0.590530835	0.269410717	0.043295988	0.243057931	0.999885054	FALSE
605	PF3D7_0522400.e4s3_7140	-0.208947755	-0.078214599	0.269267801	0.130733156	0.243299056	0.999885054	FALSE
2550	PF3D7_1434100.1o1_7311	-0.809126995	-0.755555477	0.269247051	0.053571518	0.243334079	0.999885054	FALSE
1569	PF3D7_1101700.iso1.exon2.amp1_2140	0.718377618	0.870806749	0.269203799	0.152429131	0.243407098	0.999885054	FALSE
1640	PF3D7_1118300.e1s1_7205	-0.314822977	-0.191675409	0.268953108	0.123147568	0.243830638	0.999885054	FALSE
233	PF3D7_0302500.e6s1_5136	-0.698026529	-0.666750853	0.268710531	0.031275675	0.244241004	0.999885054	FALSE
1358	PF3D7_1003800.e1s2_7780	0.979556886	1.07171043	0.268271017	0.092153544	0.244985861	0.999885054	FALSE
1967	PF3D7_1235200.iso1.exon2.amp1_3400	-0.491640847	-0.409292348	0.268234909	0.082348498	0.245047129	0.999885054	FALSE
2091	PF3D7_1304100.e1s1_8027	-0.644239271	-0.600016157	0.268159522	0.044223114	0.245175086	0.999885054	FALSE
46	PF3D7_0108600.iso1.exon5.amp1_634	-0.281706638	-0.309053034	0.267742923	-0.027346395	0.24588311	0.999885054	FALSE
845	PF3D7_0708400.e1_5679	-0.492180653	-0.440888517	0.267267763	0.051292136	0.246692549	0.999885054	FALSE
2577	PF3D7_1438100.2o3_7000	-0.698661772	-0.648308817	0.2669373	0.050352956	0.247256683	0.999885054	FALSE
717	PF3D7_0617400.s3 (renamed)_7396	0.199205013	0.246891957	0.266829505	0.047686945	0.247440913	0.999885054	FALSE
1469	PF3D7_1022200.e2s1_5154	-0.678949792	-0.654235346	0.266672671	0.024714446	0.247709136	0.999885054	FALSE
281	PF3D7_0312200.iso1.exon1.amp1_3720	-0.538518733	-0.487276402	0.266586478	0.05124233	0.247856642	0.999885054	FALSE
805	PF3D7_0700500.iso1.exon3.amp1_2741	0.197029863	0.266874728	0.266375911	0.069844865	0.24821727	0.999885054	FALSE
1166	PF3D7_0901000.iso1.exon1.amp1_3010	1.242022574	1.302224956	0.266336639	0.060202381	0.248284573	0.999885054	FALSE
947	PF3D7_0726600.1o2_6479	-0.083149004	-0.147983526	0.266119379	-0.064834522	0.248657156	0.999885054	FALSE
428	PF3D7_0416400.iso1.exon2.amp2_3664	-0.504815536	-0.445360529	0.266031583	0.059455006	0.248807839	0.999885054	FALSE
1212	PF3D7_0908500.e15s1_7738	-0.180266334	-0.037542626	0.26601787	0.142723708	0.24883138	0.999885054	FALSE
1661	PF3D7_1122900.e2s2_7971	-0.327791569	-0.233539254	0.265954591	0.094252315	0.248940036	0.999885054	FALSE
576	PF3D7_0516800.iso1.exon1.amp2_530	-0.384765142	-0.433973296	0.26586513	-0.049208154	0.249093709	0.999885054	FALSE
1426	PF3D7_1016200.1o1_8491	0.126222656	0.173471492	0.265845842	0.047248837	0.24912685	0.999885054	FALSE
1431	PF3D7_1016900.e1s1_4855	-0.35935319	-0.305206826	0.265447599	0.054146364	0.249811877	0.999885054	FALSE
1101	PF3D7_0823500.1o1_5877	0.226074985	0.420592008	0.265372043	0.194517024	0.249942004	0.999885054	FALSE
444	PF3D7_0419700.1o1_8146	0.039882005	-0.021938152	0.265009555	-0.061820157	0.250567008	0.999885054	FALSE
1343	PF3D7_1000200.iso1.exon1.amp1_1575	2.21279277	2.339869968	0.264878525	0.127077198	0.250793219	0.999885054	FALSE
602	PF3D7_0521800.iso1.exon1.amp1_1519	-0.698407908	-0.746244122	0.264576516	-0.047836215	0.2513152	0.999885054	FALSE
2047	PF3D7_1253700.iso1.exon1.amp1_1002	-0.166794467	-0.105412494	0.2640422	0.061381973	0.252240695	0.999885054	FALSE
2532	PF3D7_1430300.iso1.exon1.amp1_4287	1.058230765	1.13445179	0.264041219	0.076221025	0.252242397	0.999885054	FALSE
807	PF3D7_0701100.iso1.exon3.amp1_2151	0.874319871	0.970224881	0.263880857	0.09590501	0.252520664	0.999885054	FALSE
1931	PF3D7_1228800.e1s4_5484	-0.046435639	0.021536325	0.263873764	0.067971965	0.252532978	0.999885054	FALSE
1884	PF3D7_1219100.e1s2_9153	-0.582980537	-0.512143518	0.263666876	0.070837018	0.252892333	0.999885054	FALSE
364	PF3D7_0403900.iso1.exon1.amp1_1235	-0.447979615	-0.486783163	0.263440506	-0.038803548	0.253285967	0.999885054	FALSE
765	PF3D7_0627100.iso1.exon1.amp1_4595	-0.23269583	-0.181428246	0.263406264	0.051267584	0.253345552	0.999885054	FALSE
2492	PF3D7_1417600.iso1.exon1.amp5_1911	-0.706366524	-0.533503276	0.263377833	0.172863248	0.253395032	0.999885054	FALSE
2497	PF3D7_1419400.e1s2_6347	-0.672320492	-0.591671719	0.263295241	0.080648772	0.253538813	0.999885054	FALSE
2231	PF3D7_1332900.e1s1_8365	-0.360911532	-0.288516909	0.263008586	0.072394624	0.254038312	0.999885054	FALSE
2694	PF3D7_1458100.iso1.exon1.amp1_1196	-0.721440317	-0.781896442	0.262691207	-0.060456125	0.254592213	0.999885054	FALSE
1301	PF3D7_0930300.s2_8884	1.153003444	1.214205917	0.262510394	0.061202473	0.25490818	0.999885054	FALSE
403	PF3D7_0410800.iso1.exon1.amp2_1340	0.007933757	0.122094403	0.262457351	0.114160647	0.255000928	0.999885054	FALSE
1725	PF3D7_1134500.s1_5988	-0.379950502	-0.301468499	0.26239548	0.078482003	0.255109143	0.999885054	FALSE
377	PF3D7_0405600.2o9_6125	-0.474340412	-0.535814612	0.262188848	-0.0614742	0.255470803	0.999885054	FALSE
2728	PF3D7_1466200.e1s2_7800	-0.258591087	-0.043006049	0.262070148	0.215585038	0.255678731	0.999885054	FALSE
2745	PF3D7_1469100.1o1_6407	-0.352219967	-0.274849108	0.26195782	0.077370859	0.255875616	0.999885054	FALSE
2126	PF3D7_1311000.e2s1_8855	-0.617035331	-0.577351873	0.261824102	0.039683458	0.25611014	0.999885054	FALSE
809	PF3D7_0701800.iso1.exon1.amp1_3301	0.246374343	0.308603642	0.261595343	0.062229299	0.256511729	0.999885054	FALSE
2764	PF3D7_1472300.2o9_5864	-0.418219185	-0.342563939	0.261563708	0.075655246	0.256567302	0.999885054	FALSE
1327	PF3D7_0936400.2o2_8989	-0.253813395	-0.169820535	0.261511408	0.08399286	0.256659197	0.999885054	FALSE
848	PF3D7_0709100.e1s1_4890	-0.693507842	-0.610377959	0.261455978	0.083129883	0.256756617	0.999885054	FALSE
1863	PF3D7_1212500.1o1_4735	-0.818953528	-0.76400732	0.261337065	0.054946208	0.256965707	0.999885054	FALSE
278	PF3D7_0311700.1o15_9041	-0.290349121	-0.24841273	0.261243891	0.041936391	0.257129627	0.999885054	FALSE
1377	PF3D7_1008400.e1s1_5157	-0.733832937	-0.610355062	0.261240646	0.123477875	0.257135338	0.999885054	FALSE
84	PF3D7_0200100 (renamed)_4770	-0.062745389	0.042218048	0.261100081	0.104963437	0.257382784	0.999885054	FALSE
945	PF3D7_0726500.iso1.exon4.amp1_3386	-0.368362913	-0.325491307	0.260965307	0.042871606	0.257620206	0.999885054	FALSE
2309	PF3D7_1352200.iso1.exon6.amp1_4374	-0.705903488	-0.648090421	0.260735983	0.057813067	0.258024565	0.999885054	FALSE
2735	PF3D7_1466900.iso1.exon2.amp2_2482	-0.530662789	-0.493225756	0.260363796	0.037437033	0.258681841	0.999885054	FALSE
935	PF3D7_0725200.iso1.exon3.amp1_3844	-0.390809808	-0.419120975	0.259998706	-0.028311167	0.259327802	0.999885054	FALSE
2485	PF3D7_1417200.e1s4_7723	-0.086613904	0.017520911	0.259579252	0.104134815	0.260071439	0.999885054	FALSE
530	PF3D7_0508000.1o1_6429	-0.31434184	-0.35605907	0.259119864	-0.041717229	0.260887702	0.999885054	FALSE
645	PF3D7_0532300.e2s1_9209	-0.211398999	-0.150745615	0.259062671	0.060653384	0.260989458	0.999885054	FALSE
2244	PF3D7_1335400.iso1.exon2.amp2_3988	-0.10016622	-0.066218469	0.258774453	0.033947751	0.261502705	0.999885054	FALSE
2098	PF3D7_1305300.iso1.exon2.amp1_197	0.115838968	0.158813217	0.258469308	0.042974249	0.262046912	0.999885054	FALSE
2312	PF3D7_1352600.iso1.exon14.amp1_944	-0.373391172	-0.487068536	0.258383383	-0.113677364	0.262200308	0.999885054	FALSE
978	PF3D7_0732300.iso1.exon1.amp1_4175	-0.570274207	-0.369509359	0.258002031	0.200764847	0.262881913	0.999885054	FALSE
1002	PF3D7_0801900.iso1.exon1.amp5_1622	-0.852876717	-0.816405963	0.257132883	0.036470753	0.264440312	0.999885054	FALSE
1776	PF3D7_1145200.iso1.exon1.amp1_1399	-0.544865509	-0.490980835	0.257102605	0.053884674	0.264494726	0.999885054	FALSE
1740	PF3D7_1136900.e2s1_4885	-0.512166455	-0.463390496	0.257077249	0.04877596	0.2645403	0.999885054	FALSE
2132	PF3D7_1312800.iso1.exon1.amp2_2260	-0.360941442	-0.274480433	0.256985015	0.08646101	0.264706127	0.999885054	FALSE
2617	PF3D7_1444100.e8s2_5991	-0.293743235	-0.233617895	0.256962606	0.06012534	0.264746427	0.999885054	FALSE
1587	PF3D7_1105900.iso1.exon1.amp1_1541	-0.786502124	-0.82035753	0.256881548	-0.033855407	0.264892242	0.999885054	FALSE
2551	PF3D7_1434200.e2s1_6007	-0.677256572	-0.630831219	0.256345046	0.046425353	0.265858857	0.999885054	FALSE
1516	PF3D7_1035800.1o1_5041	1.115609956	1.214392319	0.256007989	0.098782363	0.266467472	0.999885054	FALSE
1361	PF3D7_1004800.2o3_6717	-0.215324816	-0.187814232	0.255842753	0.027510584	0.266766211	0.999885054	FALSE
150	PF3D7_0210200.iso1.exon2.amp2_seg1_2597	2.097717131	2.284472208	0.255752566	0.186755077	0.266929371	0.999885054	FALSE
1947	PF3D7_1232100.e2_4807	-0.361400051	-0.330439553	0.255743458	0.030960498	0.266945853	0.999885054	FALSE
24	PF3D7_0103400.e1s1_5925	-0.312281177	-0.139567368	0.255701153	0.17271381	0.267022417	0.999885054	FALSE
331	PF3D7_0323300.1o1_6145	-0.601381951	-0.652125474	0.255332374	-0.050743523	0.26769053	0.999885054	FALSE
2084	PF3D7_1302500.iso1.exon2.amp1_3856	-0.326380375	-0.205404822	0.255038539	0.120975553	0.268223756	0.999885054	FALSE
2008	PF3D7_1244600.e1s1_6033	-0.202011693	-0.090190421	0.25476541	0.111821272	0.268720111	0.999885054	FALSE
1014	PF3D7_0804000.iso1.exon2.amp1_3276	-0.413605873	-0.366317779	0.254620979	0.047288095	0.26898286	0.999885054	FALSE
2307	PF3D7_1352100.iso1.exon1.amp1_2576	-0.54265732	-0.477279347	0.254574109	0.065377972	0.269068168	0.999885054	FALSE
1451	PF3D7_1020300.e1s1_7784	0.082621689	0.159712247	0.254534858	0.077090558	0.269139624	0.999885054	FALSE
1311	PF3D7_0932100.2o5_9117	-0.301294573	-0.237659098	0.2542224	0.063635475	0.269708946	0.999885054	FALSE
921	PF3D7_0722600.e1s1_6051	-0.692496915	-0.637493389	0.254034805	0.055003525	0.270051185	0.999885054	FALSE
598	PF3D7_0521300.iso1.exon3.amp2_seg2_577	-0.336750878	-0.405397103	0.25371407	-0.068646225	0.270637068	0.999885054	FALSE
1662	PF3D7_1122900.e2s3_6815	-0.341646852	-0.269877817	0.253193564	0.071769036	0.27158987	0.999885054	FALSE
1727	PF3D7_1134700.e1_5101	-0.342753025	-0.275437529	0.253127873	0.067315495	0.271710294	0.999885054	FALSE
1642	PF3D7_1119400.iso1.exon1.amp3_2783	-0.215094992	-0.165205385	0.253059485	0.049889607	0.271835707	0.999885054	FALSE
1248	PF3D7_0917000.iso1.exon1.amp2_1923	-0.807884792	-0.768277313	0.252932968	0.039607479	0.272067829	0.999885054	FALSE
1196	PF3D7_0905300.s7_8001	-0.667678179	-0.622207699	0.252771504	0.04547048	0.272364284	0.999885054	FALSE
650	PF3D7_0533100.iso1.exon1.amp3_1389	-0.565422599	-0.616342656	0.252637419	-0.050920057	0.272610651	0.999885054	FALSE
2528	PF3D7_1429200.iso1.exon1.amp2_seg2_3749	-0.255042439	-0.323499086	0.252470311	-0.068456647	0.272917924	0.999885054	FALSE
2368	PF3D7_1364300.iso1.exon1.amp2_1053	-0.420177483	-0.353556293	0.252350535	0.06662119	0.273138321	0.999885054	FALSE
2766	PF3D7_1473100.e1s1_4877	-0.309299204	-0.346542074	0.252060514	-0.03724287	0.273672529	0.999885054	FALSE
2553	PF3D7_1434600.e1s1_6046	-0.151072379	-0.083322117	0.251413923	0.067750263	0.274866302	0.999885054	FALSE
499	PF3D7_0502000.iso1.exon2.amp1_1211	-0.270866918	-0.308164466	0.250737226	-0.037297548	0.276119767	0.999885054	FALSE
1455	PF3D7_1020800.11o11_6470	-0.301138707	-0.357397393	0.249949066	-0.056258686	0.277585001	0.999885054	FALSE
451	PF3D7_0420600.iso1.exon1.amp1_2477	-0.430075427	-0.338473204	0.249637553	0.091602223	0.278165696	0.999885054	FALSE
320	PF3D7_0319900.1o1_4676	-0.124477043	0.055292716	0.249587718	0.179769758	0.278258677	0.999885054	FALSE
351	PF3D7_0401000.iso1.exon1.amp1_2432	1.517471492	1.582532361	0.249515719	0.065060869	0.278393052	0.999885054	FALSE
162	PF3D7_0212500.iso1.exon1.amp1_3098	-0.85318628	-0.801502891	0.249444525	0.051683389	0.278525971	0.999885054	FALSE
2129	PF3D7_1311800.e1s2_5175	-0.553693136	-0.471248969	0.249442152	0.082444167	0.278530401	0.999885054	FALSE
2263	PF3D7_1341600.1o1_4758	-0.687035895	-0.645752126	0.249394447	0.041283769	0.278619495	0.999885054	FALSE
1616	PF3D7_1113000.iso1.exon2.amp1_1889	-0.483175935	-0.441795394	0.249304419	0.041380541	0.278787684	0.999885054	FALSE
755	PF3D7_0625400.1o1_5288	-0.002324129	0.040521655	0.249228028	0.042845784	0.278930456	0.999885054	FALSE
2778	PF3D7_1475500.e1s2_8015	-0.695798991	-0.541342258	0.249198957	0.154456733	0.278984804	0.999885054	FALSE
536	PF3D7_0508900.iso1.exon1.amp4_4215	-0.406771482	-0.371269087	0.249148814	0.035502395	0.27907856	0.999885054	FALSE
2506	PF3D7_1420700.e1_5982	-0.727582807	-0.641234446	0.248820643	0.086348361	0.279692751	0.999885054	FALSE
2726	PF3D7_1465800.e5s4_8014	0.037230418	0.070645453	0.248664027	0.033415034	0.279986216	0.999885054	FALSE
2654	PF3D7_1451100_7386	-0.255510899	-0.206788413	0.248490868	0.048722485	0.280310943	0.999885054	FALSE
1977	PF3D7_1237400.3o3_5573	-0.560861163	-0.498048478	0.248470815	0.062812685	0.280348565	0.999885054	FALSE
117	PF3D7_0204500.1o1_5582	-0.394668178	-0.357941214	0.248292532	0.036726963	0.280683222	0.999885054	FALSE
1970	PF3D7_1235800.iso1.exon4.amp1_2414	-0.301773353	-0.24593928	0.248194539	0.055834073	0.28086729	0.999885054	FALSE
2431	PF3D7_1406400.1o1_7326	-0.69767884	-0.626498267	0.248150706	0.071180573	0.280949654	0.999885054	FALSE
436	PF3D7_0418800.iso1.exon4.amp1_2929	-0.55187862	-0.58010883	0.24809089	-0.028230209	0.281062079	0.999885054	FALSE
2405	PF3D7_1401100.e2s1_8047	-0.023011509	0.04220563	0.24786351	0.065217139	0.281489746	0.999885054	FALSE
2432	PF3D7_1406500.iso1.exon1.amp1_4448	-0.46639577	-0.420523323	0.247836699	0.045872447	0.281540204	0.999885054	FALSE
1263	PF3D7_0920300.1o4_5819	-0.497360424	-0.407050536	0.247573051	0.090309888	0.282036745	0.999885054	FALSE
938	PF3D7_0726400.e1s1_6882	-0.500260163	-0.456010459	0.247566611	0.044249703	0.282048883	0.999885054	FALSE
1192	PF3D7_0905100.iso1.exon2.amp1_4406	-0.322039021	-0.231950953	0.247348619	0.090088068	0.282459935	0.999885054	FALSE
138	PF3D7_0207600.e4s1_8076	-0.629074323	-0.564469249	0.245866112	0.064605074	0.285267041	0.999885054	FALSE
1624	PF3D7_1114900.e1s2_9122	-0.774786873	-0.723479902	0.245411002	0.051306971	0.286132861	0.999885054	FALSE
2800	PF3D7_1479700.iso1.exon2.amp1_4180	0.026635059	0.061859448	0.245141689	0.035224389	0.286646116	0.999885054	FALSE
1968	PF3D7_1235200.iso1.exon2.amp2_2539	-0.243926557	-0.180953193	0.245055275	0.062973364	0.286810945	0.999885054	FALSE
573	PF3D7_0516500.5o6_7013	-0.583651914	-0.555311318	0.244961999	0.028340597	0.28698894	0.999885054	FALSE
1927	PF3D7_1228400.s2_4794	-0.180808577	-0.143655623	0.24444971	0.037152954	0.287967964	0.999885054	FALSE
1268	PF3D7_0921400.e1_5664	-0.601116629	-0.552255009	0.24439179	0.04886162	0.288078807	0.999885054	FALSE
1637	PF3D7_1118100.iso1.exon1.amp1_3510	-0.545765368	-0.580665882	0.244362496	-0.034900514	0.288134878	0.999885054	FALSE
561	PF3D7_0513000.e1s1_5733	-0.385944703	-0.347477074	0.244321833	0.038467629	0.288212724	0.999885054	FALSE
1895	PF3D7_1221000.e1s3_4910	0.840444212	1.001355498	0.244191359	0.160911287	0.288462614	0.999885054	FALSE
2452	PF3D7_1409300.1o1_4987	-0.410932915	-0.286979852	0.244088801	0.123953063	0.288659146	0.999885054	FALSE
1372	PF3D7_1007800.iso1.exon1.amp1_1414	-0.67340513	-0.775228612	0.243876561	-0.101823482	0.289066176	0.999885054	FALSE
1951	PF3D7_1233200.iso2.exon1.amp2_seg2_2883	-0.681327678	-0.644693173	0.243835613	0.036634505	0.289144752	0.999885054	FALSE
588	PF3D7_0519000.iso1.exon1.amp1_4167	-0.496629963	-0.465037395	0.243536115	0.031592569	0.289719946	0.999885054	FALSE
896	PF3D7_0718000.e4s1_4866	-0.360634477	-0.286983418	0.243342443	0.073651059	0.290092341	0.999885054	FALSE
442	PF3D7_0419400.4o4_8537	-0.749850771	-0.806666655	0.243341177	-0.056815884	0.290094777	0.999885054	FALSE
2517	PF3D7_1426500.e1s1_7498	-0.731948249	-0.633383903	0.242995307	0.098564346	0.29076069	0.999885054	FALSE
1140	PF3D7_0831200.iso1.exon1.amp1_2190	-0.05423575	-0.020235013	0.242832967	0.034000737	0.291073632	0.999885054	FALSE
1560	PF3D7_1100200.e1s3_7392	-0.193928764	-0.153667681	0.242594686	0.040261083	0.291533404	0.999885054	FALSE
2598	PF3D7_1441200.e2_7109	-0.522877837	-0.442990192	0.24251312	0.079887645	0.291690912	0.999885054	FALSE
2630	PF3D7_1446800.e1s1_5138	-0.702150977	-0.660537748	0.242495761	0.041613229	0.29172444	0.999885054	FALSE
1783	PF3D7_1146700.iso1.exon1.amp1_3331	-0.291790225	-0.209332372	0.242450046	0.082457853	0.291812752	0.999885054	FALSE
408	PF3D7_0411900.iso1.exon2.amp2_seg2_2021	-0.805377703	-0.767703964	0.242351314	0.03767374	0.292003546	0.999885054	FALSE
2488	PF3D7_1417300.iso1.exon1.amp2_808	-0.299515388	-0.496712149	0.242094909	-0.19719676	0.29249946	0.999885054	FALSE
2396	PF3D7_1373400.iso1.exon2.amp1_2732	0.714557325	0.80190038	0.2419978	0.087343055	0.292687439	0.999885054	FALSE
413	PF3D7_0412700.iso1.exon2.amp2_1081	-0.27720593	-0.155498476	0.241833643	0.121707454	0.293005403	0.999885054	FALSE
1118	PF3D7_0826300.1o1_6730	0.503400798	0.573702665	0.241743888	0.070301867	0.293179362	0.999885054	FALSE
1988	PF3D7_1239800.s5_6570	0.887100457	0.926743514	0.241591502	0.039643057	0.293474878	0.999885054	FALSE
843	PF3D7_0708000.e1s1_9235	-0.53485139	-0.470355872	0.241519847	0.064495518	0.293613911	0.999885054	FALSE
1174	PF3D7_0902300.2o3_7037	0.032643697	0.105237157	0.241480498	0.07259346	0.29369028	0.999885054	FALSE
1312	PF3D7_0932300.e1s1_4887	-0.283252974	-0.207797472	0.24128204	0.075455502	0.29407567	0.999885054	FALSE
146	PF3D7_0209100.2o3_8219	-0.369549359	-0.258972937	0.240951246	0.110576422	0.294718862	0.999885054	FALSE
1198	PF3D7_0905600.2o2_5648	-0.53461249	-0.508760324	0.240906451	0.025852166	0.29480604	0.999885054	FALSE
565	PF3D7_0513400.iso1.exon2.amp1_92	-0.248885365	-0.281805433	0.240892011	-0.032920068	0.294834145	0.999885054	FALSE
481	PF3D7_0500100.iso1.exon1.amp1_2232	-0.614624733	-0.554534639	0.240559998	0.060090093	0.295480914	0.999885054	FALSE
2066	PF3D7_1300300.e1s2_5370	-0.586465641	-0.548431001	0.240469401	0.038034639	0.295657578	0.999885054	FALSE
1460	PF3D7_1021600.e1s1_6028	-0.507626104	-0.467171052	0.240440746	0.040455052	0.295713469	0.999885054	FALSE
1346	PF3D7_1000500.iso1.exon3.amp1_4465	0.628125325	0.676053716	0.240311877	0.047928391	0.295964929	0.999885054	FALSE
1819	PF3D7_1202300.e33s1_5173	-0.215928758	-0.156760754	0.240248189	0.059168004	0.296089259	0.999885054	FALSE
232	PF3D7_0302500.e1s1_7185	1.10809599	1.191935076	0.240164086	0.083839086	0.296253501	0.999885054	FALSE
58	PF3D7_0110800.iso1.exon3.amp1_2717	-0.571254514	-0.506502539	0.240113164	0.064751975	0.296352976	0.999885054	FALSE
10	PF3D7_0100800.iso1.exon2.amp1_133	-0.149187415	-0.212662985	0.240094281	-0.06347557	0.29638987	0.999885054	FALSE
1769	PF3D7_1143000.iso1.exon1.amp1_3893	-0.575218192	-0.52871101	0.239969111	0.046507182	0.296634513	0.999885054	FALSE
892	PF3D7_0717300.1o4_7894	-0.558873287	-0.503958623	0.239961758	0.054914665	0.296648889	0.999885054	FALSE
1114	PF3D7_0826100.s2_5703	-0.323326005	-0.267169163	0.239824515	0.056156842	0.296917305	0.999885054	FALSE
2163	PF3D7_1319900.s1_7683	-0.501913305	-0.418221573	0.239779716	0.083691732	0.29700496	0.999885054	FALSE
731	PF3D7_0619900.iso1.exon1.amp1_2419	-0.539130033	-0.468904547	0.239039608	0.070225486	0.298455777	0.999885054	FALSE
1882	PF3D7_1219000.iso1.exon1.amp1_seg1_4603	0.064424785	0.116435424	0.238878957	0.052010639	0.298771372	0.999885054	FALSE
1595	PF3D7_1107800.e2s1_7678	-0.312948463	-0.416307133	0.238822976	-0.103358669	0.298881402	0.999885054	FALSE
724	PF3D7_0619000.1.12o14_6224	-0.875260365	-0.800298925	0.23877937	0.07496144	0.298967129	0.999885054	FALSE
922	PF3D7_0722800.1o1_5891	0.432875434	0.567045445	0.238593711	0.134170011	0.299332325	0.999885054	FALSE
2111	PF3D7_1308200.e2s2_7507	-0.250776324	-0.207536362	0.238073165	0.043239962	0.300357962	0.999885054	FALSE
2187	PF3D7_1324300.e1s6_8878	-0.863170402	-0.819052114	0.237951462	0.044118287	0.300598121	0.999885054	FALSE
2632	PF3D7_1447000.e3s1_5730	-0.613634057	-0.584125082	0.237640261	0.029508975	0.301212844	0.999885054	FALSE
49	PF3D7_0109200.iso1.exon1.amp1_2413	-0.712376626	-0.653346471	0.237572204	0.059030155	0.301347399	0.999885054	FALSE
1664	PF3D7_1123000.iso1.exon1.amp3_1921	-0.344843459	-0.308170928	0.237427707	0.036672531	0.301633227	0.999885054	FALSE
1315	PF3D7_0933500.s1_5707	-0.258821691	-0.230005111	0.23731015	0.02881658	0.301865911	0.999885054	FALSE
2554	PF3D7_1434700.1o1_7846	-0.092161068	-0.010656885	0.236624994	0.081504182	0.303224618	0.999885054	FALSE
380	PF3D7_0405900.e3s1_6875	-0.187455482	-0.143078797	0.236593044	0.044376684	0.303288082	0.999885054	FALSE
1475	PF3D7_1023200.1o1_6706	-0.203428597	-0.136227092	0.236520501	0.067201506	0.303432219	0.999885054	FALSE
806	PF3D7_0701000.1o1_5806	1.248539971	1.334988484	0.236463867	0.086448513	0.30354478	0.999885054	FALSE
2775	PF3D7_1475400.e2s3_6569	-0.755433573	-0.7108077	0.236431955	0.044625873	0.303608217	0.999885054	FALSE
697	PF3D7_0609900.iso1.exon1.amp2_2850	-0.810006626	-0.744693713	0.236290323	0.065312913	0.303889885	0.999885054	FALSE
615	PF3D7_0524500.1o1_5233	-0.055182075	-0.120882385	0.236066817	-0.06570031	0.304334759	0.999885054	FALSE
1323	PF3D7_0935900.e1s1_8599	-0.277103849	-0.324238693	0.235954955	-0.047134844	0.304557588	0.999885054	FALSE
2588	PF3D7_1440000.iso1.exon5.amp1_797	-0.541397658	-0.501349227	0.23583901	0.040048431	0.304788675	0.999885054	FALSE
590	PF3D7_0519200.e2s1_5387	-0.504644144	-0.547106515	0.235671287	-0.042462371	0.305123181	0.999885054	FALSE
2267	PF3D7_1343200.1o1_6173	-0.629543565	-0.53367364	0.235395069	0.095869925	0.305674641	0.999885054	FALSE
2780	PF3D7_1475800.1o2_6710	0.29150434	0.383803753	0.235309303	0.092299412	0.305846015	0.999885054	FALSE
2082	PF3D7_1302500.iso1.exon1.amp1_4546	-0.648124362	-0.585176601	0.234322218	0.062947761	0.307823327	0.999885054	FALSE
1780	PF3D7_1145900.iso1.exon2.amp1_376	-0.367498752	-0.451367612	0.234192486	-0.08386886	0.308083883	0.999885054	FALSE
2165	PF3D7_1320700.iso1.exon1.amp1_3712	-0.217563941	-0.281434344	0.234083875	-0.063870403	0.30830214	0.999885054	FALSE
2424	PF3D7_1405400.e2s1_8325	-0.379538416	-0.322360197	0.234035534	0.057178219	0.308399317	0.999885054	FALSE
1702	PF3D7_1129600.e1s1_8953	-0.580440715	-0.498875265	0.233647376	0.08156545	0.30918041	0.999885054	FALSE
1851	PF3D7_1210100.1o1_7277	-0.311583934	-0.229231529	0.233260729	0.082352405	0.309959866	0.999885054	FALSE
1222	PF3D7_0910000.iso1.exon1.amp2_1355	-0.560623933	-0.596813131	0.233253198	-0.036189198	0.30997506	0.999885054	FALSE
2361	PF3D7_1361900.e1s1_8335	-0.089039188	-0.044407494	0.233197841	0.044631695	0.310086776	0.999885054	FALSE
381	PF3D7_0406200_8002	0.557803533	0.659571057	0.23310648	0.101767524	0.310271212	0.999885054	FALSE
2507	PF3D7_1420800.iso1.exon4.amp1_2704	-0.021979057	0.033951023	0.23307715	0.05593008	0.310330439	0.999885054	FALSE
1239	PF3D7_0914200.3o4_7023	-0.355984189	-0.309004913	0.232677886	0.046979276	0.311137486	0.999885054	FALSE
1097	PF3D7_0822600.e2s1_7209	-1.31457867	-1.254216078	0.232536456	0.060362592	0.311423722	0.999885054	FALSE
313	PF3D7_0318500.iso1.exon1.amp4_222	-0.418027573	-0.502572482	0.232227464	-0.084544909	0.312049736	0.999885054	FALSE
2095	PF3D7_1304500.e1s1_6309	-0.472082961	-0.430088179	0.23210182	0.041994781	0.312304546	0.999885054	FALSE
2595	PF3D7_1440400.iso1.exon2.amp2_seg2_3467	-0.216101624	-0.161303547	0.231798408	0.054798077	0.312920483	0.999885054	FALSE
2751	PF3D7_1469600.e1s4_8591	0.246992483	0.286470597	0.231753469	0.039478114	0.313011784	0.999885054	FALSE
830	PF3D7_0704900.iso1.exon1.amp1_3311	-0.460671223	-0.36502182	0.231628392	0.095649403	0.313265998	0.999885054	FALSE
500	PF3D7_0502200.2o2_5863	-0.612439636	-0.546363278	0.231432866	0.066076359	0.313663694	0.999885054	FALSE
2419	PF3D7_1404900.e1s1_6029	-0.433014702	-0.388354142	0.230468653	0.044660561	0.315630123	0.999885054	FALSE
453	PF3D7_0420900.iso1.exon1.amp1_4190	0.11734984	0.176208647	0.230434326	0.058858807	0.315700291	0.999885054	FALSE
1479	PF3D7_1024400.1o2_7617	-0.468651009	-0.417320302	0.230330851	0.051330707	0.315911873	0.999885054	FALSE
1237	PF3D7_0914000.1o1_7665	-0.893426077	-0.843204842	0.230323148	0.050221235	0.315927627	0.999885054	FALSE
866	PF3D7_0711700.e2s1_5452	1.631336363	1.686570816	0.230288941	0.055234453	0.315997598	0.999885054	FALSE
2776	PF3D7_1475400.e3s4_5702	-0.737279278	-0.701088424	0.230234309	0.036190853	0.316109368	0.999885054	FALSE
435	PF3D7_0418000.7o10_5069	-0.800370728	-0.766271555	0.230061272	0.034099173	0.316463567	0.999885054	FALSE
2344	PF3D7_1359000.iso1.exon1.amp2_seg1_1152	-0.291964389	-0.246232923	0.230058819	0.045731466	0.31646859	0.999885054	FALSE
927	PF3D7_0723700.iso1.exon1.amp2_1934	-0.846979249	-0.816983567	0.229830959	0.029995682	0.316935444	0.999885054	FALSE
2144	PF3D7_1314800.1o2_5818	-1.006007063	-0.887157234	0.229675727	0.118849829	0.317253772	0.999885054	FALSE
1817	PF3D7_1202300.e14s1_9188	-0.753868154	-0.706700281	0.22963923	0.047167873	0.317328649	0.999885054	FALSE
1173	PF3D7_0902200.2o3_7910	0.182633369	0.265066721	0.229333894	0.082433352	0.317955554	0.999885054	FALSE
794	PF3D7_0632400.iso1.exon2.amp1_3304	0.421610006	0.530432884	0.229140281	0.108822878	0.318353529	0.999885054	FALSE
1659	PF3D7_1122800.e1s1_6545	0.513108871	0.587030578	0.22907789	0.073921707	0.31848185	0.999885054	FALSE
767	PF3D7_0628000.1o1_7263	-0.230756112	-0.179148935	0.228899615	0.051607177	0.318848713	0.999885054	FALSE
1948	PF3D7_1232600.iso1.exon1.amp1_709	-0.570757749	-0.515151686	0.228739164	0.055606063	0.319179152	0.999885054	FALSE
674	PF3D7_0604500.iso1.exon1.amp3_3986	0.111080094	0.208570296	0.227804819	0.097490202	0.32110819	0.999885054	FALSE
1552	PF3D7_1041200.iso1.exon2.amp1_2153	0.505444556	0.547415556	0.227723994	0.041971	0.321275446	0.999885054	FALSE
1608	PF3D7_1111600.iso1.exon1.amp1_437	-0.109950517	-0.045596759	0.227512891	0.064353758	0.321712586	0.999885054	FALSE
1102	PF3D7_0823800_6524	-0.782881379	-0.82297521	0.227318982	-0.040093831	0.322114489	0.999885054	FALSE
1442	PF3D7_1018300.e2s2_5481	-0.525524484	-0.565800803	0.227088514	-0.040276319	0.322592627	0.999885054	FALSE
992	PF3D7_0800300.e2s1_8914	2.076686612	2.129150903	0.226932254	0.052464292	0.322917095	0.999885054	FALSE
1291	PF3D7_0928600.1o1_6100	-0.67859591	-0.723136969	0.226888779	-0.044541058	0.32300741	0.999885054	FALSE
1875	PF3D7_1216500.e1s1_7177	-0.501496096	-0.440035152	0.226792562	0.061460944	0.323207356	0.999885054	FALSE
1345	PF3D7_1000400.iso1.exon1.amp1_1864	0.201643138	0.255368636	0.226697777	0.053725498	0.32340441	0.999885054	FALSE
1187	PF3D7_0903700.e3s1_4884	0.284414651	0.379275949	0.226213913	0.094861298	0.324411658	0.999885054	FALSE
1243	PF3D7_0916200.iso1.exon1.amp1_2352	-0.43003026	-0.393023292	0.226186667	0.037006968	0.324468443	0.999885054	FALSE
2270	PF3D7_1343600.e2_7984	-0.978688769	-0.924456805	0.226121109	0.054231964	0.3246051	0.999885054	FALSE
1054	PF3D7_0809100.iso1.exon2.amp2_seg2_2600	-0.533429967	-0.491962834	0.226102606	0.041467133	0.324643677	0.999885054	FALSE
1281	PF3D7_0924600.iso1.exon2.amp2_seg1_2289	-0.681881643	-0.649094889	0.225899026	0.032786754	0.325068339	0.999885054	FALSE
2486	PF3D7_1417200.e1s5_9164	0.842286047	0.921563124	0.225872371	0.079277076	0.325123969	0.999885054	FALSE
1944	PF3D7_1231600.iso1.exon1.amp2_1920	-0.555076659	-0.482823589	0.225570154	0.07225307	0.32575518	0.999885054	FALSE
925	PF3D7_0723400.e1s2_6637	-0.396418773	-0.34442082	0.225560102	0.051997953	0.325776188	0.999885054	FALSE
2395	PF3D7_1373300.iso1.exon2.amp1_4186	-0.165730644	-0.135393051	0.225465459	0.030337593	0.325974044	0.999885054	FALSE
2702	PF3D7_1459800.1o4_8156	-0.672131457	-0.711163792	0.225392952	-0.039032334	0.326125683	0.999885054	FALSE
2757	PF3D7_1470600.2o3_6463	-0.275278065	-0.312174802	0.225233859	-0.036896736	0.326458574	0.999885054	FALSE
401	PF3D7_0410300.1o2_7946	0.022037989	0.143678903	0.225105241	0.121640914	0.326727876	0.999885054	FALSE
704	PF3D7_0613300.iso1.exon3.amp1_635	-0.54691607	-0.592800635	0.224139468	-0.045884565	0.328754988	0.999885054	FALSE
2192	PF3D7_1325900.e1s1_8003	0.241694975	0.32557234	0.223766223	0.083877364	0.329540768	0.999885054	FALSE
2352	PF3D7_1360100.e3s1_4854	-0.549921747	-0.521475098	0.223764375	0.028446649	0.329544661	0.999885054	FALSE
2203	PF3D7_1328200.iso1.exon2.amp1_1256	-0.365449295	-0.409333971	0.223700163	-0.043884676	0.329679978	0.999885054	FALSE
267	PF3D7_0310500.e1s1_7495	-0.313836177	-0.27030973	0.223603237	0.043526447	0.32988431	0.999885054	FALSE
1207	PF3D7_0907600.iso1.exon2.amp1_4206	-0.578569423	-0.52085873	0.22345022	0.057710693	0.330207066	0.999885054	FALSE
2087	PF3D7_1302700.iso1.exon1.amp2_1069	0.142388225	0.260698904	0.223356736	0.118310679	0.330404358	0.999885054	FALSE
1508	PF3D7_1034900.e1s1_8260	-0.588401208	-0.52171592	0.223267702	0.066685288	0.330592337	0.999885054	FALSE
1670	PF3D7_1124100.iso1.exon1.amp1_1988	0.223888646	0.349611627	0.223209606	0.125722981	0.330715034	0.999885054	FALSE
2121	PF3D7_1310200.2o2_8992	-0.290016218	-0.227176554	0.223019639	0.062839663	0.331116467	0.999885054	FALSE
1399	PF3D7_1012600.e1s1_9222	-0.983432063	-0.939468392	0.222933796	0.043963671	0.331297979	0.999885054	FALSE
2587	PF3D7_1439800.e1_8850	-0.636900175	-0.590137919	0.222922421	0.046762255	0.331322037	0.999885054	FALSE
1104	PF3D7_0824200.iso1.exon2.amp1_seg1_3174	-0.291487085	-0.318695248	0.222776142	-0.027208163	0.331631515	0.999885054	FALSE
1202	PF3D7_0906300.1o1_4700	-0.04968699	0.023615898	0.222624826	0.073302887	0.331951863	0.999885054	FALSE
1486	PF3D7_1028300.e1s1_5740	-0.517256224	-0.47880413	0.222471858	0.038452095	0.332275927	0.999885054	FALSE
1814	PF3D7_1201400.iso1.exon1.amp1_218	1.119689717	1.170081683	0.222336226	0.050391966	0.33256345	0.999885054	FALSE
1866	PF3D7_1212900.e1s1_8355	0.182967861	0.267401808	0.221830243	0.084433947	0.3336376	0.999885054	FALSE
139	PF3D7_0207700.2o4_5642	0.542821203	0.674942197	0.221521191	0.132120994	0.334294875	0.999885054	FALSE
1265	PF3D7_0920800.e1s1_4875	-0.429202121	-0.380208739	0.2214633	0.048993382	0.334418095	0.999885054	FALSE
127	PF3D7_0207000.1o2_6703	0.754446263	0.882065563	0.221144037	0.1276193	0.335098207	0.999885054	FALSE
1258	PF3D7_0919400.e1s1_4873	-0.512197334	-0.449098432	0.220951359	0.063098902	0.335509126	0.999885054	FALSE
636	PF3D7_0529400.1.e7s1_6001	-0.567308516	-0.488272007	0.220793297	0.079036509	0.335846481	0.999885054	FALSE
257	PF3D7_0308700.iso1.exon1.amp1_2745	0.681235735	0.749590594	0.220778314	0.068354859	0.335878472	0.999885054	FALSE
537	PF3D7_0509000.e5s1_6290	-0.415588763	-0.354250135	0.220539337	0.061338628	0.336389009	0.999885054	FALSE
800	PF3D7_0632800.iso1.exon1.amp1_4482	-0.141809789	-0.081478054	0.220271579	0.060331735	0.336961672	0.999885054	FALSE
2743	PF3D7_1468300.iso1.exon2.amp1_2138	0.279177085	0.238459911	0.220183401	-0.040717175	0.337150411	0.999885054	FALSE
1338	PF3D7_0937600.iso1.exon2.amp1_3322	1.093650581	1.174286566	0.21962838	0.080635985	0.338340072	0.999885054	FALSE
1341	PF3D7_0937800.iso1.exon2.amp1_1654	-0.23596346	-0.18076265	0.219567721	0.055200811	0.338470266	0.999885054	FALSE
1918	PF3D7_1226400.iso1.exon3.amp1_1587	-0.333729863	-0.394871396	0.219431335	-0.061141532	0.338763126	0.999885054	FALSE
309	PF3D7_0318200.e1s1_8532	-0.682171938	-0.7648994	0.219232481	-0.082727461	0.339190439	0.999885054	FALSE
172	PF3D7_0214300.iso1.exon1.amp2_2848	-0.570882645	-0.523021375	0.218984854	0.04786127	0.33972308	0.999885054	FALSE
1784	PF3D7_1146800.e3s1_4831	0.081234539	0.163894926	0.218843397	0.082660387	0.340027611	0.999885054	FALSE
195	PF3D7_0222000.iso1.exon1.amp1_691	-0.705090636	-0.648716352	0.218619419	0.056374285	0.340510182	0.999885054	FALSE
1533	PF3D7_1038400.e1s1_8544	-0.261041029	-0.30747055	0.218378995	-0.046429521	0.341028713	0.999885054	FALSE
1748	PF3D7_1138100.1o1_8413	-0.568727553	-0.624343874	0.218032851	-0.055616321	0.341776213	0.999885054	FALSE
2252	PF3D7_1337700.iso1.exon2.amp1_1528	-0.534297098	-0.593119428	0.218014523	-0.05882233	0.341815825	0.999885054	FALSE
359	PF3D7_0402100.e2s1_6909	-0.339618353	-0.250429762	0.217925195	0.08918859	0.342008928	0.999885054	FALSE
552	PF3D7_0511400.1o1_4698	-0.337845555	-0.303877534	0.217435809	0.033968021	0.343068191	0.999885054	FALSE
1762	PF3D7_1140900.3o6_8819	-0.665886547	-0.62028135	0.217354706	0.045605197	0.343243954	0.999885054	FALSE
1410	PF3D7_1014000.iso1.exon7.amp1_955	-0.532312916	-0.493958484	0.217092355	0.038354432	0.343812937	0.999885054	FALSE
2533	PF3D7_1430300.iso1.exon1.amp2_4576	-0.560322121	-0.52754883	0.216924876	0.03277329	0.344176504	0.999885054	FALSE
2793	PF3D7_1477900.3o3_5341	-0.306617427	-0.259483634	0.216730682	0.047133792	0.344598397	0.999885054	FALSE
571	PF3D7_0516000.iso1.exon1.amp1_2533	-0.610653473	-0.549107743	0.216467839	0.06154573	0.345169998	0.999885054	FALSE
1836	PF3D7_1207200.iso1.exon1.amp3_2782	-0.594633948	-0.555832266	0.21645974	0.038801682	0.345187622	0.999885054	FALSE
1412	PF3D7_1014100.s2_5660	1.046454581	1.093283346	0.216413548	0.046828765	0.345288146	0.999885054	FALSE
1231	PF3D7_0912500.2o7_6421	-0.48288079	-0.444394322	0.216346705	0.038486468	0.345433646	0.999885054	FALSE
2238	PF3D7_1334200.e1s1_6893	-0.273255022	-0.185955119	0.216040101	0.087299903	0.346101591	0.999885054	FALSE
1152	PF3D7_0833000.iso1.exon3.amp1_3881	0.775246812	0.817419221	0.215871999	0.042172409	0.346468182	0.999885054	FALSE
1900	PF3D7_1221900.1o1_9091	-0.446321836	-0.410668571	0.21566507	0.035653265	0.346919812	0.999885054	FALSE
1733	PF3D7_1136200.1o5_8797	-0.135155708	-0.187142001	0.215551043	-0.051986293	0.347168855	0.999885054	FALSE
663	PF3D7_0602100.iso1.exon1.amp2_1960	-0.261659227	-0.19791666	0.215330634	0.063742566	0.347650588	0.999885054	FALSE
229	PF3D7_0302200.e2_6826	-0.578239516	-0.554697865	0.215181975	0.023541651	0.347975761	0.999885054	FALSE
1596	PF3D7_1107900.iso1.exon1.amp1_542	-0.413627154	-0.510736561	0.215040917	-0.097109407	0.348284501	0.999885054	FALSE
2722	PF3D7_1465300.e1_8851	-0.118281042	-0.08407071	0.21500887	0.034210332	0.348354671	0.999885054	FALSE
78	PF3D7_0115000.e1s1_6895	-0.18802987	-0.137685374	0.214885096	0.050344496	0.348625774	0.999885054	FALSE
2640	PF3D7_1448500.e1s1_4836	-0.90284558	-0.874392167	0.21488371	0.028453413	0.348628811	0.999885054	FALSE
2729	PF3D7_1466200.e1s3_7511	0.253835614	0.187413405	0.214615102	-0.066422209	0.349217645	0.999885054	FALSE
1195	PF3D7_0905300.s6_8296	0.070781005	-0.016612459	0.214419805	-0.087393465	0.349646197	0.999885054	FALSE
258	PF3D7_0308900.iso1.exon1.amp2_1908	-0.739051853	-0.707997082	0.214340305	0.031054771	0.349820754	0.999885054	FALSE
467	PF3D7_0423700.1o1_6673	0.948160093	1.007031958	0.214232922	0.058871865	0.350056626	0.999885054	FALSE
466	PF3D7_0423400.1o1_7833	-0.328444868	-0.29078165	0.214222003	0.037663217	0.350080615	0.999885054	FALSE
230	PF3D7_0302200.e8_5663	-0.752152653	-0.719251308	0.214168884	0.032901344	0.350197338	0.999885054	FALSE
1367	PF3D7_1006500.1o1_7278	-0.076776258	0.041950943	0.213940378	0.118727201	0.350699764	0.999885054	FALSE
2298	PF3D7_1349000.iso1.exon8.amp1_2069	-0.557682833	-0.498939766	0.213619597	0.058743067	0.351405909	0.999885054	FALSE
2519	PF3D7_1426800.iso1.exon1.amp1_4156	-0.347293918	-0.419389377	0.213611835	-0.072095458	0.351423008	0.999885054	FALSE
2182	PF3D7_1322300.e3s2_4896	-0.353332449	-0.282924348	0.213333039	0.070408101	0.352037543	0.999885054	FALSE
2613	PF3D7_1444000.iso1.exon2.amp1_3535	-0.61968653	-0.677547239	0.213183189	-0.05786071	0.352368151	0.999885054	FALSE
151	PF3D7_0210300.e2_9137	-0.60396939	-0.539204339	0.212891682	0.064765051	0.353011902	0.999885054	FALSE
2177	PF3D7_1322000.1o4_7913	-0.630583871	-0.577843227	0.212734351	0.052740645	0.353359678	0.999885054	FALSE
2589	PF3D7_1440000.iso1.exon5.amp2_seg2_2022	-0.145757171	-0.112507401	0.21229853	0.033249769	0.354324272	0.999885054	FALSE
1985	PF3D7_1239400.1o1_5240	-0.788295843	-0.732003186	0.212202073	0.056292657	0.354538002	0.999885054	FALSE
2712	PF3D7_1463200.e2s1_8056	-0.198235385	-0.122442816	0.211984643	0.075792569	0.355020103	0.999885054	FALSE
212	PF3D7_0300500.iso1.exon1.amp1_134	-0.08747685	-0.123501984	0.211579111	-0.036025135	0.355920475	0.999885054	FALSE
1053	PF3D7_0809100.iso1.exon2.amp1_1077	-0.441328809	-0.396517636	0.21138022	0.044811172	0.356362625	0.999885054	FALSE
2002	PF3D7_1243900.iso1.exon4.amp1_2178	-0.38783873	-0.337510954	0.211161234	0.050327776	0.356849881	0.999885054	FALSE
414	PF3D7_0412900.iso1.exon1.amp1_435	1.458249047	1.54022604	0.211140783	0.081976993	0.35689541	0.999885054	FALSE
279	PF3D7_0311800.e3_7124	-0.445497474	-0.402724113	0.210944771	0.042773361	0.357331969	0.999885054	FALSE
2727	PF3D7_1465900.e3s1_8909	-0.294357932	-0.345914554	0.210800592	-0.051556623	0.357653316	0.999885054	FALSE
120	PF3D7_0206000.s2_8261	0.479792852	0.527894402	0.210574026	0.04810155	0.358158688	0.999885054	FALSE
1870	PF3D7_1215100.e1s1_8868	-0.345528073	-0.265735921	0.210172726	0.079792152	0.359055005	0.999885054	FALSE
1518	PF3D7_1036000.1o1_5293	0.753207087	0.826968511	0.209588411	0.073761424	0.360362817	0.999885054	FALSE
2445	PF3D7_1408700.e1s3_7720	-0.789017129	-0.755223262	0.209375152	0.033793867	0.360840935	0.999885054	FALSE
196	PF3D7_0222100.iso1.exon1.amp1_3007	0.722093302	0.831799251	0.209351993	0.109705949	0.360892882	0.999885054	FALSE
2301	PF3D7_1350100.e2s1_7471	-0.170495236	-0.081084977	0.209098197	0.089410259	0.361462499	0.999885054	FALSE
1136	PF3D7_0830800.iso1.exon1.amp2_4505	-0.247384064	-0.183219196	0.208999448	0.064164868	0.361684296	0.999885054	FALSE
1189	PF3D7_0903800.iso1.exon2.amp2_3644	-0.079489446	-0.213598823	0.208973582	-0.134109377	0.361742406	0.999885054	FALSE
649	PF3D7_0533100.iso1.exon1.amp2_3418	-0.420000559	-0.382826546	0.208326352	0.037174013	0.363198561	0.999885054	FALSE
1313	PF3D7_0932700.iso1.exon1.amp2_4526	-0.344154662	-0.295265566	0.208025237	0.048889097	0.363877364	0.999885054	FALSE
153	PF3D7_0210700.1o1_6705	-0.340788449	-0.297037497	0.207325823	0.043750953	0.365457363	0.999885054	FALSE
1580	PF3D7_1103800.e1s1_7393	1.239112059	1.332779501	0.206938349	0.093667441	0.366334667	0.999885054	FALSE
2610	PF3D7_1442900.s2_7728	-0.617724659	-0.560973949	0.206874558	0.05675071	0.366479236	0.999885054	FALSE
2011	PF3D7_1246000.2o4_7886	-0.418580563	-0.37615275	0.206640147	0.042427813	0.367010812	0.999885054	FALSE
2134	PF3D7_1312900.iso1.exon3.amp2_3928	-0.910583128	-0.859898164	0.206467612	0.050684965	0.367402401	0.999885054	FALSE
746	PF3D7_0623300.iso1.exon4.amp1_75	-0.330081036	-0.351770011	0.206359189	-0.021688974	0.367648624	0.999885054	FALSE
116	PF3D7_0204300.1o1_4751	-0.570215907	-0.454258413	0.205918037	0.115957494	0.368651606	0.999885054	FALSE
2235	PF3D7_1333900.iso1.exon2.amp1_1887	-0.55509313	-0.524731088	0.20566489	0.030362042	0.369227977	0.999885054	FALSE
2140	PF3D7_1314200.e1s3_7715	-0.793131861	-0.74739332	0.205656151	0.045738541	0.369247886	0.999885054	FALSE
507	PF3D7_0503900.2o2_5032	-0.591895983	-0.556551396	0.205530917	0.035344587	0.369533255	0.999885054	FALSE
785	PF3D7_0631000.iso1.exon1.amp1_2426	-0.750398528	-0.721479648	0.205514986	0.02891888	0.369569568	0.999885054	FALSE
198	PF3D7_0222600.iso1.exon2.amp1_1008	0.303481767	0.366493991	0.205072233	0.063012224	0.370579723	0.999885054	FALSE
1612	PF3D7_1112100.iso1.exon1.amp1_1397	-0.347821157	-0.406343763	0.20507162	-0.058522606	0.370581121	0.999885054	FALSE
1926	PF3D7_1228300.iso1.exon1.amp1_2480	-0.486480828	-0.45632002	0.204904888	0.030160808	0.370962007	0.999885054	FALSE
1862	PF3D7_1212400.1o1_5266	-0.456452437	-0.497198315	0.204580374	-0.040745878	0.371704081	0.999885054	FALSE
1758	PF3D7_1139500.1.e1s1_5751	0.291246147	0.358243844	0.204433748	0.066997697	0.372039703	0.999885054	FALSE
460	PF3D7_0422300.e3s1_6907	-0.1784812	-0.142630089	0.204354253	0.035851112	0.372221747	0.999885054	FALSE
2232	PF3D7_1333200.s2_5398	-0.836792438	-0.788642995	0.203839025	0.048149443	0.373403076	0.999885054	FALSE
1175	PF3D7_0902400.iso1.exon2.amp1_1014	-0.416016321	-0.362049295	0.203797489	0.053967027	0.37349842	0.999885054	FALSE
2620	PF3D7_1444200.2o3_7543	-0.774317342	-0.743707513	0.203738385	0.030609829	0.373634119	0.999885054	FALSE
373	PF3D7_0405300.iso1.exon1.amp1_1116	0.847159705	0.92851397	0.203714333	0.081354265	0.37368935	0.999885054	FALSE
1403	PF3D7_1013100.2o2_4787	-0.322604161	-0.289125023	0.203618186	0.033479139	0.37391019	0.999885054	FALSE
1621	PF3D7_1114500.iso1.exon1.amp1_3323	-0.548177777	-0.482016166	0.203542524	0.066161612	0.374084038	0.999885054	FALSE
1448	PF3D7_1019500.1.9o25_6465	-0.6863356	-0.71375296	0.20337377	-0.02741736	0.374471978	0.999885054	FALSE
607	PF3D7_0523100.e2s1_7775	-0.61602926	-0.588175536	0.203154465	0.027853724	0.37497653	0.999885054	FALSE
1700	PF3D7_1129200.2o4_7594	-0.547401724	-0.510789355	0.202953345	0.036612369	0.375439643	0.999885054	FALSE
815	PF3D7_0702500.e1s1_8598	-0.577139696	-0.613780073	0.202860067	-0.036640377	0.37565456	0.999885054	FALSE
376	PF3D7_0405400.e2s4_7512	-0.617941914	-0.497874058	0.202783264	0.120067856	0.375831579	0.999885054	FALSE
92	PF3D7_0201000.iso1.exon1.amp1_3595	0.076871064	0.028781779	0.202700988	-0.048089285	0.376021275	0.999885054	FALSE
1318	PF3D7_0934300.1o1_7830	-0.519407891	-0.469496135	0.202652476	0.049911756	0.376133155	0.999885054	FALSE
792	PF3D7_0632200.iso1.exon1.amp1_3015	0.745430573	0.803248109	0.202561621	0.057817536	0.376342747	0.999885054	FALSE
583	PF3D7_0518600.iso1.exon1.amp2_1924	-0.594691355	-0.492604738	0.202549907	0.102086617	0.376369775	0.999885054	FALSE
1137	PF3D7_0830800.iso1.exon2.amp1_1892	-0.145340838	-0.086362389	0.20251485	0.058978449	0.376450673	0.999885054	FALSE
799	PF3D7_0632700.iso1.exon2.amp1_2437	0.774169649	0.844888154	0.202438071	0.070718504	0.376627886	0.999885054	FALSE
2689	PF3D7_1457000.9o9_9045	-0.616682057	-0.567476348	0.201617859	0.049205709	0.378524499	0.999885054	FALSE
1922	PF3D7_1227300.e1s2_8357	-0.628897783	-0.674216995	0.201490121	-0.045319212	0.378820445	0.999885054	FALSE
2537	PF3D7_1431900.1o10_7008	-0.471576236	-0.433759755	0.201417	0.037816481	0.37898992	0.999885054	FALSE
418	PF3D7_0414000.e2s1_8062	-0.412579996	-0.377406472	0.200950279	0.035173524	0.380072855	0.999885054	FALSE
592	PF3D7_0519900.1o1_7902	-1.079049187	-1.011600473	0.200788576	0.067448713	0.380448534	0.999885054	FALSE
2217	PF3D7_1330300.iso1.exon4.amp1_90	-0.433967388	-0.405679065	0.200712321	0.028288323	0.380625779	0.999885054	FALSE
1272	PF3D7_0922500_7709	-0.556042648	-0.50790089	0.20044025	0.048141758	0.381258625	0.999885054	FALSE
1069	PF3D7_0812900.2o2_8824	-0.47357763	-0.434500902	0.199942759	0.039076728	0.382417605	0.999885054	FALSE
115	PF3D7_0204100.iso1.exon1.amp3_476	-0.0885917	-0.138058438	0.19984499	-0.049466738	0.382645647	0.999885054	FALSE
1883	PF3D7_1219100.e1s1_9152	-0.573436195	-0.521864906	0.199673953	0.051571289	0.383044801	0.999885054	FALSE
2255	PF3D7_1338100.iso1.exon2.amp1_2111	-0.629351232	-0.591875851	0.199602191	0.037475381	0.383212354	0.999885054	FALSE
2796	PF3D7_1478800.2o2_7548	-0.311738637	-0.260607551	0.199529501	0.051131087	0.383382126	0.999885054	FALSE
937	PF3D7_0726200.iso1.exon2.amp1_1023	-0.344243303	-0.286369999	0.199222648	0.057873304	0.384099343	0.999885054	FALSE
307	PF3D7_0317700.e9s1_9185	-0.309184186	-0.26789168	0.199033019	0.041292506	0.384543012	0.999885054	FALSE
2418	PF3D7_1404700.1o1_8732	-0.707606077	-0.675973034	0.198937494	0.031633043	0.384766637	0.999885054	FALSE
1001	PF3D7_0801800_4835	-0.803160236	-0.749956645	0.198766441	0.053203591	0.385167291	0.999885054	FALSE
2381	PF3D7_1367900.1o1_5591	-0.301942374	-0.242677964	0.198759826	0.059264409	0.38518279	0.999885054	FALSE
2113	PF3D7_1308400.e4s1_8949	-0.095605244	-0.136508665	0.198650405	-0.040903421	0.385439234	0.999885054	FALSE
2201	PF3D7_1327500.iso1.exon3.amp1_2160	-0.317574588	-0.237894601	0.198221665	0.079679988	0.386445136	0.999885054	FALSE
889	PF3D7_0716300.e1s1_8921	1.07780836	1.162854157	0.198032973	0.085045797	0.386888391	0.999885054	FALSE
897	PF3D7_0718000.e5s1_8036	-0.750689954	-0.712957985	0.197689574	0.037731969	0.387695926	0.999885054	FALSE
1266	PF3D7_0920900.iso1.exon2.amp1_3864	-0.396453886	-0.440958171	0.197579511	-0.044504285	0.387954982	0.999885054	FALSE
603	PF3D7_0522400.e3s3_9155	-0.439190425	-0.378931561	0.197470308	0.060258863	0.388212129	0.999885054	FALSE
1542	PF3D7_1040100.iso1.exon2.amp1_3299	1.213961441	1.282755945	0.19709578	0.068794504	0.389094903	0.999885054	FALSE
16	PF3D7_0101800.iso1.exon1.amp1_2719	0.644788762	0.714534498	0.197057065	0.069745736	0.38918623	0.999885054	FALSE
66	PF3D7_0112100.1o1_6684	0.230606606	0.266343104	0.196891004	0.035736498	0.389578124	0.999885054	FALSE
589	PF3D7_0519100.iso1.exon1.amp1_673	-0.47212961	-0.438518368	0.19665986	0.033611243	0.390124041	0.999885054	FALSE
659	PF3D7_0601500.iso1.exon1.amp1_4480	-0.058505391	-0.025937527	0.196651583	0.032567864	0.390143598	0.999885054	FALSE
1768	PF3D7_1142900.e2_6836	-0.426391298	-0.379115789	0.196566182	0.04727551	0.390345432	0.999885054	FALSE
2802	PF3D7_1479900.iso1.exon2.amp1_2142	0.551213967	0.639064442	0.196431903	0.087850475	0.390662921	0.999885054	FALSE
36	PF3D7_0106200.iso1.exon1.amp1_3577	-0.343252177	-0.393704178	0.196392836	-0.050452001	0.390755324	0.999885054	FALSE
134	PF3D7_0207400.4o4_5635	-0.597214132	-0.566031908	0.195974405	0.031182224	0.391745903	0.999885054	FALSE
940	PF3D7_0726400.e2s1_8610	-0.5313927	-0.498136783	0.19579782	0.033255917	0.392164438	0.999885054	FALSE
407	PF3D7_0411900.iso1.exon1.amp1_724	-0.679036457	-0.709982006	0.195623642	-0.030945548	0.392577554	0.999885054	FALSE
701	PF3D7_0611800.iso1.exon5.amp3_508	-0.07612059	0.038043097	0.195418869	0.114163687	0.393063601	0.999885054	FALSE
2034	PF3D7_1252100.e7s1_6035	-0.367439108	-0.263031414	0.195356143	0.104407694	0.393212567	0.999885054	FALSE
621	PF3D7_0525200.iso1.exon1.amp2_3987	-0.500688141	-0.538959027	0.195269868	-0.038270885	0.393417517	0.999885054	FALSE
2718	PF3D7_1464900.iso1.exon1.amp1_3045	-0.211123685	-0.14934811	0.195246104	0.061775574	0.39347398	0.999885054	FALSE
2597	PF3D7_1440800.1o3_7624	-0.562701239	-0.541047251	0.194789638	0.021653988	0.394559601	0.999885054	FALSE
203	PF3D7_0223200.iso1.exon2.amp1_3607	0.20368153	0.130063042	0.193980439	-0.073618487	0.396488936	0.999885054	FALSE
2730	PF3D7_1466300.e1s1_4805	-0.553709932	-0.511654016	0.193691517	0.042055916	0.397179289	0.999885054	FALSE
2080	PF3D7_1302100.e1s1_8333	-0.254388955	-0.297195701	0.193361428	-0.042806746	0.397968963	0.999885054	FALSE
890	PF3D7_0717000.iso1.exon2.amp1_1484	-0.538517143	-0.562663015	0.193347815	-0.024145871	0.398001553	0.999885054	FALSE
563	PF3D7_0513200.e2s3_5488	-0.34253252	-0.303018687	0.193268972	0.039513833	0.39819033	0.999885054	FALSE
2678	PF3D7_1454900.1o1_8129	-0.229329496	-0.283941983	0.193241167	-0.054612486	0.39825692	0.999885054	FALSE
2563	PF3D7_1435700.iso2.exon2.amp1_409	-0.197706838	-0.235688897	0.193184996	-0.037982058	0.398391461	0.999885054	FALSE
1029	PF3D7_0806300.iso1.exon2.amp1_3830	-0.325843837	-0.205054137	0.193071662	0.1207897	0.398663015	0.999885054	FALSE
1730	PF3D7_1135100.1o1_6774	-0.380880647	-0.325631228	0.193005458	0.055249419	0.398821697	0.999885054	FALSE
1124	PF3D7_0827600.2o2_6223	1.340718349	1.441176273	0.192991496	0.100457924	0.398855169	0.999885054	FALSE
839	PF3D7_0707300.2o5_6209	-0.631823143	-0.613941225	0.19298718	0.017881918	0.398865515	0.999885054	FALSE
683	PF3D7_0606600.iso1.exon2.amp1_2254	-0.720990293	-0.676183536	0.192501129	0.044806757	0.400031865	0.999885054	FALSE
2105	PF3D7_1306400_8871	-0.382871009	-0.294054932	0.192421696	0.088816077	0.400222686	0.999885054	FALSE
333	PF3D7_0323800.e2s1_7381	-0.254293035	-0.204557156	0.192418453	0.049735879	0.400230476	0.999885054	FALSE
1045	PF3D7_0808400.1o1_4673	-0.691179624	-0.655020625	0.192318933	0.036158999	0.400469639	0.999885054	FALSE
2006	PF3D7_1244400.iso1.exon1.amp2_1954	-0.007539714	0.022438222	0.192292949	0.029977937	0.400532099	0.999885054	FALSE
2289	PF3D7_1347700.1o3_5607	-0.461480669	-0.428569939	0.192279107	0.03291073	0.400565374	0.999885054	FALSE
218	PF3D7_0301300.2o2_5567	-0.62767059	-0.597530205	0.192270651	0.030140386	0.400585702	0.999885054	FALSE
2037	PF3D7_1252400.e2s1_6613	-0.159918665	-0.12401132	0.192260549	0.035907345	0.40060999	0.999885054	FALSE
1474	PF3D7_1023100.e1s6_5941	0.042420113	0.129841537	0.191653946	0.087421424	0.402070091	0.999885054	FALSE
2736	PF3D7_1467200.1o1_5897	-0.505931181	-0.462315843	0.19163682	0.043615338	0.402111364	0.999885054	FALSE
2520	PF3D7_1427000_7147	-0.669739026	-0.629632162	0.190893491	0.040106865	0.403905382	0.999885054	FALSE
1908	PF3D7_1223600.e2s1_8263	-0.620198319	-0.539503214	0.190614709	0.080695105	0.404579552	0.999885054	FALSE
269	PF3D7_0310500.e1s3_8946	-0.387075589	-0.429935001	0.190456851	-0.042859412	0.404961619	0.999885054	FALSE
448	PF3D7_0420300.iso1.exon1.amp1_521	-0.434343863	-0.406548616	0.190370119	0.027795247	0.405171638	0.999885054	FALSE
2700	PF3D7_1459600.iso1.exon1.amp1_3337	-0.375358302	-0.197015746	0.190222435	0.178342556	0.405529408	0.999885054	FALSE
2449	PF3D7_1408700.e3s2_7786	-0.768921403	-0.718726718	0.190214375	0.050194685	0.405548941	0.999885054	FALSE
1652	PF3D7_1121600.iso1.exon2.amp1_2679	0.079791629	0.198636249	0.190132306	0.118844621	0.405747851	0.999885054	FALSE
136	PF3D7_0207500.e3s1_8088	0.171079495	0.30109736	0.190081054	0.130017865	0.405872103	0.999885054	FALSE
1404	PF3D7_1013200.iso1.exon1.amp1_4310	-0.464651425	-0.410400015	0.189909814	0.054251409	0.406287424	0.999885054	FALSE
1018	PF3D7_0804500.e3_7398	-0.709052003	-0.646559895	0.189619371	0.062492108	0.40699248	0.999885054	FALSE
2626	PF3D7_1446500.iso1.exon1.amp1_528	-0.251616217	-0.279267378	0.189263478	-0.027651161	0.407857495	0.999885054	FALSE
2747	PF3D7_1469500.iso1.exon1.amp1_4484	-0.540697562	-0.447922735	0.189112753	0.092774827	0.408224193	0.999885054	FALSE
695	PF3D7_0609000.iso1.exon1.amp2_4274	0.87353535	0.79126555	0.188905259	-0.0822698	0.408729354	0.999885054	FALSE
999	PF3D7_0801600.1o1_8124	-0.417161028	-0.456266584	0.188898627	-0.039105556	0.408745508	0.999885054	FALSE
1037	PF3D7_0806900.iso1.exon1.amp1_704	-0.580110927	-0.52404507	0.188867437	0.056065857	0.408821479	0.999885054	FALSE
894	PF3D7_0717700.e1s1_9221	-0.586305251	-0.542348803	0.188577266	0.043956447	0.4095287	0.999885054	FALSE
1105	PF3D7_0824200.iso1.exon2.amp2_seg1_3463	0.002678667	0.029481744	0.188304003	0.026803077	0.410195431	0.999885054	FALSE
2019	PF3D7_1247800.e6s1_7478	-1.233228485	-1.186857913	0.188198785	0.046370573	0.410452336	0.999885054	FALSE
400	PF3D7_0409900.7o7_7316	-0.542481219	-0.514925645	0.188098798	0.027555574	0.410696565	0.999885054	FALSE
736	PF3D7_0620600.1o1_5842	-0.160904688	-0.129099318	0.187890758	0.03180537	0.411205026	0.999885054	FALSE
1321	PF3D7_0935800.e2_5959	-0.643884885	-0.57804187	0.187803731	0.065843014	0.411417844	0.999885054	FALSE
213	PF3D7_0300700.iso1.exon2.amp1_3592	1.079785654	1.015100097	0.187452568	-0.064685556	0.412277301	0.999885054	FALSE
828	PF3D7_0704800.iso1.exon1.amp1_3430	-0.045679272	0.09138826	0.187417262	0.137067532	0.412363776	0.999885054	FALSE
2119	PF3D7_1309500.iso1.exon1.amp1_400	-0.989223091	-1.023053409	0.187388406	-0.033830319	0.412434459	0.999885054	FALSE
1705	PF3D7_1130200_5980	0.839313784	0.987049869	0.187359541	0.147736085	0.412505175	0.999885054	FALSE
1430	PF3D7_1016700.iso1.exon2.amp1_3820	-0.486346047	-0.523357627	0.18728099	-0.03701158	0.412697651	0.999885054	FALSE
1380	PF3D7_1008800.e1s1_8915	-0.905971917	-0.934784429	0.18674459	-0.028812512	0.414013545	0.999885054	FALSE
1073	PF3D7_0814600.e1s1_5462	-0.521931376	-0.472045624	0.186671246	0.049885752	0.414193681	0.999885054	FALSE
2478	PF3D7_1416500.e1s1_9204	-0.588289554	-0.543310398	0.186605726	0.044979157	0.414354644	0.999885054	FALSE
1990	PF3D7_1240300.iso1.exon1.amp2_2520	-0.129485805	-0.079807027	0.186211674	0.049678778	0.415323547	0.999885054	FALSE
2748	PF3D7_1469600.e1s1_5128	-0.193241724	-0.137649982	0.186182158	0.055591742	0.415396181	0.999885054	FALSE
47	PF3D7_0108700.e1s1_7776	-0.170461292	-0.137747303	0.185915291	0.03271399	0.416053253	0.999885054	FALSE
1526	PF3D7_1036900.e2s1_6576	-0.689738893	-0.66909263	0.185888672	0.020646263	0.416118829	0.999885054	FALSE
2366	PF3D7_1364200.e1s2_7430	0.018679353	0.067115906	0.185537459	0.048436552	0.416984675	0.999885054	FALSE
144	PF3D7_0208700.iso2.exon4.amp1_1767	-0.479014351	-0.503726047	0.185370283	-0.024711696	0.417397215	0.999885054	FALSE
545	PF3D7_0509900.iso1.exon1.amp1_3597	0.180804322	0.22413698	0.185300245	0.043332657	0.417570126	0.999885054	FALSE
108	PF3D7_0203100.e1s1_6609	-0.311501303	-0.34840997	0.185293108	-0.036908667	0.417587748	0.999885054	FALSE
918	PF3D7_0721100_5690	0.015183164	0.091618332	0.185082608	0.076435168	0.418107721	0.999885054	FALSE
1185	PF3D7_0903500.e1s1_7220	1.532360579	1.627995748	0.184845897	0.09563517	0.418692931	0.999885054	FALSE
2668	PF3D7_1453500.iso1.exon3.amp1_2253	-0.193203147	-0.139295313	0.184706219	0.053907834	0.419038497	0.999885054	FALSE
2614	PF3D7_1444000.iso1.exon4.amp1_1516	-0.500940249	-0.530599368	0.184669355	-0.029659119	0.419129728	0.999885054	FALSE
1428	PF3D7_1016500.e1s1_7472	-0.134316407	-0.092377592	0.184559065	0.041938815	0.419402751	0.999885054	FALSE
883	PF3D7_0714200.iso1.exon1.amp2_463	-0.2039117	-0.158647003	0.183262052	0.045264697	0.422621993	0.999885054	FALSE
560	PF3D7_0512900.iso1.exon1.amp1_3002	-0.515706258	-0.478687397	0.183153531	0.037018861	0.422892054	0.999885054	FALSE
1348	PF3D7_1001500.1o1_6967	0.451715179	0.599718831	0.18306986	0.148003653	0.423100349	0.999885054	FALSE
2293	PF3D7_1348200.iso1.exon2.amp1_976	-0.152582303	-0.085550445	0.183000618	0.067031858	0.423272772	0.999885054	FALSE
504	PF3D7_0503000.5o5_8733	-0.702550338	-0.744777526	0.182367778	-0.042227188	0.424850705	0.999885054	FALSE
275	PF3D7_0311400.iso1.exon2.amp1_782	0.766220294	0.869168769	0.182344015	0.102948476	0.424910028	0.999885054	FALSE
1203	PF3D7_0906400.e1s1_9120	-0.804415812	-0.766051219	0.182332303	0.038364593	0.424939267	0.999885054	FALSE
1446	PF3D7_1019400.e2s1_9178	-0.533481075	-0.503497494	0.182300697	0.029983581	0.425018182	0.999885054	FALSE
2319	PF3D7_1353300.iso1.exon1.amp2_237	0.765164691	0.865148756	0.182144862	0.099984065	0.42540741	0.999885054	FALSE
1085	PF3D7_0817700.iso1.exon14.amp1_1790	-0.882546137	-0.922116062	0.18206014	-0.039569925	0.425619113	0.999885054	FALSE
2430	PF3D7_1406300.1o1_8470	-0.100965317	-0.034779967	0.181954479	0.06618535	0.425883232	0.999885054	FALSE
1339	PF3D7_0937700.iso1.exon2.amp1_713	0.934038713	0.999427138	0.181733924	0.065388425	0.42643488	0.999885054	FALSE
1710	PF3D7_1131800.iso1.exon1.amp1_838	-0.667616451	-0.69213386	0.181471447	-0.024517409	0.427091974	0.999885054	FALSE
2495	PF3D7_1419200.e1s1_5171	-0.095013326	-0.165236095	0.181235836	-0.070222769	0.42768235	0.999885054	FALSE
249	PF3D7_0305600.1o1_7038	-0.09243219	0.016337204	0.181234344	0.108769394	0.427686091	0.999885054	FALSE
1614	PF3D7_1112100.iso1.exon1.amp3_2210	-0.576318103	-0.544913618	0.181144962	0.031404484	0.427910192	0.999885054	FALSE
548	PF3D7_0510400.1o1_8464	0.650541126	0.587143994	0.180776319	-0.063397132	0.428835251	0.999885054	FALSE
2190	PF3D7_1324900.e1s1_8345	-0.18627473	-0.141360625	0.180489816	0.044914105	0.429555057	0.999885054	FALSE
803	PF3D7_0700300.iso1.exon3.amp1_3589	-0.312798343	-0.372928425	0.180380877	-0.060130082	0.429828953	0.999885054	FALSE
132	PF3D7_0207300.iso1.exon2.amp1_4172	-0.342377225	-0.285431438	0.18016162	0.056945787	0.430380544	0.999885054	FALSE
527	PF3D7_0507300 (plasmodb revised)_5405	-0.207175085	-0.159835237	0.180086531	0.047339848	0.430569549	0.999885054	FALSE
59	PF3D7_0111000.e1s2_6049	-0.478514096	-0.3568931	0.180022301	0.121620996	0.430731264	0.999885054	FALSE
2692	PF3D7_1457900.e1s4_7439	-0.615266074	-0.566755419	0.179995883	0.048510655	0.430797788	0.999885054	FALSE
2223	PF3D7_1331100.iso1.exon4.amp1_4106	-0.584420502	-0.611444742	0.179953469	-0.027024239	0.430904606	0.999885054	FALSE
2360	PF3D7_1361800.e2s1_4832	-0.604726518	-0.584561127	0.179937115	0.020165391	0.430945797	0.999885054	FALSE
2198	PF3D7_1327000.iso1.exon3.amp2_2804	-0.621671486	-0.538637281	0.179785514	0.083034206	0.431327759	0.999885054	FALSE
1554	PF3D7_1041300.iso1.exon2.amp1_498	-0.158359614	-0.216379381	0.179524942	-0.058019767	0.431984768	0.999885054	FALSE
2210	PF3D7_1329100.e3s3_9237	-0.203480045	-0.148723865	0.179441911	0.05475618	0.432194254	0.999885054	FALSE
965	PF3D7_0730300.e1s2_5758	-0.324792334	-0.2373569	0.179244578	0.087435434	0.432692382	0.999885054	FALSE
1017	PF3D7_0804500.e2s3_4800	-0.637545009	-0.611738495	0.179124649	0.025806514	0.432995291	0.999885054	FALSE
2481	PF3D7_1417000.1o1_5276	-0.501276246	-0.458276252	0.178868461	0.042999995	0.433642802	0.999885054	FALSE
2108	PF3D7_1307200.1o1_6122	-0.459606067	-0.502236816	0.178629237	-0.042630749	0.434247984	0.999885054	FALSE
2742	PF3D7_1468100.e2s2_5699	-0.290649848	-0.250889089	0.178622843	0.039760759	0.434264167	0.999885054	FALSE
1719	PF3D7_1133900.iso1.exon2.amp2_3355	-0.778996428	-0.724945566	0.178278989	0.054050862	0.43513498	0.999885054	FALSE
528	PF3D7_0507700.e1s1_5454	-0.504187797	-0.466723248	0.178178802	0.037464549	0.43538891	0.999885054	FALSE
1793	PF3D7_1149100.iso2.exon2.amp1_3610	-0.544140061	-0.573995227	0.178148763	-0.029855166	0.435465064	0.999885054	FALSE
2200	PF3D7_1327300.e1s2_5693	-0.848576032	-0.815022721	0.178136671	0.033553311	0.435495721	0.999885054	FALSE
811	PF3D7_0702200.1o1_5873	-0.228805319	-0.187453827	0.178073666	0.041351491	0.435655482	0.999885054	FALSE
2575	PF3D7_1437900.e2s1_9220	-0.62809917	-0.59471525	0.177818755	0.03338392	0.436302229	0.999885054	FALSE
2277	PF3D7_1346000.e1s1_9226	-0.449546727	-0.403131699	0.177611201	0.046415028	0.436829268	0.999885054	FALSE
711	PF3D7_0615600.5o8_7086	-0.495920399	-0.461308401	0.177537847	0.034611999	0.437015629	0.999885054	FALSE
1201	PF3D7_0906200.1o1_7631	-0.408228846	-0.482787689	0.177085545	-0.074558843	0.438165827	0.999885054	FALSE
191	PF3D7_0220100.e2s1_7661	0.138540038	0.19676792	0.176509229	0.058227882	0.439634116	0.999885054	FALSE
1694	PF3D7_1128100.2o3_7845	-0.331085787	-0.209758009	0.176437879	0.121327778	0.439816107	0.999885054	FALSE
1420	PF3D7_1014900.iso1.exon1.amp1_3710	-0.378500443	-0.335340296	0.176127179	0.043160147	0.440609148	0.999885054	FALSE
427	PF3D7_0416400.iso1.exon2.amp1_1080	-0.221394231	-0.169192826	0.175995264	0.052201406	0.440946121	0.999885054	FALSE
882	PF3D7_0714000.e1s1_6579	-0.642865459	-0.62695443	0.17588198	0.015911028	0.441235628	0.999885054	FALSE
1644	PF3D7_1119500.iso1.exon3.amp1_3827	-0.096976239	-0.128932673	0.175868575	-0.031956433	0.441269893	0.999885054	FALSE
1286	PF3D7_0926500.iso1.exon1.amp2_2495	-0.210536639	-0.172355514	0.17584638	0.038181125	0.441326632	0.999885054	FALSE
1307	PF3D7_0931400.3o4_4980	-0.136034765	-0.090166541	0.175541985	0.045868224	0.442105221	0.999885054	FALSE
1950	PF3D7_1233200.iso2.exon1.amp1_3096	-0.771874466	-0.732019377	0.17545176	0.039855089	0.442336166	0.999885054	FALSE
720	PF3D7_0618500.1o1_6121	-0.743969619	-0.763271448	0.174926482	-0.019301829	0.443682166	0.999885054	FALSE
2763	PF3D7_1472200.e1s2_8556	-0.40022542	-0.472406353	0.174909654	-0.072180933	0.44372533	0.999885054	FALSE
1561	PF3D7_1100300.iso1.exon2.amp1_4474	0.638427942	0.718808668	0.174873405	0.080380726	0.443818315	0.999885054	FALSE
1353	PF3D7_1002500.1o3_8986	0.470088122	0.563312063	0.174690446	0.093223941	0.444287821	0.999885054	FALSE
702	PF3D7_0611900.iso1.exon1.amp1_2690	-0.411711557	-0.387111706	0.174679503	0.024599852	0.444315913	0.999885054	FALSE
1441	PF3D7_1018300.e1s1_5945	-0.384905107	-0.312310525	0.17463394	0.072594582	0.444432886	0.999885054	FALSE
1186	PF3D7_0903500.e1s2_7214	0.944048315	1.084187088	0.174555369	0.140138773	0.444634648	0.999885054	FALSE
1724	PF3D7_1134300.iso1.exon1.amp3_4228	-0.435730826	-0.400150218	0.174465151	0.035580609	0.444866389	0.999885054	FALSE
238	PF3D7_0303200.e2s1_6620	-0.410099222	-0.446581862	0.174432249	-0.03648264	0.444950923	0.999885054	FALSE
1332	PF3D7_0937000.2o2_6410	-0.602739183	-0.563180154	0.173949995	0.039559029	0.446191079	0.999885054	FALSE
1032	PF3D7_0806600.e3s1_8038	-0.220974093	-0.144629343	0.173709445	0.07634475	0.446810469	0.999885054	FALSE
775	PF3D7_0628600.iso1.exon3.amp1_4371	-0.625587786	-0.649387171	0.173573623	-0.023799385	0.447160428	0.999885054	FALSE
1309	PF3D7_0931700.2o3_7353	-0.464812819	-0.384484234	0.173391998	0.080328585	0.447628665	0.999885054	FALSE
2	MAL8P1.143_14o15_5934	0.108442869	0.191187758	0.173284493	0.082744889	0.447905961	0.999885054	FALSE
2022	PF3D7_1248200.iso1.exon1.amp1_4177	-0.607045412	-0.535627244	0.173032833	0.071418168	0.4485555	0.999885054	FALSE
1959	PF3D7_1234300.2o2_6755	-0.291378661	-0.222000661	0.173001213	0.069377999	0.448637152	0.999885054	FALSE
2262	PF3D7_1341500.1o1_8190	-0.579159972	-0.611545371	0.172984102	-0.032385399	0.448681342	0.999885054	FALSE
1182	PF3D7_0903300.iso1.exon1.amp3_3123	-0.607569616	-0.584469662	0.172967425	0.023099954	0.448724411	0.999885054	FALSE
1912	PF3D7_1224200.1o5_7077	-0.410249153	-0.366669019	0.172890122	0.043580134	0.448924095	0.999885054	FALSE
1447	PF3D7_1019500.1.6o25_6176	-0.07836767	-0.009927459	0.172545491	0.068440211	0.449814977	0.999885054	FALSE
2234	PF3D7_1333800.e1s1_6310	-0.411546751	-0.45823761	0.172484358	-0.046690859	0.449973119	0.999885054	FALSE
1656	PF3D7_1122500.iso1.exon1.amp1_3721	-0.53679752	-0.499083819	0.172223861	0.037713701	0.450647374	0.999885054	FALSE
363	PF3D7_0403500.1o1_6443	-0.381838875	-0.34961476	0.171911064	0.032224115	0.451457817	0.999885054	FALSE
1789	PF3D7_1149000.e1s1_5748	-0.239329808	-0.198922156	0.171704645	0.040407652	0.451993127	0.999885054	FALSE
2167	PF3D7_1320800.e3_5963	-0.37905665	-0.344029448	0.171301272	0.035027202	0.453040321	0.999885054	FALSE
1385	PF3D7_1010200.iso1.exon1.amp2_1917	-0.529663369	-0.499908826	0.171261056	0.029754542	0.453144806	0.999885054	FALSE
79	PF3D7_0115200.iso1.exon2.amp1_719	0.364614269	0.410896921	0.171254906	0.046282652	0.453160784	0.999885054	FALSE
2174	PF3D7_1321800.1o4_7280	2.004024009	2.095310555	0.171070237	0.091286546	0.453640772	0.999885054	FALSE
2089	PF3D7_1303300.1o1_7567	-0.644602531	-0.597987286	0.171037856	0.046615245	0.453724968	0.999885054	FALSE
2691	PF3D7_1457500.1o1_7890	-0.746175342	-0.69517711	0.170965947	0.050998233	0.453911978	0.999885054	FALSE
264	PF3D7_0310200.e1s3_7089	-0.619340044	-0.555649174	0.170558804	0.06369087	0.454971697	0.999885054	FALSE
1177	PF3D7_0902800.2o4_7652	-0.411860324	-0.212872626	0.170441249	0.198987699	0.45527795	0.999885054	FALSE
2135	PF3D7_1313500.1o2_5356	-0.73587977	-0.678288648	0.170339271	0.057591122	0.455543727	0.999885054	FALSE
1547	PF3D7_1040600.iso1.exon2.amp1_2150	-0.053034191	-0.142096574	0.170231567	-0.089062383	0.455824525	0.999885054	FALSE
1937	PF3D7_1230000.iso1.exon6.amp1_333	-0.528828462	-0.489989234	0.170125365	0.038839228	0.456101512	0.999885054	FALSE
859	PF3D7_0710400_9160	0.105322001	0.153195533	0.17010425	0.047873532	0.456156596	0.999885054	FALSE
706	PF3D7_0613900.iso1.exon1.amp2_2265	-0.531003213	-0.459811872	0.169896258	0.071191341	0.456699398	0.999885054	FALSE
970	PF3D7_0730900.e2s1_8659	-0.479644289	-0.510573041	0.169808684	-0.030928753	0.456928062	0.999885054	FALSE
1903	PF3D7_1222600.e1s1_5687	-0.332999478	-0.297575231	0.169776767	0.035424247	0.457011415	0.999885054	FALSE
2434	PF3D7_1406500.iso1.exon2.amp2_3686	-0.216895134	-0.16881804	0.16956666	0.048077094	0.457560363	0.999885054	FALSE
2524	PF3D7_1427700.iso1.exon1.amp1_1501	-0.306705606	-0.343150098	0.16951905	-0.036444492	0.457684811	0.999885054	FALSE
416	PF3D7_0413200.iso1.exon1.amp1_2147	-0.306828583	-0.27519887	0.169450266	0.031629713	0.457864639	0.999885054	FALSE
2612	PF3D7_1443600.iso1.exon1.amp2_3362	-0.399536966	-0.360547969	0.169287508	0.038988997	0.458290324	0.999885054	FALSE
2437	PF3D7_1407800.e1s1_6313	-0.407048879	-0.35809491	0.169234691	0.048953969	0.458428516	0.999885054	FALSE
484	PF3D7_0500500.iso1.exon1.amp1_2721	1.105576403	1.173031549	0.169002141	0.067455146	0.459037266	0.999885054	FALSE
1049	PF3D7_0808700.iso1.exon2.amp1_2238	-0.596424782	-0.575033902	0.168938106	0.021390881	0.459204977	0.999885054	FALSE
295	PF3D7_0315900.2o2_5837	-0.423844209	-0.366112701	0.168906558	0.057731508	0.459287617	0.999885054	FALSE
2386	PF3D7_1368800.e1s1_7433	-0.423664637	-0.333471312	0.168865963	0.090193325	0.459393969	0.999885054	FALSE
2175	PF3D7_1321900.1o1_6998	-0.220829818	-0.190334217	0.168855291	0.030495601	0.459421928	0.999885054	FALSE
2389	PF3D7_1371900.2o2_6112	-0.277965414	-0.359435038	0.168814146	-0.081469624	0.459529742	0.999885054	FALSE
1365	PF3D7_1005700.iso1.exon2.amp1_3583	-0.277022457	-0.303997929	0.168653443	-0.026975472	0.459950975	0.999885054	FALSE
422	PF3D7_0415100.iso1.exon1.amp1_2166	-0.233964754	-0.19623936	0.168430727	0.037725394	0.460535143	0.999885054	FALSE
2804	PFD0175c_1o1_8408	-1.249751466	-1.344832606	0.168295202	-0.09508114	0.460890835	0.999885054	FALSE
1407	PF3D7_1013700.iso1.exon1.amp1_3828	-0.226481673	-0.196829505	0.168252177	0.029652168	0.461003791	0.999885054	FALSE
1590	PF3D7_1106700.iso1.exon1.amp2_772	-0.644786869	-0.621322505	0.168202453	0.023464364	0.461134353	0.999885054	FALSE
825	PF3D7_0704300.s1_6860	-0.646564884	-0.623780699	0.168133834	0.022784184	0.461314568	0.999885054	FALSE
2350	PF3D7_1359800.iso1.exon3.amp1_672	0.062226318	0.132081002	0.168125375	0.069854684	0.461336788	0.999885054	FALSE
685	PF3D7_0606800.1o1_4981	0.536249887	0.576682183	0.168082229	0.040432296	0.461450128	0.999885054	FALSE
1952	PF3D7_1233200.iso2.exon1.amp3_seg1_1729	-0.245786143	-0.202279305	0.168064939	0.043506838	0.461495552	0.999885054	FALSE
2649	PF3D7_1450000.iso1.exon5.amp1_1533	-0.418345947	-0.445688518	0.167972955	-0.027342571	0.461737252	0.999885054	FALSE
1206	PF3D7_0907200.e1s2_8934	-0.283328395	-0.210056954	0.167908355	0.073271441	0.461907045	0.999885054	FALSE
1940	PF3D7_1230700.1o1_6777	-0.284044816	-0.254076576	0.167713936	0.02996824	0.462418274	0.999885054	FALSE
1392	PF3D7_1011900.iso1.exon4.amp1_2357	-0.536409044	-0.505785062	0.167666552	0.030623982	0.462542923	0.999885054	FALSE
493	PF3D7_0501200.e2_7703	-0.276217777	-0.239086665	0.167601859	0.037131112	0.462713139	0.999885054	FALSE
658	PF3D7_0601200.iso1.exon2.amp1_695	0.448222502	0.533259701	0.167404307	0.085037198	0.463233157	0.999885054	FALSE
1454	PF3D7_1020700.e1s2_8363	-0.310425464	-0.264187922	0.167326783	0.046237542	0.46343732	0.999885054	FALSE
457	PF3D7_0422000.5o5_7285	-0.191990937	-0.165538915	0.167291748	0.026452022	0.463529603	0.999885054	FALSE
77	PF3D7_0114100.iso1.exon1.amp1_2718	-0.096680836	-0.026776364	0.167248223	0.069904471	0.463644266	0.999885054	FALSE
327	PF3D7_0321600.e1_7117	-0.57097286	-0.543314862	0.167207846	0.027657998	0.46375065	0.999885054	FALSE
2330	PF3D7_1356300 (renamed)_6720	-0.574689739	-0.501523581	0.167073587	0.073166158	0.4641045	0.999885054	FALSE
1729	PF3D7_1134700.e2s2_6835	0.629842877	0.699763929	0.166847236	0.069921052	0.464701433	0.999885054	FALSE
690	PF3D7_0608100.iso1.exon1.amp2_2496	0.013521345	0.074392314	0.16673564	0.060870969	0.464995902	0.999885054	FALSE
1577	PF3D7_1103500.13o13_6965	-0.347014722	-0.295258768	0.166646762	0.051755954	0.465230508	0.999885054	FALSE
2508	PF3D7_1421000.iso1.exon2.amp1_3541	0.010863778	-0.02771318	0.166482494	-0.038576958	0.465664298	0.999885054	FALSE
54	PF3D7_0110500.e1s3_5188	-0.970291871	-0.913804701	0.166437346	0.05648717	0.465783568	0.999885054	FALSE
941	PF3D7_0726400.e2s2_9247	-0.281350767	-0.245719684	0.16638264	0.035631084	0.465928108	0.999885054	FALSE
2628	PF3D7_1446700.1o2_9003	-0.401194657	-0.292124789	0.166328271	0.109069868	0.466071786	0.999885054	FALSE
1800	PF3D7_1150200.iso1.exon1.amp1_412	0.452528856	0.483503379	0.166186449	0.030974523	0.466446697	0.999885054	FALSE
1233	PF3D7_0912600.iso1.exon2.amp1_4466	-1.017635335	-1.045569976	0.166081416	-0.027934641	0.466724469	0.999885054	FALSE
1938	PF3D7_1230400.5o5_7268	-0.361783739	-0.341300327	0.166026423	0.020483412	0.466869946	0.999885054	FALSE
1395	PF3D7_1012100.iso1.exon1.amp1_2444	-0.675626149	-0.641550424	0.166017791	0.034075725	0.466892783	0.999885054	FALSE
1790	PF3D7_1149000.s4 (renamed)_8579	-0.106535164	-0.202814879	0.165997372	-0.096279716	0.466946805	0.999885054	FALSE
1578	PF3D7_1103500.1o13_8994	-0.360213307	-0.262589764	0.165992891	0.097623543	0.466958662	0.999885054	FALSE
816	PF3D7_0702600.iso1.exon1.amp1_3842	-0.163350027	-0.227692205	0.165989732	-0.064342178	0.46696702	0.999885054	FALSE
1838	PF3D7_1207500.e3s1_6870	-0.600069031	-0.585492506	0.165959848	0.014576525	0.467046096	0.999885054	FALSE
1935	PF3D7_1230000.iso1.exon10.amp2_1646	-0.687822675	-0.637851589	0.165924772	0.049971086	0.467138919	0.999885054	FALSE
2584	PF3D7_1439100.e2s1_8922	-0.581153489	-0.547417737	0.165810617	0.033735752	0.467441091	0.999885054	FALSE
1712	PF3D7_1132900.1o1_6392	-0.256762293	-0.185292464	0.165778246	0.07146983	0.467526799	0.999885054	FALSE
48	PF3D7_0108800.iso1.exon6.amp1_1233	-0.074120568	-0.100048433	0.165533737	-0.025927866	0.468174484	0.999885054	FALSE
2634	PF3D7_1447500.2o2_6968	-1.09001736	-1.006888246	0.165491806	0.083129113	0.468285611	0.999885054	FALSE
1251	PF3D7_0917500.e1s1_7508	-0.628914444	-0.594369949	0.165483212	0.034544495	0.468308388	0.999885054	FALSE
1892	PF3D7_1220300.iso1.exon1.amp1_2695	-0.398892791	-0.367316915	0.165456394	0.031575877	0.468379472	0.999885054	FALSE
1750	PF3D7_1138400.e1s3_5106	0.051809757	0.12384751	0.165359558	0.072037753	0.468636198	0.999885054	FALSE
2336	PF3D7_1357300.1o1_4655	-0.899673232	-0.820128846	0.16491666	0.079544386	0.469811462	0.999885054	FALSE
2457	PF3D7_1410300.iso1.exon1.amp1_4407	-0.237687406	-0.214293458	0.164894779	0.023393948	0.469869568	0.999885054	FALSE
1734	PF3D7_1136200.5o5_9080	0.143527734	0.17175641	0.164812174	0.028228676	0.470088979	0.999885054	FALSE
593	PF3D7_0520000.e3s1_9191	-0.790127531	-0.748073858	0.164724779	0.042053674	0.470321177	0.999885054	FALSE
302	PF3D7_0317400.iso1.exon1.amp1_643	-0.369983616	-0.412398575	0.164686218	-0.042414959	0.470423651	0.999885054	FALSE
52	PF3D7_0110000.1o1_8428	-0.342930793	-0.252588534	0.164609565	0.090342259	0.470627392	0.999885054	FALSE
93	PF3D7_0201200.iso1.exon2.amp1_3603	0.667077873	0.74550573	0.164549597	0.078427857	0.470786822	0.999885054	FALSE
280	PF3D7_0311900.1o1_5052	-0.656440427	-0.617496781	0.164484871	0.038943646	0.470958936	0.999885054	FALSE
1797	PF3D7_1149500.e2_6825	-0.18727335	-0.143663128	0.164411598	0.043610222	0.471153825	0.999885054	FALSE
1757	PF3D7_1139300.e2s3_8649	1.034908076	1.096961457	0.16433784	0.062053381	0.471350051	0.999885054	FALSE
2636	PF3D7_1447800.e1s1_8304	-0.887508135	-0.91309758	0.164335458	-0.025589445	0.47135639	0.999885054	FALSE
1280	PF3D7_0924600.iso1.exon1.amp1_2177	0.890270926	0.973581787	0.163753263	0.083310861	0.47290699	0.999885054	FALSE
2509	PF3D7_1422700.e1s1_6918	-0.269396494	-0.209110179	0.163745299	0.060286315	0.472928222	0.999885054	FALSE
2030	PF3D7_1250700.iso1.exon2.amp1_3275	-0.210798039	-0.182020855	0.163694642	0.028777184	0.473063287	0.999885054	FALSE
1923	PF3D7_1227500.2o2_5357	-0.312155569	-0.336151037	0.163595583	-0.023995468	0.473327472	0.999885054	FALSE
511	PF3D7_0504600_5397	-0.237081006	-0.162626091	0.163136844	0.074454916	0.474552044	0.999885054	FALSE
1452	PF3D7_1020500.1o1_4727	-0.517252448	-0.492974985	0.163065166	0.024277464	0.474743552	0.999885054	FALSE
459	PF3D7_0422200.iso1.exon1.amp4_2550	-0.387276692	-0.342938566	0.163030714	0.044338126	0.474835617	0.999885054	FALSE
237	PF3D7_0302900.e1s2_5184	-0.548883764	-0.501563766	0.163003056	0.047319998	0.474909535	0.999885054	FALSE
1844	PF3D7_1208500.iso1.exon1.amp2_seg1_1423	-0.618868724	-0.595601182	0.162978953	0.023267542	0.474973956	0.999885054	FALSE
2596	PF3D7_1440500.e1s1_8927	0.10923545	0.188235549	0.162753213	0.079000099	0.475577562	0.999885054	FALSE
1820	PF3D7_1202300.e34s1_6594	-0.464514932	-0.446172945	0.162666142	0.018341987	0.475810502	0.999885054	FALSE
601	PF3D7_0521700.e1s1_9110	-0.687771628	-0.660086623	0.162589929	0.027685005	0.476014449	0.999885054	FALSE
2094	PF3D7_1304300.1o1_8411	-0.317177734	-0.365877198	0.162580239	-0.048699464	0.476040383	0.999885054	FALSE
1320	PF3D7_0935800.e1_5085	-0.68409735	-0.633560507	0.1625626	0.050536843	0.476087594	0.999885054	FALSE
2541	PF3D7_1432500.iso1.exon1.amp1_3600	-0.131413456	-0.070207266	0.162528444	0.06120619	0.476179021	0.999885054	FALSE
155	PF3D7_0211100.iso1.exon1.amp2_1349	0.124750985	0.163547441	0.162505418	0.038796456	0.47624066	0.999885054	FALSE
1262	PF3D7_0919900.iso1.exon1.amp4_1035	-0.268872558	-0.231487562	0.162396375	0.037384996	0.476532635	0.999885054	FALSE
757	PF3D7_0625600.1o1_7626	-0.110994704	-0.084289757	0.16213825	0.026704947	0.47722421	0.999885054	FALSE
217	PF3D7_0301200.iso1.exon3.amp1_short_4317	-0.505357787	-0.528857565	0.162132899	-0.023499778	0.477238553	0.999885054	FALSE
1255	PF3D7_0918900.e1s1_7198	-0.025635929	0.078731467	0.162128051	0.104367396	0.477251548	0.999885054	FALSE
2462	PF3D7_1411300.1o2_7340	-0.284925661	-0.232178658	0.162086432	0.052747003	0.477363114	0.999885054	FALSE
2466	PF3D7_1412300.iso1.exon2.amp1_659	-0.43422548	-0.477142207	0.161999018	-0.042916727	0.477597491	0.999885054	FALSE
464	PF3D7_0422700.e1s1_4878	-0.236354828	-0.184599491	0.161878844	0.051755337	0.477919817	0.999885054	FALSE
2151	PF3D7_1316900.iso1.exon1.amp1_3925	-0.060644325	-0.007801932	0.16164591	0.052842394	0.478544948	0.999885054	FALSE
1763	PF3D7_1140900.5o6_9108	-0.535545557	-0.489507388	0.16157187	0.046038168	0.478743752	0.999885054	FALSE
829	PF3D7_0704800.iso1.exon1.amp2_1629	0.446896183	0.553090452	0.161470069	0.106194269	0.479017175	0.999885054	FALSE
1500	PF3D7_1032100.iso1.exon1.amp2_4232	0.448244365	0.501656177	0.161469299	0.053411812	0.479019243	0.999885054	FALSE
297	PF3D7_0316500.e1s1_5735	0.408306819	0.47636721	0.161278989	0.068060391	0.47953064	0.999885054	FALSE
2758	PF3D7_1470700.iso1.exon1.amp1_164	0.323470346	0.349890142	0.161218423	0.026419795	0.479693461	0.999885054	FALSE
2606	PF3D7_1442600.iso1.exon2.amp1_1097	-0.406171694	-0.343556544	0.161069733	0.06261515	0.480093319	0.999885054	FALSE
1253	PF3D7_0918000.e1s1_8347	-0.065895488	-0.019276242	0.161023185	0.046619246	0.480218536	0.999885054	FALSE
758	PF3D7_0626100.iso1.exon2.amp1_4098	-0.546981698	-0.520511943	0.160906466	0.026469755	0.480532605	0.999885054	FALSE
148	PF3D7_0209400.2o7_8465	-0.929811256	-0.960034059	0.1608936	-0.030222803	0.480567234	0.999885054	FALSE
118	PF3D7_0204600.iso1.exon1.amp2_seg2_1153	-0.324277514	-0.230337574	0.160677385	0.09393994	0.481149372	0.999885054	FALSE
2068	PF3D7_1300300.s2 (renamed)_7313	1.293136907	1.341515465	0.160642394	0.048378558	0.481243619	0.999885054	FALSE
544	PF3D7_0509800.2o4_8246	-0.54355891	-0.492842489	0.16062531	0.05071642	0.481289639	0.999885054	FALSE
891	PF3D7_0717200.1o2_8169	-0.154946306	-0.187144762	0.160293618	-0.032198456	0.482183648	0.999885054	FALSE
2380	PF3D7_1367700.iso1.exon1.amp2_seg1_1134	-0.4000694	-0.347436831	0.160246624	0.052632568	0.482310389	0.999885054	FALSE
1031	PF3D7_0806600.e2s1_5153	-0.460612924	-0.434478064	0.160223763	0.02613486	0.482372051	0.999885054	FALSE
2464	PF3D7_1411600.1o1_8493	-0.376052245	-0.406846977	0.160200555	-0.030794732	0.482434653	0.999885054	FALSE
1671	PF3D7_1124300.1o3_7324	-0.42148978	-0.369056953	0.160143066	0.052432827	0.48258975	0.999885054	FALSE
2683	PF3D7_1455800.e2s2_8656	-0.237896514	-0.293141129	0.159927114	-0.055244615	0.483172616	0.999885054	FALSE
1132	PF3D7_0829000.e2s1_7406	-0.710894655	-0.749980869	0.15980884	-0.039086215	0.483492019	0.999885054	FALSE
2274	PF3D7_1344900.iso1.exon1.amp2_2196	-0.313937232	-0.279036527	0.159479925	0.034900705	0.484380916	0.999885054	FALSE
522	PF3D7_0506200.1o1_7857	-0.391949662	-0.362915779	0.159263023	0.029033883	0.484967619	0.999885054	FALSE
1667	PF3D7_1123500.iso1.exon1.amp1_4580	0.356311385	0.278534521	0.159180751	-0.077776864	0.485190267	0.999885054	FALSE
2020	PF3D7_1248000.1o1_9006	0.213698549	0.287073728	0.159093666	0.073375179	0.485426007	0.999885054	FALSE
1539	PF3D7_1039700.iso1.exon1.amp1_1851	0.54162109	0.619538509	0.159073863	0.077917418	0.485479623	0.999885054	FALSE
1384	PF3D7_1009600.iso1.exon3.amp1_2459	-0.211049209	-0.148601119	0.159020954	0.062448089	0.485622888	0.999885054	FALSE
246	PF3D7_0305200.iso1.exon1.amp1_3725	-0.273299496	-0.332966606	0.158715802	-0.059667109	0.486449658	0.999885054	FALSE
1193	PF3D7_0905100.iso1.exon3.amp1_1647	0.635130343	0.683216928	0.158513131	0.048086584	0.486999223	0.999885054	FALSE
2215	PF3D7_1329800.iso1.exon1.amp1_1697	-0.562041945	-0.484664848	0.158431457	0.077377097	0.487220791	0.999885054	FALSE
2761	PF3D7_1471700.iso1.exon1.amp1_2187	-0.370533096	-0.331887813	0.158384955	0.038645283	0.487346972	0.999885054	FALSE
1027	PF3D7_0806200.10o10_8244	-0.669806759	-0.621766063	0.158044601	0.048040696	0.488271078	0.999885054	FALSE
2619	PF3D7_1444100.e9s2_8378	0.193331194	0.242147704	0.157996439	0.04881651	0.488401926	0.999885054	FALSE
2278	PF3D7_1346200.1o1_5534	-0.433695801	-0.353340504	0.157923014	0.080355297	0.488601451	0.999885054	FALSE
474	PF3D7_0425500.iso1.exon1.amp1_1565	0.698123332	0.617563989	0.157724334	-0.080559343	0.489141576	0.999885054	FALSE
348	PF3D7_0400700.iso1.exon1.amp1_992	0.016964092	0.078459819	0.157722588	0.061495727	0.489146324	0.999885054	FALSE
742	PF3D7_0622100.iso1.exon1.amp1_seg1_3159	-0.638092149	-0.616056383	0.157529118	0.022035766	0.489672626	0.999885054	FALSE
2130	PF3D7_1312100.iso1.exon1.amp1_3975	-0.467720963	-0.423500238	0.157406623	0.044220725	0.490006021	0.999885054	FALSE
1625	PF3D7_1115200.2o7_7060	-0.597843286	-0.549610258	0.157366123	0.048233028	0.490116278	0.999885054	FALSE
1394	PF3D7_1012000.iso1.exon9.amp1_3295	-0.569148832	-0.547846779	0.157247032	0.021302053	0.490440579	0.999885054	FALSE
1165	PF3D7_0900900.iso1.exon1.amp1_4454	0.739114294	0.792964688	0.157205486	0.053850394	0.490553743	0.999885054	FALSE
2707	PF3D7_1462300.e1s1_4901	-0.286633036	-0.233567911	0.156859232	0.053065125	0.49149747	0.999885054	FALSE
2546	PF3D7_1433200.iso1.exon1.amp2_seg1_4618	-0.539254679	-0.510565685	0.156724501	0.028688994	0.491864968	0.999885054	FALSE
1809	PF3D7_1200600.iso1.exon2.amp3_2805	-0.687425463	-0.640078453	0.156637586	0.04734701	0.492102125	0.999885054	FALSE
23	PF3D7_0102700.2o2_7571	-0.579030273	-0.553025758	0.156634603	0.026004515	0.492110267	0.999885054	FALSE
2241	PF3D7_1335100_4824	0.31263083	0.367267732	0.156504922	0.054636902	0.492464244	0.999885054	FALSE
1830	PF3D7_1206000.1o1_7583	-0.614561801	-0.588526238	0.156388543	0.026035564	0.492782036	0.999885054	FALSE
1234	PF3D7_0912800.1o1_8778	-0.328422683	-0.212993032	0.156211941	0.115429651	0.493264506	0.999885054	FALSE
346	PF3D7_0400400.iso1.exon1.amp1_1294	0.90212228	0.958072133	0.156180718	0.055949854	0.493349834	0.999885054	FALSE
2183	PF3D7_1322500.3o6_5605	-0.746102476	-0.779222123	0.155921668	-0.033119647	0.494058111	0.999885054	FALSE
1717	PF3D7_1133700.iso1.exon1.amp1_970	0.207095988	0.16288689	0.155759233	-0.044209098	0.494502533	0.999885054	FALSE
808	PF3D7_0701600.iso1.exon2.amp1_4435	-0.018644369	0.022754731	0.155612087	0.0413991	0.49490532	0.999885054	FALSE
2220	PF3D7_1330500.1o1_7643	-0.31076657	-0.252799505	0.155579437	0.057967064	0.49499472	0.999885054	FALSE
205	PF3D7_0223300.iso1.exon2.amp1_3611	1.215765899	1.28105613	0.155554008	0.065290231	0.495064356	0.999885054	FALSE
2290	PF3D7_1347900.iso1.exon3.amp2_4565	-0.250446258	-0.14633795	0.155532841	0.104108307	0.495122323	0.999885054	FALSE
867	PF3D7_0712000.iso1.exon1.amp1_145	1.46667092	1.507029378	0.15551696	0.040358457	0.495165817	0.999885054	FALSE
1827	PF3D7_1205500.e1s1_6267	-0.692317413	-0.720281883	0.155503381	-0.02796447	0.495203008	0.999885054	FALSE
165	PF3D7_0213000.1o1_4661	-0.812992541	-0.780777584	0.155155398	0.032214958	0.496156639	0.999885054	FALSE
2398	PF3D7_1400200.iso1.exon1.amp1_2453	-0.319670275	-0.274870694	0.155043023	0.044799581	0.496464824	0.999885054	FALSE
2205	PF3D7_1328300.1o3_6129	2.22174497	2.273046392	0.154683309	0.051301421	0.497452067	0.999885054	FALSE
1077	PF3D7_0815400.e1s1_8889	-0.822294398	-0.796872044	0.15458403	0.025422354	0.497724739	0.999885054	FALSE
786	PF3D7_0631100.iso1.exon2.amp1_1011	0.200246354	0.238103846	0.154506869	0.037857492	0.497936726	0.999885054	FALSE
2385	PF3D7_1368600.iso1.exon1.amp1_4422	-0.37209591	-0.334285778	0.154142741	0.037810133	0.498937793	0.999885054	FALSE
69	PF3D7_0113100.iso1.exon2.amp1_4270	-0.908405707	-0.855022081	0.154006669	0.053383626	0.499312181	0.999885054	FALSE
1777	PF3D7_1145200.iso1.exon1.amp3_2211	-0.34869135	-0.321314961	0.1539945	0.027376389	0.49934567	0.999885054	FALSE
2256	PF3D7_1338300.e2s1_7486	0.045957105	0.100881725	0.153982316	0.05492462	0.499379203	0.999885054	FALSE
1298	PF3D7_0930100.iso1.exon1.amp2_192	-0.452280551	-0.473667629	0.153932856	-0.021387078	0.499515337	0.999885054	FALSE
2364	PF3D7_1363400.iso1.exon1.amp1_3340	-0.293399578	-0.210544676	0.153840304	0.082854902	0.499770137	0.999885054	FALSE
1586	PF3D7_1105600.e1s1_6922	-0.613573922	-0.553667379	0.153730101	0.059906543	0.500073628	0.999885054	FALSE
2444	PF3D7_1408700.e1s2_6563	-0.691145316	-0.639279498	0.15368144	0.051865817	0.500207668	0.999885054	FALSE
641	PF3D7_0530900.iso1.exon1.amp3_3077	-0.365976589	-0.314895741	0.15352375	0.051080847	0.500642184	0.999885054	FALSE
2753	PF3D7_1470100.e1s2_6062	0.244574418	0.304207639	0.153337538	0.059633221	0.50115557	0.999885054	FALSE
568	PF3D7_0514100.iso1.exon1.amp2_3648	-0.510050308	-0.546710742	0.153168913	-0.036660434	0.50162073	0.999885054	FALSE
1557	PF3D7_1100100.iso1.exon2.amp1_1582	0.770958721	0.736009461	0.153120135	-0.03494926	0.501755333	0.999885054	FALSE
261	PF3D7_0309200.iso1.exon3.amp2_2542	-0.553159146	-0.531593547	0.153116605	0.021565598	0.501765074	0.999885054	FALSE
884	PF3D7_0715000.1o1_5833	-0.444720538	-0.422336673	0.153006442	0.022383865	0.502069149	0.999885054	FALSE
1271	PF3D7_0922200.e1s1_7191	-0.571632018	-0.526737603	0.152868264	0.044894416	0.502450696	0.999885054	FALSE
2401	PF3D7_1400500.iso1.exon1.amp1_2435	-0.004382601	-0.049766356	0.152596433	-0.045383755	0.503201783	0.999885054	FALSE
1151	PF3D7_0832900.iso1.exon3.amp1_986	0.923029765	0.981622338	0.15229463	0.058592573	0.504036434	0.999885054	FALSE
514	PF3D7_0505100.iso1.exon1.amp1_1083	-0.140350759	-0.086565688	0.152173784	0.053785071	0.504370862	0.999885054	FALSE
735	PF3D7_0620400.1o1_7613	0.805348834	0.853936669	0.152033973	0.048587836	0.504757929	0.999885054	FALSE
1283	PF3D7_0925800.e1s1_9121	-0.555187981	-0.512070829	0.151982423	0.043117151	0.504900688	0.999885054	FALSE
97	PF3D7_0201800.iso1.exon1.amp1_4451	0.130934551	0.235623531	0.151963635	0.10468898	0.504952724	0.999885054	FALSE
1655	PF3D7_1122000.iso1.exon1.amp1_4471	-0.6971253	-0.656973059	0.151847265	0.040152241	0.505275095	0.999885054	FALSE
772	PF3D7_0628100.iso1.exon1.amp9_1961	0.571146218	0.634568089	0.151763992	0.063421871	0.505505853	0.999885054	FALSE
819	PF3D7_0703300.iso1.exon1.amp1_3572	-0.792203699	-0.755966747	0.151749085	0.036236953	0.505547168	0.999885054	FALSE
2055	PF3D7_1254600.iso1.exon2.amp1_2720	0.756793276	0.815204691	0.151686401	0.058411415	0.505720917	0.999885054	FALSE
91	PF3D7_0200800.iso1.exon3.amp1_406	-0.146335824	-0.169154601	0.151599481	-0.022818777	0.505961903	0.999885054	FALSE
1961	PF3D7_1234600.iso1.exon1.amp2_3083	-0.420457666	-0.338128387	0.151579032	0.082329279	0.506018606	0.999885054	FALSE
618	PF3D7_0524800.iso1.exon1.amp1_2188	0.522197046	0.615942741	0.151529364	0.093745695	0.506156349	0.999885054	FALSE
2687	PF3D7_1456600.iso1.exon1.amp1_402	-0.081932951	-0.028172083	0.151514113	0.053760868	0.506198648	0.999885054	FALSE
180	PF3D7_0217900.e1s1_7766	0.000816783	0.043120294	0.151144718	0.04230351	0.507223793	0.999885054	FALSE
2510	PF3D7_1423300.12o16_5931	-0.91039234	-0.878753777	0.15111946	0.031638562	0.507293933	0.999885054	FALSE
1638	PF3D7_1118100.iso1.exon2.amp1_2116	-0.261467422	-0.281970961	0.151097358	-0.020503539	0.507355314	0.999885054	FALSE
277	PF3D7_0311600.2o5_9087	-0.558618054	-0.521327205	0.151043965	0.037290849	0.507503608	0.999885054	FALSE
388	PF3D7_0407700.e2s1_5470	-0.762244536	-0.781971953	0.150957889	-0.019727417	0.507742732	0.999885054	FALSE
1998	PF3D7_1241700.e2s1_7179	-0.454827238	-0.473250636	0.150853677	-0.018423398	0.508032322	0.999885054	FALSE
1713	PF3D7_1133200.e1s2_5075	-0.008969886	0.032738378	0.150735554	0.041708264	0.508360681	0.999885054	FALSE
2777	PF3D7_1475500.e1s1_9171	-0.545387176	-0.499587735	0.150688425	0.045799441	0.508491725	0.999885054	FALSE
818	PF3D7_0703200.iso1.exon1.amp1_4307	-0.537218451	-0.478121858	0.150529119	0.059096593	0.508934822	0.999885054	FALSE
1112	PF3D7_0826000.iso1.exon1.amp2_3371	-0.557651651	-0.513768587	0.150428108	0.043883065	0.509215887	0.999885054	FALSE
1514	PF3D7_1035600.1o1_6162	-0.201566257	-0.140119523	0.150182262	0.061446734	0.509900332	0.999885054	FALSE
2178	PF3D7_1322100.iso1.exon1.amp3_3673	1.210951183	1.245471596	0.150152581	0.034520413	0.509982999	0.999885054	FALSE
2090	PF3D7_1304000.iso1.exon4.amp1_456	-0.138375802	-0.096987285	0.150068319	0.041388517	0.510217728	0.999885054	FALSE
2794	PF3D7_1477900.e3_8560	-0.277899252	-0.241234373	0.150040788	0.036664879	0.510294435	0.999885054	FALSE
1217	PF3D7_0909500_5686	1.56285508	1.648092247	0.149774566	0.085237168	0.511036514	0.999885054	FALSE
1855	PF3D7_1211000.e3s2_8300	0.026324302	-0.048421479	0.149755077	-0.074745781	0.511090864	0.999885054	FALSE
2504	PF3D7_1420400.e1s1_6852	-0.022174307	0.029209255	0.14955255	0.051383562	0.511655837	0.999885054	FALSE
1370	PF3D7_1007700.e1s1_6640	0.509767775	0.464011727	0.149515815	-0.045756048	0.511758352	0.999885054	FALSE
1350	PF3D7_1001700.2o2_9009	-1.252578463	-1.162029221	0.149423422	0.090549242	0.51201624	0.999885054	FALSE
1347	PF3D7_1001300.2o2_6130	0.38575536	0.348868028	0.149413352	-0.036887333	0.512044354	0.999885054	FALSE
1643	PF3D7_1119500.iso1.exon1.amp1_3300	-0.517108403	-0.492304253	0.149309193	0.024804151	0.512335179	0.999885054	FALSE
2709	PF3D7_1462400.e1s3_5416	-0.260026624	-0.23182738	0.149234567	0.028199244	0.512543603	0.999885054	FALSE
2388	PF3D7_1369200.iso1.exon1.amp2_1687	-0.538220941	-0.504887348	0.149232631	0.033333593	0.51254901	0.999885054	FALSE
1287	PF3D7_0927300.e1s1_7797	-0.589122492	-0.526597313	0.149159452	0.062525179	0.512753442	0.999885054	FALSE
375	PF3D7_0405400.e2s1_6356	-0.247083449	-0.192133423	0.14914124	0.054950026	0.512804323	0.999885054	FALSE
1963	PF3D7_1234800.e1s1_7490	-0.695459174	-0.760870152	0.148990299	-0.065410978	0.513226156	0.999885054	FALSE
210	PF3D7_0300200.iso1.exon1.amp1_3012	0.667808091	0.730870514	0.14891312	0.063062423	0.51344192	0.999885054	FALSE
1588	PF3D7_1106100.iso1.exon4.amp1_381	-0.578272493	-0.592969437	0.148520691	-0.014696945	0.514539805	0.999885054	FALSE
1676	PF3D7_1125300.iso1.exon1.amp1_2856	0.344726831	0.434294714	0.148421928	0.089567883	0.514816317	0.999885054	FALSE
1093	PF3D7_0821300.iso1.exon1.amp1_3317	-0.255754569	-0.224704334	0.148286799	0.031050235	0.515194782	0.999885054	FALSE
2237	PF3D7_1334100.1o1_5354	-0.44829168	-0.388939775	0.148237978	0.059351905	0.515331556	0.999885054	FALSE
1391	PF3D7_1011800.e1s2_7200	-0.095377849	-0.051411968	0.148154631	0.043965881	0.515565102	0.999885054	FALSE
2315	PF3D7_1352700.iso1.exon1.amp3_2204	-0.025535074	0.047424054	0.148070582	0.072959128	0.515800679	0.999885054	FALSE
100	PF3D7_0202000.e2s1_8364	-0.485503995	-0.532158037	0.147919084	-0.046654042	0.516225453	0.999885054	FALSE
2781	PF3D7_1475800.e1_5086	-0.273499391	-0.231236188	0.147876549	0.042263204	0.51634475	0.999885054	FALSE
2679	PF3D7_1455000.iso1.exon1.amp1_1834	-0.605145662	-0.58449632	0.147828954	0.020649342	0.516478257	0.999885054	FALSE
1065	PF3D7_0812100.e1s1_5364	-0.389410858	-0.359569855	0.147681864	0.029841003	0.516890975	0.999885054	FALSE
286	PF3D7_0313200.1o1_9000	-0.2678895	-0.232095588	0.147680587	0.035793912	0.516894557	0.999885054	FALSE
905	PF3D7_0718800.iso1.exon4.amp1_3221	-0.69372184	-0.673007684	0.147432194	0.020714157	0.517591938	0.999885054	FALSE
1872	PF3D7_1215400.1o1_8489	-0.535139032	-0.479975428	0.147088484	0.055163604	0.518557799	0.999885054	FALSE
1224	PF3D7_0910400.iso1.exon1.amp2_seg1_2878	-0.563708098	-0.505934202	0.14690484	0.057773896	0.519074268	0.999885054	FALSE
676	PF3D7_0605500.iso1.exon2.amp1_4494	-0.391856347	-0.347629401	0.146400979	0.044226946	0.520492772	0.999885054	FALSE
1382	PF3D7_1009300.iso1.exon1.amp1_1604	-0.343480473	-0.321325466	0.146284472	0.022155007	0.520821077	0.999885054	FALSE
971	PF3D7_0731100.2o2_6789	0.668953259	0.717595824	0.146075334	0.048642564	0.521410698	0.999885054	FALSE
1933	PF3D7_1229600.iso1.exon2.amp1_804	-0.049011127	-0.088088036	0.145937049	-0.039076909	0.521800766	0.999885054	FALSE
2272	PF3D7_1343900.1o1_8783	-0.38862015	-0.353601534	0.145794931	0.035018616	0.522201816	0.999885054	FALSE
1885	PF3D7_1219300.iso1.exon1.amp1_4486	0.176524783	0.214043495	0.145736202	0.037518712	0.522367596	0.999885054	FALSE
33	PF3D7_0105700.iso1.exon1.amp2_233	-0.758373118	-0.6515206	0.145602593	0.106852518	0.522744856	0.999885054	FALSE
633	PF3D7_0529000.1o1_7059	-0.411336534	-0.328209188	0.145585541	0.083127346	0.522793013	0.999885054	FALSE
1052	PF3D7_0809100.iso1.exon1.amp1_4184	0.285399249	0.304754805	0.145536574	0.019355556	0.522931323	0.999885054	FALSE
185	PF3D7_0219400.iso1.exon2.amp1_1777	-1.236666042	-1.12638874	0.145505661	0.110277302	0.523018648	0.999885054	FALSE
2325	PF3D7_1354500.e1s1_8641	-0.589940788	-0.610924524	0.145281528	-0.020983736	0.523652037	0.999885054	FALSE
1722	PF3D7_1134300.iso1.exon1.amp1_4294	-0.591715656	-0.55600228	0.145267963	0.035713376	0.523690383	0.999885054	FALSE
1129	PF3D7_0828200.iso1.exon1.amp2_1624	-0.232378264	-0.168848889	0.145218815	0.063529374	0.523829335	0.999885054	FALSE
2367	PF3D7_1364300.iso1.exon1.amp1_545	-0.422942766	-0.436935914	0.144827355	-0.013993148	0.524936806	0.999885054	FALSE
2600	PF3D7_1441300.e5s1_5485	-0.675312346	-0.651183162	0.144748043	0.024129184	0.525161345	0.999885054	FALSE
1153	PF3D7_0833100.iso1.exon3.amp1_4170	-0.052532908	-0.015576586	0.144680334	0.036956321	0.525353075	0.999885054	FALSE
2240	PF3D7_1334800.1o1_8159	1.43460621	1.390713888	0.144560198	-0.043892322	0.525693358	0.999885054	FALSE
2744	PF3D7_1468400.1o1_7068	-0.49719044	-0.465513924	0.144540992	0.031676516	0.525747772	0.999885054	FALSE
727	PF3D7_0619000.iso2.exon13.amp1_3564	-0.455757172	-0.492613058	0.14437323	-0.036855886	0.526223186	0.999885054	FALSE
2236	PF3D7_1334000.iso1.exon1.amp1_1879	-0.216361325	-0.147880265	0.144278583	0.06848106	0.526491506	0.999885054	FALSE
657	PF3D7_0601000.iso1.exon1.amp1_3293	-0.708455245	-0.63028427	0.144068304	0.078170975	0.527087908	0.999885054	FALSE
722	PF3D7_0618900.2o10_5031	-0.372927401	-0.339072462	0.143943434	0.033854939	0.527442248	0.999885054	FALSE
1853	PF3D7_1210600.iso1.exon1.amp2_4535	-0.450750343	-0.404408683	0.143929311	0.046341661	0.527482333	0.999885054	FALSE
390	PF3D7_0408000.iso1.exon1.amp1_683	-0.540780059	-0.493550412	0.143688795	0.047229647	0.528165234	0.999885054	FALSE
1969	PF3D7_1235400.e1s2_5177	-0.437558472	-0.413749393	0.143516502	0.023809079	0.528654727	0.999885054	FALSE
832	PF3D7_0705000.e1s2_6251	-0.116354987	-0.086626389	0.143484142	0.029728598	0.528746693	0.999885054	FALSE
1709	PF3D7_1131600.s2_8288	0.031589202	0.060589018	0.14345197	0.028999816	0.528838129	0.999885054	FALSE
2737	PF3D7_1467400.1o1_7871	-0.905247454	-0.875697146	0.143441315	0.029550308	0.528868417	0.999885054	FALSE
2774	PF3D7_1475400.e2s2_5688	-0.734660223	-0.695536334	0.143006532	0.039123889	0.530105041	0.999885054	FALSE
1459	PF3D7_1021500.iso1.exon1.amp1_154	-0.596044309	-0.623118374	0.142854059	-0.027074065	0.530539085	0.999885054	FALSE
2048	PF3D7_1253800.iso1.exon2.amp1_968	-0.716986258	-0.682592603	0.142833816	0.034393655	0.530596725	0.999885054	FALSE
32	PF3D7_0105600.e2_4833	-0.741375247	-0.697707887	0.142832184	0.04366736	0.530601372	0.999885054	FALSE
1308	PF3D7_0931600.iso1.exon2.amp1_2996	-0.397451585	-0.312703107	0.142580238	0.084748478	0.531319059	0.999885054	FALSE
1366	PF3D7_1006000.iso1.exon2.amp1_1866	-0.277969249	-0.217459549	0.142432866	0.060509699	0.531739107	0.999885054	FALSE
1126	PF3D7_0827800.e1s3_6929	-0.519652135	-0.553257999	0.142280044	-0.033605865	0.532174878	0.999885054	FALSE
223	PF3D7_0301800.2o2_9014	-0.451162973	-0.547424266	0.142042039	-0.096261293	0.532853939	0.999885054	FALSE
1503	PF3D7_1033700.e3s1_8911	-0.578510088	-0.598606966	0.141984361	-0.020096878	0.533018574	0.999885054	FALSE
1841	PF3D7_1208100 (renamed, has duplicates)_7883	-0.746358837	-0.722913233	0.141919578	0.023445605	0.533203523	0.999885054	FALSE
651	PF3D7_0600200.iso1.exon1.amp3_1938	-0.396578085	-0.366363411	0.141833264	0.030214674	0.533449995	0.999885054	FALSE
749	PF3D7_0623800.iso1.exon1.amp3_470	-0.56293352	-0.532171015	0.141829352	0.030762505	0.533461166	0.999885054	FALSE
1156	PF3D7_0833400.iso1.exon3.amp1_4185	-0.138304222	-0.121770045	0.141735131	0.016534177	0.533730292	0.999885054	FALSE
1478	PF3D7_1024300.1o1_7540	-0.366430426	-0.332920789	0.141717432	0.033509637	0.533780852	0.999885054	FALSE
1572	PF3D7_1102500.e2s1_5459	1.081260435	1.206827826	0.141410685	0.125567391	0.534657575	0.999885054	FALSE
2713	PF3D7_1463300.e1s1_7192	-0.285832551	-0.256841543	0.141363006	0.028991009	0.534793916	0.999885054	FALSE
2615	PF3D7_1444100.e6s1_8652	0.200063229	0.172605985	0.14130841	-0.027457244	0.534950061	0.999885054	FALSE
37	PF3D7_0106500.iso1.exon1.amp1_2562	-0.478260312	-0.526414597	0.141264748	-0.048154285	0.535074955	0.999885054	FALSE
1041	PF3D7_0807800.e2s1_6602	0.427886637	0.371481093	0.141250026	-0.056405544	0.535117069	0.999885054	FALSE
750	PF3D7_0623900.1o1_5269	0.501457182	0.59157093	0.141140544	0.090113748	0.535430319	0.999885054	FALSE
1641	PF3D7_1118800.2o7_5861	-0.701148796	-0.680587478	0.14087334	0.020561319	0.536195262	0.999885054	FALSE
1604	PF3D7_1110700.e2s1_5162	-0.529874262	-0.554554669	0.140656847	-0.024680407	0.536815468	0.999885054	FALSE
1960	PF3D7_1234600.iso1.exon1.amp1_2569	-0.492466915	-0.466032105	0.140650513	0.02643481	0.536833619	0.999885054	FALSE
2069	PF3D7_1300400.iso1.exon2.amp1_1295	0.596721624	0.648422701	0.140557265	0.051701078	0.537100877	0.999885054	FALSE
415	PF3D7_0412900.iso1.exon2.amp2_3385	-0.898095047	-0.854454831	0.140542394	0.043640216	0.537143508	0.999885054	FALSE
1040	PF3D7_0807700.5o5_5617	-0.402987859	-0.345707579	0.140296421	0.05728028	0.537848872	0.999885054	FALSE
1113	PF3D7_0826100.s1_5414	-0.841204253	-0.813895368	0.140121315	0.027308885	0.538351321	0.999885054	FALSE
316	PF3D7_0318600.iso1.exon1.amp2_200	-0.557882202	-0.526298655	0.140062808	0.031583547	0.538519257	0.999885054	FALSE
2268	PF3D7_1343400.iso1.exon3.amp1_4541	-0.241732577	-0.181448954	0.139891791	0.060283624	0.539010303	0.999885054	FALSE
1480	PF3D7_1024800.e2s2_5767	0.571395647	0.610838551	0.139874311	0.039442904	0.539060506	0.999885054	FALSE
1859	PF3D7_1211900.e2s1_8064	-0.759624466	-0.711927038	0.139693773	0.047697428	0.53957918	0.999885054	FALSE
2258	PF3D7_1339300.1o1_6993	0.070403259	0.117902621	0.139627903	0.047499362	0.539768484	0.999885054	FALSE
469	PF3D7_0424600.e2s1_8623	-0.338287721	-0.305735334	0.139605807	0.032552387	0.539831997	0.999885054	FALSE
72	PF3D7_0113400.2o2_8752	0.155252082	0.286173849	0.139560138	0.130921767	0.539963276	0.999885054	FALSE
341	PF3D7_0400100.iso1.exon1.amp2_3971	-0.435165069	-0.374628358	0.139213252	0.06053671	0.540960993	0.999885054	FALSE
1406	PF3D7_1013400.iso1.exon9.amp1_3307	-0.280622594	-0.251215828	0.139028759	0.029406766	0.54149204	0.999885054	FALSE
1416	PF3D7_1014600.e1s2_7100	-0.012635188	0.03883385	0.138954024	0.051469038	0.541707237	0.999885054	FALSE
465	PF3D7_0423100.iso1.exon1.amp1_3832	-0.708405947	-0.732716271	0.138789594	-0.024310324	0.542180872	0.999885054	FALSE
2357	PF3D7_1360900.e8s1_5721	-0.593717917	-0.571529349	0.138532948	0.022188569	0.542920577	0.999885054	FALSE
2708	PF3D7_1462300.e1s2_6057	-0.590341966	-0.560545485	0.138478129	0.029796481	0.543078648	0.999885054	FALSE
482	PF3D7_0500100.iso1.exon2.amp1_1299	1.632228117	1.705716837	0.13835305	0.07348872	0.543439403	0.999885054	FALSE
2710	PF3D7_1462700.e2s1_7485	-0.018910042	0.045803442	0.138053906	0.064713484	0.544302725	0.999885054	FALSE
42	PF3D7_0108300.s3_7689	0.174950564	0.111236098	0.137967081	-0.063714465	0.544553439	0.999885054	FALSE
306	PF3D7_0317700.e1s1_8247	-0.566814254	-0.522527733	0.137727746	0.044286521	0.545244855	0.999885054	FALSE
2438	PF3D7_1407900.e1s1_6608	0.02365916	0.054389327	0.137174416	0.030730167	0.546845171	0.999885054	FALSE
1456	PF3D7_1021000.iso1.exon2.amp1_3284	-0.55385246	-0.534462306	0.137164127	0.019390155	0.546874953	0.999885054	FALSE
923	PF3D7_0723000.iso1.exon1.amp1_3306	-0.256162456	-0.218709318	0.136560133	0.037453137	0.548624716	0.999885054	FALSE
2677	PF3D7_1454800.1o1_6401	0.201988356	0.166377589	0.136381492	-0.035610767	0.549142806	0.999885054	FALSE
1607	PF3D7_1111400.iso1.exon1.amp1_2422	-0.254869731	-0.293629493	0.136197132	-0.038759762	0.549677759	0.999885054	FALSE
2456	PF3D7_1410100.1o7_5851	-0.21247749	-0.168250224	0.135990661	0.044227266	0.550277197	0.999885054	FALSE
1567	PF3D7_1101300.iso1.exon1.amp1_2434	0.536862025	0.580515631	0.135424239	0.043653607	0.551923454	0.999885054	FALSE
2471	PF3D7_1414600.e1s1_6026	0.092769546	0.168870164	0.135335182	0.076100618	0.552182529	0.999885054	FALSE
1801	PF3D7_1150300.iso1.exon1.amp1_2740	-0.567955125	-0.521635703	0.135330745	0.046319423	0.552195438	0.999885054	FALSE
747	PF3D7_0623400.1o1_5006	0.03927424	0.077487076	0.135171429	0.038212836	0.552659067	0.999885054	FALSE
1848	PF3D7_1209500.1.3o3_5905	-0.466021001	-0.438748644	0.135169519	0.027272357	0.552664627	0.999885054	FALSE
2648	PF3D7_1449800.1o1_6113	-0.583133723	-0.624306779	0.135119698	-0.041173056	0.552809657	0.999885054	FALSE
123	PF3D7_0206800_8292	1.055753953	1.094233575	0.135077077	0.038479622	0.552933741	0.999885054	FALSE
1876	PF3D7_1216600_6846	0.425266152	0.453697624	0.134801377	0.028431471	0.553736761	0.999885054	FALSE
1899	PF3D7_1221600.1o1_4708	0.340486489	0.275794588	0.134230421	-0.064691902	0.555401724	0.999885054	FALSE
393	PF3D7_0408700.e5s1_7160	-0.861482496	-0.787439496	0.134195159	0.074043	0.555504639	0.999885054	FALSE
2154	PF3D7_1317500.iso1.exon1.amp1_2114	-0.097825948	-0.068122745	0.134164593	0.029703204	0.555593855	0.999885054	FALSE
2601	PF3D7_1441400.e1s1_4869	-0.485001939	-0.421436472	0.133788752	0.063565467	0.556691484	0.999885054	FALSE
2772	PF3D7_1474000.iso1.exon1.amp3_3078	0.35195887	0.40588808	0.133434022	0.053929209	0.557728504	0.999885054	FALSE
2378	PF3D7_1366600_7102	-0.634391527	-0.588158347	0.133374579	0.04623318	0.55790238	0.999885054	FALSE
840	PF3D7_0707400.iso1.exon1.amp1_1310	0.911963167	1.022857807	0.133338433	0.110894641	0.558008123	0.999885054	FALSE
2302	PF3D7_1350500.iso1.exon1.amp2_3950	-0.528464728	-0.554011021	0.133229624	-0.025546293	0.558326506	0.999885054	FALSE
1330	PF3D7_0936700.1o1_7018	-0.334500066	-0.313473703	0.133133069	0.021026363	0.55860911	0.999885054	FALSE
1162	PF3D7_0900500.iso1.exon1.amp1_4464	0.878001399	0.958029265	0.13309426	0.080027866	0.55872272	0.999885054	FALSE
901	PF3D7_0718300.e5s1_8050	0.14591542	0.231217199	0.133066217	0.085301778	0.558804822	0.999885054	FALSE
1228	PF3D7_0911300.e1s2_8013	-0.248349987	-0.28422716	0.132977863	-0.035877173	0.559063535	0.999885054	FALSE
2665	PF3D7_1453200.iso1.exon12.amp1_85	-1.183354556	-1.20382219	0.132895374	-0.020467634	0.559305133	0.999885054	FALSE
63	PF3D7_0111500.e5s1_5099	-0.483046663	-0.502738944	0.132828415	-0.019692281	0.559501285	0.999885054	FALSE
951	PF3D7_0727900.e1s2_5080	-0.345606373	-0.321306373	0.132766247	0.024299999	0.559683436	0.999885054	FALSE
1408	PF3D7_1013900.iso1.exon1.amp2_seg2_4622	0.114018978	0.172592243	0.132645287	0.058573265	0.560037936	0.999885054	FALSE
1303	PF3D7_0930700.iso1.exon1.amp1_702	-0.58741332	-0.612380592	0.132145009	-0.024967272	0.561505349	0.999885054	FALSE
959	PF3D7_0729500.iso1.exon1.amp1_1884	-0.32561847	-0.363005831	0.132095265	-0.037387361	0.561651369	0.999885054	FALSE
360	PF3D7_0402200 (renamed)_8951	-0.042253177	0.035922645	0.131740759	0.078175822	0.562692563	0.999885054	FALSE
18	PF3D7_0102200.e1s1_8021	-1.011092781	-0.9628653	0.131460416	0.048227481	0.563516651	0.999885054	FALSE
391	PF3D7_0408600_7148	-0.621579691	-0.552142187	0.131125415	0.069437504	0.564502232	0.999885054	FALSE
45	PF3D7_0108600.iso1.exon4.amp1_4380	-0.130810921	-0.108697934	0.13111489	0.022112987	0.564533212	0.999885054	FALSE
9	PF3D7_0100600.iso1.exon1.amp1_2163	1.389768505	1.476429737	0.131106454	0.086661232	0.564558043	0.999885054	FALSE
496	PF3D7_0501800.e1s1_4880	0.366800339	0.414995641	0.130634944	0.048195302	0.565946825	0.999885054	FALSE
290	PF3D7_0313700.iso1.exon2.amp1_2360	-0.290702126	-0.219961618	0.130617506	0.070740508	0.565998222	0.999885054	FALSE
2194	PF3D7_1326000.2o4_5817	-0.635894361	-0.608240109	0.130530013	0.027654253	0.566256131	0.999885054	FALSE
710	PF3D7_0615100.1o1_7590	-0.281168869	-0.244566453	0.130497046	0.036602416	0.566353325	0.999885054	FALSE
197	PF3D7_0222500.iso1.exon2.amp1_987	0.262696053	0.332109729	0.130321013	0.069413676	0.566872459	0.999885054	FALSE
349	PF3D7_0400800.iso1.exon1.amp1_3008	1.080181827	1.125523382	0.130097458	0.045341555	0.567532093	0.999885054	FALSE
1860	PF3D7_1212000 (renamed)_7876	0.043048997	0.073618015	0.130094027	0.030569018	0.567542219	0.999885054	FALSE
2339	PF3D7_1358200.iso1.exon2.amp1_364	-0.367633803	-0.382487095	0.129657494	-0.014853293	0.568831435	0.999885054	FALSE
81	PF3D7_0115400.iso1.exon2.amp1_2714	0.347627797	0.412128371	0.129350618	0.064500574	0.56973864	0.999885054	FALSE
635	PF3D7_0529400.1.e5s1_7458	-0.52091085	-0.558152341	0.129313735	-0.037241491	0.569847724	0.999885054	FALSE
2292	PF3D7_1348000.iso1.exon1.amp2_1325	0.681742034	0.716824975	0.129261498	0.035082941	0.570002241	0.999885054	FALSE
2618	PF3D7_1444100.e9s1_8667	-1.055067333	-1.026173613	0.12913412	0.02889372	0.570379113	0.999885054	FALSE
634	PF3D7_0529400.1.e2s1_8277	-0.682963844	-0.666730755	0.12905129	0.016233088	0.570624248	0.999885054	FALSE
2074	PF3D7_1300900.iso1.exon1.amp1_4455	0.513076957	0.548283578	0.128876991	0.035206621	0.571140265	0.999885054	FALSE
2027	PF3D7_1250100.e1s3_4905	-0.636172177	-0.612067018	0.12885667	0.024105159	0.571200443	0.999885054	FALSE
1306	PF3D7_0931300_6263	-0.835821596	-0.855342207	0.128607388	-0.019520611	0.571938902	0.999885054	FALSE
2291	PF3D7_1348000.iso1.exon1.amp1_785	-0.164107011	-0.138437021	0.128589387	0.02566999	0.571992248	0.999885054	FALSE
285	PF3D7_0313100.1o4_8505	-0.202405903	-0.237905028	0.128551566	-0.035499124	0.572104336	0.999885054	FALSE
2651	PF3D7_1450400.iso1.exon1.amp2_1326	-0.09980866	-0.14765667	0.128543699	-0.04784801	0.572127652	0.999885054	FALSE
1360	PF3D7_1004300.iso1.exon1.amp2_2505	-0.800063399	-0.836712491	0.128463713	-0.036649092	0.572364743	0.999885054	FALSE
2425	PF3D7_1405400.e4s1_5172	0.436412601	0.499469789	0.12845906	0.063057188	0.572378535	0.999885054	FALSE
924	PF3D7_0723200.e4s1_7754	-0.701745429	-0.684038458	0.128242838	0.01770697	0.573019713	0.999885054	FALSE
737	PF3D7_0621200.iso1.exon1.amp1_1855	-0.094191454	-0.052744766	0.128057748	0.041446688	0.573568865	0.999885054	FALSE
725	PF3D7_0619000.1.e12_5382	-0.699310269	-0.6752984	0.128039345	0.024011869	0.57362348	0.999885054	FALSE
336	PF3D7_0324600.iso1.exon2.amp1_3003	0.526405817	0.566453829	0.127852226	0.040048012	0.574178951	0.999885054	FALSE
2564	PF3D7_1435800.iso1.exon1.amp1_147	-0.124174162	-0.083824692	0.127813414	0.04034947	0.574294202	0.999885054	FALSE
1579	PF3D7_1103500.1o2_7831	0.26089082	0.327519114	0.127797743	0.066628294	0.574340741	0.999885054	FALSE
2675	PF3D7_1454500.iso1.exon1.amp1_3278	-0.798322235	-0.774530289	0.127757428	0.023791946	0.574460469	0.999885054	FALSE
284	PF3D7_0313000.1o2_7579	-0.308687866	-0.36092721	0.127737245	-0.052239344	0.574520416	0.999885054	FALSE
1161	PF3D7_0900400.iso1.exon2.amp1_1867	-0.352630475	-0.33278805	0.127674431	0.019842425	0.574707001	0.999885054	FALSE
1086	PF3D7_0817700.iso1.exon15.amp1_2691	-0.42714589	-0.402408751	0.127588726	0.024737139	0.574961633	0.999885054	FALSE
2123	PF3D7_1310800.iso1.exon3.amp1_seg2_288	-0.44360252	-0.4604421	0.127506151	-0.01683958	0.575207017	0.999885054	FALSE
2714	PF3D7_1463400.iso1.exon1.amp1_718	-0.425417791	-0.450715545	0.127304388	-0.025297754	0.575806816	0.999885054	FALSE
2511	PF3D7_1423700.e1s1_5199	-0.218390815	-0.261820934	0.127203333	-0.043430118	0.576107354	0.999885054	FALSE
119	PF3D7_0204800.iso1.exon1.amp1_3895	-0.445761087	-0.407644271	0.127200765	0.038116816	0.576114992	0.999885054	FALSE
1427	PF3D7_1016300.e1s1_5130	-0.440346655	-0.402821	0.127100371	0.037525655	0.576413642	0.999885054	FALSE
2224	PF3D7_1331100.iso1.exon5.amp1_1893	-0.290570132	-0.179530907	0.127052629	0.111039225	0.576555691	0.999885054	FALSE
1881	PF3D7_1218600.e2s1_6329	-0.522621904	-0.553795752	0.126920852	-0.031173848	0.576947871	0.999885054	FALSE
2127	PF3D7_1311400.e1s1_8342	-0.405931893	-0.365304209	0.126872299	0.040627683	0.577092403	0.999885054	FALSE
513	PF3D7_0504800.iso1.exon1.amp2_1667	-0.486038796	-0.450361723	0.126786062	0.035677074	0.577349155	0.999885054	FALSE
996	PF3D7_0800700.e3s1_5772	-0.3551295	-0.315605274	0.126658093	0.039524226	0.577730265	0.999885054	FALSE
2482	PF3D7_1417100.iso1.exon1.amp1_979	-0.58859003	-0.548831597	0.126394539	0.039758433	0.578515568	0.999885054	FALSE
1300	PF3D7_0930300.s1_9167	-0.102775253	-0.009653941	0.126231217	0.093121312	0.579002485	0.999885054	FALSE
1179	PF3D7_0902900.1o1_8123	0.004853517	0.086586393	0.126208778	0.081732877	0.579069399	0.999885054	FALSE
1902	PF3D7_1222600 (renamed, has duplicates)_6843	1.492565182	1.53255401	0.126179748	0.039988828	0.579155975	0.999885054	FALSE
159	PF3D7_0212200.iso1.exon2.amp1_4153	-0.554002223	-0.533112837	0.126178478	0.020889386	0.579159764	0.999885054	FALSE
1898	PF3D7_1221500.1o1_6483	-0.423197291	-0.442085565	0.125831665	-0.018888275	0.580194559	0.999885054	FALSE
2059	PF3D7_1255100.iso1.exon2.amp1_3024	-0.025430395	0.015527705	0.125650781	0.0409581	0.580734641	0.999885054	FALSE
2053	PF3D7_1254400.iso1.exon2.amp1_4171	0.135049579	0.181398171	0.125596927	0.046348591	0.580895486	0.999885054	FALSE
2547	PF3D7_1433500.e1s1_5191	-0.551151182	-0.503193092	0.1255933	0.04795809	0.58090632	0.999885054	FALSE
1946	PF3D7_1232100.e1_8842	-0.489978649	-0.462091879	0.125458463	0.02788677	0.581309138	0.999885054	FALSE
5	PF3D7_0100200.iso1.exon1.amp1_706	0.160665309	0.184419074	0.125440947	0.023753766	0.581361479	0.999885054	FALSE
1418	PF3D7_1014800.6o11_8787	-0.481718716	-0.451989872	0.125390995	0.029728844	0.581510749	0.999885054	FALSE
2083	PF3D7_1302500.iso1.exon1.amp2_3932	-0.394207354	-0.417450588	0.125026158	-0.023243234	0.582601584	0.999885054	FALSE
1622	PF3D7_1114700.e1_8271	-0.055521066	-0.083809106	0.125014818	-0.02828804	0.582635506	0.999885054	FALSE
2096	PF3D7_1304700.iso1.exon1.amp1_3232	-0.619796726	-0.654288146	0.124922807	-0.03449142	0.582910783	0.999885054	FALSE
574	PF3D7_0516600.s1_6862	-0.441737624	-0.411271374	0.124905086	0.030466249	0.582963806	0.999885054	FALSE
287	PF3D7_0313300.iso1.exon5.amp1_931	-0.514318989	-0.47950332	0.124648199	0.034815669	0.583732738	0.999885054	FALSE
1125	PF3D7_0827800.e1s1_6935	-0.316412413	-0.268370957	0.124523591	0.048041456	0.584105907	0.999885054	FALSE
1812	PF3D7_1201300.1o1_7539	-0.206822163	-0.180145031	0.124438304	0.026677132	0.584361387	0.999885054	FALSE
1044	PF3D7_0808200.e1s1_9217	0.779172015	0.814882059	0.124350823	0.035710045	0.5846235	0.999885054	FALSE
2443	PF3D7_1408600.e2s1_6867	-0.510839073	-0.47540226	0.124314134	0.035436813	0.584733448	0.999885054	FALSE
1979	PF3D7_1237900.iso1.exon1.amp1_4591	-0.546162614	-0.479445414	0.12422156	0.0667172	0.585010909	0.999885054	FALSE
1873	PF3D7_1215900.1o1_5893	-0.58746462	-0.544030087	0.124136501	0.043434532	0.585265904	0.999885054	FALSE
1278	PF3D7_0924000.iso1.exon2.amp1_2373	-0.4812663	-0.501845456	0.124019583	-0.020579156	0.585616504	0.999885054	FALSE
1566	PF3D7_1101200.iso1.exon1.amp1_3319	0.968233638	1.05066666	0.124015656	0.082433022	0.585628281	0.999885054	FALSE
1893	PF3D7_1220600.2o4_7295	-0.348978276	-0.329611761	0.123673191	0.019366515	0.586655833	0.999885054	FALSE
2798	PF3D7_1479500.iso1.exon2.amp1_3581	1.089869763	1.040755506	0.123552732	-0.049114257	0.58701748	0.999885054	FALSE
1421	PF3D7_1015100.1o1_9044	-0.394595692	-0.3025075	0.123017176	0.092088192	0.588626698	0.999885054	FALSE
976	PF3D7_0732000.iso1.exon2.amp1_690	1.162424496	1.20211251	0.122834451	0.039688015	0.589176247	0.999885054	FALSE
179	PF3D7_0217700.iso1.exon1.amp1_3848	0.135152871	0.11323439	0.12281987	-0.021918481	0.589220109	0.999885054	FALSE
472	PF3D7_0425200.2o2_5531	-0.245059025	-0.213899165	0.1226804	0.03115986	0.589639755	0.999885054	FALSE
44	PF3D7_0108400.iso1.exon7.amp1_45	-0.015722003	-0.078202038	0.122456768	-0.062480035	0.590312944	0.999885054	FALSE
2785	PF3D7_1476700.iso1.exon1.amp1_124	-0.431312947	-0.405547445	0.122449847	0.025765501	0.590333784	0.999885054	FALSE
874	PF3D7_0712900.iso1.exon1.amp1_3316	0.8143166	0.867720573	0.122419125	0.053403973	0.590426296	0.999885054	FALSE
1618	PF3D7_1113000.iso1.exon5.amp1_118	-0.592032194	-0.615813164	0.122078801	-0.02378097	0.591451586	0.999885054	FALSE
691	PF3D7_0608310.iso1.exon3.amp1_440	-0.746554376	-0.724983309	0.122031838	0.021571067	0.59159314	0.999885054	FALSE
1699	PF3D7_1129100.e1s1_6319	-0.144051818	-0.207263987	0.121930349	-0.063212169	0.591899103	0.999885054	FALSE
827	PF3D7_0704600.iso1.exon5.amp3_seg1_283	0.016192566	0.04410991	0.121742486	0.027917343	0.592465669	0.999885054	FALSE
2216	PF3D7_1329800.iso1.exon1.amp2_2214	-0.549574302	-0.538746815	0.121720225	0.010827487	0.592532822	0.999885054	FALSE
1135	PF3D7_0830800.iso1.exon1.amp1_1373	0.199493127	0.235488499	0.121676961	0.035995372	0.592663344	0.999885054	FALSE
1155	PF3D7_0833300.iso1.exon1.amp1_1870	0.928650993	0.988209356	0.121539867	0.059558363	0.593077035	0.999885054	FALSE
2245	PF3D7_1335400.iso1.exon2.amp3_4277	-0.498869357	-0.531563566	0.121350623	-0.032694209	0.593648326	0.999885054	FALSE
426	PF3D7_0416300.iso1.exon1.amp2_462	-0.340182634	-0.385091194	0.121174593	-0.04490856	0.594179972	0.999885054	FALSE
984	PF3D7_0733000.iso1.exon2.amp3_1942	-0.449082308	-0.402926124	0.121064097	0.046156184	0.594513813	0.999885054	FALSE
826	PF3D7_0704500.iso1.exon1.amp2_178	-0.289197599	-0.310759074	0.121024907	-0.021561475	0.59463224	0.999885054	FALSE
2635	PF3D7_1447700.1o1_8446	-0.436902317	-0.491449656	0.121013532	-0.054547339	0.594666615	0.999885054	FALSE
318	PF3D7_0319100.1o1_7545	-0.632381005	-0.610964048	0.120969403	0.021416957	0.594799984	0.999885054	FALSE
1074	PF3D7_0815100.iso1.exon1.amp1_2474	-0.498420756	-0.467525282	0.120642087	0.030895474	0.595789677	0.999885054	FALSE
1103	PF3D7_0823900.1o1_8440	0.168408258	0.116298233	0.120500778	-0.052110025	0.596217198	0.999885054	FALSE
584	PF3D7_0518700.e1s1_5478	-0.663319825	-0.691614434	0.120462315	-0.028294608	0.596333592	0.999885054	FALSE
2103	PF3D7_1306300.iso1.exon2.amp1_452	-0.052978243	-0.012179328	0.120372859	0.040798914	0.59660434	0.999885054	FALSE
933	PF3D7_0724700.e2s2_8380	-0.135438519	-0.105941101	0.120287392	0.029497417	0.596863071	0.999885054	FALSE
987	PF3D7_0800100.iso1.exon2.amp2_4269	-0.668008819	-0.631565738	0.119768108	0.036443081	0.598436265	0.999885054	FALSE
2314	PF3D7_1352700.iso1.exon1.amp2_2842	-0.731752416	-0.686787212	0.11945953	0.044965204	0.599372079	0.999885054	FALSE
1920	PF3D7_1227100.e1s1_4898	-0.201520219	-0.164061869	0.119445729	0.03745835	0.599413948	0.999885054	FALSE
1116	PF3D7_0826100.s4_8588	0.431338881	0.409845631	0.119424653	-0.021493251	0.599477894	0.999885054	FALSE
895	PF3D7_0718000.e11s1_8030	-0.927989076	-0.905394791	0.119353859	0.022594285	0.599692706	0.999885054	FALSE
487	PF3D7_0500900.iso1.exon2.amp1_442	0.695542406	0.798421091	0.119256445	0.102878685	0.599988357	0.999885054	FALSE
323	PF3D7_0320500.1o1_8174	-0.022695012	-0.059998519	0.119231012	-0.037303507	0.600065558	0.999885054	FALSE
1696	PF3D7_1128300.e3s1_8903	-0.365969334	-0.394425262	0.119007224	-0.028455928	0.600745061	0.999885054	FALSE
1609	PF3D7_1111800.iso1.exon1.amp1_2132	-1.089265703	-1.120390721	0.118870052	-0.031125019	0.601161755	0.999885054	FALSE
2704	PF3D7_1460600.1o1_5813	-0.665848272	-0.62308294	0.118620517	0.042765333	0.601920136	0.999885054	FALSE
1550	PF3D7_1041000.iso1.exon2.amp1_1280	0.390882652	0.424870706	0.118585663	0.033988054	0.602026101	0.999885054	FALSE
838	PF3D7_0707200.iso1.exon1.amp1_1982	-0.618549724	-0.600021431	0.118521634	0.018528293	0.602220789	0.999885054	FALSE
2324	PF3D7_1354400.iso1.exon3.amp1_3220	-0.521481978	-0.50474819	0.118126191	0.016733788	0.603423856	0.999885054	FALSE
1583	PF3D7_1104200.e1s2_5379	-0.493815501	-0.477084187	0.118098507	0.016731314	0.603508124	0.999885054	FALSE
395	PF3D7_0408900.1.e3s1_7464	-0.474610414	-0.45010901	0.117725955	0.024501403	0.604642694	0.999885054	FALSE
1466	PF3D7_1021900.e1s2_5472	0.821605617	0.776599271	0.117724958	-0.045006347	0.604645732	0.999885054	FALSE
2007	PF3D7_1244500.1o1_7349	0.271563852	0.288450736	0.11770196	0.016886885	0.604715805	0.999885054	FALSE
2005	PF3D7_1244100.e1s2_5465	-0.487847126	-0.499607998	0.11756001	-0.011760872	0.605148398	0.999885054	FALSE
362	PF3D7_0402600.iso1.exon1.amp1_4449	0.216232655	0.275304431	0.117540019	0.059071776	0.605209333	0.999885054	FALSE
1433	PF3D7_1017000.e1s2_7193	-0.188655205	-0.159488619	0.117499895	0.029166586	0.605331642	0.999885054	FALSE
322	PF3D7_0320400.e1s3_6638	-0.632717293	-0.614468355	0.117366114	0.018248938	0.605739538	0.999885054	FALSE
498	PF3D7_0501900.iso1.exon2.amp1_2980	-0.604414151	-0.62562687	0.117323474	-0.021212719	0.605869573	0.999885054	FALSE
995	PF3D7_0800700.e1s1_6606	-0.291854273	-0.275810631	0.117298075	0.016043643	0.605947036	0.999885054	FALSE
707	PF3D7_0614000.iso1.exon1.amp1_157	-0.48559697	-0.504585255	0.117248277	-0.018988285	0.606098928	0.999885054	FALSE
952	PF3D7_0728000.e2_6530	-0.753264229	-0.771960358	0.117194653	-0.018696129	0.60626251	0.999885054	FALSE
256	PF3D7_0308300.e1s1_6328	-0.471066768	-0.510040995	0.117164118	-0.038974226	0.606355667	0.999885054	FALSE
643	PF3D7_0531400.iso1.exon1.amp2_1631	-0.481693455	-0.428383549	0.116790572	0.053309906	0.607495862	0.999885054	FALSE
2294	PF3D7_1348400.iso1.exon2.amp1_1215	-0.626534028	-0.609033061	0.116693727	0.017500967	0.607791635	0.999885054	FALSE
734	PF3D7_0620200.1o1_6128	0.167760665	0.10867632	0.11665412	-0.059084345	0.607912617	0.999885054	FALSE
2530	PF3D7_1430000.1o3_7284	-0.295603549	-0.309239922	0.11661169	-0.013636373	0.608042237	0.999885054	FALSE
339	PF3D7_0324900.iso1.exon2.amp1_2239	-0.028839061	0.014969031	0.116516736	0.043808092	0.608332361	0.999885054	FALSE
709	PF3D7_0614800.iso1.exon1.amp1_433	-0.750856883	-0.729637034	0.116502639	0.02121985	0.608375436	0.999885054	FALSE
2067	PF3D7_1300300.e2s1_8353	0.309325978	0.269928711	0.116438143	-0.039397267	0.608572546	0.999885054	FALSE
2391	PF3D7_1372700.iso1.exon2.amp1_3891	0.391500711	0.37162298	0.116358884	-0.019877731	0.608814808	0.999885054	FALSE
1310	PF3D7_0931800.e1s1_7757	-0.47350428	-0.456131779	0.116329744	0.017372501	0.608903891	0.999885054	FALSE
2261	PF3D7_1340800.iso1.exon2.amp1_2950	-0.709476572	-0.694051162	0.116286942	0.015425409	0.609034749	0.999885054	FALSE
1623	PF3D7_1114900.e1s1_7681	-0.372073657	-0.356500079	0.115864589	0.015573578	0.610326734	0.999885054	FALSE
2383	PF3D7_1368300.iso1.exon3.amp1_954	-0.874806634	-0.894075308	0.115863351	-0.019268674	0.610330521	0.999885054	FALSE
404	PF3D7_0410900.1o1_6799	0.56299669	0.601500885	0.11581016	0.038504194	0.610493328	0.999885054	FALSE
1711	PF3D7_1132300.1o1_5547	0.047324794	-0.012910495	0.115745611	-0.060235289	0.610690925	0.999885054	FALSE
1213	PF3D7_0908500.e17s1_8622	-0.514508742	-0.498225062	0.115734904	0.01628368	0.610723703	0.999885054	FALSE
163	PF3D7_0212700.1o1_4996	-0.493303577	-0.51342514	0.115662789	-0.020121563	0.610944504	0.999885054	FALSE
2211	PF3D7_1329200.iso1.exon1.amp1_2427	0.536229275	0.567008391	0.115472365	0.030779116	0.611527725	0.999885054	FALSE
245	PF3D7_0305100.e1s3_8820	-0.799426411	-0.782479311	0.115425727	0.016947099	0.611670607	0.999885054	FALSE
2414	PF3D7_1403100.iso1.exon1.amp2_4518	-0.405909063	-0.469973347	0.115364944	-0.064064284	0.611856848	0.999885054	FALSE
1319	PF3D7_0935600.1o2_7901	0.287621044	0.349004482	0.115148514	0.061383438	0.612520214	0.999885054	FALSE
1720	PF3D7_1134000.e1s1_6336	1.079145601	1.047017492	0.115078417	-0.032128109	0.612735138	0.999885054	FALSE
1214	PF3D7_0908500.e4s1_8616	-0.637149925	-0.675096201	0.114894148	-0.037946275	0.613300291	0.999885054	FALSE
516	PF3D7_0505100.iso1.exon2.amp1_507	-0.646056241	-0.598369203	0.114862075	0.047687039	0.613398688	0.999885054	FALSE
2571	PF3D7_1436400.e2_8570	0.045269875	0.009942243	0.114623343	-0.035327632	0.614131308	0.999885054	FALSE
509	PF3D7_0504400.iso1.exon1.amp1_2757	-0.433569676	-0.398451827	0.114614326	0.035117849	0.614158987	0.999885054	FALSE
1423	PF3D7_1015500.1o1_8772	-0.377900073	-0.277536759	0.114568537	0.100363314	0.614299556	0.999885054	FALSE
594	PF3D7_0520100.e1s1_8338	0.133675268	0.17751924	0.114440553	0.043843972	0.614692536	0.999885054	FALSE
2149	PF3D7_1316700.3o3_6177	0.060388902	0.118117553	0.114383369	0.057728651	0.61486816	0.999885054	FALSE
1962	PF3D7_1234700.iso1.exon2.amp1_2955	-0.110378788	-0.092756622	0.114357179	0.017622166	0.614948603	0.999885054	FALSE
1890	PF3D7_1219900.1o1_5820	-0.405066183	-0.374585177	0.114341187	0.030481006	0.614997723	0.999885054	FALSE
101	PF3D7_0202300.2o2_8437	-0.621642183	-0.676673943	0.114218255	-0.055031759	0.615375393	0.999885054	FALSE
1157	PF3D7_0833500.iso1.exon3.amp1_3614	0.975242647	1.022616351	0.114167779	0.047373704	0.615530496	0.999885054	FALSE
6	PF3D7_0100300.iso1.exon1.amp1_1010	0.210567997	0.173155334	0.114056238	-0.037412662	0.615873305	0.999885054	FALSE
1519	PF3D7_1036300.1o1_6786	-0.479251332	-0.423146772	0.113916766	0.05610456	0.616302089	0.999885054	FALSE
1972	PF3D7_1236100.e2s1_7758	0.177895008	0.135492775	0.113573764	-0.042402233	0.617357184	0.999885054	FALSE
1746	PF3D7_1137900.2o2_4737	0.102693937	0.140845191	0.113468321	0.038151254	0.617681708	0.999885054	FALSE
11	PF3D7_0100900.iso1.exon1.amp1_2446	0.660267145	0.682970684	0.113447983	0.022703539	0.617744312	0.999885054	FALSE
1373	PF3D7_1008000.s2_8597	0.045572433	0.070324096	0.113253724	0.024751663	0.618342421	0.999885054	FALSE
439	PF3D7_0419300.iso1.exon1.amp1_2162	0.06635938	0.050592099	0.113210776	-0.015767281	0.618474693	0.999885054	FALSE
259	PF3D7_0309000.iso1.exon1.amp1_144	0.11760959	0.080293605	0.113077858	-0.037315985	0.618884136	0.999885054	FALSE
2427	PF3D7_1405600.1o1_6718	0.005264995	0.030311409	0.113060212	0.025046413	0.618938504	0.999885054	FALSE
1574	PF3D7_1102800.iso1.exon1.amp1_671	1.682323403	1.746615444	0.112923162	0.064292041	0.619360827	0.999885054	FALSE
2695	PF3D7_1458200.iso1.exon2.amp1_1761	-0.540883696	-0.523229977	0.112887645	0.017653719	0.619470296	0.999885054	FALSE
368	PF3D7_0404600.s3_7434	1.432190759	1.414467305	0.112791518	-0.017723454	0.619766619	0.999885054	FALSE
1493	PF3D7_1030500.1o1_4988	-0.661117644	-0.641166185	0.112790728	0.019951459	0.619769056	0.999885054	FALSE
1082	PF3D7_0816600.e1s1_6325	-0.502257676	-0.476965538	0.112759624	0.025292138	0.619864953	0.999885054	FALSE
2770	PF3D7_1473700.iso1.exon1.amp1_251	0.087972391	0.114801391	0.112704599	0.026829	0.620034617	0.999885054	FALSE
2461	PF3D7_1411100.iso1.exon2.amp1_4379	-0.691330617	-0.669539224	0.112495471	0.021791393	0.620679644	0.999885054	FALSE
2803	PF3D7_1480000.iso1.exon2.amp1_2445	0.148930353	0.181029514	0.112445962	0.032099161	0.620832394	0.999885054	FALSE
1180	PF3D7_0903000.1o1_9002	-0.071650528	-0.043609754	0.111996128	0.028040774	0.622221072	0.999885054	FALSE
1544	PF3D7_1040300.iso1.exon2.amp1_997	0.822218875	0.877162974	0.11187334	0.054944099	0.622600385	0.999885054	FALSE
1591	PF3D7_1107400.iso1.exon1.amp1_3598	0.459398775	0.515164318	0.11179261	0.055765543	0.62284983	0.999885054	FALSE
131	PF3D7_0207200_6262	-0.632959141	-0.619017202	0.111755381	0.013941939	0.622964878	0.999885054	FALSE
2441	PF3D7_1408400.e1s1_5466	-0.371091974	-0.352661122	0.111699749	0.018430852	0.623136818	0.999885054	FALSE
61	PF3D7_0111300.iso1.exon1.amp1_1701	-0.437876317	-0.419497177	0.111496456	0.01837914	0.623765312	0.999885054	FALSE
2446	PF3D7_1408700.e2s1_6634	-0.521551446	-0.545006634	0.111469499	-0.023455189	0.623848674	0.999885054	FALSE
1774	PF3D7_1144500.1o1_6422	-0.60938269	-0.593598141	0.111468913	0.015784549	0.623850486	0.999885054	FALSE
1683	PF3D7_1126100.iso1.exon2.amp2_220	-0.320690109	-0.2814468	0.111466129	0.039243309	0.623859096	0.999885054	FALSE
2605	PF3D7_1442400.e1s3_8666	-0.491813007	-0.52628864	0.111260008	-0.034475633	0.624496679	0.999885054	FALSE
27	PF3D7_0103900.1o1_9076	0.026300412	0.113783786	0.111188314	0.087483374	0.624718517	0.999885054	FALSE
1147	PF3D7_0832000.iso1.exon3.amp1_1848	-0.615244841	-0.587099398	0.111075705	0.028145443	0.625067032	0.999885054	FALSE
1244	PF3D7_0916200.iso1.exon2.amp1_2241	-0.383653705	-0.411689723	0.111050276	-0.028036018	0.625145747	0.999885054	FALSE
1978	PF3D7_1237400.e3_7403	-0.265500304	-0.233796308	0.111045957	0.031703996	0.625159114	0.999885054	FALSE
503	PF3D7_0502800.1o1_6679	-0.922830066	-0.900916344	0.111038594	0.021913722	0.625181909	0.999885054	FALSE
2768	PF3D7_1473200.e1s1_4868	0.001481662	0.041793992	0.110478182	0.040312331	0.626917824	0.999885054	FALSE
1036	PF3D7_0806800.e1s1_8932	-0.214180365	-0.154243485	0.110469543	0.059936881	0.626944603	0.999885054	FALSE
227	PF3D7_0302200.9o9_6812	-0.288704362	-0.274942422	0.110442236	0.01376194	0.627029245	0.999885054	FALSE
773	PF3D7_0628200.s1_6574	-0.403652589	-0.388931244	0.109843494	0.014721345	0.628886514	0.999885054	FALSE
760	PF3D7_0626800.iso1.exon1.amp1_2938	-0.433243476	-0.447736037	0.109797597	-0.014492561	0.629028992	0.999885054	FALSE
1211	PF3D7_0908400.2o2_5815	-0.501915851	-0.519542768	0.109782039	-0.017626917	0.629077291	0.999885054	FALSE
2690	PF3D7_1457300.e1s1_5185	-0.308492344	-0.286985302	0.10950952	0.021507042	0.629923593	0.999885054	FALSE
152	PF3D7_0210600.3o5_4701	-0.171713193	-0.22381096	0.109430376	-0.052097767	0.630169469	0.999885054	FALSE
2346	PF3D7_1359000.iso1.exon1.amp4_3637	-0.489878976	-0.517551945	0.109388273	-0.027672969	0.63030029	0.999885054	FALSE
1691	PF3D7_1127600.iso1.exon2.amp1_349	-0.289420291	-0.269351225	0.109134572	0.020069066	0.631088843	0.999885054	FALSE
1995	PF3D7_1240900.iso1.exon4.amp2_3972	-0.34986861	-0.335120946	0.108994764	0.014747664	0.631523587	0.999885054	FALSE
2655	PF3D7_1451400.iso1.exon1.amp1_seg1_3165	0.042615199	-0.03162502	0.108874536	-0.074240219	0.631897557	0.999885054	FALSE
2723	PF3D7_1465700.iso1.exon7.amp1_2640	-0.227556538	-0.215573964	0.108822028	0.011982574	0.632060914	0.999885054	FALSE
1573	PF3D7_1102700.iso1.exon1.amp1_375	-0.312531489	-0.347986004	0.108667122	-0.035454515	0.632542955	0.999885054	FALSE
1949	PF3D7_1232700.iso1.exon1.amp1_3259	-0.61862596	-0.561135198	0.108610485	0.057490762	0.632719244	0.999885054	FALSE
616	PF3D7_0524700.1o1_6961	-0.618923911	-0.6029389	0.10852187	0.015985011	0.63299511	0.999885054	FALSE
1236	PF3D7_0913500.3o3_7012	-0.524677783	-0.511684433	0.108451764	0.01299335	0.633213395	0.999885054	FALSE
20	PF3D7_0102200.e2s2_7188	0.807590243	0.912119897	0.108266027	0.104529653	0.633791883	0.999885054	FALSE
399	PF3D7_0409600.iso1.exon1.amp2_1059	-0.244457995	-0.220518367	0.10817337	0.023939628	0.634080558	0.999885054	FALSE
1059	PF3D7_0809900.iso1.exon1.amp2_seg2_576	-0.324796169	-0.349594222	0.10810948	-0.024798053	0.634279645	0.999885054	FALSE
2483	PF3D7_1417200.e1s1_5409	-0.055392074	-0.023468242	0.108032825	0.031923832	0.634518545	0.999885054	FALSE
549	PF3D7_0510800.1o1_4938	0.112105831	0.077139114	0.107959547	-0.034966716	0.634746959	0.999885054	FALSE
1723	PF3D7_1134300.iso1.exon1.amp2_4583	-0.034441394	-0.025532856	0.107859503	0.008908537	0.635058867	0.999885054	FALSE
437	PF3D7_0419100.iso1.exon1.amp1_2401	-0.592084845	-0.573905566	0.107856928	0.018179279	0.635066895	0.999885054	FALSE
104	PF3D7_0202600.iso2.exon1.amp1_2518	-0.508569356	-0.525751515	0.107830628	-0.017182159	0.635148902	0.999885054	FALSE
1381	PF3D7_1009000.1o1_8727	0.184470496	0.234683914	0.107747695	0.050213418	0.635407531	0.999885054	FALSE
268	PF3D7_0310500.e1s2_7206	0.505678765	0.567485708	0.107745877	0.061806943	0.635413203	0.999885054	FALSE
1438	PF3D7_1017900.e2s1_5746	-0.544792835	-0.526806765	0.107697375	0.01798607	0.635564481	0.999885054	FALSE
1172	PF3D7_0901800.2o2_8725	0.767306189	0.807931698	0.107690999	0.040625508	0.635584368	0.999885054	FALSE
1945	PF3D7_1232000.1o2_6457	-0.583059131	-0.568333197	0.107488613	0.014725933	0.636215798	0.999885054	FALSE
2394	PF3D7_1373100.iso1.exon1.amp1_3029	-0.181636284	-0.167117892	0.107466343	0.014518392	0.636285296	0.999885054	FALSE
1778	PF3D7_1145400.e1s1_8368	-0.330105116	-0.295508279	0.107445524	0.034596837	0.636350269	0.999885054	FALSE
546	PF3D7_0510100.iso1.exon1.amp2_4582	-0.380753917	-0.363138297	0.107422528	0.01761562	0.636422041	0.999885054	FALSE
969	PF3D7_0730900.e1s1_8316	-0.355800424	-0.379988766	0.107356508	-0.024188342	0.636628112	0.999885054	FALSE
1816	PF3D7_1202200_6847	-0.776829921	-0.733230712	0.10702327	0.043599209	0.637668721	0.999885054	FALSE
1256	PF3D7_0918900.e1s2_7481	-0.225329883	-0.203273151	0.10700018	0.022056733	0.637740852	0.999885054	FALSE
2373	PF3D7_1365300.1o1_5331	-0.27369014	-0.232222344	0.106992831	0.041467795	0.637763811	0.999885054	FALSE
2024	PF3D7_1248800.iso1.exon1.amp1_960	0.411019293	0.472543753	0.106692338	0.061524459	0.638702893	0.999885054	FALSE
2012	PF3D7_1246100.iso1.exon1.amp1_742	-0.35555259	-0.321259403	0.106594645	0.034293187	0.639008332	0.999885054	FALSE
679	PF3D7_0605600.iso1.exon4.amp1_4428	-0.24040507	-0.206247728	0.106538461	0.034157342	0.639184022	0.999885054	FALSE
2409	PF3D7_1401600.e3s1_6324	-0.529488988	-0.479819833	0.106517346	0.049669155	0.639250057	0.999885054	FALSE
824	PF3D7_0704200.iso1.exon1.amp2_769	-0.109310193	-0.162338251	0.106494226	-0.053028057	0.639322363	0.999885054	FALSE
1839	PF3D7_1207600.1o1_4730	-0.235257137	-0.202447285	0.106428718	0.032809852	0.639527259	0.999885054	FALSE
997	PF3D7_0801000.e2s1_5460	0.323071253	0.286352425	0.106377451	-0.036718828	0.63968763	0.999885054	FALSE
494	PF3D7_0501500.e1s1_8931	-0.523730778	-0.476400676	0.106340488	0.047330102	0.639803268	0.999885054	FALSE
1344	PF3D7_1000300.iso1.exon1.amp1_3601	0.002597403	0.035958998	0.106269456	0.033361594	0.640025517	0.999885054	FALSE
703	PF3D7_0612700.1o1_6423	-0.58149199	-0.613674411	0.106267875	-0.032182421	0.640030464	0.999885054	FALSE
698	PF3D7_0610000.iso1.exon2.amp1_2117	-0.511707942	-0.534072589	0.106261409	-0.022364647	0.640050699	0.999885054	FALSE
2214	PF3D7_1329500.iso1.exon3.amp1_730	1.173078031	1.131224635	0.105940696	-0.041853397	0.641054616	0.999885054	FALSE
98	PF3D7_0201800.iso1.exon2.amp1_3566	-0.529226419	-0.555160977	0.105840657	-0.025934558	0.641367911	0.999885054	FALSE
841	PF3D7_0707500.iso1.exon1.amp2_467	-0.714409203	-0.697861261	0.105718334	0.016547942	0.641751089	0.999885054	FALSE
1108	PF3D7_0825200.iso1.exon1.amp1_2065	-0.594908748	-0.580416953	0.105564588	0.014491795	0.642232841	0.999885054	FALSE
2580	PF3D7_1439000.1o2_6977	-0.246310597	-0.222178961	0.105450392	0.024131636	0.642590773	0.999885054	FALSE
2085	PF3D7_1302600.1o1_4710	0.14180767	0.176474749	0.105371779	0.034667078	0.642837228	0.999885054	FALSE
1807	PF3D7_1200400.iso1.exon2.amp1_720	0.61319631	0.576856788	0.105109436	-0.036339523	0.643659987	0.999885054	FALSE
1943	PF3D7_1231500.1o1_4656	-0.730166979	-0.751132278	0.105064941	-0.0209653	0.643799582	0.999885054	FALSE
1058	PF3D7_0809900.iso1.exon1.amp1_seg2_287	-0.239759225	-0.220795548	0.105063436	0.018963677	0.643804303	0.999885054	FALSE
1349	PF3D7_1001600.2o2_4757	-0.373491781	-0.356701047	0.105050096	0.016790734	0.643846156	0.999885054	FALSE
321	PF3D7_0320200.iso1.exon1.amp1_3627	0.164156646	0.123080083	0.104782229	-0.041076564	0.644686838	0.999885054	FALSE
1504	PF3D7_1033800.8o8_9037	-0.127123589	-0.149133083	0.104769577	-0.022009494	0.644726556	0.999885054	FALSE
1046	PF3D7_0808600.e1s2_6520	-0.471912366	-0.456250629	0.104744793	0.015661737	0.644804368	0.999885054	FALSE
1620	PF3D7_1113700.e1s1_8346	0.565937959	0.504406498	0.104575713	-0.061531461	0.645335307	0.999885054	FALSE
2663	PF3D7_1452900.e3s1_6021	-0.452518695	-0.437185551	0.104486709	0.015333144	0.645614876	0.999885054	FALSE
531	PF3D7_0508400.4o4_6424	-0.602883564	-0.621347111	0.104404385	-0.018463547	0.645873509	0.999885054	FALSE
687	PF3D7_0607600.1o5_6489	-0.218903749	-0.17421612	0.10437629	0.04468763	0.645961782	0.999885054	FALSE
2406	PF3D7_1401400.1o1_7256	-0.780550152	-0.745149278	0.104324343	0.035400874	0.646125017	0.999885054	FALSE
1131	PF3D7_0828500.4o4_8157	-0.913803039	-0.950322665	0.104156415	-0.036519626	0.646652821	0.999885054	FALSE
1397	PF3D7_1012400.e3s1_5724	-0.489276342	-0.47221923	0.104128931	0.017057112	0.646739223	0.999885054	FALSE
458	PF3D7_0422100 (renamed)_7011	1.868137825	1.931418242	0.104127087	0.063280418	0.64674502	0.999885054	FALSE
255	PF3D7_0308100.iso1.exon1.amp2_3062	-0.652395087	-0.613000677	0.103996384	0.03939441	0.647155986	0.999885054	FALSE
2164	PF3D7_1320000.e1s1_5757	-0.672073419	-0.685480909	0.103958273	-0.01340749	0.647275838	0.999885054	FALSE
1677	PF3D7_1125300.iso1.exon1.amp2_3352	0.753894013	0.840508368	0.103888536	0.086614355	0.647495175	0.999885054	FALSE
2684	PF3D7_1456100.1o1_7024	-0.280891332	-0.253988952	0.103715662	0.02690238	0.648039042	0.999885054	FALSE
557	PF3D7_0511600.1o1_5809	-0.009520136	0.087591929	0.103554602	0.097112065	0.648545926	0.999885054	FALSE
2347	PF3D7_1359300.iso1.exon1.amp1_4593	-0.509693882	-0.561081694	0.103430561	-0.051387811	0.648936422	0.999885054	FALSE
2641	PF3D7_1448500.e1s3_8592	-0.642511069	-0.670368717	0.103347394	-0.027857648	0.649198302	0.999885054	FALSE
2412	PF3D7_1402300.1o1_7339	-0.527562687	-0.55301978	0.103270357	-0.025457094	0.649440918	0.999885054	FALSE
719	PF3D7_0617700.iso1.exon1.amp1_3596	0.600904962	0.556012732	0.103265974	-0.04489223	0.649454725	0.999885054	FALSE
194	PF3D7_0221600.1o1_5812	0.176243959	0.221210703	0.103170648	0.044966744	0.649755002	0.999885054	FALSE
371	PF3D7_0404800.1o2_6179	-0.746855748	-0.761599343	0.103168128	-0.014743595	0.649762939	0.999885054	FALSE
668	PF3D7_0603100.1o1_7881	-0.619717484	-0.592233559	0.103158128	0.027483924	0.649794443	0.999885054	FALSE
1646	PF3D7_1119900.iso1.exon1.amp1_3728	0.06824505	0.03862692	0.102821839	-0.029618129	0.65085427	0.999885054	FALSE
1619	PF3D7_1113000.iso1.exon7.amp3_1351	0.006665601	-0.022710833	0.102707629	-0.029376434	0.65121438	0.999885054	FALSE
2467	PF3D7_1412600.1o1_5003	-0.393482925	-0.373419405	0.10257063	0.02006352	0.651646461	0.999885054	FALSE
1958	PF3D7_1233800.3o3_4664	-0.632433972	-0.607795243	0.102555929	0.024638729	0.651692835	0.999885054	FALSE
2075	PF3D7_1301500.2o2_8722	0.468239746	0.529878792	0.102387192	0.061639046	0.652225205	0.999885054	FALSE
718	PF3D7_0617600.iso1.exon1.amp1_3292	0.811244855	0.874459069	0.102357665	0.063214214	0.652318385	0.999885054	FALSE
338	PF3D7_0324900.iso1.exon1.amp1_2456	0.855185091	0.882036987	0.102301819	0.026851895	0.652494634	0.999885054	FALSE
979	PF3D7_0732400.iso1.exon1.amp1_2443	-0.36037354	-0.391012371	0.10211551	-0.030638831	0.653082773	0.999885054	FALSE
129	PF3D7_0207000.e1_7116	0.66922246	0.722972337	0.101980803	0.053749877	0.653508163	0.999885054	FALSE
2332	PF3D7_1356400.iso1.exon1.amp2_3669	-0.125730432	-0.083928428	0.101973842	0.041802004	0.653530146	0.999885054	FALSE
2239	PF3D7_1334400.1o1_8728	0.528954602	0.507727667	0.101931108	-0.021226935	0.653665123	0.999885054	FALSE
2680	PF3D7_1455100.iso1.exon1.amp1_4426	-0.323927956	-0.310350682	0.101915011	0.013577275	0.653715968	0.999885054	FALSE
1485	PF3D7_1028000.iso1.exon2.amp1_1224	-0.421389975	-0.435754681	0.101880317	-0.014364706	0.653825563	0.999885054	FALSE
423	PF3D7_0415300.iso1.exon1.amp1_4554	-0.11909386	-0.079152084	0.101819061	0.039941776	0.654019083	0.999885054	FALSE
705	PF3D7_0613300.iso1.exon5.amp1_2341	-0.575115276	-0.561711048	0.101794064	0.013404228	0.654098063	0.999885054	FALSE
2342	PF3D7_1358600.iso1.exon1.amp1_1754	-0.154028208	-0.187493257	0.101773009	-0.033465049	0.654164588	0.999885054	FALSE
1048	PF3D7_0808700.iso1.exon1.amp1_3035	0.629594419	0.604105244	0.101717748	-0.025489174	0.654339208	0.999885054	FALSE
612	PF3D7_0524200.iso1.exon1.amp1_3223	-0.317721384	-0.295298103	0.101677726	0.022423281	0.654465686	0.999885054	FALSE
1003	PF3D7_0802000.e1s1_5197	-0.074038866	-0.024475164	0.101667142	0.049563702	0.654499135	0.999885054	FALSE
1204	PF3D7_0906500.1o1_4999	1.248081332	1.322194685	0.101659512	0.074113353	0.654523252	0.999885054	FALSE
2585	PF3D7_1439700.5o6_4687	-0.137643952	-0.177858312	0.101646341	-0.04021436	0.654564877	0.999885054	FALSE
231	PF3D7_0302200.e9_5390	-0.357620638	-0.318832968	0.101566193	0.03878767	0.654818213	0.999885054	FALSE
910	PF3D7_0719400.s1_5695	-0.898151176	-0.867023931	0.101311149	0.031127245	0.655624652	0.999885054	FALSE
1405	PF3D7_1013200.iso1.exon1.amp2_2506	-0.244106911	-0.206779611	0.101272714	0.0373273	0.655746217	0.999885054	FALSE
2212	PF3D7_1329500.iso1.exon1.amp1_4532	-0.582486398	-0.607495122	0.100780501	-0.025008724	0.657303928	0.999885054	FALSE
2480	PF3D7_1416600.e1s2_8079	-0.819614929	-0.781895838	0.1006278	0.037719091	0.657787509	0.999885054	FALSE
2642	PF3D7_1448500.e1s4_8593	0.062106183	0.010327725	0.100594839	-0.051778458	0.657891912	0.999885054	FALSE
2491	PF3D7_1417600.iso1.exon1.amp3_1095	-0.572310112	-0.549520372	0.100550922	0.02278974	0.658031029	0.999885054	FALSE
181	PF3D7_0218300.1o4_6226	-0.726627473	-0.712124117	0.100465318	0.014503356	0.658302237	0.999885054	FALSE
2465	PF3D7_1412200.iso1.exon2.amp1_1899	-0.194973355	-0.166887051	0.100359945	0.028086304	0.658636139	0.999885054	FALSE
311	PF3D7_0318200.e1s3_5066	0.67285755	0.717360385	0.100246413	0.044502836	0.658995982	0.999885054	FALSE
1739	PF3D7_1136900.e1s1_7134	0.239341286	0.260468626	0.100000284	0.02112734	0.659776383	0.999885054	FALSE
2051	PF3D7_1254200.iso1.exon2.amp1_1290	0.253825906	0.208749587	0.099942302	-0.045076319	0.659960284	0.999885054	FALSE
248	PF3D7_0305500.e1s3_9107	-0.448057475	-0.39102045	0.099798929	0.057037024	0.660415118	0.999885054	FALSE
56	PF3D7_0110600.e3_5665	-0.367291742	-0.343067751	0.099599709	0.024223991	0.661047343	0.999885054	FALSE
2057	PF3D7_1254800.iso1.exon1.amp1_3017	-0.425462893	-0.363406692	0.099549354	0.062056201	0.661207186	0.999885054	FALSE
222	PF3D7_0301700.e2s1_8045	0.205238696	0.138420209	0.09952264	-0.066818487	0.66129199	0.999885054	FALSE
1149	PF3D7_0832400.iso1.exon3.amp1_1853	-0.155451484	-0.073774806	0.099498433	0.081676678	0.661368843	0.999885054	FALSE
2629	PF3D7_1446700.1o8_8122	-0.19206658	-0.114926335	0.099409467	0.077140245	0.661651319	0.999885054	FALSE
2363	PF3D7_1362900.iso1.exon2.amp1_3894	-0.453069944	-0.432415039	0.099380833	0.020654905	0.661742246	0.999885054	FALSE
2582	PF3D7_1439100.e1s1_5480	-0.522972992	-0.495781482	0.099304337	0.02719151	0.661985187	0.999885054	FALSE
1123	PF3D7_0827100.s2_5089	-0.305850321	-0.255022011	0.099207161	0.05082831	0.662293857	0.999885054	FALSE
930	PF3D7_0723900.e1s2_5176	-0.31687801	-0.255673076	0.099170496	0.061204934	0.662410336	0.999885054	FALSE
73	PF3D7_0113800.2o4_7664	0.249555185	0.299688531	0.098996049	0.050133347	0.662964651	0.999885054	FALSE
851	PF3D7_0709700.e1s1_7479	-0.188968843	-0.12728178	0.098927198	0.061687063	0.663183486	0.999885054	FALSE
30	PF3D7_0104100.2o2_5342	-0.34804381	-0.281020853	0.098924452	0.067022957	0.663192213	0.999885054	FALSE
1987	PF3D7_1239700.e1s1_5983	0.302886791	0.336271119	0.098744975	0.033384328	0.663762802	0.999885054	FALSE
855	PF3D7_0709900.e3_5674	-0.001533927	0.018561039	0.098647708	0.020094965	0.664072121	0.999885054	FALSE
1078	PF3D7_0815500.3o5_7032	0.929121122	0.958451731	0.098441326	0.029330609	0.664728639	0.999885054	FALSE
1767	PF3D7_1142800_7136	-0.221912348	-0.262992941	0.098421283	-0.041080592	0.664792411	0.999885054	FALSE
1910	PF3D7_1223800.iso1.exon1.amp1_short_2872	-0.138513567	-0.102949709	0.098353116	0.035563857	0.665009325	0.999885054	FALSE
515	PF3D7_0505100.iso1.exon1.amp2_3685	-0.009866799	-0.057300402	0.098339425	-0.047433603	0.665052896	0.999885054	FALSE
2088	PF3D7_1303100.e2_9139	-0.519894543	-0.502228044	0.09823912	0.017666499	0.66537214	0.999885054	FALSE
934	PF3D7_0725100.e1s1_5471	-0.671778686	-0.693816489	0.098181515	-0.022037803	0.665555513	0.999885054	FALSE
1030	PF3D7_0806500.e1s1_5475	-0.403127177	-0.446128551	0.097734927	-0.043001374	0.666977851	0.999885054	FALSE
296	PF3D7_0316300.1.e3_6827	-0.579149286	-0.547461914	0.097690302	0.031687372	0.667120048	0.999885054	FALSE
176	PF3D7_0216700.iso2.exon6.amp1_679	0.281250186	0.241444971	0.097613501	-0.039805216	0.667364805	0.999885054	FALSE
497	PF3D7_0501800.e1s2_6042	0.457428875	0.507254225	0.097612721	0.04982535	0.66736729	0.999885054	FALSE
202	PF3D7_0223100.iso1.exon2.amp1_989	-0.048591012	-0.033394178	0.097560632	0.015196834	0.667533315	0.999885054	FALSE
1050	PF3D7_0808800.iso1.exon1.amp1_3594	-0.124631231	-0.197350943	0.097537164	-0.072719712	0.66760812	0.999885054	FALSE
2043	PF3D7_1252700.2o2_8754	-0.314372959	-0.250350219	0.097413065	0.06402274	0.668003752	0.999885054	FALSE
721	PF3D7_0618700.1o2_6708	0.69876915	0.723228007	0.097339063	0.024458857	0.668239721	0.999885054	FALSE
2118	PF3D7_1309400.iso1.exon1.amp1_4008	-0.393389327	-0.323222911	0.097335793	0.070166416	0.668250149	0.999885054	FALSE
1788	PF3D7_1148900.iso1.exon1.amp1_1825	-0.307988191	-0.371063438	0.097162577	-0.063075247	0.66880262	0.999885054	FALSE
639	PF3D7_0530900.iso1.exon1.amp1_818	-0.148782374	-0.124421848	0.096951129	0.024360526	0.669477296	0.999885054	FALSE
820	PF3D7_0703500.e2s2_7503	1.681096195	1.74746709	0.09688833	0.066370895	0.669677728	0.999885054	FALSE
2015	PF3D7_1246900.iso1.exon1.amp1_721	-0.090229656	-0.06307287	0.096834023	0.027156786	0.669851075	0.999885054	FALSE
1047	PF3D7_0808600.e2s1_8343	0.781795097	0.757596161	0.096725395	-0.024198936	0.670197875	0.999885054	FALSE
2558	PF3D7_1435300.e1s3_7217	-0.520026456	-0.496692324	0.096717063	0.023334132	0.670224476	0.999885054	FALSE
160	PF3D7_0212300.e3s1_4883	-0.491361044	-0.448568595	0.096667431	0.042792449	0.670382957	0.999885054	FALSE
438	PF3D7_0419200.1o1_6384	-1.019551632	-1.031538472	0.096572882	-0.01198684	0.670684903	0.999885054	FALSE
1861	PF3D7_1212000.e2s1_5966	-0.514448279	-0.496778641	0.096567337	0.017669638	0.670702614	0.999885054	FALSE
1617	PF3D7_1113000.iso1.exon3.amp1_1542	-0.407465573	-0.462437417	0.096385936	-0.054971844	0.671282094	0.999885054	FALSE
1235	PF3D7_0912900.e2s1_6018	-0.326958744	-0.292594897	0.09622662	0.034363846	0.671791201	0.999885054	FALSE
2076	PF3D7_1301600.iso1.exon4.amp2_1680	0.287555112	0.372928941	0.095981756	0.085373829	0.672573999	0.999885054	FALSE
754	PF3D7_0625000.iso2.exon1.amp1_1527	0.196265095	0.142873096	0.095928539	-0.053391999	0.672744177	0.999885054	FALSE
2576	PF3D7_1438000.e1s1_7787	-0.672102401	-0.70021413	0.095783464	-0.028111729	0.673208193	0.999885054	FALSE
712	PF3D7_0615800.2o3_6521	-0.669138178	-0.651316258	0.095737278	0.01782192	0.673355946	0.999885054	FALSE
39	PF3D7_0108000.e1s1_7463	-0.463213811	-0.44958126	0.095468923	0.013632551	0.674214699	0.999885054	FALSE
112	PF3D7_0203800.iso1.exon12.amp1_2119	-0.225368224	-0.200893486	0.09545406	0.024474738	0.674262277	0.999885054	FALSE
2670	PF3D7_1453600.iso1.exon1.amp1_1194	-0.416281966	-0.435667814	0.095443239	-0.019385848	0.674296913	0.999885054	FALSE
1329	PF3D7_0936600.2o2_6426	-0.584009266	-0.597798298	0.095388732	-0.013789031	0.674471405	0.999885054	FALSE
372	PF3D7_0404800.e1_7407	-0.743426979	-0.71343939	0.095181603	0.029987589	0.675134653	0.999885054	FALSE
2208	PF3D7_1329000.e1s2_6850	0.125283203	0.095404003	0.095149824	-0.0298792	0.675236437	0.999885054	FALSE
2604	PF3D7_1442300.e2s1_8352	-0.287506053	-0.346574762	0.0949602	-0.059068709	0.675843907	0.999885054	FALSE
1264	PF3D7_0920400.s1_5698	-0.724926092	-0.716155047	0.094838938	0.008771046	0.676232497	0.999885054	FALSE
463	PF3D7_0422500.e1s3_5652	0.090136515	0.146904219	0.094640892	0.056767704	0.676867344	0.999885054	FALSE
326	PF3D7_0321500.iso1.exon1.amp1_841	-0.585011189	-0.601277677	0.094570047	-0.016266487	0.677094502	0.999885054	FALSE
860	PF3D7_0710500.iso1.exon5.amp1_1229	-0.601276298	-0.618186074	0.094553804	-0.016909776	0.677146589	0.999885054	FALSE
1245	PF3D7_0916200.iso1.exon2.amp2_1904	-0.413378024	-0.423533824	0.094471009	-0.010155801	0.677412114	0.999885054	FALSE
114	PF3D7_0204100.iso1.exon1.amp2_536	-0.339820142	-0.370124713	0.094411981	-0.030304572	0.677601441	0.999885054	FALSE
661	PF3D7_0602000.iso1.exon1.amp2_4515	-0.440343288	-0.464820823	0.094285534	-0.024477535	0.678007088	0.999885054	FALSE
2790	PF3D7_1477300.iso1.exon2.amp1_3285	-0.464225911	-0.448627778	0.094036935	0.015598134	0.678804895	0.999885054	FALSE
189	PF3D7_0220000.e2s1_7105	1.718101286	1.749796396	0.093688686	0.03169511	0.679923154	0.999885054	FALSE
1905	PF3D7_1223100.e3s1_6322	-0.69471102	-0.719193639	0.093680188	-0.024482619	0.67995045	0.999885054	FALSE
768	PF3D7_0628100.iso1.exon1.amp10_2250	-0.612448684	-0.601274747	0.093663403	0.011173937	0.680004371	0.999885054	FALSE
329	PF3D7_0322100.1o1_9067	-0.091715111	-0.124042831	0.093628756	-0.032327719	0.680115672	0.999885054	FALSE
334	PF3D7_0324100.2o2_5248	-0.104873003	-0.06747054	0.093606566	0.037402463	0.68018696	0.999885054	FALSE
270	PF3D7_0310700.2o2_7252	-0.611055003	-0.580579173	0.093562743	0.03047583	0.680327756	0.999885054	FALSE
525	PF3D7_0506900.1o1_6208	-0.597061066	-0.562974548	0.093411517	0.034086519	0.680813713	0.999885054	FALSE
873	PF3D7_0712800.iso1.exon2.amp2_1944	-0.755252024	-0.730892442	0.093409276	0.024359583	0.680820915	0.999885054	FALSE
1016	PF3D7_0804500.e2s2_5372	-0.426364922	-0.40476512	0.093378644	0.021599802	0.680919368	0.999885054	FALSE
50	PF3D7_0109800.1o1_7336	-0.427753053	-0.365946594	0.093359643	0.061806459	0.680980442	0.999885054	FALSE
2392	PF3D7_1372800.iso1.exon2.amp1_3009	1.06429053	1.112887366	0.093281838	0.048596836	0.681230545	0.999885054	FALSE
107	PF3D7_0203000.iso1.exon1.amp2_1055	-0.124577431	-0.045051495	0.093184117	0.079525935	0.681544723	0.999885054	FALSE
981	PF3D7_0732700.iso1.exon2.amp1_712	1.3462625	1.402328219	0.093077436	0.056065718	0.681887773	0.999885054	FALSE
1279	PF3D7_0924200.iso1.exon1.amp1_2570	-0.426299976	-0.407850388	0.093014742	0.018449588	0.68208941	0.999885054	FALSE
209	PF3D7_0300100.iso1.exon2.amp1_138	1.528888884	1.549920787	0.092964409	0.021031903	0.68225131	0.999885054	FALSE
1419	PF3D7_1014800.7o11_8498	-0.187398503	-0.174400832	0.092890912	0.012997672	0.682487747	0.999885054	FALSE
692	PF3D7_0608400.iso1.exon2.amp1_1521	-0.223401647	-0.293477761	0.092889953	-0.070076115	0.682490829	0.999885054	FALSE
566	PF3D7_0513700.e3s1_8904	-0.733123506	-0.720546154	0.092872035	0.012577352	0.682548479	0.999885054	FALSE
473	PF3D7_0425300.1o1_8130	-0.378872991	-0.363346764	0.092844808	0.015526227	0.682636077	0.999885054	FALSE
2226	PF3D7_1332000.iso1.exon2.amp1_1237	-0.142974641	-0.121114337	0.092739976	0.021860304	0.682973405	0.999885054	FALSE
1020	PF3D7_0804800.e1s1_5442	-0.421191462	-0.438577151	0.092710628	-0.017385689	0.683067851	0.999885054	FALSE
1559	PF3D7_1100200.e1s2_8548	-0.520941887	-0.535997399	0.092658554	-0.015055512	0.683235451	0.999885054	FALSE
1057	PF3D7_0809600.iso1.exon1.amp4_seg1_2308	-0.50037199	-0.475402937	0.092539207	0.024969053	0.68361963	0.999885054	FALSE
2081	PF3D7_1302200.1o1_6115	-0.713883255	-0.736605397	0.092503646	-0.022722142	0.683734117	0.999885054	FALSE
752	PF3D7_0624600.iso1.exon1.amp2_2263	-0.568072384	-0.55132684	0.092450795	0.016745545	0.683904282	0.999885054	FALSE
682	PF3D7_0606500.iso1.exon5.amp1_1589	-0.212892959	-0.254415468	0.092364644	-0.04152251	0.684181705	0.999885054	FALSE
1532	PF3D7_1037600.e3s1_6616	-0.740028725	-0.710773417	0.092333296	0.029255308	0.684282664	0.999885054	FALSE
1274	PF3D7_0923800.1.e1s1_7487	0.257426297	0.273760688	0.092184196	0.016334391	0.68476293	0.999885054	FALSE
1164	PF3D7_0900700.iso1.exon1.amp1_2726	-0.309115171	-0.281363147	0.091907949	0.027752024	0.685653115	0.999885054	FALSE
1356	PF3D7_1003400.iso1.exon1.amp3_seg2_2299	-0.350722231	-0.329104328	0.091751612	0.021617902	0.686157109	0.999885054	FALSE
2762	PF3D7_1472100.1o6_8139	-1.289223931	-1.311406469	0.091745916	-0.022182538	0.686175475	0.999885054	FALSE
622	PF3D7_0525300.1o1_6447	0.030471219	-0.00892886	0.09172202	-0.039400078	0.686252522	0.999885054	FALSE
1575	PF3D7_1103000.iso1.exon1.amp1_1212	-0.54397132	-0.556591499	0.091507492	-0.012620179	0.686944394	0.999885054	FALSE
1415	PF3D7_1014600 (renamed, has duplicates)_5653	-0.446277734	-0.414589138	0.091368765	0.031688596	0.687391954	0.999885054	FALSE
837	PF3D7_0706700.1o1_8234	-0.174446006	-0.151502942	0.091336114	0.022943064	0.68749731	0.999885054	FALSE
357	PF3D7_0402000 (renamed)_9038	-0.1732436	-0.123017359	0.091309806	0.050226242	0.687582202	0.999885054	FALSE
1669	PF3D7_1124000.2o5_7607	-0.453008121	-0.439230751	0.091266115	0.01377737	0.687723196	0.999885054	FALSE
2622	PF3D7_1445100.iso1.exon1.amp1_4020	-0.335553605	-0.315535665	0.091240824	0.02001794	0.687804818	0.999885054	FALSE
2733	PF3D7_1466600.iso1.exon1.amp1_2136	-0.66959602	-0.63201517	0.091203504	0.03758085	0.687925268	0.999885054	FALSE
291	PF3D7_0313800.5o5_7343	-0.098684144	-0.071229687	0.090991169	0.027454457	0.688610744	0.999885054	FALSE
1328	PF3D7_0936500.iso1.exon1.amp1_973	-0.636985872	-0.597620013	0.090946871	0.039365859	0.688753786	0.999885054	FALSE
864	PF3D7_0711200.iso1.exon1.amp1_2331	-0.645172131	-0.625781578	0.090820349	0.019390553	0.689162398	0.999885054	FALSE
1225	PF3D7_0910400.iso1.exon1.amp2_seg2_864	-0.338548683	-0.305394389	0.090812108	0.033154294	0.689189017	0.999885054	FALSE
89	PF3D7_0200600.iso1.exon1.amp1_2442	0.757794118	0.791191068	0.090770189	0.03339695	0.689324423	0.999885054	FALSE
753	PF3D7_0624900.iso1.exon8.amp1_2391	-0.518528895	-0.531620818	0.090766144	-0.013091924	0.68933749	0.999885054	FALSE
638	PF3D7_0530100.2o2_9005	1.40711574	1.452374996	0.090691985	0.045259255	0.689577061	0.999885054	FALSE
445	PF3D7_0419900.iso1.exon3.amp1_2826	-0.677488108	-0.642389461	0.090636015	0.035098648	0.689757896	0.999885054	FALSE
1150	PF3D7_0832800.iso1.exon3.amp1_1854	0.931044647	0.957024942	0.090631762	0.025980294	0.689771637	0.999885054	FALSE
1745	PF3D7_1137900.1o2_5315	-0.513785443	-0.502692683	0.090528503	0.01109276	0.690105313	0.999885054	FALSE
2036	PF3D7_1252300.iso1.exon2.amp1_1210	-0.044212825	-0.101840026	0.090505715	-0.057627201	0.690178959	0.999885054	FALSE
303	PF3D7_0317400.iso1.exon2.amp1_3902	-0.408664897	-0.382797206	0.090416993	0.025867691	0.690465723	0.999885054	FALSE
846	PF3D7_0708400.e2_6536	-0.804743482	-0.79522442	0.090408759	0.009519062	0.690492341	0.999885054	FALSE
652	PF3D7_0600300.iso1.exon1.amp1_1286	0.503153064	0.467886558	0.090355676	-0.035266506	0.690663941	0.999885054	FALSE
317	PF3D7_0319000.iso1.exon1.amp1_3432	-0.345849263	-0.316677074	0.090349063	0.029172189	0.690685319	0.999885054	FALSE
1340	PF3D7_0937800.iso1.exon1.amp1_2169	-0.361983875	-0.392657941	0.090258776	-0.030674066	0.690977228	0.999885054	FALSE
1894	PF3D7_1221000.e1s1_8662	-0.046635346	-0.074341518	0.090161011	-0.027706172	0.691293371	0.999885054	FALSE
526	PF3D7_0507200.iso1.exon1.amp1_150	-0.460686865	-0.445727639	0.090149983	0.014959226	0.691329035	0.999885054	FALSE
1843	PF3D7_1208100.e2s2_5482	-0.052825776	-0.067720868	0.090101673	-0.014895091	0.691485279	0.999885054	FALSE
1847	PF3D7_1209400.e1s1_8090	-0.24812684	-0.182105955	0.089965113	0.066020884	0.69192702	0.999885054	FALSE
1317	PF3D7_0933900.4o4_5828	0.149892319	0.194724738	0.089842597	0.04483242	0.692323429	0.999885054	FALSE
1999	PF3D7_1242800.e4s1_7480	-0.106671554	-0.090406663	0.089780721	0.01626489	0.692523664	0.999885054	FALSE
31	PF3D7_0104600.e1s1_7213	-0.833410921	-0.769258596	0.089525111	0.064152325	0.693351095	0.999885054	FALSE
1806	PF3D7_1200400.iso1.exon1.amp2_776	-0.415266064	-0.368162545	0.089435428	0.047103519	0.693641499	0.999885054	FALSE
2410	PF3D7_1401800.1o1_7880	-0.130724266	-0.052685305	0.089286625	0.078038961	0.694123449	0.999885054	FALSE
215	PF3D7_0300900.iso1.exon2.amp1_1555	-0.378645542	-0.353574973	0.089267531	0.025070569	0.694185303	0.999885054	FALSE
1647	PF3D7_1120300.2o2_8189	0.149205373	0.184126119	0.089137093	0.034920746	0.694607898	0.999885054	FALSE
642	PF3D7_0531100.iso1.exon1.amp2_seg2_3774	-0.603136304	-0.616884957	0.08908567	-0.013748653	0.694774525	0.999885054	FALSE
1277	PF3D7_0924000.iso1.exon1.amp2_3981	-0.552358578	-0.502313908	0.088980633	0.05004467	0.695114931	0.999885054	FALSE
147	PF3D7_0209300.1o2_6694	-0.410117485	-0.361899184	0.088958177	0.048218301	0.695187716	0.999885054	FALSE
2454	PF3D7_1409400.4o4_8117	-0.128565279	-0.075742997	0.088909836	0.052822282	0.695344411	0.999885054	FALSE
580	PF3D7_0517900.2o2_7334	-0.038567808	0.004389212	0.088799	0.04295702	0.695703728	0.999885054	FALSE
384	PF3D7_0406800.iso1.exon3.amp1_3542	-0.273017078	-0.291023362	0.088765584	-0.018006284	0.695812075	0.999885054	FALSE
57	PF3D7_0110700.e1s1_7186	-0.556794977	-0.580927352	0.088760574	-0.024132375	0.69582832	0.999885054	FALSE
111	PF3D7_0203200.1o1_5016	-0.159609734	-0.181248628	0.088749197	-0.021638894	0.69586521	0.999885054	FALSE
2133	PF3D7_1312900.iso1.exon3.amp1_1386	-0.39212795	-0.378203562	0.088391624	0.013924388	0.697025036	0.999885054	FALSE
1802	PF3D7_1150400.iso1.exon2.amp1_714	1.007106795	1.039196781	0.088237222	0.032089986	0.697526092	0.999885054	FALSE
2502	PF3D7_1420200_8303	-0.744864454	-0.760582043	0.08798488	-0.015717589	0.698345284	0.999885054	FALSE
993	PF3D7_0800400.iso1.exon3.amp1_128	-0.098712167	-0.074343486	0.087942531	0.024368681	0.698482804	0.999885054	FALSE
300	PF3D7_0317300.s2_8011	-0.283572806	-0.250656848	0.087726533	0.032915958	0.699184365	0.999885054	FALSE
2265	PF3D7_1342900.iso1.exon1.amp3_3417	-0.241420747	-0.212665019	0.08765876	0.028755728	0.69940455	0.999885054	FALSE
2459	PF3D7_1410600_6270	-0.106977385	-0.047894674	0.087646578	0.059082711	0.699444131	0.999885054	FALSE
1070	PF3D7_0813400.e2s1_6043	-0.297617988	-0.334874284	0.087555564	-0.037256296	0.699739871	0.999885054	FALSE
730	PF3D7_0619700.iso1.exon2.amp1_2417	-0.313259735	-0.333178489	0.087535381	-0.019918754	0.699805459	0.999885054	FALSE
1815	PF3D7_1201400.iso1.exon1.amp2_2193	0.319987331	0.355322891	0.087535231	0.03533556	0.699805947	0.999885054	FALSE
450	PF3D7_0420300.iso1.exon1.amp4_seg1_3445	-0.142446944	-0.10149495	0.087227282	0.040951994	0.700806997	0.999885054	FALSE
2724	PF3D7_1465800.e5s1_5418	-0.631874266	-0.606871815	0.086979775	0.02500245	0.701611974	0.999885054	FALSE
567	PF3D7_0514000.iso1.exon2.amp1_129	-0.277203833	-0.254211786	0.086959942	0.022992046	0.701676496	0.999885054	FALSE
1019	PF3D7_0804600.1o1_6746	-0.713390303	-0.678867947	0.086467646	0.034522356	0.703278744	0.999885054	FALSE
570	PF3D7_0514900.1o1_8458	-0.675506138	-0.687344722	0.086403057	-0.011838584	0.703489066	0.999885054	FALSE
1292	PF3D7_0928700.iso1.exon1.amp1_3151	-0.729830286	-0.685411691	0.086270574	0.044418595	0.703920544	0.999885054	FALSE
2202	PF3D7_1328200.iso1.exon1.amp2_seg1_277	0.779841165	0.829174761	0.0861374	0.049333596	0.704354378	0.999885054	FALSE
1227	PF3D7_0911100.e1s1_9127	-0.568707949	-0.541818898	0.086121837	0.026889051	0.704405086	0.999885054	FALSE
1144	PF3D7_0831500.iso1.exon3.amp1_1846	-0.699688058	-0.686663687	0.085975823	0.013024372	0.70488088	0.999885054	FALSE
1249	PF3D7_0917200.2o2_4677	-0.636384023	-0.592612713	0.085857867	0.043771311	0.705265336	0.999885054	FALSE
1056	PF3D7_0809500.iso1.exon1.amp1_3552	-0.507444883	-0.483372001	0.085800749	0.024072882	0.70545153	0.999885054	FALSE
1288	PF3D7_0927700.1o1_7283	-0.670945413	-0.657764517	0.085669959	0.013180896	0.705877958	0.999885054	FALSE
908	PF3D7_0719200.e1s1_7415	-0.577422103	-0.564267104	0.085615058	0.013154999	0.706056985	0.999885054	FALSE
787	PF3D7_0631400.iso1.exon1.amp1_1562	0.500341298	0.545808016	0.085549446	0.045466718	0.706270966	0.999885054	FALSE
906	PF3D7_0719000.1o1_5524	-0.059759824	0.00954118	0.085525255	0.069301004	0.706349865	0.999885054	FALSE
2377	PF3D7_1366200.1o1_7269	-0.469184691	-0.457101755	0.085455913	0.012082936	0.706576047	0.999885054	FALSE
2046	PF3D7_1253400.1o1_7644	-0.667148639	-0.619422838	0.085311613	0.0477258	0.707046816	0.999885054	FALSE
646	PF3D7_0532400.e1s1_5131	-0.940496477	-0.899512804	0.085245588	0.040983673	0.70726226	0.999885054	FALSE
2222	PF3D7_1331000.1o1_5311	-0.299958814	-0.250968041	0.085203572	0.048990774	0.707399372	0.999885054	FALSE
1325	PF3D7_0936200.2o2_4952	-0.394239151	-0.370286466	0.085179603	0.023952685	0.707477596	0.999885054	FALSE
1066	PF3D7_0812400.e1s1_6614	-0.299558481	-0.284400938	0.085165876	0.015157543	0.707522396	0.999885054	FALSE
1991	PF3D7_1240300.iso1.exon2.amp1_4487	0.674766686	0.694326331	0.08488837	0.019559645	0.708428318	0.999885054	FALSE
2625	PF3D7_1446400.1o1_6439	-0.735942849	-0.720405245	0.084715397	0.015537604	0.708993217	0.999885054	FALSE
1598	PF3D7_1108600.e1s1_6906	-0.284606042	-0.253446638	0.084657454	0.031159404	0.709182487	0.999885054	FALSE
2001	PF3D7_1243500.iso1.exon6.amp1_3243	-0.582612802	-0.594042997	0.08462136	-0.011430195	0.709300398	0.999885054	FALSE
2114	PF3D7_1308500.iso1.exon1.amp1_3021	0.114757282	0.131322605	0.084385732	0.016565323	0.710070319	0.999885054	FALSE
2666	PF3D7_1453200.iso1.exon14.amp1_4389	-0.619576934	-0.609157851	0.084373849	0.010419083	0.710109158	0.999885054	FALSE
1741	PF3D7_1137100_7714	-0.885196159	-0.839138701	0.08422013	0.046057458	0.710611623	0.999885054	FALSE
1925	PF3D7_1228100.iso1.exon3.amp1_2404	-0.481228128	-0.466588108	0.084076876	0.01464002	0.711080002	0.999885054	FALSE
1726	PF3D7_1134500.s2_6572	-1.019514138	-1.033253877	0.083952359	-0.013739739	0.71148722	0.999885054	FALSE
234	PF3D7_0302500.e9s1_6314	0.134941927	0.201500245	0.083875074	0.066558318	0.711740013	0.999885054	FALSE
986	PF3D7_0800100.iso1.exon2.amp1_3980	-0.550629398	-0.562669499	0.083869633	-0.012040101	0.711757812	0.999885054	FALSE
671	PF3D7_0604000.iso1.exon1.amp1_1983	-0.225155056	-0.163574114	0.083741649	0.061580942	0.712176518	0.999885054	FALSE
1299	PF3D7_0930200.iso1.exon4.amp1_2997	-0.459590716	-0.470177145	0.083700537	-0.010586428	0.712311037	0.999885054	FALSE
1635	PF3D7_1117800.iso1.exon1.amp1_264	-0.416269735	-0.428229179	0.08364882	-0.011959444	0.712480271	0.999885054	FALSE
1127	PF3D7_0827900.e2_7119	-0.072235371	-0.039096444	0.083647311	0.033138928	0.71248521	0.999885054	FALSE
22	PF3D7_0102600.2o3_6170	-0.379722927	-0.393454172	0.083515985	-0.013731245	0.712915017	0.999885054	FALSE
1158	PF3D7_0900100.iso1.exon2.amp1_151	1.269942495	1.25057226	0.083447433	-0.019370235	0.713139417	0.999885054	FALSE
2658	PF3D7_1451900.e1s2_6604	-0.035882523	-0.054596167	0.083273438	-0.018713644	0.713709092	0.999885054	FALSE
344	PF3D7_0400200.iso1.exon1.amp1_1876	1.249986195	1.2747263	0.083049801	0.024740105	0.714441554	0.999885054	FALSE
2233	PF3D7_1333500.iso1.exon1.amp1_2747	-0.90189989	-0.866432636	0.082937099	0.035467253	0.714810789	0.999885054	FALSE
1159	PF3D7_0900200.e2s1_8924	0.197970925	0.222139917	0.082865568	0.024168992	0.715045175	0.999885054	FALSE
420	PF3D7_0414900.e4s1_5677	-0.427964042	-0.398527842	0.082558973	0.0294362	0.716050124	0.999885054	FALSE
1563	PF3D7_1100500.iso1.exon1.amp1_699	-0.102420949	-0.127149148	0.082466958	-0.024728199	0.716351833	0.999885054	FALSE
2310	PF3D7_1352400.iso1.exon1.amp1_549	-0.566051633	-0.582027043	0.082461529	-0.015975409	0.716369636	0.999885054	FALSE
1169	PF3D7_0901400.iso1.exon2.amp1_711	-0.54086816	-0.53112337	0.081990156	0.00974479	0.717915992	0.999885054	FALSE
977	PF3D7_0732200.iso1.exon2.amp1_1297	0.909207194	0.894601683	0.081813217	-0.014605512	0.718496768	0.999885054	FALSE
1631	PF3D7_1116000.iso1.exon2.amp2_3382	0.018871314	0.108727676	0.081801098	0.089856361	0.718536553	0.999885054	FALSE
2304	PF3D7_1351300.2o2_5557	-0.439723501	-0.368559509	0.081775891	0.071163992	0.718619308	0.999885054	FALSE
533	PF3D7_0508600.iso1.exon1.amp1_3875	-0.329439453	-0.321106954	0.081732118	0.008332499	0.718763024	0.999885054	FALSE
972	PF3D7_0731200.2o2_8439	0.480502927	0.544033832	0.081681999	0.063530905	0.718927586	0.999885054	FALSE
2099	PF3D7_1305400.iso1.exon2.amp1_2469	0.11035713	0.090292589	0.081570538	-0.020064541	0.719293614	0.999885054	FALSE
2494	PF3D7_1418100.s3_9162	-0.580063673	-0.550332444	0.081469877	0.029731229	0.719624235	0.999885054	FALSE
2264	PF3D7_1342600.e3s1_6632	-0.359261735	-0.314276079	0.081444809	0.044985656	0.719706577	0.999885054	FALSE
2416	PF3D7_1404000.iso1.exon1.amp1_1548	-0.553346335	-0.570731813	0.081314984	-0.017385478	0.72013309	0.999885054	FALSE
953	PF3D7_0728200.2o2_7918	-0.354281551	-0.289054201	0.08123506	0.06522735	0.720395711	0.999885054	FALSE
748	PF3D7_0623700.iso1.exon1.amp2_4528	-0.220758181	-0.192662015	0.081175024	0.028096166	0.720593004	0.999885054	FALSE
853	PF3D7_0709900.e1s2_8563	-0.581408553	-0.562260877	0.081121532	0.019147676	0.720768809	0.999885054	FALSE
2403	PF3D7_1400700.iso1.exon1.amp1_2135	1.113701323	1.16653948	0.080997297	0.052838157	0.721177179	0.999885054	FALSE
2276	PF3D7_1345600.iso1.exon2.amp1_1550	0.195765211	0.159628966	0.08098727	-0.036136245	0.72121014	0.999885054	FALSE
1171	PF3D7_0901600.iso1.exon2.amp1_1269	0.393289983	0.353550821	0.080907793	-0.039739162	0.721471436	0.999885054	FALSE
1822	PF3D7_1203700.e3_8270	-0.357421673	-0.311050369	0.080892403	0.046371304	0.721522038	0.999885054	FALSE
1488	PF3D7_1028900.2o2_7542	-0.368827058	-0.356035578	0.080849594	0.01279148	0.7216628	0.999885054	FALSE
1509	PF3D7_1035000.1o1_8245	-0.466537539	-0.495054027	0.080789083	-0.028516488	0.721861786	0.999885054	FALSE
2799	PF3D7_1479600.iso1.exon2.amp1_139	-0.127657047	-0.142979316	0.080772812	-0.015322269	0.721915292	0.999885054	FALSE
2131	PF3D7_1312700.1o1_8786	-0.544876236	-0.577568966	0.080644769	-0.03269273	0.722336431	0.999885054	FALSE
1254	PF3D7_0918300.e2s1_6599	0.50437431	0.5901453	0.080459378	0.08577099	0.722946345	0.999885054	FALSE
1765	PF3D7_1141400.5o5_5552	-0.489595779	-0.475117918	0.080393678	0.014477861	0.723162538	0.999885054	FALSE
471	PF3D7_0425100.2o2_8127	0.632362506	0.661079246	0.080357163	0.028716741	0.723282701	0.999885054	FALSE
1697	PF3D7_1128500.1o1_8799	-0.350082236	-0.336902504	0.080288752	0.013179732	0.723507853	0.999885054	FALSE
876	PF3D7_0713000.iso1.exon2.amp1_2451	-0.39544693	-0.37530187	0.080207646	0.02014506	0.72377482	0.999885054	FALSE
1241	PF3D7_0915300.iso1.exon1.amp1_149	-0.496822572	-0.480076458	0.080165477	0.016746114	0.723913636	0.999885054	FALSE
817	PF3D7_0703100.1o1_5246	-0.068444412	-0.022321918	0.079930502	0.046122494	0.724687334	0.999885054	FALSE
1121	PF3D7_0826500.e1s2_5180	-0.077576397	-0.128515628	0.079917495	-0.050939231	0.724730169	0.999885054	FALSE
1889	PF3D7_1219800.iso1.exon1.amp1_616	-0.726109408	-0.738808214	0.079908805	-0.012698806	0.72475879	0.999885054	FALSE
534	PF3D7_0508900.iso1.exon1.amp1_1678	-0.881268951	-0.871416716	0.079901606	0.009852235	0.724782497	0.999885054	FALSE
1324	PF3D7_0935900.e2s1_9232	0.598221488	0.626459918	0.079527999	0.02823843	0.726013348	0.999885054	FALSE
480	PF3D7_0426000.iso1.exon1.amp1_4198	-0.321862824	-0.307320067	0.07942017	0.014542756	0.726368736	0.999885054	FALSE
1698	PF3D7_1129000.e1s1_6583	-0.443698057	-0.453308217	0.079398277	-0.009610159	0.7264409	0.999885054	FALSE
1099	PF3D7_0823300.e1s1_7488	-0.466365534	-0.424797786	0.079380154	0.041567749	0.726500636	0.999885054	FALSE
1194	PF3D7_0905300.s5_9157	-0.463718162	-0.427988971	0.079336239	0.035729191	0.726645403	0.999885054	FALSE
502	PF3D7_0502700.iso1.exon2.amp1_3857	0.042232233	0.012122807	0.079214518	-0.030109425	0.727046706	0.999885054	FALSE
204	PF3D7_0223300 (renamed)_6619	0.713072989	0.748469581	0.079110887	0.035396592	0.727388433	0.999885054	FALSE
1909	PF3D7_1223700.1o2_5258	0.284174617	0.271674719	0.079086644	-0.012499898	0.727468382	0.999885054	FALSE
2300	PF3D7_1349500.e1s4_5127	-0.949074945	-0.968702804	0.079081693	-0.01962786	0.727484709	0.999885054	FALSE
2529	PF3D7_1429500.1o1_8809	-0.600096151	-0.585688891	0.079075496	0.01440726	0.72750515	0.999885054	FALSE
1657	PF3D7_1122500.iso1.exon1.amp2_4229	-0.515170314	-0.494781373	0.078916085	0.020388941	0.728030955	0.999885054	FALSE
374	PF3D7_0405300.iso1.exon1.amp2_3940	0.006528245	0.027394024	0.078804746	0.020865779	0.728398283	0.999885054	FALSE
345	PF3D7_0400300.iso1.exon1.amp1_2731	-0.116986647	-0.136114095	0.078742023	-0.019127449	0.728605247	0.999885054	FALSE
1613	PF3D7_1112100.iso1.exon1.amp2_1686	-0.472771169	-0.486071151	0.078694703	-0.013299982	0.7287614	0.999885054	FALSE
2041	PF3D7_1252400.e4s3_5776	-0.148155116	-0.12403046	0.078653837	0.024124655	0.728896266	0.999885054	FALSE
1606	PF3D7_1111300.1o1_8154	-0.122425437	-0.141496909	0.078616444	-0.019071471	0.729019679	0.999885054	FALSE
2548	PF3D7_1433800.iso1.exon1.amp2_529	-0.295621891	-0.315145008	0.07855327	-0.019523117	0.729228197	0.999885054	FALSE
1901	PF3D7_1222300.e1s1_9154	-0.830361476	-0.866590237	0.078359667	-0.036228761	0.729867353	0.999885054	FALSE
1528	PF3D7_1037000.iso1.exon3.amp2_4564	-0.309443501	-0.262490803	0.078358509	0.046952698	0.729871173	0.999885054	FALSE
1555	PF3D7_1041300.iso1.exon2.amp2_787	-0.79560341	-0.83340927	0.078111226	-0.03780586	0.730687845	0.999885054	FALSE
274	PF3D7_0311400.iso1.exon1.amp1_2120	-0.158510563	-0.194417223	0.078068452	-0.03590666	0.730829141	0.999885054	FALSE
2415	PF3D7_1403400.iso1.exon2.amp1_1221	0.253331494	0.222308423	0.078053427	-0.031023071	0.730878777	0.999885054	FALSE
2326	PF3D7_1355500.1o1_6760	0.710948368	0.687949856	0.07794063	-0.022998512	0.731251441	0.999885054	FALSE
1221	PF3D7_0909900.iso1.exon1.amp2_2197	-0.402003227	-0.348346723	0.077900921	0.053656503	0.731382652	0.999885054	FALSE
2646	PF3D7_1448800.iso1.exon2.amp1_950	-0.785843374	-0.730571352	0.077599806	0.055272022	0.732377893	0.999885054	FALSE
1492	PF3D7_1030400.2o2_6704	-0.663071574	-0.675844476	0.077452438	-0.012772902	0.732865147	0.999885054	FALSE
2594	PF3D7_1440300.4o6_7303	-0.102891047	-0.088443599	0.077370811	0.014447448	0.733135088	0.999885054	FALSE
2266	PF3D7_1343100.1o1_5543	0.137950414	0.120832919	0.077178026	-0.017117495	0.733772769	0.999885054	FALSE
653	PF3D7_0600400.iso1.exon1.amp1_3033	1.271659503	1.295110137	0.077130819	0.023450634	0.733928946	0.999885054	FALSE
804	PF3D7_0700400.iso1.exon3.amp1_4165	0.692060081	0.71741859	0.077070876	0.025358508	0.734127278	0.999885054	FALSE
141	PF3D7_0208000.4o4_7083	-0.468450039	-0.454608171	0.076898129	0.013841868	0.734698948	0.999885054	FALSE
2475	PF3D7_1415100.iso1.exon1.amp1_4203	-0.235911658	-0.252916051	0.076820371	-0.017004394	0.734956321	0.999885054	FALSE
946	PF3D7_0726500.iso1.exon4.amp2_2525	-0.399855636	-0.415412169	0.076812876	-0.015556533	0.734981133	0.999885054	FALSE
1536	PF3D7_1038500.2o2_4992	-0.228049817	-0.200109738	0.076733026	0.027940079	0.735245466	0.999885054	FALSE
1829	PF3D7_1205800.3o4_5646	-0.78207364	-0.794065677	0.07662405	-0.011992037	0.735606278	0.999885054	FALSE
2170	PF3D7_1321300.e1s1_7716	-0.016661866	0.040842181	0.076600445	0.057504047	0.735684442	0.999885054	FALSE
1865	PF3D7_1212800_6558	-0.304085093	-0.288184534	0.076232972	0.015900559	0.736901621	0.999885054	FALSE
1470	PF3D7_1022300.2o6_4974	-0.432053067	-0.444782976	0.076185119	-0.01272991	0.737060178	0.999885054	FALSE
2230	PF3D7_1332800.1o1_7267	-0.606378622	-0.598282185	0.076110967	0.008096437	0.737305896	0.999885054	FALSE
87	PF3D7_0200400.iso1.exon1.amp1_1275	0.585564325	0.551482795	0.075905808	-0.034081531	0.737985885	0.999885054	FALSE
2296	PF3D7_1348800.2o4_7958	0.268748297	0.334786072	0.075886318	0.066037775	0.738050496	0.999885054	FALSE
854	PF3D7_0709900.e2_7429	-0.411068773	-0.376437719	0.075747736	0.034631054	0.73850996	0.999885054	FALSE
681	PF3D7_0606100.iso1.exon4.amp1_4473	-0.177944622	-0.146479754	0.075498388	0.031464868	0.739336917	0.999885054	FALSE
1682	PF3D7_1126000.e1s2_8344	-0.269098514	-0.285057127	0.075491289	-0.015958613	0.739360465	0.999885054	FALSE
60	PF3D7_0111000.e5s1_5681	-0.493980128	-0.485116005	0.075328365	0.008864123	0.739900983	0.999885054	FALSE
900	PF3D7_0718100.iso1.exon1.amp2_1370	-0.224936669	-0.240047645	0.075312749	-0.015110976	0.739952798	0.999885054	FALSE
1520	PF3D7_1036400.1o2_6117	0.937522536	0.973681741	0.075311012	0.036159206	0.739958562	0.999885054	FALSE
2535	PF3D7_1430700.3o3_9063	-0.655259464	-0.640981107	0.075304175	0.014278357	0.739981248	0.999885054	FALSE
2138	PF3D7_1314000.iso1.exon1.amp1_1986	-0.559083492	-0.542685214	0.075240713	0.016398278	0.740191836	0.999885054	FALSE
1600	PF3D7_1110200.e1s1_4895	0.219416705	0.283814979	0.075041681	0.064398275	0.740852422	0.999885054	FALSE
1252	PF3D7_0917900.e2_8279	-0.132764857	-0.092254245	0.074983108	0.040510611	0.741046867	0.999885054	FALSE
529	PF3D7_0507900.iso1.exon2.amp1_43	-0.487021301	-0.498670169	0.074873452	-0.011648868	0.741410937	0.999885054	FALSE
777	PF3D7_0629300.1o1_7935	-0.202235122	-0.164219664	0.07484361	0.038015458	0.741510029	0.999885054	FALSE
1818	PF3D7_1202300.e31s1_7502	-0.159212415	-0.131336305	0.074647338	0.02787611	0.742161859	0.999885054	FALSE
2269	PF3D7_1343400.iso1.exon3.amp2_2487	0.137177801	0.179973723	0.074551322	0.042795922	0.742480808	0.999885054	FALSE
644	PF3D7_0532100_6557	1.872997625	1.852196019	0.074495349	-0.020801606	0.742666763	0.999885054	FALSE
2284	PF3D7_1346900.1o1_6406	0.311836837	0.338667795	0.074485922	0.026830958	0.742698082	0.999885054	FALSE
1004	PF3D7_0802000.e1s2_6642	-0.657928684	-0.629270526	0.074367443	0.028658157	0.743091755	0.999885054	FALSE
1	MAL13P1.303e4s1_6254	-0.662648925	-0.67390287	0.074263808	-0.011253945	0.743436166	0.999885054	FALSE
2142	PF3D7_1314500.iso1.exon2.amp1_2631	0.529641741	0.56022113	0.074187233	0.030579389	0.743690681	0.999885054	FALSE
2801	PF3D7_1479800.iso1.exon2.amp1_4468	1.615047791	1.649479799	0.074093383	0.034432008	0.744002659	0.999885054	FALSE
2333	PF3D7_1356800.e1s2_8297	-0.614596294	-0.62672362	0.074091578	-0.012127325	0.744008657	0.999885054	FALSE
885	PF3D7_0715300.1o3_4714	-0.353638551	-0.342837896	0.074083805	0.010800655	0.744034499	0.999885054	FALSE
1775	PF3D7_1144600.iso1.exon1.amp1_3019	-0.701527371	-0.691267247	0.074047579	0.010260124	0.744154935	0.999885054	FALSE
2422	PF3D7_1405300.iso1.exon1.amp1_seg1_558	-0.63409957	-0.69186795	0.074035849	-0.05776838	0.744193935	0.999885054	FALSE
1200	PF3D7_0905900.iso1.exon1.amp2_seg1_1439	-0.200527658	-0.211740083	0.073966288	-0.011212426	0.74442522	0.999885054	FALSE
715	PF3D7_0616800.iso1.exon1.amp1_2475	-0.227062208	-0.209483515	0.073948733	0.017578694	0.744483593	0.999885054	FALSE
1145	PF3D7_0831700.2o2_5026	-0.372845572	-0.30083086	0.073889411	0.072014712	0.744680859	0.999885054	FALSE
2303	PF3D7_1350800.iso1.exon1.amp1_4443	-0.451125372	-0.407657198	0.073885077	0.043468174	0.74469527	0.999885054	FALSE
559	PF3D7_0512600.e6s1_7173	-0.373494414	-0.391534953	0.073671983	-0.018040539	0.745404033	0.999885054	FALSE
2000	PF3D7_1243200.iso1.exon1.amp1_4415	-0.712312583	-0.698935161	0.073546454	0.013377422	0.745821659	0.999885054	FALSE
2351	PF3D7_1359900.iso1.exon1.amp1_242	-0.357133709	-0.367280299	0.073315443	-0.01014659	0.746590431	0.999885054	FALSE
254	PF3D7_0308000.1o1_8767	0.077000122	0.119880382	0.072970049	0.04288026	0.747740355	0.999885054	FALSE
1759	PF3D7_1140000.2o2_8125	-0.418885667	-0.44596817	0.072935838	-0.027082503	0.747854285	0.999885054	FALSE
219	PF3D7_0301400.2o2_4671	-0.601450865	-0.618517427	0.072820937	-0.017066562	0.748236984	0.999885054	FALSE
667	PF3D7_0602700.iso1.exon1.amp1_1591	-0.333590554	-0.282516893	0.072806067	0.051073661	0.748286516	0.999885054	FALSE
62	PF3D7_0111500.e4s1_8619	0.697590772	0.679830813	0.0728035	-0.01775996	0.748295067	0.999885054	FALSE
784	PF3D7_0630600.2o2_8237	0.756928849	0.773582207	0.072656539	0.016653359	0.748784654	0.999885054	FALSE
2769	PF3D7_1473600.1o1_6389	-0.933888457	-0.89552831	0.072596185	0.038360147	0.74898575	0.999885054	FALSE
2664	PF3D7_1453200.iso1.exon11.amp1_2421	-0.330934749	-0.31438409	0.072377591	0.016550659	0.749714246	0.999885054	FALSE
1611	PF3D7_1111900.iso1.exon1.amp1_693	0.228143682	0.241877522	0.072321754	0.013733839	0.749900369	0.999885054	FALSE
611	PF3D7_0524100.iso1.exon1.amp2_798	-0.567969192	-0.53668945	0.072240752	0.031279742	0.750170404	0.999885054	FALSE
1141	PF3D7_0831300.2o2_7356	-0.352960301	-0.388993313	0.072123262	-0.036033012	0.750562137	0.999885054	FALSE
[truncated: 806 more rows]
