# Supplementary material for: Proteome-wide analysis of a malaria vaccine study reveals personalized humoral immune profiles in Tanzanian adults
Source: eLife. 2020 Jul 14;9:e53080. doi: 10.7554/eLife.53080 (PMC7386907; doi:10.7554/eLife.53080)
Supplement: Figure 5—figure supplement 2—source data 1. [file elife-53080-fig5-figsupp2-data1.csv]

	protein_ID	mean_seorpositivy_group1	mean_seorpositivy_group2	log_FC	p_value	sd1	sd2	size_eff	adj.p_value	is_threshold_reached
1	MAL13P1.303e4s1_6254	-0.0480773055258511	0.0397414678124658	0.087818773338317	0.387094226885235	0.233693087128087	0.189954804619173	0.063846167778932	0.999805500558022	FALSE
2	MAL8P1.143_14o15_5934	-0.0575440510920593	0.0957005780872066	0.153244629179266	0.743992248821384	0.335667018458964	0.972684221891618	0.0563720491876903	0.999805500558022	FALSE
3	MAL8P1.143_3o15_6506	-0.12697449866383	-0.0658301232930214	0.0611443753708083	0.381881132292681	0.301082606340609	0.097888162828268	0.0356652683203003	0.999805500558022	FALSE
4	PF3D7_0100100.iso1.exon2.amp1_1871	-0.12147510206094	-0.0628640182079973	0.058611083852943	0.837400492582911	0.41587636749011	0.581765676834452	0.0223317899023042	0.999805500558022	FALSE
5	PF3D7_0100200.iso1.exon1.amp1_706	-0.13568767852006	0.0277703307146435	0.163458009234704	0.342986087631934	0.524526029826597	0.300722764600967	0.0539909014136986	0.999805500558022	FALSE
6	PF3D7_0100300.iso1.exon1.amp1_1010	-0.0771961902897278	-0.0920137746787578	-0.01481758438903	0.960987331415232	0.226954349828965	0.631938389811174	-0.00822482390775818	0.999805500558022	FALSE
7	PF3D7_0100300.iso1.exon2.amp1_1317	-0.0765501786879225	0.165476914538491	0.242027093226414	0.100719858061837	0.193460440287854	0.254976201707065	0.200460072289028	0.999805500558022	FALSE
8	PF3D7_0100400.iso1.exon2.amp1_991	-0.103577096409882	0.106394737767193	0.209971834177075	0.282274565765752	0.468437526894438	0.355513708788632	0.0765310059473909	0.999805500558022	FALSE
9	PF3D7_0100600.iso1.exon1.amp1_2163	-0.0756901524046289	0.189904115910729	0.265594268315358	0.691515558208694	0.591298439474051	1.37792737264893	0.0612824340425608	0.999805500558022	FALSE
10	PF3D7_0100800.iso1.exon2.amp1_133	-0.147963520706527	-0.00441876333689351	0.143544757369634	0.556432623490232	0.340866871440185	0.488889262635037	0.0663951826081902	0.999805500558022	FALSE
11	PF3D7_0100900.iso1.exon1.amp1_2446	-0.159726473416872	0.0987845786474875	0.258511052064359	0.170988139708619	0.592056466816189	0.313520100044289	0.0758682179447707	0.999805500558022	FALSE
12	PF3D7_0101000.iso1.exon1.amp1_2157	-0.0599377111482619	0.0303201979673204	0.0902579091155823	0.318258162662336	0.287145359997043	0.154835080465127	0.054582860300432	0.999805500558022	FALSE
13	PF3D7_0101100.iso1.exon1.amp1_3004	-0.0177394476332637	0.10678488728954	0.124524334922804	0.693449195743254	0.277756962292503	0.650490309336718	0.0610434211310828	0.999805500558022	FALSE
14	PF3D7_0101300.iso1.exon2.amp1_4146	-0.116865925584241	0.11630175251806	0.233167678102301	0.354470912229376	0.651300612643617	0.459033928437745	0.0614088232343295	0.999805500558022	FALSE
15	PF3D7_0101600.iso1.exon1.amp1_3887	0.0762623639913945	0.0151809345410822	-0.0610814294503124	0.912445900544054	0.358306514020474	1.16033646792141	-0.0198239059016095	0.999805500558022	FALSE
16	PF3D7_0101800.iso1.exon1.amp1_2719	-0.0993663278873688	0.171674304135859	0.271040632023228	0.441285216080636	0.363428870928122	0.701448342039208	0.10889912338712	0.999805500558022	FALSE
17	PF3D7_0101900.iso1.exon1.amp1_123	-0.105303943359859	0.045605597415469	0.150909540775328	0.364814057401308	0.407464290400543	0.307296430723991	0.0632612734915833	0.999805500558022	FALSE
18	PF3D7_0102200.e1s1_8021	0.00411076531552842	-0.139862846704321	-0.143973612019849	0.699167530421028	0.18158757975162	0.772704121943425	-0.0775864030190483	0.999805500558022	FALSE
19	PF3D7_0102200.e2s1_7477	-0.0235725962365839	0.147902310084692	0.171474906321276	0.882736154583109	0.391268645856121	2.43624172242501	0.032041584013716	0.999805500558022	FALSE
20	PF3D7_0102200.e2s2_7188	0.000236625599784061	0.393246910808071	0.393010285208287	0.689480440041079	0.260292837627431	2.04287229115552	0.0904934474743025	0.999805500558022	FALSE
21	PF3D7_0102500.e1s2_8945	-0.0477490806305721	0.0378932364289646	0.0856423170595367	0.914201273296033	0.241104197812494	1.66743023409636	0.0237698298472346	0.999805500558022	FALSE
22	PF3D7_0102600.2o3_6170	-0.0367015949989951	-0.0502572432470046	-0.0135556482480095	0.896505692994693	0.231421749678109	0.203860671714149	-0.00988639492947637	0.999805500558022	FALSE
23	PF3D7_0102700.2o2_7571	-0.112727942127563	-0.0189894357378794	0.0937385063896839	0.316901154924478	0.485588435919924	0.0830159892256074	0.0340629945529135	0.999805500558022	FALSE
24	PF3D7_0103400.e1s1_5925	0.0389883677034341	0.129262613692271	0.0902742459888366	0.864469593707287	0.442699575435031	1.09930311749398	0.0270893309926864	0.999805500558022	FALSE
25	PF3D7_0103500.2o7_7085	-0.0319991923122775	0.13215941455942	0.164158606871698	0.826771475426732	0.235442840578367	1.56944613386103	0.0481436429388611	0.999805500558022	FALSE
26	PF3D7_0103800.e4s1_7155	-0.0919677614018887	0.00547665259586658	0.0974444139977553	0.666623128141685	0.381891942281109	0.452083622717378	0.0416093188109223	0.999805500558022	FALSE
27	PF3D7_0103900.1o1_9076	0.0652082730620976	0.0688366169472541	0.00362834388515647	0.996359262005895	0.440672640422191	1.66464258626311	0.000872382172747205	0.999805500558022	FALSE
28	PF3D7_0104000.3o3_6106	-0.0675695761967423	0.0279186922923913	0.0954882684891336	0.656523274028566	0.210316134221308	0.439824077117364	0.0645362956442115	0.999805500558022	FALSE
29	PF3D7_0104100.1o2_5053	-0.0374676161616486	0.0200380954676088	0.0575057116292574	0.514828685564262	0.330740773678177	0.142039444109281	0.0303877753136966	0.999805500558022	FALSE
30	PF3D7_0104100.2o2_5342	0.107302192235467	0.112544576951609	0.00524238471614227	0.993936275931491	0.520415625992032	1.43907756672803	0.00127332341980794	0.999805500558022	FALSE
31	PF3D7_0104600.e1s1_7213	0.0064894331138198	0.0790803464062527	0.0725909132924329	0.919868727044116	0.224969551990447	1.51371111495551	0.022104223723989	0.999805500558022	FALSE
32	PF3D7_0105600.e2_4833	-0.0106767383847875	0.058130783254752	0.0688075216395394	0.817628622584868	0.190038287879255	0.621611049545008	0.0418651039329531	0.999805500558022	FALSE
33	PF3D7_0105700.iso1.exon1.amp2_233	-0.00783874916531709	0.204652595555012	0.212491344720329	0.761085627897323	0.332518471119642	1.45533624438135	0.0613148953109547	0.999805500558022	FALSE
34	PF3D7_0105700.iso1.exon1.amp3_522	-0.0650623991274797	0.144061705015863	0.209124104143343	0.647752916885554	0.248986050584878	0.944768442570046	0.0887349943072916	0.999805500558022	FALSE
35	PF3D7_0105900.iso1.exon1.amp1_short_2005	-0.0120542698210697	0.128471197406768	0.140525467227838	0.325199704140127	0.190879140136833	0.275592399652628	0.11591450139009	0.999805500558022	FALSE
36	PF3D7_0106200.iso1.exon1.amp1_3577	-0.0740831627289611	0.0674321251844567	0.141515287913418	0.426651967752162	0.227890789672876	0.351522881289476	0.0963744800805764	0.999805500558022	FALSE
37	PF3D7_0106500.iso1.exon1.amp1_2562	-0.102285725335945	0.0443134959761743	0.146599221312119	0.656243893542938	0.271408895944111	0.677057860875407	0.0716112400601265	0.999805500558022	FALSE
38	PF3D7_0107900.iso1.exon1.amp1_696	-0.00387227728981446	0.272020220326931	0.275892497616745	0.182895531465694	0.433767950764209	0.371294315299189	0.107616373601357	0.999805500558022	FALSE
39	PF3D7_0108000.e1s1_7463	-0.0784152989246044	0.117807115244061	0.196222414168665	0.0327243355809423	0.339298469654313	0.130698603288298	0.101298043243451	0.999805500558022	FALSE
40	PF3D7_0108300.s1_7972	-0.201066871925656	0.0395335821558437	0.240600454081499	0.175541161602432	0.75157887597938	0.245771159889911	0.0562164715606856	0.999805500558022	FALSE
41	PF3D7_0108300.s2_7111	-0.117458989352599	-0.101899853084257	0.015559136268342	0.982262400724645	0.67315093149597	1.45302540656221	0.00324816466194207	0.999805500558022	FALSE
42	PF3D7_0108300.s3_7689	-0.157786303838213	0.127645873077232	0.285432176915445	0.168941209085453	0.690456138078999	0.337013501349787	0.0720144266930375	0.999805500558022	FALSE
43	PF3D7_0108400.iso1.exon1.amp1_short_3733	-0.0707537512345282	0.0188105796171048	0.0895643308516329	0.404361166220361	0.30471022029884	0.193061047433911	0.050703896106313	0.999805500558022	FALSE
44	PF3D7_0108400.iso1.exon7.amp1_45	-0.0884507621064602	0.0173946109943483	0.105845373100808	0.837020449577628	0.166410390411553	1.07689939299655	0.0450303661218347	0.999805500558022	FALSE
45	PF3D7_0108600.iso1.exon4.amp1_4380	-0.0619309235092879	0.0651818600405218	0.12711278354981	0.297306537217342	0.30920336207832	0.220724178576463	0.0704629777237961	0.999805500558022	FALSE
46	PF3D7_0108600.iso1.exon5.amp1_634	-0.0188813576205977	-0.0825581644865483	-0.0636768068659506	0.265133371204105	0.0985343146436675	0.107072340279701	-0.10664077910347	0.999805500558022	FALSE
47	PF3D7_0108700.e1s1_7776	-0.0805120345889262	0.0422448834052613	0.122756917994187	0.315791867269403	0.546036792501565	0.162062741934834	0.0395249298857642	0.999805500558022	FALSE
48	PF3D7_0108800.iso1.exon6.amp1_1233	-0.0978223269124113	0.106400340539825	0.204222667452236	0.0571573133836119	0.242112193425493	0.174682258030931	0.144485217586727	0.999805500558022	FALSE
49	PF3D7_0109200.iso1.exon1.amp1_2413	-0.03883700020472	0.23541593539949	0.27425293560421	0.23679430269331	0.200590590251848	0.438792200537222	0.191186669436358	0.999805500558022	FALSE
50	PF3D7_0109800.1o1_7336	-0.0266133298574539	0.136304427027812	0.162917756885266	0.808176324975442	0.214110114085861	1.40289517644108	0.0533099166351322	0.999805500558022	FALSE
51	PF3D7_0109900.iso2.exon16.amp1_324	-0.0964080078864215	-0.0354542689007179	0.0609537389857036	0.535720944589087	0.324276212719306	0.17022280640092	0.032670572751172	0.999805500558022	FALSE
52	PF3D7_0110000.1o1_8428	-0.0344074321637234	0.256424371071334	0.290831803235057	0.567355791967304	0.324458337574865	1.03967462588306	0.104860022555493	0.999805500558022	FALSE
53	PF3D7_0110500.e1s2_5766	0.01570579064351	0.0697966551814808	0.0540908645379708	0.688608377527974	0.387646946100954	0.247804998569513	0.0240599390182696	0.999805500558022	FALSE
54	PF3D7_0110500.e1s3_5188	-0.0200350059493506	-0.0213128461088946	-0.00127784015954403	0.996588569953347	0.355932629155188	0.616391603459633	-0.00054125503397549	0.999805500558022	FALSE
55	PF3D7_0110600.e1s1_6533	-0.154553987816537	0.0345788839595073	0.189132871776044	0.487961781517721	0.622222246494829	0.518088581437466	0.0515465165783634	0.999805500558022	FALSE
56	PF3D7_0110600.e3_5665	0.0220521850095601	-0.0485545491123084	-0.0706067341218685	0.746831848319173	0.195147042410379	0.451772000177738	-0.049494960073667	0.999805500558022	FALSE
57	PF3D7_0110700.e1s1_7186	-0.064314031695492	0.0199877189638215	0.0843017506593135	0.738607555507047	0.184391129303057	0.523349263558033	0.0570495175259631	0.999805500558022	FALSE
58	PF3D7_0110800.iso1.exon3.amp1_2717	-0.0216770805235639	0.00342657044224488	0.0251036509658087	0.917792533191353	0.238220214035772	0.504408727278149	0.0149128878918234	0.999805500558022	FALSE
59	PF3D7_0111000.e1s2_6049	-0.0330788063215478	0.212958888905889	0.246037695227437	0.714888548563034	0.4487173001608	1.39478485900173	0.0652346612216866	0.999805500558022	FALSE
60	PF3D7_0111000.e5s1_5681	-0.0324917131752673	0.00345127811112995	0.0359429912863973	0.424279360923853	0.223046689982969	0.0481231235152333	0.0284042674098578	0.999805500558022	FALSE
61	PF3D7_0111300.iso1.exon1.amp1_1701	-0.0892836957099391	0.110804988019621	0.20008868372956	0.150955923228788	0.273558902103678	0.247112521434048	0.12317029963277	0.999805500558022	FALSE
62	PF3D7_0111500.e4s1_8619	-0.105018941717331	-0.0348651929030655	0.0701537488142651	0.703118572211298	0.374497712509385	0.361927449739066	0.0313363823641852	0.999805500558022	FALSE
63	PF3D7_0111500.e5s1_5099	-0.0446695780964659	-0.100404131865853	-0.0557345537693867	0.428862715372112	0.327736792739883	0.0879484956903996	-0.0299280504275771	0.999805500558022	FALSE
64	PF3D7_0111700.iso1.exon1.amp1_961	-0.0478128170414495	-0.00593608716737499	0.0418767298740745	0.765607801078631	0.198187814596092	0.285807559376347	0.0332768916180396	0.999805500558022	FALSE
65	PF3D7_0112000.3o4_5862	-0.0322695874208832	0.114399412357008	0.146668999777892	0.547417914645213	0.362167276348992	0.486219519698028	0.0646745416883774	0.999805500558022	FALSE
66	PF3D7_0112100.1o1_6684	0.0183916440575565	0.0895188434454535	0.071127199387897	0.643186849177358	0.486225227642501	0.271895672283371	0.0253686372560669	0.999805500558022	FALSE
67	PF3D7_0112200.iso1.exon1.amp2_183	-0.114745468286741	0.0502770682618664	0.165022536548608	0.692038376264432	0.363664868628747	0.857920383663606	0.0616022620306608	0.999805500558022	FALSE
68	PF3D7_0113100.iso1.exon1.amp1_4475	-0.0277556857770731	0.157476618620703	0.185232304397776	0.781167801984645	0.209909644086502	1.39227798149037	0.0611899928911308	0.999805500558022	FALSE
69	PF3D7_0113100.iso1.exon2.amp1_4270	-0.061180963428473	0.239684219035178	0.300865182463651	0.375592139471209	0.302724547118118	0.669999293044349	0.13836509196166	0.999805500558022	FALSE
70	PF3D7_0113100.iso1.exon2.amp2_3349	-0.042914762559324	0.192530675543194	0.235445438102518	0.65031548990719	0.241086466148674	1.07334790042925	0.0925758258067722	0.999805500558022	FALSE
71	PF3D7_0113300.2o2_5313	-0.0602383859277824	0.233730211453715	0.293968597381498	0.347094002705472	0.331434191986606	0.610737897904588	0.131372736306775	0.999805500558022	FALSE
72	PF3D7_0113400.2o2_8752	0.0282652015390037	0.304452865628587	0.276187664089583	0.770914159101826	0.357215361398247	1.97841079429599	0.0621632488904983	0.999805500558022	FALSE
73	PF3D7_0113800.2o4_7664	-0.00471900880069014	0.0573137450589442	0.0620327538596344	0.727205116631096	0.405577467340307	0.34440782598758	0.0258959289191429	0.999805500558022	FALSE
74	PF3D7_0113800.3o4_7092	-0.0122984248561746	0.110775999043873	0.123074423900048	0.336770859968113	0.439744598115366	0.212876205882307	0.0487666371351069	0.999805500558022	FALSE
75	PF3D7_0113900.2o2_5532	-0.0330005736026329	0.0608909283336544	0.0938915019362873	0.905112171139911	0.273301896130117	1.6513148332986	0.0257478025775554	0.999805500558022	FALSE
76	PF3D7_0114000.e2s2_8371	-0.00185235071163741	0.0321911431554671	0.0340434938671045	0.834561330543951	0.307700243268209	0.325148489723562	0.0183214236205028	0.999805500558022	FALSE
77	PF3D7_0114100.iso1.exon1.amp1_2718	-0.0919197535993915	0.07852808618509	0.170447839784481	0.683012294277521	0.554727283386906	0.847699400548127	0.0477883974453499	0.999805500558022	FALSE
78	PF3D7_0115000.e1s1_6895	-0.00256013454691468	0.0683779180663208	0.0709380526132355	0.68946129262202	0.240684954182336	0.3603577355912	0.0460484630292247	0.999805500558022	FALSE
79	PF3D7_0115200.iso1.exon2.amp1_719	-0.100241029355335	0.044685148754235	0.14492617810957	0.560029074561069	0.302454457360471	0.501340063878896	0.0730806185358276	0.999805500558022	FALSE
80	PF3D7_0115300.iso1.exon2.amp1_1279	-0.074457388021425	0.217954119073882	0.292411507095307	0.0100816518158604	0.240663912140609	0.16220122614765	0.208937396923019	0.999805500558022	FALSE
81	PF3D7_0115400.iso1.exon2.amp1_2714	-0.185452631142363	0.192034138876117	0.37748677001848	0.428924013482729	0.73206640764205	0.934622485258449	0.0830824855648745	0.999805500558022	FALSE
82	PF3D7_0115700.iso1.exon1.amp1_1583	-0.225841135462496	0.0590422401206904	0.284883375583186	0.480132298862596	0.637234072350666	0.794987235256594	0.0723087529446489	0.999805500558022	FALSE
83	PF3D7_0115700.iso1.exon2.amp2_4262	-0.0835030344771103	0.0646640605483931	0.148167095025503	0.400329609061717	0.294994028090634	0.341434983029576	0.0821756924081749	0.999805500558022	FALSE
84	PF3D7_0200100 (renamed)_4770	-0.0600601387771986	0.00290180821870862	0.0629619469959072	0.869101894643365	0.40246387852905	0.789876254976082	0.022721081297973	0.999805500558022	FALSE
85	PF3D7_0200100.iso1.exon2.amp1_2746	-0.138700493036021	0.0998254044813663	0.238525897517387	0.372759522074688	0.262456435660307	0.526778038146118	0.131021630242731	0.999805500558022	FALSE
86	PF3D7_0200200.iso1.exon1.amp1_1284	-0.156776218568912	0.201850140761984	0.358626359330896	0.254256410207278	0.453223413571689	0.592636026270923	0.12696797528012	0.999805500558022	FALSE
87	PF3D7_0200400.iso1.exon1.amp1_1275	-0.224378573388944	0.130634139699359	0.355012713088304	0.443861539430351	0.682105019355177	0.912410252329006	0.08317395124695	0.999805500558022	FALSE
88	PF3D7_0200500.iso1.exon1.amp1_3303	-0.148987633549108	0.0787329975453751	0.227720631094484	0.0363997839997045	0.540733684998074	0.10160079376681	0.0742827194553505	0.999805500558022	FALSE
89	PF3D7_0200600.iso1.exon1.amp1_2442	-0.148678204372892	0.237626103723698	0.38630430809659	0.360962676285396	0.64397155033046	0.817937615443174	0.0967380456464379	0.999805500558022	FALSE
90	PF3D7_0200700.iso1.exon1.amp1_700	-0.110794432403222	-0.0394534728321815	0.0713409595710403	0.755935395154369	0.372300081362522	0.462627006331453	0.03101332331441	0.999805500558022	FALSE
91	PF3D7_0200800.iso1.exon3.amp1_406	-0.136512680439586	0.0466592059787672	0.183171886418353	0.0817066240824462	0.399371885198823	0.154057504639919	0.0803349325422291	0.999805500558022	FALSE
92	PF3D7_0201000.iso1.exon1.amp1_3595	-0.0810377567132517	0.0194603538362099	0.100498110549462	0.587355040878758	0.265821210625105	0.371629609488377	0.0599139546553978	0.999805500558022	FALSE
93	PF3D7_0201200.iso1.exon2.amp1_3603	-0.105411155342346	0.193770204782821	0.299181360125167	0.534585708913337	0.579390181443559	0.968766173581135	0.0785791525501057	0.999805500558022	FALSE
94	PF3D7_0201300.iso1.exon2.amp1_119	-0.17247080407326	0.155064639175145	0.327535443248404	0.569311562003748	0.642612459292017	1.1649884598144	0.0758573860440783	0.999805500558022	FALSE
95	PF3D7_0201500.2o2_5533	-0.0358373901548988	-0.168505857804829	-0.13266846764993	0.783199497058162	0.281046530882134	1.0037714486666	-0.0518069534804375	0.999805500558022	FALSE
96	PF3D7_0201700.2o2_8813	-0.0946638587685314	0.0561203917993627	0.150784250567894	0.123180382882921	0.242175622898831	0.167140034063314	0.106928100521762	0.999805500558022	FALSE
97	PF3D7_0201800.iso1.exon1.amp1_4451	-0.00637471120356577	0.316164217432634	0.322538928636199	0.644177348285326	0.170324886093843	1.44518698947824	0.105863762133734	0.999805500558022	FALSE
98	PF3D7_0201800.iso1.exon2.amp1_3566	-0.0316537644771116	0.120897410557109	0.152551175034221	0.376216624760076	0.186296316348271	0.338866884707423	0.121751991531222	0.999805500558022	FALSE
99	PF3D7_0201900.e2s1_5490	0.0110501466404364	0.0102593497985932	-0.00079079684184317	0.992931580003032	0.168823939651562	0.178477400141346	-0.000775639461761934	0.999805500558022	FALSE
100	PF3D7_0202000.e2s1_8364	-0.118291294488521	-0.106398459318269	0.0118928351702517	0.967376822758168	0.387315512925883	0.596721765619301	0.00476677909879942	0.999805500558022	FALSE
101	PF3D7_0202300.2o2_8437	0.00754151257504995	0.0475821853444536	0.0400406727694037	0.929227495589016	0.471736911802099	0.933421295625194	0.0122947741905375	0.999805500558022	FALSE
102	PF3D7_0202400.e1s1_5756	-0.0141639381394305	-0.0370334896406412	-0.0228695515012107	0.685756604347141	0.136808466926054	0.108086482999945	-0.0284613513997838	0.999805500558022	FALSE
103	PF3D7_0202500.1o1_7250	0.0155706693164794	-0.0189130389478244	-0.0344837082643038	0.960879764102746	0.301988979683876	1.47390335126163	-0.0101213284700845	0.999805500558022	FALSE
104	PF3D7_0202600.iso2.exon1.amp1_2518	-0.0514722173814476	0.0138389012903041	0.0653111186717517	0.45918223117881	0.33800249705731	0.13910396585884	0.0338020396546521	0.999805500558022	FALSE
105	PF3D7_0202700.iso1.exon1.amp1_2186	-0.0678014797861626	0.108549690731229	0.176351170517391	0.209539421772703	0.267760558118302	0.256605373398029	0.110270144292482	0.999805500558022	FALSE
106	PF3D7_0203000.iso1.exon1.amp1_538	-0.0741084933130555	0.0149152910251235	0.089023784338179	0.444504519997343	0.241213255014552	0.222866079000973	0.062017382778834	0.999805500558022	FALSE
107	PF3D7_0203000.iso1.exon1.amp2_1055	-0.0185061581251478	0.358307757780379	0.376813915905527	0.664643570262402	0.202619304426766	1.80209834179292	0.0996319155606341	0.999805500558022	FALSE
108	PF3D7_0203100.e1s1_6609	-0.0683167514157968	0.00532838263629607	0.0736451340520929	0.614387728848935	0.239458349757731	0.291612718139678	0.0499356006497874	0.999805500558022	FALSE
109	PF3D7_0203100.e2s2_7084	-0.0229083042526246	0.0726727980606743	0.0955811023132988	0.815622104255277	0.200396790399683	0.855695843951075	0.0465615661010965	0.999805500558022	FALSE
110	PF3D7_0203100.e2s3_5060	-0.0556716899672299	-0.0991153726317883	-0.0434436826645584	0.806402634657847	0.353640434985295	0.351080558652271	-0.0204909352724309	0.999805500558022	FALSE
111	PF3D7_0203200.1o1_5016	-0.0385218479387946	-0.0976487766993852	-0.0591269287605906	0.772298886556062	0.249507285428458	0.418733523177567	-0.0360270593614362	0.999805500558022	FALSE
112	PF3D7_0203800.iso1.exon12.amp1_2119	-0.0298066427867264	-0.0421375112156028	-0.0123308684288764	0.925281625158707	0.291049704433345	0.257449593140035	-0.00714807255657632	0.999805500558022	FALSE
113	PF3D7_0204100.iso1.exon1.amp1_247	-0.0704058608128824	0.147638650063703	0.218044510876585	0.232578006528666	0.208188100958999	0.343680165301035	0.159903039051788	0.999805500558022	FALSE
114	PF3D7_0204100.iso1.exon1.amp2_536	-0.0659483837009631	0.0755662002445412	0.141514583945504	0.643153313962757	0.197008320468041	0.62928855772213	0.0841810635627105	0.999805500558022	FALSE
115	PF3D7_0204100.iso1.exon1.amp3_476	-0.00941607583931272	0.112262065381907	0.121678141221219	0.612268267871777	0.205478960708427	0.491238570781715	0.0799484831605235	0.999805500558022	FALSE
116	PF3D7_0204300.1o1_4751	0.0886334669295119	0.0933929308062812	0.00475946387676926	0.993249346200615	0.416220931707042	1.17389903638865	0.00143140434327708	0.999805500558022	FALSE
117	PF3D7_0204500.1o1_5582	-0.077523492638525	0.0677617768135473	0.145285269452072	0.0606208139135859	0.301592350441461	0.109848198000738	0.0844607463386297	0.999805500558022	FALSE
118	PF3D7_0204600.iso1.exon1.amp2_seg2_1153	-0.0325044859512772	0.34295616694492	0.375460652896197	0.526965975057129	0.178560988012194	1.21183369017907	0.142992922281053	0.999805500558022	FALSE
119	PF3D7_0204800.iso1.exon1.amp1_3895	-0.0821438583095938	0.239662772539186	0.32180663084878	0.261262767212493	0.185338857619177	0.54879612497741	0.21201220720372	0.999805500558022	FALSE
120	PF3D7_0206000.s2_8261	-0.0431442576022584	0.0898701317812833	0.133014389383542	0.50756996858302	0.205921393965635	0.404201909113002	0.0938110220093727	0.999805500558022	FALSE
121	PF3D7_0206100.1o4_7281	0.000859023766856123	-0.146485169564285	-0.147344193331141	0.81557495743114	0.473295848756758	1.31324480045943	-0.039285870650939	0.999805500558022	FALSE
122	PF3D7_0206200.1o1_7052	-0.0477009970883799	0.0981598268391085	0.145860823927488	0.099265266479271	0.40492875001888	0.107132938544859	0.0634005939699873	0.999805500558022	FALSE
123	PF3D7_0206800_8292	0.0202948367659676	0.131283877861667	0.1109890410957	0.638431247562184	0.241532647313677	0.482562616359218	0.0663489807126063	0.999805500558022	FALSE
124	PF3D7_0206900.1.1o2_4674	0.211655282550642	0.202367310141269	-0.00928797240937379	0.988107160486745	0.663587195002705	1.2900832138332	-0.00203905376250155	0.999805500558022	FALSE
125	PF3D7_0206900.1.2o2_5836	-0.0348195104807422	0.0311914154649305	0.0660109259456727	0.393446010756537	0.305130709493087	0.118448454684527	0.0378880888350807	0.999805500558022	FALSE
126	PF3D7_0206900.1.e1_8561	0.101940077445565	0.321113696580995	0.21917361913543	0.688354243680511	0.495527562656272	1.12406596621045	0.0609955179120742	0.999805500558022	FALSE
127	PF3D7_0207000.1o2_6703	0.0911719259460979	0.333574933648662	0.242403007702564	0.673221473951757	0.467414785871119	1.18344715468274	0.0683070968564039	0.999805500558022	FALSE
128	PF3D7_0207000.2o2_6414	-0.00820861087741619	0.134231946348606	0.142440557226022	0.861260711582898	0.341254520717337	1.70558237413579	0.0363413780842878	0.999805500558022	FALSE
129	PF3D7_0207000.e1_7116	0.0638704434558538	0.248432385853471	0.184561942397617	0.724219132836983	0.483260475235524	1.07821081042985	0.0530064755490222	0.999805500558022	FALSE
130	PF3D7_0207100.s1_9173	-0.00106581358547804	0.157843734735682	0.15890954832116	0.15216004814563	0.207653513250752	0.197542005724962	0.128222479412227	0.999805500558022	FALSE
131	PF3D7_0207200_6262	-0.0360432258485015	-0.0367623293263605	-0.000719103477859029	0.990188089039997	0.243109949834208	0.0872935614630207	-0.000518730672400857	0.999805500558022	FALSE
132	PF3D7_0207300.iso1.exon2.amp1_4172	0.0188678500208718	0.0510363851348604	0.0321685351139886	0.915895386863144	0.15857027921454	0.6375064867496	0.0206349227017445	0.999805500558022	FALSE
133	PF3D7_0207300.iso1.exon5.amp1_1780	-0.0721625893913285	0.045353791110912	0.11751638050224	0.033153852199462	0.224980165393112	0.0734128496918121	0.0917293049170152	0.999805500558022	FALSE
134	PF3D7_0207400.4o4_5635	-0.00593499132235371	0.0487030154870411	0.0546380068093948	0.586231150722038	0.147343932855642	0.201165600875562	0.0590345619296308	0.999805500558022	FALSE
135	PF3D7_0207500.e1s1_8609	-0.084366111706237	-0.130867117524317	-0.0465010058180799	0.92754140691899	0.326883631340094	1.06845027062098	-0.0164553666931679	0.999805500558022	FALSE
136	PF3D7_0207500.e3s1_8088	-0.0387957209648885	0.128899858656003	0.167695579620892	0.803641057370288	0.394812775303677	1.40536454301639	0.046711559656317	0.999805500558022	FALSE
137	PF3D7_0207600.e2s1_8341	-0.0940688879875065	-0.100971668991406	-0.00690278100389992	0.993683419504605	0.369215268700263	1.82838392986227	-0.00163914900996413	0.999805500558022	FALSE
138	PF3D7_0207600.e4s1_8076	-0.0447434055633409	-0.0127340903242903	0.0320093152390506	0.88596426238906	0.416356982432532	0.446382638664748	0.0127081839839639	0.999805500558022	FALSE
139	PF3D7_0207700.2o4_5642	-0.115701106785117	0.698009072706324	0.81371017949144	0.186291659058546	0.47496734498681	1.13869955993374	0.231026429416521	0.999805500558022	FALSE
140	PF3D7_0207700.4o4_8238	-0.0368302855078369	-0.0262504543075426	0.0105798312002943	0.982279651599316	0.331802586856933	0.994810501887856	0.00386796443950784	0.999805500558022	FALSE
141	PF3D7_0208000.4o4_7083	-0.0343704840969403	0.0490351617023098	0.0834056457992501	0.501171632654916	0.260215188256331	0.2387158313208	0.0538973965917253	0.999805500558022	FALSE
142	PF3D7_0208100.iso2.exon10.amp1_1520	-0.00603867807699339	0.142073950168388	0.148112628245382	0.602094499904	0.485411207547914	0.56426457270585	0.0498903692315591	0.999805500558022	FALSE
143	PF3D7_0208100.iso2.exon13.amp1_3822	-0.0791695257251915	-0.0428555822664702	0.0363139434587213	0.960061989453475	0.392135141921079	1.51816658699761	0.00965715830668394	0.999805500558022	FALSE
144	PF3D7_0208700.iso2.exon4.amp1_1767	-0.0873131894579669	0.0572459458174478	0.144559135275415	0.133723753781712	0.250414646029959	0.164552260178395	0.0994020927937066	0.999805500558022	FALSE
145	PF3D7_0208900.e1s3_5063	-0.0410302143497395	-0.0713741354443322	-0.0303439210945927	0.92698677263452	0.241048648796991	0.690786691341001	-0.015631880050821	0.999805500558022	FALSE
146	PF3D7_0209100.2o3_8219	0.0816410761267673	0.0586120346289903	-0.023029041497777	0.947086511547463	0.433695797890099	0.714045934211346	-0.00811244325677238	0.999805500558022	FALSE
147	PF3D7_0209300.1o2_6694	-0.00971870928522405	0.0804160086776427	0.0901347179628668	0.869645431519755	0.20360339967312	1.15023334353811	0.0350353302179387	0.999805500558022	FALSE
148	PF3D7_0209400.2o7_8465	-0.0834982803405793	0.0487027648729462	0.132201045213526	0.424978193656853	0.288930000763436	0.321550983857815	0.0752679849966929	0.999805500558022	FALSE
149	PF3D7_0209800.e2_6830	-0.0131791912668404	0.195832097730328	0.209011288997168	0.467227714408798	0.410631084095016	0.568681263512194	0.0808122627704958	0.999805500558022	FALSE
150	PF3D7_0210200.iso1.exon2.amp2_seg1_2597	-0.00671463261573619	0.0634493968776432	0.0701640294933794	0.916310550345906	0.48793588721092	1.39259699850886	0.017893450205472	0.999805500558022	FALSE
151	PF3D7_0210300.e2_9137	0.0409951302962243	0.0957739296735092	0.0547787993772849	0.841888209248223	0.314073530144402	0.565756686935233	0.0260060289841209	0.999805500558022	FALSE
152	PF3D7_0210600.3o5_4701	-0.0463321306635083	-0.251269384624551	-0.204937253961043	0.658604173600656	0.255661632223872	0.958173383693983	-0.085360912280698	0.999805500558022	FALSE
153	PF3D7_0210700.1o1_6705	-0.0433695606748686	0.129554395631784	0.172923956306653	0.415652886477185	0.154486579326333	0.423889994537222	0.142025291983187	0.999805500558022	FALSE
154	PF3D7_0211100.iso1.exon1.amp1_3153	0.00652331343501665	0.17353729385647	0.167013980421453	0.121336833359782	0.282046225692383	0.182585833112192	0.10203996574493	0.999805500558022	FALSE
155	PF3D7_0211100.iso1.exon1.amp2_1349	-0.00756406486007462	0.208996931592642	0.216560996452717	0.294843154549566	0.275869572446997	0.395614863138548	0.123771913889559	0.999805500558022	FALSE
156	PF3D7_0211200.1o1_7850	-0.0561069310629117	0.0294811471692846	0.0855880782321963	0.815385767263783	0.418312731395841	0.754553080365165	0.0304954145487924	0.999805500558022	FALSE
157	PF3D7_0211300.iso1.exon2.amp1_77	0.00820092247221153	0.123316315015105	0.115115392542893	0.404396513529617	0.17839439229587	0.271416053206045	0.100459806752282	0.999805500558022	FALSE
158	PF3D7_0211900.iso1.exon1.amp1_2450	-0.0662452860067307	0.0800155998824717	0.146260885889202	0.565491295993785	0.269857301029268	0.515691435730572	0.0793901850369065	0.999805500558022	FALSE
159	PF3D7_0212200.iso1.exon2.amp1_4153	-0.0570086686237447	0.0328605019680921	0.0898691705918368	0.476758586879449	0.300074233380916	0.238071235227351	0.050975400814099	0.999805500558022	FALSE
160	PF3D7_0212300.e3s1_4883	0.0149225205386643	0.0456784578676288	0.0307559373289645	0.944111211118208	0.197088952190021	0.919404209583228	0.0143024169270043	0.999805500558022	FALSE
161	PF3D7_0212400.3o3_6803	0.0652067800723694	-0.0136922470387695	-0.0788990271111389	0.293153700389072	0.367788703472043	0.0818697734477746	-0.0378057139985639	0.999805500558022	FALSE
162	PF3D7_0212500.iso1.exon1.amp1_3098	0.00730197245855296	0.088591828762598	0.081289856304045	0.627740102055329	0.150197256931473	0.343221806010298	0.0744214246663325	0.999805500558022	FALSE
163	PF3D7_0212700.1o1_4996	0.0219002034334143	-0.182894121484904	-0.204794324918318	0.0465137470944228	0.163070935375425	0.164955396062873	-0.209040274993728	0.999805500558022	FALSE
164	PF3D7_0212900.1o1_9032	-0.0299265219637451	-0.00218862116029754	0.0277379008034475	0.965652162198102	0.203519043037365	1.35196961757819	0.00943841315625898	0.999805500558022	FALSE
165	PF3D7_0213000.1o1_4661	-0.00791333520070432	-0.120396243918242	-0.112482908717537	0.386616774782595	0.330831243847328	0.238832508606182	-0.0582372125925788	0.999805500558022	FALSE
166	PF3D7_0213400.iso1.exon2.amp1_388	-0.022737507897143	-0.0390790542280879	-0.0163415463309449	0.915989637804821	0.219120506761058	0.316704178909522	-0.0117396661915669	0.999805500558022	FALSE
167	PF3D7_0213400.iso1.exon3.amp1_84	-0.0919101607578902	0.057967617605388	0.149877778363278	0.255448798178906	0.369618492580071	0.231258136805265	0.0699898096565928	0.999805500558022	FALSE
168	PF3D7_0213500.iso1.exon3.amp1_4447	-0.0182550572814995	0.133384181653865	0.151639238935364	0.0889932534613809	0.330640812436628	0.132953045370078	0.0802666408979268	0.999805500558022	FALSE
169	PF3D7_0213900.iso1.exon1.amp2_1348	-0.0772613979742428	-0.0614604376627888	0.015800960311454	0.91405425955637	0.273888392435993	0.29286836963193	0.00953950920279954	0.999805500558022	FALSE
170	PF3D7_0214100.e1s1_6246	-0.144841427766688	0.0155811111914076	0.160422538958096	0.605951008332378	0.486311036267157	0.621946905164624	0.0531351333869178	0.999805500558022	FALSE
171	PF3D7_0214300.iso1.exon1.amp1_2559	-0.0489875308533007	0.1602516489091	0.209239179762401	0.0512430712752424	0.276940000090245	0.171541631004177	0.130469804669431	0.999805500558022	FALSE
172	PF3D7_0214300.iso1.exon1.amp2_2848	0.0232408096710973	0.117181329019257	0.0939405193481601	0.610814453021151	0.281886443603372	0.36990304899828	0.0534406174983478	0.999805500558022	FALSE
173	PF3D7_0215700.e2s2_6920	-0.0985703187762472	0.252015357818915	0.350585676595162	0.301562726625654	0.451136963166115	0.650757771055578	0.122379629134846	0.999805500558022	FALSE
174	PF3D7_0216400.1o1_7065	-0.0302897775530914	0.127532667740013	0.157822445293104	0.473504572972521	0.433168646159085	0.425608702565741	0.0608410836306407	0.999805500558022	FALSE
175	PF3D7_0216700.1.6o7_7390	-0.0518869532387102	-0.0526361360458001	-0.000749182807089896	0.997027730205169	0.21969234668215	0.416057718665977	-0.000500916968299075	0.999805500558022	FALSE
176	PF3D7_0216700.iso2.exon6.amp1_679	-0.101288317606686	-0.127259767394276	-0.0259714497875905	0.946852879999234	0.287699014452633	0.81283713464423	-0.0112903554708074	0.999805500558022	FALSE
177	PF3D7_0216900.1o1_7051	-0.0133258486913165	0.0855257845009945	0.098851633192311	0.466982294603081	0.286978679023005	0.260318055972024	0.0579829493975848	0.999805500558022	FALSE
178	PF3D7_0217400.2o2_6962	-0.067882079928898	0.663107494349345	0.730989574278243	0.0544163050484754	0.417328154634438	0.614875066600976	0.274616163997205	0.999805500558022	FALSE
179	PF3D7_0217700.iso1.exon1.amp1_3848	-0.120200847117106	0.0604474680695503	0.180648315186657	0.20926183994221	0.307771231574472	0.260066210968215	0.0994183525615114	0.999805500558022	FALSE
180	PF3D7_0217900.e1s1_7766	0.0322751488864199	0.0453100628751908	0.0130349139887709	0.961521916271421	0.296597641216857	0.55878713783682	0.00646592094006021	0.999805500558022	FALSE
181	PF3D7_0218300.1o4_6226	-0.0543046060626423	-0.0345944797750345	0.0197101262876078	0.830620314211666	0.273289642000028	0.168351699707065	0.0124574086230579	0.999805500558022	FALSE
182	PF3D7_0218300.2o4_6804	-0.025059287035416	0.0364012432151842	0.0614605302506002	0.100797761822203	0.156644801646491	0.0511912354928205	0.0689010229343111	0.999805500558022	FALSE
183	PF3D7_0218300.e2_6243	-0.0240897991293776	-0.0713338064268783	-0.0472440072975006	0.260884206325527	0.20291399367365	0.0474268699677842	-0.0410187061466397	0.999805500558022	FALSE
184	PF3D7_0219300.1o1_5228	0.0073178577092173	-0.0673522052405442	-0.0746700629497615	0.56047912421576	0.326858755587942	0.240621460279123	-0.0390821302151715	0.999805500558022	FALSE
185	PF3D7_0219400.iso1.exon2.amp1_1777	0.0250742365566413	0.354994232372361	0.329919995815719	0.657534043639148	0.415423583879741	1.53708976683865	0.0852616444468017	0.999805500558022	FALSE
186	PF3D7_0219600.e1s1_8817	0.025223610847619	0.0985930630083285	0.0733694521607095	0.469116578639244	0.314195303078493	0.178536384737444	0.0404714276329587	0.999805500558022	FALSE
187	PF3D7_0219700.2o2_6131	-0.0803832935880922	0.055103852426328	0.13548714601442	0.435213091061711	0.502274572235595	0.311620396186023	0.0465776389734164	0.999805500558022	FALSE
188	PF3D7_0219900.2o2_6693	-0.113411372834007	0.181682486926959	0.295093859760966	0.0356346834435629	0.36669096418841	0.218753709489431	0.139198234071442	0.999805500558022	FALSE
189	PF3D7_0220000.e2s1_7105	0.0270228098901907	0.288236379946147	0.261213570055957	0.15161578799803	0.32765145091569	0.324864989073082	0.132996865565281	0.999805500558022	FALSE
190	PF3D7_0220000.e2s2_7394	-0.0327488497724697	0.159825521849405	0.192574371621874	0.455165710477078	0.527573810866515	0.495040478624743	0.0612445248017371	0.999805500558022	FALSE
191	PF3D7_0220100.e2s1_7661	-0.0733646492201199	0.23803367963206	0.31139832885218	0.296034571328472	0.284283548639926	0.575243096617628	0.157485599663098	0.999805500558022	FALSE
192	PF3D7_0220600.2o2_6976	-0.00876662911483655	0.00732698573596409	0.0160936148508006	0.980307295719411	0.139107760046418	1.3695417970514	0.00564712228888972	0.999805500558022	FALSE
193	PF3D7_0221400.iso1.exon2.amp1_3871	-0.0821121573285936	0.100068911331395	0.182181068659988	0.505334225285938	0.267058966228789	0.551187351975754	0.0974148734469093	0.999805500558022	FALSE
194	PF3D7_0221600.1o1_5812	-0.109559309037477	0.105094448734756	0.214653757772233	0.606463506472967	0.394397442686622	0.850430110783095	0.0765133489052849	0.999805500558022	FALSE
195	PF3D7_0222000.iso1.exon1.amp1_691	-0.0941854468937011	0.128309260336068	0.222494707229769	0.41129708886975	0.331389182287123	0.534115720315791	0.103120480733997	0.999805500558022	FALSE
196	PF3D7_0222100.iso1.exon1.amp1_3007	-0.0663729492775691	0.103842014538699	0.170214963816268	0.74805361363037	0.553467975387302	1.09041897675481	0.0446107213537065	0.999805500558022	FALSE
197	PF3D7_0222500.iso1.exon2.amp1_987	-0.0905097598592311	0.12973330653887	0.220243066398101	0.674350624185376	0.506531885758518	1.0755480694032	0.061469590673664	0.999805500558022	FALSE
198	PF3D7_0222600.iso1.exon2.amp1_1008	-0.0997866828189181	0.0746376384396012	0.174424321258519	0.560700530106067	0.560805462739782	0.588408716516873	0.0515493857945604	0.999805500558022	FALSE
199	PF3D7_0222700.iso1.exon2.amp1_1289	-0.135412955405522	0.294641172328264	0.430054127733786	0.430322030252773	0.295141996613103	1.09391013091099	0.156264148870902	0.999805500558022	FALSE
200	PF3D7_0222800.iso1.exon2.amp1_1564	-0.198102698731483	0.0164380738708964	0.21454077260238	0.663481727521851	0.712676026037649	0.995614693282673	0.0477134154068978	0.999805500558022	FALSE
201	PF3D7_0222900.1o1_4649	0.0321341744155058	-0.0922691871439067	-0.124403361559413	0.346401745714716	0.300545331234836	0.245805063055601	-0.0702926828191595	0.999805500558022	FALSE
202	PF3D7_0223100.iso1.exon2.amp1_989	-0.103794921514162	0.00376571468704263	0.107560636201205	0.304028945749118	0.393403673586267	0.164279736999748	0.0478142780684384	0.999805500558022	FALSE
203	PF3D7_0223200.iso1.exon2.amp1_3607	-0.195653724269456	0.181283013193856	0.376936737463313	0.252236861329046	0.52220007759901	0.61720859439022	0.117735490491451	0.999805500558022	FALSE
204	PF3D7_0223300 (renamed)_6619	-0.0506744315590511	0.00551534928984196	0.0561897808488931	0.872600171064584	0.326146138791329	0.726886924907396	0.0239217231170033	0.999805500558022	FALSE
205	PF3D7_0223300.iso1.exon2.amp1_3611	0.00206283209580233	0.112256566030397	0.110193733934594	0.744754514393033	0.485198406376648	0.687336868295949	0.0358971759281693	0.999805500558022	FALSE
206	PF3D7_0223400.iso1.exon2.amp1_1856	-0.0855389069030007	-0.00555802426982304	0.0799808826331777	0.812174240998556	0.270447671443931	0.698835589832272	0.0385970232950141	0.999805500558022	FALSE
207	PF3D7_0223500.iso1.exon1.amp1_3027	-0.106544699453929	-0.036471064325643	0.0700736351282863	0.8451568202676	0.304343523758405	0.745133055873174	0.030774058213792	0.999805500558022	FALSE
208	PF3D7_0223500.iso1.exon2.amp1_4551	-0.0571028113651124	0.125625553460787	0.182728364825899	0.171329806474784	0.159229363701172	0.243859605684491	0.178392790632028	0.999805500558022	FALSE
209	PF3D7_0300100.iso1.exon2.amp1_138	-0.157914122853452	0.0936781909950817	0.251592313848534	0.0409930454444859	0.458594730249707	0.176218269398802	0.0960997013706346	0.999805500558022	FALSE
210	PF3D7_0300200.iso1.exon1.amp1_3012	-0.167004200086649	0.171345567939103	0.338349768025752	0.425503805767554	0.721874368447253	0.82553511670559	0.0768157518649859	0.999805500558022	FALSE
211	PF3D7_0300400.iso1.exon1.amp1_401	-0.200056355702786	0.148473353727083	0.348529709429869	0.284430020682814	0.535375668133151	0.615347529676288	0.10661503355405	0.999805500558022	FALSE
212	PF3D7_0300500.iso1.exon1.amp1_134	-0.133923418763094	0.102972125800402	0.236895544563496	0.131437734993829	0.400262050672046	0.268524902915572	0.10180106497952	0.999805500558022	FALSE
213	PF3D7_0300700.iso1.exon2.amp1_3592	-0.146321739969953	0.0617883350300268	0.208110074999979	0.193493895414913	0.409141552714508	0.281002181872769	0.0873783945214837	0.999805500558022	FALSE
214	PF3D7_0300800.iso1.exon2.amp1_1572	-0.107836430080741	0.131613565615606	0.239449995696347	0.722253886022439	0.215189109777265	1.40179748188492	0.078342262635186	0.999805500558022	FALSE
215	PF3D7_0300900.iso1.exon2.amp1_1555	-0.0332823418736911	0.182783300983287	0.216065642856978	0.409583720186077	0.13676557393288	0.523603154306483	0.165949457175604	0.999805500558022	FALSE
216	PF3D7_0301100.2o2_9008	0.0318659331749938	0.0499115831076729	0.018045649932679	0.811052086672929	0.256248257815007	0.130450343944163	0.0122521882609811	0.999805500558022	FALSE
217	PF3D7_0301200.iso1.exon3.amp1_short_4317	-0.047175750081233	0.076823667670001	0.123999417751234	0.15528809135725	0.257130689123597	0.146623217523051	0.0835678889393361	0.999805500558022	FALSE
218	PF3D7_0301300.2o2_5567	-0.000742259732731148	-0.0312463566646077	-0.0305040969318765	0.72406569637344	0.150819362070715	0.172841020597601	-0.0331373815139324	0.999805500558022	FALSE
219	PF3D7_0301400.2o2_4671	0.0582201850731955	-0.259252977103476	-0.317473162176671	0.0831872497185492	0.336828235447248	0.309793895657721	-0.158451755490181	0.999805500558022	FALSE
220	PF3D7_0301500.2o2_6419	-0.0709404737622487	0.0349034414561338	0.105843915218382	0.650650688523383	0.269672764667465	0.4762348499992	0.0588535369855466	0.999805500558022	FALSE
221	PF3D7_0301700.e1s1_8026	-0.0427997039955806	0.0654246653078943	0.108224369303475	0.47552044432109	0.366626130028513	0.284988418697606	0.0503170836108593	0.999805500558022	FALSE
222	PF3D7_0301700.e2s1_8045	-0.14692324514217	0.0617052592216655	0.208628504363835	0.703706182344376	0.576604740950521	1.12548348002281	0.0526430445685038	0.999805500558022	FALSE
223	PF3D7_0301800.2o2_9014	-0.155040079555584	0.0512620857308772	0.206302165286461	0.243858570821469	0.608771956284667	0.289083271148766	0.0590796800827672	0.999805500558022	FALSE
224	PF3D7_0301900.1o1_7888	0.0350820412598795	0.263142575458129	0.22806053419825	0.428729033676694	0.529501573541258	0.557148948287723	0.0713611008491136	0.999805500558022	FALSE
225	PF3D7_0302000.iso1.exon2.amp1_158	-0.082913281431087	0.0201496158390974	0.103062897270184	0.86655653355556	0.318012851598671	1.28218520564528	0.0329017194005334	0.999805500558022	FALSE
226	PF3D7_0302200.1o9_6523	-0.0832164901833463	-0.0128460731823374	0.0703704170010089	0.850490201422061	0.208831213650195	0.779605847854562	0.0359732154794386	0.999805500558022	FALSE
227	PF3D7_0302200.9o9_6812	-0.0188777348085221	-0.0604027688715448	-0.0415250340630226	0.488036745605203	0.16158976575308	0.110121387821335	-0.0441639000252209	0.999805500558022	FALSE
228	PF3D7_0302200.e1_5952	-0.0441774203282062	0.0205643617790049	0.0647417821072111	0.910664816760075	0.31284972076808	1.20714197095174	0.0216277877578173	0.999805500558022	FALSE
229	PF3D7_0302200.e2_6826	-0.0280891966287517	0.0766277291336269	0.104716925762379	0.19482013444159	0.238061965408853	0.137637019068813	0.0761839048966833	0.999805500558022	FALSE
230	PF3D7_0302200.e8_5663	-0.0244907742457039	0.0283131020289492	0.0528038762746531	0.393983050573883	0.227826912394091	0.0997843062482072	0.0404893070001777	0.999805500558022	FALSE
231	PF3D7_0302200.e9_5390	-0.0553172544199477	0.0766643298549191	0.131981584274867	0.698076296685639	0.318255190402746	0.699878445596621	0.0578750652467811	0.999805500558022	FALSE
232	PF3D7_0302500.e1s1_7185	-0.0803752946055349	0.23091908629827	0.311294380903805	0.185046096560516	0.331000745395403	0.430346703724989	0.151057528468196	0.999805500558022	FALSE
233	PF3D7_0302500.e6s1_5136	-0.0197918624831855	-0.0250530373584304	-0.00526117487524491	0.939640072663476	0.338168098181327	0.0799457791160677	-0.00274071181359109	0.999805500558022	FALSE
234	PF3D7_0302500.e9s1_6314	-0.076259920591088	0.112759319527759	0.189019240118847	0.802355655507909	0.415492711147489	1.57427325698293	0.0481078078669896	0.999805500558022	FALSE
235	PF3D7_0302800.e1s1_6041	-0.0974369035966659	0.134885366659953	0.232322270256619	0.351099423505963	0.587536451509464	0.461459857843417	0.0673520931498894	0.999805500558022	FALSE
236	PF3D7_0302900.e1s1_5473	-0.0945886290313303	0.000220105070258469	0.0948087341015887	0.690372688393985	0.270908836084867	0.486648322670911	0.0522234373644048	0.999805500558022	FALSE
237	PF3D7_0302900.e1s2_5184	-0.121983512737031	0.0149651620762899	0.136948674813321	0.598890823218397	0.599508329074726	0.499321455732692	0.0387373903154973	0.999805500558022	FALSE
238	PF3D7_0303200.e2s1_6620	-0.050021878867751	-0.0151899677631992	0.0348319111045518	0.851774630898381	0.134445349126918	0.388234581480376	0.0320474259936155	0.999805500558022	FALSE
239	PF3D7_0303700.e1s1_6024	0.026344483456873	0.290131581558413	0.26378709810154	0.657665901771509	0.343231767550754	1.22917760650817	0.0842062857261215	0.999805500558022	FALSE
240	PF3D7_0303800.1o1_7036	0.0363640451373218	0.13382449056684	0.0974604454295178	0.415816938709016	0.180090227348398	0.234318810672146	0.08691228080225	0.999805500558022	FALSE
241	PF3D7_0304000.e4s1_5769	-0.111925930339847	0.00160209495717361	0.11352802529702	0.897647509754761	0.298058347611093	1.85018872732944	0.0279185369315529	0.999805500558022	FALSE
242	PF3D7_0304100.1o1_7041	-0.00884740417900006	0.112231984476673	0.121079388655673	0.767875616498658	0.19033850543912	0.854704222546906	0.0599329689680984	0.999805500558022	FALSE
243	PF3D7_0304200.e1s1_8348	-0.0491153398094753	0.129722178741844	0.178837518551319	0.759575102185509	0.229040240166391	1.21793529671279	0.0648193200788851	0.999805500558022	FALSE
244	PF3D7_0304600_7131	0.573020115975215	0.926872086700332	0.353851970725117	0.270240248020464	0.574910262843705	0.600792454483863	0.102061107333464	0.999805500558022	FALSE
245	PF3D7_0305100.e1s3_8820	-0.028827150897087	0.0779827159426009	0.106809866839688	0.258594767572795	0.283993424804787	0.162988871765223	0.0651578451511315	0.999805500558022	FALSE
246	PF3D7_0305200.iso1.exon1.amp1_3725	-0.113269235236364	-0.0967899247365448	0.0164793104998191	0.958028069287784	0.365886838339583	0.646153987652229	0.00675358799288076	0.999805500558022	FALSE
247	PF3D7_0305200.iso1.exon1.amp2_4239	-0.0435127481566693	-0.107381034205995	-0.0638682860493257	0.815023111015434	0.281416772384918	0.563749272878443	-0.0327400297490275	0.999805500558022	FALSE
248	PF3D7_0305500.e1s3_9107	-0.182848753401405	-0.0241441809914196	0.158704572409985	0.784145629998895	0.780453655750339	1.18275923481481	0.0316857464761277	0.999805500558022	FALSE
249	PF3D7_0305600.1o1_7038	-0.0239660242246951	0.0311397625833251	0.0551057868080203	0.923081349908633	0.490628727316823	1.18724158066243	0.0150869479089315	0.999805500558022	FALSE
250	PF3D7_0306200.5o5_6140	-0.0635732353753999	-0.00431922032092054	0.0592540150544794	0.886926166610511	0.389223767202924	0.864675810051568	0.0211641708901447	0.999805500558022	FALSE
251	PF3D7_0307300.1o1_7034	-0.0705794559602825	0.0387862276585313	0.109365683618814	0.386691692744002	0.37865781649595	0.222931143287657	0.0499860654488987	0.999805500558022	FALSE
252	PF3D7_0307500.iso1.exon4.amp1_417	-0.0685813598247301	0.126284278301725	0.194865638126455	0.659758555438045	0.687483955319512	0.889581698563858	0.0455650423125204	0.999805500558022	FALSE
253	PF3D7_0307700.e3s2_7088	-0.0899461213749927	0.166308742637982	0.256254864012975	0.257773293167166	0.512983306531032	0.412961540059762	0.0849336199978948	0.999805500558022	FALSE
254	PF3D7_0308000.1o1_8767	-0.114770250951126	0.128564707848643	0.243334958799769	0.686526135837003	0.391079133183071	1.24650402750169	0.0730065641111474	0.999805500558022	FALSE
255	PF3D7_0308100.iso1.exon1.amp2_3062	-0.0339997133717192	0.112326886460515	0.146326599832234	0.698025389678554	0.290637494524247	0.778618497266519	0.0646171679022483	0.999805500558022	FALSE
256	PF3D7_0308300.e1s1_6328	-0.069586236167954	-0.112461465004292	-0.0428752288363378	0.806393357365124	0.315138061437952	0.35027812835257	-0.0223844600224779	0.999805500558022	FALSE
257	PF3D7_0308700.iso1.exon1.amp1_2745	-0.0236583165860923	-0.0492568088861987	-0.0255984923001063	0.897764937783355	0.436908785933917	0.390503038868873	-0.00987598822689819	0.999805500558022	FALSE
258	PF3D7_0308900.iso1.exon1.amp2_1908	-0.00160897222567013	-0.0620435160431182	-0.060434543817448	0.197624723012532	0.148844135475874	0.0782291499736087	-0.0705679010602035	0.999805500558022	FALSE
259	PF3D7_0309000.iso1.exon1.amp1_144	-0.154704344432784	0.0773688433046928	0.232073187737476	0.0861006843902917	0.525660452040742	0.195314711239326	0.0773801018097466	0.999805500558022	FALSE
260	PF3D7_0309100.iso1.exon5.amp1_2930	0.00874015345804924	-0.0750120013162665	-0.0837521547743157	0.753571672347127	0.118327515214051	0.555540769223501	-0.0645672642456501	0.999805500558022	FALSE
261	PF3D7_0309200.iso1.exon3.amp2_2542	-0.017113044793172	0.0492377125613995	0.0663507573545715	0.427327341239564	0.162848301274186	0.16067605164503	0.0680067043261976	0.999805500558022	FALSE
262	PF3D7_0309600.e1s1_5717	-0.0280398947269968	-0.0218831970077733	0.00615669771922349	0.930171391835217	0.212817638625148	0.127662533906519	0.00500277745983566	0.999805500558022	FALSE
263	PF3D7_0309900.iso1.exon2.amp1_655	-0.0767057807023088	-0.0719277401095095	0.00477804059279928	0.988291436926428	0.322033296607134	0.67553235569815	0.00210669402251761	0.999805500558022	FALSE
264	PF3D7_0310200.e1s3_7089	-0.11599851373503	0.174813132437754	0.290811646172783	0.405009005331789	0.589845795523975	0.676999863385642	0.080760161013201	0.999805500558022	FALSE
265	PF3D7_0310300.e1s1_6333	-0.0931731431787925	-0.0106464321824966	0.082526710996296	0.587179988271225	0.440862750758602	0.276518101182955	0.0323066580826324	0.999805500558022	FALSE
266	PF3D7_0310300.e1s2_6327	-0.0466465737496943	-0.054603357569918	-0.00795678382022377	0.978580095094341	0.354980750658275	0.611037392174384	-0.00338484526896945	0.999805500558022	FALSE
267	PF3D7_0310500.e1s1_7495	-0.0289379969820787	0.123544373262673	0.152482370244751	0.350499619505395	0.323539972731935	0.309166122048681	0.0789308563164711	0.999805500558022	FALSE
268	PF3D7_0310500.e1s2_7206	-0.034845050613676	0.0264535296169012	0.0612985802305771	0.91595610098312	0.340930970978241	1.21450892306475	0.0197638526479024	0.999805500558022	FALSE
269	PF3D7_0310500.e1s3_8946	-0.116864808635464	-0.00614635158725001	0.110718457048214	0.618790648799484	0.474359538546362	0.432386736956776	0.0392718007957725	0.999805500558022	FALSE
270	PF3D7_0310700.2o2_7252	-0.0527207136797637	-0.161883933069558	-0.109163219389794	0.528472725175551	0.34700461145822	0.336299028503364	-0.0526090641581754	0.999805500558022	FALSE
271	PF3D7_0310800.1o1_6383	-0.0593386771128912	-0.0165518597460586	0.0427868173668326	0.559465590614975	0.288098731431986	0.114092998709877	0.0260002711406442	0.999805500558022	FALSE
272	PF3D7_0310800_9158	0.045397252049431	0.00200392385612815	-0.0433933281933028	0.948489723558429	0.276321059899522	1.40828884596092	-0.0134709822977259	0.999805500558022	FALSE
273	PF3D7_0311100.iso1.exon3.amp1_1794	-0.0265454288585631	-0.0764384493466419	-0.0498930204880788	0.897520259493711	0.215124004152188	0.81004427833829	-0.0246236149552539	0.999805500558022	FALSE
274	PF3D7_0311400.iso1.exon1.amp1_2120	-0.0883516658258799	-0.14969870480665	-0.0613470389807699	0.890689602396982	0.331450886513945	0.930289599399219	-0.0232247471956667	0.999805500558022	FALSE
275	PF3D7_0311400.iso1.exon2.amp1_782	0.00133472728031791	0.0576093533576568	0.0562746260773389	0.911242636218561	0.334138182278567	1.0541421385469	0.0198742240656014	0.999805500558022	FALSE
276	PF3D7_0311400.iso1.exon2.amp2_1071	0.0153257638794437	-0.078532577072782	-0.0938583409522257	0.29026666025155	0.358991664678865	0.131310612374427	-0.0458365556170774	0.999805500558022	FALSE
277	PF3D7_0311600.2o5_9087	-0.0562728683539071	0.0696759677448917	0.125948836098799	0.546765436052944	0.246704314870822	0.421180570326535	0.0772650240013717	0.999805500558022	FALSE
278	PF3D7_0311700.1o15_9041	-0.0790686531741062	0.160441599700453	0.23951025287456	0.0366528097293865	0.36364780294054	0.173416802365442	0.114810451667035	0.999805500558022	FALSE
279	PF3D7_0311800.e3_7124	-0.0212316137597312	-0.0247748179911007	-0.00354320423136946	0.978745639818002	0.33963814490116	0.253661578581662	-0.00178307138573283	0.999805500558022	FALSE
280	PF3D7_0311900.1o1_5052	-0.032257569725595	0.0767333993943193	0.108990969119914	0.618938315372584	0.262992803293866	0.444667896481275	0.0628819108508008	0.999805500558022	FALSE
281	PF3D7_0312200.iso1.exon1.amp1_3720	-0.000676294799673016	0.0162703875232271	0.0169466823229001	0.801783357622	0.190191781284701	0.125207909527205	0.0153412880681298	0.999805500558022	FALSE
282	PF3D7_0312300.1o1_7872	-0.0383820765239832	0.0938132122616533	0.132195288785637	0.399136347256868	0.149729950568957	0.310522803588935	0.125865602248743	0.999805500558022	FALSE
283	PF3D7_0312400.2o7_8753	0.314445972969032	0.434627797764585	0.120181824795553	0.588235949722927	0.779209714288966	0.373479050006118	0.0268819990771634	0.999805500558022	FALSE
284	PF3D7_0313000.1o2_7579	-0.123004745341246	-0.129165809485236	-0.00616106414399065	0.98835472043185	0.445521344307919	0.874194712470554	-0.00200860724179263	0.999805500558022	FALSE
285	PF3D7_0313100.1o4_8505	0.00745203619376263	-0.14943875920859	-0.156890795402352	0.584163385950131	0.450936587956356	0.571901221516357	-0.0561209522746828	0.999805500558022	FALSE
286	PF3D7_0313200.1o1_9000	-0.0505260930438503	-0.00460914003696899	0.0459169530068813	0.772146117598401	0.334137072617655	0.311429487969232	0.0230721679486874	0.999805500558022	FALSE
287	PF3D7_0313300.iso1.exon5.amp1_931	-0.0505551701179879	-0.00464965249137705	0.0459055176266108	0.825858275749825	0.304885055284529	0.424752266485478	0.0238773594091649	0.999805500558022	FALSE
288	PF3D7_0313400.iso1.exon1.amp1_445	-0.0278783501156888	0.130879373969742	0.158757724085431	0.617332698041539	0.244875483784941	0.651620390369408	0.0834725197844696	0.999805500558022	FALSE
289	PF3D7_0313600.5o6_7614	0.0130763616571445	-0.0195599751943025	-0.032636336851447	0.711022282577497	0.193223636117235	0.171516067607197	-0.0284883830291559	0.999805500558022	FALSE
290	PF3D7_0313700.iso1.exon2.amp1_2360	-0.0307498161406405	0.27227492234179	0.303024738482431	0.576571258328456	0.252195210552658	1.11327069641812	0.114591827285594	0.999805500558022	FALSE
291	PF3D7_0313800.5o5_7343	-0.0629903022026667	0.0677800400212018	0.130770342223869	0.603031761248469	0.290836414927403	0.510156618562882	0.0675494637518779	0.999805500558022	FALSE
292	PF3D7_0315100.e1s1_7183	-0.0623187579118246	0.117642960630609	0.179961718542434	0.186958511945137	0.342024911557108	0.239610727609585	0.0902855625741001	0.999805500558022	FALSE
293	PF3D7_0315200.iso1.exon1.amp3_2789	-0.0200185616771738	0.0706715229882597	0.0906900846654335	0.593905170600193	0.29026207768429	0.337643105097129	0.051081229439786	0.999805500558022	FALSE
294	PF3D7_0315400.1o1_8147	-0.139759381536307	-0.0798112161801583	0.0599481653561489	0.841766437817096	0.546511254696369	0.601375994039044	0.0180716038854861	0.999805500558022	FALSE
295	PF3D7_0315900.2o2_5837	-0.0239554947549765	0.0407540975005919	0.0647095922555683	0.837192751509781	0.325100501592542	0.650805590268924	0.0287207498976732	0.999805500558022	FALSE
296	PF3D7_0316300.1.e3_6827	-0.0812154385058086	0.196764336996118	0.277979775501927	0.355718471834946	0.280596094400673	0.590721153080833	0.14048524597149	0.999805500558022	FALSE
297	PF3D7_0316500.e1s1_5735	-0.030944601375916	0.179671823931373	0.210616425307289	0.613847131184597	0.29168889768373	0.856815731480867	0.0885351784549166	0.999805500558022	FALSE
298	PF3D7_0317200.iso1.exon1.amp1_4590	-0.0524098937505583	0.0684736470882811	0.120883540838839	0.482678907315015	0.351916670723543	0.331840075345308	0.0576059139652465	0.999805500558022	FALSE
299	PF3D7_0317200.iso1.exon1.amp2_3936	-0.0698251676691749	0.0998158071820981	0.169640974851273	0.367280040433024	0.415485352611051	0.35287300484281	0.0691280076209154	0.999805500558022	FALSE
300	PF3D7_0317300.s2_8011	-0.0284282598731579	0.0357116859626291	0.0641399458357871	0.856876262722814	0.335726632211609	0.737163898580729	0.0266776888069117	0.999805500558022	FALSE
301	PF3D7_0317300.s3_7150	-0.0110480533303528	0.0156547055458571	0.0267027588762099	0.879887447729774	0.391725631530092	0.345659477962838	0.0115035185086732	0.999805500558022	FALSE
302	PF3D7_0317400.iso1.exon1.amp1_643	-0.0850945914756898	-0.0811971029531357	0.00389748852255409	0.986964569274131	0.306664728740272	0.490395403496102	0.001955764660984	0.999805500558022	FALSE
303	PF3D7_0317400.iso1.exon2.amp1_3902	-0.0116240464512499	0.0479150306306675	0.0595390770819174	0.768407329015139	0.323863766111518	0.408176221270547	0.0296849126063638	0.999805500558022	FALSE
304	PF3D7_0317500.iso1.exon1.amp1_3396	-0.0205902033547236	0.126484029217416	0.147074232572139	0.453452682431987	0.354642705732442	0.381250963356343	0.0685283254580258	0.999805500558022	FALSE
305	PF3D7_0317500.iso1.exon2.amp1_942	-0.00573412181129767	-0.0598816947671356	-0.0541475729558379	0.684054723556881	0.210848437637005	0.267522442416907	-0.0414210199692312	0.999805500558022	FALSE
306	PF3D7_0317700.e1s1_8247	0.0679196206594415	-0.041072006405091	-0.108991627064533	0.599651907153899	0.325156022939918	0.41499865490717	-0.0540109356542245	0.999805500558022	FALSE
307	PF3D7_0317700.e9s1_9185	-0.0647195128751714	-0.0429946233289598	0.0217248895462116	0.886655018821265	0.355035006198448	0.295742682106765	0.0103764675645221	0.999805500558022	FALSE
308	PF3D7_0317800.1o1_7265	-0.0162638018417224	0.116986384066239	0.133250185907962	0.515140358637688	0.267487360178488	0.409355110290051	0.077451797708652	0.999805500558022	FALSE
309	PF3D7_0318200.e1s1_8532	-0.197859199194264	0.172735896688753	0.370595095883016	0.257808989782245	0.358552520277249	0.622662786935997	0.15570737486476	0.999805500558022	FALSE
310	PF3D7_0318200.e1s2_8534	-0.08828250876925	-0.0369062470303781	0.0513762617388719	0.630785647519176	0.532305882572942	0.114387886281165	0.0170128242099041	0.999805500558022	FALSE
311	PF3D7_0318200.e1s3_5066	0.0154963383243897	0.0298787019855478	0.0143823636611581	0.973496733016247	0.523440035231917	0.892231710779814	0.00416016416255819	0.999805500558022	FALSE
312	PF3D7_0318500.iso1.exon1.amp3_2251	-0.125276023940374	-0.113964107419129	0.0113119165212447	0.975659122251721	0.50360356216353	0.760074055563999	0.00350320260843637	0.999805500558022	FALSE
313	PF3D7_0318500.iso1.exon1.amp4_222	-0.127436476605881	-0.0468648165060969	0.0805716600997838	0.707187316696109	0.563469250961396	0.403609110782285	0.0245041050970132	0.999805500558022	FALSE
314	PF3D7_0318500.iso1.exon1.amp5_162	-0.0759657190778176	0.262409375711174	0.338375094788992	0.4411471789012	0.352669443177458	0.879599927023551	0.127215805182912	0.999805500558022	FALSE
315	PF3D7_0318600.iso1.exon1.amp1_836	-0.159582916074768	0.0984194979141673	0.258002413988935	0.592419645631144	0.309196145479818	0.988087093887531	0.0977637059620906	0.999805500558022	FALSE
316	PF3D7_0318600.iso1.exon1.amp2_200	-0.106002786902264	0.119047886966595	0.225050673868858	0.311306524899832	0.317720593426102	0.42616533217839	0.113138632624581	0.999805500558022	FALSE
317	PF3D7_0319000.iso1.exon1.amp1_3432	-0.087164938203422	0.049071430062666	0.136236368266088	0.669123644455111	0.551799009043624	0.635943520331839	0.0404187038583307	0.999805500558022	FALSE
318	PF3D7_0319100.1o1_7545	-0.0684500331916529	-0.00864245803702808	0.0598075751546248	0.692302532356635	0.369238762452855	0.288602150268756	0.0275990496462108	0.999805500558022	FALSE
319	PF3D7_0319700.e1s1_5124	-0.0114696523523593	-0.0036141394665254	0.00785551288583394	0.949884584996773	0.385228849874669	0.225709825503692	0.0035298563461612	0.999805500558022	FALSE
320	PF3D7_0319900.1o1_4676	0.0497293826515296	0.111405373161516	0.0616759905099865	0.925806975912079	0.40427122017593	1.38452310787512	0.0171736506606483	0.999805500558022	FALSE
321	PF3D7_0320200.iso1.exon1.amp1_3627	-0.0699447475199799	0.137127360318641	0.207072107838621	0.530694687435632	0.245903292070881	0.671098061316591	0.107124859159788	0.999805500558022	FALSE
322	PF3D7_0320400.e1s3_6638	-0.101563697912094	-0.0248408440080873	0.0767228539040063	0.572891325202704	0.481668672287576	0.227676788137581	0.0277728125742378	0.999805500558022	FALSE
323	PF3D7_0320500.1o1_8174	-0.0811454310712812	0.00962428678037917	0.0907697178516604	0.765882828185784	0.348657072126263	0.626041908021778	0.038854073126653	0.999805500558022	FALSE
324	PF3D7_0320800.e1s1_8898	-0.127274703305086	-0.143085758506164	-0.0158110552010784	0.968080842686445	0.43800702182019	0.816946090221697	-0.00532724009662527	0.999805500558022	FALSE
325	PF3D7_0320800.e2s1_4867	-0.0598841918249679	0.135016642777409	0.194900834602377	0.259920298342046	0.403465503164093	0.314464786578649	0.082326435278387	0.999805500558022	FALSE
326	PF3D7_0321500.iso1.exon1.amp1_841	-0.0387745984335001	0.0973432966087444	0.136117895042244	0.37299221048789	0.130772523981265	0.301496145631834	0.142624028432922	0.999805500558022	FALSE
327	PF3D7_0321600.e1_7117	-0.0278852440441274	0.0522907736372382	0.0801760176813656	0.539888652309289	0.190774280530915	0.260915913689485	0.0668843832918872	0.999805500558022	FALSE
328	PF3D7_0321800.iso1.exon1.amp1_234	-0.0593337903885046	0.0029974088124348	0.0623311992009394	0.787649259359257	0.223180996605341	0.478129291099167	0.0393560991581979	0.999805500558022	FALSE
329	PF3D7_0322100.1o1_9067	-0.148819980183864	0.0803960559386617	0.229216036122526	0.379482078395397	0.559418109578788	0.492034790293564	0.0691654922688562	0.999805500558022	FALSE
330	PF3D7_0322900.e2_5953	-0.00894102462303286	-0.0481781023725993	-0.0392370777495665	0.951342136800112	0.251499765983624	1.34847953895029	-0.0128679660503126	0.999805500558022	FALSE
331	PF3D7_0323300.1o1_6145	-0.032453119178735	-0.0218471674558732	0.0106059517228618	0.933525357258057	0.239810946576207	0.254210244557504	0.00732091373924347	0.999805500558022	FALSE
332	PF3D7_0323600.e1_5672	0.0297655724169313	0.0122760231854155	-0.0174895492315158	0.900989606850694	0.662792575848004	0.174078625576433	-0.00464474218687048	0.999805500558022	FALSE
333	PF3D7_0323800.e2s1_7381	-0.125242942570424	0.0206266712669237	0.145869613837348	0.394911707369299	0.61141842138649	0.281340532674701	0.0416273649711186	0.999805500558022	FALSE
334	PF3D7_0324100.2o2_5248	-0.0377001149730007	0.0242369608089319	0.0619370757819326	0.880695797653658	0.425992988570208	0.853952393713666	0.0209697559685549	0.999805500558022	FALSE
335	PF3D7_0324400.iso1.exon2.amp1_1578	-0.0589586809346657	-0.00853280286949563	0.05042587806517	0.589685823055863	0.391809550324301	0.13711031570795	0.0225789995906353	0.999805500558022	FALSE
336	PF3D7_0324600.iso1.exon2.amp1_3003	-0.177828244845325	0.122804550131172	0.300632794976497	0.354160958673012	0.757133968873013	0.602274331262812	0.0675707343774112	0.999805500558022	FALSE
337	PF3D7_0324800.iso1.exon2.amp1_2158	-0.129872228263951	0.0335606894514576	0.163432917715408	0.128006152542258	0.48298434357527	0.135279631940813	0.0595267863163083	0.999805500558022	FALSE
338	PF3D7_0324900.iso1.exon1.amp1_2456	-0.109767279307726	0.169455252443238	0.279222531750964	0.0921540435873541	0.320510806856947	0.282325552946627	0.147038662904121	0.999805500558022	FALSE
339	PF3D7_0324900.iso1.exon2.amp1_2239	-0.0309211832779684	0.053305146719326	0.0842263299972944	0.808943906754578	0.213327018811014	0.725710250707866	0.0446217522717487	0.999805500558022	FALSE
340	PF3D7_0400100.iso1.exon1.amp1_3682	-0.0120687083106585	0.194734339845307	0.206803048155966	0.664917936931079	0.217690618623985	0.988031471804829	0.0888190335567562	0.999805500558022	FALSE
341	PF3D7_0400100.iso1.exon1.amp2_3971	-0.0373993599604144	0.0932934708793834	0.130692830839798	0.769158938848294	0.201396536948031	0.928036581929896	0.0600105614436343	0.999805500558022	FALSE
342	PF3D7_0400100.iso1.exon1.amp3_4260	-0.0313513500601729	0.00624052791843326	0.0375918779786062	0.458168061671213	0.202959098908097	0.0770369579478188	0.0324514931378417	0.999805500558022	FALSE
343	PF3D7_0400100.iso1.exon2.amp1_4192	-0.13657941430967	0.0481666885361463	0.184746102845816	0.574734043021435	0.369135772063973	0.666753739951812	0.0745659536441974	0.999805500558022	FALSE
344	PF3D7_0400200.iso1.exon1.amp1_1876	-0.145550954393546	0.131130598710486	0.276681553104032	0.224517655710436	0.471032942278248	0.415370006201855	0.0991312375315696	0.999805500558022	FALSE
345	PF3D7_0400300.iso1.exon1.amp1_2731	-0.181822648506602	0.00020546020937644	0.182028108715978	0.433274300241613	0.704376447633066	0.41075426063537	0.0447423786625295	0.999805500558022	FALSE
346	PF3D7_0400400.iso1.exon1.amp1_1294	0.0138798364369808	0.0834372037975118	0.069557367360531	0.806982173109154	0.413989233621845	0.579333480788721	0.0266214371533164	0.999805500558022	FALSE
347	PF3D7_0400500.iso1.exon2.amp1_998	-0.167806266831198	0.0578215203874851	0.225627787218683	0.436072048718476	0.675102932089297	0.544935673162733	0.0568127131689899	0.999805500558022	FALSE
348	PF3D7_0400700.iso1.exon1.amp1_992	-0.108853591498683	0.0686411347936172	0.1774947262923	0.65380266229885	0.495457999302985	0.80412185443834	0.0549285984941246	0.999805500558022	FALSE
349	PF3D7_0400800.iso1.exon1.amp1_3008	-0.110147272328537	0.0390941408655269	0.149241413194064	0.629870894773035	0.517739313333454	0.617680245620888	0.0469511299688724	0.999805500558022	FALSE
350	PF3D7_0400900.iso1.exon1.amp1_1573	-0.0763072396068584	-0.0531351993647164	0.023172040242142	0.939262400295483	0.258494130375078	0.632895251670983	0.0119812712127161	0.999805500558022	FALSE
351	PF3D7_0401000.iso1.exon1.amp1_2432	-0.0781516328398031	0.178804162502755	0.256955795342558	0.22011583988141	0.407813938415859	0.383517061412935	0.105694521778097	0.999805500558022	FALSE
352	PF3D7_0401200.iso1.exon2.amp1_2164	-0.115377334786092	0.0707397774780919	0.186117112264183	0.113577136032959	0.45559224606532	0.172628419006426	0.0715768359206154	0.999805500558022	FALSE
353	PF3D7_0401300.iso1.exon2.amp1_3599	-0.0830135197431805	0.080082691468332	0.163096211211512	0.341459792400812	0.274617500973086	0.329267925599294	0.0966617269444464	0.999805500558022	FALSE
354	PF3D7_0401400.iso1.exon2.amp1_1862	-0.138572148867595	-0.047553147368647	0.0910190014989478	0.831216272368398	0.422015126548897	0.883392352712618	0.0306466066240302	0.999805500558022	FALSE
355	PF3D7_0401600.iso2.exon3.amp1_3896	-0.029659942597005	-0.031436427414231	-0.001776484817226	0.986107189189791	0.257280848180679	0.195124802600038	-0.00117896853142386	0.999805500558022	FALSE
356	PF3D7_0401900.1o1_7666	-0.00978281095231755	0.0904915759605725	0.10027438691289	0.650077272570105	0.289582863654985	0.448088306841599	0.0537018440481985	0.999805500558022	FALSE
357	PF3D7_0402000 (renamed)_9038	-0.00236311466001194	0.10490269994403	0.107265814604042	0.845114094656433	0.384292962335352	1.14375348745525	0.0339910630866345	0.999805500558022	FALSE
358	PF3D7_0402000.e1s1_9149	-0.0172206126346892	0.0604293477664534	0.0776499604011426	0.266565123931867	0.249322682700094	0.112545111308062	0.0543679358549699	0.999805500558022	FALSE
359	PF3D7_0402100.e2s1_6909	0.0418787824285273	0.00645027535608342	-0.0354285070724439	0.921286933072866	0.20656428145084	0.749849110267229	-0.0186349808989175	0.999805500558022	FALSE
360	PF3D7_0402200 (renamed)_8951	0.0335054912719584	0.109885845176895	0.0763803539049371	0.894902859873424	0.221256399112078	1.21151022590792	0.0280069728586475	0.999805500558022	FALSE
361	PF3D7_0402400.2o2_4672	-0.0356249427338981	-0.242715861617959	-0.207090918884061	0.449225616603065	0.317428901369646	0.544347229574024	-0.0986190721958856	0.999805500558022	FALSE
362	PF3D7_0402600.iso1.exon1.amp1_4449	-0.175095491574895	0.171723339943257	0.346818831518152	0.497853346490994	0.554010223346883	1.02732945619767	0.0925482303894836	0.999805500558022	FALSE
363	PF3D7_0403500.1o1_6443	-0.0715717544283475	0.145464098598641	0.217035853026988	0.196119320964023	0.385734562428544	0.29962594778349	0.0959132709154035	0.999805500558022	FALSE
364	PF3D7_0403900.iso1.exon1.amp1_1235	-0.104356980026479	0.0730976571364454	0.177454637162924	0.0531829940547092	0.307542845016878	0.1394753501102	0.100715090259986	0.999805500558022	FALSE
365	PF3D7_0404100.iso1.exon1.amp1_2815	-0.00173324400055248	0.0212285968488892	0.0229618408494417	0.905600676876664	0.327849054447648	0.39089935317786	0.011408803285796	0.999805500558022	FALSE
366	PF3D7_0404100.iso1.exon2.amp1_674	-0.058299830591252	-0.0294402319050537	0.0288595986861983	0.834870322275998	0.209378689782571	0.28131985698237	0.0220089143195925	0.999805500558022	FALSE
367	PF3D7_0404200.iso1.exon2.amp1_2698	-0.0454315360065483	0.0536806015079961	0.0991121375145444	0.427543963659012	0.271675530292179	0.237076594637039	0.061624982981157	0.999805500558022	FALSE
368	PF3D7_0404600.s3_7434	-0.0973377437820283	0.0184749120745874	0.115812655856616	0.295080861256712	0.384310665747548	0.181481270252484	0.0525446526803351	0.999805500558022	FALSE
369	PF3D7_0404600.s5_7440	-0.0513006746106935	0.164917671610599	0.216218346221292	0.596188681976194	0.323474254472971	0.834678134082484	0.0872935379903161	0.999805500558022	FALSE
370	PF3D7_0404700.1o2_6213	-0.0760845336624106	0.020892637407794	0.0969771710702046	0.806542641138408	0.227944318517532	0.825379539887934	0.0462969074412656	0.999805500558022	FALSE
371	PF3D7_0404800.1o2_6179	0.0222675484156915	-0.00564250041173651	-0.027910048827428	0.841502335451908	0.369607686311036	0.263439193924882	-0.0129442059944279	0.999805500558022	FALSE
372	PF3D7_0404800.e1_7407	0.0287371396753726	0.191134846080941	0.162397706405569	0.550660174385221	0.430967790572494	0.540794903298302	0.0608897689728743	0.999805500558022	FALSE
373	PF3D7_0405300.iso1.exon1.amp1_1116	-0.0735583051836357	-0.0130323035170129	0.0605260016666228	0.807605839147318	0.450843282370359	0.497351550300213	0.0221101949699358	0.999805500558022	FALSE
374	PF3D7_0405300.iso1.exon1.amp2_3940	-0.00683223799056246	0.0398204396590355	0.046652677649598	0.850096156255279	0.199112907234996	0.513186628683475	0.0306150484520969	0.999805500558022	FALSE
375	PF3D7_0405400.e2s1_6356	-0.06499069593535	-0.0642513071575358	0.000739388777814182	0.995805280774057	0.408335219674706	0.259277069400503	0.000312323233412595	0.999805500558022	FALSE
376	PF3D7_0405400.e2s4_7512	-0.145672403447232	0.538827132260662	0.684499535707894	0.252539346667853	0.561994490846029	1.1381839852921	0.175060608045552	0.999805500558022	FALSE
377	PF3D7_0405600.2o9_6125	-0.0727628737713115	-0.0985863375326314	-0.0258234637613199	0.884643292298847	0.193891693937968	0.367746232774042	-0.019554496214975	0.999805500558022	FALSE
378	PF3D7_0405700.iso1.exon1.amp1_1975	-0.101908960939077	0.0227874015043373	0.124696362443414	0.333232805996369	0.489419294466426	0.201718454591437	0.0445692165961779	0.999805500558022	FALSE
379	PF3D7_0405700.iso1.exon1.amp3_181	-0.0607954068492202	0.122305059049559	0.183100465898779	0.175211748297208	0.258219081920043	0.242963075187587	0.118941772031892	0.999805500558022	FALSE
380	PF3D7_0405900.e3s1_6875	-0.0233806332460334	-0.037645414796518	-0.0142647815504846	0.916550395947666	0.160929100350117	0.280661409924922	-0.0133378352431496	0.999805500558022	FALSE
381	PF3D7_0406200_8002	0.0250260252985771	0.251613130562686	0.226587105264109	0.538676389711247	0.562773220669821	0.733122755982558	0.0646476380104943	0.999805500558022	FALSE
382	PF3D7_0406500.iso1.exon2.amp4_169	0.0321012879210434	-0.0498063321030248	-0.0819076200240682	0.922358853997768	0.502821614134682	1.75702770998699	-0.0181172836394228	0.999805500558022	FALSE
383	PF3D7_0406700.iso1.exon9.amp1_3850	-0.121630467337147	-0.023112059847514	0.0985184074896328	0.231952814921699	0.338521763663535	0.119046582843777	0.0510534016350189	0.999805500558022	FALSE
384	PF3D7_0406800.iso1.exon3.amp1_3542	-0.0490855099812399	0.163191634761934	0.212277144743174	0.122706706166853	0.236823751236297	0.241159827171266	0.149086031454676	0.999805500558022	FALSE
385	PF3D7_0406900.4o8_8241	-0.0921685506965662	-0.104030505362052	-0.0118619546654863	0.877248096785215	0.372658765048415	0.0889981110745088	-0.00560695806150346	0.999805500558022	FALSE
386	PF3D7_0407000.1o1_5004	-0.0151146908862005	0.0729768741292272	0.0880915650154277	0.481010826668806	0.386154835328479	0.220757205306514	0.0395278597310589	0.999805500558022	FALSE
387	PF3D7_0407200.iso1.exon5.amp1_341	-0.157634561079898	0.165307239153368	0.322941800233266	0.719111723051682	0.393455131492679	1.86600471593619	0.0743196277406008	0.999805500558022	FALSE
388	PF3D7_0407700.e2s1_5470	-0.0115092942905487	0.0470481710796381	0.0585574653701868	0.225870526490336	0.168696601697538	0.0781043859253199	0.0605562742463679	0.999805500558022	FALSE
389	PF3D7_0407700.e2s2_6343	0.0431490770911651	0.0672460385202768	0.0240969614291117	0.954371120784936	0.544135358546453	0.865380815705977	0.00682378845437336	0.999805500558022	FALSE
390	PF3D7_0408000.iso1.exon1.amp1_683	0.0151936829348572	-0.0188121030490162	-0.0340057859838734	0.520862343424648	0.267198924041755	0.0539330499132261	-0.022440888995181	0.999805500558022	FALSE
391	PF3D7_0408600_7148	-0.043555008147929	0.360258979412483	0.403813987560412	0.39796039986672	0.544710929939839	0.941935352001949	0.111810128054908	0.999805500558022	FALSE
392	PF3D7_0408700.e3s1_8902	-0.102485568363791	0.12057433693048	0.223059905294271	0.618148634529049	0.408702964355442	0.914993401566556	0.0756501710393562	0.999805500558022	FALSE
393	PF3D7_0408700.e5s1_7160	-0.0662936579044616	0.286730247862124	0.353023905766586	0.504963049298322	0.394251845859309	1.07212509100278	0.114106207723071	0.999805500558022	FALSE
394	PF3D7_0408700.e6s1_5713	0.0183611811493964	0.0269267805627624	0.00856559941336599	0.942697291133965	0.282951948664967	0.230613874614383	0.00514220106278925	0.999805500558022	FALSE
395	PF3D7_0408900.1.e3s1_7464	-0.01647405782357	0.122466133009424	0.138940190832994	0.425593637211558	0.180467545666823	0.346526945655843	0.112602191193439	0.999805500558022	FALSE
396	PF3D7_0409200.iso1.exon1.amp1_3910	-0.0253753944707848	0.0183136200095568	0.0436890144803416	0.700207844218705	0.191147577627992	0.227322532412136	0.0372459451137666	0.999805500558022	FALSE
397	PF3D7_0409500.2o2_7867	0.0144759075447089	0.155275917137928	0.140800009593219	0.175276129367154	0.407281962638882	0.154228171107021	0.0605723934259274	0.999805500558022	FALSE
398	PF3D7_0409600.iso1.exon1.amp1_551	0.0450047773443288	-0.0272609452601355	-0.0722657226044642	0.732630399208271	0.594270414452927	0.391664344611267	-0.0209359136882459	0.999805500558022	FALSE
399	PF3D7_0409600.iso1.exon1.amp2_1059	0.0778912182121545	0.0973085379274874	0.0194173197153329	0.917554778181782	0.523518108645971	0.349727794907273	0.00638109365069868	0.999805500558022	FALSE
400	PF3D7_0409900.7o7_7316	-0.0276921492309331	-0.00788166540678823	0.0198104838241449	0.78075875007527	0.279009465476149	0.112014026764456	0.0124270977015073	0.999805500558022	FALSE
401	PF3D7_0410300.1o2_7946	-0.0566533357496846	0.214028422819456	0.270681758569141	0.60869286626964	0.47215836735114	1.08065140087126	0.0787814748779306	0.999805500558022	FALSE
402	PF3D7_0410500.iso1.exon1.amp1_4441	-0.0616384873275663	0.140740565220695	0.202379052548261	0.00310603810912049	0.254172417626003	0.0871740995038757	0.139730919414454	0.999805500558022	FALSE
403	PF3D7_0410800.iso1.exon1.amp2_1340	-0.0957290610117601	0.0750321668854568	0.170761227897217	0.678889530221703	0.652912436007427	0.829083023754138	0.0421781273309327	0.999805500558022	FALSE
404	PF3D7_0410900.1o1_6799	0.0988409618575017	0.0272636167378909	-0.0715773451196108	0.75981368365132	0.450564000669859	0.464703999171363	-0.0263836651274145	0.999805500558022	FALSE
405	PF3D7_0411000.iso1.exon1.amp1_3723	-0.141475258066794	0.0620831591592577	0.203558417226052	0.515645880360576	0.501386516249898	0.61930719254525	0.0657715604201915	0.999805500558022	FALSE
406	PF3D7_0411700.1o1_4939	0.0210490577580317	-0.062583130637514	-0.0836321883955457	0.894274826815853	0.126439220329402	1.32040560777698	-0.0305677941678342	0.999805500558022	FALSE
407	PF3D7_0411900.iso1.exon1.amp1_724	-0.0435254312262732	0.0420883532005437	0.0856137844268169	0.509246447599852	0.154638234017366	0.260083100382538	0.0841217278906433	0.999805500558022	FALSE
408	PF3D7_0411900.iso1.exon2.amp2_seg2_2021	-0.0217439376511887	-0.0202392343313864	0.00150470331980226	0.987163252339118	0.267260964026787	0.173255169035538	0.000970114551892081	0.999805500558022	FALSE
409	PF3D7_0412000.1o1_7937	-0.104233103123266	0.0544373868336013	0.158670489956867	0.539951143888264	0.593777656561074	0.494210074748925	0.0453172724472864	0.999805500558022	FALSE
410	PF3D7_0412400.iso1.exon1.amp1_3330	-0.075227778658764	-0.160304076432298	-0.0850762977735343	0.787388992148019	0.279409468593355	0.653029649410563	-0.0414931312643639	0.999805500558022	FALSE
411	PF3D7_0412400.iso1.exon2.amp2_3106	-0.0562668932779367	0.0750873753425974	0.131354268620534	0.277977413607956	0.209801229086768	0.22766770406403	0.103333778418617	0.999805500558022	FALSE
412	PF3D7_0412700.iso1.exon1.amp1_2752	-0.119574565125796	0.0950877317656978	0.214662296891493	0.145687148229992	0.374115021636326	0.254303119391535	0.0986240252991864	0.999805500558022	FALSE
413	PF3D7_0412700.iso1.exon2.amp2_1081	0.00707481506468312	0.185674622918071	0.178599807853388	0.723367843788882	0.186228347038827	1.04958187955501	0.076042751081976	0.999805500558022	FALSE
414	PF3D7_0412900.iso1.exon1.amp1_435	-0.00190601405512858	0.133652548662385	0.135558562717514	0.545524431665264	0.483505638630141	0.43227210922237	0.0472575589568327	0.999805500558022	FALSE
415	PF3D7_0412900.iso1.exon2.amp2_3385	-0.193164034261755	0.189051190303616	0.38221522456537	0.14466254368882	0.462944170677728	0.465757756171839	0.13750995686555	0.999805500558022	FALSE
416	PF3D7_0413200.iso1.exon1.amp1_2147	-0.0442637452481968	0.0493135859650327	0.0935773312132295	0.389119173611536	0.379865681163756	0.180091794154597	0.0429485854318312	0.999805500558022	FALSE
417	PF3D7_0413300.iso1.exon2.amp1_707	-0.104948236420644	0.0269187491202938	0.131866985540938	0.270066361922181	0.286806472088514	0.217008695853564	0.0785169387418627	0.999805500558022	FALSE
418	PF3D7_0414000.e2s1_8062	-0.041017191082335	0.0968739917401731	0.137891182822508	0.163745609942536	0.190358259219439	0.177058340067456	0.121644319780708	0.999805500558022	FALSE
419	PF3D7_0414700.1o1_7337	-0.0506654800617099	0.0017940056814659	0.0524594857431758	0.827948210060696	0.291842029388554	0.496014432242903	0.0272370105465299	0.999805500558022	FALSE
420	PF3D7_0414900.e4s1_5677	-0.024726942327001	0.00219327058550292	0.0269202129125039	0.929919437500679	0.273423550457535	0.63631687356232	0.0134400777407715	0.999805500558022	FALSE
421	PF3D7_0415000.1o1_7877	-0.0668544897611327	0.117698862632139	0.184553352393272	0.0963925420072895	0.336838205348068	0.179775157068874	0.0951761790513994	0.999805500558022	FALSE
422	PF3D7_0415100.iso1.exon1.amp1_2166	-0.0622660449741391	0.0578336349001997	0.120099679874339	0.328667432532447	0.3734418893722	0.214131197171671	0.0557183132595937	0.999805500558022	FALSE
423	PF3D7_0415300.iso1.exon1.amp1_4554	-0.0750114403386415	0.0631012591400072	0.138112699478649	0.689826016541448	0.271928173877708	0.713828574237275	0.0658094299980883	0.999805500558022	FALSE
424	PF3D7_0415300.iso1.exon1.amp2_3693	-0.0959321497512801	0.0951783436320092	0.191110493383289	0.63663471493873	0.281375260296665	0.832248283248889	0.082981363178601	0.999805500558022	FALSE
425	PF3D7_0415400.1o1_6387	-0.0551377138924337	0.0202562609656095	0.0753939748580432	0.427310922233188	0.204173959879014	0.180520247497314	0.0623040823526749	0.999805500558022	FALSE
426	PF3D7_0416300.iso1.exon1.amp2_462	-0.074103371874308	0.189798162912772	0.26390153478708	0.499556131055057	0.179490022316872	0.793907765685068	0.14002314929028	0.999805500558022	FALSE
427	PF3D7_0416400.iso1.exon2.amp1_1080	-0.01835990707935	0.125631882618049	0.143991789697399	0.446288742820009	0.489685352028079	0.349230496136895	0.0504035535904772	0.999805500558022	FALSE
428	PF3D7_0416400.iso1.exon2.amp2_3664	-0.0439990757382004	0.214252285492628	0.258251361230829	0.138730648140471	0.331309550842497	0.307819835673831	0.130912982834346	0.999805500558022	FALSE
429	PF3D7_0416600.1o1_5263	-0.0264357701422045	0.0482387256073313	0.0746744957495358	0.897801868080679	0.152259570842059	1.21955670385907	0.0288683911931419	0.999805500558022	FALSE
430	PF3D7_0416900.iso1.exon2.amp2_seg1_2886	-0.0442530625902837	0.128585410658569	0.172838473248853	0.371930161218108	0.188234865245334	0.381042310915939	0.131995133054126	0.999805500558022	FALSE
431	PF3D7_0417100.1o4_5878	-0.0841899977702721	-0.0666837513217374	0.0175062464485347	0.975581139871208	0.468007557755105	1.19149657587488	0.00491476130870529	0.999805500558022	FALSE
432	PF3D7_0417400.iso1.exon1.amp4_seg2_2328	-0.17105304948121	0.0828974510946175	0.253950500575827	0.386302191961797	0.561296965786052	0.560545690481083	0.0754170745735915	0.999805500558022	FALSE
433	PF3D7_0417400.iso1.exon1.amp6_seg1_1730	-0.00636875369859056	0.21976097151034	0.22612972520893	0.237444883738218	0.314609477305742	0.356368990705133	0.11795317634341	0.999805500558022	FALSE
434	PF3D7_0418000.6o10_5641	0.0542968932943218	0.0920776738986937	0.037780780604372	0.86900563401246	0.527078314082333	0.445296075166055	0.0121412438347323	0.999805500558022	FALSE
435	PF3D7_0418000.7o10_5069	-0.0218051896853249	0.0488902225521318	0.0706954122374568	0.506687279936665	0.314433197900742	0.191330679901727	0.0388564610705288	0.999805500558022	FALSE
436	PF3D7_0418800.iso1.exon4.amp1_2929	-0.0742689113323397	-0.0706196053774413	0.00364930595489842	0.950228166618305	0.270638115607333	0.0750660424854813	0.00237229173604809	0.999805500558022	FALSE
437	PF3D7_0419100.iso1.exon1.amp1_2401	-0.00535776038478587	0.0772555974492111	0.0826133578339969	0.430091344998365	0.342751569330521	0.179821224371852	0.0418938561794439	0.999805500558022	FALSE
438	PF3D7_0419200.1o1_6384	-0.0890950521300311	0.0113059591773691	0.1004010113074	0.316361715314518	0.37261358316494	0.158723247529702	0.0471014410156884	0.999805500558022	FALSE
439	PF3D7_0419300.iso1.exon1.amp1_2162	-0.0799633111725896	0.0117810719899616	0.0917443831625512	0.0991422629783126	0.221295558956165	0.0795210144975604	0.0727034175103803	0.999805500558022	FALSE
440	PF3D7_0419400.2o4_8826	-0.0627413002766638	0.0317836485302415	0.0945249488069053	0.336936182275477	0.334294593629905	0.164379231836603	0.0492466140593682	0.999805500558022	FALSE
441	PF3D7_0419400.3o4_9115	-0.0226705540260418	0.215587541272694	0.238258095298736	0.0800305843474337	0.277911380238036	0.228528149531755	0.145528110192244	0.999805500558022	FALSE
442	PF3D7_0419400.4o4_8537	-0.059986582961931	-0.166372687079296	-0.106386104117365	0.635992983714656	0.326465895775005	0.452752281235324	-0.0517236498352153	0.999805500558022	FALSE
443	PF3D7_0419500.1o1_5301	0.011972556422803	-0.0319047499714561	-0.0438773063942591	0.5781023230364	0.198028088703043	0.148680343640785	-0.0378575290359727	0.999805500558022	FALSE
444	PF3D7_0419700.1o1_8146	-0.151887099391873	-0.0236456459168821	0.128241453474991	0.501140843214962	0.417840498153899	0.364894001471399	0.051840685243782	0.999805500558022	FALSE
445	PF3D7_0419900.iso1.exon3.amp1_2826	-0.0662920253742965	-0.0557857368694595	0.010506288504837	0.974934729056417	0.565202302087527	0.675700724591514	0.0030267557832517	0.999805500558022	FALSE
446	PF3D7_0419900.iso1.exon3.amp5_seg1_2006	-0.0261551527976983	-0.0334490674742597	-0.00729391467656139	0.98612769506554	0.19317800747663	0.879279305365555	-0.00352289199077415	0.999805500558022	FALSE
447	PF3D7_0420000.s2_5994	0.00871383666706627	0.158924743270178	0.150210906603112	0.495823367862797	0.274978523269595	0.440678304693095	0.0840175716976814	0.999805500558022	FALSE
448	PF3D7_0420300.iso1.exon1.amp1_521	-0.0964535162155178	0.100063246356865	0.196516762572383	0.138834624838786	0.470210884409252	0.207559996550136	0.072997234082628	0.999805500558022	FALSE
449	PF3D7_0420300.iso1.exon1.amp3_1099	-0.0601367153769766	0.117610288998219	0.177747004375196	0.242816691186107	0.577158611752429	0.235028722532756	0.0538861387210128	0.999805500558022	FALSE
450	PF3D7_0420300.iso1.exon1.amp4_seg1_3445	-0.15562511403489	0.188991059196967	0.344616173231857	0.365139941914429	0.603754194717848	0.735008993285578	0.0926817471038349	0.999805500558022	FALSE
451	PF3D7_0420600.iso1.exon1.amp1_2477	0.0568037410878062	-0.0374611903759593	-0.0942649314637655	0.582615521420104	0.337407969183564	0.33558732858322	-0.0465911472495158	0.999805500558022	FALSE
452	PF3D7_0420700.e2s1_8336	-0.0453736310492831	0.25273215301346	0.298105784062743	0.240408724497628	0.250720366222644	0.480513971075213	0.17400337862124	0.999805500558022	FALSE
453	PF3D7_0420900.iso1.exon1.amp1_4190	-0.059372066537723	0.0342242051814711	0.0935962717191942	0.480781177897912	0.377951751058236	0.240555823656377	0.0427091400708503	0.999805500558022	FALSE
454	PF3D7_0421200.iso1.exon2.amp1_3312	-0.105604688132443	0.177974947041007	0.28357963517345	0.329819410018492	0.440853846226293	0.559051002232434	0.103760392798532	0.999805500558022	FALSE
455	PF3D7_0421300.iso1.exon1.amp1_2739	-0.115854432165668	0.172693337647781	0.288547769813449	0.0803080953683744	0.449825401015783	0.26993382569334	0.110927171195112	0.999805500558022	FALSE
456	PF3D7_0421800.iso1.exon1.amp1_1236	-0.0197556442840368	0.0428848428038378	0.0626404870878747	0.452714164945204	0.161033924535189	0.161108988056601	0.0648282056519141	0.999805500558022	FALSE
457	PF3D7_0422000.5o5_7285	-0.0604498110304658	-0.0286964858822664	0.0317533251481994	0.711612522147513	0.383867970264556	0.116487309002506	0.0145394204106062	0.999805500558022	FALSE
458	PF3D7_0422100 (renamed)_7011	-0.126776029562234	0.219550843026014	0.346326872588248	0.553124969293926	0.580957931260023	1.18354201159504	0.0855102678116256	0.999805500558022	FALSE
459	PF3D7_0422200.iso1.exon1.amp4_2550	-0.0528660895519252	0.141933501344342	0.194799590896267	0.466128393908873	0.29901819309128	0.533684742543178	0.0973942225728326	0.999805500558022	FALSE
460	PF3D7_0422300.e3s1_6907	0.00511388165588922	-0.069316306890639	-0.0744301885465282	0.0944873603369865	0.18202046226048	0.06199440572394	-0.0717675043434059	0.999805500558022	FALSE
461	PF3D7_0422400.e2s1_5434	-0.0707399765592359	0.0189700139711412	0.0897099905303772	0.747739228551524	0.288035669041598	0.574128084230737	0.0450051255607028	0.999805500558022	FALSE
462	PF3D7_0422500.e1s2_8254	-0.0868707726223254	0.0942404233815104	0.181111196003836	0.535082687910893	0.363534956716644	0.586436382283315	0.0765015176281096	0.999805500558022	FALSE
463	PF3D7_0422500.e1s3_5652	0.00610921558923733	0.146771661374499	0.140662445785262	0.810106735196597	0.261803555105138	1.22236649067079	0.0492114562451133	0.999805500558022	FALSE
464	PF3D7_0422700.e1s1_4878	-0.0445803014089854	-0.0219562628907507	0.0226240385182346	0.939610495245696	0.329614433614481	0.617360301794873	0.0101165671708421	0.999805500558022	FALSE
465	PF3D7_0423100.iso1.exon1.amp1_3832	-0.105825194047084	0.0669084846934584	0.172733678740543	0.00568865753832676	0.300033314437991	0.0585779155290824	0.101531396886858	0.999805500558022	FALSE
466	PF3D7_0423400.1o1_7833	-0.024992474276394	0.0188205230207451	0.0438129972971392	0.686558671568273	0.387619128185361	0.181837966243401	0.0197119704315448	0.999805500558022	FALSE
467	PF3D7_0423700.1o1_6673	-0.0291684994787796	0.0726514499979764	0.101819949476756	0.587851706465737	0.278110240268144	0.376384722811112	0.0583813130733254	0.999805500558022	FALSE
468	PF3D7_0424200.iso1.exon1.amp2_2772	-0.0887502163810239	0.0155801804699891	0.104330396851013	0.867623281713183	0.448904704002408	1.30435301149511	0.0286576108889148	0.999805500558022	FALSE
469	PF3D7_0424600.e2s1_8623	-0.0912120542969118	0.0630451904797393	0.154257244776651	0.400394941194388	0.349493575304776	0.351827475076851	0.0735075661867754	0.999805500558022	FALSE
470	PF3D7_0424800.2o2_6416	-0.144766368477212	-0.0418000147347357	0.102966353742476	0.570552730882425	0.26341212473417	0.363429773806333	0.0621060098694649	0.999805500558022	FALSE
471	PF3D7_0425100.2o2_8127	-0.0628202114431208	-0.140900385248105	-0.0780801738049838	0.817256627607915	0.28510599807903	0.701090131818091	-0.0365353859761538	0.999805500558022	FALSE
472	PF3D7_0425200.2o2_5531	-0.07742914149547	0.148420637280667	0.225849778776137	0.317915279027447	0.338339088953626	0.433402724093465	0.107492702296218	0.999805500558022	FALSE
473	PF3D7_0425300.1o1_8130	-0.0462878556632237	0.0288265653397353	0.075114421002959	0.260968127809378	0.253007574768577	0.103660410031449	0.0519404302813845	0.999805500558022	FALSE
474	PF3D7_0425500.iso1.exon1.amp1_1565	-0.232475392763221	-0.0716715024577439	0.160803890305477	0.7476381930697	0.540832757636302	1.02725862100291	0.0436344979016052	0.999805500558022	FALSE
475	PF3D7_0425700.iso1.exon1.amp1_4168	-0.12420152501162	-0.00998984973527151	0.114211675276349	0.829865223992356	0.545664519933519	1.0983637968311	0.0301460219487587	0.999805500558022	FALSE
476	PF3D7_0425800.iso1.exon1.amp1_3955	-0.0576876581785678	0.0491661804800994	0.106853838658667	0.733570437149102	0.222898166372094	0.650372480433937	0.058983868369174	0.999805500558022	FALSE
477	PF3D7_0425800.iso1.exon1.amp2_4244	-0.0401848587506332	0.144556347797633	0.184741206548266	0.197350171257091	0.204978794653135	0.264016039766539	0.144997019061869	0.999805500558022	FALSE
478	PF3D7_0425800.iso1.exon2.amp1_4183	0.0199156235268775	0.0643889437033433	0.0444733201764658	0.802495039533024	0.311075038680445	0.356920754640034	0.0234195494341636	0.999805500558022	FALSE
479	PF3D7_0425900.iso1.exon2.amp1_4457	-0.0658395914027495	0.270942279611891	0.336781871014641	0.0304306119150163	0.459340098969064	0.236378817916467	0.127516883059913	0.999805500558022	FALSE
480	PF3D7_0426000.iso1.exon1.amp1_4198	-0.0635635755048248	0.0172684649682068	0.0808320404730316	0.620823034352118	0.205809389928825	0.330991276701572	0.0603550135883816	0.999805500558022	FALSE
481	PF3D7_0500100.iso1.exon1.amp1_2232	-0.046911130794252	0.107724491613075	0.154635622407327	0.484960549472469	0.231782587110893	0.444205630615756	0.0976359533465666	0.999805500558022	FALSE
482	PF3D7_0500100.iso1.exon2.amp1_1299	-0.155449509290483	0.440477201823339	0.595926711113822	0.201958025399391	0.414396503912146	0.86995538076809	0.204131512798625	0.999805500558022	FALSE
483	PF3D7_0500400.iso1.exon1.amp1_3882	-0.198454575672865	0.135165205825777	0.333619781498643	0.513530923547201	0.702171118092398	1.01842395248282	0.0747377326116196	0.999805500558022	FALSE
484	PF3D7_0500500.iso1.exon1.amp1_2721	-0.0990529046887665	0.0369114135455568	0.135964318234323	0.721107057549921	0.480120916248191	0.777309294353341	0.04344694292043	0.999805500558022	FALSE
485	PF3D7_0500800.e1s1_7120	-0.033220372868674	0.0369963245283827	0.0702166973970568	0.435357135244778	0.266477032439871	0.160436910463785	0.0455599214048757	0.999805500558022	FALSE
486	PF3D7_0500800.e2s1_8081	-0.0780126560195733	0.0658226861511846	0.143835342170758	0.848196985395975	0.445602860504487	1.56822145431247	0.0357458272006149	0.999805500558022	FALSE
487	PF3D7_0500900.iso1.exon2.amp1_442	-0.0216293001203109	0.390824773211039	0.412454073331349	0.61910128102153	0.333821235554593	1.71082792882929	0.105536688026664	0.999805500558022	FALSE
488	PF3D7_0501000.e1s1_4842	0.034037327992019	-0.054896837448333	-0.088934165440352	0.125508022089589	0.180504579811702	0.0948800603508343	-0.0856312777956721	0.999805500558022	FALSE
489	PF3D7_0501000.e2s1_5152	-0.0702964175966266	0.00150569599578851	0.0718021135924151	0.745577377264225	0.311265366436304	0.449860894442784	0.0363125610799648	0.999805500558022	FALSE
490	PF3D7_0501100.1.e3s1_7453	-0.0393698540699066	0.00503928629793506	0.0444091403678417	0.912055644316579	0.171439872855157	0.842435787575257	0.0228436386527607	0.999805500558022	FALSE
491	PF3D7_0501100.1.e4s1_6302	-0.0751784928770322	-0.0610028114157181	0.014175681461314	0.894833029993574	0.251790846289453	0.20781677864287	0.00955396989940798	0.999805500558022	FALSE
492	PF3D7_0501100.iso2.exon3.amp1_2407	-0.0544829698667758	0.155138245184199	0.209621215050975	0.712526282664093	0.193527167013872	1.18284463264494	0.0804157893443638	0.999805500558022	FALSE
493	PF3D7_0501200.e2_7703	-0.0347369095954294	0.0437481189540929	0.0784850285495223	0.716381227336296	0.354923944692595	0.434086184585612	0.0358802228218936	0.999805500558022	FALSE
494	PF3D7_0501500.e1s1_8931	-0.102332306442835	0.291492110267591	0.393824416710425	0.374450243744978	0.308295561474574	0.877503590528438	0.159174227161636	0.999805500558022	FALSE
495	PF3D7_0501600.e1s1_8642	-0.103660719930469	0.107649235545795	0.211309955476264	0.517634493951034	0.348052541962876	0.657864618077475	0.0892338907137167	0.999805500558022	FALSE
496	PF3D7_0501800.e1s1_4880	-0.00977982299356553	0.121312294498732	0.131092117492297	0.704702997440869	0.379936902850214	0.708806904762085	0.0509162047640664	0.999805500558022	FALSE
497	PF3D7_0501800.e1s2_6042	0.102062624990972	-0.0502024268222147	-0.152265051813187	0.768506829823222	0.465176269671444	1.06964287682367	-0.0448985810214486	0.999805500558022	FALSE
498	PF3D7_0501900.iso1.exon2.amp1_2980	-0.109154399255802	-0.0613978492266906	0.0477565500291109	0.727140224466799	0.410925432765643	0.248172677813107	0.0200915636786805	0.999805500558022	FALSE
499	PF3D7_0502000.iso1.exon2.amp1_1211	-0.145170882744513	0.0722470088288077	0.21741789157332	0.0277704387832088	0.384529059566292	0.135177370220413	0.0991887406696354	0.999805500558022	FALSE
500	PF3D7_0502200.2o2_5863	-0.0669165880685618	0.168720271268654	0.235636859337216	0.391266833044384	0.283626462016506	0.5425866098315	0.121653028698036	0.999805500558022	FALSE
501	PF3D7_0502400.1o1_5886	-0.17060235905943	0.00502426118396535	0.175626620243396	0.771717856024851	0.667979263320576	1.24505379920526	0.0388093927529799	0.999805500558022	FALSE
502	PF3D7_0502700.iso1.exon2.amp1_3857	-0.0826565237735445	-0.043143939814404	0.0395125839591405	0.910302688423328	0.490819412384169	0.717383935883164	0.012642828033021	0.999805500558022	FALSE
503	PF3D7_0502800.1o1_6679	-0.0434533638955	0.0182596392573835	0.0617130031528835	0.592762340967787	0.252963857318447	0.222858558778723	0.0411752616452451	0.999805500558022	FALSE
504	PF3D7_0503000.5o5_8733	-0.0719604115972285	-0.0404619371700083	0.0314984744272202	0.864021119615934	0.236753648396091	0.377375939280097	0.0204893375299333	0.999805500558022	FALSE
505	PF3D7_0503600.e1s1_5436	-0.0329101390216522	-0.0374251738364812	-0.00451503481482902	0.936800554564241	0.147903545472649	0.108156586828238	-0.00522464977946004	0.999805500558022	FALSE
506	PF3D7_0503600.e7s1_7736	-0.0406340542055644	0.0497996962301475	0.0904337504357119	0.263707849355596	0.249823058338973	0.138445534619486	0.0627976027701277	0.999805500558022	FALSE
507	PF3D7_0503900.2o2_5032	-0.0608526322251922	0.0272055620965261	0.0880581943217183	0.459914401379721	0.427459280999636	0.196148075344785	0.0359466650261251	0.999805500558022	FALSE
508	PF3D7_0504200.2o3_7328	-0.0365050752531052	0.193815135092374	0.230320210345479	0.241171384644411	0.231194351925234	0.370737892201406	0.153199510975034	0.999805500558022	FALSE
509	PF3D7_0504400.iso1.exon1.amp1_2757	-0.0795214970459502	0.107550581794792	0.187072078840742	0.344586853082428	0.343218186670327	0.378443776225622	0.0897722608968173	0.999805500558022	FALSE
510	PF3D7_0504500.5o6_9016	-0.0195722957600817	-0.0562053639194666	-0.0366330681593849	0.946937735540826	0.29699097908915	1.15220925506812	-0.0128455177537138	0.999805500558022	FALSE
511	PF3D7_0504600_5397	-0.0380825424153766	0.163411009259094	0.201493551674471	0.587885701794136	0.344746256386041	0.757761078792112	0.0815823088659808	0.999805500558022	FALSE
512	PF3D7_0504800.iso1.exon1.amp1_1378	-0.0510014684623243	-0.0860519455267294	-0.0350504770644051	0.922945392795958	0.291532500888562	0.754738027459215	-0.0156778151638856	0.999805500558022	FALSE
513	PF3D7_0504800.iso1.exon1.amp2_1667	0.0537441395503832	-0.119096870176096	-0.172841009726479	0.24167612132762	0.491518935740754	0.244444754503831	-0.0612237317126386	0.999805500558022	FALSE
514	PF3D7_0505100.iso1.exon1.amp1_1083	-0.0625527317956485	-0.142498852429912	-0.0799461206342632	0.676713689141355	0.506352129365249	0.359760414487426	-0.0270696501329653	0.999805500558022	FALSE
515	PF3D7_0505100.iso1.exon1.amp2_3685	-0.116799498779661	0.153482956917421	0.270282455697082	0.563350065451793	0.295666569008229	0.955951945095448	0.106400722595544	0.999805500558022	FALSE
516	PF3D7_0505100.iso1.exon2.amp1_507	-0.0815604963826352	0.27107152131855	0.352632017701185	0.42502239983608	0.456280389384177	0.878368604362011	0.112942688853091	0.999805500558022	FALSE
517	PF3D7_0505100.iso1.exon2.amp2_1332	-0.0787429462747703	0.11967099308863	0.198413939363401	0.686931662214287	0.518657468897713	1.00884496606341	0.0557218313920994	0.999805500558022	FALSE
518	PF3D7_0505200.e1s1_6332	-0.0531372638434738	-0.0331383147421594	0.0199989491013144	0.845910275950629	0.477427551653661	0.131454698334991	0.00737015471313594	0.999805500558022	FALSE
519	PF3D7_0505400.1o1_4753	0.0109379062649455	0.0422182653468404	0.0312803590818949	0.866617160773828	0.194222428468818	0.385132376033324	0.0233122637786199	0.999805500558022	FALSE
520	PF3D7_0505500.e1s1_4811	0.0355831022069563	-0.119989702180544	-0.155572804387501	0.611385905332148	0.345129854482124	0.622221239272912	-0.0671953062126145	0.999805500558022	FALSE
521	PF3D7_0505500.e2_6247	-0.13235109516227	0.073407933685262	0.205759028847532	0.440007574877227	0.40242630862048	0.523296144905722	0.0821221100120432	0.999805500558022	FALSE
522	PF3D7_0506200.1o1_7857	-0.0621463898596214	0.0240316249286384	0.0861780147882598	0.584963508641243	0.38824261871839	0.298719408490935	0.0378631019319257	0.999805500558022	FALSE
523	PF3D7_0506300.iso1.exon1.amp1_3900	-0.102992933602781	0.0268162569749219	0.129809190577703	0.770930803833963	0.297377365775643	0.926317084243861	0.0518734087448033	0.999805500558022	FALSE
524	PF3D7_0506800.e1_6284	-0.0236234091509733	-0.155028318747876	-0.131404909596903	0.81222917303592	0.207832272506865	1.15605463209019	-0.0506601522742886	0.999805500558022	FALSE
525	PF3D7_0506900.1o1_6208	-0.033573807150489	0.00254169373633246	0.0361155008868215	0.900255365138296	0.267675193687797	0.598152745542765	0.0187150886846857	0.999805500558022	FALSE
526	PF3D7_0507200.iso1.exon1.amp1_150	-0.0832501014504757	0.125297608457789	0.208547709908265	0.179837666581383	0.367231018582998	0.274771481992682	0.0970517178083356	0.999805500558022	FALSE
527	PF3D7_0507300 (plasmodb revised)_5405	-0.053927607150367	0.147457206261673	0.20138481341204	0.463461736842369	0.332618642986636	0.54681533681562	0.0925347115017637	0.999805500558022	FALSE
528	PF3D7_0507700.e1s1_5454	-0.0607082071925328	0.10593162346584	0.166639830658373	0.397571418430936	0.18440421176167	0.390162038803558	0.127917465805632	0.999805500558022	FALSE
529	PF3D7_0507900.iso1.exon2.amp1_43	-0.106279970769609	0.0176948677338704	0.12397483850348	0.260230381835509	0.295568335780569	0.195370182422673	0.0722027458755502	0.999805500558022	FALSE
530	PF3D7_0508000.1o1_6429	-0.0816732668505221	0.0813340435084527	0.163007310358975	0.167414930143644	0.229838931556221	0.211344653187147	0.11923156922979	0.999805500558022	FALSE
531	PF3D7_0508400.4o4_6424	-0.0161216093962149	0.205552468607594	0.221674078003809	0.242323786422996	0.325618666411381	0.352729391363408	0.11238523678954	0.999805500558022	FALSE
532	PF3D7_0508500.s3_4828	-0.0571871031642566	0.17584890032553	0.233036003489787	0.296478914588436	0.443991246191161	0.417236926672221	0.0880513477896567	0.999805500558022	FALSE
533	PF3D7_0508600.iso1.exon1.amp1_3875	-0.0448561777852968	-0.0185040415110063	0.0263521362742906	0.725498805699031	0.287931059675485	0.119963269550513	0.0160062997835735	0.999805500558022	FALSE
534	PF3D7_0508900.iso1.exon1.amp1_1678	0.00739031989472742	-0.0372867070725064	-0.0446770269672339	0.259940827317368	0.155727838444899	0.0598851723025802	-0.0502534326540363	0.999805500558022	FALSE
535	PF3D7_0508900.iso1.exon1.amp2_1967	0.0297781405669088	0.0856560828428126	0.0558779422759038	0.568309534317936	0.288546980316493	0.177054091986755	0.0334550949468775	0.999805500558022	FALSE
536	PF3D7_0508900.iso1.exon1.amp4_4215	0.0147611357791131	-0.00875207921205181	-0.0235132149911649	0.814434066497637	0.180537310766508	0.200635834744961	-0.0214286851065787	0.999805500558022	FALSE
537	PF3D7_0509000.e5s1_6290	-0.0343266820905944	0.0332495906484073	0.0675762727390017	0.604883557649701	0.314173649775342	0.248709475854	0.0366161485774176	0.999805500558022	FALSE
538	PF3D7_0509100.iso1.exon1.amp1_2855	-0.127146161650452	0.0484712879668393	0.175617449617292	0.841879410756925	0.565957988527404	1.83540424316588	0.036055145606232	0.999805500558022	FALSE
539	PF3D7_0509100.iso1.exon1.amp2_3351	-0.0919696404867835	-0.00454087479983265	0.0874287656869509	0.786012927624128	0.354797135407664	0.662834188856266	0.0363480035824324	0.999805500558022	FALSE
540	PF3D7_0509200.iso1.exon4.amp1_392	-0.0566514409273038	0.0240648805518454	0.0807163214791492	0.419901492780472	0.37507274825196	0.159648057687352	0.0376190683653866	0.999805500558022	FALSE
541	PF3D7_0509500.1o1_6441	-0.0232015365560883	0.134568363234846	0.157769899790934	0.663314115106551	0.194458855935953	0.749098155926396	0.0848832976205689	0.999805500558022	FALSE
542	PF3D7_0509600.2o2_7637	-0.107276326102863	0.0706410392211975	0.17791736532406	0.220527609462217	0.432332589824409	0.248648146373994	0.0712898383285124	0.999805500558022	FALSE
543	PF3D7_0509700.e4s1_9186	0.0246776264907486	0.0314943955646172	0.00681676907386856	0.951239120178518	0.155486538978185	0.228177345015514	0.0068793333974558	0.999805500558022	FALSE
544	PF3D7_0509800.2o4_8246	-0.0534157390903544	0.153135562754686	0.206551301845041	0.490414015879338	0.365760379742292	0.59843934765246	0.0864125530560882	0.999805500558022	FALSE
545	PF3D7_0509900.iso1.exon1.amp1_3597	-0.06847174513376	0.0876499243941986	0.156121669527959	0.257157109017802	0.367961179999676	0.244518175180221	0.0730161761850543	0.999805500558022	FALSE
546	PF3D7_0510100.iso1.exon1.amp2_4582	-0.132163250383046	0.0977461423331128	0.229909392716159	0.0573596952462955	0.493939005723709	0.164887773613306	0.0817155089322323	0.999805500558022	FALSE
547	PF3D7_0510100.iso1.exon1.amp3_1915	-0.18366077126912	-0.000367517780504301	0.183293253488616	0.140574262850692	0.579577580112297	0.147913921908471	0.0556799921190942	0.999805500558022	FALSE
548	PF3D7_0510400.1o1_8464	-0.0648225983246009	-0.0598777482676301	0.00494485005697086	0.987886131238438	0.234805129514136	0.679879617709716	0.002601394347257	0.999805500558022	FALSE
549	PF3D7_0510800.1o1_4938	-0.111015339897417	-0.134651337159453	-0.0236359972620361	0.936178771770757	0.393960913750179	0.605486568288114	-0.00931893751237096	0.999805500558022	FALSE
550	PF3D7_0511100.iso1.exon2.amp1_1537	-0.0937604768894322	-0.0623852438323961	0.031375233057036	0.656133645400912	0.190770784401808	0.131253871880965	0.0282499068391805	0.999805500558022	FALSE
551	PF3D7_0511300.iso1.exon1.amp1_2538	-0.103449632620831	0.062819348563977	0.166268981184808	0.417036338193401	0.517768478752752	0.378868714437573	0.0549582402102024	0.999805500558022	FALSE
552	PF3D7_0511400.1o1_4698	-0.0196586600850387	0.0346305355528912	0.0542891956379299	0.555197679417595	0.209771764339932	0.176084036020177	0.0438593144176128	0.999805500558022	FALSE
553	PF3D7_0511400_8865	-0.0793157140833574	0.115714091061662	0.19502980514502	0.435023906563719	0.351062434812865	0.492075246411353	0.0879943336057012	0.999805500558022	FALSE
554	PF3D7_0511500.s1_7710	0.00689783558994439	0.0370857759614012	0.0301879403714568	0.819828532333546	0.342465400398111	0.251473602344358	0.0150826671231989	0.999805500558022	FALSE
555	PF3D7_0511500.s3_7138	-0.0558606202050543	-0.13344125196826	-0.0775806317632055	0.861823593022607	0.423756495453738	0.923885415983737	-0.0256326861771872	0.999805500558022	FALSE
556	PF3D7_0511500.s4_7427	0.0282779233819376	0.318551239430417	0.290273316048479	0.50939359563568	0.26834423968735	0.893250622903899	0.123819535213953	0.999805500558022	FALSE
557	PF3D7_0511600.1o1_5809	-0.0237931961641758	-0.0209596716053138	0.00283352455886195	0.996887382326366	0.704312739887522	1.50780092380872	0.000567071807500803	0.999805500558022	FALSE
558	PF3D7_0512100.iso1.exon2.amp1_3546	-0.0754572525605581	0.103375132295025	0.178832384855583	0.183493000364436	0.30340920708283	0.239259588617064	0.10036616867738	0.999805500558022	FALSE
559	PF3D7_0512600.e6s1_7173	-0.0275628662048681	-0.0390091670211945	-0.0114463008163263	0.953621492819306	0.146863903685678	0.41055985235966	-0.00979911864315484	0.999805500558022	FALSE
560	PF3D7_0512900.iso1.exon1.amp1_3002	-0.0102121650595304	0.148854605853555	0.159066770913085	0.0130051668564674	0.209666966649862	0.0909477833364017	0.132564223564109	0.999805500558022	FALSE
561	PF3D7_0513000.e1s1_5733	-0.0202864947633931	0.0425956654994305	0.0628821602628236	0.503258795372203	0.296531633300367	0.16491484335522	0.0367827550035549	0.999805500558022	FALSE
562	PF3D7_0513100.2o3_7569	-0.0633347556894011	0.0896844551327039	0.153019210822105	0.755350207658415	0.367149579122048	1.01797845697851	0.0526131850692648	0.999805500558022	FALSE
563	PF3D7_0513200.e2s3_5488	0.0161615539064312	0.0370396671055328	0.0208781131991016	0.833260974630413	0.466943670334003	0.123043202277141	0.00787000778759059	0.999805500558022	FALSE
564	PF3D7_0513300.e1s1_8334	-0.0659536376684196	0.0196254531111585	0.085579090779578	0.420078965024977	0.300356110800451	0.191304158705196	0.0491377153568454	0.999805500558022	FALSE
565	PF3D7_0513400.iso1.exon2.amp1_92	-0.106715643732255	-0.00574371519925947	0.100971928532996	0.336394451129476	0.323197376212829	0.182378451217113	0.0541604414349972	0.999805500558022	FALSE
566	PF3D7_0513700.e3s1_8904	-0.0525098718156914	0.0412540522127756	0.093763924028467	0.277579959709436	0.263309027017689	0.148793858928879	0.0617299432413585	0.999805500558022	FALSE
567	PF3D7_0514000.iso1.exon2.amp1_129	0.0600905779022286	-0.00852512698726926	-0.0686157048894979	0.548508849819593	0.28254240050302	0.215642620484731	-0.0414479249484844	0.999805500558022	FALSE
568	PF3D7_0514100.iso1.exon1.amp2_3648	-0.0673492917344172	0.0953036155457379	0.162652907280155	0.231969995911576	0.244022816955966	0.251577406031592	0.110705294449558	0.999805500558022	FALSE
569	PF3D7_0514600.iso1.exon2.amp1_2392	-0.0649491123787716	0.0919111458403215	0.156860258219093	0.015761637649039	0.321932100266124	0.0580539583074194	0.0859592802606099	0.999805500558022	FALSE
570	PF3D7_0514900.1o1_8458	-0.0546272541952889	-0.00859401953722632	0.0460332346580626	0.466683960439336	0.196252073756991	0.111338684984648	0.0406552938723601	0.999805500558022	FALSE
571	PF3D7_0516000.iso1.exon1.amp1_2533	-0.00121204597283347	0.0807831852581476	0.0819952312309811	0.741875803457697	0.200445469287151	0.515048232932185	0.053524164835736	0.999805500558022	FALSE
572	PF3D7_0516400.1o1_9029	-0.122447293715382	-0.0566478464079502	0.0657994473074323	0.838375534904634	0.547416716657956	0.650065435552293	0.0195918283806231	0.999805500558022	FALSE
573	PF3D7_0516500.5o6_7013	-0.0225692012541958	0.0126011211462288	0.0351703224004246	0.602263889186044	0.319505757841999	0.0821941599959828	0.0193791051521092	0.999805500558022	FALSE
574	PF3D7_0516600.s1_6862	0.0536290629480925	0.0459558393172543	-0.00767322363083825	0.965422174144236	0.303628844300652	0.357213571567836	-0.00412485175037032	0.999805500558022	FALSE
575	PF3D7_0516600.s2_5122	-0.00320715865891868	-0.0583814803923801	-0.0551743217334614	0.903367947808865	0.254676909247267	0.950339383393474	-0.0231341208172117	0.999805500558022	FALSE
576	PF3D7_0516800.iso1.exon1.amp2_530	-0.0871637496641705	-0.0565939990576947	0.0305697506064758	0.819759446687318	0.339227528528686	0.255779957476472	0.0153928038509614	0.999805500558022	FALSE
577	PF3D7_0516800.iso1.exon1.amp3_1048	0.0143524343679223	-0.0216732698972795	-0.0360257042652018	0.670287232012047	0.249761198054342	0.153885697902987	-0.0249141118245233	0.999805500558022	FALSE
578	PF3D7_0517600.1o1_7287	-0.144835285411351	-0.0523934338044416	0.092441851606909	0.754238161919453	0.404386911738641	0.601429296919393	0.0357673895645134	0.999805500558022	FALSE
579	PF3D7_0517700_5368	-0.00985538519177451	0.0361054862168565	0.045960871408631	0.503245210413034	0.308406965600547	0.0915334568625406	0.0262005963021252	0.999805500558022	FALSE
580	PF3D7_0517900.2o2_7334	-0.0656516989073841	0.125502056796531	0.191153755703915	0.692668102559446	0.322789768370322	0.999995973406054	0.0705842660127076	0.999805500558022	FALSE
581	PF3D7_0518400.iso1.exon1.amp1_4147	-0.0656378845955364	0.0867346471606293	0.152372531756166	0.156342911335927	0.226142985935642	0.190230993387636	0.114167892915713	0.999805500558022	FALSE
582	PF3D7_0518600.iso1.exon1.amp1_1407	-0.0244964102874241	0.103902080454076	0.1283984907415	0.753044578846872	0.666218881956555	0.822046323221765	0.0312275119188831	0.999805500558022	FALSE
583	PF3D7_0518600.iso1.exon1.amp2_1924	-0.00760294238058586	0.0423118292463354	0.0499147716269212	0.915396409830345	0.294199515519017	0.981770927945745	0.019392306268279	0.999805500558022	FALSE
584	PF3D7_0518700.e1s1_5478	-0.062680833619654	-0.010609158317137	0.052071675302517	0.830241220260461	0.302737466843134	0.49851887830802	0.0262771067047749	0.999805500558022	FALSE
585	PF3D7_0518700.e3s1_8039	-0.011487177085926	0.0360054118559241	0.0474925889418501	0.57357833080017	0.240530301408513	0.154149082656157	0.0340415677392573	0.999805500558022	FALSE
586	PF3D7_0518800.iso1.exon7.amp1_2109	-0.0962136310299132	-0.000968560768932747	0.0952450702609805	0.863227755449848	0.357693831272502	1.15343848203598	0.0310392477028929	0.999805500558022	FALSE
587	PF3D7_0518900.iso1.exon1.amp1_2982	-0.0754669079191147	0.0304179475175907	0.105884855436705	0.270958087164275	0.284504051072843	0.167018891479543	0.0644186813132969	0.999805500558022	FALSE
588	PF3D7_0519000.iso1.exon1.amp1_4167	-0.0265971175787169	0.0392465974870316	0.0658437150657485	0.480431500489618	0.189581465412489	0.179897161610167	0.058207991112777	0.999805500558022	FALSE
589	PF3D7_0519100.iso1.exon1.amp1_673	-0.00554607682475474	0.0338478818189063	0.0393939586436611	0.777428114630633	0.15478012569908	0.286657826551588	0.0376409741123171	0.999805500558022	FALSE
590	PF3D7_0519200.e2s1_5387	-0.0827771785373628	-0.0136085493413983	0.0691686291959645	0.413247046601757	0.395732384153851	0.104133168384137	0.0307653024070703	0.999805500558022	FALSE
591	PF3D7_0519300.1o1_9072	4.66507456098802e-05	-0.013819148772405	-0.0138657995180149	0.939895383947976	0.193182419831659	0.380758081016338	-0.0104100375748686	0.999805500558022	FALSE
592	PF3D7_0519900.1o1_7902	-0.0327443732962322	-0.0405154584432662	-0.00777108514703399	0.978792813794128	0.440911990570774	0.595724754161198	-0.00281139526209868	0.999805500558022	FALSE
593	PF3D7_0520000.e3s1_9191	-0.0242197386664591	0.0458181595732125	0.0700378982396716	0.727283339096192	0.267777632780059	0.408974087348081	0.0406840047241639	0.999805500558022	FALSE
594	PF3D7_0520100.e1s1_8338	-0.05218573297367	-0.0129822976238607	0.0392034353498093	0.913894491041991	0.368673124435473	0.75111878171854	0.0152528075624171	0.999805500558022	FALSE
595	PF3D7_0520400.e1s1_6896	-0.0362042390375227	0.0658458611113332	0.102050100148856	0.551714026992465	0.271116046819985	0.340808463086319	0.0608052493476737	0.999805500558022	FALSE
596	PF3D7_0521200.iso1.exon1.amp1_717	-0.0892695120253338	0.148870850956234	0.238140362981567	0.39738402274373	0.375788876865386	0.551717402462992	0.0994280003010809	0.999805500558022	FALSE
597	PF3D7_0521300.iso1.exon3.amp1_2837	-0.00616341212168143	0.0329719598341413	0.0391353719558227	0.831505956180628	0.408611280189237	0.35922961071623	0.0161680453347989	0.999805500558022	FALSE
598	PF3D7_0521300.iso1.exon3.amp2_seg2_577	-0.0524577374960427	-0.112249244369742	-0.0597915068736994	0.763194347844877	0.247189617381787	0.406171981168935	-0.0369732758045976	0.999805500558022	FALSE
599	PF3D7_0521400.1o1_8497	0.0133112379747271	-0.151535086590958	-0.164846324565685	0.678274772591914	0.509877689087195	0.808091099055272	-0.0498590836644713	0.999805500558022	FALSE
600	PF3D7_0521600.iso1.exon1.amp1_1810	-0.0971178081348157	0.055797805493382	0.152915613628198	0.859139949551054	0.458567120487949	1.80051433339687	0.0344554098968573	0.999805500558022	FALSE
601	PF3D7_0521700.e1s1_9110	-0.00961740738693022	-0.138818764908629	-0.129201357521699	0.441892408798614	0.21897191012769	0.332386279175344	-0.0919057626433007	0.999805500558022	FALSE
602	PF3D7_0521800.iso1.exon1.amp1_1519	-0.125785176272468	-0.0631526078342095	0.0626325684382582	0.587707103494943	0.314216635203329	0.213937626750586	0.0342581761814574	0.999805500558022	FALSE
603	PF3D7_0522400.e3s3_9155	-0.0272309691294934	0.0623957054845686	0.089626674614062	0.747164061749954	0.345898223261019	0.568558449290058	0.0396032195756306	0.999805500558022	FALSE
604	PF3D7_0522400.e4s2_8874	-0.0366778036258	-0.030716580451298	0.00596122317450196	0.987639274177771	0.346157468081418	0.800158506787591	0.00235722500264639	0.999805500558022	FALSE
605	PF3D7_0522400.e4s3_7140	-0.0253164485877661	0.503386196473295	0.528702645061061	0.23380102030585	0.312007225828299	0.841004856064281	0.216850683890448	0.999805500558022	FALSE
606	PF3D7_0522500.iso1.exon1.amp1_2655	-0.0523425991608109	0.047694319080097	0.100036918240908	0.32924021437709	0.26201250465809	0.18650004909325	0.0654528911137019	0.999805500558022	FALSE
607	PF3D7_0523100.e2s1_7775	-0.0522271467071863	0.0974362533164648	0.149663400023651	0.125781881786874	0.224405973115825	0.168751195404256	0.113939705886556	0.999805500558022	FALSE
608	PF3D7_0523400.3o3_6752	0.0464015311318664	0.0618092822014315	0.0154077510695652	0.887151499245898	0.269257938462149	0.208180779454877	0.0097577003727073	0.999805500558022	FALSE
609	PF3D7_0523800.1o1_7352	-0.128502260144105	-0.0162255465316285	0.112276713612477	0.341535174987886	0.583085591260603	0.126632346329849	0.0339395374789256	0.999805500558022	FALSE
610	PF3D7_0524100.iso1.exon1.amp1_509	-0.0305768442875647	0.0819303255917834	0.112507169879348	0.207389406049732	0.319176628881925	0.141700238603364	0.0615586512840538	0.999805500558022	FALSE
611	PF3D7_0524100.iso1.exon1.amp2_798	-0.0178289634290459	0.0288375610416573	0.0466665244707032	0.914880165381136	0.260595870946296	0.912714159410902	0.0198890648155333	0.999805500558022	FALSE
612	PF3D7_0524200.iso1.exon1.amp1_3223	-0.0484293991658012	-0.0843361046936472	-0.035906705527846	0.574950261346992	0.310826461896265	0.0734554590328458	-0.0203503523010161	0.999805500558022	FALSE
613	PF3D7_0524300.1o1_8762	-0.0693952531982284	0.124749140330331	0.19414439352856	0.369467399920459	0.227931401930712	0.424842134639489	0.125727620351498	0.999805500558022	FALSE
614	PF3D7_0524400.e1s1_7190	-0.0662001414040868	0.214095619499734	0.280295760903821	0.583240246752366	0.28664425260143	1.04758671817729	0.105798131727092	0.999805500558022	FALSE
615	PF3D7_0524500.1o1_5233	-0.107467920302157	-0.0724362590851303	0.0350316612170268	0.872064652043976	0.597835621182049	0.407007750066059	0.0100710364289943	0.999805500558022	FALSE
616	PF3D7_0524700.1o1_6961	-0.040868218037585	0.0041147182082323	0.0449829362458173	0.670592556343639	0.265743303242492	0.200570677704015	0.0289117155675573	0.999805500558022	FALSE
617	PF3D7_0524700_8580	-0.13438008370457	0.085837721004955	0.220217804709525	0.147109048910696	0.317151378362367	0.267661356492828	0.117622507395112	0.999805500558022	FALSE
618	PF3D7_0524800.iso1.exon1.amp1_2188	-0.0735120084655034	0.264282005802684	0.337794014268188	0.563887868317516	0.371637366611063	1.19640512108963	0.106052681518948	0.999805500558022	FALSE
619	PF3D7_0525000.1o1_7931	-0.11639290548306	0.134778215519311	0.251171121002371	0.366894168355526	0.513721000904154	0.532122671558206	0.0811593866203656	0.999805500558022	FALSE
620	PF3D7_0525100.e1s1_4897	-0.0467329211430157	0.0217275645258994	0.068460485668915	0.871257076337883	0.257595111147794	0.882020511778122	0.0299207851937021	0.999805500558022	FALSE
621	PF3D7_0525200.iso1.exon1.amp2_3987	-0.0444032177552558	0.037117390226566	0.0815206079818218	0.302634707494528	0.30252287322176	0.122632916217209	0.0471540625882288	0.999805500558022	FALSE
622	PF3D7_0525300.1o1_6447	-0.111898669286401	-0.104177866072848	0.00772080321355308	0.981701194668931	0.557085791615246	0.681411205238655	0.00224872673117442	0.999805500558022	FALSE
623	PF3D7_0525800.e1s1_6607	-0.00530567269768293	0.111795843719511	0.117101516417194	0.485772718913391	0.241205286608777	0.333101744307321	0.0771208455745724	0.999805500558022	FALSE
624	PF3D7_0526200.iso2.exon7.amp1_2452	-0.00554952359343805	0.0900870390677561	0.0956365626611941	0.663296867099316	0.402579922539635	0.435772138177067	0.0392208535859961	0.999805500558022	FALSE
625	PF3D7_0526600.iso1.exon1.amp4_3706	-0.0670425095514501	0.0399184710959837	0.106960980647434	0.202760847722897	0.353808393875974	0.117484288932093	0.0530774223295418	0.999805500558022	FALSE
626	PF3D7_0526900.iso1.exon3.amp1_1800	-0.0316572386020396	0.00721840436843877	0.0388756429704784	0.909456223210392	0.271185452932863	0.711967810978672	0.0185735454153494	0.999805500558022	FALSE
627	PF3D7_0527200.e2s1_8350	-0.0319591294722568	0.0546509564423346	0.0866100859145914	0.862767950763955	0.563835396358431	1.03355755083684	0.0227873182850226	0.999805500558022	FALSE
628	PF3D7_0527600.6o10_4989	-0.000957937141656911	-0.204102808379871	-0.203144871238214	0.0268244478451404	0.320078505740419	0.132550354584049	-0.111011667015302	0.999805500558022	FALSE
629	PF3D7_0528200.e2s1_7765	-0.0612988090816342	-0.0833907914127664	-0.0220919823311322	0.969085253361827	0.272605939117685	1.19444650572453	-0.00776959704369917	0.999805500558022	FALSE
630	PF3D7_0528300.1o1_5292	-0.0347421400443105	-0.0865104145197769	-0.0517682744754664	0.756640563244516	0.254754009898048	0.338169618228657	-0.0325193120156262	0.999805500558022	FALSE
631	PF3D7_0528400.4o8_8756	-0.132785355614216	0.0795567778385067	0.212342133452722	0.603428446679483	0.334395668610924	0.836340075416066	0.0840926715329159	0.999805500558022	FALSE
632	PF3D7_0528500.iso1.exon5.amp1_2948	-0.112907313089807	-0.0810365636929415	0.031870749396866	0.578069383562076	0.294890907653887	0.0541209302527808	0.0190652962673067	0.999805500558022	FALSE
633	PF3D7_0529000.1o1_7059	-0.00495713023085475	0.119417513685057	0.124374643915912	0.831065157151808	0.293840064551667	1.2175443614335	0.0421848965657512	0.999805500558022	FALSE
634	PF3D7_0529400.1.e2s1_8277	-0.0644698029712415	-0.0371593868494884	0.0273104161217531	0.732847169019875	0.331591852568752	0.119384868966267	0.0144430593988487	0.999805500558022	FALSE
635	PF3D7_0529400.1.e5s1_7458	-0.111948062392713	0.0312635067554545	0.143211569148168	0.61303034450859	0.29074025896463	0.57711531392016	0.0712750773874683	0.999805500558022	FALSE
636	PF3D7_0529400.1.e7s1_6001	-0.000655732680225949	0.10958248003397	0.110238212714195	0.72713359844233	0.228643135144644	0.654083414342527	0.0599245844284046	0.999805500558022	FALSE
637	PF3D7_0529700.iso1.exon2.amp1_3636	-0.0563951161456666	0.124708350325908	0.181103466471574	0.269358413068128	0.284677219171218	0.307485630356495	0.105060266139014	0.999805500558022	FALSE
638	PF3D7_0530100.2o2_9005	-0.100625177757183	0.198115742409865	0.298740920167049	0.547337308414801	0.507945107561137	1.00481407817888	0.0851986602843622	0.999805500558022	FALSE
639	PF3D7_0530900.iso1.exon1.amp1_818	-0.0750769693109814	0.146996463446796	0.222073432757777	0.380758102735306	0.343548707681829	0.494815379897834	0.101827931343832	0.999805500558022	FALSE
640	PF3D7_0530900.iso1.exon1.amp2_1107	-0.0287682891510787	-0.0240175782865226	0.00475071086455615	0.987650770419634	0.185484161274	0.642046686447858	0.00286487199199466	0.999805500558022	FALSE
641	PF3D7_0530900.iso1.exon1.amp3_3077	0.0099120891221583	0.0362955254985469	0.0263834363763886	0.92553597540921	0.187183295068471	0.589578716747613	0.0166477224338713	0.999805500558022	FALSE
642	PF3D7_0531100.iso1.exon1.amp2_seg2_3774	-0.0402940162478896	0.00818526531211923	0.0484792815600088	0.584033610257306	0.266199912338101	0.159209693429451	0.0314974062005238	0.999805500558022	FALSE
643	PF3D7_0531400.iso1.exon1.amp2_1631	-0.0128700356566067	0.00522844958963269	0.0180984852462394	0.967485345368619	0.271521342644381	0.928572740802137	0.00750971116623592	0.999805500558022	FALSE
644	PF3D7_0532100_6557	-0.0366997782725973	0.0642953253518616	0.100995103624459	0.637723849347356	0.307747370293409	0.432379675622644	0.0519567307195271	0.999805500558022	FALSE
645	PF3D7_0532300.e2s1_9209	-0.0295074957139801	0.0954606168563082	0.124968112570288	0.542801493843018	0.323230472580064	0.407883743448932	0.0624156657304495	0.999805500558022	FALSE
646	PF3D7_0532400.e1s1_5131	0.0304377579954964	-0.00526780677178813	-0.0357055647672845	0.93643747526163	0.367483519436232	0.932366389692564	-0.0127857571185312	0.999805500558022	FALSE
647	PF3D7_0532400.e2s1_5163	-0.0458347153038244	0.0737265443046404	0.119561259608465	0.725549455508776	0.178001667273314	0.707324701300283	0.0688552003016184	0.999805500558022	FALSE
648	PF3D7_0533100.iso1.exon1.amp1_3129	-0.0710543199259058	0.163455461362609	0.234509781288515	0.136815135029064	0.225103553705903	0.280606748660135	0.168522379085388	0.999805500558022	FALSE
649	PF3D7_0533100.iso1.exon1.amp2_3418	-0.0705247139145196	0.153066752981878	0.223591466896398	0.120665066795624	0.213438691219582	0.253221812895818	0.170771111003866	0.999805500558022	FALSE
650	PF3D7_0533100.iso1.exon1.amp3_1389	-0.0620971339191963	0.0191416044615853	0.0812387383807816	0.608211176944871	0.137517581337485	0.324061061287721	0.0802334132948815	0.999805500558022	FALSE
651	PF3D7_0600200.iso1.exon1.amp3_1938	-0.0523560383959255	0.0451804576886442	0.0975364960845697	0.550353555080433	0.339089982787524	0.316513627350091	0.0482868850081805	0.999805500558022	FALSE
652	PF3D7_0600300.iso1.exon1.amp1_1286	-0.164878188276354	-0.00407161734893471	0.160806570927419	0.669717336451473	0.565689870092929	0.759924972930067	0.0453920832558071	0.999805500558022	FALSE
653	PF3D7_0600400.iso1.exon1.amp1_3033	0.0184665998489798	-0.00213916953127331	-0.0206057693802531	0.939909373968256	0.415420276659807	0.556569391899096	-0.00792444833068192	0.999805500558022	FALSE
654	PF3D7_0600400.iso1.exon2.amp1_1895	-0.0286292361642145	0.0356377228065433	0.0642669589707578	0.627648644580056	0.145017463047012	0.269912512371435	0.0654433015311276	0.999805500558022	FALSE
655	PF3D7_0600500.iso1.exon2.amp1_130	-0.122918699172925	0.125512181558838	0.248430880731763	0.437287867894077	0.44854032858379	0.630205572570048	0.0876875600659424	0.999805500558022	FALSE
656	PF3D7_0600700.iso1.exon1.amp1_4469	-0.189942089458336	0.0641307887872657	0.254072878245602	0.531772489745967	0.549493853913139	0.812864778357009	0.0724292808228047	0.999805500558022	FALSE
657	PF3D7_0601000.iso1.exon1.amp1_3293	-0.042405540328797	0.105657058379992	0.148062598708789	0.77859825496177	0.26115601539547	1.09743423938203	0.0559626959016915	0.999805500558022	FALSE
658	PF3D7_0601200.iso1.exon2.amp1_695	-0.120377143067751	0.110672800947451	0.231049944015202	0.649766827992625	0.592024321980189	1.03639811125491	0.0586635604585646	0.999805500558022	FALSE
659	PF3D7_0601500.iso1.exon1.amp1_4480	-0.0390959127281422	0.123137802545203	0.162233715273345	0.194290620771239	0.183995044122083	0.229724761194266	0.142594327011387	0.999805500558022	FALSE
660	PF3D7_0601700.2o2_6415	0.0375044117262536	-0.000411315986713845	-0.0379157277129674	0.688140060284029	0.396747175549388	0.138740663027321	-0.0167662676277548	0.999805500558022	FALSE
661	PF3D7_0602000.iso1.exon1.amp2_4515	-0.121646431135309	-0.0425236256385961	0.0791228054967129	0.711612086513084	0.48714570544182	0.414326581239686	0.027496052780295	0.999805500558022	FALSE
662	PF3D7_0602100.iso1.exon1.amp1_1671	-0.131192164877624	-0.0521608231908239	0.0790313416868002	0.810768564002993	0.431616916580995	0.675547822160834	0.0283216604233472	0.999805500558022	FALSE
663	PF3D7_0602100.iso1.exon1.amp2_1960	-0.0852046287415195	0.173547297652088	0.258751926393607	0.365124160014796	0.34178094423811	0.558644585186003	0.115875193723566	0.999805500558022	FALSE
664	PF3D7_0602200.1o3_6695	-0.0245723035046855	-0.0659785248699219	-0.0414062213652364	0.950163705741819	0.153747144807862	1.39111332769941	-0.014204550620178	0.999805500558022	FALSE
665	PF3D7_0602600.iso1.exon3.amp1_4131	0.0203962187129018	0.0623484456126381	0.0419522268997362	0.853574605883083	0.634479143987837	0.423309720175346	0.0113763943160087	0.999805500558022	FALSE
666	PF3D7_0602600.iso1.exon4.amp1_377	-0.0882855809414093	-0.00023934601668536	0.0880462349247239	0.298830796404097	0.186427388727099	0.156770833451848	0.0800263634123804	0.999805500558022	FALSE
667	PF3D7_0602700.iso1.exon1.amp1_1591	-0.0239636366906338	0.130965502426471	0.154929139117105	0.828233135247827	0.245553606262384	1.49371855758556	0.0470254304984336	0.999805500558022	FALSE
668	PF3D7_0603100.1o1_7881	-0.0493875935369599	0.0552584405967277	0.104646034133688	0.650627333268412	0.200377294954743	0.474329647504137	0.0707975264832876	0.999805500558022	FALSE
669	PF3D7_0603300.iso1.exon1.amp1_2181	-0.0140803578501954	0.0147214964550265	0.0288018543052219	0.912368261886255	0.332672685984811	0.537876005313979	0.0132871168410862	0.999805500558022	FALSE
670	PF3D7_0603800.16o20_7091	0.106048391428121	0.142238930853281	0.0361905394251598	0.776004147434282	0.396238667954994	0.228000546680283	0.0158218423966857	0.999805500558022	FALSE
671	PF3D7_0604000.iso1.exon1.amp1_1983	-0.063686212396466	0.232176697626869	0.295862910023335	0.685735635236248	0.435346756144421	1.51272986061701	0.0758416838526894	0.999805500558022	FALSE
672	PF3D7_0604000.iso1.exon1.amp3_760	-0.0384864762713677	0.274640577756214	0.313127054027582	0.676190004707726	0.177991987147294	1.55574013194768	0.0957476320914345	0.999805500558022	FALSE
673	PF3D7_0604100.iso1.exon1.amp2_3651	-0.114084631321132	0.180193311170312	0.294277942491444	0.458173547192709	0.51672719832703	0.786844554106852	0.088644684872139	0.999805500558022	FALSE
674	PF3D7_0604500.iso1.exon1.amp3_3986	-0.120560316256419	0.338164386006385	0.458724702262804	0.12571748696032	0.651397865931802	0.519668401529263	0.119814209984609	0.999805500558022	FALSE
675	PF3D7_0605000.iso1.exon1.amp1_1561	-0.0521827967241189	-0.0248362078334619	0.027346588890657	0.971262101183813	0.21728555615287	1.5936721860677	0.00800512458896716	0.999805500558022	FALSE
676	PF3D7_0605500.iso1.exon2.amp1_4494	0.0142826333550339	0.0855241985972246	0.0712415652421907	0.789407569276534	0.283061556045512	0.549763864579386	0.0366770510474223	0.999805500558022	FALSE
677	PF3D7_0605600.iso1.exon1.amp1_3384	-0.113082408797489	0.0441706965661069	0.157253105363596	0.737915024724758	0.325410615650951	0.974184372229682	0.0586671924144183	0.999805500558022	FALSE
678	PF3D7_0605600.iso1.exon1.amp2_2481	-0.0354467930360958	0.0855298737684279	0.120976666804524	0.486737014497975	0.256323520499283	0.344455353373289	0.0753598223319203	0.999805500558022	FALSE
679	PF3D7_0605600.iso1.exon4.amp1_4428	-0.0457049021493714	0.0894134111818858	0.135118313331257	0.630855843378187	0.264501040737042	0.575270735925729	0.0715875186672741	0.999805500558022	FALSE
680	PF3D7_0606000.iso1.exon1.amp2_2795	-0.0910516780476828	-0.0149963518863128	0.07605532616137	0.577693303353893	0.429389931543756	0.241613953496206	0.0307096109219025	0.999805500558022	FALSE
681	PF3D7_0606100.iso1.exon4.amp1_4473	0.0316237448137419	0.0595378360955443	0.0279140912818024	0.942676502328525	0.455777556832225	0.800806994218572	0.00919669321140749	0.999805500558022	FALSE
682	PF3D7_0606500.iso1.exon5.amp1_1589	-0.132588191831368	-0.103186234096908	0.0294019577344597	0.938640399583828	0.479452707153998	0.785735382724765	0.00937990717811531	0.999805500558022	FALSE
683	PF3D7_0606600.iso1.exon2.amp1_2254	0.00265683390697891	-0.0486657587464389	-0.0513225926534178	0.741542933245808	0.229713867096615	0.315407267026476	-0.0355301915412512	0.999805500558022	FALSE
684	PF3D7_0606700.iso1.exon1.amp1_3408	-0.0749167132015886	0.122235735481482	0.19715244868307	0.182082801361495	0.4267755702065	0.25201330493221	0.0799398422013077	0.999805500558022	FALSE
685	PF3D7_0606800.1o1_4981	-0.049626213744047	0.12330172806214	0.172927941806187	0.41750895321443	0.296995585523204	0.419007773075897	0.0921071543255301	0.999805500558022	FALSE
686	PF3D7_0607300.2o2_5577	0.0253521441949903	0.0636426135357308	0.0382904693407405	0.57641577440185	0.259757989808459	0.109821009817834	0.0257720197113349	0.999805500558022	FALSE
687	PF3D7_0607600.1o5_6489	-0.0845702764275399	-0.0470225211087669	0.037547755318773	0.802917409457697	0.594413013850212	0.235324041944591	0.0110587895630915	0.999805500558022	FALSE
688	PF3D7_0607700.iso1.exon1.amp2_seg1_2869	-0.0475427451900606	0.137891071790251	0.185433816980311	0.258250004062603	0.395534412006429	0.296549171048507	0.0801095237582312	0.999805500558022	FALSE
689	PF3D7_0608100.iso1.exon1.amp1_4297	-0.0588743392847306	0.114733688385327	0.173608027670058	0.424279310876934	0.336038224467493	0.425008393654706	0.0833727326655176	0.999805500558022	FALSE
690	PF3D7_0608100.iso1.exon1.amp2_2496	-0.039147944916913	0.22351068668426	0.262658631601173	0.414326328773077	0.405146233645502	0.634348917151716	0.100267562683753	0.999805500558022	FALSE
691	PF3D7_0608310.iso1.exon3.amp1_440	-0.105714892575598	0.0729229342157371	0.178637826791335	0.169373975324832	0.348807339674364	0.224235230346359	0.0882826456121384	0.999805500558022	FALSE
692	PF3D7_0608400.iso1.exon2.amp1_1521	-0.163877249664647	-0.302627738449579	-0.138750488784933	0.85849003502367	0.423832943359838	1.62582727002301	-0.0343442257468218	0.999805500558022	FALSE
693	PF3D7_0608500.2o2_7844	-0.0626632051491033	0.0689421059033919	0.131605311052495	0.152424900484072	0.235747690361373	0.158751819031553	0.0960016345803547	0.999805500558022	FALSE
694	PF3D7_0609000.iso1.exon1.amp1_3985	-0.0958203663133182	0.0638980101300561	0.159718376443374	0.431038752059428	0.509929502613685	0.376218865481213	0.0535766790186325	0.999805500558022	FALSE
695	PF3D7_0609000.iso1.exon1.amp2_4274	-0.181830850564729	-0.037366999663136	0.144463850901593	0.465405988432118	0.535153762893871	0.362841116264242	0.0464058884101537	0.999805500558022	FALSE
696	PF3D7_0609300.iso1.exon1.amp1_745	-0.0819691349361133	-0.0503614139394998	0.0316077209966136	0.919386097285776	0.241146501504326	0.650861123726536	0.0167630497107206	0.999805500558022	FALSE
697	PF3D7_0609900.iso1.exon1.amp2_2850	-0.0279391284896223	-0.00949889161579449	0.0184402368738278	0.943846560932867	0.320660573494757	0.539165107774893	0.00873842958744968	0.999805500558022	FALSE
698	PF3D7_0610000.iso1.exon2.amp1_2117	-0.0173100887362772	-0.0927056403219368	-0.0753955515856596	0.688984213871676	0.136471139627908	0.389000164157055	-0.0687901754347005	0.999805500558022	FALSE
699	PF3D7_0610200.1o1_5636	-0.037786751037001	0.0493380694492753	0.0871248204862763	0.599968287339	0.37791547000301	0.319252949225205	0.0390496701812226	0.999805500558022	FALSE
700	PF3D7_0611800.iso1.exon5.amp1_seg1_1151	0.0051783372854355	-0.00355889760618808	-0.00873723489162358	0.847033010883868	0.172258485812853	0.0730964229348588	-0.00886716917661767	0.999805500558022	FALSE
701	PF3D7_0611800.iso1.exon5.amp3_508	-0.166301216644491	0.416174187339496	0.582475403983987	0.2967707747592	0.650637946175936	1.07335732256322	0.136703690118927	0.999805500558022	FALSE
702	PF3D7_0611900.iso1.exon1.amp1_2690	-0.0136856795880414	0.0601421686432015	0.0738278482312429	0.520997403281727	0.213287493938514	0.224995792855842	0.0573322319966523	0.999805500558022	FALSE
703	PF3D7_0612700.1o1_6423	-0.060518405828452	-0.0120768494708777	0.0484415563575743	0.869568268271177	0.242539322830444	0.613460793770033	0.0263185893782492	0.999805500558022	FALSE
704	PF3D7_0613300.iso1.exon3.amp1_635	-0.0805246216272745	-0.0806355962096596	-0.000110974582385084	0.999055366523183	0.243481386030387	0.1780954333796	-7.80055244085838e-05	0.999805500558022	FALSE
705	PF3D7_0613300.iso1.exon5.amp1_2341	-0.0945120014145466	0.101712061581653	0.1962240629962	0.0299306882702691	0.273554840162462	0.136573330018348	0.124873565986533	0.999805500558022	FALSE
706	PF3D7_0613900.iso1.exon1.amp2_2265	-0.0273586208321989	-0.0187869661094997	0.00857165472269922	0.982095377082622	0.267367233073913	0.79763600173137	0.00389926109070314	0.999805500558022	FALSE
707	PF3D7_0614000.iso1.exon1.amp1_157	-0.0578048850222491	0.115555477299761	0.17336036232201	0.183627995791763	0.195762842387519	0.238246061111092	0.143800260493512	0.999805500558022	FALSE
708	PF3D7_0614400.1o1_8430	-0.0799115269924012	0.108270685764088	0.188182212756489	0.730641806315121	0.275204696435319	1.1358615411826	0.068331344669847	0.999805500558022	FALSE
709	PF3D7_0614800.iso1.exon1.amp1_433	-0.104854290603712	0.0351058174631895	0.139960108066902	0.259694154241626	0.525199982691602	0.174823546907542	0.0467861868708445	0.999805500558022	FALSE
710	PF3D7_0615100.1o1_7590	-0.0276785435119755	0.132910415402514	0.16058895891449	0.50114583617855	0.164959447471075	0.483531860413053	0.119497474385778	0.999805500558022	FALSE
711	PF3D7_0615600.5o8_7086	-0.0365760273910391	0.0965661972868702	0.133142224677909	0.343725176655516	0.193445814602792	0.272239035849069	0.108930526994583	0.999805500558022	FALSE
712	PF3D7_0615800.2o3_6521	-0.0460945211434313	0.0576418639898652	0.103736385133296	0.204557820663396	0.245502171850826	0.13903268193213	0.0732428741717922	0.999805500558022	FALSE
713	PF3D7_0616000.1o3_5009	-0.0204632935388216	0.046007016003843	0.0664703095426647	0.279371900150982	0.150220931179623	0.111451598851804	0.0756611553216397	0.999805500558022	FALSE
714	PF3D7_0616300.iso1.exon1.amp1_967	-0.0719172418221316	-0.0659713269549904	0.00594591486714123	0.979214161021046	0.524695154204346	0.444294378643904	0.00191910072873181	0.999805500558022	FALSE
715	PF3D7_0616800.iso1.exon1.amp1_2475	-0.0259601409234161	0.187887562164967	0.213847703088383	0.288402619919368	0.227851707106681	0.386605604600831	0.142275177237172	0.999805500558022	FALSE
716	PF3D7_0617000.1o1_8750	-0.0933648854374013	0.013326032566766	0.106690918004167	0.71434712166188	0.239850718379282	0.601806345019277	0.0588242613816974	0.999805500558022	FALSE
717	PF3D7_0617400.s3 (renamed)_7396	-0.057902757140994	0.0581810742408212	0.116083831381815	0.0588052823620453	0.241684502036924	0.0863943572630954	0.0842377746112494	0.999805500558022	FALSE
718	PF3D7_0617600.iso1.exon1.amp1_3292	-0.156724381548602	0.170932356195366	0.327656737743968	0.57519797759318	0.572862784687	1.18842429088927	0.0815306041667385	0.999805500558022	FALSE
719	PF3D7_0617700.iso1.exon1.amp1_3596	-0.188560558446213	0.0100423575323475	0.19860291597856	0.591485572888733	0.533210558066563	0.742749043780889	0.059068425943239	0.999805500558022	FALSE
720	PF3D7_0618500.1o1_6121	-0.076122988442161	0.0577044506736737	0.133827439115835	0.122838841842699	0.242143255423584	0.145340795511898	0.095572422773673	0.999805500558022	FALSE
721	PF3D7_0618700.1o2_6708	-0.0479825179504853	0.0371494812271681	0.0851319991776534	0.714125611704968	0.290937688431875	0.474222736881891	0.0448176114992562	0.999805500558022	FALSE
722	PF3D7_0618900.2o10_5031	-0.00380781452081859	-0.0164483945796754	-0.0126405800588568	0.942777127153424	0.211555086810277	0.362953119759287	-0.00903101883815777	0.999805500558022	FALSE
723	PF3D7_0618900.iso2.exon2.amp1_2167	0.0719372950638462	0.0286107311449797	-0.0433265639188666	0.834866162221977	0.51746036998282	0.397702308182333	-0.0142834477627018	0.999805500558022	FALSE
724	PF3D7_0619000.1.12o14_6224	-0.0480473722455222	-0.104034678894319	-0.0559873066487968	0.846304077382104	0.345280958338719	0.594178394089182	-0.0244881007027844	0.999805500558022	FALSE
725	PF3D7_0619000.1.e12_5382	-0.0459805587792288	0.0169356056063698	0.0629161643855986	0.689652685094041	0.272093334552325	0.314796240393214	0.0378334048365459	0.999805500558022	FALSE
726	PF3D7_0619000.1.s1 (renamed)_5662	8.11046714992032e-06	-0.0128620394374433	-0.0128701499045932	0.970987448914575	0.2249756912371	0.739796160688583	-0.00659457855920723	0.999805500558022	FALSE
727	PF3D7_0619000.iso2.exon13.amp1_3564	-0.120528217368984	0.0372927071242625	0.157820924493247	0.445962410071818	0.370115213803067	0.402341725316309	0.0703615696247488	0.999805500558022	FALSE
728	PF3D7_0619400.iso1.exon1.amp1_727	-0.0530135042981479	0.071789955826971	0.124803460125119	0.514521704913324	0.175364076555378	0.3868957464713	0.099199339357674	0.999805500558022	FALSE
729	PF3D7_0619400.iso1.exon2.amp1_2684	-0.0617282593978559	-0.0987880425368591	-0.0370597831390032	0.966017276363414	0.378067570544408	1.82362951576201	-0.00876521520734493	0.999805500558022	FALSE
730	PF3D7_0619700.iso1.exon2.amp1_2417	0.0014872134770815	0.0847888457819153	0.0833016323048338	0.651794020067297	0.387663501377495	0.360288211765853	0.0360877449453225	0.999805500558022	FALSE
731	PF3D7_0619900.iso1.exon1.amp1_2419	0.00471097117380844	-0.0313231277888612	-0.0360340989626696	0.834735701198568	0.346298258668852	0.342173359863806	-0.0173653772606018	0.999805500558022	FALSE
732	PF3D7_0620000.1o1_5588	-0.0470293146414875	0.0550974342418161	0.102126748883304	0.576131522567365	0.297142082829113	0.363335673291676	0.0557691721242798	0.999805500558022	FALSE
733	PF3D7_0620100.2o2_6690	-0.0486025604081778	-0.0557044506390149	-0.0071018902308371	0.978342241206688	0.174722691961476	0.546631122622275	-0.00481872512394841	0.999805500558022	FALSE
734	PF3D7_0620200.1o1_6128	-0.211839209231474	0.0297116761777346	0.241550885409208	0.403986359587911	0.649001297301623	0.545056222518139	0.0630725644810306	0.999805500558022	FALSE
735	PF3D7_0620400.1o1_7613	0.0374071934966996	0.140618361151573	0.103211167654874	0.737230334197122	0.405449647988895	0.627132006093256	0.0394821375610548	0.999805500558022	FALSE
736	PF3D7_0620600.1o1_5842	-0.0305473212132429	0.00074031597914157	0.0312876371923845	0.806124477043368	0.172479438105174	0.260429443932092	0.0282886445354259	0.999805500558022	FALSE
737	PF3D7_0621200.iso1.exon1.amp1_1855	-0.0554386007097466	0.0471507920676544	0.102589392777401	0.677561835922832	0.28578847674514	0.503724407715828	0.05385618852064	0.999805500558022	FALSE
738	PF3D7_0621400.1o1_8784	-0.0378369066914145	0.258277260607638	0.296114167299053	0.170038069595631	0.304628199943928	0.392302311679797	0.156388726091974	0.999805500558022	FALSE
739	PF3D7_0621900.1o1_7648	-0.101998494310326	0.139600420869433	0.241598915179758	0.0644461271926633	0.490185330172442	0.190443065139154	0.0863178822208435	0.999805500558022	FALSE
740	PF3D7_0622000.iso1.exon1.amp1_2087	-0.0810339134242599	-0.0204112170289921	0.0606226963952678	0.484443638904422	0.292243785404814	0.147780252914637	0.036097974938563	0.999805500558022	FALSE
741	PF3D7_0622000.iso1.exon3.amp1_2970	-0.0251811433962143	0.0221027480230134	0.0472838914192277	0.5999860444403	0.313278540019462	0.152639960843233	0.0262940552586908	0.999805500558022	FALSE
742	PF3D7_0622100.iso1.exon1.amp1_seg1_3159	-0.0669051161029323	0.0640729552468415	0.130978071349774	0.140184699720969	0.292254450106598	0.143326138676088	0.0780603482525945	0.999805500558022	FALSE
743	PF3D7_0622100.iso1.exon1.amp2_seg2_2303	-0.0484196505708519	-0.0542902524071842	-0.00587060183633223	0.986600714978642	0.20859010403324	0.731301919416426	-0.00312393154328996	0.999805500558022	FALSE
744	PF3D7_0622800.s1 (renamed)_4799	-0.0139861672445848	0.0885978450956745	0.102584012340259	0.811663356253549	0.436663649985628	0.889312145308999	0.0337019023713246	0.999805500558022	FALSE
745	PF3D7_0622800.s2 (renamed)_5666	-0.00522825627433291	0.0333096875998734	0.0385379438742063	0.928455334290808	0.149940887290533	0.900210372878746	0.0193637290599071	0.999805500558022	FALSE
746	PF3D7_0623300.iso1.exon4.amp1_75	-0.0408245368878109	0.0480398824417108	0.0888644193295217	0.208883688606917	0.137134476944149	0.128916484032586	0.108705966867431	0.999805500558022	FALSE
747	PF3D7_0623400.1o1_5006	-0.00979295138751691	-0.0932967397478809	-0.0835037883603639	0.738261866298393	0.300891906107242	0.511471588625626	-0.0420495931697209	0.999805500558022	FALSE
748	PF3D7_0623700.iso1.exon1.amp2_4528	-0.0827004324873139	0.121252864229767	0.203953296717081	0.54864847386242	0.349541492877762	0.688272101122092	0.0846533604457662	0.999805500558022	FALSE
749	PF3D7_0623800.iso1.exon1.amp3_470	-0.0367108906086871	0.0291641786536228	0.06587506926231	0.677094316471381	0.301367008799932	0.312878276827124	0.0362746989043501	0.999805500558022	FALSE
750	PF3D7_0623900.1o1_5269	0.0422847105702304	0.0488561775071314	0.00657146693690108	0.99174599651055	0.190700814342419	1.33359507612817	0.00228406803231251	0.999805500558022	FALSE
751	PF3D7_0624500.iso1.exon1.amp1_1536	-0.0936577920438422	0.0112370440315317	0.104894836075374	0.129076812014936	0.214065530819205	0.113282162014008	0.0851453612994596	0.999805500558022	FALSE
752	PF3D7_0624600.iso1.exon1.amp2_2263	-0.0450353718742018	-0.0641017956513668	-0.019066423777165	0.902844384353184	0.417622859012238	0.294484566484549	-0.00783098368888856	0.999805500558022	FALSE
753	PF3D7_0624900.iso1.exon8.amp1_2391	-0.0395649338495778	0.0404009025096073	0.0799658363591851	0.369749937621489	0.200896039547808	0.166808517685165	0.0675160970773129	0.999805500558022	FALSE
754	PF3D7_0625000.iso2.exon1.amp1_1527	-0.0605037597336345	-0.145767852240479	-0.0852640925068442	0.874791852696238	0.248580579072407	1.13227716643277	-0.03198652172311	0.999805500558022	FALSE
755	PF3D7_0625400.1o1_5288	-0.032446893357682	0.142474101379184	0.174920994736866	0.1032252724849	0.246174119468319	0.18255701613031	0.121503311286413	0.999805500558022	FALSE
756	PF3D7_0625500.1o1_7006	-0.0686436048076408	0.115258189876254	0.183901794683895	0.0761559892569802	0.261603109560386	0.170802664720204	0.121086272772466	0.999805500558022	FALSE
757	PF3D7_0625600.1o1_7626	-0.0450418361208565	0.106822163307119	0.151863999427976	0.330948195944518	0.265547775118895	0.298155078317185	0.0939639196264884	0.999805500558022	FALSE
758	PF3D7_0626100.iso1.exon2.amp1_4098	-0.0522592471349127	0.091617946544072	0.143877193678985	0.0464217359835891	0.288568892037797	0.0993289751544937	0.0874933470836802	0.999805500558022	FALSE
759	PF3D7_0626600.1o1_6969	-0.0270457751387994	0.113706865249186	0.140752640387986	0.509137052789627	0.23811874163875	0.428379895535091	0.0881694459272677	0.999805500558022	FALSE
760	PF3D7_0626800.iso1.exon1.amp1_2938	-0.0952876005768733	0.0610406759236465	0.15632827650052	0.0346000435856819	0.330791128169789	0.0886963374858712	0.0831698497339926	0.999805500558022	FALSE
761	PF3D7_0626800.iso1.exon2.amp1_1841	-0.0990371976147506	0.0687266539455774	0.167763851560328	0.0253878665687027	0.266224890051184	0.107399732197699	0.110281231491861	0.999805500558022	FALSE
762	PF3D7_0626800.iso1.exon3.amp1_689	-0.144190587220273	-0.060143767579337	0.0840468196409362	0.353484554109502	0.445865102972901	0.0983257416362066	0.0332220750202016	0.999805500558022	FALSE
763	PF3D7_0626900.1o1_4986	-0.0513367294998198	0.168107765611781	0.2194444951116	0.411239034981626	0.400849046625827	0.522076680034417	0.0879043666622471	0.999805500558022	FALSE
764	PF3D7_0627000.1o1_6672	-0.043899755038534	0.0138678274134435	0.0577675824519775	0.564473119963826	0.185360973264699	0.197062444422141	0.0515697197237214	0.999805500558022	FALSE
765	PF3D7_0627100.iso1.exon1.amp1_4595	-0.18845440761291	0.218877942065789	0.407332349678699	0.0335536721573	0.635767333571751	0.284998639570652	0.111863550900996	0.999805500558022	FALSE
766	PF3D7_0627400.1o1_5247	-0.0857468482257414	-0.055168470628422	0.0305783775973194	0.783244990395269	0.390227726952863	0.188593904306206	0.0136543867592643	0.999805500558022	FALSE
767	PF3D7_0628000.1o1_7263	-0.0898015960159245	0.0586097958130594	0.148411391828984	0.470493804468458	0.352991126787133	0.402307197468805	0.0689377024632552	0.999805500558022	FALSE
768	PF3D7_0628100.iso1.exon1.amp10_2250	-0.0819312933822316	-0.0402099703990789	0.0417213229831527	0.676060167318353	0.325165847287709	0.175076817179992	0.0222817100707037	0.999805500558022	FALSE
769	PF3D7_0628100.iso1.exon1.amp11_1613	-0.0689241078665688	0.0381162928181091	0.107040400684678	0.377942805449322	0.35259939614619	0.215987546923758	0.052449079191133	0.999805500558022	FALSE
770	PF3D7_0628100.iso1.exon1.amp6_2244	0.0351642768703228	0.0214075131986931	-0.0137567636716297	0.901685659923537	0.235421426062503	0.219453947749067	-0.00981079474518401	0.999805500558022	FALSE
771	PF3D7_0628100.iso1.exon1.amp7_1383	-0.05250563211316	-0.109321542112306	-0.0568159099991462	0.942349347164904	0.329099536858204	1.646968208059	-0.0150162597601018	0.999805500558022	FALSE
772	PF3D7_0628100.iso1.exon1.amp9_1961	-0.0349474894630733	-0.0231361780685706	0.0118113113945027	0.977905806048182	0.37509215504208	0.887277680281163	0.00427003736849332	0.999805500558022	FALSE
773	PF3D7_0628200.s1_6574	-0.0250515148252646	0.106704720674579	0.131756235499844	0.121289734584554	0.125916878963579	0.149542782406146	0.170549966073954	0.999805500558022	FALSE
774	PF3D7_0628200.s2 (renamed)_6863	-0.12387840580269	-0.025086812424345	0.0987915933783451	0.355116671522326	0.425995549694733	0.161439509934604	0.0406327512662628	0.999805500558022	FALSE
775	PF3D7_0628600.iso1.exon3.amp1_4371	-0.080440805627864	0.017542829549495	0.0979836351773589	0.0696009640369634	0.221905088952591	0.0738325313108429	0.077522367919298	0.999805500558022	FALSE
776	PF3D7_0629000.iso1.exon1.amp1_120	-0.131280983734986	0.185042692000689	0.316323675735675	0.230116372313572	0.325908985063562	0.494555882222298	0.151192330805316	0.999805500558022	FALSE
777	PF3D7_0629300.1o1_7935	-0.0696926064598699	0.121851209155585	0.191543815615455	0.706024123379809	0.267985050659524	1.05317036143792	0.0738084926784424	0.999805500558022	FALSE
778	PF3D7_0629500.1o2_8488	-0.0516441768412333	-0.0830436318396089	-0.0313994549983756	0.967753302148943	0.179432301820303	1.63122819116609	-0.00918997379631891	0.999805500558022	FALSE
779	PF3D7_0629600.iso1.exon2.amp1_3286	-0.0318360651826877	-0.0796752450926181	-0.0478391799099305	0.90118180963701	0.132086152756288	0.807706889846269	-0.0268782439428954	0.999805500558022	FALSE
780	PF3D7_0629700.s3 (renamed)_7149	-0.0524432494526763	-0.0560016722981576	-0.00355842284548125	0.989158086829654	0.449034690526654	0.528542266036225	-0.00129336011640038	0.999805500558022	FALSE
781	PF3D7_0629700.s5 (renamed)_7727	-0.0450707307628269	-0.0268359852549413	0.0182347455078856	0.925699647422361	0.353420491235372	0.392567298488234	0.00848961022608538	0.999805500558022	FALSE
782	PF3D7_0629900.iso1.exon1.amp1_3279	-0.0704222646038486	0.0440905044573299	0.114512769061178	0.580316334757999	0.359090170824653	0.410059175809873	0.0522739069953329	0.999805500558022	FALSE
783	PF3D7_0630300.iso1.exon2.amp3_4257	-0.0670242332473548	0.0479057900311616	0.114930023278516	0.433980108695762	0.459459512290977	0.256962749810272	0.0433793438845998	0.999805500558022	FALSE
784	PF3D7_0630600.2o2_8237	-0.0674965426898874	0.0726207552353863	0.140117297925274	0.405781896137486	0.325603422007751	0.323123947968799	0.0717823900556622	0.999805500558022	FALSE
785	PF3D7_0631000.iso1.exon1.amp1_2426	-0.103476367518971	0.192554459398373	0.296030826917343	0.000757422244159965	0.337730142961852	0.103841024818388	0.154042703892868	0.707937324208181	FALSE
786	PF3D7_0631100.iso1.exon2.amp1_1011	-0.0698256302756998	0.123785214951367	0.193610845227067	0.336701029549931	0.237496712135033	0.391589947818978	0.12450096786976	0.999805500558022	FALSE
787	PF3D7_0631400.iso1.exon1.amp1_1562	-0.117182286739208	0.0906961885244858	0.207878475263694	0.703174826019739	0.563799967059209	1.1198302784289	0.0533408824735594	0.999805500558022	FALSE
788	PF3D7_0631800.iso1.exon2.amp1_3318	-0.128982387339623	0.0634195286170169	0.19240191595664	0.650529755180157	0.474497800279835	0.866299961211614	0.0602237667646026	0.999805500558022	FALSE
789	PF3D7_0631900.iso1.exon2.amp1_3298	-0.159481574451668	0.130521030572763	0.290002605024431	0.56803747323346	0.467676855176124	1.03306267977755	0.0863931134231227	0.999805500558022	FALSE
790	PF3D7_0632000.iso1.exon2.amp1_3020	-0.147431543388071	-0.0289395693016509	0.11849197408642	0.356669105141199	0.598220724795137	0.159333033970883	0.0348606464180639	0.999805500558022	FALSE
791	PF3D7_0632100.iso1.exon1.amp1_705	-0.094920881426719	0.0683496279057156	0.163270509332435	0.488185319054684	0.317588962239903	0.468588317900649	0.0805755242553357	0.999805500558022	FALSE
792	PF3D7_0632200.iso1.exon1.amp1_3015	-0.144976172149838	0.260680429059451	0.405656601209288	0.0541744561762635	0.42765241694566	0.34257031376183	0.161338704292466	0.999805500558022	FALSE
793	PF3D7_0632300.iso1.exon2.amp1_423	-0.140205325042719	0.18729198821558	0.327497313258299	0.545296946289093	0.350941929398949	1.10401604506228	0.11029575930781	0.999805500558022	FALSE
794	PF3D7_0632400.iso1.exon2.amp1_3304	-0.0991102295912804	0.0376449863096472	0.136755215900928	0.716640386726895	0.62890819998088	0.756173917889984	0.0353761270418041	0.999805500558022	FALSE
795	PF3D7_0632500.iso1.exon1.amp1_3326	-0.161330114438147	0.0751743309605118	0.236504445398659	0.143570073858082	0.699951646028806	0.215952660218254	0.0593783069884301	0.999805500558022	FALSE
796	PF3D7_0632500.iso1.exon2.amp1_1064	-0.0935600977138408	0.0173263955398699	0.110886493253711	0.374579112863677	0.221599184457149	0.239845553761375	0.0826154524306236	0.999805500558022	FALSE
797	PF3D7_0632500.iso1.exon2.amp3_492	-0.0489087107832897	0.134678748156538	0.183587458939828	0.658024704222811	0.200155256042771	0.857515097639569	0.089333878582245	0.999805500558022	FALSE
798	PF3D7_0632500.iso1.exon2.amp4_seg2_4605	-0.0147746326966945	0.121953054919378	0.136727687616072	0.307983740897047	0.257591591804485	0.252220453375854	0.0886689400950573	0.999805500558022	FALSE
799	PF3D7_0632700.iso1.exon2.amp1_2437	-0.117745751886926	0.240249088391221	0.357994840278147	0.338586887935107	0.551024895118478	0.72117885716917	0.104231761270023	0.999805500558022	FALSE
800	PF3D7_0632800.iso1.exon1.amp1_4482	-0.109824841737108	0.111500394620065	0.221325236357173	0.215616330851975	0.334796626999129	0.327511923585857	0.110443367621527	0.999805500558022	FALSE
801	PF3D7_0700100.iso1.exon3.amp1_1301	-0.168372679612578	0.119931822170869	0.288304501783447	0.0118633321054499	0.430711890888961	0.153913250559752	0.117395333216807	0.999805500558022	FALSE
802	PF3D7_0700200.iso1.exon3.amp1_994	-0.0770950137478295	-0.0603866873866313	0.0167083263611982	0.883414094171625	0.339858400702225	0.20800706500714	0.00849421166092398	0.999805500558022	FALSE
803	PF3D7_0700300.iso1.exon3.amp1_3589	-0.0930491898014956	0.036744770636022	0.129793960437518	0.649007022970765	0.26520484541049	0.584488820667521	0.0682447377155142	0.999805500558022	FALSE
804	PF3D7_0700400.iso1.exon3.amp1_4165	-0.110893451920262	0.085495877416772	0.196389329337034	0.537542284950146	0.426898337805777	0.637958965398809	0.071904607605821	0.999805500558022	FALSE
805	PF3D7_0700500.iso1.exon3.amp1_2741	-0.113383811064972	0.084023881265729	0.197407692330701	0.281228541807259	0.601219068014212	0.3076357193502	0.05711673624172	0.999805500558022	FALSE
806	PF3D7_0701000.1o1_5806	-0.0516603212953696	0.0895745589547385	0.141234880250108	0.640377891881895	0.298076074633659	0.618330982349337	0.0675423965401203	0.999805500558022	FALSE
807	PF3D7_0701100.iso1.exon3.amp1_2151	-0.180228085016972	0.224187988820047	0.404416073837019	0.270701114593478	0.629022272707793	0.68942384579898	0.105976240090376	0.999805500558022	FALSE
808	PF3D7_0701600.iso1.exon2.amp1_4435	-0.11083363307243	0.0711047867886865	0.181938419861116	0.296702873701529	0.584228156148647	0.291026116969775	0.0542168017124035	0.999805500558022	FALSE
809	PF3D7_0701800.iso1.exon1.amp1_3301	-0.111980131138587	0.0327865992200419	0.144766730358629	0.508527076696449	0.456498236549862	0.422262341743245	0.0532831523394554	0.999805500558022	FALSE
810	PF3D7_0701900.e2s1_9111	0.00643211465411085	0.141369953210027	0.134937838555917	0.115624706707052	0.226272812260052	0.144573742031056	0.102829770091988	0.999805500558022	FALSE
811	PF3D7_0702200.1o1_5873	-0.0712532289191993	0.110383848606211	0.181637077525411	0.417281455799151	0.283316873230251	0.441622441774936	0.0992580205348564	0.999805500558022	FALSE
812	PF3D7_0702300.2o2_7331	0.021768982607881	-0.0779896144453048	-0.0997585970531857	0.76666156281099	0.589232852004929	0.673683054833908	-0.0277475211657309	0.999805500558022	FALSE
813	PF3D7_0702300.e2_6828	-0.0326126692665101	0.000303258038114862	0.032915927304625	0.79943964027286	0.290437327711742	0.252397259414506	0.0191509589958793	0.999805500558022	FALSE
814	PF3D7_0702400.e1s1_8040	-0.107939840485455	-0.0273289077288855	0.0806109327565699	0.921777241785177	0.423362142971655	1.71836913973117	0.0192440353097053	0.999805500558022	FALSE
815	PF3D7_0702500.e1s1_8598	-0.0771073346629114	-0.131141030428706	-0.0540336957657948	0.551733873320456	0.315611217855918	0.153179113801085	-0.0298288000598377	0.999805500558022	FALSE
816	PF3D7_0702600.iso1.exon1.amp1_3842	-0.0635151989569078	-0.098210580782504	-0.0346953818255961	0.928802289585916	0.20673839477536	0.812700930554318	-0.017326834043464	0.999805500558022	FALSE
817	PF3D7_0703100.1o1_5246	-0.100387551367087	0.0420475578766716	0.142435109243759	0.804095110872698	0.475441144959836	1.19117808718369	0.0396433287359377	0.999805500558022	FALSE
818	PF3D7_0703200.iso1.exon1.amp1_4307	0.0272495062279707	0.0130323958306811	-0.0142171103972897	0.965154797203243	0.40096222049513	0.670192492351052	-0.0053962381029698	0.999805500558022	FALSE
819	PF3D7_0703300.iso1.exon1.amp1_3572	-0.00769139180667167	0.0655957934505544	0.0732871852572261	0.270094716446719	0.267524172090091	0.0984328331981074	0.0480226476955582	0.999805500558022	FALSE
820	PF3D7_0703500.e2s2_7503	-0.105373521454856	0.0443972864039043	0.14977080785876	0.582427821987642	0.720790758589855	0.507618584997113	0.0356435905981492	0.999805500558022	FALSE
821	PF3D7_0703700.e1s1_8629	-0.103003661854424	-0.230599702758489	-0.127596040904065	0.888554458392209	0.490400181524035	1.90403536320855	-0.0270824853942911	0.999805500558022	FALSE
822	PF3D7_0704000.iso1.exon1.amp1_seg1_3736	-0.106188409743244	0.0755113777531331	0.181699787496377	0.466629566736319	0.507145212582821	0.480315175057848	0.0600579528324307	0.999805500558022	FALSE
823	PF3D7_0704200.iso1.exon1.amp1_252	-0.0283709836862784	0.0115243311518366	0.039895314838115	0.903698587285041	0.220025577762019	0.688357846411096	0.021496037341505	0.999805500558022	FALSE
824	PF3D7_0704200.iso1.exon1.amp2_769	-0.110628311133798	-0.0191437655038573	0.0914845456299405	0.852647342661654	0.325895264870551	1.02692912104854	0.0331479216746119	0.999805500558022	FALSE
825	PF3D7_0704300.s1_6860	-0.0574293225719642	-0.0181043880041109	0.0393249345678532	0.622500923005161	0.278391168751557	0.135179776329515	0.0246110481720129	0.999805500558022	FALSE
826	PF3D7_0704500.iso1.exon1.amp2_178	-0.0918208409436032	0.0630949291273826	0.154915770070986	0.297197159114553	0.353378045252439	0.271852254725759	0.0747796769981324	0.999805500558022	FALSE
827	PF3D7_0704600.iso1.exon5.amp3_seg1_283	-0.0507638598624198	0.055225661911398	0.105989521773818	0.596106670839729	0.478546900417181	0.380897710483851	0.0376889648007097	0.999805500558022	FALSE
828	PF3D7_0704800.iso1.exon1.amp1_3430	0.0248467840893595	0.187229894409704	0.162383110320344	0.825092585644612	0.257051970309793	1.53675552554838	0.0477578935816178	0.999805500558022	FALSE
829	PF3D7_0704800.iso1.exon1.amp2_1629	0.0115102097279092	-0.0768006036001577	-0.0883108133280669	0.883574688863534	0.393684361564196	1.25866149580499	-0.0262749390939064	0.999805500558022	FALSE
830	PF3D7_0704900.iso1.exon1.amp1_3311	-0.0117433560051022	-0.0432214389722677	-0.0314780829671655	0.915818419335982	0.349378159391535	0.614098366303284	-0.0135277969855919	0.999805500558022	FALSE
831	PF3D7_0705000.e1s1_7991	-0.0486405783701154	0.0679668897694178	0.116607468139533	0.42055017240835	0.296497326878198	0.276496184322585	0.0660271767815713	0.999805500558022	FALSE
832	PF3D7_0705000.e1s2_6251	0.0113565218651984	0.0140026575171458	0.00264613565194739	0.988091947879755	0.175231047221342	0.367856848335073	0.0021435765038599	0.999805500558022	FALSE
833	PF3D7_0705500.iso1.exon2.amp2_3383	-0.0996460769136552	0.0849296877631264	0.184575764676782	0.235794628565175	0.412560926111645	0.275182995698097	0.0769766861348425	0.999805500558022	FALSE
834	PF3D7_0705500.iso1.exon2.amp3_1354	-0.108829581191779	0.0105608773766985	0.119390458568478	0.111579811235691	0.311848703050829	0.103692283454405	0.0672156208209368	0.999805500558022	FALSE
835	PF3D7_0705600.iso1.exon1.amp2_4245	-0.0221721940013963	-0.152625967142825	-0.130453773141429	0.880350010075853	0.366903712885345	1.81452995590468	-0.0312041592040017	0.999805500558022	FALSE
836	PF3D7_0706500.iso1.exon1.amp1_3144	-0.069423459906514	0.000441402681434511	0.0698648625879485	0.608318040417743	0.478175136074032	0.2297306034018	0.0254636354143678	0.999805500558022	FALSE
837	PF3D7_0706700.1o1_8234	-0.0711245282319442	0.0582210961753201	0.129345624407264	0.553286366214979	0.425243688007075	0.42608851955282	0.0506835087881548	0.999805500558022	FALSE
838	PF3D7_0707200.iso1.exon1.amp1_1982	-0.0213089513625498	0.0891620086621046	0.110470960024654	0.394988708312755	0.161315936387905	0.255221372060048	0.10565302845587	0.999805500558022	FALSE
839	PF3D7_0707300.2o5_6209	-0.00870828792457771	-0.0481842000451937	-0.039475912120616	0.647582487258237	0.353817265612224	0.12997840044147	-0.0195589536307342	0.999805500558022	FALSE
840	PF3D7_0707400.iso1.exon1.amp1_1310	-0.0563648368320139	0.350942492710982	0.407307329542996	0.630281409586922	0.341015583246946	1.74677170817113	0.102062557505908	0.999805500558022	FALSE
841	PF3D7_0707500.iso1.exon1.amp2_467	-0.0813449458429456	0.102607058934413	0.183952004777359	0.212031261897438	0.334712566158297	0.264939060432741	0.0935587095535728	0.999805500558022	FALSE
842	PF3D7_0707700.1o1_5353	-0.138227137664738	-0.0500870610015586	0.088140076663179	0.730859727670441	0.616328409082176	0.491748123889225	0.024331004805463	0.999805500558022	FALSE
843	PF3D7_0708000.e1s1_9235	-0.0292793034236995	0.0337358834565222	0.0630151868802218	0.778830804161584	0.273210846112774	0.460014785027703	0.0350351143562928	0.999805500558022	FALSE
844	PF3D7_0708000.e2s1_8905	-0.0288586309187774	0.0354228132000756	0.064281444118853	0.470105087647606	0.240189438130289	0.163327884037126	0.0459997089522464	0.999805500558022	FALSE
845	PF3D7_0708400.e1_5679	-0.0110299648269949	0.0968147921855486	0.107844757012544	0.425561818056472	0.197514766019148	0.265649637847291	0.0871683608750234	0.999805500558022	FALSE
846	PF3D7_0708400.e2_6536	-0.047993498900945	0.0813154815189684	0.129308980419913	0.0202354151910422	0.142663645149078	0.0836463598469054	0.156893237204206	0.999805500558022	FALSE
847	PF3D7_0709000.e3s1_5972	-0.0255530170394088	0.0297164316697057	0.0552694487091145	0.584717549949908	0.327171049769267	0.176906151212219	0.0293319458805604	0.999805500558022	FALSE
848	PF3D7_0709100.e1s1_4890	-0.0777920460073186	0.242257551509199	0.320049597516517	0.299631319749015	0.407931407654169	0.591499961983754	0.123420074613553	0.999805500558022	FALSE
849	PF3D7_0709300.iso1.exon1.amp3_2493	-0.0412665972174607	0.0129924743669779	0.0542590715844386	0.905481811543482	0.276484422292	0.954967994042802	0.0219795748089344	0.999805500558022	FALSE
850	PF3D7_0709400.iso1.exon2.amp1_2171	-0.0899950272637388	-0.104183039710935	-0.0141880124471959	0.979807039319053	0.6389752971874	1.15793409664285	-0.00330503818690388	0.999805500558022	FALSE
851	PF3D7_0709700.e1s1_7479	0.0230825166789294	-0.0872191043714896	-0.110301621050419	0.773283010969694	0.49538932305841	0.782727543859419	-0.0343623955593572	0.999805500558022	FALSE
852	PF3D7_0709900.3o3_8531	-0.0538208896026958	-0.0149748424497307	0.038846047152965	0.619675315897943	0.250621886384219	0.137800561047909	0.0268966481192569	0.999805500558022	FALSE
853	PF3D7_0709900.e1s2_8563	-0.0942467668358253	0.0314328751941051	0.12567964202993	0.555629222009588	0.385719249937101	0.419654837339681	0.0537594440978746	0.999805500558022	FALSE
854	PF3D7_0709900.e2_7429	-0.00295620126932384	0.107416962858249	0.110373164127572	0.809781678536547	0.297141248574029	0.954743895827736	0.0433870818137618	0.999805500558022	FALSE
855	PF3D7_0709900.e3_5674	-0.0112093388786524	-0.0177354904451288	-0.0065261515664764	0.951630656811245	0.249038758019345	0.209176585654875	-0.00444082389731965	0.999805500558022	FALSE
856	PF3D7_0710200.iso1.exon1.amp2_seg1_3742	-0.103633886540942	-0.0288660757542594	0.0747678107866825	0.612416371366181	0.352254331758857	0.281581549353231	0.0361074468089729	0.999805500558022	FALSE
857	PF3D7_0710200.iso1.exon1.amp3_3649	-0.0567371099099267	0.205194135122823	0.261931245032749	0.734920137959162	0.212296916390558	1.61161105553141	0.0761498821649122	0.999805500558022	FALSE
858	PF3D7_0710300.iso1.exon2.amp1_2630	-0.0601144110511665	0.055430655728577	0.115545066779743	0.179394027434053	0.268255154626323	0.143560323054884	0.0748152953837622	0.999805500558022	FALSE
859	PF3D7_0710400_9160	-0.165236870208992	0.128878262748441	0.294115132957433	0.113935096376082	0.677043417335339	0.283912219059729	0.0759634140966743	0.999805500558022	FALSE
860	PF3D7_0710500.iso1.exon5.amp1_1229	-0.00182782392931016	0.0709139365139862	0.0727417604432963	0.56221362795047	0.181271110218961	0.25113534654808	0.0637064187494086	0.999805500558022	FALSE
861	PF3D7_0711000.e1s1_7491	-0.00617104375794061	0.0695875628777078	0.0757586066356484	0.755090892317934	0.342910970231454	0.49388088191644	0.0348026347555473	0.999805500558022	FALSE
862	PF3D7_0711000.e1s2_8942	-0.00832056617488742	0.0532783659657703	0.0615989321406577	0.916515028439603	0.197296877926484	1.23239901483758	0.022766278177557	0.999805500558022	FALSE
863	PF3D7_0711100.iso1.exon1.amp1_1552	-0.127965890246914	-0.0738189845531359	0.0541469056937785	0.836419309404962	0.431219225488829	0.529764400909711	0.0203597178333897	0.999805500558022	FALSE
864	PF3D7_0711200.iso1.exon1.amp1_2331	-0.00495052927326837	0.00020734175008208	0.00515787102335045	0.962477153768918	0.295999480329434	0.206325806960793	0.00299089522922227	0.999805500558022	FALSE
865	PF3D7_0711300.iso1.exon1.amp1_3846	-0.0869309040167733	0.0323976212813836	0.119328525298157	0.311260973773619	0.40201883558313	0.195595674118879	0.0517119432587668	0.999805500558022	FALSE
866	PF3D7_0711700.e2s1_5452	-0.0377092958910221	0.0851381030371176	0.12284739892814	0.273414464803717	0.294817971629024	0.200500381418443	0.0716196807928361	0.999805500558022	FALSE
867	PF3D7_0712000.iso1.exon1.amp1_145	-0.101904319151258	0.161854263515705	0.263758582666963	0.0930996549281966	0.428305995481253	0.259519553240328	0.106447123399025	0.999805500558022	FALSE
868	PF3D7_0712300.iso1.exon1.amp1_3615	-0.0555789300045032	0.104052884732935	0.159631814737438	0.423830267254391	0.428668385610073	0.379199611411001	0.0628287676626547	0.999805500558022	FALSE
869	PF3D7_0712400.iso1.exon1.amp1_1004	-0.0610167108544221	-0.00573713089336998	0.0552795799610522	0.829133319589965	0.355222643464556	0.523054462114251	0.0244012897587874	0.999805500558022	FALSE
870	PF3D7_0712400.iso1.exon2.amp2_2529	-0.0654183914463362	0.0720212577514442	0.13743964919778	0.831805476726232	0.238534491063501	1.35355815402475	0.0454380404764709	0.999805500558022	FALSE
871	PF3D7_0712600.iso1.exon1.amp1_434	-0.12879057305584	0.157855804069632	0.286646377125472	0.00378041065070499	0.339900992608435	0.130836994070237	0.147718206004447	0.999805500558022	FALSE
872	PF3D7_0712800.iso1.exon1.amp1_3904	-0.0405162286481374	0.0659449880541665	0.106461216702304	0.472463003147684	0.28500356418006	0.287056081918985	0.0622073059027034	0.999805500558022	FALSE
873	PF3D7_0712800.iso1.exon2.amp2_1944	-0.0438578655988519	-0.00611658427456803	0.0377412813242838	0.889773057977423	0.411522430643778	0.554225165651225	0.0146377691985679	0.999805500558022	FALSE
874	PF3D7_0712900.iso1.exon1.amp1_3316	-0.135413182784913	0.164539781057359	0.299952963842272	0.39471995665328	0.559322783646883	0.684713619052893	0.0870022101328729	0.999805500558022	FALSE
875	PF3D7_0712900.iso1.exon2.amp2_215	-0.0450722376460858	0.0127659575098207	0.0578381951559065	0.795479237612461	0.327872455053918	0.453575748432293	0.0280130489564405	0.999805500558022	FALSE
876	PF3D7_0713000.iso1.exon2.amp1_2451	-0.0433108159578659	0.134299085176681	0.177609901134547	0.401277679550122	0.185067239396502	0.419949920410917	0.132330123531469	0.999805500558022	FALSE
877	PF3D7_0713100.2o2_5537	-0.0268822904376262	-0.108109050915238	-0.081226760477612	0.597737259044559	0.254624549685376	0.306427220302381	-0.0518910385659121	0.999805500558022	FALSE
878	PF3D7_0713600.iso1.exon1.amp1_3623	-0.0834082111632652	0.129261023662128	0.212669234825393	0.661561071300915	0.283535459886655	1.00338226975865	0.0827835238439256	0.999805500558022	FALSE
879	PF3D7_0713900.e1s1_5647	-0.0263042763297745	-0.12959945769828	-0.103295181368506	0.5880986309997	0.512331308383116	0.354309296087011	-0.0346214957363409	0.999805500558022	FALSE
880	PF3D7_0713900.e1s3_8249	-0.0789047780695554	0.0882240438910543	0.16712882196061	0.381127118360802	0.547071408259057	0.340897794147506	0.0527400484613754	0.999805500558022	FALSE
881	PF3D7_0713900.e1s4_5937	-0.125128604750869	0.115895682340586	0.241024287091454	0.571033309623028	0.465616073910546	0.861809198517575	0.0765700429650203	0.999805500558022	FALSE
882	PF3D7_0714000.e1s1_6579	-0.0534657765100123	0.0116726096489504	0.0651383861589628	0.369056556314639	0.280257463301415	0.112568077172488	0.0406789123906907	0.999805500558022	FALSE
883	PF3D7_0714200.iso1.exon1.amp2_463	-0.0788145439716265	-0.0202590025722383	0.0585555413993881	0.787611903510993	0.5258419336445	0.417650461338707	0.0189520586684453	0.999805500558022	FALSE
884	PF3D7_0715000.1o1_5833	-0.0096084863671545	0.0443574393280525	0.053965925695207	0.498670931135282	0.249125804529859	0.140523257731381	0.0375540715838587	0.999805500558022	FALSE
885	PF3D7_0715300.1o3_4714	-0.023303674160964	-0.0180773271914404	0.00522634696952359	0.96058246459337	0.186265876279281	0.212902755208933	0.00459878065964046	0.999805500558022	FALSE
886	PF3D7_0715600.1o1_6202	-0.0533585249893333	0.0756007787399739	0.128959303729307	0.664589941093407	0.184580126042279	0.614103211755259	0.079996776629628	0.999805500558022	FALSE
887	PF3D7_0715800.1o1_6729	0.00499594927216913	0.428610373360776	0.423614424088607	0.323389524679826	0.309577840519388	0.837731792037707	0.174784719634221	0.999805500558022	FALSE
888	PF3D7_0716200.1o1_8223	-0.0789751129199733	0.0015490703772258	0.0805241832971991	0.878376069606528	0.323109370653231	1.09882646203219	0.0281710393909739	0.999805500558022	FALSE
889	PF3D7_0716300.e1s1_8921	-0.0651314166030472	0.22185129659951	0.286982713202557	0.450824942071359	0.404187488198318	0.759135378495067	0.104562133697476	0.999805500558022	FALSE
890	PF3D7_0717000.iso1.exon2.amp1_1484	-0.0626584586012419	-0.0556664201956313	0.00699203840561064	0.950552886027795	0.253108013026557	0.220344022108099	0.00466733355378159	0.999805500558022	FALSE
891	PF3D7_0717200.1o2_8169	-0.10201872004176	-0.0877082091317568	0.0143105109100034	0.934350810483375	0.296931632668174	0.350611304609067	0.00786208528877969	0.999805500558022	FALSE
892	PF3D7_0717300.1o4_7894	-0.0506994074940197	0.0282550138122428	0.0789544213062624	0.711185028402334	0.258725723588498	0.435598216926923	0.0463553914522379	0.999805500558022	FALSE
893	PF3D7_0717500.e1s1_5155	-0.146720611036473	0.0508531505774854	0.197573761613958	0.765961729315911	0.444381970667744	1.37866213172087	0.052951431763055	0.999805500558022	FALSE
894	PF3D7_0717700.e1s1_9221	0.0258930417940148	0.0517422218296037	0.0258491800355889	0.87198487323787	0.236838713431302	0.326821752799524	0.0173401959450948	0.999805500558022	FALSE
895	PF3D7_0718000.e11s1_8030	-0.0524040202301697	0.0714235292730358	0.123827549503205	0.191953096417014	0.295762271944875	0.158944683690573	0.0727107320607581	0.999805500558022	FALSE
896	PF3D7_0718000.e4s1_4866	-0.0622330013058372	0.190750021617542	0.252983022923379	0.388034245480222	0.283625211466466	0.57898193502617	0.127856233947313	0.999805500558022	FALSE
897	PF3D7_0718000.e5s1_8036	-0.0504842688097114	0.11886129634593	0.169345565155641	0.0567562743197904	0.269486739385939	0.139442227183837	0.109273038108643	0.999805500558022	FALSE
898	PF3D7_0718000.e9s3_8251	-0.0254566335849115	0.0205249489356699	0.0459815825205815	0.74727174221327	0.373746501418164	0.269189821977767	0.0210760246066124	0.999805500558022	FALSE
899	PF3D7_0718000.e9s4_5939	-0.0205587738248703	0.0736743575654398	0.09423313139031	0.697366680632195	0.284176495232637	0.495193872219518	0.0499079420097395	0.999805500558022	FALSE
900	PF3D7_0718100.iso1.exon1.amp2_1370	-0.0569319999142575	-0.0335722839944562	0.0233597159198013	0.857787160688997	0.249307814534728	0.259850548618132	0.0155419889805977	0.999805500558022	FALSE
901	PF3D7_0718300.e5s1_8050	-0.0301117327842717	0.092770368801536	0.122882101585808	0.842648884728317	0.337033535291808	1.29262533865681	0.0382543958830729	0.999805500558022	FALSE
902	PF3D7_0718300.e7s1_4783	-0.00552983921707475	0.0178021927743821	0.0233320319914568	0.918197161314832	0.343841616017032	0.462546461518051	0.0108327180672101	0.999805500558022	FALSE
903	PF3D7_0718600.iso1.exon6.amp1_3617	-0.0542126450247244	0.122664508756043	0.176877153780768	0.618290277829815	0.300579218518232	0.726921839239964	0.0790639802499307	0.999805500558022	FALSE
904	PF3D7_0718600.iso1.exon8.amp1_4159	-0.0503947167085215	0.0395161576459891	0.0899108743545106	0.87209071944058	0.172649172264348	1.17022291552839	0.0354531580932121	0.999805500558022	FALSE
905	PF3D7_0718800.iso1.exon4.amp1_3221	-0.0639240486416552	-0.0171156845488838	0.0468083640927714	0.538660155686609	0.257579526672333	0.130094319683936	0.0316243211706711	0.999805500558022	FALSE
906	PF3D7_0719000.1o1_5524	0.00668106820029385	0.139095952485534	0.13241488428524	0.872436386956585	0.223993195640104	1.72864321673514	0.0359611160659575	0.999805500558022	FALSE
907	PF3D7_0719100.iso1.exon2.amp1_947	-0.0651800939522799	0.0368322664387247	0.102012360391005	0.885328627652925	0.457776046261204	1.47654853857344	0.0259726784066938	0.999805500558022	FALSE
908	PF3D7_0719200.e1s1_7415	-0.0211617578910267	-0.0574511158092989	-0.0362893579182721	0.777544688835478	0.280387241461337	0.251063116111985	-0.0218125306211594	0.999805500558022	FALSE
909	PF3D7_0719200.e9s1_8565	-0.128528040202905	-0.0209294000549022	0.107598640148002	0.603677896969853	0.260189683664641	0.419247403657627	0.0635197657013746	0.999805500558022	FALSE
910	PF3D7_0719400.s1_5695	-0.00668097937699862	0.0107607622419231	0.0174417416189217	0.948743627078731	0.201186460901467	0.566023331507235	0.0108655758069525	0.999805500558022	FALSE
911	PF3D7_0719500.1o2_8186	-0.0194184720332647	0.0368279254762495	0.0562463975095142	0.770056803201612	0.358290238994887	0.38345951558238	0.0259553949179566	0.999805500558022	FALSE
912	PF3D7_0719500.2o2_9047	-0.010709814998895	0.0910284374944648	0.10173825249336	0.297927897084151	0.246947069079514	0.177025730286828	0.0705970476589919	0.999805500558022	FALSE
913	PF3D7_0719600.e2_5954	-0.036838181535934	0.0124209988028092	0.0492591803387432	0.633754924608434	0.244788849351263	0.197857474686031	0.0342037981114931	0.999805500558022	FALSE
914	PF3D7_0719700 (renamed)_9040	-0.159984223956845	0.089126767304192	0.249110991261037	0.601529491043099	0.601492275754853	0.964530399633244	0.0636892789769626	0.999805500558022	FALSE
915	PF3D7_0719700.e3s1_7128	-0.0223533703989466	-0.0444624856067293	-0.0221091152077827	0.70341977320438	0.167827040502767	0.106495798445791	-0.0227232775679012	0.999805500558022	FALSE
916	PF3D7_0721000.iso1.exon1.amp1_1958	-0.0960206111983539	-0.178382926362625	-0.0823623151642714	0.935778488042334	0.445838020757919	2.14217422003891	-0.0165667205222998	0.999805500558022	FALSE
917	PF3D7_0721000.iso1.exon1.amp2_2247	-0.137136270013934	-0.200939845128835	-0.0638035751149011	0.941050296273046	0.494411244813885	1.80504894231691	-0.0139714110632696	0.999805500558022	FALSE
918	PF3D7_0721100_5690	-0.0801724792691141	0.169794242053681	0.249966721322795	0.504571397357391	0.36565041578051	0.754844641539409	0.0976136966605322	0.999805500558022	FALSE
919	PF3D7_0721600.e2s1_4856	-0.00294965587810303	0.122859577726944	0.125809233605047	0.625859492406542	0.187252724388394	0.530039065460917	0.0839512079930962	0.999805500558022	FALSE
920	PF3D7_0721700_4819	-0.00515223036084874	0.189678075890565	0.194830306251413	0.230738494130958	0.225064482354421	0.304096356080659	0.138082851281979	0.999805500558022	FALSE
921	PF3D7_0722600.e1s1_6051	-0.0517971177861651	0.104901344171768	0.156698461957933	0.421587399271377	0.287739083143828	0.382209696045909	0.0871389496953683	0.999805500558022	FALSE
922	PF3D7_0722800.1o1_5891	0.0503843499491401	0.371032331134349	0.320647981185209	0.567700231116511	0.514681959483175	1.14128175310677	0.0866716936365979	0.999805500558022	FALSE
923	PF3D7_0723000.iso1.exon1.amp1_3306	-0.0335539413930121	0.080096623529959	0.113650564922971	0.665602787690665	0.409491473238348	0.528634527050425	0.0446334782938139	0.999805500558022	FALSE
924	PF3D7_0723200.e4s1_7754	-0.048266826703086	0.0976908221020334	0.145957648805119	0.176244594976684	0.24578308533844	0.191274185036474	0.101217006510399	0.999805500558022	FALSE
925	PF3D7_0723400.e1s2_6637	-0.102282034564911	0.0943869772890565	0.196669011853968	0.197540960108383	0.507908299908834	0.250025717310167	0.0674366138164019	0.999805500558022	FALSE
926	PF3D7_0723500_4823	-0.018733969408065	0.17171318153203	0.190447150940095	0.443780556751322	0.250455743298034	0.496082973658665	0.110107285010364	0.999805500558022	FALSE
927	PF3D7_0723700.iso1.exon1.amp2_1934	0.0126819463449135	0.0343097390974172	0.0216277927525037	0.826765791605119	0.368178274190786	0.161788953918499	0.0102612419565656	0.999805500558022	FALSE
928	PF3D7_0723800.iso1.exon1.amp3_2230	-0.00568743318732466	-0.178341428099306	-0.172653994911981	0.72288723627448	0.245103303952975	1.01127294003894	-0.0704088069843963	0.999805500558022	FALSE
929	PF3D7_0723800.iso1.exon2.amp1_2646	-0.16418822075629	-0.0241274461513086	0.140060774604981	0.387062140214494	0.519840339284549	0.278893461708697	0.0467946412697232	0.999805500558022	FALSE
930	PF3D7_0723900.e1s2_5176	-0.0171004608047944	0.213485000839661	0.230585461644456	0.711945385056751	0.176152690108451	1.2989329235502	0.0828722778119629	0.999805500558022	FALSE
931	PF3D7_0724300.iso1.exon1.amp1_112	-0.0511358247770826	0.0910133929386035	0.142149217715686	0.533526086777659	0.190116676839617	0.463281605680531	0.100136408716592	0.999805500558022	FALSE
932	PF3D7_0724400.iso1.exon1.amp1_2105	-0.0118966276918922	-0.0527789151175565	-0.0408822874256643	0.44485923990101	0.229325917140854	0.0757592257760098	-0.0313014735112538	0.999805500558022	FALSE
933	PF3D7_0724700.e2s2_8380	-0.136302069456003	0.0174590791065981	0.153761148562601	0.462533808901968	0.599691244490091	0.377821583047566	0.0442413677776078	0.999805500558022	FALSE
934	PF3D7_0725100.e1s1_5471	-0.0677588122933147	-0.0172645181215589	0.0504942941717557	0.811975034710944	0.261114575297703	0.435631307176981	0.0294444398919856	0.999805500558022	FALSE
935	PF3D7_0725200.iso1.exon3.amp1_3844	-0.0601550011392441	0.0141321971732381	0.0742871983124822	0.170494803547023	0.153804067972681	0.0924514850671163	0.0835177404720292	0.999805500558022	FALSE
936	PF3D7_0726100.2o2_6782	0.0318289625760384	0.0780476358677742	0.0462186732917358	0.775965575146793	0.195740690284401	0.333058044174663	0.0357675247209077	0.999805500558022	FALSE
937	PF3D7_0726200.iso1.exon2.amp1_1023	-0.017659677230873	0.0883077400436548	0.105967417274528	0.705736174812186	0.237638896676168	0.57878656760554	0.0597334978436941	0.999805500558022	FALSE
938	PF3D7_0726400.e1s1_6882	-0.011240224330727	-0.00943853069759086	0.00180169363313611	0.968707071540804	0.227641275581885	0.0502337404775703	0.00139488109548796	0.999805500558022	FALSE
939	PF3D7_0726400.e1s3_8538	-0.0624063721614134	0.0402028233069242	0.102609195468338	0.651627317237241	0.335391772773332	0.457921782234645	0.0487050885217352	0.999805500558022	FALSE
940	PF3D7_0726400.e2s1_8610	-0.0391398067126128	0.0137897304486952	0.052929537161308	0.654537039214891	0.234015541247273	0.232624906990965	0.0377214376479105	0.999805500558022	FALSE
941	PF3D7_0726400.e2s2_9247	0.0384336714792264	-0.0163159039084075	-0.0547495753876339	0.76311545453574	0.255176088890332	0.369657107649912	-0.0337583640797129	0.999805500558022	FALSE
942	PF3D7_0726400.e3s1_8933	-0.0731240050243125	0.0949085999875184	0.168032605011831	0.266545380921956	0.351250898157063	0.275548551023384	0.0814907396240387	0.999805500558022	FALSE
943	PF3D7_0726400.e6s1_8651	-0.0586404286825532	0.0476331553985109	0.106273584081064	0.395784712390084	0.493310672439565	0.191804203798115	0.0377280844927521	0.999805500558022	FALSE
944	PF3D7_0726400.e6s2_4899	0.0399725659092216	0.340503514003152	0.30053094809393	0.389432075569871	0.457834815788547	0.684091365920952	0.102602378366672	0.999805500558022	FALSE
945	PF3D7_0726500.iso1.exon4.amp1_3386	-0.0299819437325873	0.0140176932218228	0.0439996369544101	0.665776998070793	0.331505833260365	0.178568944797054	0.02304870911181	0.999805500558022	FALSE
946	PF3D7_0726500.iso1.exon4.amp2_2525	-0.0083713658111954	0.113659069326292	0.122030435137487	0.338581613799586	0.255714796869486	0.24049426644198	0.0800508254134291	0.999805500558022	FALSE
947	PF3D7_0726600.1o2_6479	-0.141264303023108	-0.123749802266446	0.0175145007566615	0.935760618778513	0.533456782993374	0.41781396351383	0.00559345791982402	0.999805500558022	FALSE
948	PF3D7_0727000.iso1.exon1.amp1_1996	-0.0134040238907709	0.0630202863046126	0.0764243101953835	0.32754023487565	0.120789334148207	0.149707251403876	0.102444069140996	0.999805500558022	FALSE
949	PF3D7_0727200.1o1_6756	0.00589347837142753	0.197447526037573	0.191554047666145	0.278658799626718	0.250792662510967	0.335974387650214	0.122025833458968	0.999805500558022	FALSE
950	PF3D7_0727800.iso1.exon1.amp1_4594	-0.0271472462889836	0.0376317940983114	0.064779040387295	0.848127615503773	0.302731637107499	0.701787953112161	0.0292560937950921	0.999805500558022	FALSE
951	PF3D7_0727900.e1s2_5080	-0.0733504912187426	0.09111794970933	0.164468440928073	0.245552390397925	0.333386438912953	0.256083123681601	0.0841603601838275	0.999805500558022	FALSE
952	PF3D7_0728000.e2_6530	-0.15879520969797	0.0519413339730633	0.210736543671033	0.18002024410877	0.404580112316646	0.274296167495452	0.0895424644497219	0.999805500558022	FALSE
953	PF3D7_0728200.2o2_7918	0.0566123223162153	0.206456202780648	0.149843880464433	0.854278800741359	0.467193898093502	1.70360403619674	0.034750092889357	0.999805500558022	FALSE
954	PF3D7_0728300.iso1.exon1.amp1_984	-0.0101485304630835	-0.0368819877584972	-0.0267334572954137	0.722512955867008	0.159755039428299	0.147367016637525	-0.0281239441377427	0.999805500558022	FALSE
955	PF3D7_0728600.iso1.exon1.amp1_205	-0.067085703635173	0.0563809203147471	0.12346662394992	0.0885661141419528	0.229158074131839	0.11552340820055	0.0937666823506809	0.999805500558022	FALSE
956	PF3D7_0728600.iso1.exon3.amp1_2396	0.15465170706863	0.251935318003719	0.0972836109350893	0.492366045209971	0.688582839800946	0.161317562481859	0.0248899387749144	0.999805500558022	FALSE
957	PF3D7_0728700.iso1.exon3.amp1_1258	-0.0975079083966116	0.021853596081213	0.119361504477825	0.434456487941397	0.240004353790469	0.298943035307299	0.0804600773311502	0.999805500558022	FALSE
958	PF3D7_0728800.iso1.exon1.amp1_4481	0.0095063466474923	0.0434964991061388	0.0339901524586465	0.960539694533802	0.238313264181921	1.44148022530762	0.0106800473206163	0.999805500558022	FALSE
959	PF3D7_0729500.iso1.exon1.amp1_1884	-0.0502000422001435	0.0131648712122253	0.0633649134123688	0.812810983007308	0.201698097584543	0.556151170336592	0.039766163737857	0.999805500558022	FALSE
960	PF3D7_0729700.iso1.exon2.amp1_1872	-0.023309698246239	-0.0678068246902281	-0.0444971264439892	0.704763143050355	0.22089209693008	0.232991062839423	-0.0333658285314619	0.999805500558022	FALSE
961	PF3D7_0729800.iso1.exon1.amp1_365	-0.0761365483910166	-0.0344806323374051	0.0416559160536114	0.570122728503475	0.278879332696908	0.117213456587313	0.0261181592587911	0.999805500558022	FALSE
962	PF3D7_0729900.e1s1_5072	-0.0157595422581518	0.169001629185196	0.184761171443348	0.450031143147529	0.216070058978119	0.489760710435594	0.117957212995629	0.999805500558022	FALSE
963	PF3D7_0730000.iso1.exon1.amp1_348	-0.0450965295778349	-0.0166960769212835	0.0284004526565514	0.839682683974859	0.182232158556441	0.287724654738318	0.0240559530791954	0.999805500558022	FALSE
964	PF3D7_0730300.e1s1_5186	-0.114094290332619	-0.0491952630796941	0.0648990272529248	0.638512684636703	0.591914292151283	0.197873974503058	0.0192482833292122	0.999805500558022	FALSE
965	PF3D7_0730300.e1s2_5758	0.0115139286298195	-0.106264476904481	-0.117778405534301	0.728889951783205	0.41789086394264	0.694539604168276	-0.0429556782530145	0.999805500558022	FALSE
966	PF3D7_0730500.e1s3_7387	0.00729182046950492	-0.0238672546419718	-0.0311590751114767	0.913708713806528	0.210673894223465	0.599669922595131	-0.0184289757659624	0.999805500558022	FALSE
967	PF3D7_0730800.1.e2s1_5161	0.0197829373542632	-0.077149230656455	-0.0969321680107182	0.88086945385715	0.41015146909898	1.35027148697815	-0.0272254437598222	0.999805500558022	FALSE
968	PF3D7_0730800.iso2.exon2.amp1_1557	-0.0410462820473972	0.139646228856865	0.180692510904262	0.753543958077913	0.155918121722576	1.20029986419774	0.070651967409211	0.999805500558022	FALSE
969	PF3D7_0730900.e1s1_8316	-0.0394561503548543	-0.130041569460198	-0.0905854191053442	0.6352043272096	0.39505857862497	0.372954698953213	-0.0384490766155633	0.999805500558022	FALSE
970	PF3D7_0730900.e2s1_8659	-0.0832217471805906	-0.0136102824349649	0.0696114647456257	0.516203113041903	0.222594934533878	0.207063759420968	0.0525155898226595	0.999805500558022	FALSE
971	PF3D7_0731100.2o2_6789	-0.0145347296870616	0.0437799208258902	0.0583146505129517	0.8315324723058	0.319045428464324	0.564184687518763	0.027397110071316	0.999805500558022	FALSE
972	PF3D7_0731200.2o2_8439	-0.0539201366141563	0.0185512069443053	0.0724713435584617	0.92517597761528	0.423092973218306	1.61460959347424	0.0180300953017999	0.999805500558022	FALSE
973	PF3D7_0731500.s1 (renamed)_7684	0.0972016868784081	0.0847991890393423	-0.0124024978390658	0.961845045088676	0.395785527809643	0.527840981708678	-0.0050104897357295	0.999805500558022	FALSE
974	PF3D7_0731500.s2 (renamed)_7112	-0.00482057050500949	-0.00750974626254113	-0.00268917575753164	0.996696617994489	0.195966398951823	1.3636119147872	-0.000913468971613184	0.999805500558022	FALSE
975	PF3D7_0731600.e1s1_6357	-0.0265239279132757	0.148313814667294	0.17483774258057	0.812114226781609	0.137851766062837	1.53928846473746	0.0550530526266953	0.999805500558022	FALSE
976	PF3D7_0732000.iso1.exon2.amp1_690	-0.114360140692655	0.0981634802706665	0.212523620963322	0.518983220377642	0.451224376178099	0.657835254500236	0.0740078300664746	0.999805500558022	FALSE
977	PF3D7_0732200.iso1.exon2.amp1_1297	-0.171942080512895	0.206577486880287	0.378519567393182	0.163591024607158	0.722614435625023	0.468378825667078	0.0902593847979497	0.999805500558022	FALSE
978	PF3D7_0732300.iso1.exon1.amp1_4175	-0.0172308069327299	0.0190799651773688	0.0363107721100986	0.844058515724911	0.889052240409712	0.217821715142036	0.00719299825356145	0.999805500558022	FALSE
979	PF3D7_0732400.iso1.exon1.amp1_2443	-0.0800074036273124	0.0153348237153732	0.0953422273426857	0.742716671415906	0.322739817703197	0.596337106985776	0.0437201419326871	0.999805500558022	FALSE
980	PF3D7_0732500.iso1.exon1.amp1_135	-0.0528151907528796	0.152625071413122	0.205440262166002	0.681864264492278	0.163550038910117	1.03981480046678	0.0902581691630499	0.999805500558022	FALSE
981	PF3D7_0732700.iso1.exon2.amp1_712	-0.120502381056369	0.161396556674273	0.281898937730642	0.641455076284319	0.60285792247453	1.2379571165587	0.0668913622493916	0.999805500558022	FALSE
982	PF3D7_0732900.iso1.exon2.amp1_996	-0.0112523190664241	0.0768328387220166	0.0880851577884407	0.825698974518956	0.495829100469742	0.821037598340945	0.0271018440495966	0.999805500558022	FALSE
983	PF3D7_0733000.iso1.exon1.amp1_3621	-0.147422902736266	0.118741938959283	0.266164841695548	0.0154768494011099	0.332869833611729	0.159998472864462	0.13935384585233	0.999805500558022	FALSE
984	PF3D7_0733000.iso1.exon2.amp3_1942	-0.0413091766275431	-0.0386288923245015	0.00268028430304162	0.994246994090669	0.229091576149036	0.777444486276824	0.00132416093782628	0.999805500558022	FALSE
985	PF3D7_0800100.iso1.exon1.amp1_723	-0.151626848928092	0.132624047135947	0.284250896064039	0.0123534323501201	0.383144574476299	0.159660672940944	0.129748155648862	0.999805500558022	FALSE
986	PF3D7_0800100.iso1.exon2.amp1_3980	-0.0532925163059277	0.0326646460703611	0.0859571623762888	0.398881335040886	0.135259655442871	0.199882931963319	0.0995700331311311	0.999805500558022	FALSE
987	PF3D7_0800100.iso1.exon2.amp2_4269	0.00769801552646671	-0.0218274074070113	-0.029525422933478	0.921213080772481	0.147914149947868	0.625028125509302	-0.019628056255622	0.999805500558022	FALSE
988	PF3D7_0800200.e1s1_8827	-0.0631653498986648	0.124088588175681	0.187253938074345	0.653700086969999	0.195329170691008	0.862802333465271	0.0913855480171545	0.999805500558022	FALSE
989	PF3D7_0800200.e1s2_5359	-0.013942944096377	0.0880120878980716	0.101955031994449	0.713167692034608	0.296679551934976	0.569103117370265	0.0502777820641896	0.999805500558022	FALSE
990	PF3D7_0800200.e2s1_5745	0.0293689450565994	0.173057517933713	0.143688572877113	0.41579570715838	0.352098810104405	0.337989567307775	0.0683139914380738	0.999805500558022	FALSE
991	PF3D7_0800300.e1s3_8831	-0.0971115605092084	-0.0673254955550288	0.0297860649541796	0.864425226424135	0.305884898498374	0.350804519698092	0.0159524510529346	0.999805500558022	FALSE
992	PF3D7_0800300.e2s1_8914	-0.0106193615368134	0.111837865999422	0.122457227536236	0.135700070582733	0.383935281234963	0.096703576763575	0.0561611771003019	0.999805500558022	FALSE
993	PF3D7_0800400.iso1.exon3.amp1_128	-0.0854430542782209	0.116378882066306	0.201821936344527	0.449253028271442	0.360764041698668	0.527485456326709	0.0878501459457689	0.999805500558022	FALSE
994	PF3D7_0800500.iso1.exon2.amp1_3888	-0.118865418195131	0.010373645485754	0.129239063680885	0.734821088175563	0.510639178109859	0.777197891438991	0.0393988173112826	0.999805500558022	FALSE
995	PF3D7_0800700.e1s1_6606	-0.0395370575397581	0.0366897692487576	0.0762268267885158	0.39851252882465	0.245927677310738	0.163839950549587	0.0533335488334528	0.999805500558022	FALSE
996	PF3D7_0800700.e3s1_5772	-0.00961600279671321	0.0657935516175918	0.075409554414305	0.782540421668089	0.206711045314583	0.567044716443145	0.046293147593881	0.999805500558022	FALSE
997	PF3D7_0801000.e2s1_5460	-0.0247725636244188	-0.0344955779299252	-0.00972301430550639	0.977243364594045	0.258872785279392	0.710995577161162	-0.00476335565104826	0.999805500558022	FALSE
998	PF3D7_0801000.e2s2_6911	0.0289431596754054	-0.000759764966592868	-0.0297029246419983	0.690369483970465	0.280952242404619	0.120622590639268	-0.0184775842363657	0.999805500558022	FALSE
999	PF3D7_0801600.1o1_8124	-0.114259001495091	-0.01937131227774	0.0948876892173509	0.531831874071116	0.337949389476641	0.290801723203035	0.0474855561728184	0.999805500558022	FALSE
1000	PF3D7_0801700.1o3_5645	-0.0196433855021928	0.00827391581771444	0.0279173013199072	0.933528718422907	0.162321822900297	0.701041569699159	0.0166570740335394	0.999805500558022	FALSE
1001	PF3D7_0801800_4835	-0.0166580678881024	-0.0448980004608753	-0.028239932572773	0.895378066392195	0.358751428111998	0.433940919283078	-0.0127944998192875	0.999805500558022	FALSE
1002	PF3D7_0801900.iso1.exon1.amp5_1622	-0.0387375845312261	0.00478112827870163	0.0435187128099277	0.569540032837402	0.328595639787042	0.108948415096355	0.0232528228438147	0.999805500558022	FALSE
1003	PF3D7_0802000.e1s1_5197	-0.112992779739309	0.179339321697606	0.292332101436915	0.556647919112291	0.390685353720533	1.01296654196613	0.0975051219223269	0.999805500558022	FALSE
1004	PF3D7_0802000.e1s2_6642	-0.00793121822925635	0.0383677772779784	0.0462989955072347	0.898231142922036	0.370905584781369	0.749564872215182	0.0179544387163935	0.999805500558022	FALSE
1005	PF3D7_0802300.iso1.exon1.amp1_1413	-0.0471948236829115	0.159521268145984	0.206716091828896	0.57248858823361	0.286994898685841	0.747436786589263	0.0936685280787034	0.999805500558022	FALSE
1006	PF3D7_0802300.iso1.exon1.amp2_1927	0.0202288894504712	0.252074449470842	0.23184556002037	0.288254738050506	0.241793711992656	0.419202251421001	0.144515147038545	0.999805500558022	FALSE
1007	PF3D7_0802600.iso1.exon3.amp1_1656	-0.0146401532343905	-0.0504306844607957	-0.0357905312264051	0.923530508026726	0.101328733811218	0.782468969331277	-0.0214750401770359	0.999805500558022	FALSE
1008	PF3D7_0802600.iso1.exon6.amp1_2681	0.010723005269811	0.0207610900495421	0.0100380847797311	0.912673398326774	0.151825178209331	0.185123263443628	0.0107329378457443	0.999805500558022	FALSE
1009	PF3D7_0802800.2o2_8482	-0.0528564772483287	0.00103562133618418	0.0538920985845129	0.881976722040477	0.322536521920532	0.753966269845004	0.0227678476925186	0.999805500558022	FALSE
1010	PF3D7_0803200.iso1.exon1.amp1_3327	-0.0392702216472003	-0.0663852297713511	-0.0271150081241508	0.908552613832016	0.183269763026832	0.491820456317207	-0.0189733348675405	0.999805500558022	FALSE
1011	PF3D7_0803400.iso1.exon1.amp1_4581	-0.139675466991522	-0.108056185967547	0.0316192810239749	0.967799451303774	0.518012308599041	1.63674743353371	0.00719688738504935	0.999805500558022	FALSE
1012	PF3D7_0803400.iso1.exon1.amp2_3948	-0.138606700193926	0.0365268608248648	0.175133561018791	0.290637296737017	0.414932689849806	0.30017147608144	0.0722864399765928	0.999805500558022	FALSE
1013	PF3D7_0804000.iso1.exon1.amp1_4456	-0.0407142103210138	0.1483581593829	0.189072369703914	0.519582711985155	0.332629137022833	0.590465240557451	0.0851095104485085	0.999805500558022	FALSE
1014	PF3D7_0804000.iso1.exon2.amp1_3276	-0.0133469615793706	0.0273728256947116	0.0407197872740822	0.545040738668642	0.243047205339648	0.111038838904248	0.029237961839053	0.999805500558022	FALSE
1015	PF3D7_0804500.e1s1_5404	-0.0817635393165311	0.103059457864141	0.184822997180672	0.529398659291758	0.340397212621182	0.591336589275907	0.0817883804973157	0.999805500558022	FALSE
1016	PF3D7_0804500.e2s2_5372	-0.0508494559402682	0.0717501071656443	0.122599563105912	0.556552565413028	0.250336624967123	0.420412750773558	0.0744412888990987	0.999805500558022	FALSE
1017	PF3D7_0804500.e2s3_4800	0.00504930379843919	-0.0294014235476585	-0.0344507273460977	0.675201169077713	0.25726045657817	0.146521897724157	-0.0232070169324002	0.999805500558022	FALSE
1018	PF3D7_0804500.e3_7398	-0.0447540687300548	0.0278353860410835	0.0725894547711383	0.713765203358914	0.346101452485129	0.395556807407819	0.0343758813371722	0.999805500558022	FALSE
1019	PF3D7_0804600.1o1_6746	-0.083111231612609	-0.0916900501898343	-0.00857881857722531	0.982459653890331	0.499363400494954	0.802313490265013	-0.00264064049071047	0.999805500558022	FALSE
1020	PF3D7_0804800.e1s1_5442	-0.061752787444657	-0.0574042633981286	0.0043485240465284	0.963877304924818	0.226624282310805	0.186054805941533	0.00325758217390685	0.999805500558022	FALSE
1021	PF3D7_0804900.1o1_6159	-0.142798402553686	-0.127508530422725	0.0152898721309605	0.925678473788516	0.453742841448196	0.306313651523486	0.0057941317910269	0.999805500558022	FALSE
1022	PF3D7_0805100.iso1.exon1.amp1_3626	-0.0481693985601679	-0.0184408457747082	0.0297285527854596	0.710474887570255	0.173879574505114	0.15615438881561	0.0288066806874628	0.999805500558022	FALSE
1023	PF3D7_0805300.iso1.exon1.amp2_1057	-0.0123377511405347	-0.0931288974135107	-0.080791146272976	0.823570232925137	0.129525685492792	0.757784288608314	-0.047993064435971	0.999805500558022	FALSE
1024	PF3D7_0805400.1o6_8716	-0.0537828255243593	0.0751906530627245	0.128973478587084	0.68846280056055	0.252877880530828	0.663444811951608	0.0661016023433578	0.999805500558022	FALSE
1025	PF3D7_0805700.iso1.exon1.amp2_3399	-0.0271089237518694	0.0937102797752967	0.120819203527166	0.196532778708538	0.309369380826214	0.153597306281808	0.067997646041067	0.999805500558022	FALSE
1026	PF3D7_0806000.iso1.exon1.amp2_515	-0.106158049801227	0.117585650191976	0.223743699993203	0.824272616978484	0.520094745304751	2.1034303184291	0.0435843521521653	0.999805500558022	FALSE
1027	PF3D7_0806200.10o10_8244	-0.0962525315242839	0.192760585873967	0.289013117398251	0.311535854070012	0.27621043646214	0.553685809158501	0.150912509922106	0.999805500558022	FALSE
1028	PF3D7_0806300.iso1.exon1.amp1_485	-0.0692990227935653	0.0768560001712231	0.146155022964788	0.226208896068902	0.321134047211409	0.212744271035463	0.0783348584427578	0.999805500558022	FALSE
1029	PF3D7_0806300.iso1.exon2.amp1_3830	0.063654221127239	0.0651317829528949	0.00147756182565592	0.991554210248278	0.511323920892656	0.231521449181435	0.000504405494569579	0.999805500558022	FALSE
1030	PF3D7_0806500.e1s1_5475	-0.0104253235682085	-0.129888180795851	-0.119462857227643	0.772512881304824	0.28479772004482	0.858319928976033	-0.0507440785015212	0.999805500558022	FALSE
1031	PF3D7_0806600.e2s1_5153	-0.0692767964334072	0.0754524605361304	0.144729256969538	0.31690034719838	0.21890101298598	0.276921430688166	0.106692726665733	0.999805500558022	FALSE
1032	PF3D7_0806600.e3s1_8038	-0.0265730727724359	0.0122535291579407	0.0388266019303766	0.928685247628977	0.262958600470208	0.906972185611187	0.0165510468390208	0.999805500558022	FALSE
1033	PF3D7_0806600.e5s1_5749	0.0173406795856444	-0.132310980559789	-0.149651660145434	0.398690093112427	0.190149712035797	0.350250460978568	-0.11658413882475	0.999805500558022	FALSE
1034	PF3D7_0806700.iso1.exon1.amp1_1804	-0.120848578986125	-0.0423630354174527	0.0784855435686726	0.354563151189249	0.308995564145519	0.136683872938506	0.0443624097546089	0.999805500558022	FALSE
1035	PF3D7_0806700.iso1.exon3.amp3_1358	-0.0159574610217198	-0.0393017758535766	-0.0233443148318568	0.852310760052483	0.157214402790491	0.257492117282471	-0.0227154799503124	0.999805500558022	FALSE
1036	PF3D7_0806800.e1s1_8932	-0.0422706478976703	0.312270788602592	0.354541436500262	0.50759118112584	0.296883576150225	1.08692045403427	0.129064522918549	0.999805500558022	FALSE
1037	PF3D7_0806900.iso1.exon1.amp1_704	-0.0470594167684008	0.217781378111873	0.264840794880274	0.284988695762959	0.223718113853864	0.47690740633409	0.167120886934845	0.999805500558022	FALSE
1038	PF3D7_0807100.iso1.exon1.amp2_3363	-0.033587562421613	-0.104388879247536	-0.0708013168259235	0.825561169970815	0.21946866526142	0.66889432447624	-0.0387930215290131	0.999805500558022	FALSE
1039	PF3D7_0807700.1o5_5328	-0.00164757973364723	0.0929688125838453	0.0946163923174925	0.360394327137547	0.207051331280932	0.196007786806409	0.0766049467808216	0.999805500558022	FALSE
1040	PF3D7_0807700.5o5_5617	-0.0602700820331938	0.181897113086381	0.242167195119575	0.55079393563365	0.193439498862505	0.830115860647355	0.121789399110071	0.999805500558022	FALSE
1041	PF3D7_0807800.e2s1_6602	-0.158603070269803	-0.0362083589339186	0.122394711335884	0.707831174084875	0.451241694286249	0.663089727419105	0.0425490769558062	0.999805500558022	FALSE
1042	PF3D7_0808100.iso1.exon2.amp1_3829	-0.0499553123080935	-0.0167429992119207	0.0332123130961728	0.781742801175427	0.239498020939259	0.237149722493971	0.0231375451572372	0.999805500558022	FALSE
1043	PF3D7_0808100.iso1.exon3.amp1_3963	-0.140262100363666	0.0639847733519051	0.204246873715571	0.0873739198391865	0.344601332455707	0.194579818577897	0.102748927425819	0.999805500558022	FALSE
1044	PF3D7_0808200.e1s1_9217	-0.00477269316155576	0.0515634681748327	0.0563361613363885	0.825426297722454	0.419846406465991	0.515785286314797	0.0217567496052838	0.999805500558022	FALSE
1045	PF3D7_0808400.1o1_4673	-0.0206815358812221	-0.174330574914031	-0.153649039032809	0.228554713660877	0.322908699331662	0.227003666243726	-0.0816316855618828	0.999805500558022	FALSE
1046	PF3D7_0808600.e1s2_6520	-0.0202295119430011	0.196589416384063	0.216818928327064	0.0606371944557994	0.171543501440644	0.189966531479098	0.208055187604632	0.999805500558022	FALSE
1047	PF3D7_0808600.e2s1_8343	-0.119406940784072	0.0114122500428337	0.130819190826906	0.40886046165274	0.312606435455499	0.303171929387055	0.0699779823900971	0.999805500558022	FALSE
1048	PF3D7_0808700.iso1.exon1.amp1_3035	-0.134182992394337	0.0513518814428799	0.185534873837217	0.40885225542423	0.459518292132479	0.428306350017434	0.0677892963283342	0.999805500558022	FALSE
1049	PF3D7_0808700.iso1.exon2.amp1_2238	-0.0262083535410541	-0.0376580682827811	-0.011449714741727	0.86204429773631	0.174687644224922	0.124392013405969	-0.011236025012765	0.999805500558022	FALSE
1050	PF3D7_0808800.iso1.exon1.amp1_3594	-0.170125476869022	0.0693376400922848	0.239463116961307	0.743153426458847	0.403543537526554	1.51874051914281	0.0630222675129548	0.999805500558022	FALSE
1051	PF3D7_0808900.iso1.exon1.amp1_4458	-0.0868261431265047	-0.073605226977039	0.0132209161494657	0.981926098039616	0.365188070244939	1.22033403369683	0.00413467583117844	0.999805500558022	FALSE
1052	PF3D7_0809100.iso1.exon1.amp1_4184	-0.0846547682992304	0.0783551812341116	0.163009949533342	0.0770275662904951	0.362766862369105	0.131297203692039	0.0787924588123914	0.999805500558022	FALSE
1053	PF3D7_0809100.iso1.exon2.amp1_1077	-0.0116431466558712	0.0687701289143501	0.0804132755702213	0.567726044649032	0.194977246954192	0.282358929150128	0.0648953872924929	0.999805500558022	FALSE
1054	PF3D7_0809100.iso1.exon2.amp2_seg2_2600	-0.0226455514316333	0.179585023401293	0.202230574832926	0.184013182042539	0.133979425372094	0.280911569499316	0.214356658266707	0.999805500558022	FALSE
1055	PF3D7_0809200.e1s2_6342	-0.131455383794554	0.0865178471704642	0.217973230965018	0.538131853048464	0.543792771166983	0.704013347183398	0.0644302764892315	0.999805500558022	FALSE
1056	PF3D7_0809500.iso1.exon1.amp1_3552	-0.0274748131263753	0.0394073707655494	0.0668821838919247	0.396543272525554	0.290209966499856	0.127090282006256	0.0402604871057033	0.999805500558022	FALSE
1057	PF3D7_0809600.iso1.exon1.amp4_seg1_2308	0.0148004431369016	-0.0139824762218488	-0.0287829193587505	0.88403511832464	0.431131812416061	0.386907116192085	-0.0112491852582278	0.999805500558022	FALSE
1058	PF3D7_0809900.iso1.exon1.amp1_seg2_287	-0.146914903091208	0.0710524116189475	0.217967314710156	0.149929593143556	0.587341646965606	0.224890316076204	0.0650102972210883	0.999805500558022	FALSE
1059	PF3D7_0809900.iso1.exon1.amp2_seg2_576	-0.14782016399795	-0.0058225457363374	0.141997618261613	0.515736653863352	0.568918569411924	0.406245291222332	0.0427798229468806	0.999805500558022	FALSE
1060	PF3D7_0810300.2o4_8207	-0.0461227296929153	0.0643578139678404	0.110480543660756	0.719325701659822	0.254543836283559	0.634875495910147	0.057547963074527	0.999805500558022	FALSE
1061	PF3D7_0810800.e2s1_9231	-0.0462261051832534	0.122571380646595	0.168797485829849	0.533863216453429	0.346312742486492	0.544314550755754	0.0753158498593984	0.999805500558022	FALSE
1062	PF3D7_0810900.1.1o2_7001	-0.0268667105333531	0.137010154170548	0.163876864703902	0.0574806271096754	0.228096088222638	0.138587516489601	0.12417350047302	0.999805500558022	FALSE
1063	PF3D7_0811600.e2s1_6045	-0.0101986859273397	0.0686033190457277	0.0788020049730673	0.597842943815741	0.183553914477018	0.302250137258919	0.065587181499104	0.999805500558022	FALSE
1064	PF3D7_0811600.e2s2_7207	-0.0940266243278383	0.197464916100686	0.291491540428524	0.615335027028762	0.29912055081914	1.19425693248585	0.0995824332433908	0.999805500558022	FALSE
1065	PF3D7_0812100.e1s1_5364	-0.0519298175084373	0.134688789479506	0.186618606987943	0.400457361687742	0.372872534484802	0.430070841030107	0.0819249270659982	0.999805500558022	FALSE
1066	PF3D7_0812400.e1s1_6614	-0.0664975210300496	0.11814888170501	0.18464640273506	0.236851316828922	0.280646979126146	0.289033865906648	0.109287511167928	0.999805500558022	FALSE
1067	PF3D7_0812600.iso1.exon2.amp1_4140	0.0379909895392318	0.0432665517025324	0.0052755621633006	0.956029206889222	0.281513526042592	0.175620181432196	0.00323504056655357	0.999805500558022	FALSE
1068	PF3D7_0812700.1o1_7561	-0.00962493078657195	0.0539827423669475	0.0636076731535195	0.570503871499612	0.234024512731129	0.217576134008816	0.0456451059720984	0.999805500558022	FALSE
1069	PF3D7_0812900.2o2_8824	-0.0210707819701292	-0.0264343862224383	-0.00536360425230903	0.967394051003002	0.194242020372355	0.267685536619749	-0.00438817755159055	0.999805500558022	FALSE
1070	PF3D7_0813400.e2s1_6043	-0.0843346699372597	-0.0311380259618396	0.0531966439754202	0.867526263477442	0.500944801113967	0.647031895365831	0.0170761328015327	0.999805500558022	FALSE
1071	PF3D7_0813700.iso1.exon1.amp2_2781	-0.0544955205896626	0.156744689309577	0.21124020989924	0.0268016380260823	0.300340892062299	0.142080736225524	0.122629825905274	0.999805500558022	FALSE
1072	PF3D7_0813900.e2s1_8892	-0.042230163841906	-0.00354721831272506	0.0386829455291809	0.540989565182508	0.282844722211257	0.0851817635259773	0.024040775301317	0.999805500558022	FALSE
1073	PF3D7_0814600.e1s1_5462	-0.0889542206777494	0.184211412323236	0.273165633000985	0.16863140564952	0.421556925805436	0.352965373489904	0.109838322689372	0.999805500558022	FALSE
1074	PF3D7_0815100.iso1.exon1.amp1_2474	-0.00853559439798276	0.00693312779895301	0.0154687221969358	0.925873072914921	0.281473415094608	0.335771165157174	0.00895141986213419	0.999805500558022	FALSE
1075	PF3D7_0815300.iso1.exon1.amp1_4308	0.00340278984230738	0.0664906420902785	0.0630878522479711	0.42471968595074	0.229309038194748	0.141532075432411	0.0475168849913702	0.999805500558022	FALSE
1076	PF3D7_0815300.iso1.exon1.amp2_seg1_2595	-0.03194709544585	0.0438650401105416	0.0758121355563916	0.508882407686127	0.300947016999998	0.212918754721049	0.0432011363408502	0.999805500558022	FALSE
1077	PF3D7_0815400.e1s1_8889	-0.0273029389040313	0.0384614289703677	0.065764367874399	0.529975556772464	0.266445824292036	0.195943539774603	0.042228166600451	0.999805500558022	FALSE
1078	PF3D7_0815500.3o5_7032	-0.0703010540863848	0.00229007026816319	0.072591124354548	0.772747863453445	0.384209555818156	0.50918252469061	0.0302441731856629	0.999805500558022	FALSE
1079	PF3D7_0816100.1o4_7264	-0.08421196134545	0.131031243075417	0.215243204420867	0.180968599763062	0.407387838436139	0.281632219960321	0.0907291669986715	0.999805500558022	FALSE
1080	PF3D7_0816200.1o1_6682	-0.104513881956664	-0.125630644411481	-0.0211167624548163	0.96228069000055	0.416193889508384	0.927683102847535	-0.00704466100413959	0.999805500558022	FALSE
1081	PF3D7_0816500.e2s1_4845	0.021009675169699	-0.0220560865863465	-0.0430657617560456	0.615155829148069	0.14304949241221	0.170663210780943	-0.0490358262400718	0.999805500558022	FALSE
1082	PF3D7_0816600.e1s1_6325	-0.023550582124901	0.138041571248899	0.1615921533738	0.337112802646272	0.209274351447747	0.326608761434961	0.119512544241162	0.999805500558022	FALSE
1083	PF3D7_0816700.iso1.exon3.amp1_4095	-0.109237343372704	-0.0933838648291467	0.0158534785435571	0.914132883827024	0.447747628099467	0.266595915156855	0.00612492162021404	0.999805500558022	FALSE
1084	PF3D7_0817300.e1s3_7500	-0.0244602521493105	0.240067990539801	0.264528242689111	0.349302285670748	0.587781351302364	0.532136670864329	0.0757706840580663	0.999805500558022	FALSE
1085	PF3D7_0817700.iso1.exon14.amp1_1790	-0.120657516628189	0.035389767674171	0.15604728430236	0.411770081338982	0.350887117078573	0.366403455581744	0.0737509116825759	0.999805500558022	FALSE
1086	PF3D7_0817700.iso1.exon15.amp1_2691	-0.0442993476928949	0.0215022131168844	0.0658015608097793	0.534431768054631	0.220240122513258	0.204901301646711	0.050171455845553	0.999805500558022	FALSE
1087	PF3D7_0818500.e2_5381	-0.0594220616146751	0.0429137344948373	0.102335796109512	0.786072108148218	0.449864129180206	0.773886265742832	0.034357729728649	0.999805500558022	FALSE
1088	PF3D7_0818900_4784	-0.00181424182541004	0.173382765234936	0.175197007060346	0.531069682526536	0.410871108748628	0.557154116594872	0.0679703570113137	0.999805500558022	FALSE
1089	PF3D7_0819600.2o2_6409	-0.0387456610429596	0.0320860127434447	0.0708316737864042	0.412172174440447	0.328082380475115	0.136414626940218	0.0377595596233338	0.999805500558022	FALSE
1090	PF3D7_0819800.e4s1_8607	-0.0828468826366411	-0.395532545318176	-0.312685662681535	0.0836564357176602	0.222787254807063	0.306687068505201	-0.223089758140267	0.999805500558022	FALSE
1091	PF3D7_0820600.3o3_6147	-0.0855778928488276	-0.0864782414224503	-0.000900348573622714	0.992449861608983	0.244599179246175	0.181206152438202	-0.000629466195710475	0.999805500558022	FALSE
1092	PF3D7_0821000.1o5_7907	0.00412133276524574	0.0200238918112664	0.0159025590460206	0.872710196859052	0.272828512647379	0.185698047075204	0.0100179334117515	0.999805500558022	FALSE
1093	PF3D7_0821300.iso1.exon1.amp1_3317	-0.0241126854300603	-0.0938882378842663	-0.069775552454206	0.67162490377325	0.180473236191659	0.336501588403586	-0.0570630240688378	0.999805500558022	FALSE
1094	PF3D7_0821300.iso1.exon3.amp1_3898	-0.048407402577678	0.102865738222265	0.151273140799943	0.704693364280648	0.18445047595876	0.82841908670001	0.0772584853313759	0.999805500558022	FALSE
1095	PF3D7_0821500.1o1_8442	-0.0959265255870792	-0.0230160503883852	0.072910475198694	0.69614224507046	0.401448670901549	0.364244270092846	0.0305714411244808	0.999805500558022	FALSE
1096	PF3D7_0821600.1o1_4738	-0.0207109413306785	-0.000248996957472158	0.0204619443732064	0.726424960809534	0.299569927084453	0.0567567169648668	0.0120476281429945	0.999805500558022	FALSE
1097	PF3D7_0822600.e2s1_7209	-0.0776710041522757	0.0388227488311561	0.116493752983432	0.614209389882216	0.391328461522883	0.459876417498674	0.0485966369781039	0.999805500558022	FALSE
1098	PF3D7_0823300 (renamed, has duplicates)_6432	0.0295989843885211	0.191597345367361	0.16199836097884	0.830607044202106	0.405639480780496	1.58079902987087	0.0414684529494054	0.999805500558022	FALSE
1099	PF3D7_0823300.e1s1_7488	-0.183625804848367	0.2839608016385	0.467586606486867	0.359437717808358	0.765895632494867	0.987321129106363	0.0982049876125602	0.999805500558022	FALSE
1100	PF3D7_0823300.e1s2_7199	-0.0742168426651822	0.0393077106058485	0.113524553271031	0.427713730849062	0.506857893073462	0.23661862495719	0.039065398756685	0.999805500558022	FALSE
1101	PF3D7_0823500.1o1_5877	0.0177096839726882	0.440065612373236	0.422355928400547	0.572185483668244	0.268131064147589	1.5348279440805	0.123353572522093	0.999805500558022	FALSE
1102	PF3D7_0823800_6524	-0.0692189070567165	-0.0448612497717352	0.0243576572849812	0.875684471600265	0.131257575697398	0.323678484993164	0.0247265513526249	0.999805500558022	FALSE
1103	PF3D7_0823900.1o1_8440	-0.154144450427446	-0.00355025138711937	0.150594199040327	0.722687600504259	0.348775846048552	0.876642093751128	0.0570554055891232	0.999805500558022	FALSE
1104	PF3D7_0824200.iso1.exon2.amp1_seg1_3174	-0.0519584271639575	0.0445328371042532	0.0964912642682106	0.175791236558123	0.217720895231888	0.119489650010374	0.076910804334679	0.999805500558022	FALSE
1105	PF3D7_0824200.iso1.exon2.amp2_seg1_3463	-0.0817612986345577	0.0923438903560708	0.174105188990628	0.0560490125466333	0.313293485720485	0.137556008189125	0.0970766483753427	0.999805500558022	FALSE
1106	PF3D7_0824600.1o5_8431	-0.0422693769270318	0.0464557183647088	0.0887250952917406	0.516733835945164	0.255659228629207	0.267326721879391	0.0575430523747455	0.999805500558022	FALSE
1107	PF3D7_0824700.iso1.exon16.amp1_3245	-0.132320444530029	0.0152605889614762	0.147581033491506	0.814830111493912	0.515375624896734	1.30807983052579	0.0376758449040329	0.999805500558022	FALSE
1108	PF3D7_0825200.iso1.exon1.amp1_2065	-0.0335428913233604	-0.0474158521101796	-0.0138729607868191	0.859257755617939	0.182535626361146	0.151677680243605	-0.0128904999261164	0.999805500558022	FALSE
1109	PF3D7_0825200.iso1.exon4.amp1_4086	-0.0542028747833081	0.0231323482082797	0.0773352229915877	0.0758489309867545	0.178745659798756	0.0598772400613279	0.0759525053130337	0.999805500558022	FALSE
1110	PF3D7_0825600.iso1.exon1.amp1_3549	-0.013001214773408	0.0410105254809761	0.0540117402543841	0.929261091824988	0.148697205755457	1.27712344485705	0.0200847869429757	0.999805500558022	FALSE
1111	PF3D7_0825800.iso1.exon1.amp1_1307	0.000817077000988051	0.121518013248074	0.120700936247086	0.793278204116071	0.389087976338628	0.954660514354784	0.0414245289831693	0.999805500558022	FALSE
1112	PF3D7_0826000.iso1.exon1.amp2_3371	0.013896533618331	0.0446536793696836	0.0307571457513527	0.912002962841844	0.286944578183416	0.576329357104333	0.0154493925621835	0.999805500558022	FALSE
1113	PF3D7_0826100.s1_5414	-0.0850631457914396	0.0255411516330437	0.110604297424483	0.412971597256436	0.607514757375997	0.178603340346712	0.0320115536539604	0.999805500558022	FALSE
1114	PF3D7_0826100.s2_5703	-0.159502880791829	0.0335817420743179	0.193084622866147	0.159342195853582	0.605459849220043	0.179472630766065	0.0560680360486376	0.999805500558022	FALSE
1115	PF3D7_0826100.s3_8299	-0.0934544508602059	-0.0669029931217079	0.0265514577384981	0.858464193051751	0.421441931637945	0.276193468155098	0.0108497573312614	0.999805500558022	FALSE
1116	PF3D7_0826100.s4_8588	-0.0512884654136584	-0.13206375958086	-0.0807752941672015	0.429452735301779	0.289179746470997	0.184495745879514	-0.0481680567724495	0.999805500558022	FALSE
1117	PF3D7_0826100.s8_8594	-0.21761882458355	-0.00604305908841418	0.211575765495136	0.311112755345346	0.458833163146068	0.38758042931876	0.0781059257942498	0.999805500558022	FALSE
1118	PF3D7_0826300.1o1_6730	-0.0618046370011709	0.0752928913168372	0.137097528318008	0.614143485462771	0.386648653999192	0.547349295281945	0.0560526881495095	0.999805500558022	FALSE
1119	PF3D7_0826400.iso1.exon6.amp1_665	-0.0828000696689628	0.0706374725755108	0.153437542244474	0.6647577538566	0.212911022565391	0.731283585432012	0.0809846434146999	0.999805500558022	FALSE
1120	PF3D7_0826500.e1s1_5469	-0.0327837453080497	0.316599664627386	0.349383409935435	0.154729035229055	0.450014755754018	0.438163855733778	0.129772283119591	0.999805500558022	FALSE
1121	PF3D7_0826500.e1s2_5180	-0.0554458803638186	-0.0551752254352213	0.000270654928597361	0.99958079324003	0.852055379137359	1.04286513620287	5.1534888654556e-05	0.999805500558022	FALSE
1122	PF3D7_0826700.e2_6241	-0.0714692930690492	0.040728221760758	0.112197514829807	0.641256362997437	0.299710949822038	0.488870011247518	0.0573270454617068	0.999805500558022	FALSE
1123	PF3D7_0827100.s2_5089	0.00699009982380718	0.128083877917701	0.121093778093894	0.812270110164516	0.286664701382358	1.06317579815913	0.0452832629675951	0.999805500558022	FALSE
1124	PF3D7_0827600.2o2_6223	-0.103426157811461	0.282010951542816	0.385437109354278	0.441173476179505	0.398717418725077	1.00210701684366	0.127742436645133	0.999805500558022	FALSE
1125	PF3D7_0827800.e1s1_6935	0.0150659428434915	-0.0236933964757554	-0.038759339319247	0.914830522911206	0.205499072428281	0.757964778384365	-0.0202892380435797	0.999805500558022	FALSE
1126	PF3D7_0827800.e1s3_6929	-0.101494546473761	0.0368815700238184	0.138376116497579	0.191906326305244	0.457447955285559	0.144017075692544	0.0531460065831576	0.999805500558022	FALSE
1127	PF3D7_0827900.e2_7119	-0.0786949159143959	0.189083698000205	0.267778613914601	0.494199443651173	0.235016389954728	0.793619940260859	0.129333325837388	0.999805500558022	FALSE
1128	PF3D7_0828100.iso1.exon3.amp1_1012	0.0491735236845159	-0.0109154415060139	-0.0600889651905299	0.65570398784562	0.382467093301313	0.247859117495739	-0.027071685601609	0.999805500558022	FALSE
1129	PF3D7_0828200.iso1.exon1.amp2_1624	-0.0188485761899071	0.243558444163728	0.262407020353635	0.549458798799987	0.14179417564111	0.897632759594517	0.133451809760221	0.999805500558022	FALSE
1130	PF3D7_0828400.1o1_8192	-0.0577175671062654	-0.0288544273726508	0.0288631397336146	0.870986043363142	0.3807785280414	0.349347705858879	0.0127459612082618	0.999805500558022	FALSE
1131	PF3D7_0828500.4o4_8157	-0.126379136304336	0.0203074380162601	0.146686574320597	0.669854870237922	0.299472152384982	0.707335985017624	0.0664620415246772	0.999805500558022	FALSE
1132	PF3D7_0829000.e2s1_7406	-0.12098094188102	0.059338152632926	0.180319094513946	0.285143753415683	0.566374616242375	0.280799237991567	0.0554359516006282	0.999805500558022	FALSE
1133	PF3D7_0829600.1o1_8708	-0.0638642738604387	0.0820830044727806	0.145947278333219	0.256471934153271	0.177005216423935	0.242903165843678	0.131138846583723	0.999805500558022	FALSE
1134	PF3D7_0830600.2o2_6153	-0.122956543537329	-0.144836375119115	-0.0218798315817862	0.908839132358984	0.284129477644704	0.38944362342942	-0.0122503322126754	0.999805500558022	FALSE
1135	PF3D7_0830800.iso1.exon1.amp1_1373	-0.0194385436930693	0.289730864152692	0.309169407845761	0.114514615786889	0.226976468642936	0.343464370243918	0.212315525860909	0.999805500558022	FALSE
1136	PF3D7_0830800.iso1.exon1.amp2_4505	-0.0398870100400686	0.214592172374988	0.254479182415056	0.353275115218421	0.259851532514401	0.537565437945835	0.139734394018563	0.999805500558022	FALSE
1137	PF3D7_0830800.iso1.exon2.amp1_1892	-0.0336488139432571	0.249385427503013	0.283034241446271	0.283217746899645	0.134350548555595	0.50990666406478	0.222536129157669	0.999805500558022	FALSE
1138	PF3D7_0831100.iso1.exon1.amp2_3348	-0.0467947270534227	0.0010017689753564	0.0477964960287791	0.909117803924625	0.210402828554913	0.876403225333865	0.0225591998628193	0.999805500558022	FALSE
1139	PF3D7_0831100.iso1.exon2.amp1_4116	0.125026159460092	0.0853067651731298	-0.0397193942869621	0.772431412710434	0.456126345888919	0.239621584591446	-0.0151348346794085	0.999805500558022	FALSE
1140	PF3D7_0831200.iso1.exon1.amp1_2190	-0.0853237753049443	-0.0153144990533377	0.0700092762516066	0.451514016059823	0.401049570665875	0.130695887450604	0.0306562379374479	0.999805500558022	FALSE
1141	PF3D7_0831300.2o2_7356	0.0273895208899251	0.0126435248413795	-0.0147459960485455	0.976052097082921	0.622008179792439	1.01047703861093	-0.0036340840978886	0.999805500558022	FALSE
1142	PF3D7_0831400.2o2_8450	-0.0191779629613965	0.0716853890497195	0.0908633520111159	0.450753132170462	0.534559203908622	0.163012200428551	0.029875031658717	0.999805500558022	FALSE
1143	PF3D7_0831500.iso1.exon2.amp1_2951	-0.00623715228709753	-0.0762690884110917	-0.0700319361239942	0.932567688465904	0.23828079433559	1.7368976714249	-0.018794752670241	0.999805500558022	FALSE
1144	PF3D7_0831500.iso1.exon3.amp1_1846	-0.0256137805779016	-0.0131524663172645	0.0124613142606372	0.861231375704042	0.303871785847132	0.103360970209736	0.00719748037157187	0.999805500558022	FALSE
1145	PF3D7_0831700.2o2_5026	-0.00563008430083435	0.244301884945387	0.249931969246222	0.802310080329269	0.245990155190485	2.08758698118227	0.0567903506292015	0.999805500558022	FALSE
1146	PF3D7_0831800.2o2_5849	0.0207870814576324	0.0938207530020417	0.0730336715444093	0.482314945489565	0.363639199365091	0.173865421076111	0.0350073589165585	0.999805500558022	FALSE
1147	PF3D7_0832000.iso1.exon3.amp1_1848	-0.0814594581034815	0.0284393267187905	0.109898784822272	0.670111606977653	0.326401167945354	0.524600969845448	0.0517491340594872	0.999805500558022	FALSE
1148	PF3D7_0832300.2o2_7858	-0.0521885709322328	0.0631399859887068	0.11532855692094	0.0901929660919991	0.253259064508314	0.101366587779801	0.0797060872575886	0.999805500558022	FALSE
1149	PF3D7_0832400.iso1.exon3.amp1_1853	-0.121557311065205	0.176933268564807	0.298490579630012	0.727003719077658	0.587050516309872	1.77135044491113	0.0614708832409982	0.999805500558022	FALSE
1150	PF3D7_0832800.iso1.exon3.amp1_1854	-0.155679938687072	0.160995112518414	0.316675051205486	0.321239642489166	0.427009883472623	0.615340446277985	0.116812330406966	0.999805500558022	FALSE
1151	PF3D7_0832900.iso1.exon3.amp1_986	-0.142057201250445	0.0574018564817393	0.199459057732185	0.473672100330767	0.727000554740904	0.514968948632625	0.0470473001436372	0.999805500558022	FALSE
1152	PF3D7_0833000.iso1.exon3.amp1_3881	-0.156824813756713	0.0429739867909429	0.199798800547656	0.235621196778214	0.761826523752251	0.215991938087396	0.0461307829198724	0.999805500558022	FALSE
1153	PF3D7_0833100.iso1.exon3.amp1_4170	-0.172086435637837	-0.0210155483565458	0.151070887281291	0.575223032174504	0.641075950845832	0.513176994096434	0.0400834031191338	0.999805500558022	FALSE
1154	PF3D7_0833200.iso1.exon3.amp1_3030	-0.0949388354951298	0.0829408721999037	0.177879707695034	0.484144460207947	0.385264993417987	0.502499970158002	0.0741181111174849	0.999805500558022	FALSE
1155	PF3D7_0833300.iso1.exon1.amp1_1870	0.00377683003138435	0.0553172711719924	0.051540441140608	0.906108903918054	0.357486418000414	0.909568991804279	0.0189482405186767	0.999805500558022	FALSE
1156	PF3D7_0833400.iso1.exon3.amp1_4185	-0.0491981276222751	0.0286574773307187	0.0778556049529938	0.0642373262596515	0.21739681906727	0.0339156844646836	0.0632123710677016	0.999805500558022	FALSE
1157	PF3D7_0833500.iso1.exon3.amp1_3614	-0.122138562657965	0.247694979682962	0.369833542340927	0.274762524862624	0.346765735477418	0.648438374476126	0.157272397582074	0.999805500558022	FALSE
1158	PF3D7_0900100.iso1.exon2.amp1_151	-0.17477356431103	0.16290532818488	0.33767889249591	0.0272152383894062	0.410262111664085	0.233427656692944	0.142644009668684	0.999805500558022	FALSE
1159	PF3D7_0900200.e2s1_8924	-0.160175002036407	0.0775972043375678	0.237772206373974	0.350733136376373	0.493663376763028	0.483391953350087	0.0804590278471307	0.999805500558022	FALSE
1160	PF3D7_0900300.iso1.exon1.amp1_1001	-0.101307558424048	0.0442224895372163	0.145530047961265	0.227655459778638	0.366209472156513	0.205748908633938	0.0689040596373824	0.999805500558022	FALSE
1161	PF3D7_0900400.iso1.exon2.amp1_1867	-0.0464382525871902	0.0701369266482128	0.116575179235403	0.00271127169164737	0.1754450055763	0.0407944248308137	0.117065118765451	0.999805500558022	FALSE
1162	PF3D7_0900500.iso1.exon1.amp1_4464	-0.128881789905179	0.291436039871087	0.420317829776266	0.496896027060284	0.425671287648779	1.25238612483941	0.120972141068015	0.999805500558022	FALSE
1163	PF3D7_0900600.iso1.exon1.amp1_424	-0.139330488522107	0.171988950407821	0.311319438929928	0.513831592699119	0.462567636212688	0.962253402678393	0.0958440181636673	0.999805500558022	FALSE
1164	PF3D7_0900700.iso1.exon1.amp1_2726	-0.119965223725419	0.0929982220655681	0.212963445790987	0.456970756220791	0.499558694096548	0.558289855966488	0.0700877694891047	0.999805500558022	FALSE
1165	PF3D7_0900900.iso1.exon1.amp1_4454	-0.159106265068231	0.159691241950883	0.318797507019114	0.317592565695968	0.590409144337713	0.603150089541558	0.0897760644286	0.999805500558022	FALSE
1166	PF3D7_0901000.iso1.exon1.amp1_3010	-0.0727701046339016	0.0745968827538658	0.147366987387767	0.238740567411972	0.428137616723939	0.204488447411465	0.0599979499323194	0.999805500558022	FALSE
1167	PF3D7_0901100.iso1.exon1.amp1_3608	-0.108465741232964	0.154914071393216	0.263379812626181	0.158618768246008	0.30734761173117	0.335800884012969	0.141311306326183	0.999805500558022	FALSE
1168	PF3D7_0901300.iso1.exon2.amp1_1859	-0.100912942689475	0.0309988689361337	0.131911811625608	0.668987159318926	0.384808996628072	0.627729781892021	0.0524938266298165	0.999805500558022	FALSE
1169	PF3D7_0901400.iso1.exon2.amp1_711	-0.0596831776370022	-0.013361254754826	0.0463219228821762	0.577716614574833	0.170791080811488	0.161907545879539	0.0454599198824508	0.999805500558022	FALSE
1170	PF3D7_0901500.iso1.exon2.amp1_4476	-0.14434208143093	0.212492805095181	0.356834886526111	0.0779549281589737	0.615823962761003	0.32346051927127	0.100710205528531	0.999805500558022	FALSE
1171	PF3D7_0901600.iso1.exon2.amp1_1269	-0.21339486516812	0.0249997266570684	0.238394591825189	0.630559834241039	0.700470971140855	0.999502165848129	0.053714925683295	0.999805500558022	FALSE
1172	PF3D7_0901800.2o2_8725	0.0339547174373557	0.0127107595612284	-0.0212439578761274	0.952979234858345	0.307885134200345	0.749828047925139	-0.009243186975852	0.999805500558022	FALSE
1173	PF3D7_0902200.2o3_7910	-0.106180522259632	0.129242240689254	0.235422762948885	0.512156110179048	0.526335250824425	0.713864341282721	0.0712966067269317	0.999805500558022	FALSE
1174	PF3D7_0902300.2o3_7037	0.0176047523391104	0.0147188344059447	-0.00288591793316561	0.991896476909233	0.14474931100205	0.595216843202015	-0.00199737450840605	0.999805500558022	FALSE
1175	PF3D7_0902400.iso1.exon2.amp1_1014	-0.0137622229894238	0.0622325023063333	0.075994725295757	0.748294025901441	0.165209006502806	0.491179803193673	0.0560478359398345	0.999805500558022	FALSE
1176	PF3D7_0902600.2o3_8194	-0.0309014038124762	0.237030784272589	0.267932188085065	0.777357814818256	0.177347031636774	1.97974642732008	0.0655955220001042	0.999805500558022	FALSE
1177	PF3D7_0902800.2o4_7652	0.10580375272797	0.101149392082203	-0.00465436064576763	0.995784714233655	0.77714139029938	1.83282308276734	-0.000813141394133662	0.999805500558022	FALSE
1178	PF3D7_0902800.4o4_7941	0.0589277987681363	0.0812569515741366	0.0223291528060003	0.91782745904924	0.450612773742327	0.42750396179028	0.00830504885689688	0.999805500558022	FALSE
1179	PF3D7_0902900.1o1_8123	-0.0508620561087608	0.280673830294299	0.33153588640306	0.609743439382663	0.359841736201554	1.33570725876266	0.0987133302195326	0.999805500558022	FALSE
1180	PF3D7_0903000.1o1_9002	-0.00669881321536342	-0.00422196651097799	0.00247684670438543	0.990530459469896	0.195827123633591	0.433560376688484	0.00176064393662259	0.999805500558022	FALSE
1181	PF3D7_0903000_5973	0.0289250613650997	0.0445708224912213	0.0156457611261216	0.953183210732669	0.192308467073969	0.556191648704161	0.0100557350835653	0.999805500558022	FALSE
1182	PF3D7_0903300.iso1.exon1.amp3_3123	0.0141409673003438	0.0269183942361593	0.0127774269358156	0.881071588501315	0.260179215877677	0.154764334907493	0.00849567622599524	0.999805500558022	FALSE
1183	PF3D7_0903300.iso1.exon1.amp4_1038	0.02078247095476	-0.114378961106491	-0.135161432061251	0.854876698708779	0.519627993572744	1.53974970440198	-0.031748913308569	0.999805500558022	FALSE
1184	PF3D7_0903400.e1s3_8886	-0.0054906025338473	0.126085250434754	0.131575852968601	0.726078999251585	0.336690560490708	0.774697789440521	0.0535899897784657	0.999805500558022	FALSE
1185	PF3D7_0903500.e1s1_7220	-0.14912859262542	0.425332974594583	0.574461567220003	0.116282344917362	0.74733004130722	0.633325746496217	0.13016846620338	0.999805500558022	FALSE
1186	PF3D7_0903500.e1s2_7214	0.0834977441023344	0.147605490400472	0.0641077462981375	0.933742224181061	0.373790276530077	1.61504174893813	0.0166055204017017	0.999805500558022	FALSE
1187	PF3D7_0903700.e3s1_4884	-0.0442271935267985	0.0737000381453168	0.117927231672115	0.737994648534882	0.356571289663186	0.725645804551084	0.0474571594653173	0.999805500558022	FALSE
1188	PF3D7_0903800.iso1.exon2.amp1_1662	-0.0886369746596259	0.0500320380871219	0.138669012746748	0.329589634758911	0.284281294615503	0.267818526995478	0.0818107779579505	0.999805500558022	FALSE
1189	PF3D7_0903800.iso1.exon2.amp2_3644	-0.160315001455102	0.0123825618672182	0.17269756332232	0.744738021502296	0.519790416207806	1.09312072321432	0.047132592592951	0.999805500558022	FALSE
1190	PF3D7_0904900.e1s1_8018	0.000280997038329612	0.132996761265576	0.132715764227246	0.0876072392758957	0.178843835836879	0.130436948369889	0.127026676493653	0.999805500558022	FALSE
1191	PF3D7_0904900.e1s3_6567	-0.0594810999061705	0.154852982971957	0.214334082878127	0.694771952353432	0.165923309976745	1.13460873423247	0.0872812314133407	0.999805500558022	FALSE
1192	PF3D7_0905100.iso1.exon2.amp1_4406	0.00208664425933236	0.0539710758640307	0.0518844316046984	0.61093779467354	0.467152060354193	0.132423764178056	0.0195359064264623	0.999805500558022	FALSE
1193	PF3D7_0905100.iso1.exon3.amp1_1647	-0.0656655782220723	-0.0151725810506289	0.0504929971714434	0.771900450267563	0.468778377161362	0.326740369579628	0.0184878673840945	0.999805500558022	FALSE
1194	PF3D7_0905300.s5_9157	0.00122961545199212	0.0610134933987009	0.0597838779467088	0.889794770138542	0.292748809990423	0.900237278496825	0.0244389296794573	0.999805500558022	FALSE
1195	PF3D7_0905300.s6_8296	-0.0227073754198874	-0.312093976368179	-0.289386600948292	0.409659320631049	0.266914432088979	0.699137028641446	-0.140622219250902	0.999805500558022	FALSE
1196	PF3D7_0905300.s7_8001	-0.0644171098685189	0.130878916535388	0.195296026403907	0.0467743676887531	0.294728800851049	0.15264167218832	0.115221801579332	0.999805500558022	FALSE
1197	PF3D7_0905400.e7s1_7466	-0.00167298580173243	-0.0283786022952182	-0.0267056164934857	0.958745532257346	0.238101856171824	1.08193331485348	-0.0104776431255358	0.999805500558022	FALSE
1198	PF3D7_0905600.2o2_5648	-0.0415688493692432	-0.0128231820647532	0.02874566730449	0.675318892167751	0.221428870780185	0.120808174790975	0.0225335838860326	0.999805500558022	FALSE
1199	PF3D7_0905900.iso1.exon1.amp1_3487	-0.061517082038587	0.000816766744371478	0.0623338487829585	0.605293459578036	0.178024249242661	0.242075886106612	0.0557850698718929	0.999805500558022	FALSE
1200	PF3D7_0905900.iso1.exon1.amp2_seg1_1439	-0.0612975822451757	0.145170518481499	0.206468100726675	0.0906631157114515	0.210703856667705	0.20820575380711	0.163530472736744	0.999805500558022	FALSE
1201	PF3D7_0906200.1o1_7631	-0.152834710166289	0.0586721640217075	0.211506874187997	0.430716140448543	0.566185066962423	0.511655451323349	0.0629048553438076	0.999805500558022	FALSE
1202	PF3D7_0906300.1o1_4700	0.0335503774369368	-0.0997401032794056	-0.133290480716342	0.597538387390868	0.373165532309297	0.506307462032139	-0.0569312389759719	0.999805500558022	FALSE
1203	PF3D7_0906400.e1s1_9120	-0.0816270742332501	-0.0624821294124917	0.0191449448207584	0.897748197692251	0.4045958853295	0.279744236759081	0.00812558250194594	0.999805500558022	FALSE
1204	PF3D7_0906500.1o1_4999	-0.117215477099745	-0.0143059362101233	0.102909540889622	0.888606430970826	0.643659874103017	1.5267298454542	0.0216562164011973	0.999805500558022	FALSE
1205	PF3D7_0906900.1o2_5563	-0.0219986583176052	-0.0174684840083231	0.0045301743092821	0.9530874926368	0.221354283438698	0.142378882058056	0.00352779015036993	0.999805500558022	FALSE
1206	PF3D7_0907200.e1s2_8934	-0.0522340545701122	0.0251249653473394	0.0773590199174516	0.841066399623352	0.34841895122585	0.800025043645288	0.0304723116763435	0.999805500558022	FALSE
1207	PF3D7_0907600.iso1.exon2.amp1_4206	-0.0294460675310737	0.1641266000422	0.193572667573274	0.424901772506657	0.374816138999481	0.474598339631719	0.083326937236326	0.999805500558022	FALSE
1208	PF3D7_0907700.e1s1_8630	-0.0408020429712521	0.368288049675495	0.409090092646747	0.185606531303788	0.274226617494672	0.570782057812661	0.212401124362037	0.999805500558022	FALSE
1209	PF3D7_0908200.iso1.exon2.amp1_4259	-0.0145596881593159	0.0524167082409427	0.0669763964002586	0.339580985744816	0.180993494739913	0.127564705429349	0.0634749658371077	0.999805500558022	FALSE
1210	PF3D7_0908300.iso2.exon2.amp1_3507	-0.0408693944743553	0.238247955476918	0.279117349951273	0.00952535893326214	0.271144095551622	0.154122440048325	0.17840796373296	0.999805500558022	FALSE
1211	PF3D7_0908400.2o2_5815	-0.037591405476582	-0.0199513839097904	0.0176400215667916	0.82121849747624	0.365048043685962	0.0981626034997881	0.00850394030631692	0.999805500558022	FALSE
1212	PF3D7_0908500.e15s1_7738	0.0380640577159897	0.0696811614395223	0.0316171037235326	0.926509747990902	0.44127927334266	0.704249862255117	0.0110309872667822	0.999805500558022	FALSE
1213	PF3D7_0908500.e17s1_8622	-0.0607683684816264	0.0473149046730207	0.108083273154647	0.203020243084159	0.209848689238058	0.150384688483956	0.08826052871555	0.999805500558022	FALSE
1214	PF3D7_0908500.e4s1_8616	-0.0889498580467213	-0.130554917706665	-0.0416050596599439	0.896633887753806	0.248026994188467	0.66708224105729	-0.0214889115074178	0.999805500558022	FALSE
1215	PF3D7_0908700.iso1.exon6.amp1_4386	-0.0250985547941857	0.0335764756581096	0.0586750304522953	0.32728257939565	0.118844691724836	0.11280680647531	0.0827417754017736	0.999805500558022	FALSE
1216	PF3D7_0909100.1o1_4745	0.0181948226328126	-0.0197112950946803	-0.0379061177274929	0.5843354983488	0.220832515651287	0.121948480893959	-0.0297815855260794	0.999805500558022	FALSE
1217	PF3D7_0909500_5686	0.0657109472282021	0.0698173595772754	0.00410641234907334	0.993891744764276	0.58630069655568	1.10965081332584	0.00102900954115615	0.999805500558022	FALSE
1218	PF3D7_0909600.3o3_8193	-0.104821199225747	0.0855040531315858	0.190325252357333	0.371985153415569	0.249093581079881	0.417769888281047	0.116180556425848	0.999805500558022	FALSE
1219	PF3D7_0909700.iso1.exon1.amp1_1703	-0.180474985012768	-0.0558229612424114	0.124652023770356	0.600878072585236	0.41285446725126	0.472710460871009	0.0494737267487945	0.999805500558022	FALSE
1220	PF3D7_0909900.iso1.exon1.amp1_1689	-0.0138466995185363	0.0302088025741448	0.0440555020926811	0.842357409965921	0.287470606188213	0.454046992165298	0.0236533212185203	0.999805500558022	FALSE
1221	PF3D7_0909900.iso1.exon1.amp2_2197	-0.0296528368157258	0.118485865409242	0.148138702224968	0.834223895355364	0.213667131043413	1.48151801354199	0.0462922163796137	0.999805500558022	FALSE
1222	PF3D7_0910000.iso1.exon1.amp2_1355	-0.0627906721986345	0.0428596531829257	0.10565032538156	0.240253638142308	0.158555749269543	0.166990755521681	0.110387032865848	0.999805500558022	FALSE
1223	PF3D7_0910200.iso1.exon1.amp1_1395	-0.0848159682145345	0.171630149318199	0.256446117532734	0.195915695218237	0.359700943758981	0.361236384011749	0.118767325107897	0.999805500558022	FALSE
1224	PF3D7_0910400.iso1.exon1.amp2_seg1_2878	0.00451182846149174	0.0935723170924199	0.0890604886309281	0.820580730986766	0.156115791367399	0.82077544523677	0.0477785320560624	0.999805500558022	FALSE
1225	PF3D7_0910400.iso1.exon1.amp2_seg2_864	-0.0434353812890797	0.09369256315826	0.13712794444734	0.706518788814836	0.192723503043585	0.755318196756899	0.0736080130067214	0.999805500558022	FALSE
1226	PF3D7_0910900.iso1.exon2.amp1_3342	0.0560261133814708	0.0385586988086036	-0.0174674145728672	0.881631900371925	0.460211773498865	0.184851343473148	-0.00664293944080616	0.999805500558022	FALSE
1227	PF3D7_0911100.e1s1_9127	-0.0625271190696557	-0.107400633754847	-0.0448735146851911	0.855156673663335	0.434614431874715	0.493842648077961	-0.0169364254100958	0.999805500558022	FALSE
1228	PF3D7_0911300.e1s2_8013	-0.147704656465531	-0.0539250446466877	0.0937796118188435	0.597453963479508	0.591629753343631	0.306918416981226	0.0275612418832035	0.999805500558022	FALSE
1229	PF3D7_0911900.2o2_4716	-0.0996742100096439	-0.16352636426408	-0.0638521542544366	0.637476282333129	0.383929312914113	0.24903735816841	-0.0286562159650917	0.999805500558022	FALSE
1230	PF3D7_0911900.e2_7125	-0.101762172696165	-0.0911938616374403	0.0105683110587249	0.977162308908509	0.405784909208668	0.763551697808201	0.00383322437161659	0.999805500558022	FALSE
1231	PF3D7_0912500.2o7_6421	0.025229818966936	0.0249591724774429	-0.000270646489493057	0.997372567118961	0.233161306953413	0.152590697870673	-0.000199915309551872	0.999805500558022	FALSE
1232	PF3D7_0912600.iso1.exon1.amp1_741	-0.0520563952639303	0.0440067492140393	0.0960631444779696	0.718619674910375	0.37802438430928	0.540945637413176	0.0400842283277924	0.999805500558022	FALSE
1233	PF3D7_0912600.iso1.exon2.amp1_4466	-0.0329729828374719	0.0324575312357179	0.0654305140731898	0.408425797314422	0.241954951293465	0.139156048260046	0.0468460601228619	0.999805500558022	FALSE
1234	PF3D7_0912800.1o1_8778	-0.0788986015846824	0.429260727705127	0.508159329289809	0.497770477958311	0.490666815682884	1.51818146506117	0.123524527452822	0.999805500558022	FALSE
1235	PF3D7_0912900.e2s1_6018	-0.0664608040878124	0.198734780754675	0.265195584842487	0.445453673220619	0.210187070320754	0.698594851426889	0.14455017640023	0.999805500558022	FALSE
1236	PF3D7_0913500.3o3_7012	-0.0614604661742784	0.0385407384205827	0.100001204594861	0.217878972997948	0.224624879678023	0.141418304264059	0.0768195427661885	0.999805500558022	FALSE
1237	PF3D7_0914000.1o1_7665	-0.0459745779467285	0.114848816458165	0.160823394404894	0.466507125289907	0.298793840005995	0.437944802694943	0.0844794120301243	0.999805500558022	FALSE
1238	PF3D7_0914100.iso1.exon1.amp1_2279	-0.0385724767824863	0.0516414206517059	0.0902138974341921	0.405312376584219	0.252611859775048	0.203012338413634	0.0607275347908353	0.999805500558022	FALSE
1239	PF3D7_0914200.3o4_7023	-0.0319764385937044	0.134831286625374	0.166807725219079	0.218003088056408	0.287104378935821	0.245756103671571	0.0983041743265658	0.999805500558022	FALSE
1240	PF3D7_0914800.1o1_6098	-0.106101360008009	0.00748255091878711	0.113583910926796	0.408418065245407	0.309816360362991	0.258701768218991	0.062157198891223	0.999805500558022	FALSE
1241	PF3D7_0915300.iso1.exon1.amp1_149	-0.0377061434617727	0.0761318295808643	0.113837973042637	0.55225836834024	0.317184170991701	0.379487922925191	0.0584327960417678	0.999805500558022	FALSE
1242	PF3D7_0915400.e1s1_6348	-0.0883698441344086	0.046947766772346	0.135317610906755	0.834799036929375	0.439215423220047	1.35165057188924	0.03685478327839	0.999805500558022	FALSE
1243	PF3D7_0916200.iso1.exon1.amp1_2352	-0.0399242135379908	0.16394374490838	0.20386795844637	0.00964118549302446	0.185828074369451	0.112687849511689	0.189628569205027	0.999805500558022	FALSE
1244	PF3D7_0916200.iso1.exon2.amp1_2241	-0.0521087346738376	-0.251064865644835	-0.198956130970998	0.24695457113846	0.242325209476727	0.323187482467385	-0.131276605831752	0.999805500558022	FALSE
1245	PF3D7_0916200.iso1.exon2.amp2_1904	-0.0135902792420262	-0.0848016011951827	-0.0712113219531565	0.32220238469948	0.16209567866962	0.133353497091189	-0.0745705941722826	0.999805500558022	FALSE
1246	PF3D7_0916700.e1s1_6618	-0.109777356884334	-0.0352175944774846	0.074559762406849	0.389377447116862	0.364763254514722	0.124551868636937	0.0358737280206182	0.999805500558022	FALSE
1247	PF3D7_0916800.iso1.exon1.amp1_3204	-0.0584770008566838	-0.0392908584550312	0.0191861424016525	0.831733279838426	0.341626414895574	0.146244651191656	0.00981619479542784	0.999805500558022	FALSE
1248	PF3D7_0917000.iso1.exon1.amp2_1923	-0.101965266688073	-0.0299190160626257	0.0720462506254471	0.605072936215926	0.496794606769082	0.232564898912283	0.0252924648423797	0.999805500558022	FALSE
1249	PF3D7_0917200.2o2_4677	-0.0202209411322017	0.000213371655323158	0.0204343127875248	0.968135548760208	0.315015180464301	1.06975188225723	0.00733880989208455	0.999805500558022	FALSE
1250	PF3D7_0917300.1o1_6428	-0.0372831856656016	-0.0771861439901645	-0.0399029583245629	0.585179697311388	0.334306997254287	0.0950780432147898	-0.0209942401772692	0.999805500558022	FALSE
1251	PF3D7_0917500.e1s1_7508	-0.0340576253784581	0.110319034356467	0.144376659734925	0.380788782594123	0.225475579345921	0.32158967143115	0.101070622223312	0.999805500558022	FALSE
1252	PF3D7_0917900.e2_8279	-0.0355759852357129	0.0318920645256203	0.0674680497613332	0.892653014306604	0.306787409971198	1.04438910894654	0.024844108553377	0.999805500558022	FALSE
1253	PF3D7_0918000.e1s1_8347	-0.066995125358244	-0.0167080982164272	0.0502870271418168	0.839604389278779	0.339699536577018	0.507907802853058	0.0231353414775796	0.999805500558022	FALSE
1254	PF3D7_0918300.e2s1_6599	-0.19420458798358	0.327268283831442	0.521472871815022	0.636162605300552	0.553684150888957	2.27415302022018	0.0944281988584378	0.999805500558022	FALSE
1255	PF3D7_0918900.e1s1_7198	0.0292687044328695	0.0901085032886115	0.060839798855742	0.920947203258157	0.333980127060832	1.28271396649774	0.0190958017582625	0.999805500558022	FALSE
1256	PF3D7_0918900.e1s2_7481	-0.041960287131743	-0.0807611675476885	-0.0388008804159455	0.845722388752066	0.24807760447903	0.409538921433255	-0.023879167531124	0.999805500558022	FALSE
1257	PF3D7_0919200.iso1.exon1.amp1_389	-0.062108783798033	0.0520435752214869	0.11415235901952	0.127317277893913	0.221768503890557	0.124095001088006	0.089263321058664	0.999805500558022	FALSE
1258	PF3D7_0919400.e1s1_4873	-0.0351759198886532	0.155084264591737	0.190260184480391	0.495964325839587	0.20360958334134	0.56522363056494	0.117891686553894	0.999805500558022	FALSE
1259	PF3D7_0919800.iso1.exon1.amp1_3111	-0.0619566084631944	0.01525843168451	0.0772150401477044	0.449685942942093	0.4063489194282	0.156111220386433	0.0332857306831781	0.999805500558022	FALSE
1260	PF3D7_0919800.iso1.exon1.amp2_seg1_1133	-0.0823373478016728	0.00826700231454076	0.0906043501162136	0.822908017280895	0.469466343867111	0.833075988732798	0.0289000355897073	0.999805500558022	FALSE
1261	PF3D7_0919900.iso1.exon1.amp1_1105	-0.189923779471707	-0.062376477862405	0.127547301609302	0.350961689648256	0.616709058198024	0.17888643128218	0.036370065451306	0.999805500558022	FALSE
1262	PF3D7_0919900.iso1.exon1.amp4_1035	0.00426326535959263	0.0922282437873111	0.0879649784277185	0.418181804462391	0.212198627895884	0.208506245377343	0.06922292359481	0.999805500558022	FALSE
1263	PF3D7_0920300.1o4_5819	-0.0877394209402188	0.270991367521764	0.358730788461983	0.25249691219122	0.441917557142797	0.590746819866602	0.129739732097407	0.999805500558022	FALSE
1264	PF3D7_0920400.s1_5698	-0.0183564126946021	0.014264137051731	0.0326205497463331	0.560969255694084	0.288317582868754	0.05327860798745	0.019958148132764	0.999805500558022	FALSE
1265	PF3D7_0920800.e1s1_4875	-0.0344046388524857	-0.0274097421907481	0.00699489666173767	0.971033152085289	0.238000348268668	0.396660706473696	0.00447621509923044	0.999805500558022	FALSE
1266	PF3D7_0920900.iso1.exon2.amp1_3864	-0.143037869293878	0.039767560442996	0.182805429736874	0.0974141286318296	0.325668459533252	0.17991992376	0.0973885574326201	0.999805500558022	FALSE
1267	PF3D7_0921200.2o6_8242	-0.0460024298067601	-0.0376975561890195	0.00830487361774061	0.941198295783762	0.200660842729262	0.226385334245658	0.00679569984947373	0.999805500558022	FALSE
1268	PF3D7_0921400.e1_5664	-0.0341244005106017	0.0531771326677767	0.0873015331783783	0.50325661840842	0.357559658944828	0.23927431745141	0.0420021243211739	0.999805500558022	FALSE
1269	PF3D7_0921800.1o3_8466	-0.043824236843235	-0.0393631936516869	0.00446104319154816	0.992509142875916	0.18766609508355	0.996689777259369	0.00197527544481651	0.999805500558022	FALSE
1270	PF3D7_0922100.e1s2_8955	-0.0831029785598281	0.0604229645358888	0.143525943095717	0.75885108074005	0.575039149089103	0.957172026008996	0.0380260831612858	0.999805500558022	FALSE
1271	PF3D7_0922200.e1s1_7191	-0.0781831939627488	0.188807038985824	0.266990232948573	0.372445581351409	0.316540865528395	0.588237190105874	0.124614507346625	0.999805500558022	FALSE
1272	PF3D7_0922500_7709	-0.0137478051773301	0.197965586120513	0.211713391297843	0.313821424798796	0.270248117758119	0.404902435345696	0.122378227205614	0.999805500558022	FALSE
1273	PF3D7_0922800.iso1.exon4.amp3_229	-0.0955116273222891	0.151896187137927	0.247407814460216	0.282600902017976	0.522730667164019	0.422554572820266	0.08044719306906	0.999805500558022	FALSE
1274	PF3D7_0923800.1.e1s1_7487	0.00334507789441735	0.0912996004757865	0.0879545225813691	0.298983032267202	0.367106044959262	0.116444174612378	0.0420898823594764	0.999805500558022	FALSE
1275	PF3D7_0923800.iso2.exon1.amp1_446	-0.0989246537582837	0.212871992666341	0.311796646424625	0.00251210012510998	0.297113477467942	0.13700330711933	0.183095662270516	0.999805500558022	FALSE
1276	PF3D7_0924000.iso1.exon1.amp1_3692	0.0574259889235272	0.00626231826081209	-0.0511636706627151	0.882647789368317	0.447595170067722	0.711402443119056	-0.0176161676981608	0.999805500558022	FALSE
1277	PF3D7_0924000.iso1.exon1.amp2_3981	-0.0340405902048266	0.21663720832695	0.250677798531776	0.657065628530437	0.27279328573205	1.1672864878228	0.089576078833282	0.999805500558022	FALSE
1278	PF3D7_0924000.iso1.exon2.amp1_2373	-0.0892513579111731	0.0527094549497704	0.141960812860944	0.170687182294422	0.313367154892201	0.173920110307057	0.0785843356159994	0.999805500558022	FALSE
1279	PF3D7_0924200.iso1.exon1.amp1_2570	-0.0688476242184335	0.14399226149054	0.212839885708973	0.167983855279103	0.36392815244835	0.271510998470898	0.0999670191376872	0.999805500558022	FALSE
1280	PF3D7_0924600.iso1.exon1.amp1_2177	-0.0652327076767056	-0.095818898393091	-0.0305861907163854	0.935848326671926	0.527114185364396	0.77792926337633	-0.00909406565954715	0.999805500558022	FALSE
1281	PF3D7_0924600.iso1.exon2.amp2_seg1_2289	-0.0169204396524321	0.0628199369413597	0.0797403765937918	0.439494092464104	0.256278331137122	0.191969950517437	0.0531705966574314	0.999805500558022	FALSE
1282	PF3D7_0925300.1o1_6180	-0.0443333246343619	0.000717288854743359	0.0450506134891053	0.506066423498486	0.313804829109358	0.0857444228712478	0.0252609074662335	0.999805500558022	FALSE
1283	PF3D7_0925800.e1s1_9121	-0.0160222401680353	-0.0366838327610541	-0.0206615925930188	0.936257653331998	0.422913621578651	0.523236408803824	-0.0079126057181847	0.999805500558022	FALSE
1284	PF3D7_0925900.e2s1_8042	-0.0980116981964626	0.0288374040512107	0.126849102247673	0.165616042927694	0.30357002965727	0.148611236814202	0.0727853558403039	0.999805500558022	FALSE
1285	PF3D7_0926200.iso1.exon1.amp1_3505	-0.0536493070304698	0.0892115016586086	0.142860808689078	0.380515743206488	0.25614979066908	0.315809823876648	0.0903793177288341	0.999805500558022	FALSE
1286	PF3D7_0926500.iso1.exon1.amp2_2495	-0.0170469973892685	0.0899203594018829	0.106967356791151	0.487308620447049	0.213536989165177	0.30594453226362	0.0789960536193244	0.999805500558022	FALSE
1287	PF3D7_0927300.e1s1_7797	-0.0125005391799533	0.0862627254679111	0.0987632646478644	0.798466543597561	0.223011579228119	0.805901611570703	0.048252450411116	0.999805500558022	FALSE
1288	PF3D7_0927700.1o1_7283	-0.0502223275175947	-0.068284878295254	-0.0180625507776593	0.875114874031835	0.344038150717775	0.209525044478283	-0.00907311390458696	0.999805500558022	FALSE
1289	PF3D7_0927800.2o2_4680	-0.0134082106709627	-0.157186612173925	-0.143778401502962	0.131902824986444	0.265377545237575	0.160786990190061	-0.0936509619132744	0.999805500558022	FALSE
1290	PF3D7_0927900.1o1_4984	-0.0267556806099476	0.0209620165092105	0.047717697119158	0.538991967421987	0.271240237845951	0.130620856547653	0.0306580899869072	0.999805500558022	FALSE
1291	PF3D7_0928600.1o1_6100	-0.077525518588222	-0.0663654671469942	0.0111600514412278	0.933615784895814	0.31175687722674	0.260207254887217	0.00606938210033226	0.999805500558022	FALSE
1292	PF3D7_0928700.iso1.exon1.amp1_3151	0.0223702564827792	0.171786351512635	0.149416095029856	0.771171057183872	0.154827518622564	1.07225762183401	0.0645016179456948	0.999805500558022	FALSE
1293	PF3D7_0929000.2o2_8472	-0.0598346066330771	-0.0629068673294423	-0.00307226069636522	0.994890448155833	0.369505233579466	1.00053660262867	-0.00106171393072914	0.999805500558022	FALSE
1294	PF3D7_0929000.e2_5102	-0.0868368324413058	-0.149519906401534	-0.0626830739602284	0.908145249371563	0.40621598535725	1.13254644203905	-0.0194269143013844	0.999805500558022	FALSE
1295	PF3D7_0929600.2o2_4963	-0.00380435066174669	-0.155377166673092	-0.151572816011345	0.000269223534516101	0.185159752922927	0.0401267015285953	-0.144287489328316	0.377451395391574	FALSE
1296	PF3D7_0929800.iso1.exon1.amp1_4123	-0.0730300991911753	-0.049361395017225	0.0236687041739502	0.958291431554546	0.313716576793137	0.945109763993184	0.00912883281585052	0.999805500558022	FALSE
1297	PF3D7_0929900.iso1.exon1.amp1_1496	-0.0519430427653114	0.115955382468715	0.167898425234026	0.380186483261828	0.219471776112997	0.375792783625645	0.115688826588405	0.999805500558022	FALSE
1298	PF3D7_0930100.iso1.exon1.amp2_192	-0.0458707587044215	0.00897338150277065	0.0548441402071921	0.3181329935254	0.166098355258145	0.0956449680809827	0.0571967188400734	0.999805500558022	FALSE
1299	PF3D7_0930200.iso1.exon4.amp1_2997	-0.0279957105919201	-0.0150737185106809	0.0129219920812391	0.876087034991531	0.19482862007738	0.160500636849692	0.011256945123357	0.999805500558022	FALSE
1300	PF3D7_0930300.s1_9167	-0.0146762764855898	0.23613364439237	0.25080992087796	0.73817165035608	0.412900050267101	1.55889675830479	0.06438180518683	0.999805500558022	FALSE
1301	PF3D7_0930300.s2_8884	0.0142517378974082	0.177678665610948	0.163426927713539	0.233546690710184	0.427551919680684	0.232393097657086	0.0663567423211123	0.999805500558022	FALSE
1302	PF3D7_0930600.iso1.exon5.amp1_2100	-0.0620719158985544	0.0383850007225146	0.100456916621069	0.319134556311038	0.221820227304617	0.187398883604785	0.0767090748222661	0.999805500558022	FALSE
1303	PF3D7_0930700.iso1.exon1.amp1_702	-0.0694609063381825	0.0291305639852059	0.0985914703233884	0.5543686788215	0.185838034768695	0.336981038994019	0.0789523024201393	0.999805500558022	FALSE
1304	PF3D7_0930700.iso1.exon2.amp1_2944	-0.0492722281675246	-0.027645251894959	0.0216269762725656	0.787305399005489	0.27558128733034	0.137548266019378	0.0136619357866776	0.999805500558022	FALSE
1305	PF3D7_0931300.1o1_6427	-0.0215847396666334	-0.0636273386384275	-0.0420425989717941	0.69288962587571	0.252722711844571	0.204389063059585	-0.0282751546506075	0.999805500558022	FALSE
1306	PF3D7_0931300_6263	-0.0257431248563747	-0.0487865929180458	-0.0230434680616711	0.801249730539036	0.303993502174238	0.159846874492523	-0.0131743878011582	0.999805500558022	FALSE
1307	PF3D7_0931400.3o4_4980	0.0718466358663013	-0.162130957010972	-0.233977592877274	0.0780809515397706	0.311958322411511	0.220639224116005	-0.128627042197377	0.999805500558022	FALSE
1308	PF3D7_0931600.iso1.exon2.amp1_2996	0.0338818087107165	0.2172862733126	0.183404464601884	0.761547402042562	0.264246384859227	1.25922988453045	0.0626239219094561	0.999805500558022	FALSE
1309	PF3D7_0931700.2o3_7353	0.0523728918243277	-0.00935182080576951	-0.0617247126300972	0.652789095429001	0.404429317153338	0.249381479642263	-0.0263607981325048	0.999805500558022	FALSE
1310	PF3D7_0931800.e1s1_7757	-0.0616714947060669	0.016915083994483	0.0785865787005499	0.49501383162729	0.2019957688725	0.225659150325518	0.0639663760157664	0.999805500558022	FALSE
1311	PF3D7_0932100.2o5_9117	-0.0865812277803057	-0.0196800430173944	0.0669011847629113	0.682128919750996	0.378390113054854	0.314779909441428	0.0299849304118897	0.999805500558022	FALSE
1312	PF3D7_0932300.e1s1_4887	0.014482089795616	0.155340407481063	0.140858317685447	0.649759453212672	0.196153702883513	0.639554361388546	0.0831843047700636	0.999805500558022	FALSE
1313	PF3D7_0932700.iso1.exon1.amp2_4526	-0.00878653204772631	-0.00850151563059818	0.000285016417128137	0.998384931577206	0.204910805433752	0.287582354685931	0.000220259425586463	0.999805500558022	FALSE
1314	PF3D7_0933100.4o4_8227	-0.0884381795018887	-0.0256590712571622	0.0627791082447265	0.673937587364066	0.183174687290315	0.303874400085367	0.0522605436720292	0.999805500558022	FALSE
1315	PF3D7_0933500.s1_5707	-0.0214173901056519	-0.021551869082926	-0.000134478977274068	0.998526166279478	0.187144638938288	0.138656074792961	-0.000122882754113663	0.999805500558022	FALSE
1316	PF3D7_0933600.e1s1_8054	-0.00595251725844481	0.131591120909893	0.137543638168338	0.32825170764689	0.219487209200217	0.269759090721167	0.10160114142757	0.999805500558022	FALSE
1317	PF3D7_0933900.4o4_5828	-0.0323167110974226	-0.118307972401668	-0.0859912613042449	0.853441409714056	0.407201362276828	0.966400194574669	-0.0285975291001479	0.999805500558022	FALSE
1318	PF3D7_0934300.1o1_7830	-0.0423633025322462	0.000405359134080285	0.0427686616663265	0.835806000008684	0.258560243035434	0.423529120017029	0.0253037269342873	0.999805500558022	FALSE
1319	PF3D7_0935600.1o2_7901	-0.0445939193348669	0.0018884081707558	0.0464823275056227	0.927106875873951	0.506464687433438	1.05338724986656	0.0130707092042156	0.999805500558022	FALSE
1320	PF3D7_0935800.e1_5085	-0.01119790342387	-0.0160490111958328	-0.00485110777196287	0.987091214857196	0.31951801490686	0.620762241355729	-0.0022123012654783	0.999805500558022	FALSE
1321	PF3D7_0935800.e2_5959	-0.0501386353800001	0.24144547642627	0.29158411180627	0.407082246698116	0.264149369831566	0.700329264884798	0.142369338900426	0.999805500558022	FALSE
1322	PF3D7_0935800.e9_9148	0.111067584510178	0.285875003368208	0.17480741885803	0.744507934648128	0.559652145187936	1.10356143643316	0.0452952141599988	0.999805500558022	FALSE
1323	PF3D7_0935900.e1s1_8599	-0.069398514342722	-0.214687052755173	-0.145288538412451	0.205840309476971	0.354074885223655	0.193801300513662	-0.0712160681084944	0.999805500558022	FALSE
1324	PF3D7_0935900.e2s1_9232	-0.0172332825327943	-0.10615355703593	-0.0889202745031357	0.77962531435655	0.555951430550898	0.637317027323439	-0.0262037151201593	0.999805500558022	FALSE
1325	PF3D7_0936200.2o2_4952	0.0276048417343002	-0.138123124275724	-0.165727966010024	0.209279312030556	0.520672863423008	0.196653305594155	-0.0557722248813672	0.999805500558022	FALSE
1326	PF3D7_0936300.2o2_8152	-0.0596314297121176	0.0609111677253395	0.120542597437457	0.316322305858774	0.285483138144682	0.221059113574911	0.0719931474580364	0.999805500558022	FALSE
1327	PF3D7_0936400.2o2_8989	0.0204445208220506	0.129998699618812	0.109554178796761	0.702167650273979	0.321107733431687	0.586575879870982	0.050664118130521	0.999805500558022	FALSE
1328	PF3D7_0936500.iso1.exon1.amp1_973	-0.0305251521555072	-0.052693117351652	-0.0221679651961448	0.949937021259927	0.302291444006004	0.734788227728157	-0.00983174947183491	0.999805500558022	FALSE
1329	PF3D7_0936600.2o2_6426	-0.0678314255398413	0.0262749606110603	0.0941063861509016	0.557932444557946	0.174649020371635	0.324941073350611	0.0795793372184592	0.999805500558022	FALSE
1330	PF3D7_0936700.1o1_7018	-0.0846767462275687	0.0104255923392532	0.0951023385668219	0.49026798755936	0.330034162265859	0.259901083154856	0.0490732514101036	0.999805500558022	FALSE
1331	PF3D7_0936800.e2s1_5455	-0.0764884430931444	0.0667033861655199	0.143191829258664	0.443281356448265	0.292359338159252	0.366215012083252	0.0791656407831012	0.999805500558022	FALSE
1332	PF3D7_0937000.2o2_6410	0.0679010174358911	-0.014987641856661	-0.0828886592925521	0.382310716699711	0.268448836308828	0.170125601852919	-0.05326256205935	0.999805500558022	FALSE
1333	PF3D7_0937200.1o1_7291	-0.0545228847344576	0.194974755541924	0.249497640276381	0.407237044178995	0.352078738695555	0.59418960872652	0.107576597077069	0.999805500558022	FALSE
1334	PF3D7_0937300.iso1.exon2.amp1_3309	-0.0292587331696052	0.0344030591841836	0.0636617923537888	0.892651467156109	0.649850898861444	0.965377845848386	0.0153316847951637	0.999805500558022	FALSE
1335	PF3D7_0937400.iso1.exon2.amp1_1296	-0.0995337127476357	0.0856749599688207	0.185208672716456	0.640034724104998	0.386709293995235	0.810187078259109	0.0680334103514065	0.999805500558022	FALSE
1336	PF3D7_0937500.iso1.exon1.amp1_4176	-0.128921149102702	0.115589100425732	0.244510249528434	0.666046049585637	0.653394094230161	1.15582072984602	0.0560867512313995	0.999805500558022	FALSE
1337	PF3D7_0937600.iso1.exon1.amp1_2479	-0.0486526226048362	0.13431244779517	0.182965070400006	0.178431296856787	0.180538576595072	0.248673079414494	0.161068859062582	0.999805500558022	FALSE
1338	PF3D7_0937600.iso1.exon2.amp1_3322	0.0560844565582182	0.00944422972334529	-0.0466402268348729	0.855346820111562	0.455866889757601	0.51360055210512	-0.0168022876156891	0.999805500558022	FALSE
1339	PF3D7_0937700.iso1.exon2.amp1_713	-0.145640070104953	0.182146152328698	0.327786222433651	0.386778330612953	0.670986550717733	0.729167234926885	0.0806126847378466	0.999805500558022	FALSE
1340	PF3D7_0937800.iso1.exon1.amp1_2169	-0.0652433173555439	-0.0556600589876783	0.0095832583678656	0.977096484722567	0.178882523796162	0.698948069816923	0.00555322152915758	0.999805500558022	FALSE
1341	PF3D7_0937800.iso1.exon2.amp1_1654	-0.0798827645576041	0.151640550117527	0.231523314675131	0.358730033666855	0.299748659985933	0.492634196601873	0.118057623932004	0.999805500558022	FALSE
1342	PF3D7_1000100.iso1.exon2.amp1_3908	-0.060727964018743	0.0805941633511093	0.141322127369852	0.467666545093672	0.371465572337329	0.376996895316972	0.0633020331134403	0.999805500558022	FALSE
1343	PF3D7_1000200.iso1.exon1.amp1_1575	0.0328939576028136	0.154593258692035	0.121699301089221	0.785075143535495	0.663166556777948	0.906077233907567	0.0292111395832516	0.999805500558022	FALSE
1344	PF3D7_1000300.iso1.exon1.amp1_3601	-0.0852432054474412	0.320906233415318	0.406149438862759	0.0678451842559291	0.226153791483849	0.368412318431146	0.275106385985027	0.999805500558022	FALSE
1345	PF3D7_1000400.iso1.exon1.amp1_1864	-0.152611257790092	0.160184500791869	0.312795758581961	0.191931216226663	0.655128403540012	0.415418058724757	0.0823589678311683	0.999805500558022	FALSE
1346	PF3D7_1000500.iso1.exon3.amp1_4465	-0.121099139251331	0.149264232466844	0.270363371718175	0.0524705578522414	0.36090690880574	0.223106304998993	0.129373390901668	0.999805500558022	FALSE
1347	PF3D7_1001300.2o2_6130	-0.0570042340938187	-0.0230346168068593	0.0339696172869594	0.869628715937602	0.370788507714056	0.415428277250503	0.015057042703621	0.999805500558022	FALSE
1348	PF3D7_1001500.1o1_6967	0.0461274257018444	0.0847202193433645	0.0385927936415201	0.965425154300517	0.209192161026409	1.86977097037419	0.00983929531352361	0.999805500558022	FALSE
1349	PF3D7_1001600.2o2_4757	0.0290013022631619	0.13738504446139	0.108383742198228	0.390910515846334	0.432494893907141	0.211641951570036	0.0436519513420859	0.999805500558022	FALSE
1350	PF3D7_1001700.2o2_9009	0.0499656015059972	0.0914691212725369	0.0415035197665397	0.945375192834359	0.344021656479412	1.26745555281797	0.012986980756397	0.999805500558022	FALSE
1351	PF3D7_1001900.2o2_7282	-0.000744689600864759	-0.0533861173621101	-0.0526414277612454	0.729272125133809	0.333278668888747	0.29647585391625	-0.0266356061982307	0.999805500558022	FALSE
1352	PF3D7_1002100.2o2_7048	-0.00810575430163119	0.132052180203196	0.140157934504827	0.361805954654681	0.28316634322616	0.293545056362653	0.0821544635472223	0.999805500558022	FALSE
1353	PF3D7_1002500.1o3_8986	-0.0526675258696188	-0.00707519392448788	0.0455923319451309	0.919851306215018	0.433185008894189	0.940308656593707	0.0147599040617096	0.999805500558022	FALSE
1354	PF3D7_1002800.e1s2_6354	-0.0477634942601301	-0.00176449690248823	0.0459989973576418	0.844896950417981	0.245453453643593	0.48589411858966	0.0271415277409711	0.999805500558022	FALSE
1355	PF3D7_1003100.iso1.exon3.amp1_38	-0.0566173302464808	0.111367790170943	0.167985120417423	0.114089858919417	0.230366763862815	0.183059008621719	0.124102058872922	0.999805500558022	FALSE
1356	PF3D7_1003400.iso1.exon1.amp3_seg2_2299	-0.0936119091200183	0.0407939534009923	0.134405862521011	0.477427806557155	0.448290166851507	0.356781533979852	0.0510196846023225	0.999805500558022	FALSE
1357	PF3D7_1003600.e1s1_8919	-0.0485842100368674	0.153614724643348	0.202198934680215	0.170936024629839	0.2597421638743	0.266383336251616	0.129371665404497	0.999805500558022	FALSE
1358	PF3D7_1003800.e1s2_7780	0.0459381258954268	0.0674314370325156	0.0214933111370888	0.937027735688339	0.368871149985682	0.557596810701683	0.00908439352786974	0.999805500558022	FALSE
1359	PF3D7_1004200.e2s2_6055	0.035695850501937	0.0743489133388835	0.0386530628369465	0.766953142476686	0.294017326562111	0.253549884696236	0.022229724625891	0.999805500558022	FALSE
1360	PF3D7_1004300.iso1.exon1.amp2_2505	-0.0409016415736164	-0.0167247601169901	0.0241768814566263	0.879665497661012	0.551894876384111	0.273842351097694	0.00762758374336532	0.999805500558022	FALSE
1361	PF3D7_1004800.2o3_6717	-0.077936467450408	0.00996911676700876	0.0879055842174168	0.286253545130672	0.3531351488017	0.114817071321379	0.0437169539177327	0.999805500558022	FALSE
1362	PF3D7_1005000.1o1_7075	-0.024005084754116	0.0299394890703546	0.0539445738244706	0.513783640328161	0.297439403172564	0.136310953056115	0.0316480614328402	0.999805500558022	FALSE
1363	PF3D7_1005300.2o2_8452	-0.00733111335377431	-0.0412167739192228	-0.0338856605654484	0.879217463776798	0.1994615651614	0.463061473607025	-0.0232135985469777	0.999805500558022	FALSE
1364	PF3D7_1005500.e2s1_9236	0.00385973726718872	0.146961867036675	0.143102129769487	0.415024990194003	0.212823808600063	0.346631586651304	0.10300660711882	0.999805500558022	FALSE
1365	PF3D7_1005700.iso1.exon2.amp1_3583	-0.0647161359715607	0.107203043653842	0.171919179625403	0.106471139667166	0.170343408375817	0.184712060072493	0.166589115875087	0.999805500558022	FALSE
1366	PF3D7_1006000.iso1.exon2.amp1_1866	-0.020431424106868	0.0458538398052138	0.0662852639120818	0.86998761343542	0.302769811278732	0.843477830625412	0.0275728352762213	0.999805500558022	FALSE
1367	PF3D7_1006500.1o1_7278	-0.0405176394276285	0.105987302746924	0.146504942174552	0.779469285136251	0.38438389476812	1.08620807726321	0.0476645600583556	0.999805500558022	FALSE
1368	PF3D7_1007000.iso1.exon8.amp1_631	-0.130576091460094	-0.0545260351567929	0.0760500563033009	0.572275801851581	0.413756073632878	0.240128823037179	0.0318291404461222	0.999805500558022	FALSE
1369	PF3D7_1007300.iso1.exon1.amp1_3315	-0.0913497934588921	0.308373151013602	0.399722944472494	0.388766952195873	0.21048570982522	0.923390740461967	0.18191155063062	0.999805500558022	FALSE
1370	PF3D7_1007700.e1s1_6640	-0.201916662045764	0.0207427498976646	0.222659411943429	0.161933696174982	0.713825510256542	0.203613807024832	0.054862636352492	0.999805500558022	FALSE
1371	PF3D7_1007700.e1s2_8091	-0.13949466652878	0.102635255748898	0.242129922277678	0.222236077530822	0.58054415259004	0.341400482087999	0.0721852635855685	0.999805500558022	FALSE
1372	PF3D7_1007800.iso1.exon1.amp1_1414	-0.140724042345251	0.0651874054373703	0.205911447782622	0.307315229106006	0.583207468860452	0.355095621662291	0.0610163248898083	0.999805500558022	FALSE
1373	PF3D7_1008000.s2_8597	-0.0910174499482263	0.0310853141611922	0.122102764109419	0.211139448953944	0.412765265237056	0.136361637550924	0.0519403648638628	0.999805500558022	FALSE
1374	PF3D7_1008100.s1_7726	-0.119111056523089	0.0377993526893679	0.156910409212457	0.544089502404784	0.380615098040284	0.515963452093676	0.0657188232567651	0.999805500558022	FALSE
1375	PF3D7_1008100.s3_5986	-0.0500252924162635	0.105644113418884	0.155669405835148	0.391906799212991	0.47487730770867	0.332773586459005	0.0562484930124906	0.999805500558022	FALSE
1376	PF3D7_1008200.iso1.exon1.amp1_2743	0.00861213702301445	0.0574755913390923	0.0488634543160779	0.789349080296374	0.289995533577504	0.369839927617992	0.027153725378674	0.999805500558022	FALSE
1377	PF3D7_1008400.e1s1_5157	0.0941633331665163	0.0707737397867046	-0.0233895933798117	0.952649255290711	0.279624819496876	0.8222686910241	-0.0102505274379005	0.999805500558022	FALSE
1378	PF3D7_1008600.1o1_6726	-0.072181122309002	-0.0468508894342722	0.0253302328747298	0.814046857684241	0.343904781523083	0.191368069926792	0.0127755547146655	0.999805500558022	FALSE
1379	PF3D7_1008700.e3s1_6589	-0.038751862198181	0.0734732482172472	0.112225110415428	0.206612599628169	0.226569015933392	0.156790612767605	0.085053058094398	0.999805500558022	FALSE
1380	PF3D7_1008800.e1s1_8915	-0.0953982986103949	-0.0135267611377859	0.081871537472609	0.104423441804484	0.224903998911318	0.063754823195107	0.0640310256846863	0.999805500558022	FALSE
1381	PF3D7_1009000.1o1_8727	-0.0714813402896498	0.341283152531423	0.412764492821073	0.385169687077458	0.291947320019226	0.943919238796475	0.164561698254089	0.999805500558022	FALSE
1382	PF3D7_1009300.iso1.exon1.amp1_1604	-0.0365404297705692	0.133928287323106	0.170468717093675	0.197952465897291	0.167810881081295	0.244819725605842	0.159596817825929	0.999805500558022	FALSE
1383	PF3D7_1009500.e3_5958	0.0140662948130945	0.0995504956942021	0.0854842008811077	0.84283239365075	0.276886607845613	0.898937380194424	0.0358504788531121	0.999805500558022	FALSE
1384	PF3D7_1009600.iso1.exon3.amp1_2459	-0.0432936688292781	0.184262544564537	0.227556213393815	0.457123085920624	0.465364331693108	0.60235775240667	0.0786014887499454	0.999805500558022	FALSE
1385	PF3D7_1010200.iso1.exon1.amp2_1917	0.0310234193760058	0.0622705671771921	0.0312471478011864	0.839374862655203	0.154671197592634	0.318868643339455	0.0288602542190155	0.999805500558022	FALSE
1386	PF3D7_1010900.iso1.exon2.amp1_108	-0.0962659806928354	0.113473123606786	0.209739104299622	0.405208095394126	0.256840335564798	0.498980619044128	0.118992042152923	0.999805500558022	FALSE
1387	PF3D7_1011300.1o1_5319	-0.0218340437556276	0.0927396170371871	0.114573660792815	0.195971132516413	0.294669853014004	0.14512192002729	0.067715546900668	0.999805500558022	FALSE
1388	PF3D7_1011400.1o1_6697	0.0102977263777265	-0.0115993687881904	-0.0218970951659169	0.898879609900773	0.2771519936663	0.349242549749777	-0.0127578401965183	0.999805500558022	FALSE
1389	PF3D7_1011500.1o1_7558	0.012466528830984	-0.149842911189492	-0.162309440020476	0.38755587242212	0.208475040325535	0.36986779982818	-0.116591870418397	0.999805500558022	FALSE
1390	PF3D7_1011700 (renamed)_6433	-0.0187813562831295	0.159460656675911	0.178242012959041	0.459765873910402	0.528645240139027	0.459153134883471	0.0569774776130245	0.999805500558022	FALSE
1391	PF3D7_1011800.e1s2_7200	-0.0170844168194729	0.239511907776187	0.25659632459566	0.349505773048391	0.170093225539324	0.540063965434695	0.177385714008034	0.999805500558022	FALSE
1392	PF3D7_1011900.iso1.exon4.amp1_2357	-0.091508835625366	0.0629145294488453	0.154423365074211	0.158541904980105	0.370415576625169	0.176089680350089	0.072677450678263	0.999805500558022	FALSE
1393	PF3D7_1012000.iso1.exon1.amp1_2737	-0.0427595482870973	0.0937856175849099	0.136545165872007	0.0179401722301036	0.217710163708337	0.078817743815152	0.109974977504756	0.999805500558022	FALSE
1394	PF3D7_1012000.iso1.exon9.amp1_3295	-0.0256795256299679	0.0374062744613099	0.0630858000912778	0.367694576114181	0.146741810823862	0.132211336924019	0.0724129638803726	0.999805500558022	FALSE
1395	PF3D7_1012100.iso1.exon1.amp1_2444	-0.0061371436849145	0.169630692981316	0.175767836666231	0.295862925433332	0.139369083684263	0.325217057834479	0.171972637671379	0.999805500558022	FALSE
1396	PF3D7_1012200.1o2_8148	0.0360587972447721	-0.0274634665796214	-0.0635222638243935	0.923163253409594	0.694959377700422	1.36315904373839	-0.0132777323265842	0.999805500558022	FALSE
1397	PF3D7_1012400.e3s1_5724	-0.0503161213683202	0.002320137897172	0.0526362592654922	0.53854536414729	0.309376338067383	0.141123928932563	0.0296925281932259	0.999805500558022	FALSE
1398	PF3D7_1012500.e1s1_9230	-0.0171142857212446	0.0553105449613192	0.0724248306825638	0.717386488648195	0.360447965440031	0.39896141281634	0.0330772225417419	0.999805500558022	FALSE
1399	PF3D7_1012600.e1s1_9222	-0.0620915882732714	0.132715733084769	0.194807321358041	0.276882454664906	0.354571026768427	0.333328401734501	0.0921665722385671	0.999805500558022	FALSE
1400	PF3D7_1012700.e1s1_7980	-0.0946597898270993	0.0713163995706683	0.165976189397768	0.70331190061053	0.267288987356915	0.902551765270861	0.0704873467044953	0.999805500558022	FALSE
1401	PF3D7_1012700.e1s2_6240	-0.107239201766976	0.134548647608965	0.24178784937594	0.499212435907593	0.417086730757854	0.717001827986402	0.0875725158337215	0.999805500558022	FALSE
1402	PF3D7_1013100.1o2_5076	0.0370539310469445	0.0837024642976076	0.0466485332506631	0.841176824530504	0.143795214552506	0.485534613517942	0.0368255282437822	0.999805500558022	FALSE
1403	PF3D7_1013100.2o2_4787	-0.0108769988989617	-0.019194946602504	-0.0083179477035423	0.922360527572269	0.233481004286948	0.160003685712547	-0.00612071826164706	0.999805500558022	FALSE
1404	PF3D7_1013200.iso1.exon1.amp1_4310	-0.0208524986203162	0.0610645127476221	0.0819170113679383	0.72735488515133	0.278749144504067	0.480863533247358	0.0443517463266586	0.999805500558022	FALSE
1405	PF3D7_1013200.iso1.exon1.amp2_2506	-0.0468493523852711	0.0444450752198318	0.0912944276051029	0.733625362068009	0.359069184280938	0.546411093830053	0.0395809976867408	0.999805500558022	FALSE
1406	PF3D7_1013400.iso1.exon9.amp1_3307	-0.0465697704718664	0.0892298400321803	0.135799610504047	0.448598053726201	0.328746253788233	0.347576088435225	0.0684009012272747	0.999805500558022	FALSE
1407	PF3D7_1013700.iso1.exon1.amp1_3828	-0.00614519836173013	-0.0222618713929741	-0.016116673031244	0.889688416841961	0.232279302614319	0.230609906806078	-0.0115733601889841	0.999805500558022	FALSE
1408	PF3D7_1013900.iso1.exon1.amp2_seg2_4622	-0.161619353352445	0.0171409665329808	0.178760319885426	0.550899734463644	0.455107788717844	0.597253058456607	0.0629860208546973	0.999805500558022	FALSE
1409	PF3D7_1014000.iso1.exon6.amp1_1249	-0.0943138924508836	-0.00351254986022411	0.0908013425906595	0.454493300036787	0.190155848420872	0.238442134077061	0.0771691143408496	0.999805500558022	FALSE
1410	PF3D7_1014000.iso1.exon7.amp1_955	-0.0384319512173309	0.057865959708942	0.0962979109262729	0.347613515836148	0.273414375239406	0.185476954095454	0.0605446071976969	0.999805500558022	FALSE
1411	PF3D7_1014100.s1_5371	0.0421357485879434	0.288904138507228	0.246768389919284	0.252381536031256	0.497551656878527	0.39163704808735	0.0844653382716837	0.999805500558022	FALSE
1412	PF3D7_1014100.s2_5660	-0.0850312766140965	0.0251247898658352	0.110156066479932	0.501162240813441	0.422290372142286	0.304693103795231	0.0446819577769	0.999805500558022	FALSE
1413	PF3D7_1014300.e1s3_6628	-0.0445532922566942	0.0912905136077828	0.135843805864477	0.0974474771653081	0.189414971530298	0.138677694478175	0.122734799065877	0.999805500558022	FALSE
1414	PF3D7_1014500.iso1.exon1.amp2_3369	-0.0688629489691524	0.0917356872685378	0.16059863623769	0.258220645809405	0.349387513718104	0.256011099608298	0.0786600256370304	0.999805500558022	FALSE
1415	PF3D7_1014600 (renamed, has duplicates)_5653	-0.0274857817734117	-0.0277543446498321	-0.000268562876420325	0.999324705499843	0.32995658329276	0.657459967633826	-0.000117626827932343	0.999805500558022	FALSE
1416	PF3D7_1014600.e1s2_7100	-0.112694069097768	0.215924462940449	0.328618532038217	0.330058701585374	0.395188311016815	0.654592627111986	0.12684733836947	0.999805500558022	FALSE
1417	PF3D7_1014600.e1s3_8257	-0.0908441752924565	0.0472525264911262	0.138096701783583	0.660260406800081	0.418312027984717	0.636931744741383	0.0513862762582978	0.999805500558022	FALSE
1418	PF3D7_1014800.6o11_8787	-0.0933317498900353	0.100197336585119	0.193529086475154	0.357285196784266	0.344762278349355	0.404580447805445	0.0916562070747063	0.999805500558022	FALSE
1419	PF3D7_1014800.7o11_8498	-0.0180778841228351	0.00881273754110126	0.0268906216639364	0.696209126192585	0.141515449944115	0.135192369851011	0.031824673281627	0.999805500558022	FALSE
1420	PF3D7_1014900.iso1.exon1.amp1_3710	-0.00569840339625248	0.0996097575964651	0.105308160992718	0.500170401799899	0.274990858368923	0.306141867361768	0.0629929667842761	0.999805500558022	FALSE
1421	PF3D7_1015100.1o1_9044	-0.0321295522535352	-0.158996963254107	-0.126867411000572	0.860266654605033	0.51497432242369	1.50155822514873	-0.0303227265399269	0.999805500558022	FALSE
1422	PF3D7_1015200.iso1.exon3.amp1_1792	-0.0533594525218434	0.034957815246581	0.0883172677684244	0.326685207221082	0.241775461156583	0.162035628980534	0.0628342970472561	0.999805500558022	FALSE
1423	PF3D7_1015500.1o1_8772	-0.0302399084447595	0.151786442521482	0.182026350966242	0.838073579184944	0.387854207190614	1.86222601863868	0.0421098661884692	0.999805500558022	FALSE
1424	PF3D7_1015900.e2s1_5752	-0.0312102699123954	0.0644611010856494	0.0956713709980448	0.607997503264379	0.332259961645283	0.369376654101672	0.0473733843249205	0.999805500558022	FALSE
1425	PF3D7_1016000.iso1.exon1.amp1_1018	-0.0116735041416292	0.000343810580767112	0.0120173147223963	0.877153567079296	0.142281215776104	0.155751672614032	0.0139243771519376	0.999805500558022	FALSE
1426	PF3D7_1016200.1o1_8491	-0.0386449321511338	0.0318436802336805	0.0704886123848143	0.677075592876244	0.529330118633529	0.301729269973843	0.0230766213139327	0.999805500558022	FALSE
1427	PF3D7_1016300.e1s1_5130	0.0659593086198498	-0.0712811699039165	-0.137240478523766	0.577022707357603	0.586812061405993	0.468235049412412	-0.0397905063759909	0.999805500558022	FALSE
1428	PF3D7_1016500.e1s1_7472	-0.0564090975705113	0.099244099448952	0.155653197019463	0.284070033068587	0.318900189361471	0.267907348751877	0.0827122470530576	0.999805500558022	FALSE
1429	PF3D7_1016500.e2s1_8376	-0.0738702807556748	0.101189980596699	0.175060261352374	0.283764559431257	0.273857785408858	0.308235738096038	0.104994623530054	0.999805500558022	FALSE
1430	PF3D7_1016700.iso1.exon2.amp1_3820	-0.0570899431237205	-0.00212445851202929	0.0549654846116912	0.721136568937491	0.228269150629595	0.31168067493313	0.0383335295458978	0.999805500558022	FALSE
1431	PF3D7_1016900.e1s1_4855	-0.0192613877824055	0.0277156874677157	0.0469770752501212	0.817308817885154	0.265190798939436	0.416359485422804	0.0273796281636682	0.999805500558022	FALSE
1432	PF3D7_1017000.e1s1_7482	-0.04941728152309	-0.00620778836903497	0.0432094931540551	0.926339831780341	0.243961573931602	0.978310625102132	0.0180464291366206	0.999805500558022	FALSE
1433	PF3D7_1017000.e1s2_7193	-0.0479224469790185	0.0915066898240209	0.139429136803039	0.496939005540136	0.231705675100898	0.411574052813145	0.0900842348297506	0.999805500558022	FALSE
1434	PF3D7_1017100.1o1_6988	-0.00328588733691159	-0.0620919338817714	-0.0588060465448598	0.883325026903707	0.303761585123958	0.83469509882503	-0.0245461556233468	0.999805500558022	FALSE
1435	PF3D7_1017300.1.2o2_6764	-0.066581929979401	0.0437141239489048	0.110296053928306	0.256586314255675	0.453246664511841	0.118522876009522	0.0428353347172777	0.999805500558022	FALSE
1436	PF3D7_1017800.iso1.exon3.amp1_1681	0.00404981485204973	0.0287746367067726	0.0247248218547229	0.890072038237815	0.211171181828662	0.368616618910037	0.0176134826286118	0.999805500558022	FALSE
1437	PF3D7_1017800.iso1.exon3.amp2_1970	0.0100977526363948	0.0552785889744879	0.0451808363380931	0.561161232840806	0.235119864361201	0.139280592128717	0.0332481819674193	0.999805500558022	FALSE
1438	PF3D7_1017900.e2s1_5746	-0.0757898031168366	-0.028545420504588	0.0472443826122485	0.518694911064571	0.248131518435523	0.124796864818646	0.0331385504316747	0.999805500558022	FALSE
1439	PF3D7_1018000.1o1_8202	-0.0596781293340968	-0.0512769578030124	0.00840117153108446	0.938105280084768	0.255644501422743	0.209553974223969	0.00557976254962759	0.999805500558022	FALSE
1440	PF3D7_1018100.1o1_6997	-0.0289173103182632	0.0682979624479387	0.0972152727662019	0.319955232768522	0.218858945151014	0.181274891893685	0.0753580057812641	0.999805500558022	FALSE
1441	PF3D7_1018300.e1s1_5945	-0.0644913068903833	0.112631179246909	0.177122486137292	0.62916689932854	0.436509796995797	0.745181625415659	0.0614117529419918	0.999805500558022	FALSE
1442	PF3D7_1018300.e2s2_5481	-0.103597073707213	0.0330469448310858	0.136644018538299	0.446767025063341	0.355477491681783	0.345670554300368	0.0642605074025104	0.999805500558022	FALSE
1443	PF3D7_1019000.e1s1_6639	-0.0589530516322968	0.00634136443341369	0.0652944160657105	0.422053216871464	0.297134706683247	0.131933068933395	0.0383761300871515	0.999805500558022	FALSE
1444	PF3D7_1019000.e1s2_6350	-0.0565770733344864	-0.040513818046669	0.0160632552878174	0.875445679080111	0.341067368514896	0.179054985894902	0.00818584333713516	0.999805500558022	FALSE
1445	PF3D7_1019300.iso1.exon1.amp2_1043	-0.0867048562129022	0.045194047467999	0.131898903680901	0.307190259323371	0.471339931060302	0.206734222617528	0.0488845874654819	0.999805500558022	FALSE
1446	PF3D7_1019400.e2s1_9178	-0.02705585003582	-0.0683020536947812	-0.0412462036589612	0.627653583856568	0.283149108875336	0.147263354916737	-0.0253263753786729	0.999805500558022	FALSE
1447	PF3D7_1019500.1.6o25_6176	-0.018850556133131	0.289984658684665	0.308835214817796	0.409635457902934	0.249898147810222	0.747143441295315	0.150138389873445	0.999805500558022	FALSE
1448	PF3D7_1019500.1.9o25_6465	-0.051090230171154	0.0445127051105352	0.0956029352816893	0.163028672272548	0.29863215235932	0.0912710993092907	0.0562650741172169	0.999805500558022	FALSE
1449	PF3D7_1020200.e2s1_4857	-0.0191799123026519	0.0474446882442905	0.0666246005469424	0.373545200471402	0.261431461379649	0.123938689297472	0.044430933801567	0.999805500558022	FALSE
1450	PF3D7_1020200.e3s1_5754	-0.00480257793724642	-0.106339860504363	-0.101537282567116	0.128974132724646	0.104837138749702	0.118146694476465	-0.159052276638158	0.999805500558022	FALSE
1451	PF3D7_1020300.e1s1_7784	-0.0113548225266893	0.0382156196802033	0.0495704422068926	0.851772309223494	0.238217031989854	0.550415001079349	0.028488091673387	0.999805500558022	FALSE
1452	PF3D7_1020500.1o1_4727	0.0384842155191243	-0.0698357826945593	-0.108319998213684	0.133775498197773	0.184198787226808	0.123672198529074	-0.10114474512993	0.999805500558022	FALSE
1453	PF3D7_1020700.e1s1_7201	-0.0195539928686901	0.0845177967634633	0.104071789632153	0.715809841663987	0.331574426033092	0.585109860167137	0.0470747064826934	0.999805500558022	FALSE
1454	PF3D7_1020700.e1s2_8363	-0.0575496597841171	-0.0381227091824396	0.0194269506016775	0.956194818471167	0.273116162355118	0.737423080426519	0.00909537992506131	0.999805500558022	FALSE
1455	PF3D7_1020800.11o11_6470	-0.106130013253197	-0.013999065752499	0.0921309475006975	0.656885839652315	0.292112352887649	0.419171877509147	0.049721628078612	0.999805500558022	FALSE
1456	PF3D7_1021000.iso1.exon2.amp1_3284	-0.0825766284761658	0.144044928730588	0.226621557206754	0.00538236211923767	0.264860590508261	0.110818536831628	0.149626449960728	0.999805500558022	FALSE
1457	PF3D7_1021000.iso1.exon4.amp1_1510	-0.096198077912696	0.115797733521903	0.211995811434599	0.431236248659684	0.325938247747353	0.533363125192893	0.0995225328615522	0.999805500558022	FALSE
1458	PF3D7_1021200.1o1_6485	-0.182902299402195	-0.0138463426532038	0.169055956748991	0.331409828190572	0.443929115201806	0.316837429494285	0.0652736321506546	0.999805500558022	FALSE
1459	PF3D7_1021500.iso1.exon1.amp1_154	-0.209836061014515	0.305639966394278	0.515476027408793	0.105138334659384	0.514919910272955	0.550938056783874	0.165520542884662	0.999805500558022	FALSE
1460	PF3D7_1021600.e1s1_6028	0.0232731982263296	0.0601204441233136	0.036847245896984	0.762414587250298	0.231753253634333	0.242271844817404	0.0263632874360944	0.999805500558022	FALSE
1461	PF3D7_1021700.e1s2_6931	-0.0842886309110305	-0.0247931738068115	0.0594954571042191	0.861189939674501	0.376305042024771	0.702211472180235	0.0233292569948544	0.999805500558022	FALSE
1462	PF3D7_1021700.e1s3_8087	0.0195504395075827	0.11890914237257	0.0993587028649872	0.362058356100775	0.297122746028001	0.196699515754905	0.0575590330335382	0.999805500558022	FALSE
1463	PF3D7_1021700.e2s2_7510	0.0130401423793544	0.0592600623372572	0.0462199199579028	0.824039644840571	0.182301375632451	0.431082115740237	0.0343853245250001	0.999805500558022	FALSE
1464	PF3D7_1021700.e3s1_8324	-0.0732576796624882	-0.0310423961916847	0.0422152834708035	0.910137796101409	0.314839631215312	0.77820974554454	0.0178481244944518	0.999805500558022	FALSE
1465	PF3D7_1021800.iso1.exon2.amp1_3703	-0.0595089515306315	0.225769696315583	0.285278647846214	0.00745336164939223	0.326189974148839	0.148955379197116	0.152628605115914	0.999805500558022	FALSE
1466	PF3D7_1021900.e1s2_5472	-0.000128090857927101	-0.167874627174054	-0.167746536316127	0.564407015212403	0.425671539877465	0.582130323468592	-0.0627170576232042	0.999805500558022	FALSE
1467	PF3D7_1021900.e1s3_6056	0.0620908618091462	0.207129905650768	0.145039043841622	0.775765060094107	0.41016867383075	1.0554039212968	0.0462387869082844	0.999805500558022	FALSE
1468	PF3D7_1022000.e2_4806	-0.0489819152080933	-0.191728959418858	-0.142747044210765	0.80855269901985	0.429067799606688	1.22487207204978	-0.0413934861899295	0.999805500558022	FALSE
1469	PF3D7_1022200.e2s1_5154	-0.045119325253474	0.0647389290457113	0.109858254299185	0.152823349596123	0.20454091884993	0.131835298070079	0.0925729731899891	0.999805500558022	FALSE
1470	PF3D7_1022300.2o6_4974	-0.117563190049953	-0.0735728612977237	0.043990328752229	0.639367947673748	0.449982570743219	0.11141213199356	0.0172158681446261	0.999805500558022	FALSE
1471	PF3D7_1022700.1o1_7854	0.0143668385518691	0.0784340229447928	0.0640671843929237	0.617119492241066	0.336654790991687	0.23984133894774	0.0326226020602655	0.999805500558022	FALSE
1472	PF3D7_1023100.e1s3_6525	-0.046881521540926	-0.0700564137239496	-0.0231748921830236	0.969242813839103	0.16238431981899	1.26198211487994	-0.00862827245514428	0.999805500558022	FALSE
1473	PF3D7_1023100.e1s4_6236	-0.0181082147427825	0.0483216486060996	0.0664298633488821	0.76393071099713	0.270864390678557	0.453053176119401	0.0373178553928685	0.999805500558022	FALSE
1474	PF3D7_1023100.e1s6_5941	-0.0476645715630185	0.257231558368438	0.304896129931457	0.502062161213987	0.568355649537028	0.908230979269424	0.0825660472621269	0.999805500558022	FALSE
1475	PF3D7_1023200.1o1_6706	0.0360038019159387	0.0277345437756559	-0.00826925814028287	0.97107270436442	0.261114611238223	0.470959174412045	-0.00472028599949683	0.999805500558022	FALSE
1476	PF3D7_1023900.s3_8307	-0.0427556687297514	0.118868608993545	0.161624277723297	0.525234796325794	0.319180985092077	0.51018260017294	0.0779313362147409	0.999805500558022	FALSE
1477	PF3D7_1024000.iso1.exon1.amp1_1314	-0.0451577523834915	0.0765460102149866	0.121703762598478	0.152788854872612	0.306628430988523	0.132573816645304	0.0693586955938338	0.999805500558022	FALSE
1478	PF3D7_1024300.1o1_7540	-0.0388302863096626	0.115328905462582	0.154159191772245	0.457623898908014	0.230276066829692	0.413939699556665	0.0998793521303366	0.999805500558022	FALSE
1479	PF3D7_1024400.1o2_7617	-0.0306321521168189	0.146040415869304	0.176672567986123	0.178832993873469	0.275813890952642	0.235097773900363	0.108418084816234	0.999805500558022	FALSE
1480	PF3D7_1024800.e2s2_5767	-0.0113111926658832	-0.00777540447108009	0.00353578819480314	0.987085648205055	0.339813063689203	0.444226496697096	0.00166966788463839	0.999805500558022	FALSE
1481	PF3D7_1026500.iso1.exon1.amp1_1214	-0.0554727544553682	-0.0749214587188707	-0.0194487042635025	0.902650906191044	0.209315146156934	0.326207001279053	-0.0143861177318112	0.999805500558022	FALSE
1482	PF3D7_1026900.1o1_7582	-0.0532952213687134	0.166607772762052	0.219902994130766	0.0446222907046934	0.282432355452589	0.173359768117292	0.134508148970417	0.999805500558022	FALSE
1483	PF3D7_1027000.iso1.exon1.amp2_seg1_3452	-0.0563160719255174	0.0886036105207918	0.144919682446309	0.19647304216193	0.463031019092832	0.160137587297558	0.0549186325925592	0.999805500558022	FALSE
1484	PF3D7_1027400.iso1.exon1.amp1_87	-0.0893787527291418	-0.0440668820600614	0.0453118706690805	0.535010946131589	0.225029651769578	0.129728766121592	0.0348785601496553	0.999805500558022	FALSE
1485	PF3D7_1028000.iso1.exon2.amp1_1224	-0.0555006045929055	0.106019946516888	0.161520551109793	0.0936848385618129	0.141869644411245	0.165290218482457	0.186093057094751	0.999805500558022	FALSE
1486	PF3D7_1028300.e1s1_5740	-0.062917682525409	0.0466848441013227	0.109602526626732	0.365947250568463	0.266021606368083	0.227486079194871	0.0697164124022707	0.999805500558022	FALSE
1487	PF3D7_1028700.1o1_8478	-0.0377604889952219	0.0937531868337139	0.131513675828936	0.798724655110468	0.295781384423026	1.07461041264827	0.0482843468675237	0.999805500558022	FALSE
1488	PF3D7_1028900.2o2_7542	-0.0374973758116603	0.0162155081764876	0.0537128839881479	0.625586024043156	0.148981895715047	0.222356012448004	0.0563675053191044	0.999805500558022	FALSE
1489	PF3D7_1029400.1o1_7611	-0.0118949242328414	0.0164034851443191	0.0282984093771604	0.839493461131919	0.333349748404854	0.269634235284389	0.0144283593336988	0.999805500558022	FALSE
1490	PF3D7_1029500.1o1_4650	0.0189998564657441	-0.00953524013923648	-0.0285350966049806	0.787404260202543	0.372089737457796	0.179372558254899	-0.0133640688013497	0.999805500558022	FALSE
1491	PF3D7_1030200.1o1_4717	0.463570522532742	0.6749503979948	0.211379875462058	0.651342702257282	0.866261772526412	0.9261851437008	0.0403493867699657	0.999805500558022	FALSE
1492	PF3D7_1030400.2o2_6704	-0.0159680569391315	-0.0199773596288445	-0.00400930268971303	0.979469218574307	0.477337231950037	0.282013471859994	-0.00145343287138976	0.999805500558022	FALSE
1493	PF3D7_1030500.1o1_4988	-0.0797151568452796	-0.074750721894484	0.00496443495079567	0.9659118052845	0.340296937441294	0.213530840571662	0.00251770089963532	0.999805500558022	FALSE
1494	PF3D7_1030700.iso1.exon1.amp1_391	-0.137925766718767	0.0127443869578034	0.150670153676571	0.683003601316341	0.352978190303434	0.757756558343595	0.0601058727958538	0.999805500558022	FALSE
1495	PF3D7_1030800.1o1_5237	-0.116751048245952	-0.0589782579251352	0.0577727903208168	0.748469487619353	0.409921568109747	0.349448047492077	0.0238543287351172	0.999805500558022	FALSE
1496	PF3D7_1031500.iso1.exon1.amp1_1891	0.0140379834381666	-0.0132185969987123	-0.027256580436879	0.84983280812405	0.307268689038402	0.282991268240893	-0.014910598098491	0.999805500558022	FALSE
1497	PF3D7_1031500.iso1.exon4.amp1_656	-0.0347145083749111	-0.0654044717197202	-0.0306899633448091	0.697457292411937	0.300346972392696	0.126851057544069	-0.0178652674326589	0.999805500558022	FALSE
1498	PF3D7_1031800.iso1.exon1.amp1_698	-0.0785948642244697	0.0649490768540616	0.143543941078531	0.0153136665303825	0.271669366468025	0.0653726103163059	0.093068593231739	0.999805500558022	FALSE
1499	PF3D7_1032100.iso1.exon1.amp1_3724	-0.0793343632384861	0.152804471735478	0.232138834973965	0.060942413067526	0.393314924507001	0.192903242330097	0.102801483934556	0.999805500558022	FALSE
1500	PF3D7_1032100.iso1.exon1.amp2_4232	-0.057196275028292	0.102145590531228	0.15934186555952	0.0998736354093716	0.401361497517599	0.133508865273575	0.0697005782408193	0.999805500558022	FALSE
1501	PF3D7_1032400.3o7_4720	-0.0589721962946069	0.0358366194332703	0.0948088157278772	0.83788064669445	0.22676673652594	0.968141478726327	0.040819131592918	0.999805500558022	FALSE
1502	PF3D7_1032900.e1s1_8259	-0.129292764564206	-0.00427497190358359	0.125017792660622	0.528676786597026	0.510852878675113	0.370351356673604	0.0419067614986057	0.999805500558022	FALSE
1503	PF3D7_1033700.e3s1_8911	-0.073210286647156	-0.063718145669262	0.00949214097789407	0.850312497759531	0.246864423803261	0.0565350544755333	0.00677503816386628	0.999805500558022	FALSE
1504	PF3D7_1033800.8o8_9037	-0.113376963618644	0.0642470404250584	0.177624004043703	0.0391407092280872	0.430705053866485	0.0786733109577549	0.0727516645856722	0.999805500558022	FALSE
1505	PF3D7_1034100.iso1.exon2.amp1_2074	-0.0716512486780175	-0.0712641620855493	0.000387086592468208	0.998355093203297	0.338923211661614	0.377207023714031	0.000187876303113397	0.999805500558022	FALSE
1506	PF3D7_1034500.iso1.exon2.amp2_seg1_573	-0.0438084228260592	-0.0592479590079524	-0.0154395361818932	0.962197059091634	0.275063624724173	0.678187296705079	-0.00747971426542857	0.999805500558022	FALSE
1507	PF3D7_1034700.1o1_4662	-0.0308131490171784	-0.170935634562998	-0.14012248554582	0.178579201104338	0.217470494129178	0.186417948461082	-0.109006093630582	0.999805500558022	FALSE
1508	PF3D7_1034900.e1s1_8260	-0.0679440878426431	0.135440453358203	0.203384541200846	0.493755169184882	0.336831540376664	0.595603638586312	0.0905089625122973	0.999805500558022	FALSE
1509	PF3D7_1035000.1o1_8245	-0.0260888229795806	-0.108457395170529	-0.0823685721909489	0.815079918164342	0.14728368273723	0.735800183061037	-0.0487075410312711	0.999805500558022	FALSE
1510	PF3D7_1035100.1o1_8208	-0.101957267659444	-0.119552156502401	-0.0175948888429569	0.975813099394141	0.371402430197152	1.21319595776015	-0.00548197869698857	0.999805500558022	FALSE
1511	PF3D7_1035200.1o1_4741	-0.0454863249077898	0.0101077134693085	0.0555940383770983	0.783624711302754	0.298285932729366	0.411254531848007	0.0296161394243389	0.999805500558022	FALSE
1512	PF3D7_1035300.iso1.exon1.amp1_2847	-0.00125352353105889	0.21576515041777	0.217018673948829	0.0648529243757123	0.272079317874759	0.192796356477995	0.136775399562796	0.999805500558022	FALSE
1513	PF3D7_1035300.iso1.exon1.amp2_3364	-0.0278760624493967	0.167285634792237	0.195161697241633	0.234787286967546	0.12779134906188	0.310981491228064	0.204650493004346	0.999805500558022	FALSE
1514	PF3D7_1035600.1o1_6162	0.0118944731506459	-0.169223978618663	-0.181118451769309	0.540612316169545	0.300581051011398	0.598730929434517	-0.0870894464059649	0.999805500558022	FALSE
1515	PF3D7_1035700.e1s1_8948	-0.0468740960592343	0.0562928270363482	0.103166923095583	0.645739610534858	0.274087549944884	0.456152176798729	0.0573480060223785	0.999805500558022	FALSE
1516	PF3D7_1035800.1o1_5041	-0.0476948986997766	-0.0100347064785744	0.0376601922212022	0.86128485595658	0.459765516898843	0.423817305277897	0.013767369122792	0.999805500558022	FALSE
1517	PF3D7_1035900.1o1_5890	0.159554825409862	0.590204999652368	0.430650174242506	0.506170066010545	0.495071971041424	1.31135746777093	0.112239427135146	0.999805500558022	FALSE
1518	PF3D7_1036000.1o1_5293	0.00539050390535382	0.0119527443640923	0.00656224045873846	0.980301643881147	0.534751347311574	0.527601600510858	0.00204828703586023	0.999805500558022	FALSE
1519	PF3D7_1036300.1o1_6786	-0.00714622235293289	0.100049674492519	0.107195896845452	0.828396604381226	0.267013855445137	1.03219981323487	0.0419065635980394	0.999805500558022	FALSE
1520	PF3D7_1036400.1o2_6117	0.0313419973386132	0.296756594452532	0.265414597113919	0.5533023942053	0.415012186741157	0.908910223551189	0.0893900417347251	0.999805500558022	FALSE
1521	PF3D7_1036400.e2s2_6540	0.0364466419025083	0.130572204511955	0.0941255626094469	0.864410983113264	0.419532543222758	1.14753946011232	0.0285102960566515	0.999805500558022	FALSE
1522	PF3D7_1036500.1o1_6762	-0.0991076635310094	0.130163027001254	0.229270690532263	0.238994167757778	0.536491935728862	0.341632423192031	0.073701028237872	0.999805500558022	FALSE
1523	PF3D7_1036600.iso1.exon3.amp1_3273	-0.0924675870120938	0.117967343626558	0.210434930638652	0.127972401819086	0.413784169670616	0.228631265078833	0.0882340801357384	0.999805500558022	FALSE
1524	PF3D7_1036600.iso2.exon3.amp1_3851	-0.102898695007181	0.035215799621491	0.138114494628672	0.76505987168144	0.364592322791204	0.95773677460691	0.0490684207125744	0.999805500558022	FALSE
1525	PF3D7_1036900.e1s2_5948	-0.0816183571681642	0.12557864721685	0.207197004385014	0.391780017878271	0.344027937305297	0.472552302985677	0.0957708144677823	0.999805500558022	FALSE
1526	PF3D7_1036900.e2s1_6576	-0.0532102909264368	0.0250928172950392	0.078303108221476	0.203157219159722	0.27395546332186	0.0802959254557417	0.0502579392486932	0.999805500558022	FALSE
1527	PF3D7_1037000.iso1.exon3.amp1_4275	-0.0654748648436996	0.16871387994107	0.23418874478477	0.680922764357857	0.377869007016952	1.17660233552086	0.0736650533866148	0.999805500558022	FALSE
1528	PF3D7_1037000.iso1.exon3.amp2_4564	-0.0016289358123883	0.0675523994677945	0.0691813352801828	0.910018796592906	0.302488906370999	1.28143749988165	0.0224497453188712	0.999805500558022	FALSE
1529	PF3D7_1037100.1o1_9098	0.0155761880042462	0.180648523948568	0.165072335944322	0.288135246517411	0.309503393827059	0.289832020353029	0.0895050702703593	0.999805500558022	FALSE
1530	PF3D7_1037200.10o12_7895	-0.0590010482387521	0.0629923899787183	0.12199343821747	0.168926196716844	0.25641716029172	0.150510138433867	0.0823489823955464	0.999805500558022	FALSE
1531	PF3D7_1037600.e2s1_7184	-0.0469274973866447	-0.0400521510259019	0.00687534636074283	0.987477031816448	0.324927151252898	0.914054472401096	0.00265213024162471	0.999805500558022	FALSE
1532	PF3D7_1037600.e3s1_6616	-0.0696749417341553	0.0923365849567233	0.162011526690879	0.571468456315131	0.329507341915071	0.579047605594218	0.0738280303776252	0.999805500558022	FALSE
1533	PF3D7_1038400.e1s1_8544	-0.0976769435790873	-0.0548632689034662	0.0428136746756211	0.804186339491412	0.279367875570314	0.348872848691324	0.0247832797164918	0.999805500558022	FALSE
1534	PF3D7_1038400.e3s1_7460	-0.067078146747059	0.128625444974218	0.195703591721277	0.736471343819454	0.262908023355775	1.20962733219509	0.0689137600999577	0.999805500558022	FALSE
1535	PF3D7_1038400.e7s1_7389	-0.0673878271186974	0.0366099104602252	0.103997737578923	0.503370794539452	0.3383729873605	0.297810372856599	0.0518781010421152	0.999805500558022	FALSE
1536	PF3D7_1038500.2o2_4992	0.04711940266703	-0.0125929791541719	-0.0597123818212019	0.866159926932358	0.319969964903584	0.735323966677026	-0.0256038488350492	0.999805500558022	FALSE
1537	PF3D7_1038600.2o2_8191	-0.0760162297650347	0.0861447115488016	0.162160941313836	0.482196899395572	0.283673342239252	0.460398145827065	0.0876491351473489	0.999805500558022	FALSE
1538	PF3D7_1038900.e1s1_9213	-0.0338811123076423	-0.0667972788501249	-0.0329161665424826	0.950451461081431	0.240040369944099	1.11011515447949	-0.0126476817871832	0.999805500558022	FALSE
1539	PF3D7_1039700.iso1.exon1.amp1_1851	-0.100504286839046	0.0958323904326772	0.196336677271724	0.697052068652228	0.585838479188971	1.03095088553434	0.0503029772945153	0.999805500558022	FALSE
1540	PF3D7_1039900.iso1.exon2.amp1_3588	-0.0452198309588302	-0.0124858398030124	0.0327339911558178	0.92893837299795	0.306411124536697	0.764046807287719	0.0141660744760095	0.999805500558022	FALSE
1541	PF3D7_1040000.iso1.exon2.amp1_1585	-0.171488866715874	0.183243318641157	0.354732185357031	0.699929785422994	0.50017235824196	1.90764068070781	0.0746814724712768	0.999805500558022	FALSE
1542	PF3D7_1040100.iso1.exon2.amp1_3299	-7.23748490718613e-05	0.0871186071584532	0.087190982007525	0.757508610899288	0.340572579355777	0.578567065164566	0.0387970608354647	0.999805500558022	FALSE
1543	PF3D7_1040200.iso1.exon2.amp1_408	-0.192839225438628	0.126892562067803	0.319731787506431	0.604726021696193	0.617835256020669	1.25877286398576	0.0742296985633796	0.999805500558022	FALSE
1544	PF3D7_1040300.iso1.exon2.amp1_997	-0.184019944044138	0.0649004873382967	0.248920431382435	0.592521667896214	0.650908918913777	0.935080816794917	0.0602740437123236	0.999805500558022	FALSE
1545	PF3D7_1040400.iso1.exon2.amp1_2156	-0.136726310820663	-0.00145008837473597	0.135276222445927	0.821361847774176	0.383745487801621	1.24819538934719	0.0408909642276521	0.999805500558022	FALSE
1546	PF3D7_1040500.iso1.exon2.amp1_2735	-0.0718764817448369	0.0128234651216726	0.0846999468665095	0.544909933534355	0.557267533196677	0.215059689143203	0.0266218989600379	0.999805500558022	FALSE
1547	PF3D7_1040600.iso1.exon2.amp1_2150	-0.115291490614024	-0.142317674604853	-0.0270261839908285	0.959491629770802	0.289451933455731	1.11389695821096	-0.00977510559084327	0.999805500558022	FALSE
1548	PF3D7_1040700.iso1.exon2.amp1_419	-0.153805687692141	0.0808584949044903	0.234664182596632	0.592725057245124	0.455192253781879	0.892097575161707	0.0749081840514428	0.999805500558022	FALSE
1549	PF3D7_1040900.iso1.exon2.amp1_2143	-0.0363384816376656	0.113579238519732	0.149917720157398	0.132724318893936	0.488005571528817	0.105200834252831	0.054149624372704	0.999805500558022	FALSE
1550	PF3D7_1041000.iso1.exon2.amp1_1280	-0.0876685114179648	0.157500430465969	0.245168941883933	0.273883057551435	0.498925603958649	0.411318542149768	0.0833966434944299	0.999805500558022	FALSE
1551	PF3D7_1041100.iso1.exon2.amp1_3013	-0.132618166530026	0.205260059714533	0.337878226244559	0.397841173242493	0.365112879196695	0.791942701525205	0.129813725216986	0.999805500558022	FALSE
1552	PF3D7_1041200.iso1.exon2.amp1_2153	-0.145184056224437	0.0792032985859244	0.224387354810361	0.122762004097456	0.582856472592139	0.208568965472824	0.0675170725444311	0.999805500558022	FALSE
1553	PF3D7_1041300.iso1.exon1.amp1_1293	-0.17148317565129	0.108668521188215	0.280151696839506	0.00438117880019965	0.429679668235679	0.111012731190137	0.114780771427286	0.999805500558022	FALSE
1554	PF3D7_1041300.iso1.exon2.amp1_498	-0.0759008367585011	-0.1060640206851	-0.030163183926599	0.913329855783417	0.205898853495493	0.577835873730596	-0.0183833156801116	0.999805500558022	FALSE
1555	PF3D7_1041300.iso1.exon2.amp2_787	-0.0907009118346097	-0.12829591712657	-0.0375950052919602	0.938958567201996	0.345444642332192	1.02479357622536	-0.0132757283910665	0.999805500558022	FALSE
1556	PF3D7_1100100.iso1.exon1.amp1_4545	-0.0500668822301677	0.202215415065179	0.252282297295346	0.218889121628919	0.249391271045661	0.383360070078006	0.157120989341361	0.999805500558022	FALSE
1557	PF3D7_1100100.iso1.exon2.amp1_1582	-0.175430786715174	0.0772010246530726	0.252631811368246	0.0575094313932857	0.450840076842543	0.202143312584856	0.0978365584533872	0.999805500558022	FALSE
1558	PF3D7_1100200.e1s1_7391	0.0206971971455929	0.135084636218919	0.114387439073326	0.399005804159862	0.241252323769208	0.261614997931006	0.0782621436481572	0.999805500558022	FALSE
1559	PF3D7_1100200.e1s2_8548	-0.0400628102745709	0.00281267870160811	0.042875488976179	0.589351453807345	0.187341436790246	0.151601419429412	0.0388969531783331	0.999805500558022	FALSE
1560	PF3D7_1100200.e1s3_7392	-0.00403962593313867	0.0527566890190645	0.0567963149522032	0.699793182989602	0.212682932905126	0.298190038076617	0.0422963848293995	0.999805500558022	FALSE
1561	PF3D7_1100300.iso1.exon2.amp1_4474	-0.109355126234039	0.23083389789261	0.340189024126649	0.363763642313068	0.402276919885208	0.734337990624789	0.125604875348136	0.999805500558022	FALSE
1562	PF3D7_1100400.iso1.exon2.amp1_3590	-0.223685670544816	0.198476307281112	0.422161977825928	0.657747700714244	0.60319696508238	1.96600148269527	0.0810894812009462	0.999805500558022	FALSE
1563	PF3D7_1100500.iso1.exon1.amp1_699	0.0200265177411075	-0.0842362570101319	-0.104262774751239	0.734070939978479	0.646335586753066	0.601760019914999	-0.0270867681330961	0.999805500558022	FALSE
1564	PF3D7_1100800.2o2_4959	-0.0107920722679458	-0.146612045094128	-0.135819972826182	0.111855913262735	0.254203441005652	0.14030875744477	-0.0927025008403215	0.999805500558022	FALSE
1565	PF3D7_1101100.iso1.exon1.amp1_3897	-0.159560460200701	0.0876455475685471	0.247206007769248	0.0448569440063397	0.424518063737855	0.183708329325109	0.101756773295076	0.999805500558022	FALSE
1566	PF3D7_1101200.iso1.exon1.amp1_3319	-0.0835845309828021	0.170793688479781	0.254378219462583	0.707363238724366	0.526894663979943	1.39967316359817	0.0622100123140676	0.999805500558022	FALSE
1567	PF3D7_1101300.iso1.exon1.amp1_2434	-0.078481124775828	0.0674216830541198	0.145902807829948	0.594416626053894	0.363590011119741	0.552441088781152	0.0624916421972299	0.999805500558022	FALSE
1568	PF3D7_1101500.iso1.exon1.amp1_3877	-0.0442676311035585	0.0500845827486735	0.094352213852232	0.745341265923309	0.220986346690101	0.601692487049087	0.0543759960826063	0.999805500558022	FALSE
1569	PF3D7_1101700.iso1.exon2.amp1_2140	-0.0961100282610775	0.135764459132506	0.231874487393583	0.670596398970172	0.595276387522473	1.11459269298026	0.0574175551316002	0.999805500558022	FALSE
1570	PF3D7_1102200.iso1.exon1.amp1_2170	-0.0612802475014599	0.304746725909812	0.366026973411272	0.127532454852385	0.663760390769349	0.404289787144239	0.0952979011711563	0.999805500558022	FALSE
1571	PF3D7_1102400.1o1_6766	-0.00572707540997304	0.0247399191217561	0.0304669945317291	0.783165510826601	0.246599340257648	0.215774511599864	0.0208648972008677	0.999805500558022	FALSE
1572	PF3D7_1102500.e2s1_5459	0.0766041909880938	0.160904501394802	0.0843003104067082	0.913234041011174	0.481082789364403	1.61666824511552	0.0199471828647052	0.999805500558022	FALSE
1573	PF3D7_1102700.iso1.exon1.amp1_375	-0.0814815933758147	-0.0556536589542219	0.0258279344215928	0.931323082075825	0.248417272692313	0.623943186397183	0.0137429746797489	0.999805500558022	FALSE
1574	PF3D7_1102800.iso1.exon1.amp1_671	-0.0174732655409031	0.0418434232328149	0.059316688773718	0.911748120138064	0.36158232852429	1.117257059823	0.0195808479552636	0.999805500558022	FALSE
1575	PF3D7_1103000.iso1.exon1.amp1_1212	-0.0551092097278685	-0.030617622952866	0.0244915867750026	0.747284416488201	0.208946941530713	0.141663263959307	0.0201499651288593	0.999805500558022	FALSE
1576	PF3D7_1103100.e2s1_8572	-0.131862740444092	-0.210223686099584	-0.0783609456554926	0.542534324769634	0.361323667947711	0.235437899470113	-0.0373593337938234	0.999805500558022	FALSE
1577	PF3D7_1103500.13o13_6965	-0.0432815705530821	0.15090752846485	0.194189099017932	0.50719378996841	0.2048114817528	0.59348695710327	0.117074150350996	0.999805500558022	FALSE
1578	PF3D7_1103500.1o13_8994	-0.0125925019369377	0.0882700783896176	0.100862580326555	0.86343281882531	0.282688415296368	1.2263032320627	0.0344490046542473	0.999805500558022	FALSE
1579	PF3D7_1103500.1o2_7831	-0.0441115894742113	0.0181145688695473	0.0622261583437586	0.903412653629892	0.286286667694587	1.07233481192082	0.0231544429931337	0.999805500558022	FALSE
1580	PF3D7_1103800.e1s1_7393	-0.209184743659135	0.218248226560754	0.427432970219889	0.292842835567203	0.740822002623175	0.764475928890238	0.0958171318767547	0.999805500558022	FALSE
1581	PF3D7_1104000.1o3_6466	-0.0752235101505251	-0.0265077901637806	0.0487157199867445	0.472375117367332	0.238002822235358	0.113067961850559	0.0356837771215223	0.999805500558022	FALSE
1582	PF3D7_1104100.4o4_7289	-0.129100076866995	-0.191851162126589	-0.0627510852595936	0.75462100253106	0.377984697076648	0.399343877532339	-0.027492224700001	0.999805500558022	FALSE
1583	PF3D7_1104200.e1s2_5379	-0.0446597494232193	-0.00864026137747409	0.0360194880457452	0.71206943283441	0.294722090451449	0.176494537578431	0.0211362288887249	0.999805500558022	FALSE
1584	PF3D7_1104800.2o9_8185	-0.0545486443874314	-0.021861873984475	0.0326867704029564	0.582270251661026	0.258443829471405	0.0833077242326693	0.0222140971764851	0.999805500558022	FALSE
1585	PF3D7_1105200.iso1.exon3.amp1_951	-0.0614634868240845	-0.00333099808017607	0.0581324887439084	0.575553494538652	0.271233108260777	0.193960503237874	0.0367321463145068	0.999805500558022	FALSE
1586	PF3D7_1105600.e1s1_6922	-0.0426981248701752	0.16135705565877	0.204055180528945	0.596964238635276	0.335327877641706	0.788216222863484	0.082732362043537	0.999805500558022	FALSE
1587	PF3D7_1105900.iso1.exon1.amp1_1541	-0.0543330519957533	-0.101594441503395	-0.047261389507642	0.494108728224071	0.219707075226379	0.120905445200214	-0.0373266735221973	0.999805500558022	FALSE
1588	PF3D7_1106100.iso1.exon4.amp1_381	-0.0241163926719115	0.00471136528716336	0.0288277579590748	0.630010103097902	0.104295516731432	0.11895983476151	0.0453159365031486	0.999805500558022	FALSE
1589	PF3D7_1106300.2o6_8231	-0.0976727308911366	0.0795965977016838	0.17726932859282	0.7645106860866	0.372597302103839	1.22985312877491	0.0547255950026203	0.999805500558022	FALSE
1590	PF3D7_1106700.iso1.exon1.amp2_772	0.00234331845157453	0.0565427580366904	0.0541994395851159	0.440841073715758	0.166074734074549	0.132071261829882	0.0555385848679754	0.999805500558022	FALSE
1591	PF3D7_1107400.iso1.exon1.amp1_3598	-0.0585833266439173	0.0856123731996757	0.144195699843593	0.769910400783184	0.303784266740162	1.02509237118279	0.0539021148269057	0.999805500558022	FALSE
1592	PF3D7_1107500.iso1.exon5.amp1_2058	-0.0369514002410279	-0.0413585583682124	-0.00440715812718449	0.977584584692075	0.22722627160074	0.320431446187576	-0.00306843701221269	0.999805500558022	FALSE
1593	PF3D7_1107600.iso1.exon1.amp1_seg2_2908	-0.0932496277946414	-0.0194652037161681	0.0737844240784732	0.452924443143007	0.412552113056223	0.142678563714449	0.0313825588413999	0.999805500558022	FALSE
1594	PF3D7_1107600.iso1.exon1.amp2_3661	-0.0469639136086845	0.0956067470370741	0.142570660645759	0.554375123122992	0.294884765667306	0.485760286429049	0.0738551761143728	0.999805500558022	FALSE
1595	PF3D7_1107800.e2s1_7678	-0.153330157371964	-0.140854748889122	0.0124754084828423	0.976390021400066	0.401509892750782	0.875403354600922	0.00435022675053097	0.999805500558022	FALSE
1596	PF3D7_1107900.iso1.exon1.amp1_542	-0.0888164762618184	-0.096595076386043	-0.00777860012422459	0.986188646378301	0.26649757434939	0.940121397374228	-0.00322766725053406	0.999805500558022	FALSE
1597	PF3D7_1108100.iso1.exon1.amp1_2831	-0.0364808260526367	0.0863465633340297	0.122827389386666	0.277210500332946	0.474314241479167	0.160969221678446	0.0454517020017633	0.999805500558022	FALSE
1598	PF3D7_1108600.e1s1_6906	-0.00323426246585251	-0.191702510286226	-0.188468247820373	0.572402923390201	0.258996865978129	0.681399377694625	-0.094189859208784	0.999805500558022	FALSE
1599	PF3D7_1109200.3o4_6218	-0.0326478114511229	0.295627499434532	0.328275310885655	0.506253412258218	0.50008240518156	0.994614073245687	0.0949245832878707	0.999805500558022	FALSE
1600	PF3D7_1110200.e1s1_4895	0.0334309106717967	0.237468657581184	0.204037746909388	0.817066088893532	0.489629302242933	1.83980471867591	0.0443025651603573	0.999805500558022	FALSE
1601	PF3D7_1110200.e1s2_6629	-0.0490194137550852	0.232878857303827	0.281898271058912	0.366231053692104	0.298587617347241	0.613520807078651	0.135026820196674	0.999805500558022	FALSE
1602	PF3D7_1110200.e2s1_6580	-0.0185651496436351	-0.00666450355020451	0.0119006460934306	0.762380324148927	0.11439280058134	0.0722309640984143	0.0179488133594337	0.999805500558022	FALSE
1603	PF3D7_1110400.e3s2_7791	-0.0657326466961978	0.193457600559113	0.259190247255311	0.288967202674649	0.230298859140016	0.470898573519438	0.161234117614726	0.999805500558022	FALSE
1604	PF3D7_1110700.e2s1_5162	-0.0270140808001562	-0.024627026153361	0.00238705464679526	0.979369153682095	0.388497922671542	0.135963047795019	0.00107795180854179	0.999805500558022	FALSE
1605	PF3D7_1111000.1o1_6758	-0.0491814021531506	0.0460568635648826	0.0952382657180333	0.406048069112276	0.317466548133383	0.207374259521249	0.0516719642871676	0.999805500558022	FALSE
1606	PF3D7_1111300.1o1_8154	-0.137793203200386	-0.0251106033380303	0.112682599862356	0.612122297348643	0.308316739312633	0.447814338968021	0.0574728321214564	0.999805500558022	FALSE
1607	PF3D7_1111400.iso1.exon1.amp1_2422	-0.0258551918456625	-0.0299139884914478	-0.00405879664578524	0.987272307013046	0.193284104803623	0.530733698354196	-0.00266347207769353	0.999805500558022	FALSE
1608	PF3D7_1111600.iso1.exon1.amp1_437	-0.0506910871790337	0.113425946945458	0.164117034124492	0.52520408158409	0.2669355088152	0.521254108647988	0.0894404693075508	0.999805500558022	FALSE
1609	PF3D7_1111800.iso1.exon1.amp1_2132	-0.0437710570361395	-0.116429164567291	-0.072658107531152	0.727235066669941	0.261602981058812	0.425346133182881	-0.0425663729837263	0.999805500558022	FALSE
1610	PF3D7_1111800.iso1.exon2.amp1_2710	0.00966471189168147	0.0743800176052385	0.0647153057135571	0.550392309571313	0.299257528993007	0.199309408676746	0.0372107810599152	0.999805500558022	FALSE
1611	PF3D7_1111900.iso1.exon1.amp1_693	-0.0568763529468959	0.0762391450959019	0.133115498042798	0.358379676454083	0.300124277412866	0.273498077487319	0.0746287931245214	0.999805500558022	FALSE
1612	PF3D7_1112100.iso1.exon1.amp1_1397	-0.0199358911605937	0.0130777921873769	0.0330136833479706	0.881758836394452	0.292295325330367	0.455131257431591	0.0174909596883703	0.999805500558022	FALSE
1613	PF3D7_1112100.iso1.exon1.amp2_1686	-0.0395696985048864	0.0297396622457185	0.069309360750605	0.458623441813028	0.208120212768673	0.177688030356403	0.0563594890981617	0.999805500558022	FALSE
1614	PF3D7_1112100.iso1.exon1.amp3_2210	0.0153887712185886	0.0641508408196437	0.048762069601055	0.74206503000844	0.123472540688354	0.306348769133085	0.0524823190047889	0.999805500558022	FALSE
1615	PF3D7_1112400.1o1_4663	0.0158795657101208	-0.180463154046894	-0.196342719757015	0.264240815983026	0.335967345423946	0.327031512151549	-0.0976869557429329	0.999805500558022	FALSE
1616	PF3D7_1113000.iso1.exon2.amp1_1889	-0.0349711915976788	-0.020511019419677	0.0144601721780018	0.803953451871077	0.284561581042946	0.0662658903326431	0.0089527247062409	0.999805500558022	FALSE
1617	PF3D7_1113000.iso1.exon3.amp1_1542	-0.106486153854302	0.0657999807155107	0.172286134569813	0.751605918173725	0.282013811406861	1.13228809311295	0.0621954478408264	0.999805500558022	FALSE
1618	PF3D7_1113000.iso1.exon5.amp1_118	-0.063694193003961	0.0777579485273247	0.141452141531286	0.349010945083012	0.229858145573741	0.29139946760847	0.0992709637736048	0.999805500558022	FALSE
1619	PF3D7_1113000.iso1.exon7.amp3_1351	-0.0693275132992489	0.140442882306822	0.209770395606071	0.474303302150514	0.353796319474592	0.584685785889354	0.0904979334349501	0.999805500558022	FALSE
1620	PF3D7_1113700.e1s1_8346	-0.146448850223299	-0.010697639154964	0.135751211068335	0.788921193973561	0.39542547329925	1.05225672915526	0.0442007273433121	0.999805500558022	FALSE
1621	PF3D7_1114500.iso1.exon1.amp1_3323	0.0395431592061597	0.0394050353133675	-0.000138123892792226	0.99965067642881	0.13899661633721	0.661437137133983	-8.97544757497807e-05	0.999805500558022	FALSE
1622	PF3D7_1114700.e1_8271	-0.0984329618390146	-0.181550161141025	-0.0831171993020102	0.717705374830868	0.353327051775863	0.464181218588201	-0.0377153904487082	0.999805500558022	FALSE
1623	PF3D7_1114900.e1s1_7681	-0.0574068230601526	0.0115942097996722	0.0690010328598248	0.365572939315286	0.231342671815443	0.13364061144214	0.0516595636319471	0.999805500558022	FALSE
1624	PF3D7_1114900.e1s2_9122	-0.0352760415520171	-0.0472745902963453	-0.0119985487443282	0.919667828226591	0.406699137723006	0.205277303843721	-0.00513420474437869	0.999805500558022	FALSE
1625	PF3D7_1115200.2o7_7060	0.0172865093910429	-0.145422532380599	-0.162709041771642	0.475027700623765	0.255354288463414	0.455392499196438	-0.0952816656006388	0.999805500558022	FALSE
1626	PF3D7_1115300.e1s1_7187	-0.0325291935876682	0.28710115339055	0.319630346978218	0.481632472869005	0.396532873286988	0.914329818566417	0.110443322733432	0.999805500558022	FALSE
1627	PF3D7_1115400.e1s1_6025	0.057202301065116	0.243535752995549	0.186333451930433	0.776016343166564	0.362421997456214	1.3635118434182	0.0546156568945571	0.999805500558022	FALSE
1628	PF3D7_1115600.e3s1_6879	-0.0387401677722856	0.0741144695443172	0.112854637316603	0.322353239012435	0.492413912723405	0.158051124048767	0.0402564580157304	0.999805500558022	FALSE
1629	PF3D7_1115700.e1s1_7476	-0.0515416503184028	0.130305617674833	0.181847267993236	0.277873512202168	0.317929488017591	0.313025537998976	0.0954914644358984	0.999805500558022	FALSE
1630	PF3D7_1116000.iso1.exon2.amp1_3093	-0.0599558371842193	0.113755310330108	0.173711147514327	0.877919589081062	0.303364436323275	2.37088450850351	0.034447698099565	0.999805500558022	FALSE
1631	PF3D7_1116000.iso1.exon2.amp2_3382	-0.0748082563976022	0.193351072587711	0.268159328985313	0.813390693761418	0.258832249399875	2.37697343979071	0.053908780592819	0.999805500558022	FALSE
1632	PF3D7_1116800.e4s1_7224	-0.117699662384842	0.118167491929928	0.235867154314769	0.35281528151974	0.405991762744624	0.4888092335364	0.0944960880872156	0.999805500558022	FALSE
1633	PF3D7_1117000.iso1.exon6.amp1_3500	-0.0114909920324332	0.0791538583738042	0.0906448504062373	0.752290882422066	0.275570320639354	0.592427622769217	0.0462936097944892	0.999805500558022	FALSE
1634	PF3D7_1117200.iso1.exon2.amp1_1104	0.0186513843037457	-0.0664413814596273	-0.085092765763373	0.460058921544757	0.223639999801912	0.22255380507661	-0.0634491534240637	0.999805500558022	FALSE
1635	PF3D7_1117800.iso1.exon1.amp1_264	-0.0167659744112193	0.0423727565897977	0.059138731001017	0.516492264171204	0.206876326868501	0.173882155795702	0.0484406954332826	0.999805500558022	FALSE
1636	PF3D7_1117900.iso1.exon1.amp1_2246	0.0363278489920417	0.061435742168953	0.0251078931769113	0.861484070989615	0.455531824921644	0.256887809154483	0.0095554614857744	0.999805500558022	FALSE
1637	PF3D7_1118100.iso1.exon1.amp1_3510	-0.0818501878846398	0.0817264524385568	0.163576640323197	0.0868895999467257	0.233951142961449	0.159388478326193	0.120163978863363	0.999805500558022	FALSE
1638	PF3D7_1118100.iso1.exon2.amp1_2116	-0.0609056548159893	-0.0698966845518843	-0.00899102973589502	0.906076028038254	0.263345253370477	0.130716831441207	-0.00594459365111693	0.999805500558022	FALSE
1639	PF3D7_1118200.e1s1_7968	-0.104029271204436	0.16435019293558	0.268379464140016	0.0461484648702242	0.481653022641604	0.197740397880649	0.0974793393562222	0.999805500558022	FALSE
1640	PF3D7_1118300.e1s1_7205	-0.0574474943384262	0.419818685683206	0.477266180021632	0.300233345757647	0.374936143885365	0.892492483574719	0.17216660977285	0.999805500558022	FALSE
1641	PF3D7_1118800.2o7_5861	-0.0577611631615963	0.0621048363671321	0.119865999528728	0.305902187225683	0.290918365407532	0.213034177882351	0.0705117770339566	0.999805500558022	FALSE
1642	PF3D7_1119400.iso1.exon1.amp3_2783	-0.0225265957437935	-0.0862198551337943	-0.0636932593900009	0.652977157106769	0.431572685721343	0.254644733519895	-0.0255396245173535	0.999805500558022	FALSE
1643	PF3D7_1119500.iso1.exon1.amp1_3300	-0.0156616639184156	0.0625807801338294	0.078242444052245	0.472801891329219	0.145928482704158	0.21640859677514	0.08394384214391	0.999805500558022	FALSE
1644	PF3D7_1119500.iso1.exon3.amp1_3827	-0.115804060009874	-0.0227752319473293	0.0930288280625448	0.342361345821235	0.366761688995088	0.155067914604256	0.0443465456809389	0.999805500558022	FALSE
1645	PF3D7_1119700.iso1.exon1.amp1_1569	-0.149099928430433	0.0878772916298011	0.236977220060234	0.0769967613260225	0.454067152924547	0.206951596199632	0.0910846116474523	0.999805500558022	FALSE
1646	PF3D7_1119900.iso1.exon1.amp1_3728	-0.120670422617928	0.131487310560672	0.2521577331786	0.0668789419584426	0.392448839315704	0.220772881007352	0.111401200579818	0.999805500558022	FALSE
1647	PF3D7_1120300.2o2_8189	-0.0881964267363184	0.190824678183613	0.279021104919932	0.458354067934819	0.237315061268959	0.757702613678951	0.137821510891208	0.999805500558022	FALSE
1648	PF3D7_1120400.iso1.exon2.amp1_1793	-0.108372921859027	0.0635733826768298	0.171946304535857	0.250018539887818	0.340740414166898	0.27179252540648	0.0858571767802606	0.999805500558022	FALSE
1649	PF3D7_1120700.iso1.exon1.amp2_3653	-0.0751715761893385	-0.0514999294241878	0.0236716467651506	0.945778392062733	0.288091679784217	0.724799288017103	0.0108530351100584	0.999805500558022	FALSE
1650	PF3D7_1120800.iso1.exon1.amp1_4126	-0.0620341143418019	0.0248115718389158	0.0868456861807177	0.191599349814805	0.224080453195077	0.108206400459773	0.0675352297575431	0.999805500558022	FALSE
1651	PF3D7_1121200.iso1.exon1.amp1_653	-0.0796604032841511	-0.0657156227462035	0.0139447805379476	0.93115090648831	0.29871656238506	0.323309344275034	0.00770732650635662	0.999805500558022	FALSE
1652	PF3D7_1121600.iso1.exon2.amp1_2679	-0.0397273238676723	0.401026519781537	0.440753843649209	0.49784075705466	0.313938627753675	1.31998384026639	0.138527417566348	0.999805500558022	FALSE
1653	PF3D7_1121700.e1s1_5657	-0.0225083055636003	0.264716922997083	0.287225228560683	0.206063681711741	0.198527430973049	0.42404310438917	0.20409782197561	0.999805500558022	FALSE
1654	PF3D7_1121800.s1_7974	0.0100059152334747	0.151258447653221	0.141252532419747	0.681787100762651	0.338649835794183	0.706990243030606	0.0593245706369857	0.999805500558022	FALSE
1655	PF3D7_1122000.iso1.exon1.amp1_4471	-0.0761755769305351	0.00477780393725595	0.0809533808677911	0.724215190618966	0.28334402558524	0.468744001519975	0.0435966852304754	0.999805500558022	FALSE
1656	PF3D7_1122500.iso1.exon1.amp1_3721	-0.0471616254684895	0.123406700494889	0.170568325963378	0.0325118570760041	0.301934089607455	0.111903755248562	0.0990180654486614	0.999805500558022	FALSE
1657	PF3D7_1122500.iso1.exon1.amp2_4229	-0.0563542294804206	-0.0741072206819048	-0.0177529912014842	0.937963447072043	0.280673752015524	0.46963724774751	-0.00962349009601744	0.999805500558022	FALSE
1658	PF3D7_1122600.2o2_5848	-0.109148457946554	-0.0331784268711932	0.0759700310753604	0.818722017189149	0.401348213523148	0.680884178580616	0.0286955612597724	0.999805500558022	FALSE
1659	PF3D7_1122800.e1s1_6545	-0.0207092562364123	0.0641335277680998	0.0848427840045121	0.777782386324153	0.202232378352161	0.624788435307515	0.0500795740198368	0.999805500558022	FALSE
1660	PF3D7_1122900.e1s1_9126	-0.0630396375140886	0.029644917353146	0.0926845548672346	0.901892676304157	0.501335908122108	1.56956072849953	0.0219087998512772	0.999805500558022	FALSE
1661	PF3D7_1122900.e2s2_7971	-0.090773219652786	0.0408697894524696	0.131643009105256	0.658838352154922	0.498982109394938	0.595979083668193	0.0429641335427438	0.999805500558022	FALSE
1662	PF3D7_1122900.e2s3_6815	-0.0602709481836176	-0.0136386856034513	0.0466322625801663	0.837214048260491	0.425655005399583	0.4530965303161	0.0181254910381345	0.999805500558022	FALSE
1663	PF3D7_1122900.e2s5_7132	-0.0176626685591769	0.150979120327301	0.168641788886478	0.169095384149175	0.331664402253611	0.211208527539256	0.0876907409598656	0.999805500558022	FALSE
1664	PF3D7_1123000.iso1.exon1.amp3_1921	0.00252600088007168	-0.00772786456348911	-0.0102538654435608	0.936284112946811	0.215890823821419	0.259201552972329	-0.00772864808680234	0.999805500558022	FALSE
1665	PF3D7_1123200.iso1.exon1.amp1_3335	0.057944545012289	0.0460444964246456	-0.0119000485876434	0.935524089509224	0.276862536775994	0.29416155413728	-0.00711288954325164	0.999805500558022	FALSE
1666	PF3D7_1123400.e1_5091	-0.103260738362016	-0.120764442863888	-0.0175037045018726	0.925734917100738	0.500314573247965	0.354463529206262	-0.00599925964641121	0.999805500558022	FALSE
1667	PF3D7_1123500.iso1.exon1.amp1_4580	-0.188054096357728	0.0520814843214136	0.240135580679141	0.42620760533261	0.679062571328708	0.569930887829169	0.0599303872170231	0.999805500558022	FALSE
1668	PF3D7_1124000.1o5_7896	-0.0521747290861654	-0.0431583386969198	0.00901639038924558	0.978799310650048	0.370652791383095	0.701885695763666	0.00357330872378884	0.999805500558022	FALSE
1669	PF3D7_1124000.2o5_7607	-0.0630722241799408	0.105215349392563	0.168287573572504	0.249458324417681	0.314684886435583	0.267466939909327	0.0905373387387565	0.999805500558022	FALSE
1670	PF3D7_1124100.iso1.exon1.amp1_1988	0.00909582396084232	0.068071975240132	0.0589761512792897	0.914623676883088	0.34127341907353	1.14955245466954	0.0196447035498727	0.999805500558022	FALSE
1671	PF3D7_1124300.1o3_7324	-0.116565819101797	0.0860819498498504	0.202647768951647	0.543819363141884	0.578881682379147	0.65848496657177	0.0574145853193843	0.999805500558022	FALSE
1672	PF3D7_1124400.iso1.exon1.amp1_1806	-0.0550080067386422	0.0434891043895973	0.0984971111282396	0.503012198353127	0.22789769813448	0.291011439955562	0.0696349863794591	0.999805500558022	FALSE
1673	PF3D7_1124500.1o1_7615	0.0258678274667173	-0.142634889798603	-0.168502717265321	0.467151538357327	0.255751665477765	0.462958480671278	-0.0980993000092919	0.999805500558022	FALSE
1674	PF3D7_1124600.e1s1_5168	-0.144389538199815	0.134209830513388	0.278599368713203	0.526079966768234	0.493073114841579	0.884765108035022	0.0843423341165316	0.999805500558022	FALSE
1675	PF3D7_1124700.e1s1_6312	-0.0236719489364289	0.0257105949890015	0.0493825439254303	0.761821809265273	0.202537880267776	0.333474249409872	0.037249838904321	0.999805500558022	FALSE
1676	PF3D7_1125300.iso1.exon1.amp1_2856	0.0201981831653414	0.0509769558484024	0.0307787726830609	0.959253338317009	0.290868627388989	1.26217268818713	0.0102144826437972	0.999805500558022	FALSE
1677	PF3D7_1125300.iso1.exon1.amp2_3352	0.0449959030484447	-0.0597611407182107	-0.104757043766655	0.898940381168084	0.254410567377692	1.72968197921473	-0.0279591892413545	0.999805500558022	FALSE
1678	PF3D7_1125400.2o2_5277	-0.0213299350217913	-0.00633534459715897	0.0149945904246323	0.871776475672291	0.240024239344742	0.17650052131163	0.0106881360141587	0.999805500558022	FALSE
1679	PF3D7_1125700.6o6_7634	-0.0387078263459902	0.0345782592771123	0.0732860856231025	0.872141165748333	0.351919300218832	0.947986996219741	0.0266577220592436	0.999805500558022	FALSE
1680	PF3D7_1125800.1o4_6747	-0.0822973538031357	-0.0864545493399604	-0.00415719553682464	0.981949721544336	0.422727969691615	0.357688488141495	-0.0016655278211081	0.999805500558022	FALSE
1681	PF3D7_1125800.3o4_6458	-0.0260927356174966	0.027044621481312	0.0531373570988086	0.821227426752751	0.269596351529734	0.484077779594997	0.0294158278173759	0.999805500558022	FALSE
1682	PF3D7_1126000.e1s2_8344	-0.0808863306418916	0.0298365401886521	0.110722870830544	0.398465976818046	0.283645189561136	0.247917872344324	0.0659298334344666	0.999805500558022	FALSE
1683	PF3D7_1126100.iso1.exon2.amp2_220	-0.0658580041536122	0.00392490538771248	0.0697829095413247	0.822300028911024	0.462541347893149	0.631745892528488	0.024016518699108	0.999805500558022	FALSE
1684	PF3D7_1126300.e2_7985	0.0254501398744493	0.0387913984006889	0.0133412585262397	0.932076602127271	0.245648467415861	0.317985994666104	0.00872996044220179	0.999805500558022	FALSE
1685	PF3D7_1126400.2o3_5535	-0.0860842752589673	0.0884980446811934	0.174582319940161	0.67895836724416	0.245299814690369	0.872438248212588	0.0783101013493582	0.999805500558022	FALSE
1686	PF3D7_1126500.iso1.exon1.amp1_2267	-0.0622240013742611	0.064065937458259	0.12628993883252	0.26626994139756	0.347266785724895	0.195113056807017	0.0630560326863856	0.999805500558022	FALSE
1687	PF3D7_1127000.e6s1_6000	0.0190616938138298	0.109346309710166	0.090284615896336	0.692775919933261	0.330890486230643	0.462333970351335	0.0432452182276244	0.999805500558022	FALSE
1688	PF3D7_1127300.1o1_7293	-0.0458873610608499	0.14487761008044	0.19076497114129	0.281799436817799	0.328963286814098	0.33200968220123	0.096549821111578	0.999805500558022	FALSE
1689	PF3D7_1127400.iso1.exon1.amp1_2346	-0.00972650553157536	0.0913800543373466	0.101106559868922	0.205828675469137	0.141392502539536	0.146413704138715	0.118703790481778	0.999805500558022	FALSE
1690	PF3D7_1127400.iso1.exon2.amp1_2078	-0.0235100072871518	0.0444942884605123	0.068004295747664	0.398647102293388	0.156617074147505	0.154183753286824	0.0724921814396345	0.999805500558022	FALSE
1691	PF3D7_1127600.iso1.exon2.amp1_349	-0.0239061374651624	-0.0565594468864084	-0.032653309421246	0.677081395989511	0.206915094397466	0.147146715340524	-0.0270551094567348	0.999805500558022	FALSE
1692	PF3D7_1127700.1o3_4715	0.0218281191949086	0.0429384728280709	0.0211103536331623	0.858618873014496	0.331380921789542	0.220608179274882	0.0109618732346433	0.999805500558022	FALSE
1693	PF3D7_1127900.3o3_6444	-0.101655691132826	0.11417114583239	0.215826836965216	0.766879071753756	0.379409069607201	1.51565051509724	0.0581086841555495	0.999805500558022	FALSE
1694	PF3D7_1128100.2o3_7845	0.0257597682394622	-0.0709873623153442	-0.0967471305548064	0.86465389385255	0.542890411891977	1.17639199871312	-0.0250075647878322	0.999805500558022	FALSE
1695	PF3D7_1128300.e1s1_8069	-0.0257522506456914	0.0861570063393579	0.111909256985049	0.47794344435716	0.211043447267512	0.313397419986301	0.0829952965159262	0.999805500558022	FALSE
1696	PF3D7_1128300.e3s1_8903	-0.0710100578889462	-0.0646057394344851	0.00640431845446107	0.974422038202284	0.193321542876814	0.414637074736454	0.00466631578787997	0.999805500558022	FALSE
1697	PF3D7_1128500.1o1_8799	-0.144370311652768	0.105340675602564	0.249710987255332	0.179116331194227	0.562978312312739	0.312735074725023	0.0769400651408743	0.999805500558022	FALSE
1698	PF3D7_1129000.e1s1_6583	-0.0672964976310461	-0.0436626135427936	0.0236338840882525	0.674033705053362	0.250809757503995	0.0762508132470254	0.0165623239495295	0.999805500558022	FALSE
1699	PF3D7_1129100.e1s1_6319	-0.111594771022722	-0.194599404334702	-0.0830046333119806	0.865102306482757	0.492242743092055	1.01133385341645	-0.0241177638691035	0.999805500558022	FALSE
1700	PF3D7_1129200.2o4_7594	-0.0677553452877846	0.000214460372655623	0.0679698056604402	0.632967233669018	0.385649010719226	0.264673222734616	0.0302779217625549	0.999805500558022	FALSE
1701	PF3D7_1129500.iso1.exon1.amp1_4492	-0.117805615667348	-0.0428836897877527	0.0749219258795955	0.705208478526874	0.566631289276297	0.364312859996529	0.0227925633352423	0.999805500558022	FALSE
1702	PF3D7_1129600.e1s1_8953	-0.0691572287263921	0.270782937164664	0.339940165891056	0.302785970282852	0.260551960983926	0.639775547059374	0.174164728136422	0.999805500558022	FALSE
1703	PF3D7_1129700.iso1.exon1.amp1_1271	-0.0507834648255506	0.00577973220293053	0.0565631970284811	0.592826598633329	0.159948478492729	0.211741182166295	0.0566195667212745	0.999805500558022	FALSE
1704	PF3D7_1129800.1o1_9026	0.0884372697769281	0.0671452000518627	-0.0212920697250654	0.881186562514607	0.612324109732181	0.204520605090988	-0.00610455922870153	0.999805500558022	FALSE
1705	PF3D7_1130200_5980	0.0329347151294323	0.246270936896234	0.213336221766801	0.787484514994812	0.290459853518591	1.6521664953452	0.057809900704152	0.999805500558022	FALSE
1706	PF3D7_1130400_8004	-0.0469301811334542	0.0693230981942371	0.116253279327691	0.626706968263314	0.349723675209275	0.480883271806248	0.0528489098337007	0.999805500558022	FALSE
1707	PF3D7_1131200.iso1.exon1.amp1_62	-0.0448461141138596	0.0955195651099647	0.140365679223824	0.193576550849726	0.216122645614149	0.195143575683629	0.109373610952311	0.999805500558022	FALSE
1708	PF3D7_1131200.iso1.exon6.amp1_345	-0.0661027186301702	0.0291028399583062	0.0952055585884765	0.113765445306238	0.141630725208131	0.102875142441587	0.115096305859935	0.999805500558022	FALSE
1709	PF3D7_1131600.s2_8288	-0.0327434429471003	0.0515584192047776	0.0843018621518778	0.612186511683624	0.289889184315335	0.33005730468339	0.0476891362707907	0.999805500558022	FALSE
1710	PF3D7_1131800.iso1.exon1.amp1_838	-0.0598536439724411	0.0245908996005163	0.0844445435729574	0.268735791689049	0.196447211807392	0.136896732747897	0.0737826074890773	0.999805500558022	FALSE
1711	PF3D7_1132300.1o1_5547	-0.0644272947327665	-0.0426921698325579	0.0217351249002087	0.959257309728283	0.527670682528788	0.875895951485207	0.00627995607837545	0.999805500558022	FALSE
1712	PF3D7_1132900.1o1_6392	-0.0205881211694914	0.164141417286987	0.184729538456478	0.665059796018115	0.201785261766422	0.882807307950612	0.0878634190757243	0.999805500558022	FALSE
1713	PF3D7_1133200.e1s2_5075	-0.0877694877763615	-0.0127924120859586	0.0749770756904029	0.733178743575928	0.463882699532969	0.431122752600389	0.0271444908558732	0.999805500558022	FALSE
1714	PF3D7_1133400_6235	0.40310286084189	0.9249268490091	0.521823988167211	0.345910554630111	0.521846680734941	1.08374170564528	0.142485799791813	0.999805500558022	FALSE
1715	PF3D7_1133500.iso1.exon1.amp1_1264	-0.0419175100888129	0.163216143766913	0.205133653855726	0.22442091552332	0.2527806183502	0.31418607074172	0.131334430419705	0.999805500558022	FALSE
1716	PF3D7_1133500.iso1.exon2.amp1_4149	-0.0209981873995102	0.0931907973800985	0.114188984779609	0.85075836168067	0.186189724006379	1.27096622944927	0.0415006304795105	0.999805500558022	FALSE
1717	PF3D7_1133700.iso1.exon1.amp1_970	-0.105782928950762	-0.216710151673163	-0.110927222722401	0.586099282336187	0.350251741540158	0.403869404897026	-0.0518437380456745	0.999805500558022	FALSE
1718	PF3D7_1133800.iso1.exon1.amp1_1320	0.000748969025262043	0.00786048885594859	0.00711151983068654	0.977708192329352	0.45566889234296	0.511673872404879	0.00256422405282458	0.999805500558022	FALSE
1719	PF3D7_1133900.iso1.exon2.amp2_3355	-0.0277642415581275	-0.0232999444567252	0.00446429710140233	0.987982401115822	0.37489154492342	0.609738314904499	0.00182489719012952	0.999805500558022	FALSE
1720	PF3D7_1134000.e1s1_6336	-0.0778794012862331	-0.0975768142953715	-0.0196974130091384	0.926009103439443	0.38147499015357	0.426039987533978	-0.0084899632237123	0.999805500558022	FALSE
1721	PF3D7_1134200.s1_7422	-0.0422985569582278	-0.0138562658629265	0.0284422910953013	0.947802085933368	0.370488306579549	0.904197588112494	0.0102748310644541	0.999805500558022	FALSE
1722	PF3D7_1134300.iso1.exon1.amp1_4294	-0.0396140596919024	0.0540692356286307	0.0936832953205331	0.553608991098863	0.233588118254146	0.31575207724836	0.0639684852163017	0.999805500558022	FALSE
1723	PF3D7_1134300.iso1.exon1.amp2_4583	-0.0720066409055736	0.0245466191944249	0.0965532600999986	0.0917755483433823	0.299369366861592	0.0441768847867578	0.0569369666337202	0.999805500558022	FALSE
1724	PF3D7_1134300.iso1.exon1.amp3_4228	-0.0390801094155768	0.133837363311585	0.172917472727162	0.318130916082096	0.259380315607744	0.331978723683193	0.107368192063945	0.999805500558022	FALSE
1725	PF3D7_1134500.s1_5988	-0.0066598511898743	0.127649523633087	0.134309374822962	0.6329854112733	0.187237052818362	0.578720525542506	0.0856061449555669	0.999805500558022	FALSE
1726	PF3D7_1134500.s2_6572	-0.0672268149429087	0.0458564128682131	0.113083227811122	0.47480473187491	0.30582704596126	0.306473772421685	0.0616125138091562	0.999805500558022	FALSE
1727	PF3D7_1134700.e1_5101	-0.0239265437730093	0.0655246093024918	0.0894511530755011	0.680796012636536	0.347453200838063	0.436819089898299	0.041587634290526	0.999805500558022	FALSE
1728	PF3D7_1134700.e2s1_6257	-0.0421486323734543	0.101584086820791	0.143732719194245	0.644969267584509	0.303662484371997	0.638470043217646	0.0671521766689491	0.999805500558022	FALSE
1729	PF3D7_1134700.e2s2_6835	-0.0350106562116129	0.142969826331751	0.177980482543364	0.667242460439207	0.420846826988769	0.847891150427303	0.0608920345340868	0.999805500558022	FALSE
1730	PF3D7_1135100.1o1_6774	-0.0479811792557683	0.118617179567232	0.166598358823	0.564688575721491	0.267232324822307	0.588103943234636	0.08697922333279	0.999805500558022	FALSE
1731	PF3D7_1135400.e1s1_5738	-0.118992021745246	0.0680266748928354	0.187018696638081	0.104539698110373	0.407386612346659	0.17759340848391	0.0802057163635738	0.999805500558022	FALSE
1732	PF3D7_1136100.1o1_5019	-0.016907063949176	0.227999069985423	0.244906133934599	0.352221535420387	0.368571094744997	0.510291245836602	0.105502070962551	0.999805500558022	FALSE
1733	PF3D7_1136200.1o5_8797	-0.16251621906611	-0.0230664094170116	0.139449809649099	0.488878900505428	0.470228523489812	0.38146661792649	0.0503926896037497	0.999805500558022	FALSE
1734	PF3D7_1136200.5o5_9080	-0.107663435963688	-0.00294683349275964	0.104716602470928	0.286939873549626	0.392737542942049	0.147067187962058	0.0467266787219372	0.999805500558022	FALSE
1735	PF3D7_1136300.e2s1_5389	0.035418151873107	-0.0750882675703057	-0.110506419443413	0.519952674222237	0.27769640574946	0.339634905991351	-0.0645684913892293	0.999805500558022	FALSE
1736	PF3D7_1136500.1.e4s1_8282	-0.0522138852280254	-0.0534424352248752	-0.00122854999684983	0.988970533919673	0.322433300776466	0.148314130763833	-0.000664828224562036	0.999805500558022	FALSE
1737	PF3D7_1136600.iso1.exon1.amp1_4586	-0.0467683950866125	0.0168979481213704	0.0636663432079828	0.839928269786637	0.235867377816973	0.655860947215113	0.0340267962193322	0.999805500558022	FALSE
1738	PF3D7_1136700.iso1.exon7.amp1_117	-0.0548061825041694	0.0712577178513165	0.126063900355486	0.239792720736261	0.153618304970969	0.20105392752523	0.131656614734063	0.999805500558022	FALSE
1739	PF3D7_1136900.e1s1_7134	-0.147133602607877	0.0294406674795127	0.17657427008739	0.187653256284832	0.594969454014523	0.175041044507943	0.0521820325480651	0.999805500558022	FALSE
1740	PF3D7_1136900.e2s1_4885	0.060480070707332	0.0485252909055568	-0.0119547798017752	0.947634404986698	0.20626332199986	0.375992567634061	-0.00861214131788227	0.999805500558022	FALSE
1741	PF3D7_1137100_7714	-0.0426267020628289	0.064163007957616	0.106789710020445	0.849614929594089	0.237733361317683	1.17813837684436	0.0393616344557011	0.999805500558022	FALSE
1742	PF3D7_1137300.1o1_6196	-0.0572306736772876	-0.0678517534176777	-0.0106210797403901	0.912929572418178	0.384491265887264	0.151953444720322	-0.00483624814917341	0.999805500558022	FALSE
1743	PF3D7_1137600 (renamed)_7629	-0.0988729509553004	-0.0796582811454989	0.0192146698098014	0.964971263387654	0.558445804755849	0.899643884668195	0.00528525922930571	0.999805500558022	FALSE
1744	PF3D7_1137600.1o2_7251	-0.0243905231732208	-0.118157355535883	-0.0937668323626619	0.0823525159078411	0.135198919038308	0.0894738115835181	-0.119378746262909	0.999805500558022	FALSE
1745	PF3D7_1137900.1o2_5315	-0.0240477217696409	0.110153311943617	0.134201033713258	0.214611000801124	0.246566242173872	0.194453630234259	0.0926806689737335	0.999805500558022	FALSE
1746	PF3D7_1137900.2o2_4737	-0.0406856833860762	0.0799195041889824	0.120605187575059	0.717387953806379	0.217471892505876	0.690302696352743	0.0652207747225609	0.999805500558022	FALSE
1747	PF3D7_1138000.iso1.exon1.amp3_4227	-0.0291062968570133	0.0186609527227816	0.0477672495797949	0.63754772824913	0.492354523368639	0.116544515920976	0.0170907745444076	0.999805500558022	FALSE
1748	PF3D7_1138100.1o1_8413	-0.0950054476976008	-0.00484223091469751	0.0901632167829032	0.702039398834804	0.286333992601809	0.481127307732708	0.0478568826462575	0.999805500558022	FALSE
1749	PF3D7_1138400.e1s2_7418	-0.043089389439416	-0.080954106847032	-0.0378647174076161	0.873978901965224	0.38667002747926	0.483343102816864	-0.0158335272327274	0.999805500558022	FALSE
1750	PF3D7_1138400.e1s3_5106	0.0126732996843136	0.0537819945667625	0.0411086948824489	0.925164855611493	0.402920168681343	0.909121007833049	0.0140993091202544	0.999805500558022	FALSE
1751	PF3D7_1138400.e1s4_8575	0.0837231701910078	0.0392804380175676	-0.0444427321734402	0.885899357063555	0.479465200057961	0.62926886614821	-0.0148636259939334	0.999805500558022	FALSE
1752	PF3D7_1138400.e1s5_8576	-0.129097645407896	0.0878315301376748	0.216929175545571	0.535567491053663	0.453147047504513	0.702187148358404	0.0742176492528122	0.999805500558022	FALSE
1753	PF3D7_1138800.3o7_5545	-0.0729419533177862	0.0547690487214474	0.127711002039234	0.72356352488284	0.283448729866635	0.746502498401506	0.058291552697272	0.999805500558022	FALSE
1754	PF3D7_1139100.iso1.exon1.amp2_3640	-0.091211809911699	0.0251809763594817	0.116392786271181	0.459015756131828	0.378700512494717	0.294924531607525	0.0523825839412279	0.999805500558022	FALSE
1755	PF3D7_1139200.iso1.exon2.amp1_3587	-0.0664355766338008	0.16894189146225	0.23537746809605	0.16847265520464	0.23227628093938	0.31071556872031	0.1619388980744	0.999805500558022	FALSE
1756	PF3D7_1139300.e2s1_8655	-0.0835825175433176	0.11610637882351	0.199688896366827	0.0944934559392045	0.484847700964493	0.167405532864015	0.0722705856363341	0.999805500558022	FALSE
1757	PF3D7_1139300.e2s3_8649	-0.155533568931064	0.134210197036913	0.289743765967978	0.443310839232997	0.615892713829425	0.739169979515959	0.0765568739946724	0.999805500558022	FALSE
1758	PF3D7_1139500.1.e1s1_5751	0.00133785448116447	-0.0287907102120634	-0.0301285646932279	0.913671340443975	0.263094613471359	0.576816817127737	-0.0159998883958426	0.999805500558022	FALSE
1759	PF3D7_1140000.2o2_8125	-0.170254299176323	0.0122179494250304	0.182472248601353	0.618223502241076	0.514729027958882	0.737692931660231	0.0559009762708555	0.999805500558022	FALSE
1760	PF3D7_1140100 (renamed)_5564	-0.14980850341098	0.108059838645195	0.257868342056175	0.754087264142762	0.663723207973814	1.70426221273267	0.050851665358913	0.999805500558022	FALSE
1761	PF3D7_1140500.e1s1_7204	0.0184817777582847	0.0203698399320341	0.00188806217374942	0.994424215272169	0.216740363753554	0.563088100750379	0.00113411607210665	0.999805500558022	FALSE
1762	PF3D7_1140900.3o6_8819	-0.0893232887672952	0.130463397590831	0.219786686358126	0.241488047057526	0.321638364925545	0.349046631234135	0.112781231792243	0.999805500558022	FALSE
1763	PF3D7_1140900.5o6_9108	-0.0481887628302178	0.0511156788450997	0.0993044416753175	0.705375590325951	0.256957537509755	0.540003018473173	0.0548377019439065	0.999805500558022	FALSE
1764	PF3D7_1141200.iso1.exon1.amp1_2920	-0.0342157413837004	-0.0117231962626917	0.0224925451210087	0.638577647457053	0.182595973369143	0.0766329165588008	0.0215398836507553	0.999805500558022	FALSE
1765	PF3D7_1141400.5o5_5552	-0.0293192699252361	0.0323763100731661	0.0616955799984021	0.472586089601338	0.259422082532282	0.152733233667089	0.0411587144909649	0.999805500558022	FALSE
1766	PF3D7_1141900.1o1_6461	-0.052069400848078	-0.0707794600728029	-0.0187100592247249	0.615110800086442	0.142496166608928	0.0592916937961546	-0.0229640078349057	0.999805500558022	FALSE
1767	PF3D7_1142800_7136	-0.0734136651671653	0.0550964124176893	0.128510077584855	0.75184695212442	0.254589124666133	0.844103846556817	0.0579124266926581	0.999805500558022	FALSE
1768	PF3D7_1142900.e2_6836	-0.0422993735505658	0.308555994062553	0.350855367613119	0.200877751488532	0.213703062961644	0.511246357986172	0.221594857827267	0.999805500558022	FALSE
1769	PF3D7_1143000.iso1.exon1.amp1_3893	-0.0318105857719328	0.288202404992638	0.32001299076457	0.0614908454056671	0.180685017504074	0.280497867165984	0.274467142441093	0.999805500558022	FALSE
1770	PF3D7_1143100.iso1.exon1.amp2_1039	0.00796252591311879	-0.0624060008009103	-0.0703685267140291	0.789471875943602	0.213341556175821	0.546590154520768	-0.0432147236995217	0.999805500558022	FALSE
1771	PF3D7_1143300.1o1_4684	-0.0163077589509498	-0.232255918112631	-0.215948159161681	0.45787998820602	0.228832823050431	0.584308347106941	-0.123827725460744	0.999805500558022	FALSE
1772	PF3D7_1143900.iso1.exon2.amp1_1547	-0.106928523610673	0.00273929392226471	0.109667817532937	0.509545055263923	0.338372087576111	0.321630359495959	0.0543093309297059	0.999805500558022	FALSE
1773	PF3D7_1144200.iso1.exon2.amp1_2141	-0.0228932928123287	0.171497742571817	0.194391035384145	0.324140779938103	0.220085180211514	0.382405766212513	0.133040472092868	0.999805500558022	FALSE
1774	PF3D7_1144500.1o1_6422	-0.0661586425414642	0.0883412862814261	0.15449992882289	0.243711164710378	0.185283168252901	0.249039825709846	0.133138221573732	0.999805500558022	FALSE
1775	PF3D7_1144600.iso1.exon1.amp1_3019	-0.0322982493046471	0.0299041663925774	0.0622024156972245	0.591191235279962	0.1669722801108	0.232429839674694	0.0590866150709487	0.999805500558022	FALSE
1776	PF3D7_1145200.iso1.exon1.amp1_1399	-0.024295565886871	0.0998097791032947	0.124105344990166	0.207591797927057	0.299957285864729	0.166889384378314	0.0717649154467631	0.999805500558022	FALSE
1777	PF3D7_1145200.iso1.exon1.amp3_2211	0.00321966829625025	0.0541420406954028	0.0509223723991526	0.691149620675946	0.145783241756147	0.262096295260385	0.0521119610794801	0.999805500558022	FALSE
1778	PF3D7_1145400.e1s1_8368	-0.0396776112872169	0.0427154094508012	0.0823930207380181	0.767151795996771	0.287703475374147	0.573319144493823	0.0413856370243279	0.999805500558022	FALSE
1779	PF3D7_1145500.2o2_8228	-0.0434776605065949	-0.122515483446295	-0.0790378229397003	0.357187452643404	0.116265689764457	0.166810951874049	-0.107173469917084	0.999805500558022	FALSE
1780	PF3D7_1145900.iso1.exon2.amp1_376	-0.0735712923471058	-0.114612296127028	-0.0410410037799221	0.911443051931562	0.105521590036247	0.774132554984811	-0.0247331979135387	0.999805500558022	FALSE
1781	PF3D7_1146000.1o1_8205	-0.0870082497478035	-0.0715812925494877	0.0154269571983158	0.976406582089235	0.371913921984085	1.08905946873837	0.00509430759408397	0.999805500558022	FALSE
1782	PF3D7_1146500.1o1_8151	-0.109454093328067	-0.108941523458715	0.000512569869351831	0.995080715511942	0.405768153230963	0.0949764467907838	0.000222545129721914	0.999805500558022	FALSE
1783	PF3D7_1146700.iso1.exon1.amp1_3331	7.96824435023629e-05	0.123765591821955	0.123685909378453	0.680838727587041	0.210149233993903	0.620862584158591	0.0719507012762606	0.999805500558022	FALSE
1784	PF3D7_1146800.e3s1_4831	-0.0778589122666638	-0.0267051617385309	0.0511537505281328	0.812814689445981	0.600599816999526	0.402310666264372	0.014651005611754	0.999805500558022	FALSE
1785	PF3D7_1147200.iso1.exon1.amp3_4233	-0.0316870478183612	0.0056424415553721	0.0373294893737333	0.838534581959364	0.284536286430365	0.371646731283907	0.021055409789366	0.999805500558022	FALSE
1786	PF3D7_1147800.1.e2s1_5119	-0.0469136141302703	0.0241490191694709	0.0710626332997412	0.596014236142767	0.229339110445967	0.266085102851935	0.0506777613391747	0.999805500558022	FALSE
1787	PF3D7_1147800.iso2.exon1.amp1_325	-0.0955414332400769	0.110730411470672	0.206271844710749	0.322266257835086	0.326377096056936	0.398910320280851	0.10255781727357	0.999805500558022	FALSE
1788	PF3D7_1148900.iso1.exon1.amp1_1825	-0.0675304281328507	-0.0320477493272975	0.0354826788055533	0.957012862153375	0.184658152252152	1.38191920711644	0.0120090954557087	0.999805500558022	FALSE
1789	PF3D7_1149000.e1s1_5748	-0.100638213530638	-0.0168670434751796	0.083771170055458	0.679547593014622	0.332632336797646	0.406582981120054	0.0408671188875867	0.999805500558022	FALSE
1790	PF3D7_1149000.s4 (renamed)_8579	-0.0177779641699098	-0.143437834554692	-0.125659870384782	0.690203855924508	0.668203114437517	0.616116655766933	-0.0316069186976857	0.999805500558022	FALSE
1791	PF3D7_1149000.s6 (renamed)_7423	0.0297633407943046	0.0252671551121011	-0.00449618568220349	0.995036571886072	0.487667627748517	1.51013156142011	-0.00109917654468678	0.999805500558022	FALSE
1792	PF3D7_1149100.iso2.exon1.amp1_4097	-0.0267070903170779	-0.0154988146533452	0.0112082756637327	0.935564108263861	0.232192991369029	0.28026584156709	0.00784845819318103	0.999805500558022	FALSE
1793	PF3D7_1149100.iso2.exon2.amp1_3610	-0.0307432629162258	-0.00919671268812046	0.0215465502281054	0.814197150065268	0.190314364571794	0.180713999064316	0.018973209360594	0.999805500558022	FALSE
1794	PF3D7_1149200.e2s1_6829	0.0053934135762365	-0.0765330773422381	-0.0819264909184746	0.612294821769272	0.389703841042723	0.307874195696378	-0.0357933169812966	0.999805500558022	FALSE
1795	PF3D7_1149200.e2s2_6546	-0.0554439992441496	-0.0641019201550414	-0.00865792091089178	0.990753515444994	0.202543693222904	1.56875273265475	-0.0025920632990848	0.999805500558022	FALSE
1796	PF3D7_1149500.3o4_7655	-0.0988012090330851	0.0479119973674582	0.146713206400543	0.603025323114139	0.294633520124644	0.57414465712923	0.0724878458042827	0.999805500558022	FALSE
1797	PF3D7_1149500.e2_6825	-0.0138232199493097	-0.0482069013039727	-0.034383681354663	0.900129298751006	0.150265140738289	0.572993476695765	-0.024098012429571	0.999805500558022	FALSE
1798	PF3D7_1149900.iso1.exon2.amp1_4166	-0.159872290716741	0.0291959602735179	0.189068250990259	0.745760349555234	0.662243446978817	1.19656582988646	0.0425316187796942	0.999805500558022	FALSE
1799	PF3D7_1150000.iso1.exon2.amp1_3314	-0.124882896520832	0.0277245725665882	0.15260746908742	0.78405208683806	0.334359560161545	1.15904301610206	0.0510081874387168	0.999805500558022	FALSE
1800	PF3D7_1150200.iso1.exon1.amp1_412	-0.112810938020072	0.0544526922304478	0.16726363025052	0.223216833307856	0.303416473624823	0.248572830774787	0.0936038371802665	0.999805500558022	FALSE
1801	PF3D7_1150300.iso1.exon1.amp1_2740	-0.123771153833406	0.213336144630455	0.33710729846386	0.267081206194721	0.361561964508655	0.578261996849795	0.143471823368602	0.999805500558022	FALSE
1802	PF3D7_1150400.iso1.exon2.amp1_714	-0.0345303718192082	0.0735354395109084	0.108065811330117	0.748854203311781	0.306962370622215	0.697013681988285	0.0485301199027971	0.999805500558022	FALSE
1803	PF3D7_1200100.iso1.exon1.amp2_794	-0.112603733695205	0.123584677439393	0.236188411134598	0.0704362434448778	0.394171225598393	0.207699568723562	0.104133407524222	0.999805500558022	FALSE
1804	PF3D7_1200200.iso1.exon1.amp1_2148	-0.0949530061525727	0.0204205458496727	0.115373552002245	0.839101415685459	0.373041500681325	1.18429819621294	0.0363692708558187	0.999805500558022	FALSE
1805	PF3D7_1200300.e2s1_7189	-0.102482966532417	0.0428168247358105	0.145299791268228	0.721520297107102	0.27093301586889	0.84459371811597	0.0637040587681257	0.999805500558022	FALSE
1806	PF3D7_1200400.iso1.exon1.amp2_776	-0.0179670451697385	0.0971904200480886	0.115157465217827	0.827956063601738	0.186579542622745	1.10835788937086	0.0469042615281479	0.999805500558022	FALSE
1807	PF3D7_1200400.iso1.exon2.amp1_720	-0.191255545663842	0.0914371550454696	0.282692700709312	0.394357988902963	0.421962726463033	0.651611439153508	0.103947500851226	0.999805500558022	FALSE
1808	PF3D7_1200500.iso1.exon1.amp1_2436	-0.102883455538619	0.217444526351985	0.320327981890605	0.0255821097188905	0.288928310283596	0.219430392161384	0.189283406153814	0.999805500558022	FALSE
1809	PF3D7_1200600.iso1.exon2.amp3_2805	-0.156443414420483	0.231617836972412	0.388061251392896	0.206392772811161	0.561956721920756	0.561623225286266	0.115099858459231	0.999805500558022	FALSE
1810	PF3D7_1200800.iso1.exon2.amp1_4209	-0.0468748325892666	0.0643139220763299	0.111188754665596	0.778560381394034	0.211538788650149	0.823553874296658	0.0546138427978801	0.999805500558022	FALSE
1811	PF3D7_1201200.2o2_4660	-0.00699437095915615	0.0674730476504212	0.0744674186095774	0.940069180939152	0.44169370300603	2.07567684644927	0.0153690687275286	0.999805500558022	FALSE
1812	PF3D7_1201300.1o1_7539	-0.0466157853754472	0.169968539880966	0.216584325256414	0.258227016903056	0.319982342255832	0.358858573281872	0.111229060496911	0.999805500558022	FALSE
1813	PF3D7_1201300_8869	-0.019194801178454	0.175690438283005	0.194885239461459	0.0380046840716699	0.269394389156614	0.145296717350087	0.125620271671073	0.999805500558022	FALSE
1814	PF3D7_1201400.iso1.exon1.amp1_218	-0.0717556745544667	0.113165626948433	0.1849213015029	0.186965584798995	0.383782697310842	0.242329784104331	0.0831314971406576	0.999805500558022	FALSE
1815	PF3D7_1201400.iso1.exon1.amp2_2193	-0.0781614059630968	-0.0108319588561642	0.0673294471069326	0.849831256456786	0.388078812429556	0.733991112362083	0.0254949157595063	0.999805500558022	FALSE
1816	PF3D7_1202200_6847	-0.0234467333419431	0.0402977910328694	0.0637445243748125	0.873924465954781	0.393928579462139	0.832321486032429	0.0229172526264897	0.999805500558022	FALSE
1817	PF3D7_1202300.e14s1_9188	-0.0252790624357748	-0.0350499793898447	-0.00977091695406983	0.910844674297913	0.337718074489116	0.139077862166368	-0.0050611687385536	0.999805500558022	FALSE
1818	PF3D7_1202300.e31s1_7502	-0.138662553838382	0.258060570395669	0.396723124234051	0.196720009687889	0.528823594520274	0.56170869570059	0.124151857943368	0.999805500558022	FALSE
1819	PF3D7_1202300.e33s1_5173	0.00067403886101128	0.114819618570635	0.114145579709624	0.646920495255276	0.209002611578644	0.511720981189151	0.0729955763965754	0.999805500558022	FALSE
1820	PF3D7_1202300.e34s1_6594	-0.0350297642375652	0.0465649776346513	0.0815947418722165	0.324292438126614	0.154554237821977	0.1566595629215	0.0878555514957213	0.999805500558022	FALSE
1821	PF3D7_1202600.e1_8857	0.0276376665447757	0.0382081872046328	0.0105705206598571	0.917815137158273	0.234551786046358	0.199469271647083	0.0076293766733767	0.999805500558022	FALSE
1822	PF3D7_1203700.e3_8270	-0.0282043853267975	0.0674936444937234	0.0956980298205209	0.86482814308903	0.356768125825179	1.17307885125241	0.0309226201513867	0.999805500558022	FALSE
1823	PF3D7_1203900 (renamed)_7587	-0.0886547891191855	0.13685692848821	0.225511717607395	0.382482936973263	0.322501945363683	0.50606348633224	0.108091782934548	0.999805500558022	FALSE
1824	PF3D7_1204300_6840	-0.0315562523893087	0.0138867956378505	0.0454430480271591	0.910736551162564	0.185985916709493	0.848917895603623	0.022751260196088	0.999805500558022	FALSE
1825	PF3D7_1205100.iso1.exon1.amp1_152	-0.0823688229941446	-0.0185345703950102	0.0638342525991344	0.483328233270976	0.198595252665582	0.174063486885767	0.0542749647332609	0.999805500558022	FALSE
1826	PF3D7_1205400.iso1.exon1.amp2_488	-0.0986804964568557	0.0901997831339955	0.188880279590851	0.267517650377571	0.275755849948217	0.320598396867367	0.111992029793568	0.999805500558022	FALSE
1827	PF3D7_1205500.e1s1_6267	-0.101343747138519	-0.0342840060864656	0.0670597410520535	0.6911386677862	0.320558642027109	0.334243740599507	0.034698381312635	0.999805500558022	FALSE
1828	PF3D7_1205500.e1s2_5111	-0.217886295050417	-0.114016222662917	0.1038700723875	0.58337568272389	0.647569032374722	0.322941147239953	0.0279242572120291	0.999805500558022	FALSE
1829	PF3D7_1205800.3o4_5646	-0.00145203893916066	-0.0402607950400931	-0.0388087561009324	0.729052345926507	0.334131066560559	0.203635407457137	-0.0200716528165829	0.999805500558022	FALSE
1830	PF3D7_1206000.1o1_7583	-0.0811039625645705	0.152050698635922	0.233154661200492	0.182642136192668	0.314806101262528	0.316992503133786	0.1233427609243	0.999805500558022	FALSE
1831	PF3D7_1206100.e2s1_6587	-0.0222946432282699	0.18152623284576	0.20382087607403	0.798922560908459	0.0990781356991966	1.67385999655861	0.0600477664680313	0.999805500558022	FALSE
1832	PF3D7_1206600.iso1.exon1.amp1_261	-0.0143034362385375	0.107327252184651	0.121630688423189	0.482122096821599	0.230670227361681	0.344145294807719	0.0824463447427263	0.999805500558022	FALSE
1833	PF3D7_1206900 (renamed, has duplicates)_7621	-0.0508848167291778	0.0284385350020031	0.079323351731181	0.639989473173598	0.223131911376901	0.343461668280667	0.0551992473519099	0.999805500558022	FALSE
1834	PF3D7_1206900.4o4_7049	0.101036611515736	0.168170525550301	0.0671339140345648	0.915443286902057	0.333062845082064	1.32317685450588	0.0206659086120095	0.999805500558022	FALSE
1835	PF3D7_1207000.e3s1_7223	-0.00343583727060324	0.0276289520179009	0.0310647892885042	0.879615615090998	0.446420066794203	0.40232910975132	0.0117206570672844	0.999805500558022	FALSE
1836	PF3D7_1207200.iso1.exon1.amp3_2782	0.020507998704654	0.0778739078076622	0.0573659091030083	0.706522288644796	0.196382784257795	0.310344827554533	0.0450796257321294	0.999805500558022	FALSE
1837	PF3D7_1207400.2o2_8755	-0.0387220205538273	0.0839889404083813	0.122710960962209	0.885439475246522	0.211323525805949	1.78617981469956	0.032574664749509	0.999805500558022	FALSE
1838	PF3D7_1207500.e3s1_6870	-0.0580065660766916	-0.0118057974411236	0.046200768635568	0.464839878618834	0.252204037259116	0.0964797494105706	0.0320911926683486	0.999805500558022	FALSE
1839	PF3D7_1207600.1o1_4730	0.0517483891033901	-0.0862622920884075	-0.138010681191798	0.593352529318657	0.26114578082029	0.525953064120144	-0.0761014660086948	0.999805500558022	FALSE
1840	PF3D7_1208000.iso1.exon1.amp1_342	-0.0842971476340492	-0.0491329778181459	0.0351641698159033	0.95905904754869	0.201538381577091	1.43790550685498	0.0113669285229492	0.999805500558022	FALSE
1841	PF3D7_1208100 (renamed, has duplicates)_7883	-0.0214286579485172	0.106586078935715	0.128014736884232	0.0583611879679513	0.212245680466038	0.105372930749208	0.105016327365736	0.999805500558022	FALSE
1842	PF3D7_1208100.e2s1_5771	-0.016819724281308	0.117886358345991	0.134706082627299	0.058974776513093	0.239097794758447	0.109003655178344	0.0983257292424343	0.999805500558022	FALSE
1843	PF3D7_1208100.e2s2_5482	0.047080211244265	0.0265856269799929	-0.0204945842642721	0.900145075067377	0.486119303593932	0.298478247373465	-0.00728319656296406	0.999805500558022	FALSE
1844	PF3D7_1208500.iso1.exon1.amp2_seg1_1423	-0.030877255997818	0.157755982097055	0.188633238094873	0.00260821043781079	0.240067773323221	0.0779690568992204	0.137995507193021	0.999805500558022	FALSE
1845	PF3D7_1208800.e1s1_6623	-0.151650367715002	-0.0186774112749266	0.132972956440075	0.763151374713679	0.559164312233998	0.902468917043553	0.0365124741902755	0.999805500558022	FALSE
1846	PF3D7_1208900.s1_5377	-0.0278574541224286	-0.0357875161868456	-0.00793006206441704	0.990492976031838	0.349626230506943	1.3937961180232	-0.00232013022804961	0.999805500558022	FALSE
1847	PF3D7_1209400.e1s1_8090	-0.0366479200718487	0.0516287848789695	0.0882767049508182	0.904779066724371	0.323005014507613	1.54566422283697	0.0245830858083781	0.999805500558022	FALSE
1848	PF3D7_1209500.1.3o3_5905	-0.0418806021899548	0.091133069832107	0.133013672022062	0.438235395364981	0.240522527917074	0.338181895513679	0.0875411552148845	0.999805500558022	FALSE
1849	PF3D7_1209500.iso2.exon2.amp1_3320	0.0235516676763305	0.0668558004644375	0.0433041327881069	0.636819993703265	0.355227032264961	0.14501447540689	0.0213290403609633	0.999805500558022	FALSE
1850	PF3D7_1209900.1o1_8507	-0.0668935384883192	0.045721794898207	0.112615333386526	0.314401049623191	0.380748207042327	0.186143207726076	0.0515219286500885	0.999805500558022	FALSE
1851	PF3D7_1210100.1o1_7277	-0.0557680947329477	0.131127119329594	0.186895214062542	0.589163616378811	0.435690151770793	0.698917487396256	0.065960576845425	0.999805500558022	FALSE
1852	PF3D7_1210600.iso1.exon1.amp1_4021	-0.146702408866109	-0.0571434916405654	0.0895589172255436	0.840948944168422	0.619231552617934	0.911644056487981	0.0226788084169442	0.999805500558022	FALSE
1853	PF3D7_1210600.iso1.exon1.amp2_4535	-0.109015094694247	-0.00390175864461462	0.105113336049632	0.749756884333039	0.534547915431743	0.664035300978476	0.0318269656254684	0.999805500558022	FALSE
1854	PF3D7_1211000.e3s1_5406	-0.102119160217235	0.0249113446026506	0.127030504819886	0.306940457575165	0.421482502533238	0.206830907855541	0.0524944715087754	0.999805500558022	FALSE
1855	PF3D7_1211000.e3s2_8300	0.0230903726421229	-0.1795946135454	-0.202684986187523	0.692385635887521	0.386917130702371	1.05759114841827	-0.0665900546468047	0.999805500558022	FALSE
1856	PF3D7_1211300.e2s1_4865	0.0186674662917816	0.0029361270743145	-0.0157313392174671	0.823795622657478	0.114669708207545	0.14280379748221	-0.0221955024984922	0.999805500558022	FALSE
1857	PF3D7_1211600.iso1.exon1.amp2_2832	-0.0445210561926027	0.0465612795603821	0.0910823357529848	0.582503425267972	0.31922722854763	0.324888031832445	0.0474593088289589	0.999805500558022	FALSE
1858	PF3D7_1211900.e1s1_5489	-0.0656929026753984	-0.0517663248199938	0.0139265778554047	0.896651449413457	0.372869874376945	0.183276137595614	0.00650506062320659	0.999805500558022	FALSE
1859	PF3D7_1211900.e2s1_8064	-0.0802174654964109	0.154490372690579	0.23470783818699	0.483884946990588	0.246032475288565	0.676842986987668	0.120888879117663	0.999805500558022	FALSE
1860	PF3D7_1212000 (renamed)_7876	-0.0579688436769053	-0.0386247005206339	0.0193441431562714	0.834315758240284	0.297498914627228	0.163916386585645	0.0112823979563701	0.999805500558022	FALSE
1861	PF3D7_1212000.e2s1_5966	-0.0217659682890245	-0.021592923510941	0.000173044778083525	0.998617039813226	0.223708084960456	0.195201334629334	0.000130665378801082	0.999805500558022	FALSE
1862	PF3D7_1212400.1o1_5266	-0.027790340785829	-0.0350935301208565	-0.0073031893350275	0.897190221043352	0.280638582145579	0.0614698678047835	-0.00458661020688624	0.999805500558022	FALSE
1863	PF3D7_1212500.1o1_4735	-0.0588565844826847	0.139136833526541	0.197993418009226	0.284307775871299	0.280557228050335	0.350938819496864	0.114094453861215	0.999805500558022	FALSE
1864	PF3D7_1212700.s1_9130	-0.0896277784586453	-0.0848721301921675	0.00475564826647781	0.98532916759354	0.366215668741608	0.529048838705762	0.00204438314077583	0.999805500558022	FALSE
1865	PF3D7_1212800_6558	-0.0522201148174421	0.0665396882510123	0.118759803068454	0.511161906540842	0.205150890621009	0.36309718351683	0.0867498250515715	0.999805500558022	FALSE
1866	PF3D7_1212900.e1s1_8355	-0.0403951086444591	0.187327611814007	0.227722720458466	0.547952972807043	0.603014301997614	0.752752272947185	0.0610743145206524	0.999805500558022	FALSE
1867	PF3D7_1213400.e1s1_8061	-0.0447294271991947	0.00537060015948008	0.0501000273586748	0.546759821676604	0.162365904827495	0.162216570767318	0.0514323350071806	0.999805500558022	FALSE
1868	PF3D7_1213500.1o2_5618	-0.0741032210642759	0.170573265186246	0.244676486250522	0.226864645153815	0.412495512367944	0.369990979864487	0.0999516230151696	0.999805500558022	FALSE
1869	PF3D7_1214000.iso1.exon2.amp1_2096	-0.0154752416704062	0.106211015206821	0.121686256877227	0.143942969107853	0.181860913017591	0.14593863480412	0.113793036367393	0.999805500558022	FALSE
1870	PF3D7_1215100.e1s1_8868	-0.0993513194759377	0.370292146281853	0.469643465757791	0.173686195192826	0.577595224717465	0.625046874009904	0.134247127330527	0.999805500558022	FALSE
1871	PF3D7_1215200.iso1.exon1.amp1_1558	-0.0506788806336478	-0.000952533811275558	0.0497263468223723	0.908705524897338	0.233257035383437	0.907209200639789	0.0221648391111405	0.999805500558022	FALSE
1872	PF3D7_1215400.1o1_8489	-0.0489683385184745	-0.0711348689780845	-0.02216653045961	0.933570879141507	0.451505803426972	0.536992706454786	-0.00800028065351412	0.999805500558022	FALSE
1873	PF3D7_1215900.1o1_5893	-0.0427339278010393	0.108996573974398	0.151730501775437	0.59756577683246	0.483938464190856	0.571349232982069	0.0511482086940048	0.999805500558022	FALSE
1874	PF3D7_1216300.iso1.exon1.amp1_2121	0.00118483006530185	0.0283755000487265	0.0271906699834246	0.746073981288744	0.379285784956623	0.112118477307473	0.0126043185974808	0.999805500558022	FALSE
1875	PF3D7_1216500.e1s1_7177	0.00320583706803675	0.123636194920979	0.120430357852943	0.617920659676178	0.175077055616948	0.495579769258095	0.0859502251437556	0.999805500558022	FALSE
1876	PF3D7_1216600_6846	-0.0638375800234383	0.0934750344122861	0.157312614435724	0.351699887523359	0.420841033853621	0.309995791178425	0.0639470591898897	0.999805500558022	FALSE
1877	PF3D7_1216900.e1s1_6556	0.0156101539609586	-0.056442947452528	-0.0720531014134866	0.64893539179163	0.400493693489769	0.299325212493303	-0.030748633700129	0.999805500558022	FALSE
1878	PF3D7_1217900.3o3_5875	-0.0214946523877734	0.0407483330953024	0.0622429854830758	0.914490304800593	0.185517909508567	1.21580618421138	0.0235020138724092	0.999805500558022	FALSE
1879	PF3D7_1218200.e1s2_6823	-0.0282520567004629	0.088374826613191	0.116626883313654	0.380939230479005	0.205231331309007	0.258357963911458	0.091777237027186	0.999805500558022	FALSE
1880	PF3D7_1218500.e3s1_4808	-0.0223437436178308	-0.019367570920307	0.0029761726975238	0.989730224743233	0.23048944431513	0.47963592159565	0.00183861028127743	0.999805500558022	FALSE
1881	PF3D7_1218600.e2s1_6329	-0.0991994306076512	-0.113329745575888	-0.0141303149682366	0.934682183253567	0.307209328318073	0.346665667049109	-0.00755211811871471	0.999805500558022	FALSE
1882	PF3D7_1219000.iso1.exon1.amp1_seg1_4603	-0.0182982599288838	0.00675015261206795	0.0250484125409518	0.88334019106466	0.314880485326915	0.341771420778539	0.0131288961071018	0.999805500558022	FALSE
1883	PF3D7_1219100.e1s1_9152	-0.109814748153249	0.129107129240077	0.238921877393325	0.138043878436882	0.519928969857188	0.261642037915143	0.0799778546867038	0.999805500558022	FALSE
1884	PF3D7_1219100.e1s2_9153	-0.0506648714695766	0.0522452844036017	0.102910155873178	0.66860121839143	0.334421472832557	0.486626495097187	0.0483726182827739	0.999805500558022	FALSE
1885	PF3D7_1219300.iso1.exon1.amp1_4486	-0.0811367936911043	0.106944110499322	0.188080904190426	0.383514690745901	0.240440763971096	0.424563520700672	0.117298983828144	0.999805500558022	FALSE
1886	PF3D7_1219600.iso1.exon3.amp1_2541	-0.0687536320584543	0.10540759824836	0.174161230306814	0.343118959566839	0.380344015139002	0.345628338591637	0.0770669725373162	0.999805500558022	FALSE
1887	PF3D7_1219600.iso1.exon3.amp2_2830	-0.000850419164811316	0.25189903534113	0.252749454505942	0.22910883834143	0.309703862292611	0.391996476276403	0.131683707064134	0.999805500558022	FALSE
1888	PF3D7_1219700.e1s1_6308	-0.101837301302129	0.108458324373114	0.210295625675243	0.353572167851639	0.26538616115145	0.442360307948115	0.120682610334067	0.999805500558022	FALSE
1889	PF3D7_1219800.iso1.exon1.amp1_616	-0.145286884809639	0.0870242410371102	0.232311125846749	0.0215218241835607	0.410092902012189	0.132452504387023	0.0994946082778426	0.999805500558022	FALSE
1890	PF3D7_1219900.1o1_5820	-0.0507217297576001	0.0613976659704331	0.112119395728033	0.660718453975403	0.368079158708379	0.515775202265056	0.0482506111027661	0.999805500558022	FALSE
1891	PF3D7_1220100.1o1_7044	0.00356155366467055	0.0278904202444206	0.0243288665797501	0.94931286189172	0.140739163712393	0.802773371516597	0.0135756224126781	0.999805500558022	FALSE
1892	PF3D7_1220300.iso1.exon1.amp1_2695	-0.0230011793456354	0.0149756341723233	0.0379768135179587	0.810475998847062	0.217743997049025	0.323299427050716	0.0272989330099144	0.999805500558022	FALSE
1893	PF3D7_1220600.2o4_7295	0.0398730492074458	0.0299859337526218	-0.009887115454824	0.949902626810149	0.371263887502743	0.304919751946046	-0.00452099215209385	0.999805500558022	FALSE
1894	PF3D7_1221000.e1s1_8662	-0.0530420361918847	-0.109547856021047	-0.0565058198291627	0.836391518791915	0.204390662711227	0.56928267352142	-0.0348221442547073	0.999805500558022	FALSE
1895	PF3D7_1221000.e1s3_4910	-0.150623999036983	0.233578037096746	0.384202036133729	0.544356602914919	0.751797303745571	1.27652847645908	0.0774555642049543	0.999805500558022	FALSE
1896	PF3D7_1221300.iso1.exon6.amp1_1262	0.0540858901914961	-0.013193190639856	-0.0672790808313521	0.895575929399428	0.413063815927873	1.06701443953343	-0.0212606636110287	0.999805500558022	FALSE
1897	PF3D7_1221400.e1s1_6610	-0.0313607936070476	0.0584435072060337	0.0898043008130813	0.593070063770412	0.141739127469743	0.343291484359794	0.0850747804724738	0.999805500558022	FALSE
1898	PF3D7_1221500.1o1_6483	-0.09067908128842	0.0479561969373471	0.138635278225767	0.158163956513955	0.393677999437195	0.142613824120206	0.0617482183992724	0.999805500558022	FALSE
1899	PF3D7_1221600.1o1_4708	-0.137609430686354	-0.118196511145387	0.0194129195409666	0.955094745983808	0.452970095197644	0.707856577835688	0.0066313019343038	0.999805500558022	FALSE
1900	PF3D7_1221900.1o1_9091	-0.0499073043755795	-0.00963151523042427	0.0402757891451552	0.767949362979063	0.352445370433038	0.258574570093474	0.0195540938071908	0.999805500558022	FALSE
1901	PF3D7_1222300.e1s1_9154	0.0466272600121853	-0.0452142574453781	-0.0918415174575634	0.839419639975393	0.308049655503438	0.944266558958634	-0.035740641538154	0.999805500558022	FALSE
1902	PF3D7_1222600 (renamed, has duplicates)_6843	-0.1330905842008	0.0508268506707925	0.183917434871593	0.492962698287116	0.526210665388876	0.519993489144002	0.0583283255613827	0.999805500558022	FALSE
1903	PF3D7_1222600.e1s1_5687	-0.0558444697844495	0.0840442500048411	0.139888719789291	0.443576896303602	0.308342541295436	0.356205722195785	0.0742459137679849	0.999805500558022	FALSE
1904	PF3D7_1222700.1o1_8121	0.0307831332983219	0.159974121729987	0.129190988431665	0.838899565369603	0.47535970095573	1.32220924340349	0.0342549277800633	0.999805500558022	FALSE
1905	PF3D7_1223100.e3s1_6322	-0.0593818997948071	-0.0489073070197424	0.0104745927750647	0.951422051140649	0.222689047291487	0.353256641066744	0.00725227650953113	0.999805500558022	FALSE
1906	PF3D7_1223600.1o2_8535	-0.0560636617998324	-0.112251080277842	-0.0561874184780098	0.676267629752656	0.466205127014566	0.229049224776163	-0.0209909471378405	0.999805500558022	FALSE
1907	PF3D7_1223600.e1_5670	-0.0720989071544554	-0.0315677026985295	0.0405312044559259	0.735801395095334	0.400261537082566	0.208986570716638	0.0176033068889844	0.999805500558022	FALSE
1908	PF3D7_1223600.e2s1_8263	-0.0228447531148797	0.0335880374537034	0.056432790568583	0.878318198160176	0.41837545302713	0.760402086137448	0.0200600404008081	0.999805500558022	FALSE
1909	PF3D7_1223700.1o2_5258	-0.0791658796532933	-0.0934772812329239	-0.0143114015796306	0.904705851802703	0.426982581711626	0.201296676003644	-0.00584448871941851	0.999805500558022	FALSE
1910	PF3D7_1223800.iso1.exon1.amp1_short_2872	-0.0687966174258238	0.0477436968122262	0.11654031423805	0.726610604676809	0.379562099195272	0.683143309519093	0.0457923297320934	0.999805500558022	FALSE
1911	PF3D7_1223900.iso1.exon1.amp1_106	-0.00528729600663616	-0.048277798582518	-0.0429905025758819	0.862694044910726	0.165847348105337	0.518391513857671	-0.0307460368230663	0.999805500558022	FALSE
1912	PF3D7_1224200.1o5_7077	-0.0305235697657716	0.158795092789594	0.189318662555365	0.411429841212244	0.206289963204501	0.458168143256717	0.127596581400627	0.999805500558022	FALSE
1913	PF3D7_1224500.2o2_4969	-0.0931052823848256	0.142525590806358	0.235630873191183	0.206441145175574	0.581897157582469	0.313581188867941	0.0703182456885537	0.999805500558022	FALSE
1914	PF3D7_1225600.e2s1_7774	-0.0363700428932456	0.0565040339031533	0.0928740767963989	0.243175478828107	0.160852091335609	0.146309896489977	0.0971678085850533	0.999805500558022	FALSE
1915	PF3D7_1226000.e1_5411	-0.0279400089153223	0.0122008684354505	0.0401408773507728	0.897934392297136	0.155303176145616	0.654908458274798	0.0254513812447185	0.999805500558022	FALSE
1916	PF3D7_1226100.1o1_4971	-0.0339842610482023	0.101811294499097	0.135795555547299	0.533399964611497	0.312916181559425	0.434983041658598	0.0688495739362897	0.999805500558022	FALSE
1917	PF3D7_1226300.e1s1_6601	-0.0480016174319567	0.0527903459298564	0.100791963361813	0.121504541502072	0.206405770641726	0.105552015501082	0.0849462752750428	0.999805500558022	FALSE
1918	PF3D7_1226400.iso1.exon3.amp1_1587	-0.135937714942847	0.0769585853833537	0.212896300326201	0.258688483652481	0.334263143925808	0.351838711076126	0.105521245524996	0.999805500558022	FALSE
1919	PF3D7_1226800.2o5_6721	-0.0937603137199845	0.0412066326264299	0.134966946346414	0.221493456742063	0.279407954415518	0.195963701182784	0.0828812541780416	0.999805500558022	FALSE
1920	PF3D7_1227100.e1s1_4898	-0.0984278638716846	-0.0385536665667303	0.0598741973049543	0.728375231841251	0.6637398555505	0.274860170733853	0.015778339640142	0.999805500558022	FALSE
1921	PF3D7_1227200.iso1.exon1.amp2_815	-0.023783073399426	0.18572801234411	0.209511085743536	0.491615027959312	0.315742341243925	0.611871011313199	0.0967666744215397	0.999805500558022	FALSE
1922	PF3D7_1227300.e1s2_8357	-0.0783510664586624	-0.0124865578100177	0.0658645086486446	0.724602236049055	0.350876678252009	0.371397799737425	0.0310785126970785	0.999805500558022	FALSE
1923	PF3D7_1227500.2o2_5357	-0.0164847142608096	0.0204269523236178	0.0369116665844274	0.790980572299276	0.425519082668249	0.251570162836908	0.015010103689934	0.999805500558022	FALSE
1924	PF3D7_1228100.iso1.exon2.amp1_2994	0.0103393184681245	0.209918844329307	0.199579525861182	0.533199071448479	0.455593671285492	0.639267129480489	0.0693723007615474	0.999805500558022	FALSE
1925	PF3D7_1228100.iso1.exon3.amp1_2404	-0.0332829316345066	0.0536415094120784	0.086924441046585	0.48164611143292	0.236154057222628	0.239751286797951	0.0612429159975482	0.999805500558022	FALSE
1926	PF3D7_1228300.iso1.exon1.amp1_2480	-0.0152418585012376	0.226475578091095	0.241717436592333	0.0854940027970671	0.254070489350755	0.238305522520162	0.159633254002011	0.999805500558022	FALSE
1927	PF3D7_1228400.s2_4794	-0.0334352385382796	-0.0275450406943115	0.00589019784396812	0.969629481866451	0.530016781026412	0.266732711306665	0.00193418227988367	0.999805500558022	FALSE
1928	PF3D7_1228600.e1s1_5187	-0.0143549848362974	0.13130189435702	0.145656879193317	0.383393575805073	0.254096748050323	0.324740468927731	0.0923450502589083	0.999805500558022	FALSE
1929	PF3D7_1228700.iso1.exon1.amp1_seg2_1438	-0.0747444822072851	0.0105319975784926	0.0852764797857778	0.814475094540567	0.256327994100379	0.756057663363821	0.0407047772575733	0.999805500558022	FALSE
1930	PF3D7_1228800.e1s1_8000	-0.0907684392250828	0.059112819963201	0.149881259188284	0.512198708344481	0.527324903658383	0.434918119213096	0.0482362275104023	0.999805500558022	FALSE
1931	PF3D7_1228800.e1s4_5484	-0.0205776829472188	0.264026868883738	0.284604551830957	0.222230773778506	0.145384670224726	0.439654845187288	0.236387083583655	0.999805500558022	FALSE
1932	PF3D7_1229300.1o1_8528	-0.0328023046020891	0.0369908861907913	0.0697931907928803	0.695456512580338	0.603137814389397	0.307452541438825	0.0201316983619199	0.999805500558022	FALSE
1933	PF3D7_1229600.iso1.exon2.amp1_804	-0.158418618786978	0.0481125956959627	0.206531214482941	0.335099312633673	0.510784348024097	0.394966886992839	0.0689479429582003	0.999805500558022	FALSE
1934	PF3D7_1229600.iso1.exon2.amp2_1093	-0.124995147510177	0.0028103829315711	0.127805530441748	0.696857299560888	0.478372021047836	0.663666490364003	0.0424028144337169	0.999805500558022	FALSE
1935	PF3D7_1230000.iso1.exon10.amp2_1646	-0.0316387438993257	-0.0179772173749189	0.0136615265244068	0.958673585045365	0.317015143198487	0.543445716400871	0.00651488514276244	0.999805500558022	FALSE
1936	PF3D7_1230000.iso1.exon2.amp1_2063	-0.0610344260288954	-0.0293953895826991	0.0316390364461962	0.737836777749285	0.295778917170191	0.168918925211161	0.0185354796509855	0.999805500558022	FALSE
1937	PF3D7_1230000.iso1.exon6.amp1_333	-0.0896834356563487	-0.0299062082809318	0.059777227375417	0.581555676589819	0.366849772352884	0.185934260140925	0.028353674159931	0.999805500558022	FALSE
1938	PF3D7_1230400.5o5_7268	-0.0297349440221642	0.0260742154164479	0.0558091594386121	0.552777169614799	0.307022500543346	0.163440622009372	0.0315792135987932	0.999805500558022	FALSE
1939	PF3D7_1230600.iso1.exon1.amp1_71	-0.0915290296638754	0.019419157095836	0.110948186759711	0.0840143951538216	0.190582524792598	0.10367031447093	0.101059099417588	0.999805500558022	FALSE
1940	PF3D7_1230700.1o1_6777	-0.089157600748888	0.00643553606260276	0.0955931368114907	0.603399061706363	0.450121615795436	0.34923800984222	0.0362049199433486	0.999805500558022	FALSE
1941	PF3D7_1231000.iso1.exon7.amp1_4124	-0.135995578569251	0.0449149518670648	0.180910530436316	0.443236782067213	0.469078107778376	0.453669272354711	0.0645107597417565	0.999805500558022	FALSE
1942	PF3D7_1231400.iso1.exon4.amp1_924	-0.112099953155585	-0.0665031318711087	0.0455968212844766	0.72924973319349	0.452703899408155	0.225689011015217	0.0175348418574774	0.999805500558022	FALSE
1943	PF3D7_1231500.1o1_4656	-0.0350881457430685	-0.192299122758366	-0.157210977015298	0.238028612160516	0.253893958024156	0.245779000752435	-0.10356243546741	0.999805500558022	FALSE
1944	PF3D7_1231600.iso1.exon1.amp2_1920	-0.0458849831274558	0.0837241916672976	0.129609174794753	0.664861645593584	0.381467593366543	0.607940165051385	0.0523276328974657	0.999805500558022	FALSE
1945	PF3D7_1232000.1o2_6457	-0.0505227539731243	0.161023341479708	0.211546095452832	0.0326355989550194	0.210203198822616	0.154467953861075	0.172189483556904	0.999805500558022	FALSE
1946	PF3D7_1232100.e1_8842	-0.0762879301456871	0.377246725556646	0.453534655702333	0.137759141490098	0.196864429047706	0.547464425966194	0.290402439311746	0.999805500558022	FALSE
1947	PF3D7_1232100.e2_4807	-0.00963070370190646	-0.036972246560115	-0.0273415428582085	0.666312479984957	0.191510239393733	0.114406282189341	-0.024693296886599	0.999805500558022	FALSE
1948	PF3D7_1232600.iso1.exon1.amp1_709	-0.0662827919884113	0.133042495773256	0.199325287761667	0.41462628377967	0.299173285515572	0.482206385620264	0.102329286627619	0.999805500558022	FALSE
1949	PF3D7_1232700.iso1.exon1.amp1_3259	-0.0354338909397815	0.11586901223429	0.151302903174072	0.767538086743637	0.279544956590917	1.06530378309621	0.0570238567828292	0.999805500558022	FALSE
1950	PF3D7_1233200.iso2.exon1.amp1_3096	-0.104771575316843	0.0969796311860453	0.201751206502889	0.103934001357934	0.558907677144213	0.154514912108108	0.0635091599562533	0.999805500558022	FALSE
1951	PF3D7_1233200.iso2.exon1.amp2_seg2_2883	-0.061920271820477	0.0199183713390347	0.0818386431595118	0.48162661684528	0.397373275170522	0.196871017725301	0.0358610118709276	0.999805500558022	FALSE
1952	PF3D7_1233200.iso2.exon1.amp3_seg1_1729	-0.0990308531198879	-0.176778504926818	-0.0777476518069305	0.657874050101155	0.570271975689091	0.307895195343095	-0.0236732915365351	0.999805500558022	FALSE
1953	PF3D7_1233300.s1_7401	0.0796990161042135	0.076667983163566	-0.00303103294064754	0.984172740676083	0.321336709896124	0.301561312298573	-0.00158261978548927	0.999805500558022	FALSE
1954	PF3D7_1233300.s2_5950	-0.0750673662254199	0.0781286198719069	0.153195986097327	0.685180566316176	0.21375890086208	0.78213053862534	0.0774836120751745	0.999805500558022	FALSE
1955	PF3D7_1233400.1o4_5291	-0.035439503986161	-0.0672067873553509	-0.0317672833691898	0.789369846074685	0.401670218080432	0.205917318770267	-0.0137567705247647	0.999805500558022	FALSE
1956	PF3D7_1233600.e1s3_8293	-0.0240046495128083	0.0281423602864777	0.052147009799286	0.910920097606247	0.196515754365303	0.976590417483461	0.0232034940331371	0.999805500558022	FALSE
1957	PF3D7_1233700.iso1.exon1.amp1_1031	-0.0840253565705191	0.0875690218884628	0.171594378458982	0.664674257407856	0.288293748770999	0.815864115980337	0.0743804847651799	0.999805500558022	FALSE
1958	PF3D7_1233800.3o3_4664	0.0375391430644012	-0.112216977057431	-0.149756120121832	0.409802630370576	0.295690479482901	0.3533962382236	-0.0824704367602562	0.999805500558022	FALSE
1959	PF3D7_1234300.2o2_6755	-0.0255024764945702	-0.0527898705544423	-0.0272873940598721	0.936183352163689	0.287722656895814	0.709330356515001	-0.0126383406203576	0.999805500558022	FALSE
1960	PF3D7_1234600.iso1.exon1.amp1_2569	-0.0244946205403443	0.167099921457996	0.19159454199834	0.190503511664846	0.248826456380052	0.266941530770816	0.12726957029124	0.999805500558022	FALSE
1961	PF3D7_1234600.iso1.exon1.amp2_3083	0.0543567444612555	0.0795326623359994	0.0251759178747439	0.959232381405217	0.242728206841755	1.0317480451119	0.0101573951090538	0.999805500558022	FALSE
1962	PF3D7_1234700.iso1.exon2.amp1_2955	-0.00134588647467242	-0.0595694261075607	-0.0582235396328883	0.626950684496061	0.279812906204998	0.229688363493927	-0.0353261019503421	0.999805500558022	FALSE
1963	PF3D7_1234800.e1s1_7490	-0.0687833768668681	-0.151187868965876	-0.0824044920990077	0.850315741758171	0.242705612211947	0.911891625378582	-0.0360979834419674	0.999805500558022	FALSE
1964	PF3D7_1234800.e1s2_8941	-0.0374621636946907	0.44987374406158	0.487335907756271	0.161735227593799	0.317081257544967	0.634028767268506	0.221854249600258	0.999805500558022	FALSE
1965	PF3D7_1235000.iso1.exon2.amp1_3863	-0.0863450505031701	-0.130757824026095	-0.0444127735229251	0.871753783783207	0.171108841477592	0.574329337891761	-0.0295670176405038	0.999805500558022	FALSE
1966	PF3D7_1235000.iso1.exon3.amp1_650	-0.131683304431362	-0.0608970766457052	0.0707862277856573	0.581654636657611	0.471307971623069	0.210500792530947	0.0262253232851094	0.999805500558022	FALSE
1967	PF3D7_1235200.iso1.exon2.amp1_3400	-0.0427244465602479	0.0349398172778969	0.0776642638381448	0.741837663470121	0.455758414079748	0.467315168332498	0.0283204195524344	0.999805500558022	FALSE
1968	PF3D7_1235200.iso1.exon2.amp2_2539	-0.0651306923007571	0.0659242077630406	0.131054900063798	0.440014828610656	0.518859478728174	0.29951471356288	0.0437488835117658	0.999805500558022	FALSE
1969	PF3D7_1235400.e1s2_5177	-0.00710617415280715	-0.0348022791625382	-0.0276961050097311	0.78531212654904	0.160236758432899	0.205641581911229	-0.0278246732183141	0.999805500558022	FALSE
1970	PF3D7_1235800.iso1.exon4.amp1_2414	-0.0138694264854053	0.183801542791036	0.197670969276441	0.297392999533635	0.192678019144697	0.365924213339043	0.150565375482786	0.999805500558022	FALSE
1971	PF3D7_1236000.1o1_6739	0.00574733742450626	-0.00608634713053711	-0.0118336845550434	0.983701845768401	0.374554898859173	1.21090090290013	-0.00367753245977114	0.999805500558022	FALSE
1972	PF3D7_1236100.e2s1_7758	-0.226626493259948	0.0740178873658365	0.300644380625784	0.169857902332797	0.800430571915509	0.340231751441648	0.0656605944533031	0.999805500558022	FALSE
1973	PF3D7_1236200.iso1.exon1.amp2_4226	-0.0283533354779109	0.308080706035092	0.336434041513003	0.272353257267619	0.343929172751854	0.585355334292836	0.148167769206684	0.999805500558022	FALSE
1974	PF3D7_1236300.1o1_5000	0.0340700992592036	-0.137822273082275	-0.171892372341479	0.105541761761116	0.232983693984152	0.181570451272458	-0.12573794045295	0.999805500558022	FALSE
1975	PF3D7_1236500.1o1_7853	0.203668038720946	0.0866483644010515	-0.117019674319895	0.74645944128703	0.878328297118193	0.693944962961419	-0.0226836089187814	0.999805500558022	FALSE
1976	PF3D7_1237300.iso1.exon3.amp1_116	-0.0749527710655098	0.275820674098024	0.350773445163534	0.228538853254788	0.161333866535629	0.551151994050867	0.245111006069047	0.999805500558022	FALSE
1977	PF3D7_1237400.3o3_5573	-0.0352731818285022	0.180666375546484	0.215939557374986	0.329247533243118	0.220490990360649	0.430971212772825	0.142427649855581	0.999805500558022	FALSE
1978	PF3D7_1237400.e3_7403	-0.0449250770949078	0.088528340741901	0.133453417836809	0.624897499588873	0.241875152547758	0.558821199150091	0.075538118143285	0.999805500558022	FALSE
1979	PF3D7_1237900.iso1.exon1.amp1_4591	0.00138212550488426	0.152352718238126	0.150970592733242	0.779478186330405	0.164698328664477	1.12581911138991	0.0619549791108367	0.999805500558022	FALSE
1980	PF3D7_1238200.iso1.exon1.amp1_3886	-0.0162351551551358	0.0884395078639383	0.104674663019074	0.272634874389745	0.139438359933842	0.18074518742773	0.120638645596682	0.999805500558022	FALSE
1981	PF3D7_1238400.iso1.exon4.amp1_630	-0.0671885634164179	-0.00394117200751118	0.0632473914089067	0.892804360369454	0.254839033311257	0.981498412701565	0.0259692398898454	0.999805500558022	FALSE
1982	PF3D7_1238600.iso1.exon1.amp1_1581	-0.0752769841342763	-0.00711111641432005	0.0681658677199563	0.871296598896058	0.367747565785305	0.87396506779719	0.0250873004644992	0.999805500558022	FALSE
1983	PF3D7_1238800.e1s1_6061	-0.16808125764125	0.171841384187491	0.339922641828742	0.399374395573789	0.582076060418978	0.78840832067951	0.0931090437480916	0.999805500558022	FALSE
1984	PF3D7_1239200.e1s2_7139	-0.0510394343470701	0.165856159742733	0.216895594089803	0.263600603931447	0.331372093113144	0.363584183901256	0.107874715362226	0.999805500558022	FALSE
1985	PF3D7_1239400.1o1_5240	0.0253502353031383	-0.0385053665736685	-0.0638556018768068	0.74105026719776	0.181786121872173	0.398529067653974	-0.0490793450089113	0.999805500558022	FALSE
1986	PF3D7_1239600.1o1_9028	-0.0291056749193409	0.0455389726399378	0.0746446475592787	0.441799551070773	0.403982211964035	0.141950974533353	0.0324142302409791	0.999805500558022	FALSE
1987	PF3D7_1239700.e1s1_5983	-0.0734145763940505	0.107375924556943	0.180790500950993	0.596271841971656	0.232996728851408	0.699472277852405	0.0940616852971206	0.999805500558022	FALSE
1988	PF3D7_1239800.s5_6570	0.00324692381535396	0.0820042091032441	0.0787572852878901	0.448747519961161	0.258086711846647	0.193757859772462	0.0521394411338287	0.999805500558022	FALSE
1989	PF3D7_1240000.iso1.exon1.amp1_735	-0.0353577348114782	0.00327813391921836	0.0386358687306966	0.761436397934449	0.367894897322792	0.233921923298831	0.0181128326752437	0.999805500558022	FALSE
1990	PF3D7_1240300.iso1.exon1.amp2_2520	-3.20393624013973e-05	0.151087870572502	0.151119909934903	0.522435167375963	0.154693539410319	0.480262627368128	0.116302126744093	0.999805500558022	FALSE
1991	PF3D7_1240300.iso1.exon2.amp1_4487	-0.12476041091803	0.103323254767612	0.228083665685643	0.204013279566267	0.291758319462201	0.330178136137844	0.128307010208575	0.999805500558022	FALSE
1992	PF3D7_1240400.iso1.exon2.amp1_1013	0.0419360642287379	0.117811602631937	0.075875538403199	0.702928613917364	0.42918129240036	0.388139829284644	0.0297679323811572	0.999805500558022	FALSE
1993	PF3D7_1240600.iso1.exon2.amp1_2168	-0.0571636148432717	-0.0356068396279735	0.0215567752152982	0.908479448027337	0.167705825632799	0.389665636770765	0.0175579809619309	0.999805500558022	FALSE
1994	PF3D7_1240900.iso1.exon3.amp1_1880	-0.0428531921675115	0.128747189269165	0.171600381436677	0.0281977366757613	0.339513149406284	0.0967387051691071	0.0888984259679965	0.999805500558022	FALSE
1995	PF3D7_1240900.iso1.exon4.amp2_3972	-0.0675948270293612	0.0013673955246233	0.0689622225539845	0.514522996134455	0.381508167705686	0.174412711350006	0.0315451252965064	0.999805500558022	FALSE
1996	PF3D7_1241300.iso1.exon1.amp1_2759	-0.0419801423815675	0.0677014559805407	0.109681598362108	0.753686483315446	0.324831675788388	0.721640949671337	0.0469412719646169	0.999805500558022	FALSE
1997	PF3D7_1241400.iso1.exon1.amp2_seg2_276	-0.121267152336721	0.00936773384778924	0.13063488618451	0.214284996167132	0.450566516298873	0.144783545625166	0.0509261034578938	0.999805500558022	FALSE
1998	PF3D7_1241700.e2s1_7179	-0.0692819594887715	-0.0700264074140254	-0.000744447925253855	0.992358127470118	0.283765059973542	0.129201527681083	-0.00045787298985799	0.999805500558022	FALSE
1999	PF3D7_1242800.e4s1_7480	-0.0656006228597232	0.059793635433935	0.125394258293658	0.426609145893012	0.311872050190649	0.302688789850016	0.0672286598428142	0.999805500558022	FALSE
[truncated: 805 more rows]
