# Supplementary material for: Proteome-wide analysis of a malaria vaccine study reveals personalized humoral immune profiles in Tanzanian adults
Source: eLife. 2020 Jul 14;9:e53080. doi: 10.7554/eLife.53080 (PMC7386907; doi:10.7554/eLife.53080)
Supplement: Figure 5—source data 1. [file elife-53080-fig5-data1.csv]

Protected versus non protected at baseline
	protein_ID	mean_seorpositivy_group1	mean_seorpositivy_group2	log_FC	p_value	sd1	sd2	size_eff	adj.p_value	is_threshold_reached
1	MAL13P1.303e4s1_6254	-0.546798256	-0.882639966	-0.33584171	0.01663481	0.383277083	0.207287449	-0.152142007	0.61340006	FALSE
2	MAL8P1.143_14o15_5934	-0.006748161	0.983045831	0.989793992	0.167267433	1.000327066	1.301175131	0.158915852	0.924994436	FALSE
3	MAL8P1.143_3o15_6506	-0.059100335	-0.062231348	-0.003131013	0.995309445	0.993917255	1.066399294	-0.000520675	0.999164392	FALSE
4	PF3D7_0100100.iso1.exon2.amp1_1871	0.348465502	1.055518195	0.707052693	0.364642013	1.257466828	1.504854197	0.091541779	0.978054103	FALSE
5	PF3D7_0100200.iso1.exon1.amp1_706	0.110901167	0.476523049	0.365621882	0.610877785	1.015960771	1.446370822	0.056825677	0.978203774	FALSE
6	PF3D7_0100300.iso1.exon1.amp1_1010	-0.055280504	0.261792071	0.317072575	0.571069421	0.90084155	1.113510658	0.057014054	0.978054103	FALSE
7	PF3D7_0100300.iso1.exon2.amp1_1317	-0.08842398	-0.327931238	-0.239507258	0.384799141	0.660929489	0.51201038	-0.061784705	0.978054103	FALSE
8	PF3D7_0100400.iso1.exon2.amp1_991	0.406351005	1.2116595	0.805308495	0.374737091	1.142115412	1.774663676	0.10924582	0.978054103	FALSE
9	PF3D7_0100600.iso1.exon1.amp1_2163	1.142983194	1.8331633	0.690180106	0.193868065	1.339648929	0.934924956	0.088422567	0.947383632	FALSE
10	PF3D7_0100800.iso1.exon2.amp1_133	-0.076593201	-0.109535136	-0.032941935	0.937858949	0.802993051	0.844112804	-0.006797769	0.998284684	FALSE
11	PF3D7_0100900.iso1.exon1.amp1_2446	0.447081857	1.449083047	1.00200119	0.159623749	0.921698352	1.289890753	0.172247136	0.916954512	FALSE
12	PF3D7_0101000.iso1.exon1.amp1_2157	-0.168377106	-0.082886369	0.085490737	0.861480313	1.055012756	0.962172681	0.013633522	0.993519608	FALSE
13	PF3D7_0101100.iso1.exon1.amp1_3004	-0.420424225	-0.518811745	-0.09838752	0.707538138	0.805088322	0.471425151	-0.021154783	0.978203774	FALSE
14	PF3D7_0101300.iso1.exon2.amp1_4146	0.286724028	1.040878322	0.754154294	0.258969644	1.0118422	1.258028861	0.120617708	0.976799056	FALSE
15	PF3D7_0101600.iso1.exon1.amp1_3887	0.182297871	0.8346916	0.652393729	0.343746072	1.213588534	1.315755231	0.088734893	0.978054103	FALSE
16	PF3D7_0101800.iso1.exon1.amp1_2719	0.76819976	1.113003733	0.344803973	0.642598375	1.311170046	1.476824897	0.043189197	0.978203774	FALSE
17	PF3D7_0101900.iso1.exon1.amp1_123	0.499591861	0.729741907	0.230150046	0.707395636	1.09891024	1.222409514	0.034454349	0.978203774	FALSE
18	PF3D7_0102200.e1s1_8021	-1.086990664	-0.53136935	0.555621314	0.063999326	0.560730271	0.495448663	0.167197624	0.862760147	FALSE
19	PF3D7_0102200.e2s1_7477	0.935322116	1.059710245	0.124388129	0.901112055	1.475533142	2.041028286	0.013387183	0.998284684	FALSE
20	PF3D7_0102200.e2s2_7188	0.745390313	1.356026986	0.610636673	0.513811785	1.154305923	1.873966373	0.081105571	0.978054103	FALSE
21	PF3D7_0102500.e1s2_8945	-0.533555076	-0.233657296	0.299897781	0.614228914	0.627179643	1.21188261	0.069796584	0.978203774	FALSE
22	PF3D7_0102600.2o3_6170	-0.080512381	-0.018358409	0.062153972	0.917148493	0.83254071	1.222509261	0.011712978	0.998284684	FALSE
23	PF3D7_0102700.2o2_7571	-0.495835894	-0.392000789	0.103835105	0.746705358	0.599900524	0.639791024	0.028630133	0.980535118	FALSE
24	PF3D7_0103400.e1s1_5925	-0.312672862	-0.285566032	0.02710683	0.953964816	0.581819538	0.966659256	0.007101441	0.998284684	FALSE
25	PF3D7_0103500.2o7_7085	-0.697959073	-0.326955236	0.371003837	0.621277621	0.82486956	1.528724143	0.066504481	0.978203774	FALSE
26	PF3D7_0103800.e4s1_7155	-0.488578223	-0.489735014	-0.001156791	0.997546119	0.746227526	0.747977426	-0.000258297	0.999164392	FALSE
27	PF3D7_0103900.1o1_9076	0.039140247	-0.022315344	-0.061455592	0.916369511	0.684349391	1.207013224	-0.013470428	0.998284684	FALSE
28	PF3D7_0104000.3o3_6106	-0.375822849	-0.15077931	0.225043539	0.513943743	0.925774713	0.636469149	0.041756249	0.978054103	FALSE
29	PF3D7_0104100.1o2_5053	-0.733027348	-0.763172692	-0.030145345	0.886162922	0.670746053	0.375127452	-0.007793974	0.9967683	FALSE
30	PF3D7_0104100.2o2_5342	-0.535026994	0.102961547	0.637988541	0.213930666	0.652031405	0.955998774	0.153563424	0.956958241	FALSE
31	PF3D7_0104600.e1s1_7213	-0.957118342	-0.743770478	0.213347863	0.714526133	0.558374762	1.200494711	0.053772632	0.978203774	FALSE
32	PF3D7_0105600.e2_4833	-0.66466593	-0.648073479	0.016592451	0.942039038	0.489143751	0.449089419	0.005703558	0.998284684	FALSE
33	PF3D7_0105700.iso1.exon1.amp2_233	-0.75846434	-0.298706925	0.459757415	0.354064188	0.570549805	0.968698873	0.122134412	0.978054103	FALSE
34	PF3D7_0105700.iso1.exon1.amp3_522	-0.264708403	-0.111990542	0.152717862	0.668582438	0.589445709	0.71427578	0.042099578	0.978203774	FALSE
35	PF3D7_0105900.iso1.exon1.amp1_short_2005	-0.524602967	-0.697687844	-0.173084877	0.429065284	0.383539943	0.424846956	-0.074282809	0.978054103	FALSE
36	PF3D7_0106200.iso1.exon1.amp1_3577	-0.31633217	-0.519930228	-0.203598058	0.471503916	0.455916633	0.555726738	-0.07249731	0.978054103	FALSE
37	PF3D7_0106500.iso1.exon1.amp1_2562	-0.567493952	-0.315886758	0.251607193	0.558419154	0.641815524	0.858335622	0.062650468	0.978054103	FALSE
38	PF3D7_0107900.iso1.exon1.amp1_696	-0.696643117	-0.973424714	-0.276781597	0.383549624	0.766980344	0.589343438	-0.061562398	0.978054103	FALSE
39	PF3D7_0108000.e1s1_7463	-0.375730635	-0.925613302	-0.549882668	0.000304896	0.71654411	0.127039577	-0.13539436	0.142488201	FALSE
40	PF3D7_0108300.s1_7972	0.153191465	0.145884187	-0.007307278	0.989665339	1.181500161	1.114091641	-0.001037198	0.998284684	FALSE
41	PF3D7_0108300.s2_7111	0.810889076	0.560887867	-0.250001209	0.653755693	1.035094731	1.103469254	-0.03995238	0.978203774	FALSE
42	PF3D7_0108300.s3_7689	0.15784258	0.281141475	0.123298896	0.799825429	1.214703219	0.928803442	0.017321972	0.982733913	FALSE
43	PF3D7_0108400.iso1.exon1.amp1_short_3733	-0.378988097	-0.693413939	-0.314425843	0.232637057	0.416017047	0.490568051	-0.123319672	0.956958241	FALSE
44	PF3D7_0108400.iso1.exon7.amp1_45	-0.193294858	0.207208184	0.400503042	0.263174061	0.506373187	0.67684813	0.126411897	0.978054103	FALSE
45	PF3D7_0108600.iso1.exon4.amp1_4380	-0.027836899	-0.275579156	-0.247742256	0.334819759	0.557315984	0.479809688	-0.07517667	0.978054103	FALSE
46	PF3D7_0108600.iso1.exon5.amp1_634	-0.366645304	-0.394328463	-0.027683158	0.870650524	0.289560144	0.342799583	-0.015590051	0.995523014	FALSE
47	PF3D7_0108700.e1s1_7776	-0.11887018	0.382849402	0.501719582	0.248912048	0.901127027	0.799623765	0.093910611	0.968457025	FALSE
48	PF3D7_0108800.iso1.exon6.amp1_1233	-0.134099025	0.153834416	0.287933441	0.423690544	0.489231679	0.708548572	0.092606136	0.978054103	FALSE
49	PF3D7_0109200.iso1.exon1.amp1_2413	-0.705070994	-0.837130595	-0.132059601	0.461550936	0.378670589	0.343329139	-0.058707509	0.978054103	FALSE
50	PF3D7_0109800.1o1_7336	-0.488784999	-0.374563506	0.114221493	0.769604107	0.51178401	0.796568397	0.034565603	0.982640702	FALSE
51	PF3D7_0109900.iso2.exon16.amp1_324	-0.37122358	-0.659135344	-0.287911765	0.349580464	0.686541725	0.574552517	-0.071087574	0.978054103	FALSE
52	PF3D7_0110000.1o1_8428	-0.478389024	-0.126824872	0.351564152	0.380071543	0.915218774	0.749220566	0.06522836	0.978054103	FALSE
53	PF3D7_0110500.e1s2_5766	-0.093309458	0.341938667	0.435248125	0.326348277	0.77454819	0.843950876	0.09269707	0.978054103	FALSE
54	PF3D7_0110500.e1s3_5188	-0.962736833	-1.157932305	-0.195195472	0.470916691	0.767937272	0.490580147	-0.043829349	0.978054103	FALSE
55	PF3D7_0110600.e1s1_6533	-0.490099268	-0.695924105	-0.205824838	0.487039412	0.779777824	0.547647128	-0.045285604	0.978054103	FALSE
56	PF3D7_0110600.e3_5665	-0.401457943	-0.166341536	0.235116407	0.653305047	0.558310573	1.069473195	0.061638763	0.978203774	FALSE
57	PF3D7_0110700.e1s1_7186	-0.597918996	-0.559996198	0.037922798	0.875246334	0.359090273	0.491946218	0.016801871	0.995846326	FALSE
58	PF3D7_0110800.iso1.exon3.amp1_2717	-0.549986686	-0.455547839	0.094438846	0.65369344	0.48257468	0.405622246	0.033161506	0.978203774	FALSE
59	PF3D7_0111000.e1s2_6049	-0.524949165	-0.072032422	0.452916743	0.408077432	0.776350328	1.072750438	0.092663437	0.978054103	FALSE
60	PF3D7_0111000.e5s1_5681	-0.462625697	-0.59472203	-0.132096333	0.324323083	0.383369806	0.237383363	-0.059502125	0.978054103	FALSE
61	PF3D7_0111300.iso1.exon1.amp1_1701	-0.406496647	-0.317361767	0.08913488	0.612102867	0.431522891	0.333629593	0.035222597	0.978203774	FALSE
62	PF3D7_0111500.e4s1_8619	0.573239558	0.703352905	0.130113347	0.678071656	0.918499141	0.57161956	0.024456922	0.978203774	FALSE
63	PF3D7_0111500.e5s1_5099	-0.427617432	-0.735020177	-0.307402745	0.245710798	0.659974759	0.474633136	-0.079799819	0.963001913	FALSE
64	PF3D7_0111700.iso1.exon1.amp1_961	-0.443325146	-0.49547722	-0.052152074	0.453882754	0.352931895	0.069312956	-0.026059212	0.978054103	FALSE
65	PF3D7_0112000.3o4_5862	0.599034572	0.803668112	0.204633541	0.599865878	1.020099361	0.729910469	0.034378665	0.978203774	FALSE
66	PF3D7_0112100.1o1_6684	0.094455747	0.688327913	0.593872166	0.336639849	0.623542784	1.205522187	0.138996246	0.978054103	FALSE
67	PF3D7_0112200.iso1.exon1.amp2_183	0.209910056	0.261459563	0.051549507	0.901232066	0.800347605	0.82807254	0.010693028	0.998284684	FALSE
68	PF3D7_0113100.iso1.exon1.amp1_4475	-0.167430484	0.353030294	0.520460778	0.527660509	0.707382982	1.670076693	0.099850483	0.978054103	FALSE
69	PF3D7_0113100.iso1.exon2.amp1_4270	-0.941624231	-0.89257614	0.049048091	0.880126028	0.628105417	0.647934559	0.012968698	0.996647775	FALSE
70	PF3D7_0113100.iso1.exon2.amp2_3349	-0.631914801	-0.439529361	0.19238544	0.615754664	0.553170954	0.771076623	0.055147239	0.978203774	FALSE
71	PF3D7_0113300.2o2_5313	-1.219960872	-0.922254696	0.297706176	0.156040614	0.922757933	0.275660117	0.056717376	0.916954512	FALSE
72	PF3D7_0113400.2o2_8752	0.084658999	0.389035777	0.304376778	0.678672357	0.957449065	1.493044635	0.049213902	0.978203774	FALSE
73	PF3D7_0113800.2o4_7664	0.004932771	0.478297924	0.473365152	0.14506599	0.729406932	0.568145727	0.110605791	0.916954512	FALSE
74	PF3D7_0113800.3o4_7092	-0.314545834	-0.760490638	-0.445944804	0.05117165	0.664240555	0.359581397	-0.116565102	0.820283309	FALSE
75	PF3D7_0113900.2o2_5532	-0.50514476	0.488936246	0.994081006	0.082072617	0.56894529	0.967087557	0.26474122	0.912416971	FALSE
76	PF3D7_0114000.e2s2_8371	-0.733075243	-0.454834787	0.278240456	0.561726197	0.630934287	0.96376937	0.068593948	0.978054103	FALSE
77	PF3D7_0114100.iso1.exon1.amp1_2718	-0.084405862	0.058302912	0.142708774	0.767397653	0.92393381	0.958515615	0.025634591	0.982640702	FALSE
78	PF3D7_0115000.e1s1_6895	-0.1929596	-0.082782084	0.110177516	0.734316027	0.405199424	0.663329434	0.041601624	0.980535118	FALSE
79	PF3D7_0115200.iso1.exon2.amp1_719	0.269736012	0.450733823	0.180997811	0.72812118	0.883897393	1.044197384	0.033402515	0.979377415	FALSE
80	PF3D7_0115300.iso1.exon2.amp1_1279	-0.273323593	0.833944322	1.107267915	0.107094445	0.631606614	1.196794881	0.257469821	0.912416971	FALSE
81	PF3D7_0115400.iso1.exon2.amp1_2714	0.496571001	1.027248698	0.530677697	0.38794252	1.348929493	1.157868886	0.066548119	0.978054103	FALSE
82	PF3D7_0115700.iso1.exon1.amp1_1583	0.97096474	2.391387159	1.42042242	0.057776317	1.343479273	1.22578581	0.177875253	0.848192638	FALSE
83	PF3D7_0115700.iso1.exon2.amp2_4262	-0.699529832	-0.358450204	0.341079628	0.380712483	0.524336276	0.760095937	0.102335009	0.978054103	FALSE
84	PF3D7_0200100 (renamed)_4770	0.026336388	0.096583252	0.070246865	0.867637413	0.933492627	0.824389038	0.012698169	0.994889069	FALSE
85	PF3D7_0200100.iso1.exon2.amp1_2746	0.601708699	1.678661033	1.076952335	0.042437217	1.089621295	0.845704953	0.168492677	0.793293038	FALSE
86	PF3D7_0200200.iso1.exon1.amp1_1284	0.728217172	0.727314244	-0.000902928	0.998808057	1.103544689	1.212901799	-0.000134819	0.999164392	FALSE
87	PF3D7_0200400.iso1.exon1.amp1_1275	0.709533118	1.09438706	0.384853942	0.639160353	1.42922603	1.632926564	0.044136547	0.978203774	FALSE
88	PF3D7_0200500.iso1.exon1.amp1_3303	0.619230974	0.447731972	-0.171499002	0.843757165	1.235571488	1.775439501	-0.021875669	0.993519608	FALSE
89	PF3D7_0200600.iso1.exon1.amp1_2442	0.625779994	0.934328598	0.308548603	0.65191231	1.01415321	1.377838071	0.048480165	0.978203774	FALSE
90	PF3D7_0200700.iso1.exon1.amp1_700	-0.177225428	0.024311242	0.201536669	0.716311439	0.831577807	1.12140475	0.03867213	0.978203774	FALSE
91	PF3D7_0200800.iso1.exon3.amp1_406	-0.074408826	0.468271726	0.542680553	0.267143032	0.499640285	0.934104631	0.160176177	0.978054103	FALSE
92	PF3D7_0201000.iso1.exon1.amp1_3595	-0.087676789	0.732292822	0.819969611	0.062843561	0.612531136	0.726668267	0.218225199	0.862760147	FALSE
93	PF3D7_0201200.iso1.exon2.amp1_3603	0.565738937	1.930962736	1.3652238	0.081599213	1.191010792	1.32656952	0.188542075	0.912416971	FALSE
94	PF3D7_0201300.iso1.exon2.amp1_119	1.148992856	1.637641627	0.488648771	0.389511424	1.377439281	1.0537942	0.060536459	0.978054103	FALSE
95	PF3D7_0201500.2o2_5533	-0.559283123	-0.046983882	0.512299241	0.412987244	0.489575945	1.246881956	0.13746492	0.978054103	FALSE
96	PF3D7_0201700.2o2_8813	-0.315163516	0.614999749	0.930163266	0.280297137	0.47181898	1.663405304	0.218085826	0.978054103	FALSE
97	PF3D7_0201800.iso1.exon1.amp1_4451	0.049125278	0.547328056	0.498202779	0.412599637	0.762027712	1.198596946	0.101006308	0.978054103	FALSE
98	PF3D7_0201800.iso1.exon2.amp1_3566	-0.619371007	-0.397911411	0.221459596	0.400386006	0.319249119	0.518501508	0.106343033	0.978054103	FALSE
99	PF3D7_0201900.e2s1_5490	-0.562404724	-0.558312189	0.004092535	0.981597113	0.273319395	0.361044965	0.002398293	0.998284684	FALSE
100	PF3D7_0202000.e2s1_8364	-0.533114571	-0.327732493	0.205382079	0.607904567	0.737203893	0.790313623	0.04605233	0.978203774	FALSE
101	PF3D7_0202300.2o2_8437	-0.711861878	-0.52644103	0.185420848	0.784065372	0.894841854	1.382577608	0.032146471	0.982640702	FALSE
102	PF3D7_0202400.e1s1_5756	-0.515148121	-0.50261577	0.012532351	0.979840905	0.772643239	1.008491261	0.002603487	0.998284684	FALSE
103	PF3D7_0202500.1o1_7250	0.338195223	0.798087207	0.459891984	0.581751418	1.44959274	1.653131583	0.052014666	0.978203774	FALSE
104	PF3D7_0202600.iso2.exon1.amp1_2518	-0.464259152	-0.71275386	-0.248494708	0.133527233	0.577676042	0.260292028	-0.075095814	0.912416971	FALSE
105	PF3D7_0202700.iso1.exon1.amp1_2186	-0.126187379	-0.379051197	-0.252863818	0.039989538	0.403608004	0.185501624	-0.109318221	0.778685174	FALSE
106	PF3D7_0203000.iso1.exon1.amp1_538	-0.517653105	-0.484564746	0.033088359	0.932347789	0.834033385	0.767133846	0.00666942	0.998284684	FALSE
107	PF3D7_0203000.iso1.exon1.amp2_1055	-0.105293095	-0.012648843	0.092644252	0.824051258	0.835466792	0.825224479	0.018506606	0.988297574	FALSE
108	PF3D7_0203100.e1s1_6609	-0.414653713	-0.365101761	0.049551953	0.806524844	0.493943559	0.388363624	0.017086197	0.983296632	FALSE
109	PF3D7_0203100.e2s2_7084	0.430954461	0.789377986	0.358423525	0.364540345	0.852229946	0.743233118	0.071046658	0.978054103	FALSE
110	PF3D7_0203100.e2s3_5060	-0.347437839	-0.252108069	0.09532977	0.854023436	1.114812617	1.017452303	0.014386115	0.993519608	FALSE
111	PF3D7_0203200.1o1_5016	-0.34026081	-0.406470861	-0.066210051	0.83341104	0.725976222	0.611097299	-0.015452487	0.989130662	FALSE
112	PF3D7_0203800.iso1.exon12.amp1_2119	-0.362600761	-0.300576923	0.062023839	0.758627742	0.570312003	0.373512139	0.018729663	0.98162999	FALSE
113	PF3D7_0204100.iso1.exon1.amp1_247	-0.387834737	-0.683736176	-0.295901439	0.109002962	0.755327105	0.258742648	-0.068750364	0.912416971	FALSE
114	PF3D7_0204100.iso1.exon1.amp2_536	-0.312862724	-0.588517998	-0.275655274	0.286777445	0.580898677	0.476096369	-0.080571838	0.978054103	FALSE
115	PF3D7_0204100.iso1.exon1.amp3_476	-0.1024764	-0.093840794	0.008635607	0.98551867	0.495583694	0.985702104	0.002519723	0.998284684	FALSE
116	PF3D7_0204300.1o1_4751	-0.563101321	-0.172837138	0.390264183	0.539001031	0.869595825	1.271268596	0.070477878	0.978054103	FALSE
117	PF3D7_0204500.1o1_5582	-0.273157969	-0.55244492	-0.279286951	0.101342432	0.50120626	0.279053568	-0.09665048	0.912416971	FALSE
118	PF3D7_0204600.iso1.exon1.amp2_seg2_1153	-0.335706045	-0.281956914	0.053749131	0.846151505	0.350009637	0.568545891	0.023540708	0.993519608	FALSE
119	PF3D7_0204800.iso1.exon1.amp1_3895	-0.505922191	-0.444529852	0.061392338	0.85602037	0.554761998	0.684080734	0.01793273	0.993519608	FALSE
120	PF3D7_0206000.s2_8261	0.265134501	0.278625767	0.013491266	0.9703657	0.90407176	0.696444986	0.002545286	0.998284684	FALSE
121	PF3D7_0206100.1o4_7281	-0.823099789	-0.603079707	0.220020082	0.653752216	0.756867596	0.985785141	0.046677487	0.978203774	FALSE
122	PF3D7_0206200.1o1_7052	-0.199485753	-0.06259621	0.136889544	0.798407489	0.772774306	1.090803167	0.028018934	0.982733913	FALSE
123	PF3D7_0206800_8292	0.88583671	1.923442433	1.037605724	0.051083576	1.444846706	0.844904364	0.124321607	0.820283309	FALSE
124	PF3D7_0206900.1.1o2_4674	0.100180506	0.332231968	0.232051462	0.726011809	1.291827879	1.310132192	0.029891032	0.978466981	FALSE
125	PF3D7_0206900.1.2o2_5836	-0.446377303	-0.91450873	-0.468131427	0.079495183	1.001512432	0.393146825	-0.081845253	0.912416971	FALSE
126	PF3D7_0206900.1.e1_8561	-0.486454194	-0.471025863	0.015428331	0.979789171	1.265503134	1.203958148	0.002042708	0.998284684	FALSE
127	PF3D7_0207000.1o2_6703	0.444004665	1.359404647	0.915399982	0.285268181	1.7060419	1.596525251	0.09005111	0.978054103	FALSE
128	PF3D7_0207000.2o2_6414	-0.632697169	0.226255146	0.858952315	0.345919807	0.872849593	1.783420435	0.1410165	0.978054103	FALSE
129	PF3D7_0207000.e1_7116	0.374363625	1.193773049	0.819409424	0.333625398	1.677096736	1.598813733	0.081846982	0.978054103	FALSE
130	PF3D7_0207100.s1_9173	-0.577389919	0.219789549	0.797179468	0.32784801	0.502503397	1.595143247	0.186563501	0.978054103	FALSE
131	PF3D7_0207200_6262	-0.553216403	-0.836337971	-0.283121568	0.025043254	0.53199089	0.161068788	-0.093544822	0.674546004	FALSE
132	PF3D7_0207300.iso1.exon2.amp1_4172	-0.509105303	-0.312708902	0.196396401	0.622999407	0.602319873	0.802056869	0.052150455	0.978203774	FALSE
133	PF3D7_0207300.iso1.exon5.amp1_1780	-0.357253983	-0.60383745	-0.246583467	0.090734505	0.316089777	0.246468817	-0.132945119	0.912416971	FALSE
134	PF3D7_0207400.4o4_5635	-0.488561163	-0.36184672	0.126714443	0.676327727	0.361991229	0.618952152	0.052955999	0.978203774	FALSE
135	PF3D7_0207500.e1s1_8609	0.316723534	0.262945691	-0.053777843	0.919104288	1.070284294	1.049957308	-0.008391945	0.998284684	FALSE
136	PF3D7_0207500.e3s1_8088	0.278940514	0.376314373	0.097373858	0.887833828	0.816700346	1.422379893	0.017947264	0.9967683	FALSE
137	PF3D7_0207600.e2s1_8341	0.180022444	0.503708663	0.323686219	0.668246001	1.016653194	1.53134943	0.049677621	0.978203774	FALSE
138	PF3D7_0207600.e4s1_8076	-0.442852569	-0.885219408	-0.442366839	0.200258335	1.07478123	0.580175413	-0.071469173	0.956958241	FALSE
139	PF3D7_0207700.2o4_5642	0.381971293	1.682258742	1.300287449	0.118301568	1.29054288	1.459133103	0.165387199	0.912416971	FALSE
140	PF3D7_0207700.4o4_8238	-0.589508322	-0.347243601	0.242264721	0.555812407	0.347388856	0.836642213	0.093864333	0.978054103	FALSE
141	PF3D7_0208000.4o4_7083	-0.525850981	-0.384170985	0.141679996	0.574947657	0.481929387	0.49558007	0.048841849	0.978203774	FALSE
142	PF3D7_0208100.iso2.exon10.amp1_1520	-0.050787325	-0.040381793	0.010405532	0.967836958	0.46082618	0.51892935	0.003708537	0.998284684	FALSE
143	PF3D7_0208100.iso2.exon13.amp1_3822	0.093051178	-0.182306243	-0.27535742	0.671025986	0.642215793	1.329120735	-0.061168848	0.978203774	FALSE
144	PF3D7_0208700.iso2.exon4.amp1_1767	-0.456845338	-0.643973956	-0.187128619	0.395250916	0.398151177	0.423730246	-0.077761495	0.978054103	FALSE
145	PF3D7_0208900.e1s3_5063	-0.976961394	-1.058820764	-0.08185937	0.709298636	0.771925315	0.371345148	-0.018481009	0.978203774	FALSE
146	PF3D7_0209100.2o3_8219	-0.368598099	-0.247303768	0.121294331	0.595003221	0.504123627	0.440268018	0.040640047	0.978203774	FALSE
147	PF3D7_0209300.1o2_6694	-0.454076079	-0.213535518	0.240540561	0.507079021	0.366972948	0.730302358	0.094765817	0.978054103	FALSE
148	PF3D7_0209400.2o7_8465	-0.727668898	-1.193418328	-0.46574943	0.007353355	0.733279928	0.20935705	-0.111713628	0.488837897	FALSE
149	PF3D7_0209800.e2_6830	-0.260416635	-0.017914148	0.242502487	0.530206817	0.746860706	0.753316797	0.05406383	0.978054103	FALSE
150	PF3D7_0210200.iso1.exon2.amp2_seg1_2597	2.018582684	2.597203853	0.578621169	0.386965703	1.132818395	1.292004868	0.083742144	0.978054103	FALSE
151	PF3D7_0210300.e2_9137	-0.765748065	-0.244100697	0.521647367	0.233196778	0.560867989	0.821196033	0.146011576	0.956958241	FALSE
152	PF3D7_0210600.3o5_4701	-0.191586152	-0.014217063	0.177369088	0.568327333	0.537410916	0.614982735	0.054085115	0.978054103	FALSE
153	PF3D7_0210700.1o1_6705	-0.302878414	-0.213900266	0.088978148	0.636994295	0.506641528	0.351451083	0.030152537	0.978203774	FALSE
154	PF3D7_0211100.iso1.exon1.amp1_3153	-0.327819166	-0.437025349	-0.109206183	0.761088106	0.861001332	0.690666667	-0.021570952	0.982094362	FALSE
155	PF3D7_0211100.iso1.exon1.amp2_1349	0.055094081	0.118970383	0.063876301	0.858300284	0.824716082	0.695050117	0.013121682	0.993519608	FALSE
156	PF3D7_0211200.1o1_7850	0.250791144	-0.038144922	-0.288936066	0.502628587	0.753796661	0.845531285	-0.062987473	0.978054103	FALSE
157	PF3D7_0211300.iso1.exon2.amp1_77	-0.428010727	-0.482368074	-0.054357347	0.753208769	0.346844768	0.341408104	-0.026165173	0.980535118	FALSE
158	PF3D7_0211900.iso1.exon1.amp1_2450	-0.208133481	0.006777245	0.214910727	0.488063291	0.806337025	0.574768985	0.045687256	0.978054103	FALSE
159	PF3D7_0212200.iso1.exon2.amp1_4153	-0.638200366	0.051804075	0.690004441	0.052562419	0.629022177	0.577916714	0.184428862	0.820283309	FALSE
160	PF3D7_0212300.e3s1_4883	-0.479094001	-0.411606546	0.067487455	0.864465402	0.351635648	0.820808705	0.026167302	0.994491687	FALSE
161	PF3D7_0212400.3o3_6803	-0.595847517	-0.789451676	-0.193604159	0.062883611	0.481100782	0.121209449	-0.070857775	0.862760147	FALSE
162	PF3D7_0212500.iso1.exon1.amp1_3098	-0.838721255	-0.507615328	0.331105927	0.238846225	0.415570448	0.526181436	0.128553769	0.956958241	FALSE
163	PF3D7_0212700.1o1_4996	-0.344407176	-0.321032809	0.023374367	0.908304266	0.786876555	0.322967172	0.005196765	0.998284684	FALSE
164	PF3D7_0212900.1o1_9032	-0.801744533	-0.538941567	0.262802966	0.637913924	0.441602254	1.146910296	0.07748958	0.978203774	FALSE
165	PF3D7_0213000.1o1_4661	-0.757130749	-0.961107754	-0.203977006	0.209754635	0.572406329	0.260560322	-0.062194081	0.956958241	FALSE
166	PF3D7_0213400.iso1.exon2.amp1_388	-0.430091787	-0.609587419	-0.179495632	0.210490453	0.362426509	0.253602072	-0.084988393	0.956958241	FALSE
167	PF3D7_0213400.iso1.exon3.amp1_84	-0.362999473	-0.587196723	-0.224197249	0.050269659	0.540945898	0.126153224	-0.073018049	0.820283309	FALSE
168	PF3D7_0213500.iso1.exon3.amp1_4447	-0.422408422	-0.724965868	-0.302557446	0.181960924	0.556442313	0.398810424	-0.093174922	0.939531746	FALSE
169	PF3D7_0213900.iso1.exon1.amp2_1348	-0.563124081	-0.738136589	-0.175012508	0.190422429	0.55090683	0.19076405	-0.055742375	0.941095042	FALSE
170	PF3D7_0214100.e1s1_6246	0.151736411	0.679249169	0.527512758	0.222446059	0.677676865	0.802340561	0.126933379	0.956958241	FALSE
171	PF3D7_0214300.iso1.exon1.amp1_2559	-0.206986279	0.152435113	0.359421392	0.063318425	0.751699121	0.275702285	0.083823129	0.862760147	FALSE
172	PF3D7_0214300.iso1.exon1.amp2_2848	-0.58954828	-0.675792618	-0.086244338	0.63193479	0.550101127	0.322941675	-0.02713653	0.978203774	FALSE
173	PF3D7_0215700.e2s2_6920	0.420441811	0.343980858	-0.076460953	0.887222339	0.78539987	1.099702467	-0.015423329	0.9967683	FALSE
174	PF3D7_0216400.1o1_7065	-0.615706654	-0.761059215	-0.145352561	0.600980896	0.639811843	0.53311724	-0.038523289	0.978203774	FALSE
175	PF3D7_0216700.1.6o7_7390	-0.438027959	-0.477307075	-0.039279116	0.859670153	0.715269764	0.393870687	-0.009528804	0.993519608	FALSE
176	PF3D7_0216700.iso2.exon6.amp1_679	0.210585439	0.163313847	-0.047271593	0.90611114	1.012113536	0.765796488	-0.007976043	0.998284684	FALSE
177	PF3D7_0216900.1o1_7051	-0.198234123	0.058182989	0.256417113	0.685401321	0.547317557	1.303011896	0.063361814	0.978203774	FALSE
178	PF3D7_0217400.2o2_6962	0.29036805	0.181306146	-0.109061905	0.860671719	0.857275701	1.270455966	-0.019920614	0.993519608	FALSE
179	PF3D7_0217700.iso1.exon1.amp1_3848	0.042738983	0.351376612	0.308637629	0.150210679	0.804998007	0.325964897	0.067092426	0.916954512	FALSE
180	PF3D7_0217900.e1s1_7766	0.192468337	0.433090304	0.240621967	0.274160695	0.854187363	0.336032105	0.04932267	0.978054103	FALSE
181	PF3D7_0218300.1o4_6226	-0.600570586	-0.772173914	-0.171603329	0.135389544	0.379378331	0.184942497	-0.078799173	0.912577601	FALSE
182	PF3D7_0218300.2o4_6804	-0.602822564	-0.941578865	-0.338756301	0.023885984	0.470940676	0.222055057	-0.125427815	0.66976299	FALSE
183	PF3D7_0218300.e2_6243	-0.435609156	-0.869401765	-0.433792609	0.001036848	0.676254124	0.064652465	-0.113331146	0.241372595	FALSE
184	PF3D7_0219300.1o1_5228	-0.19842536	-0.113301972	0.085123388	0.706032708	0.695744442	0.405026566	0.021184336	0.978203774	FALSE
185	PF3D7_0219400.iso1.exon2.amp1_1777	-1.424904768	-1.50869985	-0.083795082	0.711250593	1.229410685	0.152194429	-0.012037353	0.978203774	FALSE
186	PF3D7_0219600.e1s1_8817	-0.145759505	0.404728543	0.550488047	0.217684432	0.803311153	0.821129543	0.113928745	0.956958241	FALSE
187	PF3D7_0219700.2o2_6131	0.628638235	1.342077378	0.713439143	0.260206165	1.032623639	1.189397207	0.113115231	0.976799056	FALSE
188	PF3D7_0219900.2o2_6693	0.001620582	0.637961941	0.636341359	0.39659248	0.903688853	1.47716295	0.107775615	0.978054103	FALSE
189	PF3D7_0220000.e2s1_7105	1.621154969	2.214860834	0.593705865	0.542697801	1.643405801	1.927962944	0.058990377	0.978054103	FALSE
190	PF3D7_0220000.e2s2_7394	0.813996626	2.095353524	1.281356899	0.104146494	1.443180099	1.359757914	0.14891008	0.912416971	FALSE
191	PF3D7_0220100.e2s1_7661	0.195120564	-0.200997658	-0.396118221	0.339691243	0.853023449	0.780586698	-0.078103806	0.978054103	FALSE
192	PF3D7_0220600.2o2_6976	-0.034302112	-0.090715251	-0.056413139	0.9282944	0.912413825	1.279681204	-0.009792073	0.998284684	FALSE
193	PF3D7_0221400.iso1.exon2.amp1_3871	-0.274347358	-0.730388385	-0.456041027	0.165060691	1.000895289	0.549071714	-0.079071799	0.924994436	FALSE
194	PF3D7_0221600.1o1_5812	0.224092853	-0.110626809	-0.334719662	0.560644305	1.142286876	1.121906904	-0.048933888	0.978054103	FALSE
195	PF3D7_0222000.iso1.exon1.amp1_691	-0.530548202	-0.792151473	-0.261603271	0.165893953	0.707850881	0.288496132	-0.06466418	0.924994436	FALSE
196	PF3D7_0222100.iso1.exon1.amp1_3007	0.60013201	0.775279959	0.175147949	0.761562961	1.150534701	1.141218666	0.025394729	0.98225508	FALSE
197	PF3D7_0222500.iso1.exon2.amp1_987	0.364158205	0.250088033	-0.114070171	0.79823705	1.003637593	0.86886713	-0.019212079	0.982733913	FALSE
198	PF3D7_0222600.iso1.exon2.amp1_1008	0.136587309	0.575570413	0.438983104	0.639390385	1.104705064	1.905754236	0.059971969	0.978203774	FALSE
199	PF3D7_0222700.iso1.exon2.amp1_1289	0.017197666	0.356315004	0.339117339	0.418074469	0.897073016	0.795212686	0.063767824	0.978054103	FALSE
200	PF3D7_0222800.iso1.exon2.amp1_1564	0.418433127	0.56039361	0.141960483	0.855658886	1.42658343	1.562855548	0.01640372	0.993519608	FALSE
201	PF3D7_0222900.1o1_4649	-0.046708846	0.554172971	0.600881817	0.200882477	0.882929587	0.855657376	0.113810994	0.956958241	FALSE
202	PF3D7_0223100.iso1.exon2.amp1_989	-0.119043997	0.000540694	0.119584692	0.805629208	0.874910492	0.973080854	0.022486219	0.983296632	FALSE
203	PF3D7_0223200.iso1.exon2.amp1_3607	0.158743144	1.027263089	0.868519945	0.13208846	0.80838531	1.02361042	0.173348327	0.912416971	FALSE
204	PF3D7_0223300 (renamed)_6619	0.653332597	1.225895541	0.572562944	0.372231809	0.932705862	1.247062006	0.09810902	0.978054103	FALSE
205	PF3D7_0223300.iso1.exon2.amp1_3611	1.07146449	1.752242195	0.680777705	0.243253143	0.926973868	1.09029621	0.119874625	0.959883446	FALSE
206	PF3D7_0223400.iso1.exon2.amp1_1856	-0.290845165	0.037941195	0.32878636	0.474762566	0.70981864	0.907007933	0.07462092	0.978054103	FALSE
207	PF3D7_0223500.iso1.exon1.amp1_3027	-0.057087156	0.605350609	0.662437765	0.362414084	0.963511338	1.416269144	0.10784455	0.978054103	FALSE
208	PF3D7_0223500.iso1.exon2.amp1_4551	-0.40850556	-0.480002468	-0.071496909	0.755494066	0.602968846	0.433004246	-0.020316659	0.980535118	FALSE
209	PF3D7_0300100.iso1.exon2.amp1_138	1.33357372	2.347779315	1.014205594	0.104362763	1.251044376	1.07288184	0.137145143	0.912416971	FALSE
210	PF3D7_0300200.iso1.exon1.amp1_3012	0.66346955	1.242716563	0.579247013	0.350947205	1.122614222	1.185276191	0.085453696	0.978054103	FALSE
211	PF3D7_0300400.iso1.exon1.amp1_401	0.957596393	1.183603394	0.226007001	0.77622634	1.414321714	1.591967405	0.026246683	0.982640702	FALSE
212	PF3D7_0300500.iso1.exon1.amp1_134	-0.107594087	-0.100819189	0.006774898	0.985010751	0.742243251	0.71379492	0.001527661	0.998284684	FALSE
213	PF3D7_0300700.iso1.exon2.amp1_3592	1.042250409	1.153057807	0.110807398	0.863373909	0.932133058	1.313148321	0.018810296	0.994491687	FALSE
214	PF3D7_0300800.iso1.exon2.amp1_1572	-0.506166399	-0.066944778	0.439221622	0.427756835	0.626523201	1.098407832	0.105334677	0.978054103	FALSE
215	PF3D7_0300900.iso1.exon2.amp1_1555	-0.53046133	-0.401796785	0.128664544	0.370215678	0.36329818	0.263587788	0.060643263	0.978054103	FALSE
216	PF3D7_0301100.2o2_9008	-0.417097507	-0.817686064	-0.400588557	0.072511661	0.665375619	0.356467778	-0.104568905	0.879108576	FALSE
217	PF3D7_0301200.iso1.exon3.amp1_short_4317	-0.426985259	-0.778754666	-0.351769408	0.086065301	0.508988175	0.341105292	-0.118881606	0.912416971	FALSE
218	PF3D7_0301300.2o2_5567	-0.637628702	-0.526897772	0.110730931	0.738738266	0.637970598	0.658413824	0.028823826	0.980535118	FALSE
219	PF3D7_0301400.2o2_4671	-0.557968615	-0.202869382	0.355099233	0.273003233	0.608897389	0.604708015	0.097271472	0.978054103	FALSE
220	PF3D7_0301500.2o2_6419	-0.534465606	-0.585875245	-0.051409638	0.813139924	0.457073411	0.427970208	-0.018875681	0.985244983	FALSE
221	PF3D7_0301700.e1s1_8026	-0.281843334	-0.634414761	-0.352571426	0.323136139	0.77383456	0.664933337	-0.077064502	0.978054103	FALSE
222	PF3D7_0301700.e2s1_8045	0.281696829	0.456903872	0.175207043	0.713096255	1.143727987	0.914004361	0.026060114	0.978203774	FALSE
223	PF3D7_0301800.2o2_9014	-0.355541427	-0.546700868	-0.191159441	0.442017867	0.823409243	0.425470663	-0.040371613	0.978054103	FALSE
224	PF3D7_0301900.1o1_7888	-0.166434069	0.93835702	1.10479109	0.160557608	0.793390896	1.431039113	0.207549819	0.916954512	FALSE
225	PF3D7_0302000.iso1.exon2.amp1_158	-0.216855008	0.169725354	0.386580362	0.247088771	0.50258302	0.626568077	0.124423862	0.964953921	FALSE
226	PF3D7_0302200.1o9_6523	0.122455645	1.050528432	0.928072787	0.160256138	0.632336319	1.201574922	0.215363712	0.916954512	FALSE
227	PF3D7_0302200.9o9_6812	-0.311058156	-0.426307517	-0.115249362	0.516862158	0.374888823	0.342709269	-0.051711333	0.978054103	FALSE
228	PF3D7_0302200.e1_5952	0.623006381	1.778728869	1.155722488	0.14742076	0.803886118	1.437268143	0.214825686	0.916954512	FALSE
229	PF3D7_0302200.e2_6826	-0.501617799	-0.63782047	-0.136202671	0.395651844	0.322837379	0.305588514	-0.070725253	0.978054103	FALSE
230	PF3D7_0302200.e8_5663	-0.743715403	-0.855361583	-0.111646179	0.319388621	0.446214325	0.168971298	-0.043839699	0.978054103	FALSE
231	PF3D7_0302200.e9_5390	-0.33236049	-0.452713835	-0.120353345	0.613918628	0.639578448	0.444235476	-0.032305322	0.978203774	FALSE
232	PF3D7_0302500.e1s1_7185	0.985423389	1.223511581	0.238088192	0.64209027	1.001702168	1.00784399	0.039586893	0.978203774	FALSE
233	PF3D7_0302500.e6s1_5136	-0.621118994	-0.859416149	-0.238297155	0.191439415	0.633542049	0.292781535	-0.065621701	0.94174758	FALSE
234	PF3D7_0302500.e9s1_6314	0.181114208	0.30682482	0.125710612	0.797568962	0.717287858	0.996572962	0.027807802	0.982733913	FALSE
235	PF3D7_0302800.e1s1_6041	0.299855407	0.125869374	-0.173986033	0.755563976	0.83718856	1.13260079	-0.033142032	0.980535118	FALSE
236	PF3D7_0302900.e1s1_5473	-0.261036622	-0.405164187	-0.144127565	0.572432763	0.912879926	0.424729166	-0.027539799	0.978054103	FALSE
237	PF3D7_0302900.e1s2_5184	-0.224982456	-0.191694597	0.033287859	0.959391708	1.098661149	1.32159606	0.004928844	0.998284684	FALSE
238	PF3D7_0303200.e2s1_6620	-0.539849446	-0.326527806	0.21332164	0.53176393	0.454743143	0.68292355	0.073242599	0.978054103	FALSE
239	PF3D7_0303700.e1s1_6024	0.126540442	0.777325659	0.650785217	0.360415391	0.772180171	1.393605916	0.125595506	0.978054103	FALSE
240	PF3D7_0303800.1o1_7036	-0.67362894	0.251692173	0.925321114	0.109664459	0.342760947	1.009840099	0.330500699	0.912416971	FALSE
241	PF3D7_0304000.e4s1_5769	0.079335234	0.196547932	0.117212697	0.880775031	0.918637448	1.610224779	0.019172497	0.996647775	FALSE
242	PF3D7_0304100.1o1_7041	-0.501229522	-0.435152394	0.066077128	0.775592136	0.342333502	0.470610775	0.030688604	0.982640702	FALSE
243	PF3D7_0304200.e1s1_8348	-0.091732476	-0.124362863	-0.032630387	0.931914902	0.507559642	0.783554647	-0.009975601	0.998284684	FALSE
244	PF3D7_0304600_7131	-0.733623893	-0.552747649	0.180876244	0.553494076	0.271261094	0.620249213	0.091666915	0.978054103	FALSE
245	PF3D7_0305100.e1s3_8820	-0.773912193	-0.715451012	0.058461181	0.83391015	0.654300548	0.539581211	0.015163466	0.989130662	FALSE
246	PF3D7_0305200.iso1.exon1.amp1_3725	-0.287205519	-0.490681065	-0.203475546	0.662617502	0.755299493	0.934762617	-0.043629337	0.978203774	FALSE
247	PF3D7_0305200.iso1.exon1.amp2_4239	-0.216094915	-0.16538683	0.050708085	0.922477646	0.83577313	1.056767117	0.009791548	0.998284684	FALSE
248	PF3D7_0305500.e1s3_9107	-0.132637463	-0.555776721	-0.423139258	0.502875523	1.06401416	1.242645123	-0.064979491	0.978054103	FALSE
249	PF3D7_0305600.1o1_7038	-0.079753394	-0.308232055	-0.228478661	0.596219417	0.778884418	0.852022246	-0.048364705	0.978203774	FALSE
250	PF3D7_0306200.5o5_6140	0.154907582	0.552821274	0.397913693	0.565645689	1.037062079	1.383589081	0.061345978	0.978054103	FALSE
251	PF3D7_0307300.1o1_7034	-0.450117715	-0.075737876	0.374379839	0.58985052	0.288451727	1.427626187	0.113841092	0.978203774	FALSE
252	PF3D7_0307500.iso1.exon4.amp1_417	0.418334833	1.200410469	0.782075636	0.195737738	0.922342688	1.110346115	0.137920442	0.952862184	FALSE
253	PF3D7_0307700.e3s2_7088	0.025007636	0.009613461	-0.015394174	0.979030443	0.837151356	1.197402546	-0.002900876	0.998284684	FALSE
254	PF3D7_0308000.1o1_8767	0.244965763	0.107062263	-0.1379035	0.848469382	0.862602484	1.484821791	-0.024141846	0.993519608	FALSE
255	PF3D7_0308100.iso1.exon1.amp2_3062	-0.616192782	-0.467473198	0.148719584	0.465244968	0.48022024	0.383825863	0.052682959	0.978054103	FALSE
256	PF3D7_0308300.e1s1_6328	-0.525047449	-0.435738062	0.089309387	0.498533955	0.464011096	0.22039799	0.033554802	0.978054103	FALSE
257	PF3D7_0308700.iso1.exon1.amp1_2745	0.736852093	0.336687688	-0.400164405	0.565224781	1.364007107	1.359651331	-0.04891302	0.978054103	FALSE
258	PF3D7_0308900.iso1.exon1.amp2_1908	-0.734613421	-0.664763543	0.069849878	0.826126986	0.274762731	0.65967137	0.034261173	0.989130662	FALSE
259	PF3D7_0309000.iso1.exon1.amp1_144	0.111769274	0.387537464	0.27576819	0.320854493	0.681945496	0.508144445	0.069127141	0.978054103	FALSE
260	PF3D7_0309100.iso1.exon5.amp1_2930	-0.350482695	-0.278738052	0.071744643	0.724977679	0.365316325	0.406990054	0.032301824	0.978466981	FALSE
261	PF3D7_0309200.iso1.exon3.amp2_2542	-0.550649855	-0.643195562	-0.092545707	0.696452765	0.350414826	0.479516942	-0.042026985	0.978203774	FALSE
262	PF3D7_0309600.e1s1_5717	-0.690743204	-0.328817353	0.361925851	0.498838567	0.567166341	1.075325627	0.093702235	0.978054103	FALSE
263	PF3D7_0309900.iso1.exon2.amp1_655	-0.479731243	-0.576487256	-0.096756013	0.669440014	0.439863789	0.447136248	-0.036593637	0.978203774	FALSE
264	PF3D7_0310200.e1s3_7089	-0.576528935	-0.33598167	0.240547265	0.49710648	1.009107268	0.642875191	0.041109478	0.978054103	FALSE
265	PF3D7_0310300.e1s1_6333	-0.295452564	-0.368771153	-0.073318589	0.629384372	0.573326188	0.244845929	-0.022353341	0.978203774	FALSE
266	PF3D7_0310300.e1s2_6327	0.038541566	0.633346374	0.594804808	0.235244497	0.791511005	0.934092277	0.122600345	0.956958241	FALSE
267	PF3D7_0310500.e1s1_7495	-0.455613502	-0.447773527	0.007839975	0.97957266	0.706743023	0.595707129	0.001879328	0.998284684	FALSE
268	PF3D7_0310500.e1s2_7206	0.63098596	0.318751807	-0.312234153	0.651728585	1.308593724	1.366818835	-0.039567672	0.978203774	FALSE
269	PF3D7_0310500.e1s3_8946	-0.327623036	0.42648911	0.754112146	0.153011549	0.738686357	0.949971477	0.164283964	0.916954512	FALSE
270	PF3D7_0310700.2o2_7252	-0.696277463	-0.340329796	0.355947668	0.163445858	0.617117798	0.446913293	0.098776744	0.923996344	FALSE
271	PF3D7_0310800.1o1_6383	-0.840154096	-0.979359355	-0.139205259	0.422503175	0.485973558	0.313785798	-0.049366995	0.978054103	FALSE
272	PF3D7_0310800_9158	-0.14155617	-0.036851307	0.104704863	0.791805404	1.047770491	0.748054975	0.017128249	0.982733913	FALSE
273	PF3D7_0311100.iso1.exon3.amp1_1794	0.074474063	-0.385275309	-0.459749372	0.213011729	0.961099803	0.650356293	-0.082241594	0.956958241	FALSE
274	PF3D7_0311400.iso1.exon1.amp1_2120	-0.064174135	-0.256034502	-0.191860366	0.684132595	0.912656579	0.931607491	-0.034955586	0.978203774	FALSE
275	PF3D7_0311400.iso1.exon2.amp1_782	0.506814276	0.621902719	0.115088443	0.848921972	1.153646383	1.204180581	0.01654468	0.993519608	FALSE
276	PF3D7_0311400.iso1.exon2.amp2_1071	0.227568774	-0.320785644	-0.548354418	0.152959059	1.001681548	0.660524182	-0.094246134	0.916954512	FALSE
277	PF3D7_0311600.2o5_9087	-0.471068754	-0.747659198	-0.276590444	0.250436405	0.52677679	0.439823195	-0.089021108	0.968457025	FALSE
278	PF3D7_0311700.1o15_9041	-0.13539079	-0.20849738	-0.07310659	0.77227781	0.572564676	0.490774486	-0.021601195	0.982640702	FALSE
279	PF3D7_0311800.e3_7124	-0.353349542	-0.362202651	-0.008853109	0.960492712	0.438535931	0.343740561	-0.003439126	0.998284684	FALSE
280	PF3D7_0311900.1o1_5052	-0.561170181	-0.862212302	-0.301042121	0.227794416	0.574879192	0.450215695	-0.089214481	0.956958241	FALSE
281	PF3D7_0312200.iso1.exon1.amp1_3720	-0.666185294	-0.931628811	-0.265443517	0.07812104	0.75287129	0.144258533	-0.062184495	0.912416971	FALSE
282	PF3D7_0312300.1o1_7872	-0.603423812	-0.292931201	0.310492611	0.567581427	0.564136255	1.101541693	0.080068645	0.978054103	FALSE
283	PF3D7_0312400.2o7_8753	0.361977578	0.317382336	-0.044595242	0.9380694	0.841884788	1.1712788	-0.008402506	0.998284684	FALSE
284	PF3D7_0313000.1o2_7579	-0.061902488	-0.084368755	-0.022466267	0.952055772	0.991260701	0.706251535	-0.00388516	0.998284684	FALSE
285	PF3D7_0313100.1o4_8505	-0.198661779	-0.601863238	-0.403201459	0.115970504	0.683389506	0.431812286	-0.101789584	0.912416971	FALSE
286	PF3D7_0313200.1o1_9000	-0.110608889	-0.286182293	-0.175573405	0.556239358	0.664434069	0.573081452	-0.044681078	0.978054103	FALSE
287	PF3D7_0313300.iso1.exon5.amp1_931	-0.465313044	-0.792445287	-0.327132243	0.024785354	0.636665015	0.17784085	-0.090391947	0.674546004	FALSE
288	PF3D7_0313400.iso1.exon1.amp1_445	-0.489773216	-0.241215781	0.248557435	0.365115809	0.744341177	0.496033799	0.057457681	0.978054103	FALSE
289	PF3D7_0313600.5o6_7614	-0.548952296	-0.379433412	0.169518884	0.528523181	0.676730875	0.504393782	0.042820195	0.978054103	FALSE
290	PF3D7_0313700.iso1.exon2.amp1_2360	-0.179956683	-0.358099397	-0.178142714	0.541433853	0.669712816	0.556894766	-0.045113135	0.978054103	FALSE
291	PF3D7_0313800.5o5_7343	-0.007501179	-0.362872734	-0.355371556	0.279392829	0.774764433	0.599228296	-0.078213057	0.978054103	FALSE
292	PF3D7_0315100.e1s1_7183	-0.692238248	-0.549140367	0.143097882	0.816862018	0.781157413	1.266887289	0.028092649	0.986001333	FALSE
293	PF3D7_0315200.iso1.exon1.amp3_2789	-0.271550524	-0.334691579	-0.063141055	0.777410945	0.476219579	0.438047034	-0.022289402	0.982640702	FALSE
294	PF3D7_0315400.1o1_8147	1.509977618	1.204872478	-0.30510514	0.383618789	0.918849534	0.639494052	-0.056998724	0.978054103	FALSE
295	PF3D7_0315900.2o2_5837	-0.326111861	-0.583410456	-0.257298595	0.475476495	0.6080461	0.706803439	-0.069188976	0.978054103	FALSE
296	PF3D7_0316300.1.e3_6827	-0.468362034	-0.375739737	0.092622297	0.85186283	1.071534994	0.973339907	0.014548524	0.993519608	FALSE
297	PF3D7_0316500.e1s1_5735	0.419236139	0.243648642	-0.175587498	0.590453927	0.697737429	0.632225101	-0.042365458	0.978203774	FALSE
298	PF3D7_0317200.iso1.exon1.amp1_4590	-0.537750825	-0.598665896	-0.060915071	0.722831135	0.443347989	0.324726643	-0.023513151	0.978466981	FALSE
299	PF3D7_0317200.iso1.exon1.amp2_3936	-0.44176871	-0.600311848	-0.158543138	0.373115629	0.521882393	0.31560549	-0.052516195	0.978054103	FALSE
300	PF3D7_0317300.s2_8011	-0.132342562	-0.3220125	-0.189669938	0.678271361	0.733854989	0.918076154	-0.041784376	0.978203774	FALSE
301	PF3D7_0317300.s3_7150	0.813129411	1.233833741	0.42070433	0.121363363	0.594873843	0.469511379	0.120418875	0.912416971	FALSE
302	PF3D7_0317400.iso1.exon1.amp1_643	-0.307759139	0.051311483	0.359070621	0.405735131	0.427755618	0.855841529	0.121145598	0.978054103	FALSE
303	PF3D7_0317400.iso1.exon2.amp1_3902	-0.453867485	-0.269677749	0.184189736	0.684702843	0.657918178	0.917150665	0.044391364	0.978203774	FALSE
304	PF3D7_0317500.iso1.exon1.amp1_3396	0.052468662	0.094975606	0.042506944	0.929286213	0.872621105	0.960963668	0.008024355	0.998284684	FALSE
305	PF3D7_0317500.iso1.exon2.amp1_942	-0.275293504	-0.469333449	-0.194039945	0.136524015	0.500023196	0.194265381	-0.067962147	0.916954512	FALSE
306	PF3D7_0317700.e1s1_8247	-0.631679338	-0.703821515	-0.072142177	0.797971475	0.647907911	0.54678725	-0.018861738	0.982733913	FALSE
307	PF3D7_0317700.e9s1_9185	-0.208579329	-0.539838048	-0.331258719	0.062725211	0.606329446	0.271272634	-0.095393171	0.862760147	FALSE
308	PF3D7_0317800.1o1_7265	-0.84809307	-0.456713783	0.391379287	0.234179343	0.676309471	0.602160599	0.097579845	0.956958241	FALSE
309	PF3D7_0318200.e1s1_8532	-0.776039502	-0.375516547	0.400522955	0.406888428	0.721333146	0.943575211	0.089089556	0.978054103	FALSE
310	PF3D7_0318200.e1s2_8534	-0.303672114	-0.471343044	-0.167670931	0.61508021	0.858656605	0.626802633	-0.033424172	0.978203774	FALSE
311	PF3D7_0318200.e1s3_5066	0.374237953	1.421431265	1.047193313	0.083213579	0.887306305	1.025032563	0.193142158	0.912416971	FALSE
312	PF3D7_0318500.iso1.exon1.amp3_2251	0.220928973	0.325600398	0.104671424	0.861595493	0.846941619	1.226083676	0.019448048	0.993519608	FALSE
313	PF3D7_0318500.iso1.exon1.amp4_222	-0.364408129	-0.531431565	-0.167023436	0.265298884	0.655989715	0.20273796	-0.044743311	0.978054103	FALSE
314	PF3D7_0318500.iso1.exon1.amp5_162	-0.455683342	-0.179013042	0.2766703	0.296313812	0.449855842	0.501331344	0.101152693	0.978054103	FALSE
315	PF3D7_0318600.iso1.exon1.amp1_836	-0.30175137	0.101040465	0.402791834	0.422381513	0.873091806	0.974016441	0.075866113	0.978054103	FALSE
316	PF3D7_0318600.iso1.exon1.amp2_200	-0.387831124	-0.621343881	-0.233512757	0.480645844	0.689068801	0.636502814	-0.056946456	0.978054103	FALSE
317	PF3D7_0319000.iso1.exon1.amp1_3432	-0.296660421	-0.156552066	0.140108355	0.782287549	0.947648747	1.010500368	0.024455905	0.982640702	FALSE
318	PF3D7_0319100.1o1_7545	-0.610142506	-0.545371198	0.064771308	0.84252334	0.564615459	0.655940872	0.01875867	0.993519608	FALSE
319	PF3D7_0319700.e1s1_5124	-0.065843095	-0.202539796	-0.136696701	0.760151997	0.697343969	0.905343067	-0.031493408	0.982094362	FALSE
320	PF3D7_0319900.1o1_4676	-0.065604995	-0.050700343	0.014904653	0.977304677	0.678314616	1.076653201	0.003387397	0.998284684	FALSE
321	PF3D7_0320200.iso1.exon1.amp1_3627	0.025748985	0.239350374	0.213601389	0.722288588	0.931848534	1.213068681	0.036809733	0.978466981	FALSE
322	PF3D7_0320400.e1s3_6638	-0.533127633	-0.401441271	0.131686362	0.411270668	0.663330098	0.235204966	0.034821698	0.978054103	FALSE
323	PF3D7_0320500.1o1_8174	0.21430625	-0.039381011	-0.253687261	0.693256823	0.877354744	1.305456528	-0.045237215	0.978203774	FALSE
324	PF3D7_0320800.e1s1_8898	-0.170550276	0.234652632	0.405202908	0.561065195	0.725287953	1.412594413	0.081342015	0.978054103	FALSE
325	PF3D7_0320800.e2s1_4867	-0.291916737	-0.690789956	-0.398873219	0.095545811	0.6075204	0.400253323	-0.113038325	0.912416971	FALSE
326	PF3D7_0321500.iso1.exon1.amp1_841	-0.563156904	-0.830194768	-0.267037864	0.034375116	0.372415017	0.193169373	-0.124677485	0.733931777	FALSE
327	PF3D7_0321600.e1_7117	-0.627309661	-0.493104918	0.134204742	0.638657599	0.611389116	0.555910678	0.036941943	0.978203774	FALSE
328	PF3D7_0321800.iso1.exon1.amp1_234	-0.195830006	-0.487492402	-0.291662395	0.094408419	0.622749295	0.266080258	-0.081863946	0.912416971	FALSE
329	PF3D7_0322100.1o1_9067	0.072127662	-0.105080771	-0.177208434	0.703138471	0.803692428	0.929812793	-0.036076671	0.978203774	FALSE
330	PF3D7_0322900.e2_5953	-0.464981665	0.052611362	0.517593027	0.324426368	0.370478739	1.026298442	0.176443419	0.978054103	FALSE
331	PF3D7_0323300.1o1_6145	-0.579712143	-0.638039935	-0.058327792	0.716526299	0.684436125	0.232286682	-0.014957654	0.978203774	FALSE
332	PF3D7_0323600.e1_5672	-0.510962615	-0.605997164	-0.095034549	0.68584416	0.631644062	0.439127463	-0.025828319	0.978203774	FALSE
333	PF3D7_0323800.e2s1_7381	-0.018997748	-0.37796296	-0.358965212	0.497017241	0.964785159	1.032272328	-0.061518366	0.978054103	FALSE
334	PF3D7_0324100.2o2_5248	-0.118317568	0.197166556	0.315484124	0.498679758	0.893380907	0.90674184	0.058757558	0.978054103	FALSE
335	PF3D7_0324400.iso1.exon2.amp1_1578	0.067869405	0.039404736	-0.028464669	0.958453785	1.033347075	1.092348256	-0.004561347	0.998284684	FALSE
336	PF3D7_0324600.iso1.exon2.amp1_3003	0.663275595	1.1869828	0.523707205	0.518285134	1.502730839	1.585250853	0.057723204	0.978054103	FALSE
337	PF3D7_0324800.iso1.exon2.amp1_2158	0.367369019	0.509413644	0.142044625	0.852596004	0.994960222	1.567228581	0.022048782	0.993519608	FALSE
338	PF3D7_0324900.iso1.exon1.amp1_2456	0.818015046	1.448868395	0.630853349	0.306403393	1.169723849	1.160758107	0.08996272	0.978054103	FALSE
339	PF3D7_0324900.iso1.exon2.amp1_2239	-0.166658724	0.329219048	0.495877772	0.41370251	0.471258095	1.209045254	0.137776488	0.978054103	FALSE
340	PF3D7_0400100.iso1.exon1.amp1_3682	-0.610706868	0.157522588	0.768229457	0.29326196	0.524583016	1.414777996	0.187359764	0.978054103	FALSE
341	PF3D7_0400100.iso1.exon1.amp2_3971	-0.502830307	0.090643799	0.593474105	0.415376235	0.682062356	1.448357583	0.123007678	0.978054103	FALSE
342	PF3D7_0400100.iso1.exon1.amp3_4260	-0.501740796	-0.667658584	-0.165917788	0.409691076	0.515914953	0.370724439	-0.055100816	0.978054103	FALSE
343	PF3D7_0400100.iso1.exon2.amp1_4192	0.21736638	1.002668043	0.785301663	0.402636238	1.231878415	1.842882983	0.099616468	0.978054103	FALSE
344	PF3D7_0400200.iso1.exon1.amp1_1876	1.137800542	1.918136045	0.780335502	0.349573402	1.272676797	1.609405303	0.098950138	0.978054103	FALSE
345	PF3D7_0400300.iso1.exon1.amp1_2731	-0.099674942	0.066350291	0.166025233	0.80981081	0.948650871	1.408299632	0.027394045	0.984696232	FALSE
346	PF3D7_0400400.iso1.exon1.amp1_1294	0.818631592	0.75915224	-0.059479351	0.918964786	0.969980002	1.182512134	-0.009954665	0.998284684	FALSE
347	PF3D7_0400500.iso1.exon2.amp1_998	0.189662519	0.613994772	0.424332253	0.537832553	1.046010582	1.370398791	0.065070926	0.978054103	FALSE
348	PF3D7_0400700.iso1.exon1.amp1_992	0.007537879	0.141621903	0.134084024	0.821512305	0.978350965	1.199946444	0.022227586	0.98765431	FALSE
349	PF3D7_0400800.iso1.exon1.amp1_3008	1.11539072	1.718783615	0.603392896	0.41939886	1.415350631	1.43856489	0.070923213	0.978054103	FALSE
350	PF3D7_0400900.iso1.exon1.amp1_1573	0.19611463	0.409441136	0.213326506	0.739513273	0.901873016	1.303922347	0.037232052	0.980535118	FALSE
351	PF3D7_0401000.iso1.exon1.amp1_2432	1.575323677	2.429900266	0.854576589	0.323375658	1.133083623	1.670117651	0.11823446	0.978054103	FALSE
352	PF3D7_0401200.iso1.exon2.amp1_2164	0.220193354	0.811637557	0.591444203	0.349112657	0.838366309	1.226212347	0.110776291	0.978054103	FALSE
353	PF3D7_0401300.iso1.exon2.amp1_3599	-0.053906523	0.253308339	0.307214862	0.544085405	0.652014378	1.016802433	0.072941018	0.978054103	FALSE
354	PF3D7_0401400.iso1.exon2.amp1_1862	0.27346576	0.536291013	0.262825253	0.72370916	0.822014181	1.525018793	0.047261738	0.978466981	FALSE
355	PF3D7_0401600.iso2.exon3.amp1_3896	-0.393444823	-0.568618535	-0.175173712	0.33889797	0.545704535	0.321486659	-0.05555389	0.978054103	FALSE
356	PF3D7_0401900.1o1_7666	0.310038708	0.700812663	0.390773954	0.466285871	1.24706924	1.013361892	0.053240034	0.978054103	FALSE
357	PF3D7_0402000 (renamed)_9038	-0.22883052	0.114191694	0.343022214	0.532033784	0.660873497	1.103434401	0.079014746	0.978054103	FALSE
358	PF3D7_0402000.e1s1_9149	-0.400508427	-0.748629045	-0.348120618	0.008869736	0.392263498	0.188386565	-0.154669584	0.488837897	FALSE
359	PF3D7_0402100.e2s1_6909	-0.444756925	-0.162617435	0.28213949	0.392108978	0.323016595	0.651675228	0.125704932	0.978054103	FALSE
360	PF3D7_0402200 (renamed)_8951	-0.314993893	0.719738234	1.034732127	0.223400465	1.112334574	1.587795816	0.146807286	0.956958241	FALSE
361	PF3D7_0402400.2o2_4672	0.245377641	1.86195101	1.61657337	0.048799763	1.076717372	1.316729455	0.243615283	0.820283309	FALSE
362	PF3D7_0402600.iso1.exon1.amp1_4449	0.313558625	0.403550184	0.089991558	0.857521855	1.129764199	0.977443498	0.013465314	0.993519608	FALSE
363	PF3D7_0403500.1o1_6443	-0.426562482	-0.441540961	-0.014978479	0.97754916	0.875703587	1.077901254	-0.002772514	0.998284684	FALSE
364	PF3D7_0403900.iso1.exon1.amp1_1235	-0.36263637	-0.659526668	-0.296890298	0.066733905	0.429264294	0.26270276	-0.119498149	0.865570079	FALSE
365	PF3D7_0404100.iso1.exon1.amp1_2815	-0.667526607	-0.622007784	0.045518823	0.906343756	0.627938078	0.783730022	0.011723742	0.998284684	FALSE
366	PF3D7_0404100.iso1.exon2.amp1_674	-0.292927434	-0.351413572	-0.058486138	0.659463026	0.39787419	0.240009827	-0.025414005	0.978203774	FALSE
367	PF3D7_0404200.iso1.exon2.amp1_2698	-0.594692004	-0.842770266	-0.248078262	0.183347757	0.444815715	0.32952322	-0.095373141	0.939531746	FALSE
368	PF3D7_0404600.s3_7434	1.283132603	1.759137572	0.476004969	0.305058186	1.241514293	0.832312435	0.065950162	0.978054103	FALSE
369	PF3D7_0404600.s5_7440	0.281344447	-0.04838669	-0.329731137	0.536216556	1.008898124	1.042372201	-0.054267506	0.978054103	FALSE
370	PF3D7_0404700.1o2_6213	-0.153518899	-0.181107351	-0.027588452	0.943664286	0.621120985	0.792453736	-0.007157446	0.998284684	FALSE
371	PF3D7_0404800.1o2_6179	-0.598827874	-0.732691119	-0.133863245	0.40752377	0.580004654	0.264603298	-0.040278923	0.978054103	FALSE
372	PF3D7_0404800.e1_7407	-0.565460772	-0.833949691	-0.268488919	0.243394126	0.691366817	0.395360551	-0.067288854	0.959883446	FALSE
373	PF3D7_0405300.iso1.exon1.amp1_1116	0.639537964	1.327008868	0.687470905	0.265494914	1.127212214	1.152519636	0.10139221	0.978054103	FALSE
374	PF3D7_0405300.iso1.exon1.amp2_3940	-0.069022837	-0.003212528	0.065810309	0.905850337	0.808912855	1.135520609	0.012882576	0.998284684	FALSE
375	PF3D7_0405400.e2s1_6356	-0.085785183	-0.117471222	-0.03168604	0.879920319	0.63553334	0.380808967	-0.008622268	0.996647775	FALSE
376	PF3D7_0405400.e2s4_7512	-0.394038965	-0.152202596	0.241836368	0.625362817	0.723639139	0.996440609	0.053117518	0.978203774	FALSE
377	PF3D7_0405600.2o9_6125	-0.461722561	-0.325447632	0.136274929	0.473722991	0.524254358	0.347420501	0.044739817	0.978054103	FALSE
378	PF3D7_0405700.iso1.exon1.amp1_1975	0.031953607	-0.280039253	-0.31199286	0.473795918	0.782363944	0.849314182	-0.065814358	0.978054103	FALSE
379	PF3D7_0405700.iso1.exon1.amp3_181	-0.407999384	-0.537926076	-0.129926692	0.537967145	0.415099356	0.410906582	-0.052225254	0.978054103	FALSE
380	PF3D7_0405900.e3s1_6875	-0.153801929	-0.334321348	-0.180519419	0.259087437	0.552512265	0.261480754	-0.056965403	0.976799056	FALSE
381	PF3D7_0406200_8002	0.23334062	0.940981643	0.707641022	0.46134036	1.100565769	1.915213188	0.096808225	0.978054103	FALSE
382	PF3D7_0406500.iso1.exon2.amp4_169	-0.198319493	0.025391855	0.223711349	0.685079525	0.964402184	1.100681911	0.038027513	0.978203774	FALSE
383	PF3D7_0406700.iso1.exon9.amp1_3850	-0.366326523	-0.532523837	-0.166197313	0.470560411	0.525631149	0.436655851	-0.05362908	0.978054103	FALSE
384	PF3D7_0406800.iso1.exon3.amp1_3542	-0.263953014	-0.386824859	-0.122871846	0.431635873	0.273012542	0.303475068	-0.074046926	0.978054103	FALSE
385	PF3D7_0406900.4o8_8241	-0.142533454	-0.635172003	-0.492638548	0.005473551	0.683699315	0.226943819	-0.126507997	0.451406931	FALSE
386	PF3D7_0407000.1o1_5004	-0.617716107	-0.626207185	-0.008491078	0.972460881	0.694719057	0.457212098	-0.002104405	0.998284684	FALSE
387	PF3D7_0407200.iso1.exon5.amp1_341	-0.098871463	-0.197791469	-0.098920007	0.848708499	0.64296362	1.065206058	-0.023467707	0.993519608	FALSE
388	PF3D7_0407700.e2s1_5470	-0.727061451	-1.056082197	-0.329020746	0.024341175	0.650094974	0.173693308	-0.08907225	0.672962647	FALSE
389	PF3D7_0407700.e2s2_6343	0.759381227	0.799421274	0.040040047	0.943589869	1.141921617	1.122624199	0.005854868	0.998284684	FALSE
390	PF3D7_0408000.iso1.exon1.amp1_683	-0.640251696	-0.321468949	0.318782747	0.367356899	0.313539684	0.696544333	0.141346236	0.978054103	FALSE
391	PF3D7_0408600_7148	-0.450557922	-0.891210215	-0.440652293	0.090357219	0.886554269	0.404472142	-0.086743751	0.912416971	FALSE
392	PF3D7_0408700.e3s1_8902	0.013918514	-0.155109923	-0.169028437	0.621495964	0.781122449	0.65869259	-0.036658467	0.978203774	FALSE
393	PF3D7_0408700.e5s1_7160	-0.797081985	-0.685241514	0.111840471	0.632988637	0.717369663	0.419736698	0.026988692	0.978203774	FALSE
394	PF3D7_0408700.e6s1_5713	-0.558416787	-0.544489506	0.013927281	0.904591169	0.360832335	0.209142125	0.006684261	0.998284684	FALSE
395	PF3D7_0408900.1.e3s1_7464	-0.385381646	-0.761456293	-0.376074647	0.04790264	0.333908574	0.306076951	-0.1894019	0.820283309	FALSE
396	PF3D7_0409200.iso1.exon1.amp1_3910	-0.824356578	-0.989845292	-0.165488714	0.316486764	0.490166614	0.289204373	-0.058425233	0.978054103	FALSE
397	PF3D7_0409500.2o2_7867	-0.134894969	-0.562833801	-0.427938832	0.002824358	0.54972274	0.178791481	-0.13671324	0.329117612	FALSE
398	PF3D7_0409600.iso1.exon1.amp1_551	-0.123298243	-0.056087876	0.067210367	0.724407467	0.560394353	0.348039752	0.020708202	0.978466981	FALSE
399	PF3D7_0409600.iso1.exon1.amp2_1059	-0.254451318	-0.256690657	-0.002239339	0.988006565	0.444792518	0.272132711	-0.000869876	0.998284684	FALSE
400	PF3D7_0409900.7o7_7316	-0.479284922	-0.666976313	-0.187691391	0.167486655	0.450508694	0.221127273	-0.072564341	0.924994436	FALSE
401	PF3D7_0410300.1o2_7946	0.117722072	0.859425525	0.741703453	0.117261295	0.946456656	0.821542908	0.132437127	0.912416971	FALSE
402	PF3D7_0410500.iso1.exon1.amp1_4441	-0.514701799	-0.609563242	-0.094861443	0.732289225	0.863653591	0.496345052	-0.019027872	0.980114074	FALSE
403	PF3D7_0410800.iso1.exon1.amp2_1340	0.223460937	0.254761399	0.031300462	0.956523574	1.037716046	1.153093647	0.004962838	0.998284684	FALSE
404	PF3D7_0410900.1o1_6799	0.589859839	0.581016813	-0.008843026	0.977424753	0.845289897	0.587852221	-0.001795866	0.998284684	FALSE
405	PF3D7_0411000.iso1.exon1.amp1_3723	-0.075629056	-0.225228043	-0.149598986	0.608049163	0.752093233	0.547879893	-0.034051427	0.978203774	FALSE
406	PF3D7_0411700.1o1_4939	-0.415656165	0.512330282	0.927986447	0.101470359	0.643196623	0.981022305	0.224488968	0.912416971	FALSE
407	PF3D7_0411900.iso1.exon1.amp1_724	-0.659315197	-0.675707771	-0.016392575	0.920206583	0.397631257	0.315219321	-0.007017307	0.998284684	FALSE
408	PF3D7_0411900.iso1.exon2.amp2_seg2_2021	-0.862706325	-1.177759136	-0.315052811	0.031415009	0.731325707	0.132588869	-0.075998876	0.719141105	FALSE
409	PF3D7_0412000.1o1_7937	-0.074944631	-0.279049437	-0.204104806	0.774512581	1.110629849	1.441407442	-0.02952694	0.982640702	FALSE
410	PF3D7_0412400.iso1.exon1.amp1_3330	-0.123949778	0.747085205	0.871034984	0.234948601	1.112060512	1.369359628	0.126953206	0.956958241	FALSE
411	PF3D7_0412400.iso1.exon2.amp2_3106	-0.764110161	-0.53709607	0.227014091	0.552560136	0.397619496	0.773764789	0.083148716	0.978054103	FALSE
412	PF3D7_0412700.iso1.exon1.amp1_2752	0.504960009	1.144109933	0.639149924	0.384749285	1.057105048	1.433532678	0.096378327	0.978054103	FALSE
413	PF3D7_0412700.iso1.exon2.amp2_1081	-0.415075003	0.133359615	0.548434618	0.318194332	0.437209189	1.070300084	0.167668962	0.978054103	FALSE
414	PF3D7_0412900.iso1.exon1.amp1_435	1.113141285	2.697406982	1.584265697	0.002986648	1.031063536	0.69136234	0.26429816	0.329117612	FALSE
415	PF3D7_0412900.iso1.exon2.amp2_3385	-1.144151391	-0.228291688	0.915859702	0.160886824	1.453679784	1.152559155	0.107240667	0.916954512	FALSE
416	PF3D7_0413200.iso1.exon1.amp1_2147	-0.276169583	0.406809531	0.682979114	0.100575482	0.781555045	0.714392548	0.146994776	0.912416971	FALSE
417	PF3D7_0413300.iso1.exon2.amp1_707	-0.081399261	-0.010087891	0.07131137	0.859219909	0.723378844	0.80646702	0.016212817	0.993519608	FALSE
418	PF3D7_0414000.e2s1_8062	-0.260475812	-0.448704944	-0.188229132	0.271480677	0.52798851	0.293456935	-0.061838678	0.978054103	FALSE
419	PF3D7_0414700.1o1_7337	-0.3257356	0.09325812	0.41899372	0.224825315	0.561393754	0.640050776	0.122369148	0.956958241	FALSE
420	PF3D7_0414900.e4s1_5677	-0.444296236	-0.231255419	0.213040817	0.635016128	0.588242842	0.908685963	0.056188439	0.978203774	FALSE
421	PF3D7_0415000.1o1_7877	-0.442401614	-0.522756059	-0.080354445	0.578867531	0.587099743	0.219358634	-0.023986478	0.978203774	FALSE
422	PF3D7_0415100.iso1.exon1.amp1_2166	-0.170193113	-0.553265394	-0.383072281	0.003392826	0.511556012	0.162435228	-0.131550614	0.342797118	FALSE
423	PF3D7_0415300.iso1.exon1.amp1_4554	-0.21863733	0.273814209	0.49245154	0.388004088	1.003691173	1.099140972	0.080883026	0.978054103	FALSE
424	PF3D7_0415300.iso1.exon1.amp2_3693	-0.036811623	0.36287118	0.399682803	0.363119044	0.830452728	0.83776266	0.080135156	0.978054103	FALSE
425	PF3D7_0415400.1o1_6387	-0.568145666	-0.704505617	-0.136359951	0.065778571	0.321237574	0.095443173	-0.074628129	0.865570079	FALSE
426	PF3D7_0416300.iso1.exon1.amp2_462	-0.35189078	-0.181553248	0.170337531	0.499675574	0.440572311	0.494928155	0.063520134	0.978054103	FALSE
427	PF3D7_0416400.iso1.exon2.amp1_1080	-0.107907631	-0.041391123	0.066516508	0.85427042	0.621369568	0.729441306	0.017478012	0.993519608	FALSE
428	PF3D7_0416400.iso1.exon2.amp2_3664	-0.496529127	-0.532037223	-0.035508095	0.869345063	0.452506074	0.42561086	-0.013162929	0.995523014	FALSE
429	PF3D7_0416600.1o1_5263	-0.545880309	0.360301046	0.906181355	0.165963275	0.509972799	1.195187384	0.241874615	0.924994436	FALSE
430	PF3D7_0416900.iso1.exon2.amp2_seg1_2886	-0.595560857	-0.388452016	0.207108841	0.426395496	0.51247717	0.499934825	0.067537121	0.978054103	FALSE
431	PF3D7_0417100.1o4_5878	0.056494312	0.052813611	-0.003680701	0.994561975	0.782618287	1.103257844	-0.000744093	0.999164392	FALSE
432	PF3D7_0417400.iso1.exon1.amp4_seg2_2328	0.476302593	0.223133395	-0.253169198	0.728932313	1.113144937	1.476774548	-0.036400147	0.979830396	FALSE
433	PF3D7_0417400.iso1.exon1.amp6_seg1_1730	-0.441323186	-0.321821005	0.119502181	0.669244035	0.500480996	0.556429719	0.039283889	0.978203774	FALSE
434	PF3D7_0418000.6o10_5641	-0.398431003	-0.144085339	0.254345664	0.38275809	0.820784273	0.523186108	0.053439538	0.978054103	FALSE
435	PF3D7_0418000.7o10_5069	-0.778610519	-0.8801899	-0.101579381	0.775528512	0.598157645	0.716758768	-0.027641968	0.982640702	FALSE
436	PF3D7_0418800.iso1.exon4.amp1_2929	-0.534844345	-0.66360322	-0.128758875	0.496915281	0.380087429	0.366681887	-0.056678821	0.978054103	FALSE
437	PF3D7_0419100.iso1.exon1.amp1_2401	-0.534457822	-0.903012851	-0.368555029	0.000795615	0.467161893	0.119376436	-0.138897592	0.241372595	FALSE
438	PF3D7_0419200.1o1_6384	-0.941893833	-1.180270063	-0.23837623	0.176545016	0.642707615	0.274986491	-0.064827849	0.932264079	FALSE
439	PF3D7_0419300.iso1.exon1.amp1_2162	-0.078166627	0.519630689	0.597797316	0.121850473	0.586085355	0.679490467	0.166837392	0.912416971	FALSE
440	PF3D7_0419400.2o4_8826	-0.474647632	-0.761473807	-0.286826175	0.146917112	0.614996235	0.326228793	-0.081033549	0.916954512	FALSE
441	PF3D7_0419400.3o4_9115	-0.544513138	-0.552040934	-0.007527796	0.956190349	0.475479263	0.234659076	-0.002757076	0.998284684	FALSE
442	PF3D7_0419400.4o4_8537	-0.69550818	-0.852792257	-0.157284077	0.474490952	0.542516274	0.411621946	-0.049500323	0.978054103	FALSE
443	PF3D7_0419500.1o1_5301	-0.314564834	-0.120376509	0.194188325	0.275707692	0.553738291	0.304916111	0.060850676	0.978054103	FALSE
444	PF3D7_0419700.1o1_8146	0.145991394	-0.328902055	-0.474893449	0.06241888	0.688039541	0.41061594	-0.119384905	0.862760147	FALSE
445	PF3D7_0419900.iso1.exon3.amp1_2826	-0.464382981	-0.659748073	-0.195365093	0.564341692	0.949855556	0.62162349	-0.03542335	0.978054103	FALSE
446	PF3D7_0419900.iso1.exon3.amp5_seg1_2006	-0.587916747	-0.161546266	0.42637048	0.411070083	0.50149776	1.029478382	0.12163508	0.978054103	FALSE
447	PF3D7_0420000.s2_5994	-0.333294297	-0.403647628	-0.070353331	0.827661095	0.743005453	0.627565911	-0.016038686	0.989130662	FALSE
448	PF3D7_0420300.iso1.exon1.amp1_521	-0.197713775	-0.349154056	-0.151440281	0.774626916	0.777554104	1.074082584	-0.030937439	0.982640702	FALSE
449	PF3D7_0420300.iso1.exon1.amp3_1099	-0.495703795	-0.449839674	0.045864121	0.924322601	0.739920406	0.98236576	0.009919123	0.998284684	FALSE
450	PF3D7_0420300.iso1.exon1.amp4_seg1_3445	0.02511234	-0.061707411	-0.086819752	0.78919192	1.011270966	0.58240746	-0.014871498	0.982733913	FALSE
451	PF3D7_0420600.iso1.exon1.amp1_2477	-0.42035239	-0.592155809	-0.171803419	0.339825869	0.568374337	0.309867098	-0.052468781	0.978054103	FALSE
452	PF3D7_0420700.e2s1_8336	1.466007416	1.818267447	0.352260031	0.560255194	0.950143762	1.203745948	0.059812786	0.978054103	FALSE
453	PF3D7_0420900.iso1.exon1.amp1_4190	0.045991666	0.471106109	0.425114443	0.371920499	0.81148668	0.916661087	0.086003042	0.978054103	FALSE
454	PF3D7_0421200.iso1.exon2.amp1_3312	0.3629836	1.008963608	0.645980008	0.331345446	1.174161835	1.266047439	0.090876353	0.978054103	FALSE
455	PF3D7_0421300.iso1.exon1.amp1_2739	0.671997644	1.855631997	1.183634353	0.037059974	1.198722951	0.894545909	0.168776054	0.761128597	FALSE
456	PF3D7_0421800.iso1.exon1.amp1_1236	-0.464954365	0.134514756	0.599469121	0.46338399	0.360020824	1.651397958	0.154493419	0.978054103	FALSE
457	PF3D7_0422000.5o5_7285	-0.037720988	-0.289743719	-0.252022731	0.343497945	0.842175448	0.457872151	-0.051949769	0.978054103	FALSE
458	PF3D7_0422100 (renamed)_7011	1.85448997	1.895168715	0.040678745	0.941909801	1.091171532	1.11172595	0.006200228	0.998284684	FALSE
459	PF3D7_0422200.iso1.exon1.amp4_2550	-0.202241329	-0.497303575	-0.295062246	0.320829246	0.804697308	0.533254566	-0.063110552	0.978054103	FALSE
460	PF3D7_0422300.e3s1_6907	-0.159117895	0.023577336	0.182695231	0.578224487	0.680043521	0.638803036	0.045070834	0.978203774	FALSE
461	PF3D7_0422400.e2s1_5434	-0.14401291	-0.507770125	-0.363757215	0.147568696	0.679605252	0.428639846	-0.092351078	0.916954512	FALSE
462	PF3D7_0422500.e1s2_8254	-0.580583601	-0.49185977	0.088723831	0.683617947	0.444941258	0.427315799	0.033378603	0.978203774	FALSE
463	PF3D7_0422500.e1s3_5652	-0.001127542	0.249893764	0.251021307	0.670502835	1.018337045	1.177362889	0.040335931	0.978203774	FALSE
464	PF3D7_0422700.e1s1_4878	-0.204325717	-0.316084778	-0.111759062	0.632637713	0.687310893	0.424824346	-0.028081777	0.978203774	FALSE
465	PF3D7_0423100.iso1.exon1.amp1_3832	-0.647074318	-0.946199292	-0.299124973	0.018848314	0.414800859	0.184624353	-0.125929144	0.623576266	FALSE
466	PF3D7_0423400.1o1_7833	-0.274394357	-0.423340719	-0.148946362	0.408306723	0.571719128	0.312447164	-0.045218172	0.978054103	FALSE
467	PF3D7_0423700.1o1_6673	0.854372823	1.318669465	0.464296642	0.52505531	1.370362691	1.42793002	0.056201623	0.978054103	FALSE
468	PF3D7_0424200.iso1.exon1.amp2_2772	-0.150870909	-0.162978882	-0.012107973	0.985173954	0.947337907	1.330820642	-0.002023548	0.998284684	FALSE
469	PF3D7_0424600.e2s1_8623	-0.218732922	0.067518399	0.28625132	0.567402336	0.688087287	1.004641913	0.065347927	0.978054103	FALSE
470	PF3D7_0424800.2o2_6416	0.254821051	1.084830628	0.830009577	0.2998805	0.820290572	1.545317947	0.148872362	0.978054103	FALSE
471	PF3D7_0425100.2o2_8127	0.68321657	0.481991509	-0.201225061	0.534683979	0.978933471	0.579615087	-0.035566479	0.978054103	FALSE
472	PF3D7_0425200.2o2_5531	-0.311750273	0.407645335	0.719395608	0.310867059	0.764362232	1.373085553	0.140445239	0.978054103	FALSE
473	PF3D7_0425300.1o1_8130	-0.408712983	-0.119882567	0.288830415	0.646260448	0.361041598	1.298249845	0.087431912	0.978203774	FALSE
474	PF3D7_0425500.iso1.exon1.amp1_1565	0.756067634	1.070532103	0.314464469	0.576660328	1.201591194	1.090568269	0.044051267	0.978203774	FALSE
475	PF3D7_0425700.iso1.exon1.amp1_4168	0.368226521	0.534482057	0.166255536	0.820373016	1.061682408	1.490957529	0.024794592	0.98765431	FALSE
476	PF3D7_0425800.iso1.exon1.amp1_3955	-0.603707474	-0.257905439	0.345802035	0.378228334	0.362797424	0.774301819	0.134500627	0.978054103	FALSE
477	PF3D7_0425800.iso1.exon1.amp2_4244	-0.852744072	-0.147001756	0.705742315	0.276856319	0.717144221	1.241749676	0.148371197	0.978054103	FALSE
478	PF3D7_0425800.iso1.exon2.amp1_4183	1.19996125	1.308996257	0.109035006	0.847881158	1.209084506	1.11783407	0.015152735	0.993519608	FALSE
479	PF3D7_0425900.iso1.exon2.amp1_4457	-0.31603538	-0.535158139	-0.219122759	0.540860881	0.805013315	0.686304023	-0.04607087	0.978054103	FALSE
480	PF3D7_0426000.iso1.exon1.amp1_4198	-0.354783133	-0.081470036	0.273313097	0.48575449	0.670836716	0.768821436	0.066751044	0.978054103	FALSE
481	PF3D7_0500100.iso1.exon1.amp1_2232	-0.609010388	-0.558341611	0.050668777	0.838046647	0.563273991	0.482504352	0.015219126	0.992768398	FALSE
482	PF3D7_0500100.iso1.exon2.amp1_1299	1.410788339	1.693029849	0.28224151	0.723583976	1.388326003	1.596735914	0.033291014	0.978466981	FALSE
483	PF3D7_0500400.iso1.exon1.amp1_3882	0.646702392	0.392606902	-0.25409549	0.750012936	1.393364566	1.59728314	-0.029876611	0.980535118	FALSE
484	PF3D7_0500500.iso1.exon1.amp1_2721	0.939924382	2.236407336	1.296482954	0.171241209	1.191681685	1.728122172	0.171140387	0.926254722	FALSE
485	PF3D7_0500800.e1s1_7120	-0.286718307	-0.528860778	-0.242142471	0.188363026	0.50361232	0.318544841	-0.082947419	0.941095042	FALSE
486	PF3D7_0500800.e2s1_8081	-0.349058336	0.500167129	0.849225466	0.356049621	1.23850739	1.788063908	0.10796193	0.978054103	FALSE
487	PF3D7_0500900.iso1.exon2.amp1_442	0.505475233	-0.01759199	-0.523067223	0.405433072	1.240698433	1.202707306	-0.07050175	0.978054103	FALSE
488	PF3D7_0501000.e1s1_4842	-0.437500015	-0.582534284	-0.145034269	0.335757381	0.378014306	0.275349983	-0.065681496	0.978054103	FALSE
489	PF3D7_0501000.e2s1_5152	-0.165028487	0.123232529	0.288261016	0.522053783	0.53363578	0.904519582	0.081909619	0.978054103	FALSE
490	PF3D7_0501100.1.e3s1_7453	0.020717265	0.312436441	0.291719176	0.677549567	1.11757704	1.409367668	0.042144432	0.978203774	FALSE
491	PF3D7_0501100.1.e4s1_6302	-0.824979752	-0.781539101	0.043440651	0.856618683	0.811800269	0.417041516	0.009307312	0.993519608	FALSE
492	PF3D7_0501100.iso2.exon3.amp1_2407	-0.498867838	-0.294267953	0.204599884	0.689133687	0.729775158	1.035389315	0.044300198	0.978203774	FALSE
493	PF3D7_0501200.e2_7703	-0.260380095	0.224177686	0.484557781	0.429478887	0.8660188	1.206526459	0.088730688	0.978054103	FALSE
494	PF3D7_0501500.e1s1_8931	-0.584070671	-0.169615651	0.41445502	0.32837677	0.451039987	0.824351583	0.136432774	0.978054103	FALSE
495	PF3D7_0501600.e1s1_8642	-0.408064571	-0.7505312	-0.342466629	0.082410426	0.62694894	0.312320129	-0.095099338	0.912416971	FALSE
496	PF3D7_0501800.e1s1_4880	0.430389511	0.478687942	0.048298431	0.887930756	0.887960246	0.650923185	0.009307809	0.9967683	FALSE
497	PF3D7_0501800.e1s2_6042	0.251864243	0.656636113	0.404771871	0.559500578	1.172111254	1.373256343	0.0564001	0.978054103	FALSE
498	PF3D7_0501900.iso1.exon2.amp1_2980	-0.587879965	-0.71388649	-0.126006525	0.424813863	0.597919515	0.25020074	-0.036853074	0.978054103	FALSE
499	PF3D7_0502000.iso1.exon2.amp1_1211	-0.161430233	-0.512528646	-0.351098413	0.021714908	0.550198127	0.215948852	-0.111735984	0.658237274	FALSE
500	PF3D7_0502200.2o2_5863	-0.402777546	-0.840302155	-0.437524609	0.033740938	0.576773421	0.317491373	-0.13162838	0.733931777	FALSE
501	PF3D7_0502400.1o1_5886	0.773481413	0.991894072	0.218412659	0.771196858	1.264904787	1.510498178	0.028120683	0.982640702	FALSE
502	PF3D7_0502700.iso1.exon2.amp1_3857	0.271892505	0.378533977	0.106641472	0.852067259	0.839270782	1.164855845	0.020165025	0.993519608	FALSE
503	PF3D7_0502800.1o1_6679	-0.868784868	-0.76932149	0.099463378	0.831046148	0.659506267	0.950969776	0.023752062	0.989130662	FALSE
504	PF3D7_0503000.5o5_8733	-0.824431845	-0.84058099	-0.016149146	0.962224102	0.589666331	0.687606103	-0.004475902	0.998284684	FALSE
505	PF3D7_0503600.e1s1_5436	-0.370016253	-0.433067918	-0.063051665	0.773141544	0.453724951	0.430495584	-0.023290207	0.982640702	FALSE
506	PF3D7_0503600.e7s1_7736	-0.636345043	-0.733978531	-0.097633488	0.704246021	0.611863757	0.493950207	-0.027124579	0.978203774	FALSE
507	PF3D7_0503900.2o2_5032	-0.430597224	-0.43979241	-0.009195185	0.982872792	0.800133372	0.857524758	-0.001899725	0.998284684	FALSE
508	PF3D7_0504200.2o3_7328	-0.529634142	-0.594189696	-0.064555554	0.674372526	0.39916038	0.289349037	-0.02769472	0.978203774	FALSE
509	PF3D7_0504400.iso1.exon1.amp1_2757	-0.518046917	-0.623381499	-0.105334582	0.636311036	0.698135736	0.395917037	-0.026151551	0.978203774	FALSE
510	PF3D7_0504500.5o6_9016	-0.112255413	0.196851091	0.309106504	0.464944851	0.538785212	0.840718656	0.088801362	0.978054103	FALSE
511	PF3D7_0504600_5397	-0.283018689	-0.249400923	0.033617766	0.888670167	0.484175074	0.476090204	0.01159353	0.9967683	FALSE
512	PF3D7_0504800.iso1.exon1.amp1_1378	0.065814923	0.108138688	0.042323765	0.905596292	0.766126338	0.701793292	0.009290727	0.998284684	FALSE
513	PF3D7_0504800.iso1.exon1.amp2_1667	-0.631231768	-0.336299548	0.29493222	0.341932063	0.438588307	0.599877851	0.107018903	0.978054103	FALSE
514	PF3D7_0505100.iso1.exon1.amp1_1083	-0.035037038	-0.45477357	-0.419736531	0.15306184	0.847600781	0.495753136	-0.08572704	0.916954512	FALSE
515	PF3D7_0505100.iso1.exon1.amp2_3685	-0.164593547	0.161752967	0.326346514	0.510434397	0.478457304	1.000268527	0.096963748	0.978054103	FALSE
516	PF3D7_0505100.iso1.exon2.amp1_507	-0.537597802	-0.345889218	0.191708584	0.549410386	0.649557192	0.622349543	0.049415237	0.978054103	FALSE
517	PF3D7_0505100.iso1.exon2.amp2_1332	-0.30147164	0.033243191	0.334714831	0.424192987	0.741301573	0.811681669	0.074435854	0.978054103	FALSE
518	PF3D7_0505200.e1s1_6332	-0.61445565	-0.629201048	-0.014745399	0.956944706	0.64742466	0.528789558	-0.003868125	0.998284684	FALSE
519	PF3D7_0505400.1o1_4753	-0.642625203	-0.457536927	0.185088275	0.447750864	0.418895702	0.475336628	0.072492083	0.978054103	FALSE
520	PF3D7_0505500.e1s1_4811	-0.04877589	-0.224565429	-0.175789539	0.582230354	0.83317378	0.597508413	-0.036153717	0.978203774	FALSE
521	PF3D7_0505500.e2_6247	-0.124625456	-0.195768183	-0.071142728	0.851431264	0.856514771	0.740518899	-0.014041841	0.993519608	FALSE
522	PF3D7_0506200.1o1_7857	-0.116607021	-0.476565016	-0.359957996	0.044232711	0.737602859	0.238894607	-0.085708809	0.805380008	FALSE
523	PF3D7_0506300.iso1.exon1.amp1_3900	0.89343369	0.551669755	-0.341763935	0.534975417	0.680733584	1.10664152	-0.076947001	0.978054103	FALSE
524	PF3D7_0506800.e1_6284	-0.709721037	-0.471962586	0.237758452	0.625754184	0.755466971	0.977253191	0.050594388	0.978203774	FALSE
525	PF3D7_0506900.1o1_6208	-0.702293645	-0.576781236	0.12551241	0.724779148	0.631464194	0.712191948	0.032637777	0.978466981	FALSE
526	PF3D7_0507200.iso1.exon1.amp1_150	-0.234708033	-0.606310318	-0.371602285	0.053128176	0.595352688	0.298743205	-0.108642523	0.820283309	FALSE
527	PF3D7_0507300 (plasmodb revised)_5405	-0.024868768	-0.192697371	-0.167828604	0.705102568	0.813552192	0.882054522	-0.03405147	0.978203774	FALSE
528	PF3D7_0507700.e1s1_5454	-0.480053491	-0.323481565	0.156571926	0.33571659	0.532215617	0.275987741	0.051153128	0.978054103	FALSE
529	PF3D7_0507900.iso1.exon2.amp1_43	-0.4210566	-0.714657499	-0.293600899	0.046296619	0.476343177	0.224723679	-0.107474087	0.811348251	FALSE
530	PF3D7_0508000.1o1_6429	-0.15384268	-0.580540718	-0.426698038	0.025611435	0.681835054	0.273079422	-0.109535641	0.674546004	FALSE
531	PF3D7_0508400.4o4_6424	-0.618445033	-0.26702946	0.351415573	0.551317712	0.4768432	1.200137103	0.097325028	0.978054103	FALSE
532	PF3D7_0508500.s3_4828	-0.547252479	-0.721467875	-0.174215396	0.536816967	0.860263183	0.50286682	-0.035058873	0.978054103	FALSE
533	PF3D7_0508600.iso1.exon1.amp1_3875	-0.11242488	-0.400759676	-0.288334797	0.354375717	0.934845657	0.546442314	-0.053395002	0.978054103	FALSE
534	PF3D7_0508900.iso1.exon1.amp1_1678	-0.790665091	-1.21349909	-0.422833999	0.000931694	0.60153968	0.114287563	-0.123980403	0.241372595	FALSE
535	PF3D7_0508900.iso1.exon1.amp2_1967	-0.196448137	-0.8600759	-0.663627763	0.002448703	1.03636539	0.204736358	-0.11292235	0.298528843	FALSE
536	PF3D7_0508900.iso1.exon1.amp4_4215	-0.430821565	-0.459354767	-0.028533202	0.933063294	0.593462051	0.684273757	-0.007870447	0.998284684	FALSE
537	PF3D7_0509000.e5s1_6290	-0.157350323	-0.265926375	-0.108576053	0.753733728	0.825401693	0.665946343	-0.022361802	0.980535118	FALSE
538	PF3D7_0509100.iso1.exon1.amp1_2855	-0.057890437	-0.299175161	-0.241284724	0.697815518	0.768872932	1.267347609	-0.047930236	0.978203774	FALSE
539	PF3D7_0509100.iso1.exon1.amp2_3351	-0.560175295	-0.737037881	-0.176862586	0.494024705	0.494768427	0.502641277	-0.059471675	0.978054103	FALSE
540	PF3D7_0509200.iso1.exon4.amp1_392	-0.303669101	-0.416389969	-0.112720868	0.619933795	0.643801407	0.417295113	-0.030169147	0.978203774	FALSE
541	PF3D7_0509500.1o1_6441	-0.290034611	-0.104511497	0.185523114	0.695043314	0.638960917	0.961187492	0.045316717	0.978203774	FALSE
542	PF3D7_0509600.2o2_7637	-0.376058889	-0.736084521	-0.360025632	0.190611249	0.603539846	0.492429953	-0.101320124	0.941095042	FALSE
543	PF3D7_0509700.e4s1_9186	-0.210349201	0.023653568	0.234002769	0.650331487	0.910953184	1.026663558	0.042184308	0.978203774	FALSE
544	PF3D7_0509800.2o4_8246	-0.50647058	-0.804024516	-0.297553937	0.07034121	0.516529441	0.258937163	-0.100271923	0.867422801	FALSE
545	PF3D7_0509900.iso1.exon1.amp1_3597	0.037195085	0.515419836	0.47822475	0.003051732	0.746859237	0.161893166	0.112861714	0.329117612	FALSE
546	PF3D7_0510100.iso1.exon1.amp2_4582	-0.273936952	-0.352649346	-0.078712394	0.814815654	0.734234135	0.657679704	-0.018066725	0.985718836	FALSE
547	PF3D7_0510100.iso1.exon1.amp3_1915	-0.144951383	-0.124069874	0.020881509	0.957969886	1.017481148	0.754698179	0.003509282	0.998284684	FALSE
548	PF3D7_0510400.1o1_8464	0.207797885	0.47876225	0.270964365	0.592107698	0.911039929	0.999125969	0.0490215	0.978203774	FALSE
549	PF3D7_0510800.1o1_4938	-0.115126946	0.890023736	1.005150682	0.14687117	0.956286763	1.242769077	0.168840153	0.916954512	FALSE
550	PF3D7_0511100.iso1.exon2.amp1_1537	-0.2808676	-0.604325206	-0.323457606	0.007094785	0.526962836	0.137879098	-0.108046837	0.487896034	FALSE
551	PF3D7_0511300.iso1.exon1.amp1_2538	-0.244627853	-0.628294705	-0.383666852	0.028637808	0.62610871	0.251686593	-0.107247478	0.694180862	FALSE
552	PF3D7_0511400.1o1_4698	-0.295755127	0.411190017	0.706945144	0.090302044	0.641522634	0.713120927	0.181304899	0.912416971	FALSE
553	PF3D7_0511400_8865	0.276606318	1.018764783	0.742158465	0.238118813	1.008561366	1.17304855	0.120307846	0.956958241	FALSE
554	PF3D7_0511500.s1_7710	-0.613340026	-0.663984755	-0.050644729	0.833775486	0.654750137	0.452644546	-0.013282621	0.989130662	FALSE
555	PF3D7_0511500.s3_7138	-0.221119343	0.363901794	0.585021138	0.312911249	0.842817272	1.111145462	0.111216955	0.978054103	FALSE
556	PF3D7_0511500.s4_7427	-0.742943547	-0.717452362	0.025491185	0.911880566	0.50981213	0.450943361	0.008436134	0.998284684	FALSE
557	PF3D7_0511600.1o1_5809	-0.059693317	-0.085404996	-0.025711679	0.969230613	1.168840134	1.342626203	-0.003602879	0.998284684	FALSE
558	PF3D7_0512100.iso1.exon2.amp1_3546	-0.606191717	-1.015439578	-0.409247861	0.029099833	0.54733415	0.284669693	-0.129998347	0.697401129	FALSE
559	PF3D7_0512600.e6s1_7173	-0.19626015	-0.611943144	-0.415682994	0.053052551	0.783863345	0.314993518	-0.0928127	0.820283309	FALSE
560	PF3D7_0512900.iso1.exon1.amp1_3002	-0.693734512	-0.684578077	0.009156435	0.987637384	0.915494301	1.20207726	0.001603677	0.998284684	FALSE
561	PF3D7_0513000.e1s1_5733	-0.326548352	-0.566057272	-0.23950892	0.191049143	0.603463417	0.300749258	-0.069096581	0.941479433	FALSE
562	PF3D7_0513100.2o3_7569	-0.298238394	0.071399021	0.369637415	0.327437758	0.699969423	0.71524004	0.087797871	0.978054103	FALSE
563	PF3D7_0513200.e2s3_5488	-0.274778298	0.274535522	0.549313819	0.365113875	0.782238599	1.182937317	0.109473568	0.978054103	FALSE
564	PF3D7_0513300.e1s1_8334	-0.461334499	-0.626032717	-0.164698217	0.401718729	0.363530072	0.377777489	-0.075175713	0.978054103	FALSE
565	PF3D7_0513400.iso1.exon2.amp1_92	-0.261497965	-0.413600655	-0.152102689	0.496886895	0.572956344	0.417028966	-0.045448195	0.978054103	FALSE
566	PF3D7_0513700.e3s1_8904	-0.704796997	-0.865871257	-0.16107426	0.349346175	0.531842344	0.299029869	-0.052511285	0.978054103	FALSE
567	PF3D7_0514000.iso1.exon2.amp1_129	-0.205650226	-0.521719488	-0.316069262	0.109934083	0.691111588	0.307250524	-0.079865553	0.912416971	FALSE
568	PF3D7_0514100.iso1.exon1.amp2_3648	-0.410663632	-0.54301386	-0.132350228	0.712450519	0.764684866	0.702201437	-0.029100882	0.978203774	FALSE
569	PF3D7_0514600.iso1.exon2.amp1_2392	-0.395320826	-0.710280119	-0.314959292	0.009655143	0.520340613	0.146256989	-0.106477477	0.496931373	FALSE
570	PF3D7_0514900.1o1_8458	-0.660903276	-0.763840301	-0.102937025	0.752082779	0.353992912	0.669873127	-0.042724335	0.980535118	FALSE
571	PF3D7_0516000.iso1.exon1.amp1_2533	-0.503051005	-0.699454714	-0.196403709	0.207285424	0.521785343	0.255098746	-0.065567716	0.956958241	FALSE
572	PF3D7_0516400.1o1_9029	0.363612138	1.122820286	0.759208148	0.419717602	1.030808364	1.864946139	0.109680322	0.978054103	FALSE
573	PF3D7_0516500.5o6_7013	-0.502576428	-0.733570567	-0.23099414	0.06375625	0.423196552	0.190287414	-0.095293708	0.862760147	FALSE
574	PF3D7_0516600.s1_6862	-0.355646823	-0.339164318	0.016482505	0.95481907	0.606163483	0.574827856	0.004557492	0.998284684	FALSE
575	PF3D7_0516600.s2_5122	-0.386921049	0.681587719	1.068508767	0.164639425	0.691734785	1.402483753	0.22193395	0.924994436	FALSE
576	PF3D7_0516800.iso1.exon1.amp2_530	-0.367615975	-0.547867249	-0.180251274	0.441664678	0.528614679	0.443224827	-0.057792843	0.978054103	FALSE
577	PF3D7_0516800.iso1.exon1.amp3_1048	-0.465545666	-0.442071749	0.023473917	0.929363798	0.505909697	0.528643906	0.007694057	0.998284684	FALSE
578	PF3D7_0517600.1o1_7287	-0.016288262	-0.175855892	-0.15956763	0.533887293	0.852192912	0.441905549	-0.032557656	0.978054103	FALSE
579	PF3D7_0517700_5368	-0.313880517	-0.613714089	-0.299833571	0.027847264	0.663438068	0.134538046	-0.07968774	0.694180862	FALSE
580	PF3D7_0517900.2o2_7334	-0.082557623	-0.224892998	-0.142335375	0.646232423	0.718329017	0.596204208	-0.0336107	0.978203774	FALSE
581	PF3D7_0518400.iso1.exon1.amp1_4147	-0.731430197	-0.781138043	-0.049707846	0.737296952	0.424849668	0.27281828	-0.020169761	0.980535118	FALSE
582	PF3D7_0518600.iso1.exon1.amp1_1407	-0.277377299	-0.224192758	0.053184541	0.856711036	0.684202179	0.571443774	0.013178695	0.993519608	FALSE
583	PF3D7_0518600.iso1.exon1.amp2_1924	-0.499088983	-0.470786374	0.028302609	0.912489006	0.394009361	0.523932396	0.011491643	0.998284684	FALSE
584	PF3D7_0518700.e1s1_5478	-0.47607067	-0.608401866	-0.132331196	0.623358808	0.681234921	0.508819235	-0.033201101	0.978203774	FALSE
585	PF3D7_0518700.e3s1_8039	-0.567373346	-0.724686825	-0.157313479	0.190603354	0.444418499	0.186504549	-0.061897105	0.941095042	FALSE
586	PF3D7_0518800.iso1.exon7.amp1_2109	0.052791184	0.307074612	0.254283428	0.607825782	0.57835558	1.005419747	0.066215779	0.978203774	FALSE
587	PF3D7_0518900.iso1.exon1.amp1_2982	-0.435326202	-0.592279807	-0.156953605	0.126735529	0.363802523	0.159953308	-0.075360868	0.912416971	FALSE
588	PF3D7_0519000.iso1.exon1.amp1_4167	-0.508966289	-0.159973298	0.34899299	0.402788527	0.44461305	0.824731244	0.116031564	0.978054103	FALSE
589	PF3D7_0519100.iso1.exon1.amp1_673	-0.391055832	-0.578044445	-0.186988613	0.069337559	0.402773195	0.146526316	-0.081398553	0.867138269	FALSE
590	PF3D7_0519200.e2s1_5387	-0.324184803	-0.813238643	-0.48905384	0.003545334	0.866579746	0.093455665	-0.099691399	0.342797118	FALSE
591	PF3D7_0519300.1o1_9072	-0.644501183	-0.823429472	-0.17892829	0.322689871	0.510832037	0.321460218	-0.060441412	0.978054103	FALSE
592	PF3D7_0519900.1o1_7902	-1.075443116	-0.815728247	0.259714869	0.503976675	0.754098537	0.755252904	0.057390969	0.978054103	FALSE
593	PF3D7_0520000.e3s1_9191	-0.699109054	-0.521933103	0.177175951	0.624138753	0.403234977	0.735926305	0.065265812	0.978203774	FALSE
594	PF3D7_0520100.e1s1_8338	0.196518408	-0.038707611	-0.235226018	0.553072147	0.779805477	0.773696438	-0.050318154	0.978054103	FALSE
595	PF3D7_0520400.e1s1_6896	0.374871266	0.336278182	-0.038593084	0.866257088	0.643735724	0.426088964	-0.010319276	0.994889069	FALSE
596	PF3D7_0521200.iso1.exon1.amp1_717	-0.411220713	-0.615043096	-0.203822383	0.461600314	0.665634082	0.519799063	-0.052178232	0.978054103	FALSE
597	PF3D7_0521300.iso1.exon3.amp1_2837	-0.698460593	-0.907619274	-0.209158681	0.384649038	0.562367208	0.448844854	-0.063276721	0.978054103	FALSE
598	PF3D7_0521300.iso1.exon3.amp2_seg2_577	-0.309673138	-0.283563776	0.026109361	0.924021963	0.492780756	0.549855447	0.008712799	0.998284684	FALSE
599	PF3D7_0521400.1o1_8497	0.169993443	0.201763556	0.031770112	0.951015742	0.866498098	1.045634719	0.005961596	0.998284684	FALSE
600	PF3D7_0521600.iso1.exon1.amp1_1810	-0.524402384	0.113890982	0.638293366	0.353468112	0.825507476	1.341346318	0.118520659	0.978054103	FALSE
601	PF3D7_0521700.e1s1_9110	-0.57630148	-0.606243095	-0.029941615	0.907701427	0.698105295	0.485589961	-0.007362549	0.998284684	FALSE
602	PF3D7_0521800.iso1.exon1.amp1_1519	-0.62153176	-0.816321854	-0.194790094	0.266018848	0.433868934	0.315893611	-0.076860118	0.978054103	FALSE
603	PF3D7_0522400.e3s3_9155	-0.280394073	-0.468656562	-0.188262489	0.613980502	0.713216548	0.734536637	-0.043846205	0.978203774	FALSE
604	PF3D7_0522400.e4s2_8874	-0.252744021	0.134785419	0.387529439	0.1736532	0.663764337	0.502890176	0.099693956	0.927851011	FALSE
605	PF3D7_0522400.e4s3_7140	-0.223146022	-0.520307744	-0.297161722	0.55575826	0.868240025	0.996793397	-0.056060973	0.978054103	FALSE
606	PF3D7_0522500.iso1.exon1.amp1_2655	-0.210188227	-0.538479737	-0.328291511	0.016655322	0.490229284	0.191596481	-0.117267695	0.61340006	FALSE
607	PF3D7_0523100.e2s1_7775	-0.542710333	-0.731001858	-0.188291524	0.113832427	0.305623052	0.201359817	-0.106070769	0.912416971	FALSE
608	PF3D7_0523400.3o3_6752	-0.421426545	-0.512959939	-0.091533393	0.671382586	0.828375658	0.343959647	-0.019326232	0.978203774	FALSE
609	PF3D7_0523800.1o1_7352	-0.604483212	-0.940293524	-0.335810312	0.044873	0.796609722	0.180258401	-0.074282759	0.806563417	FALSE
610	PF3D7_0524100.iso1.exon1.amp1_509	-0.109504034	-0.458229726	-0.348725691	0.09266167	0.607657584	0.337853901	-0.0995445	0.912416971	FALSE
611	PF3D7_0524100.iso1.exon1.amp2_798	-0.534663525	-0.548883183	-0.014219657	0.966263003	0.416813986	0.692167868	-0.005200658	0.998284684	FALSE
612	PF3D7_0524200.iso1.exon1.amp1_3223	-0.263535583	-0.424195606	-0.160660023	0.54709441	0.618655657	0.508811981	-0.044081722	0.978054103	FALSE
613	PF3D7_0524300.1o1_8762	-0.177429924	-0.801726052	-0.624296128	0.001889854	0.898792611	0.210631389	-0.122368757	0.264957515	FALSE
614	PF3D7_0524400.e1s1_7190	-0.398204777	-0.252823557	0.14538122	0.729698405	0.727065247	0.842636651	0.032708271	0.979885706	FALSE
615	PF3D7_0524500.1o1_5233	-0.173708891	0.209961351	0.383670242	0.436782764	0.897041761	0.955926112	0.070753357	0.978054103	FALSE
616	PF3D7_0524700.1o1_6961	-0.563790067	-0.832508523	-0.268718456	0.3230573	0.544468345	0.511195894	-0.082804007	0.978054103	FALSE
617	PF3D7_0524700_8580	-0.863543355	-1.181902317	-0.318358962	0.155767993	0.714869093	0.36838059	-0.077450599	0.916954512	FALSE
618	PF3D7_0524800.iso1.exon1.amp1_2188	0.351851328	1.050179707	0.698328379	0.026306024	0.691837613	0.482285923	0.173250712	0.674546004	FALSE
619	PF3D7_0525000.1o1_7931	-0.420254015	-0.40606906	0.014184956	0.940844299	0.652636531	0.330083779	0.003782221	0.998284684	FALSE
620	PF3D7_0525100.e1s1_4897	-0.392358845	-0.526334432	-0.133975587	0.691286145	0.55490041	0.676790661	-0.039192506	0.978203774	FALSE
621	PF3D7_0525200.iso1.exon1.amp2_3987	-0.438834502	-0.632141228	-0.193306726	0.375432469	0.410409449	0.416887703	-0.078363172	0.978054103	FALSE
622	PF3D7_0525300.1o1_6447	0.063651596	0.031778072	-0.031873524	0.945915013	0.855999078	0.942809045	-0.006133715	0.998284684	FALSE
623	PF3D7_0525800.e1s1_6607	0.144985622	0.917087085	0.772101462	0.14559072	0.715920675	0.95121737	0.172558226	0.916954512	FALSE
624	PF3D7_0526200.iso2.exon7.amp1_2452	0.649675378	0.681790164	0.032114786	0.963592728	1.028681185	1.436386474	0.004948664	0.998284684	FALSE
625	PF3D7_0526600.iso1.exon1.amp4_3706	2.072227566	2.567177618	0.494950052	0.184430303	1.12072834	0.629966973	0.076572844	0.939531746	FALSE
626	PF3D7_0526900.iso1.exon3.amp1_1800	-0.760712579	-0.631435573	0.129277006	0.505197719	0.458605948	0.36719664	0.047947656	0.978054103	FALSE
627	PF3D7_0527200.e2s1_8350	0.658296735	0.823638926	0.165342191	0.800184252	1.063654506	1.318915289	0.025167172	0.982733913	FALSE
628	PF3D7_0527600.6o10_4989	-0.209194028	-0.456939069	-0.247745041	0.190635515	0.867761328	0.235168607	-0.050239494	0.941095042	FALSE
629	PF3D7_0528200.e2s1_7765	-0.183554142	-0.32959225	-0.146038108	0.78148855	1.006884143	1.046735871	-0.024065586	0.982640702	FALSE
630	PF3D7_0528300.1o1_5292	-0.024831822	-0.192246083	-0.167414261	0.563143726	0.810580434	0.531160545	-0.035568707	0.978054103	FALSE
631	PF3D7_0528400.4o8_8756	-0.34442655	-0.506020857	-0.161594307	0.508609765	0.737400389	0.436407895	-0.037917784	0.978054103	FALSE
632	PF3D7_0528500.iso1.exon5.amp1_2948	-0.476267492	-0.727261833	-0.250994341	0.104042848	0.484522626	0.248909166	-0.090100483	0.912416971	FALSE
633	PF3D7_0529000.1o1_7059	-0.295616909	-0.388058768	-0.09244186	0.83122803	0.450152366	0.896060335	-0.029687283	0.989130662	FALSE
634	PF3D7_0529400.1.e2s1_8277	-0.593534397	-0.884092064	-0.290557667	0.029882478	0.658846621	0.127522943	-0.077778312	0.704121592	FALSE
635	PF3D7_0529400.1.e5s1_7458	-0.362664785	-0.073292163	0.289372622	0.541959423	0.639134339	0.950581176	0.070840059	0.978054103	FALSE
636	PF3D7_0529400.1.e7s1_6001	-0.561666528	-0.221803703	0.339862825	0.336624828	0.293355583	0.692128078	0.157269675	0.978054103	FALSE
637	PF3D7_0529700.iso1.exon2.amp1_3636	-0.546387534	-0.543932335	0.0024552	0.99495678	0.490329215	0.799179547	0.00076694	0.999164392	FALSE
638	PF3D7_0530100.2o2_9005	1.107128206	2.483977922	1.376849716	0.000166012	1.039879804	0.42923194	0.23160732	0.11641693	FALSE
639	PF3D7_0530900.iso1.exon1.amp1_818	-0.203525127	0.29810415	0.501629277	0.296267597	0.635153636	0.919756228	0.124273637	0.978054103	FALSE
640	PF3D7_0530900.iso1.exon1.amp2_1107	-0.289996008	-0.376990156	-0.086994148	0.779480726	0.417686675	0.634192113	-0.032439761	0.982640702	FALSE
641	PF3D7_0530900.iso1.exon1.amp3_3077	-0.492873079	-0.445328015	0.047545064	0.868144732	0.371553225	0.587467091	0.0197452	0.994889069	FALSE
642	PF3D7_0531100.iso1.exon1.amp2_seg2_3774	-0.501848737	-0.700924303	-0.199075566	0.590695775	0.651668595	0.732650303	-0.050183667	0.978203774	FALSE
643	PF3D7_0531400.iso1.exon1.amp2_1631	-0.358549012	-0.534240025	-0.175691013	0.537688292	0.675706894	0.541085707	-0.044225562	0.978054103	FALSE
644	PF3D7_0532100_6557	1.400177961	2.786503568	1.386325607	0.006079129	1.259829948	0.703466599	0.190842907	0.454920202	FALSE
645	PF3D7_0532300.e2s1_9209	-0.269351533	0.170057762	0.439409295	0.446489428	0.799429837	1.139746805	0.086766429	0.978054103	FALSE
646	PF3D7_0532400.e1s1_5131	-1.039643563	-0.389563229	0.650080334	0.207134955	0.741086617	0.953426336	0.14115252	0.956958241	FALSE
647	PF3D7_0532400.e2s1_5163	-0.483078855	0.128971709	0.612050564	0.20796725	0.712020143	0.899050804	0.138757743	0.956958241	FALSE
648	PF3D7_0533100.iso1.exon1.amp1_3129	-0.541311756	-0.324079651	0.217232105	0.596336918	0.328265507	0.838816436	0.086804583	0.978203774	FALSE
649	PF3D7_0533100.iso1.exon1.amp2_3418	-0.366934819	0.372259578	0.739194397	0.07589085	0.68564616	0.69946372	0.179278133	0.901686205	FALSE
650	PF3D7_0533100.iso1.exon1.amp3_1389	-0.553166381	-0.577197153	-0.024030773	0.920236138	0.344074498	0.490262619	-0.011026281	0.998284684	FALSE
651	PF3D7_0600200.iso1.exon1.amp3_1938	-0.247691198	-0.34344222	-0.095751022	0.751597238	0.794617241	0.570370326	-0.020647018	0.980535118	FALSE
652	PF3D7_0600300.iso1.exon1.amp1_1286	0.350652825	1.024586685	0.67393386	0.424009022	1.0247174	1.666857283	0.100783652	0.978054103	FALSE
653	PF3D7_0600400.iso1.exon1.amp1_3033	1.159122586	1.875320016	0.71619743	0.125189858	0.765984955	0.82180368	0.154542155	0.912416971	FALSE
654	PF3D7_0600400.iso1.exon2.amp1_1895	-0.640526216	-0.719133877	-0.078607662	0.767985203	0.621892673	0.515015857	-0.021444406	0.982640702	FALSE
655	PF3D7_0600500.iso1.exon2.amp1_130	0.849747802	1.444642874	0.594895073	0.504384537	1.203551916	1.776591928	0.077462984	0.978054103	FALSE
656	PF3D7_0600700.iso1.exon1.amp1_4469	0.553195434	1.097132812	0.543937379	0.486102864	1.104733377	1.549672383	0.077976433	0.978054103	FALSE
657	PF3D7_0601000.iso1.exon1.amp1_3293	-0.514477113	-0.576751915	-0.062274801	0.831675	0.710567451	0.563540414	-0.01491754	0.989130662	FALSE
658	PF3D7_0601200.iso1.exon2.amp1_695	0.316207788	0.696162934	0.379955147	0.51938143	1.112490468	1.151331993	0.056699252	0.978054103	FALSE
659	PF3D7_0601500.iso1.exon1.amp1_4480	-0.374102557	0.12236071	0.496463267	0.253517649	0.690623168	0.815414265	0.117270789	0.971124985	FALSE
660	PF3D7_0601700.2o2_6415	-0.649294168	-0.820848804	-0.171554636	0.382067005	0.54166195	0.354171951	-0.054549887	0.978054103	FALSE
661	PF3D7_0602000.iso1.exon1.amp2_4515	-0.385003245	-0.541243691	-0.156240446	0.519526292	0.712568118	0.43718003	-0.037879826	0.978054103	FALSE
662	PF3D7_0602100.iso1.exon1.amp1_1671	0.595415344	1.516634702	0.921219358	0.031002241	0.930994881	0.663542804	0.169618272	0.718432088	FALSE
663	PF3D7_0602100.iso1.exon1.amp2_1960	-0.247727867	0.3522949	0.600022767	0.240612665	0.58236888	0.965173739	0.157145363	0.956989945	FALSE
664	PF3D7_0602200.1o3_6695	-0.425027436	-0.109772218	0.315255218	0.619656626	0.561734691	1.299786496	0.076788241	0.978203774	FALSE
665	PF3D7_0602600.iso1.exon3.amp1_4131	0.021309175	0.191551981	0.170242807	0.716213485	0.963130484	0.920219017	0.029603611	0.978203774	FALSE
666	PF3D7_0602600.iso1.exon4.amp1_377	-0.326882673	-0.416216221	-0.089333548	0.38083763	0.337124424	0.173296716	-0.046088533	0.978054103	FALSE
667	PF3D7_0602700.iso1.exon1.amp1_1591	-0.347466345	0.687836709	1.035303054	0.068033762	0.886060502	0.943333871	0.193311008	0.867121223	FALSE
668	PF3D7_0603100.1o1_7881	-0.520350685	-0.53774982	-0.017399135	0.923102368	0.489200508	0.338641498	-0.00610708	0.998284684	FALSE
669	PF3D7_0603300.iso1.exon1.amp1_2181	-0.117984134	-0.151181175	-0.033197041	0.896755442	0.70539203	0.478437536	-0.00809008	0.998284684	FALSE
670	PF3D7_0603800.16o20_7091	-0.307558641	0.012890226	0.320448867	0.232141025	0.62287373	0.483856392	0.087698609	0.956958241	FALSE
671	PF3D7_0604000.iso1.exon1.amp1_1983	-0.347959542	-0.305425476	0.042534066	0.906432276	0.752762873	0.714743162	0.009469264	0.998284684	FALSE
672	PF3D7_0604000.iso1.exon1.amp3_760	-0.217341588	0.107474901	0.324816489	0.423217479	0.710667139	0.786525247	0.075242206	0.978054103	FALSE
673	PF3D7_0604100.iso1.exon1.amp2_3651	0.636737299	0.933072608	0.29633531	0.387019421	0.793186513	0.640291463	0.063508079	0.978054103	FALSE
674	PF3D7_0604500.iso1.exon1.amp3_3986	0.098741093	0.319393362	0.220652269	0.680295315	0.856382883	1.075628757	0.041627731	0.978203774	FALSE
675	PF3D7_0605000.iso1.exon1.amp1_1561	-0.695034444	-0.629007614	0.06602683	0.860436254	0.596258944	0.761169362	0.017842283	0.993519608	FALSE
676	PF3D7_0605500.iso1.exon2.amp1_4494	-0.482537486	-0.554290913	-0.071753427	0.798899877	0.618450821	0.550444721	-0.019564083	0.982733913	FALSE
677	PF3D7_0605600.iso1.exon1.amp1_3384	-0.853576616	-0.27252177	0.581054846	0.255708662	0.689387602	0.965930334	0.133513207	0.97539016	FALSE
678	PF3D7_0605600.iso1.exon1.amp2_2481	-0.797124768	-0.84896847	-0.051843702	0.909149841	0.763767583	0.917821372	-0.011043958	0.998284684	FALSE
679	PF3D7_0605600.iso1.exon4.amp1_4428	-0.274934798	-0.25626009	0.018674708	0.943255607	0.599368246	0.511211609	0.005273342	0.998284684	FALSE
680	PF3D7_0606000.iso1.exon1.amp2_2795	-0.683820026	-0.419648502	0.264171524	0.276148811	0.74768186	0.416386942	0.061282284	0.978054103	FALSE
681	PF3D7_0606100.iso1.exon4.amp1_4473	-0.427403174	0.87931681	1.306719984	0.00992445	0.611906724	0.684387229	0.351054538	0.496931373	FALSE
682	PF3D7_0606500.iso1.exon5.amp1_1589	-0.164660451	-0.196401881	-0.03174143	0.929530484	0.689548013	0.716087526	-0.007638814	0.998284684	FALSE
683	PF3D7_0606600.iso1.exon2.amp1_2254	-0.657222181	-0.148967978	0.508254203	0.393522123	0.594712726	1.177331815	0.123772032	0.978054103	FALSE
684	PF3D7_0606700.iso1.exon1.amp1_3408	-0.347053227	-0.49999582	-0.152942594	0.490777101	0.658644476	0.397659839	-0.040144577	0.978054103	FALSE
685	PF3D7_0606800.1o1_4981	0.230275239	0.887669106	0.657393867	0.102878703	0.850701506	0.689541517	0.131321157	0.912416971	FALSE
686	PF3D7_0607300.2o2_5577	-0.645595824	-0.612472437	0.033123387	0.931366496	0.688203021	0.772940278	0.007907686	0.998284684	FALSE
687	PF3D7_0607600.1o5_6489	0.0499518	-0.184848146	-0.234799946	0.390229009	0.696398908	0.502559908	-0.057752406	0.978054103	FALSE
688	PF3D7_0607700.iso1.exon1.amp2_seg1_2869	-0.609341269	-0.909036629	-0.29969536	0.132260581	0.548201969	0.336172463	-0.094447368	0.912416971	FALSE
689	PF3D7_0608100.iso1.exon1.amp1_4297	-0.719361585	0.11292087	0.832282456	0.026462218	0.76303413	0.575188552	0.18631634	0.674546004	FALSE
690	PF3D7_0608100.iso1.exon1.amp2_2496	-0.358587582	0.932042487	1.290630069	0.008964484	1.021113857	0.697647342	0.217189169	0.488837897	FALSE
691	PF3D7_0608310.iso1.exon3.amp1_440	-0.656886019	-0.700118086	-0.043232067	0.86097011	0.528908711	0.485100175	-0.013744836	0.993519608	FALSE
692	PF3D7_0608400.iso1.exon2.amp1_1521	-0.185007966	0.071336688	0.256344654	0.643632636	0.665028251	1.126787369	0.058455222	0.978203774	FALSE
693	PF3D7_0608500.2o2_7844	-0.450510919	-0.540485041	-0.089974122	0.482204171	0.58382111	0.166333928	-0.027106327	0.978054103	FALSE
694	PF3D7_0609000.iso1.exon1.amp1_3985	-0.154141388	-0.230752268	-0.07661088	0.800221354	0.822046461	0.567160944	-0.016005464	0.982733913	FALSE
695	PF3D7_0609000.iso1.exon1.amp2_4274	0.910411295	1.37274738	0.462336085	0.48630122	1.090838502	1.306170084	0.068996136	0.978054103	FALSE
696	PF3D7_0609300.iso1.exon1.amp1_745	-0.417736284	-0.445765666	-0.028029382	0.939032487	0.524526611	0.748928921	-0.00843292	0.998284684	FALSE
697	PF3D7_0609900.iso1.exon1.amp2_2850	-0.70448481	-0.55636819	0.14811662	0.604763627	0.624885036	0.553603096	0.039985824	0.978203774	FALSE
698	PF3D7_0610000.iso1.exon2.amp1_2117	-0.478839217	-0.648341703	-0.169502486	0.395514524	0.521043125	0.36531376	-0.055818534	0.978054103	FALSE
699	PF3D7_0610200.1o1_5636	-0.501709675	-0.047417088	0.454292587	0.5201864	0.810445877	1.42033477	0.084232711	0.978054103	FALSE
700	PF3D7_0611800.iso1.exon5.amp1_seg1_1151	-0.398607072	-0.552847276	-0.154240204	0.237799758	0.427815829	0.217628085	-0.062726784	0.956958241	FALSE
701	PF3D7_0611800.iso1.exon5.amp3_508	0.096008105	-0.070993575	-0.16700168	0.557882777	0.966981701	0.487001841	-0.030057283	0.978054103	FALSE
702	PF3D7_0611900.iso1.exon1.amp1_2690	-0.416043384	-0.57176566	-0.155722275	0.435458851	0.612054549	0.351863424	-0.044075287	0.978054103	FALSE
703	PF3D7_0612700.1o1_6423	-0.643644365	-0.518546664	0.125097701	0.722884951	0.417927031	0.721841954	0.045160038	0.978466981	FALSE
704	PF3D7_0613300.iso1.exon3.amp1_635	-0.48829878	-0.675037303	-0.186738523	0.158613713	0.443676818	0.213835207	-0.073346084	0.916954512	FALSE
705	PF3D7_0613300.iso1.exon5.amp1_2341	-0.490965801	-0.703593806	-0.212628005	0.122277321	0.473403863	0.21654978	-0.078380333	0.912416971	FALSE
706	PF3D7_0613900.iso1.exon1.amp2_2265	-0.492513477	-0.615360292	-0.122846815	0.688212247	0.939453119	0.549892601	-0.022636418	0.978203774	FALSE
707	PF3D7_0614000.iso1.exon1.amp1_157	-0.493230884	-0.66913896	-0.175908076	0.437040134	0.394452307	0.440070689	-0.073335704	0.978054103	FALSE
708	PF3D7_0614400.1o1_8430	-0.323793022	-0.083027541	0.240765481	0.656012769	1.347715003	1.025830729	0.030495692	0.978203774	FALSE
709	PF3D7_0614800.iso1.exon1.amp1_433	-0.590975057	-1.018577404	-0.427602346	0.091612459	0.873280117	0.39252221	-0.085486152	0.912416971	FALSE
710	PF3D7_0615100.1o1_7590	-0.207623217	-0.027192341	0.180430877	0.550789427	0.476764476	0.601234574	0.061102755	0.978054103	FALSE
711	PF3D7_0615600.5o8_7086	-0.502570146	-0.165176776	0.33739337	0.614938907	0.427335758	1.378346894	0.092021085	0.978203774	FALSE
712	PF3D7_0615800.2o3_6521	-0.44437106	-0.505651165	-0.061280105	0.890204899	0.966642064	0.870888597	-0.010678101	0.997630034	FALSE
713	PF3D7_0616000.1o3_5009	-0.585894576	-0.475178144	0.110716433	0.582445902	0.590649266	0.36493311	0.032373178	0.978203774	FALSE
714	PF3D7_0616300.iso1.exon1.amp1_967	-0.489545468	0.530805389	1.020350856	0.135040315	1.013134865	1.21287501	0.163954543	0.912416971	FALSE
715	PF3D7_0616800.iso1.exon1.amp1_2475	-0.157474213	-0.301067285	-0.143593072	0.470415713	0.653154927	0.342650507	-0.038211815	0.978054103	FALSE
716	PF3D7_0617000.1o1_8750	-0.533014297	-0.784594625	-0.251580328	0.385369611	0.497422789	0.559174314	-0.083086187	0.978054103	FALSE
717	PF3D7_0617400.s3 (renamed)_7396	0.19198387	0.756388534	0.564404664	0.419640539	0.961336207	1.375164795	0.092615417	0.978054103	FALSE
718	PF3D7_0617600.iso1.exon1.amp1_3292	1.057234358	1.131007256	0.073772898	0.878560043	1.453267223	0.878637081	0.008775554	0.996647775	FALSE
719	PF3D7_0617700.iso1.exon1.amp1_3596	0.604293824	0.592862883	-0.011430942	0.978129759	1.039370587	0.799469017	-0.001876046	0.998284684	FALSE
720	PF3D7_0618500.1o1_6121	-0.631175828	-0.178420165	0.452755663	0.481657039	0.42219052	1.300172744	0.128235052	0.978054103	FALSE
721	PF3D7_0618700.1o2_6708	0.851088036	1.07768201	0.226593974	0.750872924	1.277300243	1.426452198	0.029168947	0.980535118	FALSE
722	PF3D7_0618900.2o10_5031	-0.537291312	-0.226296807	0.310994506	0.459303261	0.665630025	0.825462754	0.07564206	0.978054103	FALSE
723	PF3D7_0618900.iso2.exon2.amp1_2167	0.033033738	0.597643455	0.564609716	0.215973224	0.713076305	0.844718741	0.129104706	0.956958241	FALSE
724	PF3D7_0619000.1.12o14_6224	-0.697112485	-0.942765632	-0.245653147	0.441967471	0.734674894	0.6027433	-0.056768859	0.978054103	FALSE
725	PF3D7_0619000.1.e12_5382	-0.589885262	-0.851418208	-0.261532947	0.209994806	0.533213241	0.368374838	-0.084230055	0.956958241	FALSE
726	PF3D7_0619000.1.s1 (renamed)_5662	-0.75092212	-0.630844594	0.120077526	0.702093511	0.516003561	0.630225701	0.037766489	0.978203774	FALSE
727	PF3D7_0619000.iso2.exon13.amp1_3564	-0.429169198	-0.674055467	-0.244886268	0.24949643	0.522574467	0.382425548	-0.0801993	0.968457025	FALSE
728	PF3D7_0619400.iso1.exon1.amp1_727	-0.436725159	-0.381273101	0.055452057	0.833423786	0.626873897	0.50908282	0.01503007	0.989130662	FALSE
729	PF3D7_0619400.iso1.exon2.amp1_2684	-0.313533255	-0.034248496	0.279284759	0.674437783	0.600099294	1.366364552	0.06408645	0.978203774	FALSE
730	PF3D7_0619700.iso1.exon2.amp1_2417	-0.44934045	-0.607722646	-0.158382196	0.480973476	0.532765864	0.423979318	-0.050588441	0.978054103	FALSE
731	PF3D7_0619900.iso1.exon1.amp1_2419	-0.759929251	-0.187900743	0.572028508	0.408062521	0.93121724	1.357956677	0.096517602	0.978054103	FALSE
732	PF3D7_0620000.1o1_5588	-0.103669497	0.061551672	0.165221169	0.545397047	0.71362753	0.509153892	0.039684757	0.978054103	FALSE
733	PF3D7_0620100.2o2_6690	-0.446782303	-0.400190891	0.046591412	0.854800695	0.358049363	0.519937612	0.020463745	0.993519608	FALSE
734	PF3D7_0620200.1o1_6128	0.267223234	0.230896616	-0.036326617	0.934415008	0.984339649	0.863459925	-0.006231078	0.998284684	FALSE
735	PF3D7_0620400.1o1_7613	0.579795988	1.875461998	1.29566601	0.219966539	1.259373991	1.975220067	0.15905382	0.956958241	FALSE
736	PF3D7_0620600.1o1_5842	0.097564216	-0.543744946	-0.641309162	0.043902842	0.891227583	0.498550456	-0.12478773	0.8048083	FALSE
737	PF3D7_0621200.iso1.exon1.amp1_1855	-0.093029789	-0.221240451	-0.128210662	0.429182784	0.727506062	0.215469594	-0.030984499	0.978054103	FALSE
738	PF3D7_0621400.1o1_8784	-0.025992661	-0.091490487	-0.065497826	0.859827935	0.634620078	0.747355088	-0.016843152	0.993519608	FALSE
739	PF3D7_0621900.1o1_7648	-0.466913631	-0.162973454	0.303940177	0.63548908	0.895818914	1.294241117	0.05341336	0.978203774	FALSE
740	PF3D7_0622000.iso1.exon1.amp1_2087	-0.19262669	-0.438711169	-0.246084479	0.096968638	0.448335743	0.240429761	-0.095331583	0.912416971	FALSE
741	PF3D7_0622000.iso1.exon3.amp1_2970	0.188461966	0.698379509	0.509917544	0.505491574	1.032433468	1.527129097	0.077368746	0.978054103	FALSE
742	PF3D7_0622100.iso1.exon1.amp1_seg1_3159	-0.540614773	-0.7629269	-0.222312127	0.097843777	0.375498016	0.221642569	-0.102452749	0.912416971	FALSE
743	PF3D7_0622100.iso1.exon1.amp2_seg2_2303	-0.491600284	-0.364547906	0.127052378	0.650750887	0.517823119	0.555860517	0.040551417	0.978203774	FALSE
744	PF3D7_0622800.s1 (renamed)_4799	0.625176989	0.641949388	0.016772399	0.975392941	0.993260275	1.091064097	0.002782606	0.998284684	FALSE
745	PF3D7_0622800.s2 (renamed)_5666	-0.411074314	0.120491315	0.531565629	0.141293254	0.620737218	0.64174612	0.142181583	0.916954512	FALSE
746	PF3D7_0623300.iso1.exon4.amp1_75	-0.277803032	-0.510025969	-0.232222936	0.047789646	0.211633407	0.188896843	-0.18498292	0.820283309	FALSE
747	PF3D7_0623400.1o1_5006	9.93E-05	0.118545875	0.118446563	0.708807353	0.828640585	0.597606127	0.024485196	0.978203774	FALSE
748	PF3D7_0623700.iso1.exon1.amp2_4528	-0.253576334	-0.370631863	-0.117055529	0.628479821	0.657947794	0.449305741	-0.030571919	0.978203774	FALSE
749	PF3D7_0623800.iso1.exon1.amp3_470	-0.472588193	-0.692094919	-0.219506726	0.383718939	0.664523426	0.459687923	-0.056721455	0.978054103	FALSE
750	PF3D7_0623900.1o1_5269	0.068013159	0.389016544	0.321003386	0.709520205	1.231776314	1.746668554	0.041182674	0.978203774	FALSE
751	PF3D7_0624500.iso1.exon1.amp1_1536	-0.36969831	-0.561409025	-0.191710716	0.01090196	0.299805051	0.097196375	-0.112304752	0.520181422	FALSE
752	PF3D7_0624600.iso1.exon1.amp2_2263	-0.365443786	-0.50238855	-0.136944764	0.473129342	0.542298227	0.345838134	-0.043547637	0.978054103	FALSE
753	PF3D7_0624900.iso1.exon8.amp1_2391	-0.489095385	-0.427772339	0.061323046	0.813424442	0.419547165	0.525201771	0.023627799	0.985244983	FALSE
754	PF3D7_0625000.iso2.exon1.amp1_1527	0.132561794	0.144000913	0.011439119	0.97618246	0.724327449	0.766086349	0.002614947	0.998284684	FALSE
755	PF3D7_0625400.1o1_5288	-0.012291989	0.053849258	0.066141247	0.776345586	0.400717119	0.467511218	0.02697365	0.982640702	FALSE
756	PF3D7_0625500.1o1_7006	-0.505026595	-0.964410542	-0.459383947	0.001147849	0.599603962	0.156239705	-0.134865585	0.241372595	FALSE
757	PF3D7_0625600.1o1_7626	-0.406142403	0.953982461	1.360124864	0.09058268	0.585618335	1.372901523	0.316104756	0.912416971	FALSE
758	PF3D7_0626100.iso1.exon2.amp1_4098	-0.468051728	-0.839764522	-0.371712795	0.052373371	0.449680585	0.308990553	-0.141996127	0.820283309	FALSE
759	PF3D7_0626600.1o1_6969	-0.151780069	-0.512766281	-0.360986212	0.257813006	0.612847874	0.591803242	-0.098542006	0.976799056	FALSE
760	PF3D7_0626800.iso1.exon1.amp1_2938	-0.378286323	-0.491041042	-0.112754719	0.731934373	0.607011033	0.655345452	-0.030678056	0.980114074	FALSE
761	PF3D7_0626800.iso1.exon2.amp1_1841	-0.129625426	0.438955859	0.568581285	0.476570427	0.987370232	1.592107932	0.088435814	0.978054103	FALSE
762	PF3D7_0626800.iso1.exon3.amp1_689	0.318071077	0.552490779	0.234419703	0.593673464	0.83082109	0.864131303	0.046813465	0.978203774	FALSE
763	PF3D7_0626900.1o1_4986	0.619818324	0.714922124	0.095103799	0.882175976	0.831675591	1.316794015	0.017639153	0.996751596	FALSE
764	PF3D7_0627000.1o1_6672	-0.595164267	-0.725791113	-0.130626846	0.283810374	0.556692922	0.154853378	-0.04128113	0.978054103	FALSE
765	PF3D7_0627100.iso1.exon1.amp1_4595	0.089691435	0.038717705	-0.05097373	0.923882621	0.985486745	1.068784038	-0.008537572	0.998284684	FALSE
766	PF3D7_0627400.1o1_5247	-0.094910185	-0.323559995	-0.22864981	0.333367453	0.706923107	0.413981632	-0.055989826	0.978054103	FALSE
767	PF3D7_0628000.1o1_7263	-0.178018503	-0.365493676	-0.187475173	0.438705108	0.5955093	0.451352543	-0.053755388	0.978054103	FALSE
768	PF3D7_0628100.iso1.exon1.amp10_2250	-0.503352282	-0.678912808	-0.175560526	0.223814721	0.46109801	0.241808948	-0.066178848	0.956958241	FALSE
769	PF3D7_0628100.iso1.exon1.amp11_1613	-0.506871208	-0.774795634	-0.267924426	0.142628281	0.464595474	0.314397419	-0.099145967	0.916954512	FALSE
770	PF3D7_0628100.iso1.exon1.amp6_2244	-0.649296205	-0.681461601	-0.032165396	0.844248436	0.730720399	0.223170942	-0.007736517	0.993519608	FALSE
771	PF3D7_0628100.iso1.exon1.amp7_1383	-0.371891764	-0.062582644	0.30930912	0.557350604	0.663071811	1.061017773	0.071772818	0.978054103	FALSE
772	PF3D7_0628100.iso1.exon1.amp9_1961	0.754861554	0.897370923	0.142509369	0.748349296	0.93671856	0.871403534	0.025547885	0.980535118	FALSE
773	PF3D7_0628200.s1_6574	-0.421759031	-0.586979469	-0.165220438	0.269390357	0.52952279	0.242013907	-0.05445114	0.978054103	FALSE
774	PF3D7_0628200.s2 (renamed)_6863	0.305836526	0.480290651	0.174454125	0.590814184	0.714214395	0.626216387	0.04124331	0.978203774	FALSE
775	PF3D7_0628600.iso1.exon3.amp1_4371	-0.583801184	-0.862976019	-0.279174836	0.008583975	0.346469695	0.147833646	-0.140847672	0.488837897	FALSE
776	PF3D7_0629000.iso1.exon1.amp1_120	-0.177218114	-0.436494565	-0.259276451	0.126738548	0.714970471	0.232795553	-0.063685598	0.912416971	FALSE
777	PF3D7_0629300.1o1_7935	-0.329451147	0.913076391	1.242527538	0.147191631	0.768603544	1.545257057	0.232929378	0.916954512	FALSE
778	PF3D7_0629500.1o2_8488	-0.924859224	-0.661470753	0.263388471	0.66667874	0.65131251	1.250823131	0.059143056	0.978203774	FALSE
779	PF3D7_0629600.iso1.exon2.amp1_3286	-0.630603293	-0.404244333	0.22635896	0.510306295	0.548852831	0.67969351	0.066785647	0.978054103	FALSE
780	PF3D7_0629700.s3 (renamed)_7149	-0.467239168	-0.548399747	-0.081160579	0.738962666	0.648391733	0.457520599	-0.021469491	0.980535118	FALSE
781	PF3D7_0629700.s5 (renamed)_7727	0.23881706	0.178744373	-0.060072687	0.904188221	1.12851482	0.973555364	-0.009000757	0.998284684	FALSE
782	PF3D7_0629900.iso1.exon1.amp1_3279	-1.303838957	-1.215748237	0.08809072	0.78669385	0.810869756	0.621900985	0.018535208	0.982733913	FALSE
783	PF3D7_0630300.iso1.exon2.amp3_4257	-0.27735843	-0.416123858	-0.138765428	0.542397029	0.51986448	0.43527894	-0.045245466	0.978054103	FALSE
784	PF3D7_0630600.2o2_8237	0.730965367	1.771000179	1.040034812	0.022629897	0.93553783	0.691243956	0.190141434	0.666326899	FALSE
785	PF3D7_0631000.iso1.exon1.amp1_2426	-0.62822448	-0.640773006	-0.012548526	0.963022091	0.510707553	0.541250132	-0.004067403	0.998284684	FALSE
786	PF3D7_0631100.iso1.exon2.amp1_1011	-0.015870538	0.288308616	0.304179154	0.288965822	0.675149074	0.524570988	0.076799354	0.978054103	FALSE
787	PF3D7_0631400.iso1.exon1.amp1_1562	0.37016189	0.523093801	0.152931911	0.791391773	1.162926152	1.143295128	0.021958564	0.982733913	FALSE
788	PF3D7_0631800.iso1.exon2.amp1_3318	0.523845824	0.625369108	0.101523284	0.87142016	0.836392472	1.285092563	0.018855155	0.995705839	FALSE
789	PF3D7_0631900.iso1.exon2.amp1_3298	0.632517711	0.681519626	0.049001915	0.951676705	1.350625434	1.635282539	0.00589612	0.998284684	FALSE
790	PF3D7_0632000.iso1.exon2.amp1_3020	0.029275643	0.613825019	0.584549377	0.369216785	0.927031214	1.265596913	0.100386302	0.978054103	FALSE
791	PF3D7_0632100.iso1.exon1.amp1_705	-0.558574433	-0.063635178	0.494939255	0.327070024	0.627481546	0.977342771	0.122141137	0.978054103	FALSE
792	PF3D7_0632200.iso1.exon1.amp1_3015	0.568478118	1.486799481	0.918321363	0.340094375	1.025995101	1.876910079	0.132857976	0.978054103	FALSE
793	PF3D7_0632300.iso1.exon2.amp1_423	0.093769572	0.47296134	0.379191768	0.362050944	0.851147972	0.786667885	0.074859779	0.978054103	FALSE
794	PF3D7_0632400.iso1.exon2.amp1_3304	0.30283175	0.989318119	0.68648637	0.414095681	1.012964347	1.659585391	0.103666219	0.978054103	FALSE
795	PF3D7_0632500.iso1.exon1.amp1_3326	0.599865771	2.150497306	1.550631535	0.036210431	1.371603445	1.16356156	0.191425818	0.752277124	FALSE
796	PF3D7_0632500.iso1.exon2.amp1_1064	-0.264630999	-0.512458799	-0.2478278	0.110566038	0.579850527	0.233195879	-0.074801907	0.912416971	FALSE
797	PF3D7_0632500.iso1.exon2.amp3_492	-0.44185438	-0.501835177	-0.059980797	0.849042732	0.577452936	0.630794169	-0.017128937	0.993519608	FALSE
798	PF3D7_0632500.iso1.exon2.amp4_seg2_4605	-0.344663704	-0.696856053	-0.35219235	0.105964203	0.595268047	0.362970876	-0.102241621	0.912416971	FALSE
799	PF3D7_0632700.iso1.exon2.amp1_2437	0.667226994	1.005117548	0.337890553	0.62023805	0.98728333	1.371939745	0.05430094	0.978203774	FALSE
800	PF3D7_0632800.iso1.exon1.amp1_4482	-0.214074189	0.347534475	0.561608664	0.472040508	1.098156949	1.546975699	0.080924032	0.978054103	FALSE
801	PF3D7_0700100.iso1.exon3.amp1_1301	1.107223627	2.147062138	1.039838511	0.115514753	1.216909427	1.149427005	0.143276128	0.912416971	FALSE
802	PF3D7_0700200.iso1.exon3.amp1_994	0.077910224	0.221034521	0.143124296	0.796357601	0.806958768	1.128054719	0.028108001	0.982733913	FALSE
803	PF3D7_0700300.iso1.exon3.amp1_3589	-0.241785464	-0.361296802	-0.119511337	0.694861127	0.514118603	0.610095451	-0.037893278	0.978203774	FALSE
804	PF3D7_0700400.iso1.exon3.amp1_4165	0.722816009	1.347461946	0.624645938	0.44265476	1.409967322	1.584060154	0.072784349	0.978054103	FALSE
805	PF3D7_0700500.iso1.exon3.amp1_2741	0.365109394	0.837534745	0.472425351	0.500328443	1.133973968	1.382705536	0.067630125	0.978054103	FALSE
806	PF3D7_0701000.1o1_5806	0.98863929	2.3020749	1.31343561	0.085427096	1.126062768	1.298143238	0.190940914	0.912416971	FALSE
807	PF3D7_0701100.iso1.exon3.amp1_2151	0.889245929	1.204517336	0.315271407	0.669490402	1.064462357	1.492307574	0.046911186	0.978203774	FALSE
808	PF3D7_0701600.iso1.exon2.amp1_4435	-0.143774289	0.352615377	0.496389666	0.49477851	0.984150818	1.447561892	0.079106116	0.978054103	FALSE
809	PF3D7_0701800.iso1.exon1.amp1_3301	0.377418191	0.318861015	-0.058557175	0.884515124	0.956612287	0.779643009	-0.010397984	0.996751596	FALSE
810	PF3D7_0701900.e2s1_9111	-0.198642814	0.040176384	0.238819198	0.218769831	0.672788565	0.314231745	0.061911848	0.956958241	FALSE
811	PF3D7_0702200.1o1_5873	-0.218697362	-0.032935292	0.18576207	0.718694522	0.496648337	1.061597566	0.05275062	0.978203774	FALSE
812	PF3D7_0702300.2o2_7331	0.16674065	0.497905386	0.331164736	0.557803702	1.360891999	1.071447297	0.041441961	0.978054103	FALSE
813	PF3D7_0702300.e2_6828	-0.852711502	-0.756212635	0.096498867	0.705924876	0.624510048	0.488765993	0.026326163	0.978203774	FALSE
814	PF3D7_0702400.e1s1_8040	0.008627383	0.437513637	0.428886254	0.602158094	1.189165702	1.652714038	0.057221703	0.978203774	FALSE
815	PF3D7_0702500.e1s1_8598	-0.515564992	-0.622104805	-0.106539812	0.710674003	0.543866124	0.569601918	-0.032474592	0.978203774	FALSE
816	PF3D7_0702600.iso1.exon1.amp1_3842	-0.219652909	-0.330288631	-0.110635722	0.760808658	0.511252824	0.739417941	-0.034060149	0.982094362	FALSE
817	PF3D7_0703100.1o1_5246	0.136476842	0.384245859	0.247769016	0.620237183	1.04310386	0.974519766	0.039871129	0.978203774	FALSE
818	PF3D7_0703200.iso1.exon1.amp1_4307	-0.434941762	-0.353732021	0.081209741	0.825949334	0.739804139	0.731516229	0.018318012	0.989130662	FALSE
819	PF3D7_0703300.iso1.exon1.amp1_3572	-0.911948447	-0.72143555	0.190512897	0.506991703	0.630833086	0.549745566	0.051020147	0.978054103	FALSE
820	PF3D7_0703500.e2s2_7503	1.525002275	1.93191265	0.406910375	0.131950131	1.162892575	0.361809005	0.061485462	0.912416971	FALSE
821	PF3D7_0703700.e1s1_8629	0.09419953	0.867128518	0.772928988	0.266719409	0.879968179	1.322497781	0.13711872	0.978054103	FALSE
822	PF3D7_0704000.iso1.exon1.amp1_seg1_3736	-0.235384838	-0.499877859	-0.264493021	0.179693215	0.648224053	0.322781143	-0.071037234	0.938661894	FALSE
823	PF3D7_0704200.iso1.exon1.amp1_252	-0.35503431	-0.296381481	0.05865283	0.80048654	0.507193071	0.453956601	0.019490249	0.982733913	FALSE
824	PF3D7_0704200.iso1.exon1.amp2_769	-0.060517093	0.185941609	0.246458702	0.55336377	0.490555972	0.838578784	0.076009949	0.978054103	FALSE
825	PF3D7_0704300.s1_6860	-0.625140846	-0.519807046	0.1053338	0.486122574	0.437324535	0.272979267	0.041577898	0.978054103	FALSE
826	PF3D7_0704500.iso1.exon1.amp2_178	-0.153663838	-0.191485615	-0.037821777	0.880039548	0.788528648	0.448632932	-0.008312586	0.996647775	FALSE
827	PF3D7_0704600.iso1.exon5.amp3_seg1_283	0.182985295	0.103855993	-0.079129303	0.7597797	0.800535589	0.464861754	-0.017116565	0.982094362	FALSE
828	PF3D7_0704800.iso1.exon1.amp1_3430	-0.306704135	0.142212328	0.448916463	0.392784845	0.89707367	1.015275684	0.082132042	0.978054103	FALSE
829	PF3D7_0704800.iso1.exon1.amp2_1629	0.096648712	0.934028058	0.837379346	0.156308313	0.953021319	1.061081548	0.14453144	0.916954512	FALSE
830	PF3D7_0704900.iso1.exon1.amp1_3311	-0.508536197	-0.413968131	0.094568066	0.792806461	0.664166072	0.718815537	0.023508316	0.982733913	FALSE
831	PF3D7_0705000.e1s1_7991	0.006931669	-0.306205571	-0.313137241	0.271911477	0.794464445	0.502783656	-0.067995071	0.978054103	FALSE
832	PF3D7_0705000.e1s2_6251	-0.326761174	-0.122719874	0.2040413	0.625418355	1.124309728	0.778252012	0.031162052	0.978203774	FALSE
833	PF3D7_0705500.iso1.exon2.amp2_3383	0.810909087	0.944040195	0.133131109	0.698924346	0.901023977	0.64795873	0.025314298	0.978203774	FALSE
834	PF3D7_0705500.iso1.exon2.amp3_1354	-0.241030091	-0.013573774	0.227456317	0.417524011	0.669278436	0.52434999	0.05789802	0.978054103	FALSE
835	PF3D7_0705600.iso1.exon1.amp2_4245	-0.529506104	0.414312661	0.943818766	0.173723888	0.517589663	1.274086426	0.24315896	0.927851011	FALSE
836	PF3D7_0706500.iso1.exon1.amp1_3144	-0.685581674	-1.013652108	-0.328070433	0.145127668	0.713879232	0.368981812	-0.079916114	0.916954512	FALSE
837	PF3D7_0706700.1o1_8234	-0.160037888	-0.197030248	-0.036992361	0.861690439	0.586294197	0.396662992	-0.010847745	0.993519608	FALSE
838	PF3D7_0707200.iso1.exon1.amp1_1982	-0.696091602	-0.351988084	0.344103519	0.42355333	0.58019113	0.846772928	0.093171274	0.978054103	FALSE
839	PF3D7_0707300.2o5_6209	-0.467773811	-0.770949839	-0.303176028	0.112699956	0.684686264	0.293899509	-0.0773898	0.912416971	FALSE
840	PF3D7_0707400.iso1.exon1.amp1_1310	0.768567915	1.279660588	0.511092673	0.439444928	1.045650232	1.294567616	0.079154151	0.978054103	FALSE
841	PF3D7_0707500.iso1.exon1.amp2_467	-0.443830386	-0.536798997	-0.092968611	0.803001373	0.741818484	0.738171522	-0.020898938	0.983296632	FALSE
842	PF3D7_0707700.1o1_5353	0.296407869	0.260506424	-0.035901445	0.912854482	1.043137521	0.585054877	-0.005967887	0.998284684	FALSE
843	PF3D7_0708000.e1s1_9235	-0.494124193	-0.718620702	-0.224496509	0.358910345	0.780536352	0.420879193	-0.049944699	0.978054103	FALSE
844	PF3D7_0708000.e2s1_8905	-0.481384485	-0.692705375	-0.21132089	0.053867313	0.324599685	0.172266671	-0.113111292	0.820891007	FALSE
845	PF3D7_0708400.e1_5679	-0.560956993	-0.208451367	0.352505626	0.416906687	0.326320695	0.866303281	0.139237306	0.978054103	FALSE
846	PF3D7_0708400.e2_6536	-0.70172351	-0.867558677	-0.165835167	0.251785011	0.657975537	0.184377724	-0.04433747	0.968457025	FALSE
847	PF3D7_0709000.e3s1_5972	-0.596978799	-0.895472119	-0.298493321	0.024480096	0.557115533	0.169471946	-0.094170975	0.672962647	FALSE
848	PF3D7_0709100.e1s1_4890	-0.728311099	-0.610558249	0.11775285	0.860422198	0.790417064	1.378869553	0.022414921	0.993519608	FALSE
849	PF3D7_0709300.iso1.exon1.amp3_2493	-0.354065269	-0.103146193	0.250919076	0.47567419	0.695714403	0.679810547	0.060262157	0.978054103	FALSE
850	PF3D7_0709400.iso1.exon2.amp1_2171	0.444613229	1.167632825	0.723019596	0.219143726	0.89418071	1.091864329	0.131231494	0.956958241	FALSE
851	PF3D7_0709700.e1s1_7479	-0.0627812	0.004270441	0.067051642	0.867938101	0.915857984	0.785531375	0.012385219	0.994889069	FALSE
852	PF3D7_0709900.3o3_8531	-0.333461129	-0.653309844	-0.319848715	0.04879986	0.671541637	0.217017605	-0.083652767	0.820283309	FALSE
853	PF3D7_0709900.e1s2_8563	-0.622255249	-0.518646341	0.103608908	0.818328673	0.679385336	0.9163084	0.024334118	0.986497678	FALSE
854	PF3D7_0709900.e2_7429	-0.609364562	0.700922326	1.310286888	0.098050537	0.553643211	1.36524608	0.315349754	0.912416971	FALSE
855	PF3D7_0709900.e3_5674	-0.002949103	-0.2743351	-0.271385997	0.278776645	0.77485781	0.429866243	-0.060756572	0.978054103	FALSE
856	PF3D7_0710200.iso1.exon1.amp2_seg1_3742	-0.507014422	-0.886166359	-0.379151937	0.04548124	0.471319744	0.301420729	-0.138706137	0.811348251	FALSE
857	PF3D7_0710200.iso1.exon1.amp3_3649	-0.537380744	0.237730931	0.775111675	0.139695327	0.49058648	0.940638731	0.231188121	0.916954512	FALSE
858	PF3D7_0710300.iso1.exon2.amp1_2630	-0.795648062	-1.084165718	-0.288517655	0.011854995	0.467028166	0.145864333	-0.108548193	0.536151713	FALSE
859	PF3D7_0710400_9160	0.345007298	0.213974972	-0.131032326	0.85518002	1.189040647	1.450318248	-0.017888333	0.993519608	FALSE
860	PF3D7_0710500.iso1.exon5.amp1_1229	-0.583564297	-0.573059237	0.010505059	0.964517413	0.353384276	0.4814176	0.004734495	0.998284684	FALSE
861	PF3D7_0711000.e1s1_7491	-0.102222476	-0.657024503	-0.554802027	0.084692398	0.770298319	0.537019368	-0.123622307	0.912416971	FALSE
862	PF3D7_0711000.e1s2_8942	-0.891423535	-0.859044059	0.032379476	0.936205489	0.624962192	0.822764881	0.008303452	0.998284684	FALSE
863	PF3D7_0711100.iso1.exon1.amp1_1552	-0.023022758	0.084933027	0.107955785	0.775208274	0.984577216	0.71489705	0.018774248	0.982640702	FALSE
864	PF3D7_0711200.iso1.exon1.amp1_2331	-0.562216613	-0.526660763	0.03555585	0.925290107	0.586656694	0.77097621	0.009716406	0.998284684	FALSE
865	PF3D7_0711300.iso1.exon1.amp1_3846	-0.46165859	-0.320507392	0.141151198	0.642834036	0.577960339	0.600772956	0.040523006	0.978203774	FALSE
866	PF3D7_0711700.e2s1_5452	1.322960327	2.558472587	1.23551226	0.001669613	1.031790063	0.510099381	0.208519087	0.259773383	FALSE
867	PF3D7_0712000.iso1.exon1.amp1_145	1.136444769	2.113357553	0.976912784	0.069890602	1.043154804	0.896291586	0.158403547	0.867138269	FALSE
868	PF3D7_0712300.iso1.exon1.amp1_3615	0.583479601	1.345664326	0.762184725	0.224940398	0.973884097	1.167219038	0.127385113	0.956958241	FALSE
869	PF3D7_0712400.iso1.exon1.amp1_1004	0.331427966	0.836889943	0.505461977	0.504517069	1.003464174	1.511303775	0.078597264	0.978054103	FALSE
870	PF3D7_0712400.iso1.exon2.amp2_2529	-0.00778702	0.853424124	0.861211144	0.26908819	0.740454628	1.491224554	0.167486978	0.978054103	FALSE
871	PF3D7_0712600.iso1.exon1.amp1_434	0.470965388	1.866562929	1.39559754	0.008379248	0.99024585	0.73734623	0.240930233	0.488837897	FALSE
872	PF3D7_0712800.iso1.exon1.amp1_3904	0.621002528	1.734816849	1.113814321	0.090656423	1.145297666	1.122969554	0.162433932	0.912416971	FALSE
873	PF3D7_0712800.iso1.exon2.amp2_1944	-0.640229601	-0.630177249	0.010052352	0.982396217	0.694062964	0.927779226	0.002314819	0.998284684	FALSE
874	PF3D7_0712900.iso1.exon1.amp1_3316	0.727405614	1.821366994	1.09396138	0.180099893	1.270274419	1.486805444	0.140671198	0.938661894	FALSE
875	PF3D7_0712900.iso1.exon2.amp2_215	-0.514051971	-0.630904534	-0.116852564	0.612576853	0.563824087	0.438369336	-0.035326606	0.978203774	FALSE
876	PF3D7_0713000.iso1.exon2.amp1_2451	-0.329517156	-0.435396064	-0.105878908	0.638876192	0.705904936	0.401330882	-0.025994847	0.978203774	FALSE
877	PF3D7_0713100.2o2_5537	-0.411971242	-0.364054667	0.047916575	0.911307587	0.774187459	0.863815193	0.010177885	0.998284684	FALSE
878	PF3D7_0713600.iso1.exon1.amp1_3623	-0.272695994	-0.116106621	0.156589373	0.656015734	0.368213803	0.718817813	0.061871282	0.978203774	FALSE
879	PF3D7_0713900.e1s1_5647	-0.79061239	-0.786156131	0.004456259	0.986331873	0.594327694	0.506966125	0.001269014	0.998284684	FALSE
880	PF3D7_0713900.e1s3_8249	0.061093177	0.074328573	0.013235395	0.970802169	0.781276351	0.710918727	0.002850828	0.998284684	FALSE
881	PF3D7_0713900.e1s4_5937	1.176782466	0.716020008	-0.460762458	0.621619996	1.272554893	1.884442018	-0.056705132	0.978203774	FALSE
882	PF3D7_0714000.e1s1_6579	-0.512261769	-0.672627036	-0.160365267	0.239580844	0.393581841	0.236623457	-0.070453817	0.956958241	FALSE
883	PF3D7_0714200.iso1.exon1.amp2_463	-0.194447134	-0.283646281	-0.089199147	0.74806973	0.762393233	0.517814461	-0.020110966	0.980535118	FALSE
884	PF3D7_0715000.1o1_5833	-0.445051128	-0.461709313	-0.016658185	0.940910007	0.459812378	0.445042807	-0.006059353	0.998284684	FALSE
885	PF3D7_0715300.1o3_4714	-0.307973512	-0.424679399	-0.116705887	0.245926792	0.362634578	0.160382531	-0.056208643	0.963001913	FALSE
886	PF3D7_0715600.1o1_6202	-0.569764101	-0.972507233	-0.402743131	0.066828775	0.810665424	0.323936126	-0.08696011	0.865570079	FALSE
887	PF3D7_0715800.1o1_6729	-0.221333128	-0.428369448	-0.20703632	0.683268724	0.727033856	1.026587148	-0.045039805	0.978203774	FALSE
888	PF3D7_0716200.1o1_8223	-0.312874741	-0.441669288	-0.128794547	0.719504614	0.423300967	0.733777817	-0.045859054	0.978203774	FALSE
889	PF3D7_0716300.e1s1_8921	0.939459314	1.46659487	0.527135556	0.310021996	1.0629349	0.971034082	0.083424436	0.978054103	FALSE
890	PF3D7_0717000.iso1.exon2.amp1_1484	-0.563753628	-0.87608107	-0.312327442	0.13303621	0.717794415	0.328191582	-0.075933526	0.912416971	FALSE
891	PF3D7_0717200.1o2_8169	0.029593763	-0.290391393	-0.319985157	0.302837386	0.702278586	0.572978246	-0.077390811	0.978054103	FALSE
892	PF3D7_0717300.1o4_7894	-0.481161198	-0.681512848	-0.200351651	0.427705409	0.533316726	0.481248869	-0.063268061	0.978054103	FALSE
893	PF3D7_0717500.e1s1_5155	-0.024744334	0.531631172	0.556375506	0.426702264	0.793064015	1.387890584	0.105463128	0.978054103	FALSE
894	PF3D7_0717700.e1s1_9221	-0.502690051	-0.560735799	-0.058045747	0.714754467	0.499375763	0.283025281	-0.020147427	0.978203774	FALSE
895	PF3D7_0718000.e11s1_8030	-0.831600993	-1.044115776	-0.212514783	0.091572013	0.493952721	0.181334984	-0.075422537	0.912416971	FALSE
896	PF3D7_0718000.e4s1_4866	-0.288575984	-0.338781976	-0.050205992	0.891249371	0.588445893	0.744338779	-0.013768376	0.997630034	FALSE
897	PF3D7_0718000.e5s1_8036	-0.82458875	-0.731865218	0.092723531	0.856525273	0.577821259	1.057634757	0.023815663	0.993519608	FALSE
898	PF3D7_0718000.e9s3_8251	-0.783439028	-1.263780406	-0.480341378	0.017357165	0.623954745	0.294691301	-0.134230155	0.61340006	FALSE
899	PF3D7_0718000.e9s4_5939	-0.028989226	-0.433800846	-0.40481162	0.311243597	0.893264021	0.740160697	-0.076880938	0.978054103	FALSE
900	PF3D7_0718100.iso1.exon1.amp2_1370	-0.319949879	0.08080218	0.40075206	0.158700761	0.418828051	0.512934689	0.155221278	0.916954512	FALSE
901	PF3D7_0718300.e5s1_8050	0.029816924	-0.21216503	-0.241981954	0.736883065	1.006301214	1.463990643	-0.037801549	0.980535118	FALSE
902	PF3D7_0718300.e7s1_4783	-0.02593044	0.086516631	0.11244707	0.762854959	0.88959502	0.717244286	0.021489009	0.982640702	FALSE
903	PF3D7_0718600.iso1.exon6.amp1_3617	-0.063047338	0.208722411	0.271769749	0.521377072	0.582796159	0.846146064	0.073337011	0.978054103	FALSE
904	PF3D7_0718600.iso1.exon8.amp1_4159	-0.355139597	-0.137247758	0.217891839	0.681103909	0.778344117	1.071003463	0.044500707	0.978203774	FALSE
905	PF3D7_0718800.iso1.exon4.amp1_3221	-0.644516404	-0.838639744	-0.19412334	0.06980046	0.473241848	0.134712073	-0.072149156	0.867138269	FALSE
906	PF3D7_0719000.1o1_5524	-0.270798672	0.415013637	0.685812309	0.286929005	0.944700249	1.225036273	0.116656461	0.978054103	FALSE
907	PF3D7_0719100.iso1.exon2.amp1_947	-0.111508664	0.178914218	0.290422882	0.571511283	0.816969757	1.021917452	0.057472503	0.978054103	FALSE
908	PF3D7_0719200.e1s1_7415	-0.518169209	-0.765502117	-0.247332908	0.220458673	0.490474902	0.360530343	-0.086277604	0.956958241	FALSE
909	PF3D7_0719200.e9s1_8565	-0.145580728	-0.08322615	0.062354577	0.918470842	0.655911674	1.25995886	0.013902292	0.998284684	FALSE
910	PF3D7_0719400.s1_5695	-0.909797575	-1.068528474	-0.1587309	0.556485956	0.528602554	0.527031293	-0.05006385	0.978054103	FALSE
911	PF3D7_0719500.1o2_8186	-0.179171648	0.043967345	0.223138993	0.595994601	0.688691554	0.838335097	0.052610886	0.978203774	FALSE
912	PF3D7_0719500.2o2_9047	-0.545640549	-0.750150257	-0.204509708	0.185686628	0.323008178	0.277358274	-0.107097992	0.939531746	FALSE
913	PF3D7_0719600.e2_5954	-0.454859302	-0.518452237	-0.063592935	0.711351062	0.323317157	0.341071401	-0.032577911	0.978203774	FALSE
914	PF3D7_0719700 (renamed)_9040	1.790391632	1.851383072	0.06099144	0.916895449	1.088377142	1.169885221	0.009260216	0.998284684	FALSE
915	PF3D7_0719700.e3s1_7128	-0.452597084	-0.538290875	-0.085693792	0.54796382	0.334797884	0.271445903	-0.043495467	0.978054103	FALSE
916	PF3D7_0721000.iso1.exon1.amp1_1958	-0.46145855	-0.29397015	0.1674884	0.833511378	0.956391412	1.638172393	0.026480805	0.989130662	FALSE
917	PF3D7_0721000.iso1.exon1.amp2_2247	-0.426665061	-0.268810936	0.157854125	0.822035344	1.033652865	1.427816427	0.02425809	0.98765431	FALSE
918	PF3D7_0721100_5690	-0.066308693	-0.374603188	-0.308294496	0.317682147	0.948653835	0.534179689	-0.056343361	0.978054103	FALSE
919	PF3D7_0721600.e2s1_4856	-0.345856588	-0.478091036	-0.132234449	0.680147187	0.311708264	0.658369311	-0.060088036	0.978203774	FALSE
920	PF3D7_0721700_4819	-0.628200658	0.458493445	1.086694103	0.01126179	0.466135003	0.581302726	0.377090951	0.522989499	FALSE
921	PF3D7_0722600.e1s1_6051	-0.497044598	-0.561609174	-0.064564576	0.881575492	0.648809596	0.88242137	-0.015853824	0.996749065	FALSE
922	PF3D7_0722800.1o1_5891	0.448993284	0.921898889	0.472905605	0.348739493	0.680284416	0.979017361	0.109525596	0.978054103	FALSE
923	PF3D7_0723000.iso1.exon1.amp1_3306	-0.164496157	-0.322442468	-0.15794631	0.647951276	0.688676758	0.679457206	-0.038281191	0.978203774	FALSE
924	PF3D7_0723200.e4s1_7754	-0.632542107	-0.86758784	-0.235045734	0.187179884	0.492467884	0.307602783	-0.082387203	0.939531746	FALSE
925	PF3D7_0723400.e1s2_6637	-0.368948415	-0.217291308	0.151657106	0.683008299	0.70298111	0.735320754	0.035769156	0.978203774	FALSE
926	PF3D7_0723500_4823	-0.718034321	-0.907716882	-0.189682561	0.401917186	0.415359115	0.435601243	-0.075693173	0.978054103	FALSE
927	PF3D7_0723700.iso1.exon1.amp2_1934	-0.757959968	-0.958982066	-0.201022099	0.142619415	0.480579869	0.215738012	-0.073029951	0.916954512	FALSE
928	PF3D7_0723800.iso1.exon1.amp3_2230	-0.778699123	-0.630038952	0.148660171	0.636364014	0.446866187	0.634139094	0.05256394	0.978203774	FALSE
929	PF3D7_0723800.iso1.exon2.amp1_2646	-0.185647519	0.166841522	0.352489041	0.651633648	0.820906077	1.595574411	0.062558849	0.978203774	FALSE
930	PF3D7_0723900.e1s2_5176	-0.386182822	0.191965665	0.578148487	0.167581018	0.531032709	0.762334951	0.171621032	0.924994436	FALSE
931	PF3D7_0724300.iso1.exon1.amp1_112	-0.45792973	-0.227166024	0.230763706	0.215522846	0.388997552	0.338365506	0.100235685	0.956958241	FALSE
932	PF3D7_0724400.iso1.exon1.amp1_2105	-0.683755964	-0.807356755	-0.123600791	0.300160079	0.547029249	0.150891974	-0.039753943	0.978054103	FALSE
933	PF3D7_0724700.e2s2_8380	-0.000100476	-0.458712006	-0.458611531	0.050153442	0.882912319	0.336104784	-0.091002665	0.820283309	FALSE
934	PF3D7_0725100.e1s1_5471	-0.523575319	-0.54110893	-0.017533611	0.96477981	0.814194846	0.786306065	-0.003602653	0.998284684	FALSE
935	PF3D7_0725200.iso1.exon3.amp1_3844	-0.373052612	-0.547387482	-0.17433487	0.014945094	0.282365261	0.094441295	-0.108388348	0.61340006	FALSE
936	PF3D7_0726100.2o2_6782	-0.635165217	-0.456465881	0.178699336	0.438527287	0.423421181	0.446680806	0.069902462	0.978054103	FALSE
937	PF3D7_0726200.iso1.exon2.amp1_1023	-0.265026508	-0.303498367	-0.038471859	0.900109672	0.81034833	0.579432353	-0.008136618	0.998284684	FALSE
938	PF3D7_0726400.e1s1_6882	-0.453435249	-0.628524339	-0.17508909	0.301472503	0.389170386	0.311875378	-0.076520305	0.978054103	FALSE
939	PF3D7_0726400.e1s3_8538	-0.72818868	-0.701960447	0.026228233	0.919871997	0.542042134	0.515130012	0.008108374	0.998284684	FALSE
940	PF3D7_0726400.e2s1_8610	-0.481685088	-0.811700276	-0.330015188	0.080108656	0.734367996	0.271119963	-0.078772879	0.912416971	FALSE
941	PF3D7_0726400.e2s2_9247	-0.241240261	-0.625485397	-0.384245136	0.147648136	0.698341925	0.455140489	-0.094783168	0.916954512	FALSE
942	PF3D7_0726400.e3s1_8933	-0.563333061	-0.750094907	-0.186761846	0.117028218	0.462154821	0.174960861	-0.070805978	0.912416971	FALSE
943	PF3D7_0726400.e6s1_8651	-0.882765096	-1.240679629	-0.357914533	0.178537136	0.748400283	0.456066172	-0.082645183	0.935734819	FALSE
944	PF3D7_0726400.e6s2_4899	0.548060194	0.830067798	0.282007604	0.55472606	0.788508118	0.946400682	0.058200309	0.978054103	FALSE
945	PF3D7_0726500.iso1.exon4.amp1_3386	-0.22898578	-0.049871695	0.179114084	0.717853077	0.664474468	1.008636047	0.041987032	0.978203774	FALSE
946	PF3D7_0726500.iso1.exon4.amp2_2525	-0.44058162	-0.62516284	-0.18458122	0.225076659	0.449751305	0.261349463	-0.071066122	0.956958241	FALSE
947	PF3D7_0726600.1o2_6479	0.071747899	-0.392007872	-0.463755771	0.157648357	0.937171435	0.556239392	-0.085612626	0.916954512	FALSE
948	PF3D7_0727000.iso1.exon1.amp1_1996	-0.715876569	-0.738945409	-0.023068839	0.948299386	0.56221826	0.722518434	-0.00660378	0.998284684	FALSE
949	PF3D7_0727200.1o1_6756	-0.148274613	0.05141806	0.199692673	0.725355841	0.469935378	1.174308858	0.056295337	0.978466981	FALSE
950	PF3D7_0727800.iso1.exon1.amp1_4594	-0.179084748	-0.327627129	-0.14854238	0.623672217	0.786632527	0.568286962	-0.032342988	0.978203774	FALSE
951	PF3D7_0727900.e1s2_5080	-0.277973951	-0.432675461	-0.15470151	0.626550827	0.786673914	0.603119167	-0.03355284	0.978203774	FALSE
952	PF3D7_0728000.e2_6530	-0.555641844	-1.122639032	-0.566997188	0.001673608	0.872310162	0.15245767	-0.114685216	0.259773383	FALSE
953	PF3D7_0728200.2o2_7918	-0.540681383	-0.202768913	0.337912469	0.463151171	0.729366567	0.905169332	0.074998119	0.978054103	FALSE
954	PF3D7_0728300.iso1.exon1.amp1_984	-0.458769024	-0.65090008	-0.192131056	0.135033826	0.292211639	0.223334515	-0.112207446	0.912416971	FALSE
955	PF3D7_0728600.iso1.exon1.amp1_205	-0.57020359	-0.731154706	-0.160951117	0.571005216	0.494893777	0.561732601	-0.053355921	0.978054103	FALSE
956	PF3D7_0728600.iso1.exon3.amp1_2396	0.16665697	0.318762135	0.152105165	0.720005065	1.013861583	0.814944386	0.025510867	0.978203774	FALSE
957	PF3D7_0728700.iso1.exon3.amp1_1258	-0.40171669	-0.224999204	0.176717487	0.414517544	0.450042053	0.412548427	0.066033222	0.978054103	FALSE
958	PF3D7_0728800.iso1.exon1.amp1_4481	-0.558517227	-0.006325155	0.552192071	0.292828334	0.613636392	1.008013571	0.137559033	0.978054103	FALSE
959	PF3D7_0729500.iso1.exon1.amp1_1884	-0.319699195	-0.278304794	0.041394401	0.900888097	0.588551625	0.668337724	0.011538006	0.998284684	FALSE
960	PF3D7_0729700.iso1.exon2.amp1_1872	-0.329167962	0.183855994	0.513023955	0.309454393	0.745230981	0.965901976	0.11063212	0.978054103	FALSE
961	PF3D7_0729800.iso1.exon1.amp1_365	-0.246685492	-0.495807118	-0.249121626	0.094857539	0.487090251	0.236140923	-0.089112658	0.912416971	FALSE
962	PF3D7_0729900.e1s1_5072	-0.558667876	-0.659293187	-0.100625311	0.753578068	0.735094792	0.62103071	-0.023186309	0.980535118	FALSE
963	PF3D7_0730000.iso1.exon1.amp1_348	-0.547193724	-0.449489228	0.097704496	0.754773432	0.739891802	0.602823995	0.022431682	0.980535118	FALSE
964	PF3D7_0730300.e1s1_5186	-0.463402108	-0.753230098	-0.289827989	0.167090521	0.746329314	0.330361792	-0.067823547	0.924994436	FALSE
965	PF3D7_0730300.e1s2_5758	-0.192660903	-0.186659081	0.006001821	0.985013017	0.750320964	0.619735892	0.001357347	0.998284684	FALSE
966	PF3D7_0730500.e1s3_7387	-0.234161416	-0.264289672	-0.030128257	0.915080592	0.618456477	0.554106043	-0.008209681	0.998284684	FALSE
967	PF3D7_0730800.1.e2s1_5161	-0.807331385	-0.381445848	0.425885536	0.46320956	0.895903427	1.142805614	0.076604322	0.978054103	FALSE
968	PF3D7_0730800.iso2.exon2.amp1_1557	-0.828968019	-0.722214364	0.106753655	0.759804821	0.760315912	0.682212626	0.023658732	0.982094362	FALSE
969	PF3D7_0730900.e1s1_8316	-0.254520618	-0.353804803	-0.099284185	0.678480224	0.572952102	0.458822567	-0.029474234	0.978203774	FALSE
970	PF3D7_0730900.e2s1_8659	-0.458699427	-0.023256981	0.435442446	0.41889547	0.549496386	1.069504288	0.115401586	0.978054103	FALSE
971	PF3D7_0731100.2o2_6789	0.550997263	0.871501247	0.320503984	0.600170916	0.919327231	1.225307074	0.055749763	0.978203774	FALSE
972	PF3D7_0731200.2o2_8439	0.393369853	0.661794877	0.268425023	0.695579487	1.146197565	1.374836204	0.038113292	0.978203774	FALSE
973	PF3D7_0731500.s1 (renamed)_7684	-0.727012685	-0.576165194	0.150847491	0.635795145	0.5413989	0.63477245	0.045500117	0.978203774	FALSE
974	PF3D7_0731500.s2 (renamed)_7112	-0.35718409	0.219317004	0.576501094	0.411799699	0.824737268	1.387433918	0.106203636	0.978054103	FALSE
975	PF3D7_0731600.e1s1_6357	0.054742425	-0.031737819	-0.086480244	0.904731994	1.038566729	1.475526056	-0.013153809	0.998284684	FALSE
976	PF3D7_0732000.iso1.exon2.amp1_690	1.151456539	1.473390873	0.321934334	0.655433539	1.343408898	1.428171191	0.03965424	0.978203774	FALSE
977	PF3D7_0732200.iso1.exon2.amp1_1297	0.637243607	1.335597542	0.698353935	0.260334269	1.254274784	1.146659459	0.093654975	0.976799056	FALSE
978	PF3D7_0732300.iso1.exon1.amp1_4175	-0.309301009	-0.930923858	-0.621622848	0.348790482	1.107949925	1.272977463	-0.091889726	0.978054103	FALSE
979	PF3D7_0732400.iso1.exon1.amp1_2443	-0.443027727	-0.351538572	0.091489155	0.828063846	0.784998389	0.841256007	0.019266227	0.989130662	FALSE
980	PF3D7_0732500.iso1.exon1.amp1_135	-0.655000602	-0.440522672	0.214477929	0.492787876	0.513837482	0.615568058	0.067944167	0.978054103	FALSE
981	PF3D7_0732700.iso1.exon2.amp1_712	1.12816986	1.866829766	0.738659906	0.121998749	1.307767447	0.803032803	0.097574943	0.912416971	FALSE
982	PF3D7_0732900.iso1.exon2.amp1_996	0.00952072	0.43864474	0.42912402	0.370009024	0.757462168	0.925677107	0.091934674	0.978054103	FALSE
983	PF3D7_0733000.iso1.exon1.amp1_3621	0.739033123	1.747182212	1.008149089	0.147613423	1.119120864	1.244325986	0.148207232	0.916954512	FALSE
984	PF3D7_0733000.iso1.exon2.amp3_1942	-0.490000486	-0.132787369	0.357213117	0.264876707	0.519863766	0.602408141	0.112400944	0.978054103	FALSE
985	PF3D7_0800100.iso1.exon1.amp1_723	0.722099734	1.720489633	0.9983899	0.235727784	1.263062589	1.573350892	0.127880842	0.956958241	FALSE
986	PF3D7_0800100.iso1.exon2.amp1_3980	-0.508173478	-0.702792648	-0.19461917	0.126450888	0.379080794	0.210741361	-0.08905289	0.912416971	FALSE
987	PF3D7_0800100.iso1.exon2.amp2_4269	-0.676948191	-0.724690644	-0.047742452	0.844417896	0.592061324	0.467783834	-0.013729269	0.993519608	FALSE
988	PF3D7_0800200.e1s1_8827	-0.111106293	-0.533964144	-0.422857851	0.105430922	0.797753969	0.424562599	-0.092086393	0.912416971	FALSE
989	PF3D7_0800200.e1s2_5359	-0.993209172	-0.81344283	0.179766342	0.702427405	0.804090098	0.941721607	0.036514571	0.978203774	FALSE
990	PF3D7_0800200.e2s1_5745	1.486734393	2.131775287	0.645040894	0.208521815	1.179010038	0.919394558	0.093236576	0.956958241	FALSE
991	PF3D7_0800300.e1s3_8831	-0.484339885	-0.844875399	-0.360535514	0.158452645	0.682700896	0.43940543	-0.091028984	0.916954512	FALSE
992	PF3D7_0800300.e2s1_8914	1.806082692	3.144355144	1.338272453	0.000242445	1.228219851	0.431732537	0.191146011	0.135963155	FALSE
993	PF3D7_0800400.iso1.exon3.amp1_128	-0.100428869	0.112739502	0.213168371	0.599221714	0.777071421	0.797072266	0.045588594	0.978203774	FALSE
994	PF3D7_0800500.iso1.exon2.amp1_3888	0.18423061	0.267983235	0.083752624	0.916875091	0.922996973	1.655995158	0.013545392	0.998284684	FALSE
995	PF3D7_0800700.e1s1_6606	-0.296972159	-0.178621099	0.11835106	0.745146678	0.40193754	0.747828946	0.043486993	0.980535118	FALSE
996	PF3D7_0800700.e3s1_5772	-0.491824411	-0.062282911	0.4295415	0.4863052	0.901020375	1.222343632	0.075986014	0.978054103	FALSE
997	PF3D7_0801000.e2s1_5460	0.216462135	0.505489083	0.289026948	0.715941151	1.32718807	1.593831706	0.035435592	0.978203774	FALSE
998	PF3D7_0801000.e2s2_6911	0.406147844	1.273883144	0.8677353	0.231109936	0.951969288	1.357867764	0.143874991	0.956958241	FALSE
999	PF3D7_0801600.1o1_8124	-0.270232233	-0.670051891	-0.399819658	0.169971784	0.71385319	0.51024287	-0.095992542	0.925699889	FALSE
1000	PF3D7_0801700.1o3_5645	-0.663089456	-0.360748664	0.302340792	0.516240053	0.489099769	0.9383432	0.090434712	0.978054103	FALSE
1001	PF3D7_0801800_4835	-0.668225435	-0.600648181	0.067577254	0.823895336	0.63739668	0.597858829	0.017789325	0.988297574	FALSE
1002	PF3D7_0801900.iso1.exon1.amp5_1622	-0.783008417	-0.868337387	-0.08532897	0.780760351	0.791900674	0.580976247	-0.018437908	0.982640702	FALSE
1003	PF3D7_0802000.e1s1_5197	-0.045334932	-0.068398837	-0.023063904	0.938177139	0.745594719	0.56927171	-0.005279364	0.998284684	FALSE
1004	PF3D7_0802000.e1s2_6642	-0.642643277	-0.247638255	0.395005022	0.376655711	0.461320677	0.879286831	0.125523608	0.978054103	FALSE
1005	PF3D7_0802300.iso1.exon1.amp1_1413	-0.500005869	-0.238978094	0.261027774	0.537872492	0.640513934	0.843323271	0.065312001	0.978054103	FALSE
1006	PF3D7_0802300.iso1.exon1.amp2_1927	-0.622322042	-0.670691274	-0.048369232	0.832609593	0.765481265	0.398574707	-0.010985571	0.989130662	FALSE
1007	PF3D7_0802600.iso1.exon3.amp1_1656	-0.782697114	-0.461078389	0.321618725	0.335462589	0.559831731	0.638608744	0.094185399	0.978054103	FALSE
1008	PF3D7_0802600.iso1.exon6.amp1_2681	-0.352026058	-0.501163226	-0.149137169	0.372020711	0.419442997	0.307227302	-0.060847523	0.978054103	FALSE
1009	PF3D7_0802800.2o2_8482	-0.640092691	-0.603759888	0.036332803	0.914263424	0.704719949	0.666287276	0.008643829	0.998284684	FALSE
1010	PF3D7_0803200.iso1.exon1.amp1_3327	-0.744646531	-0.577478244	0.167168287	0.49041121	0.473231796	0.469949173	0.058919974	0.978054103	FALSE
1011	PF3D7_0803400.iso1.exon1.amp1_4581	1.139621508	1.211662466	0.072040958	0.935550832	1.086002488	1.834935785	0.010067165	0.998284684	FALSE
1012	PF3D7_0803400.iso1.exon1.amp2_3948	0.972486916	1.184126478	0.211639562	0.725574691	1.001367736	1.211123487	0.034352873	0.978466981	FALSE
1013	PF3D7_0804000.iso1.exon1.amp1_4456	0.064310813	0.158934162	0.094623349	0.841225311	0.837230947	0.948301417	0.018547294	0.993519608	FALSE
1014	PF3D7_0804000.iso1.exon2.amp1_3276	-0.463700696	-0.376181149	0.087519547	0.552069313	0.379963485	0.275109809	0.039446223	0.978054103	FALSE
1015	PF3D7_0804500.e1s1_5404	-0.580863489	-0.723012188	-0.142148699	0.604552301	0.675974726	0.520355227	-0.035869136	0.978203774	FALSE
1016	PF3D7_0804500.e2s2_5372	-0.491884326	-0.115224278	0.376660048	0.219990394	0.43516545	0.571531724	0.1387784	0.956958241	FALSE
1017	PF3D7_0804500.e2s3_4800	-0.573337869	-0.373436779	0.19990109	0.523671475	0.331266506	0.632065132	0.088434279	0.978054103	FALSE
1018	PF3D7_0804500.e3_7398	-0.698271874	-0.19083655	0.507435324	0.24330357	0.590932901	0.817903809	0.136348631	0.959883446	FALSE
1019	PF3D7_0804600.1o1_6746	-0.469474747	-0.745232128	-0.275757381	0.451758635	1.032796477	0.663788722	-0.046026186	0.978054103	FALSE
1020	PF3D7_0804800.e1s1_5442	-0.372428197	-0.533865858	-0.161437661	0.332672124	0.440548146	0.301229038	-0.062965576	0.978054103	FALSE
1021	PF3D7_0804900.1o1_6159	-0.132830226	-0.280803369	-0.147973143	0.484162253	0.992648587	0.260580346	-0.026239158	0.978054103	FALSE
1022	PF3D7_0805100.iso1.exon1.amp1_3626	-0.493808888	-0.339501723	0.154307165	0.58592003	0.306692383	0.574890074	0.074138844	0.978203774	FALSE
1023	PF3D7_0805300.iso1.exon1.amp2_1057	-0.600070675	-0.481109716	0.11896096	0.614551962	0.339724701	0.475212388	0.055486831	0.978203774	FALSE
1024	PF3D7_0805400.1o6_8716	-0.421127123	-0.56060708	-0.139479957	0.561750579	0.468906254	0.469805406	-0.049565778	0.978054103	FALSE
1025	PF3D7_0805700.iso1.exon1.amp2_3399	-0.515149421	-0.625085242	-0.109935821	0.649822173	0.650753082	0.45169433	-0.029003424	0.978203774	FALSE
1026	PF3D7_0806000.iso1.exon1.amp2_515	-0.695223489	-0.487249017	0.207974471	0.806555725	1.526167927	1.700954777	0.022412523	0.983296632	FALSE
1027	PF3D7_0806200.10o10_8244	-0.629059053	-0.873202854	-0.244143801	0.124604132	0.423928504	0.268901006	-0.099339692	0.912416971	FALSE
1028	PF3D7_0806300.iso1.exon1.amp1_485	-0.464204357	-0.800290805	-0.336086447	0.182196557	0.773760161	0.422590026	-0.075391185	0.939531746	FALSE
1029	PF3D7_0806300.iso1.exon2.amp1_3830	-0.506071601	-0.433142876	0.072928725	0.671040177	0.497854796	0.314050146	0.025274358	0.978203774	FALSE
1030	PF3D7_0806500.e1s1_5475	-0.436016933	-0.663241969	-0.227225036	0.513128682	1.034040923	0.623244981	-0.037992697	0.978054103	FALSE
1031	PF3D7_0806600.e2s1_5153	-0.376570847	-0.549271054	-0.172700207	0.272927928	0.400207217	0.28337899	-0.074000266	0.978054103	FALSE
1032	PF3D7_0806600.e3s1_8038	-0.424421533	-0.509323906	-0.084902373	0.832293465	0.989300381	0.768560947	-0.014629291	0.989130662	FALSE
1033	PF3D7_0806600.e5s1_5749	-0.312952921	-0.190325198	0.122627723	0.49511458	0.520157976	0.324679864	0.040696053	0.978054103	FALSE
1034	PF3D7_0806700.iso1.exon1.amp1_1804	-0.436387365	-0.72701193	-0.290624565	0.043322238	0.482323391	0.216097977	-0.105205293	0.804473878	FALSE
1035	PF3D7_0806700.iso1.exon3.amp3_1358	-0.452888113	-0.878115255	-0.425227142	0.011377446	0.820028424	0.155733605	-0.091461919	0.522989499	FALSE
1036	PF3D7_0806800.e1s1_8932	-0.292610432	0.095875301	0.388485733	0.42300734	0.692612575	0.952280611	0.089176046	0.978054103	FALSE
1037	PF3D7_0806900.iso1.exon1.amp1_704	-0.645671614	-0.785065805	-0.139394191	0.196877319	0.440399854	0.155980285	-0.055519302	0.956748705	FALSE
1038	PF3D7_0807100.iso1.exon1.amp2_3363	-0.688957893	-0.296155279	0.392802614	0.312262471	0.564265524	0.74498459	0.111509485	0.978054103	FALSE
1039	PF3D7_0807700.1o5_5328	-0.557891018	-0.800689496	-0.242798478	0.166149118	0.773044763	0.230081363	-0.055217289	0.924994436	FALSE
1040	PF3D7_0807700.5o5_5617	-0.338993427	-0.250042151	0.088951276	0.711543168	0.526087932	0.468572851	0.028509388	0.978203774	FALSE
1041	PF3D7_0807800.e2s1_6602	0.535602122	0.244031385	-0.291570737	0.564801131	1.105365126	0.976347202	-0.044509875	0.978054103	FALSE
1042	PF3D7_0808100.iso1.exon2.amp1_3829	-0.266851841	-0.612289088	-0.345437247	0.067954945	0.559321493	0.301833452	-0.107242914	0.867121223	FALSE
1043	PF3D7_0808100.iso1.exon3.amp1_3963	0.0158576	-0.224516135	-0.240373735	0.597118847	0.79981237	0.900782416	-0.049358961	0.978203774	FALSE
1044	PF3D7_0808200.e1s1_9217	0.694281704	0.554649835	-0.139631868	0.542331893	0.918644073	0.35023913	-0.026628839	0.978054103	FALSE
1045	PF3D7_0808400.1o1_4673	-0.618554327	-0.628400839	-0.009846511	0.955668029	0.41541995	0.343591183	-0.004021638	0.998284684	FALSE
1046	PF3D7_0808600.e1s2_6520	-0.659028101	-0.534410879	0.124617222	0.670008594	0.630806936	0.569377057	0.033269587	0.978203774	FALSE
1047	PF3D7_0808600.e2s1_8343	0.610591763	1.756258771	1.145667008	0.03718781	1.065420092	0.86662994	0.182686862	0.761128597	FALSE
1048	PF3D7_0808700.iso1.exon1.amp1_3035	0.51776814	0.760684994	0.242916853	0.717293775	1.033430882	1.354306064	0.037702594	0.978203774	FALSE
1049	PF3D7_0808700.iso1.exon2.amp1_2238	-0.515341355	-0.787914791	-0.272573436	0.053534895	0.383240921	0.224990905	-0.123105493	0.820283309	FALSE
1050	PF3D7_0808800.iso1.exon1.amp1_3594	-0.092955591	0.243984139	0.33693973	0.612176164	0.668427589	1.355166443	0.072425232	0.978203774	FALSE
1051	PF3D7_0808900.iso1.exon1.amp1_4458	-0.097562005	-0.088085809	0.009476196	0.986804514	0.801483416	1.172873331	0.001856346	0.998284684	FALSE
1052	PF3D7_0809100.iso1.exon1.amp1_4184	0.111244223	1.13612456	1.024880337	0.076962111	0.947219092	0.974668008	0.179745269	0.910436594	FALSE
1053	PF3D7_0809100.iso1.exon2.amp1_1077	-0.443398152	-0.449481249	-0.006083097	0.986218114	0.449139557	0.724196079	-0.00208	0.998284684	FALSE
1054	PF3D7_0809100.iso1.exon2.amp2_seg2_2600	-0.597359229	-0.421474763	0.175884466	0.550693538	0.433251999	0.588443451	0.064692723	0.978054103	FALSE
1055	PF3D7_0809200.e1s2_6342	-0.136294016	-0.267209443	-0.130915427	0.714776902	0.87144931	0.685476245	-0.025585687	0.978203774	FALSE
1056	PF3D7_0809500.iso1.exon1.amp1_3552	-0.465297021	-0.726208112	-0.260911091	0.108124836	0.400941643	0.274984549	-0.111796906	0.912416971	FALSE
1057	PF3D7_0809600.iso1.exon1.amp4_seg1_2308	-0.393454403	-0.447995494	-0.054541091	0.893132363	0.537599945	0.83249198	-0.015731154	0.998284684	FALSE
1058	PF3D7_0809900.iso1.exon1.amp1_seg2_287	-0.075918693	0.164373635	0.240292328	0.645985385	0.85319854	1.046664197	0.045675729	0.978203774	FALSE
1059	PF3D7_0809900.iso1.exon1.amp2_seg2_576	-0.130277908	0.062928183	0.193206091	0.705840258	0.838397436	1.028113711	0.037376001	0.978203774	FALSE
1060	PF3D7_0810300.2o4_8207	-0.484798835	-0.338381954	0.146416881	0.541061445	0.69370668	0.43441582	0.036429104	0.978054103	FALSE
1061	PF3D7_0810800.e2s1_9231	-0.142954872	0.039570092	0.182524964	0.647766212	0.591727501	0.804586904	0.049144814	0.978203774	FALSE
1062	PF3D7_0810900.1.1o2_7001	-0.442927468	-0.158475033	0.284452435	0.536207895	0.347257449	0.934868304	0.10488817	0.978054103	FALSE
1063	PF3D7_0811600.e2s1_6045	-0.494776385	-0.948420133	-0.453643748	0.063558031	0.59303204	0.399058906	-0.131554642	0.862760147	FALSE
1064	PF3D7_0811600.e2s2_7207	0.199280374	0.540364461	0.341084088	0.619640553	0.856596835	1.392399109	0.061029272	0.978203774	FALSE
1065	PF3D7_0812100.e1s1_5364	-0.239522424	-0.26606867	-0.026546246	0.966302643	0.972128738	1.27824016	-0.004377406	0.998284684	FALSE
1066	PF3D7_0812400.e1s1_6614	-0.272791691	-0.288323534	-0.015531843	0.970953877	0.521409938	0.878753373	-0.004523677	0.998284684	FALSE
1067	PF3D7_0812600.iso1.exon2.amp1_4140	-0.258443582	-0.365674183	-0.107230601	0.613904671	0.568140541	0.396066858	-0.032395282	0.978203774	FALSE
1068	PF3D7_0812700.1o1_7561	0.551409872	0.261307341	-0.290102531	0.311225512	0.647530774	0.529589665	-0.076081529	0.978054103	FALSE
1069	PF3D7_0812900.2o2_8824	-0.41921641	-0.579551526	-0.160335116	0.501049064	0.511681411	0.457394636	-0.05281785	0.978054103	FALSE
1070	PF3D7_0813400.e2s1_6043	-0.22901734	-0.230163168	-0.001145828	0.997694216	0.811789625	0.785388552	-0.000236088	0.999164392	FALSE
1071	PF3D7_0813700.iso1.exon1.amp2_2781	-0.845389518	-0.709689071	0.135700448	0.732255012	0.815617637	0.780055302	0.027861941	0.980114074	FALSE
1072	PF3D7_0813900.e2s1_8892	-0.462436898	-0.772431446	-0.309994548	0.16635792	0.533432511	0.393149628	-0.099410987	0.924994436	FALSE
1073	PF3D7_0814600.e1s1_5462	-0.568943011	-0.756598409	-0.187655398	0.449292836	0.74170096	0.441365765	-0.043767536	0.978054103	FALSE
1074	PF3D7_0815100.iso1.exon1.amp1_2474	-0.536519875	-0.820767129	-0.284247254	0.193947095	0.592951035	0.380142295	-0.082646282	0.947383632	FALSE
1075	PF3D7_0815300.iso1.exon1.amp1_4308	-0.325425751	-0.327164345	-0.001738594	0.996577377	0.686600089	0.81890063	-0.000412459	0.999164392	FALSE
1076	PF3D7_0815300.iso1.exon1.amp2_seg1_2595	-0.194253016	-0.220422491	-0.026169475	0.9408514	0.698259894	0.701312608	-0.006243316	0.998284684	FALSE
1077	PF3D7_0815400.e1s1_8889	-0.799495242	-0.894401916	-0.094906674	0.638835499	0.577044208	0.370927985	-0.028351566	0.978203774	FALSE
1078	PF3D7_0815500.3o5_7032	0.635611561	1.474047211	0.83843565	0.109897971	0.956383286	0.908837055	0.146905665	0.912416971	FALSE
1079	PF3D7_0816100.1o4_7264	-0.600168893	-0.823518586	-0.223349693	0.299145165	0.804725491	0.338551433	-0.048530059	0.978054103	FALSE
1080	PF3D7_0816200.1o1_6682	0.179825042	0.02061912	-0.159205922	0.66979953	0.990209547	0.699525187	-0.027575073	0.978203774	FALSE
1081	PF3D7_0816500.e2s1_4845	-0.452104577	-0.539579038	-0.087474461	0.433757208	0.547994539	0.123591721	-0.028128965	0.978054103	FALSE
1082	PF3D7_0816600.e1s1_6325	-0.441414469	-0.596173125	-0.154758656	0.361618065	0.342309337	0.321219707	-0.075855249	0.978054103	FALSE
1083	PF3D7_0816700.iso1.exon3.amp1_4095	-0.18983775	-0.245037957	-0.055200208	0.770644634	0.801016672	0.276511749	-0.012092428	0.982640702	FALSE
1084	PF3D7_0817300.e1s3_7500	1.18134668	1.121053808	-0.060292871	0.932775571	1.170676545	1.447477737	-0.008342189	0.998284684	FALSE
1085	PF3D7_0817700.iso1.exon14.amp1_1790	-0.847085627	-1.140290403	-0.293204776	0.111107486	0.580227126	0.297397507	-0.087898554	0.912416971	FALSE
1086	PF3D7_0817700.iso1.exon15.amp1_2691	-0.376868464	-0.666371687	-0.289503223	0.0630972	0.52983503	0.23762849	-0.09539935	0.862760147	FALSE
1087	PF3D7_0818500.e2_5381	-0.273326394	-0.278749999	-0.005423605	0.987093778	0.686062376	0.664171794	-0.001322189	0.998284684	FALSE
1088	PF3D7_0818900_4784	0.563725521	0.181307452	-0.382418069	0.446654168	1.10937226	0.954329965	-0.058300856	0.978054103	FALSE
1089	PF3D7_0819600.2o2_6409	-0.59497468	-0.611363862	-0.016389182	0.921391093	0.628562616	0.269266007	-0.004557313	0.998284684	FALSE
1090	PF3D7_0819800.e4s1_8607	-0.271407198	0.430479309	0.701886507	0.222276408	0.697494837	1.076016457	0.156170732	0.956958241	FALSE
1091	PF3D7_0820600.3o3_6147	-0.445366664	-0.690275604	-0.24490894	0.023459102	0.362378279	0.157204177	-0.118091447	0.666326899	FALSE
1092	PF3D7_0821000.1o5_7907	-0.158200338	-0.145367029	0.012833309	0.964070271	0.658667918	0.554062039	0.003301361	0.998284684	FALSE
1093	PF3D7_0821300.iso1.exon1.amp1_3317	-0.564535184	0.129168035	0.693703219	0.342780161	0.704250652	1.429707157	0.141462371	0.978054103	FALSE
1094	PF3D7_0821300.iso1.exon3.amp1_3898	-0.102566743	-0.347394872	-0.24482813	0.559785447	0.893300107	0.81183171	-0.046126869	0.978054103	FALSE
1095	PF3D7_0821500.1o1_8442	0.437248267	0.364759515	-0.072488752	0.904700189	1.141058674	1.210016807	-0.010515445	0.998284684	FALSE
1096	PF3D7_0821600.1o1_4738	-0.400581878	-0.486580191	-0.085998313	0.531605806	0.468371937	0.234003955	-0.031963352	0.978054103	FALSE
1097	PF3D7_0822600.e2s1_7209	-1.08014857	-1.351767786	-0.271619216	0.217315911	1.167531383	0.165566221	-0.041074452	0.956958241	FALSE
1098	PF3D7_0823300 (renamed, has duplicates)_6432	0.838344491	0.705876995	-0.132467495	0.821124919	1.489800104	1.115649648	-0.01519478	0.98765431	FALSE
1099	PF3D7_0823300.e1s1_7488	-0.295764636	-0.582601799	-0.286837163	0.233387785	0.972071272	0.353268356	-0.051737649	0.956958241	FALSE
1100	PF3D7_0823300.e1s2_7199	0.191982947	0.376926742	0.184943795	0.622097587	1.022375421	0.696290109	0.031089653	0.978203774	FALSE
1101	PF3D7_0823500.1o1_5877	0.22781974	0.260404244	0.032584504	0.954425969	0.629882838	1.178853006	0.007626441	0.998284684	FALSE
1102	PF3D7_0823800_6524	-0.831860203	-0.580694453	0.25116575	0.379804923	0.532670966	0.547602504	0.078339869	0.978054103	FALSE
1103	PF3D7_0823900.1o1_8440	0.258131984	-0.120638202	-0.378770187	0.264870081	0.888341374	0.606632716	-0.073268677	0.978054103	FALSE
1104	PF3D7_0824200.iso1.exon2.amp1_seg1_3174	-0.368603925	-0.59396969	-0.225365765	0.083157415	0.458368553	0.198406852	-0.085915419	0.912416971	FALSE
1105	PF3D7_0824200.iso1.exon2.amp2_seg1_3463	-0.004875472	-0.250836394	-0.245960922	0.159934955	0.740609501	0.241201166	-0.058323254	0.916954512	FALSE
1106	PF3D7_0824600.1o5_8431	-0.322148539	-0.650076681	-0.327928142	0.145882641	0.586903791	0.387128408	-0.096191565	0.916954512	FALSE
1107	PF3D7_0824700.iso1.exon16.amp1_3245	-0.075147744	-0.056362795	0.018784949	0.970804381	0.830110356	1.040769248	0.003657161	0.998284684	FALSE
1108	PF3D7_0825200.iso1.exon1.amp1_2065	-0.478088698	-0.624519986	-0.146431289	0.309294331	0.584079893	0.213155154	-0.043954301	0.978054103	FALSE
1109	PF3D7_0825200.iso1.exon4.amp1_4086	-0.496275855	-0.439872772	0.056403083	0.853696788	0.337293688	0.631177955	0.024653714	0.993519608	FALSE
1110	PF3D7_0825600.iso1.exon1.amp1_3549	-0.45981636	-0.120746166	0.339070194	0.466392507	0.43298011	0.933731281	0.110087068	0.978054103	FALSE
1111	PF3D7_0825800.iso1.exon1.amp1_1307	0.174372432	0.394325628	0.219953196	0.557922614	0.649893977	0.741689183	0.055482912	0.978054103	FALSE
1112	PF3D7_0826000.iso1.exon1.amp2_3371	-0.380275618	-0.415132702	-0.034857084	0.918238836	0.576292361	0.685541507	-0.009856123	0.998284684	FALSE
1113	PF3D7_0826100.s1_5414	-0.720912918	-0.80673737	-0.085824452	0.768633043	0.823777938	0.540203853	-0.017941404	0.982640702	FALSE
1114	PF3D7_0826100.s2_5703	0.017463018	-0.164654809	-0.182117827	0.749260135	0.898764037	1.150429053	-0.032634247	0.980535118	FALSE
1115	PF3D7_0826100.s3_8299	-0.199815524	-0.838946509	-0.639130985	0.039949039	0.758298458	0.490840713	-0.145241183	0.778685174	FALSE
1116	PF3D7_0826100.s4_8588	0.498861812	0.102961968	-0.395899844	0.375774875	1.048642382	0.832188264	-0.06425813	0.978054103	FALSE
1117	PF3D7_0826100.s8_8594	-0.281773352	-0.410020109	-0.128246756	0.700717361	0.759208697	0.645601543	-0.028596932	0.978203774	FALSE
1118	PF3D7_0826300.1o1_6730	0.443226247	0.801219146	0.357992899	0.554573237	0.872187758	1.211372885	0.065130039	0.978054103	FALSE
1119	PF3D7_0826400.iso1.exon6.amp1_665	-0.273796395	0.372872127	0.646668522	0.125725401	0.586170084	0.746109714	0.177843056	0.912416971	FALSE
1120	PF3D7_0826500.e1s1_5469	-0.523624215	-0.314763991	0.208860224	0.672489245	0.606610828	1.006104099	0.052504238	0.978203774	FALSE
1121	PF3D7_0826500.e1s2_5180	-0.12022289	-0.346431968	-0.226209078	0.613682262	0.998850464	0.864784782	-0.038281247	0.978203774	FALSE
1122	PF3D7_0826700.e2_6241	-0.028702973	-0.296256653	-0.26755368	0.533020115	0.971055198	0.820471418	-0.046669233	0.978054103	FALSE
1123	PF3D7_0827100.s2_5089	-0.354729303	-0.349575391	0.005153912	0.991023538	0.923431072	0.909205683	0.000931794	0.998284684	FALSE
1124	PF3D7_0827600.2o2_6223	1.459476909	1.488731919	0.029255009	0.935672862	1.331762315	0.599903908	0.003834948	0.998284684	FALSE
1125	PF3D7_0827800.e1s1_6935	-0.422691002	-0.555897638	-0.133206636	0.687869954	0.4553648	0.672525311	-0.045839157	0.978203774	FALSE
1126	PF3D7_0827800.e1s3_6929	-0.357455767	-0.389604725	-0.032148958	0.893882809	0.68977661	0.445910263	-0.00803205	0.998284684	FALSE
1127	PF3D7_0827900.e2_7119	-0.115408745	-0.081388775	0.03401997	0.911734076	0.67021547	0.602045937	0.008552192	0.998284684	FALSE
1128	PF3D7_0828100.iso1.exon3.amp1_1012	-0.405136445	-0.37861266	0.026523784	0.917076486	0.451010209	0.512392865	0.009647046	0.998284684	FALSE
1129	PF3D7_0828200.iso1.exon1.amp2_1624	-0.281121784	0.280270301	0.561392086	0.087062829	0.829890482	0.545399869	0.116480345	0.912416971	FALSE
1130	PF3D7_0828400.1o1_8192	0.009580021	-0.060734303	-0.070314324	0.822810438	0.753816596	0.604983118	-0.015863104	0.98765431	FALSE
1131	PF3D7_0828500.4o4_8157	-0.884007962	-0.884586511	-0.000578549	0.998678992	0.638778273	0.701150433	-0.000149263	0.999164392	FALSE
1132	PF3D7_0829000.e2s1_7406	-0.756015796	-0.54797424	0.208041556	0.698140352	0.716417547	1.090296652	0.045206008	0.978203774	FALSE
1133	PF3D7_0829600.1o1_8708	-0.600827644	-0.595269084	0.005558559	0.992550498	0.60484603	1.234330559	0.001317463	0.998662463	FALSE
1134	PF3D7_0830600.2o2_6153	-0.166653039	-0.010215594	0.156437446	0.551297875	0.796744285	0.469446712	0.033979915	0.978054103	FALSE
1135	PF3D7_0830800.iso1.exon1.amp1_1373	-0.052856046	0.467492414	0.520348461	0.051466953	0.68207924	0.427582702	0.131665305	0.820283309	FALSE
1136	PF3D7_0830800.iso1.exon1.amp2_4505	-0.49775174	0.067486152	0.565237892	0.088521403	0.574396885	0.564944364	0.164307332	0.912416971	FALSE
1137	PF3D7_0830800.iso1.exon2.amp1_1892	-0.414813613	0.245042634	0.659856247	0.331865777	0.567279248	1.328850969	0.158365261	0.978054103	FALSE
1138	PF3D7_0831100.iso1.exon1.amp2_3348	-0.697447204	-0.4862031	0.211244104	0.532509322	0.607900506	0.664754592	0.057296408	0.978054103	FALSE
1139	PF3D7_0831100.iso1.exon2.amp1_4116	0.068192945	-0.37195025	-0.440143195	0.048089901	0.895653711	0.304962604	-0.086249105	0.820283309	FALSE
1140	PF3D7_0831200.iso1.exon1.amp1_2190	0.040085449	-0.210311428	-0.250396877	0.08798218	0.766823521	0.113225993	-0.057645779	0.912416971	FALSE
1141	PF3D7_0831300.2o2_7356	-0.410659987	-0.05893895	0.351721037	0.566352634	1.105146211	1.20875549	0.052473764	0.978054103	FALSE
1142	PF3D7_0831400.2o2_8450	-0.042345064	-0.412944034	-0.370598969	0.338984524	0.711229603	0.736971295	-0.086491268	0.978054103	FALSE
1143	PF3D7_0831500.iso1.exon2.amp1_2951	0.50473398	1.22375496	0.719020981	0.203283408	0.844897601	1.042423344	0.137891714	0.956958241	FALSE
1144	PF3D7_0831500.iso1.exon3.amp1_1846	-0.688867066	-0.70608211	-0.017215044	0.958202391	0.788281488	0.634489353	-0.003713148	0.998284684	FALSE
1145	PF3D7_0831700.2o2_5026	-0.380428594	0.11758396	0.498012554	0.596667045	1.28731256	1.894898918	0.060664653	0.978203774	FALSE
1146	PF3D7_0831800.2o2_5849	-0.344662065	-0.094101841	0.250560224	0.690545402	1.085378885	1.257694735	0.037762778	0.978203774	FALSE
1147	PF3D7_0832000.iso1.exon3.amp1_1848	-0.545581371	-0.30927223	0.236309141	0.231570695	0.621269242	0.333421817	0.066061005	0.956958241	FALSE
1148	PF3D7_0832300.2o2_7858	-0.2580651	-0.37709365	-0.11902855	0.571689717	0.719161885	0.358723887	-0.028813688	0.978054103	FALSE
1149	PF3D7_0832400.iso1.exon3.amp1_1853	0.129777215	0.152357094	0.022579878	0.968729987	1.089803611	1.151525713	0.003431072	0.998284684	FALSE
1150	PF3D7_0832800.iso1.exon3.amp1_1854	0.860947361	1.279117232	0.418169871	0.43065375	0.953584369	1.028118679	0.072436623	0.978054103	FALSE
1151	PF3D7_0832900.iso1.exon3.amp1_986	0.900147766	1.40596715	0.505819383	0.486429661	1.372218539	1.413074359	0.061230485	0.978054103	FALSE
1152	PF3D7_0833000.iso1.exon3.amp1_3881	0.691549444	0.931303818	0.239754374	0.775130771	1.270538114	1.701299291	0.030150217	0.982640702	FALSE
1153	PF3D7_0833100.iso1.exon3.amp1_4170	-0.017212195	0.366388047	0.383600242	0.647452415	1.09955919	1.700082777	0.054114096	0.978203774	FALSE
1154	PF3D7_0833200.iso1.exon3.amp1_3030	-0.098252757	0.616310054	0.71456281	0.227717917	0.811366006	1.107169714	0.140219909	0.956958241	FALSE
1155	PF3D7_0833300.iso1.exon1.amp1_1870	0.872520835	0.815640125	-0.056880711	0.933059862	1.11765217	1.370557711	-0.008254303	0.998284684	FALSE
1156	PF3D7_0833400.iso1.exon3.amp1_4185	-0.079576677	-0.08039401	-0.000817333	0.998365433	0.80599413	0.7916247	-0.000169344	0.999164392	FALSE
1157	PF3D7_0833500.iso1.exon3.amp1_3614	0.854332711	1.695023339	0.840690628	0.217321387	1.237727144	1.252069526	0.113057236	0.956958241	FALSE
1158	PF3D7_0900100.iso1.exon2.amp1_151	1.081289737	2.225830143	1.144540407	0.066575597	1.216177435	1.033072287	0.159333578	0.865570079	FALSE
1159	PF3D7_0900200.e2s1_8924	0.298856306	0.588575612	0.289719305	0.693985765	1.124174884	1.485130203	0.041277819	0.978203774	FALSE
1160	PF3D7_0900300.iso1.exon1.amp1_1001	-0.213061005	0.705047025	0.91810803	0.238079778	0.884326646	1.467515032	0.158295718	0.956958241	FALSE
1161	PF3D7_0900400.iso1.exon2.amp1_1867	-0.338989076	0.189531172	0.528520248	0.367028239	0.653837391	1.148392915	0.12139364	0.978054103	FALSE
1162	PF3D7_0900500.iso1.exon1.amp1_4464	0.548976022	1.988324994	1.439348972	0.105380886	1.187230977	1.543846001	0.194722942	0.912416971	FALSE
1163	PF3D7_0900600.iso1.exon1.amp1_424	0.016046799	0.194561051	0.178514252	0.753624563	1.070477221	1.131286824	0.02761489	0.980535118	FALSE
1164	PF3D7_0900700.iso1.exon1.amp1_2726	-0.334506198	-0.049800943	0.284705255	0.583727802	0.754240549	1.041650805	0.059962181	0.978203774	FALSE
1165	PF3D7_0900900.iso1.exon1.amp1_4454	0.868208034	1.33968497	0.471476937	0.503460042	1.411230869	1.364624702	0.055883569	0.978054103	FALSE
1166	PF3D7_0901000.iso1.exon1.amp1_3010	1.205856505	2.123298011	0.917441505	0.291865541	1.225617183	1.660872365	0.119337208	0.978054103	FALSE
1167	PF3D7_0901100.iso1.exon1.amp1_3608	-0.050482302	-0.125741486	-0.075259184	0.803462879	0.608440206	0.59822343	-0.020653579	0.983296632	FALSE
1168	PF3D7_0901300.iso1.exon2.amp1_1859	-0.22300404	0.538778277	0.761782318	0.340576592	1.066710635	1.548218427	0.112318905	0.978054103	FALSE
1169	PF3D7_0901400.iso1.exon2.amp1_711	-0.532963077	-0.357008504	0.175954573	0.56486955	0.565557589	0.600829078	0.051486235	0.978054103	FALSE
1170	PF3D7_0901500.iso1.exon2.amp1_4476	0.417698095	0.883150951	0.465452856	0.550663602	1.018382138	1.566288305	0.070980643	0.978054103	FALSE
1171	PF3D7_0901600.iso1.exon2.amp1_1269	0.577075618	0.550250077	-0.026825541	0.972222548	1.339123435	1.552983561	-0.003276502	0.998284684	FALSE
1172	PF3D7_0901800.2o2_8725	0.703226669	1.267669646	0.564442977	0.443813285	1.098226232	1.449506762	0.082332902	0.978054103	FALSE
1173	PF3D7_0902200.2o3_7910	0.271372093	0.349819227	0.078447134	0.883319902	1.076136185	1.059743219	0.012169964	0.996751596	FALSE
1174	PF3D7_0902300.2o3_7037	-0.103137794	-0.183892792	-0.080754999	0.858006742	0.768803697	0.909807555	-0.017129694	0.993519608	FALSE
1175	PF3D7_0902400.iso1.exon2.amp1_1014	-0.516675451	-0.512645578	0.004029873	0.979043375	0.650538624	0.224030565	0.001087046	0.998284684	FALSE
1176	PF3D7_0902600.2o3_8194	-0.509099244	0.029458407	0.53855765	0.445891921	0.758300861	1.407650416	0.104962726	0.978054103	FALSE
1177	PF3D7_0902800.2o4_7652	-0.341354258	-0.035510505	0.305843753	0.61466086	0.634519835	1.237789069	0.070142889	0.978203774	FALSE
1178	PF3D7_0902800.4o4_7941	-0.1051028	0.361475155	0.466577955	0.341675919	0.748081547	0.945003423	0.100671254	0.978054103	FALSE
1179	PF3D7_0902900.1o1_8123	-0.043764509	-0.011495992	0.032268517	0.932692301	0.718053217	0.764113661	0.007435321	0.998284684	FALSE
1180	PF3D7_0903000.1o1_9002	-0.002860266	0.10728639	0.110146656	0.781685792	0.772121745	0.788852013	0.023718102	0.982640702	FALSE
1181	PF3D7_0903000_5973	0.0139843	0.13568213	0.12169783	0.793006262	0.724758946	0.938871612	0.026987556	0.982733913	FALSE
1182	PF3D7_0903300.iso1.exon1.amp3_3123	-0.517423501	-0.399889835	0.117533667	0.691892133	0.403900366	0.601992556	0.045509503	0.978203774	FALSE
1183	PF3D7_0903300.iso1.exon1.amp4_1038	0.187889491	0.321667612	0.133778121	0.852396158	0.924531715	1.474812691	0.022280091	0.993519608	FALSE
1184	PF3D7_0903400.e1s3_8886	-0.204881909	-0.474403316	-0.269521407	0.31879549	0.81341419	0.471446183	-0.057381865	0.978054103	FALSE
1185	PF3D7_0903500.e1s1_7220	1.382430073	1.788103885	0.405673812	0.442512231	1.09950038	1.010302663	0.062032477	0.978054103	FALSE
1186	PF3D7_0903500.e1s2_7214	1.013709401	1.028240331	0.01453093	0.979582612	1.011157515	1.142088858	0.00235923	0.998284684	FALSE
1187	PF3D7_0903700.e3s1_4884	0.309535798	0.091851455	-0.217684343	0.450181785	0.797254557	0.524676685	-0.047011762	0.978054103	FALSE
1188	PF3D7_0903800.iso1.exon2.amp1_1662	-0.759436437	-0.985605958	-0.226169521	0.132864225	0.539228536	0.233345112	-0.07329289	0.912416971	FALSE
1189	PF3D7_0903800.iso1.exon2.amp2_3644	-0.049725831	-0.189196749	-0.139470918	0.725512309	0.809415766	0.781867584	-0.028825787	0.978466981	FALSE
1190	PF3D7_0904900.e1s1_8018	-0.350801008	-0.309378784	0.041422223	0.911572236	0.578315802	0.758121711	0.011487854	0.998284684	FALSE
1191	PF3D7_0904900.e1s3_6567	-0.601550838	-0.277618453	0.323932385	0.29492174	0.484924495	0.587757117	0.108541594	0.978054103	FALSE
1192	PF3D7_0905100.iso1.exon2.amp1_4406	-0.111989623	-0.703280444	-0.59129082	0.000166073	0.679523657	0.155576649	-0.153321623	0.11641693	FALSE
1193	PF3D7_0905100.iso1.exon3.amp1_1647	0.756780284	0.965336582	0.208556298	0.691565175	1.408437289	0.983693532	0.025413129	0.978203774	FALSE
1194	PF3D7_0905300.s5_9157	-0.589951933	0.181418674	0.771370607	0.177802373	0.822732478	1.044356986	0.151210874	0.935734819	FALSE
1195	PF3D7_0905300.s6_8296	0.283205625	0.12460105	-0.158604575	0.740949275	1.011899838	0.940768541	-0.026322352	0.980535118	FALSE
1196	PF3D7_0905300.s7_8001	-0.512932207	-0.169671214	0.343260993	0.444634274	0.660672917	0.883812551	0.083028324	0.978054103	FALSE
1197	PF3D7_0905400.e7s1_7466	0.385321885	-0.089138811	-0.474460696	0.373307357	1.044741137	1.014361804	-0.075932463	0.978054103	FALSE
1198	PF3D7_0905600.2o2_5648	-0.608138883	-0.388991627	0.219147256	0.597982128	0.470551532	0.843343992	0.069543172	0.978203774	FALSE
1199	PF3D7_0905900.iso1.exon1.amp1_3487	-0.306820603	-0.353203767	-0.046383164	0.849652521	0.288812027	0.503651078	-0.024166244	0.993519608	FALSE
1200	PF3D7_0905900.iso1.exon1.amp2_seg1_1439	-0.189509584	-0.234095533	-0.044585949	0.885644848	0.672721516	0.608467715	-0.011159514	0.9967683	FALSE
1201	PF3D7_0906200.1o1_7631	-0.297664233	-0.525911768	-0.228247534	0.465568367	0.925435319	0.559495081	-0.042636721	0.978054103	FALSE
1202	PF3D7_0906300.1o1_4700	0.075247777	-0.132468194	-0.207715971	0.557491336	0.742170429	0.685970207	-0.047028321	0.978054103	FALSE
1203	PF3D7_0906400.e1s1_9120	-0.603959265	-0.689759705	-0.08580044	0.776638244	0.586288694	0.600249197	-0.0243258	0.982640702	FALSE
1204	PF3D7_0906500.1o1_4999	1.330761547	1.672709409	0.341947862	0.66909336	1.2853084	1.605339848	0.043022341	0.978203774	FALSE
1205	PF3D7_0906900.1o2_5563	-0.405483914	-0.50350723	-0.098023316	0.576191291	0.382214191	0.338505811	-0.043265067	0.978203774	FALSE
1206	PF3D7_0907200.e1s2_8934	-0.059583124	-0.098366629	-0.038783504	0.928333388	0.743935258	0.869463678	-0.008517383	0.998284684	FALSE
1207	PF3D7_0907600.iso1.exon2.amp1_4206	-0.569140956	-0.234868299	0.334272656	0.529585721	0.62158157	1.069680191	0.08121528	0.978054103	FALSE
1208	PF3D7_0907700.e1s1_8630	0.015121097	0.510594621	0.495473524	0.236612295	0.873801902	0.765765752	0.095747401	0.956958241	FALSE
1209	PF3D7_0908200.iso1.exon2.amp1_4259	-0.832533893	-0.655871553	0.17666234	0.572182698	0.402989768	0.629935923	0.067826252	0.978054103	FALSE
1210	PF3D7_0908300.iso2.exon2.amp1_3507	-0.209333301	0.311312364	0.520645665	0.326798771	0.417378672	1.036929196	0.165677629	0.978054103	FALSE
1211	PF3D7_0908400.2o2_5815	-0.385617662	-0.662493095	-0.276875433	0.181884461	0.548500708	0.360455802	-0.08691913	0.939531746	FALSE
1212	PF3D7_0908500.e15s1_7738	-0.016469309	-0.450668916	-0.434199607	0.159999618	0.819912053	0.532124034	-0.091244164	0.916954512	FALSE
1213	PF3D7_0908500.e17s1_8622	-0.454160749	-0.596631128	-0.142470379	0.542002081	0.409511686	0.460364506	-0.057152363	0.978054103	FALSE
1214	PF3D7_0908500.e4s1_8616	-0.604804286	-0.637826956	-0.033022669	0.892841858	0.396540546	0.496574148	-0.013461088	0.998284684	FALSE
1215	PF3D7_0908700.iso1.exon6.amp1_4386	-0.493992471	-0.879973403	-0.385980932	0.017064746	0.712967114	0.191955362	-0.095271428	0.61340006	FALSE
1216	PF3D7_0909100.1o1_4745	-0.462783518	-8.22E-05	0.46270132	0.155591333	0.480423308	0.586703744	0.156308247	0.916954512	FALSE
1217	PF3D7_0909500_5686	1.116061269	2.418325413	1.302264144	0.067116005	1.247389432	1.180609033	0.175014758	0.865570079	FALSE
1218	PF3D7_0909600.3o3_8193	-0.307868185	-0.570264696	-0.26239651	0.064667002	0.462286857	0.220274763	-0.098945182	0.865570079	FALSE
1219	PF3D7_0909700.iso1.exon1.amp1_1703	0.857217434	0.696920468	-0.160296966	0.712227218	0.947094637	0.846972191	-0.028527708	0.978203774	FALSE
1220	PF3D7_0909900.iso1.exon1.amp1_1689	-0.158527827	-0.175916284	-0.017388457	0.962651587	0.835387527	0.725495495	-0.003517503	0.998284684	FALSE
1221	PF3D7_0909900.iso1.exon1.amp2_2197	-0.397195034	-0.183621545	0.213573489	0.6285443	0.531575288	0.896467544	0.061003745	0.978203774	FALSE
1222	PF3D7_0910000.iso1.exon1.amp2_1355	-0.458064551	-0.683643148	-0.225578597	0.097759286	0.449679189	0.215265067	-0.087435403	0.912416971	FALSE
1223	PF3D7_0910200.iso1.exon1.amp1_1395	-0.001445107	0.125604717	0.127049824	0.792662645	0.960885282	0.957160613	0.022046418	0.982733913	FALSE
1224	PF3D7_0910400.iso1.exon1.amp2_seg1_2878	-0.574732449	-0.633026015	-0.058293566	0.846698846	0.647653758	0.592121744	-0.015139907	0.993519608	FALSE
1225	PF3D7_0910400.iso1.exon1.amp2_seg2_864	-0.267020842	-0.463834904	-0.196814062	0.366758294	0.66507512	0.381521592	-0.051269255	0.978054103	FALSE
1226	PF3D7_0910900.iso1.exon2.amp1_3342	-0.419947001	0.212321512	0.632268513	0.318540968	0.498946334	1.235069121	0.168572567	0.978054103	FALSE
1227	PF3D7_0911100.e1s1_9127	-0.494483776	-0.845287867	-0.350804091	0.186859838	0.766115402	0.454294726	-0.079223644	0.939531746	FALSE
1228	PF3D7_0911300.e1s2_8013	-0.200572283	-0.350867869	-0.150295587	0.458767594	0.806773555	0.310354498	-0.032631686	0.978054103	FALSE
1229	PF3D7_0911900.2o2_4716	1.520130262	2.469344324	0.949214062	0.069746778	1.109491401	0.867561409	0.145771419	0.867138269	FALSE
1230	PF3D7_0911900.e2_7125	0.391509298	0.94645919	0.554949892	0.4034416	0.877860778	1.304395168	0.09893074	0.978054103	FALSE
1231	PF3D7_0912500.2o7_6421	-0.442742093	-0.514433382	-0.071691289	0.664943448	0.507534743	0.297077524	-0.024452287	0.978203774	FALSE
1232	PF3D7_0912600.iso1.exon1.amp1_741	-0.251033435	-0.465055723	-0.214022289	0.401828373	0.7015115	0.462488928	-0.05252437	0.978054103	FALSE
1233	PF3D7_0912600.iso1.exon2.amp1_4466	-1.041634075	-0.822623347	0.219010729	0.370425674	0.711993615	0.434222494	0.053155261	0.978054103	FALSE
1234	PF3D7_0912800.1o1_8778	-0.386397127	0.01156847	0.397965597	0.431599637	0.733716452	0.994540992	0.086466623	0.978054103	FALSE
1235	PF3D7_0912900.e2s1_6018	-0.338426057	-0.107635267	0.23079079	0.640516759	0.361087949	1.016457981	0.080084286	0.978203774	FALSE
1236	PF3D7_0913500.3o3_7012	-0.450819809	-0.511814931	-0.060995122	0.545972362	0.387586727	0.160085386	-0.027527665	0.978054103	FALSE
1237	PF3D7_0914000.1o1_7665	-0.756949885	-0.97314957	-0.216199685	0.317508474	0.619166377	0.382533455	-0.06030476	0.978054103	FALSE
1238	PF3D7_0914100.iso1.exon1.amp1_2279	-0.795075177	-1.09938503	-0.304309853	0.017719474	0.430458443	0.183924519	-0.123569151	0.61340006	FALSE
1239	PF3D7_0914200.3o4_7023	-0.286499001	-0.360020271	-0.073521269	0.645699367	0.489061506	0.286965538	-0.02602104	0.978203774	FALSE
1240	PF3D7_0914800.1o1_6098	-0.693294165	-1.053993155	-0.36069899	0.096678502	0.635166204	0.354809956	-0.098485799	0.912416971	FALSE
1241	PF3D7_0915300.iso1.exon1.amp1_149	-0.344804014	-0.435257896	-0.090453882	0.721315917	0.498886107	0.501113419	-0.030203602	0.978466981	FALSE
1242	PF3D7_0915400.e1s1_6348	0.26734358	0.841000917	0.573657337	0.348050652	0.919423197	1.179878872	0.100441965	0.978054103	FALSE
1243	PF3D7_0916200.iso1.exon1.amp1_2352	-0.361132868	-0.774454447	-0.413321579	6.11E-05	0.374483208	0.113762589	-0.19399482	0.11641693	FALSE
1244	PF3D7_0916200.iso1.exon2.amp1_2241	-0.30824904	-0.13175071	0.17649833	0.374815198	0.56612777	0.355631278	0.053801677	0.978054103	FALSE
1245	PF3D7_0916200.iso1.exon2.amp2_1904	-0.389025807	-0.293958714	0.095067093	0.747780512	0.576019129	0.585657719	0.027455501	0.980535118	FALSE
1246	PF3D7_0916700.e1s1_6618	-0.381878169	-0.664314024	-0.282435855	0.132475195	0.609184996	0.303630022	-0.080715174	0.912416971	FALSE
1247	PF3D7_0916800.iso1.exon1.amp1_3204	-0.234901337	-0.306201318	-0.071299981	0.597724709	0.568228072	0.197432428	-0.022016048	0.978203774	FALSE
1248	PF3D7_0917000.iso1.exon1.amp2_1923	-0.486049614	-0.561248388	-0.075198775	0.83995674	0.720448726	0.740909727	-0.017340873	0.993519608	FALSE
1249	PF3D7_0917200.2o2_4677	-0.563129671	-0.533117511	0.03001216	0.936158124	0.646494379	0.75556759	0.007584516	0.998284684	FALSE
1250	PF3D7_0917300.1o1_6428	-0.524265713	-0.853624246	-0.329358533	0.013091743	0.531061246	0.172086384	-0.108922528	0.556200725	FALSE
1251	PF3D7_0917500.e1s1_7508	-0.647307771	-0.584271817	0.063035954	0.782004948	0.39458706	0.457304092	0.026131771	0.982640702	FALSE
1252	PF3D7_0917900.e2_8279	-0.156976985	0.289608704	0.446585689	0.292411519	0.668710084	0.805308056	0.108621267	0.978054103	FALSE
1253	PF3D7_0918000.e1s1_8347	-0.115219186	-0.429261938	-0.314042752	0.180487705	0.75879049	0.386357143	-0.072005613	0.938937894	FALSE
1254	PF3D7_0918300.e2s1_6599	0.647547764	0.832749679	0.185201915	0.749258177	0.894182484	1.171651458	0.033221978	0.980535118	FALSE
1255	PF3D7_0918900.e1s1_7198	-0.232860112	0.246357903	0.479218015	0.502155319	0.837807348	1.431148699	0.086554166	0.978054103	FALSE
1256	PF3D7_0918900.e1s2_7481	0.042588607	-0.161719947	-0.204308555	0.372203835	1.113306319	0.257573176	-0.03233321	0.978054103	FALSE
1257	PF3D7_0919200.iso1.exon1.amp1_389	-0.587811593	-0.739163485	-0.151351892	0.492593544	0.448265925	0.425852509	-0.056580418	0.978054103	FALSE
1258	PF3D7_0919400.e1s1_4873	-0.418022128	-0.731699075	-0.313676948	0.356965703	0.455276334	0.662025389	-0.108319393	0.978054103	FALSE
1259	PF3D7_0919800.iso1.exon1.amp1_3111	-0.418649819	0.111603541	0.53025336	0.228504885	0.541058177	0.825750181	0.15246699	0.956958241	FALSE
1260	PF3D7_0919800.iso1.exon1.amp2_seg1_1133	-0.07017297	0.031636637	0.101809607	0.752588995	0.673989005	0.634591301	0.025336136	0.980535118	FALSE
1261	PF3D7_0919900.iso1.exon1.amp1_1105	-0.468862592	-0.659570424	-0.190707832	0.637625182	0.819613443	0.793118444	-0.038917805	0.978203774	FALSE
1262	PF3D7_0919900.iso1.exon1.amp4_1035	-0.331959	-0.375627615	-0.043668615	0.772177582	0.34135183	0.29308955	-0.021639668	0.982640702	FALSE
1263	PF3D7_0920300.1o4_5819	-0.408274314	-0.958158047	-0.549883733	0.130115014	1.390879534	0.5410254	-0.069236923	0.912416971	FALSE
1264	PF3D7_0920400.s1_5698	-0.669710546	-0.85219236	-0.182481813	0.108538236	0.475615139	0.155929689	-0.067373771	0.912416971	FALSE
1265	PF3D7_0920800.e1s1_4875	-0.339473645	-0.566988795	-0.22751515	0.319345448	0.54303042	0.420013719	-0.071441617	0.978054103	FALSE
1266	PF3D7_0920900.iso1.exon2.amp1_3864	-0.277286681	0.070180773	0.347467454	0.583340846	0.576405621	1.290870146	0.083546174	0.978203774	FALSE
1267	PF3D7_0921200.2o6_8242	-0.573325624	-0.993175294	-0.41984967	0.008586644	0.596396503	0.212230166	-0.123473407	0.488837897	FALSE
1268	PF3D7_0921400.e1_5664	-0.544350674	-0.787483074	-0.2431324	0.055806407	0.543446337	0.165221638	-0.078635139	0.839158099	FALSE
1269	PF3D7_0921800.1o3_8466	-0.994560881	-1.031948614	-0.037387733	0.916335883	0.607251486	0.718183235	-0.01004144	0.998284684	FALSE
1270	PF3D7_0922100.e1s2_8955	-1.24619286	-1.493753792	-0.247560932	0.508133433	0.956898019	0.697754938	-0.044286201	0.978054103	FALSE
1271	PF3D7_0922200.e1s1_7191	-0.477463918	-0.664068063	-0.186604144	0.495977216	0.462095858	0.538758096	-0.065998936	0.978054103	FALSE
1272	PF3D7_0922500_7709	-0.504038155	-0.169767781	0.334270374	0.229656195	0.598516972	0.506273237	0.094589943	0.956958241	FALSE
1273	PF3D7_0922800.iso1.exon4.amp3_229	-0.203430544	-0.525000093	-0.321569549	0.140354514	0.714490261	0.352667828	-0.078377109	0.916954512	FALSE
1274	PF3D7_0923800.1.e1s1_7487	0.202147966	0.21651329	0.014365324	0.940387147	0.772105933	0.296479495	0.003259101	0.998284684	FALSE
1275	PF3D7_0923800.iso2.exon1.amp1_446	0.142885172	0.176721505	0.033836333	0.83787476	0.798598971	0.193842376	0.007462532	0.992768398	FALSE
1276	PF3D7_0924000.iso1.exon1.amp1_3692	-0.597719398	-0.502188182	0.095531216	0.8449849	0.618610973	1.002678667	0.023685844	0.993519608	FALSE
1277	PF3D7_0924000.iso1.exon1.amp2_3981	-0.715592549	-0.058864977	0.656727572	0.239040586	0.451665751	1.057477394	0.198000948	0.956958241	FALSE
1278	PF3D7_0924000.iso1.exon2.amp1_2373	-0.471251268	-0.657034676	-0.185783409	0.41135621	0.532741309	0.423154027	-0.059351593	0.978054103	FALSE
1279	PF3D7_0924200.iso1.exon1.amp1_2570	-0.373163153	-0.658409348	-0.285246195	0.051381273	0.517243235	0.217544209	-0.096427508	0.820283309	FALSE
1280	PF3D7_0924600.iso1.exon1.amp1_2177	0.68363309	1.326017018	0.642383928	0.366540494	0.865867043	1.39068622	0.114045567	0.978054103	FALSE
1281	PF3D7_0924600.iso1.exon2.amp2_seg1_2289	-0.560115642	-0.723802508	-0.163686866	0.439786935	0.468987535	0.401845061	-0.059048898	0.978054103	FALSE
1282	PF3D7_0925300.1o1_6180	-0.450073044	-1.049087135	-0.599014091	0.000121216	0.775921267	0.066570732	-0.136409522	0.11641693	FALSE
1283	PF3D7_0925800.e1s1_9121	-0.533576618	-0.435746798	0.09782982	0.744998536	0.680010013	0.583912832	0.024335285	0.980535118	FALSE
1284	PF3D7_0925900.e2s1_8042	-0.481439825	-0.852130683	-0.370690858	0.034176179	0.479463415	0.270563985	-0.134031055	0.733931777	FALSE
1285	PF3D7_0926200.iso1.exon1.amp1_3505	-0.112447995	-0.61612671	-0.503678715	0.06215101	0.804630625	0.427582408	-0.108755005	0.862760147	FALSE
1286	PF3D7_0926500.iso1.exon1.amp2_2495	-0.300754075	-0.581109095	-0.280355021	0.05710495	0.485495892	0.226091003	-0.100725546	0.848192638	FALSE
1287	PF3D7_0927300.e1s1_7797	-0.765985128	-0.854095922	-0.088110794	0.681613126	0.883357774	0.322423928	-0.017487637	0.978203774	FALSE
1288	PF3D7_0927700.1o1_7283	-0.447955433	-0.668300161	-0.220344728	0.236707284	0.808105504	0.253290614	-0.047908128	0.956958241	FALSE
1289	PF3D7_0927800.2o2_4680	-0.587867617	-0.806946158	-0.219078541	0.23054507	0.545296272	0.313472145	-0.069598927	0.956958241	FALSE
1290	PF3D7_0927900.1o1_4984	-0.593489196	-0.914351953	-0.320862757	0.003707188	0.399408986	0.143589554	-0.140879048	0.346498541	FALSE
1291	PF3D7_0928600.1o1_6100	-0.698598557	-0.590077686	0.108520871	0.739958625	0.798373956	0.625940847	0.02315566	0.980535118	FALSE
1292	PF3D7_0928700.iso1.exon1.amp1_3151	-0.742101728	-0.356737316	0.385364412	0.292346087	0.320137281	0.706579815	0.167761844	0.978054103	FALSE
1293	PF3D7_0929000.2o2_8472	-0.194892827	0.272521602	0.46741443	0.322791995	0.517122233	0.917061473	0.135375573	0.978054103	FALSE
1294	PF3D7_0929000.e2_5102	-0.369355437	0.247501581	0.616857018	0.263015128	0.997197849	1.028677751	0.102733016	0.978054103	FALSE
1295	PF3D7_0929600.2o2_4963	-0.67371995	-0.683738435	-0.010018486	0.963059724	0.797017201	0.357401385	-0.002194668	0.998284684	FALSE
1296	PF3D7_0929800.iso1.exon1.amp1_4123	-0.23753043	-0.23863889	-0.00110846	0.997259416	0.526499907	0.65400604	-0.00034076	0.999164392	FALSE
1297	PF3D7_0929900.iso1.exon1.amp1_1496	-0.278553777	-0.551108304	-0.272554527	0.057565093	0.454633967	0.222906058	-0.104420938	0.848192638	FALSE
1298	PF3D7_0930100.iso1.exon1.amp2_192	-0.422391324	-0.842154997	-0.419763674	0.001291223	0.631512656	0.107545074	-0.117290283	0.241372595	FALSE
1299	PF3D7_0930200.iso1.exon4.amp1_2997	-0.371968623	-0.682134352	-0.310165728	0.121959289	0.55342985	0.336655544	-0.096858451	0.912416971	FALSE
1300	PF3D7_0930300.s1_9167	-0.270377507	0.017296507	0.287674014	0.707617427	0.869669232	1.570362392	0.049287482	0.978203774	FALSE
1301	PF3D7_0930300.s2_8884	1.038812951	1.583423503	0.544610552	0.477530411	1.144008369	1.515410951	0.076211399	0.978054103	FALSE
1302	PF3D7_0930600.iso1.exon5.amp1_2100	-0.454686734	0.155368939	0.610055673	0.202929955	0.586449436	0.88865546	0.162095466	0.956958241	FALSE
1303	PF3D7_0930700.iso1.exon1.amp1_702	-0.586972749	-0.329380549	0.2575922	0.510598508	0.47590493	0.784632551	0.082664722	0.978054103	FALSE
1304	PF3D7_0930700.iso1.exon2.amp1_2944	-0.453443997	-0.758820423	-0.305376427	0.045903115	0.361559121	0.244203672	-0.145224144	0.811348251	FALSE
1305	PF3D7_0931300.1o1_6427	-0.679756518	-0.271487669	0.408268849	0.142195364	0.672878338	0.481748623	0.103979784	0.916954512	FALSE
1306	PF3D7_0931300_6263	-0.79152215	-0.53863404	0.25288811	0.208443849	0.50919537	0.355353905	0.085238573	0.956958241	FALSE
1307	PF3D7_0931400.3o4_4980	-0.059248833	-0.360007995	-0.300759162	0.175512942	0.722834087	0.364397861	-0.072412628	0.928562811	FALSE
1308	PF3D7_0931600.iso1.exon2.amp1_2996	-0.530270129	-0.171039532	0.359230596	0.518096639	0.505033631	1.12387929	0.098821433	0.978054103	FALSE
1309	PF3D7_0931700.2o3_7353	-0.596850373	0.398638033	0.995488406	0.182823625	0.824116606	1.374676675	0.183932841	0.939531746	FALSE
1310	PF3D7_0931800.e1s1_7757	-0.41984439	-0.668869895	-0.249025504	0.190236598	0.490418456	0.33289147	-0.087285564	0.941095042	FALSE
1311	PF3D7_0932100.2o5_9117	-0.234643063	-0.031285762	0.203357301	0.622835421	0.489205135	0.839715711	0.062820927	0.978203774	FALSE
1312	PF3D7_0932300.e1s1_4887	-0.362407019	-0.12281144	0.239595579	0.567491693	0.521189906	0.844815075	0.070508043	0.978054103	FALSE
1313	PF3D7_0932700.iso1.exon1.amp2_4526	-0.380929889	-0.909905167	-0.528975278	0.008794266	1.038015075	0.13779841	-0.089986819	0.488837897	FALSE
1314	PF3D7_0933100.4o4_8227	-0.430041778	-0.766664598	-0.336622821	0.053475231	0.583149433	0.265132143	-0.100750941	0.820283309	FALSE
1315	PF3D7_0933500.s1_5707	-0.231099922	-0.404466521	-0.173366599	0.396746293	0.648672699	0.354469333	-0.046388156	0.978054103	FALSE
1316	PF3D7_0933600.e1s1_8054	-0.381998657	-0.578786485	-0.196787828	0.270358907	0.580129747	0.300357223	-0.058984974	0.978054103	FALSE
1317	PF3D7_0933900.4o4_5828	0.003307563	0.708297775	0.704990212	0.16029551	0.898822243	0.899893327	0.130707496	0.916954512	FALSE
1318	PF3D7_0934300.1o1_7830	-0.504848263	-0.611579832	-0.106731569	0.55132598	0.530962763	0.322823136	-0.034741211	0.978054103	FALSE
1319	PF3D7_0935600.1o2_7901	0.129172289	1.007661106	0.878488817	0.224781982	1.44059436	1.324220351	0.102521877	0.956958241	FALSE
1320	PF3D7_0935800.e1_5085	-0.639600727	-0.458963831	0.180636897	0.22976433	0.560322867	0.234422981	0.056375879	0.956958241	FALSE
1321	PF3D7_0935800.e2_5959	-0.530943242	-0.743517556	-0.212574314	0.225701731	0.431039342	0.313384531	-0.084435521	0.956958241	FALSE
1322	PF3D7_0935800.e9_9148	0.453442194	0.919337461	0.465895268	0.395548209	1.055699108	1.049823832	0.073597806	0.978054103	FALSE
1323	PF3D7_0935900.e1s1_8599	-0.191129349	-0.384834648	-0.193705298	0.673483805	0.742505677	0.922309046	-0.04222506	0.978203774	FALSE
1324	PF3D7_0935900.e2s1_9232	0.268975269	1.764592857	1.495617588	0.021831693	1.363466246	0.985837538	0.18786914	0.658237274	FALSE
1325	PF3D7_0936200.2o2_4952	-0.417747193	-0.251854376	0.165892817	0.687875697	0.805180005	0.815236543	0.034290809	0.978203774	FALSE
1326	PF3D7_0936300.2o2_8152	1.234321442	2.03023362	0.795912178	0.288275316	0.980316457	1.432535846	0.127511249	0.978054103	FALSE
1327	PF3D7_0936400.2o2_8989	-0.421451559	0.116948367	0.538399925	0.254395973	0.604207072	0.893619832	0.13959083	0.973160038	FALSE
1328	PF3D7_0936500.iso1.exon1.amp1_973	-0.622415846	-0.85720318	-0.234787334	0.462055745	0.622666814	0.616689923	-0.062911372	0.978054103	FALSE
1329	PF3D7_0936600.2o2_6426	-0.598981235	0.235716666	0.834697901	0.078671066	0.456920559	0.799007047	0.274677304	0.912416971	FALSE
1330	PF3D7_0936700.1o1_7018	-0.231866038	-0.673527788	-0.44166175	0.033038443	0.915187526	0.252337451	-0.084908455	0.732475596	FALSE
1331	PF3D7_0936800.e2s1_5455	0.236155835	0.399924877	0.163769042	0.665609847	0.931589562	0.721613896	0.029972823	0.978203774	FALSE
1332	PF3D7_0937000.2o2_6410	-0.570339529	-1.175673596	-0.605334067	0.053047015	1.031001662	0.478114498	-0.102423727	0.820283309	FALSE
1333	PF3D7_0937200.1o1_7291	-0.101635555	-0.572172482	-0.470536927	0.134916117	0.665516696	0.550258097	-0.119964942	0.912416971	FALSE
1334	PF3D7_0937300.iso1.exon2.amp1_3309	-0.201945748	0.004654123	0.206599871	0.781334472	0.79538317	1.533099808	0.037944416	0.982640702	FALSE
1335	PF3D7_0937400.iso1.exon2.amp1_1296	0.475790935	0.521072907	0.045281972	0.942444781	0.996640342	1.273171933	0.007319823	0.998284684	FALSE
1336	PF3D7_0937500.iso1.exon1.amp1_4176	-0.16412764	0.712497028	0.876624669	0.256180851	1.278562243	1.445991919	0.112540808	0.97539016	FALSE
1337	PF3D7_0937600.iso1.exon1.amp1_2479	-0.533988184	-0.764946107	-0.230957924	0.428185977	0.630679357	0.553652485	-0.061827027	0.978054103	FALSE
1338	PF3D7_0937600.iso1.exon2.amp1_3322	0.984048193	1.668881707	0.684833514	0.138245177	0.775745176	0.81955481	0.146194315	0.916954512	FALSE
1339	PF3D7_0937700.iso1.exon2.amp1_713	0.870052621	1.596600608	0.726547987	0.239129778	1.077268114	1.145888028	0.111593923	0.956958241	FALSE
1340	PF3D7_0937800.iso1.exon1.amp1_2169	-0.50977854	0.200857153	0.710635693	0.317047181	0.665211786	1.379929276	0.152281677	0.978054103	FALSE
1341	PF3D7_0937800.iso1.exon2.amp1_1654	-0.115629845	-0.349190432	-0.233560587	0.421324818	0.636785681	0.550121774	-0.062010229	0.978054103	FALSE
1342	PF3D7_1000100.iso1.exon2.amp1_3908	1.368694575	2.644493447	1.275798872	0.039633113	1.296201405	0.982442414	0.168064514	0.778685174	FALSE
1343	PF3D7_1000200.iso1.exon1.amp1_1575	2.039595443	2.706384288	0.666788845	0.366851542	1.248796013	1.422018104	0.0875595	0.978054103	FALSE
1344	PF3D7_1000300.iso1.exon1.amp1_3601	-0.065357847	0.30906597	0.374423817	0.529162862	0.747536919	1.193714949	0.077103679	0.978054103	FALSE
1345	PF3D7_1000400.iso1.exon1.amp1_1864	0.132994478	0.702618133	0.569623655	0.489146037	1.054451691	1.642282944	0.083652338	0.978054103	FALSE
1346	PF3D7_1000500.iso1.exon3.amp1_4465	0.503382745	0.98813014	0.484747394	0.478349186	1.127415825	1.343028156	0.070048282	0.978054103	FALSE
1347	PF3D7_1001300.2o2_6130	0.013636208	0.409250219	0.395614012	0.294930518	1.238279559	0.636166623	0.055568593	0.978054103	FALSE
1348	PF3D7_1001500.1o1_6967	0.639581528	0.471465159	-0.16811637	0.865787898	1.676885159	2.007138387	-0.016321468	0.994889069	FALSE
1349	PF3D7_1001600.2o2_4757	-0.410920909	0.254310475	0.665231384	0.216608113	0.582795647	1.007178746	0.172184602	0.956958241	FALSE
1350	PF3D7_1001700.2o2_9009	-1.203786157	-1.078827778	0.124958378	0.764730681	1.357872742	0.735185119	0.015977794	0.982640702	FALSE
1351	PF3D7_1001900.2o2_7282	-0.014053292	-0.186639633	-0.172586341	0.51645383	0.713185681	0.491326983	-0.041563678	0.978054103	FALSE
1352	PF3D7_1002100.2o2_7048	2.33906682	2.575125878	0.236059058	0.647978811	1.0550168	1.012574648	0.037455933	0.978203774	FALSE
1353	PF3D7_1002500.1o3_8986	0.407783424	0.102283978	-0.305499445	0.477410344	1.075153005	0.803010088	-0.048565554	0.978054103	FALSE
1354	PF3D7_1002800.e1s2_6354	-0.423356906	-0.557156527	-0.133799622	0.476344972	0.509602195	0.344608885	-0.045141712	0.978054103	FALSE
1355	PF3D7_1003100.iso1.exon3.amp1_38	-0.651578213	-0.967038599	-0.315460386	0.15330129	0.427959812	0.392676531	-0.123947818	0.916954512	FALSE
1356	PF3D7_1003400.iso1.exon1.amp3_seg2_2299	-0.122222946	-0.141897359	-0.019674414	0.971124127	0.794860639	1.109664365	-0.003923667	0.998284684	FALSE
1357	PF3D7_1003600.e1s1_8919	-0.42506782	-0.427865866	-0.002798046	0.991164252	0.535921176	0.498097623	-0.000876826	0.998284684	FALSE
1358	PF3D7_1003800.e1s2_7780	1.032721873	0.879378544	-0.153343328	0.665292227	0.956028171	0.661211624	-0.027542839	0.978203774	FALSE
1359	PF3D7_1004200.e2s2_6055	-1.137684405	-1.41854103	-0.280856625	0.221360223	0.838504334	0.361692705	-0.058534474	0.956958241	FALSE
1360	PF3D7_1004300.iso1.exon1.amp2_2505	-0.690600454	-0.846895102	-0.156294648	0.553054296	0.658105242	0.495972419	-0.040567648	0.978054103	FALSE
1361	PF3D7_1004800.2o3_6717	0.005572127	-0.477329066	-0.482901193	0.019813626	0.583379694	0.308827867	-0.143831996	0.631334189	FALSE
1362	PF3D7_1005000.1o1_7075	-0.242345039	-0.433524958	-0.191179919	0.461795289	0.648670199	0.484396325	-0.050374567	0.978054103	FALSE
1363	PF3D7_1005300.2o2_8452	-0.563431185	-0.6342166	-0.070785416	0.78045306	0.399753277	0.513582684	-0.028500012	0.982640702	FALSE
1364	PF3D7_1005500.e2s1_9236	-0.127883733	-0.511276529	-0.383392796	0.132302794	0.797912209	0.416741083	-0.083528165	0.912416971	FALSE
1365	PF3D7_1005700.iso1.exon2.amp1_3583	-0.27944141	-0.368402136	-0.088960727	0.687994888	0.319295522	0.448168596	-0.044118919	0.978203774	FALSE
1366	PF3D7_1006000.iso1.exon2.amp1_1866	-0.137025298	-0.047700608	0.089324691	0.826462649	0.808460693	0.807969104	0.018415804	0.989130662	FALSE
1367	PF3D7_1006500.1o1_7278	0.025983792	0.560415694	0.534431902	0.338767239	0.799098398	1.078525432	0.106701451	0.978054103	FALSE
1368	PF3D7_1007000.iso1.exon8.amp1_631	-0.27937786	-0.269984052	0.009393808	0.977793904	1.044104921	0.608691315	0.001557715	0.998284684	FALSE
1369	PF3D7_1007300.iso1.exon1.amp1_3315	-0.347683369	0.481789613	0.829472982	0.219647647	0.668104715	1.26764622	0.182262789	0.956958241	FALSE
1370	PF3D7_1007700.e1s1_6640	0.747074085	0.222724051	-0.524350033	0.352614868	1.116190033	1.06840664	-0.078661627	0.978054103	FALSE
1371	PF3D7_1007700.e1s2_8091	2.444998474	3.142028072	0.697029597	0.1883172	0.989670813	0.960266273	0.117767714	0.941095042	FALSE
1372	PF3D7_1007800.iso1.exon1.amp1_1414	-0.631605249	-1.010808474	-0.379203225	0.051684816	0.738653457	0.27929854	-0.089951783	0.820283309	FALSE
1373	PF3D7_1008000.s2_8597	0.163979524	0.148600455	-0.015379069	0.954027347	0.741758964	0.498054107	-0.003566048	0.998284684	FALSE
1374	PF3D7_1008100.s1_7726	0.713029412	0.561172026	-0.151857386	0.733803064	0.761144361	0.89552561	-0.032564061	0.980535118	FALSE
1375	PF3D7_1008100.s3_5986	-0.081051538	-0.041412833	0.039638705	0.94345751	0.781394923	1.143733379	0.007964301	0.998284684	FALSE
1376	PF3D7_1008200.iso1.exon1.amp1_2743	-0.525893467	-0.649694919	-0.123801453	0.488368102	0.567550768	0.312465291	-0.037850424	0.978054103	FALSE
1377	PF3D7_1008400.e1s1_5157	-0.679384127	-1.17930445	-0.499920323	0.147513601	1.033088292	0.575828311	-0.083929593	0.916954512	FALSE
1378	PF3D7_1008600.1o1_6726	-0.548320206	-0.500196743	0.048123463	0.789589872	0.433729653	0.346967086	0.018873499	0.982733913	FALSE
1379	PF3D7_1008700.e3s1_6589	-0.779446975	-0.589548957	0.189898018	0.681716732	0.828369633	0.92177968	0.037711306	0.978203774	FALSE
1380	PF3D7_1008800.e1s1_8915	-0.868379395	-0.70189622	0.166483175	0.486558067	0.588115079	0.448773124	0.048314423	0.978054103	FALSE
1381	PF3D7_1009000.1o1_8727	0.134892588	0.157190634	0.022298046	0.92999199	0.749919349	0.465108143	0.005134279	0.998284684	FALSE
1382	PF3D7_1009300.iso1.exon1.amp1_1604	-0.445504647	-0.132964066	0.312540582	0.474570711	0.322088035	0.881071266	0.123303374	0.978054103	FALSE
1383	PF3D7_1009500.e3_5958	-0.584133643	-0.460211145	0.123922497	0.701477823	0.642742693	0.637342495	0.032163689	0.978203774	FALSE
1384	PF3D7_1009600.iso1.exon3.amp1_2459	-0.420986575	0.219277774	0.64026435	0.202132422	0.873995106	0.919058252	0.121384096	0.956958241	FALSE
1385	PF3D7_1010200.iso1.exon1.amp2_1917	-0.619580576	-0.29504879	0.324531787	0.418978054	0.468213261	0.794376713	0.105074931	0.978054103	FALSE
1386	PF3D7_1010900.iso1.exon2.amp1_108	-0.350082321	-0.354445013	-0.004362692	0.990936351	0.633862166	0.777593655	-0.001116234	0.998284684	FALSE
1387	PF3D7_1011300.1o1_5319	-0.747728588	-0.720486144	0.027242444	0.952712684	0.643887299	0.94009876	0.00664607	0.998284684	FALSE
1388	PF3D7_1011400.1o1_6697	-0.626154753	-0.729044849	-0.102890095	0.649500752	0.566288329	0.429216396	-0.031024299	0.978203774	FALSE
1389	PF3D7_1011500.1o1_7558	-0.538793084	-0.838621795	-0.299828711	0.309122165	0.998466662	0.490754303	-0.052300328	0.978054103	FALSE
1390	PF3D7_1011700 (renamed)_6433	0.236705512	0.053454349	-0.183251163	0.672594046	1.155957176	0.811611794	-0.027198529	0.978203774	FALSE
1391	PF3D7_1011800.e1s2_7200	-0.202113151	0.240897668	0.443010819	0.250944607	0.702548013	0.7172415	0.104850299	0.968457025	FALSE
1392	PF3D7_1011900.iso1.exon4.amp1_2357	-0.480372303	-0.724275746	-0.243903443	0.311829694	0.603639949	0.438806795	-0.069179165	0.978054103	FALSE
1393	PF3D7_1012000.iso1.exon1.amp1_2737	-0.616289213	-0.568484624	0.04780459	0.796113351	0.456923096	0.354197667	0.017837108	0.982733913	FALSE
1394	PF3D7_1012000.iso1.exon9.amp1_3295	-0.493308881	-0.666647725	-0.173338844	0.365262605	0.41430913	0.359860026	-0.070701315	0.978054103	FALSE
1395	PF3D7_1012100.iso1.exon1.amp1_2444	-0.696397444	-0.866169966	-0.169772522	0.427834681	0.371699934	0.415827898	-0.075082387	0.978054103	FALSE
1396	PF3D7_1012200.1o2_8148	0.224285361	0.281077976	0.056792615	0.939655025	1.332322926	1.50893752	0.006995445	0.998284684	FALSE
1397	PF3D7_1012400.e3s1_5724	-0.372743064	-0.669832235	-0.297089171	0.041711347	0.53640836	0.210459625	-0.096978973	0.793293038	FALSE
1398	PF3D7_1012500.e1s1_9230	-0.585054148	-0.908741648	-0.323687499	0.098386802	0.732587404	0.292021524	-0.077342963	0.912416971	FALSE
1399	PF3D7_1012600.e1s1_9222	-0.833299696	-1.019786134	-0.186486438	0.33311568	0.585681075	0.335732149	-0.055165828	0.978054103	FALSE
1400	PF3D7_1012700.e1s1_7980	1.340708931	0.983319579	-0.357389352	0.4700573	1.017017728	0.951189633	-0.05898008	0.978054103	FALSE
1401	PF3D7_1012700.e1s2_6240	-0.326189059	-0.397059586	-0.070870527	0.790535067	0.768208511	0.491544907	-0.01590646	0.982733913	FALSE
1402	PF3D7_1013100.1o2_5076	-0.745650583	-0.69084299	0.054807594	0.815221819	0.62304205	0.44200786	0.015083415	0.985718836	FALSE
1403	PF3D7_1013100.2o2_4787	-0.325744223	-0.239062179	0.086682044	0.583947379	0.450163974	0.289548354	0.033192084	0.978203774	FALSE
1404	PF3D7_1013200.iso1.exon1.amp1_4310	-0.414796233	-0.521579987	-0.106783754	0.796581158	0.585939302	0.843949785	-0.028708422	0.982733913	FALSE
1405	PF3D7_1013200.iso1.exon1.amp2_2506	-0.196088796	-0.221362621	-0.025273825	0.939745197	0.638511526	0.667595184	-0.006563183	0.998284684	FALSE
1406	PF3D7_1013400.iso1.exon9.amp1_3307	-0.329908357	-0.513345882	-0.183437525	0.508507284	0.806245835	0.501152494	-0.039282911	0.978054103	FALSE
1407	PF3D7_1013700.iso1.exon1.amp1_3828	-0.353418004	-0.059684243	0.293733761	0.622651286	0.678353149	1.213939526	0.064686181	0.978203774	FALSE
1408	PF3D7_1013900.iso1.exon1.amp2_seg2_4622	0.182743097	-0.241418798	-0.424161895	0.368499809	0.804944889	0.907388975	-0.086532339	0.978054103	FALSE
1409	PF3D7_1014000.iso1.exon6.amp1_1249	-0.20075024	-0.409605773	-0.208855532	0.012289859	0.260625707	0.11926928	-0.139843551	0.546996251	FALSE
1410	PF3D7_1014000.iso1.exon7.amp1_955	-0.507908725	-0.820520054	-0.312611329	0.101178483	0.728545429	0.280993558	-0.075157509	0.912416971	FALSE
1411	PF3D7_1014100.s1_5371	0.274995906	1.479019682	1.204023776	0.159322822	1.236378792	1.544728618	0.15747151	0.916954512	FALSE
1412	PF3D7_1014100.s2_5660	0.877693287	1.470860825	0.593167538	0.139569274	1.106587129	0.680190297	0.092596836	0.916954512	FALSE
1413	PF3D7_1014300.e1s3_6628	-0.535613913	-0.327437151	0.208176762	0.451770294	0.484257857	0.53893997	0.070716823	0.978054103	FALSE
1414	PF3D7_1014500.iso1.exon1.amp2_3369	-0.484061543	-0.698219406	-0.214157864	0.335819134	0.620507087	0.397513728	-0.059504372	0.978054103	FALSE
1415	PF3D7_1014600 (renamed, has duplicates)_5653	-0.328845395	-0.451836857	-0.122991463	0.665341644	0.680946647	0.544169065	-0.030726263	0.978203774	FALSE
1416	PF3D7_1014600.e1s2_7100	-0.114477294	-0.00713877	0.107338524	0.826680089	0.740007234	0.995981585	0.02315382	0.989130662	FALSE
1417	PF3D7_1014600.e1s3_8257	0.068729723	0.34690062	0.278170897	0.61185574	0.587541641	1.115812593	0.069484736	0.978203774	FALSE
1418	PF3D7_1014800.6o11_8787	-0.314850248	-0.686179513	-0.371329265	0.11426439	0.666777907	0.39090165	-0.096398169	0.912416971	FALSE
1419	PF3D7_1014800.7o11_8498	-0.215224119	-0.472433848	-0.257209728	0.282532605	0.568936996	0.43636319	-0.077133081	0.978054103	FALSE
1420	PF3D7_1014900.iso1.exon1.amp1_3710	-0.454871917	-0.534613577	-0.07974166	0.822529964	0.564504894	0.719748677	-0.022765259	0.98765431	FALSE
1421	PF3D7_1015100.1o1_9044	-0.44172434	0.359712605	0.801436944	0.292995446	0.765344796	1.468499869	0.153190398	0.978054103	FALSE
1422	PF3D7_1015200.iso1.exon3.amp1_1792	-0.341552064	-0.779282165	-0.437730101	0.020223147	0.446439169	0.283676298	-0.169113138	0.637142736	FALSE
1423	PF3D7_1015500.1o1_8772	-0.309416062	-0.140895443	0.168520619	0.748314152	0.663914391	1.073432487	0.038955519	0.980535118	FALSE
1424	PF3D7_1015900.e2s1_5752	0.219058915	0.024666947	-0.194391968	0.483226171	0.948368903	0.469154964	-0.03569299	0.978054103	FALSE
1425	PF3D7_1016000.iso1.exon1.amp1_1018	-0.647962427	-0.818027841	-0.170065414	0.534437545	0.454326731	0.541254507	-0.060983028	0.978054103	FALSE
1426	PF3D7_1016200.1o1_8491	0.299552448	0.709879459	0.410327011	0.483437179	0.914335426	1.155069532	0.072435548	0.978054103	FALSE
1427	PF3D7_1016300.e1s1_5130	-0.434463912	-0.266493272	0.16797064	0.832360726	1.35374654	1.598056628	0.020241939	0.989130662	FALSE
1428	PF3D7_1016500.e1s1_7472	-0.123641331	-0.09543491	0.028206421	0.933964847	0.665182479	0.677909315	0.00705222	0.998284684	FALSE
1429	PF3D7_1016500.e2s1_8376	-0.533821922	-0.619459806	-0.085637884	0.785363659	0.51937538	0.633809809	-0.026763296	0.982733913	FALSE
1430	PF3D7_1016700.iso1.exon2.amp1_3820	-0.53025816	-0.701802389	-0.17154423	0.353778025	0.378682483	0.349228791	-0.076135503	0.978054103	FALSE
1431	PF3D7_1016900.e1s1_4855	-0.1444489	-0.635980531	-0.491531631	0.016587715	0.908794272	0.241242189	-0.095193349	0.61340006	FALSE
1432	PF3D7_1017000.e1s1_7482	-0.230490171	-0.270046121	-0.03955595	0.917876653	0.686708693	0.77083979	-0.009464614	0.998284684	FALSE
1433	PF3D7_1017000.e1s2_7193	-0.185466884	0.093403522	0.278870405	0.397178751	0.435500594	0.646034746	0.100247041	0.978054103	FALSE
1434	PF3D7_1017100.1o1_6988	0.541069313	0.455600333	-0.085468981	0.833606818	0.817800007	0.805732825	-0.017446893	0.989130662	FALSE
1435	PF3D7_1017300.1.2o2_6764	0.107589613	-0.224308379	-0.331897992	0.34651197	0.714467831	0.665306645	-0.078001095	0.978054103	FALSE
1436	PF3D7_1017800.iso1.exon3.amp1_1681	-0.142159391	-0.310272831	-0.16811344	0.35612051	0.59712371	0.3098569	-0.048952451	0.978054103	FALSE
1437	PF3D7_1017800.iso1.exon3.amp2_1970	-0.482845063	-0.69019371	-0.207348647	0.162462196	0.534000963	0.232083773	-0.067844819	0.922153839	FALSE
1438	PF3D7_1017900.e2s1_5746	-0.437804358	-0.716001687	-0.278197329	0.051866568	0.459611359	0.220047612	-0.105500102	0.820283309	FALSE
1439	PF3D7_1018000.1o1_8202	-0.648656701	-0.759663744	-0.111007043	0.783479718	0.608007963	0.819517984	-0.02913581	0.982640702	FALSE
1440	PF3D7_1018100.1o1_6997	-0.45707442	-0.503176306	-0.046101885	0.880038265	0.579203676	0.609794912	-0.013186691	0.996647775	FALSE
1441	PF3D7_1018300.e1s1_5945	-0.263265147	-0.140403206	0.122861941	0.875449783	0.975990128	1.611173527	0.0192194	0.995846326	FALSE
1442	PF3D7_1018300.e2s2_5481	-0.435519443	-0.853021663	-0.417502219	0.079107242	0.636085206	0.389741125	-0.113399229	0.912416971	FALSE
1443	PF3D7_1019000.e1s1_6639	0.038087706	-0.257125668	-0.295213374	0.281105995	0.868264689	0.466067951	-0.059050764	0.978054103	FALSE
1444	PF3D7_1019000.e1s2_6350	-0.597581156	-0.521741414	0.075839742	0.703793046	0.507908752	0.377926805	0.025527315	0.978203774	FALSE
1445	PF3D7_1019300.iso1.exon1.amp2_1043	0.138375126	-0.085569442	-0.223944568	0.649716846	0.957085873	0.971489393	-0.03893211	0.978203774	FALSE
1446	PF3D7_1019400.e2s1_9178	-0.448440072	-0.685501463	-0.237061391	0.259552292	0.531535357	0.377333777	-0.076469515	0.976799056	FALSE
1447	PF3D7_1019500.1.6o25_6176	-0.041146364	-0.234274316	-0.193127953	0.615104803	0.949686086	0.728161023	-0.034696996	0.978203774	FALSE
1448	PF3D7_1019500.1.9o25_6465	-0.689090947	-0.822117215	-0.133026268	0.684518699	0.561579006	0.654309337	-0.038718301	0.978203774	FALSE
1449	PF3D7_1020200.e2s1_4857	-0.181726879	-0.309159921	-0.127433042	0.59496789	0.524213223	0.463193492	-0.041018371	0.978203774	FALSE
1450	PF3D7_1020200.e3s1_5754	-0.606370655	-0.467084667	0.139285988	0.572982567	0.391714726	0.492198886	0.05744481	0.978054103	FALSE
1451	PF3D7_1020300.e1s1_7784	-0.136184917	0.659935249	0.796120166	0.110860545	0.990902343	0.86265004	0.135743165	0.912416971	FALSE
1452	PF3D7_1020500.1o1_4727	-0.459399232	-0.145249244	0.314149989	0.471470421	0.395609336	0.87618214	0.110524444	0.978054103	FALSE
1453	PF3D7_1020700.e1s1_7201	-0.587517481	-0.535771149	0.051746332	0.791042614	0.316538244	0.394305498	0.026447377	0.982733913	FALSE
1454	PF3D7_1020700.e1s2_8363	-0.469696044	-0.068323715	0.401372329	0.323118473	0.706843012	0.772702446	0.09363062	0.978054103	FALSE
1455	PF3D7_1020800.11o11_6470	-0.39707538	-0.635000798	-0.237925418	0.347754188	0.712215467	0.45270721	-0.057617669	0.978054103	FALSE
1456	PF3D7_1021000.iso1.exon2.amp1_3284	-0.559859249	-0.743763073	-0.183903824	0.381173916	0.464617264	0.394694619	-0.067014053	0.978054103	FALSE
1457	PF3D7_1021000.iso1.exon4.amp1_1510	-0.466403797	0.042339218	0.508743015	0.324880973	0.439481726	1.007673786	0.158964808	0.978054103	FALSE
1458	PF3D7_1021200.1o1_6485	0.641509878	0.741575314	0.100065435	0.843980648	0.942470508	1.016458862	0.017537327	0.993519608	FALSE
1459	PF3D7_1021500.iso1.exon1.amp1_154	-0.416332549	-0.279601174	0.136731375	0.640471823	0.659144633	0.565257504	0.035092616	0.978203774	FALSE
1460	PF3D7_1021600.e1s1_6028	-0.251615885	-0.297871274	-0.046255389	0.8883343	0.811977726	0.632443726	-0.009708911	0.9967683	FALSE
1461	PF3D7_1021700.e1s2_6931	0.026111817	0.02858831	0.002476493	0.994737622	0.719543745	0.749680716	0.00057092	0.999164392	FALSE
1462	PF3D7_1021700.e1s3_8087	-1.026074539	-0.639914179	0.386160361	0.348056135	0.725429571	0.786486416	0.087867756	0.978054103	FALSE
1463	PF3D7_1021700.e2s2_7510	-0.467942123	-0.063830348	0.404111775	0.447957573	0.751113316	1.050926018	0.085248704	0.978054103	FALSE
1464	PF3D7_1021700.e3s1_8324	0.302630463	0.359526479	0.056896015	0.91790281	0.817336117	1.125440163	0.011064221	0.998284684	FALSE
1465	PF3D7_1021800.iso1.exon2.amp1_3703	0.708038103	0.79169038	0.083652278	0.881199644	0.986180499	1.125565788	0.013905543	0.996726019	FALSE
1466	PF3D7_1021900.e1s2_5472	0.664690635	0.914153982	0.249463348	0.516889527	1.18796858	0.682124588	0.036379535	0.978054103	FALSE
1467	PF3D7_1021900.e1s3_6056	-0.001793613	-0.02786763	-0.026074017	0.94993265	0.589229327	0.849148604	-0.006969985	0.998284684	FALSE
1468	PF3D7_1022000.e2_4806	0.852465604	2.005937149	1.153471545	0.085408521	0.942094441	1.140170974	0.198988893	0.912416971	FALSE
1469	PF3D7_1022200.e2s1_5154	-0.650153319	-0.169762893	0.480390427	0.38093386	0.457646078	1.084226667	0.142252741	0.978054103	FALSE
1470	PF3D7_1022300.2o6_4974	-0.050971357	-0.053030848	-0.002059491	0.997544987	1.143057544	1.351462012	-0.000293864	0.999164392	FALSE
1471	PF3D7_1022700.1o1_7854	-0.584097927	-0.580732359	0.003365567	0.990055996	0.641172541	0.522733516	0.000891615	0.998284684	FALSE
1472	PF3D7_1023100.e1s3_6525	-0.764479995	-0.335110364	0.429369631	0.55716807	0.751415691	1.481905203	0.082859341	0.978054103	FALSE
1473	PF3D7_1023100.e1s4_6236	-0.622971637	0.157098492	0.780070129	0.157603272	0.591290022	1.000781025	0.200121851	0.916954512	FALSE
1474	PF3D7_1023100.e1s6_5941	0.252788998	0.672549329	0.419760331	0.486492227	1.171294919	1.16953826	0.059738761	0.978054103	FALSE
1475	PF3D7_1023200.1o1_6706	-0.069145244	-0.423918657	-0.354773414	0.270889983	1.186745074	0.509794408	-0.052247639	0.978054103	FALSE
1476	PF3D7_1023900.s3_8307	0.036616455	-0.12261258	-0.159229035	0.59987964	0.676501209	0.585177946	-0.039789038	0.978203774	FALSE
1477	PF3D7_1024000.iso1.exon1.amp1_1314	-0.286113051	-0.413590906	-0.127477855	0.65180789	0.769370076	0.525267	-0.028472623	0.978203774	FALSE
1478	PF3D7_1024300.1o1_7540	-0.430793927	-0.275359803	0.155434124	0.756569321	0.658827748	1.023468652	0.036555354	0.980666793	FALSE
1479	PF3D7_1024400.1o2_7617	-0.462089362	-0.924466578	-0.462377216	0.006186948	0.760373979	0.185022954	-0.107100856	0.454920202	FALSE
1480	PF3D7_1024800.e2s2_5767	0.374236815	0.688916458	0.314679643	0.608531083	1.210072402	1.204635617	0.043363314	0.978203774	FALSE
1481	PF3D7_1026500.iso1.exon1.amp1_1214	-0.494084403	-0.488487304	0.005597099	0.967510906	0.327181723	0.265854259	0.002906556	0.998284684	FALSE
1482	PF3D7_1026900.1o1_7582	-0.838565767	-1.014097562	-0.175531795	0.243994048	0.47133101	0.255535236	-0.064657588	0.960897908	FALSE
1483	PF3D7_1027000.iso1.exon1.amp2_seg1_3452	-0.617232042	-0.727029763	-0.109797721	0.805513833	0.735449998	0.899660856	-0.024223137	0.983296632	FALSE
1484	PF3D7_1027400.iso1.exon1.amp1_87	-0.2689772	-0.425953971	-0.156976771	0.398838163	0.314137566	0.360287908	-0.081862432	0.978054103	FALSE
1485	PF3D7_1028000.iso1.exon2.amp1_1224	-0.394749326	-0.612539018	-0.217789692	0.091430247	0.336937016	0.214344649	-0.111480169	0.912416971	FALSE
1486	PF3D7_1028300.e1s1_5740	-0.439495189	-0.62359673	-0.184101541	0.170349908	0.52193577	0.200396707	-0.061787468	0.925699889	FALSE
1487	PF3D7_1028700.1o1_8478	0.567574148	1.617736807	1.050162659	0.013063935	1.265222482	0.611096311	0.144634907	0.556200725	FALSE
1488	PF3D7_1028900.2o2_7542	-0.488873142	-0.479509159	0.009363983	0.959064682	0.521678863	0.337870308	0.003093038	0.998284684	FALSE
1489	PF3D7_1029400.1o1_7611	-0.663721524	-0.299818755	0.363902769	0.220449943	0.768492218	0.524957831	0.081369318	0.956958241	FALSE
1490	PF3D7_1029500.1o1_4650	-0.182767582	-0.397139596	-0.214372014	0.332993203	0.767862767	0.365840791	-0.048666919	0.978054103	FALSE
1491	PF3D7_1030200.1o1_4717	0.171306577	0.641755044	0.470448467	0.190132353	0.657190253	0.652136257	0.119409719	0.941095042	FALSE
1492	PF3D7_1030400.2o2_6704	-0.335863562	-0.76803683	-0.432173269	0.219121114	0.974826404	0.612834523	-0.076504106	0.956958241	FALSE
1493	PF3D7_1030500.1o1_4988	-0.582784653	-0.702960257	-0.120175603	0.60827377	0.77692413	0.406489709	-0.026887889	0.978203774	FALSE
1494	PF3D7_1030700.iso1.exon1.amp1_391	-0.353893303	-0.117321712	0.23657159	0.538313149	0.676387121	0.756957107	0.057492271	0.978054103	FALSE
1495	PF3D7_1030800.1o1_5237	0.043885682	0.184971375	0.141085693	0.745124954	1.116159787	0.822114179	0.021623886	0.980535118	FALSE
1496	PF3D7_1031500.iso1.exon1.amp1_1891	-0.609853997	-0.638180593	-0.028326596	0.934451562	0.497463006	0.703456037	-0.0090035	0.998284684	FALSE
1497	PF3D7_1031500.iso1.exon4.amp1_656	-0.467375275	-0.613287844	-0.14591257	0.123511732	0.301228959	0.153640339	-0.084269832	0.912416971	FALSE
1498	PF3D7_1031800.iso1.exon1.amp1_698	-0.255097592	-0.200423675	0.054673917	0.8951494	0.525193105	0.85248201	0.015961305	0.998284684	FALSE
1499	PF3D7_1032100.iso1.exon1.amp1_3724	-0.214482786	-0.335339699	-0.120856913	0.668205084	0.566746964	0.554023909	-0.035629098	0.978203774	FALSE
1500	PF3D7_1032100.iso1.exon1.amp2_4232	0.394857076	-0.113115179	-0.507972255	0.516969301	1.863097078	1.484068359	-0.046393349	0.978054103	FALSE
1501	PF3D7_1032400.3o7_4720	-0.347499467	0.434235206	0.781734673	0.144168442	0.433987505	0.963225503	0.250506343	0.916954512	FALSE
1502	PF3D7_1032900.e1s1_8259	-0.166133477	-0.302200368	-0.136066891	0.47634803	0.934590355	0.213467092	-0.025653387	0.978054103	FALSE
1503	PF3D7_1033700.e3s1_8911	-0.500758963	-0.554153002	-0.053394039	0.809087824	0.448746284	0.436774375	-0.019889075	0.98424393	FALSE
1504	PF3D7_1033800.8o8_9037	-0.090065629	-0.20924392	-0.119178291	0.74684355	0.997430445	0.691217069	-0.020515415	0.980535118	FALSE
1505	PF3D7_1034100.iso1.exon2.amp1_2074	-0.258283168	-0.358096432	-0.099813264	0.655739441	0.41103661	0.443841697	-0.040104033	0.978203774	FALSE
1506	PF3D7_1034500.iso1.exon2.amp2_seg1_573	-0.372713852	-0.607401988	-0.234688136	0.385282511	0.436962043	0.523635727	-0.087422293	0.978054103	FALSE
1507	PF3D7_1034700.1o1_4662	-0.488689154	-0.580792383	-0.092103229	0.615006312	0.46856115	0.344715015	-0.033629328	0.978203774	FALSE
1508	PF3D7_1034900.e1s1_8260	-0.488450615	-0.620186746	-0.131736131	0.576480578	0.643882862	0.43600462	-0.035173904	0.978203774	FALSE
1509	PF3D7_1035000.1o1_8245	-0.602745703	-0.051191658	0.551554045	0.092693827	0.48196234	0.562147648	0.187023936	0.912416971	FALSE
1510	PF3D7_1035100.1o1_8208	0.501242556	1.423138807	0.921896251	0.233412873	1.101286839	1.447289636	0.134202491	0.956958241	FALSE
1511	PF3D7_1035200.1o1_4741	-0.515170797	-0.04825178	0.466919017	0.371794138	0.969577178	0.999909669	0.079979757	0.978054103	FALSE
1512	PF3D7_1035300.iso1.exon1.amp1_2847	-0.238515377	0.585498337	0.824013714	0.32601002	0.996389894	1.625371508	0.126641468	0.978054103	FALSE
1513	PF3D7_1035300.iso1.exon1.amp2_3364	-0.636747113	0.136117143	0.772864256	0.312893428	0.642084372	1.488627443	0.164563058	0.978054103	FALSE
1514	PF3D7_1035600.1o1_6162	-0.125307911	-0.424502446	-0.299194535	0.273092436	0.930488187	0.450286408	-0.056027666	0.978054103	FALSE
1515	PF3D7_1035700.e1s1_8948	0.002686966	0.850181786	0.84749482	0.277194885	1.013071904	1.485929245	0.131281761	0.978054103	FALSE
1516	PF3D7_1035800.1o1_5041	0.958033773	0.638630689	-0.319403085	0.525016259	1.426018454	0.915318078	-0.038613077	0.978054103	FALSE
1517	PF3D7_1035900.1o1_5890	1.62639674	2.330120646	0.703723906	0.180069083	1.215991296	0.930015478	0.098758147	0.938661894	FALSE
1518	PF3D7_1036000.1o1_5293	0.452285591	1.065680496	0.613394905	0.31771981	1.093068122	1.16434296	0.092836048	0.978054103	FALSE
1519	PF3D7_1036300.1o1_6786	-0.630412606	-0.177517621	0.452894985	0.289395363	0.592431404	0.815623344	0.121510148	0.978054103	FALSE
1520	PF3D7_1036400.1o2_6117	0.742041352	1.400009851	0.657968499	0.438956297	1.45689313	1.655570299	0.074081247	0.978054103	FALSE
1521	PF3D7_1036400.e2s2_6540	-0.307559438	0.011866104	0.319425542	0.70377144	1.103969268	1.709423271	0.04486577	0.978203774	FALSE
1522	PF3D7_1036500.1o1_6762	0.343111893	1.007976821	0.664864928	0.256769641	0.981322719	1.097601102	0.111377301	0.975585467	FALSE
1523	PF3D7_1036600.iso1.exon3.amp1_3273	-0.83913824	-1.083671307	-0.244533067	0.381890994	0.838444527	0.493064271	-0.050477587	0.978054103	FALSE
1524	PF3D7_1036600.iso2.exon3.amp1_3851	-0.163385387	0.071039408	0.234424794	0.550356267	0.669869501	0.775810667	0.057250504	0.978054103	FALSE
1525	PF3D7_1036900.e1s2_5948	0.513432426	0.259965449	-0.253466978	0.439907062	1.217814381	0.528063638	-0.036368113	0.978054103	FALSE
1526	PF3D7_1036900.e2s1_6576	-0.582924985	-0.788974989	-0.206050004	0.124807157	0.458762403	0.212115143	-0.078357987	0.912416971	FALSE
1527	PF3D7_1037000.iso1.exon3.amp1_4275	0.374475602	0.736608146	0.362132545	0.418000854	0.995439576	0.844667892	0.061597632	0.978054103	FALSE
1528	PF3D7_1037000.iso1.exon3.amp2_4564	-0.300457787	0.136271164	0.43672895	0.444625713	0.762568731	1.129683616	0.089684598	0.978054103	FALSE
1529	PF3D7_1037100.1o1_9098	-0.239492275	-0.308726572	-0.069234297	0.720047286	0.680828616	0.326366597	-0.01772389	0.978203774	FALSE
1530	PF3D7_1037200.10o12_7895	-0.282333881	-0.459978455	-0.177644574	0.403792859	0.433614863	0.405531022	-0.068760955	0.978054103	FALSE
1531	PF3D7_1037600.e2s1_7184	0.028372044	0.21419497	0.185822925	0.741911713	0.915631735	1.136465307	0.032852027	0.980535118	FALSE
1532	PF3D7_1037600.e3s1_6616	-0.614540468	-0.526539399	0.088001069	0.738815025	0.694439056	0.497189541	0.021716648	0.980535118	FALSE
1533	PF3D7_1038400.e1s1_8544	-0.359939076	0.475732716	0.835671793	0.441997733	0.9081952	2.175386797	0.124129324	0.978054103	FALSE
1534	PF3D7_1038400.e3s1_7460	-0.4165084	0.123143715	0.539652115	0.548362035	0.623740195	1.832523411	0.106075006	0.978054103	FALSE
1535	PF3D7_1038400.e7s1_7389	-0.119444485	0.607047683	0.726492169	0.458253063	0.941827877	1.960632917	0.109820737	0.978054103	FALSE
1536	PF3D7_1038500.2o2_4992	-0.204197512	-0.001276424	0.202921088	0.556466458	0.707509477	0.670160424	0.048077077	0.978054103	FALSE
1537	PF3D7_1038600.2o2_8191	-0.456324166	-0.61702163	-0.160697464	0.434503595	0.378225914	0.397855205	-0.07039669	0.978054103	FALSE
1538	PF3D7_1038900.e1s1_9213	-0.783184367	-0.698663816	0.084520551	0.84793082	0.532563763	0.906374563	0.024039054	0.993519608	FALSE
1539	PF3D7_1039700.iso1.exon1.amp1_1851	0.402837576	0.559519138	0.156681562	0.789783349	1.237997079	1.155154886	0.02124666	0.982733913	FALSE
1540	PF3D7_1039900.iso1.exon2.amp1_3588	-0.36140271	-0.501960645	-0.140557935	0.538483854	0.780054114	0.388782287	-0.031370079	0.978054103	FALSE
1541	PF3D7_1040000.iso1.exon2.amp1_1585	0.132391272	0.260825692	0.12843442	0.85563399	0.982441562	1.442489584	0.020511021	0.993519608	FALSE
1542	PF3D7_1040100.iso1.exon2.amp1_3299	1.100378639	1.375148125	0.274769486	0.676924512	1.03041478	1.326461905	0.04290438	0.978203774	FALSE
1543	PF3D7_1040200.iso1.exon2.amp1_408	0.632966268	0.773438863	0.140472595	0.794943921	1.227308033	1.050655111	0.019365562	0.982733913	FALSE
1544	PF3D7_1040300.iso1.exon2.amp1_997	0.71571857	1.424961397	0.709242827	0.421101474	1.298172276	1.728184968	0.087384856	0.978054103	FALSE
1545	PF3D7_1040400.iso1.exon2.amp1_2156	0.119719909	0.4321056	0.312385692	0.671510866	0.976035401	1.494989173	0.049751641	0.978203774	FALSE
1546	PF3D7_1040500.iso1.exon2.amp1_2735	-0.158571119	0.303167758	0.461738877	0.43331539	0.836174821	1.159804899	0.08764534	0.978054103	FALSE
1547	PF3D7_1040600.iso1.exon2.amp1_2150	-0.142533489	0.57897314	0.721506629	0.42515202	0.827660012	1.802343542	0.122106212	0.978054103	FALSE
1548	PF3D7_1040700.iso1.exon2.amp1_419	-0.08155914	0.101819572	0.183378712	0.698149494	0.861758027	0.940675525	0.035094529	0.978203774	FALSE
1549	PF3D7_1040900.iso1.exon2.amp1_2143	0.10241222	1.233422662	1.131010442	0.038860574	0.906964397	0.863999524	0.208914445	0.778321776	FALSE
1550	PF3D7_1041000.iso1.exon2.amp1_1280	0.283275957	0.698640083	0.415364125	0.257283219	0.833626359	0.668279964	0.084743053	0.976213999	FALSE
1551	PF3D7_1041100.iso1.exon2.amp1_3013	-0.037707389	0.938476397	0.976183786	0.126540657	0.763196626	1.13150868	0.20026544	0.912416971	FALSE
1552	PF3D7_1041200.iso1.exon2.amp1_2153	0.471757273	0.76378502	0.292027747	0.742402354	1.058215625	1.819733621	0.041684248	0.980535118	FALSE
1553	PF3D7_1041300.iso1.exon1.amp1_1293	0.702875099	1.668100879	0.965225779	0.188626615	1.167865615	1.341990291	0.135359343	0.941095042	FALSE
1554	PF3D7_1041300.iso1.exon2.amp1_498	-0.268986959	0.187414101	0.456401061	0.425932822	0.668297584	1.135469694	0.103489753	0.978054103	FALSE
1555	PF3D7_1041300.iso1.exon2.amp2_787	-0.777805555	-0.57713243	0.200673125	0.686934169	0.533829436	1.019814251	0.055068402	0.978203774	FALSE
1556	PF3D7_1100100.iso1.exon1.amp1_4545	-0.584829746	-0.452232684	0.132597061	0.64315943	0.545129103	0.564751151	0.040375901	0.978203774	FALSE
1557	PF3D7_1100100.iso1.exon2.amp1_1582	0.798879919	1.401131616	0.602251698	0.377880682	1.195315443	1.313923986	0.083018663	0.978054103	FALSE
1558	PF3D7_1100200.e1s1_7391	-0.677064057	-0.283259919	0.393804138	0.230099334	0.401689508	0.615817592	0.15236434	0.956958241	FALSE
1559	PF3D7_1100200.e1s2_8548	-0.685428812	-0.138815067	0.546613745	0.391933851	0.570818098	1.264214102	0.133282314	0.978054103	FALSE
1560	PF3D7_1100200.e1s3_7392	-0.549203197	0.139271997	0.688475194	0.108472754	0.677890367	0.74540857	0.167336139	0.912416971	FALSE
1561	PF3D7_1100300.iso1.exon2.amp1_4474	0.920018514	1.289786973	0.369768459	0.624552482	1.302016882	1.502630579	0.046483438	0.978203774	FALSE
1562	PF3D7_1100400.iso1.exon2.amp1_3590	0.224794431	0.243501944	0.018707513	0.975589166	0.874777321	1.249845609	0.003374368	0.998284684	FALSE
1563	PF3D7_1100500.iso1.exon1.amp1_699	-0.119889756	0.144662897	0.264552653	0.678178195	0.75639981	1.300546571	0.052832199	0.978203774	FALSE
1564	PF3D7_1100800.2o2_4959	-0.554656966	-0.202211586	0.352445379	0.354194863	0.673971236	0.727699085	0.086364542	0.978054103	FALSE
1565	PF3D7_1101100.iso1.exon1.amp1_3897	0.32051921	0.530427124	0.209907914	0.75679139	0.827889225	1.387876607	0.038557345	0.980666793	FALSE
1566	PF3D7_1101200.iso1.exon1.amp1_3319	0.755044853	1.371168349	0.616123496	0.15628398	1.16393382	0.745907236	0.091262781	0.916954512	FALSE
1567	PF3D7_1101300.iso1.exon1.amp1_2434	0.304815784	0.50924612	0.204430336	0.675759077	0.848209034	0.975249488	0.039469199	0.978203774	FALSE
1568	PF3D7_1101500.iso1.exon1.amp1_3877	-0.481178061	-0.63355055	-0.152372489	0.548735751	0.80189321	0.447792682	-0.032954266	0.978054103	FALSE
1569	PF3D7_1101700.iso1.exon2.amp1_2140	0.542887595	0.987418267	0.444530672	0.429382463	1.100482016	1.081167721	0.067454144	0.978054103	FALSE
1570	PF3D7_1102200.iso1.exon1.amp1_2170	-0.184615781	-0.692716879	-0.508101098	0.073890998	1.005581034	0.430231588	-0.088317233	0.889229006	FALSE
1571	PF3D7_1102400.1o1_6766	-0.357046319	-0.424719629	-0.06767331	0.790402923	0.490650434	0.505969752	-0.022907051	0.982733913	FALSE
1572	PF3D7_1102500.e2s1_5459	1.021202812	1.319352825	0.298150013	0.687114757	0.950009804	1.506196245	0.048394916	0.978203774	FALSE
1573	PF3D7_1102700.iso1.exon1.amp1_375	-0.444258723	0.156181102	0.600439825	0.464359155	1.027022569	1.631909382	0.090105638	0.978054103	FALSE
1574	PF3D7_1102800.iso1.exon1.amp1_671	1.432849269	2.111590212	0.678740944	0.372524243	1.493728352	1.448354003	0.075985294	0.978054103	FALSE
1575	PF3D7_1103000.iso1.exon1.amp1_1212	-0.515873536	-0.554930671	-0.039057136	0.662867779	0.334947593	0.145555334	-0.020374279	0.978203774	FALSE
1576	PF3D7_1103100.e2s1_8572	-0.176138357	-0.423321478	-0.24718312	0.321134334	0.877674662	0.407583054	-0.049128566	0.978054103	FALSE
1577	PF3D7_1103500.13o13_6965	-0.318536095	-0.231248478	0.087287617	0.833917577	0.48668053	0.856735331	0.026917765	0.989130662	FALSE
1578	PF3D7_1103500.1o13_8994	-0.205636754	-0.036757909	0.168878845	0.74649602	0.68667607	1.065746205	0.038114714	0.980535118	FALSE
1579	PF3D7_1103500.1o2_7831	0.459520237	0.759207268	0.29968703	0.608307796	0.799348317	1.178801578	0.058767879	0.978203774	FALSE
1580	PF3D7_1103800.e1s1_7393	1.451233388	1.482484834	0.031251446	0.968025765	1.302367006	1.576910449	0.003899621	0.998284684	FALSE
1581	PF3D7_1104000.1o3_6466	-0.555634743	-0.811507393	-0.25587265	0.084586753	0.485226139	0.233259808	-0.091901133	0.912416971	FALSE
1582	PF3D7_1104100.4o4_7289	-0.056170356	-0.120848094	-0.064677738	0.796206486	0.743830921	0.456906799	-0.015020975	0.982733913	FALSE
1583	PF3D7_1104200.e1s2_5379	-0.444954476	-0.075612326	0.36934215	0.402783465	0.404859129	0.875634956	0.128107221	0.978054103	FALSE
1584	PF3D7_1104800.2o9_8185	-0.733311642	-1.17034628	-0.437034638	0.001199815	0.664650678	0.101015171	-0.116070364	0.241372595	FALSE
1585	PF3D7_1105200.iso1.exon3.amp1_951	-0.424357785	-0.663510558	-0.239152773	0.183948436	0.352692185	0.32451488	-0.113988602	0.939531746	FALSE
1586	PF3D7_1105600.e1s1_6922	-0.58368529	-0.021359276	0.562326015	0.183008479	0.595260455	0.772981742	0.151765514	0.939531746	FALSE
1587	PF3D7_1105900.iso1.exon1.amp1_1541	-0.699561087	-0.879104783	-0.179543696	0.082264179	0.407505071	0.147357813	-0.077257657	0.912416971	FALSE
1588	PF3D7_1106100.iso1.exon4.amp1_381	-0.496775128	-0.587054311	-0.090279182	0.486274253	0.369242241	0.235082781	-0.042166603	0.978054103	FALSE
1589	PF3D7_1106300.2o6_8231	0.192023539	0.280849101	0.088825562	0.843733825	0.961379814	0.885699225	0.015530015	0.993519608	FALSE
1590	PF3D7_1106700.iso1.exon1.amp2_772	-0.559908877	-0.976299998	-0.416391121	0.001267612	0.506450348	0.153887099	-0.144509989	0.241372595	FALSE
1591	PF3D7_1107400.iso1.exon1.amp1_3598	0.414572661	0.490692062	0.076119401	0.929041676	0.822998741	1.773833177	0.013004665	0.998284684	FALSE
1592	PF3D7_1107500.iso1.exon5.amp1_2058	-0.239843153	-0.349775713	-0.10993256	0.704063264	0.695835133	0.554722497	-0.026880998	0.978203774	FALSE
1593	PF3D7_1107600.iso1.exon1.amp1_seg2_2908	-0.463423146	-0.53352864	-0.070105494	0.637009713	0.65597181	0.204549718	-0.018778828	0.978203774	FALSE
1594	PF3D7_1107600.iso1.exon1.amp2_3661	-0.541014515	-0.164278358	0.376736156	0.17500399	0.503032307	0.501273007	0.124870172	0.928562811	FALSE
1595	PF3D7_1107800.e2s1_7678	-0.281094277	-0.373561591	-0.092467314	0.797829845	0.746568425	0.711457978	-0.020748886	0.982733913	FALSE
1596	PF3D7_1107900.iso1.exon1.amp1_542	-0.438057892	-0.284488138	0.153569754	0.662796951	0.59965507	0.703189052	0.041820163	0.978203774	FALSE
1597	PF3D7_1108100.iso1.exon1.amp1_2831	-0.684539703	-0.846505184	-0.161965481	0.248080827	0.517063556	0.220764076	-0.054753393	0.967480721	FALSE
1598	PF3D7_1108600.e1s1_6906	-0.224345865	-0.240829733	-0.016483868	0.954966054	0.590907383	0.578922955	-0.004659715	0.998284684	FALSE
1599	PF3D7_1109200.3o4_6218	0.004398029	0.445117605	0.440719576	0.515903443	1.00348158	1.348267673	0.070128406	0.978054103	FALSE
1600	PF3D7_1110200.e1s1_4895	0.075089791	1.001279708	0.926189917	0.249501938	0.564427971	1.533094395	0.209226117	0.968457025	FALSE
1601	PF3D7_1110200.e1s2_6629	-0.223636042	-0.51674814	-0.293112098	0.23903567	0.615948375	0.4458924	-0.081496035	0.956958241	FALSE
1602	PF3D7_1110200.e2s1_6580	-0.445081034	-0.379543618	0.065537416	0.857011143	0.513790278	0.742663199	0.020078985	0.993519608	FALSE
1603	PF3D7_1110400.e3s2_7791	-0.657397319	-0.787811285	-0.130413965	0.676491802	0.579614932	0.619872835	-0.037204261	0.978203774	FALSE
1604	PF3D7_1110700.e2s1_5162	-0.430945728	-0.675675843	-0.244730115	0.133945737	0.669013143	0.230696684	-0.06419097	0.912416971	FALSE
1605	PF3D7_1111000.1o1_6758	-0.280124307	-0.326699	-0.046574693	0.811274337	0.486846738	0.372781949	-0.016323923	0.984749192	FALSE
1606	PF3D7_1111300.1o1_8154	0.044638279	0.488859436	0.444221157	0.527878876	0.834509848	1.414642838	0.080714307	0.978054103	FALSE
1607	PF3D7_1111400.iso1.exon1.amp1_2422	-0.263754324	-0.582241919	-0.318487595	0.197312918	0.654095413	0.431592885	-0.083824148	0.956958241	FALSE
1608	PF3D7_1111600.iso1.exon1.amp1_437	-0.179186443	-0.021600952	0.157585492	0.583996218	0.592037453	0.560191919	0.044622759	0.978203774	FALSE
1609	PF3D7_1111800.iso1.exon1.amp1_2132	-1.35287496	-0.911570086	0.441304875	0.236693417	1.097477524	0.643348718	0.069604186	0.956958241	FALSE
1610	PF3D7_1111800.iso1.exon2.amp1_2710	0.197732175	0.454037936	0.25630576	0.535071606	0.835960787	0.802079241	0.051326997	0.978054103	FALSE
1611	PF3D7_1111900.iso1.exon1.amp1_693	0.136049635	0.513426145	0.37737651	0.568566122	0.910611175	1.328558778	0.0651084	0.978054103	FALSE
1612	PF3D7_1112100.iso1.exon1.amp1_1397	-0.422762955	-0.455805732	-0.033042776	0.892743559	0.727499419	0.44817388	-0.007845208	0.998284684	FALSE
1613	PF3D7_1112100.iso1.exon1.amp2_1686	-0.41290943	-0.571886311	-0.158976881	0.401563004	0.535024469	0.340969691	-0.051242678	0.978054103	FALSE
1614	PF3D7_1112100.iso1.exon1.amp3_2210	-0.559735649	-0.576732937	-0.016997288	0.951031801	0.302043723	0.572473558	-0.008264093	0.998284684	FALSE
1615	PF3D7_1112400.1o1_4663	-0.243178128	-0.599784444	-0.356606316	0.039351693	0.614764469	0.253059778	-0.101473818	0.778685174	FALSE
1616	PF3D7_1113000.iso1.exon2.amp1_1889	-0.450928267	-0.836724829	-0.385796562	0.019297658	0.702324972	0.205191279	-0.096591883	0.623576266	FALSE
1617	PF3D7_1113000.iso1.exon3.amp1_1542	-0.411792951	-0.323110593	0.088682358	0.815057049	0.529543619	0.773508633	0.026304022	0.985718836	FALSE
1618	PF3D7_1113000.iso1.exon5.amp1_118	-0.518302381	-1.020920263	-0.502617882	0.025654202	0.766736626	0.327532322	-0.114582752	0.674546004	FALSE
1619	PF3D7_1113000.iso1.exon7.amp3_1351	0.05513514	0.29802616	0.242891019	0.614659683	0.577306716	0.978720343	0.063793717	0.978203774	FALSE
1620	PF3D7_1113700.e1s1_8346	0.433923711	0.648682095	0.214758384	0.590545442	1.056473097	0.744264173	0.034869601	0.978203774	FALSE
1621	PF3D7_1114500.iso1.exon1.amp1_3323	-0.673577774	-0.336956468	0.336621307	0.471095721	0.433983199	0.9375624	0.108967935	0.978054103	FALSE
1622	PF3D7_1114700.e1_8271	-0.186971617	-0.211501795	-0.024530177	0.947704746	0.796471013	0.736701385	-0.005174794	0.998284684	FALSE
1623	PF3D7_1114900.e1s1_7681	-0.39322894	-0.503090614	-0.109861674	0.730000343	0.664139231	0.624786939	-0.02774778	0.979885706	FALSE
1624	PF3D7_1114900.e1s2_9122	-0.697715196	-0.666714432	0.031000764	0.869970788	0.587208259	0.340889518	0.009142081	0.995523014	FALSE
1625	PF3D7_1115200.2o7_7060	-0.554192962	-0.616630092	-0.06243713	0.763961006	0.443228823	0.407571995	-0.023682191	0.982640702	FALSE
1626	PF3D7_1115300.e1s1_7187	-0.085124397	-0.320180562	-0.235056165	0.46594515	0.689031871	0.61653117	-0.057497039	0.978054103	FALSE
1627	PF3D7_1115400.e1s1_6025	0.23079887	0.668734499	0.437935629	0.421115207	0.800184157	1.067233907	0.087507735	0.978054103	FALSE
1628	PF3D7_1115600.e3s1_6879	-0.11523753	-0.291552129	-0.176314599	0.525282793	0.653029397	0.526862716	-0.04589806	0.978054103	FALSE
1629	PF3D7_1115700.e1s1_7476	-0.535264847	-0.65461161	-0.119346763	0.708079769	0.65109121	0.626560692	-0.030676707	0.978203774	FALSE
1630	PF3D7_1116000.iso1.exon2.amp1_3093	0.226866601	0.91106953	0.684202929	0.471353131	1.195415043	1.890639426	0.088310632	0.978054103	FALSE
1631	PF3D7_1116000.iso1.exon2.amp2_3382	-0.072870813	0.684251858	0.757122671	0.414731116	1.157969265	1.83087678	0.100889614	0.978054103	FALSE
1632	PF3D7_1116800.e4s1_7224	-0.446604021	-0.460397903	-0.013793882	0.970037868	0.813337565	0.719307922	-0.002861445	0.998284684	FALSE
1633	PF3D7_1117000.iso1.exon6.amp1_3500	-0.374612545	-0.609563236	-0.234950691	0.171125055	0.49873576	0.291268161	-0.081557764	0.926254722	FALSE
1634	PF3D7_1117200.iso1.exon2.amp1_1104	-0.382632701	-0.689714864	-0.307082164	0.018692393	0.528819911	0.170351641	-0.101993668	0.623576266	FALSE
1635	PF3D7_1117800.iso1.exon1.amp1_264	-0.461830421	0.06815132	0.529981741	0.169093531	0.307221675	0.70548392	0.236751084	0.925699889	FALSE
1636	PF3D7_1117900.iso1.exon1.amp1_2246	-0.404756228	-0.114437997	0.290318231	0.613737296	0.705287528	1.165600258	0.06282786	0.978203774	FALSE
1637	PF3D7_1118100.iso1.exon1.amp1_3510	-0.590503506	-0.857377916	-0.266874409	0.055963825	0.382576206	0.222873652	-0.120779212	0.839158099	FALSE
1638	PF3D7_1118100.iso1.exon2.amp1_2116	-0.233210417	-0.337598589	-0.104388173	0.239223672	0.370506632	0.126122816	-0.04944901	0.956958241	FALSE
1639	PF3D7_1118200.e1s1_7968	0.021428794	0.947158935	0.925730141	0.04075099	0.776930907	0.717639346	0.200226716	0.788039829	FALSE
1640	PF3D7_1118300.e1s1_7205	-0.287477677	-0.517837914	-0.230360237	0.11212536	0.597420926	0.202119899	-0.067681076	0.912416971	FALSE
1641	PF3D7_1118800.2o7_5861	-0.560323406	-0.87445406	-0.314130654	0.100767836	0.476767902	0.322134102	-0.113286324	0.912416971	FALSE
1642	PF3D7_1119400.iso1.exon1.amp3_2783	-0.201462098	0.05030445	0.251766548	0.407348864	0.730531676	0.566291393	0.058756652	0.978054103	FALSE
1643	PF3D7_1119500.iso1.exon1.amp1_3300	-0.505623466	-0.752262059	-0.246638593	0.372472524	0.629090795	0.516972898	-0.066554126	0.978054103	FALSE
1644	PF3D7_1119500.iso1.exon3.amp1_3827	-0.063284831	-0.357395296	-0.294110465	0.139492169	0.513980382	0.341062412	-0.098481424	0.916954512	FALSE
1645	PF3D7_1119700.iso1.exon1.amp1_1569	-0.253058615	-0.386752274	-0.133693659	0.785800853	0.812202362	0.991591712	-0.02671601	0.982733913	FALSE
1646	PF3D7_1119900.iso1.exon1.amp1_3728	0.144515733	-0.362212082	-0.506727815	0.008138326	0.511511256	0.271420875	-0.172120813	0.488837897	FALSE
1647	PF3D7_1120300.2o2_8189	0.202389901	0.012830359	-0.189559542	0.346350884	0.580069716	0.357168891	-0.056446371	0.978054103	FALSE
1648	PF3D7_1120400.iso1.exon2.amp1_1793	-0.447210073	-0.183317283	0.26389279	0.574358412	0.686733026	0.940705926	0.061137777	0.978203774	FALSE
1649	PF3D7_1120700.iso1.exon1.amp2_3653	-0.347086705	-0.24167317	0.105413536	0.772810175	0.799363141	0.713227227	0.022231931	0.982640702	FALSE
1650	PF3D7_1120800.iso1.exon1.amp1_4126	-0.576024617	-0.742238027	-0.166213411	0.458879387	0.532206258	0.422170999	-0.053158142	0.978054103	FALSE
1651	PF3D7_1121200.iso1.exon1.amp1_653	-0.027751493	-0.174998342	-0.147246849	0.63892941	0.773439238	0.596310656	-0.032469945	0.978203774	FALSE
1652	PF3D7_1121600.iso1.exon2.amp1_2679	-0.214042967	0.999594268	1.213637235	0.094432357	0.814257292	1.246852828	0.231705342	0.912416971	FALSE
1653	PF3D7_1121700.e1s1_5657	-0.430920119	-0.382842635	0.048077485	0.911957677	0.527480619	0.895415097	0.013815245	0.998284684	FALSE
1654	PF3D7_1121800.s1_7974	1.720247487	2.241623094	0.521375607	0.260572644	0.906708309	0.859099249	0.096385835	0.976799056	FALSE
1655	PF3D7_1122000.iso1.exon1.amp1_4471	-0.473643331	-0.594754395	-0.121111064	0.666654382	0.791348261	0.51863131	-0.02635632	0.978203774	FALSE
1656	PF3D7_1122500.iso1.exon1.amp1_3721	-0.458206599	-0.712111217	-0.253904618	0.023525278	0.501096192	0.132128446	-0.089185751	0.666326899	FALSE
1657	PF3D7_1122500.iso1.exon1.amp2_4229	-0.547519954	-0.358873393	0.188646561	0.493003237	0.572055454	0.529881065	0.055400445	0.978054103	FALSE
1658	PF3D7_1122600.2o2_5848	-0.214954478	0.019178313	0.23413279	0.753804568	0.885443067	1.530162029	0.039888081	0.980535118	FALSE
1659	PF3D7_1122800.e1s1_6545	0.395500211	0.850157296	0.454657085	0.442822219	1.03519855	1.152685639	0.072243287	0.978054103	FALSE
1660	PF3D7_1122900.e1s1_9126	-1.068561222	-0.768191716	0.300369505	0.621643681	0.591784942	1.243145683	0.072032204	0.978203774	FALSE
1661	PF3D7_1122900.e2s2_7971	-0.129793559	-0.32309315	-0.193299591	0.566546423	0.941611932	0.619291794	-0.035346731	0.978054103	FALSE
1662	PF3D7_1122900.e2s3_6815	-0.397169055	-0.207495588	0.189673467	0.631681038	0.811939323	0.77345457	0.03913599	0.978203774	FALSE
1663	PF3D7_1122900.e2s5_7132	0.436732325	1.236436092	0.799703767	0.276702711	1.193938176	1.387262754	0.109524192	0.978054103	FALSE
1664	PF3D7_1123000.iso1.exon1.amp3_1921	-0.244293435	-0.194839507	0.049453929	0.906658067	0.565198146	0.864569075	0.013605416	0.998284684	FALSE
1665	PF3D7_1123200.iso1.exon1.amp1_3335	0.597036979	1.195333177	0.598296198	0.432124608	1.307420061	1.481396148	0.075094338	0.978054103	FALSE
1666	PF3D7_1123400.e1_5091	0.396830692	-0.371067459	-0.767898151	0.158538348	1.45546452	0.935979931	-0.090945731	0.916954512	FALSE
1667	PF3D7_1123500.iso1.exon1.amp1_4580	0.328949506	0.236128595	-0.092820911	0.753290726	1.02964983	0.502502799	-0.015704017	0.980535118	FALSE
1668	PF3D7_1124000.1o5_7896	-0.112829685	-0.165055847	-0.052226162	0.870905119	0.800996997	0.615363866	-0.011123091	0.995523014	FALSE
1669	PF3D7_1124000.2o5_7607	-0.369250622	-0.532594135	-0.163343513	0.423799183	0.474236587	0.383695496	-0.058540047	0.978054103	FALSE
1670	PF3D7_1124100.iso1.exon1.amp1_1988	0.20623143	0.162564326	-0.043667104	0.907830113	0.761181284	0.747900656	-0.009579685	0.998284684	FALSE
1671	PF3D7_1124300.1o3_7324	-0.13528261	-0.10463592	0.03064669	0.964955813	1.051138958	1.421402986	0.004649947	0.998284684	FALSE
1672	PF3D7_1124400.iso1.exon1.amp1_1806	-0.25728354	-0.393880698	-0.136597157	0.491206922	0.356110721	0.387856752	-0.063278725	0.978054103	FALSE
1673	PF3D7_1124500.1o1_7615	0.070522752	0.688794534	0.618271781	0.316768568	0.815843984	1.189481514	0.119077545	0.978054103	FALSE
1674	PF3D7_1124600.e1s1_5168	-0.034025868	-0.423224193	-0.389198325	0.229295707	1.162252485	0.515648961	-0.058481342	0.956958241	FALSE
1675	PF3D7_1124700.e1s1_6312	-0.526672019	-0.435011807	0.091660212	0.575322128	0.500222947	0.292297918	0.031722436	0.978203774	FALSE
1676	PF3D7_1125300.iso1.exon1.amp1_2856	0.143558436	-0.095877053	-0.23943549	0.667106839	0.831190645	1.122190788	-0.045955857	0.978203774	FALSE
1677	PF3D7_1125300.iso1.exon1.amp2_3352	0.452240255	0.181293521	-0.270946733	0.704018607	1.098402397	1.438551497	-0.039569943	0.978203774	FALSE
1678	PF3D7_1125400.2o2_5277	-0.673852195	-0.558430577	0.115421618	0.755226516	0.598980519	0.7463569	0.031173316	0.980535118	FALSE
1679	PF3D7_1125700.6o6_7634	-0.422234166	-0.19188379	0.230350376	0.627065395	0.816908749	0.943116391	0.046150678	0.978203774	FALSE
1680	PF3D7_1125800.1o4_6747	0.55721784	0.932157755	0.374939915	0.499353687	0.889486388	1.095451373	0.06832011	0.978054103	FALSE
1681	PF3D7_1125800.3o4_6458	-0.940837669	-0.591617267	0.349220402	0.239570677	0.546944829	0.549422095	0.106361852	0.956958241	FALSE
1682	PF3D7_1126000.e1s2_8344	-0.31188316	-0.296548946	0.015334214	0.951258896	0.477748289	0.501099797	0.005319958	0.998284684	FALSE
1683	PF3D7_1126100.iso1.exon2.amp2_220	-0.27763615	-0.253514078	0.024122072	0.930477559	0.6557686	0.535118912	0.006247806	0.998284684	FALSE
1684	PF3D7_1126300.e2_7985	-0.555963525	-0.45422452	0.101739006	0.552243142	0.473198131	0.314749468	0.036998213	0.978054103	FALSE
1685	PF3D7_1126400.2o3_5535	-0.217132275	0.901768678	1.118900952	0.153879843	0.709400439	1.421085258	0.227534066	0.916954512	FALSE
1686	PF3D7_1126500.iso1.exon1.amp1_2267	-0.389423797	-0.190378898	0.199044898	0.676160512	0.458856337	0.978008535	0.061241467	0.978203774	FALSE
1687	PF3D7_1127000.e6s1_6000	-0.078267876	-0.517100044	-0.438832167	0.113791552	0.523057896	0.481674066	-0.141024836	0.912416971	FALSE
1688	PF3D7_1127300.1o1_7293	-0.36672383	-0.803817082	-0.437093251	0.034550283	0.617881194	0.315883778	-0.123058967	0.733931777	FALSE
1689	PF3D7_1127400.iso1.exon1.amp1_2346	-0.997068267	-1.246151334	-0.249083066	0.147494261	0.573225583	0.27702676	-0.075717262	0.916954512	FALSE
1690	PF3D7_1127400.iso1.exon2.amp1_2078	-0.385850329	-0.609561962	-0.223711633	0.203000255	0.334078403	0.320084139	-0.112118431	0.956958241	FALSE
1691	PF3D7_1127600.iso1.exon2.amp1_349	-0.501305303	0.171842757	0.67314806	0.390144611	0.401585178	1.559115773	0.174481885	0.978054103	FALSE
1692	PF3D7_1127700.1o3_4715	0.3909954	0.447932007	0.056936607	0.918475089	0.805885886	1.13568966	0.011178742	0.998284684	FALSE
1693	PF3D7_1127900.3o3_6444	0.218587699	0.411543909	0.192956211	0.735115428	0.960192561	1.144988129	0.032734066	0.980535118	FALSE
1694	PF3D7_1128100.2o3_7845	-0.438450026	0.398697956	0.837147982	0.071869452	0.728985586	0.777380531	0.189953454	0.878683929	FALSE
1695	PF3D7_1128300.e1s1_8069	-0.872495143	-0.16787857	0.704616573	0.209161615	0.433134186	1.050056235	0.218347093	0.956958241	FALSE
1696	PF3D7_1128300.e3s1_8903	-0.346363218	-0.408528488	-0.062165271	0.786268207	0.311477614	0.4678519	-0.031160136	0.982733913	FALSE
1697	PF3D7_1128500.1o1_8799	-0.101574709	-0.278711998	-0.177137289	0.80429035	1.133886072	1.446297374	-0.0251748	0.983296632	FALSE
1698	PF3D7_1129000.e1s1_6583	-0.365735605	-0.581414811	-0.215679206	0.185129575	0.405252747	0.286100601	-0.091281655	0.939531746	FALSE
1699	PF3D7_1129100.e1s1_6319	-0.306900808	0.006465826	0.313366635	0.568381264	1.0785344	1.073581849	0.048449432	0.978054103	FALSE
1700	PF3D7_1129200.2o4_7594	-0.460281486	-0.671786376	-0.211504891	0.301432886	0.825606484	0.304067853	-0.044907761	0.978054103	FALSE
1701	PF3D7_1129500.iso1.exon1.amp1_4492	0.354014683	0.104844413	-0.24917027	0.531301704	1.017705294	0.744133581	-0.041903636	0.978054103	FALSE
1702	PF3D7_1129600.e1s1_8953	-0.440921154	-0.755055656	-0.314134501	0.17258642	0.550576949	0.405147768	-0.097611455	0.926254722	FALSE
1703	PF3D7_1129700.iso1.exon1.amp1_1271	-0.349200569	-0.173933253	0.175267316	0.45985925	0.324160423	0.46953942	0.085072918	0.978054103	FALSE
1704	PF3D7_1129800.1o1_9026	0.208495293	-0.173847172	-0.382342465	0.130986849	0.732037116	0.42282605	-0.090463313	0.912416971	FALSE
1705	PF3D7_1130200_5980	0.796836339	0.970520852	0.173684513	0.783744625	0.740307236	1.299779635	0.035236966	0.982640702	FALSE
1706	PF3D7_1130400_8004	0.159422197	0.426382653	0.266960456	0.580341384	0.635130646	0.972449857	0.065343723	0.978203774	FALSE
1707	PF3D7_1131200.iso1.exon1.amp1_62	-0.504316531	-0.746000531	-0.241684	0.251736803	0.335578069	0.395193164	-0.117534193	0.968457025	FALSE
1708	PF3D7_1131200.iso1.exon6.amp1_345	-0.650549443	-0.746121132	-0.095571689	0.307817139	0.361272298	0.144608858	-0.04630348	0.978054103	FALSE
1709	PF3D7_1131600.s2_8288	0.118085348	-0.005187236	-0.123272584	0.776206878	0.838397721	0.860936981	-0.024431741	0.982640702	FALSE
1710	PF3D7_1131800.iso1.exon1.amp1_838	-0.588473813	-0.854013882	-0.265540069	0.116235634	0.436525298	0.286021287	-0.104759752	0.912416971	FALSE
1711	PF3D7_1132300.1o1_5547	0.008505547	0.553553465	0.545047917	0.201033307	0.973477073	0.762690278	0.095385185	0.956958241	FALSE
1712	PF3D7_1132900.1o1_6392	-0.416383627	0.19848217	0.614865796	0.095926963	0.83990873	0.624938708	0.125153588	0.912416971	FALSE
1713	PF3D7_1133200.e1s2_5075	0.039768998	0.145325097	0.105556098	0.871979552	1.008786069	1.330911484	0.016763369	0.995846326	FALSE
1714	PF3D7_1133400_6235	0.998882665	1.751702767	0.752820102	0.186831287	1.01877651	1.035746127	0.122928356	0.939531746	FALSE
1715	PF3D7_1133500.iso1.exon1.amp1_1264	-0.584212097	-0.819562779	-0.235350682	0.170307364	0.546077337	0.283538978	-0.074935758	0.925699889	FALSE
1716	PF3D7_1133500.iso1.exon2.amp1_4149	-0.497349073	0.184957747	0.682306821	0.289724799	0.459146542	1.246028489	0.189555669	0.978054103	FALSE
1717	PF3D7_1133700.iso1.exon1.amp1_970	0.10044646	0.206274136	0.105827677	0.780080626	0.823817615	0.741369159	0.021639829	0.982640702	FALSE
1718	PF3D7_1133800.iso1.exon1.amp1_1320	-0.335067264	-0.604861253	-0.269793989	0.346189465	0.535184851	0.54459979	-0.083853757	0.978054103	FALSE
1719	PF3D7_1133900.iso1.exon2.amp2_3355	-0.668611928	-0.711562867	-0.042950939	0.890798503	0.756884702	0.602844269	-0.009656001	0.997630034	FALSE
1720	PF3D7_1134000.e1s1_6336	1.077372467	1.663016696	0.585644229	0.219126594	0.825732259	0.878777	0.117345722	0.956958241	FALSE
1721	PF3D7_1134200.s1_7422	-0.795813354	-0.085191769	0.710621586	0.130725697	0.720838921	0.832162323	0.161348897	0.912416971	FALSE
1722	PF3D7_1134300.iso1.exon1.amp1_4294	-0.605631512	-0.639213565	-0.033582053	0.937296015	0.611158164	0.872363355	-0.008671852	0.998284684	FALSE
1723	PF3D7_1134300.iso1.exon1.amp2_4583	-0.161967678	0.088933771	0.250901449	0.715989999	0.650160211	1.42006172	0.053994188	0.978203774	FALSE
1724	PF3D7_1134300.iso1.exon1.amp3_4228	-0.55682115	-0.082054744	0.474766407	0.587008605	0.800567407	1.781572229	0.082390634	0.978203774	FALSE
1725	PF3D7_1134500.s1_5988	-0.428574011	-0.601171801	-0.17259779	0.278159499	0.726443706	0.202306891	-0.041798748	0.978054103	FALSE
1726	PF3D7_1134500.s2_6572	-1.015694862	-1.055193187	-0.039498325	0.92250937	0.74456068	0.814040628	-0.008747111	0.998284684	FALSE
1727	PF3D7_1134700.e1_5101	-0.326666962	-0.892501011	-0.56583405	0.062817212	0.970101712	0.473797299	-0.101605411	0.862760147	FALSE
1728	PF3D7_1134700.e2s1_6257	-0.28566559	-0.027217281	0.258448309	0.478471022	0.755146761	0.701221622	0.057483026	0.978054103	FALSE
1729	PF3D7_1134700.e2s2_6835	0.695557423	0.818175739	0.122618316	0.691716733	0.763483463	0.589271345	0.027389554	0.978203774	FALSE
1730	PF3D7_1135100.1o1_6774	-0.356946746	-0.035459824	0.321486922	0.646704309	0.545542375	1.442060001	0.076110234	0.978203774	FALSE
1731	PF3D7_1135400.e1s1_5738	-0.260740251	-0.706171283	-0.445431032	0.006260197	0.769929704	0.161090334	-0.101992776	0.454920202	FALSE
1732	PF3D7_1136100.1o1_5019	-0.542695691	0.140031726	0.682727417	0.22529016	0.739545899	1.05263176	0.145777352	0.956958241	FALSE
1733	PF3D7_1136200.1o5_8797	0.090780356	-0.218548389	-0.309328745	0.388091238	0.824789119	0.670616162	-0.063717837	0.978054103	FALSE
1734	PF3D7_1136200.5o5_9080	-0.061228302	0.487368975	0.548597277	0.375857566	0.929119827	1.202968001	0.09490654	0.978054103	FALSE
1735	PF3D7_1136300.e2s1_5389	0.451279642	0.349203482	-0.10207616	0.817702063	0.946449047	0.869514696	-0.018133094	0.986166273	FALSE
1736	PF3D7_1136500.1.e4s1_8282	-0.222688213	-0.50675356	-0.284065347	0.300814709	0.652540385	0.502682432	-0.074250176	0.978054103	FALSE
1737	PF3D7_1136600.iso1.exon1.amp1_4586	-0.632395938	-0.720665881	-0.088269943	0.668793587	0.51684144	0.391518868	-0.029163379	0.978203774	FALSE
1738	PF3D7_1136700.iso1.exon7.amp1_117	-0.359967151	-0.654289918	-0.294322766	0.144685616	0.520510634	0.346725203	-0.097296513	0.916954512	FALSE
1739	PF3D7_1136900.e1s1_7134	0.410838556	0.397193569	-0.013644987	0.981215059	0.872395965	1.181076442	-0.002493961	0.998284684	FALSE
1740	PF3D7_1136900.e2s1_4885	-0.458671895	-0.460162412	-0.001490518	0.995974551	0.282573855	0.613498401	-0.000739672	0.999164392	FALSE
1741	PF3D7_1137100_7714	-0.873140064	-0.290535012	0.582605053	0.271505663	0.579808884	1.012143875	0.151158082	0.978054103	FALSE
1742	PF3D7_1137300.1o1_6196	-0.19179029	-0.579768258	-0.387977968	0.061562308	0.902112697	0.265540395	-0.075619205	0.862760147	FALSE
1743	PF3D7_1137600 (renamed)_7629	0.467637024	0.10570875	-0.361928274	0.439427021	0.935399458	0.899070872	-0.064761914	0.978054103	FALSE
1744	PF3D7_1137600.1o2_7251	-0.622811742	-0.451441124	0.171370618	0.60847348	0.3865802	0.67909055	0.066570539	0.978203774	FALSE
1745	PF3D7_1137900.1o2_5315	-0.516542535	0.031304847	0.547847382	0.28825818	0.713874389	0.98402677	0.121951909	0.978054103	FALSE
1746	PF3D7_1137900.2o2_4737	-0.020865975	0.139547494	0.160413469	0.473315384	0.785406394	0.373130048	0.035606556	0.978054103	FALSE
1747	PF3D7_1138000.iso1.exon1.amp3_4227	-0.220947222	-0.152309762	0.06863746	0.874429229	0.708133003	0.878892767	0.015690341	0.995846326	FALSE
1748	PF3D7_1138100.1o1_8413	-0.415159387	-0.664922641	-0.249763254	0.229148399	0.550683032	0.366381205	-0.078047212	0.956958241	FALSE
1749	PF3D7_1138400.e1s2_7418	-0.363014495	-0.54802404	-0.185009545	0.404715362	0.638533301	0.397622608	-0.050021569	0.978054103	FALSE
1750	PF3D7_1138400.e1s3_5106	-0.105066034	0.221937266	0.3270033	0.543850101	0.731315451	1.079087671	0.070081378	0.978054103	FALSE
1751	PF3D7_1138400.e1s4_8575	0.684410885	0.000660022	-0.683750863	0.029752645	1.149589226	0.447758826	-0.104159995	0.704121592	FALSE
1752	PF3D7_1138400.e1s5_8576	0.229905086	0.198048202	-0.031856884	0.944788095	0.821049701	0.924867668	-0.006372212	0.998284684	FALSE
1753	PF3D7_1138800.3o7_5545	-0.047149634	-0.323854481	-0.276704847	0.427591034	0.828891507	0.653231038	-0.056847135	0.978054103	FALSE
1754	PF3D7_1139100.iso1.exon1.amp2_3640	-0.145386534	-0.279794367	-0.134407833	0.544734465	0.805007822	0.365299464	-0.029142772	0.978054103	FALSE
1755	PF3D7_1139200.iso1.exon2.amp1_3587	-0.368040793	-0.581941962	-0.213901168	0.132411939	0.38054789	0.241292166	-0.096957522	0.912416971	FALSE
1756	PF3D7_1139300.e2s1_8655	-0.04911722	0.260943433	0.310060653	0.343440052	0.931746462	0.58233308	0.057441007	0.978054103	FALSE
1757	PF3D7_1139300.e2s3_8649	1.164020937	1.218211519	0.054190582	0.929668362	1.013388269	1.2425599	0.008673168	0.998284684	FALSE
1758	PF3D7_1139500.1.e1s1_5751	0.278998658	0.207585286	-0.071413372	0.849674903	0.802356574	0.740898037	-0.014957015	0.993519608	FALSE
1759	PF3D7_1140000.2o2_8125	-0.208501621	-0.544819435	-0.336317814	0.375148293	0.906010688	0.7038748	-0.063277211	0.978054103	FALSE
1760	PF3D7_1140100 (renamed)_5564	-0.193097767	0.924441413	1.11753918	0.152647092	1.065261941	1.407022661	0.168033133	0.916954512	FALSE
1761	PF3D7_1140500.e1s1_7204	-0.630062274	-0.682602707	-0.052540433	0.816315468	0.368245286	0.456962927	-0.023096966	0.985932878	FALSE
1762	PF3D7_1140900.3o6_8819	-0.533517411	-0.767919499	-0.234402088	0.16599544	0.675417557	0.247056158	-0.060843259	0.924994436	FALSE
1763	PF3D7_1140900.5o6_9108	-0.593839611	-0.155457532	0.438382079	0.423076797	0.499047972	1.089840625	0.122913456	0.978054103	FALSE
1764	PF3D7_1141200.iso1.exon1.amp1_2920	-0.358654109	-0.550012024	-0.191357915	0.094601201	0.249872887	0.194104655	-0.130545302	0.912416971	FALSE
1765	PF3D7_1141400.5o5_5552	-0.414200263	-0.647643546	-0.233443284	0.278794558	0.64606317	0.373452567	-0.062581528	0.978054103	FALSE
1766	PF3D7_1141900.1o1_6461	-0.555882987	-0.274854259	0.281028728	0.270675906	0.661851515	0.456936572	0.072920272	0.978054103	FALSE
1767	PF3D7_1142800_7136	0.019251554	-0.237904584	-0.257156138	0.641172501	1.013133492	1.092597799	-0.041925756	0.978203774	FALSE
1768	PF3D7_1142900.e2_6836	-0.428156383	-0.500860819	-0.072704436	0.464541617	0.361366402	0.162408685	-0.035125589	0.978054103	FALSE
1769	PF3D7_1143000.iso1.exon1.amp1_3893	-0.541083428	-0.798562653	-0.257479224	0.087388417	0.329018021	0.253801319	-0.133465336	0.912416971	FALSE
1770	PF3D7_1143100.iso1.exon1.amp2_1039	-0.475318218	0.003130333	0.47844855	0.158995586	0.4319621	0.614945013	0.174896622	0.916954512	FALSE
1771	PF3D7_1143300.1o1_4684	-0.250507013	-0.385363039	-0.134856026	0.507506784	0.608821839	0.364190559	-0.038309225	0.978054103	FALSE
1772	PF3D7_1143900.iso1.exon2.amp1_1547	-0.332784536	-0.548422872	-0.215638336	0.496890307	0.826508692	0.589037301	-0.044723624	0.978054103	FALSE
1773	PF3D7_1144200.iso1.exon2.amp1_2141	-0.502135015	-0.461750598	0.040384417	0.749836577	0.489277442	0.201518955	0.014438671	0.980535118	FALSE
1774	PF3D7_1144500.1o1_6422	-0.574741465	-0.802028822	-0.227287357	0.062543527	0.422247729	0.184833705	-0.094035798	0.862760147	FALSE
1775	PF3D7_1144600.iso1.exon1.amp1_3019	-0.751104555	-0.345040689	0.406063866	0.424267526	0.657845108	1.002621466	0.096059488	0.978054103	FALSE
1776	PF3D7_1145200.iso1.exon1.amp1_1399	-0.485096071	-0.610480575	-0.125384503	0.388642891	0.463509238	0.251267824	-0.046965271	0.978054103	FALSE
1777	PF3D7_1145200.iso1.exon1.amp3_2211	-0.310316873	-0.320786529	-0.010469656	0.97193351	0.497904698	0.601810698	-0.003418137	0.998284684	FALSE
1778	PF3D7_1145400.e1s1_8368	-0.456761296	0.040659426	0.497420722	0.35438748	0.457526058	1.055319471	0.148943316	0.978054103	FALSE
1779	PF3D7_1145500.2o2_8228	-0.663219526	-0.870872596	-0.20765307	0.222813279	0.441077765	0.301269306	-0.080898501	0.956958241	FALSE
1780	PF3D7_1145900.iso1.exon2.amp1_376	-0.449423969	-0.104651194	0.344772775	0.32696528	0.221592533	0.688352673	0.185173887	0.978054103	FALSE
1781	PF3D7_1146000.1o1_8205	0.210015886	0.483604932	0.273589046	0.50417967	1.035865782	0.765464257	0.045173337	0.978054103	FALSE
1782	PF3D7_1146500.1o1_8151	-0.249928253	-0.561392633	-0.31146438	0.159557124	0.920658526	0.310850661	-0.059383023	0.916954512	FALSE
1783	PF3D7_1146700.iso1.exon1.amp1_3331	-0.517911746	-0.264466434	0.253445312	0.416394124	0.874085164	0.563251919	0.049976668	0.978054103	FALSE
1784	PF3D7_1146800.e3s1_4831	0.380994713	0.025396826	-0.355597888	0.362720258	0.77751243	0.741001603	-0.076616924	0.978054103	FALSE
1785	PF3D7_1147200.iso1.exon1.amp3_4233	-0.294299985	-0.60248618	-0.308186195	0.191834549	0.642793949	0.409526718	-0.082683576	0.942038663	FALSE
1786	PF3D7_1147800.1.e2s1_5119	-0.628282167	-0.34158947	0.286692697	0.563577783	0.423994402	1.010567604	0.091405127	0.978054103	FALSE
1787	PF3D7_1147800.iso2.exon1.amp1_325	-0.416059041	-0.559339124	-0.143280083	0.481644429	0.696262307	0.344560286	-0.035833589	0.978054103	FALSE
1788	PF3D7_1148900.iso1.exon1.amp1_1825	-0.482348467	-0.16420392	0.318144546	0.545478852	0.389129961	1.071375857	0.103564275	0.978054103	FALSE
1789	PF3D7_1149000.e1s1_5748	-0.2111613	0.28934878	0.500510081	0.383387571	0.685558485	1.127207025	0.111577449	0.978054103	FALSE
1790	PF3D7_1149000.s4 (renamed)_8579	-0.38350623	0.86326314	1.24676937	0.08958093	1.140757675	1.253740253	0.1800871	0.912416971	FALSE
1791	PF3D7_1149000.s6 (renamed)_7423	0.043683704	-0.678797035	-0.722480738	0.283721047	0.960333474	1.282320631	-0.120264759	0.978054103	FALSE
1792	PF3D7_1149100.iso2.exon1.amp1_4097	-0.348326469	-0.529901949	-0.18157548	0.423402552	0.622800509	0.412189531	-0.05018315	0.978054103	FALSE
1793	PF3D7_1149100.iso2.exon2.amp1_3610	-0.563258271	-0.585766554	-0.022508283	0.897525724	0.265036377	0.355668558	-0.013563594	0.998284684	FALSE
1794	PF3D7_1149200.e2s1_6829	0.455974408	0.652121961	0.196147553	0.695574895	1.239460397	0.955140899	0.026991474	0.978203774	FALSE
1795	PF3D7_1149200.e2s2_6546	-0.755291482	-0.364504413	0.390787069	0.556231232	0.838490564	1.336342171	0.071777953	0.978054103	FALSE
1796	PF3D7_1149500.3o4_7655	0.144167902	-0.392538353	-0.536706254	0.075714533	1.215485845	0.422629565	-0.077473776	0.901686205	FALSE
1797	PF3D7_1149500.e2_6825	-0.283032243	0.160519281	0.443551524	0.107877082	0.473976759	0.478209939	0.155812864	0.912416971	FALSE
1798	PF3D7_1149900.iso1.exon2.amp1_4166	0.557498894	0.774853535	0.217354641	0.77714151	1.474810582	1.525727592	0.024467707	0.982640702	FALSE
1799	PF3D7_1150000.iso1.exon2.amp1_3314	-0.254425869	0.272734889	0.527160758	0.327566376	0.739642879	1.038426575	0.112854683	0.978054103	FALSE
1800	PF3D7_1150200.iso1.exon1.amp1_412	0.415207063	0.408169838	-0.007037225	0.981686104	0.841801371	0.574408189	-0.00143659	0.998284684	FALSE
1801	PF3D7_1150300.iso1.exon1.amp1_2740	-0.431367409	-0.621781968	-0.190414559	0.435420582	0.71228724	0.437064737	-0.046183127	0.978054103	FALSE
1802	PF3D7_1150400.iso1.exon2.amp1_714	0.908357871	0.998070655	0.089712784	0.882942751	1.107893919	1.22162578	0.01333701	0.996751596	FALSE
1803	PF3D7_1200100.iso1.exon1.amp2_794	0.100681455	-0.104723071	-0.205404526	0.440535212	0.972611129	0.432915423	-0.036879383	0.978054103	FALSE
1804	PF3D7_1200200.iso1.exon1.amp1_2148	-0.133156855	0.401741606	0.534898461	0.467572995	0.855989851	1.468788913	0.094444966	0.978054103	FALSE
1805	PF3D7_1200300.e2s1_7189	0.305409427	1.4699407	1.164531273	0.156737176	1.025930082	1.487054174	0.178575569	0.916954512	FALSE
1806	PF3D7_1200400.iso1.exon1.amp2_776	-0.410785061	-0.354283886	0.056501175	0.884777005	0.628540247	0.78985023	0.01452215	0.996751596	FALSE
1807	PF3D7_1200400.iso1.exon2.amp1_720	0.502270704	1.483652833	0.981382128	0.218957631	1.078183997	1.487424558	0.144619722	0.956958241	FALSE
1808	PF3D7_1200500.iso1.exon1.amp1_2436	-0.258150901	0.096032368	0.354183269	0.479165212	0.735029446	0.990298666	0.076903105	0.978054103	FALSE
1809	PF3D7_1200600.iso1.exon2.amp3_2805	-0.542243422	-0.498670968	0.043572454	0.915400266	0.862123349	0.809127964	0.008479801	0.998284684	FALSE
1810	PF3D7_1200800.iso1.exon2.amp1_4209	-0.553215935	-0.404325893	0.148890042	0.593680962	0.443973074	0.556866002	0.054193864	0.978203774	FALSE
1811	PF3D7_1201200.2o2_4660	-0.717299338	0.22485434	0.942153678	0.194274461	1.068420587	1.334044759	0.142607525	0.947383632	FALSE
1812	PF3D7_1201300.1o1_7539	-0.287018421	-0.201196927	0.085821494	0.738060142	0.68828512	0.481159626	0.021398194	0.980535118	FALSE
1813	PF3D7_1201300_8869	-0.349303494	-0.396764705	-0.047461211	0.714066302	0.589408297	0.170744879	-0.014160598	0.978203774	FALSE
1814	PF3D7_1201400.iso1.exon1.amp1_218	1.069176819	1.691598386	0.622421567	0.293981049	1.30747928	1.095624491	0.080687373	0.978054103	FALSE
1815	PF3D7_1201400.iso1.exon1.amp2_2193	0.340444732	0.684765752	0.344321021	0.587055307	1.312215766	1.233423741	0.044018563	0.978203774	FALSE
1816	PF3D7_1202200_6847	-0.706540556	-0.707097588	-0.000557032	0.998446594	0.637185246	0.559955018	-0.00014758	0.999164392	FALSE
1817	PF3D7_1202300.e14s1_9188	-0.697529186	-0.837989706	-0.14046052	0.447638311	0.542808688	0.331041186	-0.044716159	0.978054103	FALSE
1818	PF3D7_1202300.e31s1_7502	0.136186742	-0.083460326	-0.219647069	0.741714983	0.988015617	1.350453733	-0.0353844	0.980535118	FALSE
1819	PF3D7_1202300.e33s1_5173	-0.248243969	0.132363329	0.380607297	0.315192092	0.461506393	0.731506151	0.127180182	0.978054103	FALSE
1820	PF3D7_1202300.e34s1_6594	-0.380738053	-0.605473165	-0.224735111	0.111471334	0.543903607	0.207845598	-0.072384575	0.912416971	FALSE
1821	PF3D7_1202600.e1_8857	-0.308953955	0.179567824	0.488521779	0.441390472	0.942927967	1.247591755	0.082958264	0.978054103	FALSE
1822	PF3D7_1203700.e3_8270	-0.408136364	0.361381916	0.769518281	0.116969857	0.495500772	0.863064886	0.233765548	0.912416971	FALSE
1823	PF3D7_1203900 (renamed)_7587	-0.127590973	0.021405619	0.148996593	0.715385908	0.784099128	0.809469244	0.031555372	0.978203774	FALSE
1824	PF3D7_1204300_6840	-0.478166962	-0.029721857	0.448445105	0.256370381	0.492931301	0.748463702	0.141696122	0.97539016	FALSE
1825	PF3D7_1205100.iso1.exon1.amp1_152	-0.443081413	-0.360208925	0.082872488	0.774314498	0.687330167	0.556895268	0.02049012	0.982640702	FALSE
1826	PF3D7_1205400.iso1.exon1.amp2_488	-0.498722602	-0.463648359	0.035074243	0.908491854	0.544152275	0.6132674	0.010585082	0.998284684	FALSE
1827	PF3D7_1205500.e1s1_6267	-0.529781205	-0.586285131	-0.056503926	0.846846969	0.571829438	0.581537914	-0.016437517	0.993519608	FALSE
1828	PF3D7_1205500.e1s2_5111	-0.331163468	-0.678756041	-0.347592573	0.171944428	0.920611459	0.397772484	-0.065979648	0.926254722	FALSE
1829	PF3D7_1205800.3o4_5646	-0.662873916	-0.767628999	-0.104755083	0.53198721	0.548297049	0.290708693	-0.033195926	0.978054103	FALSE
1830	PF3D7_1206000.1o1_7583	-0.513865516	-0.831858522	-0.317993006	0.106640361	0.451750981	0.336000182	-0.120343932	0.912416971	FALSE
1831	PF3D7_1206100.e2s1_6587	-0.656386688	0.117489479	0.773876167	0.231369035	0.543021202	1.221505085	0.197174999	0.956958241	FALSE
1832	PF3D7_1206600.iso1.exon1.amp1_261	-0.520737507	-0.594532368	-0.073794862	0.623820312	0.294830205	0.295549133	-0.041704711	0.978203774	FALSE
1833	PF3D7_1206900 (renamed, has duplicates)_7621	-0.407399138	-0.104669934	0.302729204	0.573089476	0.768188318	1.076731673	0.062420344	0.978054103	FALSE
1834	PF3D7_1206900.4o4_7049	0.207909665	1.093074903	0.885165238	0.263715201	0.677494845	1.5148715	0.181185121	0.978054103	FALSE
1835	PF3D7_1207000.e3s1_7223	-0.478922535	-0.258234597	0.220687939	0.658744118	0.62407607	1.015781023	0.054181533	0.978203774	FALSE
1836	PF3D7_1207200.iso1.exon1.amp3_2782	-0.551511134	-0.513104026	0.038407107	0.890815628	0.498744207	0.562128248	0.012646089	0.997630034	FALSE
1837	PF3D7_1207400.2o2_8755	-0.808856316	-0.247117467	0.561738849	0.503285077	0.616597919	1.699169403	0.115351693	0.978054103	FALSE
1838	PF3D7_1207500.e3s1_6870	-0.493814749	-0.646759406	-0.152944657	0.342394957	0.406013907	0.294498528	-0.064504156	0.978054103	FALSE
1839	PF3D7_1207600.1o1_4730	-0.219023132	0.024541962	0.243565094	0.348650921	0.525645797	0.490721207	0.077784408	0.978054103	FALSE
1840	PF3D7_1208000.iso1.exon1.amp1_342	-0.45462109	-0.347065155	0.107555935	0.846562999	0.334887543	1.159793522	0.035913336	0.993519608	FALSE
1841	PF3D7_1208100 (renamed, has duplicates)_7883	-0.699048116	-0.756585096	-0.05753698	0.706024682	0.5223597	0.261559111	-0.019173496	0.978203774	FALSE
1842	PF3D7_1208100.e2s1_5771	-0.537770857	-0.335380251	0.202390607	0.529361179	0.75060115	0.611915812	0.045801183	0.978054103	FALSE
1843	PF3D7_1208100.e2s2_5482	0.053273462	-0.605046533	-0.658319995	0.022891477	1.006447749	0.415116744	-0.114419902	0.666326899	FALSE
1844	PF3D7_1208500.iso1.exon1.amp2_seg1_1423	-0.655570695	-0.597400011	0.058170685	0.896238446	0.402388707	0.926466948	0.01981911	0.998284684	FALSE
1845	PF3D7_1208800.e1s1_6623	0.425856852	0.415060395	-0.010796457	0.988436214	1.102464164	1.519840292	-0.001556174	0.998284684	FALSE
1846	PF3D7_1208900.s1_5377	-0.545401997	0.007758852	0.553160848	0.304607519	0.590313436	1.039954254	0.140607093	0.978054103	FALSE
1847	PF3D7_1209400.e1s1_8090	-0.08193664	0.07151839	0.15345503	0.807558304	0.792380896	1.291498262	0.029662559	0.983937134	FALSE
1848	PF3D7_1209500.1.3o3_5905	-0.415534916	-0.716775411	-0.301240496	0.119333339	0.324703492	0.338562619	-0.153879822	0.912416971	FALSE
1849	PF3D7_1209500.iso2.exon2.amp1_3320	-0.320975728	-0.428028293	-0.107052565	0.406467978	0.524065012	0.19260128	-0.035809756	0.978054103	FALSE
1850	PF3D7_1209900.1o1_8507	-0.916892634	-0.793335584	0.123557051	0.79703449	0.586538364	0.985638896	0.032014747	0.982733913	FALSE
1851	PF3D7_1210100.1o1_7277	-0.145690914	-0.357788716	-0.212097802	0.457506242	0.731825671	0.529204876	-0.049636873	0.978054103	FALSE
1852	PF3D7_1210600.iso1.exon1.amp1_4021	0.466922297	0.157376925	-0.309545371	0.443578324	0.885832299	0.767674722	-0.059062724	0.978054103	FALSE
1853	PF3D7_1210600.iso1.exon1.amp2_4535	-0.306394278	-0.536722921	-0.230328643	0.471623491	0.711448068	0.609036395	-0.054776891	0.978054103	FALSE
1854	PF3D7_1211000.e3s1_5406	-0.361384439	-0.608091179	-0.246706739	0.11876051	0.633153538	0.226750984	-0.068335012	0.912416971	FALSE
1855	PF3D7_1211000.e3s2_8300	0.026085657	0.656152107	0.63006645	0.159699789	0.699025395	0.807435696	0.147510932	0.916954512	FALSE
1856	PF3D7_1211300.e2s1_4865	-0.582004469	-0.549144948	0.032859521	0.899740271	0.287824378	0.538825291	0.016829358	0.998284684	FALSE
1857	PF3D7_1211600.iso1.exon1.amp2_2832	-0.393868981	-0.687265129	-0.293396148	0.128754438	0.577884609	0.319569829	-0.088083047	0.912416971	FALSE
1858	PF3D7_1211900.e1s1_5489	0.598106534	0.502127767	-0.095978767	0.852828472	0.894234354	1.0414035	-0.01754459	0.993519608	FALSE
1859	PF3D7_1211900.e2s1_8064	-0.652331117	-0.811145929	-0.158814812	0.490928324	0.481945873	0.443540798	-0.055394334	0.978054103	FALSE
1860	PF3D7_1212000 (renamed)_7876	-0.056741166	-0.329317569	-0.272576403	0.477645342	1.09846987	0.694348953	-0.042809673	0.978054103	FALSE
1861	PF3D7_1212000.e2s1_5966	-0.43863644	-0.689128986	-0.250492546	0.058767626	0.398875434	0.208704567	-0.10916307	0.858252199	FALSE
1862	PF3D7_1212400.1o1_5266	-0.38312596	-0.823193334	-0.440067373	0.017675297	0.626694478	0.265271937	-0.122766148	0.61340006	FALSE
1863	PF3D7_1212500.1o1_4735	-0.734567543	-0.601697036	0.132870507	0.678716357	0.464916941	0.648332879	0.04531355	0.978203774	FALSE
1864	PF3D7_1212700.s1_9130	-0.57470823	-0.39845476	0.17625347	0.583958865	0.726614101	0.618446587	0.041061548	0.978203774	FALSE
1865	PF3D7_1212800_6558	-0.410323245	0.023539522	0.433862767	0.086321529	0.571985747	0.424788539	0.129692563	0.912416971	FALSE
1866	PF3D7_1212900.e1s1_8355	0.533474018	-0.02661898	-0.560092998	0.280591669	0.745729391	0.98639787	-0.120269422	0.978054103	FALSE
1867	PF3D7_1213400.e1s1_8061	0.225819941	-0.234327871	-0.460147812	0.124707484	0.795884039	0.507331497	-0.099704378	0.912416971	FALSE
1868	PF3D7_1213500.1o2_5618	-0.739291174	-0.898057821	-0.158766648	0.532698364	0.775765538	0.453593129	-0.03542965	0.978054103	FALSE
1869	PF3D7_1214000.iso1.exon2.amp1_2096	-0.242161789	-0.501887244	-0.259725455	0.128601854	0.305333679	0.30052952	-0.142017918	0.912416971	FALSE
1870	PF3D7_1215100.e1s1_8868	-0.136765139	-0.255886309	-0.11912117	0.651552146	0.801585374	0.474542797	-0.025713056	0.978203774	FALSE
1871	PF3D7_1215200.iso1.exon1.amp1_1558	-0.04343251	0.276824333	0.320256843	0.461952151	0.519345017	0.866898759	0.093880761	0.978054103	FALSE
1872	PF3D7_1215400.1o1_8489	-0.305760779	-0.634073464	-0.328312685	0.153079121	0.89858302	0.339699153	-0.064019099	0.916954512	FALSE
1873	PF3D7_1215900.1o1_5893	-0.457351488	-0.535751673	-0.078400186	0.816437349	0.721610135	0.663152431	-0.01826614	0.985932878	FALSE
1874	PF3D7_1216300.iso1.exon1.amp1_2121	-0.185850489	-0.743888296	-0.558037807	0.000829579	0.792425926	0.144345427	-0.124231342	0.241372595	FALSE
1875	PF3D7_1216500.e1s1_7177	-0.490703399	-0.066589268	0.424114131	0.177904344	0.395768694	0.576246798	0.168430691	0.935734819	FALSE
1876	PF3D7_1216600_6846	0.281516534	1.001268872	0.719752337	0.206615903	1.108665559	1.037793908	0.108952728	0.956958241	FALSE
1877	PF3D7_1216900.e1s1_6556	-0.57455804	-0.704920084	-0.130362045	0.393998928	0.589632464	0.238484098	-0.038690041	0.978054103	FALSE
1878	PF3D7_1217900.3o3_5875	-0.318136303	-0.108828878	0.209307425	0.715041863	0.648961294	1.174386856	0.048026554	0.978203774	FALSE
1879	PF3D7_1218200.e1s2_6823	-0.567421099	-0.040812222	0.526608877	0.394285354	0.602252662	1.222641846	0.125575146	0.978054103	FALSE
1880	PF3D7_1218500.e3s1_4808	-0.544021669	-0.660703707	-0.116682037	0.520476345	0.457389911	0.340158204	-0.043614022	0.978054103	FALSE
1881	PF3D7_1218600.e2s1_6329	-0.5111604	-0.29942501	0.21173539	0.454830931	0.446000783	0.556282077	0.076788671	0.978054103	FALSE
1882	PF3D7_1219000.iso1.exon1.amp1_seg1_4603	0.131378054	0.352586728	0.221208674	0.379882343	0.649760869	0.461405233	0.058371417	0.978054103	FALSE
1883	PF3D7_1219100.e1s1_9152	-0.353851606	-0.700446691	-0.346595085	0.038844268	0.800864228	0.177927322	-0.076269844	0.778321776	FALSE
1884	PF3D7_1219100.e1s2_9153	-0.555916672	-0.307905432	0.24801124	0.508375948	0.576237857	0.742943488	0.069230815	0.978054103	FALSE
1885	PF3D7_1219300.iso1.exon1.amp1_4486	-0.082637502	0.818229522	0.900867024	0.279331361	0.925841892	1.594314925	0.146920638	0.978054103	FALSE
1886	PF3D7_1219600.iso1.exon3.amp1_2541	-0.107208984	0.194238134	0.301447118	0.463338439	0.772650714	0.797108921	0.064793361	0.978054103	FALSE
1887	PF3D7_1219600.iso1.exon3.amp2_2830	-0.271616314	0.588008912	0.859625226	0.031545776	0.75471785	0.621205529	0.193329235	0.719141105	FALSE
1888	PF3D7_1219700.e1s1_6308	-0.438498282	-0.905282034	-0.466783753	0.048854646	0.633536232	0.376039133	-0.127470889	0.820283309	FALSE
1889	PF3D7_1219800.iso1.exon1.amp1_616	-0.621152597	-0.87359268	-0.252440082	0.11894759	0.601113758	0.244783491	-0.073480416	0.912416971	FALSE
1890	PF3D7_1219900.1o1_5820	-0.324790068	-0.54957179	-0.224781722	0.425821588	0.619669173	0.534864199	-0.061332509	0.978054103	FALSE
1891	PF3D7_1220100.1o1_7044	-0.263255652	-0.072355067	0.190900584	0.563084231	0.443668327	0.663004093	0.067253427	0.978054103	FALSE
1892	PF3D7_1220300.iso1.exon1.amp1_2695	-0.381905199	-0.127490969	0.254414229	0.472379971	0.327060275	0.710879036	0.109035259	0.978054103	FALSE
1893	PF3D7_1220600.2o4_7295	-0.305753143	-0.424252418	-0.118499275	0.532562833	0.539239238	0.346020753	-0.037884437	0.978054103	FALSE
1894	PF3D7_1221000.e1s1_8662	-0.213968965	-0.093452986	0.120515978	0.746099891	0.792381198	0.729129502	0.025567559	0.980535118	FALSE
1895	PF3D7_1221000.e1s3_4910	0.806692538	0.527552077	-0.279140462	0.704213862	1.128918662	1.483399369	-0.039641465	0.978203774	FALSE
1896	PF3D7_1221300.iso1.exon6.amp1_1262	0.007617562	0.74094268	0.733325118	0.264579981	0.809236981	1.249182933	0.140615146	0.978054103	FALSE
1897	PF3D7_1221400.e1s1_6610	-0.059436669	0.089061514	0.148498183	0.705356447	0.853172423	0.765543296	0.02932827	0.978203774	FALSE
1898	PF3D7_1221500.1o1_6483	-0.208569484	-0.79355521	-0.584985726	0.005815871	0.738572782	0.284751125	-0.138732857	0.454920202	FALSE
1899	PF3D7_1221600.1o1_4708	0.39348068	0.566900577	0.173419898	0.67475582	0.946764829	0.797505253	0.031033372	0.978203774	FALSE
1900	PF3D7_1221900.1o1_9091	-0.388377116	-0.645122892	-0.256745776	0.293593474	0.859936572	0.398470868	-0.05208476	0.978054103	FALSE
1901	PF3D7_1222300.e1s1_9154	-1.020129611	-0.333902119	0.686227492	0.259464756	1.006389175	1.141062226	0.111884132	0.976799056	FALSE
1902	PF3D7_1222600 (renamed, has duplicates)_6843	1.618571699	1.853750972	0.235179273	0.635242667	1.008347277	0.970455376	0.03903231	0.978203774	FALSE
1903	PF3D7_1222600.e1s1_5687	-0.341869251	-0.387894421	-0.04602517	0.884408972	0.657431867	0.625175304	-0.011730467	0.996751596	FALSE
1904	PF3D7_1222700.1o1_8121	-0.395863392	0.452843466	0.848706858	0.273373751	0.641244063	1.48771083	0.180898292	0.978054103	FALSE
1905	PF3D7_1223100.e3s1_6322	-0.630233289	-0.386617676	0.243615613	0.331224398	0.447457334	0.476946795	0.090062049	0.978054103	FALSE
1906	PF3D7_1223600.1o2_8535	0.019225044	0.17520393	0.155978886	0.794206248	1.135827407	1.19030577	0.022763816	0.982733913	FALSE
1907	PF3D7_1223600.e1_5670	0.439962963	0.746295667	0.306332704	0.64291733	1.15260794	1.314657537	0.043573055	0.978203774	FALSE
1908	PF3D7_1223600.e2s1_8263	-0.423026792	-0.55851583	-0.135489037	0.680339777	0.542289168	0.659090246	-0.040579258	0.978203774	FALSE
1909	PF3D7_1223700.1o2_5258	0.240750071	0.634441016	0.393690946	0.399975739	0.958485515	0.89035089	0.06898464	0.978054103	FALSE
1910	PF3D7_1223800.iso1.exon1.amp1_short_2872	-0.25669956	-0.140299056	0.116400504	0.799336858	0.557252917	0.939654306	0.031716892	0.982733913	FALSE
1911	PF3D7_1223900.iso1.exon1.amp1_106	-0.537061058	-0.689975161	-0.152914102	0.556897018	0.573766968	0.500735103	-0.045018343	0.978054103	FALSE
1912	PF3D7_1224200.1o5_7077	-0.390886087	-0.498234286	-0.107348199	0.413203679	0.34560478	0.240394719	-0.053319874	0.978054103	FALSE
1913	PF3D7_1224500.2o2_4969	0.48220371	0.347433932	-0.134769777	0.700100727	1.060719093	0.631558325	-0.021978684	0.978203774	FALSE
1914	PF3D7_1225600.e2s1_7774	-0.413688777	-0.810608038	-0.396919261	0.041884531	0.521808293	0.306403611	-0.131659822	0.793293038	FALSE
1915	PF3D7_1226000.e1_5411	-0.189046168	-0.075052782	0.113993386	0.757533621	0.62873279	0.741468224	0.029582381	0.980666793	FALSE
1916	PF3D7_1226100.1o1_4971	-0.384419696	-0.528554079	-0.144134382	0.370454381	0.592584656	0.258341695	-0.042495572	0.978054103	FALSE
1917	PF3D7_1226300.e1s1_6601	-0.578151689	-0.823151153	-0.244999464	0.015612332	0.406928322	0.132014895	-0.105738731	0.61340006	FALSE
1918	PF3D7_1226400.iso1.exon3.amp1_1587	-0.272417355	0.023876975	0.29629433	0.556698052	0.566633932	1.018704567	0.078011628	0.978054103	FALSE
1919	PF3D7_1226800.2o5_6721	-0.502452	-0.570897689	-0.068445689	0.832894598	0.542870804	0.654347119	-0.020503973	0.989130662	FALSE
1920	PF3D7_1227100.e1s1_4898	0.026528105	0.101960355	0.07543225	0.870588976	0.869046787	0.925119339	0.014360589	0.995523014	FALSE
1921	PF3D7_1227200.iso1.exon1.amp2_815	-0.248830225	-0.289055108	-0.040224884	0.873643093	0.778818151	0.456509904	-0.008940309	0.995846326	FALSE
1922	PF3D7_1227300.e1s2_8357	-0.530670857	-0.356081538	0.174589319	0.717837956	0.416939904	0.996893225	0.05653122	0.978203774	FALSE
1923	PF3D7_1227500.2o2_5357	-0.228351868	-0.483174379	-0.25482251	0.596833121	0.930661899	0.945586914	-0.04555289	0.978203774	FALSE
1924	PF3D7_1228100.iso1.exon2.amp1_2994	-0.055354575	0.406649102	0.462003677	0.106672154	0.852838803	0.468866247	0.094004928	0.912416971	FALSE
1925	PF3D7_1228100.iso1.exon3.amp1_2404	-0.500989474	-0.739186874	-0.2381974	0.147464102	0.523580043	0.269324936	-0.07912488	0.916954512	FALSE
1926	PF3D7_1228300.iso1.exon1.amp1_2480	-0.519691318	-0.475105664	0.044585653	0.811556823	0.500011146	0.351848083	0.015296762	0.984749192	FALSE
1927	PF3D7_1228400.s2_4794	-0.144379223	-0.34812741	-0.203748187	0.449878929	0.728276145	0.493619849	-0.048094768	0.978054103	FALSE
1928	PF3D7_1228600.e1s1_5187	-0.238778205	0.315445319	0.554223524	0.206195876	0.639415163	0.810439108	0.13982664	0.956958241	FALSE
1929	PF3D7_1228700.iso1.exon1.amp1_seg2_1438	-0.435046144	-0.613038681	-0.177992536	0.492765627	0.497820369	0.504164962	-0.059505875	0.978054103	FALSE
1930	PF3D7_1228800.e1s1_8000	-0.620601619	-0.689110828	-0.068509209	0.767969807	0.72113918	0.416626424	-0.016454282	0.982640702	FALSE
1931	PF3D7_1228800.e1s4_5484	-0.064712918	-0.356897298	-0.292184379	0.139291413	0.516544776	0.33797081	-0.097421375	0.916954512	FALSE
1932	PF3D7_1229300.1o1_8528	-0.251747664	-0.859712654	-0.60796499	0.021106004	1.07558981	0.343636221	-0.099289623	0.657569265	FALSE
1933	PF3D7_1229600.iso1.exon2.amp1_804	-0.035782827	0.060045722	0.095828549	0.868185137	1.169112802	1.143566716	0.013694073	0.994889069	FALSE
1934	PF3D7_1229600.iso1.exon2.amp2_1093	0.576739916	0.690858405	0.114118489	0.865037527	1.158861545	1.352089925	0.016092622	0.994491687	FALSE
1935	PF3D7_1230000.iso1.exon10.amp2_1646	-0.565150143	-0.50949505	0.055655093	0.812312725	0.499963682	0.460270701	0.018712236	0.984749192	FALSE
1936	PF3D7_1230000.iso1.exon2.amp1_2063	-0.592532969	-0.235712972	0.356819997	0.210324609	0.342905272	0.530293722	0.161400273	0.956958241	FALSE
1937	PF3D7_1230000.iso1.exon6.amp1_333	-0.419535208	-0.720669311	-0.301134104	0.044834465	0.558058088	0.216021512	-0.094509601	0.806563417	FALSE
1938	PF3D7_1230400.5o5_7268	-0.245011925	-0.546275242	-0.301263316	0.04391429	0.492525067	0.22610758	-0.106732437	0.8048083	FALSE
1939	PF3D7_1230600.iso1.exon1.amp1_71	-0.412683535	-0.64778169	-0.235098155	0.047338806	0.430760193	0.17311523	-0.0955209	0.820283309	FALSE
1940	PF3D7_1230700.1o1_6777	-0.147604318	-0.31872513	-0.171120811	0.516885592	0.714873379	0.486512329	-0.04114125	0.978054103	FALSE
1941	PF3D7_1231000.iso1.exon7.amp1_4124	-0.014712356	-0.389987626	-0.375275271	0.259708898	0.920310966	0.586857891	-0.070319286	0.976799056	FALSE
1942	PF3D7_1231400.iso1.exon4.amp1_924	-0.156380907	0.069068856	0.225449763	0.666415872	0.924206248	1.041232193	0.040061563	0.978203774	FALSE
1943	PF3D7_1231500.1o1_4656	-0.653296029	-0.7348564	-0.08156037	0.527130128	0.463267462	0.21329399	-0.030718038	0.978054103	FALSE
1944	PF3D7_1231600.iso1.exon1.amp2_1920	-0.542317056	-0.24023118	0.302085877	0.340654284	0.64563404	0.597206179	0.078614883	0.978054103	FALSE
1945	PF3D7_1232000.1o2_6457	-0.489711379	-0.549864515	-0.060153136	0.897108796	0.695850885	0.947471396	-0.013769138	0.998284684	FALSE
1946	PF3D7_1232100.e1_8842	-0.502878807	-0.394700048	0.108178759	0.58042119	0.533429567	0.362023939	0.034860566	0.978203774	FALSE
1947	PF3D7_1232100.e2_4807	-0.366526423	-0.111718343	0.25480808	0.570501012	0.701880578	0.895251891	0.058502776	0.978054103	FALSE
1948	PF3D7_1232600.iso1.exon1.amp1_709	-0.474310947	-0.676894473	-0.202583526	0.363985569	0.550473259	0.411161222	-0.062900551	0.978054103	FALSE
1949	PF3D7_1232700.iso1.exon1.amp1_3259	-0.615142683	-0.474136413	0.14100627	0.606063818	0.348206271	0.552854465	0.062423232	0.978203774	FALSE
1950	PF3D7_1233200.iso2.exon1.amp1_3096	-0.5947341	-1.0421358	-0.4474017	0.041826683	0.719418684	0.332206218	-0.108499786	0.793293038	FALSE
1951	PF3D7_1233200.iso2.exon1.amp2_seg2_2883	-0.650807993	-0.744425294	-0.093617301	0.593009615	0.60535105	0.297230345	-0.026935597	0.978203774	FALSE
1952	PF3D7_1233200.iso2.exon1.amp3_seg1_1729	-0.140516618	-0.400203023	-0.259686404	0.319237128	0.860854291	0.439625307	-0.052478153	0.978054103	FALSE
1953	PF3D7_1233300.s1_7401	-0.055472147	-0.499086751	-0.443614605	0.012982298	0.701938081	0.234399609	-0.110949709	0.556200725	FALSE
1954	PF3D7_1233300.s2_5950	-0.386252798	-0.005273171	0.380979627	0.440675379	0.511297847	0.984496149	0.108884453	0.978054103	FALSE
1955	PF3D7_1233400.1o4_5291	-0.079642198	0.155689789	0.235331986	0.713225825	0.989986152	1.291932201	0.038156476	0.978203774	FALSE
1956	PF3D7_1233600.e1s3_8293	-0.768414061	-0.661397718	0.107016343	0.638748071	0.449094794	0.448012651	0.039726198	0.978203774	FALSE
1957	PF3D7_1233700.iso1.exon1.amp1_1031	-0.418999811	-0.014827432	0.404172379	0.154233884	0.465442423	0.508651991	0.143189636	0.916954512	FALSE
1958	PF3D7_1233800.3o3_4664	-0.568005187	-0.380517676	0.187487511	0.416479315	0.346912737	0.451461234	0.086792154	0.978054103	FALSE
1959	PF3D7_1234300.2o2_6755	-0.328902059	-0.333894226	-0.004992166	0.987389449	0.561607878	0.635425553	-0.001458976	0.998284684	FALSE
1960	PF3D7_1234600.iso1.exon1.amp1_2569	-0.458569816	-0.684133254	-0.225563438	0.10587697	0.490738325	0.215680939	-0.080290274	0.912416971	FALSE
1961	PF3D7_1234600.iso1.exon1.amp2_3083	-0.46534376	-0.412806936	0.052536824	0.899677651	0.84216791	0.826094674	0.010419047	0.998284684	FALSE
1962	PF3D7_1234700.iso1.exon2.amp1_2955	-0.005561702	-0.480486402	-0.4749247	0.013334359	0.717669267	0.25988439	-0.11603657	0.558052873	FALSE
1963	PF3D7_1234800.e1s1_7490	-0.579495513	-0.394426099	0.185069414	0.6745989	0.540371018	0.897832755	0.052202817	0.978203774	FALSE
1964	PF3D7_1234800.e1s2_8941	0.086824896	0.273514504	0.186689608	0.634980896	0.738547193	0.77661736	0.041884563	0.978203774	FALSE
1965	PF3D7_1235000.iso1.exon2.amp1_3863	-0.545586731	-0.589456668	-0.043869936	0.901841678	0.463864092	0.730034198	-0.014609329	0.998284684	FALSE
1966	PF3D7_1235000.iso1.exon3.amp1_650	0.762314898	0.949293773	0.186978874	0.540722539	1.218283614	0.469463118	0.026882861	0.978054103	FALSE
1967	PF3D7_1235200.iso1.exon2.amp1_3400	-0.441316471	-0.397586615	0.043729855	0.888702122	0.67730681	0.613426678	0.010869806	0.9967683	FALSE
1968	PF3D7_1235200.iso1.exon2.amp2_2539	-0.140313102	-0.175996479	-0.035683377	0.912390621	0.696483239	0.637817829	-0.008616536	0.998284684	FALSE
1969	PF3D7_1235400.e1s2_5177	-0.379353818	-0.464305863	-0.084952044	0.682014245	0.433811767	0.405702275	-0.032867599	0.978203774	FALSE
1970	PF3D7_1235800.iso1.exon4.amp1_2414	-0.395545575	-0.099890103	0.295655471	0.265852727	0.722102247	0.470822052	0.070529217	0.978054103	FALSE
1971	PF3D7_1236000.1o1_6739	0.317957817	0.758552618	0.440594801	0.362896603	0.760548426	0.935442634	0.093913579	0.978054103	FALSE
1972	PF3D7_1236100.e2s1_7758	0.357867562	-0.025169936	-0.383037498	0.532066134	1.197267378	1.194219552	-0.053336144	0.978054103	FALSE
1973	PF3D7_1236200.iso1.exon1.amp2_4226	-0.473904417	0.087172737	0.561077155	0.112312825	0.637178698	0.613741112	0.147353159	0.912416971	FALSE
1974	PF3D7_1236300.1o1_5000	-0.657600738	-0.480609791	0.176990947	0.378703906	0.467226927	0.375069241	0.064420684	0.978054103	FALSE
1975	PF3D7_1236500.1o1_7853	-0.27421575	-0.382892995	-0.108677244	0.716860302	0.658845097	0.583442791	-0.027827491	0.978203774	FALSE
1976	PF3D7_1237300.iso1.exon3.amp1_116	-0.381824911	-0.551000003	-0.169175092	0.251147518	0.34300347	0.267403226	-0.084054833	0.968457025	FALSE
1977	PF3D7_1237400.3o3_5573	-0.409695351	-0.695932644	-0.286237293	0.102619782	0.475455727	0.291923108	-0.104002178	0.912416971	FALSE
1978	PF3D7_1237400.e3_7403	-0.18740053	-0.191944202	-0.004543673	0.991006029	0.641055798	0.818422987	-0.00114201	0.998284684	FALSE
1979	PF3D7_1237900.iso1.exon1.amp1_4591	-0.633355671	-0.451375883	0.181979788	0.661053416	0.558331086	0.841062422	0.050854927	0.978203774	FALSE
1980	PF3D7_1238200.iso1.exon1.amp1_3886	-0.647405361	-0.805341307	-0.157935946	0.365925978	0.518899506	0.308164846	-0.052656794	0.978054103	FALSE
1981	PF3D7_1238400.iso1.exon4.amp1_630	-0.017757178	0.347896177	0.365653355	0.392392242	0.729198131	0.826293201	0.082285935	0.978054103	FALSE
1982	PF3D7_1238600.iso1.exon1.amp1_1581	-0.459134594	-0.18669182	0.272442774	0.624851816	0.693819069	1.129532982	0.060161251	0.978203774	FALSE
1983	PF3D7_1238800.e1s1_6061	0.481849693	0.125979218	-0.355870475	0.20858944	0.923413976	0.468645975	-0.067056265	0.956958241	FALSE
1984	PF3D7_1239200.e1s2_7139	-0.74939908	-0.921145097	-0.171746017	0.668075708	0.674755638	0.800730025	-0.041491179	0.978203774	FALSE
1985	PF3D7_1239400.1o1_5240	-0.964058345	-0.519950635	0.444107709	0.300998414	0.652880556	0.81864178	0.109930365	0.978054103	FALSE
1986	PF3D7_1239600.1o1_9028	-0.411238271	-0.58077655	-0.169538278	0.30021223	0.465576662	0.288954061	-0.062876754	0.978054103	FALSE
1987	PF3D7_1239700.e1s1_5983	0.326758238	0.318921935	-0.007836303	0.985144082	0.850005221	0.835053392	-0.001539506	0.998284684	FALSE
1988	PF3D7_1239800.s5_6570	0.708238957	0.604982816	-0.103256141	0.596766576	0.850368674	0.273166051	-0.021328024	0.978203774	FALSE
1989	PF3D7_1240000.iso1.exon1.amp1_735	-0.632505269	-0.772689333	-0.140184065	0.577264012	0.606352168	0.477648434	-0.039371013	0.978203774	FALSE
1990	PF3D7_1240300.iso1.exon1.amp2_2520	-0.248950997	-0.097378568	0.15157243	0.525453103	0.617672986	0.444900316	0.04203801	0.978054103	FALSE
1991	PF3D7_1240300.iso1.exon2.amp1_4487	0.645802891	1.368154422	0.722351531	0.355567519	1.145919429	1.513562929	0.100967775	0.978054103	FALSE
1992	PF3D7_1240400.iso1.exon2.amp1_1013	1.072433317	2.783775885	1.711342568	0.001528401	1.037235993	0.66794935	0.284387244	0.259773383	FALSE
1993	PF3D7_1240600.iso1.exon2.amp1_2168	-0.161668687	0.264845841	0.426514528	0.317046789	0.740914543	0.809744507	0.094923418	0.978054103	FALSE
1994	PF3D7_1240900.iso1.exon3.amp1_1880	0.757533173	1.885136006	1.127602833	0.046220009	1.237504776	0.906426592	0.155933455	0.811348251	FALSE
1995	PF3D7_1240900.iso1.exon4.amp2_3972	-0.229711009	-0.068636862	0.161074147	0.768199235	0.74234698	1.114356195	0.033880936	0.982640702	FALSE
1996	PF3D7_1241300.iso1.exon1.amp1_2759	0.119405693	-0.41052606	-0.529931753	0.082417619	0.78265948	0.504384014	-0.116702974	0.912416971	FALSE
1997	PF3D7_1241400.iso1.exon1.amp2_seg2_276	-0.291852335	-0.507656384	-0.215804049	0.534759778	1.351149662	0.545077976	-0.027951685	0.978054103	FALSE
1998	PF3D7_1241700.e2s1_7179	-0.371607621	-0.527884207	-0.156276587	0.236919234	0.461929785	0.21374911	-0.059021119	0.956958241	FALSE
[truncated: 806 more rows]
