# Supplementary material for: Proteome-wide analysis of a malaria vaccine study reveals personalized humoral immune profiles in Tanzanian adults
Source: eLife. 2020 Jul 14;9:e53080. doi: 10.7554/eLife.53080 (PMC7386907; doi:10.7554/eLife.53080)
Supplement: Figure 5—source data 2. [file elife-53080-fig5-data2.csv]

Protected versus non protected after immunization
	protein_ID	mean_seorpositivy_group1	mean_seorpositivy_group2	log_FC	p_value	sd1	sd2	size_eff	adj.p_value	is_threshold_reached
1	MAL13P1.303e4s1_6254	-0.594875562	-0.842898499	-0.248022937	0.021298621	0.414724058	0.146582986	-0.104904217	0.683842929	FALSE
2	MAL8P1.143_14o15_5934	-0.064292212	1.078746409	1.143038621	0.178683556	1.050790118	1.557015235	0.170336797	0.914975982	FALSE
3	MAL8P1.143_3o15_6506	-0.186074834	-0.128061471	0.058013363	0.91763528	0.926436475	1.135078976	0.010157681	0.991159216	FALSE
4	PF3D7_0100100.iso1.exon2.amp1_1871	0.2269904	0.992654176	0.765663777	0.260433746	1.259825225	1.266812967	0.101229787	0.915060736	FALSE
5	PF3D7_0100200.iso1.exon1.amp1_706	-0.024786511	0.50429338	0.529079891	0.500110727	0.97012501	1.569161645	0.083690835	0.926395115	FALSE
6	PF3D7_0100300.iso1.exon1.amp1_1010	-0.132476694	0.169778297	0.302254991	0.469741481	0.904222358	0.798725324	0.056404575	0.921428022	FALSE
7	PF3D7_0100300.iso1.exon2.amp1_1317	-0.164974159	-0.162454323	0.002519835	0.990509291	0.67822436	0.376924857	0.000644463	0.998822427	FALSE
8	PF3D7_0100400.iso1.exon2.amp1_991	0.302773909	1.318054238	1.015280329	0.296624931	1.102755085	1.871575029	0.139557765	0.915060736	FALSE
9	PF3D7_0100600.iso1.exon1.amp1_2163	1.067293041	2.023067416	0.955774374	0.208636851	1.355676816	1.393574046	0.1171344	0.915060736	FALSE
10	PF3D7_0100800.iso1.exon2.amp1_133	-0.224556722	-0.1139539	0.110602822	0.671267873	0.752831587	0.477174252	0.025342733	0.936977941	FALSE
11	PF3D7_0100900.iso1.exon1.amp1_2446	0.287355384	1.547867626	1.260512242	0.059996669	0.908373433	1.099382004	0.22552656	0.844903507	FALSE
12	PF3D7_0101000.iso1.exon1.amp1_2157	-0.228314817	-0.052566171	0.175748646	0.681786891	1.040337001	0.819061057	0.028769888	0.93820426	FALSE
13	PF3D7_0101100.iso1.exon1.amp1_3004	-0.438163673	-0.412026858	0.026136815	0.926777321	0.810261659	0.527150727	0.005557212	0.99230528	FALSE
14	PF3D7_0101300.iso1.exon2.amp1_4146	0.169858103	1.157180075	0.987321972	0.1966845	1.063534221	1.40967119	0.148601332	0.914975982	FALSE
15	PF3D7_0101600.iso1.exon1.amp1_3887	0.258560235	0.849872534	0.591312299	0.33512549	1.328435304	1.146287511	0.075262258	0.915060736	FALSE
16	PF3D7_0101800.iso1.exon1.amp1_2719	0.668833432	1.284678037	0.615844605	0.454570266	1.195029785	1.624499931	0.082108908	0.920899767	FALSE
17	PF3D7_0101900.iso1.exon1.amp1_123	0.394287917	0.775347504	0.381059587	0.55983487	1.070548461	1.296969336	0.057840706	0.933789205	FALSE
18	PF3D7_0102200.e1s1_8021	-1.082879898	-0.671232197	0.411647702	0.062660723	0.569713014	0.358420645	0.124683379	0.844903507	FALSE
19	PF3D7_0102200.e2s1_7477	0.91174952	1.207612555	0.295863035	0.727210658	1.44023864	1.700808125	0.033511024	0.957663815	FALSE
20	PF3D7_0102200.e2s2_7188	0.745626938	1.749273897	1.003646958	0.159585349	1.132297487	1.284999989	0.145422451	0.914975982	FALSE
21	PF3D7_0102500.e1s2_8945	-0.581304157	-0.195764059	0.385540098	0.618879275	0.583507423	1.590201012	0.084111029	0.933789205	FALSE
22	PF3D7_0102600.2o3_6170	-0.117213976	-0.068615652	0.048598324	0.937789751	0.82690251	1.27759822	0.009117773	0.992371014	FALSE
23	PF3D7_0102700.2o2_7571	-0.608563836	-0.410990225	0.197573611	0.539119495	0.667442523	0.62283162	0.049693995	0.933789205	FALSE
24	PF3D7_0103400.e1s1_5925	-0.273684494	-0.156303418	0.117381076	0.700913825	0.668882622	0.594890088	0.029593693	0.945022288	FALSE
25	PF3D7_0103500.2o7_7085	-0.729958265	-0.194795821	0.535162444	0.341627566	0.826668588	1.085807973	0.103794561	0.915060736	FALSE
26	PF3D7_0103800.e4s1_7155	-0.580545985	-0.484258362	0.096287623	0.741719845	0.617119862	0.572807879	0.026206932	0.960360308	FALSE
27	PF3D7_0103900.1o1_9076	0.10434852	0.046521273	-0.057827248	0.892839569	0.786265904	0.860225651	-0.012125804	0.987698579	FALSE
28	PF3D7_0104000.3o3_6106	-0.443392425	-0.122860618	0.320531807	0.412835066	0.960592659	0.727413618	0.056980262	0.917134742	FALSE
29	PF3D7_0104100.1o2_5053	-0.770494964	-0.743134597	0.027360367	0.912587179	0.585180681	0.4831525	0.007934138	0.991159216	FALSE
30	PF3D7_0104100.2o2_5342	-0.427724802	0.215506124	0.643230926	0.287918718	0.838923934	1.154351495	0.121882862	0.915060736	FALSE
31	PF3D7_0104600.e1s1_7213	-0.950628909	-0.664690132	0.285938777	0.541698504	0.578678571	0.94211067	0.075704293	0.933789205	FALSE
32	PF3D7_0105600.e2_4833	-0.675342668	-0.589942695	0.085399973	0.601577773	0.511532634	0.290315049	0.02893596	0.933789205	FALSE
33	PF3D7_0105700.iso1.exon1.amp2_233	-0.76630309	-0.09405433	0.67224876	0.317765298	0.632665092	1.307504166	0.15166474	0.915060736	FALSE
34	PF3D7_0105700.iso1.exon1.amp3_522	-0.329770802	0.032071163	0.361841966	0.45506057	0.665311239	0.958160342	0.08567641	0.920899767	FALSE
35	PF3D7_0105900.iso1.exon1.amp1_short_2005	-0.536657237	-0.569216647	-0.03255941	0.887308969	0.391261483	0.463462506	-0.013568862	0.985408067	FALSE
36	PF3D7_0106200.iso1.exon1.amp1_3577	-0.390415333	-0.452498103	-0.06208277	0.698190761	0.435619913	0.298534982	-0.024485029	0.944376151	FALSE
37	PF3D7_0106500.iso1.exon1.amp1_2562	-0.669779677	-0.271573262	0.398206415	0.380217687	0.57272086	0.888616166	0.107761792	0.915060736	FALSE
38	PF3D7_0107900.iso1.exon1.amp1_696	-0.700515395	-0.701404494	-0.000889099	0.998136555	0.761961744	0.756234851	-0.000194638	0.999858995	FALSE
39	PF3D7_0108000.e1s1_7463	-0.454145934	-0.807806187	-0.353660254	0.001170474	0.540308952	0.07783921	-0.115559721	0.218800588	FALSE
40	PF3D7_0108300.s1_7972	-0.047875407	0.185417769	0.233293176	0.695974886	1.001066999	1.196228606	0.037949066	0.944366085	FALSE
41	PF3D7_0108300.s2_7111	0.693430087	0.458988014	-0.234442073	0.405788215	1.072273785	0.444797462	-0.038241397	0.915831356	FALSE
42	PF3D7_0108300.s3_7689	5.63E-05	0.408787349	0.408731073	0.493749869	1.085308148	1.166503011	0.062232915	0.926395115	FALSE
43	PF3D7_0108400.iso1.exon1.amp1_short_3733	-0.449741848	-0.67460336	-0.224861512	0.213791903	0.379859884	0.328077996	-0.100082537	0.915060736	FALSE
44	PF3D7_0108400.iso1.exon7.amp1_45	-0.281745621	0.224602795	0.506348415	0.1539061	0.51085171	0.639186049	0.160239582	0.914975982	FALSE
45	PF3D7_0108600.iso1.exon4.amp1_4380	-0.089767823	-0.210397296	-0.120629473	0.45296518	0.540858133	0.27336047	-0.03881233	0.920899767	FALSE
46	PF3D7_0108600.iso1.exon5.amp1_634	-0.385526662	-0.476886627	-0.091359965	0.563361217	0.32480486	0.307203878	-0.047156464	0.933789205	FALSE
47	PF3D7_0108700.e1s1_7776	-0.199382214	0.425094285	0.6244765	0.162204684	0.84787579	0.798946142	0.123524745	0.914975982	FALSE
48	PF3D7_0108800.iso1.exon6.amp1_1233	-0.231921352	0.260234756	0.492156108	0.145329671	0.505878174	0.604436449	0.158425888	0.912603236	FALSE
49	PF3D7_0109200.iso1.exon1.amp1_2413	-0.743907994	-0.60171466	0.142193334	0.57232435	0.335951049	0.506442181	0.066029003	0.933789205	FALSE
50	PF3D7_0109800.1o1_7336	-0.515398329	-0.238259079	0.27713925	0.590603801	0.519953063	1.048092162	0.076731241	0.933789205	FALSE
51	PF3D7_0109900.iso2.exon16.amp1_324	-0.467631587	-0.694589613	-0.226958026	0.33922551	0.715477277	0.415382637	-0.054930466	0.915060736	FALSE
52	PF3D7_0110000.1o1_8428	-0.512796456	0.129599499	0.642395955	0.269018582	0.99708749	1.0906288	0.106225772	0.915060736	FALSE
53	PF3D7_0110500.e1s2_5766	-0.077603668	0.411735322	0.48933899	0.329633124	0.938977229	0.950952143	0.086733139	0.915060736	FALSE
54	PF3D7_0110500.e1s3_5188	-0.982771839	-1.179245151	-0.196473312	0.353371589	0.680779862	0.362697916	-0.050136148	0.915060736	FALSE
55	PF3D7_0110600.e1s1_6533	-0.644653255	-0.661345221	-0.016691966	0.94022352	0.589100579	0.420927281	-0.004856343	0.992371014	FALSE
56	PF3D7_0110600.e3_5665	-0.379405758	-0.214896085	0.164509672	0.75411969	0.631603372	1.076017969	0.039441815	0.963667248	FALSE
57	PF3D7_0110700.e1s1_7186	-0.662233028	-0.540008479	0.122224548	0.613520199	0.322083302	0.488699616	0.059114598	0.933789205	FALSE
58	PF3D7_0110800.iso1.exon3.amp1_2717	-0.571663766	-0.452121269	0.119542497	0.482105411	0.474059112	0.309990837	0.043431817	0.925003338	FALSE
59	PF3D7_0111000.e1s2_6049	-0.558027971	0.140926467	0.698954439	0.068230469	0.721435657	0.636532137	0.163497718	0.862652712	FALSE
60	PF3D7_0111000.e5s1_5681	-0.495117411	-0.591270752	-0.096153342	0.417848953	0.346438359	0.211986559	-0.047954671	0.917134742	FALSE
61	PF3D7_0111300.iso1.exon1.amp1_1701	-0.495780342	-0.206556779	0.289223563	0.042671929	0.441998621	0.219036317	0.113938946	0.813959796	FALSE
62	PF3D7_0111500.e4s1_8619	0.468220617	0.668487712	0.200267096	0.490189261	0.851349829	0.52185352	0.040640599	0.926395115	FALSE
63	PF3D7_0111500.e5s1_5099	-0.47228701	-0.835424309	-0.363137299	0.129319652	0.668267433	0.402553305	-0.093953508	0.883745191	FALSE
64	PF3D7_0111700.iso1.exon1.amp1_961	-0.491137963	-0.501413307	-0.010275344	0.941799606	0.369952574	0.266589883	-0.004757941	0.992411159	FALSE
65	PF3D7_0112000.3o4_5862	0.566764984	0.918067525	0.35130254	0.291527159	1.013532636	0.575821411	0.060073021	0.915060736	FALSE
66	PF3D7_0112100.1o1_6684	0.112847391	0.777846757	0.664999366	0.257768525	0.767494168	1.112208247	0.136318619	0.915060736	FALSE
67	PF3D7_0112200.iso1.exon1.amp2_183	0.095164587	0.311736631	0.216572044	0.455751258	0.73097719	0.540131206	0.050674233	0.920899767	FALSE
68	PF3D7_0113100.iso1.exon1.amp1_4475	-0.19518617	0.510506913	0.705693083	0.263132255	0.731309938	1.199716366	0.147560502	0.915060736	FALSE
69	PF3D7_0113100.iso1.exon2.amp1_4270	-1.002805195	-0.652891921	0.349913274	0.217335794	0.563288789	0.517742931	0.10443708	0.915060736	FALSE
70	PF3D7_0113100.iso1.exon2.amp2_3349	-0.674829564	-0.246998685	0.427830879	0.268434576	0.571423139	0.730977918	0.120594253	0.915060736	FALSE
71	PF3D7_0113300.2o2_5313	-1.280199258	-0.688524485	0.591674773	0.14424623	1.01136874	0.699542488	0.100458357	0.911290123	FALSE
72	PF3D7_0113400.2o2_8752	0.1129242	0.693488643	0.580564443	0.27172694	1.011919721	0.984148384	0.09590985	0.915060736	FALSE
73	PF3D7_0113800.2o4_7664	0.000213763	0.535611669	0.535397906	0.081496894	0.801874992	0.506549133	0.115192674	0.865595802	FALSE
74	PF3D7_0113800.3o4_7092	-0.326844258	-0.649714638	-0.32287038	0.01952821	0.614828019	0.162820843	-0.092428149	0.659854288	FALSE
75	PF3D7_0113900.2o2_5532	-0.538145333	0.549827175	1.087972508	0.124286654	0.488728453	1.253554355	0.29151333	0.881162544	FALSE
76	PF3D7_0114000.e2s2_8371	-0.734927594	-0.422643644	0.31228395	0.454607361	0.569849867	0.826288773	0.086207307	0.920899767	FALSE
77	PF3D7_0114100.iso1.exon1.amp1_2718	-0.176325615	0.136830998	0.313156613	0.600805088	0.8617568	1.202368566	0.057611171	0.933789205	FALSE
78	PF3D7_0115000.e1s1_6895	-0.195519735	-0.014404166	0.181115569	0.571472147	0.474200559	0.640101337	0.060934246	0.933789205	FALSE
79	PF3D7_0115200.iso1.exon2.amp1_719	0.169494982	0.495418971	0.325923989	0.450337739	0.913002526	0.825089928	0.060112045	0.920899767	FALSE
80	PF3D7_0115300.iso1.exon2.amp1_1279	-0.347780981	1.051898441	1.399679422	0.081375752	0.638470029	1.355520141	0.309937181	0.865595802	FALSE
81	PF3D7_0115400.iso1.exon2.amp1_2714	0.31111837	1.219282837	0.908164467	0.237084467	1.244393844	1.430999757	0.11951234	0.915060736	FALSE
82	PF3D7_0115700.iso1.exon1.amp1_1583	0.745123604	2.4504294	1.705305795	0.010513868	1.284776949	0.947646196	0.227045398	0.517208509	FALSE
83	PF3D7_0115700.iso1.exon2.amp2_4262	-0.783032867	-0.293786143	0.489246723	0.29500023	0.498940004	0.899641805	0.146167338	0.915060736	FALSE
84	PF3D7_0200100 (renamed)_4770	-0.033723751	0.099485061	0.133208812	0.674566548	0.911811618	0.581883734	0.025192475	0.937306541	FALSE
85	PF3D7_0200100.iso1.exon2.amp1_2746	0.463008206	1.778486438	1.315478232	0.055680829	1.01700643	1.120538697	0.213062335	0.837609343	FALSE
86	PF3D7_0200200.iso1.exon1.amp1_1284	0.571440953	0.929164385	0.357723431	0.64020841	1.111933891	1.542109404	0.051063185	0.933789205	FALSE
87	PF3D7_0200400.iso1.exon1.amp1_1275	0.485154544	1.225021199	0.739866655	0.43033195	1.32671521	1.845781523	0.088460567	0.917134742	FALSE
88	PF3D7_0200500.iso1.exon1.amp1_3303	0.47024334	0.52646497	0.056221629	0.950124811	1.289820606	1.836845169	0.006882324	0.99537408	FALSE
89	PF3D7_0200600.iso1.exon1.amp1_2442	0.47710179	1.171954701	0.694852911	0.414798215	0.959776887	1.686078423	0.108718264	0.917134742	FALSE
90	PF3D7_0200700.iso1.exon1.amp1_700	-0.28801986	-0.015142231	0.272877629	0.4896869	0.784385373	0.764379083	0.058144105	0.926395115	FALSE
91	PF3D7_0200800.iso1.exon3.amp1_406	-0.210921507	0.514930932	0.725852439	0.188051338	0.421603909	1.020865088	0.231197699	0.914975982	FALSE
92	PF3D7_0201000.iso1.exon1.amp1_3595	-0.168714546	0.751753176	0.920467722	0.065996818	0.620926182	0.828624915	0.237000632	0.853844047	FALSE
93	PF3D7_0201200.iso1.exon2.amp1_3603	0.460327781	2.124732941	1.66440516	0.085519359	1.127101692	1.645837936	0.231959399	0.866049105	FALSE
94	PF3D7_0201300.iso1.exon2.amp1_119	0.976522052	1.792706266	0.816184214	0.27016039	1.29378997	1.387802584	0.10427241	0.915060736	FALSE
95	PF3D7_0201500.2o2_5533	-0.595120513	-0.21548974	0.379630773	0.45991374	0.419436509	1.031648731	0.120734731	0.920899767	FALSE
96	PF3D7_0201700.2o2_8813	-0.409827375	0.671120141	1.080947516	0.241263678	0.425140365	1.755980651	0.253952906	0.915060736	FALSE
97	PF3D7_0201800.iso1.exon1.amp1_4451	0.042750567	0.863492274	0.820741707	0.262851772	0.803592535	1.396098363	0.15384508	0.915060736	FALSE
98	PF3D7_0201800.iso1.exon2.amp1_3566	-0.651024771	-0.277014	0.374010771	0.275247184	0.31798567	0.657610182	0.167843083	0.915060736	FALSE
99	PF3D7_0201900.e2s1_5490	-0.551354577	-0.54805284	0.003301738	0.985964771	0.29434269	0.381473221	0.001802724	0.998822427	FALSE
100	PF3D7_0202000.e2s1_8364	-0.651405866	-0.434130952	0.217274914	0.59647197	0.573601068	0.825362548	0.059682183	0.933789205	FALSE
101	PF3D7_0202300.2o2_8437	-0.704320365	-0.478858845	0.22546152	0.764646063	1.119748353	1.527550818	0.032059824	0.965879132	FALSE
102	PF3D7_0202400.e1s1_5756	-0.529312059	-0.53964926	-0.010337201	0.982108698	0.782952396	0.93112783	-0.002151509	0.998822427	FALSE
103	PF3D7_0202500.1o1_7250	0.353765892	0.779174168	0.425408276	0.599224213	1.418059912	1.60422843	0.049239311	0.933789205	FALSE
104	PF3D7_0202600.iso2.exon1.amp1_2518	-0.51573137	-0.698914959	-0.183183589	0.286215409	0.552416834	0.291015688	-0.057628785	0.915060736	FALSE
105	PF3D7_0202700.iso1.exon1.amp1_2186	-0.193988859	-0.270501507	-0.076512648	0.620613083	0.406774482	0.289254635	-0.032247473	0.933789205	FALSE
106	PF3D7_0203000.iso1.exon1.amp1_538	-0.591761599	-0.469649455	0.122112143	0.708877251	0.867565393	0.614048979	0.024137523	0.949521883	FALSE
107	PF3D7_0203000.iso1.exon1.amp2_1055	-0.123799253	0.345658915	0.469458168	0.461763578	0.885456015	1.262497311	0.083692312	0.920899767	FALSE
108	PF3D7_0203100.e1s1_6609	-0.482970465	-0.359773378	0.123197087	0.561184915	0.469386408	0.407751917	0.044352813	0.933789205	FALSE
109	PF3D7_0203100.e2s2_7084	0.408046157	0.862050784	0.454004627	0.312818092	0.862666715	0.847004168	0.087889276	0.915060736	FALSE
110	PF3D7_0203100.e2s3_5060	-0.403109529	-0.351223442	0.051886088	0.923245399	1.100869683	1.066398485	0.007882359	0.99230528	FALSE
111	PF3D7_0203200.1o1_5016	-0.378782658	-0.504119638	-0.12533698	0.6083877	0.750936241	0.437376275	-0.028899011	0.933789205	FALSE
112	PF3D7_0203800.iso1.exon12.amp1_2119	-0.392407404	-0.342714434	0.04969297	0.838860369	0.657437534	0.459412885	0.012971787	0.981270492	FALSE
113	PF3D7_0204100.iso1.exon1.amp1_247	-0.458240598	-0.536097526	-0.077856928	0.677127739	0.784092174	0.27499698	-0.017419745	0.93820426	FALSE
114	PF3D7_0204100.iso1.exon1.amp2_536	-0.378811108	-0.512951798	-0.13414069	0.490784602	0.576787893	0.348951447	-0.04020269	0.926395115	FALSE
115	PF3D7_0204100.iso1.exon1.amp3_476	-0.111892476	0.018421272	0.130313748	0.679734819	0.580187331	0.62672776	0.037092109	0.93820426	FALSE
116	PF3D7_0204300.1o1_4751	-0.474467854	-0.079444207	0.395023647	0.416765904	0.945890663	0.93369278	0.069702773	0.917134742	FALSE
117	PF3D7_0204500.1o1_5582	-0.350681462	-0.484683143	-0.134001681	0.339615244	0.474273739	0.234935001	-0.049197821	0.915060736	FALSE
118	PF3D7_0204600.iso1.exon1.amp2_seg2_1153	-0.368210531	0.060999253	0.429209784	0.490482575	0.314538195	1.261976647	0.138989212	0.926395115	FALSE
119	PF3D7_0204800.iso1.exon1.amp1_3895	-0.588066049	-0.20486708	0.383198969	0.449920293	0.563007355	1.010249082	0.1015986	0.920899767	FALSE
120	PF3D7_0206000.s2_8261	0.221990243	0.368495898	0.146505655	0.681090552	0.915118807	0.673383397	0.027389288	0.93820426	FALSE
121	PF3D7_0206100.1o4_7281	-0.822240765	-0.749564876	0.072675889	0.828450679	0.66113039	0.665679088	0.01830708	0.980022573	FALSE
122	PF3D7_0206200.1o1_7052	-0.247186751	0.035563617	0.282750367	0.613743178	0.767252288	1.129720228	0.057785193	0.933789205	FALSE
123	PF3D7_0206800_8292	0.906131546	2.054726311	1.148594765	0.006424224	1.472746224	0.567755337	0.136605122	0.414113259	FALSE
124	PF3D7_0206900.1.1o2_4674	0.311835789	0.534599278	0.22276349	0.666654773	1.2332147	0.990594949	0.030717583	0.936894427	FALSE
125	PF3D7_0206900.1.2o2_5836	-0.481196814	-0.883317314	-0.402120501	0.092423006	0.932890084	0.34531613	-0.075554989	0.874701525	FALSE
126	PF3D7_0206900.1.e1_8561	-0.384514116	-0.149912166	0.23460195	0.587733041	1.164270086	0.803583098	0.034605303	0.933789205	FALSE
127	PF3D7_0207000.1o2_6703	0.535176591	1.692979581	1.15780299	0.195366071	1.793989376	1.616993033	0.108701965	0.914975982	FALSE
128	PF3D7_0207000.2o2_6414	-0.64090578	0.360487092	1.001392872	0.342272717	0.811558457	2.068267475	0.16204916	0.915060736	FALSE
129	PF3D7_0207000.e1_7116	0.438234069	1.442205435	1.003971366	0.269777232	1.795817968	1.689652489	0.093776492	0.915060736	FALSE
130	PF3D7_0207100.s1_9173	-0.578455733	0.377633283	0.956089016	0.291678513	0.567348426	1.75595061	0.200964854	0.915060736	FALSE
131	PF3D7_0207200_6262	-0.589259629	-0.8731003	-0.283840671	0.04065439	0.480087469	0.205238456	-0.103341415	0.809964087	FALSE
132	PF3D7_0207300.iso1.exon2.amp1_4172	-0.490237453	-0.261672517	0.228564936	0.497532836	0.594492901	0.660052758	0.063265674	0.926395115	FALSE
133	PF3D7_0207300.iso1.exon5.amp1_1780	-0.429416573	-0.558483659	-0.129067086	0.254453515	0.268053619	0.205127056	-0.082163411	0.915060736	FALSE
134	PF3D7_0207400.4o4_5635	-0.494496155	-0.313143705	0.18135245	0.545456719	0.370859792	0.603360529	0.074932892	0.933789205	FALSE
135	PF3D7_0207500.e1s1_8609	0.232357423	0.132078574	-0.100278849	0.847799945	0.994411712	1.041736968	-0.016716807	0.981270492	FALSE
136	PF3D7_0207500.e3s1_8088	0.240144793	0.505214232	0.265069438	0.653862927	0.83810505	1.194036246	0.049932878	0.933789205	FALSE
137	PF3D7_0207600.e2s1_8341	0.085953556	0.402736994	0.316783438	0.572289837	0.974317361	1.10972323	0.053315617	0.933789205	FALSE
138	PF3D7_0207600.e4s1_8076	-0.487595975	-0.897953498	-0.410357524	0.121137948	1.06282059	0.379079722	-0.067717599	0.881162544	FALSE
139	PF3D7_0207700.2o4_5642	0.266270186	2.380267814	2.113997628	0.006498211	1.26368393	1.042946384	0.283888133	0.414113259	FALSE
140	PF3D7_0207700.4o4_8238	-0.626338608	-0.373494056	0.252844552	0.533123317	0.308339717	0.824337579	0.105347526	0.933789205	FALSE
141	PF3D7_0208000.4o4_7083	-0.560221465	-0.335135823	0.225085642	0.507887826	0.444629166	0.679031431	0.078744714	0.926395115	FALSE
142	PF3D7_0208100.iso2.exon10.amp1_1520	-0.056826003	0.101692157	0.158518161	0.656868564	0.695252884	0.703074111	0.037952445	0.934954037	FALSE
143	PF3D7_0208100.iso2.exon13.amp1_3822	0.013881652	-0.225161825	-0.239043477	0.604012343	0.605801928	0.930460896	-0.061299444	0.933789205	FALSE
144	PF3D7_0208700.iso2.exon4.amp1_1767	-0.544158527	-0.586728011	-0.042569484	0.812836448	0.341552324	0.358146091	-0.02065864	0.977774946	FALSE
145	PF3D7_0208900.e1s3_5063	-1.017991609	-1.130194899	-0.112203291	0.749415038	0.736672102	0.689661668	-0.025561238	0.962376195	FALSE
146	PF3D7_0209100.2o3_8219	-0.286957023	-0.188691733	0.098265289	0.586952884	0.658725136	0.29782828	0.026040059	0.933789205	FALSE
147	PF3D7_0209300.1o2_6694	-0.463794789	-0.133119509	0.330675279	0.396193466	0.335987582	0.772856639	0.134979233	0.915060736	FALSE
148	PF3D7_0209400.2o7_8465	-0.811167178	-1.144715563	-0.333548385	0.059921446	0.621872281	0.266373488	-0.093747293	0.844903507	FALSE
149	PF3D7_0209800.e2_6830	-0.273595826	0.177917949	0.451513776	0.220402181	0.721402573	0.674064835	0.105057345	0.915060736	FALSE
150	PF3D7_0210200.iso1.exon2.amp2_seg1_2597	2.011868052	2.66065325	0.648785198	0.16777707	1.167164523	0.821449274	0.095356138	0.914975982	FALSE
151	PF3D7_0210300.e2_9137	-0.724752934	-0.148326767	0.576426167	0.233989483	0.571285639	0.911145711	0.155368682	0.915060736	FALSE
152	PF3D7_0210600.3o5_4701	-0.237918282	-0.265486448	-0.027568166	0.939978096	0.54062405	0.746850699	-0.008099907	0.992371014	FALSE
153	PF3D7_0210700.1o1_6705	-0.346247975	-0.08434587	0.261902105	0.418475429	0.506215005	0.6321539	0.083667576	0.917134742	FALSE
154	PF3D7_0211100.iso1.exon1.amp1_3153	-0.321295853	-0.263488056	0.057807797	0.881856832	0.937057113	0.750049537	0.010493398	0.985408067	FALSE
155	PF3D7_0211100.iso1.exon1.amp2_1349	0.047530016	0.327967314	0.280437298	0.479573799	0.876386455	0.756446752	0.054104056	0.925003338	FALSE
156	PF3D7_0211200.1o1_7850	0.194684213	-0.008663775	-0.203347988	0.57189999	0.812531736	0.690465268	-0.042370031	0.933789205	FALSE
157	PF3D7_0211300.iso1.exon2.amp1_77	-0.419809804	-0.359051759	0.060758046	0.829610756	0.379645468	0.577456979	0.02491673	0.980022573	FALSE
158	PF3D7_0211900.iso1.exon1.amp1_2450	-0.274378767	0.086792845	0.361171613	0.27547327	0.756698334	0.606163721	0.081182264	0.915060736	FALSE
159	PF3D7_0212200.iso1.exon2.amp1_4153	-0.695209034	0.084664577	0.779873612	0.012289252	0.599911279	0.448290343	0.222183056	0.553944093	FALSE
160	PF3D7_0212300.e3s1_4883	-0.46417148	-0.365928088	0.098243392	0.638345388	0.318162624	0.41993317	0.0494651	0.933789205	FALSE
161	PF3D7_0212400.3o3_6803	-0.530640737	-0.803143923	-0.272503186	0.02171521	0.495485568	0.151729388	-0.096657392	0.683842929	FALSE
162	PF3D7_0212500.iso1.exon1.amp1_3098	-0.831419282	-0.419023499	0.412395783	0.11493881	0.478319058	0.455075327	0.144459256	0.881162544	FALSE
163	PF3D7_0212700.1o1_4996	-0.322506972	-0.50392693	-0.181419958	0.431543497	0.772135479	0.392329116	-0.040880813	0.917134742	FALSE
164	PF3D7_0212900.1o1_9032	-0.831671054	-0.541130188	0.290540867	0.523417641	0.429402858	0.920598193	0.095321406	0.929542534	FALSE
165	PF3D7_0213000.1o1_4661	-0.765044084	-1.081503998	-0.316459914	0.220404233	0.484419272	0.473983591	-0.109138211	0.915060736	FALSE
166	PF3D7_0213400.iso1.exon2.amp1_388	-0.452829295	-0.648666473	-0.195837178	0.091599389	0.465252154	0.16429507	-0.07383683	0.874701525	FALSE
167	PF3D7_0213400.iso1.exon3.amp1_84	-0.454909634	-0.529229105	-0.074319471	0.512582208	0.449395295	0.174991328	-0.02896156	0.926395115	FALSE
168	PF3D7_0213500.iso1.exon3.amp1_4447	-0.440663479	-0.591581686	-0.150918207	0.573485567	0.689941778	0.50240966	-0.037447083	0.933789205	FALSE
169	PF3D7_0213900.iso1.exon1.amp2_1348	-0.640385479	-0.799597027	-0.159211548	0.210084718	0.503131685	0.188666545	-0.055454186	0.915060736	FALSE
170	PF3D7_0214100.e1s1_6246	0.006894983	0.69483028	0.687935297	0.167800562	0.635662144	0.907586127	0.170787307	0.914975982	FALSE
171	PF3D7_0214300.iso1.exon1.amp1_2559	-0.255973809	0.312686762	0.568660572	0.032908936	0.760468839	0.409028395	0.129862227	0.764497354	FALSE
172	PF3D7_0214300.iso1.exon1.amp2_2848	-0.566307471	-0.558611289	0.007696182	0.944973449	0.557254696	0.118877207	0.002434528	0.993515392	FALSE
173	PF3D7_0215700.e2s2_6920	0.321871493	0.595996216	0.274124724	0.552534488	0.732015441	0.917257618	0.060525518	0.933789205	FALSE
174	PF3D7_0216400.1o1_7065	-0.645996431	-0.633526547	0.012469884	0.973496478	0.489059492	0.771062352	0.003937052	0.998686155	FALSE
175	PF3D7_0216700.1.6o7_7390	-0.489914912	-0.529943211	-0.040028299	0.804931219	0.704034874	0.229315578	-0.009984751	0.975412922	FALSE
176	PF3D7_0216700.iso2.exon6.amp1_679	0.109297122	0.036054079	-0.073243042	0.756050512	0.992276549	0.34616693	-0.012950307	0.963667248	FALSE
177	PF3D7_0216900.1o1_7051	-0.211559972	0.143708774	0.355268746	0.548315421	0.534590647	1.20139873	0.091979831	0.933789205	FALSE
178	PF3D7_0217400.2o2_6962	0.22248597	0.84441364	0.62192767	0.353863181	0.732286996	1.311582802	0.126842648	0.915060736	FALSE
179	PF3D7_0217700.iso1.exon1.amp1_3848	-0.077461864	0.411824081	0.489285944	0.050311186	0.825590579	0.380557145	0.10340248	0.830402251	FALSE
180	PF3D7_0217900.e1s1_7766	0.224743486	0.478400367	0.253656881	0.255382158	0.921463089	0.321597947	0.048296136	0.915060736	FALSE
181	PF3D7_0218300.1o4_6226	-0.654875192	-0.806768394	-0.151893202	0.071758282	0.303287663	0.126483495	-0.08758673	0.862677656	FALSE
182	PF3D7_0218300.2o4_6804	-0.627881851	-0.905177621	-0.277295771	0.047282957	0.473973483	0.210193023	-0.102174047	0.830402251	FALSE
183	PF3D7_0218300.e2_6243	-0.459698955	-0.940735571	-0.481036616	0.000852407	0.735767193	0.069858724	-0.115509624	0.186041009	FALSE
184	PF3D7_0219300.1o1_5228	-0.191107503	-0.180654177	0.010453326	0.964870028	0.733012131	0.428333166	0.002468836	0.99796959	FALSE
185	PF3D7_0219400.iso1.exon2.amp1_1777	-1.399830531	-1.153705617	0.246124914	0.731341644	1.193506666	1.440146894	0.033531023	0.957663815	FALSE
186	PF3D7_0219600.e1s1_8817	-0.120535894	0.503321606	0.6238575	0.181209125	0.790985597	0.847461203	0.130384577	0.914975982	FALSE
187	PF3D7_0219700.2o2_6131	0.548254942	1.397181231	0.848926289	0.109526168	1.008758878	0.917394508	0.14162651	0.881162544	FALSE
188	PF3D7_0219900.2o2_6693	-0.111790791	0.819644427	0.931435218	0.26112139	0.807602261	1.581089483	0.16764133	0.915060736	FALSE
189	PF3D7_0220000.e2s1_7105	1.648177779	2.503097214	0.854919435	0.363832727	1.795552887	1.793382279	0.079365918	0.915060736	FALSE
190	PF3D7_0220000.e2s2_7394	0.781247776	2.255179046	1.47393127	0.103248344	1.499225116	1.563321357	0.163065524	0.881162544	FALSE
191	PF3D7_0220100.e2s1_7661	0.121755914	0.037036022	-0.084719892	0.830816084	0.815708433	0.782943368	-0.017386289	0.980022573	FALSE
192	PF3D7_0220600.2o2_6976	-0.043068741	-0.083388266	-0.040319524	0.923465226	0.977539818	0.814855011	-0.006993907	0.99230528	FALSE
193	PF3D7_0221400.iso1.exon2.amp1_3871	-0.356459515	-0.630319474	-0.273859959	0.503096638	0.988946694	0.770787827	-0.047194124	0.926395115	FALSE
194	PF3D7_0221600.1o1_5812	0.114533544	-0.00553236	-0.120065904	0.770248721	1.064030122	0.778423846	-0.019312063	0.966343362	FALSE
195	PF3D7_0222000.iso1.exon1.amp1_691	-0.624733649	-0.663842213	-0.039108564	0.901157656	0.601541237	0.628347257	-0.010781222	0.988992794	FALSE
196	PF3D7_0222100.iso1.exon1.amp1_3007	0.533759061	0.879121974	0.345362913	0.647068526	1.180010163	1.513846359	0.047118293	0.933789205	FALSE
197	PF3D7_0222500.iso1.exon2.amp1_987	0.273648445	0.37982134	0.106172895	0.855693884	0.874598024	1.187833664	0.019345363	0.984961268	FALSE
198	PF3D7_0222600.iso1.exon2.amp1_1008	0.036800626	0.650208051	0.613407426	0.488041363	1.072083259	1.76742876	0.087384924	0.926395115	FALSE
199	PF3D7_0222700.iso1.exon2.amp1_1289	-0.11821529	0.650956177	0.769171466	0.245240684	0.919535771	1.244828325	0.13337949	0.915060736	FALSE
200	PF3D7_0222800.iso1.exon2.amp1_1564	0.220330428	0.576831684	0.356501256	0.700690879	1.283026825	1.882082378	0.043603705	0.945022288	FALSE
201	PF3D7_0222900.1o1_4649	-0.014574672	0.461903784	0.476478455	0.30516107	0.83027213	0.878310921	0.095020571	0.915060736	FALSE
202	PF3D7_0223100.iso1.exon2.amp1_989	-0.222838919	0.004306409	0.227145328	0.62588371	0.796443437	0.927327554	0.046620964	0.933789205	FALSE
203	PF3D7_0223200.iso1.exon2.amp1_3607	-0.036910581	1.208546102	1.245456683	0.125105649	0.778901466	1.438311094	0.236687512	0.881162544	FALSE
204	PF3D7_0223300 (renamed)_6619	0.602658165	1.23141089	0.628752725	0.255375939	0.934890218	1.033864639	0.11072725	0.915060736	FALSE
205	PF3D7_0223300.iso1.exon2.amp1_3611	1.073527322	1.864498761	0.790971439	0.099688728	1.092793644	0.815394575	0.123719528	0.875552328	FALSE
206	PF3D7_0223400.iso1.exon2.amp1_1856	-0.376384072	0.032383171	0.408767242	0.513530025	0.644091722	1.260693895	0.092254115	0.926395115	FALSE
207	PF3D7_0223500.iso1.exon1.amp1_3027	-0.163631856	0.568879544	0.7325114	0.19814948	0.978162966	1.04117726	0.123898667	0.914975982	FALSE
208	PF3D7_0223500.iso1.exon2.amp1_4551	-0.465608371	-0.354376915	0.111231456	0.596396052	0.654800826	0.373122589	0.029437713	0.933789205	FALSE
209	PF3D7_0300100.iso1.exon2.amp1_138	1.175659597	2.441457506	1.265797908	0.050279325	1.209219843	1.045730369	0.17696111	0.830402251	FALSE
210	PF3D7_0300200.iso1.exon1.amp1_3012	0.49646535	1.414062131	0.917596781	0.237333494	1.107020848	1.454720608	0.13288642	0.915060736	FALSE
211	PF3D7_0300400.iso1.exon1.amp1_401	0.757540037	1.332076747	0.574536711	0.512540909	1.344843964	1.739291957	0.068682088	0.926395115	FALSE
212	PF3D7_0300500.iso1.exon1.amp1_134	-0.241517506	0.002152936	0.243670442	0.488850973	0.686691752	0.682490224	0.059181275	0.926395115	FALSE
213	PF3D7_0300700.iso1.exon2.amp1_3592	0.895928669	1.214846142	0.318917473	0.66875323	1.013248544	1.510572081	0.049221265	0.936894427	FALSE
214	PF3D7_0300800.iso1.exon2.amp1_1572	-0.614002829	0.064668788	0.678671617	0.391048328	0.571470243	1.571011078	0.150545522	0.915060736	FALSE
215	PF3D7_0300900.iso1.exon2.amp1_1555	-0.563743671	-0.219013484	0.344730187	0.265002663	0.359754969	0.588693936	0.146623374	0.915060736	FALSE
216	PF3D7_0301100.2o2_9008	-0.385231574	-0.767774481	-0.382542907	0.137430999	0.716878429	0.43498927	-0.092233568	0.897030738	FALSE
217	PF3D7_0301200.iso1.exon3.amp1_short_4317	-0.474161009	-0.701930999	-0.22776999	0.238258451	0.462012842	0.347642828	-0.084220678	0.915060736	FALSE
218	PF3D7_0301300.2o2_5567	-0.638370962	-0.558144128	0.080226834	0.794003396	0.644370264	0.604344647	0.020890884	0.970102624	FALSE
219	PF3D7_0301400.2o2_4671	-0.49974843	-0.462122359	0.037626071	0.872970117	0.583547894	0.451102412	0.010994974	0.985408067	FALSE
220	PF3D7_0301500.2o2_6419	-0.60540608	-0.550971803	0.054434277	0.759863782	0.422647489	0.343072738	0.021884314	0.963906695	FALSE
221	PF3D7_0301700.e1s1_8026	-0.324643038	-0.568990096	-0.244347057	0.530637735	0.709950912	0.764295074	-0.056862494	0.933789205	FALSE
222	PF3D7_0301700.e2s1_8045	0.134773584	0.518609131	0.383835548	0.378769825	0.957882974	0.820096426	0.067798639	0.915060736	FALSE
223	PF3D7_0301800.2o2_9014	-0.510581507	-0.495438782	0.015142724	0.949720302	0.878507979	0.398590553	0.003008613	0.99537408	FALSE
224	PF3D7_0301900.1o1_7888	-0.131352028	1.201499596	1.332851624	0.099076276	0.873836973	1.395639236	0.23478892	0.875552328	FALSE
225	PF3D7_0302000.iso1.exon2.amp1_158	-0.299768289	0.18987497	0.489643259	0.221093271	0.513405266	0.747309658	0.149908392	0.915060736	FALSE
226	PF3D7_0302200.1o9_6523	0.039239154	1.037682359	0.998443204	0.13897832	0.627424773	1.208841265	0.232495753	0.89791523	FALSE
227	PF3D7_0302200.9o9_6812	-0.32993589	-0.486710286	-0.156774396	0.285721791	0.357261923	0.266972146	-0.075000074	0.915060736	FALSE
228	PF3D7_0302200.e1_5952	0.578828961	1.799293231	1.22046427	0.11513954	0.8283949	1.3594409	0.225271723	0.881162544	FALSE
229	PF3D7_0302200.e2_6826	-0.529706996	-0.561192741	-0.031485745	0.808798858	0.26122116	0.257523084	-0.020120267	0.976058475	FALSE
230	PF3D7_0302200.e8_5663	-0.768206177	-0.827048481	-0.058842303	0.605342805	0.398521072	0.192094333	-0.025730409	0.933789205	FALSE
231	PF3D7_0302200.e9_5390	-0.387677744	-0.376049505	0.011628239	0.94762475	0.535414228	0.321862483	0.003755391	0.995183445	FALSE
232	PF3D7_0302500.e1s1_7185	0.905048094	1.454430667	0.549382573	0.332411545	1.034570957	1.076628242	0.088099001	0.915060736	FALSE
233	PF3D7_0302500.e6s1_5136	-0.640910856	-0.884469186	-0.24355833	0.133570906	0.528973102	0.262320757	-0.080171458	0.893405987	FALSE
234	PF3D7_0302500.e9s1_6314	0.104854287	0.419584139	0.314729852	0.405907963	0.61177138	0.736400318	0.083681085	0.915831356	FALSE
235	PF3D7_0302800.e1s1_6041	0.202418504	0.260754741	0.058336237	0.902380017	0.850375182	0.955505508	0.01127023	0.988992794	FALSE
236	PF3D7_0302900.e1s1_5473	-0.355625251	-0.404944082	-0.04931883	0.777125774	0.818302667	0.217026505	-0.010607741	0.968471409	FALSE
237	PF3D7_0302900.e1s2_5184	-0.346965968	-0.176729435	0.170236534	0.806680847	1.125993725	1.405549198	0.024451133	0.975839887	FALSE
238	PF3D7_0303200.e2s1_6620	-0.589871324	-0.341717774	0.248153551	0.495358068	0.415893023	0.729390258	0.089644059	0.926395115	FALSE
239	PF3D7_0303700.e1s1_6024	0.152884926	1.06745724	0.914572315	0.099636793	0.849064404	0.958041163	0.176861484	0.875552328	FALSE
240	PF3D7_0303800.1o1_7036	-0.637264895	0.385516664	1.022781559	0.111412628	0.353818789	1.123686438	0.339858456	0.881162544	FALSE
241	PF3D7_0304000.e4s1_5769	-0.032590696	0.198150027	0.230740723	0.654690554	0.916961322	1.025713505	0.041365914	0.933789205	FALSE
242	PF3D7_0304100.1o1_7041	-0.510076926	-0.32292041	0.187156516	0.593386049	0.353658236	0.713339536	0.076166868	0.933789205	FALSE
243	PF3D7_0304200.e1s1_8348	-0.140847816	0.005359316	0.146207132	0.733030759	0.477202464	0.879512678	0.045377765	0.957663815	FALSE
244	PF3D7_0304600_7131	-0.160603777	0.374124438	0.534728215	0.003387786	0.566092377	0.244666781	0.165066417	0.337549502	FALSE
245	PF3D7_0305100.e1s3_8820	-0.802739344	-0.637468296	0.165271048	0.628240629	0.637261225	0.674103177	0.042941424	0.933789205	FALSE
246	PF3D7_0305200.iso1.exon1.amp1_3725	-0.400474754	-0.58747099	-0.186996236	0.647045352	0.726839496	0.8114274	-0.042303897	0.933789205	FALSE
247	PF3D7_0305200.iso1.exon1.amp2_4239	-0.259607663	-0.272767864	-0.013160201	0.977978987	0.800477315	0.96397601	-0.002674007	0.998822427	FALSE
248	PF3D7_0305500.e1s3_9107	-0.315486217	-0.579920902	-0.264434685	0.501731749	0.992214103	0.735922885	-0.04557189	0.926395115	FALSE
249	PF3D7_0305600.1o1_7038	-0.103719418	-0.277092292	-0.173372874	0.548017375	0.720250867	0.543099513	-0.041116198	0.933789205	FALSE
250	PF3D7_0306200.5o5_6140	0.091334346	0.548502054	0.457167708	0.512117553	0.992459858	1.388284461	0.072991825	0.926395115	FALSE
251	PF3D7_0307300.1o1_7034	-0.520697171	-0.036951648	0.483745523	0.469801015	0.25337883	1.354135943	0.15787142	0.921428022	FALSE
252	PF3D7_0307500.iso1.exon4.amp1_417	0.349753473	1.326694747	0.976941274	0.206453071	1.072204943	1.431897693	0.145651166	0.914975982	FALSE
253	PF3D7_0307700.e3s2_7088	-0.064938486	0.175922204	0.24086069	0.668588581	0.75176137	1.141192459	0.04990506	0.936894427	FALSE
254	PF3D7_0308000.1o1_8767	0.130195512	0.235626971	0.105431459	0.878943863	0.873205107	1.422149155	0.018496855	0.985408067	FALSE
255	PF3D7_0308100.iso1.exon1.amp2_3062	-0.650192495	-0.355146311	0.295046184	0.307714378	0.391527658	0.55525762	0.11908405	0.915060736	FALSE
256	PF3D7_0308300.e1s1_6328	-0.594633685	-0.548199527	0.046434158	0.748258453	0.56391735	0.228566151	0.014408975	0.962376195	FALSE
257	PF3D7_0308700.iso1.exon1.amp1_2745	0.713193776	0.287430879	-0.425762898	0.520775119	1.404937302	1.277696475	-0.051000287	0.92766636	FALSE
258	PF3D7_0308900.iso1.exon1.amp2_1908	-0.736222393	-0.726807059	0.009415335	0.977081528	0.310853653	0.680689184	0.004233798	0.998822427	FALSE
259	PF3D7_0309000.iso1.exon1.amp1_144	-0.04293507	0.464906308	0.507841378	0.123686577	0.579532896	0.578442437	0.146079566	0.881162544	FALSE
260	PF3D7_0309100.iso1.exon5.amp1_2930	-0.341742542	-0.353750053	-0.012007512	0.957233941	0.36362939	0.453868147	-0.005340509	0.99537408	FALSE
261	PF3D7_0309200.iso1.exon3.amp2_2542	-0.5677629	-0.593957849	-0.026194949	0.899454848	0.32323909	0.421138582	-0.013011712	0.988767131	FALSE
262	PF3D7_0309600.e1s1_5717	-0.718783099	-0.35070055	0.368082548	0.53287835	0.568644101	1.194246526	0.091870624	0.933789205	FALSE
263	PF3D7_0309900.iso1.exon2.amp1_655	-0.556437023	-0.648414996	-0.091977972	0.549306071	0.324918322	0.29695331	-0.047617838	0.933789205	FALSE
264	PF3D7_0310200.e1s3_7089	-0.692527449	-0.161168537	0.531358911	0.242727637	0.786012844	0.846032236	0.111690179	0.915060736	FALSE
265	PF3D7_0310300.e1s1_6333	-0.388625708	-0.379417586	0.009208122	0.940345857	0.48031428	0.194805899	0.003354679	0.992371014	FALSE
266	PF3D7_0310300.e1s2_6327	-0.008105008	0.578743016	0.586848024	0.234745719	0.756984495	0.921695638	0.125877104	0.915060736	FALSE
267	PF3D7_0310500.e1s1_7495	-0.484551499	-0.324229154	0.160322345	0.610984658	0.690632386	0.60969405	0.03917293	0.933789205	FALSE
268	PF3D7_0310500.e1s2_7206	0.59614091	0.345205337	-0.250935572	0.583924243	1.326514724	0.833787575	-0.032644326	0.933789205	FALSE
269	PF3D7_0310500.e1s3_8946	-0.444487844	0.420342759	0.864830603	0.141991595	0.629574566	1.056458759	0.208844667	0.904378076	FALSE
270	PF3D7_0310700.2o2_7252	-0.748998177	-0.502213729	0.246784448	0.21608666	0.665228473	0.328155457	0.064604876	0.915060736	FALSE
271	PF3D7_0310800.1o1_6383	-0.899492773	-0.995911215	-0.096418442	0.541053825	0.417339284	0.292965982	-0.039638374	0.933789205	FALSE
272	PF3D7_0310800_9158	-0.096158918	-0.034847384	0.061311534	0.884584578	1.049622103	0.809472527	0.009962365	0.985408067	FALSE
273	PF3D7_0311100.iso1.exon3.amp1_1794	0.047928634	-0.461713758	-0.509642393	0.048543432	1.039034246	0.354025029	-0.086085928	0.830402251	FALSE
274	PF3D7_0311400.iso1.exon1.amp1_2120	-0.152525801	-0.405733207	-0.253207405	0.397011433	0.852706722	0.53602391	-0.051242738	0.915060736	FALSE
275	PF3D7_0311400.iso1.exon2.amp1_782	0.508149004	0.679512073	0.171363069	0.735967051	1.182027227	0.981450684	0.024590334	0.958555259	FALSE
276	PF3D7_0311400.iso1.exon2.amp2_1071	0.242894537	-0.399318221	-0.642212759	0.077910747	1.051584296	0.588825663	-0.105903909	0.862677656	FALSE
277	PF3D7_0311600.2o5_9087	-0.527341622	-0.67798323	-0.150641608	0.510892284	0.518259154	0.437030965	-0.049241523	0.926395115	FALSE
278	PF3D7_0311700.1o15_9041	-0.214459443	-0.04805578	0.166403663	0.532047568	0.469598421	0.523863223	0.058272731	0.933789205	FALSE
279	PF3D7_0311800.e3_7124	-0.374581155	-0.386977469	-0.012396314	0.938953527	0.412320998	0.308811719	-0.005137672	0.992371014	FALSE
280	PF3D7_0311900.1o1_5052	-0.593427751	-0.785478902	-0.192051152	0.170951079	0.582812395	0.197645893	-0.057838062	0.914975982	FALSE
281	PF3D7_0312200.iso1.exon1.amp1_3720	-0.666861589	-0.915358424	-0.248496835	0.141055405	0.823400958	0.180425438	-0.053190628	0.904378076	FALSE
282	PF3D7_0312300.1o1_7872	-0.641805889	-0.199117989	0.4426879	0.450775322	0.600268121	1.171985898	0.107290296	0.920899767	FALSE
283	PF3D7_0312400.2o7_8753	0.676423551	0.752010134	0.075586583	0.898687516	0.9628215	1.202499964	0.012695323	0.988767131	FALSE
284	PF3D7_0313000.1o2_7579	-0.184907233	-0.213534564	-0.028627331	0.928105048	0.982687121	0.571807753	-0.005044166	0.99230528	FALSE
285	PF3D7_0313100.1o4_8505	-0.191209743	-0.751301997	-0.560092254	0.031094065	0.87429103	0.383034997	-0.111912906	0.764497354	FALSE
286	PF3D7_0313200.1o1_9000	-0.161134982	-0.290791433	-0.129656452	0.738406566	0.678857282	0.777080866	-0.031297056	0.95902745	FALSE
287	PF3D7_0313300.iso1.exon5.amp1_931	-0.515868214	-0.797094939	-0.281226726	0.206861973	0.625827012	0.385656845	-0.077617001	0.914975982	FALSE
288	PF3D7_0313400.iso1.exon1.amp1_445	-0.517651566	-0.110336407	0.407315159	0.307363999	0.8048379	0.746858109	0.085005702	0.915060736	FALSE
289	PF3D7_0313600.5o6_7614	-0.535875934	-0.398993387	0.136882547	0.59448881	0.715137908	0.473657766	0.032945111	0.933789205	FALSE
290	PF3D7_0313700.iso1.exon2.amp1_2360	-0.210706499	-0.085824475	0.124882025	0.726976799	0.615068285	0.716499314	0.033187759	0.957663815	FALSE
291	PF3D7_0313800.5o5_7343	-0.070491481	-0.295092694	-0.224601213	0.425512039	0.836196227	0.501412236	-0.046449618	0.917134742	FALSE
292	PF3D7_0315100.e1s1_7183	-0.754557006	-0.431497406	0.3230596	0.606164618	0.807766155	1.266353495	0.061836909	0.933789205	FALSE
293	PF3D7_0315200.iso1.exon1.amp3_2789	-0.291569085	-0.264020056	0.027549029	0.876669296	0.425178385	0.342636417	0.011015689	0.985408067	FALSE
294	PF3D7_0315400.1o1_8147	1.370218237	1.125061262	-0.245156975	0.379474778	0.938421221	0.470551037	-0.045472813	0.915060736	FALSE
295	PF3D7_0315900.2o2_5837	-0.350067356	-0.542656358	-0.192589002	0.293727096	0.598320679	0.309475501	-0.055973104	0.915060736	FALSE
296	PF3D7_0316300.1.e3_6827	-0.549577473	-0.1789754	0.370602073	0.453463642	1.096470817	0.939097783	0.057185439	0.920899767	FALSE
297	PF3D7_0316500.e1s1_5735	0.388291538	0.423320466	0.035028928	0.894381444	0.712349737	0.496159934	0.00844062	0.987948059	FALSE
298	PF3D7_0317200.iso1.exon1.amp1_4590	-0.590160718	-0.530192249	0.05996847	0.640571114	0.403708231	0.228079009	0.025750467	0.933789205	FALSE
299	PF3D7_0317200.iso1.exon1.amp2_3936	-0.511593877	-0.500496041	0.011097837	0.927089604	0.460504114	0.196164959	0.00421269	0.99230528	FALSE
300	PF3D7_0317300.s2_8011	-0.160770822	-0.286300814	-0.125529992	0.762178259	0.744146122	0.829324802	-0.027744413	0.964416895	FALSE
301	PF3D7_0317300.s3_7150	0.802081357	1.249488446	0.447407089	0.003799816	0.624912438	0.18842446	0.125850479	0.355156171	FALSE
302	PF3D7_0317400.iso1.exon1.amp1_643	-0.39285373	-0.02988562	0.36296811	0.357273352	0.374500048	0.773848535	0.138346362	0.915060736	FALSE
303	PF3D7_0317400.iso1.exon2.amp1_3902	-0.465491532	-0.221762718	0.243728813	0.642138076	0.768701244	1.056419579	0.050413888	0.933789205	FALSE
304	PF3D7_0317500.iso1.exon1.amp1_3396	0.031878459	0.221459635	0.189581177	0.669132818	0.96599169	0.862547415	0.033083942	0.936894427	FALSE
305	PF3D7_0317500.iso1.exon2.amp1_942	-0.281027626	-0.529215143	-0.248187518	0.05375242	0.496476231	0.182661736	-0.087632061	0.830402251	FALSE
306	PF3D7_0317700.e1s1_8247	-0.563759717	-0.744893521	-0.181133804	0.471142666	0.741016366	0.450371552	-0.042246894	0.921428022	FALSE
307	PF3D7_0317700.e9s1_9185	-0.273298842	-0.582832671	-0.309533829	0.159815308	0.621108489	0.374556457	-0.086161328	0.914975982	FALSE
308	PF3D7_0317800.1o1_7265	-0.864356872	-0.339727399	0.524629473	0.096166163	0.645594851	0.53747162	0.137808337	0.875552328	FALSE
309	PF3D7_0318200.e1s1_8532	-0.973898701	-0.20278065	0.771118051	0.093037839	0.568640376	0.787622996	0.215293155	0.874701525	FALSE
310	PF3D7_0318200.e1s2_8534	-0.391954622	-0.508249291	-0.116294669	0.720183106	0.771897572	0.62405823	-0.025607726	0.95750546	FALSE
311	PF3D7_0318200.e1s3_5066	0.389734291	1.451309967	1.061575676	0.002650006	0.963697173	0.470328555	0.191895374	0.31337836	FALSE
312	PF3D7_0318500.iso1.exon1.amp3_2251	0.095652949	0.21163629	0.115983341	0.839683401	0.903246205	1.161994065	0.020662532	0.981270492	FALSE
313	PF3D7_0318500.iso1.exon1.amp4_222	-0.491844606	-0.578296382	-0.086451776	0.527884724	0.510692129	0.22123306	-0.029580448	0.933789205	FALSE
314	PF3D7_0318500.iso1.exon1.amp5_162	-0.531649061	0.083396334	0.615045395	0.107476254	0.359925621	0.665755148	0.252816136	0.881162544	FALSE
315	PF3D7_0318600.iso1.exon1.amp1_836	-0.461334286	0.199459963	0.660794248	0.219927061	0.823963395	0.999639797	0.130289776	0.915060736	FALSE
316	PF3D7_0318600.iso1.exon1.amp2_200	-0.493833911	-0.502295994	-0.008462083	0.979112131	0.60489541	0.646915528	-0.002313154	0.998822427	FALSE
317	PF3D7_0319000.iso1.exon1.amp1_3432	-0.383825359	-0.107480636	0.276344723	0.567038557	0.828437771	0.955415137	0.054603383	0.933789205	FALSE
318	PF3D7_0319100.1o1_7545	-0.678592539	-0.554013656	0.124578883	0.647761395	0.465212371	0.543751083	0.043750465	0.933789205	FALSE
319	PF3D7_0319700.e1s1_5124	-0.077312747	-0.206153936	-0.128841188	0.788524	0.757439722	0.971624128	-0.027385083	0.969245152	FALSE
320	PF3D7_0319900.1o1_4676	-0.015875613	0.06070503	0.076580643	0.845691579	0.638102394	0.795976788	0.019411528	0.981270492	FALSE
321	PF3D7_0320200.iso1.exon1.amp1_3627	-0.044195762	0.376477734	0.420673496	0.473696384	0.963497024	1.152917	0.071083123	0.921752019	FALSE
322	PF3D7_0320400.e1s3_6638	-0.63469133	-0.426282115	0.208409216	0.092942177	0.575896201	0.145835623	0.063718279	0.874701525	FALSE
323	PF3D7_0320500.1o1_8174	0.133160819	-0.029756724	-0.162917543	0.809339743	0.843857127	1.38468026	-0.029520834	0.976058475	FALSE
324	PF3D7_0320800.e1s1_8898	-0.297824979	0.091566873	0.389391853	0.585250578	0.683360232	1.452674543	0.080523615	0.933789205	FALSE
325	PF3D7_0320800.e2s1_4867	-0.351800929	-0.555773313	-0.203972384	0.141508675	0.476523435	0.220233626	-0.074677603	0.904378076	FALSE
326	PF3D7_0321500.iso1.exon1.amp1_841	-0.601931502	-0.732851472	-0.130919969	0.287473764	0.336814808	0.218813934	-0.066969294	0.915060736	FALSE
327	PF3D7_0321600.e1_7117	-0.655194905	-0.440814145	0.21438076	0.543782257	0.529977522	0.703579224	0.064732065	0.933789205	FALSE
328	PF3D7_0321800.iso1.exon1.amp1_234	-0.255163797	-0.484494993	-0.229331196	0.165484578	0.648401486	0.244835926	-0.061973795	0.914975982	FALSE
329	PF3D7_0322100.1o1_9067	-0.076692318	-0.024684715	0.052007603	0.915390481	0.718779632	0.998562252	0.011480646	0.991159216	FALSE
330	PF3D7_0322900.e2_5953	-0.47392269	0.00443326	0.478355949	0.205914843	0.307509202	0.706389491	0.213459774	0.914975982	FALSE
331	PF3D7_0323300.1o1_6145	-0.612165262	-0.659887102	-0.04772184	0.791721313	0.738447682	0.273967576	-0.011327083	0.969245152	FALSE
332	PF3D7_0323600.e1_5672	-0.481197043	-0.593721141	-0.112524099	0.622181365	0.738892645	0.400353734	-0.026440107	0.933789205	FALSE
333	PF3D7_0323800.e2s1_7381	-0.144240691	-0.357336289	-0.213095598	0.700368031	0.975772159	1.10520659	-0.035838879	0.945022288	FALSE
334	PF3D7_0324100.2o2_5248	-0.156017683	0.221403517	0.3774212	0.457166953	0.826538887	0.99490554	0.074274969	0.920899767	FALSE
335	PF3D7_0324400.iso1.exon2.amp1_1578	0.008910724	0.030871934	0.021961209	0.968139232	1.061771624	1.096722231	0.003434514	0.998686155	FALSE
336	PF3D7_0324600.iso1.exon2.amp1_3003	0.48544735	1.30978735	0.82434	0.363956155	1.39787154	1.756416647	0.095269548	0.915060736	FALSE
337	PF3D7_0324800.iso1.exon2.amp1_2158	0.237496791	0.542974334	0.305477543	0.682058688	1.010780143	1.512884417	0.047221213	0.93820426	FALSE
338	PF3D7_0324900.iso1.exon1.amp1_2456	0.708247767	1.618323647	0.910075881	0.189172331	1.151426093	1.26480377	0.13024504	0.914975982	FALSE
339	PF3D7_0324900.iso1.exon2.amp1_2239	-0.197579907	0.382524195	0.580104102	0.269347111	0.481601312	1.005638227	0.17130704	0.915060736	FALSE
340	PF3D7_0400100.iso1.exon1.amp1_3682	-0.622775577	0.352256928	0.975032505	0.30523819	0.527241637	1.850943535	0.205102135	0.915060736	FALSE
341	PF3D7_0400100.iso1.exon1.amp2_3971	-0.540229667	0.18393727	0.724166936	0.435949651	0.634469081	1.863146893	0.139971518	0.917134742	FALSE
342	PF3D7_0400100.iso1.exon1.amp3_4260	-0.533092146	-0.661418056	-0.12832591	0.513156473	0.552457273	0.357856133	-0.040025828	0.926395115	FALSE
343	PF3D7_0400100.iso1.exon2.amp1_4192	0.080786965	1.050834731	0.970047766	0.285052647	1.165902536	1.733637112	0.130186634	0.915060736	FALSE
344	PF3D7_0400200.iso1.exon1.amp1_1876	0.992249588	2.049266643	1.057017056	0.18729533	1.269363526	1.464530994	0.13630084	0.914975982	FALSE
345	PF3D7_0400300.iso1.exon1.amp1_2731	-0.281497591	0.066555751	0.348053342	0.568521016	0.886806531	1.221697134	0.06237575	0.933789205	FALSE
346	PF3D7_0400400.iso1.exon1.amp1_1294	0.832511428	0.842589444	0.010078016	0.983220067	1.073150725	0.93694199	0.001586267	0.998822427	FALSE
347	PF3D7_0400500.iso1.exon2.amp1_998	0.021856252	0.671816292	0.64996004	0.413831062	0.946605273	1.570959156	0.104688539	0.917134742	FALSE
348	PF3D7_0400700.iso1.exon1.amp1_992	-0.101315713	0.210263038	0.31157875	0.652425236	0.893355983	1.403573186	0.053897979	0.933789205	FALSE
349	PF3D7_0400800.iso1.exon1.amp1_3008	1.005243447	1.757877756	0.752634309	0.394631973	1.345821325	1.721867796	0.090073639	0.915060736	FALSE
350	PF3D7_0400900.iso1.exon1.amp1_1573	0.119807391	0.356305937	0.236498546	0.661112144	0.851762548	1.083152782	0.04476694	0.935901032	FALSE
351	PF3D7_0401000.iso1.exon1.amp1_2432	1.497172044	2.608704428	1.111532384	0.176819404	1.152866538	1.501797495	0.154808889	0.914975982	FALSE
352	PF3D7_0401200.iso1.exon2.amp1_2164	0.104816019	0.882377335	0.777561315	0.226717635	0.793623999	1.205231823	0.15259452	0.915060736	FALSE
353	PF3D7_0401300.iso1.exon2.amp1_3599	-0.136920043	0.33339103	0.470311073	0.311195725	0.639052498	0.891762856	0.116672033	0.915060736	FALSE
354	PF3D7_0401400.iso1.exon2.amp1_1862	0.134893611	0.488737866	0.353844254	0.539747639	0.751765845	1.157455986	0.073080124	0.933789205	FALSE
355	PF3D7_0401600.iso2.exon3.amp1_3896	-0.423104765	-0.600054962	-0.176950197	0.356580377	0.668717465	0.317398981	-0.046132076	0.915060736	FALSE
356	PF3D7_0401900.1o1_7666	0.300255898	0.791304239	0.491048341	0.246316166	1.356788471	0.712789482	0.0629031	0.915060736	FALSE
357	PF3D7_0402000 (renamed)_9038	-0.231193635	0.219094394	0.450288028	0.280835815	0.743997799	0.784267658	0.100253925	0.915060736	FALSE
358	PF3D7_0402000.e1s1_9149	-0.41772904	-0.688199698	-0.270470658	0.035312501	0.35364221	0.198966949	-0.13260339	0.784297925	FALSE
359	PF3D7_0402100.e2s1_6909	-0.402878143	-0.15616716	0.246710983	0.368910278	0.373667888	0.534832606	0.104140394	0.915060736	FALSE
360	PF3D7_0402200 (renamed)_8951	-0.281488402	0.829624079	1.111112481	0.241146662	1.176435041	1.786062876	0.147108434	0.915060736	FALSE
361	PF3D7_0402400.2o2_4672	0.209752698	1.619235149	1.409482451	0.122456433	1.075882863	1.610896093	0.204680111	0.881162544	FALSE
362	PF3D7_0402600.iso1.exon1.amp1_4449	0.138463134	0.575273524	0.43681039	0.5557079	0.979446143	1.488780071	0.069445357	0.933789205	FALSE
363	PF3D7_0403500.1o1_6443	-0.498134236	-0.296076862	0.202057374	0.714507517	0.85437554	1.114523919	0.037964015	0.951771533	FALSE
364	PF3D7_0403900.iso1.exon1.amp1_1235	-0.46699335	-0.586429011	-0.119435661	0.227314305	0.367723568	0.154319538	-0.05679486	0.915060736	FALSE
365	PF3D7_0404100.iso1.exon1.amp1_2815	-0.669259851	-0.600779187	0.068480664	0.881302931	0.595917296	0.941018359	0.017737403	0.985408067	FALSE
366	PF3D7_0404100.iso1.exon2.amp1_674	-0.351227265	-0.380853804	-0.029626539	0.790878324	0.376499626	0.193686007	-0.013685927	0.969245152	FALSE
367	PF3D7_0404200.iso1.exon2.amp1_2698	-0.64012354	-0.789089664	-0.148966124	0.302671857	0.437242142	0.250863734	-0.059024786	0.915060736	FALSE
368	PF3D7_0404600.s3_7434	1.185794859	1.777612484	0.591817625	0.245442548	1.204343894	0.920695236	0.083859392	0.915060736	FALSE
369	PF3D7_0404600.s5_7440	0.230043772	0.116530982	-0.11351279	0.814323685	0.983991161	0.955111853	-0.019288671	0.978189367	FALSE
370	PF3D7_0404700.1o2_6213	-0.229603432	-0.160214714	0.069388719	0.848279012	0.689384495	0.72325461	0.016682477	0.981270492	FALSE
371	PF3D7_0404800.1o2_6179	-0.576560326	-0.73833362	-0.161773294	0.432552793	0.717837806	0.343964732	-0.039279061	0.917134742	FALSE
372	PF3D7_0404800.e1_7407	-0.536723632	-0.642814845	-0.106091213	0.662751026	0.758324144	0.433869375	-0.02424048	0.935901032	FALSE
373	PF3D7_0405300.iso1.exon1.amp1_1116	0.565979658	1.313976565	0.747996906	0.305185313	1.045756444	1.396153208	0.114344837	0.915060736	FALSE
374	PF3D7_0405300.iso1.exon1.amp2_3940	-0.075855075	0.036607912	0.112462987	0.8270325	0.857257742	1.03835208	0.021318625	0.979720799	FALSE
375	PF3D7_0405400.e2s1_6356	-0.150775879	-0.18172253	-0.030946651	0.889346073	0.700396962	0.398118456	-0.007657674	0.986424105	FALSE
376	PF3D7_0405400.e2s4_7512	-0.539711368	0.386624536	0.926335904	0.178190964	0.509612411	1.266907679	0.241354673	0.914975982	FALSE
377	PF3D7_0405600.2o9_6125	-0.534485435	-0.42403397	0.110451465	0.50955259	0.498837031	0.3002148	0.038284463	0.926395115	FALSE
378	PF3D7_0405700.iso1.exon1.amp1_1975	-0.069955354	-0.257251852	-0.187296498	0.673995901	0.782258345	0.887330644	-0.039284318	0.936977941	FALSE
379	PF3D7_0405700.iso1.exon1.amp3_181	-0.468794791	-0.415621017	0.053173774	0.828482503	0.382170374	0.497665627	0.022341885	0.980022573	FALSE
380	PF3D7_0405900.e3s1_6875	-0.177182562	-0.371966763	-0.1947842	0.298792096	0.578968243	0.322999202	-0.058349362	0.915060736	FALSE
381	PF3D7_0406200_8002	0.258366646	1.192594773	0.934228127	0.281162242	1.1950481	1.650201942	0.124185539	0.915060736	FALSE
382	PF3D7_0406500.iso1.exon2.amp4_169	-0.166218205	-0.024414477	0.141803729	0.748460628	0.99958978	0.858599098	0.023995779	0.962376195	FALSE
383	PF3D7_0406700.iso1.exon9.amp1_3850	-0.487956991	-0.555635896	-0.067678906	0.760969395	0.476498015	0.435740292	-0.023890673	0.964192581	FALSE
384	PF3D7_0406800.iso1.exon3.amp1_3542	-0.313038524	-0.223633225	0.089405299	0.52836453	0.299210175	0.273630534	0.050259829	0.933789205	FALSE
385	PF3D7_0406900.4o8_8241	-0.234702005	-0.739202508	-0.504500503	0.00107566	0.626235659	0.177894013	-0.141699871	0.215439407	FALSE
386	PF3D7_0407000.1o1_5004	-0.632830798	-0.553230311	0.079600487	0.785631343	0.747468516	0.556107635	0.018206247	0.969245152	FALSE
387	PF3D7_0407200.iso1.exon5.amp1_341	-0.256506024	-0.03248423	0.224021793	0.74075391	0.5748069	1.399457504	0.052215673	0.960360308	FALSE
388	PF3D7_0407700.e2s1_5470	-0.738570745	-1.009034026	-0.270463281	0.038567238	0.600056435	0.150771396	-0.079365968	0.801055824	FALSE
389	PF3D7_0407700.e2s2_6343	0.802530304	0.866667312	0.064137008	0.868059264	1.206808996	0.692781373	0.009207241	0.985408067	FALSE
390	PF3D7_0408000.iso1.exon1.amp1_683	-0.625058013	-0.340281052	0.284776961	0.438031069	0.369778552	0.731793784	0.111547402	0.917178677	FALSE
391	PF3D7_0408600_7148	-0.49411293	-0.530951235	-0.036838305	0.912738083	0.901535853	0.633396729	-0.007010362	0.991159216	FALSE
392	PF3D7_0408700.e3s1_8902	-0.088567054	-0.034535586	0.054031468	0.824713804	0.728959771	0.444525106	0.012808613	0.979585743	FALSE
393	PF3D7_0408700.e5s1_7160	-0.863375643	-0.398511266	0.464864377	0.279076599	0.604740827	0.816391821	0.122635663	0.915060736	FALSE
394	PF3D7_0408700.e6s1_5713	-0.540055606	-0.517562726	0.022492881	0.838810874	0.348442254	0.197672751	0.011188574	0.981270492	FALSE
395	PF3D7_0408900.1.e3s1_7464	-0.401855704	-0.63899016	-0.237134456	0.072068257	0.330820988	0.216426197	-0.123455263	0.862677656	FALSE
396	PF3D7_0409200.iso1.exon1.amp1_3910	-0.849731973	-0.971531672	-0.121799699	0.396046435	0.504482357	0.237364752	-0.042101527	0.915060736	FALSE
397	PF3D7_0409500.2o2_7867	-0.120419062	-0.407557884	-0.287138822	0.042506234	0.623172324	0.175158859	-0.081054075	0.813959796	FALSE
398	PF3D7_0409600.iso1.exon1.amp1_551	-0.078293466	-0.083348821	-0.005055356	0.973359912	0.798489274	0.12798097	-0.001117407	0.998686155	FALSE
399	PF3D7_0409600.iso1.exon1.amp2_1059	-0.1765601	-0.159382119	0.017177981	0.933094371	0.664485028	0.361766237	0.004487577	0.992371014	FALSE
400	PF3D7_0409900.7o7_7316	-0.506977071	-0.674857979	-0.167880907	0.125902906	0.354247805	0.177182235	-0.082495989	0.881162544	FALSE
401	PF3D7_0410300.1o2_7946	0.061068736	1.073453948	1.012385211	0.10056322	0.862399451	1.065410403	0.190172204	0.875552328	FALSE
402	PF3D7_0410500.iso1.exon1.amp1_4441	-0.576340286	-0.468822676	0.10751761	0.664209363	0.864035708	0.419807666	0.021679934	0.935901032	FALSE
403	PF3D7_0410800.iso1.exon1.amp2_1340	0.127731876	0.329793566	0.20206169	0.725101739	1.01176084	1.148593272	0.032764	0.957663815	FALSE
404	PF3D7_0410900.1o1_6799	0.688700801	0.608280429	-0.080420371	0.720704679	0.954301376	0.326971172	-0.014789116	0.95750546	FALSE
405	PF3D7_0411000.iso1.exon1.amp1_3723	-0.217104314	-0.163144883	0.053959431	0.857002825	0.734044579	0.575167576	0.012523144	0.985254581	FALSE
406	PF3D7_0411700.1o1_4939	-0.394607108	0.449747151	0.844354259	0.12995824	0.601773754	0.991002747	0.214351731	0.884473071	FALSE
407	PF3D7_0411900.iso1.exon1.amp1_724	-0.702840628	-0.633619418	0.06922121	0.691219806	0.394950911	0.337227107	0.029660777	0.942793383	FALSE
408	PF3D7_0411900.iso1.exon2.amp2_seg2_2021	-0.884450263	-1.19799837	-0.313548107	0.023546605	0.706991171	0.110025548	-0.07828144	0.70239021	FALSE
409	PF3D7_0412000.1o1_7937	-0.179177734	-0.22461205	-0.045434316	0.954916396	1.044352807	1.650979973	-0.006713207	0.99537408	FALSE
410	PF3D7_0412400.iso1.exon1.amp1_3330	-0.199177557	0.586781129	0.785958686	0.157466331	1.117797381	0.987945844	0.118639876	0.914975982	FALSE
411	PF3D7_0412400.iso1.exon2.amp2_3106	-0.820377054	-0.462008695	0.358368359	0.433306359	0.457167694	0.910866188	0.113287614	0.917134742	FALSE
412	PF3D7_0412700.iso1.exon1.amp1_2752	0.385385444	1.239197665	0.853812221	0.27593302	1.032847396	1.491774929	0.13014715	0.915060736	FALSE
413	PF3D7_0412700.iso1.exon2.amp2_1081	-0.408000188	0.319034238	0.727034426	0.331440442	0.461361193	1.467086803	0.185141094	0.915060736	FALSE
414	PF3D7_0412900.iso1.exon1.amp1_435	1.111235271	2.831059531	1.71982426	1.39E-06	1.109336275	0.355916872	0.27231379	0.002065388	TRUE
415	PF3D7_0412900.iso1.exon2.amp2_3385	-1.337315425	-0.039240498	1.298074927	0.115858567	1.328594914	1.442901178	0.161238335	0.881162544	FALSE
416	PF3D7_0413200.iso1.exon1.amp1_2147	-0.320433328	0.456123117	0.776556446	0.030834524	0.832896177	0.558053288	0.160380495	0.764497354	FALSE
417	PF3D7_0413300.iso1.exon2.amp1_707	-0.186347498	0.016830858	0.203178356	0.590136478	0.65447639	0.747508736	0.050887007	0.933789205	FALSE
418	PF3D7_0414000.e2s1_8062	-0.301493003	-0.351830953	-0.050337949	0.768752932	0.548561744	0.303422865	-0.015920087	0.966343362	FALSE
419	PF3D7_0414700.1o1_7337	-0.37640108	0.095052125	0.471453206	0.204182451	0.472080602	0.688463217	0.156911965	0.914975982	FALSE
420	PF3D7_0414900.e4s1_5677	-0.469023178	-0.229062148	0.23996103	0.623161666	0.591588335	0.990952622	0.06169662	0.933789205	FALSE
421	PF3D7_0415000.1o1_7877	-0.509256104	-0.405057197	0.104198907	0.392799105	0.540232276	0.164510525	0.03390042	0.915060736	FALSE
422	PF3D7_0415100.iso1.exon1.amp1_2166	-0.232459158	-0.495431759	-0.262972601	0.050534341	0.543760307	0.183799022	-0.08488847	0.830402251	FALSE
423	PF3D7_0415300.iso1.exon1.amp1_4554	-0.29364877	0.336915469	0.630564239	0.170609197	0.964229597	0.820302802	0.110705022	0.914975982	FALSE
424	PF3D7_0415300.iso1.exon1.amp2_3693	-0.132743773	0.458049524	0.590793296	0.091584744	0.830720543	0.588308373	0.121955663	0.874701525	FALSE
425	PF3D7_0415400.1o1_6387	-0.62328338	-0.684249356	-0.060965976	0.382078393	0.266233836	0.109430424	-0.040060029	0.915060736	FALSE
426	PF3D7_0416300.iso1.exon1.amp2_462	-0.425994151	0.008244915	0.434239066	0.181093397	0.448824683	0.594037957	0.15491042	0.914975982	FALSE
427	PF3D7_0416400.iso1.exon2.amp1_1080	-0.126267538	0.084240759	0.210508297	0.595375798	0.61474586	0.792422096	0.05508324	0.933789205	FALSE
428	PF3D7_0416400.iso1.exon2.amp2_3664	-0.540528203	-0.317784937	0.222743266	0.321240211	0.390182349	0.42700446	0.094117103	0.915060736	FALSE
429	PF3D7_0416600.1o1_5263	-0.57231608	0.408539771	0.980855851	0.180852327	0.458202659	1.352815388	0.261781992	0.914975982	FALSE
430	PF3D7_0416900.iso1.exon2.amp2_seg1_2886	-0.639813919	-0.259866605	0.379947314	0.062712969	0.510116874	0.33195025	0.12831534	0.844903507	FALSE
431	PF3D7_0417100.1o4_5878	-0.027695686	-0.013870141	0.013825545	0.970780877	0.719224391	0.754015503	0.003186317	0.998686155	FALSE
432	PF3D7_0417400.iso1.exon1.amp4_seg2_2328	0.305249544	0.306030846	0.000781303	0.999194981	1.059499718	1.587080723	0.000115201	0.999858995	FALSE
433	PF3D7_0417400.iso1.exon1.amp6_seg1_1730	-0.447691939	-0.102060033	0.345631906	0.404460909	0.620047442	0.809647097	0.08946633	0.915831356	FALSE
434	PF3D7_0418000.6o10_5641	-0.34413411	-0.052007665	0.292126445	0.353598833	0.931602253	0.555207733	0.05424159	0.915060736	FALSE
435	PF3D7_0418000.7o10_5069	-0.800415708	-0.831299677	-0.030883969	0.935490607	0.549073767	0.779527456	-0.008886571	0.992371014	FALSE
436	PF3D7_0418800.iso1.exon4.amp1_2929	-0.609113256	-0.734222825	-0.125109569	0.480030794	0.334924805	0.344105072	-0.06206622	0.925003338	FALSE
437	PF3D7_0419100.iso1.exon1.amp1_2401	-0.539815583	-0.825757254	-0.285941671	0.002115696	0.427442881	0.093026357	-0.117907796	0.304515117	FALSE
438	PF3D7_0419200.1o1_6384	-1.030988885	-1.168964104	-0.137975218	0.38667933	0.528290757	0.270904828	-0.045428698	0.915060736	FALSE
439	PF3D7_0419300.iso1.exon1.amp1_2162	-0.158129938	0.531411761	0.689541699	0.093911868	0.622116355	0.706106779	0.181841144	0.875412376	FALSE
440	PF3D7_0419400.2o4_8826	-0.537388933	-0.729690159	-0.192301226	0.376081993	0.549453807	0.399238006	-0.059923653	0.915060736	FALSE
441	PF3D7_0419400.3o4_9115	-0.567183692	-0.336453393	0.230730299	0.171235598	0.536812063	0.278612301	0.074733624	0.914975982	FALSE
442	PF3D7_0419400.4o4_8537	-0.755494763	-1.019164944	-0.263670181	0.229351287	0.456368217	0.400396382	-0.097548823	0.915060736	FALSE
443	PF3D7_0419500.1o1_5301	-0.302592277	-0.152281259	0.150311018	0.296482547	0.553575051	0.222222995	0.047523529	0.915060736	FALSE
444	PF3D7_0419700.1o1_8146	-0.005895705	-0.352547701	-0.346651995	0.171203832	0.614700131	0.444499105	-0.096584361	0.914975982	FALSE
445	PF3D7_0419900.iso1.exon3.amp1_2826	-0.530675006	-0.71553381	-0.184858804	0.608049126	1.014724514	0.662398237	-0.031379637	0.933789205	FALSE
446	PF3D7_0419900.iso1.exon3.amp5_seg1_2006	-0.614071899	-0.194995334	0.419076565	0.331217076	0.516421285	0.836500377	0.124485891	0.915060736	FALSE
447	PF3D7_0420000.s2_5994	-0.324580461	-0.244722885	0.079857576	0.783044267	0.849377867	0.531324685	0.016228201	0.969245152	FALSE
448	PF3D7_0420300.iso1.exon1.amp1_521	-0.294167291	-0.24909081	0.045076481	0.941112575	0.78308612	1.254091471	0.008854857	0.992411159	FALSE
449	PF3D7_0420300.iso1.exon1.amp3_1099	-0.55584051	-0.332229385	0.223611126	0.653088434	0.673429694	1.007210985	0.05189026	0.933789205	FALSE
450	PF3D7_0420300.iso1.exon1.amp4_seg1_3445	-0.130512774	0.127283648	0.257796422	0.540399278	0.900781923	0.81213511	0.048202407	0.933789205	FALSE
451	PF3D7_0420600.iso1.exon1.amp1_2477	-0.363548649	-0.629617	-0.266068351	0.196660123	0.653669754	0.343613192	-0.070743415	0.914975982	FALSE
452	PF3D7_0420700.e2s1_8336	1.420633785	2.0709996	0.650365815	0.150242203	0.974002649	0.795849468	0.113401074	0.913650462	FALSE
453	PF3D7_0420900.iso1.exon1.amp1_4190	-0.013380401	0.505330314	0.518710715	0.239786336	0.803231186	0.81718572	0.10742106	0.915060736	FALSE
454	PF3D7_0421200.iso1.exon2.amp1_3312	0.257378912	1.186938555	0.929559643	0.144298436	1.155511456	1.130040584	0.134402166	0.911290123	FALSE
455	PF3D7_0421300.iso1.exon1.amp1_2739	0.556143212	2.028325334	1.472182123	0.027381007	1.17349633	1.022030551	0.211950558	0.731203283	FALSE
456	PF3D7_0421800.iso1.exon1.amp1_1236	-0.484710009	0.177399599	0.662109608	0.437307115	0.395917397	1.713612114	0.161721763	0.917134742	FALSE
457	PF3D7_0422000.5o5_7285	-0.098170799	-0.318440205	-0.220269406	0.432626695	0.761932006	0.512157315	-0.049720171	0.917134742	FALSE
458	PF3D7_0422100 (renamed)_7011	1.72771394	2.114719558	0.387005618	0.49653744	1.099506151	1.105552584	0.058627642	0.926395115	FALSE
459	PF3D7_0422200.iso1.exon1.amp4_2550	-0.255107418	-0.355370074	-0.100262655	0.78787861	0.818213348	0.727992056	-0.020663698	0.969245152	FALSE
460	PF3D7_0422300.e3s1_6907	-0.154004014	-0.045738971	0.108265043	0.745230755	0.712176869	0.652301692	0.025566469	0.960748063	FALSE
461	PF3D7_0422400.e2s1_5434	-0.214752886	-0.488800111	-0.274047225	0.332357874	0.729093142	0.513593079	-0.064476222	0.915060736	FALSE
462	PF3D7_0422500.e1s2_8254	-0.667454373	-0.397619346	0.269835027	0.412758053	0.309767548	0.654455946	0.123370121	0.917134742	FALSE
463	PF3D7_0422500.e1s3_5652	0.004981673	0.396665426	0.391683752	0.470659253	1.11041891	1.044589838	0.059168595	0.921428022	FALSE
464	PF3D7_0422700.e1s1_4878	-0.248906018	-0.338041041	-0.089135023	0.618969151	0.621775577	0.304009771	-0.024971572	0.933789205	FALSE
465	PF3D7_0423100.iso1.exon1.amp1_3832	-0.752899512	-0.879290807	-0.126391294	0.240276706	0.396562016	0.169268194	-0.055711035	0.915060736	FALSE
466	PF3D7_0423400.1o1_7833	-0.299386831	-0.404520196	-0.105133365	0.368868703	0.526369713	0.153918336	-0.035120934	0.915060736	FALSE
467	PF3D7_0423700.1o1_6673	0.825204323	1.391320915	0.566116592	0.434689988	1.388311272	1.396906707	0.067915407	0.917134742	FALSE
468	PF3D7_0424200.iso1.exon1.amp2_2772	-0.239621125	-0.147398701	0.092222424	0.885144101	1.046839174	1.291701338	0.014274159	0.985408067	FALSE
469	PF3D7_0424600.e2s1_8623	-0.309944976	0.130563589	0.440508565	0.381593773	0.635840396	0.986117263	0.107386555	0.915060736	FALSE
470	PF3D7_0424800.2o2_6416	0.110054683	1.043030613	0.93297593	0.246082096	0.734387858	1.527150304	0.180939919	0.915060736	FALSE
471	PF3D7_0425100.2o2_8127	0.620396359	0.341091124	-0.279305235	0.297778064	0.995780412	0.424195188	-0.049030897	0.915060736	FALSE
472	PF3D7_0425200.2o2_5531	-0.389179415	0.556065972	0.945245387	0.176524567	0.760364337	1.282327744	0.188753406	0.914975982	FALSE
473	PF3D7_0425300.1o1_8130	-0.455000838	-0.091056002	0.363944836	0.581025001	0.296831089	1.353753276	0.114235489	0.933789205	FALSE
474	PF3D7_0425500.iso1.exon1.amp1_1565	0.523592241	0.9988606	0.475268359	0.465824287	1.110352064	1.274763378	0.070110856	0.921428022	FALSE
475	PF3D7_0425700.iso1.exon1.amp1_4168	0.244024996	0.524492207	0.280467211	0.621193457	1.070805953	1.119100246	0.043431615	0.933789205	FALSE
476	PF3D7_0425800.iso1.exon1.amp1_3955	-0.661395132	-0.208739258	0.452655873	0.353074979	0.365074936	0.958999751	0.160604418	0.915060736	FALSE
477	PF3D7_0425800.iso1.exon1.amp2_4244	-0.89292893	-0.002445409	0.890483522	0.230445053	0.707522992	1.400156902	0.182299392	0.915060736	FALSE
478	PF3D7_0425800.iso1.exon2.amp1_4183	1.219876874	1.3733852	0.153508326	0.758612256	1.273438238	0.948604565	0.020607086	0.963819105	FALSE
479	PF3D7_0425900.iso1.exon2.amp1_4457	-0.381874972	-0.264215859	0.117659112	0.760056242	0.766059052	0.761835218	0.025614009	0.963906695	FALSE
480	PF3D7_0426000.iso1.exon1.amp1_4198	-0.418346708	-0.064201571	0.354145137	0.290015572	0.644333727	0.626462044	0.091884671	0.915060736	FALSE
481	PF3D7_0500100.iso1.exon1.amp1_2232	-0.655921519	-0.45061712	0.205304399	0.533339441	0.560304756	0.650391049	0.059923649	0.933789205	FALSE
482	PF3D7_0500100.iso1.exon2.amp1_1299	1.255338829	2.13350705	0.878168221	0.222209826	1.452846663	1.313578559	0.101778469	0.915060736	FALSE
483	PF3D7_0500400.iso1.exon1.amp1_3882	0.448247816	0.527772108	0.079524291	0.937437132	1.419259089	2.073026951	0.00880094	0.992371014	FALSE
484	PF3D7_0500500.iso1.exon1.amp1_2721	0.840871477	2.27331875	1.432447272	0.135355695	1.170356579	1.710060371	0.192229383	0.894556606	FALSE
485	PF3D7_0500800.e1s1_7120	-0.31993868	-0.491864453	-0.171925773	0.301537619	0.476824584	0.293354453	-0.062282949	0.915060736	FALSE
486	PF3D7_0500800.e2s1_8081	-0.427070992	0.565989815	0.993060808	0.359317972	1.11755579	2.123694189	0.130388418	0.915060736	FALSE
487	PF3D7_0500900.iso1.exon2.amp1_442	0.483845933	0.373232784	-0.11061315	0.893574155	1.294386586	1.678855043	-0.013731688	0.987703954	FALSE
488	PF3D7_0501000.e1s1_4842	-0.403462687	-0.637431121	-0.233968435	0.059856651	0.384768237	0.194711967	-0.105813466	0.844903507	FALSE
489	PF3D7_0501000.e2s1_5152	-0.235324905	0.124738225	0.36006313	0.439885882	0.364631254	0.933528484	0.129417905	0.918421455	FALSE
490	PF3D7_0501100.1.e3s1_7453	-0.018652589	0.317475727	0.336128316	0.658508023	1.09697965	1.535242395	0.048548555	0.935388296	FALSE
491	PF3D7_0501100.1.e4s1_6302	-0.900158245	-0.842541913	0.057616333	0.807586886	0.747471773	0.422145366	0.013362457	0.976058475	FALSE
492	PF3D7_0501100.iso2.exon3.amp1_2407	-0.553350807	-0.139129708	0.414221099	0.507074259	0.748922791	1.251286983	0.084182921	0.926395115	FALSE
493	PF3D7_0501200.e2_7703	-0.295117004	0.267925805	0.563042809	0.299674906	0.761012399	1.038406004	0.117798539	0.915060736	FALSE
494	PF3D7_0501500.e1s1_8931	-0.686402977	0.12187646	0.808279437	0.188327763	0.365735547	1.139018739	0.262657543	0.914975982	FALSE
495	PF3D7_0501600.e1s1_8642	-0.51172529	-0.642881964	-0.131156674	0.769308262	0.511764208	0.918565936	-0.038252672	0.966343362	FALSE
496	PF3D7_0501800.e1s1_4880	0.420609688	0.600000236	0.179390548	0.617356969	0.995357418	0.663082096	0.031011432	0.933789205	FALSE
497	PF3D7_0501800.e1s2_6042	0.353926868	0.606433686	0.252506819	0.583770735	1.245818197	0.854560073	0.034820377	0.933789205	FALSE
498	PF3D7_0501900.iso1.exon2.amp1_2980	-0.697034364	-0.775284339	-0.078249975	0.664077148	0.56029407	0.321676624	-0.024195005	0.935901032	FALSE
499	PF3D7_0502000.iso1.exon2.amp1_1211	-0.306601116	-0.440281637	-0.133680521	0.179737275	0.463619235	0.120137204	-0.050759423	0.914975982	FALSE
500	PF3D7_0502200.2o2_5863	-0.469694134	-0.671581884	-0.20188775	0.264423199	0.529914738	0.314540198	-0.065912889	0.915060736	FALSE
501	PF3D7_0502400.1o1_5886	0.602879054	0.996918334	0.39403928	0.611669951	1.167009337	1.556918676	0.053984504	0.933789205	FALSE
502	PF3D7_0502700.iso1.exon2.amp1_3857	0.189235982	0.335390038	0.146154056	0.808119846	0.876453236	1.224604571	0.026429662	0.976058475	FALSE
503	PF3D7_0502800.1o1_6679	-0.912238232	-0.751061851	0.161176381	0.727142201	0.560249724	0.944543069	0.043684532	0.957663815	FALSE
504	PF3D7_0503000.5o5_8733	-0.896392256	-0.881042927	0.015349329	0.956785165	0.63541389	0.553645609	0.004081039	0.99537408	FALSE
505	PF3D7_0503600.e1s1_5436	-0.402926392	-0.470493092	-0.0675667	0.788730387	0.402510303	0.509606996	-0.027084676	0.969245152	FALSE
506	PF3D7_0503600.e7s1_7736	-0.676979098	-0.684178835	-0.007199737	0.979419209	0.600572243	0.549047541	-0.002016504	0.998822427	FALSE
507	PF3D7_0503900.2o2_5032	-0.491449856	-0.412586848	0.078863009	0.868239212	0.819447727	0.957484608	0.015723954	0.985408067	FALSE
508	PF3D7_0504200.2o3_7328	-0.566139217	-0.400374561	0.165764656	0.595812492	0.330925912	0.635307156	0.073266596	0.933789205	FALSE
509	PF3D7_0504400.iso1.exon1.amp1_2757	-0.597568414	-0.515830917	0.081737497	0.713114849	0.713488952	0.392872971	0.019878395	0.950891862	FALSE
510	PF3D7_0504500.5o6_9016	-0.131827709	0.140645727	0.272473436	0.499301859	0.583742151	0.800823584	0.074241981	0.926395115	FALSE
511	PF3D7_0504600_5397	-0.321101231	-0.085989914	0.235111317	0.437178784	0.463401642	0.593520415	0.08170298	0.917134742	FALSE
512	PF3D7_0504800.iso1.exon1.amp1_1378	0.014813455	0.022086743	0.007273288	0.982215719	0.776751426	0.631298404	0.001590911	0.998822427	FALSE
513	PF3D7_0504800.iso1.exon1.amp2_1667	-0.577487628	-0.455396418	0.12209121	0.710529062	0.542208402	0.660593559	0.036558165	0.94967775	FALSE
514	PF3D7_0505100.iso1.exon1.amp1_1083	-0.09758977	-0.597272422	-0.499682652	0.056159257	0.938265062	0.387895434	-0.093154407	0.837609343	FALSE
515	PF3D7_0505100.iso1.exon1.amp2_3685	-0.281393046	0.315235924	0.59662897	0.256452939	0.525621266	1.000773298	0.166457051	0.915060736	FALSE
516	PF3D7_0505100.iso1.exon2.amp1_507	-0.619158298	-0.074817696	0.544340602	0.197388424	0.602290768	0.778075002	0.145326889	0.914975982	FALSE
517	PF3D7_0505100.iso1.exon2.amp2_1332	-0.380214587	0.152914184	0.53312877	0.269466718	0.648808263	0.916499923	0.129952742	0.915060736	FALSE
518	PF3D7_0505200.e1s1_6332	-0.667592913	-0.662339363	0.00525355	0.980713379	0.510756129	0.421452261	0.001745531	0.998822427	FALSE
519	PF3D7_0505400.1o1_4753	-0.631687296	-0.415318662	0.216368634	0.431752866	0.461899942	0.536153089	0.076607634	0.917134742	FALSE
520	PF3D7_0505500.e1s1_4811	-0.013192788	-0.344555131	-0.331362344	0.263270555	0.980686705	0.493870661	-0.058805901	0.915060736	FALSE
521	PF3D7_0505500.e2_6247	-0.256976551	-0.12236025	0.134616301	0.822105305	0.740358175	1.228951743	0.02772122	0.979585743	FALSE
522	PF3D7_0506200.1o1_7857	-0.17875341	-0.452533391	-0.273779981	0.033167961	0.674675453	0.086032053	-0.071662322	0.764497354	FALSE
523	PF3D7_0506300.iso1.exon1.amp1_3900	0.790440757	0.578486012	-0.211954745	0.529886691	0.594454432	0.663653713	-0.058628531	0.933789205	FALSE
524	PF3D7_0506800.e1_6284	-0.733344446	-0.626990905	0.106353542	0.731518693	0.727633123	0.597545117	0.024813603	0.957663815	FALSE
525	PF3D7_0506900.1o1_6208	-0.735867453	-0.574239542	0.161627911	0.58179873	0.656841358	0.564527049	0.041620116	0.933789205	FALSE
526	PF3D7_0507200.iso1.exon1.amp1_150	-0.317958135	-0.481012709	-0.163054575	0.339168493	0.519536267	0.297356757	-0.054378546	0.915060736	FALSE
527	PF3D7_0507300 (plasmodb revised)_5405	-0.078796375	-0.045240165	0.03355621	0.940239736	0.767948873	0.903094533	0.007132491	0.992371014	FALSE
528	PF3D7_0507700.e1s1_5454	-0.540761698	-0.217549941	0.323211757	0.098642493	0.534579416	0.324531506	0.104500886	0.875552328	FALSE
529	PF3D7_0507900.iso1.exon2.amp1_43	-0.527336571	-0.696962631	-0.16962606	0.272335412	0.43126469	0.272545092	-0.067857054	0.915060736	FALSE
530	PF3D7_0508000.1o1_6429	-0.235515947	-0.499206675	-0.263690728	0.1780189	0.656110462	0.317986514	-0.070025951	0.914975982	FALSE
531	PF3D7_0508400.4o4_6424	-0.634566643	-0.061476992	0.573089651	0.453480748	0.522995797	1.537046934	0.134323805	0.920899767	FALSE
532	PF3D7_0508500.s3_4828	-0.604439582	-0.545618975	0.058820607	0.881268499	0.761200129	0.784509683	0.012834657	0.985408067	FALSE
533	PF3D7_0508600.iso1.exon1.amp1_3875	-0.157281057	-0.419263718	-0.26198266	0.386192738	0.895466727	0.535391084	-0.050600593	0.915060736	FALSE
534	PF3D7_0508900.iso1.exon1.amp1_1678	-0.783274771	-1.250785797	-0.467511026	0.000402644	0.624313599	0.11062575	-0.132118454	0.125445912	FALSE
535	PF3D7_0508900.iso1.exon1.amp2_1967	-0.166669997	-0.774419817	-0.607749821	0.011111122	1.100470212	0.259357225	-0.097290202	0.527521817	FALSE
536	PF3D7_0508900.iso1.exon1.amp4_4215	-0.41606043	-0.468106847	-0.052046417	0.876292488	0.571792859	0.673994542	-0.014852604	0.985408067	FALSE
537	PF3D7_0509000.e5s1_6290	-0.191677005	-0.232676785	-0.04099978	0.874849806	0.764839423	0.477536383	-0.009253473	0.985408067	FALSE
538	PF3D7_0509100.iso1.exon1.amp1_2855	-0.185036599	-0.250703873	-0.065667274	0.874756375	0.691215888	0.841936364	-0.015424729	0.985408067	FALSE
539	PF3D7_0509100.iso1.exon1.amp2_3351	-0.652144935	-0.741578756	-0.089433821	0.714429933	0.441625305	0.487104724	-0.033352869	0.951771533	FALSE
540	PF3D7_0509200.iso1.exon4.amp1_392	-0.360320541	-0.392325088	-0.032004547	0.908022945	0.719500386	0.525990263	-0.007613131	0.990555727	FALSE
541	PF3D7_0509500.1o1_6441	-0.313236148	0.030056866	0.343293014	0.312553728	0.653583562	0.639924838	0.087743065	0.915060736	FALSE
542	PF3D7_0509600.2o2_7637	-0.483335215	-0.665443482	-0.182108267	0.455752929	0.564607203	0.461056077	-0.054780139	0.920899767	FALSE
543	PF3D7_0509700.e4s1_9186	-0.185671574	0.055147964	0.240819538	0.635368089	0.942745318	1.004138568	0.042259594	0.933789205	FALSE
544	PF3D7_0509800.2o4_8246	-0.559886319	-0.650888954	-0.091002635	0.817857462	0.413604842	0.815716227	-0.031904681	0.97901018	FALSE
545	PF3D7_0509900.iso1.exon1.amp1_3597	-0.03127666	0.60306976	0.63434642	0.008932664	0.793176265	0.338151224	0.139798849	0.481114739	FALSE
546	PF3D7_0510100.iso1.exon1.amp2_4582	-0.406100202	-0.254903203	0.151196999	0.651353935	0.640177125	0.660305465	0.039224384	0.933789205	FALSE
547	PF3D7_0510100.iso1.exon1.amp3_1915	-0.328612155	-0.124437392	0.204174763	0.564284514	0.881532157	0.667806972	0.039549869	0.933789205	FALSE
548	PF3D7_0510400.1o1_8464	0.142975287	0.418884502	0.275909215	0.62440556	0.93303613	1.124279811	0.048092463	0.933789205	FALSE
549	PF3D7_0510800.1o1_4938	-0.226142286	0.755372399	0.981514684	0.177545176	0.883425336	1.333126279	0.173284358	0.914975982	FALSE
550	PF3D7_0511100.iso1.exon2.amp1_1537	-0.374628077	-0.66671045	-0.292082373	0.004380541	0.514442612	0.077509845	-0.100225475	0.383844913	FALSE
551	PF3D7_0511300.iso1.exon1.amp1_2538	-0.348077486	-0.565475357	-0.217397871	0.185155745	0.617024104	0.251526981	-0.061647267	0.914975982	FALSE
552	PF3D7_0511400.1o1_4698	-0.315413787	0.445820552	0.761234339	0.090159251	0.601633896	0.768073544	0.203866975	0.874701525	FALSE
553	PF3D7_0511400_8865	0.197290604	1.134478874	0.93718827	0.164707081	1.017020878	1.220201324	0.14996611	0.914975982	FALSE
554	PF3D7_0511500.s1_7710	-0.606442191	-0.626898979	-0.020456789	0.93724358	0.597832603	0.505605695	-0.005795457	0.992371014	FALSE
555	PF3D7_0511500.s3_7138	-0.276979963	0.230460542	0.507440506	0.303418699	0.781325756	0.938694413	0.105671773	0.915060736	FALSE
556	PF3D7_0511500.s4_7427	-0.714665624	-0.398901123	0.315764501	0.385946676	0.613542549	0.703690426	0.084311484	0.915060736	FALSE
557	PF3D7_0511600.1o1_5809	-0.083486513	-0.106364668	-0.022878155	0.949958558	1.179932578	0.645526924	-0.003365216	0.99537408	FALSE
558	PF3D7_0512100.iso1.exon2.amp1_3546	-0.68164897	-0.912064446	-0.230415476	0.261088314	0.644805368	0.348439708	-0.062047329	0.915060736	FALSE
559	PF3D7_0512600.e6s1_7173	-0.223823016	-0.650952311	-0.427129295	0.037860752	0.747810203	0.297023559	-0.099989062	0.801055824	FALSE
560	PF3D7_0512900.iso1.exon1.amp1_3002	-0.703946677	-0.535723472	0.168223205	0.769914959	0.944205837	1.158998269	0.028891754	0.966343362	FALSE
561	PF3D7_0513000.e1s1_5733	-0.346834847	-0.523461606	-0.176626759	0.229632037	0.541735559	0.230715061	-0.05699359	0.915060736	FALSE
562	PF3D7_0513100.2o3_7569	-0.361573149	0.161083476	0.522656626	0.297320465	0.662238592	0.960742757	0.124139726	0.915060736	FALSE
563	PF3D7_0513200.e2s3_5488	-0.258616744	0.311575189	0.570191933	0.363468814	0.861314493	1.220258408	0.104634303	0.915060736	FALSE
564	PF3D7_0513300.e1s1_8334	-0.527288137	-0.606407263	-0.079119126	0.611808336	0.324235159	0.303759558	-0.040948827	0.933789205	FALSE
565	PF3D7_0513400.iso1.exon2.amp1_92	-0.368213609	-0.41934437	-0.051130761	0.758027115	0.518243148	0.297060204	-0.017093602	0.963667248	FALSE
566	PF3D7_0513700.e3s1_8904	-0.757306869	-0.824617204	-0.067310336	0.702250569	0.512479632	0.3221587	-0.022665241	0.945778384	FALSE
567	PF3D7_0514000.iso1.exon2.amp1_129	-0.145559648	-0.530244615	-0.384684967	0.016551765	0.739892025	0.176426649	-0.09158493	0.610672996	FALSE
568	PF3D7_0514100.iso1.exon1.amp2_3648	-0.478012924	-0.447710245	0.030302679	0.938625277	0.786125902	0.781709583	0.006428478	0.992371014	FALSE
569	PF3D7_0514600.iso1.exon2.amp1_2392	-0.460269939	-0.618368973	-0.158099034	0.097892468	0.451474623	0.108470444	-0.061682176	0.875552328	FALSE
570	PF3D7_0514900.1o1_8458	-0.71553053	-0.772434321	-0.05690379	0.863092097	0.392161721	0.679337805	-0.021874257	0.985408067	FALSE
571	PF3D7_0516000.iso1.exon1.amp1_2533	-0.504263051	-0.618671529	-0.114408478	0.521081387	0.560856427	0.313893683	-0.035374609	0.92766636	FALSE
572	PF3D7_0516400.1o1_9029	0.241164844	1.066172439	0.825007595	0.367457138	0.851735446	1.801584858	0.137125947	0.915060736	FALSE
573	PF3D7_0516500.5o6_7013	-0.525145629	-0.720969446	-0.195823817	0.100936627	0.35911658	0.194316024	-0.09467818	0.875552328	FALSE
574	PF3D7_0516600.s1_6862	-0.30201776	-0.293208479	0.008809281	0.977826549	0.712200695	0.619400041	0.002089998	0.998822427	FALSE
575	PF3D7_0516600.s2_5122	-0.390128207	0.623206238	1.013334445	0.121643004	0.763376736	1.154921213	0.206918542	0.881162544	FALSE
576	PF3D7_0516800.iso1.exon1.amp2_530	-0.454779725	-0.604461248	-0.149681523	0.539385856	0.444699464	0.478753967	-0.055609252	0.933789205	FALSE
577	PF3D7_0516800.iso1.exon1.amp3_1048	-0.451193232	-0.463745019	-0.012551787	0.956102468	0.516406136	0.444999661	-0.004110216	0.99537408	FALSE
578	PF3D7_0517600.1o1_7287	-0.161123547	-0.228249325	-0.067125778	0.697407864	0.641303072	0.282121346	-0.01828355	0.944366085	FALSE
579	PF3D7_0517700_5368	-0.323735903	-0.577608602	-0.2538727	0.121393024	0.728011263	0.209914992	-0.061327866	0.881162544	FALSE
580	PF3D7_0517900.2o2_7334	-0.148209322	-0.099390941	0.048818381	0.864484069	0.739940712	0.54320001	0.011288986	0.985408067	FALSE
581	PF3D7_0518400.iso1.exon1.amp1_4147	-0.797068082	-0.694403396	0.102664686	0.621100675	0.472450933	0.399809421	0.036802091	0.933789205	FALSE
582	PF3D7_0518600.iso1.exon1.amp1_1407	-0.301873709	-0.120290677	0.181583032	0.654327156	0.484499468	0.825530189	0.056751149	0.933789205	FALSE
583	PF3D7_0518600.iso1.exon1.amp2_1924	-0.506691926	-0.428474545	0.078217381	0.842813669	0.341134455	0.818798677	0.030904491	0.981270492	FALSE
584	PF3D7_0518700.e1s1_5478	-0.538751504	-0.619011024	-0.080259521	0.742456817	0.719095631	0.446052633	-0.019272337	0.960360308	FALSE
585	PF3D7_0518700.e3s1_8039	-0.578860523	-0.688681413	-0.10982089	0.489386515	0.437938363	0.290635555	-0.043157853	0.926395115	FALSE
586	PF3D7_0518800.iso1.exon7.amp1_2109	-0.043422447	0.306106052	0.349528499	0.324471278	0.626488612	0.674280823	0.092178539	0.915060736	FALSE
587	PF3D7_0518900.iso1.exon1.amp1_2982	-0.51079311	-0.56186186	-0.05106875	0.496760325	0.319503998	0.107806549	-0.028056624	0.926395115	FALSE
588	PF3D7_0519000.iso1.exon1.amp1_4167	-0.535563406	-0.120726701	0.414836705	0.32919616	0.440076676	0.827181854	0.138786566	0.915060736	FALSE
589	PF3D7_0519100.iso1.exon1.amp1_673	-0.396601909	-0.544196564	-0.147594655	0.344432141	0.406961714	0.283619618	-0.062250568	0.915060736	FALSE
590	PF3D7_0519200.e2s1_5387	-0.406961982	-0.826847192	-0.41988521	0.004985597	0.728442644	0.132311913	-0.101687263	0.40482314	FALSE
591	PF3D7_0519300.1o1_9072	-0.644454532	-0.837248621	-0.192794089	0.236341357	0.530678382	0.271571617	-0.06319647	0.915060736	FALSE
592	PF3D7_0519900.1o1_7902	-1.108187489	-0.856243705	0.251943784	0.18584663	0.595238801	0.318060585	0.073522882	0.914975982	FALSE
593	PF3D7_0520000.e3s1_9191	-0.723328792	-0.476114943	0.247213849	0.566527193	0.383518482	0.877678703	0.088584668	0.933789205	FALSE
594	PF3D7_0520100.e1s1_8338	0.144332675	-0.051689908	-0.196022583	0.52134929	0.877049835	0.554884128	-0.03855717	0.92766636	FALSE
595	PF3D7_0520400.e1s1_6896	0.338667027	0.402124043	0.063457016	0.743406428	0.643806015	0.337879775	0.017131654	0.960604435	FALSE
596	PF3D7_0521200.iso1.exon1.amp1_717	-0.500490225	-0.466172245	0.03431798	0.880044505	0.607652654	0.428637974	0.009686981	0.985408067	FALSE
597	PF3D7_0521300.iso1.exon3.amp1_2837	-0.704624005	-0.874647314	-0.170023309	0.468128238	0.48459009	0.450125592	-0.058927507	0.921428022	FALSE
598	PF3D7_0521300.iso1.exon3.amp2_seg2_577	-0.362130875	-0.395813021	-0.033682145	0.865901091	0.576946171	0.367655314	-0.010067873	0.985408067	FALSE
599	PF3D7_0521400.1o1_8497	0.183304681	0.050228469	-0.133076212	0.819211399	0.997130344	1.171638775	-0.021787231	0.979201671	FALSE
600	PF3D7_0521600.iso1.exon1.amp1_1810	-0.621520192	0.169688788	0.79120898	0.165931419	0.792277641	1.036215634	0.16023635	0.914975982	FALSE
601	PF3D7_0521700.e1s1_9110	-0.585918888	-0.74506186	-0.159142973	0.388021123	0.727282578	0.282143739	-0.038323236	0.915060736	FALSE
602	PF3D7_0521800.iso1.exon1.amp1_1519	-0.747316936	-0.879474462	-0.132157526	0.283301707	0.359781207	0.215212182	-0.063529742	0.915060736	FALSE
603	PF3D7_0522400.e3s3_9155	-0.307625042	-0.406260857	-0.098635814	0.800901115	0.747824682	0.778243601	-0.021882151	0.973280887	FALSE
604	PF3D7_0522400.e4s2_8874	-0.289421824	0.104068838	0.393490663	0.060240682	0.713363604	0.318474598	0.096317422	0.844903507	FALSE
605	PF3D7_0522400.e4s3_7140	-0.24846247	-0.016921547	0.231540923	0.707052994	0.871210536	1.249308866	0.041903937	0.948601242	FALSE
606	PF3D7_0522500.iso1.exon1.amp1_2655	-0.262530826	-0.490785418	-0.228254592	0.109325176	0.55241011	0.208755154	-0.072400376	0.881162544	FALSE
607	PF3D7_0523100.e2s1_7775	-0.59493748	-0.633565604	-0.038628124	0.677491644	0.252289275	0.173073483	-0.026303735	0.93820426	FALSE
608	PF3D7_0523400.3o3_6752	-0.375025014	-0.451150657	-0.076125642	0.745032395	0.800638604	0.40224813	-0.016549082	0.960748063	FALSE
609	PF3D7_0523800.1o1_7352	-0.732985472	-0.95651907	-0.223533598	0.126906245	0.663766365	0.182179119	-0.059253968	0.881162544	FALSE
610	PF3D7_0524100.iso1.exon1.amp1_509	-0.140080879	-0.3762994	-0.236218521	0.249917776	0.582971671	0.358680589	-0.069992599	0.915060736	FALSE
611	PF3D7_0524100.iso1.exon1.amp2_798	-0.552492489	-0.520045621	0.032446867	0.898125698	0.474244428	0.506810542	0.011314064	0.988767131	FALSE
612	PF3D7_0524200.iso1.exon1.amp1_3223	-0.311964982	-0.50853171	-0.196566728	0.432588165	0.593376729	0.469674773	-0.05639385	0.917134742	FALSE
613	PF3D7_0524300.1o1_8762	-0.246825177	-0.676976911	-0.430151734	0.091474213	0.895419337	0.391300817	-0.08392619	0.874701525	FALSE
614	PF3D7_0524400.e1s1_7190	-0.464404918	-0.038727938	0.425676981	0.297366911	0.638420945	0.776940783	0.108271826	0.915060736	FALSE
615	PF3D7_0524500.1o1_5233	-0.281176811	0.137525092	0.418701904	0.370385609	0.694387853	0.907105217	0.096770074	0.915060736	FALSE
616	PF3D7_0524700.1o1_6961	-0.604658285	-0.828393805	-0.22373552	0.275029002	0.463725412	0.375602333	-0.081994411	0.915060736	FALSE
617	PF3D7_0524700_8580	-0.997923439	-1.096064596	-0.098141157	0.737925085	0.617463792	0.57522246	-0.026687034	0.95902745	FALSE
618	PF3D7_0524800.iso1.exon1.amp1_2188	0.278339319	1.314461712	1.036122393	0.042015775	0.718106499	0.80673518	0.237048996	0.813959796	FALSE
619	PF3D7_0525000.1o1_7931	-0.536646921	-0.271290844	0.265356077	0.43289793	0.758603645	0.639938117	0.059256328	0.917134742	FALSE
620	PF3D7_0525100.e1s1_4897	-0.439091766	-0.504606867	-0.065515101	0.779223861	0.519027662	0.455634157	-0.021311071	0.968889936	FALSE
621	PF3D7_0525200.iso1.exon1.amp2_3987	-0.48323772	-0.595023838	-0.111786118	0.636636319	0.492735945	0.461866637	-0.038068935	0.933789205	FALSE
622	PF3D7_0525300.1o1_6447	-0.048247073	-0.072399794	-0.024152721	0.959457914	0.809992599	0.959330651	-0.004862146	0.996046265	FALSE
623	PF3D7_0525800.e1s1_6607	0.13967995	1.028882929	0.889202979	0.128012923	0.738794958	1.035289008	0.190649929	0.883745191	FALSE
624	PF3D7_0526200.iso2.exon7.amp1_2452	0.644125855	0.771877203	0.127751349	0.866165481	1.057726466	1.549167625	0.018959797	0.985408067	FALSE
625	PF3D7_0526600.iso1.exon1.amp4_3706	2.005185056	2.607096089	0.601911032	0.097535214	1.222586913	0.569816393	0.085873659	0.875552328	FALSE
626	PF3D7_0526900.iso1.exon3.amp1_1800	-0.792369817	-0.624217169	0.168152649	0.587121741	0.44521658	0.621350397	0.059874269	0.933789205	FALSE
627	PF3D7_0527200.e2s1_8350	0.626337605	0.878289882	0.251952277	0.729968907	1.082180275	1.478169027	0.03706159	0.957663815	FALSE
628	PF3D7_0527600.6o10_4989	-0.210151965	-0.661041878	-0.450889912	0.008037931	0.867297863	0.12291168	-0.091787341	0.450767168	FALSE
629	PF3D7_0528200.e2s1_7765	-0.244852951	-0.412983041	-0.16813009	0.545114386	0.950151821	0.472561207	-0.030808103	0.933789205	FALSE
630	PF3D7_0528300.1o1_5292	-0.059573962	-0.278756497	-0.219182536	0.507950143	0.895590319	0.609704827	-0.042062237	0.926395115	FALSE
631	PF3D7_0528400.4o8_8756	-0.477211906	-0.426464079	0.050747827	0.868209265	0.718099346	0.592365651	0.011993094	0.985408067	FALSE
632	PF3D7_0528500.iso1.exon5.amp1_2948	-0.589174805	-0.808298397	-0.219123592	0.203939281	0.4726386	0.299929764	-0.079968794	0.914975982	FALSE
633	PF3D7_0529000.1o1_7059	-0.300574039	-0.268641255	0.031932784	0.92279655	0.465811011	0.673720417	0.010789732	0.99230528	FALSE
634	PF3D7_0529400.1.e2s1_8277	-0.6580042	-0.921251451	-0.263247251	0.080041148	0.535492871	0.227838432	-0.085936212	0.862677656	FALSE
635	PF3D7_0529400.1.e5s1_7458	-0.474612847	-0.042028656	0.432584191	0.383852467	0.568818299	0.976505784	0.11492553	0.915060736	FALSE
636	PF3D7_0529400.1.e7s1_6001	-0.562322261	-0.112221223	0.450101038	0.10579213	0.259930978	0.484036338	0.255672529	0.881162544	FALSE
637	PF3D7_0529700.iso1.exon2.amp1_3636	-0.602782651	-0.419223984	0.183558666	0.620881183	0.56602317	0.74441612	0.051983037	0.933789205	FALSE
638	PF3D7_0530100.2o2_9005	1.006503029	2.682093664	1.675590636	0.000708717	1.034642108	0.593711346	0.280571755	0.180658517	FALSE
639	PF3D7_0530900.iso1.exon1.amp1_818	-0.278602096	0.445100614	0.72370271	0.090000785	0.584949375	0.729663549	0.200112363	0.874701525	FALSE
640	PF3D7_0530900.iso1.exon1.amp2_1107	-0.318764297	-0.401007734	-0.082243437	0.751788791	0.437923072	0.522487022	-0.030589154	0.962376195	FALSE
641	PF3D7_0530900.iso1.exon1.amp3_3077	-0.48296099	-0.40903249	0.0739285	0.832938587	0.449974929	0.71850702	0.025291464	0.980022573	FALSE
642	PF3D7_0531100.iso1.exon1.amp2_seg2_3774	-0.542142753	-0.692739038	-0.150596285	0.721224902	0.710988139	0.846615328	-0.034509981	0.95750546	FALSE
643	PF3D7_0531400.iso1.exon1.amp2_1631	-0.371419047	-0.529011575	-0.157592528	0.637506235	0.677341345	0.655126782	-0.038916972	0.933789205	FALSE
644	PF3D7_0532100_6557	1.363478182	2.850798893	1.487320711	0.016253961	1.333411385	0.915635153	0.191614929	0.609108571	FALSE
645	PF3D7_0532300.e2s1_9209	-0.298859029	0.265518379	0.564377408	0.356011835	0.79910823	1.189557782	0.110482794	0.915060736	FALSE
646	PF3D7_0532400.e1s1_5131	-1.009205805	-0.394831036	0.614374769	0.294756173	0.741887938	1.12411128	0.129042905	0.915060736	FALSE
647	PF3D7_0532400.e2s1_5163	-0.52891357	0.202698254	0.731611824	0.186817412	0.706161062	1.01898902	0.163142971	0.914975982	FALSE
648	PF3D7_0533100.iso1.exon1.amp1_3129	-0.612366076	-0.16062419	0.451741886	0.329216843	0.366889606	0.904717142	0.164063724	0.915060736	FALSE
649	PF3D7_0533100.iso1.exon1.amp2_3418	-0.437459533	0.525326331	0.962785864	0.03216526	0.645138424	0.693081866	0.246625356	0.764497354	FALSE
650	PF3D7_0533100.iso1.exon1.amp3_1389	-0.615263515	-0.558055549	0.057207966	0.784046335	0.323692897	0.422662139	0.028365858	0.969245152	FALSE
651	PF3D7_0600200.iso1.exon1.amp3_1938	-0.300047236	-0.298261762	0.001785474	0.994800188	0.790441701	0.506072406	0.000389456	0.998822427	FALSE
652	PF3D7_0600300.iso1.exon1.amp1_1286	0.185774637	1.020515068	0.834740431	0.392173458	1.011570567	1.925931386	0.121012912	0.915060736	FALSE
653	PF3D7_0600400.iso1.exon1.amp1_3033	1.177589186	1.873180847	0.69559166	0.041018153	0.937957499	0.532092338	0.128538183	0.809964087	FALSE
654	PF3D7_0600400.iso1.exon2.amp1_1895	-0.669155452	-0.683496155	-0.014340703	0.964285861	0.600589165	0.640880212	-0.003949312	0.997911665	FALSE
655	PF3D7_0600500.iso1.exon2.amp1_130	0.726829103	1.570155056	0.843325953	0.34502954	1.171328017	1.732799595	0.112780122	0.915060736	FALSE
656	PF3D7_0600700.iso1.exon1.amp1_4469	0.363253344	1.161263601	0.798010257	0.281791258	1.119199105	1.406369192	0.115188967	0.915060736	FALSE
657	PF3D7_0601000.iso1.exon1.amp1_3293	-0.556882653	-0.471094856	0.085787797	0.815814461	0.684992248	0.735347367	0.020698635	0.978189367	FALSE
658	PF3D7_0601200.iso1.exon2.amp1_695	0.195830645	0.806835735	0.611005091	0.416651938	1.070265705	1.476033617	0.090711402	0.917134742	FALSE
659	PF3D7_0601500.iso1.exon1.amp1_4480	-0.41319847	0.245498512	0.658696982	0.136047663	0.668689245	0.785185731	0.160826674	0.894556606	FALSE
660	PF3D7_0601700.2o2_6415	-0.611789757	-0.82126012	-0.209470364	0.269646676	0.658868759	0.310043644	-0.055439568	0.915060736	FALSE
661	PF3D7_0602000.iso1.exon1.amp2_4515	-0.506649676	-0.583767317	-0.077117641	0.639165511	0.603227479	0.270366666	-0.022320931	0.933789205	FALSE
662	PF3D7_0602100.iso1.exon1.amp1_1671	0.464223179	1.464473878	1.000250699	0.011600299	0.937635937	0.574069797	0.184313026	0.533233436	FALSE
663	PF3D7_0602100.iso1.exon1.amp2_1960	-0.332932495	0.525842198	0.858774693	0.135579978	0.463071769	1.028612153	0.257829775	0.894556606	FALSE
664	PF3D7_0602200.1o3_6695	-0.449599739	-0.175750742	0.273848997	0.497376698	0.505560646	0.806326884	0.083408476	0.926395115	FALSE
665	PF3D7_0602600.iso1.exon3.amp1_4131	0.041705393	0.253900427	0.212195033	0.631385893	0.854126605	0.870639387	0.041316338	0.933789205	FALSE
666	PF3D7_0602600.iso1.exon4.amp1_377	-0.415168254	-0.416455567	-0.001287313	0.988457813	0.319940803	0.149334479	-0.000701787	0.998822427	FALSE
667	PF3D7_0602700.iso1.exon1.amp1_1591	-0.371429981	0.818802211	1.190232193	0.084279317	0.947400884	1.170741545	0.203511329	0.866049105	FALSE
668	PF3D7_0603100.1o1_7881	-0.569738279	-0.48249138	0.087246899	0.47850027	0.447469338	0.201384228	0.034039438	0.925003338	FALSE
669	PF3D7_0603300.iso1.exon1.amp1_2181	-0.132064492	-0.136459679	-0.004395187	0.982572243	0.755512057	0.328179595	-0.00101648	0.998822427	FALSE
670	PF3D7_0603800.16o20_7091	-0.201510249	0.155129157	0.356639407	0.148730903	0.775257581	0.406579312	0.079959159	0.913650462	FALSE
671	PF3D7_0604000.iso1.exon1.amp1_1983	-0.411645754	-0.073248778	0.338396976	0.508356928	0.701236956	1.019913461	0.075864688	0.926395115	FALSE
672	PF3D7_0604000.iso1.exon1.amp3_760	-0.255828065	0.382115479	0.637943543	0.33575795	0.679553214	1.291894958	0.137732003	0.915060736	FALSE
673	PF3D7_0604100.iso1.exon1.amp2_3651	0.522652668	1.11326592	0.590613252	0.025060518	0.796985727	0.394334852	0.129042367	0.710755726	FALSE
674	PF3D7_0604500.iso1.exon1.amp3_3986	-0.021819223	0.657557748	0.679376971	0.306275763	0.778311227	1.280110763	0.13339253	0.915060736	FALSE
675	PF3D7_0605000.iso1.exon1.amp1_1561	-0.74721724	-0.653843822	0.093373419	0.863303497	0.524608439	1.123686524	0.025083046	0.985408067	FALSE
676	PF3D7_0605500.iso1.exon2.amp1_4494	-0.468254853	-0.468766715	-0.000511862	0.99833036	0.734560749	0.445961534	-0.00012044	0.999858995	FALSE
677	PF3D7_0605600.iso1.exon1.amp1_3384	-0.966659025	-0.228351074	0.738307951	0.040167582	0.512601738	0.567226455	0.237113595	0.809964087	FALSE
678	PF3D7_0605600.iso1.exon1.amp2_2481	-0.832571561	-0.763438597	0.069132965	0.873051328	0.684420315	0.877479765	0.016263348	0.985408067	FALSE
679	PF3D7_0605600.iso1.exon4.amp1_4428	-0.3206397	-0.166846679	0.153793021	0.670936123	0.690960945	0.715511714	0.036948246	0.936977941	FALSE
680	PF3D7_0606000.iso1.exon1.amp2_2795	-0.774871704	-0.434644854	0.34022685	0.297809189	0.724704952	0.603751368	0.079609734	0.915060736	FALSE
681	PF3D7_0606100.iso1.exon4.amp1_4473	-0.395779429	0.938854646	1.334634075	0.027048426	0.685678296	0.904757059	0.311822795	0.731203283	FALSE
682	PF3D7_0606500.iso1.exon5.amp1_1589	-0.297248643	-0.299588115	-0.002339473	0.990890311	0.664367339	0.36262527	-0.000611216	0.998822427	FALSE
683	PF3D7_0606600.iso1.exon2.amp1_2254	-0.654565347	-0.197633737	0.45693161	0.401248822	0.663305199	1.07176762	0.10573862	0.915060736	FALSE
684	PF3D7_0606700.iso1.exon1.amp1_3408	-0.42196994	-0.377760085	0.044209855	0.83149796	0.585613525	0.3856493	0.012997793	0.980022573	FALSE
685	PF3D7_0606800.1o1_4981	0.180649026	1.010970835	0.830321809	0.088471639	0.85044136	0.829577186	0.163163613	0.874701525	FALSE
686	PF3D7_0607300.2o2_5577	-0.62024368	-0.548829824	0.071413856	0.868732233	0.736982364	0.871132711	0.015805071	0.985408067	FALSE
687	PF3D7_0607600.1o5_6489	-0.034618477	-0.231870667	-0.197252191	0.532229276	0.73751077	0.600616382	-0.045434296	0.933789205	FALSE
688	PF3D7_0607700.iso1.exon1.amp2_seg1_2869	-0.656884014	-0.771145557	-0.114261543	0.560592223	0.502815647	0.367922728	-0.038890974	0.933789205	FALSE
689	PF3D7_0608100.iso1.exon1.amp1_4297	-0.778235925	0.227654559	1.005890483	0.060888542	0.783830282	0.882402996	0.210776089	0.844903507	FALSE
690	PF3D7_0608100.iso1.exon1.amp2_2496	-0.397735527	1.155553174	1.553288701	0.026707968	1.091872015	1.06551057	0.237729584	0.731203283	FALSE
691	PF3D7_0608310.iso1.exon3.amp1_440	-0.762600912	-0.627195152	0.13540576	0.508021664	0.492958211	0.385983083	0.04679698	0.926395115	FALSE
692	PF3D7_0608400.iso1.exon2.amp1_1521	-0.348885216	-0.231291051	0.117594165	0.803598389	0.570039402	0.970870678	0.031240815	0.975028076	FALSE
693	PF3D7_0608500.2o2_7844	-0.513174124	-0.471542935	0.041631189	0.810607592	0.501661036	0.319947988	0.014310807	0.976058475	FALSE
694	PF3D7_0609000.iso1.exon1.amp1_3985	-0.249961754	-0.166854258	0.083107496	0.768456586	0.865595684	0.508905313	0.016617469	0.966343362	FALSE
695	PF3D7_0609000.iso1.exon1.amp2_4274	0.728580444	1.33538038	0.606799936	0.359865839	1.026224372	1.280408736	0.095635384	0.915060736	FALSE
696	PF3D7_0609300.iso1.exon1.amp1_745	-0.499705419	-0.496127079	0.003578339	0.990370467	0.537904556	0.595334629	0.001095128	0.998822427	FALSE
697	PF3D7_0609900.iso1.exon1.amp2_2850	-0.732423938	-0.565867081	0.166556857	0.516943331	0.486570621	0.501446942	0.05685552	0.926395115	FALSE
698	PF3D7_0610000.iso1.exon2.amp1_2117	-0.496149305	-0.741047343	-0.244898038	0.053798644	0.525482238	0.170485106	-0.081849086	0.830402251	FALSE
699	PF3D7_0610200.1o1_5636	-0.539496426	0.001920982	0.541417408	0.471615142	0.839491074	1.503097165	0.096330522	0.921428022	FALSE
700	PF3D7_0611800.iso1.exon5.amp1_seg1_1151	-0.393428735	-0.556406174	-0.162977439	0.304841833	0.440848197	0.28244096	-0.063737994	0.915060736	FALSE
701	PF3D7_0611800.iso1.exon5.amp3_508	-0.070293111	0.345180613	0.415473724	0.455086646	1.015536815	1.080232085	0.067693592	0.920899767	FALSE
702	PF3D7_0611900.iso1.exon1.amp1_2690	-0.429729064	-0.511623491	-0.081894427	0.562786123	0.666890359	0.173700691	-0.021616792	0.933789205	FALSE
703	PF3D7_0612700.1o1_6423	-0.704162771	-0.530623513	0.173539257	0.562161207	0.331483236	0.605671145	0.077737125	0.933789205	FALSE
704	PF3D7_0613300.iso1.exon3.amp1_635	-0.568823402	-0.755672899	-0.186849498	0.164655574	0.42963318	0.221379599	-0.075636133	0.914975982	FALSE
705	PF3D7_0613300.iso1.exon5.amp1_2341	-0.585477802	-0.601881745	-0.016403942	0.848928784	0.394197643	0.112703662	-0.007318999	0.981270492	FALSE
706	PF3D7_0613900.iso1.exon1.amp2_2265	-0.519872098	-0.634147258	-0.114275161	0.620114821	0.93926827	0.348478008	-0.02132469	0.933789205	FALSE
707	PF3D7_0614000.iso1.exon1.amp1_157	-0.551035769	-0.553583483	-0.002547714	0.989553496	0.364119678	0.389494817	-0.001156919	0.998822427	FALSE
708	PF3D7_0614400.1o1_8430	-0.403704549	0.025243144	0.428947694	0.498902845	1.368889483	1.216446773	0.052846898	0.926395115	FALSE
709	PF3D7_0614800.iso1.exon1.amp1_433	-0.695829348	-0.983471586	-0.287642238	0.147435544	0.799302068	0.286237251	-0.063112214	0.912603236	FALSE
710	PF3D7_0615100.1o1_7590	-0.235301761	0.105718075	0.341019836	0.373426008	0.477116526	0.749519909	0.110457853	0.915060736	FALSE
711	PF3D7_0615600.5o8_7086	-0.539146173	-0.068610579	0.470535594	0.441006446	0.447283316	1.22420859	0.133640685	0.919099687	FALSE
712	PF3D7_0615800.2o3_6521	-0.490465581	-0.448009301	0.04245628	0.93149093	0.961916682	0.983787735	0.007337471	0.992371014	FALSE
713	PF3D7_0616000.1o3_5009	-0.60635787	-0.429171128	0.177186742	0.390576403	0.594302365	0.36871143	0.051480717	0.915060736	FALSE
714	PF3D7_0616300.iso1.exon1.amp1_967	-0.56146271	0.464834062	1.026296771	0.117486419	0.906846983	1.150623926	0.182536421	0.881162544	FALSE
715	PF3D7_0616800.iso1.exon1.amp1_2475	-0.183434353	-0.113179722	0.070254631	0.761871369	0.680744062	0.424089079	0.017816781	0.964416895	FALSE
716	PF3D7_0617000.1o1_8750	-0.626379182	-0.771268592	-0.14488941	0.562286601	0.513332025	0.485853616	-0.047316829	0.933789205	FALSE
717	PF3D7_0617400.s3 (renamed)_7396	0.134081113	0.814569609	0.680488496	0.357701695	0.898041952	1.443555157	0.116458601	0.915060736	FALSE
718	PF3D7_0617600.iso1.exon1.amp1_3292	0.900509977	1.301939613	0.401429636	0.590917354	1.384657986	1.471305126	0.04797596	0.933789205	FALSE
719	PF3D7_0617700.iso1.exon1.amp1_3596	0.415733266	0.60290524	0.187171974	0.757013418	1.07192151	1.21053712	0.028667025	0.963667248	FALSE
720	PF3D7_0618500.1o1_6121	-0.707298816	-0.120715714	0.586583102	0.395561287	0.340896259	1.376136705	0.174546325	0.915060736	FALSE
721	PF3D7_0618700.1o2_6708	0.803105518	1.114831492	0.311725973	0.670836829	1.267489628	1.463547442	0.040251418	0.936977941	FALSE
722	PF3D7_0618900.2o10_5031	-0.541099127	-0.242745201	0.298353926	0.511236571	0.675246562	0.901888148	0.070628902	0.926395115	FALSE
723	PF3D7_0618900.iso2.exon2.amp1_2167	0.104971033	0.626254186	0.521283152	0.309056245	0.789357686	0.978522877	0.106922812	0.915060736	FALSE
724	PF3D7_0619000.1.12o14_6224	-0.745159857	-1.046800311	-0.301640453	0.190241125	0.675631297	0.392306563	-0.077310922	0.914975982	FALSE
725	PF3D7_0619000.1.e12_5382	-0.63586582	-0.834482603	-0.198616782	0.224899404	0.519619567	0.274890767	-0.066418461	0.915060736	FALSE
726	PF3D7_0619000.1.s1 (renamed)_5662	-0.750914009	-0.643706633	0.107207376	0.542488641	0.456639204	0.328403232	0.040222842	0.933789205	FALSE
727	PF3D7_0619000.iso2.exon13.amp1_3564	-0.549697415	-0.636762759	-0.087065344	0.518727509	0.531103975	0.209142699	-0.028702646	0.927464915	FALSE
728	PF3D7_0619400.iso1.exon1.amp1_727	-0.489738663	-0.309483145	0.180255518	0.57682833	0.688467435	0.625488509	0.044066405	0.933789205	FALSE
729	PF3D7_0619400.iso1.exon2.amp1_2684	-0.375261514	-0.133036539	0.242224976	0.625742974	0.537883703	1.011854772	0.066285673	0.933789205	FALSE
730	PF3D7_0619700.iso1.exon2.amp1_2417	-0.447853237	-0.5229338	-0.075080563	0.605505718	0.633351527	0.203542347	-0.020821991	0.933789205	FALSE
731	PF3D7_0619900.iso1.exon1.amp1_2419	-0.75521828	-0.219223871	0.535994409	0.39330095	0.915936655	1.225215152	0.093516454	0.915060736	FALSE
732	PF3D7_0620000.1o1_5588	-0.150698812	0.116649106	0.267347918	0.237740649	0.654059501	0.392676771	0.070682992	0.915060736	FALSE
733	PF3D7_0620100.2o2_6690	-0.495384863	-0.455895341	0.039489522	0.848346729	0.334534448	0.417795136	0.019089237	0.981270492	FALSE
734	PF3D7_0620200.1o1_6128	0.055384024	0.260608293	0.205224268	0.661733619	0.876442485	0.928630891	0.038762796	0.935901032	FALSE
735	PF3D7_0620400.1o1_7613	0.617203182	2.01608036	1.398877178	0.222467381	1.403443418	2.145127521	0.155014922	0.915060736	FALSE
736	PF3D7_0620600.1o1_5842	0.067016895	-0.54300463	-0.610021525	0.025294462	0.884439088	0.401989571	-0.12038325	0.710755726	FALSE
737	PF3D7_0621200.iso1.exon1.amp1_1855	-0.14846839	-0.174089659	-0.025621269	0.911690008	0.720616447	0.415146597	-0.00615878	0.991159216	FALSE
738	PF3D7_0621400.1o1_8784	-0.063829568	0.166786774	0.230616341	0.579858629	0.689067213	0.827835165	0.054454778	0.933789205	FALSE
739	PF3D7_0621900.1o1_7648	-0.568912126	-0.023373033	0.545539092	0.430633898	0.875073549	1.368454	0.096446458	0.917134742	FALSE
740	PF3D7_0622000.iso1.exon1.amp1_2087	-0.273660603	-0.459122386	-0.185461783	0.200843479	0.431745916	0.246829324	-0.074431377	0.914975982	FALSE
741	PF3D7_0622000.iso1.exon3.amp1_2970	0.163280822	0.720482257	0.557201435	0.4659192	1.081172163	1.512019346	0.081667496	0.921428022	FALSE
742	PF3D7_0622100.iso1.exon1.amp1_seg1_3159	-0.607519889	-0.698853945	-0.091334055	0.373168303	0.391477737	0.160741955	-0.040815207	0.915060736	FALSE
743	PF3D7_0622100.iso1.exon1.amp2_seg2_2303	-0.540019934	-0.418838158	0.121181776	0.552845125	0.482826104	0.38827418	0.042676781	0.933789205	FALSE
744	PF3D7_0622800.s1 (renamed)_4799	0.611190822	0.730547233	0.119356411	0.823682872	1.015803956	1.06768031	0.019470268	0.979585743	FALSE
745	PF3D7_0622800.s2 (renamed)_5666	-0.41630257	0.153801003	0.570103573	0.17384748	0.665060402	0.760753578	0.140482873	0.914975982	FALSE
746	PF3D7_0623300.iso1.exon4.amp1_75	-0.318627569	-0.461986086	-0.143358517	0.09939143	0.255461962	0.14228781	-0.097333145	0.875552328	FALSE
747	PF3D7_0623400.1o1_5006	-0.00969364	0.025249135	0.034942775	0.920516255	0.777265841	0.685346807	0.007587055	0.991597226	FALSE
748	PF3D7_0623700.iso1.exon1.amp2_4528	-0.336276766	-0.249378999	0.086897768	0.681657961	0.67958664	0.37391867	0.022188256	0.93820426	FALSE
749	PF3D7_0623800.iso1.exon1.amp3_470	-0.509299083	-0.662930741	-0.153631657	0.484247139	0.745272345	0.373137644	-0.035883188	0.925615536	FALSE
750	PF3D7_0623900.1o1_5269	0.110297869	0.437872722	0.327574853	0.668841126	1.297950058	1.530345923	0.041179986	0.936894427	FALSE
751	PF3D7_0624500.iso1.exon1.amp1_1536	-0.463356102	-0.550171981	-0.08681588	0.122320285	0.288959871	0.048821445	-0.053016761	0.881162544	FALSE
752	PF3D7_0624600.iso1.exon1.amp2_2263	-0.410479158	-0.566490346	-0.156011188	0.425709477	0.51202536	0.360105927	-0.052271159	0.917134742	FALSE
753	PF3D7_0624900.iso1.exon8.amp1_2391	-0.528660319	-0.387371436	0.141288883	0.641901821	0.430076922	0.613146231	0.05185931	0.933789205	FALSE
754	PF3D7_0625000.iso2.exon1.amp1_1527	0.072058034	-0.001766939	-0.073824973	0.79578467	0.710239556	0.545173321	-0.017733408	0.970587306	FALSE
755	PF3D7_0625400.1o1_5288	-0.044738883	0.196323359	0.241062242	0.456309633	0.443005063	0.640327959	0.085656704	0.920899767	FALSE
756	PF3D7_0625500.1o1_7006	-0.573670199	-0.849152352	-0.275482153	0.012983757	0.533194835	0.108737371	-0.091097526	0.553944093	FALSE
757	PF3D7_0625600.1o1_7626	-0.45118424	1.060804624	1.511988864	0.073931785	0.562191535	1.410485142	0.355670813	0.862677656	FALSE
758	PF3D7_0626100.iso1.exon2.amp1_4098	-0.520310975	-0.748146576	-0.227835601	0.192879174	0.470581524	0.304316641	-0.083434786	0.914975982	FALSE
759	PF3D7_0626600.1o1_6969	-0.178825844	-0.399059416	-0.220233572	0.24368977	0.552049161	0.327071972	-0.069024938	0.915060736	FALSE
760	PF3D7_0626800.iso1.exon1.amp1_2938	-0.473573923	-0.430000366	0.043573557	0.887359261	0.56790582	0.615902055	0.012664439	0.985408067	FALSE
761	PF3D7_0626800.iso1.exon2.amp1_1841	-0.228662624	0.507682513	0.736345137	0.387501763	1.013280692	1.674389478	0.110920099	0.915060736	FALSE
762	PF3D7_0626800.iso1.exon3.amp1_689	0.17388049	0.492347012	0.318466522	0.45640283	0.780405429	0.830620714	0.067516638	0.920899767	FALSE
763	PF3D7_0626900.1o1_4986	0.568481595	0.883029889	0.314548295	0.601971132	0.919598505	1.207657179	0.054843226	0.933789205	FALSE
764	PF3D7_0627000.1o1_6672	-0.639064022	-0.711923285	-0.072859263	0.57493956	0.523561651	0.197978944	-0.024383443	0.933789205	FALSE
765	PF3D7_0627100.iso1.exon1.amp1_4595	-0.098762973	0.257595647	0.35635862	0.539176758	1.00734803	1.144056818	0.05803281	0.933789205	FALSE
766	PF3D7_0627400.1o1_5247	-0.180657033	-0.378728465	-0.198071432	0.413111689	0.601961212	0.448676366	-0.056246975	0.917134742	FALSE
767	PF3D7_0628000.1o1_7263	-0.267820099	-0.30688388	-0.039063782	0.878815764	0.500928815	0.509687225	-0.012971721	0.985408067	FALSE
768	PF3D7_0628100.iso1.exon1.amp10_2250	-0.585283575	-0.719122779	-0.133839203	0.271103877	0.431430183	0.196582272	-0.054141991	0.915060736	FALSE
769	PF3D7_0628100.iso1.exon1.amp11_1613	-0.575795316	-0.736679341	-0.160884025	0.327227319	0.429436204	0.297207126	-0.064329824	0.915060736	FALSE
770	PF3D7_0628100.iso1.exon1.amp6_2244	-0.614131928	-0.660054088	-0.04592216	0.792153022	0.801532204	0.225934786	-0.010078138	0.969245152	FALSE
771	PF3D7_0628100.iso1.exon1.amp7_1383	-0.424397396	-0.171904186	0.25249321	0.56370687	0.698889584	0.869793433	0.058456814	0.933789205	FALSE
772	PF3D7_0628100.iso1.exon1.amp9_1961	0.719914064	0.874234745	0.154320681	0.582766306	0.978485795	0.47444073	0.027479267	0.933789205	FALSE
773	PF3D7_0628200.s1_6574	-0.446810546	-0.480274748	-0.033464202	0.814912082	0.51941527	0.237848082	-0.011242748	0.978189367	FALSE
774	PF3D7_0628200.s2 (renamed)_6863	0.18195812	0.455203839	0.273245718	0.381345515	0.722443189	0.582881266	0.064296536	0.915060736	FALSE
775	PF3D7_0628600.iso1.exon3.amp1_4371	-0.664241989	-0.84543319	-0.181191201	0.149280437	0.364882762	0.211374119	-0.085997501	0.913650462	FALSE
776	PF3D7_0629000.iso1.exon1.amp1_120	-0.308499098	-0.251451873	0.057047225	0.832283802	0.645069213	0.519403708	0.01503599	0.980022573	FALSE
777	PF3D7_0629300.1o1_7935	-0.399143753	1.0349276	1.434071353	0.149217531	0.742455	1.796424093	0.259464417	0.913650462	FALSE
778	PF3D7_0629500.1o2_8488	-0.9765034	-0.744514385	0.231989016	0.587642624	0.565876548	0.862051303	0.063805883	0.933789205	FALSE
779	PF3D7_0629600.iso1.exon2.amp1_3286	-0.662439358	-0.483919578	0.17851978	0.505015497	0.5340737	0.518926929	0.05588397	0.926395115	FALSE
780	PF3D7_0629700.s3 (renamed)_7149	-0.519682417	-0.604401419	-0.084719002	0.588503299	0.546003412	0.264425938	-0.027035587	0.933789205	FALSE
781	PF3D7_0629700.s5 (renamed)_7727	0.19374633	0.151908388	-0.041837942	0.928251337	1.151496296	0.89156315	-0.006195003	0.99230528	FALSE
782	PF3D7_0629900.iso1.exon1.amp1_3279	-1.374261222	-1.171657732	0.202603489	0.471742235	0.758005498	0.517076356	0.045932758	0.921428022	FALSE
783	PF3D7_0630300.iso1.exon2.amp3_4257	-0.344382663	-0.368218068	-0.023835405	0.919950108	0.462241699	0.472362989	-0.008573075	0.991368218	FALSE
784	PF3D7_0630600.2o2_8237	0.663468824	1.843620934	1.18015211	0.014189278	0.913218556	0.699850342	0.220498132	0.576619356	FALSE
785	PF3D7_0631000.iso1.exon1.amp1_2426	-0.731700847	-0.448218546	0.283482301	0.317961191	0.484256562	0.540017135	0.09627222	0.915060736	FALSE
786	PF3D7_0631100.iso1.exon2.amp1_1011	-0.085696168	0.412093831	0.497789999	0.107341667	0.637638199	0.531464944	0.132377573	0.881162544	FALSE
787	PF3D7_0631400.iso1.exon1.amp1_1562	0.252979603	0.613789989	0.360810386	0.623003758	1.167448787	1.468389988	0.049920975	0.933789205	FALSE
788	PF3D7_0631800.iso1.exon2.amp1_3318	0.394863436	0.688788636	0.2939252	0.7027487	0.938565793	1.572257565	0.047632754	0.945994889	FALSE
789	PF3D7_0631900.iso1.exon2.amp1_3298	0.473036136	0.812040656	0.33900452	0.712290406	1.244173439	1.868910173	0.042539973	0.950624606	FALSE
790	PF3D7_0632000.iso1.exon2.amp1_3020	-0.118155901	0.58488545	0.703041351	0.267132628	0.847092073	1.202009036	0.131137543	0.915060736	FALSE
791	PF3D7_0632100.iso1.exon1.amp1_705	-0.653495315	0.004714449	0.658209764	0.315763428	0.573648404	1.27564361	0.159454708	0.915060736	FALSE
792	PF3D7_0632200.iso1.exon1.amp1_3015	0.423501946	1.74747991	1.323977964	0.209089027	1.050997032	1.967568093	0.185699508	0.915060736	FALSE
793	PF3D7_0632300.iso1.exon2.amp1_423	-0.046435753	0.660253328	0.706689081	0.309900798	0.869764314	1.340442912	0.126124463	0.915060736	FALSE
794	PF3D7_0632400.iso1.exon2.amp1_3304	0.20372152	1.026963105	0.823241585	0.394222559	1.014231537	1.907893754	0.119476702	0.915060736	FALSE
795	PF3D7_0632500.iso1.exon1.amp1_3326	0.438535657	2.225671637	1.78713598	0.024552207	1.265366679	1.199877307	0.236720846	0.710755726	FALSE
796	PF3D7_0632500.iso1.exon2.amp1_1064	-0.358191096	-0.495132403	-0.136941307	0.402894911	0.507475001	0.286252445	-0.046781671	0.915060736	FALSE
797	PF3D7_0632500.iso1.exon2.amp3_492	-0.490763091	-0.367156429	0.123606662	0.709354616	0.538638121	0.666652949	0.037164395	0.949521883	FALSE
798	PF3D7_0632500.iso1.exon2.amp4_seg2_4605	-0.359438337	-0.574902998	-0.215464662	0.341700756	0.648109262	0.40260324	-0.057401517	0.915060736	FALSE
799	PF3D7_0632700.iso1.exon2.amp1_2437	0.549481242	1.245366636	0.695885394	0.376485794	1.041926874	1.536830474	0.104686491	0.915060736	FALSE
800	PF3D7_0632800.iso1.exon1.amp1_4482	-0.323899031	0.45903487	0.7829339	0.380331789	1.118215366	1.748058433	0.108328049	0.915060736	FALSE
801	PF3D7_0700100.iso1.exon3.amp1_1301	0.938850947	2.26699396	1.328143013	0.053330913	1.207815205	1.117446978	0.184755153	0.830402251	FALSE
802	PF3D7_0700200.iso1.exon3.amp1_994	0.000815211	0.160647833	0.159832623	0.753954609	0.777848486	1.032158806	0.032885038	0.963667248	FALSE
803	PF3D7_0700300.iso1.exon3.amp1_3589	-0.334834654	-0.324552031	0.010282623	0.975079215	0.492900338	0.671062052	0.003322907	0.998822427	FALSE
804	PF3D7_0700400.iso1.exon3.amp1_4165	0.611922557	1.432957824	0.821035267	0.394999134	1.302144268	1.890907258	0.099157206	0.915060736	FALSE
805	PF3D7_0700500.iso1.exon3.amp1_2741	0.251725583	0.921558626	0.669833043	0.370743664	1.084284347	1.454160772	0.098675881	0.915060736	FALSE
806	PF3D7_0701000.1o1_5806	0.936978969	2.391649459	1.45467049	0.021923397	1.105561779	0.95282101	0.222498452	0.683842929	FALSE
807	PF3D7_0701100.iso1.exon3.amp1_2151	0.709017844	1.428705325	0.719687481	0.397563947	1.039798507	1.673558955	0.106342416	0.915060736	FALSE
808	PF3D7_0701600.iso1.exon2.amp1_4435	-0.254607922	0.423720164	0.678328086	0.381850353	1.005619454	1.517938557	0.105199131	0.915060736	FALSE
809	PF3D7_0701800.iso1.exon1.amp1_3301	0.26543806	0.351647615	0.086209555	0.877632266	0.903357126	1.134022542	0.01541972	0.985408067	FALSE
810	PF3D7_0701900.e2s1_9111	-0.1922107	0.181546337	0.373757037	0.095238248	0.68971564	0.361177381	0.094194544	0.875552328	FALSE
811	PF3D7_0702200.1o1_5873	-0.289950591	0.077448557	0.367399148	0.466618124	0.46303755	1.012564132	0.110966517	0.921428022	FALSE
812	PF3D7_0702300.2o2_7331	0.188509633	0.419915772	0.231406139	0.66880505	1.312351541	1.032955168	0.030029831	0.936894427	FALSE
813	PF3D7_0702300.e2_6828	-0.885324171	-0.755909376	0.129414795	0.599719204	0.547714139	0.475638118	0.039929468	0.933789205	FALSE
814	PF3D7_0702400.e1s1_8040	-0.099312458	0.410184729	0.509497187	0.411537481	1.130455475	1.197003541	0.074616056	0.917134742	FALSE
815	PF3D7_0702500.e1s1_8598	-0.592672327	-0.753245835	-0.160573508	0.581308184	0.444170918	0.581893216	-0.057988774	0.933789205	FALSE
816	PF3D7_0702600.iso1.exon1.amp1_3842	-0.283168108	-0.428499212	-0.145331104	0.56613916	0.545525619	0.489304691	-0.044891174	0.933789205	FALSE
817	PF3D7_0703100.1o1_5246	0.036089291	0.426293416	0.390204125	0.374470327	0.9005814	0.832543676	0.072803819	0.915060736	FALSE
818	PF3D7_0703200.iso1.exon1.amp1_4307	-0.407692256	-0.340699625	0.06699263	0.847085169	0.724110038	0.68508542	0.015510172	0.981270492	FALSE
819	PF3D7_0703300.iso1.exon1.amp1_3572	-0.919639839	-0.655839757	0.263800082	0.353516144	0.618342254	0.532921571	0.072142447	0.915060736	FALSE
820	PF3D7_0703500.e2s2_7503	1.419628754	1.976309936	0.556681183	0.162284748	1.161632577	0.673014897	0.082992247	0.914975982	FALSE
821	PF3D7_0703700.e1s1_8629	-0.008804132	0.636528815	0.645332947	0.16356033	0.960986319	0.823611717	0.113610068	0.914975982	FALSE
822	PF3D7_0704000.iso1.exon1.amp1_seg1_3736	-0.341573248	-0.424366481	-0.082793234	0.61373024	0.650498848	0.254052094	-0.022288053	0.933789205	FALSE
823	PF3D7_0704200.iso1.exon1.amp1_252	-0.383405294	-0.284857149	0.098548145	0.540635612	0.503905074	0.284599141	0.033902722	0.933789205	FALSE
824	PF3D7_0704200.iso1.exon1.amp2_769	-0.171145404	0.166797844	0.337943248	0.311534719	0.453092665	0.641635083	0.117898805	0.915060736	FALSE
825	PF3D7_0704300.s1_6860	-0.682570169	-0.537911434	0.144658734	0.439548815	0.385026129	0.358274024	0.06309049	0.918401548	FALSE
826	PF3D7_0704500.iso1.exon1.amp2_178	-0.245484679	-0.128390686	0.117093993	0.663092544	0.73387508	0.499769406	0.027422103	0.935901032	FALSE
827	PF3D7_0704600.iso1.exon5.amp3_seg1_283	0.132221435	0.159081654	0.026860219	0.929180154	0.908999496	0.550501994	0.005107838	0.992371014	FALSE
828	PF3D7_0704800.iso1.exon1.amp1_3430	-0.281857351	0.329442223	0.611299574	0.194194526	0.989209725	0.847705406	0.104549029	0.914975982	FALSE
829	PF3D7_0704800.iso1.exon1.amp2_1629	0.108158922	0.857227454	0.749068533	0.111187487	1.08652756	0.803682573	0.117907315	0.881162544	FALSE
830	PF3D7_0704900.iso1.exon1.amp1_3311	-0.520279553	-0.45718957	0.063089983	0.842755647	0.686606812	0.624041497	0.015464608	0.981270492	FALSE
831	PF3D7_0705000.e1s1_7991	-0.041708909	-0.238238682	-0.196529773	0.573106212	0.829982408	0.663710953	-0.040279671	0.933789205	FALSE
832	PF3D7_0705000.e1s2_6251	-0.315404652	-0.108717217	0.206687436	0.637208552	1.118232775	0.826732884	0.031612242	0.933789205	FALSE
833	PF3D7_0705500.iso1.exon2.amp2_3383	0.71126301	1.028969883	0.317706873	0.372174735	0.869168875	0.658046626	0.062419604	0.915060736	FALSE
834	PF3D7_0705500.iso1.exon2.amp3_1354	-0.349859672	-0.003012896	0.346846776	0.18088644	0.661956562	0.453101995	0.090027312	0.914975982	FALSE
835	PF3D7_0705600.iso1.exon1.amp2_4245	-0.551678298	0.261686694	0.813364992	0.212529511	0.56742497	1.221801729	0.201620496	0.915060736	FALSE
836	PF3D7_0706500.iso1.exon1.amp1_3144	-0.755005134	-1.013210705	-0.258205571	0.171793083	0.686124016	0.294767725	-0.065771104	0.914975982	FALSE
837	PF3D7_0706700.1o1_8234	-0.231162416	-0.138809152	0.092353264	0.6451216	0.524450979	0.376391236	0.030173324	0.933789205	FALSE
838	PF3D7_0707200.iso1.exon1.amp1_1982	-0.717400554	-0.262826075	0.454574479	0.302622492	0.572263588	0.846594739	0.124429252	0.915060736	FALSE
839	PF3D7_0707300.2o5_6209	-0.476482099	-0.819134039	-0.34265194	0.042535879	0.64406387	0.238989274	-0.093248901	0.813959796	FALSE
840	PF3D7_0707400.iso1.exon1.amp1_1310	0.712203078	1.630603081	0.918400003	0.243397125	1.108900829	1.478829867	0.132426016	0.915060736	FALSE
841	PF3D7_0707500.iso1.exon1.amp2_467	-0.525175332	-0.434191939	0.090983393	0.821619813	0.771132374	0.803579926	0.019571251	0.979585743	FALSE
842	PF3D7_0707700.1o1_5353	0.158180731	0.210419363	0.052238632	0.85073772	0.998706196	0.465067324	0.009123709	0.981270492	FALSE
843	PF3D7_0708000.e1s1_9235	-0.523403496	-0.684884819	-0.161481322	0.45370775	0.771273124	0.355065412	-0.036530985	0.920899767	FALSE
844	PF3D7_0708000.e2s1_8905	-0.510243116	-0.657282562	-0.147039446	0.154767447	0.288953572	0.17574255	-0.087945852	0.914975982	FALSE
845	PF3D7_0708400.e1_5679	-0.571986957	-0.111636575	0.460350383	0.299457192	0.294653549	0.860963185	0.19209144	0.915060736	FALSE
846	PF3D7_0708400.e2_6536	-0.749717009	-0.786243195	-0.036526186	0.799331646	0.582802919	0.219441006	-0.010982296	0.972797714	FALSE
847	PF3D7_0709000.e3s1_5972	-0.622531816	-0.865755688	-0.243223872	0.02796243	0.514386065	0.122666223	-0.083292111	0.739685418	FALSE
848	PF3D7_0709100.e1s1_4890	-0.806103145	-0.368300697	0.437802448	0.452989838	0.814704616	1.152728865	0.084958258	0.920899767	FALSE
849	PF3D7_0709300.iso1.exon1.amp3_2493	-0.395331866	-0.090153718	0.305178148	0.252330963	0.620967964	0.483668019	0.083759973	0.915060736	FALSE
850	PF3D7_0709400.iso1.exon2.amp1_2171	0.354618202	1.063449785	0.708831583	0.11624989	0.929656304	0.780972675	0.129207738	0.881162544	FALSE
851	PF3D7_0709700.e1s1_7479	-0.039698684	-0.082948663	-0.043249979	0.904918439	0.932564823	0.688787111	-0.007932455	0.989727848	FALSE
852	PF3D7_0709900.3o3_8531	-0.387282018	-0.668284686	-0.281002668	0.055632933	0.710876569	0.152749052	-0.069677349	0.837609343	FALSE
853	PF3D7_0709900.e1s2_8563	-0.716502016	-0.487213466	0.22928855	0.620972661	0.677999153	0.932482245	0.053763875	0.933789205	FALSE
854	PF3D7_0709900.e2_7429	-0.612320764	0.808339289	1.420660052	0.077199239	0.540633188	1.347218815	0.348549898	0.862677656	FALSE
855	PF3D7_0709900.e3_5674	-0.014158442	-0.29207059	-0.277912148	0.226709312	0.820421935	0.367137467	-0.059146166	0.915060736	FALSE
856	PF3D7_0710200.iso1.exon1.amp2_seg1_3742	-0.610648308	-0.915032435	-0.304384126	0.021437567	0.394360563	0.196649995	-0.134371418	0.683842929	FALSE
857	PF3D7_0710200.iso1.exon1.amp3_3649	-0.594117854	0.442925066	1.03704292	0.149792161	0.423656714	1.302222128	0.293007849	0.913650462	FALSE
858	PF3D7_0710300.iso1.exon2.amp1_2630	-0.855762473	-1.028735062	-0.172972589	0.23841883	0.39534711	0.258635146	-0.075354139	0.915060736	FALSE
859	PF3D7_0710400_9160	0.179770427	0.342853235	0.163082807	0.832008737	1.155077577	1.562744377	0.022515455	0.980022573	FALSE
860	PF3D7_0710500.iso1.exon5.amp1_1229	-0.585392121	-0.502145301	0.08324682	0.736622154	0.355064385	0.502388659	0.037066961	0.958555259	FALSE
861	PF3D7_0711000.e1s1_7491	-0.10839352	-0.58743694	-0.479043421	0.023515527	0.710606916	0.307454907	-0.117800674	0.70239021	FALSE
862	PF3D7_0711000.e1s2_8942	-0.899744102	-0.805765693	0.093978409	0.727021596	0.636856518	0.518134918	0.025069722	0.957663815	FALSE
863	PF3D7_0711100.iso1.exon1.amp1_1552	-0.150988648	0.011114043	0.162102691	0.538297952	0.969753236	0.429424546	0.02919414	0.933789205	FALSE
864	PF3D7_0711200.iso1.exon1.amp1_2331	-0.567167142	-0.526453421	0.040713721	0.907568752	0.603962045	0.70693026	0.011011092	0.990555727	FALSE
865	PF3D7_0711300.iso1.exon1.amp1_3846	-0.548589494	-0.288109771	0.260479723	0.48262478	0.549629565	0.734076179	0.075756592	0.925003338	FALSE
866	PF3D7_0711700.e2s1_5452	1.285251031	2.64361069	1.358359659	3.31E-05	1.020335965	0.362620055	0.23350439	0.023203816	TRUE
867	PF3D7_0712000.iso1.exon1.amp1_145	1.03454045	2.275211817	1.240671367	0.050528347	1.078337545	1.02620458	0.192769946	0.830402251	FALSE
868	PF3D7_0712300.iso1.exon1.amp1_3615	0.527900671	1.44971721	0.92181654	0.099962427	0.912444684	0.965839237	0.167262879	0.875552328	FALSE
869	PF3D7_0712400.iso1.exon1.amp1_1004	0.270411255	0.831152812	0.560741557	0.355295762	0.959682573	1.169455448	0.094860976	0.915060736	FALSE
870	PF3D7_0712400.iso1.exon2.amp2_2529	-0.073205411	0.925445382	0.998650793	0.196518929	0.696674015	1.436157233	0.204782887	0.914975982	FALSE
871	PF3D7_0712600.iso1.exon1.amp1_434	0.342174815	2.024418733	1.682243917	0.006147578	1.002420056	0.820917258	0.284959583	0.410424048	FALSE
872	PF3D7_0712800.iso1.exon1.amp1_3904	0.580486299	1.800761837	1.220275537	0.101374123	1.117269839	1.287283729	0.178808169	0.875552328	FALSE
873	PF3D7_0712800.iso1.exon2.amp2_1944	-0.684087467	-0.636293833	0.047793634	0.903284788	0.62631286	0.797831896	0.012299858	0.988992794	FALSE
874	PF3D7_0712900.iso1.exon1.amp1_3316	0.591992431	1.985906775	1.393914344	0.067794578	1.221162747	1.268557512	0.189413295	0.862652712	FALSE
875	PF3D7_0712900.iso1.exon2.amp2_215	-0.559124208	-0.618138577	-0.059014369	0.687211549	0.543769746	0.239624009	-0.018956566	0.940430055	FALSE
876	PF3D7_0713000.iso1.exon2.amp1_2451	-0.372827972	-0.301096979	0.071730993	0.832572766	0.702869482	0.669395239	0.017097633	0.980022573	FALSE
877	PF3D7_0713100.2o2_5537	-0.438853532	-0.472163717	-0.033310185	0.927750108	0.706153195	0.732848072	-0.007828456	0.99230528	FALSE
878	PF3D7_0713600.iso1.exon1.amp1_3623	-0.356104205	0.013154403	0.369258608	0.136489003	0.407232979	0.439761101	0.149749243	0.894556606	FALSE
879	PF3D7_0713900.e1s1_5647	-0.816916666	-0.915755589	-0.098838922	0.673038124	0.557797319	0.448930397	-0.030127986	0.936977941	FALSE
880	PF3D7_0713900.e1s3_8249	-0.017811601	0.162552616	0.180364217	0.640924311	0.794398037	0.756340851	0.038039005	0.933789205	FALSE
881	PF3D7_0713900.e1s4_5937	1.051653861	0.83191569	-0.219738171	0.81014818	1.230257331	1.869434202	-0.027814469	0.976058475	FALSE
882	PF3D7_0714000.e1s1_6579	-0.565727545	-0.660954426	-0.095226881	0.475060899	0.38428081	0.240594526	-0.042770902	0.923125961	FALSE
883	PF3D7_0714200.iso1.exon1.amp2_463	-0.273261678	-0.303905284	-0.030643606	0.912640935	0.724187231	0.53061599	-0.007241191	0.991159216	FALSE
884	PF3D7_0715000.1o1_5833	-0.454659614	-0.417351873	0.037307741	0.858450781	0.450587846	0.410758372	0.013931053	0.985408067	FALSE
885	PF3D7_0715300.1o3_4714	-0.331277186	-0.442756726	-0.11147954	0.398320025	0.360538047	0.239343048	-0.053213881	0.915060736	FALSE
886	PF3D7_0715600.1o1_6202	-0.623122626	-0.896906454	-0.273783827	0.345119932	0.824188054	0.516373984	-0.057333038	0.915060736	FALSE
887	PF3D7_0715800.1o1_6729	-0.216337179	0.000240925	0.216578104	0.681050244	0.810105513	1.06131119	0.042883646	0.93820426	FALSE
888	PF3D7_0716200.1o1_8223	-0.391849853	-0.440120218	-0.048270364	0.888780879	0.389174088	0.712408631	-0.018407304	0.986424105	FALSE
889	PF3D7_0716300.e1s1_8921	0.874327898	1.688446167	0.814118269	0.116782696	1.014454511	0.901382181	0.135345186	0.881162544	FALSE
890	PF3D7_0717000.iso1.exon2.amp1_1484	-0.626412087	-0.931747491	-0.305335404	0.022827162	0.664336927	0.123072344	-0.081074489	0.695732207	FALSE
891	PF3D7_0717200.1o2_8169	-0.072424957	-0.378099602	-0.305674646	0.282899622	0.615074562	0.525663514	-0.084097795	0.915060736	FALSE
892	PF3D7_0717300.1o4_7894	-0.531860605	-0.653257834	-0.121397229	0.55972076	0.494816345	0.395677659	-0.041734203	0.933789205	FALSE
893	PF3D7_0717500.e1s1_5155	-0.171464945	0.582484323	0.753949268	0.311698171	0.664608213	1.446864928	0.158917496	0.915060736	FALSE
894	PF3D7_0717700.e1s1_9221	-0.47679701	-0.508993577	-0.032196567	0.820520162	0.495653525	0.241689057	-0.011316094	0.979585743	FALSE
895	PF3D7_0718000.e11s1_8030	-0.884005013	-0.972692247	-0.088687234	0.409877333	0.444467369	0.158252899	-0.034997111	0.917134742	FALSE
896	PF3D7_0718000.e4s1_4866	-0.350808985	-0.148031955	0.202777031	0.565643575	0.510272526	0.706481507	0.063095564	0.933789205	FALSE
897	PF3D7_0718000.e5s1_8036	-0.875073018	-0.613003922	0.262069096	0.603932555	0.618903562	1.022861352	0.064630029	0.933789205	FALSE
898	PF3D7_0718000.e9s3_8251	-0.808895662	-1.243255457	-0.434359795	0.00279403	0.606033314	0.169978469	-0.12608205	0.31337836	FALSE
899	PF3D7_0718000.e9s4_5939	-0.049548	-0.360126489	-0.310578489	0.250485295	0.931303772	0.441534829	-0.058141738	0.915060736	FALSE
900	PF3D7_0718100.iso1.exon1.amp2_1370	-0.376881879	0.047229896	0.424111775	0.277102316	0.469046607	0.745134521	0.139363855	0.915060736	FALSE
901	PF3D7_0718300.e5s1_8050	-0.000294809	-0.119394662	-0.119099852	0.845660647	1.085438693	1.228422477	-0.018008725	0.981270492	FALSE
902	PF3D7_0718300.e7s1_4783	-0.031460279	0.104318823	0.135779102	0.778470162	0.892951867	0.962807903	0.025116896	0.968889936	FALSE
903	PF3D7_0718600.iso1.exon6.amp1_3617	-0.117259983	0.33138692	0.448646903	0.290656742	0.655417094	0.806558999	0.110960018	0.915060736	FALSE
904	PF3D7_0718600.iso1.exon8.amp1_4159	-0.405534314	-0.0977316	0.307802714	0.451942077	0.828023625	0.786266978	0.062296496	0.920899767	FALSE
905	PF3D7_0718800.iso1.exon4.amp1_3221	-0.708440453	-0.855755429	-0.147314976	0.118935806	0.409508121	0.12493128	-0.063226289	0.881162544	FALSE
906	PF3D7_0719000.1o1_5524	-0.264117603	0.554109589	0.818227193	0.224060993	1.012641144	1.251806062	0.130883317	0.915060736	FALSE
907	PF3D7_0719100.iso1.exon2.amp1_947	-0.176688758	0.215746485	0.392435242	0.502643632	0.755184507	1.169255909	0.080579715	0.926395115	FALSE
908	PF3D7_0719200.e1s1_7415	-0.539330967	-0.822953232	-0.283622266	0.003166397	0.3991015	0.113525021	-0.124996186	0.337549502	FALSE
909	PF3D7_0719200.e9s1_8565	-0.274108768	-0.10415555	0.169953217	0.759567211	0.610486226	1.141589945	0.0410521	0.963906695	FALSE
910	PF3D7_0719400.s1_5695	-0.916478554	-1.057767712	-0.141289158	0.568143625	0.581425279	0.471913819	-0.041291122	0.933789205	FALSE
911	PF3D7_0719500.1o2_8186	-0.19859012	0.080795271	0.27938539	0.550839735	0.734705838	0.931395581	0.061342882	0.933789205	FALSE
912	PF3D7_0719500.2o2_9047	-0.556350364	-0.65912182	-0.102771456	0.566045	0.339941962	0.351145703	-0.05020025	0.933789205	FALSE
913	PF3D7_0719600.e2_5954	-0.491697483	-0.506031238	-0.014333755	0.899552408	0.27817869	0.218321052	-0.008777172	0.988767131	FALSE
914	PF3D7_0719700 (renamed)_9040	1.630407408	1.94050984	0.310102431	0.612696455	1.106663953	1.212080269	0.046192905	0.933789205	FALSE
915	PF3D7_0719700.e3s1_7128	-0.474950454	-0.582753361	-0.107802907	0.438896951	0.321930059	0.262413658	-0.056881223	0.917723379	FALSE
916	PF3D7_0721000.iso1.exon1.amp1_1958	-0.557479161	-0.472353077	0.085126085	0.859042459	0.823812108	0.965463948	0.016875418	0.985408067	FALSE
917	PF3D7_0721000.iso1.exon1.amp2_2247	-0.563801331	-0.469750781	0.09405055	0.809679543	0.877937125	0.760726334	0.018106887	0.976058475	FALSE
918	PF3D7_0721100_5690	-0.146481172	-0.204808946	-0.058327774	0.790511278	0.980485229	0.29876303	-0.010455713	0.969245152	FALSE
919	PF3D7_0721600.e2s1_4856	-0.348806243	-0.355231459	-0.006425215	0.95713914	0.270415721	0.233357547	-0.004017477	0.99537408	FALSE
920	PF3D7_0721700_4819	-0.633352888	0.648171521	1.281524409	0.013236182	0.466652024	0.704562595	0.428268633	0.553944093	FALSE
921	PF3D7_0722600.e1s1_6051	-0.548841716	-0.45670783	0.092133886	0.822339573	0.587421081	0.836227224	0.024766514	0.979585743	FALSE
922	PF3D7_0722800.1o1_5891	0.499377634	1.29293122	0.793553586	0.110150179	0.849438429	0.862813697	0.155427781	0.881162544	FALSE
923	PF3D7_0723000.iso1.exon1.amp1_3306	-0.198050099	-0.242345844	-0.044295746	0.872449578	0.596585159	0.54164098	-0.012497403	0.985408067	FALSE
924	PF3D7_0723200.e4s1_7754	-0.680808934	-0.769897018	-0.089088085	0.546735075	0.486849191	0.255916928	-0.031803623	0.933789205	FALSE
925	PF3D7_0723400.e1s2_6637	-0.471230449	-0.122904331	0.348326118	0.428463468	0.689889794	0.860373397	0.081668416	0.917134742	FALSE
926	PF3D7_0723500_4823	-0.736768291	-0.736003701	0.00076459	0.994241557	0.361236605	0.183103307	0.000368297	0.998822427	FALSE
927	PF3D7_0723700.iso1.exon1.amp2_1934	-0.745278021	-0.924672327	-0.179394306	0.152912842	0.600183792	0.141674923	-0.052655312	0.914975982	FALSE
928	PF3D7_0723800.iso1.exon1.amp3_2230	-0.784386556	-0.80838038	-0.023993824	0.927407822	0.457091869	0.530740128	-0.008584239	0.99230528	FALSE
929	PF3D7_0723800.iso1.exon2.amp1_2646	-0.34983574	0.142714076	0.492549816	0.523447811	0.698892549	1.562104604	0.097748326	0.929542534	FALSE
930	PF3D7_0723900.e1s2_5176	-0.403283283	0.405450666	0.808733949	0.033378375	0.507706901	0.586776097	0.26066845	0.764497354	FALSE
931	PF3D7_0724300.iso1.exon1.amp1_112	-0.509065555	-0.136152631	0.372912923	0.238016746	0.372070809	0.595512999	0.154200066	0.915060736	FALSE
932	PF3D7_0724400.iso1.exon1.amp1_2105	-0.695652592	-0.86013567	-0.164483078	0.230230164	0.545850286	0.20357729	-0.052811637	0.915060736	FALSE
933	PF3D7_0724700.e2s2_8380	-0.136402545	-0.441252927	-0.304850382	0.094403474	0.818569102	0.227067343	-0.065520583	0.875412376	FALSE
934	PF3D7_0725100.e1s1_5471	-0.591334131	-0.558373448	0.032960683	0.933512871	0.866909347	0.774726903	0.006408919	0.992371014	FALSE
935	PF3D7_0725200.iso1.exon3.amp1_3844	-0.433207613	-0.533255285	-0.100047672	0.099755674	0.306555865	0.056934252	-0.057568926	0.875552328	FALSE
936	PF3D7_0726100.2o2_6782	-0.603336254	-0.378418245	0.224918009	0.438309354	0.485195254	0.566097247	0.075754766	0.917178677	FALSE
937	PF3D7_0726200.iso1.exon2.amp1_1023	-0.282686185	-0.215190627	0.067495558	0.835568803	0.893777622	0.607869273	0.012979711	0.980022573	FALSE
938	PF3D7_0726400.e1s1_6882	-0.464675473	-0.63796287	-0.173287396	0.297269405	0.353755397	0.308656757	-0.082746586	0.915060736	FALSE
939	PF3D7_0726400.e1s3_8538	-0.790595053	-0.661757624	0.128837429	0.597174068	0.482490599	0.477273146	0.044557575	0.933789205	FALSE
940	PF3D7_0726400.e2s1_8610	-0.520824895	-0.797910546	-0.277085651	0.190043616	0.720771815	0.342150694	-0.067020753	0.914975982	FALSE
941	PF3D7_0726400.e2s2_9247	-0.20280659	-0.641801301	-0.438994711	0.049712041	0.774458099	0.334631718	-0.099055136	0.830402251	FALSE
942	PF3D7_0726400.e3s1_8933	-0.636457066	-0.655186307	-0.018729241	0.885461235	0.461710268	0.219634717	-0.007071616	0.985408067	FALSE
943	PF3D7_0726400.e6s1_8651	-0.941405525	-1.193046473	-0.251640949	0.368272022	0.59792407	0.526799887	-0.071031485	0.915060736	FALSE
944	PF3D7_0726400.e6s2_4899	0.588032759	1.170571312	0.582538552	0.227259547	0.829139815	0.89275393	0.116074012	0.915060736	FALSE
945	PF3D7_0726500.iso1.exon4.amp1_3386	-0.258967723	-0.035854002	0.223113721	0.654432684	0.693420393	1.007871316	0.050590421	0.933789205	FALSE
946	PF3D7_0726500.iso1.exon4.amp2_2525	-0.448952986	-0.511503771	-0.062550785	0.690474289	0.475677633	0.283516953	-0.022746278	0.942793383	FALSE
947	PF3D7_0726600.1o2_6479	-0.069516404	-0.515757674	-0.44624127	0.111871562	0.837455669	0.460711656	-0.092463356	0.881162544	FALSE
948	PF3D7_0727000.iso1.exon1.amp1_1996	-0.729280593	-0.675925122	0.053355471	0.892684019	0.565440789	0.807681117	0.014889747	0.987698579	FALSE
949	PF3D7_0727200.1o1_6756	-0.142381135	0.248865586	0.391246721	0.541557336	0.511511945	1.302749808	0.100480824	0.933789205	FALSE
950	PF3D7_0727800.iso1.exon1.amp1_4594	-0.206231995	-0.289995335	-0.08376334	0.789118276	0.85071989	0.58646744	-0.016910691	0.969245152	FALSE
951	PF3D7_0727900.e1s2_5080	-0.351324442	-0.341557512	0.009766931	0.975556127	0.724556488	0.621751905	0.002280293	0.998822427	FALSE
952	PF3D7_0728000.e2_6530	-0.714437054	-1.070697698	-0.356260644	0.038290805	0.756985806	0.211823952	-0.082792322	0.801055824	FALSE
953	PF3D7_0728200.2o2_7918	-0.48406906	0.003687289	0.48775635	0.483660214	0.939801291	1.384476253	0.081371484	0.925615536	FALSE
954	PF3D7_0728300.iso1.exon1.amp1_984	-0.468917555	-0.687782068	-0.218864513	0.049177895	0.324447464	0.174399099	-0.117152514	0.830402251	FALSE
955	PF3D7_0728600.iso1.exon1.amp1_205	-0.637289294	-0.674773786	-0.037484493	0.899532886	0.566380667	0.592538073	-0.01097296	0.988767131	FALSE
956	PF3D7_0728600.iso1.exon3.amp1_2396	0.321308677	0.570697453	0.249388776	0.567797612	1.090773803	0.822711954	0.039052604	0.933789205	FALSE
957	PF3D7_0728700.iso1.exon3.amp1_1258	-0.499224599	-0.203145608	0.296078991	0.323011921	0.411383665	0.57710774	0.113979585	0.915060736	FALSE
958	PF3D7_0728800.iso1.exon1.amp1_4481	-0.54901088	0.037171344	0.586182224	0.15654056	0.624622499	0.744907619	0.152865047	0.914975982	FALSE
959	PF3D7_0729500.iso1.exon1.amp1_1884	-0.369899237	-0.265139922	0.104759315	0.641856271	0.553574551	0.428295523	0.032268051	0.933789205	FALSE
960	PF3D7_0729700.iso1.exon2.amp1_1872	-0.35247766	0.116049169	0.468526829	0.355023726	0.794113198	0.977038246	0.095641385	0.915060736	FALSE
961	PF3D7_0729800.iso1.exon1.amp1_365	-0.322822041	-0.530287751	-0.20746571	0.142558884	0.525079925	0.215915131	-0.069120059	0.904378076	FALSE
962	PF3D7_0729900.e1s1_5072	-0.574427419	-0.490291558	0.084135861	0.848874169	0.740744156	0.890865645	0.01847778	0.981270492	FALSE
963	PF3D7_0730000.iso1.exon1.amp1_348	-0.592290254	-0.466185305	0.126104949	0.743836032	0.797225457	0.758934104	0.026501695	0.960716829	FALSE
964	PF3D7_0730300.e1s1_5186	-0.577496398	-0.802425361	-0.224928962	0.253836019	0.653436411	0.327855507	-0.059915501	0.915060736	FALSE
965	PF3D7_0730300.e1s2_5758	-0.181146974	-0.292923558	-0.111776584	0.633193961	0.704779708	0.422358096	-0.027427539	0.933789205	FALSE
966	PF3D7_0730500.e1s3_7387	-0.226869595	-0.288156927	-0.061287332	0.790030611	0.649463757	0.42656474	-0.016249368	0.969245152	FALSE
967	PF3D7_0730800.1.e2s1_5161	-0.787548448	-0.458595079	0.328953368	0.497345037	0.78900748	0.955344569	0.067754497	0.926395115	FALSE
968	PF3D7_0730800.iso2.exon2.amp1_1557	-0.870014301	-0.582568135	0.287446166	0.61264454	0.731347097	1.148075551	0.060750221	0.933789205	FALSE
969	PF3D7_0730900.e1s1_8316	-0.293976769	-0.483846372	-0.189869604	0.573178895	0.44432858	0.678179156	-0.066478247	0.933789205	FALSE
970	PF3D7_0730900.e2s1_8659	-0.541921174	-0.036867263	0.505053911	0.381800795	0.555822778	1.139423143	0.130061504	0.915060736	FALSE
971	PF3D7_0731100.2o2_6789	0.536462533	0.915281168	0.378818635	0.579225273	1.010007247	1.367525218	0.059803735	0.933789205	FALSE
972	PF3D7_0731200.2o2_8439	0.339449717	0.680346084	0.340896367	0.531808379	1.139991883	1.053722792	0.050247173	0.933789205	FALSE
973	PF3D7_0731500.s1 (renamed)_7684	-0.629810999	-0.491366005	0.138444993	0.56275237	0.734479804	0.426318353	0.032641113	0.933789205	FALSE
974	PF3D7_0731500.s2 (renamed)_7112	-0.362004661	0.211807258	0.573811919	0.568294484	0.832173514	2.04957428	0.091926556	0.933789205	FALSE
975	PF3D7_0731600.e1s1_6357	0.028218497	0.116575996	0.088357499	0.919382055	1.028770051	1.800024532	0.012911897	0.991368218	FALSE
976	PF3D7_0732000.iso1.exon2.amp1_690	1.037096399	1.571554353	0.534457955	0.502404158	1.278699602	1.573152243	0.067755274	0.926395115	FALSE
977	PF3D7_0732200.iso1.exon2.amp1_1297	0.465301526	1.542175029	1.076873503	0.043998941	1.201300728	0.852752511	0.153700025	0.822486865	FALSE
978	PF3D7_0732300.iso1.exon1.amp1_4175	-0.326531816	-0.911843893	-0.585312076	0.401406838	0.895635727	1.370837098	-0.101603811	0.915060736	FALSE
979	PF3D7_0732400.iso1.exon1.amp1_2443	-0.523035131	-0.336203749	0.186831382	0.579353176	0.728391938	0.651532403	0.043232566	0.933789205	FALSE
980	PF3D7_0732500.iso1.exon1.amp1_135	-0.707815792	-0.287897601	0.419918192	0.45034954	0.507168363	1.113310233	0.115627433	0.920899767	FALSE
981	PF3D7_0732700.iso1.exon2.amp1_712	1.007667479	2.028226323	1.020558844	0.174977147	1.312046781	1.360556205	0.129100511	0.914975982	FALSE
982	PF3D7_0732900.iso1.exon2.amp1_996	-0.001731599	0.515477579	0.517209178	0.417060063	0.770824769	1.258867083	0.102720291	0.917134742	FALSE
983	PF3D7_0733000.iso1.exon1.amp1_3621	0.59161022	1.865924151	1.274313931	0.072536478	1.039383607	1.187173798	0.200965613	0.862677656	FALSE
984	PF3D7_0733000.iso1.exon2.amp3_1942	-0.531309662	-0.171416261	0.359893401	0.398222225	0.446693694	0.841861896	0.118524232	0.915060736	FALSE
985	PF3D7_0800100.iso1.exon1.amp1_723	0.570472885	1.85311368	1.282640796	0.136544304	1.255514024	1.532758762	0.165810145	0.894556606	FALSE
986	PF3D7_0800100.iso1.exon2.amp1_3980	-0.561465994	-0.670128002	-0.108662008	0.423229039	0.345383934	0.25078205	-0.053869378	0.917134742	FALSE
987	PF3D7_0800100.iso1.exon2.amp2_4269	-0.669250176	-0.746518051	-0.077267875	0.761865568	0.578679223	0.495048965	-0.022593214	0.964416895	FALSE
988	PF3D7_0800200.e1s1_8827	-0.174271643	-0.409875556	-0.235603913	0.586727006	0.798178618	0.854098162	-0.048804508	0.933789205	FALSE
989	PF3D7_0800200.e1s2_5359	-1.007152116	-0.725430742	0.281721374	0.460621391	0.731002054	0.738848134	0.064154904	0.920899767	FALSE
990	PF3D7_0800200.e2s1_5745	1.516103338	2.304832805	0.788729467	0.106818402	1.262287604	0.822680149	0.10763684	0.881162544	FALSE
991	PF3D7_0800300.e1s3_8831	-0.581451446	-0.912200895	-0.330749449	0.125726663	0.602287207	0.362615083	-0.09495065	0.881162544	FALSE
992	PF3D7_0800300.e2s1_8914	1.79546333	3.25619301	1.46072968	0.000222575	1.198246272	0.471088054	0.213448626	0.089157384	FALSE
993	PF3D7_0800400.iso1.exon3.amp1_128	-0.185871923	0.229118384	0.414990307	0.343073043	0.749428701	0.8373539	0.091042481	0.915060736	FALSE
994	PF3D7_0800500.iso1.exon2.amp1_3888	0.065365192	0.27835688	0.212991688	0.766467182	0.894946114	1.467905151	0.036394909	0.966343362	FALSE
995	PF3D7_0800700.e1s1_6606	-0.336509217	-0.14193133	0.194577887	0.603243965	0.34225716	0.764381547	0.078875467	0.933789205	FALSE
996	PF3D7_0800700.e3s1_5772	-0.501440414	0.00351064	0.504951054	0.441234639	0.871340048	1.295995682	0.090671575	0.919099687	FALSE
997	PF3D7_0801000.e2s1_5460	0.191689571	0.470993505	0.279303934	0.727673363	1.24514219	1.619274821	0.036027872	0.957663815	FALSE
998	PF3D7_0801000.e2s2_6911	0.435091004	1.273123379	0.838032375	0.261584263	1.044024271	1.41142322	0.128025163	0.915060736	FALSE
999	PF3D7_0801600.1o1_8124	-0.384491234	-0.689423203	-0.304931969	0.102116232	0.587863754	0.300000236	-0.090239144	0.878324893	FALSE
1000	PF3D7_0801700.1o3_5645	-0.682732841	-0.352474749	0.330258093	0.389488234	0.462260748	0.754129169	0.109402797	0.915060736	FALSE
1001	PF3D7_0801800_4835	-0.684883503	-0.645546182	0.039337322	0.870009798	0.585401102	0.462432433	0.011441072	0.985408067	FALSE
1002	PF3D7_0801900.iso1.exon1.amp5_1622	-0.821746001	-0.863556259	-0.041810257	0.894931551	0.863742116	0.593711919	-0.008315023	0.987948059	FALSE
1003	PF3D7_0802000.e1s1_5197	-0.158327712	0.110940485	0.269268197	0.331476832	0.654023028	0.511583305	0.070147749	0.915060736	FALSE
1004	PF3D7_0802000.e1s2_6642	-0.650574495	-0.209270478	0.441304017	0.302696027	0.511625268	0.824112015	0.132499381	0.915060736	FALSE
1005	PF3D7_0802300.iso1.exon1.amp1_1413	-0.547200692	-0.079456826	0.467743866	0.391057741	0.647082365	1.07246833	0.110249352	0.915060736	FALSE
1006	PF3D7_0802300.iso1.exon1.amp2_1927	-0.602093152	-0.418616824	0.183476328	0.641844371	0.774651831	0.775710863	0.03946901	0.933789205	FALSE
1007	PF3D7_0802600.iso1.exon3.amp1_1656	-0.797337268	-0.511509074	0.285828194	0.303153964	0.567292593	0.518340179	0.084755528	0.915060736	FALSE
1008	PF3D7_0802600.iso1.exon6.amp1_2681	-0.341303052	-0.480402136	-0.139099084	0.428292545	0.431533499	0.326985447	-0.055040724	0.917134742	FALSE
1009	PF3D7_0802800.2o2_8482	-0.692949168	-0.602724266	0.090224902	0.733327761	0.608662671	0.512405219	0.025115546	0.957663815	FALSE
1010	PF3D7_0803200.iso1.exon1.amp1_3327	-0.783916753	-0.643863474	0.140053279	0.257377692	0.421240913	0.203387797	0.057936251	0.915060736	FALSE
1011	PF3D7_0803400.iso1.exon1.amp1_4581	0.999946041	1.10360628	0.103660239	0.89832442	1.094899686	1.662105529	0.014746717	0.988767131	FALSE
1012	PF3D7_0803400.iso1.exon1.amp2_3948	0.833880216	1.220653339	0.386773123	0.509461648	1.029160122	1.150790303	0.061782376	0.926395115	FALSE
1013	PF3D7_0804000.iso1.exon1.amp1_4456	0.023596603	0.307292322	0.283695719	0.545276318	0.900387938	0.916703047	0.052407247	0.933789205	FALSE
1014	PF3D7_0804000.iso1.exon2.amp1_3276	-0.477047658	-0.348808323	0.128239335	0.31659891	0.349714684	0.229103391	0.063151669	0.915060736	FALSE
1015	PF3D7_0804500.e1s1_5404	-0.662627028	-0.61995273	0.042674299	0.850137075	0.594017885	0.427107061	0.012308186	0.981270492	FALSE
1016	PF3D7_0804500.e2s2_5372	-0.542733782	-0.04347417	0.499259611	0.194091814	0.398901634	0.712045007	0.18710607	0.914975982	FALSE
1017	PF3D7_0804500.e2s3_4800	-0.568288565	-0.402838203	0.165450363	0.565210978	0.357790734	0.579817025	0.070928397	0.933789205	FALSE
1018	PF3D7_0804500.e3_7398	-0.743025943	-0.163001164	0.580024779	0.232626444	0.558388623	0.914187951	0.158922889	0.915060736	FALSE
1019	PF3D7_0804600.1o1_6746	-0.552585978	-0.836922178	-0.2843362	0.269089799	0.973313354	0.399920278	-0.051105734	0.915060736	FALSE
1020	PF3D7_0804800.e1s1_5442	-0.434180985	-0.591270121	-0.157089137	0.256359906	0.412457474	0.239024761	-0.065957228	0.915060736	FALSE
1021	PF3D7_0804900.1o1_6159	-0.275628629	-0.408311899	-0.132683271	0.47208284	0.917922943	0.196161655	-0.025479968	0.921428022	FALSE
1022	PF3D7_0805100.iso1.exon1.amp1_3626	-0.541978287	-0.357942569	0.184035718	0.456738382	0.358689963	0.487971928	0.081736855	0.920899767	FALSE
1023	PF3D7_0805300.iso1.exon1.amp2_1057	-0.612408427	-0.574238613	0.038169813	0.824982539	0.374607658	0.338230674	0.017159195	0.979585743	FALSE
1024	PF3D7_0805400.1o6_8716	-0.474909948	-0.485416427	-0.010506479	0.971940326	0.387215955	0.613756059	-0.004184306	0.998686155	FALSE
1025	PF3D7_0805700.iso1.exon1.amp2_3399	-0.542258345	-0.531374963	0.010883383	0.964458135	0.615329278	0.467195045	0.003019756	0.997911665	FALSE
1026	PF3D7_0806000.iso1.exon1.amp2_515	-0.801381538	-0.369663367	0.431718171	0.699188619	1.490970781	2.271066555	0.04506689	0.944376151	FALSE
1027	PF3D7_0806200.10o10_8244	-0.725311585	-0.680442268	0.044869317	0.902431461	0.39956214	0.756470367	0.016496756	0.988992794	FALSE
1028	PF3D7_0806300.iso1.exon1.amp1_485	-0.53350338	-0.723434804	-0.189931424	0.400098249	0.811299172	0.368918007	-0.040860111	0.915060736	FALSE
1029	PF3D7_0806300.iso1.exon2.amp1_3830	-0.44241738	-0.368011093	0.074406287	0.73571499	0.754572099	0.378510206	0.01716363	0.958555259	FALSE
1030	PF3D7_0806500.e1s1_5475	-0.446442256	-0.793130149	-0.346687893	0.131975182	1.062821033	0.277654952	-0.057419435	0.890517679	FALSE
1031	PF3D7_0806600.e2s1_5153	-0.445847643	-0.473818594	-0.027970951	0.910241856	0.321946637	0.509435227	-0.01340352	0.991159216	FALSE
1032	PF3D7_0806600.e3s1_8038	-0.450994606	-0.497070376	-0.046075771	0.902418011	1.039893147	0.702164081	-0.007618565	0.988992794	FALSE
1033	PF3D7_0806600.e5s1_5749	-0.295612242	-0.322636179	-0.027023937	0.835062015	0.601125632	0.166289249	-0.007909356	0.980022573	FALSE
1034	PF3D7_0806700.iso1.exon1.amp1_1804	-0.557235944	-0.769374965	-0.212139021	0.068643222	0.431556509	0.171609221	-0.086051345	0.862652712	FALSE
1035	PF3D7_0806700.iso1.exon3.amp3_1358	-0.468845574	-0.917417031	-0.448571457	0.011287913	0.844932378	0.175982007	-0.093596667	0.527521817	FALSE
1036	PF3D7_0806800.e1s1_8932	-0.33488108	0.408146089	0.743027169	0.094249633	0.679685607	0.761811726	0.179658959	0.875412376	FALSE
1037	PF3D7_0806900.iso1.exon1.amp1_704	-0.692731031	-0.567284427	0.125446604	0.669287187	0.431087785	0.592769648	0.046264511	0.936894427	FALSE
1038	PF3D7_0807100.iso1.exon1.amp2_3363	-0.722545455	-0.400544158	0.322001297	0.237863419	0.521720229	0.503061381	0.103269073	0.915060736	FALSE
1039	PF3D7_0807700.1o5_5328	-0.559538597	-0.707720683	-0.148182086	0.41515325	0.666260553	0.29429176	-0.038845825	0.917134742	FALSE
1040	PF3D7_0807700.5o5_5617	-0.399263509	-0.068145038	0.331118471	0.201569295	0.534442273	0.468957588	0.104605355	0.914975982	FALSE
1041	PF3D7_0807800.e2s1_6602	0.376999052	0.207823026	-0.169176026	0.673110122	1.032468102	0.756634967	-0.028040007	0.936977941	FALSE
1042	PF3D7_0808100.iso1.exon2.amp1_3829	-0.316807153	-0.629032087	-0.312224933	0.040862588	0.499292098	0.230493713	-0.10910107	0.809964087	FALSE
1043	PF3D7_0808100.iso1.exon3.amp1_3963	-0.1244045	-0.160531361	-0.036126861	0.93875623	0.804133717	0.94892648	-0.007329602	0.992371014	FALSE
1044	PF3D7_0808200.e1s1_9217	0.68950901	0.606213303	-0.083295707	0.774977607	0.931427556	0.516965872	-0.015512933	0.968147545	FALSE
1045	PF3D7_0808400.1o1_4673	-0.639235863	-0.802731414	-0.16349555	0.504235534	0.264061518	0.492063527	-0.091399396	0.926395115	FALSE
1046	PF3D7_0808600.e1s2_6520	-0.679257613	-0.337821463	0.34143615	0.333986453	0.676127069	0.668866065	0.084264757	0.915060736	FALSE
1047	PF3D7_0808600.e2s1_8343	0.491184822	1.767671021	1.276486199	0.006138427	1.004473744	0.64289465	0.219108302	0.410424048	FALSE
1048	PF3D7_0808700.iso1.exon1.amp1_3035	0.383585148	0.812036875	0.428451727	0.472215431	1.001395749	1.168100269	0.069921862	0.921428022	FALSE
1049	PF3D7_0808700.iso1.exon2.amp1_2238	-0.541549708	-0.825572859	-0.284023151	0.005199169	0.368082645	0.133852463	-0.135292374	0.40482314	FALSE
1050	PF3D7_0808800.iso1.exon1.amp1_3594	-0.263081068	0.313321779	0.576402847	0.207860093	0.713300262	0.844434842	0.131772741	0.914975982	FALSE
1051	PF3D7_0808900.iso1.exon1.amp1_4458	-0.184388148	-0.161691036	0.022697112	0.943195718	0.781072064	0.612649234	0.004950122	0.993135859	FALSE
1052	PF3D7_0809100.iso1.exon1.amp1_4184	0.026589455	1.214479741	1.187890286	0.041960516	0.92749251	0.927367221	0.213462301	0.813959796	FALSE
1053	PF3D7_0809100.iso1.exon2.amp1_1077	-0.455041299	-0.380711121	0.074330178	0.812009294	0.435387698	0.637633793	0.02680013	0.977199168	FALSE
1054	PF3D7_0809100.iso1.exon2.amp2_seg2_2600	-0.62000478	-0.241889739	0.378115041	0.318214306	0.43059287	0.733270461	0.132988569	0.915060736	FALSE
1055	PF3D7_0809200.e1s2_6342	-0.2677494	-0.180691596	0.087057804	0.791906879	0.740512271	0.642568599	0.019868628	0.969245152	FALSE
1056	PF3D7_0809500.iso1.exon1.amp1_3552	-0.492771834	-0.686800742	-0.194028907	0.193950059	0.523710325	0.238806896	-0.064658936	0.914975982	FALSE
1057	PF3D7_0809600.iso1.exon1.amp4_seg1_2308	-0.37865396	-0.46197797	-0.083324011	0.83081864	0.637892431	0.788026245	-0.021160936	0.980022573	FALSE
1058	PF3D7_0809900.iso1.exon1.amp1_seg2_287	-0.222833596	0.235426047	0.458259643	0.413827222	0.833902877	1.097347797	0.088079152	0.917134742	FALSE
1059	PF3D7_0809900.iso1.exon1.amp2_seg2_576	-0.278098072	0.057105638	0.335203709	0.531019454	0.812111716	1.063852141	0.06620916	0.933789205	FALSE
1060	PF3D7_0810300.2o4_8207	-0.530921565	-0.27402414	0.256897425	0.325192101	0.749144293	0.462187552	0.059227839	0.915060736	FALSE
1061	PF3D7_0810800.e2s1_9231	-0.189180977	0.162141473	0.35132245	0.389534778	0.572742806	0.79762054	0.097282696	0.915060736	FALSE
1062	PF3D7_0810900.1.1o2_7001	-0.469794178	-0.021464879	0.4483293	0.332758147	0.296436534	0.907222046	0.18146084	0.915060736	FALSE
1063	PF3D7_0811600.e2s1_6045	-0.504975071	-0.879816814	-0.374841743	0.035522766	0.62714516	0.260429909	-0.104537938	0.784297925	FALSE
1064	PF3D7_0811600.e2s2_7207	0.105253749	0.737829377	0.632575628	0.318955445	0.887642824	1.220523989	0.113300367	0.915060736	FALSE
1065	PF3D7_0812100.e1s1_5364	-0.291452242	-0.131379881	0.160072361	0.818053086	0.94951492	1.421505242	0.026339513	0.97901018	FALSE
1066	PF3D7_0812400.e1s1_6614	-0.339289212	-0.170174652	0.16911456	0.677537295	0.492472432	0.828938235	0.052166329	0.93820426	FALSE
1067	PF3D7_0812600.iso1.exon2.amp1_4140	-0.220452592	-0.322407631	-0.101955039	0.541113305	0.623668404	0.269270495	-0.028567892	0.933789205	FALSE
1068	PF3D7_0812700.1o1_7561	0.541784941	0.315290083	-0.226494858	0.442795703	0.658128505	0.559353667	-0.058264059	0.919099687	FALSE
1069	PF3D7_0812900.2o2_8824	-0.440287192	-0.605985912	-0.16569872	0.461498613	0.517874829	0.425542297	-0.054315586	0.920899767	FALSE
1070	PF3D7_0813400.e2s1_6043	-0.31335201	-0.261301194	0.052050816	0.854120185	0.710711599	0.541036368	0.012501805	0.984362104	FALSE
1071	PF3D7_0813700.iso1.exon1.amp2_2781	-0.899885039	-0.552944382	0.346940657	0.404717164	0.826083834	0.795981864	0.070276976	0.915831356	FALSE
1072	PF3D7_0813900.e2s1_8892	-0.504667061	-0.775978664	-0.271311603	0.216808519	0.524863713	0.392862521	-0.088338169	0.915060736	FALSE
1073	PF3D7_0814600.e1s1_5462	-0.657897232	-0.572386997	0.085510235	0.679416075	0.744234261	0.344904312	0.020043829	0.93820426	FALSE
1074	PF3D7_0815100.iso1.exon1.amp1_2474	-0.54505547	-0.813834001	-0.268778532	0.213453954	0.68532567	0.361907556	-0.068152542	0.915060736	FALSE
1075	PF3D7_0815300.iso1.exon1.amp1_4308	-0.322022961	-0.260673703	0.061349259	0.881879726	0.730090818	0.829997398	0.013782827	0.985408067	FALSE
1076	PF3D7_0815300.iso1.exon1.amp2_seg1_2595	-0.226200112	-0.176557451	0.049642661	0.882525573	0.709124934	0.661931699	0.011751898	0.985408067	FALSE
1077	PF3D7_0815400.e1s1_8889	-0.826798181	-0.855940487	-0.029142306	0.867793771	0.54958049	0.313619603	-0.009188692	0.985408067	FALSE
1078	PF3D7_0815500.3o5_7032	0.565310507	1.476337281	0.911026775	0.094909188	0.929843399	0.934864777	0.163195787	0.875412376	FALSE
1079	PF3D7_0816100.1o4_7264	-0.684380855	-0.692487343	-0.008106488	0.9724297	0.710081938	0.426405921	-0.001974129	0.998686155	FALSE
1080	PF3D7_0816200.1o1_6682	0.07531116	-0.105011524	-0.180322684	0.515598858	0.970315561	0.465155689	-0.032390112	0.926395115	FALSE
1081	PF3D7_0816500.e2s1_4845	-0.431094902	-0.561635125	-0.130540223	0.203919326	0.547204873	0.074292598	-0.042123035	0.914975982	FALSE
1082	PF3D7_0816600.e1s1_6325	-0.464965052	-0.458131554	0.006833498	0.931188757	0.397444702	0.083006064	0.003031172	0.992371014	FALSE
1083	PF3D7_0816700.iso1.exon3.amp1_4095	-0.299075093	-0.338421822	-0.039346729	0.865469657	0.774411149	0.405362151	-0.008831804	0.985408067	FALSE
1084	PF3D7_0817300.e1s3_7500	1.156886428	1.361121799	0.204235371	0.806956591	1.162955085	1.705043742	0.027562264	0.975839887	FALSE
1085	PF3D7_0817700.iso1.exon14.amp1_1790	-0.967743143	-1.104900635	-0.137157491	0.534398741	0.529853086	0.417959925	-0.044078215	0.933789205	FALSE
1086	PF3D7_0817700.iso1.exon15.amp1_2691	-0.421167812	-0.644869474	-0.223701662	0.1113713	0.569622173	0.198733737	-0.068901435	0.881162544	FALSE
1087	PF3D7_0818500.e2_5381	-0.332748455	-0.235836264	0.096912191	0.744865439	0.616888716	0.585507296	0.026328488	0.960748063	FALSE
1088	PF3D7_0818900_4784	0.561911279	0.354690218	-0.207221062	0.615487883	0.941724472	0.793412464	-0.037279954	0.933789205	FALSE
1089	PF3D7_0819600.2o2_6409	-0.633720341	-0.579277849	0.054442492	0.751646922	0.506044286	0.314372851	0.018575639	0.962376195	FALSE
1090	PF3D7_0819800.e4s1_8607	-0.354254081	0.034946764	0.389200844	0.423926197	0.771460332	0.950610534	0.0817615	0.917134742	FALSE
1091	PF3D7_0820600.3o3_6147	-0.530944556	-0.776753845	-0.245809289	0.084645969	0.352017777	0.237141915	-0.120081775	0.866049105	FALSE
1092	PF3D7_0821000.1o5_7907	-0.154079006	-0.125343137	0.028735868	0.932653095	0.759561125	0.664924865	0.006388848	0.992371014	FALSE
1093	PF3D7_0821300.iso1.exon1.amp1_3317	-0.58864787	0.035279797	0.623927666	0.400738325	0.784875201	1.467749678	0.117222314	0.915060736	FALSE
1094	PF3D7_0821300.iso1.exon3.amp1_3898	-0.150974145	-0.244529134	-0.093554989	0.786111008	0.905284551	0.650970554	-0.017705437	0.969245152	FALSE
1095	PF3D7_0821500.1o1_8442	0.341321741	0.341743464	0.000421723	0.999453552	1.078026832	1.240599093	6.41E-05	0.999858995	FALSE
1096	PF3D7_0821600.1o1_4738	-0.421292819	-0.486829188	-0.065536369	0.630048989	0.485051772	0.22746756	-0.023562996	0.933789205	FALSE
1097	PF3D7_0822600.e2s1_7209	-1.157819574	-1.312945037	-0.155125463	0.581096343	1.052042068	0.454577294	-0.025767097	0.933789205	FALSE
1098	PF3D7_0823300 (renamed, has duplicates)_6432	0.867943475	0.897474341	0.029530866	0.960805327	1.55059998	1.143347963	0.003257793	0.996761306	FALSE
1099	PF3D7_0823300.e1s1_7488	-0.47939044	-0.298640997	0.180749443	0.685582936	0.757413296	0.893091876	0.038937942	0.939416436	FALSE
1100	PF3D7_0823300.e1s2_7199	0.117766104	0.416234452	0.298468348	0.507042451	0.983974524	0.861917529	0.051221414	0.926395115	FALSE
1101	PF3D7_0823500.1o1_5877	0.245529424	0.700469856	0.454940433	0.397820615	0.690957669	1.056684578	0.10238554	0.915060736	FALSE
1102	PF3D7_0823800_6524	-0.90107911	-0.625555703	0.275523407	0.230208819	0.511208076	0.416257714	0.091557946	0.915060736	FALSE
1103	PF3D7_0823900.1o1_8440	0.103987534	-0.124188454	-0.228175988	0.494956539	0.808891871	0.629525604	-0.04807915	0.926395115	FALSE
1104	PF3D7_0824200.iso1.exon2.amp1_seg1_3174	-0.420562352	-0.549436853	-0.128874501	0.387086663	0.483784417	0.255476255	-0.046291331	0.915060736	FALSE
1105	PF3D7_0824200.iso1.exon2.amp2_seg1_3463	-0.08663677	-0.158492504	-0.071855733	0.722226836	0.803310671	0.31387853	-0.015663829	0.95750546	FALSE
1106	PF3D7_0824600.1o5_8431	-0.364417916	-0.603620962	-0.239203047	0.075170957	0.610034546	0.163043738	-0.069009194	0.862677656	FALSE
1107	PF3D7_0824700.iso1.exon16.amp1_3245	-0.207468189	-0.041102206	0.166365983	0.611441533	0.744166136	0.630013772	0.037860613	0.933789205	FALSE
1108	PF3D7_0825200.iso1.exon1.amp1_2065	-0.511631589	-0.671935838	-0.160304249	0.251509391	0.528930905	0.2166031	-0.053023235	0.915060736	FALSE
1109	PF3D7_0825200.iso1.exon4.amp1_4086	-0.55047873	-0.416740424	0.133738306	0.664827235	0.355911444	0.62969101	0.056316094	0.936301139	FALSE
1110	PF3D7_0825600.iso1.exon1.amp1_3549	-0.472817574	-0.079735641	0.393081934	0.293504611	0.455264219	0.717929565	0.133311795	0.915060736	FALSE
1111	PF3D7_0825800.iso1.exon1.amp1_1307	0.175189509	0.515843641	0.340654132	0.414951487	0.70464876	0.811545113	0.079150483	0.917134742	FALSE
1112	PF3D7_0826000.iso1.exon1.amp2_3371	-0.366379084	-0.370479023	-0.004099938	0.988942569	0.61340467	0.585016697	-0.001119622	0.998822427	FALSE
1113	PF3D7_0826100.s1_5414	-0.805976064	-0.781196218	0.024779846	0.913478249	0.589208319	0.433608491	0.007195	0.991159216	FALSE
1114	PF3D7_0826100.s2_5703	-0.142039862	-0.131073067	0.010966796	0.985341399	0.931351097	1.213611912	0.001890583	0.998822427	FALSE
1115	PF3D7_0826100.s3_8299	-0.293269974	-0.905849502	-0.612579527	0.072115756	0.666561473	0.567818114	-0.155558207	0.862677656	FALSE
1116	PF3D7_0826100.s4_8588	0.447573347	-0.029101792	-0.476675138	0.338198377	0.984727093	0.939860558	-0.081080158	0.915060736	FALSE
1117	PF3D7_0826100.s8_8594	-0.499392177	-0.416063168	0.083329009	0.778917854	0.610015389	0.58507226	0.022868917	0.968889936	FALSE
1118	PF3D7_0826300.1o1_6730	0.38142161	0.876512037	0.495090428	0.445783015	0.80832514	1.287702663	0.094339436	0.919099687	FALSE
1119	PF3D7_0826400.iso1.exon6.amp1_665	-0.356596465	0.4435096	0.800106064	0.007333426	0.62047412	0.415655441	0.221818244	0.44702013	FALSE
1120	PF3D7_0826500.e1s1_5469	-0.55640796	0.001835673	0.558243634	0.297334376	0.636339588	1.029551166	0.134613882	0.915060736	FALSE
1121	PF3D7_0826500.e1s2_5180	-0.17566877	-0.401607193	-0.225938423	0.425845167	0.928257554	0.487185597	-0.042305384	0.917134742	FALSE
1122	PF3D7_0826700.e2_6241	-0.100172266	-0.255528431	-0.155356165	0.616702367	0.902248347	0.565398912	-0.02971814	0.933789205	FALSE
1123	PF3D7_0827100.s2_5089	-0.347739203	-0.221491513	0.12624769	0.595064378	1.011793433	0.341938918	0.021901729	0.933789205	FALSE
1124	PF3D7_0827600.2o2_6223	1.356050752	1.77074287	0.414692119	0.473631664	1.256207532	1.105497594	0.055721714	0.921752019	FALSE
1125	PF3D7_0827800.e1s1_6935	-0.40762506	-0.579591035	-0.171965975	0.325774261	0.494996921	0.310955345	-0.059952767	0.915060736	FALSE
1126	PF3D7_0827800.e1s3_6929	-0.458950313	-0.352723155	0.106227158	0.688165752	0.648277301	0.505066799	0.027926679	0.941190032	FALSE
1127	PF3D7_0827900.e2_7119	-0.194103661	0.107694923	0.301798584	0.213623364	0.674274426	0.421954113	0.077255212	0.915060736	FALSE
1128	PF3D7_0828100.iso1.exon3.amp1_1012	-0.355962921	-0.389528102	-0.033565181	0.869922379	0.58247995	0.37987028	-0.009926245	0.985408067	FALSE
1129	PF3D7_0828200.iso1.exon1.amp2_1624	-0.29997036	0.523828746	0.823799106	0.077477429	0.881159154	0.783395581	0.15766393	0.862677656	FALSE
1130	PF3D7_0828400.1o1_8192	-0.048137546	-0.089588731	-0.041451185	0.919628763	0.737084214	0.82528235	-0.009243441	0.991368218	FALSE
1131	PF3D7_0828500.4o4_8157	-1.010387098	-0.864279073	0.146108025	0.68193868	0.610119828	0.712503878	0.039129414	0.93820426	FALSE
1132	PF3D7_0829000.e2s1_7406	-0.876996738	-0.488636088	0.38836065	0.466171069	0.502050558	1.068621907	0.10926279	0.921428022	FALSE
1133	PF3D7_0829600.1o1_8708	-0.664691917	-0.51318608	0.151505837	0.79689286	0.577442857	1.216320345	0.037199285	0.971516339	FALSE
1134	PF3D7_0830600.2o2_6153	-0.289609583	-0.155051969	0.134557614	0.56043766	0.642251602	0.424723444	0.036063739	0.933789205	FALSE
1135	PF3D7_0830800.iso1.exon1.amp1_1373	-0.07229459	0.757223278	0.829517869	0.01564503	0.705777399	0.505305262	0.201417446	0.609108571	FALSE
1136	PF3D7_0830800.iso1.exon1.amp2_4505	-0.53763875	0.282078324	0.819717074	0.045820013	0.622878507	0.656646949	0.217991164	0.830402251	FALSE
1137	PF3D7_0830800.iso1.exon2.amp1_1892	-0.448462427	0.494428062	0.942890489	0.231476501	0.573653234	1.490543667	0.213976438	0.915060736	FALSE
1138	PF3D7_0831100.iso1.exon1.amp2_3348	-0.744241931	-0.485201331	0.2590406	0.341888348	0.612871867	0.507436769	0.071708406	0.915060736	FALSE
1139	PF3D7_0831100.iso1.exon2.amp1_4116	0.193219104	-0.286643485	-0.479862589	0.021949309	0.934343186	0.246762152	-0.090396254	0.683842929	FALSE
1140	PF3D7_0831200.iso1.exon1.amp1_2190	-0.045238326	-0.225625927	-0.180387601	0.288584508	0.76649311	0.220726332	-0.041388923	0.915060736	FALSE
1141	PF3D7_0831300.2o2_7356	-0.383270466	-0.046295425	0.336975041	0.51273259	1.180453644	0.979985684	0.048420476	0.926395115	FALSE
1142	PF3D7_0831400.2o2_8450	-0.061523027	-0.341258645	-0.279735617	0.433231893	0.832295789	0.671129519	-0.057138207	0.917134742	FALSE
1143	PF3D7_0831500.iso1.exon2.amp1_2951	0.498496828	1.147485872	0.648989044	0.178072401	0.907496919	0.868901265	0.119745426	0.914975982	FALSE
1144	PF3D7_0831500.iso1.exon3.amp1_1846	-0.714480847	-0.719234576	-0.004753729	0.988570664	0.859526197	0.630921646	-0.000946339	0.998822427	FALSE
1145	PF3D7_0831700.2o2_5026	-0.386058678	0.361885845	0.747944523	0.360015425	1.20792538	1.582628205	0.099321066	0.915060736	FALSE
1146	PF3D7_0831800.2o2_5849	-0.323874984	-0.000281088	0.323593895	0.632265778	1.057468882	1.355478028	0.04927148	0.933789205	FALSE
1147	PF3D7_0832000.iso1.exon3.amp1_1848	-0.627040829	-0.280832904	0.346207925	0.316496822	0.590120922	0.657239722	0.096498454	0.915060736	FALSE
1148	PF3D7_0832300.2o2_7858	-0.310253671	-0.313953664	-0.003699993	0.98281062	0.644070329	0.280337276	-0.001003715	0.998822427	FALSE
1149	PF3D7_0832400.iso1.exon3.amp1_1853	0.008219904	0.329290362	0.321070458	0.689148698	0.909596825	1.641298095	0.052605413	0.941702216	FALSE
1150	PF3D7_0832800.iso1.exon3.amp1_1854	0.705267423	1.440112345	0.734844922	0.286984879	0.970934007	1.315082234	0.120669923	0.915060736	FALSE
1151	PF3D7_0832900.iso1.exon3.amp1_986	0.758090565	1.463369006	0.705278441	0.367438231	1.256311213	1.511124594	0.09132532	0.915060736	FALSE
1152	PF3D7_0833000.iso1.exon3.amp1_3881	0.53472463	0.974277805	0.439553174	0.628593041	1.30565555	1.830378546	0.053322197	0.933789205	FALSE
1153	PF3D7_0833100.iso1.exon3.amp1_4170	-0.18929863	0.345372499	0.534671129	0.564417065	0.986945777	1.87956695	0.079438768	0.933789205	FALSE
1154	PF3D7_0833200.iso1.exon3.amp1_3030	-0.193191592	0.699250926	0.892442518	0.220323415	0.819473563	1.363384218	0.165938713	0.915060736	FALSE
1155	PF3D7_0833300.iso1.exon1.amp1_1870	0.876297665	0.870957396	-0.005340269	0.991521345	1.204974403	0.971014235	-0.000753465	0.998822427	FALSE
1156	PF3D7_0833400.iso1.exon3.amp1_4185	-0.128774805	-0.051736533	0.077038272	0.849340484	0.791148433	0.806401555	0.01619422	0.981270492	FALSE
1157	PF3D7_0833500.iso1.exon3.amp1_3614	0.732194148	1.942718319	1.21052417	0.056087613	1.149309456	1.034779215	0.1774202	0.837609343	FALSE
1158	PF3D7_0900100.iso1.exon2.amp1_151	0.906516172	2.388735471	1.482219299	0.016292134	1.195261532	0.908530556	0.21170562	0.609108571	FALSE
1159	PF3D7_0900200.e2s1_8924	0.138681304	0.666172816	0.527491512	0.443299248	1.077681482	1.349074106	0.079123482	0.919099687	FALSE
1160	PF3D7_0900300.iso1.exon1.amp1_1001	-0.314368564	0.749269514	1.063638078	0.199533221	0.768497556	1.541839342	0.199560354	0.914975982	FALSE
1161	PF3D7_0900400.iso1.exon2.amp1_1867	-0.385427328	0.259668099	0.645095427	0.279998394	0.615052614	1.145304616	0.154862823	0.915060736	FALSE
1162	PF3D7_0900500.iso1.exon1.amp1_4464	0.420094232	2.279761034	1.859666801	0.070166833	1.183878855	1.709523103	0.247318664	0.862652712	FALSE
1163	PF3D7_0900600.iso1.exon1.amp1_424	-0.123283689	0.366550002	0.489833691	0.51509192	1.016405396	1.502410467	0.075504364	0.926395115	FALSE
1164	PF3D7_0900700.iso1.exon1.amp1_2726	-0.454471422	0.043197279	0.497668701	0.406320203	0.673975771	1.184070933	0.110883962	0.915831356	FALSE
1165	PF3D7_0900900.iso1.exon1.amp1_4454	0.709101769	1.499376212	0.790274444	0.321810224	1.296812004	1.52347281	0.099487114	0.915060736	FALSE
1166	PF3D7_0901000.iso1.exon1.amp1_3010	1.133086401	2.197894893	1.064808493	0.236876571	1.258370262	1.687347829	0.135164955	0.915060736	FALSE
1167	PF3D7_0901100.iso1.exon1.amp1_3608	-0.158948043	0.029172586	0.188120629	0.621518877	0.668642503	0.756474887	0.04617842	0.933789205	FALSE
1168	PF3D7_0901300.iso1.exon2.amp1_1859	-0.323916983	0.569777146	0.893694129	0.320701846	1.038697813	1.742524147	0.130818553	0.915060736	FALSE
1169	PF3D7_0901400.iso1.exon2.amp1_711	-0.592646255	-0.370369759	0.222276496	0.515163851	0.533777374	0.67650945	0.067177718	0.926395115	FALSE
1170	PF3D7_0901500.iso1.exon2.amp1_4476	0.273356013	1.095643756	0.822287743	0.290538214	1.030186539	1.487347934	0.125675795	0.915060736	FALSE
1171	PF3D7_0901600.iso1.exon2.amp1_1269	0.363680753	0.575249803	0.211569051	0.822896388	1.225342287	1.936290743	0.026645949	0.979585743	FALSE
1172	PF3D7_0901800.2o2_8725	0.737181387	1.280380406	0.543199019	0.454056513	1.103555887	1.427451661	0.079131746	0.920899767	FALSE
1173	PF3D7_0902200.2o3_7910	0.165191571	0.479061467	0.313869897	0.594016181	1.108783299	1.158606463	0.046940307	0.933789205	FALSE
1174	PF3D7_0902300.2o3_7037	-0.085533041	-0.169173958	-0.083640917	0.832890104	0.807280567	0.783774553	-0.017323358	0.980022573	FALSE
1175	PF3D7_0902400.iso1.exon2.amp1_1014	-0.530437673	-0.450413076	0.080024598	0.724242981	0.73378316	0.399715766	0.01893094	0.957663815	FALSE
1176	PF3D7_0902600.2o3_8194	-0.540000648	0.266489191	0.806489838	0.180469377	0.766265659	1.10350772	0.1658022	0.914975982	FALSE
1177	PF3D7_0902800.2o4_7652	-0.235550506	0.065638887	0.301189392	0.553921135	0.928590348	1.000378117	0.053582591	0.933789205	FALSE
1178	PF3D7_0902800.4o4_7941	-0.046175001	0.442732106	0.488907108	0.253651982	0.881281536	0.788658009	0.093501702	0.915060736	FALSE
1179	PF3D7_0902900.1o1_8123	-0.094626565	0.269177839	0.363804403	0.436070015	0.694837885	0.917503286	0.083867677	0.917134742	FALSE
1180	PF3D7_0903000.1o1_9002	-0.009559079	0.103064423	0.112623503	0.803597524	0.792155349	0.909091664	0.023288955	0.975028076	FALSE
1181	PF3D7_0903000_5973	0.042909361	0.180252952	0.137343591	0.70654667	0.770804396	0.713871352	0.029934565	0.948375713	FALSE
1182	PF3D7_0903300.iso1.exon1.amp3_3123	-0.503282534	-0.37297144	0.130311094	0.665992803	0.495181431	0.604672829	0.042709879	0.936894427	FALSE
1183	PF3D7_0903300.iso1.exon1.amp4_1038	0.208671962	0.207288651	-0.001383311	0.996444942	0.980399826	0.555534304	-0.000244566	0.99965353	FALSE
1184	PF3D7_0903400.e1s3_8886	-0.210372511	-0.348318065	-0.137945554	0.518604011	0.753029925	0.357084842	-0.031937516	0.927464915	FALSE
1185	PF3D7_0903500.e1s1_7220	1.233301481	2.21343686	0.980135379	0.006916835	1.051479531	0.50783346	0.162431151	0.43099566	FALSE
1186	PF3D7_0903500.e1s2_7214	1.097207145	1.175845822	0.078638676	0.819189158	1.144043471	0.600607579	0.011947131	0.979201671	FALSE
1187	PF3D7_0903700.e3s1_4884	0.265308605	0.165551493	-0.099757112	0.647413157	0.785034177	0.362898506	-0.022169507	0.933789205	FALSE
1188	PF3D7_0903800.iso1.exon2.amp1_1662	-0.848073411	-0.93557392	-0.087500508	0.563586611	0.455297766	0.272049867	-0.03323985	0.933789205	FALSE
1189	PF3D7_0903800.iso1.exon2.amp2_3644	-0.210040832	-0.176814187	0.033226645	0.905015051	0.650387895	0.54020774	0.008665169	0.989727848	FALSE
1190	PF3D7_0904900.e1s1_8018	-0.350520011	-0.176382023	0.174137988	0.672515084	0.605489745	0.831598801	0.045734035	0.936977941	FALSE
1191	PF3D7_0904900.e1s3_6567	-0.661031938	-0.12276547	0.538266468	0.203824338	0.47703507	0.787249087	0.172285691	0.914975982	FALSE
1192	PF3D7_0905100.iso1.exon2.amp1_4406	-0.109902979	-0.649309368	-0.539406389	0.007905969	0.688052954	0.278869023	-0.137184663	0.450767168	FALSE
1193	PF3D7_0905100.iso1.exon3.amp1_1647	0.691114706	0.950164001	0.259049295	0.631633063	1.404864742	1.014660513	0.03158321	0.933789205	FALSE
1194	PF3D7_0905300.s5_9157	-0.588722317	0.242432167	0.831154485	0.157503641	0.894119868	1.059041477	0.151573935	0.914975982	FALSE
1195	PF3D7_0905300.s6_8296	0.260498249	-0.187492927	-0.447991176	0.400823546	1.024290954	1.021978028	-0.072912794	0.915060736	FALSE
1196	PF3D7_0905300.s7_8001	-0.577349317	-0.038792297	0.53855702	0.307558692	0.623844872	1.017602754	0.132199953	0.915060736	FALSE
1197	PF3D7_0905400.e7s1_7466	0.383648899	-0.117517413	-0.501166312	0.280174733	1.012370855	0.85541806	-0.08385024	0.915060736	FALSE
1198	PF3D7_0905600.2o2_5648	-0.649707732	-0.401814809	0.247892923	0.568064096	0.491022695	0.878396069	0.075425744	0.933789205	FALSE
1199	PF3D7_0905900.iso1.exon1.amp1_3487	-0.368337685	-0.352387	0.015950685	0.926441008	0.253260208	0.352524827	0.009989493	0.99230528	FALSE
1200	PF3D7_0905900.iso1.exon1.amp2_seg1_1439	-0.250807167	-0.088925015	0.161882152	0.636886203	0.741484636	0.665952028	0.036784225	0.933789205	FALSE
1201	PF3D7_0906200.1o1_7631	-0.450498943	-0.467239604	-0.01674066	0.953338222	0.753380681	0.541718745	-0.003807009	0.99537408	FALSE
1202	PF3D7_0906300.1o1_4700	0.108798154	-0.232208297	-0.341006451	0.442833177	0.842883541	0.858416229	-0.067289637	0.919099687	FALSE
1203	PF3D7_0906400.e1s1_9120	-0.685586339	-0.752241835	-0.066655495	0.776273749	0.442670661	0.466885097	-0.02494072	0.968147545	FALSE
1204	PF3D7_0906500.1o1_4999	1.21354607	1.658403473	0.444857403	0.549695128	1.241355008	1.472178068	0.0584227	0.933789205	FALSE
1205	PF3D7_0906900.1o2_5563	-0.427482572	-0.520975714	-0.093493142	0.517190836	0.423718605	0.260151656	-0.038117898	0.926395115	FALSE
1206	PF3D7_0907200.e1s2_8934	-0.111817179	-0.073241663	0.038575516	0.917632897	0.704254522	0.745491677	0.009068634	0.991159216	FALSE
1207	PF3D7_0907600.iso1.exon2.amp1_4206	-0.598587023	-0.070741699	0.527845324	0.345529027	0.631309571	1.090979104	0.12612657	0.915060736	FALSE
1208	PF3D7_0907700.e1s1_8630	-0.025680946	0.878882671	0.904563617	0.013478571	0.909712437	0.535854004	0.172084087	0.55579286	FALSE
1209	PF3D7_0908200.iso1.exon2.amp1_4259	-0.847093582	-0.603454845	0.243638737	0.466030996	0.427210547	0.664290849	0.088345605	0.921428022	FALSE
1210	PF3D7_0908300.iso2.exon2.amp1_3507	-0.250202695	0.54956032	0.799763015	0.178843168	0.452776968	1.095703385	0.237260049	0.914975982	FALSE
1211	PF3D7_0908400.2o2_5815	-0.423209068	-0.682444479	-0.259235411	0.182991323	0.484905911	0.341906914	-0.091700102	0.914975982	FALSE
1212	PF3D7_0908500.e15s1_7738	0.021594749	-0.380987755	-0.402582503	0.16813858	0.803153389	0.501221456	-0.086528547	0.914975982	FALSE
1213	PF3D7_0908500.e17s1_8622	-0.514929118	-0.549316223	-0.034387105	0.892086972	0.351766482	0.518495953	-0.015324805	0.987698579	FALSE
1214	PF3D7_0908500.e4s1_8616	-0.693754144	-0.768381874	-0.074627729	0.738423775	0.330202554	0.452855105	-0.035949455	0.95902745	FALSE
1215	PF3D7_0908700.iso1.exon6.amp1_4386	-0.519091026	-0.846396927	-0.327305901	0.029267596	0.727868668	0.150382057	-0.079281208	0.746057625	FALSE
1216	PF3D7_0909100.1o1_4745	-0.444588696	-0.019793493	0.424795202	0.195357396	0.558961027	0.599574659	0.125615534	0.914975982	FALSE
1217	PF3D7_0909500_5686	1.181772216	2.488142772	1.306370556	0.015993449	1.260500394	0.80277116	0.178734773	0.609108571	FALSE
1218	PF3D7_0909600.3o3_8193	-0.412689385	-0.484760643	-0.072071258	0.711083678	0.412511433	0.380694404	-0.029361825	0.949918357	FALSE
1219	PF3D7_0909700.iso1.exon1.amp1_1703	0.676742449	0.641097507	-0.035644943	0.926380957	0.903266206	0.748330181	-0.006694731	0.99230528	FALSE
1220	PF3D7_0909900.iso1.exon1.amp1_1689	-0.172374527	-0.145707482	0.026667045	0.951702645	0.76976577	0.886943657	0.005671537	0.99537408	FALSE
1221	PF3D7_0909900.iso1.exon1.amp2_2197	-0.426847871	-0.06513568	0.361712191	0.514038184	0.504502488	1.120100074	0.099696978	0.926395115	FALSE
1222	PF3D7_0910000.iso1.exon1.amp2_1355	-0.520855223	-0.640783495	-0.119928272	0.425866962	0.482951867	0.260739406	-0.043119305	0.917134742	FALSE
1223	PF3D7_0910200.iso1.exon1.amp1_1395	-0.086261076	0.297234866	0.383495941	0.471131759	0.985073072	1.034559447	0.064516403	0.921428022	FALSE
1224	PF3D7_0910400.iso1.exon1.amp2_seg1_2878	-0.570220621	-0.539453698	0.030766923	0.921204605	0.622873793	0.617488737	0.008240405	0.991957647	FALSE
1225	PF3D7_0910400.iso1.exon1.amp2_seg2_864	-0.310456223	-0.370142341	-0.059686118	0.844412241	0.651931018	0.597380465	-0.015396575	0.981270492	FALSE
1226	PF3D7_0910900.iso1.exon2.amp1_3342	-0.363920888	0.25088021	0.614801098	0.350059033	0.679325486	1.286856441	0.13292738	0.915060736	FALSE
1227	PF3D7_0911100.e1s1_9127	-0.557010895	-0.9526885	-0.395677606	0.112519522	0.725064643	0.411880855	-0.094580762	0.881162544	FALSE
1228	PF3D7_0911300.e1s2_8013	-0.348276939	-0.404792914	-0.056515975	0.788187608	0.64291099	0.379908966	-0.015211369	0.969245152	FALSE
1229	PF3D7_0911900.2o2_4716	1.420456052	2.30581796	0.885361908	0.129536118	1.14461885	1.022906612	0.130383372	0.883745191	FALSE
1230	PF3D7_0911900.e2_7125	0.289747125	0.855265328	0.565518203	0.393792117	0.917605088	1.297387977	0.097449803	0.915060736	FALSE
1231	PF3D7_0912500.2o7_6421	-0.417512274	-0.48947421	-0.071961936	0.653415105	0.553809171	0.272880343	-0.022629538	0.933789205	FALSE
1232	PF3D7_0912600.iso1.exon1.amp1_741	-0.30308983	-0.421048974	-0.117959144	0.549601562	0.74260152	0.316691983	-0.027766394	0.933789205	FALSE
1233	PF3D7_0912600.iso1.exon2.amp1_4466	-1.074607058	-0.790165816	0.284441243	0.171344864	0.703152902	0.335775313	0.070512284	0.914975982	FALSE
1234	PF3D7_0912800.1o1_8778	-0.465295729	0.440829197	0.906124926	0.052907494	0.73140596	0.759754231	0.205579646	0.830402251	FALSE
1235	PF3D7_0912900.e2s1_6018	-0.404886861	0.091099514	0.495986374	0.302900943	0.337910662	0.934810576	0.185496703	0.915060736	FALSE
1236	PF3D7_0913500.3o3_7012	-0.512280275	-0.473274192	0.039006083	0.613167366	0.376604576	0.087409691	0.018247965	0.933789205	FALSE
1237	PF3D7_0914000.1o1_7665	-0.802924463	-0.858300754	-0.055376291	0.697833997	0.5439869	0.228773094	-0.017799676	0.944366085	FALSE
1238	PF3D7_0914100.iso1.exon1.amp1_2279	-0.833647654	-1.047743609	-0.214095955	0.161288469	0.415968553	0.262080696	-0.088808978	0.914975982	FALSE
1239	PF3D7_0914200.3o4_7023	-0.31847544	-0.225188984	0.093286456	0.612221292	0.487030936	0.343713553	0.032852785	0.933789205	FALSE
1240	PF3D7_0914800.1o1_6098	-0.799395525	-1.046510604	-0.247115079	0.058228827	0.492150926	0.188621265	-0.087957947	0.844903507	FALSE
1241	PF3D7_0915300.iso1.exon1.amp1_149	-0.382510157	-0.359126066	0.023384091	0.939015236	0.490051499	0.620007841	0.007700116	0.992371014	FALSE
1242	PF3D7_0915400.e1s1_6348	0.178973736	0.887948684	0.708974948	0.180567119	0.816552076	0.965154368	0.141618571	0.914975982	FALSE
1243	PF3D7_0916200.iso1.exon1.amp1_2352	-0.401057082	-0.610510702	-0.20945362	0.015868361	0.342806619	0.114681471	-0.10726227	0.609108571	FALSE
1244	PF3D7_0916200.iso1.exon2.amp1_2241	-0.360357775	-0.382815575	-0.022457801	0.894637738	0.483054099	0.314181185	-0.008009536	0.987948059	FALSE
1245	PF3D7_0916200.iso1.exon2.amp2_1904	-0.402616086	-0.378760315	0.023855771	0.931140409	0.532509359	0.550567653	0.007438017	0.992371014	FALSE
1246	PF3D7_0916700.e1s1_6618	-0.491655526	-0.699531619	-0.207876092	0.158899684	0.519356299	0.233024544	-0.069882341	0.914975982	FALSE
1247	PF3D7_0916800.iso1.exon1.amp1_3204	-0.293378338	-0.345492176	-0.052113839	0.659354839	0.483006292	0.178528791	-0.018912472	0.935559505	FALSE
1248	PF3D7_0917000.iso1.exon1.amp2_1923	-0.58801488	-0.591167404	-0.003152524	0.992851612	0.613635324	0.709163797	-0.000840712	0.998822427	FALSE
1249	PF3D7_0917200.2o2_4677	-0.583350612	-0.53290414	0.050446472	0.899385842	0.595601306	0.812808081	0.013485114	0.988767131	FALSE
1250	PF3D7_0917300.1o1_6428	-0.561548898	-0.93081039	-0.369261492	0.013126004	0.487054162	0.211542612	-0.132470993	0.553944093	FALSE
1251	PF3D7_0917500.e1s1_7508	-0.681365397	-0.473952783	0.207412614	0.419486099	0.351660495	0.505272353	0.092957965	0.917134742	FALSE
1252	PF3D7_0917900.e2_8279	-0.19255297	0.321500768	0.514053739	0.202532678	0.670992045	0.740426082	0.126168413	0.914975982	FALSE
1253	PF3D7_0918000.e1s1_8347	-0.182214311	-0.445970036	-0.263755725	0.197628984	0.713763865	0.328529774	-0.064475792	0.914975982	FALSE
1254	PF3D7_0918300.e2s1_6599	0.453343176	1.160017963	0.706674787	0.339789237	0.760700349	1.444487768	0.136344813	0.915060736	FALSE
1255	PF3D7_0918900.e1s1_7198	-0.203591408	0.336466406	0.540057814	0.382918175	0.893254077	1.205959832	0.096453894	0.915060736	FALSE
1256	PF3D7_0918900.e1s2_7481	0.00062832	-0.242481115	-0.243109435	0.348667692	1.030904758	0.392816534	-0.041314511	0.915060736	FALSE
1257	PF3D7_0919200.iso1.exon1.amp1_389	-0.649920377	-0.68711991	-0.037199533	0.867215584	0.443768167	0.441454184	-0.013979164	0.985408067	FALSE
1258	PF3D7_0919400.e1s1_4873	-0.453198048	-0.576614811	-0.123416763	0.380021031	0.390003595	0.25329731	-0.054522109	0.915060736	FALSE
1259	PF3D7_0919800.iso1.exon1.amp1_3111	-0.480606427	0.126861973	0.6074684	0.195789578	0.537694894	0.869085763	0.173400076	0.914975982	FALSE
1260	PF3D7_0919800.iso1.exon1.amp2_seg1_1133	-0.152510318	0.039903639	0.192413957	0.650497142	0.623754952	0.855891751	0.049062768	0.933789205	FALSE
1261	PF3D7_0919900.iso1.exon1.amp1_1105	-0.658786372	-0.721946902	-0.06316053	0.88968137	0.992896952	0.893134714	-0.010716297	0.986424105	FALSE
1262	PF3D7_0919900.iso1.exon1.amp4_1035	-0.327695735	-0.283399371	0.044296364	0.746687334	0.337151634	0.262262696	0.022394172	0.961741518	FALSE
1263	PF3D7_0920300.1o4_5819	-0.496013735	-0.68716668	-0.191152945	0.727589085	1.355624398	1.047544138	-0.024045565	0.957663815	FALSE
1264	PF3D7_0920400.s1_5698	-0.688066959	-0.837928223	-0.149861263	0.110857392	0.391520864	0.12956567	-0.067205848	0.881162544	FALSE
1265	PF3D7_0920800.e1s1_4875	-0.373878284	-0.594398537	-0.220520253	0.161391983	0.532926192	0.253359168	-0.072136763	0.914975982	FALSE
1266	PF3D7_0920900.iso1.exon2.amp1_3864	-0.42032455	0.109948334	0.530272884	0.430530475	0.501747918	1.345639888	0.135571263	0.917134742	FALSE
1267	PF3D7_0921200.2o6_8242	-0.619328054	-1.03087285	-0.411544796	0.004191105	0.625577931	0.162847981	-0.115805475	0.379092195	FALSE
1268	PF3D7_0921400.e1_5664	-0.578475075	-0.734305942	-0.155830867	0.203493159	0.524869965	0.168293317	-0.052149959	0.914975982	FALSE
1269	PF3D7_0921800.1o3_8466	-1.038385118	-1.071311808	-0.03292669	0.926549681	0.555927809	0.72596103	-0.009505964	0.99230528	FALSE
1270	PF3D7_0922100.e1s2_8955	-1.329295838	-1.433330827	-0.104034989	0.764711724	0.886876247	0.660114641	-0.020054031	0.965879132	FALSE
1271	PF3D7_0922200.e1s1_7191	-0.555647112	-0.475261024	0.080386089	0.692808697	0.394010148	0.402164711	0.033924663	0.943484986	FALSE
1272	PF3D7_0922500_7709	-0.51778596	0.028197805	0.545983765	0.099148377	0.631416576	0.567667072	0.145676162	0.875552328	FALSE
1273	PF3D7_0922800.iso1.exon4.amp3_229	-0.298942171	-0.373103906	-0.074161735	0.709316816	0.618930609	0.355893744	-0.020757197	0.949521883	FALSE
1274	PF3D7_0923800.1.e1s1_7487	0.205493044	0.307812891	0.102319847	0.642797271	0.802682261	0.364550659	0.022249149	0.933789205	FALSE
1275	PF3D7_0923800.iso2.exon1.amp1_446	0.043960518	0.389593498	0.34563298	0.092806242	0.73587964	0.313189286	0.082105384	0.874701525	FALSE
1276	PF3D7_0924000.iso1.exon1.amp1_3692	-0.540293409	-0.495925864	0.044367546	0.916980743	0.738813979	0.857636543	0.009820917	0.991159216	FALSE
1277	PF3D7_0924000.iso1.exon1.amp2_3981	-0.749633139	0.157772231	0.90740537	0.237763675	0.466018731	1.459401342	0.230712322	0.915060736	FALSE
1278	PF3D7_0924000.iso1.exon2.amp1_2373	-0.560502626	-0.604325221	-0.043822596	0.77014483	0.44643897	0.273201734	-0.016960036	0.966343362	FALSE
1279	PF3D7_0924200.iso1.exon1.amp1_2570	-0.442010777	-0.514417086	-0.072406309	0.572965879	0.495533757	0.203048429	-0.02556336	0.933789205	FALSE
1280	PF3D7_0924600.iso1.exon1.amp1_2177	0.618400383	1.23019812	0.611797737	0.359268337	0.939479579	1.295290229	0.103479225	0.915060736	FALSE
1281	PF3D7_0924600.iso1.exon2.amp2_seg1_2289	-0.577036082	-0.660982571	-0.08394649	0.676206179	0.366919938	0.399239777	-0.037747398	0.93820426	FALSE
1282	PF3D7_0925300.1o1_6180	-0.494406368	-1.048369846	-0.553963478	0.000330017	0.758516148	0.101102639	-0.128961362	0.11567095	FALSE
1283	PF3D7_0925800.e1s1_9121	-0.549598858	-0.472430631	0.077168227	0.755353468	0.701571376	0.457892452	0.018946396	0.963667248	FALSE
1284	PF3D7_0925900.e2s1_8042	-0.579451524	-0.823293279	-0.243841756	0.103760153	0.413284111	0.248961528	-0.102012021	0.881162544	FALSE
1285	PF3D7_0926200.iso1.exon1.amp1_3505	-0.166097302	-0.526915208	-0.360817906	0.214906771	0.805214654	0.506525427	-0.077324594	0.915060736	FALSE
1286	PF3D7_0926500.iso1.exon1.amp2_2495	-0.317801072	-0.491188736	-0.173387664	0.262115975	0.494345298	0.261277219	-0.060948045	0.915060736	FALSE
1287	PF3D7_0927300.e1s1_7797	-0.778485668	-0.767833197	0.010652471	0.972544322	0.93070319	0.563995845	0.00197842	0.998686155	FALSE
1288	PF3D7_0927700.1o1_7283	-0.498177761	-0.736585039	-0.238407279	0.147019741	0.721374207	0.215973203	-0.058098435	0.912603236	FALSE
1289	PF3D7_0927800.2o2_4680	-0.601275828	-0.96413277	-0.362856942	0.172018306	0.595396298	0.470844647	-0.103755285	0.914975982	FALSE
1290	PF3D7_0927900.1o1_4984	-0.620244877	-0.893389937	-0.27314506	0.055623432	0.360916922	0.229837379	-0.130518918	0.837609343	FALSE
1291	PF3D7_0928600.1o1_6100	-0.776124075	-0.656443153	0.119680922	0.681570728	0.755156331	0.549937119	0.027131572	0.93820426	FALSE
1292	PF3D7_0928700.iso1.exon1.amp1_3151	-0.719731472	-0.184950965	0.534780507	0.241064287	0.346696588	0.86604362	0.204381663	0.915060736	FALSE
1293	PF3D7_0929000.2o2_8472	-0.254727434	0.209614735	0.464342169	0.287460463	0.428027443	0.840029313	0.15756048	0.915060736	FALSE
1294	PF3D7_0929000.e2_5102	-0.456192269	0.097981675	0.554173944	0.138201597	0.885383105	0.647652841	0.107122567	0.897030738	FALSE
1295	PF3D7_0929600.2o2_4963	-0.6775243	-0.839115602	-0.161591302	0.414557034	0.726708584	0.320194623	-0.03883972	0.917134742	FALSE
1296	PF3D7_0929800.iso1.exon1.amp1_4123	-0.31056053	-0.288000285	0.022560244	0.936059961	0.419517076	0.573262473	0.008559839	0.992371014	FALSE
1297	PF3D7_0929900.iso1.exon1.amp1_1496	-0.33049682	-0.435152921	-0.104656102	0.591925446	0.443164141	0.375075899	-0.039994777	0.933789205	FALSE
1298	PF3D7_0930100.iso1.exon1.amp2_192	-0.468262082	-0.833181616	-0.364919533	0.004791323	0.649041907	0.098871577	-0.09924769	0.40482314	FALSE
1299	PF3D7_0930200.iso1.exon4.amp1_2997	-0.399964334	-0.69720807	-0.297243736	0.106580931	0.597930612	0.29417532	-0.08657933	0.881162544	FALSE
1300	PF3D7_0930300.s1_9167	-0.285053784	0.253430151	0.538483935	0.406087614	0.879403008	1.272085556	0.096373212	0.915831356	FALSE
1301	PF3D7_0930300.s2_8884	1.053064689	1.761102169	0.70803748	0.378194861	1.238103313	1.558671186	0.092358341	0.915060736	FALSE
1302	PF3D7_0930600.iso1.exon5.amp1_2100	-0.51675865	0.19375394	0.71051259	0.160315896	0.487722173	0.920012471	0.214250735	0.914975982	FALSE
1303	PF3D7_0930700.iso1.exon1.amp1_702	-0.656433656	-0.300249985	0.35618367	0.394014577	0.446545686	0.824708615	0.11806417	0.915060736	FALSE
1304	PF3D7_0930700.iso1.exon2.amp1_2944	-0.502716225	-0.786465675	-0.283749451	0.033450251	0.34469355	0.207112086	-0.142344915	0.764497354	FALSE
1305	PF3D7_0931300.1o1_6427	-0.701341258	-0.335115008	0.36622625	0.219469908	0.7013826	0.535016481	0.089119671	0.915060736	FALSE
1306	PF3D7_0931300_6263	-0.817265274	-0.587420633	0.229844642	0.363392437	0.580510342	0.471336483	0.067275137	0.915060736	FALSE
1307	PF3D7_0931400.3o4_4980	0.012597803	-0.522138952	-0.534736755	0.034715771	0.776438259	0.384954905	-0.119918547	0.779350831	FALSE
1308	PF3D7_0931600.iso1.exon2.amp1_2996	-0.49638832	0.046246741	0.542635061	0.424318735	0.555157905	1.355393727	0.130799956	0.917134742	FALSE
1309	PF3D7_0931700.2o3_7353	-0.544477481	0.389286212	0.933763693	0.216104941	0.901381262	1.409215791	0.160273134	0.915060736	FALSE
1310	PF3D7_0931800.e1s1_7757	-0.481515885	-0.651954811	-0.170438926	0.203704002	0.417024684	0.225516855	-0.070963643	0.914975982	FALSE
1311	PF3D7_0932100.2o5_9117	-0.321224291	-0.050965805	0.270258486	0.570496352	0.436637994	0.969236671	0.086074093	0.933789205	FALSE
1312	PF3D7_0932300.e1s1_4887	-0.34792493	0.032528967	0.380453897	0.235122551	0.525636903	0.596178735	0.118757798	0.915060736	FALSE
1313	PF3D7_0932700.iso1.exon1.amp2_4526	-0.389716421	-0.918406682	-0.528690261	0.04846187	1.128764808	0.351589662	-0.082301021	0.830402251	FALSE
1314	PF3D7_0933100.4o4_8227	-0.518479957	-0.792323669	-0.273843712	0.064679158	0.570508382	0.212646838	-0.084125394	0.847478319	FALSE
1315	PF3D7_0933500.s1_5707	-0.252517312	-0.42601839	-0.173501078	0.373834743	0.64619601	0.331147515	-0.046703479	0.915060736	FALSE
1316	PF3D7_0933600.e1s1_8054	-0.387951174	-0.447195364	-0.05924419	0.647966399	0.591105119	0.170313455	-0.017626427	0.933789205	FALSE
1317	PF3D7_0933900.4o4_5828	-0.029009148	0.589989803	0.61899895	0.161725499	0.95961755	0.782797911	0.109563691	0.914975982	FALSE
1318	PF3D7_0934300.1o1_7830	-0.547211565	-0.611174473	-0.063962907	0.715599309	0.512272615	0.32115216	-0.021549531	0.952773249	FALSE
1319	PF3D7_0935600.1o2_7901	0.08457837	1.009549515	0.924971145	0.226056111	1.334991308	1.41187991	0.114724953	0.915060736	FALSE
1320	PF3D7_0935800.e1_5085	-0.650798631	-0.475012842	0.175785789	0.479194288	0.522372578	0.476873286	0.056612175	0.925003338	FALSE
1321	PF3D7_0935800.e2_5959	-0.581081878	-0.50207208	0.079009798	0.746083982	0.38144668	0.492862604	0.033305451	0.961406014	FALSE
1322	PF3D7_0935800.e9_9148	0.564509778	1.205212465	0.640702687	0.348939873	1.104681361	1.315263677	0.094497335	0.915060736	FALSE
1323	PF3D7_0935900.e1s1_8599	-0.260527864	-0.5995217	-0.338993837	0.421018774	0.742392298	0.816314223	-0.075235134	0.917134742	FALSE
1324	PF3D7_0935900.e2s1_9232	0.251741986	1.6584393	1.406697313	0.018087643	1.318087352	0.888055059	0.18352578	0.638885378	FALSE
1325	PF3D7_0936200.2o2_4952	-0.390142351	-0.3899775	0.000164851	0.999664421	0.864163243	0.768311489	3.22E-05	0.999858995	FALSE
1326	PF3D7_0936300.2o2_8152	1.174690012	2.091144787	0.916454775	0.263133585	0.974427242	1.557047017	0.144756191	0.915060736	FALSE
1327	PF3D7_0936400.2o2_8989	-0.401007038	0.246947066	0.647954104	0.119563996	0.65065296	0.730194224	0.163633585	0.881162544	FALSE
1328	PF3D7_0936500.iso1.exon1.amp1_973	-0.652940999	-0.909896298	-0.256955299	0.151901956	0.624368401	0.284003725	-0.071828538	0.914019494	FALSE
1329	PF3D7_0936600.2o2_6426	-0.666812661	0.261991627	0.928804288	0.078753882	0.38039416	0.887828915	0.332920766	0.862677656	FALSE
1330	PF3D7_0936700.1o1_7018	-0.316542784	-0.663102196	-0.346559412	0.064123191	0.92789053	0.182379884	-0.065865782	0.847478319	FALSE
1331	PF3D7_0936800.e2s1_5455	0.159667391	0.466628263	0.306960871	0.478953668	0.928387099	0.830306181	0.05572959	0.925003338	FALSE
1332	PF3D7_0937000.2o2_6410	-0.502438511	-1.190661238	-0.688222726	0.028524241	1.107678111	0.453554679	-0.108701763	0.740573801	FALSE
1333	PF3D7_0937200.1o1_7291	-0.15615844	-0.377197727	-0.221039287	0.197786732	0.557558913	0.283836055	-0.068973299	0.914975982	FALSE
1334	PF3D7_0937300.iso1.exon2.amp1_3309	-0.231204481	0.039057182	0.270261663	0.668399405	0.851988932	1.27904429	0.049531264	0.936894427	FALSE
1335	PF3D7_0937400.iso1.exon2.amp1_1296	0.376257222	0.606747867	0.230490645	0.654838029	1.025228463	1.013372601	0.037517761	0.933789205	FALSE
1336	PF3D7_0937500.iso1.exon1.amp1_4176	-0.293048789	0.828086129	1.121134918	0.258932596	1.223603704	1.883627815	0.142266374	0.915060736	FALSE
1337	PF3D7_0937600.iso1.exon1.amp1_2479	-0.582640806	-0.63063366	-0.047992853	0.824620675	0.652155558	0.393587421	-0.012722788	0.979585743	FALSE
1338	PF3D7_0937600.iso1.exon2.amp1_3322	1.040132649	1.678325937	0.638193288	0.066078516	0.972013449	0.558482069	0.113742899	0.853844047	FALSE
1339	PF3D7_0937700.iso1.exon2.amp1_713	0.724412551	1.77874676	1.054334209	0.165742461	1.074740684	1.379424312	0.157921181	0.914975982	FALSE
1340	PF3D7_0937800.iso1.exon1.amp1_2169	-0.575021858	0.145197094	0.720218952	0.146178639	0.653894605	0.88930561	0.175475577	0.912603236	FALSE
1341	PF3D7_0937800.iso1.exon2.amp1_1654	-0.195512609	-0.197549881	-0.002037272	0.994238426	0.567806027	0.560055158	-0.000598898	0.998822427	FALSE
1342	PF3D7_1000100.iso1.exon2.amp1_3908	1.307966611	2.72508761	1.417120999	0.01725827	1.222151421	0.882866969	0.198602695	0.626262229	FALSE
1343	PF3D7_1000200.iso1.exon1.amp1_1575	2.072489401	2.860977546	0.788488146	0.343395204	1.328310726	1.599270375	0.09655151	0.915060736	FALSE
1344	PF3D7_1000300.iso1.exon1.amp1_3601	-0.150601053	0.629972203	0.780573256	0.273324912	0.739453293	1.363509214	0.156321298	0.915060736	FALSE
1345	PF3D7_1000400.iso1.exon1.amp1_1864	-0.01961678	0.862802634	0.882419414	0.290242079	0.984482409	1.600582285	0.137372479	0.915060736	FALSE
1346	PF3D7_1000500.iso1.exon3.amp1_4465	0.382283606	1.137394372	0.755110766	0.3000519	1.160257652	1.385534554	0.105989302	0.915060736	FALSE
1347	PF3D7_1001300.2o2_6130	-0.043368027	0.386215603	0.429583629	0.320562852	1.211694296	0.769600777	0.061150066	0.915060736	FALSE
1348	PF3D7_1001500.1o1_6967	0.685708954	0.556185378	-0.129523576	0.869098857	1.735921663	1.537856341	-0.012587	0.985408067	FALSE
1349	PF3D7_1001600.2o2_4757	-0.381919606	0.39169552	0.773615126	0.185199483	0.702200014	1.073902979	0.171315761	0.914975982	FALSE
1350	PF3D7_1001700.2o2_9009	-1.153820555	-0.987358657	0.166461898	0.77491618	1.361982214	1.125005481	0.020739409	0.968147545	FALSE
1351	PF3D7_1001900.2o2_7282	-0.014797982	-0.24002575	-0.225227768	0.199114413	0.703224593	0.257239692	-0.056150145	0.914975982	FALSE
1352	PF3D7_1002100.2o2_7048	2.330961066	2.707178058	0.376216993	0.444706186	1.093164101	0.933816469	0.058240227	0.919099687	FALSE
1353	PF3D7_1002500.1o3_8986	0.355115898	0.095208784	-0.259907113	0.498562927	1.073338007	0.700736001	-0.041709522	0.926395115	FALSE
1354	PF3D7_1002800.e1s2_6354	-0.4711204	-0.558921024	-0.087800624	0.632883562	0.612232964	0.318351339	-0.024933777	0.933789205	FALSE
1355	PF3D7_1003100.iso1.exon3.amp1_38	-0.708195543	-0.855670809	-0.147475266	0.370301073	0.358602564	0.309424131	-0.069535662	0.915060736	FALSE
1356	PF3D7_1003400.iso1.exon1.amp3_seg2_2299	-0.215834855	-0.101103406	0.114731449	0.840171162	0.811970669	1.160282202	0.022294768	0.981270492	FALSE
1357	PF3D7_1003600.e1s1_8919	-0.47365203	-0.274251141	0.199400888	0.515928559	0.490248874	0.60718975	0.065863332	0.926395115	FALSE
1358	PF3D7_1003800.e1s2_7780	1.078659999	0.946809981	-0.131850017	0.660181125	1.084566925	0.497793954	-0.02121313	0.935559505	FALSE
1359	PF3D7_1004200.e2s2_6055	-1.101988555	-1.344192117	-0.242203562	0.159677543	0.852820644	0.177011703	-0.050070462	0.914975982	FALSE
1360	PF3D7_1004300.iso1.exon1.amp2_2505	-0.731502096	-0.863619862	-0.132117766	0.491617299	0.522897876	0.35265226	-0.043447183	0.926395115	FALSE
1361	PF3D7_1004800.2o3_6717	-0.07236434	-0.46735995	-0.394995609	0.052698671	0.50787836	0.327545386	-0.134045249	0.830402251	FALSE
1362	PF3D7_1005000.1o1_7075	-0.266350124	-0.403585469	-0.137235345	0.632146735	0.62655344	0.555666282	-0.036946161	0.933789205	FALSE
1363	PF3D7_1005300.2o2_8452	-0.570762298	-0.675433374	-0.104671076	0.683686988	0.414677377	0.515812741	-0.040845758	0.93927404	FALSE
1364	PF3D7_1005500.e2s1_9236	-0.124023995	-0.364314662	-0.240290667	0.347454021	0.792552556	0.443779987	-0.052575825	0.915060736	FALSE
1365	PF3D7_1005700.iso1.exon2.amp1_3583	-0.344157546	-0.261199093	0.082958453	0.605891025	0.286312447	0.318375485	0.047669038	0.933789205	FALSE
1366	PF3D7_1006000.iso1.exon2.amp1_1866	-0.157456722	-0.001846768	0.155609955	0.749106448	0.838145575	0.975683928	0.030350309	0.962376195	FALSE
1367	PF3D7_1006500.1o1_7278	-0.014533848	0.666402996	0.680936844	0.088802021	0.775198843	0.679173517	0.14832807	0.874701525	FALSE
1368	PF3D7_1007000.iso1.exon8.amp1_631	-0.409953951	-0.324510087	0.085443864	0.804652968	0.909928232	0.652233839	0.016090964	0.975412922	FALSE
1369	PF3D7_1007300.iso1.exon1.amp1_3315	-0.439033163	0.790162764	1.229195927	0.010053319	0.64911685	0.653547526	0.315367353	0.503384036	FALSE
1370	PF3D7_1007700.e1s1_6640	0.545157423	0.243466801	-0.301690621	0.632301674	1.104600025	1.253002737	-0.04481206	0.933789205	FALSE
1371	PF3D7_1007700.e1s2_8091	2.305503808	3.244663327	0.939159519	0.113342399	1.024986378	1.032596274	0.152584608	0.881162544	FALSE
1372	PF3D7_1007800.iso1.exon1.amp1_1414	-0.772329292	-0.945621069	-0.173291777	0.295030543	0.539895996	0.27926993	-0.05581476	0.915060736	FALSE
1373	PF3D7_1008000.s2_8597	0.072962074	0.17968577	0.106723695	0.644024256	0.786785898	0.395958549	0.02360811	0.933789205	FALSE
1374	PF3D7_1008100.s1_7726	0.593918355	0.598971379	0.005053023	0.99225582	0.768344729	1.062378197	0.001044452	0.998822427	FALSE
1375	PF3D7_1008100.s3_5986	-0.13107683	0.064231281	0.195308111	0.730011961	0.795213353	1.149568908	0.038660329	0.957663815	FALSE
1376	PF3D7_1008200.iso1.exon1.amp1_2743	-0.51728133	-0.592219328	-0.074937998	0.550496236	0.503582728	0.19177998	-0.02607083	0.933789205	FALSE
1377	PF3D7_1008400.e1s1_5157	-0.585220794	-1.10853071	-0.523309916	0.059244693	1.156278111	0.371431606	-0.079494793	0.844903507	FALSE
1378	PF3D7_1008600.1o1_6726	-0.620501328	-0.547047633	0.073453695	0.620134399	0.370074011	0.280478454	0.033891668	0.933789205	FALSE
1379	PF3D7_1008700.e3s1_6589	-0.818198837	-0.516075709	0.302123128	0.550358112	0.751335975	1.009305741	0.064210375	0.933789205	FALSE
1380	PF3D7_1008800.e1s1_8915	-0.963777693	-0.715422981	0.248354712	0.300205683	0.505683624	0.445812623	0.082886709	0.915060736	FALSE
1381	PF3D7_1009000.1o1_8727	0.063411248	0.498473786	0.435062539	0.206491344	0.739458112	0.62165465	0.099696488	0.914975982	FALSE
1382	PF3D7_1009300.iso1.exon1.amp1_1604	-0.482045077	0.000964222	0.483009299	0.36731416	0.33208569	1.05959047	0.170557397	0.915060736	FALSE
1383	PF3D7_1009500.e3_5958	-0.570067348	-0.36066065	0.209406698	0.274234469	0.680953349	0.309397316	0.053674222	0.915060736	FALSE
1384	PF3D7_1009600.iso1.exon3.amp1_2459	-0.464280244	0.403540319	0.867820563	0.118399302	0.883456074	0.973608057	0.161800193	0.881162544	FALSE
1385	PF3D7_1010200.iso1.exon1.amp2_1917	-0.588557157	-0.232778222	0.355778934	0.363419596	0.497290412	0.763590769	0.111149381	0.915060736	FALSE
1386	PF3D7_1010900.iso1.exon2.amp1_108	-0.446348302	-0.24097189	0.205376412	0.640449801	0.621513756	0.887359111	0.052147893	0.933789205	FALSE
1387	PF3D7_1011300.1o1_5319	-0.769562632	-0.627746527	0.141816105	0.787643888	0.695770756	1.075916953	0.031615166	0.969245152	FALSE
1388	PF3D7_1011400.1o1_6697	-0.615857027	-0.740644218	-0.12478719	0.570867329	0.536492311	0.41708974	-0.039647513	0.933789205	FALSE
1389	PF3D7_1011500.1o1_7558	-0.526326555	-0.988464706	-0.462138151	0.025347922	1.043522406	0.175557245	-0.078149854	0.710755726	FALSE
1390	PF3D7_1011700 (renamed)_6433	0.217924155	0.212915006	-0.00500915	0.988764614	1.235320714	0.608934755	-0.000706174	0.998822427	FALSE
1391	PF3D7_1011800.e1s2_7200	-0.219197568	0.480409576	0.699607144	0.237401619	0.686171141	1.115881218	0.156252058	0.915060736	FALSE
1392	PF3D7_1011900.iso1.exon4.amp1_2357	-0.571881139	-0.661361217	-0.089480078	0.609935107	0.541434244	0.313002624	-0.028623235	0.933789205	FALSE
1393	PF3D7_1012000.iso1.exon1.amp1_2737	-0.659048762	-0.474699006	0.184349756	0.273487627	0.42593153	0.303115412	0.074199095	0.915060736	FALSE
1394	PF3D7_1012000.iso1.exon9.amp1_3295	-0.518988406	-0.629241451	-0.110253044	0.488921508	0.418439266	0.294856189	-0.045196736	0.926395115	FALSE
1395	PF3D7_1012100.iso1.exon1.amp1_2444	-0.702534588	-0.696539274	0.005995314	0.983209477	0.395824525	0.583354581	0.002374521	0.998822427	FALSE
1396	PF3D7_1012200.1o2_8148	0.260344158	0.253614509	-0.006729649	0.992336866	1.2887319	1.405032112	-0.00086134	0.998822427	FALSE
1397	PF3D7_1012400.e3s1_5724	-0.423059185	-0.667512097	-0.244452911	0.068632282	0.501409744	0.196808871	-0.085366085	0.862652712	FALSE
1398	PF3D7_1012500.e1s1_9230	-0.602168434	-0.853431103	-0.251262668	0.16137616	0.690255849	0.269072801	-0.063746589	0.914975982	FALSE
1399	PF3D7_1012600.e1s1_9222	-0.895391285	-0.887070401	0.008320884	0.968796544	0.51024285	0.410949719	0.002772604	0.998686155	FALSE
1400	PF3D7_1012700.e1s1_7980	1.246049141	1.054635979	-0.191413162	0.696433496	1.047175424	0.958238176	-0.030744065	0.944366085	FALSE
1401	PF3D7_1012700.e1s2_6240	-0.433428261	-0.262510938	0.170917323	0.625538394	0.668478798	0.689980111	0.042459594	0.933789205	FALSE
1402	PF3D7_1013100.1o2_5076	-0.708596652	-0.607140525	0.101456127	0.751073461	0.605996757	0.635613433	0.027749432	0.962376195	FALSE
1403	PF3D7_1013100.2o2_4787	-0.336621221	-0.258257125	0.078364096	0.684537147	0.510567797	0.361858762	0.02631875	0.939278071	FALSE
1404	PF3D7_1013200.iso1.exon1.amp1_4310	-0.435648732	-0.460515474	-0.024866743	0.951663159	0.587162293	0.838459805	-0.006683168	0.99537408	FALSE
1405	PF3D7_1013200.iso1.exon1.amp2_2506	-0.242938148	-0.176917546	0.066020603	0.843878687	0.693046826	0.66176507	0.015955303	0.981270492	FALSE
1406	PF3D7_1013400.iso1.exon9.amp1_3307	-0.376478128	-0.424116042	-0.047637914	0.826701339	0.710973868	0.3830043	-0.01163554	0.979720799	FALSE
1407	PF3D7_1013700.iso1.exon1.amp1_3828	-0.359563203	-0.081946115	0.277617088	0.6450589	0.757209831	1.22348782	0.056276454	0.933789205	FALSE
1408	PF3D7_1013900.iso1.exon1.amp2_seg2_4622	0.021123744	-0.224277831	-0.245401575	0.564425449	0.826422134	0.83293898	-0.049447287	0.933789205	FALSE
1409	PF3D7_1014000.iso1.exon6.amp1_1249	-0.295064133	-0.413118322	-0.11805419	0.13410283	0.265062615	0.12582411	-0.077647255	0.893405987	FALSE
1410	PF3D7_1014000.iso1.exon7.amp1_955	-0.546340676	-0.762654094	-0.216313418	0.160704537	0.781401573	0.145815043	-0.048830486	0.914975982	FALSE
1411	PF3D7_1014100.s1_5371	0.317131655	1.76792382	1.450792166	0.092162732	1.252966294	1.475539474	0.188962822	0.874701525	FALSE
1412	PF3D7_1014100.s2_5660	0.792662011	1.495985615	0.703323604	0.135536371	1.087191195	0.817578085	0.1105204	0.894556606	FALSE
1413	PF3D7_1014300.e1s3_6628	-0.580167205	-0.236146638	0.344020568	0.220489656	0.521409068	0.515741926	0.110097342	0.915060736	FALSE
1414	PF3D7_1014500.iso1.exon1.amp2_3369	-0.552924491	-0.606483719	-0.053559228	0.806114565	0.595977561	0.408271955	-0.01544013	0.975839887	FALSE
1415	PF3D7_1014600 (renamed, has duplicates)_5653	-0.356331177	-0.479591202	-0.123260026	0.630476419	0.739560891	0.468166607	-0.028751452	0.933789205	FALSE
1416	PF3D7_1014600.e1s2_7100	-0.227171364	0.208785692	0.435957056	0.303760872	0.830342344	0.794984058	0.087913531	0.915060736	FALSE
1417	PF3D7_1014600.e1s3_8257	-0.022114452	0.394153147	0.416267599	0.382323642	0.619027095	0.932452319	0.104922574	0.915060736	FALSE
1418	PF3D7_1014800.6o11_8787	-0.408181998	-0.585982176	-0.177800178	0.307471637	0.624885626	0.281649281	-0.049671965	0.915060736	FALSE
1419	PF3D7_1014800.7o11_8498	-0.233302004	-0.46362111	-0.230319107	0.414554406	0.586228674	0.537766924	-0.066064772	0.917134742	FALSE
1420	PF3D7_1014900.iso1.exon1.amp1_3710	-0.46057032	-0.435003819	0.025566501	0.948906472	0.627066943	0.810593481	0.006555284	0.99537408	FALSE
1421	PF3D7_1015100.1o1_9044	-0.473853892	0.200715641	0.674569533	0.078553832	0.706965594	0.644972419	0.160531871	0.862677656	FALSE
1422	PF3D7_1015200.iso1.exon3.amp1_1792	-0.394911517	-0.74432435	-0.349412833	0.005965372	0.482302887	0.164677223	-0.127145922	0.410424048	FALSE
1423	PF3D7_1015500.1o1_8772	-0.33965597	0.010891	0.35054697	0.608143592	0.726069108	1.391474391	0.070656346	0.933789205	FALSE
1424	PF3D7_1015900.e2s1_5752	0.187848645	0.089128048	-0.098720597	0.703903855	0.862542669	0.45207301	-0.019893954	0.946640963	FALSE
1425	PF3D7_1016000.iso1.exon1.amp1_1018	-0.659635931	-0.81768403	-0.158048099	0.58894885	0.483047015	0.581808111	-0.053215439	0.933789205	FALSE
1426	PF3D7_1016200.1o1_8491	0.260907516	0.741723139	0.480815623	0.424674674	0.954007059	1.176468744	0.081669787	0.917134742	FALSE
1427	PF3D7_1016300.e1s1_5130	-0.368504604	-0.337774442	0.030730161	0.967855569	1.356079919	1.534014654	0.003719495	0.998686155	FALSE
1428	PF3D7_1016500.e1s1_7472	-0.180050428	0.003809189	0.183859618	0.611210524	0.599826049	0.720685914	0.049872675	0.933789205	FALSE
1429	PF3D7_1016500.e2s1_8376	-0.607692202	-0.518269825	0.089422377	0.725733271	0.536675771	0.499593416	0.027978609	0.957663815	FALSE
1430	PF3D7_1016700.iso1.exon2.amp1_3820	-0.587348103	-0.703926848	-0.116578745	0.460018536	0.341471558	0.301020229	-0.05761812	0.920899767	FALSE
1431	PF3D7_1016900.e1s1_4855	-0.163710288	-0.608264844	-0.444554556	0.018227828	0.911506858	0.184415852	-0.085996723	0.638885378	FALSE
1432	PF3D7_1017000.e1s1_7482	-0.279907453	-0.27625391	0.003653543	0.989989064	0.721013972	0.559070447	0.000863893	0.998822427	FALSE
1433	PF3D7_1017000.e1s2_7193	-0.233389331	0.184910212	0.418299542	0.251869041	0.424211475	0.691697361	0.151016048	0.915060736	FALSE
1434	PF3D7_1017100.1o1_6988	0.537783426	0.393508399	-0.144275027	0.666384562	0.764133665	0.645813443	-0.031979804	0.936894427	FALSE
1435	PF3D7_1017300.1.2o2_6764	0.041007683	-0.180594255	-0.221601938	0.567783314	0.782750646	0.755615137	-0.047364066	0.933789205	FALSE
1436	PF3D7_1017800.iso1.exon3.amp1_1681	-0.138109576	-0.281498194	-0.143388618	0.461302686	0.659827559	0.330117531	-0.037828501	0.920899767	FALSE
1437	PF3D7_1017800.iso1.exon3.amp2_1970	-0.47274731	-0.634915121	-0.16216781	0.309669811	0.568506484	0.259157781	-0.049783531	0.915060736	FALSE
1438	PF3D7_1017900.e2s1_5746	-0.513594161	-0.744547107	-0.230952946	0.03289343	0.3585807	0.160888637	-0.112451394	0.764497354	FALSE
1439	PF3D7_1018000.1o1_8202	-0.70833483	-0.810940701	-0.102605872	0.783322289	0.565703106	0.756571546	-0.02898628	0.969245152	FALSE
1440	PF3D7_1018100.1o1_6997	-0.48599173	-0.434878343	0.051113387	0.869170473	0.519201855	0.626609313	0.016006722	0.985408067	FALSE
1441	PF3D7_1018300.e1s1_5945	-0.327756454	-0.027772027	0.299984427	0.660224931	0.869480736	1.386183026	0.05313171	0.935559505	FALSE
1442	PF3D7_1018300.e2s2_5481	-0.539116517	-0.819974718	-0.280858201	0.05058216	0.613526576	0.186099585	-0.080462883	0.830402251	FALSE
1443	PF3D7_1019000.e1s1_6639	-0.020865345	-0.250784304	-0.229918958	0.35404148	0.867070447	0.409430104	-0.046235546	0.915060736	FALSE
1444	PF3D7_1019000.e1s2_6350	-0.654158229	-0.562255232	0.091902997	0.733616931	0.534038912	0.533679347	0.028683887	0.957663815	FALSE
1445	PF3D7_1019300.iso1.exon1.amp2_1043	0.05167027	-0.040375395	-0.092045665	0.864326456	0.976987539	1.079853026	-0.015512425	0.985408067	FALSE
1446	PF3D7_1019400.e2s1_9178	-0.475495922	-0.753803517	-0.278307594	0.175855038	0.50140242	0.361185609	-0.095086036	0.914975982	FALSE
1447	PF3D7_1019500.1.6o25_6176	-0.05999692	0.055710342	0.115707262	0.807051604	0.982029463	0.933776903	0.019742859	0.975839887	FALSE
1448	PF3D7_1019500.1.9o25_6465	-0.740181177	-0.77760451	-0.037423333	0.907445422	0.512858552	0.652959283	-0.011762652	0.990555727	FALSE
1449	PF3D7_1020200.e2s1_4857	-0.200906791	-0.261715233	-0.060808442	0.779037149	0.466193909	0.424548235	-0.021948443	0.968889936	FALSE
1450	PF3D7_1020200.e3s1_5754	-0.611173233	-0.573424527	0.037748705	0.853364387	0.374666023	0.408833706	0.016617026	0.983895452	FALSE
1451	PF3D7_1020300.e1s1_7784	-0.147539739	0.698150869	0.845690608	0.04043231	1.027178912	0.650729217	0.142023834	0.809964087	FALSE
1452	PF3D7_1020500.1o1_4727	-0.420915017	-0.215085026	0.205829991	0.59680865	0.458125655	0.788419432	0.067850726	0.933789205	FALSE
1453	PF3D7_1020700.e1s1_7201	-0.607071474	-0.451253352	0.155818122	0.339097863	0.394622555	0.299933659	0.06740951	0.915060736	FALSE
1454	PF3D7_1020700.e1s2_8363	-0.527245704	-0.106446424	0.42079928	0.450199407	0.730106778	1.103775455	0.089855585	0.920899767	FALSE
1455	PF3D7_1020800.11o11_6470	-0.503205393	-0.648999863	-0.14579447	0.571386756	0.653568172	0.484081962	-0.038148078	0.933789205	FALSE
1456	PF3D7_1021000.iso1.exon2.amp1_3284	-0.642435877	-0.599718144	0.042717733	0.813253685	0.396728774	0.353646317	0.018154168	0.977857346	FALSE
1457	PF3D7_1021000.iso1.exon4.amp1_1510	-0.562601875	0.158136951	0.720738826	0.186365194	0.45360417	1.008290065	0.220844493	0.914975982	FALSE
1458	PF3D7_1021200.1o1_6485	0.458607579	0.727728971	0.269121392	0.576309812	0.869080612	0.949930573	0.051060971	0.933789205	FALSE
1459	PF3D7_1021500.iso1.exon1.amp1_154	-0.62616861	0.026038793	0.652207402	0.247617201	0.487874803	1.072400625	0.186597463	0.915060736	FALSE
1460	PF3D7_1021600.e1s1_6028	-0.228342687	-0.237750829	-0.009408143	0.971986723	0.85447469	0.477432107	-0.001909488	0.998686155	FALSE
1461	PF3D7_1021700.e1s2_6931	-0.058176814	0.003795136	0.06197195	0.837418989	0.649141953	0.592878397	0.016059896	0.981246488	FALSE
1462	PF3D7_1021700.e1s3_8087	-1.0065241	-0.521005036	0.485519063	0.214813068	0.800227306	0.712007548	0.102312174	0.915060736	FALSE
1463	PF3D7_1021700.e2s2_7510	-0.45490198	-0.004570286	0.450331695	0.37292276	0.797652637	0.978092782	0.091568189	0.915060736	FALSE
1464	PF3D7_1021700.e3s1_8324	0.229372783	0.328484082	0.099111299	0.863908792	0.78070597	1.183716612	0.019779268	0.985408067	FALSE
1465	PF3D7_1021800.iso1.exon2.amp1_3703	0.648529151	1.017460077	0.368930925	0.523804679	1.056475735	1.133961413	0.057715965	0.929587545	FALSE
1466	PF3D7_1021900.e1s2_5472	0.664562544	0.746279355	0.081716811	0.808516792	1.16924841	0.576363167	0.012171171	0.976058475	FALSE
1467	PF3D7_1021900.e1s3_6056	0.060297249	0.179262276	0.118965026	0.697629476	0.736438977	0.586644572	0.027487313	0.944366085	FALSE
1468	PF3D7_1022000.e2_4806	0.803483689	1.81420819	1.010724501	0.075499047	0.945754402	0.954574655	0.177930955	0.862677656	FALSE
1469	PF3D7_1022200.e2s1_5154	-0.695272644	-0.105023963	0.590248681	0.308513584	0.372601156	1.12816972	0.191163402	0.915060736	FALSE
1470	PF3D7_1022300.2o6_4974	-0.168534547	-0.12660371	0.041930837	0.952507646	1.026281945	1.437464559	0.00647243	0.99537408	FALSE
1471	PF3D7_1022700.1o1_7854	-0.569731088	-0.502298336	0.067432752	0.786588172	0.580194064	0.481913778	0.019713329	0.969245152	FALSE
1472	PF3D7_1023100.e1s3_6525	-0.811361516	-0.405166778	0.406194739	0.394507102	0.802745385	0.92326065	0.082861612	0.915060736	FALSE
1473	PF3D7_1023100.e1s4_6236	-0.641079852	0.20542014	0.846499993	0.156888489	0.578984944	1.084641387	0.215477833	0.914975982	FALSE
1474	PF3D7_1023100.e1s6_5941	0.205124426	0.929780887	0.724656461	0.265529282	1.07196727	1.222984932	0.110826012	0.915060736	FALSE
1475	PF3D7_1023200.1o1_6706	-0.033141442	-0.396184114	-0.363042672	0.280622702	1.297897125	0.516867922	-0.048964331	0.915060736	FALSE
1476	PF3D7_1023900.s3_8307	-0.006139213	-0.003743971	0.002395243	0.993583099	0.750815805	0.569664178	0.000544694	0.998822427	FALSE
1477	PF3D7_1024000.iso1.exon1.amp1_1314	-0.331270803	-0.337044895	-0.005774092	0.984473847	0.778391695	0.562423558	-0.001270524	0.998822427	FALSE
1478	PF3D7_1024300.1o1_7540	-0.469624213	-0.160030898	0.309593315	0.530931903	0.701595225	0.986005435	0.069858088	0.933789205	FALSE
1479	PF3D7_1024400.1o2_7617	-0.492721514	-0.778426162	-0.285704648	0.078264571	0.733322083	0.198469673	-0.068559618	0.862677656	FALSE
1480	PF3D7_1024800.e2s2_5767	0.362925623	0.681141054	0.318215431	0.632595688	1.284675908	1.310493317	0.041190694	0.933789205	FALSE
1481	PF3D7_1026500.iso1.exon1.amp1_1214	-0.549557158	-0.563408763	-0.013851605	0.833950065	0.279758159	0.09652475	-0.008688301	0.980022573	FALSE
1482	PF3D7_1026900.1o1_7582	-0.891860988	-0.847489789	0.044371199	0.825596422	0.446596319	0.393306293	0.016769414	0.979585743	FALSE
1483	PF3D7_1027000.iso1.exon1.amp2_seg1_3452	-0.673548114	-0.638426152	0.035121962	0.933710107	0.671321624	0.857023735	0.008429665	0.992371014	FALSE
1484	PF3D7_1027400.iso1.exon1.amp1_87	-0.358355953	-0.470020853	-0.1116649	0.436793586	0.29857971	0.274445471	-0.062875375	0.917134742	FALSE
1485	PF3D7_1028000.iso1.exon2.amp1_1224	-0.450249931	-0.506519072	-0.056269141	0.54944713	0.321543185	0.159901207	-0.030468079	0.933789205	FALSE
1486	PF3D7_1028300.e1s1_5740	-0.502412872	-0.576911886	-0.074499014	0.66283692	0.467598023	0.317520502	-0.027386363	0.935901032	FALSE
1487	PF3D7_1028700.1o1_8478	0.529813659	1.711489993	1.181676335	0.069557552	1.289186886	1.081755185	0.155342774	0.862652712	FALSE
1488	PF3D7_1028900.2o2_7542	-0.526370518	-0.463293651	0.063076867	0.772919767	0.577127585	0.412014152	0.018733209	0.967098183	FALSE
1489	PF3D7_1029400.1o1_7611	-0.675616448	-0.28341527	0.392201179	0.238671066	0.900301241	0.586321361	0.075046182	0.915060736	FALSE
1490	PF3D7_1029500.1o1_4650	-0.163767725	-0.406674836	-0.242907111	0.325967715	0.744749391	0.431645268	-0.056483728	0.915060736	FALSE
1491	PF3D7_1030200.1o1_4717	0.634877099	1.316705442	0.681828343	0.122061959	0.942935709	0.764158503	0.122881197	0.881162544	FALSE
1492	PF3D7_1030400.2o2_6704	-0.351831619	-0.78801419	-0.436182571	0.232995552	1.056584906	0.633380939	-0.071391676	0.915060736	FALSE
1493	PF3D7_1030500.1o1_4988	-0.66249981	-0.777710979	-0.115211168	0.511777888	0.694096769	0.271151639	-0.029066733	0.926395115	FALSE
1494	PF3D7_1030700.iso1.exon1.amp1_391	-0.491819069	-0.104577325	0.387241744	0.313286908	0.562674743	0.735882849	0.110427125	0.915060736	FALSE
1495	PF3D7_1030800.1o1_5237	-0.072865366	0.125993117	0.198858483	0.654928151	1.030051591	0.856060186	0.032743698	0.933789205	FALSE
1496	PF3D7_1031500.iso1.exon1.amp1_1891	-0.595816013	-0.65139919	-0.055583177	0.849980843	0.559162046	0.585969394	-0.016477767	0.981270492	FALSE
1497	PF3D7_1031500.iso1.exon4.amp1_656	-0.502089783	-0.678692316	-0.176602533	0.052300369	0.376411972	0.122056419	-0.082399215	0.830402251	FALSE
1498	PF3D7_1031800.iso1.exon1.amp1_698	-0.333692456	-0.135474598	0.198217858	0.640896513	0.435648759	0.868315368	0.065747747	0.933789205	FALSE
1499	PF3D7_1032100.iso1.exon1.amp1_3724	-0.293817149	-0.182535227	0.111281922	0.710564878	0.553920037	0.596225831	0.033191997	0.94967775	FALSE
1500	PF3D7_1032100.iso1.exon1.amp2_4232	0.337660801	-0.010969589	-0.348630389	0.649157233	1.839818173	1.464409763	-0.032245257	0.933789205	FALSE
1501	PF3D7_1032400.3o7_4720	-0.406471663	0.470071826	0.876543489	0.113668772	0.35857664	0.971419761	0.312075624	0.881162544	FALSE
1502	PF3D7_1032900.e1s1_8259	-0.295426241	-0.30647534	-0.011049098	0.955123513	0.788782714	0.303213203	-0.002453692	0.99537408	FALSE
1503	PF3D7_1033700.e3s1_8911	-0.57396925	-0.617871147	-0.043901898	0.844684222	0.378478085	0.451853024	-0.018891414	0.981270492	FALSE
1504	PF3D7_1033800.8o8_9037	-0.203442593	-0.14499688	0.058445713	0.872210459	0.996581698	0.680184122	0.010078015	0.985408067	FALSE
1505	PF3D7_1034100.iso1.exon2.amp1_2074	-0.329934416	-0.429360594	-0.099426178	0.594510465	0.33878104	0.368855453	-0.048417461	0.933789205	FALSE
1506	PF3D7_1034500.iso1.exon2.amp2_seg1_573	-0.416522275	-0.666649947	-0.250127672	0.132116746	0.458845814	0.280271293	-0.094193702	0.890517679	FALSE
1507	PF3D7_1034700.1o1_4662	-0.519502303	-0.751728018	-0.232225715	0.365627749	0.409836452	0.49566812	-0.092100453	0.915060736	FALSE
1508	PF3D7_1034900.e1s1_8260	-0.556394703	-0.484746292	0.07164841	0.886271579	0.637872826	1.028947808	0.017248335	0.985408067	FALSE
1509	PF3D7_1035000.1o1_8245	-0.628834526	-0.159649053	0.469185473	0.126922825	0.507909573	0.541393746	0.152807768	0.881162544	FALSE
1510	PF3D7_1035100.1o1_8208	0.399285288	1.30358665	0.904301362	0.220572462	1.123506954	1.370564931	0.130652155	0.915060736	FALSE
1511	PF3D7_1035200.1o1_4741	-0.560657122	-0.038144067	0.522513055	0.364325132	0.907208987	1.112827099	0.093409561	0.915060736	FALSE
1512	PF3D7_1035300.iso1.exon1.amp1_2847	-0.2397689	0.801263488	1.041032388	0.256698694	1.030334312	1.743421218	0.153277228	0.915060736	FALSE
1513	PF3D7_1035300.iso1.exon1.amp2_3364	-0.664623176	0.303402777	0.968025953	0.273715995	0.610058458	1.701225364	0.199747364	0.915060736	FALSE
1514	PF3D7_1035600.1o1_6162	-0.113413437	-0.593726424	-0.480312987	0.04500563	0.927198973	0.336618213	-0.090829711	0.830402251	FALSE
1515	PF3D7_1035700.e1s1_8948	-0.04418713	0.906474613	0.950661743	0.205596825	0.937903999	1.394088569	0.158612952	0.914975982	FALSE
1516	PF3D7_1035800.1o1_5041	0.910338875	0.628595982	-0.281742892	0.564847084	1.499838813	0.872993975	-0.032525712	0.933789205	FALSE
1517	PF3D7_1035900.1o1_5890	1.785951565	2.920325645	1.13437408	0.00180652	1.185569508	0.470152039	0.167504733	0.295421049	FALSE
1518	PF3D7_1036000.1o1_5293	0.457676095	1.07763324	0.619957145	0.248384683	1.227328613	0.975807322	0.085963052	0.915060736	FALSE
1519	PF3D7_1036300.1o1_6786	-0.637558829	-0.077467946	0.560090882	0.346197885	0.618202572	1.161717926	0.133400598	0.915060736	FALSE
1520	PF3D7_1036400.1o2_6117	0.773383349	1.696766445	0.923383096	0.299842771	1.590312373	1.68127461	0.096145203	0.915060736	FALSE
1521	PF3D7_1036400.e2s2_6540	-0.271112796	0.142438309	0.413551105	0.612868401	1.183770975	1.643288461	0.055439776	0.933789205	FALSE
1522	PF3D7_1036500.1o1_6762	0.244004229	1.138139848	0.894135619	0.180273118	0.942056613	1.219656257	0.152561309	0.914975982	FALSE
1523	PF3D7_1036600.iso1.exon3.amp1_3273	-0.931605827	-0.965703964	-0.034098137	0.884987677	0.850447667	0.394458643	-0.006994324	0.985408067	FALSE
1524	PF3D7_1036600.iso2.exon3.amp1_3851	-0.266284082	0.106255207	0.372539289	0.244718776	0.686391206	0.585654337	0.091857088	0.915060736	FALSE
1525	PF3D7_1036900.e1s2_5948	0.431814069	0.385544096	-0.046269973	0.908598192	1.167963634	0.742975818	-0.006832503	0.990555727	FALSE
1526	PF3D7_1036900.e2s1_6576	-0.636135276	-0.763882171	-0.127746896	0.333728284	0.382945474	0.233635182	-0.057645185	0.915060736	FALSE
1527	PF3D7_1037000.iso1.exon3.amp1_4275	0.309000737	0.905322026	0.59632129	0.240781543	1.010412245	0.93534768	0.099153931	0.915060736	FALSE
1528	PF3D7_1037000.iso1.exon3.amp2_4564	-0.302086723	0.203823563	0.505910286	0.436795179	0.836767906	1.286676483	0.093899987	0.917134742	FALSE
1529	PF3D7_1037100.1o1_9098	-0.223916087	-0.128078048	0.095838039	0.703615398	0.773383522	0.452747195	0.021451592	0.946640963	FALSE
1530	PF3D7_1037200.10o12_7895	-0.34133493	-0.396986065	-0.055651135	0.828981348	0.384161929	0.523889764	-0.023067317	0.980022573	FALSE
1531	PF3D7_1037600.e2s1_7184	-0.018555453	0.174142819	0.192698272	0.720070913	0.921780986	1.077025618	0.034155569	0.95750546	FALSE
1532	PF3D7_1037600.e3s1_6616	-0.68421541	-0.434202814	0.250012595	0.284804328	0.53137712	0.429118229	0.079977347	0.915060736	FALSE
1533	PF3D7_1038400.e1s1_8544	-0.45761602	0.420869448	0.878485467	0.445657825	0.830363756	2.311350875	0.133297553	0.919099687	FALSE
1534	PF3D7_1038400.e3s1_7460	-0.483586547	0.25176916	0.735355706	0.361875264	0.533131187	1.592073878	0.167672292	0.915060736	FALSE
1535	PF3D7_1038400.e7s1_7389	-0.186832313	0.643657594	0.830489906	0.401930975	0.918555913	1.964631121	0.127482946	0.915060736	FALSE
1536	PF3D7_1038500.2o2_4992	-0.15707811	-0.013869403	0.143208707	0.691964615	0.767984338	0.706229923	0.031348902	0.942793383	FALSE
1537	PF3D7_1038600.2o2_8191	-0.532340396	-0.530876919	0.001463477	0.992739387	0.340962528	0.317064262	0.000720803	0.998822427	FALSE
1538	PF3D7_1038900.e1s1_9213	-0.817065479	-0.765461095	0.051604385	0.870928421	0.527800611	0.641700827	0.015879045	0.985408067	FALSE
1539	PF3D7_1039700.iso1.exon1.amp1_1851	0.302333289	0.655351529	0.35301824	0.650235081	1.244730947	1.560470005	0.045835073	0.933789205	FALSE
1540	PF3D7_1039900.iso1.exon2.amp1_3588	-0.406622541	-0.514446485	-0.107823944	0.713168897	0.743130199	0.556596923	-0.024794675	0.950891862	FALSE
1541	PF3D7_1040000.iso1.exon2.amp1_1585	-0.039097595	0.444069011	0.483166605	0.620686829	0.934999424	1.994753882	0.072930216	0.933789205	FALSE
1542	PF3D7_1040100.iso1.exon2.amp1_3299	1.100306264	1.462266732	0.361960468	0.614655178	1.151828215	1.436671191	0.050828943	0.933789205	FALSE
1543	PF3D7_1040200.iso1.exon2.amp1_408	0.440127042	0.900331425	0.460204383	0.543602207	1.09707052	1.512715291	0.066656209	0.933789205	FALSE
1544	PF3D7_1040300.iso1.exon2.amp1_997	0.531698626	1.489861884	0.958163258	0.341348051	1.241537147	1.956237459	0.119182718	0.915060736	FALSE
1545	PF3D7_1040400.iso1.exon2.amp1_2156	-0.017006402	0.430655512	0.447661914	0.385853254	0.885788162	0.996117178	0.08301879	0.915060736	FALSE
1546	PF3D7_1040500.iso1.exon2.amp1_2735	-0.2304476	0.315991224	0.546438824	0.318715902	0.820955243	1.050497694	0.107204355	0.915060736	FALSE
1547	PF3D7_1040600.iso1.exon2.amp1_2150	-0.25782498	0.436655465	0.694480445	0.328298639	0.801403211	1.379114196	0.130871707	0.915060736	FALSE
1548	PF3D7_1040700.iso1.exon2.amp1_419	-0.235364827	0.182678067	0.418042894	0.474917212	0.839639793	1.158338026	0.079106113	0.923125961	FALSE
1549	PF3D7_1040900.iso1.exon2.amp1_2143	0.066073738	1.347001901	1.280928163	0.027294491	0.844056837	0.881005561	0.251683003	0.731203283	FALSE
1550	PF3D7_1041000.iso1.exon2.amp1_1280	0.195607446	0.856140513	0.660533067	0.178639619	0.86032768	0.889451155	0.127474872	0.914975982	FALSE
1551	PF3D7_1041100.iso1.exon2.amp1_3013	-0.170325555	1.143736457	1.314062012	0.12429333	0.736652496	1.513655192	0.255123387	0.881162544	FALSE
1552	PF3D7_1041200.iso1.exon2.amp1_2153	0.326573217	0.842988319	0.516415102	0.574513518	1.015669398	1.863521682	0.075405901	0.933789205	FALSE
1553	PF3D7_1041300.iso1.exon1.amp1_1293	0.531391924	1.7767694	1.245377476	0.109869234	1.129943608	1.357304811	0.179333392	0.881162544	FALSE
1554	PF3D7_1041300.iso1.exon2.amp1_498	-0.344887796	0.08135008	0.426237877	0.391373552	0.70097461	0.971600048	0.096524566	0.915060736	FALSE
1555	PF3D7_1041300.iso1.exon2.amp2_787	-0.868506467	-0.705428347	0.16307812	0.615527741	0.48665866	0.651751534	0.053539094	0.933789205	FALSE
1556	PF3D7_1100100.iso1.exon1.amp1_4545	-0.634896628	-0.250017269	0.384879359	0.351398736	0.583779	0.800089027	0.10488265	0.915060736	FALSE
1557	PF3D7_1100100.iso1.exon2.amp1_1582	0.623449132	1.478332641	0.854883509	0.242993016	1.155366038	1.368710819	0.120646489	0.915060736	FALSE
1558	PF3D7_1100200.e1s1_7391	-0.65636686	-0.148175283	0.508191577	0.128661796	0.400088404	0.593337667	0.198863701	0.883745191	FALSE
1559	PF3D7_1100200.e1s2_8548	-0.725491623	-0.136002389	0.589489234	0.397087235	0.604115914	1.380475998	0.134177878	0.915060736	FALSE
1560	PF3D7_1100200.e1s3_7392	-0.553242823	0.192028686	0.745271509	0.115518377	0.698921005	0.828889769	0.173837144	0.881162544	FALSE
1561	PF3D7_1100300.iso1.exon2.amp1_4474	0.810663388	1.520620871	0.709957483	0.415982284	1.306105023	1.708008743	0.087219216	0.917134742	FALSE
1562	PF3D7_1100400.iso1.exon2.amp1_3590	0.001108761	0.441978251	0.440869491	0.606747458	0.835299164	1.746880799	0.075022126	0.933789205	FALSE
1563	PF3D7_1100500.iso1.exon1.amp1_699	-0.099863239	0.06042664	0.160289878	0.694999429	0.778474705	0.809555924	0.034162851	0.944366085	FALSE
1564	PF3D7_1100800.2o2_4959	-0.565449038	-0.348823631	0.216625407	0.584313425	0.635103123	0.78893043	0.055206578	0.933789205	FALSE
1565	PF3D7_1101100.iso1.exon1.amp1_3897	0.16095875	0.618072671	0.457113922	0.520157272	0.834470373	1.427956363	0.082853	0.92766636	FALSE
1566	PF3D7_1101200.iso1.exon1.amp1_3319	0.671460322	1.541962037	0.870501715	0.20113381	1.188807239	1.246077072	0.121377799	0.914975982	FALSE
1567	PF3D7_1101300.iso1.exon1.amp1_2434	0.22633466	0.576667803	0.350333143	0.588922339	0.883004159	1.304650814	0.062165525	0.933789205	FALSE
1568	PF3D7_1101500.iso1.exon1.amp1_3877	-0.525445692	-0.583465967	-0.058020275	0.835675454	0.736527705	0.528607377	-0.013497891	0.980022573	FALSE
1569	PF3D7_1101700.iso1.exon2.amp1_2140	0.446777567	1.123182726	0.676405159	0.362275863	1.125524198	1.436852859	0.096831149	0.915060736	FALSE
1570	PF3D7_1102200.iso1.exon1.amp1_2170	-0.245896029	-0.387970153	-0.142074124	0.73619476	0.928346128	0.821714101	-0.025819156	0.958555259	FALSE
1571	PF3D7_1102400.1o1_6766	-0.362773394	-0.39997971	-0.037206316	0.899203555	0.507174974	0.591943098	-0.011987804	0.988767131	FALSE
1572	PF3D7_1102500.e2s1_5459	1.097807003	1.480257326	0.382450323	0.656622058	1.141071653	1.743810848	0.052127532	0.934954037	FALSE
1573	PF3D7_1102700.iso1.exon1.amp1_375	-0.525740316	0.100527443	0.62626776	0.380421893	0.969948227	1.394236936	0.101753264	0.915060736	FALSE
1574	PF3D7_1102800.iso1.exon1.amp1_671	1.415376003	2.153433636	0.738057632	0.378562267	1.577673031	1.60308761	0.077828711	0.915060736	FALSE
1575	PF3D7_1103000.iso1.exon1.amp1_1212	-0.570982746	-0.585548294	-0.014565549	0.800163568	0.296065433	0.054928757	-0.008678244	0.973280887	FALSE
1576	PF3D7_1103100.e2s1_8572	-0.308001098	-0.633545164	-0.325544066	0.10144915	0.842140742	0.268031192	-0.067907509	0.875552328	FALSE
1577	PF3D7_1103500.13o13_6965	-0.361817666	-0.080340949	0.281476716	0.339772956	0.480740957	0.565461382	0.095569342	0.915060736	FALSE
1578	PF3D7_1103500.1o13_8994	-0.218229256	0.051512169	0.269741425	0.557232828	0.669968565	0.918550981	0.064045774	0.933789205	FALSE
1579	PF3D7_1103500.1o2_7831	0.415408648	0.777321837	0.361913189	0.50244974	0.820362333	1.069038655	0.070831153	0.926395115	FALSE
1580	PF3D7_1103800.e1s1_7393	1.242048644	1.700733061	0.458684416	0.438048026	1.268347565	1.126304661	0.06099396	0.917178677	FALSE
1581	PF3D7_1104000.1o3_6466	-0.630858253	-0.838015184	-0.20715693	0.082347493	0.424178939	0.181010633	-0.085366599	0.86568626	FALSE
1582	PF3D7_1104100.4o4_7289	-0.185270433	-0.312699256	-0.127428823	0.378956563	0.597641888	0.212540638	-0.037397758	0.915060736	FALSE
1583	PF3D7_1104200.e1s2_5379	-0.489614225	-0.084252587	0.405361638	0.268363369	0.361992196	0.700219814	0.163398373	0.915060736	FALSE
1584	PF3D7_1104800.2o9_8185	-0.787860286	-1.192208154	-0.404347868	0.003491061	0.657591604	0.130530191	-0.108431896	0.337549502	FALSE
1585	PF3D7_1105200.iso1.exon3.amp1_951	-0.485821272	-0.666841556	-0.181020284	0.139796591	0.308351393	0.210944144	-0.100869759	0.900191564	FALSE
1586	PF3D7_1105600.e1s1_6922	-0.626383415	0.13999778	0.766381195	0.113593163	0.594391259	0.848222161	0.203494325	0.881162544	FALSE
1587	PF3D7_1105900.iso1.exon1.amp1_1541	-0.753894139	-0.980699224	-0.226805085	0.025155671	0.374427714	0.142184423	-0.106128143	0.710755726	FALSE
1588	PF3D7_1106100.iso1.exon4.amp1_381	-0.520891521	-0.582342946	-0.061451424	0.673809432	0.364462008	0.277295039	-0.02878291	0.936977941	FALSE
1589	PF3D7_1106300.2o6_8231	0.094350808	0.360445698	0.266094891	0.682239117	0.887096379	1.318196196	0.046942185	0.93820426	FALSE
1590	PF3D7_1106700.iso1.exon1.amp2_772	-0.557565558	-0.91975724	-0.362191681	0.001896426	0.592149262	0.072139122	-0.108026377	0.295421049	FALSE
1591	PF3D7_1107400.iso1.exon1.amp1_3598	0.355989334	0.576304435	0.220315101	0.783215043	0.831535385	1.650972656	0.038334935	0.969245152	FALSE
1592	PF3D7_1107500.iso1.exon5.amp1_2058	-0.276794553	-0.391134271	-0.114339719	0.513589843	0.695832219	0.268956527	-0.028780593	0.926395115	FALSE
1593	PF3D7_1107600.iso1.exon1.amp1_seg2_2908	-0.556672774	-0.552993844	0.00367893	0.978312094	0.655537922	0.157637216	0.000988518	0.998822427	FALSE
1594	PF3D7_1107600.iso1.exon1.amp2_3661	-0.587978428	-0.068671611	0.519306817	0.06118611	0.460307469	0.456624483	0.188195677	0.844903507	FALSE
1595	PF3D7_1107800.e2s1_7678	-0.434424434	-0.51441634	-0.079991905	0.595247803	0.541983977	0.249819994	-0.025750929	0.933789205	FALSE
1596	PF3D7_1107900.iso1.exon1.amp1_542	-0.526874368	-0.381083214	0.145791154	0.478914117	0.525535165	0.3830056	0.047489318	0.925003338	FALSE
1597	PF3D7_1108100.iso1.exon1.amp1_2831	-0.72102053	-0.760158621	-0.039138091	0.73350512	0.349063145	0.207681894	-0.019396292	0.957663815	FALSE
1598	PF3D7_1108600.e1s1_6906	-0.227580128	-0.432532243	-0.204952116	0.351809516	0.576398115	0.400058692	-0.061046065	0.915060736	FALSE
1599	PF3D7_1109200.3o4_6218	-0.028249782	0.740745105	0.768994887	0.279506637	1.031588799	1.350256601	0.119592701	0.915060736	FALSE
1600	PF3D7_1110200.e1s1_4895	0.108520702	1.238748366	1.130227664	0.205274912	0.7772739	1.665115807	0.204909506	0.914975982	FALSE
1601	PF3D7_1110200.e1s2_6629	-0.272655456	-0.283869283	-0.011213827	0.957321931	0.583678213	0.391044308	-0.003304848	0.99537408	FALSE
1602	PF3D7_1110200.e2s1_6580	-0.463646183	-0.386208122	0.077438062	0.831530893	0.535310865	0.740888183	0.02296995	0.980022573	FALSE
1603	PF3D7_1110400.e3s2_7791	-0.723129966	-0.594353684	0.128776282	0.75682923	0.574069848	0.846810271	0.035160442	0.963667248	FALSE
1604	PF3D7_1110700.e2s1_5162	-0.457959808	-0.700302869	-0.24234306	0.108857634	0.639052731	0.204944926	-0.066610857	0.881162544	FALSE
1605	PF3D7_1111000.1o1_6758	-0.329305709	-0.280642136	0.048663573	0.793137396	0.483494297	0.351118977	0.017233551	0.96962367	FALSE
1606	PF3D7_1111300.1o1_8154	-0.093154924	0.463748833	0.556903757	0.432473624	0.737927537	1.411391074	0.110514867	0.917134742	FALSE
1607	PF3D7_1111400.iso1.exon1.amp1_2422	-0.289609516	-0.612155907	-0.322546391	0.12656478	0.642531399	0.347362167	-0.087162817	0.881162544	FALSE
1608	PF3D7_1111600.iso1.exon1.amp1_437	-0.229877531	0.091824995	0.321702526	0.401697423	0.671622469	0.741254402	0.078882101	0.915060736	FALSE
1609	PF3D7_1111800.iso1.exon1.amp1_2132	-1.396646017	-1.02799925	0.368646767	0.189805533	1.126285227	0.411755097	0.057383787	0.914975982	FALSE
1610	PF3D7_1111800.iso1.exon2.amp1_2710	0.207396887	0.528417953	0.321021066	0.504523029	0.857035719	0.942358534	0.06171601	0.926395115	FALSE
1611	PF3D7_1111900.iso1.exon1.amp1_693	0.079173282	0.58966529	0.510492009	0.451373667	0.867471974	1.344037945	0.09123788	0.920899767	FALSE
1612	PF3D7_1112100.iso1.exon1.amp1_1397	-0.442698846	-0.442727939	-2.91E-05	0.999858995	0.701110561	0.239187044	-7.28E-06	0.999858995	FALSE
1613	PF3D7_1112100.iso1.exon1.amp2_1686	-0.452479129	-0.542146649	-0.08966752	0.567648616	0.532654753	0.268207861	-0.029298079	0.933789205	FALSE
1614	PF3D7_1112100.iso1.exon1.amp3_2210	-0.544346878	-0.512582096	0.031764782	0.903271694	0.315038864	0.538299465	0.015256288	0.988992794	FALSE
1615	PF3D7_1112400.1o1_4663	-0.227298562	-0.780247598	-0.552949036	0.065299926	0.62321936	0.495006033	-0.151003465	0.851632529	FALSE
1616	PF3D7_1113000.iso1.exon2.amp1_1889	-0.485899459	-0.857235849	-0.37133639	0.037800646	0.741704414	0.235618733	-0.087950761	0.801055824	FALSE
1617	PF3D7_1113000.iso1.exon3.amp1_1542	-0.518279105	-0.257310612	0.260968493	0.533313415	0.472964309	0.844072138	0.082492169	0.933789205	FALSE
1618	PF3D7_1113000.iso1.exon5.amp1_118	-0.581996574	-0.943162314	-0.36116574	0.048980984	0.684632637	0.264602729	-0.092396781	0.830402251	FALSE
1619	PF3D7_1113000.iso1.exon7.amp3_1351	-0.014192373	0.438469042	0.452661415	0.451952853	0.602148523	1.202364645	0.108562906	0.920899767	FALSE
1620	PF3D7_1113700.e1s1_8346	0.287474861	0.637984456	0.350509595	0.310563611	0.961118937	0.615085226	0.062879079	0.915060736	FALSE
1621	PF3D7_1114500.iso1.exon1.amp1_3323	-0.634034615	-0.297551432	0.336483183	0.370181623	0.486908431	0.732976284	0.107840687	0.915060736	FALSE
1622	PF3D7_1114700.e1_8271	-0.285404579	-0.393051956	-0.107647377	0.768258136	0.729787253	0.722316651	-0.024612058	0.966343362	FALSE
1623	PF3D7_1114900.e1s1_7681	-0.450635763	-0.491496404	-0.040860641	0.885415178	0.619933131	0.555873162	-0.011106828	0.985408067	FALSE
1624	PF3D7_1114900.e1s2_9122	-0.732991238	-0.713989023	0.019002215	0.919753081	0.557501589	0.34557057	0.005885682	0.991368218	FALSE
1625	PF3D7_1115200.2o7_7060	-0.536906453	-0.762052624	-0.225146171	0.25269053	0.470289291	0.355831827	-0.081755367	0.915060736	FALSE
1626	PF3D7_1115300.e1s1_7187	-0.117653591	-0.033079409	0.084574182	0.74222326	0.593312432	0.497415554	0.024159795	0.960360308	FALSE
1627	PF3D7_1115400.e1s1_6025	0.288001171	0.912270252	0.624269081	0.236805481	0.875588547	0.981761359	0.117165955	0.915060736	FALSE
1628	PF3D7_1115600.e3s1_6879	-0.153977698	-0.217437659	-0.063459961	0.843958351	0.725665283	0.62859341	-0.014781572	0.981270492	FALSE
1629	PF3D7_1115700.e1s1_7476	-0.586806497	-0.524305992	0.062500505	0.824731248	0.552034497	0.560568958	0.018837166	0.979585743	FALSE
1630	PF3D7_1116000.iso1.exon2.amp1_3093	0.166910764	1.02482484	0.857914076	0.48960927	1.190873277	2.497789595	0.102294007	0.926395115	FALSE
1631	PF3D7_1116000.iso1.exon2.amp2_3382	-0.147679069	0.877602931	1.025282	0.390288958	1.130102334	2.359789546	0.129027418	0.915060736	FALSE
1632	PF3D7_1116800.e4s1_7224	-0.564303683	-0.342230411	0.222073272	0.26126561	0.742901153	0.308221759	0.052283848	0.915060736	FALSE
1633	PF3D7_1117000.iso1.exon6.amp1_3500	-0.386103537	-0.530409378	-0.144305841	0.544048869	0.531213838	0.456105166	-0.045951336	0.933789205	FALSE
1634	PF3D7_1117200.iso1.exon2.amp1_1104	-0.363981316	-0.756156246	-0.39217493	0.005341817	0.523112112	0.183538773	-0.131520695	0.40482314	FALSE
1635	PF3D7_1117800.iso1.exon1.amp1_264	-0.478596396	0.110524076	0.589120472	0.180273552	0.310605467	0.810762232	0.246397622	0.914975982	FALSE
1636	PF3D7_1117900.iso1.exon1.amp1_2246	-0.368428379	-0.053002254	0.315426124	0.590595727	0.77875973	1.18154972	0.063096364	0.933789205	FALSE
1637	PF3D7_1118100.iso1.exon1.amp1_3510	-0.672353694	-0.775651463	-0.103297769	0.196431922	0.395920637	0.083034404	-0.045995696	0.914975982	FALSE
1638	PF3D7_1118100.iso1.exon2.amp1_2116	-0.294116071	-0.407495274	-0.113379202	0.184632553	0.331387876	0.128268353	-0.059922899	0.914975982	FALSE
1639	PF3D7_1118200.e1s1_7968	-0.082600477	1.111509128	1.194109605	0.033535369	0.712153764	0.865823369	0.272319796	0.764497354	FALSE
1640	PF3D7_1118300.e1s1_7205	-0.344925171	-0.098019228	0.246905943	0.599619501	0.560747026	0.952885651	0.066721697	0.933789205	FALSE
1641	PF3D7_1118800.2o7_5861	-0.618084569	-0.812349224	-0.194264655	0.028957068	0.366676008	0.116511044	-0.09307069	0.744913944	FALSE
1642	PF3D7_1119400.iso1.exon1.amp3_2783	-0.223988694	-0.035915405	0.188073289	0.485032621	0.729318251	0.49476333	0.044329143	0.926395115	FALSE
1643	PF3D7_1119500.iso1.exon1.amp1_3300	-0.52128513	-0.689681279	-0.168396149	0.551723868	0.644984955	0.541246311	-0.044247461	0.933789205	FALSE
1644	PF3D7_1119500.iso1.exon3.amp1_3827	-0.179088891	-0.380170528	-0.201081637	0.136401167	0.447550064	0.217023607	-0.0782826	0.894556606	FALSE
1645	PF3D7_1119700.iso1.exon1.amp1_1569	-0.402158543	-0.298874982	0.103283561	0.850572006	0.853603304	1.112448154	0.019426494	0.981270492	FALSE
1646	PF3D7_1119900.iso1.exon1.amp1_3728	0.02384531	-0.230724772	-0.254570081	0.049380106	0.551165643	0.168309796	-0.081177135	0.830402251	FALSE
1647	PF3D7_1120300.2o2_8189	0.114193474	0.203655037	0.089461563	0.711666824	0.574076651	0.465256561	0.026482407	0.950244654	FALSE
1648	PF3D7_1120400.iso1.exon2.amp1_1793	-0.555582995	-0.1197439	0.435839095	0.397623122	0.634299998	1.013391213	0.1057606	0.915060736	FALSE
1649	PF3D7_1120700.iso1.exon1.amp2_3653	-0.422258281	-0.293173099	0.129085182	0.729010306	0.808055503	0.727367968	0.026909819	0.957663815	FALSE
1650	PF3D7_1120800.iso1.exon1.amp1_4126	-0.638058731	-0.717426456	-0.079367725	0.747721088	0.550154368	0.48013037	-0.024368943	0.962376195	FALSE
1651	PF3D7_1121200.iso1.exon1.amp1_653	-0.107411896	-0.240713965	-0.133302069	0.677667145	0.749561761	0.616909188	-0.030185985	0.93820426	FALSE
1652	PF3D7_1121600.iso1.exon2.amp1_2679	-0.253770291	1.400620788	1.654391078	0.085956137	0.758058793	1.636357541	0.306686696	0.866982041	FALSE
1653	PF3D7_1121700.e1s1_5657	-0.453428425	-0.118125712	0.335302713	0.40916438	0.474581737	0.802150507	0.107212108	0.917134742	FALSE
1654	PF3D7_1121800.s1_7974	1.730253402	2.392881541	0.662628139	0.248093354	1.004619458	1.068146866	0.109141959	0.915060736	FALSE
1655	PF3D7_1122000.iso1.exon1.amp1_4471	-0.549818908	-0.589976591	-0.040157683	0.833296355	0.771290968	0.292524155	-0.009122329	0.980022573	FALSE
1656	PF3D7_1122500.iso1.exon1.amp1_3721	-0.505368225	-0.588704516	-0.083336292	0.48164507	0.537637126	0.15501833	-0.027259946	0.925003338	FALSE
1657	PF3D7_1122500.iso1.exon1.amp2_4229	-0.603874183	-0.432980614	0.17089357	0.330299676	0.599520761	0.292066585	0.04965903	0.915060736	FALSE
1658	PF3D7_1122600.2o2_5848	-0.324102935	-0.014000114	0.310102821	0.66737645	0.806690402	1.473819645	0.057082408	0.936894427	FALSE
1659	PF3D7_1122800.e1s1_6545	0.374790955	0.914290824	0.539499869	0.250774167	1.048963122	0.856548828	0.087351867	0.915060736	FALSE
1660	PF3D7_1122900.e1s1_9126	-1.131600859	-0.738546799	0.39305406	0.399120426	0.473772249	0.922022165	0.120821241	0.915060736	FALSE
1661	PF3D7_1122900.e2s2_7971	-0.220566778	-0.28222336	-0.061656582	0.87228459	0.893976851	0.743909293	-0.011696397	0.985408067	FALSE
1662	PF3D7_1122900.e2s3_6815	-0.457440003	-0.221134274	0.236305729	0.539806677	0.884023148	0.735742887	0.045331917	0.933789205	FALSE
1663	PF3D7_1122900.e2s5_7132	0.419069657	1.387415213	0.968345556	0.219514735	1.261214507	1.460507014	0.125607242	0.915060736	FALSE
1664	PF3D7_1123000.iso1.exon1.amp3_1921	-0.241767434	-0.202567371	0.039200063	0.925835928	0.604315902	0.860347375	0.010242611	0.99230528	FALSE
1665	PF3D7_1123200.iso1.exon1.amp1_3335	0.654981524	1.241377674	0.586396149	0.432271372	1.325768282	1.448608051	0.072936294	0.917134742	FALSE
1666	PF3D7_1123400.e1_5091	0.293569954	-0.491831902	-0.785401856	0.116585059	1.436715341	0.831030431	-0.094678091	0.881162544	FALSE
1667	PF3D7_1123500.iso1.exon1.amp1_4580	0.14089541	0.288210079	0.147314669	0.686135828	0.879801731	0.697530181	0.028501103	0.939416436	FALSE
1668	PF3D7_1124000.1o5_7896	-0.165004414	-0.208214186	-0.043209772	0.830390749	0.775566968	0.322799474	-0.009743966	0.980022573	FALSE
1669	PF3D7_1124000.2o5_7607	-0.432322846	-0.427378785	0.004944061	0.980149574	0.423061069	0.391505629	0.001963462	0.998822427	FALSE
1670	PF3D7_1124100.iso1.exon1.amp1_1988	0.215327254	0.230636302	0.015309048	0.963525112	0.809251889	0.645771649	0.003218537	0.997911665	FALSE
1671	PF3D7_1124300.1o3_7324	-0.251848429	-0.018553971	0.233294459	0.73570571	1.036595167	1.399064415	0.035906556	0.958555259	FALSE
1672	PF3D7_1124400.iso1.exon1.amp1_1806	-0.312291547	-0.350391593	-0.038100046	0.863440466	0.341205778	0.449972435	-0.017890333	0.985408067	FALSE
1673	PF3D7_1124500.1o1_7615	0.09639058	0.546159644	0.449769064	0.410872716	0.838893946	1.067847129	0.086428603	0.917134742	FALSE
1674	PF3D7_1124600.e1s1_5168	-0.178415406	-0.289014363	-0.110598956	0.785298984	1.113893511	0.758147705	-0.017065092	0.969245152	FALSE
1675	PF3D7_1124700.e1s1_6312	-0.550343968	-0.409301212	0.141042755	0.389681773	0.533355955	0.281011521	0.045956983	0.915060736	FALSE
1676	PF3D7_1125300.iso1.exon1.amp1_2856	0.16375662	-0.044900097	-0.208656717	0.655051129	0.906864609	0.920475544	-0.038283374	0.933789205	FALSE
1677	PF3D7_1125300.iso1.exon1.amp2_3352	0.497236158	0.121532381	-0.375703777	0.538925446	1.203440616	1.191099263	-0.05209098	0.933789205	FALSE
1678	PF3D7_1125400.2o2_5277	-0.69518213	-0.564765922	0.130416208	0.771505161	0.663266018	0.911591012	0.031263554	0.966998415	FALSE
1679	PF3D7_1125700.6o6_7634	-0.460941992	-0.157305531	0.303636461	0.470527931	0.850414797	0.810626248	0.05981196	0.921428022	FALSE
1680	PF3D7_1125800.1o4_6747	0.474920486	0.845703206	0.37078272	0.513268246	0.890862052	1.122797633	0.067205392	0.926395115	FALSE
1681	PF3D7_1125800.3o4_6458	-0.966930405	-0.564572646	0.402357759	0.203709696	0.513302746	0.582047983	0.128617287	0.914975982	FALSE
1682	PF3D7_1126000.e1s2_8344	-0.39276949	-0.266712405	0.126057085	0.585735319	0.390411961	0.459164009	0.052703364	0.933789205	FALSE
1683	PF3D7_1126100.iso1.exon2.amp2_220	-0.343494155	-0.249589173	0.093904982	0.749601276	0.651049166	0.573205134	0.02434542	0.962376195	FALSE
1684	PF3D7_1126300.e2_7985	-0.530513385	-0.415433121	0.115080264	0.473605808	0.431947302	0.29507202	0.045780886	0.921752019	FALSE
1685	PF3D7_1126400.2o3_5535	-0.30321655	0.990266722	1.293483272	0.169825465	0.648305869	1.72675472	0.256771191	0.914975982	FALSE
1686	PF3D7_1126500.iso1.exon1.amp1_2267	-0.451647798	-0.126312961	0.325334837	0.513908627	0.353327628	1.011009554	0.114427938	0.926395115	FALSE
1687	PF3D7_1127000.e6s1_6000	-0.059206183	-0.407753734	-0.348547551	0.050920803	0.521440172	0.280379401	-0.116084237	0.830402251	FALSE
1688	PF3D7_1127300.1o1_7293	-0.412611191	-0.658939472	-0.24632828	0.083783568	0.565439968	0.202349759	-0.076401903	0.866049105	FALSE
1689	PF3D7_1127400.iso1.exon1.amp1_2346	-1.006794773	-1.154771279	-0.147976506	0.280597171	0.552970941	0.203198957	-0.046911662	0.915060736	FALSE
1690	PF3D7_1127400.iso1.exon2.amp1_2078	-0.409360337	-0.565067674	-0.155707337	0.256860777	0.38000487	0.241813484	-0.070668	0.915060736	FALSE
1691	PF3D7_1127600.iso1.exon2.amp1_349	-0.52521144	0.11528331	0.64049475	0.419718392	0.460719977	1.5883381	0.155876972	0.917134742	FALSE
1692	PF3D7_1127700.1o3_4715	0.412823519	0.490870479	0.07804696	0.903723424	0.9045524	1.319457636	0.013556122	0.989086839	FALSE
1693	PF3D7_1127900.3o3_6444	0.116932007	0.525715055	0.408783048	0.539983825	0.953869911	1.332044458	0.067929714	0.933789205	FALSE
1694	PF3D7_1128100.2o3_7845	-0.412690258	0.327710594	0.740400852	0.078825392	0.763926206	0.709036795	0.162791934	0.862677656	FALSE
1695	PF3D7_1128300.e1s1_8069	-0.898247393	-0.081721563	0.81652583	0.185170176	0.403022353	1.139974772	0.253244633	0.914975982	FALSE
1696	PF3D7_1128300.e3s1_8903	-0.417373275	-0.473134227	-0.055760952	0.693596256	0.262217569	0.281033021	-0.03515278	0.944098982	FALSE
1697	PF3D7_1128500.1o1_8799	-0.245945021	-0.173371323	0.072573698	0.925929399	1.067357105	1.599087495	0.010621688	0.99230528	FALSE
1698	PF3D7_1129000.e1s1_6583	-0.433032103	-0.625077424	-0.192045321	0.181799315	0.383919139	0.249528503	-0.086181712	0.914975982	FALSE
1699	PF3D7_1129100.e1s1_6319	-0.41849558	-0.188133578	0.230362001	0.598761692	0.965222455	0.845295438	0.040302258	0.933789205	FALSE
1700	PF3D7_1129200.2o4_7594	-0.528036831	-0.671571916	-0.143535085	0.373698975	0.71199329	0.218548244	-0.035429471	0.915060736	FALSE
1701	PF3D7_1129500.iso1.exon1.amp1_4492	0.236209068	0.061960723	-0.174248344	0.685364243	1.080494417	0.816365777	-0.027542547	0.939416436	FALSE
1702	PF3D7_1129600.e1s1_8953	-0.510078383	-0.484272719	0.025805665	0.931707365	0.431736696	0.615284144	0.009436123	0.992371014	FALSE
1703	PF3D7_1129700.iso1.exon1.amp1_1271	-0.399984034	-0.168153521	0.231830513	0.279170057	0.291831107	0.40773669	0.125907676	0.915060736	FALSE
1704	PF3D7_1129800.1o1_9026	0.296932563	-0.106701972	-0.403634535	0.182932406	0.78229672	0.529220409	-0.088707849	0.914975982	FALSE
1705	PF3D7_1130200_5980	0.829771054	1.216791788	0.387020735	0.487617947	0.774839445	1.10766276	0.078803996	0.926395115	FALSE
1706	PF3D7_1130400_8004	0.112492016	0.495705751	0.383213736	0.424045811	0.605407506	0.946603733	0.097929492	0.917134742	FALSE
1707	PF3D7_1131200.iso1.exon1.amp1_62	-0.549162645	-0.650480966	-0.101318321	0.510846237	0.33043815	0.296151788	-0.051670944	0.926395115	FALSE
1708	PF3D7_1131200.iso1.exon6.amp1_345	-0.716652161	-0.717018292	-0.000366131	0.997190918	0.338666594	0.18369464	-0.000187692	0.999858995	FALSE
1709	PF3D7_1131600.s2_8288	0.085341905	0.046371183	-0.038970722	0.929097057	0.867912217	0.870666763	-0.007480973	0.992371014	FALSE
1710	PF3D7_1131800.iso1.exon1.amp1_838	-0.648327457	-0.829422983	-0.181095526	0.119748172	0.395974141	0.183854437	-0.079779573	0.881162544	FALSE
1711	PF3D7_1132300.1o1_5547	-0.055921748	0.510861295	0.566783042	0.12468254	0.870578583	0.634998172	0.111443029	0.881162544	FALSE
1712	PF3D7_1132900.1o1_6392	-0.436971748	0.362623587	0.799595335	0.084661016	0.844706203	0.785373403	0.158967601	0.866049105	FALSE
1713	PF3D7_1133200.e1s2_5075	-0.048000489	0.132532685	0.180533174	0.785336464	1.027429553	1.342136005	0.028199744	0.969245152	FALSE
1714	PF3D7_1133400_6235	1.401985526	2.676629616	1.27464409	1.47E-06	1.137781244	0.210104632	0.197620301	0.002065388	TRUE
1715	PF3D7_1133500.iso1.exon1.amp1_1264	-0.626129607	-0.656346635	-0.030217028	0.897862613	0.533380219	0.459026169	-0.009581058	0.988767131	FALSE
1716	PF3D7_1133500.iso1.exon2.amp1_4149	-0.518347261	0.278148545	0.796495805	0.280499482	0.490531494	1.423402294	0.20035381	0.915060736	FALSE
1717	PF3D7_1133700.iso1.exon1.amp1_970	-0.005336469	-0.010436015	-0.005099546	0.98496649	0.806097616	0.494790476	-0.001092888	0.998822427	FALSE
1718	PF3D7_1133800.iso1.exon1.amp1_1320	-0.334318295	-0.597000764	-0.262682469	0.293901436	0.642281254	0.451557592	-0.0701637	0.915060736	FALSE
1719	PF3D7_1133900.iso1.exon2.amp2_3355	-0.69637617	-0.734862812	-0.038486642	0.86350327	0.69814888	0.402035712	-0.009549209	0.985408067	FALSE
1720	PF3D7_1134000.e1s1_6336	0.999493066	1.565439882	0.565946816	0.234409839	0.823669464	0.882649662	0.113585133	0.915060736	FALSE
1721	PF3D7_1134200.s1_7422	-0.838111911	-0.099048035	0.739063877	0.119701776	0.619660858	0.835730454	0.190311513	0.881162544	FALSE
1722	PF3D7_1134300.iso1.exon1.amp1_4294	-0.645245571	-0.585144329	0.060101242	0.893653685	0.683358634	0.914715575	0.014053188	0.987703954	FALSE
1723	PF3D7_1134300.iso1.exon1.amp2_4583	-0.233974319	0.11348039	0.347454709	0.619608999	0.68425499	1.429212136	0.072209311	0.933789205	FALSE
1724	PF3D7_1134300.iso1.exon1.amp3_4228	-0.59590126	0.05178262	0.64768388	0.462423301	0.816808745	1.766810159	0.111345534	0.921428022	FALSE
1725	PF3D7_1134500.s1_5988	-0.435233862	-0.473522277	-0.038288415	0.881915773	0.767587333	0.470822897	-0.008617577	0.985408067	FALSE
1726	PF3D7_1134500.s2_6572	-1.082921677	-1.009336774	0.073584902	0.866288239	0.723085029	0.883191372	0.016515566	0.985408067	FALSE
1727	PF3D7_1134700.e1_5101	-0.350593505	-0.826976402	-0.476382897	0.138604236	0.914590055	0.541189924	-0.090126543	0.897566462	FALSE
1728	PF3D7_1134700.e2s1_6257	-0.327814222	0.074366806	0.402181028	0.424354598	0.683262388	0.991291981	0.092584525	0.917134742	FALSE
1729	PF3D7_1134700.e2s2_6835	0.660546767	0.961145566	0.300598798	0.359339494	0.837535521	0.599818761	0.061505679	0.915060736	FALSE
1730	PF3D7_1135100.1o1_6774	-0.404927926	0.083157355	0.488085281	0.500321059	0.530475881	1.465611649	0.116352617	0.926395115	FALSE
1731	PF3D7_1135400.e1s1_5738	-0.379732273	-0.638144609	-0.258412336	0.066620108	0.624950004	0.176016625	-0.072736165	0.856893506	FALSE
1732	PF3D7_1136100.1o1_5019	-0.559602755	0.368030796	0.92763355	0.188133959	0.871094209	1.297579729	0.16656327	0.914975982	FALSE
1733	PF3D7_1136200.1o5_8797	-0.071735863	-0.241614798	-0.169878935	0.654011679	0.686692876	0.752222236	-0.040780636	0.933789205	FALSE
1734	PF3D7_1136200.5o5_9080	-0.168891738	0.484422141	0.653313879	0.34059544	0.927851465	1.327100528	0.111076563	0.915060736	FALSE
1735	PF3D7_1136300.e2s1_5389	0.486697794	0.274115215	-0.212582579	0.605128249	0.947879679	0.788746498	-0.038034189	0.933789205	FALSE
1736	PF3D7_1136500.1.e4s1_8282	-0.274902098	-0.560195995	-0.285293897	0.222532236	0.574367437	0.417332379	-0.085045357	0.915060736	FALSE
1737	PF3D7_1136600.iso1.exon1.amp1_4586	-0.679164333	-0.703767933	-0.0246036	0.879563876	0.511584661	0.290525795	-0.008335356	0.985408067	FALSE
1738	PF3D7_1136700.iso1.exon7.amp1_117	-0.414773334	-0.5830322	-0.168258866	0.400603791	0.468121055	0.374385496	-0.0611424	0.915060736	FALSE
1739	PF3D7_1136900.e1s1_7134	0.263704953	0.426634236	0.162929283	0.780225919	0.855678029	1.186348536	0.030224162	0.968889936	FALSE
1740	PF3D7_1136900.e2s1_4885	-0.398191824	-0.411637121	-0.013445298	0.944384142	0.382356537	0.383168012	-0.005859333	0.993268242	FALSE
1741	PF3D7_1137100_7714	-0.915766766	-0.226372004	0.689394763	0.134138345	0.557409956	0.819758595	0.193979537	0.893405987	FALSE
1742	PF3D7_1137300.1o1_6196	-0.249020964	-0.647620011	-0.398599048	0.032040583	0.907363195	0.183327023	-0.077459535	0.764497354	FALSE
1743	PF3D7_1137600 (renamed)_7629	0.368764073	0.026050469	-0.342713604	0.451232031	0.974376904	0.867990531	-0.059305118	0.920899767	FALSE
1744	PF3D7_1137600.1o2_7251	-0.647202265	-0.56959848	0.077603785	0.791988627	0.318885702	0.606148336	0.035706113	0.969245152	FALSE
1745	PF3D7_1137900.1o2_5315	-0.540590257	0.141458159	0.682048416	0.203875125	0.69385172	0.99477538	0.154994677	0.914975982	FALSE
1746	PF3D7_1137900.2o2_4737	-0.061551658	0.219466998	0.281018657	0.249862651	0.737495897	0.419496994	0.066037604	0.915060736	FALSE
1747	PF3D7_1138000.iso1.exon1.amp3_4227	-0.250053519	-0.133648809	0.11640471	0.776520623	0.666818502	0.827219559	0.028260672	0.968147545	FALSE
1748	PF3D7_1138100.1o1_8413	-0.510164835	-0.669764872	-0.159600037	0.201603326	0.511541422	0.180017671	-0.054732016	0.914975982	FALSE
1749	PF3D7_1138400.e1s2_7418	-0.406103885	-0.628978147	-0.222874262	0.372652199	0.665599305	0.454287269	-0.057541618	0.915060736	FALSE
1750	PF3D7_1138400.e1s3_5106	-0.092392735	0.27571926	0.368111995	0.477687852	0.719387787	1.028537953	0.080729105	0.925003338	FALSE
1751	PF3D7_1138400.e1s4_8575	0.768134055	0.03994046	-0.728193595	0.079609705	1.194480597	0.672902815	-0.105692731	0.862677656	FALSE
1752	PF3D7_1138400.e1s5_8576	0.10080744	0.285879732	0.185072292	0.704753911	0.792919308	0.981615453	0.037798717	0.947194631	FALSE
1753	PF3D7_1138800.3o7_5545	-0.120091588	-0.269085432	-0.148993845	0.691596508	0.787316136	0.735157244	-0.031767357	0.942793383	FALSE
1754	PF3D7_1139100.iso1.exon1.amp2_3640	-0.236598344	-0.254613391	-0.018015047	0.950513778	0.828503206	0.537859359	-0.003746431	0.99537408	FALSE
1755	PF3D7_1139200.iso1.exon2.amp1_3587	-0.43447637	-0.41300007	0.0214763	0.902736594	0.395830214	0.343043884	0.009170434	0.988992794	FALSE
1756	PF3D7_1139300.e2s1_8655	-0.132699738	0.377049812	0.50974955	0.142284322	0.907985346	0.59496024	0.096683152	0.904378076	FALSE
1757	PF3D7_1139300.e2s3_8649	1.008487368	1.352421716	0.343934348	0.622678782	0.972758294	1.409578257	0.055626945	0.933789205	FALSE
1758	PF3D7_1139500.1.e1s1_5751	0.280336512	0.178794576	-0.101541937	0.675161219	0.796327622	0.423130295	-0.022153751	0.937668182	FALSE
1759	PF3D7_1140000.2o2_8125	-0.37875592	-0.532601486	-0.153845566	0.604049069	0.721276943	0.563752159	-0.036343654	0.933789205	FALSE
1760	PF3D7_1140100 (renamed)_5564	-0.34290627	1.032501252	1.375407522	0.145766517	0.909045187	1.702036389	0.223028634	0.912603236	FALSE
1761	PF3D7_1140500.e1s1_7204	-0.611580497	-0.662232867	-0.05065237	0.737034643	0.423260512	0.279454658	-0.020601355	0.958555259	FALSE
1762	PF3D7_1140900.3o6_8819	-0.6228407	-0.637456101	-0.014615402	0.941543554	0.544329826	0.373899285	-0.004612432	0.992411159	FALSE
1763	PF3D7_1140900.5o6_9108	-0.642028374	-0.104341854	0.537686521	0.345984594	0.426957241	1.120525875	0.163192721	0.915060736	FALSE
1764	PF3D7_1141200.iso1.exon1.amp1_2920	-0.392869851	-0.561735221	-0.16886537	0.10758186	0.269520818	0.176727263	-0.10789608	0.881162544	FALSE
1765	PF3D7_1141400.5o5_5552	-0.443519532	-0.615267236	-0.171747704	0.34468759	0.683687086	0.286816245	-0.043927182	0.915060736	FALSE
1766	PF3D7_1141900.1o1_6461	-0.607952388	-0.345633719	0.262318669	0.318284558	0.710260502	0.47157046	0.063560793	0.915060736	FALSE
1767	PF3D7_1142800_7136	-0.054162111	-0.182808172	-0.128646061	0.805307031	0.996474495	1.03881591	-0.021413868	0.975412922	FALSE
1768	PF3D7_1142900.e2_6836	-0.470455756	-0.192304825	0.278150931	0.237758309	0.316640607	0.442320494	0.139233055	0.915060736	FALSE
1769	PF3D7_1143000.iso1.exon1.amp1_3893	-0.572894014	-0.510360248	0.062533766	0.469618455	0.282680558	0.149224999	0.03844221	0.921428022	FALSE
1770	PF3D7_1143100.iso1.exon1.amp2_1039	-0.467355692	-0.059275668	0.408080023	0.097690008	0.474235305	0.421758017	0.145112227	0.875552328	FALSE
1771	PF3D7_1143300.1o1_4684	-0.266814772	-0.617618957	-0.350804185	0.29022324	0.638893763	0.620822457	-0.091798304	0.915060736	FALSE
1772	PF3D7_1143900.iso1.exon2.amp1_1547	-0.43971306	-0.545683578	-0.105970518	0.763371935	0.750445563	0.689938644	-0.023740012	0.965491612	FALSE
1773	PF3D7_1144200.iso1.exon2.amp1_2141	-0.525028308	-0.290252856	0.234775452	0.392970773	0.440300871	0.533469012	0.086645207	0.915060736	FALSE
1774	PF3D7_1144500.1o1_6422	-0.640900108	-0.713687536	-0.072787428	0.568941874	0.42060644	0.221631525	-0.030074381	0.933789205	FALSE
1775	PF3D7_1144600.iso1.exon1.amp1_3019	-0.783402804	-0.315136523	0.468266281	0.391098465	0.655144916	1.073386258	0.109333108	0.915060736	FALSE
1776	PF3D7_1145200.iso1.exon1.amp1_1399	-0.509391637	-0.510670795	-0.001279158	0.993741942	0.52130205	0.290379052	-0.000425596	0.998822427	FALSE
1777	PF3D7_1145200.iso1.exon1.amp3_2211	-0.307097205	-0.266644488	0.040452717	0.886714719	0.5815046	0.561797811	0.011637425	0.985408067	FALSE
1778	PF3D7_1145400.e1s1_8368	-0.496438908	0.083374835	0.579813743	0.309996415	0.437321356	1.11037876	0.174410539	0.915060736	FALSE
1779	PF3D7_1145500.2o2_8228	-0.706697187	-0.993388079	-0.286690893	0.04357838	0.441890281	0.21811396	-0.112982219	0.820092469	FALSE
1780	PF3D7_1145900.iso1.exon2.amp1_376	-0.522995262	-0.21926349	0.303731771	0.207783348	0.212240635	0.450456983	0.202347567	0.914975982	FALSE
1781	PF3D7_1146000.1o1_8205	0.123007636	0.41202364	0.289016004	0.350924354	1.014928224	0.526718007	0.049513245	0.915060736	FALSE
1782	PF3D7_1146500.1o1_8151	-0.359382346	-0.670334156	-0.31095181	0.139972725	0.838947585	0.305769035	-0.06498412	0.900191564	FALSE
1783	PF3D7_1146700.iso1.exon1.amp1_3331	-0.517832063	-0.140700842	0.377131221	0.098283663	0.960407012	0.309296457	0.068970775	0.875552328	FALSE
1784	PF3D7_1146800.e3s1_4831	0.303135801	-0.001308336	-0.304444137	0.32106929	0.760392418	0.560331205	-0.068491107	0.915060736	FALSE
1785	PF3D7_1147200.iso1.exon1.amp3_4233	-0.325987033	-0.596843739	-0.270856706	0.197806693	0.68655986	0.347191477	-0.068652041	0.914975982	FALSE
1786	PF3D7_1147800.1.e2s1_5119	-0.675195781	-0.317440451	0.35775533	0.504225584	0.387582817	1.08489206	0.115979525	0.926395115	FALSE
1787	PF3D7_1147800.iso2.exon1.amp1_325	-0.511600474	-0.448608713	0.062991762	0.736876945	0.681497149	0.311167052	0.016130893	0.958555259	FALSE
1788	PF3D7_1148900.iso1.exon1.amp1_1825	-0.549878895	-0.19625167	0.353627225	0.414217365	0.413663312	0.86034378	0.12174861	0.917134742	FALSE
1789	PF3D7_1149000.e1s1_5748	-0.311799514	0.272481737	0.584281251	0.261860934	0.586118032	0.990908819	0.151261132	0.915060736	FALSE
1790	PF3D7_1149000.s4 (renamed)_8579	-0.401284194	0.719825305	1.121109499	0.101481636	1.063295488	1.182562268	0.173460493	0.875552328	FALSE
1791	PF3D7_1149000.s6 (renamed)_7423	0.073447044	-0.65352988	-0.726976924	0.14927892	1.053559668	0.889312897	-0.116885288	0.913650462	FALSE
1792	PF3D7_1149100.iso2.exon1.amp1_4097	-0.37503356	-0.545400764	-0.170367204	0.387055772	0.746332103	0.310804544	-0.039922879	0.915060736	FALSE
1793	PF3D7_1149100.iso2.exon2.amp1_3610	-0.594001534	-0.594963267	-0.000961733	0.995260293	0.273419955	0.327193616	-0.000572653	0.998822427	FALSE
1794	PF3D7_1149200.e2s1_6829	0.461367822	0.575588884	0.114221062	0.772907372	1.193873985	0.717822952	0.016543043	0.967098183	FALSE
1795	PF3D7_1149200.e2s2_6546	-0.810735481	-0.428606334	0.382129148	0.482522592	0.779020853	1.078602224	0.077882647	0.925003338	FALSE
1796	PF3D7_1149500.3o4_7655	0.045366693	-0.344626355	-0.389993048	0.203107594	1.150313242	0.472413425	-0.059311013	0.914975982	FALSE
1797	PF3D7_1149500.e2_6825	-0.296855463	0.11231238	0.409167842	0.249502819	0.506419817	0.66858831	0.129423924	0.915060736	FALSE
1798	PF3D7_1149900.iso1.exon2.amp1_4166	0.397626603	0.804049495	0.406422892	0.660057807	1.376451023	1.862064439	0.047087874	0.935559505	FALSE
1799	PF3D7_1150000.iso1.exon2.amp1_3314	-0.379308766	0.300459462	0.679768228	0.0744933	0.753971387	0.636863229	0.152714456	0.862677656	FALSE
1800	PF3D7_1150200.iso1.exon1.amp1_412	0.302396125	0.462622531	0.160226405	0.638859287	0.83890695	0.649119294	0.032566679	0.933789205	FALSE
1801	PF3D7_1150300.iso1.exon1.amp1_2740	-0.555138563	-0.408445824	0.146692739	0.668119696	0.631660271	0.678502793	0.03837903	0.936894427	FALSE
1802	PF3D7_1150400.iso1.exon2.amp1_714	0.873827499	1.071606095	0.197778596	0.644366364	1.120887575	0.804129605	0.030234539	0.933789205	FALSE
1803	PF3D7_1200100.iso1.exon1.amp2_794	-0.011922279	0.018861607	0.030783885	0.902914996	0.847562781	0.43921798	0.00631549	0.988992794	FALSE
1804	PF3D7_1200200.iso1.exon1.amp1_2148	-0.228109861	0.422162152	0.650272013	0.465708914	0.789699856	1.789432848	0.113604247	0.921428022	FALSE
1805	PF3D7_1200300.e2s1_7189	0.202926461	1.512757525	1.309831064	0.08555478	1.016818623	1.295666314	0.207621012	0.866049105	FALSE
1806	PF3D7_1200400.iso1.exon1.amp2_776	-0.428752106	-0.257093466	0.171658641	0.742286856	0.694481838	1.064105543	0.038419552	0.960360308	FALSE
1807	PF3D7_1200400.iso1.exon2.amp1_720	0.311015158	1.575089988	1.264074829	0.05808746	1.056328995	1.092487798	0.19867752	0.844903507	FALSE
1808	PF3D7_1200500.iso1.exon1.amp1_2436	-0.361034357	0.313476894	0.674511251	0.235115666	0.73103797	1.066886955	0.144949569	0.915060736	FALSE
1809	PF3D7_1200600.iso1.exon2.amp3_2805	-0.698686837	-0.267053131	0.431633705	0.377633417	0.809470865	0.944887399	0.087133805	0.915060736	FALSE
1810	PF3D7_1200800.iso1.exon2.amp1_4209	-0.600090767	-0.34001197	0.260078797	0.459743938	0.458400903	0.698001331	0.088311971	0.920899767	FALSE
1811	PF3D7_1201200.2o2_4660	-0.724293709	0.292327387	1.016621096	0.046779528	1.011791354	0.82159562	0.170724093	0.830402251	FALSE
1812	PF3D7_1201300.1o1_7539	-0.333634206	-0.031228387	0.30240582	0.313740382	0.727455601	0.549478495	0.070998551	0.915060736	FALSE
1813	PF3D7_1201300_8869	-0.368498295	-0.221074267	0.147424028	0.280242222	0.593178386	0.186720893	0.043665148	0.915060736	FALSE
1814	PF3D7_1201400.iso1.exon1.amp1_218	0.997421144	1.804764013	0.807342869	0.142229563	1.198979309	0.963382166	0.114503398	0.904378076	FALSE
1815	PF3D7_1201400.iso1.exon1.amp2_2193	0.262283326	0.673933794	0.411650468	0.386839216	1.171386246	0.880037283	0.060041224	0.915060736	FALSE
1816	PF3D7_1202200_6847	-0.729987289	-0.666799797	0.063187492	0.843980224	0.586759593	0.642765349	0.01775198	0.981270492	FALSE
1817	PF3D7_1202300.e14s1_9188	-0.722808249	-0.873039686	-0.150231437	0.501636353	0.528530615	0.423002069	-0.048349311	0.926395115	FALSE
1818	PF3D7_1202300.e31s1_7502	-0.002475811	0.174600244	0.177076056	0.795047215	0.941704037	1.390469805	0.029467106	0.970532169	FALSE
1819	PF3D7_1202300.e33s1_5173	-0.24756993	0.247182947	0.494752877	0.243632247	0.519974111	0.800513156	0.147735327	0.915060736	FALSE
1820	PF3D7_1202300.e34s1_6594	-0.415767817	-0.558908187	-0.143140369	0.269742946	0.461558191	0.209241246	-0.054131838	0.915060736	FALSE
1821	PF3D7_1202600.e1_8857	-0.281316288	0.217776012	0.4990923	0.42484419	0.954920627	1.224337243	0.084150736	0.917134742	FALSE
1822	PF3D7_1203700.e3_8270	-0.43634075	0.428875561	0.86521631	0.057210796	0.366383592	0.73682915	0.340223923	0.844903507	FALSE
1823	PF3D7_1203900 (renamed)_7587	-0.216245762	0.158262548	0.37450831	0.468451515	0.786141154	1.018443053	0.076565151	0.921428022	FALSE
1824	PF3D7_1204300_6840	-0.509723215	-0.015835062	0.493888153	0.185853034	0.424681231	0.68751873	0.178425044	0.914975982	FALSE
1825	PF3D7_1205100.iso1.exon1.amp1_152	-0.525450236	-0.378743495	0.146706741	0.550634769	0.699743272	0.448374846	0.036146662	0.933789205	FALSE
1826	PF3D7_1205400.iso1.exon1.amp2_488	-0.597403098	-0.373448576	0.223954522	0.496901839	0.521822156	0.650916465	0.069417599	0.926395115	FALSE
1827	PF3D7_1205500.e1s1_6267	-0.631124952	-0.620569137	0.010555815	0.971166703	0.51513254	0.58792958	0.003359236	0.998686155	FALSE
1828	PF3D7_1205500.e1s2_5111	-0.549049763	-0.792772264	-0.243722501	0.200043594	0.703019271	0.29587634	-0.060617499	0.914975982	FALSE
1829	PF3D7_1205800.3o4_5646	-0.664325955	-0.807889794	-0.143563839	0.36527328	0.589988501	0.252704694	-0.042530752	0.915060736	FALSE
1830	PF3D7_1206000.1o1_7583	-0.594969478	-0.679807823	-0.084838345	0.486350493	0.367365793	0.217149149	-0.039960962	0.926395115	FALSE
1831	PF3D7_1206100.e2s1_6587	-0.678681331	0.299015712	0.977697043	0.198438167	0.548938305	1.41586023	0.232644561	0.914975982	FALSE
1832	PF3D7_1206600.iso1.exon1.amp1_261	-0.535040943	-0.487205116	0.047835827	0.651545801	0.276443038	0.198990502	0.029644563	0.933789205	FALSE
1833	PF3D7_1206900 (renamed, has duplicates)_7621	-0.458283955	-0.076231399	0.382052556	0.531596736	0.755763395	1.226358526	0.077513585	0.933789205	FALSE
1834	PF3D7_1206900.4o4_7049	0.308946277	1.261245429	0.952299152	0.224800824	0.750332113	1.475655849	0.184206481	0.915060736	FALSE
1835	PF3D7_1207000.e3s1_7223	-0.482358373	-0.230605645	0.251752728	0.463954868	0.616949613	0.669457403	0.067349321	0.921428022	FALSE
1836	PF3D7_1207200.iso1.exon1.amp3_2782	-0.531003135	-0.435230118	0.095773016	0.742875003	0.539785571	0.581439507	0.029311449	0.960360308	FALSE
1837	PF3D7_1207400.2o2_8755	-0.847578337	-0.163128527	0.68444981	0.287532668	0.550737851	1.240962985	0.171833809	0.915060736	FALSE
1838	PF3D7_1207500.e3s1_6870	-0.551821315	-0.658565203	-0.106743888	0.526681412	0.319245916	0.329338911	-0.055529303	0.933745911	FALSE
1839	PF3D7_1207600.1o1_4730	-0.167274743	-0.06172033	0.105554413	0.616831594	0.625109972	0.381983005	0.029176892	0.933789205	FALSE
1840	PF3D7_1208000.iso1.exon1.amp1_342	-0.538918237	-0.396198133	0.142720105	0.698606147	0.352952518	0.757838354	0.056934792	0.944376151	FALSE
1841	PF3D7_1208100 (renamed, has duplicates)_7883	-0.720476774	-0.649999017	0.070477757	0.704991153	0.517144433	0.345320027	0.023447024	0.947194631	FALSE
1842	PF3D7_1208100.e2s1_5771	-0.554590582	-0.217493892	0.337096689	0.359353142	0.777137686	0.692513251	0.073136049	0.915060736	FALSE
1843	PF3D7_1208100.e2s2_5482	0.100353673	-0.578460906	-0.678814579	0.009127189	1.047494767	0.330780088	-0.113850344	0.481114739	FALSE
1844	PF3D7_1208500.iso1.exon1.amp2_seg1_1423	-0.686447951	-0.439644029	0.246803923	0.563871145	0.411997225	0.868528237	0.084907652	0.933789205	FALSE
1845	PF3D7_1208800.e1s1_6623	0.274206484	0.396382984	0.1221765	0.877212181	1.094512637	1.617236682	0.017490147	0.985408067	FALSE
1846	PF3D7_1208900.s1_5377	-0.573259451	-0.028028665	0.545230786	0.190205423	0.574794327	0.76500261	0.151726323	0.914975982	FALSE
1847	PF3D7_1209400.e1s1_8090	-0.11858456	0.123147175	0.241731735	0.653329125	0.821319144	1.082385106	0.047161163	0.933789205	FALSE
1848	PF3D7_1209500.1.3o3_5905	-0.457415518	-0.625642342	-0.168226824	0.034742815	0.272025901	0.11758253	-0.108067946	0.779350831	FALSE
1849	PF3D7_1209500.iso2.exon2.amp1_3320	-0.297424061	-0.361172492	-0.063748432	0.593241712	0.652327962	0.073936985	-0.017261562	0.933789205	FALSE
1850	PF3D7_1209900.1o1_8507	-0.983786173	-0.747613789	0.236172384	0.593685717	0.526712851	0.896385564	0.067918158	0.933789205	FALSE
1851	PF3D7_1210100.1o1_7277	-0.201459008	-0.226661596	-0.025202588	0.892060576	0.617026768	0.324857713	-0.00709855	0.987698579	FALSE
1852	PF3D7_1210600.iso1.exon1.amp1_4021	0.320219888	0.100233434	-0.219986454	0.554365713	0.887714987	0.706556165	-0.042169549	0.933789205	FALSE
1853	PF3D7_1210600.iso1.exon1.amp2_4535	-0.415409372	-0.540624679	-0.125215307	0.67122583	0.713949959	0.563654782	-0.029862292	0.936977941	FALSE
1854	PF3D7_1211000.e3s1_5406	-0.4635036	-0.583179834	-0.119676235	0.395788121	0.556670583	0.215627511	-0.037653013	0.915060736	FALSE
1855	PF3D7_1211000.e3s2_8300	0.04917603	0.476557494	0.427381464	0.251165276	0.721896929	0.688997584	0.099162845	0.915060736	FALSE
1856	PF3D7_1211300.e2s1_4865	-0.563337003	-0.546208821	0.017128182	0.939787776	0.268728085	0.467578881	0.009596873	0.992371014	FALSE
1857	PF3D7_1211600.iso1.exon1.amp2_2832	-0.438390037	-0.640703849	-0.202313812	0.223044989	0.575055873	0.268989105	-0.061359422	0.915060736	FALSE
1858	PF3D7_1211900.e1s1_5489	0.532413631	0.450361443	-0.082052189	0.873385241	0.875974726	1.038354616	-0.01527168	0.985408067	FALSE
1859	PF3D7_1211900.e2s1_8064	-0.732548582	-0.656655556	0.075893027	0.816320656	0.423308872	0.669135917	0.027666025	0.978189367	FALSE
1860	PF3D7_1212000 (renamed)_7876	-0.11471001	-0.36794227	-0.253232259	0.482258148	1.1955684	0.618589583	-0.03683173	0.925003338	FALSE
1861	PF3D7_1212000.e2s1_5966	-0.460402408	-0.710721909	-0.250319501	0.026849229	0.396315464	0.163071035	-0.110492066	0.731203283	FALSE
1862	PF3D7_1212400.1o1_5266	-0.410916301	-0.858286864	-0.447370563	0.008528833	0.52963798	0.238689695	-0.147458324	0.468918579	FALSE
1863	PF3D7_1212500.1o1_4735	-0.793424127	-0.462560202	0.330863925	0.235255612	0.376418165	0.522768058	0.139476636	0.915060736	FALSE
1864	PF3D7_1212700.s1_9130	-0.664336008	-0.48332689	0.181009119	0.55476099	0.614207841	0.596732195	0.049271016	0.933789205	FALSE
1865	PF3D7_1212800_6558	-0.462543359	0.09007921	0.55262257	0.022425564	0.582856231	0.366814841	0.163605982	0.691003087	FALSE
1866	PF3D7_1212900.e1s1_8355	0.49307891	0.160708632	-0.332370278	0.480467182	0.888470562	0.915340362	-0.062137172	0.925003338	FALSE
1867	PF3D7_1213400.e1s1_8061	0.181090514	-0.22895727	-0.410047785	0.230750957	0.821720252	0.614151931	-0.085286252	0.915060736	FALSE
1868	PF3D7_1213500.1o2_5618	-0.813394395	-0.727484556	0.085909838	0.745147455	0.641992095	0.506620551	0.022785607	0.960748063	FALSE
1869	PF3D7_1214000.iso1.exon2.amp1_2096	-0.25763703	-0.395676229	-0.138039198	0.315369592	0.327328385	0.252470097	-0.071923043	0.915060736	FALSE
1870	PF3D7_1215100.e1s1_8868	-0.236116458	0.114405837	0.350522296	0.49682435	0.642753202	1.030898931	0.08385983	0.926395115	FALSE
1871	PF3D7_1215200.iso1.exon1.amp1_1558	-0.09411139	0.2758718	0.36998319	0.489978838	0.600979663	1.073844749	0.092007669	0.926395115	FALSE
1872	PF3D7_1215400.1o1_8489	-0.354729117	-0.705208333	-0.350479215	0.07652988	0.780378007	0.28126411	-0.078756167	0.862677656	FALSE
1873	PF3D7_1215900.1o1_5893	-0.500085415	-0.426755099	0.073330316	0.733360194	0.613369865	0.396951925	0.020601812	0.957663815	FALSE
1874	PF3D7_1216300.iso1.exon1.amp1_2121	-0.184665659	-0.715512796	-0.530847137	0.002428869	0.774730093	0.1890143	-0.120679743	0.31337836	FALSE
1875	PF3D7_1216500.e1s1_7177	-0.487497562	0.057046927	0.544544489	0.129472862	0.311679897	0.6386862	0.25010966	0.883745191	FALSE
1876	PF3D7_1216600_6846	0.217678954	1.094743906	0.877064952	0.154498383	1.067137541	1.10220836	0.136475324	0.914975982	FALSE
1877	PF3D7_1216900.e1s1_6556	-0.558947886	-0.761363032	-0.202415146	0.209230347	0.752610579	0.194300855	-0.047347391	0.915060736	FALSE
1878	PF3D7_1217900.3o3_5875	-0.339630956	-0.068080545	0.27155041	0.519001083	0.73609954	0.827719657	0.060600284	0.927464915	FALSE
1879	PF3D7_1218200.e1s2_6823	-0.595673156	0.047562605	0.64323576	0.323969984	0.537244808	1.271890626	0.162301643	0.915060736	FALSE
1880	PF3D7_1218500.e3s1_4808	-0.566365413	-0.680071277	-0.113705865	0.444993285	0.389462601	0.274356364	-0.050081061	0.919099687	FALSE
1881	PF3D7_1218600.e2s1_6329	-0.61035983	-0.412754756	0.197605075	0.547408208	0.273469514	0.667639091	0.09669685	0.933789205	FALSE
1882	PF3D7_1219000.iso1.exon1.amp1_seg1_4603	0.113079794	0.35933688	0.246257086	0.384507117	0.710727596	0.521841798	0.059285631	0.915060736	FALSE
1883	PF3D7_1219100.e1s1_9152	-0.463666354	-0.571339562	-0.107673208	0.444523003	0.737702821	0.120436745	-0.025758997	0.919099687	FALSE
1884	PF3D7_1219100.e1s2_9153	-0.606581544	-0.255660148	0.350921396	0.337564555	0.550050211	0.70456241	0.102736035	0.915060736	FALSE
1885	PF3D7_1219300.iso1.exon1.amp1_4486	-0.163774296	0.925173632	1.088947928	0.243315534	0.905830903	1.768617076	0.174889994	0.915060736	FALSE
1886	PF3D7_1219600.iso1.exon3.amp1_2541	-0.175962616	0.299645732	0.475608348	0.261350848	0.700737826	0.794425658	0.111369577	0.915060736	FALSE
1887	PF3D7_1219600.iso1.exon3.amp2_2830	-0.272466733	0.839907948	1.112374681	0.005816972	0.750439832	0.545838849	0.253778531	0.410424048	FALSE
1888	PF3D7_1219700.e1s1_6308	-0.540335583	-0.79682371	-0.256488127	0.129285025	0.595055834	0.264154799	-0.075274947	0.883745191	FALSE
1889	PF3D7_1219800.iso1.exon1.amp1_616	-0.766439482	-0.786568439	-0.020128957	0.886335158	0.430485649	0.254883677	-0.008090488	0.985408067	FALSE
1890	PF3D7_1219900.1o1_5820	-0.375511798	-0.488174124	-0.112662326	0.495124749	0.505373547	0.293006038	-0.038605888	0.926395115	FALSE
1891	PF3D7_1220100.1o1_7044	-0.259694098	-0.044464647	0.215229451	0.52200497	0.497168503	0.668633917	0.069113373	0.928155952	FALSE
1892	PF3D7_1220300.iso1.exon1.amp1_2695	-0.404906378	-0.112515335	0.292391043	0.451047593	0.319604015	0.777832237	0.122589767	0.920899767	FALSE
1893	PF3D7_1220600.2o4_7295	-0.265880094	-0.394266484	-0.12838639	0.513178475	0.664382776	0.334827515	-0.033630926	0.926395115	FALSE
1894	PF3D7_1221000.e1s1_8662	-0.267011001	-0.203000842	0.064010158	0.868166607	0.818158422	0.759041742	0.01314157	0.985408067	FALSE
1895	PF3D7_1221000.e1s3_4910	0.656068539	0.761130114	0.105061574	0.815541631	1.073661451	0.868650644	0.016631209	0.978189367	FALSE
1896	PF3D7_1221300.iso1.exon6.amp1_1262	0.061703453	0.72774949	0.666046037	0.269186807	0.841932746	1.142645055	0.126083195	0.915060736	FALSE
1897	PF3D7_1221400.e1s1_6610	-0.090797463	0.147505021	0.238302484	0.573696797	0.912837581	0.818687794	0.043990227	0.933789205	FALSE
1898	PF3D7_1221500.1o1_6483	-0.299248566	-0.745599013	-0.446350448	0.007793557	0.654653455	0.216315313	-0.119714288	0.450767168	FALSE
1899	PF3D7_1221600.1o1_4708	0.255871249	0.448704066	0.192832817	0.595267586	0.874847412	0.690469691	0.037531138	0.933789205	FALSE
1900	PF3D7_1221900.1o1_9091	-0.438284421	-0.654754407	-0.216469987	0.469595479	0.849642063	0.5422594	-0.043934202	0.921428022	FALSE
1901	PF3D7_1222300.e1s1_9154	-0.973502351	-0.379116377	0.594385974	0.150903679	1.093548088	0.710252834	0.093647701	0.913650462	FALSE
1902	PF3D7_1222600 (renamed, has duplicates)_6843	1.485481115	1.904577823	0.419096708	0.378510302	0.948902352	0.905133303	0.073982143	0.915060736	FALSE
1903	PF3D7_1222600.e1s1_5687	-0.39771372	-0.303850171	0.09386355	0.751568485	0.585474269	0.586574784	0.026714506	0.962376195	FALSE
1904	PF3D7_1222700.1o1_8121	-0.365080259	0.612817588	0.977897847	0.092381031	0.892796617	0.994963005	0.180147748	0.874701525	FALSE
1905	PF3D7_1223100.e3s1_6322	-0.689615189	-0.435524983	0.254090206	0.399831148	0.430471279	0.590285421	0.093891843	0.915060736	FALSE
1906	PF3D7_1223600.1o2_8535	-0.036838618	0.062952849	0.099791467	0.866365756	1.091321611	1.187114783	0.015087325	0.985408067	FALSE
1907	PF3D7_1223600.e1_5670	0.367864056	0.714727964	0.346863908	0.553459721	1.162986988	1.140736546	0.04981376	0.933789205	FALSE
1908	PF3D7_1223600.e2s1_8263	-0.445871545	-0.524927792	-0.079056247	0.769935153	0.542384895	0.534201763	-0.024333305	0.966343362	FALSE
1909	PF3D7_1223700.1o2_5258	0.161584191	0.540963735	0.379379544	0.445359955	0.93788395	0.961176669	0.067230079	0.919099687	FALSE
1910	PF3D7_1223800.iso1.exon1.amp1_short_2872	-0.325496177	-0.092555359	0.232940818	0.549456019	0.442059667	0.785481768	0.078878005	0.933789205	FALSE
1911	PF3D7_1223900.iso1.exon1.amp1_106	-0.542348354	-0.738252959	-0.195904605	0.238490831	0.599914142	0.264422052	-0.057038787	0.915060736	FALSE
1912	PF3D7_1224200.1o5_7077	-0.421409657	-0.339439193	0.081970464	0.784172755	0.374586433	0.61304542	0.033482782	0.969245152	FALSE
1913	PF3D7_1224500.2o2_4969	0.389098427	0.489959523	0.100861096	0.775104909	0.994071695	0.654307158	0.017469431	0.968147545	FALSE
1914	PF3D7_1225600.e2s1_7774	-0.45005882	-0.754104004	-0.304045184	0.079655766	0.548504209	0.274686252	-0.096489564	0.862677656	FALSE
1915	PF3D7_1226000.e1_5411	-0.216986177	-0.062851913	0.154134263	0.513782894	0.612623933	0.439160889	0.043113328	0.926395115	FALSE
1916	PF3D7_1226100.1o1_4971	-0.418403957	-0.426742784	-0.008338827	0.970918454	0.552286292	0.441349734	-0.002568554	0.998686155	FALSE
1917	PF3D7_1226300.e1s1_6601	-0.626153306	-0.770360807	-0.144207501	0.182732385	0.337549675	0.180713162	-0.074204713	0.914975982	FALSE
1918	PF3D7_1226400.iso1.exon3.amp1_1587	-0.40835507	0.100835561	0.509190631	0.312005934	0.581196779	0.972833607	0.1332846	0.915060736	FALSE
1919	PF3D7_1226800.2o5_6721	-0.596212314	-0.529691056	0.066521258	0.834718745	0.433293986	0.651833481	0.023961171	0.980022573	FALSE
1920	PF3D7_1227100.e1s1_4898	-0.071899759	0.063406689	0.135306448	0.739098029	0.839606491	0.79875547	0.027001901	0.959458737	FALSE
1921	PF3D7_1227200.iso1.exon1.amp2_815	-0.272613298	-0.103327096	0.169286202	0.631792175	0.82836686	0.677104706	0.03470611	0.933789205	FALSE
1922	PF3D7_1227300.e1s2_8357	-0.609021924	-0.368568096	0.240453827	0.647477285	0.440811746	1.079855143	0.07289014	0.933789205	FALSE
1923	PF3D7_1227500.2o2_5357	-0.244836583	-0.462747426	-0.217910844	0.582245344	0.927324883	0.756551488	-0.039913299	0.933789205	FALSE
1924	PF3D7_1228100.iso1.exon2.amp1_2994	-0.045015256	0.616567947	0.661583203	0.200019707	0.884080226	0.945215245	0.123741805	0.914975982	FALSE
1925	PF3D7_1228100.iso1.exon3.amp1_2404	-0.534272405	-0.685545364	-0.151272959	0.226747603	0.556699666	0.164279981	-0.047776511	0.915060736	FALSE
1926	PF3D7_1228300.iso1.exon1.amp1_2480	-0.534933176	-0.248630086	0.28630309	0.261392179	0.475934006	0.474491921	0.1002938	0.915060736	FALSE
1927	PF3D7_1228400.s2_4794	-0.177814461	-0.375672451	-0.197857989	0.39154813	0.720295686	0.402280414	-0.047638956	0.915060736	FALSE
1928	PF3D7_1228600.e1s1_5187	-0.25313319	0.446747214	0.699880404	0.150864287	0.571965663	0.878501534	0.190091635	0.913650462	FALSE
1929	PF3D7_1228700.iso1.exon1.amp1_seg2_1438	-0.509790626	-0.602506683	-0.092716057	0.631372823	0.467518162	0.368296065	-0.033772114	0.933789205	FALSE
1930	PF3D7_1228800.e1s1_8000	-0.711370058	-0.629998008	0.08137205	0.731704059	0.558091029	0.457378588	0.024756509	0.957663815	FALSE
1931	PF3D7_1228800.e1s4_5484	-0.085290601	-0.092870429	-0.007579828	0.976380829	0.510693182	0.508759548	-0.002474745	0.998822427	FALSE
1932	PF3D7_1229300.1o1_8528	-0.284549968	-0.822721768	-0.538171799	0.040399486	1.042281132	0.360416478	-0.090602342	0.809964087	FALSE
1933	PF3D7_1229600.iso1.exon2.amp1_804	-0.194201445	0.108158318	0.302359763	0.617713419	1.066135954	1.20203122	0.046570828	0.933789205	FALSE
1934	PF3D7_1229600.iso1.exon2.amp2_1093	0.451744768	0.693668787	0.241924019	0.722058149	1.113905281	1.367361996	0.035219434	0.95750546	FALSE
1935	PF3D7_1230000.iso1.exon10.amp2_1646	-0.596788887	-0.527472268	0.069316619	0.742366635	0.502873494	0.405547557	0.023433172	0.960360308	FALSE
1936	PF3D7_1230000.iso1.exon2.amp1_2063	-0.653567395	-0.265108362	0.388459033	0.264312742	0.196831547	0.667976361	0.223365419	0.915060736	FALSE
1937	PF3D7_1230000.iso1.exon6.amp1_333	-0.509218643	-0.75057552	-0.241356876	0.061843016	0.493631967	0.185950946	-0.085676843	0.844903507	FALSE
1938	PF3D7_1230400.5o5_7268	-0.274746869	-0.520201026	-0.245454157	0.087161411	0.448766866	0.229133901	-0.095150538	0.874701525	FALSE
1939	PF3D7_1230600.iso1.exon1.amp1_71	-0.504212565	-0.628362533	-0.124149968	0.188743285	0.425438185	0.120767323	-0.051328537	0.914975982	FALSE
1940	PF3D7_1230700.1o1_6777	-0.236761919	-0.312289594	-0.075527674	0.684694856	0.593964647	0.328968384	-0.022059715	0.939278071	FALSE
1941	PF3D7_1231000.iso1.exon7.amp1_4124	-0.150707934	-0.345072675	-0.19436474	0.679371806	0.874870089	0.932511926	-0.036750494	0.93820426	FALSE
1942	PF3D7_1231400.iso1.exon4.amp1_924	-0.26848086	0.002565724	0.271046584	0.603556105	0.806801424	1.044447894	0.05400106	0.933789205	FALSE
1943	PF3D7_1231500.1o1_4656	-0.688384175	-0.927155523	-0.238771347	0.261761007	0.438582694	0.392644352	-0.091753519	0.915060736	FALSE
1944	PF3D7_1231600.iso1.exon1.amp2_1920	-0.58820204	-0.156506988	0.431695051	0.12218158	0.666868508	0.479057349	0.110914335	0.881162544	FALSE
1945	PF3D7_1232000.1o2_6457	-0.540234133	-0.388841174	0.151392959	0.76972173	0.742285682	1.051464105	0.032237603	0.966343362	FALSE
1946	PF3D7_1232100.e1_8842	-0.579166737	-0.017453323	0.561713415	0.146589211	0.566268308	0.692979085	0.160936893	0.912603236	FALSE
1947	PF3D7_1232100.e2_4807	-0.376157127	-0.14869059	0.227466537	0.639405535	0.700356869	0.978563439	0.051476276	0.933789205	FALSE
1948	PF3D7_1232600.iso1.exon1.amp1_709	-0.540593739	-0.543851977	-0.003258238	0.990954873	0.511129648	0.5782061	-0.001046297	0.998822427	FALSE
1949	PF3D7_1232700.iso1.exon1.amp1_3259	-0.650576574	-0.358267401	0.292309173	0.445567095	0.300582666	0.768100472	0.127560681	0.919099687	FALSE
1950	PF3D7_1233200.iso2.exon1.amp1_3096	-0.699505676	-0.945156169	-0.245650494	0.181775122	0.625340946	0.297343423	-0.068481621	0.914975982	FALSE
1951	PF3D7_1233200.iso2.exon1.amp2_seg2_2883	-0.712728265	-0.724506923	-0.011778658	0.954739292	0.591814362	0.384648137	-0.003428953	0.99537408	FALSE
1952	PF3D7_1233200.iso2.exon1.amp3_seg1_1729	-0.239547472	-0.576981528	-0.337434056	0.24122465	0.815961978	0.502166378	-0.07143307	0.915060736	FALSE
1953	PF3D7_1233300.s1_7401	0.024226869	-0.422418768	-0.446645637	0.002683874	0.754288934	0.098564131	-0.104565252	0.31337836	FALSE
1954	PF3D7_1233300.s2_5950	-0.461320165	0.072855448	0.534175613	0.19333658	0.464609645	0.759265661	0.175983172	0.914975982	FALSE
1955	PF3D7_1233400.1o4_5291	-0.115081702	0.088483001	0.203564703	0.775447959	0.991240147	1.45391476	0.032227806	0.968147545	FALSE
1956	PF3D7_1233600.e1s3_8293	-0.792418711	-0.633255358	0.159163353	0.721845617	0.381992372	0.922899501	0.056006104	0.95750546	FALSE
1957	PF3D7_1233700.iso1.exon1.amp1_1031	-0.503025168	0.07274159	0.575766757	0.112277065	0.420500567	0.634375054	0.213569594	0.881162544	FALSE
1958	PF3D7_1233800.3o3_4664	-0.530466044	-0.492734653	0.037731391	0.917069261	0.351653258	0.751670955	0.015132368	0.991159216	FALSE
1959	PF3D7_1234300.2o2_6755	-0.354404536	-0.386684096	-0.03227956	0.915350781	0.625258324	0.600729882	-0.008641333	0.991159216	FALSE
1960	PF3D7_1234600.iso1.exon1.amp1_2569	-0.483064436	-0.517033332	-0.033968896	0.805032245	0.451794796	0.241587873	-0.013059888	0.975412922	FALSE
1961	PF3D7_1234600.iso1.exon1.amp2_3083	-0.410987015	-0.333274273	0.077712742	0.787305648	0.939833659	0.506762655	0.014358681	0.969245152	FALSE
1962	PF3D7_1234700.iso1.exon2.amp1_2955	-0.006907588	-0.540055828	-0.533148239	0.009644983	0.723976063	0.282251754	-0.128962031	0.491718776	FALSE
1963	PF3D7_1234800.e1s1_7490	-0.648278889	-0.545613968	0.102664921	0.584442506	0.528223371	0.344432932	0.033479953	0.933789205	FALSE
1964	PF3D7_1234800.e1s2_8941	0.049362732	0.723388248	0.674025516	0.154984159	0.735682335	0.851810827	0.149888449	0.914975982	FALSE
1965	PF3D7_1235000.iso1.exon2.amp1_3863	-0.631931782	-0.720214492	-0.08828271	0.577117914	0.418920578	0.294936328	-0.036150569	0.933789205	FALSE
1966	PF3D7_1235000.iso1.exon3.amp1_650	0.630631594	0.888396696	0.257765102	0.458423394	1.20587983	0.582815877	0.037247358	0.920899767	FALSE
1967	PF3D7_1235200.iso1.exon2.amp1_3400	-0.484040917	-0.362646798	0.121394119	0.728698124	0.636088069	0.69767094	0.031454705	0.957663815	FALSE
1968	PF3D7_1235200.iso1.exon2.amp2_2539	-0.205443794	-0.110072271	0.095371523	0.765945696	0.669122851	0.629810363	0.023907326	0.966343362	FALSE
1969	PF3D7_1235400.e1s2_5177	-0.386459992	-0.499108142	-0.112648149	0.685871302	0.440411277	0.560102758	-0.041238865	0.939416436	FALSE
1970	PF3D7_1235800.iso1.exon4.amp1_2414	-0.409415001	0.08391144	0.493326441	0.075874543	0.772837182	0.451514151	0.110509317	0.862677656	FALSE
1971	PF3D7_1236000.1o1_6739	0.323705154	0.752466271	0.428761117	0.327529947	0.81386699	0.829668228	0.087612646	0.915060736	FALSE
1972	PF3D7_1236100.e2s1_7758	0.131241068	0.048847951	-0.082393117	0.905395245	1.147175463	1.402200772	-0.011654823	0.989757609	FALSE
1973	PF3D7_1236200.iso1.exon1.amp2_4226	-0.502257753	0.395253443	0.897511196	0.085071514	0.706342002	0.88591338	0.205337783	0.866049105	FALSE
1974	PF3D7_1236300.1o1_5000	-0.623530639	-0.618432064	0.005098575	0.979609076	0.472810475	0.386268463	0.001831414	0.998822427	FALSE
1975	PF3D7_1236500.1o1_7853	-0.070547712	-0.29624463	-0.225696919	0.425833174	0.856812605	0.501204173	-0.045600536	0.917134742	FALSE
1976	PF3D7_1237300.iso1.exon3.amp1_116	-0.456777682	-0.275179329	0.181598353	0.484264619	0.342506352	0.516732962	0.082698704	0.925615536	FALSE
1977	PF3D7_1237400.3o3_5573	-0.444968533	-0.515266269	-0.070297736	0.660296812	0.438732417	0.297000774	-0.02754679	0.935559505	FALSE
1978	PF3D7_1237400.e3_7403	-0.232325607	-0.103415862	0.128909745	0.731087342	0.557387818	0.75950894	0.036832539	0.957663815	FALSE
1979	PF3D7_1237900.iso1.exon1.amp1_4591	-0.631973546	-0.299023165	0.332950381	0.400169928	0.603432023	0.771436243	0.088881239	0.915060736	FALSE
1980	PF3D7_1238200.iso1.exon1.amp1_3886	-0.663640517	-0.7169018	-0.053261283	0.718935312	0.544142502	0.243700798	-0.017090182	0.956760614	FALSE
1981	PF3D7_1238400.iso1.exon4.amp1_630	-0.084945741	0.343955005	0.428900747	0.517202123	0.753727961	1.331231284	0.085323873	0.926395115	FALSE
1982	PF3D7_1238600.iso1.exon1.amp1_1581	-0.534411578	-0.193802936	0.340608642	0.549096811	0.721296144	1.142861348	0.07282834	0.933789205	FALSE
1983	PF3D7_1238800.e1s1_6061	0.313768436	0.297820602	-0.015947833	0.960857993	0.733998729	0.634451518	-0.003673188	0.996761306	FALSE
1984	PF3D7_1239200.e1s2_7139	-0.800438515	-0.755288937	0.045149577	0.908081421	0.73832538	0.781405291	0.010124558	0.990555727	FALSE
1985	PF3D7_1239400.1o1_5240	-0.93870811	-0.558456002	0.380252108	0.391838042	0.711360591	0.861784849	0.08686225	0.915060736	FALSE
1986	PF3D7_1239600.1o1_9028	-0.440343946	-0.535237577	-0.094893631	0.657278897	0.463214978	0.415845073	-0.034517301	0.935063433	FALSE
1987	PF3D7_1239700.e1s1_5983	0.253343662	0.426297859	0.172954198	0.628870007	0.824338425	0.687810806	0.035573868	0.933789205	FALSE
1988	PF3D7_1239800.s5_6570	0.711485881	0.686987025	-0.024498856	0.914116241	0.935365889	0.342416113	-0.004591788	0.991159216	FALSE
1989	PF3D7_1240000.iso1.exon1.amp1_735	-0.667863003	-0.7694112	-0.101548196	0.601707	0.600999551	0.346927804	-0.029265885	0.933789205	FALSE
1990	PF3D7_1240300.iso1.exon1.amp2_2520	-0.248983037	0.053709303	0.30269234	0.3707548	0.689470692	0.640767834	0.0737306	0.915060736	FALSE
1991	PF3D7_1240300.iso1.exon2.amp1_4487	0.521042481	1.471477677	0.950435197	0.19599354	1.121492617	1.350305767	0.137843916	0.914975982	FALSE
1992	PF3D7_1240400.iso1.exon2.amp1_1013	1.114369381	2.901587488	1.787218107	4.03E-06	1.109192439	0.398156755	0.282569983	0.003769105	TRUE
1993	PF3D7_1240600.iso1.exon2.amp1_2168	-0.218832302	0.229239001	0.448071303	0.205353735	0.715381373	0.641946371	0.105538046	0.914975982	FALSE
1994	PF3D7_1240900.iso1.exon3.amp1_1880	0.714679981	2.013883195	1.299203214	0.033053419	1.244488051	0.951828471	0.178150436	0.764497354	FALSE
1995	PF3D7_1240900.iso1.exon4.amp2_3972	-0.297305836	-0.067269467	0.23003637	0.669592165	0.719844538	1.093541539	0.049767448	0.936894427	FALSE
1996	PF3D7_1241300.iso1.exon1.amp1_2759	0.077425551	-0.342824604	-0.420250154	0.062302564	0.704107145	0.353067096	-0.103890114	0.844903507	FALSE
1997	PF3D7_1241400.iso1.exon1.amp2_seg2_276	-0.413119487	-0.49828865	-0.085169163	0.816040762	1.278650749	0.623432638	-0.011603708	0.978189367	FALSE
1998	PF3D7_1241700.e2s1_7179	-0.44088958	-0.597910615	-0.157021035	0.210586271	0.367478698	0.215078821	-0.073968382	0.915060736	FALSE
[truncated: 806 more rows]
