# Supplementary material for: Proteome-wide analysis of a malaria vaccine study reveals personalized humoral immune profiles in Tanzanian adults
Source: eLife. 2020 Jul 14;9:e53080. doi: 10.7554/eLife.53080 (PMC7386907; doi:10.7554/eLife.53080)
Supplement: Figure 5—source data 3. [file elife-53080-fig5-data3.csv]

baseline versus after immunization in protected group
	protein_ID	mean_seorpositivy_time1	mean_seorpositivy_time2	size_eff	log_FC	p_value	adj.p_value	is_threshold_reached
1	MAL13P1.303e4s1_6254	-0.882639966	-0.842898499	0.209215386	0.039741468	0.664264611	0.999821727	FALSE
2	MAL8P1.143_14o15_5934	0.983045831	1.078746409	0.098388126	0.095700578	0.836641035	0.999821727	FALSE
3	MAL8P1.143_3o15_6506	-0.062231348	-0.128061471	0.67250341	-0.065830123	0.207077207	0.999821727	FALSE
4	PF3D7_0100100.iso1.exon2.amp1_1871	1.055518195	0.992654176	0.108057283	-0.062864018	0.820953299	0.999821727	FALSE
5	PF3D7_0100200.iso1.exon1.amp1_706	0.476523049	0.50429338	0.092345289	0.027770331	0.846492704	0.999821727	FALSE
6	PF3D7_0100300.iso1.exon1.amp1_1010	0.261792071	0.169778297	0.14560561	-0.092013775	0.761058791	0.999821727	FALSE
7	PF3D7_0100300.iso1.exon2.amp1_1317	-0.327931238	-0.162454323	0.648989645	0.165476915	0.220353968	0.999821727	FALSE
8	PF3D7_0100400.iso1.exon2.amp1_991	1.2116595	1.318054238	0.299270422	0.106394738	0.540017426	0.999821727	FALSE
9	PF3D7_0100600.iso1.exon1.amp1_2163	1.8331633	2.023067416	0.137818669	0.189904116	0.773332871	0.999821727	FALSE
10	PF3D7_0100800.iso1.exon2.amp1_133	-0.109535136	-0.1139539	0.009038373	-0.004418763	0.984843478	0.999821727	FALSE
11	PF3D7_0100900.iso1.exon1.amp1_2446	1.449083047	1.547867626	0.315082123	0.098784579	0.519951205	0.999821727	FALSE
12	PF3D7_0101000.iso1.exon1.amp1_2157	-0.082886369	-0.052566171	0.195822535	0.030320198	0.684085521	0.999821727	FALSE
13	PF3D7_0101100.iso1.exon1.amp1_3004	-0.518811745	-0.412026858	0.164160612	0.106784887	0.73215872	0.999821727	FALSE
14	PF3D7_0101300.iso1.exon2.amp1_4146	1.040878322	1.157180075	0.253361996	0.116301753	0.60130662	0.999821727	FALSE
15	PF3D7_0101600.iso1.exon1.amp1_3887	0.8346916	0.849872534	0.013083218	0.015180935	0.978062688	0.999821727	FALSE
16	PF3D7_0101800.iso1.exon1.amp1_2719	1.113003733	1.284678037	0.244742619	0.171674304	0.613299985	0.999821727	FALSE
17	PF3D7_0101900.iso1.exon1.amp1_123	0.729741907	0.775347504	0.148409135	0.045605597	0.756660245	0.999821727	FALSE
18	PF3D7_0102200.e1s1_8021	-0.53136935	-0.671232197	0.181004401	-0.139862847	0.706379233	0.999821727	FALSE
19	PF3D7_0102200.e2s1_7477	1.059710245	1.207612555	0.06070921	0.14790231	0.898576554	0.999821727	FALSE
20	PF3D7_0102200.e2s2_7188	1.356026986	1.749273897	0.19249706	0.393246911	0.689056081	0.999821727	FALSE
21	PF3D7_0102500.e1s2_8945	-0.233657296	-0.195764059	0.02272553	0.037893236	0.961908616	0.999821727	FALSE
22	PF3D7_0102600.2o3_6170	-0.018358409	-0.068615652	0.246527409	-0.050257243	0.610804314	0.999821727	FALSE
23	PF3D7_0102700.2o2_7571	-0.392000789	-0.410990225	0.228744317	-0.018989436	0.635950905	0.999821727	FALSE
24	PF3D7_0103400.e1s1_5925	-0.285566032	-0.156303418	0.117585961	0.129262614	0.805591896	0.999821727	FALSE
25	PF3D7_0103500.2o7_7085	-0.326955236	-0.194795821	0.084207678	0.132159415	0.859812924	0.999821727	FALSE
26	PF3D7_0103800.e4s1_7155	-0.489735014	-0.484258362	0.012114247	0.005476653	0.979686896	0.999821727	FALSE
27	PF3D7_0103900.1o1_9076	-0.022315344	0.046521273	0.04135219	0.068836617	0.930773522	0.999821727	FALSE
28	PF3D7_0104000.3o3_6106	-0.15077931	-0.122860618	0.063476953	0.027918692	0.893990374	0.999821727	FALSE
29	PF3D7_0104100.1o2_5053	-0.763172692	-0.743134597	0.141074161	0.020038095	0.768191403	0.999821727	FALSE
30	PF3D7_0104100.2o2_5342	0.102961547	0.215506124	0.078206053	0.112544577	0.869673404	0.999821727	FALSE
31	PF3D7_0104600.e1s1_7213	-0.743770478	-0.664690132	0.052242694	0.079080346	0.912634537	0.999821727	FALSE
32	PF3D7_0105600.e2_4833	-0.648073479	-0.589942695	0.093516329	0.058130783	0.844580828	0.999821727	FALSE
33	PF3D7_0105700.iso1.exon1.amp2_233	-0.298706925	-0.09405433	0.140622208	0.204652596	0.76890433	0.999821727	FALSE
34	PF3D7_0105700.iso1.exon1.amp3_522	-0.111990542	0.032071163	0.152483612	0.144061705	0.750287524	0.999821727	FALSE
35	PF3D7_0105900.iso1.exon1.amp1_short_2005	-0.697687844	-0.569216647	0.46616379	0.128471197	0.356091945	0.999821727	FALSE
36	PF3D7_0106200.iso1.exon1.amp1_3577	-0.519930228	-0.452498103	0.191828552	0.067432125	0.690057602	0.999821727	FALSE
37	PF3D7_0106500.iso1.exon1.amp1_2562	-0.315886758	-0.271573262	0.065450087	0.044313496	0.890723914	0.999821727	FALSE
38	PF3D7_0107900.iso1.exon1.amp1_696	-0.973424714	-0.701404494	0.732626946	0.27202022	0.176721551	0.999821727	FALSE
39	PF3D7_0108000.e1s1_7463	-0.925613302	-0.807806187	0.90136476	0.117807115	0.1140796	0.999821727	FALSE
40	PF3D7_0108300.s1_7972	0.145884187	0.185417769	0.160855253	0.039533582	0.737269669	0.999821727	FALSE
41	PF3D7_0108300.s2_7111	0.560887867	0.458988014	0.070129437	-0.101899853	0.882988022	0.999821727	FALSE
42	PF3D7_0108300.s3_7689	0.281141475	0.408787349	0.378755962	0.127645873	0.444734845	0.999821727	FALSE
43	PF3D7_0108400.iso1.exon1.amp1_short_3733	-0.693413939	-0.67460336	0.097433324	0.01881058	0.838195305	0.999821727	FALSE
44	PF3D7_0108400.iso1.exon7.amp1_45	0.207208184	0.224602795	0.016152494	0.017394611	0.972918803	0.999821727	FALSE
45	PF3D7_0108600.iso1.exon4.amp1_4380	-0.275579156	-0.210397296	0.295309107	0.06518186	0.545129673	0.999821727	FALSE
46	PF3D7_0108600.iso1.exon5.amp1_634	-0.394328463	-0.476886627	0.771050341	-0.082558164	0.15977766	0.999821727	FALSE
47	PF3D7_0108700.e1s1_7776	0.382849402	0.425094285	0.260669929	0.042244883	0.591255911	0.999821727	FALSE
48	PF3D7_0108800.iso1.exon6.amp1_1233	0.153834416	0.260234756	0.609107884	0.106400341	0.244852848	0.999821727	FALSE
49	PF3D7_0109200.iso1.exon1.amp1_2413	-0.837130595	-0.60171466	0.536508933	0.235415935	0.296466003	0.999821727	FALSE
50	PF3D7_0109800.1o1_7336	-0.374563506	-0.238259079	0.097159381	0.136304427	0.838641407	0.999821727	FALSE
51	PF3D7_0109900.iso2.exon16.amp1_324	-0.659135344	-0.694589613	0.208281544	-0.035454269	0.665636232	0.999821727	FALSE
52	PF3D7_0110000.1o1_8428	-0.126824872	0.129599499	0.246639059	0.256424371	0.610648406	0.999821727	FALSE
53	PF3D7_0110500.e1s2_5766	0.341938667	0.411735322	0.281659594	0.069796655	0.563003012	0.999821727	FALSE
54	PF3D7_0110500.e1s3_5188	-1.157932305	-1.179245151	0.034576795	-0.021312846	0.942085054	0.999821727	FALSE
55	PF3D7_0110600.e1s1_6533	-0.695924105	-0.661345221	0.066743189	0.034578884	0.888584644	0.999821727	FALSE
56	PF3D7_0110600.e3_5665	-0.166341536	-0.214896085	0.107475782	-0.048554549	0.821893992	0.999821727	FALSE
57	PF3D7_0110700.e1s1_7186	-0.559996198	-0.540008479	0.038191931	0.019987719	0.936047316	0.999821727	FALSE
58	PF3D7_0110800.iso1.exon3.amp1_2717	-0.455547839	-0.452121269	0.006793242	0.00342657	0.988607935	0.999821727	FALSE
59	PF3D7_0111000.e1s2_6049	-0.072032422	0.140926467	0.152682249	0.212958889	0.749977454	0.999821727	FALSE
60	PF3D7_0111000.e5s1_5681	-0.59472203	-0.591270752	0.071717666	0.003451278	0.880365894	0.999821727	FALSE
61	PF3D7_0111300.iso1.exon1.amp1_1701	-0.317361767	-0.206556779	0.448398921	0.110804988	0.372764561	0.999821727	FALSE
62	PF3D7_0111500.e4s1_8619	0.703352905	0.668487712	0.096331994	-0.034865193	0.839989208	0.999821727	FALSE
63	PF3D7_0111500.e5s1_5099	-0.735020177	-0.835424309	1.141624209	-0.100404132	0.063121136	0.999821727	FALSE
64	PF3D7_0111700.iso1.exon1.amp1_961	-0.49547722	-0.501413307	0.020769525	-0.005936087	0.965184091	0.999821727	FALSE
65	PF3D7_0112000.3o4_5862	0.803668112	0.918067525	0.235283463	0.114399412	0.626632091	0.999821727	FALSE
66	PF3D7_0112100.1o1_6684	0.688327913	0.777846757	0.329239677	0.089518843	0.50244913	0.999821727	FALSE
67	PF3D7_0112200.iso1.exon1.amp2_183	0.261459563	0.311736631	0.05860342	0.050277068	0.902069096	0.999821727	FALSE
68	PF3D7_0113100.iso1.exon1.amp1_4475	0.353030294	0.510506913	0.113107167	0.157476619	0.8127996	0.999821727	FALSE
69	PF3D7_0113100.iso1.exon2.amp1_4270	-0.89257614	-0.652891921	0.357738018	0.239684219	0.46856516	0.999821727	FALSE
70	PF3D7_0113100.iso1.exon2.amp2_3349	-0.439529361	-0.246998685	0.179373971	0.192530676	0.708854682	0.999821727	FALSE
71	PF3D7_0113300.2o2_5313	-0.922254696	-0.688524485	0.382701339	0.233730211	0.440371367	0.999821727	FALSE
72	PF3D7_0113400.2o2_8752	0.389035777	0.693488643	0.153887588	0.304452866	0.748097158	0.999821727	FALSE
73	PF3D7_0113800.2o4_7664	0.478297924	0.535611669	0.166412435	0.057313745	0.728686384	0.999821727	FALSE
74	PF3D7_0113800.3o4_7092	-0.760490638	-0.649714638	0.520377553	0.110775999	0.309264325	0.999821727	FALSE
75	PF3D7_0113900.2o2_5532	0.488936246	0.549827175	0.036874209	0.060890928	0.938247503	0.999821727	FALSE
76	PF3D7_0114000.e2s2_8371	-0.454834787	-0.422643644	0.099004437	0.032191143	0.835638255	0.999821727	FALSE
77	PF3D7_0114100.iso1.exon1.amp1_2718	0.058302912	0.136830998	0.092636713	0.078528086	0.846016796	0.999821727	FALSE
78	PF3D7_0115000.e1s1_6895	-0.082782084	-0.014404166	0.189750105	0.068377918	0.693176305	0.999821727	FALSE
79	PF3D7_0115200.iso1.exon2.amp1_719	0.450733823	0.495418971	0.089131414	0.044685149	0.851746306	0.999821727	FALSE
80	PF3D7_0115300.iso1.exon2.amp1_1279	0.833944322	1.051898441	1.343726704	0.217954119	0.03975875	0.999821727	FALSE
81	PF3D7_0115400.iso1.exon2.amp1_2714	1.027248698	1.219282837	0.205467065	0.192034139	0.669779674	0.999821727	FALSE
82	PF3D7_0115700.iso1.exon1.amp1_1583	2.391387159	2.4504294	0.074268161	0.05904224	0.876158986	0.999821727	FALSE
83	PF3D7_0115700.iso1.exon2.amp2_4262	-0.358450204	-0.293786143	0.189389089	0.064664061	0.69371876	0.999821727	FALSE
84	PF3D7_0200100 (renamed)_4770	0.096583252	0.099485061	0.00367375	0.002901808	0.99383902	0.999821727	FALSE
85	PF3D7_0200100.iso1.exon2.amp1_2746	1.678661033	1.778486438	0.189501834	0.099825404	0.693549328	0.999821727	FALSE
86	PF3D7_0200200.iso1.exon1.amp1_1284	0.727314244	0.929164385	0.340597149	0.201850141	0.488728905	0.999821727	FALSE
87	PF3D7_0200400.iso1.exon1.amp1_1275	1.09438706	1.225021199	0.143174783	0.13063414	0.764881464	0.999821727	FALSE
88	PF3D7_0200500.iso1.exon1.amp1_3303	0.447731972	0.52646497	0.774925024	0.078732998	0.158166562	0.999821727	FALSE
89	PF3D7_0200600.iso1.exon1.amp1_2442	0.934328598	1.171954701	0.290518616	0.237626104	0.551357164	0.999821727	FALSE
90	PF3D7_0200700.iso1.exon1.amp1_700	0.024311242	-0.015142231	0.085281387	-0.039453473	0.858052045	0.999821727	FALSE
91	PF3D7_0200800.iso1.exon3.amp1_406	0.468271726	0.514930932	0.302868764	0.046659206	0.535403037	0.999821727	FALSE
92	PF3D7_0201000.iso1.exon1.amp1_3595	0.732292822	0.751753176	0.052364917	0.019460354	0.912431304	0.999821727	FALSE
93	PF3D7_0201200.iso1.exon2.amp1_3603	1.930962736	2.124732941	0.200017517	0.193770205	0.677842825	0.999821727	FALSE
94	PF3D7_0201300.iso1.exon2.amp1_119	1.637641627	1.792706266	0.133104013	0.155064639	0.78080375	0.999821727	FALSE
95	PF3D7_0201500.2o2_5533	-0.046983882	-0.21548974	0.167872734	-0.168505858	0.726438778	0.999821727	FALSE
96	PF3D7_0201700.2o2_8813	0.614999749	0.671120141	0.335768699	0.056120392	0.494526882	0.999821727	FALSE
97	PF3D7_0201800.iso1.exon1.amp1_4451	0.547328056	0.863492274	0.218770457	0.316164217	0.650322168	0.999821727	FALSE
98	PF3D7_0201800.iso1.exon2.amp1_3566	-0.397911411	-0.277014	0.356769623	0.120897411	0.469686886	0.999821727	FALSE
99	PF3D7_0201900.e2s1_5490	-0.558312189	-0.54805284	0.057482627	0.01025935	0.903929078	0.999821727	FALSE
100	PF3D7_0202000.e2s1_8364	-0.327732493	-0.434130952	0.178304975	-0.106398459	0.710480084	0.999821727	FALSE
101	PF3D7_0202300.2o2_8437	-0.52644103	-0.478858845	0.050976109	0.047582185	0.914741087	0.999821727	FALSE
102	PF3D7_0202400.e1s1_5756	-0.50261577	-0.53964926	0.342628316	-0.03703349	0.486305368	0.999821727	FALSE
103	PF3D7_0202500.1o1_7250	0.798087207	0.779174168	0.01283194	-0.018913039	0.978483873	0.999821727	FALSE
104	PF3D7_0202600.iso2.exon1.amp1_2518	-0.71275386	-0.698914959	0.09948603	0.013838901	0.834854933	0.999821727	FALSE
105	PF3D7_0202700.iso1.exon1.amp1_2186	-0.379051197	-0.270501507	0.423021893	0.108549691	0.397757409	0.999821727	FALSE
106	PF3D7_0203000.iso1.exon1.amp1_538	-0.484564746	-0.469649455	0.066924904	0.014915291	0.88828411	0.999821727	FALSE
107	PF3D7_0203000.iso1.exon1.amp2_1055	-0.012648843	0.345658915	0.198828083	0.358307758	0.679609723	0.999821727	FALSE
108	PF3D7_0203100.e1s1_6609	-0.365101761	-0.359773378	0.01827212	0.005328383	0.969367375	0.999821727	FALSE
109	PF3D7_0203100.e2s2_7084	0.789377986	0.862050784	0.084928306	0.072672798	0.858630988	0.999821727	FALSE
110	PF3D7_0203100.e2s3_5060	-0.252108069	-0.351223442	0.282315184	-0.099115373	0.562135464	0.999821727	FALSE
111	PF3D7_0203200.1o1_5016	-0.406470861	-0.504119638	0.233200284	-0.097648777	0.629591795	0.999821727	FALSE
112	PF3D7_0203800.iso1.exon12.amp1_2119	-0.300576923	-0.342714434	0.16367286	-0.042137511	0.732911866	0.999821727	FALSE
113	PF3D7_0204100.iso1.exon1.amp1_247	-0.683736176	-0.536097526	0.429581527	0.14763865	0.391163114	0.999821727	FALSE
114	PF3D7_0204100.iso1.exon1.amp2_536	-0.588517998	-0.512951798	0.120081955	0.0755662	0.801585157	0.999821727	FALSE
115	PF3D7_0204100.iso1.exon1.amp3_476	-0.093840794	0.018421272	0.228528605	0.112262065	0.636259718	0.999821727	FALSE
116	PF3D7_0204300.1o1_4751	-0.172837138	-0.079444207	0.07955789	0.093392931	0.867449796	0.999821727	FALSE
117	PF3D7_0204500.1o1_5582	-0.55244492	-0.484683143	0.616867441	0.067761777	0.239883232	0.999821727	FALSE
118	PF3D7_0204600.iso1.exon1.amp2_seg2_1153	-0.281956914	0.060999253	0.283005968	0.342956167	0.561222331	0.999821727	FALSE
119	PF3D7_0204800.iso1.exon1.amp1_3895	-0.444529852	-0.20486708	0.436706386	0.239662773	0.384106744	0.999821727	FALSE
120	PF3D7_0206000.s2_8261	0.278625767	0.368495898	0.222339701	0.089870132	0.645157621	0.999821727	FALSE
121	PF3D7_0206100.1o4_7281	-0.603079707	-0.749564876	0.11154445	-0.14648517	0.815319808	0.999821727	FALSE
122	PF3D7_0206200.1o1_7052	-0.06259621	0.035563617	0.916243204	0.098159827	0.109842105	0.999821727	FALSE
123	PF3D7_0206800_8292	1.923442433	2.054726311	0.272055633	0.131283878	0.575816052	0.999821727	FALSE
124	PF3D7_0206900.1.1o2_4674	0.332231968	0.534599278	0.156863765	0.20236731	0.743463493	0.999821727	FALSE
125	PF3D7_0206900.1.2o2_5836	-0.91450873	-0.883317314	0.263333241	0.031191415	0.587620217	0.999821727	FALSE
126	PF3D7_0206900.1.e1_8561	-0.471025863	-0.149912166	0.285671576	0.321113697	0.557708231	0.999821727	FALSE
127	PF3D7_0207000.1o2_6703	1.359404647	1.692979581	0.281867198	0.333574934	0.562728189	0.999821727	FALSE
128	PF3D7_0207000.2o2_6414	0.226255146	0.360487092	0.078701532	0.134231946	0.86885823	0.999821727	FALSE
129	PF3D7_0207000.e1_7116	1.193773049	1.442205435	0.2304117	0.248432386	0.633566895	0.999821727	FALSE
130	PF3D7_0207100.s1_9173	0.219789549	0.377633283	0.799038838	0.157843735	0.148519462	0.999821727	FALSE
131	PF3D7_0207200_6262	-0.836337971	-0.8731003	0.421134488	-0.036762329	0.399672206	0.999821727	FALSE
132	PF3D7_0207300.iso1.exon2.amp1_4172	-0.312708902	-0.261672517	0.08005626	0.051036385	0.86663041	0.999821727	FALSE
133	PF3D7_0207300.iso1.exon5.amp1_1780	-0.60383745	-0.558483659	0.617790909	0.045353791	0.239298468	0.999821727	FALSE
134	PF3D7_0207400.4o4_5635	-0.36184672	-0.313143705	0.242104094	0.048703015	0.617001052	0.999821727	FALSE
135	PF3D7_0207500.e1s1_8609	0.262945691	0.132078574	0.122483115	-0.130867118	0.797737601	0.999821727	FALSE
136	PF3D7_0207500.e3s1_8088	0.376314373	0.505214232	0.091719874	0.128899859	0.847514302	0.999821727	FALSE
137	PF3D7_0207600.e2s1_8341	0.503708663	0.402736994	0.055224544	-0.100971669	0.907678671	0.999821727	FALSE
138	PF3D7_0207600.e4s1_8076	-0.885219408	-0.897953498	0.028527297	-0.01273409	0.952198781	0.999821727	FALSE
139	PF3D7_0207700.2o4_5642	1.682258742	2.380267814	0.612987918	0.698009073	0.242355311	0.999821727	FALSE
140	PF3D7_0207700.4o4_8238	-0.347243601	-0.373494056	0.026387392	-0.026250454	0.955779067	0.999821727	FALSE
141	PF3D7_0208000.4o4_7083	-0.384170985	-0.335135823	0.205412274	0.049035162	0.669860479	0.999821727	FALSE
142	PF3D7_0208100.iso2.exon10.amp1_1520	-0.040381793	0.101692157	0.251786054	0.14207395	0.603488277	0.999821727	FALSE
143	PF3D7_0208100.iso2.exon13.amp1_3822	-0.182306243	-0.225161825	0.028228511	-0.042855582	0.952698602	0.999821727	FALSE
144	PF3D7_0208700.iso2.exon4.amp1_1767	-0.643973956	-0.586728011	0.347889149	0.057245946	0.480070945	0.999821727	FALSE
145	PF3D7_0208900.e1s3_5063	-1.058820764	-1.130194899	0.103322974	-0.071374135	0.828622415	0.999821727	FALSE
146	PF3D7_0209100.2o3_8219	-0.247303768	-0.188691733	0.082084404	0.058612035	0.86329798	0.999821727	FALSE
147	PF3D7_0209300.1o2_6694	-0.213535518	-0.133119509	0.069912778	0.080416009	0.883345861	0.999821727	FALSE
148	PF3D7_0209400.2o7_8465	-1.193418328	-1.144715563	0.15146203	0.048702765	0.751883104	0.999821727	FALSE
149	PF3D7_0209800.e2_6830	-0.017914148	0.177917949	0.34436179	0.195832098	0.484244287	0.999821727	FALSE
150	PF3D7_0210200.iso1.exon2.amp2_seg1_2597	2.597203853	2.66065325	0.045561923	0.063449397	0.923755111	0.999821727	FALSE
151	PF3D7_0210300.e2_9137	-0.244100697	-0.148326767	0.169284662	0.09577393	0.724268783	0.999821727	FALSE
152	PF3D7_0210600.3o5_4701	-0.014217063	-0.265486448	0.262237909	-0.251269385	0.589113689	0.999821727	FALSE
153	PF3D7_0210700.1o1_6705	-0.213900266	-0.08434587	0.305632115	0.129554396	0.531878489	0.999821727	FALSE
154	PF3D7_0211100.iso1.exon1.amp1_3153	-0.437025349	-0.263488056	0.950442271	0.173537294	0.100744471	0.999821727	FALSE
155	PF3D7_0211100.iso1.exon1.amp2_1349	0.118970383	0.327967314	0.528283821	0.208996932	0.30292849	0.999821727	FALSE
156	PF3D7_0211200.1o1_7850	-0.038144922	-0.008663775	0.039071005	0.029481147	0.934579917	0.999821727	FALSE
157	PF3D7_0211300.iso1.exon2.amp1_77	-0.482368074	-0.359051759	0.45434422	0.123316315	0.367110022	0.999821727	FALSE
158	PF3D7_0211900.iso1.exon1.amp1_2450	0.006777245	0.086792845	0.155161778	0.0800156	0.746111758	0.999821727	FALSE
159	PF3D7_0212200.iso1.exon2.amp1_4153	0.051804075	0.084664577	0.138028023	0.032860502	0.773001805	0.999821727	FALSE
160	PF3D7_0212300.e3s1_4883	-0.411606546	-0.365928088	0.049682672	0.045678458	0.916893169	0.999821727	FALSE
161	PF3D7_0212400.3o3_6803	-0.789451676	-0.803143923	0.167244228	-0.013692247	0.727405732	0.999821727	FALSE
162	PF3D7_0212500.iso1.exon1.amp1_3098	-0.507615328	-0.419023499	0.258118299	0.088591829	0.594752814	0.999821727	FALSE
163	PF3D7_0212700.1o1_4996	-0.321032809	-0.50392693	1.108748946	-0.182894121	0.068266863	0.999821727	FALSE
164	PF3D7_0212900.1o1_9032	-0.538941567	-0.541130188	0.001618839	-0.002188621	0.997285132	0.999821727	FALSE
165	PF3D7_0213000.1o1_4661	-0.961107754	-1.081503998	0.504103251	-0.120396244	0.322694445	0.999821727	FALSE
166	PF3D7_0213400.iso1.exon2.amp1_388	-0.609587419	-0.648666473	0.123392923	-0.039079054	0.796281555	0.999821727	FALSE
167	PF3D7_0213400.iso1.exon3.amp1_84	-0.587196723	-0.529229105	0.250661959	0.057967618	0.605047487	0.999821727	FALSE
168	PF3D7_0213500.iso1.exon3.amp1_4447	-0.724965868	-0.591581686	1.003242771	0.133384182	0.088296404	0.999821727	FALSE
169	PF3D7_0213900.iso1.exon1.amp2_1348	-0.738136589	-0.799597027	0.209856864	-0.061460438	0.663323331	0.999821727	FALSE
170	PF3D7_0214100.e1s1_6246	0.679249169	0.69483028	0.025052156	0.015581111	0.958013701	0.999821727	FALSE
171	PF3D7_0214300.iso1.exon1.amp1_2559	0.152435113	0.312686762	0.934185177	0.160251649	0.104960949	0.999821727	FALSE
172	PF3D7_0214300.iso1.exon1.amp2_2848	-0.675792618	-0.558611289	0.316789303	0.117181329	0.517817339	0.999821727	FALSE
173	PF3D7_0215700.e2s2_6920	0.343980858	0.595996216	0.387264462	0.252015358	0.435367911	0.999821727	FALSE
174	PF3D7_0216400.1o1_7065	-0.761059215	-0.633526547	0.299647697	0.127532668	0.539532305	0.999821727	FALSE
175	PF3D7_0216700.1.6o7_7390	-0.477307075	-0.529943211	0.12651162	-0.052636136	0.79129807	0.999821727	FALSE
176	PF3D7_0216700.iso2.exon6.amp1_679	0.163313847	0.036054079	0.156562443	-0.127259767	0.743932035	0.999821727	FALSE
177	PF3D7_0216900.1o1_7051	0.058182989	0.143708774	0.32854342	0.085525785	0.50329953	0.999821727	FALSE
178	PF3D7_0217400.2o2_6962	0.181306146	0.84441364	1.078442647	0.663107494	0.073437714	0.999821727	FALSE
179	PF3D7_0217700.iso1.exon1.amp1_3848	0.351376612	0.411824081	0.232431071	0.060447468	0.630686796	0.999821727	FALSE
180	PF3D7_0217900.e1s1_7766	0.433090304	0.478400367	0.081086446	0.045310063	0.864937294	0.999821727	FALSE
181	PF3D7_0218300.1o4_6226	-0.772173914	-0.806768394	0.205489341	-0.03459448	0.669746824	0.999821727	FALSE
182	PF3D7_0218300.2o4_6804	-0.941578865	-0.905177621	0.711083506	0.036401243	0.187033092	0.999821727	FALSE
183	PF3D7_0218300.e2_6243	-0.869401765	-0.940735571	1.504079997	-0.071333806	0.028220317	0.999821727	FALSE
184	PF3D7_0219300.1o1_5228	-0.113301972	-0.180654177	0.279909386	-0.067352205	0.565323537	0.999821727	FALSE
185	PF3D7_0219400.iso1.exon2.amp1_1777	-1.50869985	-1.153705617	0.23095218	0.354994232	0.632795271	0.999821727	FALSE
186	PF3D7_0219600.e1s1_8817	0.404728543	0.503321606	0.552229525	0.098593063	0.284473846	0.999821727	FALSE
187	PF3D7_0219700.2o2_6131	1.342077378	1.397181231	0.176830057	0.055103852	0.712725742	0.999821727	FALSE
188	PF3D7_0219900.2o2_6693	0.637961941	0.819644427	0.830534428	0.181682487	0.136854251	0.999821727	FALSE
189	PF3D7_0220000.e2s1_7105	2.214860834	2.503097214	0.887249749	0.28823638	0.118265861	0.999821727	FALSE
190	PF3D7_0220000.e2s2_7394	2.095353524	2.255179046	0.322853441	0.159825522	0.510289344	0.999821727	FALSE
191	PF3D7_0220100.e2s1_7661	-0.200997658	0.037036022	0.413796673	0.23803368	0.407190729	0.999821727	FALSE
192	PF3D7_0220600.2o2_6976	-0.090715251	-0.083388266	0.005349954	0.007326986	0.991028122	0.999821727	FALSE
193	PF3D7_0221400.iso1.exon2.amp1_3871	-0.730388385	-0.630319474	0.181551538	0.100068911	0.705549507	0.999821727	FALSE
194	PF3D7_0221600.1o1_5812	-0.110626809	-0.00553236	0.123577996	0.105094449	0.795985488	0.999821727	FALSE
195	PF3D7_0222000.iso1.exon1.amp1_691	-0.792151473	-0.663842213	0.240227455	0.12830926	0.619641818	0.999821727	FALSE
196	PF3D7_0222100.iso1.exon1.amp1_3007	0.775279959	0.879121974	0.095231298	0.103842015	0.841783254	0.999821727	FALSE
197	PF3D7_0222500.iso1.exon2.amp1_987	0.250088033	0.37982134	0.120620649	0.129733307	0.80072137	0.999821727	FALSE
198	PF3D7_0222600.iso1.exon2.amp1_1008	0.575570413	0.650208051	0.126846589	0.074637638	0.790763523	0.999821727	FALSE
199	PF3D7_0222700.iso1.exon2.amp1_1289	0.356315004	0.650956177	0.269346781	0.294641172	0.579465048	0.999821727	FALSE
200	PF3D7_0222800.iso1.exon2.amp1_1564	0.56039361	0.576831684	0.016510477	0.016438074	0.972318947	0.999821727	FALSE
201	PF3D7_0222900.1o1_4649	0.554172971	0.461903784	0.375375454	-0.092269187	0.448501192	0.999821727	FALSE
202	PF3D7_0223100.iso1.exon2.amp1_989	0.000540694	0.004306409	0.022922576	0.003765715	0.961578699	0.999821727	FALSE
203	PF3D7_0223200.iso1.exon2.amp1_3607	1.027263089	1.208546102	0.293714337	0.181283013	0.547197346	0.999821727	FALSE
204	PF3D7_0223300 (renamed)_6619	1.225895541	1.23141089	0.00758763	0.005515349	0.98727592	0.999821727	FALSE
205	PF3D7_0223300.iso1.exon2.amp1_3611	1.752242195	1.864498761	0.163321031	0.112256566	0.733455356	0.999821727	FALSE
206	PF3D7_0223400.iso1.exon2.amp1_1856	0.037941195	0.032383171	0.007953264	-0.005558024	0.986662849	0.999821727	FALSE
207	PF3D7_0223500.iso1.exon1.amp1_3027	0.605350609	0.568879544	0.048945707	-0.036471064	0.918119754	0.999821727	FALSE
208	PF3D7_0223500.iso1.exon2.amp1_4551	-0.480002468	-0.354376915	0.515155239	0.125625553	0.31351663	0.999821727	FALSE
209	PF3D7_0300100.iso1.exon2.amp1_138	2.347779315	2.441457506	0.531603172	0.093678191	0.300304745	0.999821727	FALSE
210	PF3D7_0300200.iso1.exon1.amp1_3012	1.242716563	1.414062131	0.207556971	0.171345568	0.666701571	0.999821727	FALSE
211	PF3D7_0300400.iso1.exon1.amp1_401	1.183603394	1.332076747	0.241283741	0.148473354	0.618154579	0.999821727	FALSE
212	PF3D7_0300500.iso1.exon1.amp1_134	-0.100819189	0.002152936	0.383473282	0.102972126	0.439521676	0.999821727	FALSE
213	PF3D7_0300700.iso1.exon2.amp1_3592	1.153057807	1.214846142	0.219885606	0.061788335	0.648706022	0.999821727	FALSE
214	PF3D7_0300800.iso1.exon2.amp1_1572	-0.066944778	0.064668788	0.093889144	0.131613566	0.843972429	0.999821727	FALSE
215	PF3D7_0300900.iso1.exon2.amp1_1555	-0.401796785	-0.219013484	0.349087471	0.182783301	0.478659473	0.999821727	FALSE
216	PF3D7_0301100.2o2_9008	-0.817686064	-0.767774481	0.382609824	0.049911583	0.440472188	0.999821727	FALSE
217	PF3D7_0301200.iso1.exon3.amp1_short_4317	-0.778754666	-0.701930999	0.523952952	0.076823668	0.306383977	0.999821727	FALSE
218	PF3D7_0301300.2o2_5567	-0.526897772	-0.558144128	0.180780908	-0.031246357	0.706718299	0.999821727	FALSE
219	PF3D7_0301400.2o2_4671	-0.202869382	-0.462122359	0.836856312	-0.259252977	0.134633574	0.999821727	FALSE
220	PF3D7_0301500.2o2_6419	-0.585875245	-0.550971803	0.073290397	0.034903441	0.87777118	0.999821727	FALSE
221	PF3D7_0301700.e1s1_8026	-0.634414761	-0.568990096	0.229569558	0.065424665	0.634770314	0.999821727	FALSE
222	PF3D7_0301700.e2s1_8045	0.456903872	0.518609131	0.054825557	0.061705259	0.908341502	0.999821727	FALSE
223	PF3D7_0301800.2o2_9014	-0.546700868	-0.495438782	0.177326365	0.051262086	0.711969686	0.999821727	FALSE
224	PF3D7_0301900.1o1_7888	0.93835702	1.201499596	0.472302023	0.263142575	0.35048631	0.999821727	FALSE
225	PF3D7_0302000.iso1.exon2.amp1_158	0.169725354	0.18987497	0.015715059	0.020149616	0.973651823	0.999821727	FALSE
226	PF3D7_0302200.1o9_6523	1.050528432	1.037682359	0.016477651	-0.012846073	0.972373952	0.999821727	FALSE
227	PF3D7_0302200.9o9_6812	-0.426307517	-0.486710286	0.548510785	-0.060402769	0.287268452	0.999821727	FALSE
228	PF3D7_0302200.e1_5952	1.778728869	1.799293231	0.017035578	0.020564362	0.9714391	0.999821727	FALSE
229	PF3D7_0302200.e2_6826	-0.63782047	-0.561192741	0.556737785	0.076627729	0.28112057	0.999821727	FALSE
230	PF3D7_0302200.e8_5663	-0.855361583	-0.827048481	0.283743036	0.028313102	0.560249135	0.999821727	FALSE
231	PF3D7_0302200.e9_5390	-0.452713835	-0.376049505	0.109539493	0.07666433	0.818557179	0.999821727	FALSE
232	PF3D7_0302500.e1s1_7185	1.223511581	1.454430667	0.536588486	0.230919086	0.296404134	0.999821727	FALSE
233	PF3D7_0302500.e6s1_5136	-0.859416149	-0.884469186	0.313375361	-0.025053037	0.522090937	0.999821727	FALSE
234	PF3D7_0302500.e9s1_6314	0.30682482	0.419584139	0.071626269	0.11275932	0.880516739	0.999821727	FALSE
235	PF3D7_0302800.e1s1_6041	0.125869374	0.260754741	0.292301409	0.134885367	0.549033826	0.999821727	FALSE
236	PF3D7_0302900.e1s1_5473	-0.405164187	-0.404944082	0.000452288	0.000220105	0.999241491	0.999821727	FALSE
237	PF3D7_0302900.e1s2_5184	-0.191694597	-0.176729435	0.029970997	0.014965162	0.949784084	0.999821727	FALSE
238	PF3D7_0303200.e2s1_6620	-0.326527806	-0.341717774	0.039125746	-0.015189968	0.93448855	0.999821727	FALSE
239	PF3D7_0303700.e1s1_6024	0.777325659	1.06745724	0.236037152	0.290131582	0.625563361	0.999821727	FALSE
240	PF3D7_0303800.1o1_7036	0.251692173	0.385516664	0.571121414	0.133824491	0.270672509	0.999821727	FALSE
241	PF3D7_0304000.e4s1_5769	0.196547932	0.198150027	0.000865909	0.001602095	0.998547828	0.999821727	FALSE
242	PF3D7_0304100.1o1_7041	-0.435152394	-0.32292041	0.131310904	0.112231984	0.783652709	0.999821727	FALSE
243	PF3D7_0304200.e1s1_8348	-0.124362863	0.005359316	0.10650991	0.129722179	0.823457283	0.999821727	FALSE
244	PF3D7_0304600_7131	-0.552747649	0.374124438	1.542749214	0.926872087	0.026061793	0.999821727	FALSE
245	PF3D7_0305100.e1s3_8820	-0.715451012	-0.637468296	0.478454235	0.077982716	0.344947041	0.999821727	FALSE
246	PF3D7_0305200.iso1.exon1.amp1_3725	-0.490681065	-0.58747099	0.149793898	-0.096789925	0.754491733	0.999821727	FALSE
247	PF3D7_0305200.iso1.exon1.amp2_4239	-0.16538683	-0.272767864	0.190476581	-0.107381034	0.692085389	0.999821727	FALSE
248	PF3D7_0305500.e1s3_9107	-0.555776721	-0.579920902	0.020413437	-0.024144181	0.965780478	0.999821727	FALSE
249	PF3D7_0305600.1o1_7038	-0.308232055	-0.277092292	0.026228666	0.031139763	0.956044683	0.999821727	FALSE
250	PF3D7_0306200.5o5_6140	0.552821274	0.548502054	0.00499519	-0.00431922	0.991623029	0.999821727	FALSE
251	PF3D7_0307300.1o1_7034	-0.075737876	-0.036951648	0.173982994	0.038786228	0.717070535	0.999821727	FALSE
252	PF3D7_0307500.iso1.exon4.amp1_417	1.200410469	1.326694747	0.141959169	0.126284278	0.766796168	0.999821727	FALSE
253	PF3D7_0307700.e3s2_7088	0.009613461	0.175922204	0.40272211	0.166308743	0.418762456	0.999821727	FALSE
254	PF3D7_0308000.1o1_8767	0.107062263	0.235626971	0.103140227	0.128564708	0.828918918	0.999821727	FALSE
255	PF3D7_0308100.iso1.exon1.amp2_3062	-0.467473198	-0.355146311	0.144264344	0.112326886	0.763167031	0.999821727	FALSE
256	PF3D7_0308300.e1s1_6328	-0.435738062	-0.548199527	0.321063338	-0.112461465	0.512503152	0.999821727	FALSE
257	PF3D7_0308700.iso1.exon1.amp1_2745	0.336687688	0.287430879	0.126136813	-0.049256809	0.791896357	0.999821727	FALSE
258	PF3D7_0308900.iso1.exon1.amp2_1908	-0.664763543	-0.726807059	0.793099709	-0.062043516	0.150835966	0.999821727	FALSE
259	PF3D7_0309000.iso1.exon1.amp1_144	0.387537464	0.464906308	0.396123993	0.077368843	0.425785665	0.999821727	FALSE
260	PF3D7_0309100.iso1.exon5.amp1_2930	-0.278738052	-0.353750053	0.135025196	-0.075012001	0.777755912	0.999821727	FALSE
261	PF3D7_0309200.iso1.exon3.amp2_2542	-0.643195562	-0.593957849	0.306440892	0.049237713	0.530850068	0.999821727	FALSE
262	PF3D7_0309600.e1s1_5717	-0.328817353	-0.35070055	0.171414403	-0.021883197	0.721001503	0.999821727	FALSE
263	PF3D7_0309900.iso1.exon2.amp1_655	-0.576487256	-0.648414996	0.10647564	-0.07192774	0.823512768	0.999821727	FALSE
264	PF3D7_0310200.e1s3_7089	-0.33598167	-0.161168537	0.258217382	0.174813132	0.594616776	0.999821727	FALSE
265	PF3D7_0310300.e1s1_6333	-0.368771153	-0.379417586	0.038501755	-0.010646432	0.935530105	0.999821727	FALSE
266	PF3D7_0310300.e1s2_6327	0.633346374	0.578743016	0.089361729	-0.054603358	0.851369505	0.999821727	FALSE
267	PF3D7_0310500.e1s1_7495	-0.447773527	-0.324229154	0.399605146	0.123544373	0.422068216	0.999821727	FALSE
268	PF3D7_0310500.e1s2_7206	0.318751807	0.345205337	0.021781256	0.02645353	0.963489764	0.999821727	FALSE
269	PF3D7_0310500.e1s3_8946	0.42648911	0.420342759	0.01421494	-0.006146352	0.976165837	0.999821727	FALSE
270	PF3D7_0310700.2o2_7252	-0.340329796	-0.502213729	0.481369018	-0.161883933	0.342350156	0.999821727	FALSE
271	PF3D7_0310800.1o1_6383	-0.979359355	-0.995911215	0.145073404	-0.01655186	0.761895027	0.999821727	FALSE
272	PF3D7_0310800_9158	-0.036851307	-0.034847384	0.001422949	0.002003924	0.997613646	0.999821727	FALSE
273	PF3D7_0311100.iso1.exon3.amp1_1794	-0.385275309	-0.461713758	0.094363298	-0.076438449	0.843198845	0.999821727	FALSE
274	PF3D7_0311400.iso1.exon1.amp1_2120	-0.256034502	-0.405733207	0.16091624	-0.149698705	0.737175217	0.999821727	FALSE
275	PF3D7_0311400.iso1.exon2.amp1_782	0.621902719	0.679512073	0.054650461	0.057609353	0.908632417	0.999821727	FALSE
276	PF3D7_0311400.iso1.exon2.amp2_1071	-0.320785644	-0.399318221	0.598067252	-0.078532577	0.252098833	0.999821727	FALSE
277	PF3D7_0311600.2o5_9087	-0.747659198	-0.67798323	0.165430157	0.069675968	0.730200108	0.999821727	FALSE
278	PF3D7_0311700.1o15_9041	-0.20849738	-0.04805578	0.925179092	0.1604416	0.107380497	0.999821727	FALSE
279	PF3D7_0311800.e3_7124	-0.362202651	-0.386977469	0.097668784	-0.024774818	0.837811929	0.999821727	FALSE
280	PF3D7_0311900.1o1_5052	-0.862212302	-0.785478902	0.172563389	0.076733399	0.719241797	0.999821727	FALSE
281	PF3D7_0312200.iso1.exon1.amp1_3720	-0.931628811	-0.915358424	0.129946962	0.016270388	0.785822545	0.999821727	FALSE
282	PF3D7_0312300.1o1_7872	-0.292931201	-0.199117989	0.302113762	0.093813212	0.536368899	0.999821727	FALSE
283	PF3D7_0312400.2o7_8753	0.317382336	0.752010134	1.163727384	0.434627798	0.059910956	0.999821727	FALSE
284	PF3D7_0313000.1o2_7579	-0.084368755	-0.213534564	0.14775405	-0.129165809	0.75768704	0.999821727	FALSE
285	PF3D7_0313100.1o4_8505	-0.601863238	-0.751301997	0.261301696	-0.149438759	0.590392163	0.999821727	FALSE
286	PF3D7_0313200.1o1_9000	-0.286182293	-0.290791433	0.014799947	-0.00460914	0.975185395	0.999821727	FALSE
287	PF3D7_0313300.iso1.exon5.amp1_931	-0.792445287	-0.797094939	0.01094674	-0.004649652	0.981644051	0.999821727	FALSE
288	PF3D7_0313400.iso1.exon1.amp1_445	-0.241215781	-0.110336407	0.200852177	0.130879374	0.676604435	0.999821727	FALSE
289	PF3D7_0313600.5o6_7614	-0.379433412	-0.398993387	0.114041649	-0.019559975	0.811293859	0.999821727	FALSE
290	PF3D7_0313700.iso1.exon2.amp1_2360	-0.358099397	-0.085824475	0.244572073	0.272274922	0.613538791	0.999821727	FALSE
291	PF3D7_0313800.5o5_7343	-0.362872734	-0.295092694	0.132861238	0.06778004	0.781189238	0.999821727	FALSE
292	PF3D7_0315100.e1s1_7183	-0.549140367	-0.431497406	0.490975349	0.117642961	0.333915771	0.999821727	FALSE
293	PF3D7_0315200.iso1.exon1.amp3_2789	-0.334691579	-0.264020056	0.209308355	0.070671523	0.664128145	0.999821727	FALSE
294	PF3D7_0315400.1o1_8147	1.204872478	1.125061262	0.132714337	-0.079811216	0.781422531	0.999821727	FALSE
295	PF3D7_0315900.2o2_5837	-0.583410456	-0.542656358	0.062621001	0.040754098	0.89540817	0.999821727	FALSE
296	PF3D7_0316300.1.e3_6827	-0.375739737	-0.1789754	0.33309174	0.196764337	0.497763652	0.999821727	FALSE
297	PF3D7_0316500.e1s1_5735	0.243648642	0.423320466	0.209697158	0.179671824	0.663557608	0.999821727	FALSE
298	PF3D7_0317200.iso1.exon1.amp1_4590	-0.598665896	-0.530192249	0.206345322	0.068473647	0.66848518	0.999821727	FALSE
299	PF3D7_0317200.iso1.exon1.amp2_3936	-0.600311848	-0.500496041	0.28286609	0.099815807	0.561407151	0.999821727	FALSE
300	PF3D7_0317300.s2_8011	-0.3220125	-0.286300814	0.048444703	0.035711686	0.91895377	0.999821727	FALSE
301	PF3D7_0317300.s3_7150	1.233833741	1.249488446	0.045289386	0.015654706	0.924209235	0.999821727	FALSE
302	PF3D7_0317400.iso1.exon1.amp1_643	0.051311483	-0.02988562	0.165574763	-0.081197103	0.72997717	0.999821727	FALSE
303	PF3D7_0317400.iso1.exon2.amp1_3902	-0.269677749	-0.221762718	0.117388099	0.047915031	0.805909829	0.999821727	FALSE
304	PF3D7_0317500.iso1.exon1.amp1_3396	0.094975606	0.221459635	0.33176055	0.126484029	0.499379138	0.999821727	FALSE
305	PF3D7_0317500.iso1.exon2.amp1_942	-0.469333449	-0.529215143	0.223838024	-0.059881695	0.642996771	0.999821727	FALSE
306	PF3D7_0317700.e1s1_8247	-0.703821515	-0.744893521	0.098969011	-0.041072006	0.835695886	0.999821727	FALSE
307	PF3D7_0317700.e9s1_9185	-0.539838048	-0.582832671	0.145378486	-0.042994623	0.761415615	0.999821727	FALSE
308	PF3D7_0317800.1o1_7265	-0.456713783	-0.339727399	0.285782151	0.116986384	0.557562785	0.999821727	FALSE
309	PF3D7_0318200.e1s1_8532	-0.375516547	-0.20278065	0.277414839	0.172735897	0.568642146	0.999821727	FALSE
310	PF3D7_0318200.e1s2_8534	-0.471343044	-0.508249291	0.322641219	-0.036906247	0.510551429	0.999821727	FALSE
311	PF3D7_0318200.e1s3_5066	1.421431265	1.451309967	0.033487604	0.029878702	0.943905088	0.999821727	FALSE
312	PF3D7_0318500.iso1.exon1.amp3_2251	0.325600398	0.21163629	0.149938163	-0.113964107	0.754265975	0.999821727	FALSE
313	PF3D7_0318500.iso1.exon1.amp4_222	-0.531431565	-0.578296382	0.116114367	-0.046864817	0.807957596	0.999821727	FALSE
314	PF3D7_0318500.iso1.exon1.amp5_162	-0.179013042	0.083396334	0.298328101	0.262409376	0.54123046	0.999821727	FALSE
315	PF3D7_0318600.iso1.exon1.amp1_836	0.101040465	0.199459963	0.099606096	0.098419498	0.834659679	0.999821727	FALSE
316	PF3D7_0318600.iso1.exon1.amp2_200	-0.621343881	-0.502295994	0.279346718	0.119047887	0.566070931	0.999821727	FALSE
317	PF3D7_0319000.iso1.exon1.amp1_3432	-0.156552066	-0.107480636	0.077163189	0.04907143	0.871389787	0.999821727	FALSE
318	PF3D7_0319100.1o1_7545	-0.545371198	-0.554013656	0.029945924	-0.008642458	0.949826016	0.999821727	FALSE
319	PF3D7_0319700.e1s1_5124	-0.202539796	-0.206153936	0.016012327	-0.003614139	0.973153681	0.999821727	FALSE
320	PF3D7_0319900.1o1_4676	-0.050700343	0.06070503	0.080464799	0.111405373	0.865958871	0.999821727	FALSE
321	PF3D7_0320200.iso1.exon1.amp1_3627	0.239350374	0.376477734	0.204332821	0.13712736	0.671453529	0.999821727	FALSE
322	PF3D7_0320400.e1s3_6638	-0.401441271	-0.426282115	0.109105738	-0.024840844	0.819258134	0.999821727	FALSE
323	PF3D7_0320500.1o1_8174	-0.039381011	-0.029756724	0.015373231	0.009624287	0.974224653	0.999821727	FALSE
324	PF3D7_0320800.e1s1_8898	0.234652632	0.091566873	0.175147124	-0.143085759	0.715292422	0.999821727	FALSE
325	PF3D7_0320800.e2s1_4867	-0.690789956	-0.555773313	0.429353774	0.135016643	0.391390498	0.999821727	FALSE
326	PF3D7_0321500.iso1.exon1.amp1_841	-0.830194768	-0.732851472	0.322867466	0.097343297	0.510272027	0.999821727	FALSE
327	PF3D7_0321600.e1_7117	-0.493104918	-0.440814145	0.200412359	0.052290774	0.677256843	0.999821727	FALSE
328	PF3D7_0321800.iso1.exon1.amp1_234	-0.487492402	-0.484494993	0.006269034	0.002997409	0.989486941	0.999821727	FALSE
329	PF3D7_0322100.1o1_9067	-0.105080771	-0.024684715	0.163395064	0.080396056	0.733340978	0.999821727	FALSE
330	PF3D7_0322900.e2_5953	0.052611362	0.00443326	0.035727722	-0.048178102	0.940162324	0.999821727	FALSE
331	PF3D7_0323300.1o1_6145	-0.638039935	-0.659887102	0.085941334	-0.021847167	0.856970229	0.999821727	FALSE
332	PF3D7_0323600.e1_5672	-0.605997164	-0.593721141	0.070519991	0.012276023	0.882343056	0.999821727	FALSE
333	PF3D7_0323800.e2s1_7381	-0.37796296	-0.357336289	0.073315676	0.020626671	0.877729491	0.999821727	FALSE
334	PF3D7_0324100.2o2_5248	0.197166556	0.221403517	0.028382098	0.024236961	0.952441672	0.999821727	FALSE
335	PF3D7_0324400.iso1.exon2.amp1_1578	0.039404736	0.030871934	0.062233121	-0.008532803	0.89605081	0.999821727	FALSE
336	PF3D7_0324600.iso1.exon2.amp1_3003	1.1869828	1.30978735	0.203901352	0.12280455	0.672090875	0.999821727	FALSE
337	PF3D7_0324800.iso1.exon2.amp1_2158	0.509413644	0.542974334	0.248083832	0.033560689	0.608633168	0.999821727	FALSE
338	PF3D7_0324900.iso1.exon1.amp1_2456	1.448868395	1.618323647	0.60021224	0.169455252	0.250674809	0.999821727	FALSE
339	PF3D7_0324900.iso1.exon2.amp1_2239	0.329219048	0.382524195	0.073452382	0.053305147	0.87750404	0.999821727	FALSE
340	PF3D7_0400100.iso1.exon1.amp1_3682	0.157522588	0.352256928	0.197093256	0.19473434	0.68219126	0.999821727	FALSE
341	PF3D7_0400100.iso1.exon1.amp2_3971	0.090643799	0.18393727	0.100527795	0.093293471	0.833161273	0.999821727	FALSE
342	PF3D7_0400100.iso1.exon1.amp3_4260	-0.667658584	-0.661418056	0.081006936	0.006240528	0.865067938	0.999821727	FALSE
343	PF3D7_0400100.iso1.exon2.amp1_4192	1.002668043	1.050834731	0.072240597	0.048166689	0.879502951	0.999821727	FALSE
344	PF3D7_0400200.iso1.exon1.amp1_1876	1.918136045	2.049266643	0.315695878	0.131130599	0.519183314	0.999821727	FALSE
345	PF3D7_0400300.iso1.exon1.amp1_2731	0.066350291	0.066555751	0.000500202	0.00020546	0.999161136	0.999821727	FALSE
346	PF3D7_0400400.iso1.exon1.amp1_1294	0.75915224	0.842589444	0.144022755	0.083437204	0.763547032	0.999821727	FALSE
347	PF3D7_0400500.iso1.exon2.amp1_998	0.613994772	0.671816292	0.106107057	0.05782152	0.824109605	0.999821727	FALSE
348	PF3D7_0400700.iso1.exon1.amp1_992	0.141621903	0.210263038	0.085361608	0.068641135	0.857920522	0.999821727	FALSE
349	PF3D7_0400800.iso1.exon1.amp1_3008	1.718783615	1.757877756	0.063291875	0.039094141	0.894296896	0.999821727	FALSE
350	PF3D7_0400900.iso1.exon1.amp1_1573	0.409441136	0.356305937	0.083955756	-0.053135199	0.860226219	0.999821727	FALSE
351	PF3D7_0401000.iso1.exon1.amp1_2432	2.429900266	2.608704428	0.466222185	0.178804163	0.356038243	0.999821727	FALSE
352	PF3D7_0401200.iso1.exon2.amp1_2164	0.811637557	0.882377335	0.409780602	0.070739777	0.411355827	0.999821727	FALSE
353	PF3D7_0401300.iso1.exon2.amp1_3599	0.253308339	0.33339103	0.243214371	0.080082691	0.615441977	0.999821727	FALSE
354	PF3D7_0401400.iso1.exon2.amp1_1862	0.536291013	0.488737866	0.053830155	-0.047553147	0.909995544	0.999821727	FALSE
355	PF3D7_0401600.iso2.exon3.amp1_3896	-0.568618535	-0.600054962	0.161109336	-0.031436427	0.736876203	0.999821727	FALSE
356	PF3D7_0401900.1o1_7666	0.700812663	0.791304239	0.201950318	0.090491576	0.674976998	0.999821727	FALSE
357	PF3D7_0402000 (renamed)_9038	0.114191694	0.219094394	0.091717928	0.1049027	0.847517481	0.999821727	FALSE
358	PF3D7_0402000.e1s1_9149	-0.748629045	-0.688199698	0.536934453	0.060429348	0.296135216	0.999821727	FALSE
359	PF3D7_0402100.e2s1_6909	-0.162617435	-0.15616716	0.008602098	0.006450275	0.985574955	0.999821727	FALSE
360	PF3D7_0402200 (renamed)_8951	0.719738234	0.829624079	0.090701542	0.109885845	0.849178493	0.999821727	FALSE
361	PF3D7_0402400.2o2_4672	1.86195101	1.619235149	0.44588426	-0.242715862	0.375179026	0.999821727	FALSE
362	PF3D7_0402600.iso1.exon1.amp1_4449	0.403550184	0.575273524	0.167155082	0.17172334	0.727542932	0.999821727	FALSE
363	PF3D7_0403500.1o1_6443	-0.441540961	-0.296076862	0.485485652	0.145464099	0.338712464	0.999821727	FALSE
364	PF3D7_0403900.iso1.exon1.amp1_1235	-0.659526668	-0.586429011	0.52409015	0.073097657	0.30627395	0.999821727	FALSE
365	PF3D7_0404100.iso1.exon1.amp1_2815	-0.622007784	-0.600779187	0.054307066	0.021228597	0.909203001	0.999821727	FALSE
366	PF3D7_0404100.iso1.exon2.amp1_674	-0.351413572	-0.380853804	0.104650387	-0.029440232	0.826469757	0.999821727	FALSE
367	PF3D7_0404200.iso1.exon2.amp1_2698	-0.842770266	-0.789089664	0.226427251	0.053680602	0.639272688	0.999821727	FALSE
368	PF3D7_0404600.s3_7434	1.759137572	1.777612484	0.101800654	0.018474912	0.831093393	0.999821727	FALSE
369	PF3D7_0404600.s5_7440	-0.04838669	0.116530982	0.197582355	0.164917672	0.681462914	0.999821727	FALSE
370	PF3D7_0404700.1o2_6213	-0.181107351	-0.160214714	0.025312764	0.020892637	0.957577514	0.999821727	FALSE
371	PF3D7_0404800.1o2_6179	-0.732691119	-0.73833362	0.021418606	-0.0056425	0.96409706	0.999821727	FALSE
372	PF3D7_0404800.e1_7407	-0.833949691	-0.642814845	0.35343315	0.191134846	0.473567653	0.999821727	FALSE
373	PF3D7_0405300.iso1.exon1.amp1_1116	1.327008868	1.313976565	0.026203404	-0.013032304	0.956086958	0.999821727	FALSE
374	PF3D7_0405300.iso1.exon1.amp2_3940	-0.003212528	0.036607912	0.077594461	0.03982044	0.87067988	0.999821727	FALSE
375	PF3D7_0405400.e2s1_6356	-0.117471222	-0.18172253	0.247809447	-0.064251307	0.609015572	0.999821727	FALSE
376	PF3D7_0405400.e2s4_7512	-0.152202596	0.386624536	0.473409518	0.538827132	0.349483323	0.999821727	FALSE
377	PF3D7_0405600.2o9_6125	-0.325447632	-0.42403397	0.268082522	-0.098586338	0.581173322	0.999821727	FALSE
378	PF3D7_0405700.iso1.exon1.amp1_1975	-0.280039253	-0.257251852	0.11296637	0.022787402	0.813026554	0.999821727	FALSE
379	PF3D7_0405700.iso1.exon1.amp3_181	-0.537926076	-0.415621017	0.503389492	0.122305059	0.323295574	0.999821727	FALSE
380	PF3D7_0405900.e3s1_6875	-0.334321348	-0.371966763	0.134131068	-0.037645415	0.779173793	0.999821727	FALSE
381	PF3D7_0406200_8002	0.940981643	1.192594773	0.343207367	0.251613131	0.485616139	0.999821727	FALSE
382	PF3D7_0406500.iso1.exon2.amp4_169	0.025391855	-0.024414477	0.028346925	-0.049806332	0.952500512	0.999821727	FALSE
383	PF3D7_0406700.iso1.exon9.amp1_3850	-0.532523837	-0.555635896	0.194142993	-0.02311206	0.686593525	0.999821727	FALSE
384	PF3D7_0406800.iso1.exon3.amp1_3542	-0.386824859	-0.223633225	0.67669494	0.163191635	0.204797056	0.999821727	FALSE
385	PF3D7_0406900.4o8_8241	-0.635172003	-0.739202508	1.168906891	-0.104030505	0.059186052	0.999821727	FALSE
386	PF3D7_0407000.1o1_5004	-0.626207185	-0.553230311	0.330575276	0.072976874	0.500820847	0.999821727	FALSE
387	PF3D7_0407200.iso1.exon5.amp1_341	-0.197791469	-0.03248423	0.088588865	0.165307239	0.852634119	0.999821727	FALSE
388	PF3D7_0407700.e2s1_5470	-1.056082197	-1.009034026	0.602375533	0.047048171	0.249246612	0.999821727	FALSE
389	PF3D7_0407700.e2s2_6343	0.799421274	0.866667312	0.077706875	0.067246039	0.870494862	0.999821727	FALSE
390	PF3D7_0408000.iso1.exon1.amp1_683	-0.321468949	-0.340281052	0.348804733	-0.018812103	0.478992215	0.999821727	FALSE
391	PF3D7_0408600_7148	-0.891210215	-0.530951235	0.382466778	0.360258979	0.440629816	0.999821727	FALSE
392	PF3D7_0408700.e3s1_8902	-0.155109923	-0.034535586	0.131776182	0.120574337	0.782913062	0.999821727	FALSE
393	PF3D7_0408700.e5s1_7160	-0.685241514	-0.398511266	0.267441039	0.286730248	0.58204137	0.999821727	FALSE
394	PF3D7_0408700.e6s1_5713	-0.544489506	-0.517562726	0.116761321	0.026926781	0.80691726	0.999821727	FALSE
395	PF3D7_0408900.1.e3s1_7464	-0.761456293	-0.63899016	0.35341013	0.122466133	0.473594514	0.999821727	FALSE
396	PF3D7_0409200.iso1.exon1.amp1_3910	-0.989845292	-0.971531672	0.080562273	0.01831362	0.865798666	0.999821727	FALSE
397	PF3D7_0409500.2o2_7867	-0.562833801	-0.407557884	1.00679348	0.155275917	0.087523092	0.999821727	FALSE
398	PF3D7_0409600.iso1.exon1.amp1_551	-0.056087876	-0.083348821	0.069602826	-0.027260945	0.883857845	0.999821727	FALSE
399	PF3D7_0409600.iso1.exon1.amp2_1059	-0.256690657	-0.159382119	0.27824079	0.097308538	0.567541891	0.999821727	FALSE
400	PF3D7_0409900.7o7_7316	-0.666976313	-0.674857979	0.0703632	-0.007881665	0.882601969	0.999821727	FALSE
401	PF3D7_0410300.1o2_7946	0.859425525	1.073453948	0.198055009	0.214028423	0.680759456	0.999821727	FALSE
402	PF3D7_0410500.iso1.exon1.amp1_4441	-0.609563242	-0.468822676	1.614476846	0.140740565	0.022555004	0.999821727	FALSE
403	PF3D7_0410800.iso1.exon1.amp2_1340	0.254761399	0.329793566	0.090500185	0.075032167	0.849507669	0.999821727	FALSE
404	PF3D7_0410900.1o1_6799	0.581016813	0.608280429	0.05866878	0.027263617	0.901960652	0.999821727	FALSE
405	PF3D7_0411000.iso1.exon1.amp1_3723	-0.225228043	-0.163144883	0.100246146	0.062083159	0.833619059	0.999821727	FALSE
406	PF3D7_0411700.1o1_4939	0.512330282	0.449747151	0.047396899	-0.062583131	0.920698443	0.999821727	FALSE
407	PF3D7_0411900.iso1.exon1.amp1_724	-0.675707771	-0.633619418	0.161826559	0.042088353	0.735766055	0.999821727	FALSE
408	PF3D7_0411900.iso1.exon2.amp2_seg2_2021	-1.177759136	-1.19799837	0.116817492	-0.020239234	0.806826957	0.999821727	FALSE
409	PF3D7_0412000.1o1_7937	-0.279049437	-0.22461205	0.110150298	0.054437387	0.817570455	0.999821727	FALSE
410	PF3D7_0412400.iso1.exon1.amp1_3330	0.747085205	0.586781129	0.245477486	-0.160304076	0.612271651	0.999821727	FALSE
411	PF3D7_0412400.iso1.exon2.amp2_3106	-0.53709607	-0.462008695	0.329811273	0.075087375	0.501751791	0.999821727	FALSE
412	PF3D7_0412700.iso1.exon1.amp1_2752	1.144109933	1.239197665	0.373914925	0.095087732	0.450136303	0.999821727	FALSE
413	PF3D7_0412700.iso1.exon2.amp2_1081	0.133359615	0.319034238	0.176903419	0.185674623	0.71261396	0.999821727	FALSE
414	PF3D7_0412900.iso1.exon1.amp1_435	2.697406982	2.831059531	0.309186149	0.133652549	0.527369895	0.999821727	FALSE
415	PF3D7_0412900.iso1.exon2.amp2_3385	-0.228291688	-0.039240498	0.405900251	0.18905119	0.415413944	0.999821727	FALSE
416	PF3D7_0413200.iso1.exon1.amp1_2147	0.406809531	0.456123117	0.273824725	0.049313586	0.573441254	0.999821727	FALSE
417	PF3D7_0413300.iso1.exon2.amp1_707	-0.010087891	0.016830858	0.124044564	0.026918749	0.79523929	0.999821727	FALSE
418	PF3D7_0414000.e2s1_8062	-0.448704944	-0.351830953	0.547130351	0.096873992	0.288312449	0.999821727	FALSE
419	PF3D7_0414700.1o1_7337	0.09325812	0.095052125	0.003616842	0.001794006	0.993934455	0.999821727	FALSE
420	PF3D7_0414900.e4s1_5677	-0.231255419	-0.229062148	0.003446821	0.002193271	0.994219576	0.999821727	FALSE
421	PF3D7_0415000.1o1_7877	-0.522756059	-0.405057197	0.654700374	0.117698863	0.217052455	0.999821727	FALSE
422	PF3D7_0415100.iso1.exon1.amp1_2166	-0.553265394	-0.495431759	0.270085049	0.057833635	0.578469035	0.999821727	FALSE
423	PF3D7_0415300.iso1.exon1.amp1_4554	0.273814209	0.336915469	0.088398337	0.063101259	0.852945955	0.999821727	FALSE
424	PF3D7_0415300.iso1.exon1.amp2_3693	0.36287118	0.458049524	0.11436292	0.095178344	0.810776419	0.999821727	FALSE
425	PF3D7_0415400.1o1_6387	-0.704505617	-0.684249356	0.112210465	0.020256261	0.814245387	0.999821727	FALSE
426	PF3D7_0416300.iso1.exon1.amp2_462	-0.181553248	0.008244915	0.239068279	0.189798163	0.62127646	0.999821727	FALSE
427	PF3D7_0416400.iso1.exon2.amp1_1080	-0.041391123	0.084240759	0.359739152	0.125631883	0.466253805	0.999821727	FALSE
428	PF3D7_0416400.iso1.exon2.amp2_3664	-0.532037223	-0.317784937	0.696031447	0.214252285	0.194605344	0.999821727	FALSE
429	PF3D7_0416600.1o1_5263	0.360301046	0.408539771	0.039554311	0.048238726	0.933773289	0.999821727	FALSE
430	PF3D7_0416900.iso1.exon2.amp2_seg1_2886	-0.388452016	-0.259866605	0.337457041	0.128585411	0.492493644	0.999821727	FALSE
431	PF3D7_0417100.1o4_5878	0.052813611	-0.013870141	0.055966381	-0.066683751	0.906446508	0.999821727	FALSE
432	PF3D7_0417400.iso1.exon1.amp4_seg2_2328	0.223133395	0.306030846	0.147887055	0.082897451	0.757478517	0.999821727	FALSE
433	PF3D7_0417400.iso1.exon1.amp6_seg1_1730	-0.321821005	-0.102060033	0.61666693	0.219760972	0.240010387	0.999821727	FALSE
434	PF3D7_0418000.6o10_5641	-0.144085339	-0.052007665	0.206778544	0.092077674	0.667847151	0.999821727	FALSE
435	PF3D7_0418000.7o10_5069	-0.8801899	-0.831299677	0.255527355	0.048890223	0.598317218	0.999821727	FALSE
436	PF3D7_0418800.iso1.exon4.amp1_2929	-0.66360322	-0.734222825	0.940766331	-0.070619605	0.103230963	0.999821727	FALSE
437	PF3D7_0419100.iso1.exon1.amp1_2401	-0.903012851	-0.825757254	0.429624466	0.077255597	0.391120257	0.999821727	FALSE
438	PF3D7_0419200.1o1_6384	-1.180270063	-1.168964104	0.071230644	0.011305959	0.88116976	0.999821727	FALSE
439	PF3D7_0419300.iso1.exon1.amp1_2162	0.519630689	0.531411761	0.148150424	0.011781072	0.757065683	0.999821727	FALSE
440	PF3D7_0419400.2o4_8826	-0.761473807	-0.729690159	0.193355621	0.031783649	0.687770964	0.999821727	FALSE
441	PF3D7_0419400.3o4_9115	-0.552040934	-0.336453393	0.943374117	0.215587541	0.102554199	0.999821727	FALSE
442	PF3D7_0419400.4o4_8537	-0.852792257	-1.019164944	0.367469572	-0.166372687	0.457408923	0.999821727	FALSE
443	PF3D7_0419500.1o1_5301	-0.120376509	-0.152281259	0.2145862	-0.03190475	0.656406944	0.999821727	FALSE
444	PF3D7_0419700.1o1_8146	-0.328902055	-0.352547701	0.06480141	-0.023645646	0.891797492	0.999821727	FALSE
445	PF3D7_0419900.iso1.exon3.amp1_2826	-0.659748073	-0.71553381	0.08255983	-0.055785737	0.862517304	0.999821727	FALSE
446	PF3D7_0419900.iso1.exon3.amp5_seg1_2006	-0.161546266	-0.194995334	0.038041459	-0.033449067	0.936298523	0.999821727	FALSE
447	PF3D7_0420000.s2_5994	-0.403647628	-0.244722885	0.36063664	0.158924743	0.465220088	0.999821727	FALSE
448	PF3D7_0420300.iso1.exon1.amp1_521	-0.349154056	-0.24909081	0.48209312	0.100063246	0.341707759	0.999821727	FALSE
449	PF3D7_0420300.iso1.exon1.amp3_1099	-0.449839674	-0.332229385	0.500408153	0.117610289	0.32581757	0.999821727	FALSE
450	PF3D7_0420300.iso1.exon1.amp4_seg1_3445	-0.061707411	0.127283648	0.257127547	0.188991059	0.596114191	0.999821727	FALSE
451	PF3D7_0420600.iso1.exon1.amp1_2477	-0.592155809	-0.629617	0.111628739	-0.03746119	0.815183805	0.999821727	FALSE
452	PF3D7_0420700.e2s1_8336	1.818267447	2.0709996	0.525962133	0.252732153	0.304776358	0.999821727	FALSE
453	PF3D7_0420900.iso1.exon1.amp1_4190	0.471106109	0.505330314	0.142271364	0.034224205	0.766304238	0.999821727	FALSE
454	PF3D7_0421200.iso1.exon2.amp1_3312	1.008963608	1.186938555	0.318351897	0.177974947	0.515869806	0.999821727	FALSE
455	PF3D7_0421300.iso1.exon1.amp1_2739	1.855631997	2.028325334	0.639761753	0.172693338	0.225795801	0.999821727	FALSE
456	PF3D7_0421800.iso1.exon1.amp1_1236	0.134514756	0.177399599	0.266185291	0.042884843	0.583743106	0.999821727	FALSE
457	PF3D7_0422000.5o5_7285	-0.289743719	-0.318440205	0.246348603	-0.028696486	0.611054051	0.999821727	FALSE
458	PF3D7_0422100 (renamed)_7011	1.895168715	2.114719558	0.185503211	0.219550843	0.699571594	0.999821727	FALSE
459	PF3D7_0422200.iso1.exon1.amp4_2550	-0.497303575	-0.355370074	0.265950083	0.141933501	0.584062214	0.999821727	FALSE
460	PF3D7_0422300.e3s1_6907	0.023577336	-0.045738971	1.118105837	-0.069316307	0.066755083	0.999821727	FALSE
461	PF3D7_0422400.e2s1_5434	-0.507770125	-0.488800111	0.033041432	0.018970014	0.94465076	0.999821727	FALSE
462	PF3D7_0422500.e1s2_8254	-0.49185977	-0.397619346	0.160700165	0.094240423	0.737509883	0.999821727	FALSE
463	PF3D7_0422500.e1s3_5652	0.249893764	0.396665426	0.120071732	0.146771661	0.801601553	0.999821727	FALSE
464	PF3D7_0422700.e1s1_4878	-0.316084778	-0.338041041	0.035564747	-0.021956263	0.94043456	0.999821727	FALSE
465	PF3D7_0423100.iso1.exon1.amp1_3832	-0.946199292	-0.879290807	1.142213479	0.066908485	0.063033034	0.999821727	FALSE
466	PF3D7_0423400.1o1_7833	-0.423340719	-0.404520196	0.103501614	0.018820523	0.828332609	0.999821727	FALSE
467	PF3D7_0423700.1o1_6673	1.318669465	1.391320915	0.193024439	0.07265145	0.688266536	0.999821727	FALSE
468	PF3D7_0424200.iso1.exon1.amp2_2772	-0.162978882	-0.147398701	0.011944758	0.01558018	0.979971009	0.999821727	FALSE
469	PF3D7_0424600.e2s1_8623	0.067518399	0.130563589	0.179193482	0.06304519	0.709128983	0.999821727	FALSE
470	PF3D7_0424800.2o2_6416	1.084830628	1.043030613	0.115015383	-0.041800015	0.809725919	0.999821727	FALSE
471	PF3D7_0425100.2o2_8127	0.481991509	0.341091124	0.200973283	-0.140900385	0.676424852	0.999821727	FALSE
472	PF3D7_0425200.2o2_5531	0.407645335	0.556065972	0.342454325	0.148420637	0.48651261	0.999821727	FALSE
473	PF3D7_0425300.1o1_8130	-0.119882567	-0.091056002	0.278086546	0.028826565	0.567747252	0.999821727	FALSE
474	PF3D7_0425500.iso1.exon1.amp1_1565	1.070532103	0.9988606	0.069769677	-0.071671502	0.883582229	0.999821727	FALSE
475	PF3D7_0425700.iso1.exon1.amp1_4168	0.534482057	0.524492207	0.00909521	-0.00998985	0.984748183	0.999821727	FALSE
476	PF3D7_0425800.iso1.exon1.amp1_3955	-0.257905439	-0.208739258	0.075596957	0.04916618	0.873969154	0.999821727	FALSE
477	PF3D7_0425800.iso1.exon1.amp2_4244	-0.147001756	-0.002445409	0.547528657	0.144556348	0.288010849	0.999821727	FALSE
478	PF3D7_0425800.iso1.exon2.amp1_4183	1.308996257	1.3733852	0.180401232	0.064388944	0.707294504	0.999821727	FALSE
479	PF3D7_0425900.iso1.exon2.amp1_4457	-0.535158139	-0.264215859	1.146220639	0.27094228	0.062437648	0.999821727	FALSE
480	PF3D7_0426000.iso1.exon1.amp1_4198	-0.081470036	-0.064201571	0.052171964	0.017268465	0.912752151	0.999821727	FALSE
481	PF3D7_0500100.iso1.exon1.amp1_2232	-0.558341611	-0.45061712	0.242510415	0.107724492	0.616430204	0.999821727	FALSE
482	PF3D7_0500100.iso1.exon2.amp1_1299	1.693029849	2.13350705	0.506321602	0.440477202	0.320832683	0.999821727	FALSE
483	PF3D7_0500400.iso1.exon1.amp1_3882	0.392606902	0.527772108	0.132719979	0.135165206	0.781413569	0.999821727	FALSE
484	PF3D7_0500500.iso1.exon1.amp1_2721	2.236407336	2.27331875	0.047486134	0.036911414	0.920549837	0.999821727	FALSE
485	PF3D7_0500800.e1s1_7120	-0.528860778	-0.491864453	0.230597338	0.036996325	0.633301802	0.999821727	FALSE
486	PF3D7_0500800.e2s1_8081	0.500167129	0.565989815	0.041972826	0.065822686	0.929738308	0.999821727	FALSE
487	PF3D7_0500900.iso1.exon2.amp1_442	-0.01759199	0.373232784	0.228441894	0.390824773	0.636383879	0.999821727	FALSE
488	PF3D7_0501000.e1s1_4842	-0.582534284	-0.637431121	0.578591932	-0.054896837	0.265394278	0.999821727	FALSE
489	PF3D7_0501000.e2s1_5152	0.123232529	0.124738225	0.003347026	0.001505696	0.994386933	0.999821727	FALSE
490	PF3D7_0501100.1.e3s1_7453	0.312436441	0.317475727	0.005981805	0.005039286	0.989968583	0.999821727	FALSE
491	PF3D7_0501100.1.e4s1_6302	-0.781539101	-0.842541913	0.293541319	-0.061002811	0.547421998	0.999821727	FALSE
492	PF3D7_0501100.iso2.exon3.amp1_2407	-0.294267953	-0.139129708	0.131156908	0.155138245	0.783897576	0.999821727	FALSE
493	PF3D7_0501200.e2_7703	0.224177686	0.267925805	0.100782104	0.043748119	0.832747992	0.999821727	FALSE
494	PF3D7_0501500.e1s1_8931	-0.169615651	0.12187646	0.332183382	0.29149211	0.498865579	0.999821727	FALSE
495	PF3D7_0501600.e1s1_8642	-0.7505312	-0.642881964	0.163634329	0.107649236	0.732971377	0.999821727	FALSE
496	PF3D7_0501800.e1s1_4880	0.478687942	0.600000236	0.17114999	0.121312294	0.721406756	0.999821727	FALSE
497	PF3D7_0501800.e1s2_6042	0.656636113	0.606433686	0.046933821	-0.050202427	0.921469676	0.999821727	FALSE
498	PF3D7_0501900.iso1.exon2.amp1_2980	-0.71388649	-0.775284339	0.247399713	-0.061397849	0.609586889	0.999821727	FALSE
499	PF3D7_0502000.iso1.exon2.amp1_1211	-0.512528646	-0.440281637	0.534460825	0.072247009	0.298063008	0.999821727	FALSE
500	PF3D7_0502200.2o2_5863	-0.840302155	-0.671581884	0.310955464	0.168720271	0.525135644	0.999821727	FALSE
501	PF3D7_0502400.1o1_5886	0.991894072	0.996918334	0.004035377	0.005024261	0.993232582	0.999821727	FALSE
502	PF3D7_0502700.iso1.exon2.amp1_3857	0.378533977	0.335390038	0.060140655	-0.04314394	0.899519257	0.999821727	FALSE
503	PF3D7_0502800.1o1_6679	-0.76932149	-0.751061851	0.081933758	0.018259639	0.863545387	0.999821727	FALSE
504	PF3D7_0503000.5o5_8733	-0.84058099	-0.881042927	0.107219176	-0.040461937	0.822309219	0.999821727	FALSE
505	PF3D7_0503600.e1s1_5436	-0.433067918	-0.470493092	0.346027689	-0.037425174	0.482269852	0.999821727	FALSE
506	PF3D7_0503600.e7s1_7736	-0.733978531	-0.684178835	0.359706049	0.049799696	0.466291968	0.999821727	FALSE
507	PF3D7_0503900.2o2_5032	-0.43979241	-0.412586848	0.138699103	0.027205562	0.77194098	0.999821727	FALSE
508	PF3D7_0504200.2o3_7328	-0.594189696	-0.400374561	0.522782103	0.193815135	0.307324456	0.999821727	FALSE
509	PF3D7_0504400.iso1.exon1.amp1_2757	-0.623381499	-0.515830917	0.284191704	0.107550582	0.559657296	0.999821727	FALSE
510	PF3D7_0504500.5o6_9016	0.196851091	0.140645727	0.048780518	-0.056205364	0.918394729	0.999821727	FALSE
511	PF3D7_0504600_5397	-0.249400923	-0.085989914	0.215649779	0.163411009	0.654857195	0.999821727	FALSE
512	PF3D7_0504800.iso1.exon1.amp1_1378	0.108138688	0.022086743	0.114015648	-0.086051946	0.811335741	0.999821727	FALSE
513	PF3D7_0504800.iso1.exon1.amp2_1667	-0.336299548	-0.455396418	0.487213851	-0.11909687	0.337195748	0.999821727	FALSE
514	PF3D7_0505100.iso1.exon1.amp1_1083	-0.45477357	-0.597272422	0.396093752	-0.142498852	0.425818076	0.999821727	FALSE
515	PF3D7_0505100.iso1.exon1.amp2_3685	0.161752967	0.315235924	0.160555097	0.153482957	0.73773461	0.999821727	FALSE
516	PF3D7_0505100.iso1.exon2.amp1_507	-0.345889218	-0.074817696	0.308607935	0.271071521	0.528101532	0.999821727	FALSE
517	PF3D7_0505100.iso1.exon2.amp2_1332	0.033243191	0.152914184	0.118621787	0.119670993	0.803928231	0.999821727	FALSE
518	PF3D7_0505200.e1s1_6332	-0.629201048	-0.662339363	0.252089238	-0.033138315	0.603068174	0.999821727	FALSE
519	PF3D7_0505400.1o1_4753	-0.457536927	-0.415318662	0.109620141	0.042218265	0.818426873	0.999821727	FALSE
520	PF3D7_0505500.e1s1_4811	-0.224565429	-0.344555131	0.192840897	-0.119989702	0.688541264	0.999821727	FALSE
521	PF3D7_0505500.e2_6247	-0.195768183	-0.12236025	0.140279905	0.073407934	0.769444473	0.999821727	FALSE
522	PF3D7_0506200.1o1_7857	-0.476565016	-0.452533391	0.080448823	0.024031625	0.865985128	0.999821727	FALSE
523	PF3D7_0506300.iso1.exon1.amp1_3900	0.551669755	0.578486012	0.028949328	0.026816257	0.951492838	0.999821727	FALSE
524	PF3D7_0506800.e1_6284	-0.471962586	-0.626990905	0.134101205	-0.155028319	0.779221169	0.999821727	FALSE
525	PF3D7_0506900.1o1_6208	-0.576781236	-0.574239542	0.004249239	0.002541694	0.992873944	0.999821727	FALSE
526	PF3D7_0507200.iso1.exon1.amp1_150	-0.606310318	-0.481012709	0.456006597	0.125297608	0.365542448	0.999821727	FALSE
527	PF3D7_0507300 (plasmodb revised)_5405	-0.192697371	-0.045240165	0.269665454	0.147457206	0.57903498	0.999821727	FALSE
528	PF3D7_0507700.e1s1_5454	-0.323481565	-0.217549941	0.271506741	0.105931623	0.576554206	0.999821727	FALSE
529	PF3D7_0507900.iso1.exon2.amp1_43	-0.714657499	-0.696962631	0.090570974	0.017694868	0.849391939	0.999821727	FALSE
530	PF3D7_0508000.1o1_6429	-0.580540718	-0.499206675	0.384840791	0.081334044	0.438019691	0.999821727	FALSE
531	PF3D7_0508400.4o4_6424	-0.26702946	-0.061476992	0.582748344	0.205552469	0.262500799	0.999821727	FALSE
532	PF3D7_0508500.s3_4828	-0.721467875	-0.545618975	0.42146054	0.1758489	0.399340865	0.999821727	FALSE
533	PF3D7_0508600.iso1.exon1.amp1_3875	-0.400759676	-0.419263718	0.154247559	-0.018504042	0.747536023	0.999821727	FALSE
534	PF3D7_0508900.iso1.exon1.amp1_1678	-1.21349909	-1.250785797	0.622636717	-0.037286707	0.236253023	0.999821727	FALSE
535	PF3D7_0508900.iso1.exon1.amp2_1967	-0.8600759	-0.774419817	0.483784825	0.085656083	0.340211167	0.999821727	FALSE
536	PF3D7_0508900.iso1.exon1.amp4_4215	-0.459354767	-0.468106847	0.043621715	-0.008752079	0.926988804	0.999821727	FALSE
537	PF3D7_0509000.e5s1_6290	-0.265926375	-0.232676785	0.133688475	0.033249591	0.779876029	0.999821727	FALSE
538	PF3D7_0509100.iso1.exon1.amp1_2855	-0.299175161	-0.250703873	0.026409053	0.048471288	0.955742818	0.999821727	FALSE
539	PF3D7_0509100.iso1.exon1.amp2_3351	-0.737037881	-0.741578756	0.006850695	-0.004540875	0.988511597	0.999821727	FALSE
540	PF3D7_0509200.iso1.exon4.amp1_392	-0.416389969	-0.392325088	0.150737071	0.024064881	0.753016308	0.999821727	FALSE
541	PF3D7_0509500.1o1_6441	-0.104511497	0.030056866	0.179640495	0.134568363	0.708449727	0.999821727	FALSE
542	PF3D7_0509600.2o2_7637	-0.736084521	-0.665443482	0.284100406	0.070641039	0.559777693	0.999821727	FALSE
543	PF3D7_0509700.e4s1_9186	0.023653568	0.055147964	0.138025953	0.031494396	0.773005078	0.999821727	FALSE
544	PF3D7_0509800.2o4_8246	-0.804024516	-0.650888954	0.255891534	0.153135563	0.597815385	0.999821727	FALSE
545	PF3D7_0509900.iso1.exon1.amp1_3597	0.515419836	0.60306976	0.358459752	0.087649924	0.467730511	0.999821727	FALSE
546	PF3D7_0510100.iso1.exon1.amp2_4582	-0.352649346	-0.254903203	0.592804064	0.097746142	0.255626575	0.999821727	FALSE
547	PF3D7_0510100.iso1.exon1.amp3_1915	-0.124069874	-0.124437392	0.002484673	-0.000367518	0.995833103	0.999821727	FALSE
548	PF3D7_0510400.1o1_8464	0.47876225	0.418884502	0.088071104	-0.059877748	0.853481616	0.999821727	FALSE
549	PF3D7_0510800.1o1_4938	0.890023736	0.755372399	0.222385341	-0.134651337	0.645091737	0.999821727	FALSE
550	PF3D7_0511100.iso1.exon2.amp1_1537	-0.604325206	-0.66671045	0.475302122	-0.062385244	0.347775247	0.999821727	FALSE
551	PF3D7_0511300.iso1.exon1.amp1_2538	-0.628294705	-0.565475357	0.165807696	0.062819349	0.729618131	0.999821727	FALSE
552	PF3D7_0511400.1o1_4698	0.411190017	0.445820552	0.196670501	0.034630536	0.682821147	0.999821727	FALSE
553	PF3D7_0511400_8865	1.018764783	1.134478874	0.235155277	0.115714091	0.626813968	0.999821727	FALSE
554	PF3D7_0511500.s1_7710	-0.663984755	-0.626898979	0.147473833	0.037085776	0.758126445	0.999821727	FALSE
555	PF3D7_0511500.s3_7138	0.363901794	0.230460542	0.144434851	-0.133441252	0.762898885	0.999821727	FALSE
556	PF3D7_0511500.s4_7427	-0.717452362	-0.398901123	0.356620226	0.318551239	0.469860122	0.999821727	FALSE
557	PF3D7_0511600.1o1_5809	-0.085404996	-0.106364668	0.013900822	-0.020959672	0.976692305	0.999821727	FALSE
558	PF3D7_0512100.iso1.exon2.amp1_3546	-1.015439578	-0.912064446	0.432062652	0.103375132	0.388693325	0.999821727	FALSE
559	PF3D7_0512600.e6s1_7173	-0.611943144	-0.650952311	0.095014568	-0.039009167	0.842136644	0.999821727	FALSE
560	PF3D7_0512900.iso1.exon1.amp1_3002	-0.684578077	-0.535723472	1.636704056	0.148854606	0.021584462	0.999821727	FALSE
561	PF3D7_0513000.e1s1_5733	-0.566057272	-0.523461606	0.258288852	0.042595665	0.594518663	0.999821727	FALSE
562	PF3D7_0513100.2o3_7569	0.071399021	0.161083476	0.088100543	0.089684455	0.853433421	0.999821727	FALSE
563	PF3D7_0513200.e2s3_5488	0.274535522	0.311575189	0.301029772	0.037039667	0.537757791	0.999821727	FALSE
564	PF3D7_0513300.e1s1_8334	-0.626032717	-0.606407263	0.102587697	0.019625453	0.829815594	0.999821727	FALSE
565	PF3D7_0513400.iso1.exon2.amp1_92	-0.413600655	-0.41934437	0.031493387	-0.005743715	0.94723848	0.999821727	FALSE
566	PF3D7_0513700.e3s1_8904	-0.865871257	-0.824617204	0.277256417	0.041254052	0.568853345	0.999821727	FALSE
567	PF3D7_0514000.iso1.exon2.amp1_129	-0.521719488	-0.530244615	0.03953359	-0.008525127	0.933807871	0.999821727	FALSE
568	PF3D7_0514100.iso1.exon1.amp2_3648	-0.54301386	-0.447710245	0.378824224	0.095303616	0.444659055	0.999821727	FALSE
569	PF3D7_0514600.iso1.exon2.amp1_2392	-0.710280119	-0.618368973	1.583202051	0.091911146	0.024010235	0.999821727	FALSE
570	PF3D7_0514900.1o1_8458	-0.763840301	-0.772434321	0.077188082	-0.00859402	0.871348807	0.999821727	FALSE
571	PF3D7_0516000.iso1.exon1.amp1_2533	-0.699454714	-0.618671529	0.156845864	0.080783185	0.743491324	0.999821727	FALSE
572	PF3D7_0516400.1o1_9029	1.122820286	1.066172439	0.08714176	-0.056647846	0.85500341	0.999821727	FALSE
573	PF3D7_0516500.5o6_7013	-0.733570567	-0.720969446	0.153309203	0.012601121	0.74899916	0.999821727	FALSE
574	PF3D7_0516600.s1_6862	-0.339164318	-0.293208479	0.128650877	0.045955839	0.787886613	0.999821727	FALSE
575	PF3D7_0516600.s2_5122	0.681587719	0.623206238	0.061432243	-0.05838148	0.897378008	0.999821727	FALSE
576	PF3D7_0516800.iso1.exon1.amp2_530	-0.547867249	-0.604461248	0.221260491	-0.056593999	0.646716665	0.999821727	FALSE
577	PF3D7_0516800.iso1.exon1.amp3_1048	-0.442071749	-0.463745019	0.140840053	-0.02167327	0.768560659	0.999821727	FALSE
578	PF3D7_0517600.1o1_7287	-0.175855892	-0.228249325	0.087114868	-0.052393434	0.855047457	0.999821727	FALSE
579	PF3D7_0517700_5368	-0.613714089	-0.577608602	0.394451247	0.036105486	0.427581515	0.999821727	FALSE
580	PF3D7_0517900.2o2_7334	-0.224892998	-0.099390941	0.125502562	0.125502057	0.792909178	0.999821727	FALSE
581	PF3D7_0518400.iso1.exon1.amp1_4147	-0.781138043	-0.694403396	0.455943827	0.086734647	0.365601531	0.999821727	FALSE
582	PF3D7_0518600.iso1.exon1.amp1_1407	-0.224192758	-0.120290677	0.126394435	0.10390208	0.791485109	0.999821727	FALSE
583	PF3D7_0518600.iso1.exon1.amp2_1924	-0.470786374	-0.428474545	0.043097456	0.042311829	0.927862869	0.999821727	FALSE
584	PF3D7_0518700.e1s1_5478	-0.608401866	-0.619011024	0.021281357	-0.010609158	0.964326906	0.999821727	FALSE
585	PF3D7_0518700.e3s1_8039	-0.724686825	-0.688681413	0.233575259	0.036005412	0.629058422	0.999821727	FALSE
586	PF3D7_0518800.iso1.exon7.amp1_2109	0.307074612	0.306106052	0.000839716	-0.000968561	0.998591754	0.999821727	FALSE
587	PF3D7_0518900.iso1.exon1.amp1_2982	-0.592279807	-0.56186186	0.182122796	0.030417948	0.704683728	0.999821727	FALSE
588	PF3D7_0519000.iso1.exon1.amp1_4167	-0.159973298	-0.120726701	0.218161294	0.039246597	0.651205989	0.999821727	FALSE
589	PF3D7_0519100.iso1.exon1.amp1_673	-0.578044445	-0.544196564	0.118077648	0.033847882	0.804802031	0.999821727	FALSE
590	PF3D7_0519200.e2s1_5387	-0.813238643	-0.826847192	0.1306841	-0.013608549	0.784649572	0.999821727	FALSE
591	PF3D7_0519300.1o1_9072	-0.823429472	-0.837248621	0.036293777	-0.013819149	0.939216858	0.999821727	FALSE
592	PF3D7_0519900.1o1_7902	-0.815728247	-0.856243705	0.068010366	-0.040515458	0.886489375	0.999821727	FALSE
593	PF3D7_0520000.e3s1_9191	-0.521933103	-0.476114943	0.112031938	0.04581816	0.81453334	0.999821727	FALSE
594	PF3D7_0520100.e1s1_8338	-0.038707611	-0.051689908	0.017283948	-0.012982298	0.971022955	0.999821727	FALSE
595	PF3D7_0520400.e1s1_6896	0.336278182	0.402124043	0.193204889	0.065845861	0.687996493	0.999821727	FALSE
596	PF3D7_0521200.iso1.exon1.amp1_717	-0.615043096	-0.466172245	0.269831711	0.148870851	0.57881069	0.999821727	FALSE
597	PF3D7_0521300.iso1.exon3.amp1_2837	-0.907619274	-0.874647314	0.091785195	0.03297196	0.847407585	0.999821727	FALSE
598	PF3D7_0521300.iso1.exon3.amp2_seg2_577	-0.283563776	-0.395813021	0.276358906	-0.112249244	0.570050856	0.999821727	FALSE
599	PF3D7_0521400.1o1_8497	0.201763556	0.050228469	0.187522282	-0.151535087	0.696527323	0.999821727	FALSE
600	PF3D7_0521600.iso1.exon1.amp1_1810	0.113890982	0.169688788	0.030989926	0.055797805	0.948080241	0.999821727	FALSE
601	PF3D7_0521700.e1s1_9110	-0.606243095	-0.74506186	0.417642886	-0.138818765	0.403235056	0.999821727	FALSE
602	PF3D7_0521800.iso1.exon1.amp1_1519	-0.816321854	-0.879474462	0.295191682	-0.063152608	0.545281731	0.999821727	FALSE
603	PF3D7_0522400.e3s3_9155	-0.468656562	-0.406260857	0.109743696	0.062395705	0.818227254	0.999821727	FALSE
604	PF3D7_0522400.e4s2_8874	0.134785419	0.104068838	0.03838812	-0.03071658	0.9357198	0.999821727	FALSE
605	PF3D7_0522400.e4s3_7140	-0.520307744	-0.016921547	0.598553258	0.503386196	0.251775489	0.999821727	FALSE
606	PF3D7_0522500.iso1.exon1.amp1_2655	-0.538479737	-0.490785418	0.255733547	0.047694319	0.598033055	0.999821727	FALSE
607	PF3D7_0523100.e2s1_7775	-0.731001858	-0.633565604	0.577395929	0.097436253	0.266232573	0.999821727	FALSE
608	PF3D7_0523400.3o3_6752	-0.512959939	-0.451150657	0.296901964	0.061809282	0.54306995	0.999821727	FALSE
609	PF3D7_0523800.1o1_7352	-0.940293524	-0.95651907	0.128131137	-0.016225547	0.788714914	0.999821727	FALSE
610	PF3D7_0524100.iso1.exon1.amp1_509	-0.458229726	-0.3762994	0.57819469	0.081930326	0.265672427	0.999821727	FALSE
611	PF3D7_0524100.iso1.exon1.amp2_798	-0.548883183	-0.520045621	0.031595391	0.028837561	0.947067945	0.999821727	FALSE
612	PF3D7_0524200.iso1.exon1.amp1_3223	-0.424195606	-0.50853171	1.14812576	-0.084336105	0.062156845	0.999821727	FALSE
613	PF3D7_0524300.1o1_8762	-0.801726052	-0.676976911	0.29363646	0.12474914	0.547298457	0.999821727	FALSE
614	PF3D7_0524400.e1s1_7190	-0.252823557	-0.038727938	0.204370307	0.214095619	0.671398173	0.999821727	FALSE
615	PF3D7_0524500.1o1_5233	0.209961351	0.137525092	0.177972678	-0.072436259	0.710985719	0.999821727	FALSE
616	PF3D7_0524700.1o1_6961	-0.832508523	-0.828393805	0.020515054	0.004114718	0.965610284	0.999821727	FALSE
617	PF3D7_0524700_8580	-1.181902317	-1.096064596	0.320695233	0.085837721	0.51295926	0.999821727	FALSE
618	PF3D7_0524800.iso1.exon1.amp1_2188	1.050179707	1.314461712	0.220896752	0.264282006	0.647242622	0.999821727	FALSE
619	PF3D7_0525000.1o1_7931	-0.40606906	-0.271290844	0.253284107	0.134778216	0.601414329	0.999821727	FALSE
620	PF3D7_0525100.e1s1_4897	-0.526334432	-0.504606867	0.024633854	0.021727565	0.958713864	0.999821727	FALSE
621	PF3D7_0525200.iso1.exon1.amp2_3987	-0.632141228	-0.595023838	0.302670697	0.03711739	0.535656301	0.999821727	FALSE
622	PF3D7_0525300.1o1_6447	0.031778072	-0.072399794	0.152885461	-0.104177866	0.749660301	0.999821727	FALSE
623	PF3D7_0525800.e1s1_6607	0.917087085	1.028882929	0.335620709	0.111795844	0.494705404	0.999821727	FALSE
624	PF3D7_0526200.iso2.exon7.amp1_2452	0.681790164	0.771877203	0.20672969	0.090087039	0.667919083	0.999821727	FALSE
625	PF3D7_0526600.iso1.exon1.amp4_3706	2.567177618	2.607096089	0.339777101	0.039918471	0.489709964	0.999821727	FALSE
626	PF3D7_0526900.iso1.exon3.amp1_1800	-0.631435573	-0.624217169	0.010138667	0.007218404	0.982998759	0.999821727	FALSE
627	PF3D7_0527200.e2s1_8350	0.823638926	0.878289882	0.052876549	0.054650956	0.911580652	0.999821727	FALSE
628	PF3D7_0527600.6o10_4989	-0.456939069	-0.661041878	1.539813371	-0.204102808	0.026218634	0.999821727	FALSE
629	PF3D7_0528200.e2s1_7765	-0.32959225	-0.412983041	0.069815426	-0.083390791	0.883506662	0.999821727	FALSE
630	PF3D7_0528300.1o1_5292	-0.192246083	-0.278756497	0.255819594	-0.086510415	0.597914495	0.999821727	FALSE
631	PF3D7_0528400.4o8_8756	-0.506020857	-0.426464079	0.095124914	0.079556778	0.841956713	0.999821727	FALSE
632	PF3D7_0528500.iso1.exon5.amp1_2948	-0.727261833	-0.808298397	1.497323925	-0.081036564	0.028618857	0.999821727	FALSE
633	PF3D7_0529000.1o1_7059	-0.388058768	-0.268641255	0.098080626	0.119417514	0.837141499	0.999821727	FALSE
634	PF3D7_0529400.1.e2s1_8277	-0.884092064	-0.921251451	0.31125709	-0.037159387	0.524755441	0.999821727	FALSE
635	PF3D7_0529400.1.e5s1_7458	-0.073292163	-0.042028656	0.054172028	0.031263507	0.909427398	0.999821727	FALSE
636	PF3D7_0529400.1.e7s1_6001	-0.221803703	-0.112221223	0.167535941	0.10958248	0.726956857	0.999821727	FALSE
637	PF3D7_0529700.iso1.exon2.amp1_3636	-0.543932335	-0.419223984	0.405574564	0.12470835	0.415756064	0.999821727	FALSE
638	PF3D7_0530100.2o2_9005	2.483977922	2.682093664	0.197166567	0.198115742	0.682082062	0.999821727	FALSE
639	PF3D7_0530900.iso1.exon1.amp1_818	0.29810415	0.445100614	0.297073352	0.146996463	0.542848655	0.999821727	FALSE
640	PF3D7_0530900.iso1.exon1.amp2_1107	-0.376990156	-0.401007734	0.037407838	-0.024017578	0.937356427	0.999821727	FALSE
641	PF3D7_0530900.iso1.exon1.amp3_3077	-0.445328015	-0.40903249	0.061561797	0.036295525	0.897163286	0.999821727	FALSE
642	PF3D7_0531100.iso1.exon1.amp2_seg2_3774	-0.700924303	-0.692739038	0.051411853	0.008185265	0.914016272	0.999821727	FALSE
643	PF3D7_0531400.iso1.exon1.amp2_1631	-0.534240025	-0.529011575	0.00563063	0.00522845	0.990557458	0.999821727	FALSE
644	PF3D7_0532100_6557	2.786503568	2.850798893	0.148701081	0.064295325	0.756202836	0.999821727	FALSE
645	PF3D7_0532300.e2s1_9209	0.170057762	0.265518379	0.234038788	0.095460617	0.628399464	0.999821727	FALSE
646	PF3D7_0532400.e1s1_5131	-0.389563229	-0.394831036	0.005649932	-0.005267807	0.990525091	0.999821727	FALSE
647	PF3D7_0532400.e2s1_5163	0.128971709	0.202698254	0.104232956	0.073726544	0.827146505	0.999821727	FALSE
648	PF3D7_0533100.iso1.exon1.amp1_3129	-0.324079651	-0.16062419	0.582507235	0.163455461	0.262667808	0.999821727	FALSE
649	PF3D7_0533100.iso1.exon1.amp2_3418	0.372259578	0.525326331	0.604476965	0.153066753	0.247866896	0.999821727	FALSE
650	PF3D7_0533100.iso1.exon1.amp3_1389	-0.577197153	-0.558055549	0.059067894	0.019141604	0.901298511	0.999821727	FALSE
651	PF3D7_0600200.iso1.exon1.amp3_1938	-0.34344222	-0.298261762	0.142744115	0.045180458	0.765559574	0.999821727	FALSE
652	PF3D7_0600300.iso1.exon1.amp1_1286	1.024586685	1.020515068	0.00535792	-0.004071617	0.991014763	0.999821727	FALSE
653	PF3D7_0600400.iso1.exon1.amp1_3033	1.875320016	1.873180847	0.003843491	-0.00213917	0.993554369	0.999821727	FALSE
654	PF3D7_0600400.iso1.exon2.amp1_1895	-0.719133877	-0.683496155	0.132034349	0.035637723	0.782502776	0.999821727	FALSE
655	PF3D7_0600500.iso1.exon2.amp1_130	1.444642874	1.570155056	0.199160698	0.125512182	0.679115374	0.999821727	FALSE
656	PF3D7_0600700.iso1.exon1.amp1_4469	1.097132812	1.161263601	0.078894781	0.064130789	0.868540346	0.999821727	FALSE
657	PF3D7_0601000.iso1.exon1.amp1_3293	-0.576751915	-0.471094856	0.096276437	0.105657058	0.840079734	0.999821727	FALSE
658	PF3D7_0601200.iso1.exon2.amp1_695	0.696162934	0.806835735	0.106785993	0.110672801	0.823010334	0.999821727	FALSE
659	PF3D7_0601500.iso1.exon1.amp1_4480	0.12236071	0.245498512	0.536023204	0.123137803	0.29684402	0.999821727	FALSE
660	PF3D7_0601700.2o2_6415	-0.820848804	-0.82126012	0.002964639	-0.000411316	0.995028195	0.999821727	FALSE
661	PF3D7_0602000.iso1.exon1.amp2_4515	-0.541243691	-0.583767317	0.10263311	-0.042523626	0.829741884	0.999821727	FALSE
662	PF3D7_0602100.iso1.exon1.amp1_1671	1.516634702	1.464473878	0.077212629	-0.052160823	0.871308398	0.999821727	FALSE
663	PF3D7_0602100.iso1.exon1.amp2_1960	0.3522949	0.525842198	0.3106578	0.173547298	0.525511049	0.999821727	FALSE
664	PF3D7_0602200.1o3_6695	-0.109772218	-0.175750742	0.047428576	-0.065978525	0.920645689	0.999821727	FALSE
665	PF3D7_0602600.iso1.exon3.amp1_4131	0.191551981	0.253900427	0.147288008	0.062348446	0.758417894	0.999821727	FALSE
666	PF3D7_0602600.iso1.exon4.amp1_377	-0.416216221	-0.416455567	0.001526725	-0.000239346	0.99743961	0.999821727	FALSE
667	PF3D7_0602700.iso1.exon1.amp1_1591	0.687836709	0.818802211	0.087677496	0.130965502	0.854126053	0.999821727	FALSE
668	PF3D7_0603100.1o1_7881	-0.53774982	-0.48249138	0.116497969	0.055258441	0.807340686	0.999821727	FALSE
669	PF3D7_0603300.iso1.exon1.amp1_2181	-0.151181175	-0.136459679	0.027369684	0.014721496	0.954135425	0.999821727	FALSE
670	PF3D7_0603800.16o20_7091	0.012890226	0.155129157	0.623853464	0.142238931	0.235494387	0.999821727	FALSE
671	PF3D7_0604000.iso1.exon1.amp1_1983	-0.305425476	-0.073248778	0.153481929	0.232176698	0.748729739	0.999821727	FALSE
672	PF3D7_0604000.iso1.exon1.amp3_760	0.107474901	0.382115479	0.17653371	0.274640578	0.713177376	0.999821727	FALSE
673	PF3D7_0604100.iso1.exon1.amp2_3651	0.933072608	1.11326592	0.229007509	0.180193311	0.63557424	0.999821727	FALSE
674	PF3D7_0604500.iso1.exon1.amp3_3986	0.319393362	0.657557748	0.650731091	0.338164386	0.219341875	0.999821727	FALSE
675	PF3D7_0605000.iso1.exon1.amp1_1561	-0.629007614	-0.653843822	0.015584264	-0.024836208	0.973871005	0.999821727	FALSE
676	PF3D7_0605500.iso1.exon2.amp1_4494	-0.554290913	-0.468766715	0.155565333	0.085524199	0.745483447	0.999821727	FALSE
677	PF3D7_0605600.iso1.exon1.amp1_3384	-0.27252177	-0.228351074	0.045341208	0.044170697	0.924122881	0.999821727	FALSE
678	PF3D7_0605600.iso1.exon1.amp2_2481	-0.84896847	-0.763438597	0.248304673	0.085529874	0.608325498	0.999821727	FALSE
679	PF3D7_0605600.iso1.exon4.amp1_4428	-0.25626009	-0.166846679	0.155428402	0.089413411	0.745696613	0.999821727	FALSE
680	PF3D7_0606000.iso1.exon1.amp2_2795	-0.419648502	-0.434644854	0.062067408	-0.014996352	0.896325392	0.999821727	FALSE
681	PF3D7_0606100.iso1.exon4.amp1_4473	0.87931681	0.938854646	0.074347298	0.059537836	0.876028532	0.999821727	FALSE
682	PF3D7_0606500.iso1.exon5.amp1_1589	-0.196401881	-0.299588115	0.131324408	-0.103186234	0.783631239	0.999821727	FALSE
683	PF3D7_0606600.iso1.exon2.amp1_2254	-0.148967978	-0.197633737	0.154294983	-0.048665759	0.747462111	0.999821727	FALSE
684	PF3D7_0606700.iso1.exon1.amp1_3408	-0.49999582	-0.377760085	0.485036834	0.122235735	0.339107365	0.999821727	FALSE
685	PF3D7_0606800.1o1_4981	0.887669106	1.010970835	0.294270741	0.123301728	0.546475327	0.999821727	FALSE
686	PF3D7_0607300.2o2_5577	-0.612472437	-0.548829824	0.579512187	0.063642614	0.264750996	0.999821727	FALSE
687	PF3D7_0607600.1o5_6489	-0.184848146	-0.231870667	0.199820302	-0.047022521	0.678135615	0.999821727	FALSE
688	PF3D7_0607700.iso1.exon1.amp2_seg1_2869	-0.909036629	-0.771145557	0.464985524	0.137891072	0.357177042	0.999821727	FALSE
689	PF3D7_0608100.iso1.exon1.amp1_4297	0.11292087	0.227654559	0.269956288	0.114733688	0.578642667	0.999821727	FALSE
690	PF3D7_0608100.iso1.exon1.amp2_2496	0.932042487	1.155553174	0.352346604	0.223510687	0.474836809	0.999821727	FALSE
691	PF3D7_0608310.iso1.exon3.amp1_440	-0.700118086	-0.627195152	0.325207302	0.072922934	0.507389093	0.999821727	FALSE
692	PF3D7_0608400.iso1.exon2.amp1_1521	0.071336688	-0.231291051	0.186137694	-0.302627738	0.698614207	0.999821727	FALSE
693	PF3D7_0608500.2o2_7844	-0.540485041	-0.471542935	0.434276006	0.068942106	0.386501376	0.999821727	FALSE
694	PF3D7_0609000.iso1.exon1.amp1_3985	-0.230752268	-0.166854258	0.169842653	0.06389801	0.723412068	0.999821727	FALSE
695	PF3D7_0609000.iso1.exon1.amp2_4274	1.37274738	1.33538038	0.102984469	-0.037367	0.829171659	0.999821727	FALSE
696	PF3D7_0609300.iso1.exon1.amp1_745	-0.445765666	-0.496127079	0.077376589	-0.050361414	0.871038495	0.999821727	FALSE
697	PF3D7_0609900.iso1.exon1.amp2_2850	-0.55636819	-0.565867081	0.017617779	-0.009498892	0.970463636	0.999821727	FALSE
698	PF3D7_0610000.iso1.exon2.amp1_2117	-0.648341703	-0.741047343	0.238317741	-0.09270564	0.62233626	0.999821727	FALSE
699	PF3D7_0610200.1o1_5636	-0.047417088	0.001920982	0.154542251	0.049338069	0.747076787	0.999821727	FALSE
700	PF3D7_0611800.iso1.exon5.amp1_seg1_1151	-0.552847276	-0.556406174	0.048687712	-0.003558898	0.918549219	0.999821727	FALSE
701	PF3D7_0611800.iso1.exon5.amp3_508	-0.070993575	0.345180613	0.38773126	0.416174187	0.43485868	0.999821727	FALSE
702	PF3D7_0611900.iso1.exon1.amp1_2690	-0.57176566	-0.511623491	0.267303525	0.060142169	0.582227562	0.999821727	FALSE
703	PF3D7_0612700.1o1_6423	-0.518546664	-0.530623513	0.019686424	-0.012076849	0.966998184	0.999821727	FALSE
704	PF3D7_0613300.iso1.exon3.amp1_635	-0.675037303	-0.755672899	0.45276622	-0.080635596	0.368603483	0.999821727	FALSE
705	PF3D7_0613300.iso1.exon5.amp1_2341	-0.703593806	-0.601881745	0.74474322	0.101712062	0.171183925	0.999821727	FALSE
706	PF3D7_0613900.iso1.exon1.amp2_2265	-0.615360292	-0.634147258	0.023553308	-0.018786966	0.960522712	0.999821727	FALSE
707	PF3D7_0614000.iso1.exon1.amp1_157	-0.66913896	-0.553583483	0.485025762	0.115555477	0.339117112	0.999821727	FALSE
708	PF3D7_0614400.1o1_8430	-0.083027541	0.025243144	0.09532032	0.108270686	0.841638112	0.999821727	FALSE
709	PF3D7_0614800.iso1.exon1.amp1_433	-1.018577404	-0.983471586	0.200807146	0.035105817	0.676671217	0.999821727	FALSE
710	PF3D7_0615100.1o1_7590	-0.027192341	0.105718075	0.274874163	0.132910415	0.572035608	0.999821727	FALSE
711	PF3D7_0615600.5o8_7086	-0.165176776	-0.068610579	0.354711061	0.096566197	0.472078337	0.999821727	FALSE
712	PF3D7_0615800.2o3_6521	-0.505651165	-0.448009301	0.414592189	0.057641864	0.406369906	0.999821727	FALSE
713	PF3D7_0616000.1o3_5009	-0.475178144	-0.429171128	0.41279817	0.046007016	0.408222967	0.999821727	FALSE
714	PF3D7_0616300.iso1.exon1.amp1_967	0.530805389	0.464834062	0.148485622	-0.065971327	0.756540397	0.999821727	FALSE
715	PF3D7_0616800.iso1.exon1.amp1_2475	-0.301067285	-0.113179722	0.485992857	0.187887562	0.338266689	0.999821727	FALSE
716	PF3D7_0617000.1o1_8750	-0.784594625	-0.771268592	0.02214339	0.013326033	0.962883361	0.999821727	FALSE
717	PF3D7_0617400.s3 (renamed)_7396	0.756388534	0.814569609	0.673436045	0.058181074	0.206567639	0.999821727	FALSE
718	PF3D7_0617600.iso1.exon1.amp1_3292	1.131007256	1.301939613	0.143831086	0.170932356	0.76384857	0.999821727	FALSE
719	PF3D7_0617700.iso1.exon1.amp1_3596	0.592862883	0.60290524	0.013520526	0.010042358	0.977329706	0.999821727	FALSE
720	PF3D7_0618500.1o1_6121	-0.178420165	-0.120715714	0.397028587	0.057704451	0.424817085	0.999821727	FALSE
721	PF3D7_0618700.1o2_6708	1.07768201	1.114831492	0.078337621	0.037149481	0.869456926	0.999821727	FALSE
722	PF3D7_0618900.2o10_5031	-0.226296807	-0.242745201	0.045318234	-0.016448395	0.924161163	0.999821727	FALSE
723	PF3D7_0618900.iso2.exon2.amp1_2167	0.597643455	0.626254186	0.071940068	0.028610731	0.879998861	0.999821727	FALSE
724	PF3D7_0619000.1.12o14_6224	-0.942765632	-1.046800311	0.175089973	-0.104034679	0.715379666	0.999821727	FALSE
725	PF3D7_0619000.1.e12_5382	-0.851418208	-0.834482603	0.053798627	0.016935606	0.910047942	0.999821727	FALSE
726	PF3D7_0619000.1.s1 (renamed)_5662	-0.630844594	-0.643706633	0.017385923	-0.012862039	0.970852097	0.999821727	FALSE
727	PF3D7_0619000.iso2.exon13.amp1_3564	-0.674055467	-0.636762759	0.092689137	0.037292707	0.845931195	0.999821727	FALSE
728	PF3D7_0619400.iso1.exon1.amp1_727	-0.381273101	-0.309483145	0.185553748	0.071789956	0.699495312	0.999821727	FALSE
729	PF3D7_0619400.iso1.exon2.amp1_2684	-0.034248496	-0.133036539	0.054171114	-0.098788043	0.909428916	0.999821727	FALSE
730	PF3D7_0619700.iso1.exon2.amp1_2417	-0.607722646	-0.5229338	0.235336164	0.084788846	0.626557324	0.999821727	FALSE
731	PF3D7_0619900.iso1.exon1.amp1_2419	-0.187900743	-0.219223871	0.09154169	-0.031323128	0.847805426	0.999821727	FALSE
732	PF3D7_0620000.1o1_5588	0.061551672	0.116649106	0.151643338	0.055097434	0.751599815	0.999821727	FALSE
733	PF3D7_0620100.2o2_6690	-0.400190891	-0.455895341	0.101905011	-0.055704451	0.830923929	0.999821727	FALSE
734	PF3D7_0620200.1o1_6128	0.230896616	0.260608293	0.054511214	0.029711676	0.908863781	0.999821727	FALSE
735	PF3D7_0620400.1o1_7613	1.875461998	2.01608036	0.224224501	0.140618361	0.642440092	0.999821727	FALSE
736	PF3D7_0620600.1o1_5842	-0.543744946	-0.54300463	0.002842674	0.000740316	0.995232731	0.999821727	FALSE
737	PF3D7_0621200.iso1.exon1.amp1_1855	-0.221240451	-0.174089659	0.093604343	0.047150792	0.844437186	0.999821727	FALSE
738	PF3D7_0621400.1o1_8784	-0.091490487	0.166786774	0.658362831	0.258277261	0.214961377	0.999821727	FALSE
739	PF3D7_0621900.1o1_7648	-0.162973454	-0.023373033	0.733029689	0.139600421	0.176534508	0.999821727	FALSE
740	PF3D7_0622000.iso1.exon1.amp1_2087	-0.438711169	-0.459122386	0.138118704	-0.020411217	0.772858424	0.999821727	FALSE
741	PF3D7_0622000.iso1.exon3.amp1_2970	0.698379509	0.720482257	0.144803156	0.022102748	0.762319811	0.999821727	FALSE
742	PF3D7_0622100.iso1.exon1.amp1_seg1_3159	-0.7629269	-0.698853945	0.447043057	0.064072955	0.374064714	0.999821727	FALSE
743	PF3D7_0622100.iso1.exon1.amp2_seg2_2303	-0.364547906	-0.418838158	0.074237809	-0.054290252	0.876209021	0.999821727	FALSE
744	PF3D7_0622800.s1 (renamed)_4799	0.641949388	0.730547233	0.099625138	0.088597845	0.834628714	0.999821727	FALSE
745	PF3D7_0622800.s2 (renamed)_5666	0.120491315	0.153801003	0.037002115	0.033309688	0.93803391	0.999821727	FALSE
746	PF3D7_0623300.iso1.exon4.amp1_75	-0.510025969	-0.461986086	0.372643443	0.048039882	0.451563643	0.999821727	FALSE
747	PF3D7_0623400.1o1_5006	0.118545875	0.025249135	0.18240845	-0.09329674	0.704251004	0.999821727	FALSE
748	PF3D7_0623700.iso1.exon1.amp2_4528	-0.370631863	-0.249378999	0.176169954	0.121252864	0.713731936	0.999821727	FALSE
749	PF3D7_0623800.iso1.exon1.amp3_470	-0.692094919	-0.662930741	0.093212539	0.029164179	0.845076681	0.999821727	FALSE
750	PF3D7_0623900.1o1_5269	0.389016544	0.437872722	0.036634941	0.048856178	0.938647078	0.999821727	FALSE
751	PF3D7_0624500.iso1.exon1.amp1_1536	-0.561409025	-0.550171981	0.099195176	0.011237044	0.835327986	0.999821727	FALSE
752	PF3D7_0624600.iso1.exon1.amp2_2263	-0.50238855	-0.566490346	0.217674551	-0.064101796	0.651912691	0.999821727	FALSE
753	PF3D7_0624900.iso1.exon8.amp1_2391	-0.427772339	-0.387371436	0.242199278	0.040400903	0.616867297	0.999821727	FALSE
754	PF3D7_0625000.iso2.exon1.amp1_1527	0.144000913	-0.001766939	0.128738666	-0.145767852	0.787746739	0.999821727	FALSE
755	PF3D7_0625400.1o1_5288	0.053849258	0.196323359	0.780436186	0.142474101	0.155904565	0.999821727	FALSE
756	PF3D7_0625500.1o1_7006	-0.964410542	-0.849152352	0.67480323	0.11525819	0.205822948	0.999821727	FALSE
757	PF3D7_0625600.1o1_7626	0.953982461	1.060804624	0.358277189	0.106822163	0.467941526	0.999821727	FALSE
758	PF3D7_0626100.iso1.exon2.amp1_4098	-0.839764522	-0.748146576	0.922368789	0.091617947	0.108148049	0.999821727	FALSE
759	PF3D7_0626600.1o1_6969	-0.512766281	-0.399059416	0.265434644	0.113706865	0.584761912	0.999821727	FALSE
760	PF3D7_0626800.iso1.exon1.amp1_2938	-0.491041042	-0.430000366	0.688198382	0.061040676	0.198669909	0.999821727	FALSE
761	PF3D7_0626800.iso1.exon2.amp1_1841	0.438955859	0.507682513	0.639914575	0.068726654	0.225704593	0.999821727	FALSE
762	PF3D7_0626800.iso1.exon3.amp1_689	0.552490779	0.492347012	0.611678759	-0.060143768	0.243195184	0.999821727	FALSE
763	PF3D7_0626900.1o1_4986	0.714922124	0.883029889	0.321998228	0.168107766	0.5113461	0.999821727	FALSE
764	PF3D7_0627000.1o1_6672	-0.725791113	-0.711923285	0.070372756	0.013867827	0.882586188	0.999821727	FALSE
765	PF3D7_0627100.iso1.exon1.amp1_4595	0.038717705	0.257595647	0.767996445	0.218877942	0.161059692	0.999821727	FALSE
766	PF3D7_0627400.1o1_5247	-0.323559995	-0.378728465	0.292525206	-0.055168471	0.548742656	0.999821727	FALSE
767	PF3D7_0628000.1o1_7263	-0.365493676	-0.30688388	0.145684184	0.058609796	0.760935363	0.999821727	FALSE
768	PF3D7_0628100.iso1.exon1.amp10_2250	-0.678912808	-0.719122779	0.229670444	-0.04020997	0.634626075	0.999821727	FALSE
769	PF3D7_0628100.iso1.exon1.amp11_1613	-0.774795634	-0.736679341	0.176474493	0.038116293	0.71326764	0.999821727	FALSE
770	PF3D7_0628100.iso1.exon1.amp6_2244	-0.681461601	-0.660054088	0.097549	0.021407513	0.838006954	0.999821727	FALSE
771	PF3D7_0628100.iso1.exon1.amp7_1383	-0.062582644	-0.171904186	0.066377445	-0.109321542	0.889189604	0.999821727	FALSE
772	PF3D7_0628100.iso1.exon1.amp9_1961	0.897370923	0.874234745	0.026075465	-0.023136178	0.95630106	0.999821727	FALSE
773	PF3D7_0628200.s1_6574	-0.586979469	-0.480274748	0.713539757	0.106704721	0.185826575	0.999821727	FALSE
774	PF3D7_0628200.s2 (renamed)_6863	0.480290651	0.455203839	0.155394503	-0.025086812	0.745749389	0.999821727	FALSE
775	PF3D7_0628600.iso1.exon3.amp1_4371	-0.862976019	-0.84543319	0.237602981	0.01754283	0.623346569	0.999821727	FALSE
776	PF3D7_0629000.iso1.exon1.amp1_120	-0.436494565	-0.251451873	0.374159319	0.185042692	0.449862364	0.999821727	FALSE
777	PF3D7_0629300.1o1_7935	0.913076391	1.0349276	0.115699429	0.121851209	0.808625091	0.999821727	FALSE
778	PF3D7_0629500.1o2_8488	-0.661470753	-0.744514385	0.050908654	-0.083043632	0.914853299	0.999821727	FALSE
779	PF3D7_0629600.iso1.exon2.amp1_3286	-0.404244333	-0.483919578	0.098643761	-0.079675245	0.836225055	0.999821727	FALSE
780	PF3D7_0629700.s3 (renamed)_7149	-0.548399747	-0.604401419	0.105954956	-0.056001672	0.824355941	0.999821727	FALSE
781	PF3D7_0629700.s5 (renamed)_7727	0.178744373	0.151908388	0.068360216	-0.026835985	0.885911097	0.999821727	FALSE
782	PF3D7_0629900.iso1.exon1.amp1_3279	-1.215748237	-1.171657732	0.107522297	0.044090504	0.821818732	0.999821727	FALSE
783	PF3D7_0630300.iso1.exon2.amp3_4257	-0.416123858	-0.368218068	0.186430874	0.04790579	0.698172049	0.999821727	FALSE
784	PF3D7_0630600.2o2_8237	1.771000179	1.843620934	0.224745816	0.072620755	0.641689643	0.999821727	FALSE
785	PF3D7_0631000.iso1.exon1.amp1_2426	-0.640773006	-0.448218546	1.854319714	0.192554459	0.014302173	0.999821727	FALSE
786	PF3D7_0631100.iso1.exon2.amp1_1011	0.288308616	0.412093831	0.316109276	0.123785215	0.518666563	0.999821727	FALSE
787	PF3D7_0631400.iso1.exon1.amp1_1562	0.523093801	0.613789989	0.080991013	0.090696189	0.865094102	0.999821727	FALSE
788	PF3D7_0631800.iso1.exon2.amp1_3318	0.625369108	0.688788636	0.073207355	0.063419529	0.877908139	0.999821727	FALSE
789	PF3D7_0631900.iso1.exon2.amp1_3298	0.681519626	0.812040656	0.126343767	0.130521031	0.791565985	0.999821727	FALSE
790	PF3D7_0632000.iso1.exon2.amp1_3020	0.613825019	0.58488545	0.181629437	-0.028939569	0.705431413	0.999821727	FALSE
791	PF3D7_0632100.iso1.exon1.amp1_705	-0.063635178	0.004714449	0.145862851	0.068349628	0.760654738	0.999821727	FALSE
792	PF3D7_0632200.iso1.exon1.amp1_3015	1.486799481	1.74747991	0.760954521	0.260680429	0.164057454	0.999821727	FALSE
793	PF3D7_0632300.iso1.exon2.amp1_423	0.47296134	0.660253328	0.169646074	0.187291988	0.72371383	0.999821727	FALSE
794	PF3D7_0632400.iso1.exon2.amp1_3304	0.989318119	1.026963105	0.049783503	0.037644986	0.916725371	0.999821727	FALSE
795	PF3D7_0632500.iso1.exon1.amp1_3326	2.150497306	2.225671637	0.348105603	0.075174331	0.479815753	0.999821727	FALSE
796	PF3D7_0632500.iso1.exon2.amp1_1064	-0.512458799	-0.495132403	0.072239803	0.017326396	0.879504262	0.999821727	FALSE
797	PF3D7_0632500.iso1.exon2.amp3_492	-0.501835177	-0.367156429	0.157056999	0.134678748	0.743163094	0.999821727	FALSE
798	PF3D7_0632500.iso1.exon2.amp4_seg2_4605	-0.696856053	-0.574902998	0.483517706	0.121953055	0.340447085	0.999821727	FALSE
799	PF3D7_0632700.iso1.exon2.amp1_2437	1.005117548	1.245366636	0.333133849	0.240249088	0.497712615	0.999821727	FALSE
800	PF3D7_0632800.iso1.exon1.amp1_4482	0.347534475	0.45903487	0.340446825	0.111500395	0.488908631	0.999821727	FALSE
801	PF3D7_0700100.iso1.exon3.amp1_1301	2.147062138	2.26699396	0.779217005	0.119931822	0.156401996	0.999821727	FALSE
802	PF3D7_0700200.iso1.exon3.amp1_994	0.221034521	0.160647833	0.290310752	-0.060386687	0.551628496	0.999821727	FALSE
803	PF3D7_0700300.iso1.exon3.amp1_3589	-0.361296802	-0.324552031	0.062866507	0.036744771	0.895001466	0.999821727	FALSE
804	PF3D7_0700400.iso1.exon3.amp1_4165	1.347461946	1.432957824	0.134014697	0.085495877	0.779358408	0.999821727	FALSE
805	PF3D7_0700500.iso1.exon3.amp1_2741	0.837534745	0.921558626	0.273127846	0.084023881	0.574375949	0.999821727	FALSE
806	PF3D7_0701000.1o1_5806	2.3020749	2.391649459	0.144865067	0.089574559	0.762222489	0.999821727	FALSE
807	PF3D7_0701100.iso1.exon3.amp1_2151	1.204517336	1.428705325	0.325181657	0.224187989	0.507420624	0.999821727	FALSE
808	PF3D7_0701600.iso1.exon2.amp1_4435	0.352615377	0.423720164	0.244324418	0.071104787	0.613885673	0.999821727	FALSE
809	PF3D7_0701800.iso1.exon1.amp1_3301	0.318861015	0.351647615	0.077645094	0.032786599	0.870596543	0.999821727	FALSE
810	PF3D7_0701900.e2s1_9111	0.040176384	0.181546337	0.97783976	0.141369953	0.094057239	0.999821727	FALSE
811	PF3D7_0702200.1o1_5873	-0.032935292	0.077448557	0.249950723	0.110383849	0.606035344	0.999821727	FALSE
812	PF3D7_0702300.2o2_7331	0.497905386	0.419915772	0.115766033	-0.077989614	0.808517935	0.999821727	FALSE
813	PF3D7_0702300.e2_6828	-0.756212635	-0.755909376	0.001201511	0.000303258	0.997985008	0.999821727	FALSE
814	PF3D7_0702400.e1s1_8040	0.437513637	0.410184729	0.01590398	-0.027328908	0.97333524	0.999821727	FALSE
815	PF3D7_0702500.e1s1_8598	-0.622104805	-0.753245835	0.856128666	-0.13114103	0.128100529	0.999821727	FALSE
816	PF3D7_0702600.iso1.exon1.amp1_3842	-0.330288631	-0.428499212	0.120844676	-0.098210581	0.800362248	0.999821727	FALSE
817	PF3D7_0703100.1o1_5246	0.384245859	0.426293416	0.035299136	0.042047558	0.940878259	0.999821727	FALSE
818	PF3D7_0703200.iso1.exon1.amp1_4307	-0.353732021	-0.340699625	0.01944575	0.013032396	0.967401324	0.999821727	FALSE
819	PF3D7_0703300.iso1.exon1.amp1_3572	-0.72143555	-0.655839757	0.666401558	0.065595793	0.210442753	0.999821727	FALSE
820	PF3D7_0703500.e2s2_7503	1.93191265	1.976309936	0.087461901	0.044397286	0.854479095	0.999821727	FALSE
821	PF3D7_0703700.e1s1_8629	0.867128518	0.636528815	0.12111104	-0.230599703	0.799935336	0.999821727	FALSE
822	PF3D7_0704000.iso1.exon1.amp1_seg1_3736	-0.499877859	-0.424366481	0.157212143	0.075511378	0.74292195	0.999821727	FALSE
823	PF3D7_0704200.iso1.exon1.amp1_252	-0.296381481	-0.284857149	0.016741774	0.011524331	0.971931387	0.999821727	FALSE
824	PF3D7_0704200.iso1.exon1.amp2_769	0.185941609	0.166797844	0.018641759	-0.019143766	0.968748131	0.999821727	FALSE
825	PF3D7_0704300.s1_6860	-0.519807046	-0.537911434	0.133928229	-0.018104388	0.779495595	0.999821727	FALSE
826	PF3D7_0704500.iso1.exon1.amp2_178	-0.191485615	-0.128390686	0.23209272	0.063094929	0.631168816	0.999821727	FALSE
827	PF3D7_0704600.iso1.exon5.amp3_seg1_283	0.103855993	0.159081654	0.14498817	0.055225662	0.76202899	0.999821727	FALSE
828	PF3D7_0704800.iso1.exon1.amp1_3430	0.142212328	0.329442223	0.121834535	0.187229894	0.79877619	0.999821727	FALSE
829	PF3D7_0704800.iso1.exon1.amp2_1629	0.934028058	0.857227454	0.061017679	-0.076800604	0.898065175	0.999821727	FALSE
830	PF3D7_0704900.iso1.exon1.amp1_3311	-0.413968131	-0.45718957	0.070381947	-0.043221439	0.88257101	0.999821727	FALSE
831	PF3D7_0705000.e1s1_7991	-0.306205571	-0.238238682	0.245814928	0.06796689	0.611799813	0.999821727	FALSE
832	PF3D7_0705000.e1s2_6251	-0.122719874	-0.108717217	0.038065507	0.014002658	0.936258375	0.999821727	FALSE
833	PF3D7_0705500.iso1.exon2.amp2_3383	0.944040195	1.028969883	0.308629854	0.084929688	0.528073784	0.999821727	FALSE
834	PF3D7_0705500.iso1.exon2.amp3_1354	-0.013573774	-0.003012896	0.101848248	0.010560877	0.831016105	0.999821727	FALSE
835	PF3D7_0705600.iso1.exon1.amp2_4245	0.414312661	0.261686694	0.084113225	-0.152625967	0.859967873	0.999821727	FALSE
836	PF3D7_0706500.iso1.exon1.amp1_3144	-1.013652108	-1.013210705	0.001921393	0.000441403	0.996777739	0.999821727	FALSE
837	PF3D7_0706700.1o1_8234	-0.197030248	-0.138809152	0.136640847	0.058221096	0.775196518	0.999821727	FALSE
838	PF3D7_0707200.iso1.exon1.amp1_1982	-0.351988084	-0.262826075	0.349351655	0.089162009	0.478348729	0.999821727	FALSE
839	PF3D7_0707300.2o5_6209	-0.770949839	-0.819134039	0.370709286	-0.0481842	0.453741804	0.999821727	FALSE
840	PF3D7_0707400.iso1.exon1.amp1_1310	1.279660588	1.630603081	0.200909192	0.350942493	0.676519886	0.999821727	FALSE
841	PF3D7_0707500.iso1.exon1.amp2_467	-0.536798997	-0.434191939	0.387285509	0.102607059	0.43534494	0.999821727	FALSE
842	PF3D7_0707700.1o1_5353	0.260506424	0.210419363	0.101855114	-0.050087061	0.831004956	0.999821727	FALSE
843	PF3D7_0708000.e1s1_9235	-0.718620702	-0.684884819	0.07333652	0.033735883	0.877695115	0.999821727	FALSE
844	PF3D7_0708000.e2s1_8905	-0.692705375	-0.657282562	0.216881602	0.035422813	0.65306492	0.999821727	FALSE
845	PF3D7_0708400.e1_5679	-0.208451367	-0.111636575	0.364445414	0.096814792	0.460853183	0.999821727	FALSE
846	PF3D7_0708400.e2_6536	-0.867558677	-0.786243195	0.972134133	0.081315482	0.095408105	0.999821727	FALSE
847	PF3D7_0709000.e3s1_5972	-0.895472119	-0.865755688	0.16797851	0.029716432	0.726276104	0.999821727	FALSE
848	PF3D7_0709100.e1s1_4890	-0.610558249	-0.368300697	0.40956478	0.242257552	0.411580664	0.999821727	FALSE
849	PF3D7_0709300.iso1.exon1.amp3_2493	-0.103146193	-0.090153718	0.013605141	0.012992474	0.977187883	0.999821727	FALSE
850	PF3D7_0709400.iso1.exon2.amp1_2171	1.167632825	1.063449785	0.089973203	-0.10418304	0.850369351	0.999821727	FALSE
851	PF3D7_0709700.e1s1_7479	0.004270441	-0.082948663	0.111429711	-0.087219104	0.815504956	0.999821727	FALSE
852	PF3D7_0709900.3o3_8531	-0.653309844	-0.668284686	0.108670403	-0.014974842	0.819961849	0.999821727	FALSE
853	PF3D7_0709900.e1s2_8563	-0.518646341	-0.487213466	0.074901734	0.031432875	0.8751147	0.999821727	FALSE
854	PF3D7_0709900.e2_7429	0.700922326	0.808339289	0.112508667	0.107416963	0.813764485	0.999821727	FALSE
855	PF3D7_0709900.e3_5674	-0.2743351	-0.29207059	0.084787169	-0.01773549	0.858862438	0.999821727	FALSE
856	PF3D7_0710200.iso1.exon1.amp2_seg1_3742	-0.886166359	-0.915032435	0.102514088	-0.028866076	0.829935075	0.999821727	FALSE
857	PF3D7_0710200.iso1.exon1.amp3_3649	0.237730931	0.442925066	0.127322368	0.205194135	0.790004507	0.999821727	FALSE
858	PF3D7_0710300.iso1.exon2.amp1_2630	-1.084165718	-1.028735062	0.386114036	0.055430656	0.436624982	0.999821727	FALSE
859	PF3D7_0710400_9160	0.213974972	0.342853235	0.453937006	0.128878263	0.367494912	0.999821727	FALSE
860	PF3D7_0710500.iso1.exon5.amp1_1229	-0.573059237	-0.502145301	0.282373379	0.070913937	0.562058498	0.999821727	FALSE
861	PF3D7_0711000.e1s1_7491	-0.657024503	-0.58743694	0.140899487	0.069587563	0.768466908	0.999821727	FALSE
862	PF3D7_0711000.e1s2_8942	-0.859044059	-0.805765693	0.043231425	0.053278366	0.927639498	0.999821727	FALSE
863	PF3D7_0711100.iso1.exon1.amp1_1552	0.084933027	0.011114043	0.139343045	-0.073818985	0.770923619	0.999821727	FALSE
864	PF3D7_0711200.iso1.exon1.amp1_2331	-0.526660763	-0.526453421	0.001004924	0.000207342	0.998314693	0.999821727	FALSE
865	PF3D7_0711300.iso1.exon1.amp1_3846	-0.320507392	-0.288109771	0.165635674	0.032397621	0.729883276	0.999821727	FALSE
866	PF3D7_0711700.e2s1_5452	2.558472587	2.64361069	0.424628135	0.085138103	0.396133993	0.999821727	FALSE
867	PF3D7_0712000.iso1.exon1.amp1_145	2.113357553	2.275211817	0.623668858	0.161854264	0.235609332	0.999821727	FALSE
868	PF3D7_0712300.iso1.exon1.amp1_3615	1.345664326	1.44971721	0.274401349	0.104052885	0.572668622	0.999821727	FALSE
869	PF3D7_0712400.iso1.exon1.amp1_1004	0.836889943	0.831152812	0.010968515	-0.005737131	0.981607545	0.999821727	FALSE
870	PF3D7_0712400.iso1.exon2.amp2_2529	0.853424124	0.925445382	0.053208839	0.072021258	0.911028254	0.999821727	FALSE
871	PF3D7_0712600.iso1.exon1.amp1_434	1.866562929	2.024418733	1.206507419	0.157855804	0.054215935	0.999821727	FALSE
872	PF3D7_0712800.iso1.exon1.amp1_3904	1.734816849	1.800761837	0.229728587	0.065944988	0.634542957	0.999821727	FALSE
873	PF3D7_0712800.iso1.exon2.amp2_1944	-0.630177249	-0.636293833	0.01103628	-0.006116584	0.981493943	0.999821727	FALSE
874	PF3D7_0712900.iso1.exon1.amp1_3316	1.821366994	1.985906775	0.240304525	0.164539781	0.61953323	0.999821727	FALSE
875	PF3D7_0712900.iso1.exon2.amp2_215	-0.630904534	-0.618138577	0.02814515	0.012765958	0.952838056	0.999821727	FALSE
876	PF3D7_0713000.iso1.exon2.amp1_2451	-0.435396064	-0.301096979	0.319797858	0.134299085	0.514072419	0.999821727	FALSE
877	PF3D7_0713100.2o2_5537	-0.364054667	-0.472163717	0.352804985	-0.108109051	0.474301069	0.999821727	FALSE
878	PF3D7_0713600.iso1.exon1.amp1_3623	-0.116106621	0.013154403	0.128825302	0.129261024	0.787608712	0.999821727	FALSE
879	PF3D7_0713900.e1s1_5647	-0.786156131	-0.915755589	0.365780574	-0.129599458	0.459330033	0.999821727	FALSE
880	PF3D7_0713900.e1s3_8249	0.074328573	0.162552616	0.258799105	0.088224044	0.593818494	0.999821727	FALSE
881	PF3D7_0713900.e1s4_5937	0.716020008	0.83191569	0.134479514	0.115895682	0.778621115	0.999821727	FALSE
882	PF3D7_0714000.e1s1_6579	-0.672627036	-0.660954426	0.103693782	0.01167261	0.828020893	0.999821727	FALSE
883	PF3D7_0714200.iso1.exon1.amp2_463	-0.283646281	-0.303905284	0.048507076	-0.020259003	0.918849931	0.999821727	FALSE
884	PF3D7_0715000.1o1_5833	-0.461709313	-0.417351873	0.315659059	0.044357439	0.519229356	0.999821727	FALSE
885	PF3D7_0715300.1o3_4714	-0.424679399	-0.442756726	0.084908846	-0.018077327	0.858662899	0.999821727	FALSE
886	PF3D7_0715600.1o1_6202	-0.972507233	-0.896906454	0.12310761	0.075600779	0.796738058	0.999821727	FALSE
887	PF3D7_0715800.1o1_6729	-0.428369448	0.000240925	0.511631977	0.428610373	0.316415967	0.999821727	FALSE
888	PF3D7_0716200.1o1_8223	-0.441669288	-0.440120218	0.00140975	0.00154907	0.997635783	0.999821727	FALSE
889	PF3D7_0716300.e1s1_8921	1.46659487	1.688446167	0.292242073	0.221851297	0.549111043	0.999821727	FALSE
890	PF3D7_0717000.iso1.exon2.amp1_1484	-0.87608107	-0.931747491	0.252634129	-0.05566642	0.602313619	0.999821727	FALSE
891	PF3D7_0717200.1o2_8169	-0.290391393	-0.378099602	0.250157961	-0.087708209	0.605747399	0.999821727	FALSE
892	PF3D7_0717300.1o4_7894	-0.681512848	-0.653257834	0.064864852	0.028255014	0.891692482	0.999821727	FALSE
893	PF3D7_0717500.e1s1_5155	0.531631172	0.582484323	0.036885869	0.050853151	0.938228032	0.999821727	FALSE
894	PF3D7_0717700.e1s1_9221	-0.560735799	-0.508993577	0.158319394	0.051742222	0.741201955	0.999821727	FALSE
895	PF3D7_0718000.e11s1_8030	-1.044115776	-0.972692247	0.44936092	0.071423529	0.371844481	0.999821727	FALSE
896	PF3D7_0718000.e4s1_4866	-0.338781976	-0.148031955	0.329457639	0.190750022	0.502183134	0.999821727	FALSE
897	PF3D7_0718000.e5s1_8036	-0.731865218	-0.613003922	0.85240532	0.118861296	0.129335451	0.999821727	FALSE
898	PF3D7_0718000.e9s3_8251	-1.263780406	-1.243255457	0.076247121	0.020524949	0.872898192	0.999821727	FALSE
899	PF3D7_0718000.e9s4_5939	-0.433800846	-0.360126489	0.148778815	0.073674358	0.756081067	0.999821727	FALSE
900	PF3D7_0718100.iso1.exon1.amp2_1370	0.08080218	0.047229896	0.129198434	-0.033572284	0.787014348	0.999821727	FALSE
901	PF3D7_0718300.e5s1_8050	-0.21216503	-0.119394662	0.071768954	0.092770369	0.880281249	0.999821727	FALSE
902	PF3D7_0718300.e7s1_4783	0.086516631	0.104318823	0.038487361	0.017802193	0.935554133	0.999821727	FALSE
903	PF3D7_0718600.iso1.exon6.amp1_3617	0.208722411	0.33138692	0.168745114	0.122664509	0.725097648	0.999821727	FALSE
904	PF3D7_0718600.iso1.exon8.amp1_4159	-0.137247758	-0.0977316	0.03376806	0.039516158	0.943436407	0.999821727	FALSE
905	PF3D7_0718800.iso1.exon4.amp1_3221	-0.838639744	-0.855755429	0.131563658	-0.017115685	0.783250875	0.999821727	FALSE
906	PF3D7_0719000.1o1_5524	0.415013637	0.554109589	0.080465391	0.139095952	0.865957897	0.999821727	FALSE
907	PF3D7_0719100.iso1.exon2.amp1_947	0.178914218	0.215746485	0.02494484	0.036832266	0.958193326	0.999821727	FALSE
908	PF3D7_0719200.e1s1_7415	-0.765502117	-0.822953232	0.228831366	-0.057451116	0.635826311	0.999821727	FALSE
909	PF3D7_0719200.e9s1_8565	-0.08322615	-0.10415555	0.049921359	-0.0209294	0.916495965	0.999821727	FALSE
910	PF3D7_0719400.s1_5695	-1.068528474	-1.057767712	0.019011164	0.010760762	0.968129307	0.999821727	FALSE
911	PF3D7_0719500.1o2_8186	0.043967345	0.080795271	0.096041235	0.036827925	0.840463008	0.999821727	FALSE
912	PF3D7_0719500.2o2_9047	-0.750150257	-0.65912182	0.514210207	0.091028437	0.31429189	0.999821727	FALSE
913	PF3D7_0719600.e2_5954	-0.518452237	-0.506031238	0.062777506	0.012420999	0.8951489	0.999821727	FALSE
914	PF3D7_0719700 (renamed)_9040	1.851383072	1.94050984	0.092404311	0.089126767	0.846396312	0.999821727	FALSE
915	PF3D7_0719700.e3s1_7128	-0.538290875	-0.582753361	0.417504599	-0.044462486	0.403376716	0.999821727	FALSE
916	PF3D7_0721000.iso1.exon1.amp1_1958	-0.29397015	-0.472353077	0.083271904	-0.178382926	0.861348395	0.999821727	FALSE
917	PF3D7_0721000.iso1.exon1.amp2_2247	-0.268810936	-0.469750781	0.111320995	-0.200939845	0.815680398	0.999821727	FALSE
918	PF3D7_0721100_5690	-0.374603188	-0.204808946	0.224939322	0.169794242	0.641411215	0.999821727	FALSE
919	PF3D7_0721600.e2s1_4856	-0.478091036	-0.355231459	0.231793439	0.122859578	0.631595358	0.999821727	FALSE
920	PF3D7_0721700_4819	0.458493445	0.648171521	0.623743337	0.189678076	0.235562951	0.999821727	FALSE
921	PF3D7_0722600.e1s1_6051	-0.561609174	-0.45670783	0.274460186	0.104901344	0.572589824	0.999821727	FALSE
922	PF3D7_0722800.1o1_5891	0.921898889	1.29293122	0.325101431	0.371032331	0.507519276	0.999821727	FALSE
923	PF3D7_0723000.iso1.exon1.amp1_3306	-0.322442468	-0.242345844	0.151516065	0.080096624	0.75179867	0.999821727	FALSE
924	PF3D7_0723200.e4s1_7754	-0.86758784	-0.769897018	0.510737098	0.097690822	0.317156306	0.999821727	FALSE
925	PF3D7_0723400.e1s2_6637	-0.217291308	-0.122904331	0.377509075	0.094386977	0.446121082	0.999821727	FALSE
926	PF3D7_0723500_4823	-0.907716882	-0.736003701	0.346138027	0.171713182	0.482139297	0.999821727	FALSE
927	PF3D7_0723700.iso1.exon1.amp2_1934	-0.958982066	-0.924672327	0.212064781	0.034309739	0.660089266	0.999821727	FALSE
928	PF3D7_0723800.iso1.exon1.amp3_2230	-0.630038952	-0.80838038	0.176353407	-0.178341428	0.713452228	0.999821727	FALSE
929	PF3D7_0723800.iso1.exon2.amp1_2646	0.166841522	0.142714076	0.086511337	-0.024127446	0.856036159	0.999821727	FALSE
930	PF3D7_0723900.e1s2_5176	0.191965665	0.405450666	0.164354138	0.213485001	0.731859995	0.999821727	FALSE
931	PF3D7_0724300.iso1.exon1.amp1_112	-0.227166024	-0.136152631	0.196453716	0.091013393	0.683144269	0.999821727	FALSE
932	PF3D7_0724400.iso1.exon1.amp1_2105	-0.807356755	-0.86013567	0.696666506	-0.052778915	0.194279574	0.999821727	FALSE
933	PF3D7_0724700.e2s2_8380	-0.458712006	-0.441252927	0.046209851	0.017459079	0.922675619	0.999821727	FALSE
934	PF3D7_0725100.e1s1_5471	-0.54110893	-0.558373448	0.039631032	-0.017264518	0.933645254	0.999821727	FALSE
935	PF3D7_0725200.iso1.exon3.amp1_3844	-0.547387482	-0.533255285	0.152860683	0.014132197	0.749698969	0.999821727	FALSE
936	PF3D7_0726100.2o2_6782	-0.456465881	-0.378418245	0.234336438	0.078047636	0.627976541	0.999821727	FALSE
937	PF3D7_0726200.iso1.exon2.amp1_1023	-0.303498367	-0.215190627	0.152573928	0.08830774	0.750146535	0.999821727	FALSE
938	PF3D7_0726400.e1s1_6882	-0.628524339	-0.63796287	0.187892253	-0.009438531	0.695970241	0.999821727	FALSE
939	PF3D7_0726400.e1s3_8538	-0.701960447	-0.661757624	0.087794084	0.040202823	0.853935154	0.999821727	FALSE
940	PF3D7_0726400.e2s1_8610	-0.811700276	-0.797910546	0.059278822	0.01378973	0.900948616	0.999821727	FALSE
941	PF3D7_0726400.e2s2_9247	-0.625485397	-0.641801301	0.044137942	-0.016315904	0.926128252	0.999821727	FALSE
942	PF3D7_0726400.e3s1_8933	-0.750094907	-0.655186307	0.344435126	0.0949086	0.484157238	0.999821727	FALSE
943	PF3D7_0726400.e6s1_8651	-1.240679629	-1.193046473	0.248342604	0.047633155	0.608272663	0.999821727	FALSE
944	PF3D7_0726400.e6s2_4899	0.830067798	1.170571312	0.497745668	0.340503514	0.32808503	0.999821727	FALSE
945	PF3D7_0726500.iso1.exon4.amp1_3386	-0.049871695	-0.035854002	0.078500174	0.014017693	0.869189486	0.999821727	FALSE
946	PF3D7_0726500.iso1.exon4.amp2_2525	-0.62516284	-0.511503771	0.47260615	0.113659069	0.350210626	0.999821727	FALSE
947	PF3D7_0726600.1o2_6479	-0.392007872	-0.515757674	0.296183979	-0.123749802	0.543997698	0.999821727	FALSE
948	PF3D7_0727000.iso1.exon1.amp1_1996	-0.738945409	-0.675925122	0.420956805	0.063020286	0.399852869	0.999821727	FALSE
949	PF3D7_0727200.1o1_6756	0.05141806	0.248865586	0.587686244	0.197447526	0.259103022	0.999821727	FALSE
950	PF3D7_0727800.iso1.exon1.amp1_4594	-0.327627129	-0.289995335	0.053622742	0.037631794	0.910340269	0.999821727	FALSE
951	PF3D7_0727900.e1s2_5080	-0.432675461	-0.341557512	0.355813958	0.09111795	0.470795916	0.999821727	FALSE
952	PF3D7_0728000.e2_6530	-1.122639032	-1.070697698	0.18936223	0.051941334	0.693759127	0.999821727	FALSE
953	PF3D7_0728200.2o2_7918	-0.202768913	0.003687289	0.121187904	0.206456203	0.799812159	0.999821727	FALSE
954	PF3D7_0728300.iso1.exon1.amp1_984	-0.65090008	-0.687782068	0.250273016	-0.036881988	0.605587575	0.999821727	FALSE
955	PF3D7_0728600.iso1.exon1.amp1_205	-0.731154706	-0.674773786	0.488047584	0.05638092	0.336466238	0.999821727	FALSE
956	PF3D7_0728600.iso1.exon3.amp1_2396	0.318762135	0.570697453	1.561735214	0.251935318	0.025073992	0.999821727	FALSE
957	PF3D7_0728700.iso1.exon3.amp1_1258	-0.224999204	-0.203145608	0.073102877	0.021853596	0.878080457	0.999821727	FALSE
958	PF3D7_0728800.iso1.exon1.amp1_4481	-0.006325155	0.037171344	0.030174884	0.043496499	0.94944312	0.999821727	FALSE
959	PF3D7_0729500.iso1.exon1.amp1_1884	-0.278304794	-0.265139922	0.02367139	0.013164871	0.960325026	0.999821727	FALSE
960	PF3D7_0729700.iso1.exon2.amp1_1872	0.183855994	0.116049169	0.291027578	-0.067806825	0.550693188	0.999821727	FALSE
961	PF3D7_0729800.iso1.exon1.amp1_365	-0.495807118	-0.530287751	0.294169572	-0.034480632	0.54660656	0.999821727	FALSE
962	PF3D7_0729900.e1s1_5072	-0.659293187	-0.490291558	0.345069798	0.169001629	0.483404397	0.999821727	FALSE
963	PF3D7_0730000.iso1.exon1.amp1_348	-0.449489228	-0.466185305	0.058027968	-0.016696077	0.903023978	0.999821727	FALSE
964	PF3D7_0730300.e1s1_5186	-0.753230098	-0.802425361	0.248619169	-0.049195263	0.607887518	0.999821727	FALSE
965	PF3D7_0730300.e1s2_5758	-0.186659081	-0.292923558	0.152999881	-0.106264477	0.749481752	0.999821727	FALSE
966	PF3D7_0730500.e1s3_7387	-0.264289672	-0.288156927	0.039800653	-0.023867255	0.933362187	0.999821727	FALSE
967	PF3D7_0730800.1.e2s1_5161	-0.381445848	-0.458595079	0.057136088	-0.077149231	0.904504319	0.999821727	FALSE
968	PF3D7_0730800.iso2.exon2.amp1_1557	-0.722214364	-0.582568135	0.116342785	0.139646229	0.807590233	0.999821727	FALSE
969	PF3D7_0730900.e1s1_8316	-0.353804803	-0.483846372	0.348679263	-0.130041569	0.479139932	0.999821727	FALSE
970	PF3D7_0730900.e2s1_8659	-0.023256981	-0.036867263	0.065729911	-0.013610282	0.890260886	0.999821727	FALSE
971	PF3D7_0731100.2o2_6789	0.871501247	0.915281168	0.077598563	0.043779921	0.870673129	0.999821727	FALSE
972	PF3D7_0731200.2o2_8439	0.661794877	0.680346084	0.011489593	0.018551207	0.980734016	0.999821727	FALSE
973	PF3D7_0731500.s1 (renamed)_7684	-0.576165194	-0.491366005	0.160652909	0.084799189	0.737583085	0.999821727	FALSE
974	PF3D7_0731500.s2 (renamed)_7112	0.219317004	0.211807258	0.005507246	-0.007509746	0.990764359	0.999821727	FALSE
975	PF3D7_0731600.e1s1_6357	-0.031737819	0.116575996	0.09635219	0.148313815	0.839956301	0.999821727	FALSE
976	PF3D7_0732000.iso1.exon2.amp1_690	1.473390873	1.571554353	0.149221982	0.09816348	0.755387013	0.999821727	FALSE
977	PF3D7_0732200.iso1.exon2.amp1_1297	1.335597542	1.542175029	0.441047877	0.206577487	0.379860933	0.999821727	FALSE
978	PF3D7_0732300.iso1.exon1.amp1_4175	-0.930923858	-0.911843893	0.087594413	0.019079965	0.854262099	0.999821727	FALSE
979	PF3D7_0732400.iso1.exon1.amp1_2443	-0.351538572	-0.336203749	0.025715025	0.015334824	0.956904271	0.999821727	FALSE
980	PF3D7_0732500.iso1.exon1.amp1_135	-0.440522672	-0.287897601	0.146781015	0.152625071	0.759213316	0.999821727	FALSE
981	PF3D7_0732700.iso1.exon2.amp1_712	1.866829766	2.028226323	0.130373302	0.161396557	0.785144047	0.999821727	FALSE
982	PF3D7_0732900.iso1.exon2.amp1_996	0.43864474	0.515477579	0.093580171	0.076832839	0.844476634	0.999821727	FALSE
983	PF3D7_0733000.iso1.exon1.amp1_3621	1.747182212	1.865924151	0.742144202	0.118741939	0.172356311	0.999821727	FALSE
984	PF3D7_0733000.iso1.exon2.amp3_1942	-0.132787369	-0.171416261	0.04968701	-0.038628892	0.916885949	0.999821727	FALSE
985	PF3D7_0800100.iso1.exon1.amp1_723	1.720489633	1.85311368	0.830661958	0.132624047	0.136809066	0.999821727	FALSE
986	PF3D7_0800100.iso1.exon2.amp1_3980	-0.702792648	-0.670128002	0.163418886	0.032664646	0.733304175	0.999821727	FALSE
987	PF3D7_0800100.iso1.exon2.amp2_4269	-0.724690644	-0.746518051	0.03492228	-0.021827407	0.941507838	0.999821727	FALSE
988	PF3D7_0800200.e1s1_8827	-0.533964144	-0.409875556	0.143820413	0.124088588	0.763865361	0.999821727	FALSE
989	PF3D7_0800200.e1s2_5359	-0.81344283	-0.725430742	0.154650511	0.088012088	0.746908112	0.999821727	FALSE
990	PF3D7_0800200.e2s1_5745	2.131775287	2.304832805	0.512020295	0.173057518	0.316095206	0.999821727	FALSE
991	PF3D7_0800300.e1s3_8831	-0.844875399	-0.912200895	0.191917412	-0.067325496	0.689924432	0.999821727	FALSE
992	PF3D7_0800300.e2s1_8914	3.144355144	3.25619301	1.156501856	0.111837866	0.060939308	0.999821727	FALSE
993	PF3D7_0800400.iso1.exon3.amp1_128	0.112739502	0.229118384	0.220629556	0.116378882	0.64762914	0.999821727	FALSE
994	PF3D7_0800500.iso1.exon2.amp1_3888	0.267983235	0.27835688	0.013347496	0.010373645	0.977619722	0.999821727	FALSE
995	PF3D7_0800700.e1s1_6606	-0.178621099	-0.14193133	0.223936647	0.036689769	0.642854687	0.999821727	FALSE
996	PF3D7_0800700.e3s1_5772	-0.062282911	0.00351064	0.116028859	0.065793552	0.808095133	0.999821727	FALSE
997	PF3D7_0801000.e2s1_5460	0.505489083	0.470993505	0.048517289	-0.034495578	0.918832928	0.999821727	FALSE
998	PF3D7_0801000.e2s2_6911	1.273883144	1.273123379	0.006298695	-0.000759765	0.989437203	0.999821727	FALSE
999	PF3D7_0801600.1o1_8124	-0.670051891	-0.689423203	0.066613471	-0.019371312	0.888799193	0.999821727	FALSE
1000	PF3D7_0801700.1o3_5645	-0.360748664	-0.352474749	0.011802318	0.008273916	0.980209782	0.999821727	FALSE
1001	PF3D7_0801800_4835	-0.600648181	-0.645546182	0.103465699	-0.044898	0.828390871	0.999821727	FALSE
1002	PF3D7_0801900.iso1.exon1.amp5_1622	-0.868337387	-0.863556259	0.043884331	0.004781128	0.926551008	0.999821727	FALSE
1003	PF3D7_0802000.e1s1_5197	-0.068398837	0.110940485	0.177043677	0.179339322	0.712400272	0.999821727	FALSE
1004	PF3D7_0802000.e1s2_6642	-0.247638255	-0.209270478	0.051186733	0.038367777	0.914390722	0.999821727	FALSE
1005	PF3D7_0802300.iso1.exon1.amp1_1413	-0.238978094	-0.079456826	0.213424427	0.159521268	0.658102161	0.999821727	FALSE
1006	PF3D7_0802300.iso1.exon1.amp2_1927	-0.670691274	-0.418616824	0.601319408	0.252074449	0.249942862	0.999821727	FALSE
1007	PF3D7_0802600.iso1.exon3.amp1_1656	-0.461078389	-0.511509074	0.064450715	-0.050430684	0.89237802	0.999821727	FALSE
1008	PF3D7_0802600.iso1.exon6.amp1_2681	-0.501163226	-0.480402136	0.112147386	0.02076109	0.814347126	0.999821727	FALSE
1009	PF3D7_0802800.2o2_8482	-0.603759888	-0.602724266	0.001373565	0.001035621	0.997696467	0.999821727	FALSE
1010	PF3D7_0803200.iso1.exon1.amp1_3327	-0.577478244	-0.643863474	0.134978586	-0.06638523	0.7778298	0.999821727	FALSE
1011	PF3D7_0803400.iso1.exon1.amp1_4581	1.211662466	1.10360628	0.066018852	-0.108056186	0.889782826	0.999821727	FALSE
1012	PF3D7_0803400.iso1.exon1.amp2_3948	1.184126478	1.220653339	0.121686648	0.036526861	0.799013075	0.999821727	FALSE
1013	PF3D7_0804000.iso1.exon1.amp1_4456	0.158934162	0.307292322	0.251256381	0.148358159	0.604222658	0.999821727	FALSE
1014	PF3D7_0804000.iso1.exon2.amp1_3276	-0.376181149	-0.348808323	0.246515777	0.027372826	0.610820558	0.999821727	FALSE
1015	PF3D7_0804500.e1s1_5404	-0.723012188	-0.61995273	0.174282227	0.103059458	0.716613273	0.999821727	FALSE
1016	PF3D7_0804500.e2s2_5372	-0.115224278	-0.04347417	0.170665868	0.071750107	0.722149031	0.999821727	FALSE
1017	PF3D7_0804500.e2s3_4800	-0.373436779	-0.402838203	0.200662317	-0.029401424	0.676886023	0.999821727	FALSE
1018	PF3D7_0804500.e3_7398	-0.19083655	-0.163001164	0.070370135	0.027835386	0.882590517	0.999821727	FALSE
1019	PF3D7_0804600.1o1_6746	-0.745232128	-0.836922178	0.114282075	-0.09169005	0.810906617	0.999821727	FALSE
1020	PF3D7_0804800.e1s1_5442	-0.533865858	-0.591270121	0.308534161	-0.057404263	0.528194935	0.999821727	FALSE
1021	PF3D7_0804900.1o1_6159	-0.280803369	-0.408311899	0.416267867	-0.12750853	0.404645474	0.999821727	FALSE
1022	PF3D7_0805100.iso1.exon1.amp1_3626	-0.339501723	-0.357942569	0.118093676	-0.018440846	0.804776287	0.999821727	FALSE
1023	PF3D7_0805300.iso1.exon1.amp2_1057	-0.481109716	-0.574238613	0.122896316	-0.093128897	0.797076195	0.999821727	FALSE
1024	PF3D7_0805400.1o6_8716	-0.56060708	-0.485416427	0.113333697	0.075190653	0.8124345	0.999821727	FALSE
1025	PF3D7_0805700.iso1.exon1.amp2_3399	-0.625085242	-0.531374963	0.610103667	0.09371028	0.244209465	0.999821727	FALSE
1026	PF3D7_0806000.iso1.exon1.amp2_515	-0.487249017	-0.369663367	0.055901852	0.11758565	0.906553676	0.999821727	FALSE
1027	PF3D7_0806200.10o10_8244	-0.873202854	-0.680442268	0.348140737	0.192760586	0.479774341	0.999821727	FALSE
1028	PF3D7_0806300.iso1.exon1.amp1_485	-0.800290805	-0.723434804	0.361260023	0.076856	0.464503141	0.999821727	FALSE
1029	PF3D7_0806300.iso1.exon2.amp1_3830	-0.433142876	-0.368011093	0.281320729	0.065131783	0.563451791	0.999821727	FALSE
1030	PF3D7_0806500.e1s1_5475	-0.663241969	-0.793130149	0.151328399	-0.129888181	0.75209193	0.999821727	FALSE
1031	PF3D7_0806600.e2s1_5153	-0.549271054	-0.473818594	0.272468838	0.075452461	0.575260785	0.999821727	FALSE
1032	PF3D7_0806600.e3s1_8038	-0.509323906	-0.497070376	0.013510369	0.012253529	0.977346729	0.999821727	FALSE
1033	PF3D7_0806600.e5s1_5749	-0.190325198	-0.322636179	0.377761046	-0.132310981	0.445840672	0.999821727	FALSE
1034	PF3D7_0806700.iso1.exon1.amp1_1804	-0.72701193	-0.769374965	0.309934409	-0.042363035	0.526424174	0.999821727	FALSE
1035	PF3D7_0806700.iso1.exon3.amp3_1358	-0.878115255	-0.917417031	0.152632928	-0.039301776	0.750054438	0.999821727	FALSE
1036	PF3D7_0806800.e1s1_8932	0.095875301	0.408146089	0.287298659	0.312270789	0.55557067	0.999821727	FALSE
1037	PF3D7_0806900.iso1.exon1.amp1_704	-0.785065805	-0.567284427	0.456653378	0.217781378	0.364934142	0.999821727	FALSE
1038	PF3D7_0807100.iso1.exon1.amp2_3363	-0.296155279	-0.400544158	0.15606184	-0.104388879	0.744710743	0.999821727	FALSE
1039	PF3D7_0807700.1o5_5328	-0.800689496	-0.707720683	0.474311833	0.092968813	0.34866805	0.999821727	FALSE
1040	PF3D7_0807700.5o5_5617	-0.250042151	-0.068145038	0.219122561	0.181897113	0.649811624	0.999821727	FALSE
1041	PF3D7_0807800.e2s1_6602	0.244031385	0.207823026	0.054605519	-0.036208359	0.908707087	0.999821727	FALSE
1042	PF3D7_0808100.iso1.exon2.amp1_3829	-0.612289088	-0.629032087	0.070600965	-0.016742999	0.882209349	0.999821727	FALSE
1043	PF3D7_0808100.iso1.exon3.amp1_3963	-0.224516135	-0.160531361	0.32883561	0.063984773	0.502942522	0.999821727	FALSE
1044	PF3D7_0808200.e1s1_9217	0.554649835	0.606213303	0.099970801	0.051563468	0.834066676	0.999821727	FALSE
1045	PF3D7_0808400.1o1_4673	-0.628400839	-0.802731414	0.767963698	-0.174330575	0.161073498	0.999821727	FALSE
1046	PF3D7_0808600.e1s2_6520	-0.534410879	-0.337821463	1.03486343	0.196589416	0.081670478	0.999821727	FALSE
1047	PF3D7_0808600.e2s1_8343	1.756258771	1.767671021	0.037642832	0.01141225	0.936964058	0.999821727	FALSE
1048	PF3D7_0808700.iso1.exon1.amp1_3035	0.760684994	0.812036875	0.119895214	0.051351881	0.801884673	0.999821727	FALSE
1049	PF3D7_0808700.iso1.exon2.amp1_2238	-0.787914791	-0.825572859	0.302737027	-0.037658068	0.535571477	0.999821727	FALSE
1050	PF3D7_0808800.iso1.exon1.amp1_3594	0.243984139	0.313321779	0.045654698	0.06933764	0.923600528	0.999821727	FALSE
1051	PF3D7_0808900.iso1.exon1.amp1_4458	-0.088085809	-0.161691036	0.060315639	-0.073605227	0.8992291	0.999821727	FALSE
1052	PF3D7_0809100.iso1.exon1.amp1_4184	1.13612456	1.214479741	0.596777228	0.078355181	0.252959068	0.999821727	FALSE
1053	PF3D7_0809100.iso1.exon2.amp1_1077	-0.449481249	-0.380711121	0.243555708	0.068770129	0.614963157	0.999821727	FALSE
1054	PF3D7_0809100.iso1.exon2.amp2_seg2_2600	-0.421474763	-0.241889739	0.639293795	0.179585023	0.226075324	0.999821727	FALSE
1055	PF3D7_0809200.e1s2_6342	-0.267209443	-0.180691596	0.122892339	0.086517847	0.797082559	0.999821727	FALSE
1056	PF3D7_0809500.iso1.exon1.amp1_3552	-0.726208112	-0.686800742	0.310073832	0.039407371	0.526248094	0.999821727	FALSE
1057	PF3D7_0809600.iso1.exon1.amp4_seg1_2308	-0.447995494	-0.46197797	0.036139103	-0.013982476	0.939475193	0.999821727	FALSE
1058	PF3D7_0809900.iso1.exon1.amp1_seg2_287	0.164373635	0.235426047	0.315942513	0.071052412	0.518874973	0.999821727	FALSE
1059	PF3D7_0809900.iso1.exon1.amp2_seg2_576	0.062928183	0.057105638	0.014332586	-0.005822546	0.975968664	0.999821727	FALSE
1060	PF3D7_0810300.2o4_8207	-0.338381954	-0.27402414	0.101370764	0.064357814	0.831791607	0.999821727	FALSE
1061	PF3D7_0810800.e2s1_9231	0.039570092	0.162141473	0.225184832	0.122571381	0.641058066	0.999821727	FALSE
1062	PF3D7_0810900.1.1o2_7001	-0.158475033	-0.021464879	0.988618294	0.137010154	0.091563123	0.999821727	FALSE
1063	PF3D7_0811600.e2s1_6045	-0.948420133	-0.879816814	0.226975311	0.068603319	0.638486051	0.999821727	FALSE
1064	PF3D7_0811600.e2s2_7207	0.540364461	0.737829377	0.165345422	0.197464916	0.730330757	0.999821727	FALSE
1065	PF3D7_0812100.e1s1_5364	-0.26606867	-0.131379881	0.313178148	0.134688789	0.522338589	0.999821727	FALSE
1066	PF3D7_0812400.e1s1_6614	-0.288323534	-0.170174652	0.408771759	0.118148882	0.412407691	0.999821727	FALSE
1067	PF3D7_0812600.iso1.exon2.amp1_4140	-0.365674183	-0.322407631	0.246364349	0.043266552	0.611032057	0.999821727	FALSE
1068	PF3D7_0812700.1o1_7561	0.261307341	0.315290083	0.248109668	0.053982742	0.608597169	0.999821727	FALSE
1069	PF3D7_0812900.2o2_8824	-0.579551526	-0.605985912	0.098751642	-0.026434386	0.836049525	0.999821727	FALSE
1070	PF3D7_0813400.e2s1_6043	-0.230163168	-0.261301194	0.048124407	-0.031138026	0.919487029	0.999821727	FALSE
1071	PF3D7_0813700.iso1.exon1.amp2_2781	-0.709689071	-0.552944382	1.103208594	0.156744689	0.069180391	0.999821727	FALSE
1072	PF3D7_0813900.e2s1_8892	-0.772431446	-0.775978664	0.041642931	-0.003547218	0.930288548	0.999821727	FALSE
1073	PF3D7_0814600.e1s1_5462	-0.756598409	-0.572386997	0.521896555	0.184211412	0.308037552	0.999821727	FALSE
1074	PF3D7_0815100.iso1.exon1.amp1_2474	-0.820767129	-0.813834001	0.020648372	0.006933128	0.965386999	0.999821727	FALSE
1075	PF3D7_0815300.iso1.exon1.amp1_4308	-0.327164345	-0.260673703	0.469792038	0.066490642	0.35276895	0.999821727	FALSE
1076	PF3D7_0815300.iso1.exon1.amp2_seg1_2595	-0.220422491	-0.176557451	0.206017737	0.04386504	0.668967856	0.999821727	FALSE
1077	PF3D7_0815400.e1s1_8889	-0.894401916	-0.855940487	0.196288324	0.038461429	0.683390844	0.999821727	FALSE
1078	PF3D7_0815500.3o5_7032	1.474047211	1.476337281	0.004497543	0.00229007	0.99245755	0.999821727	FALSE
1079	PF3D7_0816100.1o4_7264	-0.823518586	-0.692487343	0.465256579	0.131031243	0.356927161	0.999821727	FALSE
1080	PF3D7_0816200.1o1_6682	0.02061912	-0.105011524	0.135424095	-0.125630644	0.777123688	0.999821727	FALSE
1081	PF3D7_0816500.e2s1_4845	-0.539579038	-0.561635125	0.129237499	-0.022056087	0.786952132	0.999821727	FALSE
1082	PF3D7_0816600.e1s1_6325	-0.596173125	-0.458131554	0.422651158	0.138041571	0.398132909	0.999821727	FALSE
1083	PF3D7_0816700.iso1.exon3.amp1_4095	-0.245037957	-0.338421822	0.350282429	-0.093383865	0.477255149	0.999821727	FALSE
1084	PF3D7_0817300.e1s3_7500	1.121053808	1.361121799	0.451139723	0.240067991	0.370148408	0.999821727	FALSE
1085	PF3D7_0817700.iso1.exon14.amp1_1790	-1.140290403	-1.104900635	0.096586883	0.035389768	0.839573927	0.999821727	FALSE
1086	PF3D7_0817700.iso1.exon15.amp1_2691	-0.666371687	-0.644869474	0.104939368	0.021502213	0.826001361	0.999821727	FALSE
1087	PF3D7_0818500.e2_5381	-0.278749999	-0.235836264	0.05545225	0.042913734	0.907300427	0.999821727	FALSE
1088	PF3D7_0818900_4784	0.181307452	0.354690218	0.311193546	0.173382765	0.524835522	0.999821727	FALSE
1089	PF3D7_0819600.2o2_6409	-0.611363862	-0.579277849	0.235209475	0.032086013	0.626737066	0.999821727	FALSE
1090	PF3D7_0819800.e4s1_8607	0.430479309	0.034946764	1.289694239	-0.395532545	0.044839429	0.999821727	FALSE
1091	PF3D7_0820600.3o3_6147	-0.690275604	-0.776753845	0.477236784	-0.086478241	0.346036936	0.999821727	FALSE
1092	PF3D7_0821000.1o5_7907	-0.145367029	-0.125343137	0.107830384	0.020023892	0.821320309	0.999821727	FALSE
1093	PF3D7_0821300.iso1.exon1.amp1_3317	0.129168035	0.035279797	0.279012763	-0.093888238	0.566514842	0.999821727	FALSE
1094	PF3D7_0821300.iso1.exon3.amp1_3898	-0.347394872	-0.244529134	0.124171135	0.102865738	0.795036907	0.999821727	FALSE
1095	PF3D7_0821500.1o1_8442	0.364759515	0.341743464	0.063188504	-0.02301605	0.894468107	0.999821727	FALSE
1096	PF3D7_0821600.1o1_4738	-0.486580191	-0.486829188	0.004387092	-0.000248997	0.99264277	0.999821727	FALSE
1097	PF3D7_0822600.e2s1_7209	-1.351767786	-1.312945037	0.08441996	0.038822749	0.859464704	0.999821727	FALSE
1098	PF3D7_0823300 (renamed, has duplicates)_6432	0.705876995	0.897474341	0.121202849	0.191597345	0.799788211	0.999821727	FALSE
1099	PF3D7_0823300.e1s1_7488	-0.582601799	-0.298640997	0.287607338	0.283960802	0.555165784	0.999821727	FALSE
1100	PF3D7_0823300.e1s2_7199	0.376926742	0.416234452	0.16612264	0.039307711	0.729132813	0.999821727	FALSE
1101	PF3D7_0823500.1o1_5877	0.260404244	0.700469856	0.286719833	0.440065612	0.556330448	0.999821727	FALSE
1102	PF3D7_0823800_6524	-0.580694453	-0.625555703	0.138598183	-0.04486125	0.772100474	0.999821727	FALSE
1103	PF3D7_0823900.1o1_8440	-0.120638202	-0.124188454	0.00404983	-0.003550251	0.993208345	0.999821727	FALSE
1104	PF3D7_0824200.iso1.exon2.amp1_seg1_3174	-0.59396969	-0.549436853	0.372692004	0.044532837	0.451509063	0.999821727	FALSE
1105	PF3D7_0824200.iso1.exon2.amp2_seg1_3463	-0.250836394	-0.158492504	0.67131848	0.09234389	0.207726466	0.999821727	FALSE
1106	PF3D7_0824600.1o5_8431	-0.650076681	-0.603620962	0.173778805	0.046455718	0.717382639	0.999821727	FALSE
1107	PF3D7_0824700.iso1.exon16.amp1_3245	-0.056362795	-0.041102206	0.011666405	0.015260589	0.980437618	0.999821727	FALSE
1108	PF3D7_0825200.iso1.exon1.amp1_2065	-0.624519986	-0.671935838	0.312609291	-0.047415852	0.523053417	0.999821727	FALSE
1109	PF3D7_0825200.iso1.exon4.amp1_4086	-0.439872772	-0.416740424	0.386329567	0.023132348	0.436389247	0.999821727	FALSE
1110	PF3D7_0825600.iso1.exon1.amp1_3549	-0.120746166	-0.079735641	0.032111638	0.041010525	0.946204913	0.999821727	FALSE
1111	PF3D7_0825800.iso1.exon1.amp1_1307	0.394325628	0.515843641	0.127289242	0.121518013	0.790057343	0.999821727	FALSE
1112	PF3D7_0826000.iso1.exon1.amp2_3371	-0.415132702	-0.370479023	0.077479446	0.044653679	0.870869189	0.999821727	FALSE
1113	PF3D7_0826100.s1_5414	-0.80673737	-0.781196218	0.143004893	0.025541152	0.765148934	0.999821727	FALSE
1114	PF3D7_0826100.s2_5703	-0.164654809	-0.131073067	0.187113444	0.033581742	0.697143196	0.999821727	FALSE
1115	PF3D7_0826100.s3_8299	-0.838946509	-0.905849502	0.242232351	-0.066902993	0.616820826	0.999821727	FALSE
1116	PF3D7_0826100.s4_8588	0.102961968	-0.029101792	0.71580924	-0.13206376	0.184718954	0.999821727	FALSE
1117	PF3D7_0826100.s8_8594	-0.410020109	-0.416063168	0.015591755	-0.006043059	0.973858451	0.999821727	FALSE
1118	PF3D7_0826300.1o1_6730	0.801219146	0.876512037	0.137559127	0.075292891	0.773743381	0.999821727	FALSE
1119	PF3D7_0826400.iso1.exon6.amp1_665	0.372872127	0.4435096	0.096593817	0.070637473	0.839562631	0.999821727	FALSE
1120	PF3D7_0826500.e1s1_5469	-0.314763991	0.001835673	0.722559975	0.316599665	0.181464512	0.999821727	FALSE
1121	PF3D7_0826500.e1s2_5180	-0.346431968	-0.401607193	0.052907345	-0.055175225	0.911529454	0.999821727	FALSE
1122	PF3D7_0826700.e2_6241	-0.296256653	-0.255528431	0.083310943	0.040728222	0.861284323	0.999821727	FALSE
1123	PF3D7_0827100.s2_5089	-0.349575391	-0.221491513	0.120472906	0.128083878	0.800958239	0.999821727	FALSE
1124	PF3D7_0827600.2o2_6223	1.488731919	1.77074287	0.281417999	0.282010952	0.563322946	0.999821727	FALSE
1125	PF3D7_0827800.e1s1_6935	-0.555897638	-0.579591035	0.031259231	-0.023693396	0.947629966	0.999821727	FALSE
1126	PF3D7_0827800.e1s3_6929	-0.389604725	-0.352723155	0.256091646	0.03688157	0.597539748	0.999821727	FALSE
1127	PF3D7_0827900.e2_7119	-0.081388775	0.107694923	0.238254722	0.189083698	0.622425297	0.999821727	FALSE
1128	PF3D7_0828100.iso1.exon3.amp1_1012	-0.37861266	-0.389528102	0.044038894	-0.010915442	0.926293355	0.999821727	FALSE
1129	PF3D7_0828200.iso1.exon1.amp2_1624	0.280270301	0.523828746	0.271334175	0.243558444	0.576786404	0.999821727	FALSE
1130	PF3D7_0828400.1o1_8192	-0.060734303	-0.089588731	0.082595153	-0.028854427	0.862459309	0.999821727	FALSE
1131	PF3D7_0828500.4o4_8157	-0.884586511	-0.864279073	0.028709748	0.020307438	0.951893583	0.999821727	FALSE
1132	PF3D7_0829000.e2s1_7406	-0.54797424	-0.488636088	0.211318781	0.059338153	0.661180979	0.999821727	FALSE
1133	PF3D7_0829600.1o1_8708	-0.595269084	-0.51318608	0.337924803	0.082083004	0.491931446	0.999821727	FALSE
1134	PF3D7_0830600.2o2_6153	-0.010215594	-0.155051969	0.371905884	-0.144836375	0.452393264	0.999821727	FALSE
1135	PF3D7_0830800.iso1.exon1.amp1_1373	0.467492414	0.757223278	0.843554352	0.289730864	0.132323093	0.999821727	FALSE
1136	PF3D7_0830800.iso1.exon1.amp2_4505	0.067486152	0.282078324	0.399192651	0.214592172	0.422507307	0.999821727	FALSE
1137	PF3D7_0830800.iso1.exon2.amp1_1892	0.245042634	0.494428062	0.489080542	0.249385428	0.335564389	0.999821727	FALSE
1138	PF3D7_0831100.iso1.exon1.amp2_3348	-0.4862031	-0.485201331	0.001143046	0.001001769	0.998083057	0.999821727	FALSE
1139	PF3D7_0831100.iso1.exon2.amp1_4116	-0.37195025	-0.286643485	0.356006181	0.085306765	0.470572681	0.999821727	FALSE
1140	PF3D7_0831200.iso1.exon1.amp1_2190	-0.210311428	-0.225625927	0.117176595	-0.015314499	0.806249732	0.999821727	FALSE
1141	PF3D7_0831300.2o2_7356	-0.05893895	-0.046295425	0.012512432	0.012643525	0.979019436	0.999821727	FALSE
1142	PF3D7_0831400.2o2_8450	-0.412944034	-0.341258645	0.439754748	0.071685389	0.381121304	0.999821727	FALSE
1143	PF3D7_0831500.iso1.exon2.amp1_2951	1.22375496	1.147485872	0.043911101	-0.076269088	0.926506382	0.999821727	FALSE
1144	PF3D7_0831500.iso1.exon3.amp1_1846	-0.70608211	-0.719234576	0.127247899	-0.013152466	0.790123289	0.999821727	FALSE
1145	PF3D7_0831700.2o2_5026	0.11758396	0.361885845	0.117025967	0.244301885	0.806491834	0.999821727	FALSE
1146	PF3D7_0831800.2o2_5849	-0.094101841	-0.000281088	0.539617092	0.093820753	0.294057787	0.999821727	FALSE
1147	PF3D7_0832000.iso1.exon3.amp1_1848	-0.30927223	-0.280832904	0.05421135	0.028439327	0.909362054	0.999821727	FALSE
1148	PF3D7_0832300.2o2_7858	-0.37709365	-0.313953664	0.622887555	0.063139986	0.236096429	0.999821727	FALSE
1149	PF3D7_0832400.iso1.exon3.amp1_1853	0.152357094	0.329290362	0.099886089	0.176933269	0.834204403	0.999821727	FALSE
1150	PF3D7_0832800.iso1.exon3.amp1_1854	1.279117232	1.440112345	0.261635837	0.160995113	0.589935661	0.999821727	FALSE
1151	PF3D7_0832900.iso1.exon3.amp1_986	1.40596715	1.463369006	0.111466636	0.057401856	0.815445371	0.999821727	FALSE
1152	PF3D7_0833000.iso1.exon3.amp1_3881	0.931303818	0.974277805	0.198961069	0.042973987	0.67941205	0.999821727	FALSE
1153	PF3D7_0833100.iso1.exon3.amp1_4170	0.366388047	0.345372499	0.040951852	-0.021015548	0.931441369	0.999821727	FALSE
1154	PF3D7_0833200.iso1.exon3.amp1_3030	0.616310054	0.699250926	0.165056472	0.082940872	0.730776359	0.999821727	FALSE
1155	PF3D7_0833300.iso1.exon1.amp1_1870	0.815640125	0.870957396	0.060817015	0.055317271	0.898397828	0.999821727	FALSE
1156	PF3D7_0833400.iso1.exon3.amp1_4185	-0.08039401	-0.051736533	0.844962376	0.028657477	0.131842865	0.999821727	FALSE
1157	PF3D7_0833500.iso1.exon3.amp1_3614	1.695023339	1.942718319	0.381986923	0.24769498	0.44115892	0.999821727	FALSE
1158	PF3D7_0900100.iso1.exon2.amp1_151	2.225830143	2.388735471	0.697883578	0.162905328	0.193656811	0.999821727	FALSE
1159	PF3D7_0900200.e2s1_8924	0.588575612	0.666172816	0.160526471	0.077597204	0.737778958	0.999821727	FALSE
1160	PF3D7_0900300.iso1.exon1.amp1_1001	0.705047025	0.749269514	0.214934261	0.04422249	0.655899552	0.999821727	FALSE
1161	PF3D7_0900400.iso1.exon2.amp1_1867	0.189531172	0.259668099	1.719277253	0.070136927	0.018389962	0.999821727	FALSE
1162	PF3D7_0900500.iso1.exon1.amp1_4464	1.988324994	2.279761034	0.232704622	0.29143604	0.630297256	0.999821727	FALSE
1163	PF3D7_0900600.iso1.exon1.amp1_424	0.194561051	0.366550002	0.178735612	0.17198895	0.709825079	0.999821727	FALSE
1164	PF3D7_0900700.iso1.exon1.amp1_2726	-0.049800943	0.043197279	0.166576951	0.092998222	0.728433005	0.999821727	FALSE
1165	PF3D7_0900900.iso1.exon1.amp1_4454	1.33968497	1.499376212	0.26476203	0.159691242	0.585675801	0.999821727	FALSE
1166	PF3D7_0901000.iso1.exon1.amp1_3010	2.123298011	2.197894893	0.364797541	0.074596883	0.46045109	0.999821727	FALSE
1167	PF3D7_0901100.iso1.exon1.amp1_3608	-0.125741486	0.029172586	0.46132717	0.154914071	0.360564803	0.999821727	FALSE
1168	PF3D7_0901300.iso1.exon2.amp1_1859	0.538778277	0.569777146	0.049382505	0.030998869	0.917392726	0.999821727	FALSE
1169	PF3D7_0901400.iso1.exon2.amp1_711	-0.357008504	-0.370369759	0.082523978	-0.013361255	0.862576168	0.999821727	FALSE
1170	PF3D7_0901500.iso1.exon2.amp1_4476	0.883150951	1.095643756	0.656935831	0.212492805	0.215773695	0.999821727	FALSE
1171	PF3D7_0901600.iso1.exon2.amp1_1269	0.550250077	0.575249803	0.025012179	0.024999727	0.958080615	0.999821727	FALSE
1172	PF3D7_0901800.2o2_8725	1.267669646	1.280380406	0.016951566	0.01271076	0.971579866	0.999821727	FALSE
1173	PF3D7_0902200.2o3_7910	0.349819227	0.479061467	0.18104594	0.129242241	0.706316222	0.999821727	FALSE
1174	PF3D7_0902300.2o3_7037	-0.183892792	-0.169173958	0.024728525	0.014718834	0.958555398	0.999821727	FALSE
1175	PF3D7_0902400.iso1.exon2.amp1_1014	-0.512645578	-0.450413076	0.126700043	0.062232502	0.790997365	0.999821727	FALSE
1176	PF3D7_0902600.2o3_8194	0.029458407	0.266489191	0.11972785	0.237030784	0.802153144	0.999821727	FALSE
1177	PF3D7_0902800.2o4_7652	-0.035510505	0.065638887	0.055187755	0.101149392	0.907739783	0.999821727	FALSE
1178	PF3D7_0902800.4o4_7941	0.361475155	0.442732106	0.190072979	0.081256952	0.692691348	0.999821727	FALSE
1179	PF3D7_0902900.1o1_8123	-0.011495992	0.269177839	0.210131246	0.28067383	0.662920944	0.999821727	FALSE
1180	PF3D7_0903000.1o1_9002	0.10728639	0.103064423	0.009737898	-0.004221967	0.983670662	0.999821727	FALSE
1181	PF3D7_0903000_5973	0.13568213	0.180252952	0.080135728	0.044570822	0.866499774	0.999821727	FALSE
1182	PF3D7_0903300.iso1.exon1.amp3_3123	-0.399889835	-0.37297144	0.173931509	0.026918394	0.717149224	0.999821727	FALSE
1183	PF3D7_0903300.iso1.exon1.amp4_1038	0.321667612	0.207288651	0.074284126	-0.114378961	0.876132668	0.999821727	FALSE
1184	PF3D7_0903400.e1s3_8886	-0.474403316	-0.348318065	0.162754112	0.12608525	0.734331507	0.999821727	FALSE
1185	PF3D7_0903500.e1s1_7220	1.788103885	2.21343686	0.671586426	0.425332975	0.20757947	0.999821727	FALSE
1186	PF3D7_0903500.e1s2_7214	1.028240331	1.175845822	0.091394226	0.14760549	0.848046382	0.999821727	FALSE
1187	PF3D7_0903700.e3s1_4884	0.091851455	0.165551493	0.101564755	0.073700038	0.83147651	0.999821727	FALSE
1188	PF3D7_0903800.iso1.exon2.amp1_1662	-0.985605958	-0.93557392	0.186813208	0.050032038	0.697595653	0.999821727	FALSE
1189	PF3D7_0903800.iso1.exon2.amp2_3644	-0.189196749	-0.176814187	0.011327717	0.012382562	0.98100538	0.999821727	FALSE
1190	PF3D7_0904900.e1s1_8018	-0.309378784	-0.176382023	1.019624906	0.132996761	0.084791186	0.999821727	FALSE
1191	PF3D7_0904900.e1s3_6567	-0.277618453	-0.12276547	0.136481395	0.154852983	0.775448957	0.999821727	FALSE
1192	PF3D7_0905100.iso1.exon2.amp1_4406	-0.703280444	-0.649309368	0.407563372	0.053971076	0.413670563	0.999821727	FALSE
1193	PF3D7_0905100.iso1.exon3.amp1_1647	0.965336582	0.950164001	0.0464362	-0.015172581	0.922298554	0.999821727	FALSE
1194	PF3D7_0905300.s5_9157	0.181418674	0.242432167	0.067774902	0.061013493	0.886878628	0.999821727	FALSE
1195	PF3D7_0905300.s6_8296	0.12460105	-0.187492927	0.446398865	-0.312093976	0.37468382	0.999821727	FALSE
1196	PF3D7_0905300.s7_8001	-0.169671214	-0.038792297	0.857425857	0.130878917	0.127673297	0.999821727	FALSE
1197	PF3D7_0905400.e7s1_7466	-0.089138811	-0.117517413	0.02622953	-0.028378602	0.956043237	0.999821727	FALSE
1198	PF3D7_0905600.2o2_5648	-0.388991627	-0.401814809	0.106144986	-0.012823182	0.82404818	0.999821727	FALSE
1199	PF3D7_0905900.iso1.exon1.amp1_3487	-0.353203767	-0.352387	0.003374011	0.000816767	0.994341678	0.999821727	FALSE
1200	PF3D7_0905900.iso1.exon1.amp2_seg1_1439	-0.234095533	-0.088925015	0.697245469	0.145170518	0.193983069	0.999821727	FALSE
1201	PF3D7_0906200.1o1_7631	-0.525911768	-0.467239604	0.114671238	0.058672164	0.810279951	0.999821727	FALSE
1202	PF3D7_0906300.1o1_4700	-0.132468194	-0.232208297	0.196995128	-0.099740103	0.682337439	0.999821727	FALSE
1203	PF3D7_0906400.e1s1_9120	-0.689759705	-0.752241835	0.223354483	-0.062482129	0.643693659	0.999821727	FALSE
1204	PF3D7_0906500.1o1_4999	1.672709409	1.658403473	0.009370313	-0.014305936	0.984286945	0.999821727	FALSE
1205	PF3D7_0906900.1o2_5563	-0.50350723	-0.520975714	0.122690133	-0.017468484	0.797406204	0.999821727	FALSE
1206	PF3D7_0907200.e1s2_8934	-0.098366629	-0.073241663	0.031405224	0.025124965	0.947385879	0.999821727	FALSE
1207	PF3D7_0907600.iso1.exon2.amp1_4206	-0.234868299	-0.070741699	0.345822112	0.1641266	0.48251317	0.999821727	FALSE
1208	PF3D7_0907700.e1s1_8630	0.510594621	0.878882671	0.645234104	0.36828805	0.222552614	0.999821727	FALSE
1209	PF3D7_0908200.iso1.exon2.amp1_4259	-0.655871553	-0.603454845	0.410902907	0.052416708	0.410188299	0.999821727	FALSE
1210	PF3D7_0908300.iso2.exon2.amp1_3507	0.311312364	0.54956032	1.545835606	0.238247955	0.02589811	0.999821727	FALSE
1211	PF3D7_0908400.2o2_5815	-0.662493095	-0.682444479	0.203248317	-0.019951384	0.67305614	0.999821727	FALSE
1212	PF3D7_0908500.e15s1_7738	-0.450668916	-0.380987755	0.098943806	0.069681161	0.83573689	0.999821727	FALSE
1213	PF3D7_0908500.e17s1_8622	-0.596631128	-0.549316223	0.314625812	0.047314905	0.520522647	0.999821727	FALSE
1214	PF3D7_0908500.e4s1_8616	-0.637826956	-0.768381874	0.195710378	-0.130554918	0.684252848	0.999821727	FALSE
1215	PF3D7_0908700.iso1.exon6.amp1_4386	-0.879973403	-0.846396927	0.297645831	0.033576476	0.542109931	0.999821727	FALSE
1216	PF3D7_0909100.1o1_4745	-8.22E-05	-0.019793493	0.16163625	-0.019711295	0.736060548	0.999821727	FALSE
1217	PF3D7_0909500_5686	2.418325413	2.488142772	0.062918315	0.06981736	0.894915646	0.999821727	FALSE
1218	PF3D7_0909600.3o3_8193	-0.570264696	-0.484760643	0.204667822	0.085504053	0.670958913	0.999821727	FALSE
1219	PF3D7_0909700.iso1.exon1.amp1_1703	0.696920468	0.641097507	0.118091233	-0.055822961	0.804780211	0.999821727	FALSE
1220	PF3D7_0909900.iso1.exon1.amp1_1689	-0.175916284	-0.145707482	0.066532326	0.030208803	0.888933411	0.999821727	FALSE
1221	PF3D7_0909900.iso1.exon1.amp2_2197	-0.183621545	-0.06513568	0.079975987	0.118485865	0.866762376	0.999821727	FALSE
1222	PF3D7_0910000.iso1.exon1.amp2_1355	-0.683643148	-0.640783495	0.256658837	0.042859653	0.596758935	0.999821727	FALSE
1223	PF3D7_0910200.iso1.exon1.amp1_1395	0.125604717	0.297234866	0.475118667	0.171630149	0.347940488	0.999821727	FALSE
1224	PF3D7_0910400.iso1.exon1.amp2_seg1_2878	-0.633026015	-0.539453698	0.114004772	0.093572317	0.811353261	0.999821727	FALSE
1225	PF3D7_0910400.iso1.exon1.amp2_seg2_864	-0.463834904	-0.370142341	0.124043832	0.093692563	0.795240462	0.999821727	FALSE
1226	PF3D7_0910900.iso1.exon2.amp1_3342	0.212321512	0.25088021	0.208593014	0.038558699	0.665178571	0.999821727	FALSE
1227	PF3D7_0911100.e1s1_9127	-0.845287867	-0.9526885	0.217479463	-0.107400634	0.652196064	0.999821727	FALSE
1228	PF3D7_0911300.e1s2_8013	-0.350867869	-0.404792914	0.175698302	-0.053925045	0.714451305	0.999821727	FALSE
1229	PF3D7_0911900.2o2_4716	2.469344324	2.30581796	0.65663387	-0.163526364	0.215945982	0.999821727	FALSE
1230	PF3D7_0911900.e2_7125	0.94645919	0.855265328	0.119433775	-0.091193862	0.802624957	0.999821727	FALSE
1231	PF3D7_0912500.2o7_6421	-0.514433382	-0.48947421	0.163569423	0.024959172	0.733071631	0.999821727	FALSE
1232	PF3D7_0912600.iso1.exon1.amp1_741	-0.465055723	-0.421048974	0.081351519	0.044006749	0.864501786	0.999821727	FALSE
1233	PF3D7_0912600.iso1.exon2.amp1_4466	-0.822623347	-0.790165816	0.233245566	0.032457531	0.62952737	0.999821727	FALSE
1234	PF3D7_0912800.1o1_8778	0.01156847	0.440829197	0.282746653	0.429260728	0.561564996	0.999821727	FALSE
1235	PF3D7_0912900.e2s1_6018	-0.107635267	0.091099514	0.284477878	0.198734781	0.559280027	0.999821727	FALSE
1236	PF3D7_0913500.3o3_7012	-0.511814931	-0.473274192	0.272530056	0.038540738	0.57517855	0.999821727	FALSE
1237	PF3D7_0914000.1o1_7665	-0.97314957	-0.858300754	0.262244958	0.114848816	0.58910407	0.999821727	FALSE
1238	PF3D7_0914100.iso1.exon1.amp1_2279	-1.09938503	-1.047743609	0.254375774	0.051641421	0.599905857	0.999821727	FALSE
1239	PF3D7_0914200.3o4_7023	-0.360020271	-0.225188984	0.548638608	0.134831287	0.287171963	0.999821727	FALSE
1240	PF3D7_0914800.1o1_6098	-1.053993155	-1.046510604	0.028923463	0.007482551	0.951536102	0.999821727	FALSE
1241	PF3D7_0915300.iso1.exon1.amp1_149	-0.435257896	-0.359126066	0.200617266	0.07613183	0.676952849	0.999821727	FALSE
1242	PF3D7_0915400.e1s1_6348	0.841000917	0.887948684	0.034733657	0.046947767	0.941822974	0.999821727	FALSE
1243	PF3D7_0916200.iso1.exon1.amp1_2352	-0.774454447	-0.610510702	1.454848465	0.163943745	0.031282773	0.999821727	FALSE
1244	PF3D7_0916200.iso1.exon2.amp1_2241	-0.13175071	-0.382815575	0.776839696	-0.251064866	0.157376791	0.999821727	FALSE
1245	PF3D7_0916200.iso1.exon2.amp2_1904	-0.293958714	-0.378760315	0.635915841	-0.084801601	0.228103342	0.999821727	FALSE
1246	PF3D7_0916700.e1s1_6618	-0.664314024	-0.699531619	0.282754445	-0.035217594	0.561554697	0.999821727	FALSE
1247	PF3D7_0916800.iso1.exon1.amp1_3204	-0.306201318	-0.345492176	0.268665268	-0.039290858	0.580385498	0.999821727	FALSE
1248	PF3D7_0917000.iso1.exon1.amp2_1923	-0.561248388	-0.591167404	0.12864803	-0.029919016	0.78789115	0.999821727	FALSE
1249	PF3D7_0917200.2o2_4677	-0.533117511	-0.53290414	0.000199459	0.000213372	0.999665497	0.999821727	FALSE
1250	PF3D7_0917300.1o1_6428	-0.853624246	-0.93081039	0.811818811	-0.077186144	0.143662496	0.999821727	FALSE
1251	PF3D7_0917500.e1s1_7508	-0.584271817	-0.473952783	0.34304284	0.110319034	0.485811895	0.999821727	FALSE
1252	PF3D7_0917900.e2_8279	0.289608704	0.321500768	0.030536573	0.031892065	0.948838292	0.999821727	FALSE
1253	PF3D7_0918000.e1s1_8347	-0.429261938	-0.445970036	0.032895927	-0.016708098	0.944893952	0.999821727	FALSE
1254	PF3D7_0918300.e2s1_6599	0.832749679	1.160017963	0.143907767	0.327268284	0.763727926	0.999821727	FALSE
1255	PF3D7_0918900.e1s1_7198	0.246357903	0.336466406	0.070248322	0.090108503	0.882791682	0.999821727	FALSE
1256	PF3D7_0918900.e1s2_7481	-0.161719947	-0.242481115	0.197200225	-0.080761168	0.68203193	0.999821727	FALSE
1257	PF3D7_0919200.iso1.exon1.amp1_389	-0.739163485	-0.68711991	0.419384945	0.052043575	0.401454108	0.999821727	FALSE
1258	PF3D7_0919400.e1s1_4873	-0.731699075	-0.576614811	0.274376824	0.155084265	0.572701469	0.999821727	FALSE
1259	PF3D7_0919800.iso1.exon1.amp1_3111	0.111603541	0.126861973	0.097740775	0.015258432	0.837694724	0.999821727	FALSE
1260	PF3D7_0919800.iso1.exon1.amp2_seg1_1133	0.031636637	0.039903639	0.009923467	0.008267002	0.983359546	0.999821727	FALSE
1261	PF3D7_0919900.iso1.exon1.amp1_1105	-0.659570424	-0.721946902	0.348693176	-0.062376478	0.47912355	0.999821727	FALSE
1262	PF3D7_0919900.iso1.exon1.amp4_1035	-0.375627615	-0.283399371	0.442328447	0.092228244	0.37861636	0.999821727	FALSE
1263	PF3D7_0920300.1o4_5819	-0.958158047	-0.68716668	0.458726748	0.270991368	0.362990109	0.999821727	FALSE
1264	PF3D7_0920400.s1_5698	-0.85219236	-0.837928223	0.267727285	0.014264137	0.581653919	0.999821727	FALSE
1265	PF3D7_0920800.e1s1_4875	-0.566988795	-0.594398537	0.069101229	-0.027409742	0.884686538	0.999821727	FALSE
1266	PF3D7_0920900.iso1.exon2.amp1_3864	0.070180773	0.109948334	0.22102922	0.03976756	0.647051048	0.999821727	FALSE
1267	PF3D7_0921200.2o6_8242	-0.993175294	-1.03087285	0.166519427	-0.037697556	0.728521596	0.999821727	FALSE
1268	PF3D7_0921400.e1_5664	-0.787483074	-0.734305942	0.222243378	0.053177133	0.645296681	0.999821727	FALSE
1269	PF3D7_0921800.1o3_8466	-1.031948614	-1.071311808	0.039493927	-0.039363194	0.933874064	0.999821727	FALSE
1270	PF3D7_0922100.e1s2_8955	-1.493753792	-1.433330827	0.063126547	0.060422965	0.894570728	0.999821727	FALSE
1271	PF3D7_0922200.e1s1_7191	-0.664068063	-0.475261024	0.320970932	0.188807039	0.512617621	0.999821727	FALSE
1272	PF3D7_0922500_7709	-0.169767781	0.028197805	0.488921698	0.197965586	0.335702929	0.999821727	FALSE
1273	PF3D7_0922800.iso1.exon4.amp3_229	-0.525000093	-0.373103906	0.359471171	0.151896187	0.466562811	0.999821727	FALSE
1274	PF3D7_0923800.1.e1s1_7487	0.21651329	0.307812891	0.784063271	0.0912996	0.154434591	0.999821727	FALSE
1275	PF3D7_0923800.iso2.exon1.amp1_446	0.176721505	0.389593498	1.553772658	0.212871993	0.025482753	0.999821727	FALSE
1276	PF3D7_0924000.iso1.exon1.amp1_3692	-0.502188182	-0.495925864	0.008802779	0.006262318	0.985238483	0.999821727	FALSE
1277	PF3D7_0924000.iso1.exon1.amp2_3981	-0.058864977	0.157772231	0.185590436	0.216637208	0.699439937	0.999821727	FALSE
1278	PF3D7_0924000.iso1.exon2.amp1_2373	-0.657034676	-0.604325221	0.303067051	0.052709455	0.535149577	0.999821727	FALSE
1279	PF3D7_0924200.iso1.exon1.amp1_2570	-0.658409348	-0.514417086	0.530336754	0.143992261	0.301303253	0.999821727	FALSE
1280	PF3D7_0924600.iso1.exon1.amp1_2177	1.326017018	1.23019812	0.123171737	-0.095818898	0.796635446	0.999821727	FALSE
1281	PF3D7_0924600.iso1.exon2.amp2_seg1_2289	-0.723802508	-0.660982571	0.327238387	0.062819937	0.50489637	0.999821727	FALSE
1282	PF3D7_0925300.1o1_6180	-1.049087135	-1.048369846	0.008365429	0.000717289	0.985971772	0.999821727	FALSE
1283	PF3D7_0925800.e1s1_9121	-0.435746798	-0.472430631	0.07010948	-0.036683833	0.883020981	0.999821727	FALSE
1284	PF3D7_0925900.e2s1_8042	-0.852130683	-0.823293279	0.194045919	0.028837404	0.686738631	0.999821727	FALSE
1285	PF3D7_0926200.iso1.exon1.amp1_3505	-0.61612671	-0.526915208	0.282484885	0.089211502	0.561911047	0.999821727	FALSE
1286	PF3D7_0926500.iso1.exon1.amp2_2495	-0.581109095	-0.491188736	0.29391066	0.089920359	0.546942511	0.999821727	FALSE
1287	PF3D7_0927300.e1s1_7797	-0.854095922	-0.767833197	0.10703878	0.086262725	0.822601168	0.999821727	FALSE
1288	PF3D7_0927700.1o1_7283	-0.668300161	-0.736585039	0.32590318	-0.068284878	0.506534025	0.999821727	FALSE
1289	PF3D7_0927800.2o2_4680	-0.806946158	-0.96413277	0.977607778	-0.157186612	0.094111745	0.999821727	FALSE
1290	PF3D7_0927900.1o1_4984	-0.914351953	-0.893389937	0.160479858	0.020962017	0.737851175	0.999821727	FALSE
1291	PF3D7_0928600.1o1_6100	-0.590077686	-0.656443153	0.255048489	-0.066365467	0.5989775	0.999821727	FALSE
1292	PF3D7_0928700.iso1.exon1.amp1_3151	-0.356737316	-0.184950965	0.160209961	0.171786352	0.738269391	0.999821727	FALSE
1293	PF3D7_0929000.2o2_8472	0.272521602	0.209614735	0.062873129	-0.062906867	0.894990496	0.999821727	FALSE
1294	PF3D7_0929000.e2_5102	0.247501581	0.097981675	0.132020993	-0.149519906	0.782523999	0.999821727	FALSE
1295	PF3D7_0929600.2o2_4963	-0.683738435	-0.839115602	3.87216394	-0.155377167	0.000978882	0.999821727	FALSE
1296	PF3D7_0929800.iso1.exon1.amp1_4123	-0.23863889	-0.288000285	0.052228214	-0.049361395	0.912658615	0.999821727	FALSE
1297	PF3D7_0929900.iso1.exon1.amp1_1496	-0.551108304	-0.435152921	0.308562025	0.115955382	0.528159655	0.999821727	FALSE
1298	PF3D7_0930100.iso1.exon1.amp2_192	-0.842154997	-0.833181616	0.093819693	0.008973382	0.844085757	0.999821727	FALSE
1299	PF3D7_0930200.iso1.exon4.amp1_2997	-0.682134352	-0.69720807	0.093916877	-0.015073719	0.843927177	0.999821727	FALSE
1300	PF3D7_0930300.s1_9167	0.017296507	0.253430151	0.151474845	0.236133644	0.75186308	0.999821727	FALSE
1301	PF3D7_0930300.s2_8884	1.583423503	1.761102169	0.764560856	0.177678666	0.162514949	0.999821727	FALSE
1302	PF3D7_0930600.iso1.exon5.amp1_2100	0.155368939	0.19375394	0.204830466	0.038385001	0.670718848	0.999821727	FALSE
1303	PF3D7_0930700.iso1.exon1.amp1_702	-0.329380549	-0.300249985	0.086445706	0.029130564	0.856143694	0.999821727	FALSE
1304	PF3D7_0930700.iso1.exon2.amp1_2944	-0.758820423	-0.786465675	0.200985826	-0.027645252	0.676406254	0.999821727	FALSE
1305	PF3D7_0931300.1o1_6427	-0.271487669	-0.335115008	0.311305007	-0.063627339	0.524695059	0.999821727	FALSE
1306	PF3D7_0931300_6263	-0.53863404	-0.587420633	0.305208301	-0.048786593	0.53241797	0.999821727	FALSE
1307	PF3D7_0931400.3o4_4980	-0.360007995	-0.522138952	0.734823818	-0.162130957	0.17570378	0.999821727	FALSE
1308	PF3D7_0931600.iso1.exon2.amp1_2996	-0.171039532	0.046246741	0.172554889	0.217286273	0.719254807	0.999821727	FALSE
1309	PF3D7_0931700.2o3_7353	0.398638033	0.389286212	0.037500061	-0.009351821	0.937202439	0.999821727	FALSE
1310	PF3D7_0931800.e1s1_7757	-0.668869895	-0.651954811	0.074958556	0.016915084	0.875021059	0.999821727	FALSE
1311	PF3D7_0932100.2o5_9117	-0.031285762	-0.050965805	0.06252001	-0.019680043	0.895575483	0.999821727	FALSE
1312	PF3D7_0932300.e1s1_4887	-0.12281144	0.032528967	0.242888512	0.155340407	0.615899301	0.999821727	FALSE
1313	PF3D7_0932700.iso1.exon1.amp2_4526	-0.909905167	-0.918406682	0.029562021	-0.008501516	0.950468063	0.999821727	FALSE
1314	PF3D7_0933100.4o4_8227	-0.766664598	-0.792323669	0.084439727	-0.025659071	0.859432281	0.999821727	FALSE
1315	PF3D7_0933500.s1_5707	-0.404466521	-0.42601839	0.155434005	-0.021551869	0.745687889	0.999821727	FALSE
1316	PF3D7_0933600.e1s1_8054	-0.578786485	-0.447195364	0.487809773	0.131591121	0.336674175	0.999821727	FALSE
1317	PF3D7_0933900.4o4_5828	0.708297775	0.589989803	0.122421304	-0.118307972	0.797836558	0.999821727	FALSE
1318	PF3D7_0934300.1o1_7830	-0.611579832	-0.611174473	0.000957099	0.000405359	0.998394898	0.999821727	FALSE
1319	PF3D7_0935600.1o2_7901	1.007661106	1.009549515	0.001792701	0.001888408	0.996993559	0.999821727	FALSE
1320	PF3D7_0935800.e1_5085	-0.458963831	-0.475012842	0.025853717	-0.016049011	0.956672161	0.999821727	FALSE
1321	PF3D7_0935800.e2_5959	-0.743517556	-0.50207208	0.344759942	0.241445476	0.483771833	0.999821727	FALSE
1322	PF3D7_0935800.e9_9148	0.919337461	1.205212465	0.259047656	0.285875003	0.593477624	0.999821727	FALSE
1323	PF3D7_0935900.e1s1_8599	-0.384834648	-0.5995217	1.107768896	-0.214687053	0.068427455	0.999821727	FALSE
1324	PF3D7_0935900.e2s1_9232	1.764592857	1.6584393	0.16656319	-0.106153557	0.728454198	0.999821727	FALSE
1325	PF3D7_0936200.2o2_4952	-0.251854376	-0.3899775	0.702368688	-0.138123124	0.191379493	0.999821727	FALSE
1326	PF3D7_0936300.2o2_8152	2.03023362	2.091144787	0.275542441	0.060911168	0.571141704	0.999821727	FALSE
1327	PF3D7_0936400.2o2_8989	0.116948367	0.246947066	0.221622989	0.1299987	0.64619275	0.999821727	FALSE
1328	PF3D7_0936500.iso1.exon1.amp1_973	-0.85720318	-0.909896298	0.071711978	-0.052693117	0.880375281	0.999821727	FALSE
1329	PF3D7_0936600.2o2_6426	0.235716666	0.261991627	0.080860694	0.026274961	0.865308244	0.999821727	FALSE
1330	PF3D7_0936700.1o1_7018	-0.673527788	-0.663102196	0.040113693	0.010425592	0.932839813	0.999821727	FALSE
1331	PF3D7_0936800.e2s1_5455	0.399924877	0.466628263	0.182142687	0.066703386	0.704653592	0.999821727	FALSE
1332	PF3D7_0937000.2o2_6410	-1.175673596	-1.190661238	0.08809751	-0.014987642	0.853438387	0.999821727	FALSE
1333	PF3D7_0937200.1o1_7291	-0.572172482	-0.377197727	0.328135586	0.194974756	0.503798152	0.999821727	FALSE
1334	PF3D7_0937300.iso1.exon2.amp1_3309	0.004654123	0.039057182	0.035636885	0.034403059	0.940314059	0.999821727	FALSE
1335	PF3D7_0937400.iso1.exon2.amp1_1296	0.521072907	0.606747867	0.105747132	0.08567496	0.824692561	0.999821727	FALSE
1336	PF3D7_0937500.iso1.exon1.amp1_4176	0.712497028	0.828086129	0.10000608	0.1155891	0.83400932	0.999821727	FALSE
1337	PF3D7_0937600.iso1.exon1.amp1_2479	-0.764946107	-0.63063366	0.540116558	0.134312448	0.293672521	0.999821727	FALSE
1338	PF3D7_0937600.iso1.exon2.amp1_3322	1.668881707	1.678325937	0.018388278	0.00944423	0.969172777	0.999821727	FALSE
1339	PF3D7_0937700.iso1.exon2.amp1_713	1.596600608	1.77874676	0.249800243	0.182146152	0.606244481	0.999821727	FALSE
1340	PF3D7_0937800.iso1.exon1.amp1_2169	0.200857153	0.145197094	0.079634041	-0.055660059	0.867324581	0.999821727	FALSE
1341	PF3D7_0937800.iso1.exon2.amp1_1654	-0.349190432	-0.197549881	0.30781572	0.15164055	0.529105138	0.999821727	FALSE
1342	PF3D7_1000100.iso1.exon2.amp1_3908	2.644493447	2.72508761	0.213779382	0.080594163	0.657583959	0.999821727	FALSE
1343	PF3D7_1000200.iso1.exon1.amp1_1575	2.706384288	2.860977546	0.170618191	0.154593259	0.722222151	0.999821727	FALSE
1344	PF3D7_1000300.iso1.exon1.amp1_3601	0.30906597	0.629972203	0.871051855	0.320906233	0.123277844	0.999821727	FALSE
1345	PF3D7_1000400.iso1.exon1.amp1_1864	0.702618133	0.862802634	0.385598309	0.160184501	0.437189473	0.999821727	FALSE
1346	PF3D7_1000500.iso1.exon3.amp1_4465	0.98813014	1.137394372	0.669027406	0.149264232	0.208987685	0.999821727	FALSE
1347	PF3D7_1001300.2o2_6130	0.409250219	0.386215603	0.055447879	-0.023034617	0.907307687	0.999821727	FALSE
1348	PF3D7_1001500.1o1_6967	0.471465159	0.556185378	0.04531048	0.084720219	0.924174086	0.999821727	FALSE
1349	PF3D7_1001600.2o2_4757	0.254310475	0.39169552	0.649138998	0.137385044	0.220266983	0.999821727	FALSE
1350	PF3D7_1001700.2o2_9009	-1.078827778	-0.987358657	0.072167518	0.091469121	0.879623535	0.999821727	FALSE
1351	PF3D7_1001900.2o2_7282	-0.186639633	-0.24002575	0.180069023	-0.053386117	0.707798865	0.999821727	FALSE
1352	PF3D7_1002100.2o2_7048	2.575125878	2.707178058	0.449853191	0.13205218	0.371374427	0.999821727	FALSE
1353	PF3D7_1002500.1o3_8986	0.102283978	0.095208784	0.007524331	-0.007075194	0.987382057	0.999821727	FALSE
1354	PF3D7_1002800.e1s2_6354	-0.557156527	-0.558921024	0.003631443	-0.001764497	0.993909968	0.999821727	FALSE
1355	PF3D7_1003100.iso1.exon3.amp1_38	-0.967038599	-0.855670809	0.608370989	0.11136779	0.245330035	0.999821727	FALSE
1356	PF3D7_1003400.iso1.exon1.amp3_seg2_2299	-0.141897359	-0.101103406	0.114338747	0.040793953	0.810815348	0.999821727	FALSE
1357	PF3D7_1003600.e1s1_8919	-0.427865866	-0.274251141	0.576667921	0.153614725	0.266744097	0.999821727	FALSE
1358	PF3D7_1003800.e1s2_7780	0.879378544	0.946809981	0.12093225	0.067431437	0.80022188	0.999821727	FALSE
1359	PF3D7_1004200.e2s2_6055	-1.41854103	-1.344192117	0.293231896	0.074348913	0.547823926	0.999821727	FALSE
1360	PF3D7_1004300.iso1.exon1.amp2_2505	-0.846895102	-0.863619862	0.06107441	-0.01672476	0.897971134	0.999821727	FALSE
1361	PF3D7_1004800.2o3_6717	-0.477329066	-0.46735995	0.086826085	0.009969117	0.8555205	0.999821727	FALSE
1362	PF3D7_1005000.1o1_7075	-0.433524958	-0.403585469	0.21964111	0.029939489	0.649060162	0.999821727	FALSE
1363	PF3D7_1005300.2o2_8452	-0.6342166	-0.675433374	0.089009292	-0.041216774	0.85194612	0.999821727	FALSE
1364	PF3D7_1005500.e2s1_9236	-0.511276529	-0.364314662	0.423971365	0.146961867	0.396797103	0.999821727	FALSE
1365	PF3D7_1005700.iso1.exon2.amp1_3583	-0.368402136	-0.261199093	0.580379232	0.107203044	0.264146288	0.999821727	FALSE
1366	PF3D7_1006000.iso1.exon2.amp1_1866	-0.047700608	-0.001846768	0.054362827	0.04585384	0.909110343	0.999821727	FALSE
1367	PF3D7_1006500.1o1_7278	0.560415694	0.666402996	0.097575506	0.105987303	0.837963798	0.999821727	FALSE
1368	PF3D7_1007000.iso1.exon8.amp1_631	-0.269984052	-0.324510087	0.22706993	-0.054526035	0.638350302	0.999821727	FALSE
1369	PF3D7_1007300.iso1.exon1.amp1_3315	0.481789613	0.790162764	0.333957378	0.308373151	0.496715252	0.999821727	FALSE
1370	PF3D7_1007700.e1s1_6640	0.222724051	0.243466801	0.101873003	0.02074275	0.830975906	0.999821727	FALSE
1371	PF3D7_1007700.e1s2_8091	3.142028072	3.244663327	0.300630084	0.102635256	0.538270544	0.999821727	FALSE
1372	PF3D7_1007800.iso1.exon1.amp1_1414	-1.010808474	-0.945621069	0.183577046	0.065187405	0.70248216	0.999821727	FALSE
1373	PF3D7_1008000.s2_8597	0.148600455	0.17968577	0.227962312	0.031085314	0.63707085	0.999821727	FALSE
1374	PF3D7_1008100.s1_7726	0.561172026	0.598971379	0.073259748	0.037799353	0.877821728	0.999821727	FALSE
1375	PF3D7_1008100.s3_5986	-0.041412833	0.064231281	0.317465441	0.105644113	0.516973979	0.999821727	FALSE
1376	PF3D7_1008200.iso1.exon1.amp1_2743	-0.649694919	-0.592219328	0.155406669	0.057475591	0.745730448	0.999821727	FALSE
1377	PF3D7_1008400.e1s1_5157	-1.17930445	-1.10853071	0.086071306	0.07077374	0.856757218	0.999821727	FALSE
1378	PF3D7_1008600.1o1_6726	-0.500196743	-0.547047633	0.244820829	-0.046850889	0.613190491	0.999821727	FALSE
1379	PF3D7_1008700.e3s1_6589	-0.589548957	-0.516075709	0.468607444	0.073473248	0.353850838	0.999821727	FALSE
1380	PF3D7_1008800.e1s1_8915	-0.70189622	-0.715422981	0.212168436	-0.013526761	0.659937656	0.999821727	FALSE
1381	PF3D7_1009000.1o1_8727	0.157190634	0.498473786	0.361559695	0.341283153	0.464158798	0.999821727	FALSE
1382	PF3D7_1009300.iso1.exon1.amp1_1604	-0.132964066	0.000964222	0.547048597	0.133928287	0.288374391	0.999821727	FALSE
1383	PF3D7_1009500.e3_5958	-0.460211145	-0.36066065	0.110742414	0.099550496	0.816614312	0.999821727	FALSE
1384	PF3D7_1009600.iso1.exon3.amp1_2459	0.219277774	0.403540319	0.305902172	0.184262545	0.531534933	0.999821727	FALSE
1385	PF3D7_1010200.iso1.exon1.amp2_1917	-0.29504879	-0.232778222	0.195285954	0.062270567	0.684886247	0.999821727	FALSE
1386	PF3D7_1010900.iso1.exon2.amp1_108	-0.354445013	-0.24097189	0.227409882	0.113473124	0.637862717	0.999821727	FALSE
1387	PF3D7_1011300.1o1_5319	-0.720486144	-0.627746527	0.639046238	0.092739617	0.226223335	0.999821727	FALSE
1388	PF3D7_1011400.1o1_6697	-0.729044849	-0.740644218	0.033212931	-0.011599369	0.944364131	0.999821727	FALSE
1389	PF3D7_1011500.1o1_7558	-0.838621795	-0.988464706	0.405125592	-0.149842911	0.416228073	0.999821727	FALSE
1390	PF3D7_1011700 (renamed)_6433	0.053454349	0.212915006	0.347292972	0.159460657	0.480774358	0.999821727	FALSE
1391	PF3D7_1011800.e1s2_7200	0.240897668	0.480409576	0.443488037	0.239511908	0.377492416	0.999821727	FALSE
1392	PF3D7_1011900.iso1.exon4.amp1_2357	-0.724275746	-0.661361217	0.357286863	0.062914529	0.469087488	0.999821727	FALSE
1393	PF3D7_1012000.iso1.exon1.amp1_2737	-0.568484624	-0.474699006	1.189904875	0.093785618	0.056348744	0.999821727	FALSE
1394	PF3D7_1012000.iso1.exon9.amp1_3295	-0.666647725	-0.629241451	0.282927889	0.037406274	0.561325492	0.999821727	FALSE
1395	PF3D7_1012100.iso1.exon1.amp1_2444	-0.866169966	-0.696539274	0.521592238	0.169630693	0.308282961	0.999821727	FALSE
1396	PF3D7_1012200.1o2_8148	0.281077976	0.253614509	0.020146928	-0.027463467	0.966226853	0.999821727	FALSE
1397	PF3D7_1012400.e3s1_5724	-0.669832235	-0.667512097	0.016440429	0.002320138	0.972436323	0.999821727	FALSE
1398	PF3D7_1012500.e1s1_9230	-0.908741648	-0.853431103	0.138636327	0.055310545	0.772040188	0.999821727	FALSE
1399	PF3D7_1012600.e1s1_9222	-1.019786134	-0.887070401	0.39815309	0.132715733	0.42361557	0.999821727	FALSE
1400	PF3D7_1012700.e1s1_7980	0.983319579	1.054635979	0.079016409	0.0713164	0.86834029	0.999821727	FALSE
1401	PF3D7_1012700.e1s2_6240	-0.397059586	-0.262510938	0.187654539	0.134548648	0.696328151	0.999821727	FALSE
1402	PF3D7_1013100.1o2_5076	-0.69084299	-0.607140525	0.172392373	0.083702464	0.71950358	0.999821727	FALSE
1403	PF3D7_1013100.2o2_4787	-0.239062179	-0.258257125	0.119965653	-0.019194947	0.80177169	0.999821727	FALSE
1404	PF3D7_1013200.iso1.exon1.amp1_4310	-0.521579987	-0.460515474	0.126989278	0.061064513	0.79053586	0.999821727	FALSE
1405	PF3D7_1013200.iso1.exon1.amp2_2506	-0.221362621	-0.176917546	0.081339994	0.044445075	0.86452072	0.999821727	FALSE
1406	PF3D7_1013400.iso1.exon9.amp1_3307	-0.513345882	-0.424116042	0.256720307	0.08922984	0.596674354	0.999821727	FALSE
1407	PF3D7_1013700.iso1.exon1.amp1_3828	-0.059684243	-0.081946115	0.096534757	-0.022261871	0.839658848	0.999821727	FALSE
1408	PF3D7_1013900.iso1.exon1.amp2_seg2_4622	-0.241418798	-0.224277831	0.028699671	0.017140967	0.951910439	0.999821727	FALSE
1409	PF3D7_1014000.iso1.exon6.amp1_1249	-0.409605773	-0.413118322	0.014731247	-0.00351255	0.975300532	0.999821727	FALSE
1410	PF3D7_1014000.iso1.exon7.amp1_955	-0.820520054	-0.762654094	0.311984634	0.05786596	0.523839179	0.999821727	FALSE
1411	PF3D7_1014100.s1_5371	1.479019682	1.76792382	0.737683373	0.288904139	0.174388152	0.999821727	FALSE
1412	PF3D7_1014100.s2_5660	1.470860825	1.495985615	0.082459332	0.02512479	0.862682311	0.999821727	FALSE
1413	PF3D7_1014300.e1s3_6628	-0.327437151	-0.236146638	0.658292698	0.091290514	0.215001228	0.999821727	FALSE
1414	PF3D7_1014500.iso1.exon1.amp2_3369	-0.698219406	-0.606483719	0.358326992	0.091735687	0.467883954	0.999821727	FALSE
1415	PF3D7_1014600 (renamed, has duplicates)_5653	-0.451836857	-0.479591202	0.042214501	-0.027754345	0.929335242	0.999821727	FALSE
1416	PF3D7_1014600.e1s2_7100	-0.00713877	0.208785692	0.329860823	0.215924463	0.501691374	0.999821727	FALSE
1417	PF3D7_1014600.e1s3_8257	0.34690062	0.394153147	0.07418774	0.047252526	0.876291562	0.999821727	FALSE
1418	PF3D7_1014800.6o11_8787	-0.686179513	-0.585982176	0.247657387	0.100197337	0.609227558	0.999821727	FALSE
1419	PF3D7_1014800.7o11_8498	-0.472433848	-0.46362111	0.065186649	0.008812738	0.891159878	0.999821727	FALSE
1420	PF3D7_1014900.iso1.exon1.amp1_3710	-0.534613577	-0.435003819	0.325371235	0.099609758	0.507187561	0.999821727	FALSE
1421	PF3D7_1015100.1o1_9044	0.359712605	0.200715641	0.105887977	-0.158996963	0.824464423	0.999821727	FALSE
1422	PF3D7_1015200.iso1.exon3.amp1_1792	-0.779282165	-0.74432435	0.215741535	0.034957815	0.654723596	0.999821727	FALSE
1423	PF3D7_1015500.1o1_8772	-0.140895443	0.010891	0.081508067	0.151786443	0.86424461	0.999821727	FALSE
1424	PF3D7_1015900.e2s1_5752	0.024666947	0.089128048	0.174513198	0.064461101	0.716260423	0.999821727	FALSE
1425	PF3D7_1016000.iso1.exon1.amp1_1018	-0.818027841	-0.81768403	0.002207428	0.000343811	0.99629805	0.999821727	FALSE
1426	PF3D7_1016200.1o1_8491	0.709879459	0.741723139	0.105537259	0.03184368	0.825032547	0.999821727	FALSE
1427	PF3D7_1016300.e1s1_5130	-0.266493272	-0.337774442	0.152233734	-0.07128117	0.750677663	0.999821727	FALSE
1428	PF3D7_1016500.e1s1_7472	-0.09543491	0.003809189	0.370441871	0.099244099	0.454043612	0.999821727	FALSE
1429	PF3D7_1016500.e2s1_8376	-0.619459806	-0.518269825	0.328287632	0.101189981	0.503612216	0.999821727	FALSE
1430	PF3D7_1016700.iso1.exon2.amp1_3820	-0.701802389	-0.703926848	0.006816138	-0.002124459	0.988569542	0.999821727	FALSE
1431	PF3D7_1016900.e1s1_4855	-0.635980531	-0.608264844	0.066566725	0.027715687	0.888876513	0.999821727	FALSE
1432	PF3D7_1017000.e1s1_7482	-0.270046121	-0.27625391	0.006345416	-0.006207788	0.989358859	0.999821727	FALSE
1433	PF3D7_1017000.e1s2_7193	0.093403522	0.184910212	0.222333476	0.09150669	0.645166608	0.999821727	FALSE
1434	PF3D7_1017100.1o1_6988	0.455600333	0.393508399	0.074388761	-0.062091934	0.875960184	0.999821727	FALSE
1435	PF3D7_1017300.1.2o2_6764	-0.224308379	-0.180594255	0.368824361	0.043714124	0.455872553	0.999821727	FALSE
1436	PF3D7_1017800.iso1.exon3.amp1_1681	-0.310272831	-0.281498194	0.078061149	0.028774637	0.869911841	0.999821727	FALSE
1437	PF3D7_1017800.iso1.exon3.amp2_1970	-0.69019371	-0.634915121	0.396886516	0.055278589	0.424969085	0.999821727	FALSE
1438	PF3D7_1017900.e2s1_5746	-0.716001687	-0.744547107	0.228735077	-0.028545421	0.635964131	0.999821727	FALSE
1439	PF3D7_1018000.1o1_8202	-0.759663744	-0.810940701	0.244695707	-0.051276958	0.613365668	0.999821727	FALSE
1440	PF3D7_1018100.1o1_6997	-0.503176306	-0.434878343	0.376764602	0.068297962	0.446950409	0.999821727	FALSE
1441	PF3D7_1018300.e1s1_5945	-0.140403206	-0.027772027	0.151145943	0.112631179	0.752377096	0.999821727	FALSE
1442	PF3D7_1018300.e2s2_5481	-0.853021663	-0.819974718	0.09560243	0.033046945	0.841178209	0.999821727	FALSE
1443	PF3D7_1019000.e1s1_6639	-0.257125668	-0.250784304	0.048065011	0.006341364	0.919585922	0.999821727	FALSE
1444	PF3D7_1019000.e1s2_6350	-0.521741414	-0.562255232	0.226264674	-0.040513818	0.639506146	0.999821727	FALSE
1445	PF3D7_1019300.iso1.exon1.amp2_1043	-0.085569442	-0.040375395	0.218609415	0.045194047	0.650555752	0.999821727	FALSE
1446	PF3D7_1019400.e2s1_9178	-0.685501463	-0.753803517	0.463808893	-0.068302054	0.358263557	0.999821727	FALSE
1447	PF3D7_1019500.1.6o25_6176	-0.234274316	0.055710342	0.388124479	0.289984659	0.434430093	0.999821727	FALSE
1448	PF3D7_1019500.1.9o25_6465	-0.822117215	-0.77760451	0.487697699	0.044512705	0.336772211	0.999821727	FALSE
1449	PF3D7_1020200.e2s1_4857	-0.309159921	-0.261715233	0.382807729	0.047444688	0.440254183	0.999821727	FALSE
1450	PF3D7_1020200.e3s1_5754	-0.467084667	-0.573424527	0.90006632	-0.106339861	0.114457834	0.999821727	FALSE
1451	PF3D7_1020300.e1s1_7784	0.659935249	0.698150869	0.069430556	0.03821562	0.884142434	0.999821727	FALSE
1452	PF3D7_1020500.1o1_4727	-0.145249244	-0.215085026	0.564684574	-0.069835783	0.275301306	0.999821727	FALSE
1453	PF3D7_1020700.e1s1_7201	-0.535771149	-0.451253352	0.14444774	0.084517797	0.762878616	0.999821727	FALSE
1454	PF3D7_1020700.e1s2_8363	-0.068323715	-0.106446424	0.051697201	-0.038122709	0.913541681	0.999821727	FALSE
1455	PF3D7_1020800.11o11_6470	-0.635000798	-0.648999863	0.033396958	-0.013999066	0.944056575	0.999821727	FALSE
1456	PF3D7_1021000.iso1.exon2.amp1_3284	-0.743763073	-0.599718144	1.299827022	0.144044929	0.043831431	0.999821727	FALSE
1457	PF3D7_1021000.iso1.exon4.amp1_1510	0.042339218	0.158136951	0.217108623	0.115797734	0.652734918	0.999821727	FALSE
1458	PF3D7_1021200.1o1_6485	0.741575314	0.727728971	0.043701726	-0.013846343	0.926855417	0.999821727	FALSE
1459	PF3D7_1021500.iso1.exon1.amp1_154	-0.279601174	0.026038793	0.55476285	0.305639966	0.282584884	0.999821727	FALSE
1460	PF3D7_1021600.e1s1_6028	-0.297871274	-0.237750829	0.248152831	0.060120444	0.60853703	0.999821727	FALSE
1461	PF3D7_1021700.e1s2_6931	0.02858831	0.003795136	0.035307275	-0.024793174	0.940864663	0.999821727	FALSE
1462	PF3D7_1021700.e1s3_8087	-0.639914179	-0.521005036	0.604521785	0.118909142	0.247837551	0.999821727	FALSE
1463	PF3D7_1021700.e2s2_7510	-0.063830348	-0.004570286	0.137468153	0.059260062	0.773887293	0.999821727	FALSE
1464	PF3D7_1021700.e3s1_8324	0.359526479	0.328484082	0.039889498	-0.031042396	0.933213926	0.999821727	FALSE
1465	PF3D7_1021800.iso1.exon2.amp1_3703	0.79169038	1.017460077	1.515686762	0.225769696	0.027550878	0.999821727	FALSE
1466	PF3D7_1021900.e1s2_5472	0.914153982	0.746279355	0.288379802	-0.167874627	0.554153457	0.999821727	FALSE
1467	PF3D7_1021900.e1s3_6056	-0.02786763	0.179262276	0.196256525	0.207129906	0.683438257	0.999821727	FALSE
1468	PF3D7_1022000.e2_4806	2.005937149	1.81420819	0.156529783	-0.191728959	0.743982827	0.999821727	FALSE
1469	PF3D7_1022200.e2s1_5154	-0.169762893	-0.105023963	0.491059147	0.064738929	0.33384303	0.999821727	FALSE
1470	PF3D7_1022300.2o6_4974	-0.053030848	-0.12660371	0.660366694	-0.073572861	0.213825892	0.999821727	FALSE
1471	PF3D7_1022700.1o1_7854	-0.580732359	-0.502298336	0.327024621	0.078434023	0.505158293	0.999821727	FALSE
1472	PF3D7_1023100.e1s3_6525	-0.335110364	-0.405166778	0.055513	-0.070056414	0.907199518	0.999821727	FALSE
1473	PF3D7_1023100.e1s4_6236	0.157098492	0.20542014	0.106657786	0.048321649	0.823217877	0.999821727	FALSE
1474	PF3D7_1023100.e1s6_5941	0.672549329	0.929780887	0.283222621	0.257231558	0.560936152	0.999821727	FALSE
1475	PF3D7_1023200.1o1_6706	-0.423918657	-0.396184114	0.058889486	0.027734544	0.901594483	0.999821727	FALSE
1476	PF3D7_1023900.s3_8307	-0.12261258	-0.003743971	0.232992283	0.118868609	0.629887778	0.999821727	FALSE
1477	PF3D7_1024000.iso1.exon1.amp1_1314	-0.413590906	-0.337044895	0.577384073	0.07654601	0.266240897	0.999821727	FALSE
1478	PF3D7_1024300.1o1_7540	-0.275359803	-0.160030898	0.278612816	0.115328905	0.567046782	0.999821727	FALSE
1479	PF3D7_1024400.1o2_7617	-0.924466578	-0.778426162	0.621190126	0.146040416	0.23715812	0.999821727	FALSE
1480	PF3D7_1024800.e2s2_5767	0.688916458	0.681141054	0.017503243	-0.007775404	0.970655532	0.999821727	FALSE
1481	PF3D7_1026500.iso1.exon1.amp1_1214	-0.488487304	-0.563408763	0.229674588	-0.074921459	0.634620151	0.999821727	FALSE
1482	PF3D7_1026900.1o1_7582	-1.014097562	-0.847489789	0.961052121	0.166607773	0.098094041	0.999821727	FALSE
1483	PF3D7_1027000.iso1.exon1.amp2_seg1_3452	-0.727029763	-0.638426152	0.553296774	0.088603611	0.283676597	0.999821727	FALSE
1484	PF3D7_1027400.iso1.exon1.amp1_87	-0.425953971	-0.470020853	0.339684739	-0.044066882	0.489820554	0.999821727	FALSE
1485	PF3D7_1028000.iso1.exon2.amp1_1224	-0.612539018	-0.506519072	0.641416942	0.106019947	0.224809891	0.999821727	FALSE
1486	PF3D7_1028300.e1s1_5740	-0.62359673	-0.576911886	0.205220663	0.046684844	0.670143104	0.999821727	FALSE
1487	PF3D7_1028700.1o1_8478	1.617736807	1.711489993	0.087243885	0.093753187	0.854836144	0.999821727	FALSE
1488	PF3D7_1028900.2o2_7542	-0.479509159	-0.463293651	0.072925881	0.016215508	0.8783724	0.999821727	FALSE
1489	PF3D7_1029400.1o1_7611	-0.299818755	-0.28341527	0.060836062	0.016403485	0.898366252	0.999821727	FALSE
1490	PF3D7_1029500.1o1_4650	-0.397139596	-0.406674836	0.053158857	-0.00953524	0.91111134	0.999821727	FALSE
1491	PF3D7_1030200.1o1_4717	0.641755044	1.316705442	0.728742415	0.674950398	0.178536245	0.999821727	FALSE
1492	PF3D7_1030400.2o2_6704	-0.76803683	-0.78801419	0.070838317	-0.01997736	0.881817452	0.999821727	FALSE
1493	PF3D7_1030500.1o1_4988	-0.702960257	-0.777710979	0.350069909	-0.074750722	0.477504672	0.999821727	FALSE
1494	PF3D7_1030700.iso1.exon1.amp1_391	-0.117321712	-0.104577325	0.016818577	0.012744387	0.971802697	0.999821727	FALSE
1495	PF3D7_1030800.1o1_5237	0.184971375	0.125993117	0.168775468	-0.058978258	0.725051005	0.999821727	FALSE
1496	PF3D7_1031500.iso1.exon1.amp1_1891	-0.638180593	-0.65139919	0.046710265	-0.013218597	0.921842034	0.999821727	FALSE
1497	PF3D7_1031500.iso1.exon4.amp1_656	-0.613287844	-0.678692316	0.515600524	-0.065404472	0.313151953	0.999821727	FALSE
1498	PF3D7_1031800.iso1.exon1.amp1_698	-0.200423675	-0.135474598	0.99352124	0.064949077	0.090453108	0.999821727	FALSE
1499	PF3D7_1032100.iso1.exon1.amp1_3724	-0.335339699	-0.182535227	0.792130137	0.152804472	0.151217778	0.999821727	FALSE
1500	PF3D7_1032100.iso1.exon1.amp2_4232	-0.113115179	-0.010969589	0.765084703	0.102145591	0.162292163	0.999821727	FALSE
1501	PF3D7_1032400.3o7_4720	0.434235206	0.470071826	0.037015891	0.035836619	0.938010906	0.999821727	FALSE
1502	PF3D7_1032900.e1s1_8259	-0.302200368	-0.30647534	0.011543017	-0.004274972	0.980644459	0.999821727	FALSE
1503	PF3D7_1033700.e3s1_8911	-0.554153002	-0.617871147	1.127055528	-0.063718146	0.065344742	0.999821727	FALSE
1504	PF3D7_1033800.8o8_9037	-0.20924392	-0.14499688	0.816630693	0.06424704	0.141878036	0.999821727	FALSE
1505	PF3D7_1034100.iso1.exon2.amp1_2074	-0.358096432	-0.429360594	0.188925862	-0.071264162	0.694415121	0.999821727	FALSE
1506	PF3D7_1034500.iso1.exon2.amp2_seg1_573	-0.607401988	-0.666649947	0.087362237	-0.059247959	0.854642312	0.999821727	FALSE
1507	PF3D7_1034700.1o1_4662	-0.580792383	-0.751728018	0.916948373	-0.170935635	0.109645608	0.999821727	FALSE
1508	PF3D7_1034900.e1s1_8260	-0.620186746	-0.484746292	0.227400312	0.135440453	0.637876439	0.999821727	FALSE
1509	PF3D7_1035000.1o1_8245	-0.051191658	-0.159649053	0.147400609	-0.108457395	0.758241284	0.999821727	FALSE
1510	PF3D7_1035100.1o1_8208	1.423138807	1.30358665	0.098543154	-0.119552157	0.836388758	0.999821727	FALSE
1511	PF3D7_1035200.1o1_4741	-0.04825178	-0.038144067	0.024577756	0.010107713	0.958807766	0.999821727	FALSE
1512	PF3D7_1035300.iso1.exon1.amp1_2847	0.585498337	0.801263488	1.119135	0.21576515	0.066591146	0.999821727	FALSE
1513	PF3D7_1035300.iso1.exon1.amp2_3364	0.136117143	0.303402777	0.537927946	0.167285635	0.295364252	0.999821727	FALSE
1514	PF3D7_1035600.1o1_6162	-0.424502446	-0.593726424	0.282637777	-0.169223979	0.56170891	0.999821727	FALSE
1515	PF3D7_1035700.e1s1_8948	0.850181786	0.906474613	0.123407998	0.056292827	0.796257436	0.999821727	FALSE
1516	PF3D7_1035800.1o1_5041	0.638630689	0.628595982	0.023676963	-0.010034706	0.960315697	0.999821727	FALSE
1517	PF3D7_1035900.1o1_5890	2.330120646	2.920325645	0.450071788	0.590205	0.371165863	0.999821727	FALSE
1518	PF3D7_1036000.1o1_5293	1.065680496	1.07763324	0.022654868	0.011952744	0.962026931	0.999821727	FALSE
1519	PF3D7_1036300.1o1_6786	-0.177517621	-0.077467946	0.096928592	0.100049674	0.839017292	0.999821727	FALSE
1520	PF3D7_1036400.1o2_6117	1.400009851	1.696766445	0.326497147	0.296756594	0.505805028	0.999821727	FALSE
1521	PF3D7_1036400.e2s2_6540	0.011866104	0.142438309	0.113784501	0.130572205	0.811708107	0.999821727	FALSE
1522	PF3D7_1036500.1o1_6762	1.007976821	1.138139848	0.381003143	0.130163027	0.442245274	0.999821727	FALSE
1523	PF3D7_1036600.iso1.exon3.amp1_3273	-1.083671307	-0.965703964	0.515972055	0.117967344	0.312847978	0.999821727	FALSE
1524	PF3D7_1036600.iso2.exon3.amp1_3851	0.071039408	0.106255207	0.03676981	0.0352158	0.938421845	0.999821727	FALSE
1525	PF3D7_1036900.e1s2_5948	0.259965449	0.385544096	0.265745498	0.125578647	0.584339868	0.999821727	FALSE
1526	PF3D7_1036900.e2s1_6576	-0.788974989	-0.763882171	0.312504242	0.025092817	0.5231855	0.999821727	FALSE
1527	PF3D7_1037000.iso1.exon3.amp1_4275	0.736608146	0.905322026	0.14339074	0.16871388	0.764541523	0.999821727	FALSE
1528	PF3D7_1037000.iso1.exon3.amp2_4564	0.136271164	0.203823563	0.052716109	0.067552399	0.911847387	0.999821727	FALSE
1529	PF3D7_1037100.1o1_9098	-0.308726572	-0.128078048	0.623286978	0.180648524	0.235847288	0.999821727	FALSE
1530	PF3D7_1037200.10o12_7895	-0.459978455	-0.396986065	0.418525892	0.06299239	0.402331506	0.999821727	FALSE
1531	PF3D7_1037600.e2s1_7184	0.21419497	0.174142819	0.043818123	-0.040052151	0.926661377	0.999821727	FALSE
1532	PF3D7_1037600.e3s1_6616	-0.526539399	-0.434202814	0.159462856	0.092336585	0.739427627	0.999821727	FALSE
1533	PF3D7_1038400.e1s1_8544	0.475732716	0.420869448	0.157258638	-0.054863269	0.742849688	0.999821727	FALSE
1534	PF3D7_1038400.e3s1_7460	0.123143715	0.25176916	0.106334771	0.128625445	0.823740857	0.999821727	FALSE
1535	PF3D7_1038400.e7s1_7389	0.607047683	0.643657594	0.122930273	0.03660991	0.797021849	0.999821727	FALSE
1536	PF3D7_1038500.2o2_4992	-0.001276424	-0.013869403	0.017125756	-0.012592979	0.971288004	0.999821727	FALSE
1537	PF3D7_1038600.2o2_8191	-0.61702163	-0.530876919	0.187109163	0.086144712	0.697149647	0.999821727	FALSE
1538	PF3D7_1038900.e1s1_9213	-0.698663816	-0.765461095	0.060171486	-0.066797279	0.899468131	0.999821727	FALSE
1539	PF3D7_1039700.iso1.exon1.amp1_1851	0.559519138	0.655351529	0.09295534	0.09583239	0.845496555	0.999821727	FALSE
1540	PF3D7_1039900.iso1.exon2.amp1_3588	-0.501960645	-0.514446485	0.016341721	-0.01248584	0.972601722	0.999821727	FALSE
1541	PF3D7_1040000.iso1.exon2.amp1_1585	0.260825692	0.444069011	0.096057565	0.183243319	0.840436396	0.999821727	FALSE
1542	PF3D7_1040100.iso1.exon2.amp1_3299	1.375148125	1.462266732	0.150576506	0.087118607	0.753267393	0.999821727	FALSE
1543	PF3D7_1040200.iso1.exon2.amp1_408	0.773438863	0.900331425	0.10080656	0.126892562	0.832708252	0.999821727	FALSE
1544	PF3D7_1040300.iso1.exon2.amp1_997	1.424961397	1.489861884	0.069406287	0.064900487	0.884182528	0.999821727	FALSE
1545	PF3D7_1040400.iso1.exon2.amp1_2156	0.4321056	0.430655512	0.001161748	-0.001450088	0.998051692	0.999821727	FALSE
1546	PF3D7_1040500.iso1.exon2.amp1_2735	0.303167758	0.315991224	0.05962747	0.012823465	0.900370325	0.999821727	FALSE
1547	PF3D7_1040600.iso1.exon2.amp1_2150	0.57897314	0.436655465	0.127765565	-0.142317675	0.789297721	0.999821727	FALSE
1548	PF3D7_1040700.iso1.exon2.amp1_419	0.101819572	0.182678067	0.090638622	0.080858495	0.849281349	0.999821727	FALSE
1549	PF3D7_1040900.iso1.exon2.amp1_2143	1.233422662	1.347001901	1.079641995	0.113579239	0.073224813	0.999821727	FALSE
1550	PF3D7_1041000.iso1.exon2.amp1_1280	0.698640083	0.856140513	0.38291595	0.15750043	0.440135008	0.999821727	FALSE
1551	PF3D7_1041100.iso1.exon2.amp1_3013	0.938476397	1.143736457	0.259185493	0.20526006	0.593288646	0.999821727	FALSE
1552	PF3D7_1041200.iso1.exon2.amp1_2153	0.76378502	0.842988319	0.379746327	0.079203299	0.443636269	0.999821727	FALSE
1553	PF3D7_1041300.iso1.exon1.amp1_1293	1.668100879	1.7767694	0.978883413	0.108668521	0.093812456	0.999821727	FALSE
1554	PF3D7_1041300.iso1.exon2.amp1_498	0.187414101	0.08135008	0.183553887	-0.106064021	0.702517193	0.999821727	FALSE
1555	PF3D7_1041300.iso1.exon2.amp2_787	-0.57713243	-0.705428347	0.125191961	-0.128295917	0.79340535	0.999821727	FALSE
1556	PF3D7_1100100.iso1.exon1.amp1_4545	-0.452232684	-0.250017269	0.527481683	0.202215415	0.303565738	0.999821727	FALSE
1557	PF3D7_1100100.iso1.exon2.amp1_1582	1.401131616	1.478332641	0.381912336	0.077201025	0.441241209	0.999821727	FALSE
1558	PF3D7_1100200.e1s1_7391	-0.283259919	-0.148175283	0.516348976	0.135084636	0.312539873	0.999821727	FALSE
1559	PF3D7_1100200.e1s2_8548	-0.138815067	-0.136002389	0.018553116	0.002812679	0.96889663	0.999821727	FALSE
1560	PF3D7_1100200.e1s3_7392	0.139271997	0.192028686	0.176923043	0.052756689	0.71258406	0.999821727	FALSE
1561	PF3D7_1100300.iso1.exon2.amp1_4474	1.289786973	1.520620871	0.314342851	0.230833898	0.52087723	0.999821727	FALSE
1562	PF3D7_1100400.iso1.exon2.amp1_3590	0.243501944	0.441978251	0.100954302	0.198476307	0.832468189	0.999821727	FALSE
1563	PF3D7_1100500.iso1.exon1.amp1_699	0.144662897	0.06042664	0.13998314	-0.084236257	0.769912888	0.999821727	FALSE
1564	PF3D7_1100800.2o2_4959	-0.202211586	-0.348823631	1.044924406	-0.146612045	0.079681018	0.999821727	FALSE
1565	PF3D7_1101100.iso1.exon1.amp1_3897	0.530427124	0.618072671	0.477090766	0.087645548	0.346167862	0.999821727	FALSE
1566	PF3D7_1101200.iso1.exon1.amp1_3319	1.371168349	1.541962037	0.122023979	0.170793688	0.798472776	0.999821727	FALSE
1567	PF3D7_1101300.iso1.exon1.amp1_2434	0.50924612	0.576667803	0.122043209	0.067421683	0.79844198	0.999821727	FALSE
1568	PF3D7_1101500.iso1.exon1.amp1_3877	-0.63355055	-0.583465967	0.083239502	0.050084583	0.861401576	0.999821727	FALSE
1569	PF3D7_1101700.iso1.exon2.amp1_2140	0.987418267	1.123182726	0.121806342	0.135764459	0.798821347	0.999821727	FALSE
1570	PF3D7_1102200.iso1.exon1.amp1_2170	-0.692716879	-0.387970153	0.753782894	0.304746726	0.167170882	0.999821727	FALSE
1571	PF3D7_1102400.1o1_6766	-0.424719629	-0.39997971	0.114656356	0.024739919	0.810303913	0.999821727	FALSE
1572	PF3D7_1102500.e2s1_5459	1.319352825	1.480257326	0.09952846	0.160904501	0.83478593	0.999821727	FALSE
1573	PF3D7_1102700.iso1.exon1.amp1_375	0.156181102	0.100527443	0.089196677	-0.055653659	0.851639529	0.999821727	FALSE
1574	PF3D7_1102800.iso1.exon1.amp1_671	2.111590212	2.153433636	0.037451921	0.041843423	0.93728282	0.999821727	FALSE
1575	PF3D7_1103000.iso1.exon1.amp1_1212	-0.554930671	-0.585548294	0.216129589	-0.030617623	0.654158748	0.999821727	FALSE
1576	PF3D7_1103100.e2s1_8572	-0.423321478	-0.633545164	0.892905036	-0.210223686	0.116568748	0.999821727	FALSE
1577	PF3D7_1103500.13o13_6965	-0.231248478	-0.080340949	0.254272696	0.150907528	0.600048187	0.999821727	FALSE
1578	PF3D7_1103500.1o13_8994	-0.036757909	0.051512169	0.071980629	0.088270078	0.879931926	0.999821727	FALSE
1579	PF3D7_1103500.1o2_7831	0.759207268	0.777321837	0.016892643	0.018114569	0.971678595	0.999821727	FALSE
1580	PF3D7_1103800.e1s1_7393	1.482484834	1.700733061	0.285487375	0.218248227	0.557950578	0.999821727	FALSE
1581	PF3D7_1104000.1o3_6466	-0.811507393	-0.838015184	0.234441213	-0.02650779	0.627827711	0.999821727	FALSE
1582	PF3D7_1104100.4o4_7289	-0.120848094	-0.312699256	0.480415935	-0.191851162	0.343197353	0.999821727	FALSE
1583	PF3D7_1104200.e1s2_5379	-0.075612326	-0.084252587	0.048954837	-0.008640261	0.918104556	0.999821727	FALSE
1584	PF3D7_1104800.2o9_8185	-1.17034628	-1.192208154	0.262423133	-0.021861874	0.588860965	0.999821727	FALSE
1585	PF3D7_1105200.iso1.exon3.amp1_951	-0.663510558	-0.666841556	0.01717359	-0.003330998	0.97120786	0.999821727	FALSE
1586	PF3D7_1105600.e1s1_6922	-0.021359276	0.13999778	0.204711665	0.161357056	0.670894195	0.999821727	FALSE
1587	PF3D7_1105900.iso1.exon1.amp1_1541	-0.879104783	-0.980699224	0.840280116	-0.101594442	0.133447143	0.999821727	FALSE
1588	PF3D7_1106100.iso1.exon4.amp1_381	-0.587054311	-0.582342946	0.039604672	0.004711365	0.933689243	0.999821727	FALSE
1589	PF3D7_1106300.2o6_8231	0.280849101	0.360445698	0.064720409	0.079596598	0.891931571	0.999821727	FALSE
1590	PF3D7_1106700.iso1.exon1.amp2_772	-0.976299998	-0.91975724	0.4281231	0.056542758	0.392621131	0.999821727	FALSE
1591	PF3D7_1107400.iso1.exon1.amp1_3598	0.490692062	0.576304435	0.08351674	0.085612373	0.860946582	0.999821727	FALSE
1592	PF3D7_1107500.iso1.exon5.amp1_2058	-0.349775713	-0.391134271	0.129071472	-0.041358558	0.787216567	0.999821727	FALSE
1593	PF3D7_1107600.iso1.exon1.amp1_seg2_2908	-0.53352864	-0.552993844	0.136426967	-0.019465204	0.775535133	0.999821727	FALSE
1594	PF3D7_1107600.iso1.exon1.amp2_3661	-0.164278358	-0.068671611	0.19681878	0.095606747	0.682600182	0.999821727	FALSE
1595	PF3D7_1107800.e2s1_7678	-0.373561591	-0.51441634	0.160902683	-0.140854749	0.737196212	0.999821727	FALSE
1596	PF3D7_1107900.iso1.exon1.amp1_542	-0.284488138	-0.381083214	0.10274745	-0.096595076	0.829556306	0.999821727	FALSE
1597	PF3D7_1108100.iso1.exon1.amp1_2831	-0.846505184	-0.760158621	0.536416605	0.086346563	0.296537822	0.999821727	FALSE
1598	PF3D7_1108600.e1s1_6906	-0.240829733	-0.432532243	0.281336492	-0.19170251	0.563430911	0.999821727	FALSE
1599	PF3D7_1109200.3o4_6218	0.445117605	0.740745105	0.29722835	0.295627499	0.542648577	0.999821727	FALSE
1600	PF3D7_1110200.e1s1_4895	1.001279708	1.238748366	0.129072752	0.237468658	0.787214529	0.999821727	FALSE
1601	PF3D7_1110200.e1s2_6629	-0.51674814	-0.283869283	0.379577766	0.232878857	0.443823094	0.999821727	FALSE
1602	PF3D7_1110200.e2s1_6580	-0.379543618	-0.386208122	0.092266573	-0.006664504	0.846621264	0.999821727	FALSE
1603	PF3D7_1110400.e3s2_7791	-0.787811285	-0.594353684	0.410826474	0.193457601	0.410267724	0.999821727	FALSE
1604	PF3D7_1110700.e2s1_5162	-0.675675843	-0.700302869	0.181130289	-0.024627026	0.706188281	0.999821727	FALSE
1605	PF3D7_1111000.1o1_6758	-0.326699	-0.280642136	0.222095373	0.046056864	0.645510389	0.999821727	FALSE
1606	PF3D7_1111300.1o1_8154	0.488859436	0.463748833	0.056073692	-0.025110603	0.906268295	0.999821727	FALSE
1607	PF3D7_1111400.iso1.exon1.amp1_2422	-0.582241919	-0.612155907	0.056363462	-0.029913988	0.905787103	0.999821727	FALSE
1608	PF3D7_1111600.iso1.exon1.amp1_437	-0.021600952	0.091824995	0.21760202	0.113425947	0.652018036	0.999821727	FALSE
1609	PF3D7_1111800.iso1.exon1.amp1_2132	-0.911570086	-1.02799925	0.273728043	-0.116429165	0.573570869	0.999821727	FALSE
1610	PF3D7_1111800.iso1.exon2.amp1_2710	0.454037936	0.528417953	0.373188692	0.074380018	0.450951115	0.999821727	FALSE
1611	PF3D7_1111900.iso1.exon1.amp1_693	0.513426145	0.58966529	0.278755689	0.076239145	0.566856718	0.999821727	FALSE
1612	PF3D7_1112100.iso1.exon1.amp1_1397	-0.455805732	-0.442727939	0.028734111	0.013077792	0.95185283	0.999821727	FALSE
1613	PF3D7_1112100.iso1.exon1.amp2_1686	-0.571886311	-0.542146649	0.167370093	0.029739662	0.727212039	0.999821727	FALSE
1614	PF3D7_1112100.iso1.exon1.amp3_2210	-0.576732937	-0.512582096	0.209404598	0.064150841	0.663986891	0.999821727	FALSE
1615	PF3D7_1112400.1o1_4663	-0.599784444	-0.780247598	0.551821911	-0.180463154	0.284778901	0.999821727	FALSE
1616	PF3D7_1113000.iso1.exon2.amp1_1889	-0.836724829	-0.857235849	0.309526052	-0.020511019	0.526940142	0.999821727	FALSE
1617	PF3D7_1113000.iso1.exon3.amp1_1542	-0.323110593	-0.257310612	0.058112402	0.065799981	0.902883859	0.999821727	FALSE
1618	PF3D7_1113000.iso1.exon5.amp1_118	-1.020920263	-0.943162314	0.266843139	0.077757949	0.58285121	0.999821727	FALSE
1619	PF3D7_1113000.iso1.exon7.amp3_1351	0.29802616	0.438469042	0.24020232	0.140442882	0.619677235	0.999821727	FALSE
1620	PF3D7_1113700.e1s1_8346	0.648682095	0.637984456	0.010166378	-0.010697639	0.982952302	0.999821727	FALSE
1621	PF3D7_1114500.iso1.exon1.amp1_3323	-0.336956468	-0.297551432	0.059574876	0.039405035	0.900457556	0.999821727	FALSE
1622	PF3D7_1114700.e1_8271	-0.211501795	-0.393051956	0.391119145	-0.181550161	0.431177351	0.999821727	FALSE
1623	PF3D7_1114900.e1s1_7681	-0.503090614	-0.491496404	0.086756635	0.01159421	0.855634273	0.999821727	FALSE
1624	PF3D7_1114900.e1s2_9122	-0.666714432	-0.713989023	0.230296235	-0.04727459	0.633731813	0.999821727	FALSE
1625	PF3D7_1115200.2o7_7060	-0.616630092	-0.762052624	0.319334492	-0.145422532	0.514647901	0.999821727	FALSE
1626	PF3D7_1115300.e1s1_7187	-0.320180562	-0.033079409	0.314001739	0.287101153	0.521304917	0.999821727	FALSE
1627	PF3D7_1115400.e1s1_6025	0.668734499	0.912270252	0.178609195	0.243535753	0.710017329	0.999821727	FALSE
1628	PF3D7_1115600.e3s1_6879	-0.291552129	-0.217437659	0.46892719	0.07411447	0.353558523	0.999821727	FALSE
1629	PF3D7_1115700.e1s1_7476	-0.65461161	-0.524305992	0.416277913	0.130305618	0.404635154	0.999821727	FALSE
1630	PF3D7_1116000.iso1.exon2.amp1_3093	0.91106953	1.02482484	0.047980115	0.11375531	0.919727277	0.999821727	FALSE
1631	PF3D7_1116000.iso1.exon2.amp2_3382	0.684251858	0.877602931	0.081343388	0.193351073	0.864515144	0.999821727	FALSE
1632	PF3D7_1116800.e4s1_7224	-0.460397903	-0.342230411	0.241745621	0.118167492	0.617504949	0.999821727	FALSE
1633	PF3D7_1117000.iso1.exon6.amp1_3500	-0.609563236	-0.530409378	0.133609331	0.079153858	0.78000163	0.999821727	FALSE
1634	PF3D7_1117200.iso1.exon2.amp1_1104	-0.689714864	-0.756156246	0.298540757	-0.066441381	0.540956543	0.999821727	FALSE
1635	PF3D7_1117800.iso1.exon1.amp1_264	0.06815132	0.110524076	0.24368663	0.042372757	0.614779563	0.999821727	FALSE
1636	PF3D7_1117900.iso1.exon1.amp1_2246	-0.114437997	-0.053002254	0.239153981	0.061435742	0.621155514	0.999821727	FALSE
1637	PF3D7_1118100.iso1.exon1.amp1_3510	-0.857377916	-0.775651463	0.512750064	0.081726452	0.315493208	0.999821727	FALSE
1638	PF3D7_1118100.iso1.exon2.amp1_2116	-0.337598589	-0.407495274	0.53471832	-0.069896685	0.297861784	0.999821727	FALSE
1639	PF3D7_1118200.e1s1_7968	0.947158935	1.111509128	0.831141207	0.164350193	0.136639406	0.999821727	FALSE
1640	PF3D7_1118300.e1s1_7205	-0.517837914	-0.098019228	0.470389044	0.419818686	0.352224821	0.999821727	FALSE
1641	PF3D7_1118800.2o7_5861	-0.87445406	-0.812349224	0.291525224	0.062104836	0.550044513	0.999821727	FALSE
1642	PF3D7_1119400.iso1.exon1.amp3_2783	0.05030445	-0.035915405	0.338588802	-0.086219855	0.491134229	0.999821727	FALSE
1643	PF3D7_1119500.iso1.exon1.amp1_3300	-0.752262059	-0.689681279	0.289178808	0.06258078	0.553107687	0.999821727	FALSE
1644	PF3D7_1119500.iso1.exon3.amp1_3827	-0.357395296	-0.380170528	0.146872627	-0.022775232	0.759069559	0.999821727	FALSE
1645	PF3D7_1119700.iso1.exon1.amp1_1569	-0.386752274	-0.298874982	0.424627272	0.087877292	0.396134864	0.999821727	FALSE
1646	PF3D7_1119900.iso1.exon1.amp1_3728	-0.362212082	-0.230724772	0.595577274	0.131487311	0.253761817	0.999821727	FALSE
1647	PF3D7_1120300.2o2_8189	0.012830359	0.203655037	0.251846404	0.190824678	0.60340464	0.999821727	FALSE
1648	PF3D7_1120400.iso1.exon2.amp1_1793	-0.183317283	-0.1197439	0.233904088	0.063573383	0.628590912	0.999821727	FALSE
1649	PF3D7_1120700.iso1.exon1.amp2_3653	-0.24167317	-0.293173099	0.071054056	-0.051499929	0.881461274	0.999821727	FALSE
1650	PF3D7_1120800.iso1.exon1.amp1_4126	-0.742238027	-0.717426456	0.22929856	0.024811572	0.635157859	0.999821727	FALSE
1651	PF3D7_1121200.iso1.exon1.amp1_653	-0.174998342	-0.240713965	0.203259274	-0.065715623	0.673039936	0.999821727	FALSE
1652	PF3D7_1121600.iso1.exon2.amp1_2679	0.999594268	1.400620788	0.303811689	0.40102652	0.534198507	0.999821727	FALSE
1653	PF3D7_1121700.e1s1_5657	-0.382842635	-0.118125712	0.624268902	0.264716923	0.235235917	0.999821727	FALSE
1654	PF3D7_1121800.s1_7974	2.241623094	2.392881541	0.213947009	0.151258448	0.657339321	0.999821727	FALSE
1655	PF3D7_1122000.iso1.exon1.amp1_4471	-0.594754395	-0.589976591	0.010192779	0.004777804	0.98290804	0.999821727	FALSE
1656	PF3D7_1122500.iso1.exon1.amp1_3721	-0.712111217	-0.588704516	1.102793201	0.1234067	0.069249443	0.999821727	FALSE
1657	PF3D7_1122500.iso1.exon1.amp2_4229	-0.358873393	-0.432980614	0.157796727	-0.074107221	0.742013634	0.999821727	FALSE
1658	PF3D7_1122600.2o2_5848	0.019178313	-0.014000114	0.048728444	-0.033178427	0.918481413	0.999821727	FALSE
1659	PF3D7_1122800.e1s1_6545	0.850157296	0.914290824	0.102648391	0.064133528	0.829717081	0.999821727	FALSE
1660	PF3D7_1122900.e1s1_9126	-0.768191716	-0.738546799	0.018887397	0.029644917	0.968336636	0.999821727	FALSE
1661	PF3D7_1122900.e2s2_7971	-0.32309315	-0.28222336	0.068575879	0.040869789	0.885554664	0.999821727	FALSE
1662	PF3D7_1122900.e2s3_6815	-0.207495588	-0.221134274	0.030101059	-0.013638686	0.949566577	0.999821727	FALSE
1663	PF3D7_1122900.e2s5_7132	1.236436092	1.387415213	0.714834397	0.15097912	0.185193887	0.999821727	FALSE
1664	PF3D7_1123000.iso1.exon1.amp3_1921	-0.194839507	-0.202567371	0.029814114	-0.007727865	0.950046453	0.999821727	FALSE
1665	PF3D7_1123200.iso1.exon1.amp1_3335	1.195333177	1.241377674	0.156527921	0.046044496	0.743985723	0.999821727	FALSE
1666	PF3D7_1123400.e1_5091	-0.371067459	-0.491831902	0.340696385	-0.120764443	0.488610286	0.999821727	FALSE
1667	PF3D7_1123500.iso1.exon1.amp1_4580	0.236128595	0.288210079	0.091382105	0.052081484	0.848066188	0.999821727	FALSE
1668	PF3D7_1124000.1o5_7896	-0.165055847	-0.208214186	0.061489127	-0.043158339	0.897283728	0.999821727	FALSE
1669	PF3D7_1124000.2o5_7607	-0.532594135	-0.427378785	0.393377026	0.105215349	0.428738067	0.999821727	FALSE
1670	PF3D7_1124100.iso1.exon1.amp1_1988	0.162564326	0.230636302	0.059216067	0.068071975	0.901052713	0.999821727	FALSE
1671	PF3D7_1124300.1o3_7324	-0.10463592	-0.018553971	0.130727282	0.08608195	0.784580879	0.999821727	FALSE
1672	PF3D7_1124400.iso1.exon1.amp1_1806	-0.393880698	-0.350391593	0.149441219	0.043489104	0.755043763	0.999821727	FALSE
1673	PF3D7_1124500.1o1_7615	0.688794534	0.546159644	0.308094345	-0.14263489	0.528752011	0.999821727	FALSE
1674	PF3D7_1124600.e1s1_5168	-0.423224193	-0.289014363	0.151689787	0.134209831	0.751527247	0.999821727	FALSE
1675	PF3D7_1124700.e1s1_6312	-0.435011807	-0.409301212	0.077099191	0.025710595	0.871495145	0.999821727	FALSE
1676	PF3D7_1125300.iso1.exon1.amp1_2856	-0.095877053	-0.044900097	0.040388258	0.050976956	0.932381678	0.999821727	FALSE
1677	PF3D7_1125300.iso1.exon1.amp2_3352	0.181293521	0.121532381	0.034550363	-0.059761141	0.942129216	0.999821727	FALSE
1678	PF3D7_1125400.2o2_5277	-0.558430577	-0.564765922	0.035894198	-0.006335345	0.939884252	0.999821727	FALSE
1679	PF3D7_1125700.6o6_7634	-0.19188379	-0.157305531	0.036475457	0.034578259	0.938913427	0.999821727	FALSE
1680	PF3D7_1125800.1o4_6747	0.932157755	0.845703206	0.241703472	-0.086454549	0.617564214	0.999821727	FALSE
1681	PF3D7_1125800.3o4_6458	-0.591617267	-0.564572646	0.055868339	0.027044621	0.906609334	0.999821727	FALSE
1682	PF3D7_1126000.e1s2_8344	-0.296548946	-0.266712405	0.120348484	0.02983654	0.801157738	0.999821727	FALSE
1683	PF3D7_1126100.iso1.exon2.amp2_220	-0.253514078	-0.249589173	0.006212791	0.003924905	0.989581251	0.999821727	FALSE
1684	PF3D7_1126300.e2_7985	-0.45422452	-0.415433121	0.121990902	0.038791398	0.798525749	0.999821727	FALSE
1685	PF3D7_1126400.2o3_5535	0.901768678	0.990266722	0.101437603	0.088498045	0.831683036	0.999821727	FALSE
1686	PF3D7_1126500.iso1.exon1.amp1_2267	-0.190378898	-0.126312961	0.328352897	0.064065937	0.50353242	0.999821727	FALSE
1687	PF3D7_1127000.e6s1_6000	-0.517100044	-0.407753734	0.236509356	0.10934631	0.624894342	0.999821727	FALSE
1688	PF3D7_1127300.1o1_7293	-0.803817082	-0.658939472	0.436365618	0.14487761	0.384441729	0.999821727	FALSE
1689	PF3D7_1127400.iso1.exon1.amp1_2346	-1.246151334	-1.154771279	0.624122276	0.091380054	0.23532711	0.999821727	FALSE
1690	PF3D7_1127400.iso1.exon2.amp1_2078	-0.609561962	-0.565067674	0.288579617	0.044494288	0.553891803	0.999821727	FALSE
1691	PF3D7_1127600.iso1.exon2.amp1_349	0.171842757	0.11528331	0.384374512	-0.056559447	0.438531354	0.999821727	FALSE
1692	PF3D7_1127700.1o3_4715	0.447932007	0.490870479	0.194636813	0.042938473	0.685855612	0.999821727	FALSE
1693	PF3D7_1127900.3o3_6444	0.411543909	0.525715055	0.075328148	0.114171146	0.874412038	0.999821727	FALSE
1694	PF3D7_1128100.2o3_7845	0.398697956	0.327710594	0.060343289	-0.070987362	0.899183253	0.999821727	FALSE
1695	PF3D7_1128300.e1s1_8069	-0.16787857	-0.081721563	0.274912941	0.086157006	0.571983713	0.999821727	FALSE
1696	PF3D7_1128300.e3s1_8903	-0.408528488	-0.473134227	0.155812742	-0.064605739	0.745098365	0.999821727	FALSE
1697	PF3D7_1128500.1o1_8799	-0.278711998	-0.173371323	0.33683678	0.105340676	0.493239877	0.999821727	FALSE
1698	PF3D7_1129000.e1s1_6583	-0.581414811	-0.625077424	0.572618333	-0.043662614	0.269606832	0.999821727	FALSE
1699	PF3D7_1129100.e1s1_6319	0.006465826	-0.188133578	0.192418561	-0.194599404	0.689173645	0.999821727	FALSE
1700	PF3D7_1129200.2o4_7594	-0.671786376	-0.671571916	0.000810284	0.00021446	0.998641114	0.999821727	FALSE
1701	PF3D7_1129500.iso1.exon1.amp1_4492	0.104844413	0.061960723	0.117711161	-0.04288369	0.805390743	0.999821727	FALSE
1702	PF3D7_1129600.e1s1_8953	-0.755055656	-0.484272719	0.423246775	0.270782937	0.397529783	0.999821727	FALSE
1703	PF3D7_1129700.iso1.exon1.amp1_1271	-0.173933253	-0.168153521	0.027296212	0.005779732	0.954258355	0.999821727	FALSE
1704	PF3D7_1129800.1o1_9026	-0.173847172	-0.106701972	0.328305307	0.0671452	0.503590605	0.999821727	FALSE
1705	PF3D7_1130200_5980	0.970520852	1.216791788	0.149059394	0.246270937	0.755641613	0.999821727	FALSE
1706	PF3D7_1130400_8004	0.426382653	0.495705751	0.144157849	0.069323098	0.763334528	0.999821727	FALSE
1707	PF3D7_1131200.iso1.exon1.amp1_62	-0.746000531	-0.650480966	0.489483524	0.095519565	0.33521315	0.999821727	FALSE
1708	PF3D7_1131200.iso1.exon6.amp1_345	-0.746121132	-0.717018292	0.282894772	0.02910284	0.561369251	0.999821727	FALSE
1709	PF3D7_1131600.s2_8288	-0.005187236	0.046371183	0.156210508	0.051558419	0.744479446	0.999821727	FALSE
1710	PF3D7_1131800.iso1.exon1.amp1_838	-0.854013882	-0.829422983	0.179631019	0.0245909	0.708464122	0.999821727	FALSE
1711	PF3D7_1132300.1o1_5547	0.553553465	0.510861295	0.048741143	-0.04269217	0.918460274	0.999821727	FALSE
1712	PF3D7_1132900.1o1_6392	0.19848217	0.362623587	0.185931195	0.164141417	0.698925725	0.999821727	FALSE
1713	PF3D7_1133200.e1s2_5075	0.145325097	0.132532685	0.02967232	-0.012792412	0.950283593	0.999821727	FALSE
1714	PF3D7_1133400_6235	1.751702767	2.676629616	0.853456912	0.924926849	0.128985368	0.999821727	FALSE
1715	PF3D7_1133500.iso1.exon1.amp1_1264	-0.819562779	-0.656346635	0.519488797	0.163216144	0.309984204	0.999821727	FALSE
1716	PF3D7_1133500.iso1.exon2.amp1_4149	0.184957747	0.278148545	0.073322796	0.093190797	0.877717748	0.999821727	FALSE
1717	PF3D7_1133700.iso1.exon1.amp1_970	0.206274136	-0.010436015	0.53658472	-0.216710152	0.296407063	0.999821727	FALSE
1718	PF3D7_1133800.iso1.exon1.amp1_1320	-0.604861253	-0.597000764	0.015362303	0.007860489	0.974242967	0.999821727	FALSE
1719	PF3D7_1133900.iso1.exon2.amp2_3355	-0.711562867	-0.734862812	0.038213023	-0.023299944	0.936012104	0.999821727	FALSE
1720	PF3D7_1134000.e1s1_6336	1.663016696	1.565439882	0.229032056	-0.097576814	0.635539116	0.999821727	FALSE
1721	PF3D7_1134200.s1_7422	-0.085191769	-0.099048035	0.015324378	-0.013856266	0.974306521	0.999821727	FALSE
1722	PF3D7_1134300.iso1.exon1.amp1_4294	-0.639213565	-0.585144329	0.171239525	0.054069236	0.721269517	0.999821727	FALSE
1723	PF3D7_1134300.iso1.exon1.amp2_4583	0.088933771	0.11348039	0.55564396	0.024546619	0.28193069	0.999821727	FALSE
1724	PF3D7_1134300.iso1.exon1.amp3_4228	-0.082054744	0.05178262	0.403150424	0.133837363	0.418309879	0.999821727	FALSE
1725	PF3D7_1134500.s1_5988	-0.601171801	-0.473522277	0.220571965	0.127649524	0.647712467	0.999821727	FALSE
1726	PF3D7_1134500.s2_6572	-1.055193187	-1.009336774	0.149625896	0.045856413	0.754754676	0.999821727	FALSE
1727	PF3D7_1134700.e1_5101	-0.892501011	-0.826976402	0.150003997	0.065524609	0.754162962	0.999821727	FALSE
1728	PF3D7_1134700.e2s1_6257	-0.027217281	0.074366806	0.159105486	0.101584087	0.739981953	0.999821727	FALSE
1729	PF3D7_1134700.e2s2_6835	0.818175739	0.961145566	0.168618137	0.142969826	0.725292779	0.999821727	FALSE
1730	PF3D7_1135100.1o1_6774	-0.035459824	0.083157355	0.201694243	0.11861718	0.675356308	0.999821727	FALSE
1731	PF3D7_1135400.e1s1_5738	-0.706171283	-0.638144609	0.383047296	0.068026675	0.439990402	0.999821727	FALSE
1732	PF3D7_1136100.1o1_5019	0.140031726	0.368030796	0.446801845	0.22799907	0.374296429	0.999821727	FALSE
1733	PF3D7_1136200.1o5_8797	-0.218548389	-0.241614798	0.060467701	-0.023066409	0.898976967	0.999821727	FALSE
1734	PF3D7_1136200.5o5_9080	0.487368975	0.484422141	0.020037328	-0.002946833	0.966410426	0.999821727	FALSE
1735	PF3D7_1136300.e2s1_5389	0.349203482	0.274115215	0.221085248	-0.075088268	0.64697003	0.999821727	FALSE
1736	PF3D7_1136500.1.e4s1_8282	-0.50675356	-0.560195995	0.360332727	-0.053442435	0.465569931	0.999821727	FALSE
1737	PF3D7_1136600.iso1.exon1.amp1_4586	-0.720665881	-0.703767933	0.025764529	0.016897948	0.956821423	0.999821727	FALSE
1738	PF3D7_1136700.iso1.exon7.amp1_117	-0.654289918	-0.5830322	0.354420919	0.071257718	0.472416157	0.999821727	FALSE
1739	PF3D7_1136900.e1s1_7134	0.397193569	0.426634236	0.168192938	0.029440667	0.725946384	0.999821727	FALSE
1740	PF3D7_1136900.e2s1_4885	-0.460162412	-0.411637121	0.129059176	0.048525291	0.787236153	0.999821727	FALSE
1741	PF3D7_1137100_7714	-0.290535012	-0.226372004	0.054461351	0.064163008	0.908946632	0.999821727	FALSE
1742	PF3D7_1137300.1o1_6196	-0.579768258	-0.647620011	0.44652988	-0.067851753	0.374557835	0.999821727	FALSE
1743	PF3D7_1137600 (renamed)_7629	0.10570875	0.026050469	0.088544237	-0.079658281	0.852707159	0.999821727	FALSE
1744	PF3D7_1137600.1o2_7251	-0.451441124	-0.56959848	1.320580329	-0.118157356	0.041848229	0.999821727	FALSE
1745	PF3D7_1137900.1o2_5315	0.031304847	0.141458159	0.566475986	0.110153312	0.274005508	0.999821727	FALSE
1746	PF3D7_1137900.2o2_4737	0.139547494	0.219466998	0.115774579	0.079919504	0.808504185	0.999821727	FALSE
1747	PF3D7_1138000.iso1.exon1.amp3_4227	-0.152309762	-0.133648809	0.160118669	0.018660953	0.738410876	0.999821727	FALSE
1748	PF3D7_1138100.1o1_8413	-0.664922641	-0.669764872	0.010064344	-0.004842231	0.983123362	0.999821727	FALSE
1749	PF3D7_1138400.e1s2_7418	-0.54802404	-0.628978147	0.16748787	-0.080954107	0.727030817	0.999821727	FALSE
1750	PF3D7_1138400.e1s3_5106	0.221937266	0.27571926	0.059158235	0.053781995	0.901148646	0.999821727	FALSE
1751	PF3D7_1138400.e1s4_8575	0.000660022	0.03994046	0.062422345	0.039280438	0.895737292	0.999821727	FALSE
1752	PF3D7_1138400.e1s5_8576	0.198048202	0.285879732	0.125082794	0.08783153	0.793579768	0.999821727	FALSE
1753	PF3D7_1138800.3o7_5545	-0.323854481	-0.269085432	0.073367536	0.054769049	0.877643964	0.999821727	FALSE
1754	PF3D7_1139100.iso1.exon1.amp2_3640	-0.279794367	-0.254613391	0.085381085	0.025180976	0.857888592	0.999821727	FALSE
1755	PF3D7_1139200.iso1.exon2.amp1_3587	-0.581941962	-0.41300007	0.543718785	0.168941891	0.290907982	0.999821727	FALSE
1756	PF3D7_1139300.e2s1_8655	0.260943433	0.377049812	0.693563569	0.116106379	0.195876638	0.999821727	FALSE
1757	PF3D7_1139300.e2s3_8649	1.218211519	1.352421716	0.181568788	0.134210197	0.705523355	0.999821727	FALSE
1758	PF3D7_1139500.1.e1s1_5751	0.207585286	0.178794576	0.049913091	-0.02879071	0.916509723	0.999821727	FALSE
1759	PF3D7_1140000.2o2_8125	-0.544819435	-0.532601486	0.016562378	0.012217949	0.972231981	0.999821727	FALSE
1760	PF3D7_1140100 (renamed)_5564	0.924441413	1.032501252	0.063405641	0.108059839	0.894108476	0.999821727	FALSE
1761	PF3D7_1140500.e1s1_7204	-0.682602707	-0.662232867	0.036175227	0.02036984	0.939414859	0.999821727	FALSE
1762	PF3D7_1140900.3o6_8819	-0.767919499	-0.637456101	0.373770683	0.130463398	0.450298045	0.999821727	FALSE
1763	PF3D7_1140900.5o6_9108	-0.155457532	-0.104341854	0.094658135	0.051115679	0.842717924	0.999821727	FALSE
1764	PF3D7_1141200.iso1.exon1.amp1_2920	-0.550012024	-0.561735221	0.1529786	-0.011723196	0.74951496	0.999821727	FALSE
1765	PF3D7_1141400.5o5_5552	-0.647643546	-0.615267236	0.211979471	0.03237631	0.660214059	0.999821727	FALSE
1766	PF3D7_1141900.1o1_6461	-0.274854259	-0.345633719	1.19375001	-0.07077946	0.055846308	0.999821727	FALSE
1767	PF3D7_1142800_7136	-0.237904584	-0.182808172	0.065272078	0.055096412	0.891018496	0.999821727	FALSE
1768	PF3D7_1142900.e2_6836	-0.500860819	-0.192304825	0.603536806	0.308555994	0.248483237	0.999821727	FALSE
1769	PF3D7_1143000.iso1.exon1.amp1_3893	-0.798562653	-0.510360248	1.027467367	0.288202405	0.083168684	0.999821727	FALSE
1770	PF3D7_1143100.iso1.exon1.amp2_1039	0.003130333	-0.059275668	0.114173298	-0.062406001	0.81108181	0.999821727	FALSE
1771	PF3D7_1143300.1o1_4684	-0.385363039	-0.617618957	0.397488619	-0.232255918	0.424325208	0.999821727	FALSE
1772	PF3D7_1143900.iso1.exon2.amp1_1547	-0.548422872	-0.545683578	0.008516901	0.002739294	0.985717802	0.999821727	FALSE
1773	PF3D7_1144200.iso1.exon2.amp1_2141	-0.461750598	-0.290252856	0.448470598	0.171497743	0.372695939	0.999821727	FALSE
1774	PF3D7_1144500.1o1_6422	-0.802028822	-0.713687536	0.354727546	0.088341286	0.472059148	0.999821727	FALSE
1775	PF3D7_1144600.iso1.exon1.amp1_3019	-0.345040689	-0.315136523	0.128658895	0.029904166	0.787873838	0.999821727	FALSE
1776	PF3D7_1145200.iso1.exon1.amp1_1399	-0.610480575	-0.510670795	0.598059484	0.099809779	0.252104005	0.999821727	FALSE
1777	PF3D7_1145200.iso1.exon1.amp3_2211	-0.320786529	-0.266644488	0.206573087	0.054142041	0.668149696	0.999821727	FALSE
1778	PF3D7_1145400.e1s1_8368	0.040659426	0.083374835	0.074505465	0.042715409	0.875767814	0.999821727	FALSE
1779	PF3D7_1145500.2o2_8228	-0.870872596	-0.993388079	0.734457073	-0.122515483	0.175873261	0.999821727	FALSE
1780	PF3D7_1145900.iso1.exon2.amp1_376	-0.104651194	-0.21926349	0.148052547	-0.114612296	0.757219095	0.999821727	FALSE
1781	PF3D7_1146000.1o1_8205	0.483604932	0.41202364	0.065727625	-0.071581293	0.890264668	0.999821727	FALSE
1782	PF3D7_1146500.1o1_8151	-0.561392633	-0.670334156	1.147037262	-0.108941523	0.062317105	0.999821727	FALSE
1783	PF3D7_1146700.iso1.exon1.amp1_3331	-0.264466434	-0.140700842	0.199344581	0.123765592	0.678842161	0.999821727	FALSE
1784	PF3D7_1146800.e3s1_4831	0.025396826	-0.001308336	0.066379452	-0.026705162	0.889186284	0.999821727	FALSE
1785	PF3D7_1147200.iso1.exon1.amp3_4233	-0.60248618	-0.596843739	0.015182271	0.005642442	0.974544668	0.999821727	FALSE
1786	PF3D7_1147800.1.e2s1_5119	-0.34158947	-0.317440451	0.09075675	0.024149019	0.849088245	0.999821727	FALSE
1787	PF3D7_1147800.iso2.exon1.amp1_325	-0.559339124	-0.448608713	0.277582218	0.110730411	0.568419063	0.999821727	FALSE
1788	PF3D7_1148900.iso1.exon1.amp1_1825	-0.16420392	-0.19625167	0.023190755	-0.032047749	0.961129695	0.999821727	FALSE
1789	PF3D7_1149000.e1s1_5748	0.28934878	0.272481737	0.041484873	-0.016867043	0.930552194	0.999821727	FALSE
1790	PF3D7_1149000.s4 (renamed)_8579	0.86326314	0.719825305	0.232809539	-0.143437835	0.630147891	0.999821727	FALSE
1791	PF3D7_1149000.s6 (renamed)_7423	-0.678797035	-0.65352988	0.016731758	0.025267155	0.971948169	0.999821727	FALSE
1792	PF3D7_1149100.iso2.exon1.amp1_4097	-0.529901949	-0.545400764	0.055300405	-0.015498815	0.907552653	0.999821727	FALSE
1793	PF3D7_1149100.iso2.exon2.amp1_3610	-0.585766554	-0.594963267	0.050890981	-0.009196713	0.914882699	0.999821727	FALSE
1794	PF3D7_1149200.e2s1_6829	0.652121961	0.575588884	0.248585553	-0.076533077	0.607934322	0.999821727	FALSE
1795	PF3D7_1149200.e2s2_6546	-0.364504413	-0.428606334	0.040861711	-0.06410192	0.931591753	0.999821727	FALSE
1796	PF3D7_1149500.3o4_7655	-0.392538353	-0.344626355	0.083449348	0.047911997	0.861057178	0.999821727	FALSE
1797	PF3D7_1149500.e2_6825	0.160519281	0.11231238	0.084131676	-0.048206901	0.859937605	0.999821727	FALSE
1798	PF3D7_1149900.iso1.exon2.amp1_4166	0.774853535	0.804049495	0.024399794	0.02919596	0.959105658	0.999821727	FALSE
1799	PF3D7_1150000.iso1.exon2.amp1_3314	0.272734889	0.300459462	0.023920227	0.027724573	0.959908451	0.999821727	FALSE
1800	PF3D7_1150200.iso1.exon1.amp1_412	0.408169838	0.462622531	0.219061319	0.054452692	0.649900407	0.999821727	FALSE
1801	PF3D7_1150300.iso1.exon1.amp1_2740	-0.621781968	-0.408445824	0.368926448	0.213336145	0.455756948	0.999821727	FALSE
1802	PF3D7_1150400.iso1.exon2.amp1_714	0.998070655	1.071606095	0.105500712	0.07353544	0.825091757	0.999821727	FALSE
1803	PF3D7_1200100.iso1.exon1.amp2_794	-0.104723071	0.018861607	0.595016534	0.123584677	0.254137795	0.999821727	FALSE
1804	PF3D7_1200200.iso1.exon1.amp1_2148	0.401741606	0.422162152	0.01724274	0.020420546	0.971091998	0.999821727	FALSE
1805	PF3D7_1200300.e2s1_7189	1.4699407	1.512757525	0.050695173	0.042816825	0.915208446	0.999821727	FALSE
1806	PF3D7_1200400.iso1.exon1.amp2_776	-0.354283886	-0.257093466	0.087688662	0.09719042	0.854107769	0.999821727	FALSE
1807	PF3D7_1200400.iso1.exon2.amp1_720	1.483652833	1.575089988	0.140324662	0.091437155	0.769373839	0.999821727	FALSE
1808	PF3D7_1200500.iso1.exon1.amp1_2436	0.096032368	0.313476894	0.990949905	0.217444526	0.091033365	0.999821727	FALSE
1809	PF3D7_1200600.iso1.exon2.amp3_2805	-0.498670968	-0.267053131	0.412407868	0.231617837	0.408627052	0.999821727	FALSE
1810	PF3D7_1200800.iso1.exon2.amp1_4209	-0.404325893	-0.34001197	0.078093157	0.064313922	0.869859171	0.999821727	FALSE
1811	PF3D7_1201200.2o2_4660	0.22485434	0.292327387	0.032506528	0.067473048	0.945544817	0.999821727	FALSE
1812	PF3D7_1201300.1o1_7539	-0.201196927	-0.031228387	0.473636559	0.16996854	0.349278023	0.999821727	FALSE
1813	PF3D7_1201300_8869	-0.396764705	-0.221074267	1.20918381	0.175690438	0.053880905	0.999821727	FALSE
1814	PF3D7_1201400.iso1.exon1.amp1_218	1.691598386	1.804764013	0.466990169	0.113165627	0.355332655	0.999821727	FALSE
1815	PF3D7_1201400.iso1.exon1.amp2_2193	0.684765752	0.673933794	0.014757616	-0.010831959	0.975256339	0.999821727	FALSE
1816	PF3D7_1202200_6847	-0.707097588	-0.666799797	0.048416137	0.040297791	0.919001327	0.999821727	FALSE
1817	PF3D7_1202300.e14s1_9188	-0.837989706	-0.873039686	0.252016955	-0.035049979	0.603168315	0.999821727	FALSE
1818	PF3D7_1202300.e31s1_7502	-0.083460326	0.174600244	0.459420643	0.25806057	0.362341538	0.999821727	FALSE
1819	PF3D7_1202300.e33s1_5173	0.132363329	0.247182947	0.224379345	0.114819619	0.642217135	0.999821727	FALSE
1820	PF3D7_1202300.e34s1_6594	-0.605473165	-0.558908187	0.297236739	0.046564978	0.542637749	0.999821727	FALSE
1821	PF3D7_1202600.e1_8857	0.179567824	0.217776012	0.191549239	0.038208187	0.690476279	0.999821727	FALSE
1822	PF3D7_1203700.e3_8270	0.361381916	0.428875561	0.057535471	0.067493644	0.903841365	0.999821727	FALSE
1823	PF3D7_1203900 (renamed)_7587	0.021405619	0.158262548	0.270434308	0.136856928	0.57799824	0.999821727	FALSE
1824	PF3D7_1204300_6840	-0.029721857	-0.015835062	0.016358232	0.013886796	0.972574056	0.999821727	FALSE
1825	PF3D7_1205100.iso1.exon1.amp1_152	-0.360208925	-0.378743495	0.106481668	-0.01853457	0.823503008	0.999821727	FALSE
1826	PF3D7_1205400.iso1.exon1.amp2_488	-0.463648359	-0.373448576	0.281348204	0.090199783	0.563415396	0.999821727	FALSE
1827	PF3D7_1205500.e1s1_6267	-0.586285131	-0.620569137	0.102571872	-0.034284006	0.829841282	0.999821727	FALSE
1828	PF3D7_1205500.e1s2_5111	-0.678756041	-0.792772264	0.353055731	-0.114016223	0.474008205	0.999821727	FALSE
1829	PF3D7_1205800.3o4_5646	-0.767628999	-0.807889794	0.19771019	-0.040260795	0.681272617	0.999821727	FALSE
1830	PF3D7_1206000.1o1_7583	-0.831858522	-0.679807823	0.479666545	0.152050699	0.343864809	0.999821727	FALSE
1831	PF3D7_1206100.e2s1_6587	0.117489479	0.299015712	0.10844768	0.181526233	0.820321958	0.999821727	FALSE
1832	PF3D7_1206600.iso1.exon1.amp1_261	-0.594532368	-0.487205116	0.311866104	0.107327252	0.523988376	0.999821727	FALSE
1833	PF3D7_1206900 (renamed, has duplicates)_7621	-0.104669934	-0.076231399	0.082799735	0.028438535	0.862123439	0.999821727	FALSE
1834	PF3D7_1206900.4o4_7049	1.093074903	1.261245429	0.12709603	0.168170526	0.79036555	0.999821727	FALSE
1835	PF3D7_1207000.e3s1_7223	-0.258234597	-0.230605645	0.068672515	0.027628952	0.88539496	0.999821727	FALSE
1836	PF3D7_1207200.iso1.exon1.amp3_2782	-0.513104026	-0.435230118	0.250927036	0.077873908	0.604679573	0.999821727	FALSE
1837	PF3D7_1207400.2o2_8755	-0.247117467	-0.163128527	0.047021548	0.08398894	0.921323562	0.999821727	FALSE
1838	PF3D7_1207500.e3s1_6870	-0.646759406	-0.658565203	0.122365548	-0.011805797	0.797925826	0.999821727	FALSE
1839	PF3D7_1207600.1o1_4730	0.024541962	-0.06172033	0.164011388	-0.086262292	0.732389101	0.999821727	FALSE
1840	PF3D7_1208000.iso1.exon1.amp1_342	-0.347065155	-0.396198133	0.034169824	-0.049132978	0.942765052	0.999821727	FALSE
1841	PF3D7_1208100 (renamed, has duplicates)_7883	-0.756585096	-0.649999017	1.011512902	0.106586079	0.086506971	0.999821727	FALSE
1842	PF3D7_1208100.e2s1_5771	-0.335380251	-0.217493892	1.081489957	0.117886358	0.072898142	0.999821727	FALSE
1843	PF3D7_1208100.e2s2_5482	-0.605046533	-0.578460906	0.089070568	0.026585627	0.851845859	0.999821727	FALSE
1844	PF3D7_1208500.iso1.exon1.amp2_seg1_1423	-0.597400011	-0.439644029	2.023315253	0.157755982	0.01062365	0.999821727	FALSE
1845	PF3D7_1208800.e1s1_6623	0.415060395	0.396382984	0.020695905	-0.018677411	0.965307389	0.999821727	FALSE
1846	PF3D7_1208900.s1_5377	0.007758852	-0.028028665	0.025676292	-0.035787516	0.956969095	0.999821727	FALSE
1847	PF3D7_1209400.e1s1_8090	0.07151839	0.123147175	0.033402329	0.051628785	0.9440476	0.999821727	FALSE
1848	PF3D7_1209500.1.3o3_5905	-0.716775411	-0.625642342	0.269479446	0.09113307	0.579285983	0.999821727	FALSE
1849	PF3D7_1209500.iso2.exon2.amp1_3320	-0.428028293	-0.361172492	0.461028461	0.0668558	0.360842667	0.999821727	FALSE
1850	PF3D7_1209900.1o1_8507	-0.793335584	-0.747613789	0.245626985	0.045721795	0.612062582	0.999821727	FALSE
1851	PF3D7_1210100.1o1_7277	-0.357788716	-0.226661596	0.187614592	0.131127119	0.696388305	0.999821727	FALSE
1852	PF3D7_1210600.iso1.exon1.amp1_4021	0.157376925	0.100233434	0.062681801	-0.057143492	0.895307445	0.999821727	FALSE
1853	PF3D7_1210600.iso1.exon1.amp2_4535	-0.536722921	-0.540624679	0.00587583	-0.003901759	0.990146288	0.999821727	FALSE
1854	PF3D7_1211000.e3s1_5406	-0.608091179	-0.583179834	0.120443046	0.024911345	0.801006115	0.999821727	FALSE
1855	PF3D7_1211000.e3s2_8300	0.656152107	0.476557494	0.169814785	-0.179594614	0.723454843	0.999821727	FALSE
1856	PF3D7_1211300.e2s1_4865	-0.549144948	-0.546208821	0.020560567	0.002936127	0.965534056	0.999821727	FALSE
1857	PF3D7_1211600.iso1.exon1.amp2_2832	-0.687265129	-0.640703849	0.14331485	0.04656128	0.764660976	0.999821727	FALSE
1858	PF3D7_1211900.e1s1_5489	0.502127767	0.450361443	0.28244989	-0.051766325	0.56195732	0.999821727	FALSE
1859	PF3D7_1211900.e2s1_8064	-0.811145929	-0.656655556	0.22825142	0.154490373	0.636656669	0.999821727	FALSE
1860	PF3D7_1212000 (renamed)_7876	-0.329317569	-0.36794227	0.235636603	-0.038624701	0.626131201	0.999821727	FALSE
1861	PF3D7_1212000.e2s1_5966	-0.689128986	-0.710721909	0.110618729	-0.021592924	0.816814006	0.999821727	FALSE
1862	PF3D7_1212400.1o1_5266	-0.823193334	-0.858286864	0.570906224	-0.03509353	0.270826039	0.999821727	FALSE
1863	PF3D7_1212500.1o1_4735	-0.601697036	-0.462560202	0.396470341	0.139136834	0.425414604	0.999821727	FALSE
1864	PF3D7_1212700.s1_9130	-0.39845476	-0.48332689	0.160423999	-0.08487213	0.737937722	0.999821727	FALSE
1865	PF3D7_1212800_6558	0.023539522	0.09007921	0.183255864	0.066539688	0.70296809	0.999821727	FALSE
1866	PF3D7_1212900.e1s1_8355	-0.02661898	0.160708632	0.24885692	0.187327612	0.607556548	0.999821727	FALSE
1867	PF3D7_1213400.e1s1_8061	-0.234327871	-0.22895727	0.033107593	0.0053706	0.944540183	0.999821727	FALSE
1868	PF3D7_1213500.1o2_5618	-0.898057821	-0.727484556	0.461020064	0.170573265	0.360850481	0.999821727	FALSE
1869	PF3D7_1214000.iso1.exon2.amp1_2096	-0.501887244	-0.395676229	0.727778599	0.106211015	0.178989497	0.999821727	FALSE
1870	PF3D7_1215100.e1s1_8868	-0.255886309	0.114405837	0.592423003	0.370292146	0.255883849	0.999821727	FALSE
1871	PF3D7_1215200.iso1.exon1.amp1_1558	0.276824333	0.2758718	0.00104996	-0.000952534	0.998239165	0.999821727	FALSE
1872	PF3D7_1215400.1o1_8489	-0.634073464	-0.705208333	0.132468967	-0.071134869	0.781812263	0.999821727	FALSE
1873	PF3D7_1215900.1o1_5893	-0.535751673	-0.426755099	0.190770491	0.108996574	0.691644294	0.999821727	FALSE
1874	PF3D7_1216300.iso1.exon1.amp1_2121	-0.743888296	-0.715512796	0.253084957	0.0283755	0.601689775	0.999821727	FALSE
1875	PF3D7_1216500.e1s1_7177	-0.066589268	0.057046927	0.24947789	0.123636195	0.606692641	0.999821727	FALSE
1876	PF3D7_1216600_6846	1.001268872	1.094743906	0.301536463	0.093475034	0.537108262	0.999821727	FALSE
1877	PF3D7_1216900.e1s1_6556	-0.704920084	-0.761363032	0.188567301	-0.056442947	0.69495439	0.999821727	FALSE
1878	PF3D7_1217900.3o3_5875	-0.108828878	-0.068080545	0.033515484	0.040748333	0.943858495	0.999821727	FALSE
1879	PF3D7_1218200.e1s2_6823	-0.040812222	0.047562605	0.342063489	0.088374827	0.486978384	0.999821727	FALSE
1880	PF3D7_1218500.e3s1_4808	-0.660703707	-0.680071277	0.040379734	-0.019367571	0.9323959	0.999821727	FALSE
1881	PF3D7_1218600.e2s1_6329	-0.29942501	-0.412754756	0.32691367	-0.113329746	0.505294278	0.999821727	FALSE
1882	PF3D7_1219000.iso1.exon1.amp1_seg1_4603	0.352586728	0.35933688	0.019750489	0.006750153	0.966890875	0.999821727	FALSE
1883	PF3D7_1219100.e1s1_9152	-0.700446691	-0.571339562	0.493449486	0.129107129	0.331774155	0.999821727	FALSE
1884	PF3D7_1219100.e1s2_9153	-0.307905432	-0.255660148	0.107362186	0.052245284	0.822077798	0.999821727	FALSE
1885	PF3D7_1219300.iso1.exon1.amp1_4486	0.818229522	0.925173632	0.251891897	0.10694411	0.603341596	0.999821727	FALSE
1886	PF3D7_1219600.iso1.exon3.amp1_2541	0.194238134	0.299645732	0.30497383	0.105407598	0.5327166	0.999821727	FALSE
1887	PF3D7_1219600.iso1.exon3.amp2_2830	0.588008912	0.839907948	0.642605356	0.251899035	0.224104674	0.999821727	FALSE
1888	PF3D7_1219700.e1s1_6308	-0.905282034	-0.79682371	0.245180959	0.108458324	0.612686466	0.999821727	FALSE
1889	PF3D7_1219800.iso1.exon1.amp1_616	-0.87359268	-0.786568439	0.657022239	0.087024241	0.215724419	0.999821727	FALSE
1890	PF3D7_1219900.1o1_5820	-0.54957179	-0.488174124	0.119039585	0.061397666	0.803257552	0.999821727	FALSE
1891	PF3D7_1220100.1o1_7044	-0.072355067	-0.044464647	0.034742583	0.02789042	0.941808061	0.999821727	FALSE
1892	PF3D7_1220300.iso1.exon1.amp1_2695	-0.127490969	-0.112515335	0.046321252	0.014975634	0.922490038	0.999821727	FALSE
1893	PF3D7_1220600.2o4_7295	-0.424252418	-0.394266484	0.098340411	0.029985934	0.836718687	0.999821727	FALSE
1894	PF3D7_1221000.e1s1_8662	-0.093452986	-0.203000842	0.19243139	-0.109547856	0.689154431	0.999821727	FALSE
1895	PF3D7_1221000.e1s3_4910	0.527552077	0.761130114	0.182979104	0.233578037	0.703386951	0.999821727	FALSE
1896	PF3D7_1221300.iso1.exon6.amp1_1262	0.74094268	0.72774949	0.012364585	-0.013193191	0.979267262	0.999821727	FALSE
1897	PF3D7_1221400.e1s1_6610	0.089061514	0.147505021	0.170244559	0.058443507	0.722795301	0.999821727	FALSE
1898	PF3D7_1221500.1o1_6483	-0.79355521	-0.745599013	0.336266117	0.047956197	0.493927193	0.999821727	FALSE
1899	PF3D7_1221600.1o1_4708	0.566900577	0.448704066	0.16697805	-0.118196511	0.72781543	0.999821727	FALSE
1900	PF3D7_1221900.1o1_9091	-0.645122892	-0.654754407	0.037248501	-0.009631515	0.937622482	0.999821727	FALSE
1901	PF3D7_1222300.e1s1_9154	-0.333902119	-0.379116377	0.047882938	-0.045214257	0.919889082	0.999821727	FALSE
1902	PF3D7_1222600 (renamed, has duplicates)_6843	1.853750972	1.904577823	0.097745167	0.050826851	0.837687574	0.999821727	FALSE
1903	PF3D7_1222600.e1s1_5687	-0.387894421	-0.303850171	0.235943009	0.08404425	0.625696795	0.999821727	FALSE
1904	PF3D7_1222700.1o1_8121	0.452843466	0.612817588	0.120990019	0.159974122	0.80012929	0.999821727	FALSE
1905	PF3D7_1223100.e3s1_6322	-0.386617676	-0.435524983	0.138446957	-0.048907307	0.772339495	0.999821727	FALSE
1906	PF3D7_1223600.1o2_8535	0.17520393	0.062952849	0.490074046	-0.11225108	0.334699052	0.999821727	FALSE
1907	PF3D7_1223600.e1_5670	0.746295667	0.714727964	0.151051346	-0.031567703	0.752524964	0.999821727	FALSE
1908	PF3D7_1223600.e2s1_8263	-0.55851583	-0.524927792	0.044171417	0.033588037	0.926072454	0.999821727	FALSE
1909	PF3D7_1223700.1o2_5258	0.634441016	0.540963735	0.464375682	-0.093477281	0.357739812	0.999821727	FALSE
1910	PF3D7_1223800.iso1.exon1.amp1_short_2872	-0.140299056	-0.092555359	0.069888259	0.047743697	0.883386359	0.999821727	FALSE
1911	PF3D7_1223900.iso1.exon1.amp1_106	-0.689975161	-0.738252959	0.093129994	-0.048277799	0.845211428	0.999821727	FALSE
1912	PF3D7_1224200.1o5_7077	-0.498234286	-0.339439193	0.346586936	0.158795093	0.481608414	0.999821727	FALSE
1913	PF3D7_1224500.2o2_4969	0.347433932	0.489959523	0.454509377	0.142525591	0.36695402	0.999821727	FALSE
1914	PF3D7_1225600.e2s1_7774	-0.810608038	-0.754104004	0.386194203	0.056504034	0.436537287	0.999821727	FALSE
1915	PF3D7_1226000.e1_5411	-0.075052782	-0.062851913	0.018629884	0.012200868	0.968768026	0.999821727	FALSE
1916	PF3D7_1226100.1o1_4971	-0.528554079	-0.426742784	0.234058078	0.101811294	0.628372051	0.999821727	FALSE
1917	PF3D7_1226300.e1s1_6601	-0.823151153	-0.770360807	0.50013584	0.052790346	0.326048822	0.999821727	FALSE
1918	PF3D7_1226400.iso1.exon3.amp1_1587	0.023876975	0.100835561	0.21873257	0.076958585	0.650377117	0.999821727	FALSE
1919	PF3D7_1226800.2o5_6721	-0.570897689	-0.529691056	0.210276864	0.041206633	0.662707446	0.999821727	FALSE
1920	PF3D7_1227100.e1s1_4898	0.101960355	0.063406689	0.140266472	-0.038553667	0.769465673	0.999821727	FALSE
1921	PF3D7_1227200.iso1.exon1.amp2_815	-0.289055108	-0.103327096	0.30354112	0.185728012	0.534543944	0.999821727	FALSE
1922	PF3D7_1227300.e1s2_8357	-0.356081538	-0.368568096	0.033620441	-0.012486558	0.943683095	0.999821727	FALSE
1923	PF3D7_1227500.2o2_5357	-0.483174379	-0.462747426	0.081197834	0.020426952	0.864754279	0.999821727	FALSE
1924	PF3D7_1228100.iso1.exon2.amp1_2994	0.406649102	0.616567947	0.328374219	0.209918844	0.503506352	0.999821727	FALSE
1925	PF3D7_1228100.iso1.exon3.amp1_2404	-0.739186874	-0.685545364	0.22373815	0.053641509	0.643140675	0.999821727	FALSE
1926	PF3D7_1228300.iso1.exon1.amp1_2480	-0.475105664	-0.248630086	0.950358077	0.226475578	0.100765819	0.999821727	FALSE
1927	PF3D7_1228400.s2_4794	-0.34812741	-0.375672451	0.103268326	-0.027545041	0.828711076	0.999821727	FALSE
1928	PF3D7_1228600.e1s1_5187	0.315445319	0.446747214	0.404328708	0.131301894	0.417066942	0.999821727	FALSE
1929	PF3D7_1228700.iso1.exon1.amp1_seg2_1438	-0.613038681	-0.602506683	0.013930151	0.010531998	0.976643147	0.999821727	FALSE
1930	PF3D7_1228800.e1s1_8000	-0.689110828	-0.629998008	0.135917124	0.05911282	0.776342562	0.999821727	FALSE
1931	PF3D7_1228800.e1s4_5484	-0.356897298	-0.092870429	0.600532149	0.264026869	0.250463102	0.999821727	FALSE
1932	PF3D7_1229300.1o1_8528	-0.859712654	-0.822721768	0.120314134	0.036990886	0.80121282	0.999821727	FALSE
1933	PF3D7_1229600.iso1.exon2.amp1_804	0.060045722	0.108158318	0.121814251	0.048112596	0.798808679	0.999821727	FALSE
1934	PF3D7_1229600.iso1.exon2.amp2_1093	0.690858405	0.693668787	0.004234631	0.002810383	0.99289844	0.999821727	FALSE
1935	PF3D7_1230000.iso1.exon10.amp2_1646	-0.50949505	-0.527472268	0.033080061	-0.017977217	0.944586198	0.999821727	FALSE
1936	PF3D7_1230000.iso1.exon2.amp1_2063	-0.235712972	-0.265108362	0.1740207	-0.02939539	0.717012908	0.999821727	FALSE
1937	PF3D7_1230000.iso1.exon6.amp1_333	-0.720669311	-0.75057552	0.160842914	-0.029906208	0.737288779	0.999821727	FALSE
1938	PF3D7_1230400.5o5_7268	-0.546275242	-0.520201026	0.159533261	0.026074215	0.739318443	0.999821727	FALSE
1939	PF3D7_1230600.iso1.exon1.amp1_71	-0.64778169	-0.628362533	0.187316468	0.019419157	0.696837326	0.999821727	FALSE
1940	PF3D7_1230700.1o1_6777	-0.31872513	-0.312289594	0.018427364	0.006435536	0.969107297	0.999821727	FALSE
1941	PF3D7_1231000.iso1.exon7.amp1_4124	-0.389987626	-0.345072675	0.099003734	0.044914952	0.835639399	0.999821727	FALSE
1942	PF3D7_1231400.iso1.exon4.amp1_924	0.069068856	0.002565724	0.294667124	-0.066503132	0.545961366	0.999821727	FALSE
1943	PF3D7_1231500.1o1_4656	-0.7348564	-0.927155523	0.782406642	-0.192299123	0.155104152	0.999821727	FALSE
1944	PF3D7_1231600.iso1.exon1.amp2_1920	-0.24023118	-0.156506988	0.137717816	0.083724192	0.773492376	0.999821727	FALSE
1945	PF3D7_1232000.1o2_6457	-0.549864515	-0.388841174	1.042438496	0.161023341	0.08016745	0.999821727	FALSE
1946	PF3D7_1232100.e1_8842	-0.394700048	-0.017453323	0.689079888	0.377246726	0.198208185	0.999821727	FALSE
1947	PF3D7_1232100.e2_4807	-0.111718343	-0.14869059	0.323166227	-0.036972247	0.509903248	0.999821727	FALSE
1948	PF3D7_1232600.iso1.exon1.amp1_709	-0.676894473	-0.543851977	0.275903637	0.133042496	0.57065895	0.999821727	FALSE
1949	PF3D7_1232700.iso1.exon1.amp1_3259	-0.474136413	-0.358267401	0.10876617	0.115869012	0.819807025	0.999821727	FALSE
1950	PF3D7_1233200.iso2.exon1.amp1_3096	-1.0421358	-0.945156169	0.627639299	0.096979631	0.23314937	0.999821727	FALSE
1951	PF3D7_1233200.iso2.exon1.amp2_seg2_2883	-0.744425294	-0.724506923	0.101174726	0.019918371	0.832110066	0.999821727	FALSE
1952	PF3D7_1233200.iso2.exon1.amp3_seg1_1729	-0.400203023	-0.576981528	0.574151554	-0.176778505	0.268519499	0.999821727	FALSE
1953	PF3D7_1233300.s1_7401	-0.499086751	-0.422418768	0.2542368	0.076667983	0.600097757	0.999821727	FALSE
1954	PF3D7_1233300.s2_5950	-0.005273171	0.072855448	0.099892046	0.07812862	0.834194718	0.999821727	FALSE
1955	PF3D7_1233400.1o4_5291	0.155689789	0.088483001	0.326377537	-0.067206787	0.505951766	0.999821727	FALSE
1956	PF3D7_1233600.e1s3_8293	-0.661397718	-0.633255358	0.028816953	0.02814236	0.951714259	0.999821727	FALSE
1957	PF3D7_1233700.iso1.exon1.amp1_1031	-0.014827432	0.07274159	0.107332851	0.087569022	0.822125267	0.999821727	FALSE
1958	PF3D7_1233800.3o3_4664	-0.380517676	-0.492734653	0.317538686	-0.112216977	0.51688268	0.999821727	FALSE
1959	PF3D7_1234300.2o2_6755	-0.333894226	-0.386684096	0.074422122	-0.052789871	0.875905191	0.999821727	FALSE
1960	PF3D7_1234600.iso1.exon1.amp1_2569	-0.684133254	-0.517033332	0.625979483	0.167099921	0.234174622	0.999821727	FALSE
1961	PF3D7_1234600.iso1.exon1.amp2_3083	-0.412806936	-0.333274273	0.077085353	0.079532662	0.871517927	0.999821727	FALSE
1962	PF3D7_1234700.iso1.exon2.amp1_2955	-0.480486402	-0.540055828	0.259348907	-0.059569426	0.593064651	0.999821727	FALSE
1963	PF3D7_1234800.e1s1_7490	-0.394426099	-0.545613968	0.165795874	-0.151187869	0.729636351	0.999821727	FALSE
1964	PF3D7_1234800.e1s2_8941	0.273514504	0.723388248	0.709547843	0.449873744	0.187791525	0.999821727	FALSE
1965	PF3D7_1235000.iso1.exon2.amp1_3863	-0.589456668	-0.720214492	0.227670459	-0.130757824	0.637489126	0.999821727	FALSE
1966	PF3D7_1235000.iso1.exon3.amp1_650	0.949293773	0.888396696	0.289296187	-0.060897077	0.552954172	0.999821727	FALSE
1967	PF3D7_1235200.iso1.exon2.amp1_3400	-0.397586615	-0.362646798	0.074767137	0.034939817	0.875336524	0.999821727	FALSE
1968	PF3D7_1235200.iso1.exon2.amp2_2539	-0.175996479	-0.110072271	0.220103403	0.065924208	0.648390649	0.999821727	FALSE
1969	PF3D7_1235400.e1s2_5177	-0.464305863	-0.499108142	0.169237558	-0.034802279	0.724341128	0.999821727	FALSE
1970	PF3D7_1235800.iso1.exon4.amp1_2414	-0.099890103	0.08391144	0.502294016	0.183801543	0.324220183	0.999821727	FALSE
1971	PF3D7_1236000.1o1_6739	0.758552618	0.752466271	0.005026297	-0.006086347	0.991570866	0.999821727	FALSE
1972	PF3D7_1236100.e2s1_7758	-0.025169936	0.048847951	0.217551381	0.074017887	0.652091592	0.999821727	FALSE
1973	PF3D7_1236200.iso1.exon1.amp2_4226	0.087172737	0.395253443	0.526313998	0.308080706	0.304495628	0.999821727	FALSE
1974	PF3D7_1236300.1o1_5000	-0.480609791	-0.618432064	0.75905673	-0.137822273	0.164875363	0.999821727	FALSE
1975	PF3D7_1236500.1o1_7853	-0.382892995	-0.29624463	0.124863453	0.086648364	0.793930256	0.999821727	FALSE
1976	PF3D7_1237300.iso1.exon3.amp1_116	-0.551000003	-0.275179329	0.500443938	0.275820674	0.325787193	0.999821727	FALSE
1977	PF3D7_1237400.3o3_5573	-0.695932644	-0.515266269	0.419207525	0.180666376	0.401635184	0.999821727	FALSE
1978	PF3D7_1237400.e3_7403	-0.191944202	-0.103415862	0.158419797	0.088528341	0.74104608	0.999821727	FALSE
1979	PF3D7_1237900.iso1.exon1.amp1_4591	-0.451375883	-0.299023165	0.135326108	0.152352718	0.777278971	0.999821727	FALSE
1980	PF3D7_1238200.iso1.exon1.amp1_3886	-0.805341307	-0.7169018	0.489304911	0.088439508	0.335368788	0.999821727	FALSE
1981	PF3D7_1238400.iso1.exon4.amp1_630	0.347896177	0.343955005	0.004015464	-0.003941172	0.993265974	0.999821727	FALSE
1982	PF3D7_1238600.iso1.exon1.amp1_1581	-0.18669182	-0.193802936	0.008136614	-0.007111116	0.986355424	0.999821727	FALSE
1983	PF3D7_1238800.e1s1_6061	0.125979218	0.297820602	0.217959882	0.171841384	0.651498365	0.999821727	FALSE
1984	PF3D7_1239200.e1s2_7139	-0.921145097	-0.755288937	0.456169897	0.16585616	0.365388778	0.999821727	FALSE
1985	PF3D7_1239400.1o1_5240	-0.519950635	-0.558456002	0.096618715	-0.038505367	0.839522068	0.999821727	FALSE
1986	PF3D7_1239600.1o1_9028	-0.58077655	-0.535237577	0.320807749	0.045538973	0.512819812	0.999821727	FALSE
1987	PF3D7_1239700.e1s1_5983	0.318921935	0.426297859	0.153509907	0.107375925	0.748686103	0.999821727	FALSE
1988	PF3D7_1239800.s5_6570	0.604982816	0.686987025	0.423230362	0.082004209	0.397546392	0.999821727	FALSE
1989	PF3D7_1240000.iso1.exon1.amp1_735	-0.772689333	-0.7694112	0.014013795	0.003278134	0.976502958	0.999821727	FALSE
1990	PF3D7_1240300.iso1.exon1.amp2_2520	-0.097378568	0.053709303	0.31459427	0.151087871	0.520562164	0.999821727	FALSE
1991	PF3D7_1240300.iso1.exon2.amp1_4487	1.368154422	1.471477677	0.312931849	0.103323255	0.522648002	0.999821727	FALSE
1992	PF3D7_1240400.iso1.exon2.amp1_1013	2.783775885	2.901587488	0.303528764	0.117811603	0.534559724	0.999821727	FALSE
1993	PF3D7_1240600.iso1.exon2.amp1_2168	0.264845841	0.229239001	0.091377931	-0.03560684	0.848073009	0.999821727	FALSE
1994	PF3D7_1240900.iso1.exon3.amp1_1880	1.885136006	2.013883195	1.330875672	0.128747189	0.040903377	0.999821727	FALSE
1995	PF3D7_1240900.iso1.exon4.amp2_3972	-0.068636862	-0.067269467	0.007839999	0.001367396	0.986852763	0.999821727	FALSE
1996	PF3D7_1241300.iso1.exon1.amp1_2759	-0.41052606	-0.342824604	0.093815984	0.067701456	0.844091808	0.999821727	FALSE
1997	PF3D7_1241400.iso1.exon1.amp2_seg2_276	-0.507656384	-0.49828865	0.064701647	0.009367734	0.891962628	0.999821727	FALSE
1998	PF3D7_1241700.e2s1_7179	-0.527884207	-0.597910615	0.541993649	-0.070026407	0.292228864	0.999821727	FALSE
[truncated: 806 more rows]
