# Supplementary material for: Proteome-wide analysis of a malaria vaccine study reveals personalized humoral immune profiles in Tanzanian adults
Source: eLife. 2020 Jul 14;9:e53080. doi: 10.7554/eLife.53080 (PMC7386907; doi:10.7554/eLife.53080)
Supplement: Figure 7—source data 1. — List of the antigens that increased in reactivity following immunization, or that were reactive after immunization in at least 50% (highlighted in blue) of a given group are listed, including the ID, gene ID, Description, and the number of volunteers for which the antigen was reactive or had increased reactivity following immunization. [file elife-53080-fig7-data1.xlsx]

## Sheet: NOTE
	Antigens that increased in reactivity following immunization, or that were reactive after immunization in at least 80% (highlighted in green) or 50% (highlighted in blue) of a given group are listed, including the ID, gene ID, Description, and the number of volunteers for which the antigen was reactive or had increased reactivity following immunization
	Definition of Increased reactivity: antigens for which reactivity levels were higher after immunization compared to before immunization, and for which reacitivity was positive after immunization
	Different sheets are showing:
	Increased in Protected			antigens with increased in reactivityin at least 4 out of 5 (green) or 3 out of 5 (green and blue) protected individuals
	Increased in nonProtected			antigens with increased in reactivityin at least 27 out of 33 (green) or 17 out of 33 (green and blue) non protected individuals
	Reactive in Protected			antigens reactive after immunization in at least 4 out of 5 (green) or 3 out of 5 (green and blue) protected individuals
	Reactive in nonProtected			antigens reactive after immunization in at least 27 out of 33 (green) or 17out of 33 (green and blue) non protected individuals
	Group 3, Increased in Protected			antigens with increased in reactivityin at least 4 out of 4 (green) or 2 out of 4 (green and blue) protected individuals from the higher dose group
	Group 3, Increased in nonProtected			antigens with increased in reactivityin at least 13 out of 16 (green) or 8 out of 16 (green and blue) non protected individuals from the higher dose group

## Sheet: Increased in Protected
unique_ID	count_protec_increased	Gene.ID	Description
PF3D7_0304600_7131	5	PF3D7_0304600	circumsporozoite (CS) protein (CSP)
PF3D7_1240900.iso1.exon3.amp1_1880	5	PF3D7_1240900	erythrocyte membrane protein 1, PfEMP1
PF3D7_1408700.e3s1_8075	5	PF3D7_1408700	conserved Plasmodium protein, unknown function
PF3D7_0100600.iso1.exon1.amp1_2163	4	PF3D7_0100600	rifin
PF3D7_0102200.e2s2_7188	4	PF3D7_0102200	ring-infected erythrocyte surface antigen (RESA)
PF3D7_0200100.iso1.exon2.amp1_2746	4	PF3D7_0200100	erythrocyte membrane protein 1, PfEMP1
PF3D7_0201300.iso1.exon2.amp1_119	4	PF3D7_0201300	stevor
PF3D7_0206800_8292	4	PF3D7_0206800	merozoite surface protein 2 (MSP2)
PF3D7_0207000.1o2_6703	4	PF3D7_0207000	merozoite surface protein 4 (MSP4)
PF3D7_0207000.e1_7116	4	PF3D7_0207000	merozoite surface protein 4 (MSP4)
PF3D7_0207700.2o4_5642	4	PF3D7_0207700	serine repeat antigen 4 (SERA4)
PF3D7_0220000.e2s1_7105	4	PF3D7_0220000	liver stage antigen 3 (LSA3)
PF3D7_0220000.e2s2_7394	4	PF3D7_0220000	liver stage antigen 3 (LSA3)
PF3D7_0223300.iso1.exon2.amp1_3611	4	PF3D7_0223300	erythrocyte membrane protein 1 (PfEMP1), truncated
PF3D7_0301900.1o1_7888	4	PF3D7_0301900	conserved Plasmodium protein, unknown function
PF3D7_0303700.e1s1_6024	4	PF3D7_0303700	dihydrolipoamide acyltransferase, putative
PF3D7_0404600.s3_7434	4	PF3D7_0404600	conserved Plasmodium membrane protein, unknown function
PF3D7_0410300.1o2_7946	4	PF3D7_0410300	protein phosphatase, putative
PF3D7_0410900.1o1_6799	4	PF3D7_0410900	conserved Plasmodium protein, unknown function
PF3D7_0421200.iso1.exon2.amp1_3312	4	PF3D7_0421200	rifin
PF3D7_0421300.iso1.exon1.amp1_2739	4	PF3D7_0421300	erythrocyte membrane protein 1, PfEMP1
PF3D7_0425500.iso1.exon1.amp1_1565	4	PF3D7_0425500	stevor
PF3D7_0500100.iso1.exon2.amp1_1299	4	PF3D7_0500100	erythrocyte membrane protein 1, PfEMP1
PF3D7_0520400.e1s1_6896	4	PF3D7_0520400	conserved Plasmodium protein, unknown function
PF3D7_0608100.iso1.exon1.amp2_2496	4	PF3D7_0608100	conserved Plasmodium protein, unknown function
PF3D7_0630600.2o2_8237	4	PF3D7_0630600	conserved Plasmodium protein, unknown function
PF3D7_0701100.iso1.exon3.amp1_2151	4	PF3D7_0701100	rifin
PF3D7_0707400.iso1.exon1.amp1_1310	4	PF3D7_0707400	AAA family ATPase, putative
PF3D7_0711700.e2s1_5452	4	PF3D7_0711700	erythrocyte membrane protein 1, PfEMP1 (VAR)
PF3D7_0712000.iso1.exon1.amp1_145	4	PF3D7_0712000	erythrocyte membrane protein 1, PfEMP1
PF3D7_0712300.iso1.exon1.amp1_3615	4	PF3D7_0712300	erythrocyte membrane protein 1, PfEMP1
PF3D7_0712600.iso1.exon1.amp1_434	4	PF3D7_0712600	erythrocyte membrane protein 1, PfEMP1
PF3D7_0722800.1o1_5891	4	PF3D7_0722800	conserved Plasmodium protein, unknown function
PF3D7_0732700.iso1.exon2.amp1_712	4	PF3D7_0732700	rifin
PF3D7_0800100.iso1.exon1.amp1_723	4	PF3D7_0800100	erythrocyte membrane protein 1, PfEMP1
PF3D7_0800200.e2s1_5745	4	PF3D7_0800200	erythrocyte membrane protein 1, PfEMP1 (VAR)
PF3D7_0800300.e2s1_8914	4	PF3D7_0800300	erythrocyte membrane protein 1, PfEMP1 (VAR)
PF3D7_0809100.iso1.exon1.amp1_4184	4	PF3D7_0809100	erythrocyte membrane protein 1, PfEMP1
PF3D7_0830800.iso1.exon1.amp1_1373	4	PF3D7_0830800	surface-associated interspersed protein 8.2 (SURFIN 8.2)
PF3D7_0832800.iso1.exon3.amp1_1854	4	PF3D7_0832800	rifin
PF3D7_0833500.iso1.exon3.amp1_3614	4	PF3D7_0833500	erythrocyte membrane protein 1, PfEMP1
PF3D7_0900100.iso1.exon2.amp1_151	4	PF3D7_0900100	erythrocyte membrane protein 1, PfEMP1
PF3D7_0900900.iso1.exon1.amp1_4454	4	PF3D7_0900900	stevor
PF3D7_0903500.e1s1_7220	4	PF3D7_0903500	conserved Plasmodium protein, unknown function
PF3D7_0907700.e1s1_8630	4	PF3D7_0907700	subunit of proteaseome activator complex, putative
PF3D7_0909500_5686	4	PF3D7_0909500	subpellicular microtubule protein 1, putative (SPM1)
PF3D7_0923800.1.e1s1_7487	4	PF3D7_0923800.1	thioredoxin reductase (TRXR)
PF3D7_0937700.iso1.exon2.amp1_713	4	PF3D7_0937700	rifin
PF3D7_1000100.iso1.exon2.amp1_3908	4	PF3D7_1000100	erythrocyte membrane protein 1, PfEMP1
PF3D7_1007700.e1s2_8091	4	PF3D7_1007700	transcription factor with AP2 domain(s) (ApiAP2)
PF3D7_1014100.s1_5371	4	PF3D7_1014100	conserved Plasmodium protein, unknown function
PF3D7_1030200.1o1_4717	4	PF3D7_1030200	conserved Plasmodium protein, unknown function
PF3D7_1035900.1o1_5890	4	PF3D7_1035900	probable protein, unknown function
PF3D7_1037000.iso1.exon3.amp1_4275	4	PF3D7_1037000	DNA polymerase zeta catalytic subunit, putative
PF3D7_1040200.iso1.exon2.amp1_408	4	PF3D7_1040200	stevor
PF3D7_1040900.iso1.exon2.amp1_2143	4	PF3D7_1040900	rifin
PF3D7_1041300.iso1.exon1.amp1_1293	4	PF3D7_1041300	erythrocyte membrane protein 1, PfEMP1
PF3D7_1101200.iso1.exon1.amp1_3319	4	PF3D7_1101200	rifin
PF3D7_1103800.e1s1_7393	4	PF3D7_1103800	CCR4-NOT transcription complex subunit 1, putative (NOT1)
PF3D7_1118200.e1s1_7968	4	PF3D7_1118200	heat shock protein 90, putative
PF3D7_1121800.s1_7974	4	PF3D7_1121800	petidase, M16 family
PF3D7_1133400_6235	4	PF3D7_1133400	apical membrane antigen 1 (AMA1)
PF3D7_1150400.iso1.exon2.amp1_714	4	PF3D7_1150400	erythrocyte membrane protein 1, PfEMP1
PF3D7_1219600.iso1.exon3.amp2_2830	4	PF3D7_1219600	aminophospholipid-transporting P-ATPase
PF3D7_1239800.s5_6570	4	PF3D7_1239800	conserved Plasmodium protein, unknown function
PF3D7_1240400.iso1.exon2.amp1_1013	4	PF3D7_1240400	erythrocyte membrane protein 1, PfEMP1
PF3D7_1252200.1o1_7010	4	PF3D7_1252200	chitinase (CHT1)
PF3D7_1255200.iso1.exon1.amp1_3324	4	PF3D7_1255200	erythrocyte membrane protein 1, PfEMP1
PF3D7_1300300.s2 (renamed)_7313	4	PF3D7_1300300	erythrocyte membrane protein 1, PfEMP1 (VAR)
PF3D7_1300600.iso1.exon1.amp1_4179	4	PF3D7_1300600	rifin
PF3D7_1300900.iso1.exon1.amp1_4455	4	PF3D7_1300900	stevor
PF3D7_1305700.1o1_6964	4	PF3D7_1305700	conserved Plasmodium protein, unknown function
PF3D7_1325900.e1s1_8003	4	PF3D7_1325900	conserved Plasmodium protein, unknown function
PF3D7_1328200.iso1.exon1.amp2_seg1_277	4	PF3D7_1328200	conserved Plasmodium protein, unknown function
PF3D7_1329200.iso1.exon1.amp1_2427	4	PF3D7_1329200	conserved Plasmodium protein, unknown function
PF3D7_1334200.e1s1_6893	4	PF3D7_1334200	chaperone binding protein, putative
PF3D7_1334400.1o1_8728	4	PF3D7_1334400	MSP7-like protein (MSRP4)
PF3D7_1400700.iso1.exon1.amp1_2135	4	PF3D7_1400700	stevor
PF3D7_1407900.e1s1_6608	4	PF3D7_1407900	plasmepsin I (PMI)
PF3D7_1410400.e1s1_7222	4	PF3D7_1410400	rhoptry-associated protein 1 (RAP1)
PF3D7_1473100.e2s1_8340	4	PF3D7_1473100	GTPase activator, putative
PF3D7_1479400.iso1.exon2.amp1_140	4	PF3D7_1479400	rifin
PF3D7_1479800.iso1.exon2.amp1_4468	4	PF3D7_1479800	rifin
PF3D7_0215700.e2s2_6920	4	PF3D7_0215700	DNA-directed RNA polymerase II second largest subunit, putative
PF3D7_0312400.2o7_8753	4	PF3D7_0312400	glycogen synthase kinase 3 (GSK3)
PF3D7_0511400_8865	4	PF3D7_0511400	conserved Plasmodium protein, unknown function
PF3D7_0726400.e6s2_4899	4	PF3D7_0726400	conserved Plasmodium membrane protein, unknown function
PF3D7_0923800.iso2.exon1.amp1_446	4	PF3D7_0923800	thioredoxin reductase
PF3D7_1009000.1o1_8727	4	PF3D7_1009000	diphthine synthase
PF3D7_1021800.iso1.exon2.amp1_3703	4	PF3D7_1021800	conserved Plasmodium protein, unknown function
PF3D7_1122900.e2s5_7132	4	PF3D7_1122900	dynein heavy chain, putative
PF3D7_1130400_8004	4	PF3D7_1130400	26S proteasome regulatory subunit 6a, putative
PF3D7_1132300.1o1_5547	4	PF3D7_1132300	nucleic acid binding protein, putative
PF3D7_1137900.2o2_4737	4	PF3D7_1137900	conserved Plasmodium protein, unknown function
PF3D7_1201200.2o2_4660	4	PF3D7_1201200	Plasmodium exported protein, unknown function
PF3D7_1325500.iso1.exon1.amp1_1897	4	PF3D7_1325500	conserved Plasmodium protein, unknown function
PF3D7_1352700.iso1.exon1.amp3_2204	4	PF3D7_1352700	P-loop containing nucleoside triphosphate hydrolase, putative
PF3D7_1353300.iso1.exon1.amp2_237	4	PF3D7_1353300	conserved Plasmodium protein, unknown function
PF3D7_1405200.iso1.exon1.amp1_3269	4	PF3D7_1405200	sybindin-like protein, putative
PF3D7_1446700.1o2_9003	4	PF3D7_1446700	conserved Plasmodium protein, unknown function
PF3D7_0115700.iso1.exon1.amp1_1583	3	PF3D7_0115700	erythrocyte membrane protein 1, PfEMP1
PF3D7_0210200.iso1.exon2.amp2_seg1_2597	3	PF3D7_0210200	conserved Plasmodium protein, unknown function
PF3D7_0217700.iso1.exon1.amp1_3848	3	PF3D7_0217700	E2F-associated phosphoprotein, putative
PF3D7_0217900.e1s1_7766	3	PF3D7_0217900	conserved Plasmodium protein, unknown function
PF3D7_0219700.2o2_6131	3	PF3D7_0219700	Plasmodium exported protein (PHISTc), unknown function (GEXP20)
PF3D7_0300100.iso1.exon2.amp1_138	3	PF3D7_0300100	erythrocyte membrane protein 1, PfEMP1
PF3D7_0302200.e1_5952	3	PF3D7_0302200	cytoadherence linked asexual protein 3.2 (CLAG3.2)
PF3D7_0302500.e1s1_7185	3	PF3D7_0302500	cytoadherence linked asexual protein 3.1 (CLAG3.1)
PF3D7_0315400.1o1_8147	3	PF3D7_0315400	conserved Plasmodium protein, unknown function
PF3D7_0401000.iso1.exon1.amp1_2432	3	PF3D7_0401000	rifin
PF3D7_0412900.iso1.exon1.amp1_435	3	PF3D7_0412900	erythrocyte membrane protein 1, PfEMP1
PF3D7_0420700.e2s1_8336	3	PF3D7_0420700	erythrocyte membrane protein 1, PfEMP1 (VAR)
PF3D7_0422100 (renamed)_7011	3	PF3D7_0422100	transmembrane emp24 domain-containing protein, putative
PF3D7_0425800.iso1.exon2.amp1_4183	3	PF3D7_0425800	erythrocyte membrane protein 1, PfEMP1
PF3D7_0509900.iso1.exon1.amp1_3597	3	PF3D7_0509900	conserved Plasmodium protein, unknown function
PF3D7_0524800.iso1.exon1.amp1_2188	3	PF3D7_0524800	ubiquitin fusion degradation protein UFD1, putative
PF3D7_0525800.e1s1_6607	3	PF3D7_0525800	membrane skeletal protein IMC1-related
PF3D7_0526600.iso1.exon1.amp4_3706	3	PF3D7_0526600	conserved Plasmodium protein, unknown function
PF3D7_0530100.2o2_9005	3	PF3D7_0530100	SNARE protein, putative (SYN6)
PF3D7_0532100_6557	3	PF3D7_0532100	early transcribed membrane protein 5 (ETRAMP5)
PF3D7_0604100.iso1.exon1.amp2_3651	3	PF3D7_0604100	transcription factor with AP2 domain(s)
PF3D7_0606100.iso1.exon4.amp1_4473	3	PF3D7_0606100	RNA binding protein, putative
PF3D7_0628100.iso1.exon1.amp9_1961	3	PF3D7_0628100	HECT-domain (ubiquitin-transferase), putative
PF3D7_0632500.iso1.exon1.amp1_3326	3	PF3D7_0632500	erythrocyte membrane protein 1, PfEMP1
PF3D7_0700100.iso1.exon3.amp1_1301	3	PF3D7_0700100	erythrocyte membrane protein 1, PfEMP1
PF3D7_0701000.1o1_5806	3	PF3D7_0701000	erythrocyte membrane protein 1 (PfEMP1), pseudogene
PF3D7_0703500.e2s2_7503	3	PF3D7_0703500	erythrocyte membrane-associated antigen
PF3D7_0704800.iso1.exon1.amp2_1629	3	PF3D7_0704800	conserved Plasmodium protein, unknown function
PF3D7_0705500.iso1.exon2.amp2_3383	3	PF3D7_0705500	inositol-phosphate phosphatase, putative
PF3D7_0709400.iso1.exon2.amp1_2171	3	PF3D7_0709400	Cg7 protein
PF3D7_0716300.e1s1_8921	3	PF3D7_0716300	conserved Plasmodium protein, unknown function
PF3D7_0719700 (renamed)_9040	3	PF3D7_0719700	40S ribosomal protein S10, putative
PF3D7_0732000.iso1.exon2.amp1_690	3	PF3D7_0732000	stevor
PF3D7_0732200.iso1.exon2.amp1_1297	3	PF3D7_0732200	rifin
PF3D7_0808200.e1s1_9217	3	PF3D7_0808200	plasmepsin X
PF3D7_0808600.e2s1_8343	3	PF3D7_0808600	erythrocyte membrane protein 1, PfEMP1 (VAR)
PF3D7_0827600.2o2_6223	3	PF3D7_0827600	conserved Plasmodium protein, unknown function
PF3D7_0900500.iso1.exon1.amp1_4464	3	PF3D7_0900500	rifin
PF3D7_0901000.iso1.exon1.amp1_3010	3	PF3D7_0901000	rifin
PF3D7_0903500.e1s2_7214	3	PF3D7_0903500	conserved Plasmodium protein, unknown function
PF3D7_0905100.iso1.exon3.amp1_1647	3	PF3D7_0905100	nucleoporin NUP100/NSP100, putative
PF3D7_0936300.2o2_8152	3	PF3D7_0936300	ring-exported protein 3 (REX3)
PF3D7_1000200.iso1.exon1.amp1_1575	3	PF3D7_1000200	rifin
PF3D7_1002100.2o2_7048	3	PF3D7_1002100	PF70 protein (PF70)
PF3D7_1003800.e1s2_7780	3	PF3D7_1003800	U5 small nuclear ribonuclear protein, putative
PF3D7_1012700.e1s1_7980	3	PF3D7_1012700	protein phosphatase, putative
PF3D7_1014100.s2_5660	3	PF3D7_1014100	conserved Plasmodium protein, unknown function
PF3D7_1036000.1o1_5293	3	PF3D7_1036000	merozoite surface protein (MSP11)
PF3D7_1134700.e2s2_6835	3	PF3D7_1134700	DNA-directed RNA polymerase 1, subunit 2, putative
PF3D7_1200300.e2s1_7189	3	PF3D7_1200300	rifin (RIF)
PF3D7_1201400.iso1.exon1.amp1_218	3	PF3D7_1201400	Plasmodium exported protein, unknown function
PF3D7_1222600 (renamed, has duplicates)_6843	3	PF3D7_1222600	transcription factor with AP2 domain(s) (ApiAP2)
PF3D7_1254300.iso1.exon2.amp1_2431	3	PF3D7_1254300	stevor
PF3D7_1254600.iso1.exon2.amp1_2720	3	PF3D7_1254600	stevor
PF3D7_1321800.1o4_7280	3	PF3D7_1321800	SFT2-like protein, putative
PF3D7_1328300.1o3_6129	3	PF3D7_1328300	conserved Plasmodium protein, unknown function
PF3D7_1334800.1o1_8159	3	PF3D7_1334800	MSP7-like protein (MSRP2)
PF3D7_1353700.1o1_5245	3	PF3D7_1353700	conserved Plasmodium protein, unknown function
PF3D7_1372800.iso1.exon2.amp1_3009	3	PF3D7_1372800	stevor
PF3D7_1373400.iso1.exon2.amp1_2732	3	PF3D7_1373400	rifin
PF3D7_1373500.iso1.exon1.amp1_2457	3	PF3D7_1373500	erythrocyte membrane protein 1, PfEMP1
PF3D7_1427200.1o2_8707	3	PF3D7_1427200	selenoprotein (Sel4)
PF3D7_1476500.2o2_5550	3	PF3D7_1476500	probable protein, unknown function
PF3D7_0101300.iso1.exon2.amp1_4146	3	PF3D7_0101300	Pfmc-2TM Maurer's cleft two transmembrane protein
PF3D7_0101600.iso1.exon1.amp1_3887	3	PF3D7_0101600	rifin
PF3D7_0101800.iso1.exon1.amp1_2719	3	PF3D7_0101800	stevor
PF3D7_0102200.e2s1_7477	3	PF3D7_0102200	ring-infected erythrocyte surface antigen (RESA)
PF3D7_0108300.s2_7111	3	PF3D7_0108300	conserved Plasmodium protein, unknown function
PF3D7_0112000.3o4_5862	3	PF3D7_0112000	TatD-like deoxyribonuclease, putative
PF3D7_0112100.1o1_6684	3	PF3D7_0112100	conserved Plasmodium protein, unknown function
PF3D7_0113800.2o4_7664	3	PF3D7_0113800	DBL containing protein, unknown function
PF3D7_0115400.iso1.exon2.amp1_2714	3	PF3D7_0115400	stevor
PF3D7_0200400.iso1.exon1.amp1_1275	3	PF3D7_0200400	stevor
PF3D7_0201000.iso1.exon1.amp1_3595	3	PF3D7_0201000	rifin
PF3D7_0201200.iso1.exon2.amp1_3603	3	PF3D7_0201200	rifin
PF3D7_0201800.iso1.exon1.amp1_4451	3	PF3D7_0201800	RESA-like protein with PHIST and DnaJ domains
PF3D7_0207500.e3s1_8088	3	PF3D7_0207500	serine repeat antigen 6 (SERA6)
PF3D7_0219600.e1s1_8817	3	PF3D7_0219600	replication factor C subunit 1, putative
PF3D7_0222100.iso1.exon1.amp1_3007	3	PF3D7_0222100	Pfmc-2TM Maurer's cleft two transmembrane protein
PF3D7_0223500.iso1.exon1.amp1_3027	3	PF3D7_0223500	erythrocyte membrane protein 1, PfEMP1
PF3D7_0300200.iso1.exon1.amp1_3012	3	PF3D7_0300200	rifin
PF3D7_0300400.iso1.exon1.amp1_401	3	PF3D7_0300400	stevor
PF3D7_0307500.iso1.exon4.amp1_417	3	PF3D7_0307500	conserved Plasmodium protein, unknown function
PF3D7_0324600.iso1.exon2.amp1_3003	3	PF3D7_0324600	stevor (3D7-stevorT3-2)
PF3D7_0324900.iso1.exon1.amp1_2456	3	PF3D7_0324900	erythrocyte membrane protein 1, PfEMP1
PF3D7_0400200.iso1.exon1.amp1_1876	3	PF3D7_0400200	erythrocyte membrane protein 1 (PfEMP1), exon2
PF3D7_0400400.iso1.exon1.amp1_1294	3	PF3D7_0400400	erythrocyte membrane protein 1, PfEMP1
PF3D7_0400800.iso1.exon1.amp1_3008	3	PF3D7_0400800	stevor
PF3D7_0401900.1o1_7666	3	PF3D7_0401900	acyl-CoA synthetase (ACS6)
PF3D7_0412700.iso1.exon1.amp1_2752	3	PF3D7_0412700	erythrocyte membrane protein 1, PfEMP1
PF3D7_0502400.1o1_5886	3	PF3D7_0502400	ring-stage membrane protein 1,merozoite surface protein 8 (MSP8)
PF3D7_0506300.iso1.exon1.amp1_3900	3	PF3D7_0506300	conserved Plasmodium protein, unknown function
PF3D7_0527200.e2s1_8350	3	PF3D7_0527200	ubiquitin carboxyl-terminal hydrolase, putative
PF3D7_0601200.iso1.exon2.amp1_695	3	PF3D7_0601200	Pfmc-2TM Maurer's cleft two transmembrane protein
PF3D7_0602700.iso1.exon1.amp1_1591	3	PF3D7_0602700	conserved Plasmodium protein, unknown function
PF3D7_0606800.1o1_4981	3	PF3D7_0606800	probable protein, unknown function
PF3D7_0617400.s3 (renamed)_7396	3	PF3D7_0617400	erythrocyte membrane protein 1, PfEMP1 (VAR)
PF3D7_0617600.iso1.exon1.amp1_3292	3	PF3D7_0617600	stevor
PF3D7_0620400.1o1_7613	3	PF3D7_0620400	merozoite surface protein 10 (MSP10)
PF3D7_0621400.1o1_8784	3	PF3D7_0621400	Pf77 protein (ALV7)
PF3D7_0625600.1o1_7626	3	PF3D7_0625600	poly(A) polymerase PAP, putative
PF3D7_0631100.iso1.exon2.amp1_1011	3	PF3D7_0631100	Plasmodium exported protein (PHISTb), unknown function
PF3D7_0631400.iso1.exon1.amp1_1562	3	PF3D7_0631400	Pfmc-2TM Maurer's cleft two transmembrane protein
PF3D7_0632300.iso1.exon2.amp1_423	3	PF3D7_0632300	rifin
PF3D7_0632700.iso1.exon2.amp1_2437	3	PF3D7_0632700	rifin
PF3D7_0700400.iso1.exon3.amp1_4165	3	PF3D7_0700400	stevor
PF3D7_0702300.2o2_7331	3	PF3D7_0702300	sporozoite threonine and asparagine-rich protein (STARP)
PF3D7_0711100.iso1.exon1.amp1_1552	3	PF3D7_0711100	conserved Plasmodium membrane protein, unknown function
PF3D7_0712400.iso1.exon1.amp1_1004	3	PF3D7_0712400	erythrocyte membrane protein 1, PfEMP1
PF3D7_0712900.iso1.exon1.amp1_3316	3	PF3D7_0712900	erythrocyte membrane protein 1, PfEMP1
PF3D7_0721700_4819	3	PF3D7_0721700	secreted ookinete protein, putative (PSOP1)
PF3D7_0731100.2o2_6789	3	PF3D7_0731100	Plasmodium exported protein (PHISTc), unknown function (GEXP11)
PF3D7_0733000.iso1.exon1.amp1_3621	3	PF3D7_0733000	erythrocyte membrane protein 1, PfEMP1
PF3D7_0803400.iso1.exon1.amp2_3948	3	PF3D7_0803400	DNA repair protein rad54, putative
PF3D7_0818900_4784	3	PF3D7_0818900	heat shock protein 70 (Hsp70)
PF3D7_0833300.iso1.exon1.amp1_1870	3	PF3D7_0833300	erythrocyte membrane protein 1 (PfEMP1), exon2
PF3D7_0901500.iso1.exon2.amp1_4476	3	PF3D7_0901500	rifin
PF3D7_0901800.2o2_8725	3	PF3D7_0901800	Plasmodium exported protein, unknown function
PF3D7_0918300.e2s1_6599	3	PF3D7_0918300	eukaryotic translation initiation factor 3 subunit 5, putative
PF3D7_0930300.s2_8884	3	PF3D7_0930300	merozoite surface protein 1 (MSP1)
PF3D7_0933900.4o4_5828	3	PF3D7_0933900	conserved Plasmodium protein, unknown function
PF3D7_0935800.e9_9148	3	PF3D7_0935800	cytoadherence linked asexual protein 9 (CLAG9)
PF3D7_0937400.iso1.exon2.amp1_1296	3	PF3D7_0937400	rifin
PF3D7_1000500.iso1.exon3.amp1_4465	3	PF3D7_1000500	rifin
PF3D7_1001300.2o2_6130	3	PF3D7_1001300	Plasmodium exported protein (PHISTa), unknown function
PF3D7_1007300.iso1.exon1.amp1_3315	3	PF3D7_1007300	conserved Plasmodium protein, unknown function
PF3D7_1021900.e1s2_5472	3	PF3D7_1021900	conserved Plasmodium protein (10b antigen), unknown function
PF3D7_1023100.e1s6_5941	3	PF3D7_1023100	dynein heavy chain, putative
PF3D7_1035100.1o1_8208	3	PF3D7_1035100	probable protein, unknown function
PF3D7_1035800.1o1_5041	3	PF3D7_1035800	probable protein, unknown function
PF3D7_1036500.1o1_6762	3	PF3D7_1036500	probable protein, unknown function
PF3D7_1039700.iso1.exon1.amp1_1851	3	PF3D7_1039700	Pfmc-2TM Maurer's cleft two transmembrane protein
PF3D7_1040100.iso1.exon2.amp1_3299	3	PF3D7_1040100	rifin
PF3D7_1041000.iso1.exon2.amp1_1280	3	PF3D7_1041000	rifin
PF3D7_1100100.iso1.exon2.amp1_1582	3	PF3D7_1100100	erythrocyte membrane protein 1, PfEMP1
PF3D7_1100300.iso1.exon2.amp1_4474	3	PF3D7_1100300	rifin
PF3D7_1101700.iso1.exon2.amp1_2140	3	PF3D7_1101700	Pfmc-2TM Maurer's cleft two transmembrane protein
PF3D7_1102500.e2s1_5459	3	PF3D7_1102500	Plasmodium exported protein (PHISTb), unknown function (GEXP02)
PF3D7_1113700.e1s1_8346	3	PF3D7_1113700	glyoxalase I (GloI)
PF3D7_1121600.iso1.exon2.amp1_2679	3	PF3D7_1121600	circumsporozoite-related antigen
PF3D7_1122800.e1s1_6545	3	PF3D7_1122800	calcium dependent protein kinase 6 (CDPK6)
PF3D7_1128100.2o3_7845	3	PF3D7_1128100	cochaperone prefoldin complex subunit, putative
PF3D7_1139300.e2s1_8655	3	PF3D7_1139300	transcription factor with AP2 domain(s) (ApiAP2)
PF3D7_1139300.e2s3_8649	3	PF3D7_1139300	transcription factor with AP2 domain(s) (ApiAP2)
PF3D7_1139500.1.e1s1_5751	3	PF3D7_1139500.1	AAA family ATPase, putative
PF3D7_1146000.1o1_8205	3	PF3D7_1146000	nucleolar preribosomal assembly protein, putative
PF3D7_1149200.e2s1_6829	3	PF3D7_1149200	ring-infected erythrocyte surface antigen
PF3D7_1200400.iso1.exon2.amp1_720	3	PF3D7_1200400	erythrocyte membrane protein 1, PfEMP1
PF3D7_1206900.4o4_7049	3	PF3D7_1206900	conserved Plasmodium protein, unknown function
PF3D7_1219000.iso1.exon1.amp1_seg1_4603	3	PF3D7_1219000	formin 2
PF3D7_1221000.e1s3_4910	3	PF3D7_1221000	histone-lysine N-methyltransferase, H3 lysine-4 specific (SET10)
PF3D7_1222700.1o1_8121	3	PF3D7_1222700	glideosome-associated protein 45 (GAP45)
PF3D7_1224500.2o2_4969	3	PF3D7_1224500	chromatin assembly protein (ASF1), putative
PF3D7_1234800.e1s2_8941	3	PF3D7_1234800	Splicing factor 3B subunit 3, putative (SF3B3)
PF3D7_1236000.1o1_6739	3	PF3D7_1236000	conserved Plasmodium protein, unknown function
PF3D7_1240300.iso1.exon2.amp1_4487	3	PF3D7_1240300	erythrocyte membrane protein 1, PfEMP1
PF3D7_1254700.iso1.exon1.amp1_2440	3	PF3D7_1254700	rifin
PF3D7_1300200.iso1.exon1.amp1_3602	3	PF3D7_1300200	rifin
PF3D7_1300400.iso1.exon2.amp1_1295	3	PF3D7_1300400	rifin
PF3D7_1302700.iso1.exon1.amp2_1069	3	PF3D7_1302700	DEAD/DEAH box ATP-dependent RNA helicase, putative
PF3D7_1311000 (renamed)_8744	3	PF3D7_1311000	conserved Plasmodium protein, unknown function
PF3D7_1322100.iso1.exon1.amp3_3673	3	PF3D7_1322100	SET domain protein, putative
PF3D7_1326200.iso1.exon3.amp1_3867	3	PF3D7_1326200	conserved Plasmodium protein, unknown function
PF3D7_1329000.e1s2_6850	3	PF3D7_1329000	DNA-directed RNA polymerase 3 largest subunit
PF3D7_1334000.iso1.exon1.amp1_1879	3	PF3D7_1334000	conserved Plasmodium protein, unknown function
PF3D7_1338300.e2s1_7486	3	PF3D7_1338300	elongation factor 1-gamma, putative
PF3D7_1348000.iso1.exon1.amp2_1325	3	PF3D7_1348000	conserved Plasmodium protein, unknown function
PF3D7_1351700.iso1.exon3.amp1_3415	3	PF3D7_1351700	alveolin, putative
PF3D7_1353300.iso1.exon1.amp3_4512	3	PF3D7_1353300	conserved Plasmodium protein, unknown function
PF3D7_1356400.iso1.exon1.amp1_4065	3	PF3D7_1356400	phosphatase 2A regulatory subunit-related protein, putative
PF3D7_1406500.iso1.exon2.amp1_1090	3	PF3D7_1406500	conserved Plasmodium protein, unknown function
PF3D7_1410100.1o7_5851	3	PF3D7_1410100	alpha/beta hydrolase, putative
PF3D7_1415000.iso1.exon1.amp1_2734	3	PF3D7_1415000	uracil-DNA glycosylase, putative
PF3D7_1420000.3o3_5002	3	PF3D7_1420000	splicing factor 3B subunit 4, putative (SF3B4)
PF3D7_1438800.4o4_9081	3	PF3D7_1438800	conserved Plasmodium protein, unknown function
PF3D7_1441700.iso1.exon1.amp1_3909	3	PF3D7_1441700	conserved Plasmodium protein, unknown function
PF3D7_1446700.1o8_8122	3	PF3D7_1446700	conserved Plasmodium protein, unknown function
PF3D7_1466200.e1s2_7800	3	PF3D7_1466200	conserved Plasmodium protein, unknown function
PF3D7_1468100.e2s2_5699	3	PF3D7_1468100	conserved Plasmodium protein, unknown function
PF3D7_1473700.iso1.exon1.amp1_251	3	PF3D7_1473700	conserved Plasmodium protein, unknown function
PF3D7_1474000.iso1.exon1.amp3_3078	3	PF3D7_1474000	probable protein, unknown function
PF3D7_1479500.iso1.exon2.amp1_3581	3	PF3D7_1479500	stevor
MAL8P1.143_14o15_5934	3	PF3D7_0803600	conserved Plasmodium protein, unknown function
PF3D7_0108300.s3_7689	3	PF3D7_0108300	conserved Plasmodium protein, unknown function
PF3D7_0110000.1o1_8428	3	PF3D7_0110000	conserved Plasmodium protein, unknown function
PF3D7_0113900.2o2_5532	3	PF3D7_0113900	Plasmodium exported protein (hyp8), unknown function (GEXP10)
PF3D7_0115300.iso1.exon2.amp1_1279	3	PF3D7_0115300	rifin
PF3D7_0209800.e2_6830	3	PF3D7_0209800	ATP-dependent RNA helicase UAP56 (UAP56)
PF3D7_0211100.iso1.exon1.amp2_1349	3	PF3D7_0211100	conserved Plasmodium protein, unknown function
PF3D7_0214300.iso1.exon1.amp1_2559	3	PF3D7_0214300	conserved Plasmodium protein, unknown function
PF3D7_0217400.2o2_6962	3	PF3D7_0217400	conserved Plasmodium protein, unknown function
PF3D7_0219900.2o2_6693	3	PF3D7_0219900	Plasmodium exported protein, unknown function
PF3D7_0222700.iso1.exon2.amp1_1289	3	PF3D7_0222700	rifin
PF3D7_0302000.iso1.exon2.amp1_158	3	PF3D7_0302000	golgi organization and biogenesis factor, putative
PF3D7_0309000.iso1.exon1.amp1_144	3	PF3D7_0309000	dual specificity phosphatase
PF3D7_0310300.e1s2_6327	3	PF3D7_0310300	phosphoglycerate mutase, putative
PF3D7_0316500.e1s1_5735	3	PF3D7_0316500	conserved Plasmodium protein, unknown function
PF3D7_0318500.iso1.exon1.amp5_162	3	PF3D7_0318500	conserved Plasmodium protein, unknown function
PF3D7_0318600.iso1.exon1.amp1_836	3	PF3D7_0318600	cleavage and polyadenylation specifity factor, putative
PF3D7_0416400.iso1.exon2.amp1_1080	3	PF3D7_0416400	histone acetyltransferase, putative
PF3D7_0417100.1o4_5878	3	PF3D7_0417100	RNA binding protein Puf2 (PUF2)
PF3D7_0417400.iso1.exon1.amp6_seg1_1730	3	PF3D7_0417400	conserved Plasmodium protein, unknown function
PF3D7_0422500.e1s3_5652	3	PF3D7_0422500	pre-mRNA-splicing helicase BRR2, putative (BRR2)
PF3D7_0425200.2o2_5531	3	PF3D7_0425200	Plasmodium exported protein (hyp15), unknown function
PF3D7_0511400.1o1_4698	3	PF3D7_0511400	conserved Plasmodium protein, unknown function
PF3D7_0513200.e2s3_5488	3	PF3D7_0513200	conserved Plasmodium protein, unknown function
PF3D7_0518800.iso1.exon7.amp1_2109	3	PF3D7_0518800	secreted ookinete protein, putative
PF3D7_0521600.iso1.exon1.amp1_1810	3	PF3D7_0521600	conserved Plasmodium protein, unknown function
PF3D7_0602100.iso1.exon1.amp2_1960	3	PF3D7_0602100	ATP-dependent RNA helicase, putative
PF3D7_0604000.iso1.exon1.amp3_760	3	PF3D7_0604000	conserved Plasmodium protein, unknown function
PF3D7_0611800.iso1.exon5.amp3_508	3	PF3D7_0611800	conserved Plasmodium protein, unknown function
PF3D7_0615100.1o1_7590	3	PF3D7_0615100	enoyl-acyl carrier reductase (ENR)
PF3D7_0622800.s1 (renamed)_4799	3	PF3D7_0622800	leucyl tRNA synthase
PF3D7_0622800.s2 (renamed)_5666	3	PF3D7_0622800	leucyl tRNA synthase
PF3D7_0632200.iso1.exon1.amp1_3015	3	PF3D7_0632200	rifin
PF3D7_0701900.e2s1_9111	3	PF3D7_0701900	Plasmodium exported protein, unknown function
PF3D7_0704200.iso1.exon1.amp2_769	3	PF3D7_0704200	tRNA m5C-methyltransferase, putative
PF3D7_0709300.iso1.exon1.amp3_2493	3	PF3D7_0709300	Cg2 protein
PF3D7_0709900.e2_7429	3	PF3D7_0709900	conserved Plasmodium membrane protein, unknown function
PF3D7_0713600.iso1.exon1.amp1_3623	3	PF3D7_0713600	mitochondrial ribosomal protein S5 precursor, putative
PF3D7_0713900.e1s3_8249	3	PF3D7_0713900	conserved Plasmodium protein, unknown function
PF3D7_0713900.e1s4_5937	3	PF3D7_0713900	conserved Plasmodium protein, unknown function
PF3D7_0719000.1o1_5524	3	PF3D7_0719000	conserved Plasmodium protein, unknown function
PF3D7_0723900.e1s2_5176	3	PF3D7_0723900	conserved Plasmodium protein, unknown function
PF3D7_0728600.iso1.exon3.amp1_2396	3	PF3D7_0728600	zinc finger, C3HC4 type, putative
PF3D7_0728800.iso1.exon1.amp1_4481	3	PF3D7_0728800	conserved Plasmodium protein, unknown function
PF3D7_0802000.e1s1_5197	3	PF3D7_0802000	glutamate dehydrogenase, putative (GDHc)
PF3D7_0803400.iso1.exon1.amp1_4581	3	PF3D7_0803400	DNA repair protein rad54, putative
PF3D7_0811600.e2s2_7207	3	PF3D7_0811600	conserved Plasmodium protein, unknown function
PF3D7_0817300.e1s3_7500	3	PF3D7_0817300	asparagine-rich antigen
PF3D7_0823300 (renamed, has duplicates)_6432	3	PF3D7_0823300	histone acetyltransferase GCN5 (GCN5)
PF3D7_0828200.iso1.exon1.amp2_1624	3	PF3D7_0828200	leucine--tRNA ligase, putative
PF3D7_0830800.iso1.exon1.amp2_4505	3	PF3D7_0830800	surface-associated interspersed protein 8.2 (SURFIN 8.2)
PF3D7_0830800.iso1.exon2.amp1_1892	3	PF3D7_0830800	surface-associated interspersed protein 8.2 (SURFIN 8.2)
PF3D7_0902200.2o3_7910	3	PF3D7_0902200	serine/threonine protein kinase, FIKK family (FIKK9.3)
PF3D7_0905300.s5_9157	3	PF3D7_0905300	dynein heavy chain, putative
PF3D7_0908300.iso2.exon2.amp1_3507	3	PF3D7_0908300	conserved Plasmodium membrane protein, unknown function
PF3D7_0910200.iso1.exon1.amp1_1395	3	PF3D7_0910200	conserved Plasmodium protein, unknown function
PF3D7_0912800.1o1_8778	3	PF3D7_0912800	tRNA 1-methyladenosine methyltransferase subunit, putative
PF3D7_0915400.e1s1_6348	3	PF3D7_0915400	6-phosphofructokinase (PFK9)
PF3D7_0917900.e2_8279	3	PF3D7_0917900	heat shock protein 70 (Hsp70-2)
PF3D7_0918900.e1s1_7198	3	PF3D7_0918900	gamma-glutamylcysteine synthetase (gammaGCS)
PF3D7_0922500_7709	3	PF3D7_0922500	phosphoglycerate kinase (PGK)
PF3D7_0936800.e2s1_5455	3	PF3D7_0936800	Plasmodium exported protein (PHISTc), unknown function
PF3D7_1000300.iso1.exon1.amp1_3601	3	PF3D7_1000300	rifin
PF3D7_1001600.2o2_4757	3	PF3D7_1001600	alpha/beta hydrolase, putative
PF3D7_1002500.1o3_8986	3	PF3D7_1002500	conserved Plasmodium protein, unknown function
PF3D7_1015900.e2s1_5752	3	PF3D7_1015900	enolase (ENO)
PF3D7_1035300.iso1.exon1.amp1_2847	3	PF3D7_1035300	glutamate-rich protein
PF3D7_1036600.iso2.exon3.amp1_3851	3	PF3D7_1036600	conserved Plasmodium protein, unknown function
PF3D7_1036900.e1s2_5948	3	PF3D7_1036900	conserved Plasmodium protein, unknown function
PF3D7_1106300.2o6_8231	3	PF3D7_1106300	exonuclease, putative
PF3D7_1113000.iso1.exon7.amp3_1351	3	PF3D7_1113000	conserved Plasmodium protein, unknown function
PF3D7_1126400.2o3_5535	3	PF3D7_1126400	large ribosomal subunit processing factor, putative
PF3D7_1127900.3o3_6444	3	PF3D7_1127900	conserved Plasmodium protein, unknown function
PF3D7_1132900.1o1_6392	3	PF3D7_1132900	glycine cleavage H protein (GCVH)
PF3D7_1136200.5o5_9080	3	PF3D7_1136200	conserved Plasmodium protein, unknown function
PF3D7_1140100 (renamed)_5564	3	PF3D7_1140100	vacuolar ATP synthase subunit f, putative
PF3D7_1200500.iso1.exon1.amp1_2436	3	PF3D7_1200500	rifin
PF3D7_1202300.e33s1_5173	3	PF3D7_1202300	dynein heavy chain, putative
PF3D7_1203700.e3_8270	3	PF3D7_1203700	nucleosome assembly protein (NAPL)
PF3D7_1203900 (renamed)_7587	3	PF3D7_1203900	ubiquitin conjugating enzyme E2, putative (UBC)
PF3D7_1212800_6558	3	PF3D7_1212800	iron-sulfur subunit of succinate dehydrogenase
PF3D7_1236200.iso1.exon1.amp2_4226	3	PF3D7_1236200	conserved Plasmodium protein, unknown function
PF3D7_1246300.iso1.exon6.amp1_2708	3	PF3D7_1246300	conserved Plasmodium protein, unknown function
PF3D7_1248000.1o1_9006	3	PF3D7_1248000	conserved Plasmodium protein, unknown function
PF3D7_1248400.iso1.exon1.amp1_2715	3	PF3D7_1248400	conserved Plasmodium protein, unknown function
PF3D7_1250100.e1s1_6645	3	PF3D7_1250100	osmiophilic body protein (Pfg377)
PF3D7_1250800.e2s2_7441	3	PF3D7_1250800	DNA repair protein rhp16, putative
PF3D7_1254500.iso1.exon2.amp1_114	3	PF3D7_1254500	rifin
PF3D7_1301500.2o2_8722	3	PF3D7_1301500	Plasmodium exported protein (PHISTa), unknown function
PF3D7_1302600.1o1_4710	3	PF3D7_1302600	deoxyhypusine hydroxylase (DOHH)
PF3D7_1305300.iso1.exon2.amp1_197	3	PF3D7_1305300	conserved Plasmodium protein, unknown function
PF3D7_1320700.iso1.exon1.amp2_4220	3	PF3D7_1320700	conserved Plasmodium protein, unknown function
PF3D7_1326800.1o1_7308	3	PF3D7_1326800	syntaxin, Qa-SNARE family (SYN18)
PF3D7_1329500.iso1.exon1.amp2_3671	3	PF3D7_1329500	conserved Plasmodium protein, unknown function
PF3D7_1331000.1o1_5311	3	PF3D7_1331000	protein kinase, putative
PF3D7_1332900.e1s1_8365	3	PF3D7_1332900	isoleucine-tRNA ligase, putative
PF3D7_1342600.e3s1_6632	3	PF3D7_1342600	myosin A (MyoA)
PF3D7_1351800.1.1o1_7839	3	PF3D7_1351800.1	conserved Plasmodium protein, unknown function
PF3D7_1356400.iso1.exon1.amp2_3669	3	PF3D7_1356400	phosphatase 2A regulatory subunit-related protein, putative
PF3D7_1368400.iso1.exon6.amp1_2409	3	PF3D7_1368400	conserved Plasmodium protein, unknown function
PF3D7_1419400.e1s1_6636	3	PF3D7_1419400	conserved Plasmodium membrane protein, unknown function
PF3D7_1427600.1o1_7603	3	PF3D7_1427600	CorA-like Mg2 transporter protein, putative
PF3D7_1433800.iso1.exon1.amp3_2788	3	PF3D7_1433800	conserved Plasmodium protein, unknown function
PF3D7_1444100.e7s1_6923	3	PF3D7_1444100	conserved Plasmodium protein, unknown function
PF3D7_1451400.iso1.exon1.amp1_seg1_3165	3	PF3D7_1451400	transcriptional regulatory protein sir2b
PF3D7_1464000.e1s1_6353	3	PF3D7_1464000	YL1 nuclear protein, putative
PF3D7_1466200.e1s3_7511	3	PF3D7_1466200	conserved Plasmodium protein, unknown function
PF3D7_1470500.5o6_7066	3	PF3D7_1470500	phosphodiesterase delta, putative (PDEdelta)

## Sheet: Increased in nonProtected
unique_ID	count_nonprotec_increased	Gene.ID	Description
PF3D7_1133400_6235	24	PF3D7_1133400	apical membrane antigen 1 (AMA1)
PF3D7_0937600.iso1.exon2.amp1_3322	18	PF3D7_0937600	erythrocyte membrane protein 1, PfEMP1
PF3D7_1030200.1o1_4717	18	PF3D7_1030200	conserved Plasmodium protein, unknown function
PF3D7_0223300.iso1.exon2.amp1_3611	17	PF3D7_0223300	erythrocyte membrane protein 1 (PfEMP1), truncated
PF3D7_0317300.s3_7150	17	PF3D7_0317300	conserved Plasmodium protein, unknown function
PF3D7_0420700.e2s1_8336	17	PF3D7_0420700	erythrocyte membrane protein 1, PfEMP1 (VAR)
PF3D7_0808200.e1s1_9217	17	PF3D7_0808200	plasmepsin X
PF3D7_0901800.2o2_8725	17	PF3D7_0901800	Plasmodium exported protein, unknown function
PF3D7_1000200.iso1.exon1.amp1_1575	17	PF3D7_1000200	rifin
PF3D7_1035900.1o1_5890	17	PF3D7_1035900	probable protein, unknown function
PF3D7_1121800.s1_7974	17	PF3D7_1121800	petidase, M16 family
PF3D7_1130200_5980	17	PF3D7_1130200	60S ribosomal protein P0
PF3D7_1305700.1o1_6964	17	PF3D7_1305700	conserved Plasmodium protein, unknown function
PF3D7_1348000.iso1.exon1.amp2_1325	17	PF3D7_1348000	conserved Plasmodium protein, unknown function
PF3D7_1353700.1o1_5245	17	PF3D7_1353700	conserved Plasmodium protein, unknown function
PF3D7_1410400.e1s1_7222	17	PF3D7_1410400	rhoptry-associated protein 1 (RAP1)
PF3D7_1427200.1o2_8707	17	PF3D7_1427200	selenoprotein (Sel4)

## Sheet: Reactive after in Protected
unique_ID	count_protec_after	Gene.ID	Description
PF3D7_0100600.iso1.exon1.amp1_2163	5	PF3D7_0100600	rifin
PF3D7_0102200.e2s2_7188	5	PF3D7_0102200	ring-infected erythrocyte surface antigen (RESA)
PF3D7_0115700.iso1.exon1.amp1_1583	5	PF3D7_0115700	erythrocyte membrane protein 1, PfEMP1
PF3D7_0200100.iso1.exon2.amp1_2746	5	PF3D7_0200100	erythrocyte membrane protein 1, PfEMP1
PF3D7_0201300.iso1.exon2.amp1_119	5	PF3D7_0201300	stevor
PF3D7_0206800_8292	5	PF3D7_0206800	merozoite surface protein 2 (MSP2)
PF3D7_0207000.1o2_6703	5	PF3D7_0207000	merozoite surface protein 4 (MSP4)
PF3D7_0207000.e1_7116	5	PF3D7_0207000	merozoite surface protein 4 (MSP4)
PF3D7_0207700.2o4_5642	5	PF3D7_0207700	serine repeat antigen 4 (SERA4)
PF3D7_0210200.iso1.exon2.amp2_seg1_2597	5	PF3D7_0210200	conserved Plasmodium protein, unknown function
PF3D7_0217700.iso1.exon1.amp1_3848	5	PF3D7_0217700	E2F-associated phosphoprotein, putative
PF3D7_0217900.e1s1_7766	5	PF3D7_0217900	conserved Plasmodium protein, unknown function
PF3D7_0219700.2o2_6131	5	PF3D7_0219700	Plasmodium exported protein (PHISTc), unknown function (GEXP20)
PF3D7_0220000.e2s1_7105	5	PF3D7_0220000	liver stage antigen 3 (LSA3)
PF3D7_0220000.e2s2_7394	5	PF3D7_0220000	liver stage antigen 3 (LSA3)
PF3D7_0223300.iso1.exon2.amp1_3611	5	PF3D7_0223300	erythrocyte membrane protein 1 (PfEMP1), truncated
PF3D7_0300100.iso1.exon2.amp1_138	5	PF3D7_0300100	erythrocyte membrane protein 1, PfEMP1
PF3D7_0301900.1o1_7888	5	PF3D7_0301900	conserved Plasmodium protein, unknown function
PF3D7_0302200.e1_5952	5	PF3D7_0302200	cytoadherence linked asexual protein 3.2 (CLAG3.2)
PF3D7_0302500.e1s1_7185	5	PF3D7_0302500	cytoadherence linked asexual protein 3.1 (CLAG3.1)
PF3D7_0303700.e1s1_6024	5	PF3D7_0303700	dihydrolipoamide acyltransferase, putative
PF3D7_0304600_7131	5	PF3D7_0304600	circumsporozoite (CS) protein (CSP)
PF3D7_0315400.1o1_8147	5	PF3D7_0315400	conserved Plasmodium protein, unknown function
PF3D7_0317300.s3_7150	5	PF3D7_0317300	conserved Plasmodium protein, unknown function
PF3D7_0318200.e1s3_5066	5	PF3D7_0318200	DNA-directed RNA polymerase II, putative
PF3D7_0401000.iso1.exon1.amp1_2432	5	PF3D7_0401000	rifin
PF3D7_0404600.s3_7434	5	PF3D7_0404600	conserved Plasmodium membrane protein, unknown function
PF3D7_0410300.1o2_7946	5	PF3D7_0410300	protein phosphatase, putative
PF3D7_0410900.1o1_6799	5	PF3D7_0410900	conserved Plasmodium protein, unknown function
PF3D7_0412900.iso1.exon1.amp1_435	5	PF3D7_0412900	erythrocyte membrane protein 1, PfEMP1
PF3D7_0420700.e2s1_8336	5	PF3D7_0420700	erythrocyte membrane protein 1, PfEMP1 (VAR)
PF3D7_0421200.iso1.exon2.amp1_3312	5	PF3D7_0421200	rifin
PF3D7_0421300.iso1.exon1.amp1_2739	5	PF3D7_0421300	erythrocyte membrane protein 1, PfEMP1
PF3D7_0422100 (renamed)_7011	5	PF3D7_0422100	transmembrane emp24 domain-containing protein, putative
PF3D7_0425500.iso1.exon1.amp1_1565	5	PF3D7_0425500	stevor
PF3D7_0425800.iso1.exon2.amp1_4183	5	PF3D7_0425800	erythrocyte membrane protein 1, PfEMP1
PF3D7_0500100.iso1.exon2.amp1_1299	5	PF3D7_0500100	erythrocyte membrane protein 1, PfEMP1
PF3D7_0509900.iso1.exon1.amp1_3597	5	PF3D7_0509900	conserved Plasmodium protein, unknown function
PF3D7_0520400.e1s1_6896	5	PF3D7_0520400	conserved Plasmodium protein, unknown function
PF3D7_0524800.iso1.exon1.amp1_2188	5	PF3D7_0524800	ubiquitin fusion degradation protein UFD1, putative
PF3D7_0525800.e1s1_6607	5	PF3D7_0525800	membrane skeletal protein IMC1-related
PF3D7_0526600.iso1.exon1.amp4_3706	5	PF3D7_0526600	conserved Plasmodium protein, unknown function
PF3D7_0530100.2o2_9005	5	PF3D7_0530100	SNARE protein, putative (SYN6)
PF3D7_0532100_6557	5	PF3D7_0532100	early transcribed membrane protein 5 (ETRAMP5)
PF3D7_0600400.iso1.exon1.amp1_3033	5	PF3D7_0600400	erythrocyte membrane protein 1 (PfEMP1)-like protein
PF3D7_0602100.iso1.exon1.amp1_1671	5	PF3D7_0602100	ATP-dependent RNA helicase, putative
PF3D7_0604100.iso1.exon1.amp2_3651	5	PF3D7_0604100	transcription factor with AP2 domain(s)
PF3D7_0606100.iso1.exon4.amp1_4473	5	PF3D7_0606100	RNA binding protein, putative
PF3D7_0608100.iso1.exon1.amp2_2496	5	PF3D7_0608100	conserved Plasmodium protein, unknown function
PF3D7_0628100.iso1.exon1.amp9_1961	5	PF3D7_0628100	HECT-domain (ubiquitin-transferase), putative
PF3D7_0630600.2o2_8237	5	PF3D7_0630600	conserved Plasmodium protein, unknown function
PF3D7_0632500.iso1.exon1.amp1_3326	5	PF3D7_0632500	erythrocyte membrane protein 1, PfEMP1
PF3D7_0700100.iso1.exon3.amp1_1301	5	PF3D7_0700100	erythrocyte membrane protein 1, PfEMP1
PF3D7_0701000.1o1_5806	5	PF3D7_0701000	erythrocyte membrane protein 1 (PfEMP1), pseudogene
PF3D7_0701100.iso1.exon3.amp1_2151	5	PF3D7_0701100	rifin
PF3D7_0703500.e2s2_7503	5	PF3D7_0703500	erythrocyte membrane-associated antigen
PF3D7_0704800.iso1.exon1.amp2_1629	5	PF3D7_0704800	conserved Plasmodium protein, unknown function
PF3D7_0705500.iso1.exon2.amp2_3383	5	PF3D7_0705500	inositol-phosphate phosphatase, putative
PF3D7_0707400.iso1.exon1.amp1_1310	5	PF3D7_0707400	AAA family ATPase, putative
PF3D7_0709400.iso1.exon2.amp1_2171	5	PF3D7_0709400	Cg7 protein
PF3D7_0711700.e2s1_5452	5	PF3D7_0711700	erythrocyte membrane protein 1, PfEMP1 (VAR)
PF3D7_0712000.iso1.exon1.amp1_145	5	PF3D7_0712000	erythrocyte membrane protein 1, PfEMP1
PF3D7_0712300.iso1.exon1.amp1_3615	5	PF3D7_0712300	erythrocyte membrane protein 1, PfEMP1
PF3D7_0712600.iso1.exon1.amp1_434	5	PF3D7_0712600	erythrocyte membrane protein 1, PfEMP1
PF3D7_0712800.iso1.exon1.amp1_3904	5	PF3D7_0712800	erythrocyte membrane protein 1, PfEMP1
PF3D7_0716300.e1s1_8921	5	PF3D7_0716300	conserved Plasmodium protein, unknown function
PF3D7_0719700 (renamed)_9040	5	PF3D7_0719700	40S ribosomal protein S10, putative
PF3D7_0722800.1o1_5891	5	PF3D7_0722800	conserved Plasmodium protein, unknown function
PF3D7_0732000.iso1.exon2.amp1_690	5	PF3D7_0732000	stevor
PF3D7_0732200.iso1.exon2.amp1_1297	5	PF3D7_0732200	rifin
PF3D7_0732700.iso1.exon2.amp1_712	5	PF3D7_0732700	rifin
PF3D7_0800100.iso1.exon1.amp1_723	5	PF3D7_0800100	erythrocyte membrane protein 1, PfEMP1
PF3D7_0800200.e2s1_5745	5	PF3D7_0800200	erythrocyte membrane protein 1, PfEMP1 (VAR)
PF3D7_0800300.e2s1_8914	5	PF3D7_0800300	erythrocyte membrane protein 1, PfEMP1 (VAR)
PF3D7_0808200.e1s1_9217	5	PF3D7_0808200	plasmepsin X
PF3D7_0808600.e2s1_8343	5	PF3D7_0808600	erythrocyte membrane protein 1, PfEMP1 (VAR)
PF3D7_0809100.iso1.exon1.amp1_4184	5	PF3D7_0809100	erythrocyte membrane protein 1, PfEMP1
PF3D7_0815500.3o5_7032	5	PF3D7_0815500	conserved Plasmodium protein, unknown function
PF3D7_0827600.2o2_6223	5	PF3D7_0827600	conserved Plasmodium protein, unknown function
PF3D7_0830800.iso1.exon1.amp1_1373	5	PF3D7_0830800	surface-associated interspersed protein 8.2 (SURFIN 8.2)
PF3D7_0832800.iso1.exon3.amp1_1854	5	PF3D7_0832800	rifin
PF3D7_0832900.iso1.exon3.amp1_986	5	PF3D7_0832900	stevor
PF3D7_0833500.iso1.exon3.amp1_3614	5	PF3D7_0833500	erythrocyte membrane protein 1, PfEMP1
PF3D7_0900100.iso1.exon2.amp1_151	5	PF3D7_0900100	erythrocyte membrane protein 1, PfEMP1
PF3D7_0900500.iso1.exon1.amp1_4464	5	PF3D7_0900500	rifin
PF3D7_0900900.iso1.exon1.amp1_4454	5	PF3D7_0900900	stevor
PF3D7_0901000.iso1.exon1.amp1_3010	5	PF3D7_0901000	rifin
PF3D7_0903500.e1s1_7220	5	PF3D7_0903500	conserved Plasmodium protein, unknown function
PF3D7_0903500.e1s2_7214	5	PF3D7_0903500	conserved Plasmodium protein, unknown function
PF3D7_0905100.iso1.exon3.amp1_1647	5	PF3D7_0905100	nucleoporin NUP100/NSP100, putative
PF3D7_0907700.e1s1_8630	5	PF3D7_0907700	subunit of proteaseome activator complex, putative
PF3D7_0909500_5686	5	PF3D7_0909500	subpellicular microtubule protein 1, putative (SPM1)
PF3D7_0911900.2o2_4716	5	PF3D7_0911900	falstatin (ICP)
PF3D7_0911900.e2_7125	5	PF3D7_0911900	falstatin (ICP)
PF3D7_0923800.1.e1s1_7487	5	PF3D7_0923800.1	thioredoxin reductase (TRXR)
PF3D7_0935900.e2s1_9232	5	PF3D7_0935900	ring-exported protein 1 (REX1)
PF3D7_0936300.2o2_8152	5	PF3D7_0936300	ring-exported protein 3 (REX3)
PF3D7_0937600.iso1.exon2.amp1_3322	5	PF3D7_0937600	erythrocyte membrane protein 1, PfEMP1
PF3D7_0937700.iso1.exon2.amp1_713	5	PF3D7_0937700	rifin
PF3D7_1000100.iso1.exon2.amp1_3908	5	PF3D7_1000100	erythrocyte membrane protein 1, PfEMP1
PF3D7_1000200.iso1.exon1.amp1_1575	5	PF3D7_1000200	rifin
PF3D7_1002100.2o2_7048	5	PF3D7_1002100	PF70 protein (PF70)
PF3D7_1003800.e1s2_7780	5	PF3D7_1003800	U5 small nuclear ribonuclear protein, putative
PF3D7_1007700.e1s2_8091	5	PF3D7_1007700	transcription factor with AP2 domain(s) (ApiAP2)
PF3D7_1012700.e1s1_7980	5	PF3D7_1012700	protein phosphatase, putative
PF3D7_1014100.s1_5371	5	PF3D7_1014100	conserved Plasmodium protein, unknown function
PF3D7_1014100.s2_5660	5	PF3D7_1014100	conserved Plasmodium protein, unknown function
PF3D7_1022000.e2_4806	5	PF3D7_1022000	RNA binding protein, putative
PF3D7_1028700.1o1_8478	5	PF3D7_1028700	merozoite TRAP-like protein (MTRAP)
PF3D7_1030200.1o1_4717	5	PF3D7_1030200	conserved Plasmodium protein, unknown function
PF3D7_1035900.1o1_5890	5	PF3D7_1035900	probable protein, unknown function
PF3D7_1036000.1o1_5293	5	PF3D7_1036000	merozoite surface protein (MSP11)
PF3D7_1037000.iso1.exon3.amp1_4275	5	PF3D7_1037000	DNA polymerase zeta catalytic subunit, putative
PF3D7_1040200.iso1.exon2.amp1_408	5	PF3D7_1040200	stevor
PF3D7_1040900.iso1.exon2.amp1_2143	5	PF3D7_1040900	rifin
PF3D7_1041300.iso1.exon1.amp1_1293	5	PF3D7_1041300	erythrocyte membrane protein 1, PfEMP1
PF3D7_1101200.iso1.exon1.amp1_3319	5	PF3D7_1101200	rifin
PF3D7_1103800.e1s1_7393	5	PF3D7_1103800	CCR4-NOT transcription complex subunit 1, putative (NOT1)
PF3D7_1118200.e1s1_7968	5	PF3D7_1118200	heat shock protein 90, putative
PF3D7_1121800.s1_7974	5	PF3D7_1121800	petidase, M16 family
PF3D7_1133400_6235	5	PF3D7_1133400	apical membrane antigen 1 (AMA1)
PF3D7_1134000.e1s1_6336	5	PF3D7_1134000	heat shock protein 70 (Hsp70-3)
PF3D7_1134700.e2s2_6835	5	PF3D7_1134700	DNA-directed RNA polymerase 1, subunit 2, putative
PF3D7_1150400.iso1.exon2.amp1_714	5	PF3D7_1150400	erythrocyte membrane protein 1, PfEMP1
PF3D7_1200300.e2s1_7189	5	PF3D7_1200300	rifin (RIF)
PF3D7_1201400.iso1.exon1.amp1_218	5	PF3D7_1201400	Plasmodium exported protein, unknown function
PF3D7_1219600.iso1.exon3.amp2_2830	5	PF3D7_1219600	aminophospholipid-transporting P-ATPase
PF3D7_1222600 (renamed, has duplicates)_6843	5	PF3D7_1222600	transcription factor with AP2 domain(s) (ApiAP2)
PF3D7_1235000.iso1.exon3.amp1_650	5	PF3D7_1235000	conserved Plasmodium protein, unknown function
PF3D7_1239800.s5_6570	5	PF3D7_1239800	conserved Plasmodium protein, unknown function
PF3D7_1240400.iso1.exon2.amp1_1013	5	PF3D7_1240400	erythrocyte membrane protein 1, PfEMP1
PF3D7_1240900.iso1.exon3.amp1_1880	5	PF3D7_1240900	erythrocyte membrane protein 1, PfEMP1
PF3D7_1250600_5073	5	PF3D7_1250600	eukaryotic translation initiation factor 2b, subunit 2, putative
PF3D7_1252200.1o1_7010	5	PF3D7_1252200	chitinase (CHT1)
PF3D7_1254000.iso1.exon2.amp1_1000	5	PF3D7_1254000	rifin
PF3D7_1254300.iso1.exon2.amp1_2431	5	PF3D7_1254300	stevor
PF3D7_1254600.iso1.exon2.amp1_2720	5	PF3D7_1254600	stevor
PF3D7_1255200.iso1.exon1.amp1_3324	5	PF3D7_1255200	erythrocyte membrane protein 1, PfEMP1
PF3D7_1300300.s2 (renamed)_7313	5	PF3D7_1300300	erythrocyte membrane protein 1, PfEMP1 (VAR)
PF3D7_1300600.iso1.exon1.amp1_4179	5	PF3D7_1300600	rifin
PF3D7_1300900.iso1.exon1.amp1_4455	5	PF3D7_1300900	stevor
PF3D7_1305700.1o1_6964	5	PF3D7_1305700	conserved Plasmodium protein, unknown function
PF3D7_1321800.1o4_7280	5	PF3D7_1321800	SFT2-like protein, putative
PF3D7_1325900.e1s1_8003	5	PF3D7_1325900	conserved Plasmodium protein, unknown function
PF3D7_1328200.iso1.exon1.amp2_seg1_277	5	PF3D7_1328200	conserved Plasmodium protein, unknown function
PF3D7_1328300.1o3_6129	5	PF3D7_1328300	conserved Plasmodium protein, unknown function
PF3D7_1329200.iso1.exon1.amp1_2427	5	PF3D7_1329200	conserved Plasmodium protein, unknown function
PF3D7_1334200.e1s1_6893	5	PF3D7_1334200	chaperone binding protein, putative
PF3D7_1334400.1o1_8728	5	PF3D7_1334400	MSP7-like protein (MSRP4)
PF3D7_1334800.1o1_8159	5	PF3D7_1334800	MSP7-like protein (MSRP2)
PF3D7_1346400.e1s3_5118	5	PF3D7_1346400	conserved Plasmodium protein, unknown function
PF3D7_1353700.1o1_5245	5	PF3D7_1353700	conserved Plasmodium protein, unknown function
PF3D7_1372800.iso1.exon2.amp1_3009	5	PF3D7_1372800	stevor
PF3D7_1373400.iso1.exon2.amp1_2732	5	PF3D7_1373400	rifin
PF3D7_1373500.iso1.exon1.amp1_2457	5	PF3D7_1373500	erythrocyte membrane protein 1, PfEMP1
PF3D7_1400700.iso1.exon1.amp1_2135	5	PF3D7_1400700	stevor
PF3D7_1407900.e1s1_6608	5	PF3D7_1407900	plasmepsin I (PMI)
PF3D7_1408700.e3s1_8075	5	PF3D7_1408700	conserved Plasmodium protein, unknown function
PF3D7_1410400.e1s1_7222	5	PF3D7_1410400	rhoptry-associated protein 1 (RAP1)
PF3D7_1427200.1o2_8707	5	PF3D7_1427200	selenoprotein (Sel4)
PF3D7_1435300.e1s4_4904	5	PF3D7_1435300	NAD(P)H-dependent glutamate synthase, putative
PF3D7_1448700.1o1_4973	5	PF3D7_1448700	conserved Plasmodium protein, unknown function
PF3D7_1473100.e2s1_8340	5	PF3D7_1473100	GTPase activator, putative
PF3D7_1476500.2o2_5550	5	PF3D7_1476500	probable protein, unknown function
PF3D7_1479400.iso1.exon2.amp1_140	5	PF3D7_1479400	rifin
PF3D7_1479800.iso1.exon2.amp1_4468	5	PF3D7_1479800	rifin
PF3D7_0100100.iso1.exon2.amp1_1871	4	PF3D7_0100100	erythrocyte membrane protein 1, PfEMP1
PF3D7_0100900.iso1.exon1.amp1_2446	4	PF3D7_0100900	rifin
PF3D7_0101300.iso1.exon2.amp1_4146	4	PF3D7_0101300	Pfmc-2TM Maurer's cleft two transmembrane protein
PF3D7_0101600.iso1.exon1.amp1_3887	4	PF3D7_0101600	rifin
PF3D7_0101800.iso1.exon1.amp1_2719	4	PF3D7_0101800	stevor
PF3D7_0102200.e2s1_7477	4	PF3D7_0102200	ring-infected erythrocyte surface antigen (RESA)
PF3D7_0108300.s2_7111	4	PF3D7_0108300	conserved Plasmodium protein, unknown function
PF3D7_0111500.e4s1_8619	4	PF3D7_0111500	UMP-CMP kinase, putative
PF3D7_0112000.3o4_5862	4	PF3D7_0112000	TatD-like deoxyribonuclease, putative
PF3D7_0112100.1o1_6684	4	PF3D7_0112100	conserved Plasmodium protein, unknown function
PF3D7_0113400.2o2_8752	4	PF3D7_0113400	Plasmodium exported protein, unknown function
PF3D7_0113800.2o4_7664	4	PF3D7_0113800	DBL containing protein, unknown function
PF3D7_0115400.iso1.exon2.amp1_2714	4	PF3D7_0115400	stevor
PF3D7_0200400.iso1.exon1.amp1_1275	4	PF3D7_0200400	stevor
PF3D7_0201000.iso1.exon1.amp1_3595	4	PF3D7_0201000	rifin
PF3D7_0201200.iso1.exon2.amp1_3603	4	PF3D7_0201200	rifin
PF3D7_0201800.iso1.exon1.amp1_4451	4	PF3D7_0201800	RESA-like protein with PHIST and DnaJ domains
PF3D7_0203100.e2s2_7084	4	PF3D7_0203100	protein kinase, putative
PF3D7_0207500.e3s1_8088	4	PF3D7_0207500	serine repeat antigen 6 (SERA6)
PF3D7_0207600.e2s1_8341	4	PF3D7_0207600	serine repeat antigen 5 (SERA5)
PF3D7_0214100.e1s1_6246	4	PF3D7_0214100	protein transport protein sec31 (SEC31)
PF3D7_0215700.e2s2_6920	4	PF3D7_0215700	DNA-directed RNA polymerase II second largest subunit, putative
PF3D7_0219600.e1s1_8817	4	PF3D7_0219600	replication factor C subunit 1, putative
PF3D7_0222100.iso1.exon1.amp1_3007	4	PF3D7_0222100	Pfmc-2TM Maurer's cleft two transmembrane protein
PF3D7_0223200.iso1.exon2.amp1_3607	4	PF3D7_0223200	rifin
PF3D7_0223300 (renamed)_6619	4	PF3D7_0223300	erythrocyte membrane protein 1 (PfEMP1), truncated
PF3D7_0223500.iso1.exon1.amp1_3027	4	PF3D7_0223500	erythrocyte membrane protein 1, PfEMP1
PF3D7_0300200.iso1.exon1.amp1_3012	4	PF3D7_0300200	rifin
PF3D7_0300400.iso1.exon1.amp1_401	4	PF3D7_0300400	stevor
PF3D7_0300700.iso1.exon2.amp1_3592	4	PF3D7_0300700	rifin
PF3D7_0302200.1o9_6523	4	PF3D7_0302200	cytoadherence linked asexual protein 3.2 (CLAG3.2)
PF3D7_0307500.iso1.exon4.amp1_417	4	PF3D7_0307500	conserved Plasmodium protein, unknown function
PF3D7_0312400.2o7_8753	4	PF3D7_0312400	glycogen synthase kinase 3 (GSK3)
PF3D7_0324600.iso1.exon2.amp1_3003	4	PF3D7_0324600	stevor (3D7-stevorT3-2)
PF3D7_0324900.iso1.exon1.amp1_2456	4	PF3D7_0324900	erythrocyte membrane protein 1, PfEMP1
PF3D7_0400100.iso1.exon2.amp1_4192	4	PF3D7_0400100	erythrocyte membrane protein 1, PfEMP1
PF3D7_0400200.iso1.exon1.amp1_1876	4	PF3D7_0400200	erythrocyte membrane protein 1 (PfEMP1), exon2
PF3D7_0400400.iso1.exon1.amp1_1294	4	PF3D7_0400400	erythrocyte membrane protein 1, PfEMP1
PF3D7_0400800.iso1.exon1.amp1_3008	4	PF3D7_0400800	stevor
PF3D7_0401900.1o1_7666	4	PF3D7_0401900	acyl-CoA synthetase (ACS6)
PF3D7_0402400.2o2_4672	4	PF3D7_0402400	Plasmodium exported protein, unknown function (GEXP18)
PF3D7_0405300.iso1.exon1.amp1_1116	4	PF3D7_0405300	sequestrin
PF3D7_0407700.e2s2_6343	4	PF3D7_0407700	conserved Plasmodium protein, unknown function
PF3D7_0412400.iso1.exon1.amp1_3330	4	PF3D7_0412400	erythrocyte membrane protein 1, PfEMP1
PF3D7_0412700.iso1.exon1.amp1_2752	4	PF3D7_0412700	erythrocyte membrane protein 1, PfEMP1
PF3D7_0413200.iso1.exon1.amp1_2147	4	PF3D7_0413200	rifin
PF3D7_0415300.iso1.exon1.amp2_3693	4	PF3D7_0415300	cdc2-related protein kinase 3
PF3D7_0424800.2o2_6416	4	PF3D7_0424800	Plasmodium exported protein (PHISTb), unknown function
PF3D7_0425100.2o2_8127	4	PF3D7_0425100	Plasmodium exported protein (hyp6), unknown function
PF3D7_0500500.iso1.exon1.amp1_2721	4	PF3D7_0500500	rifin
PF3D7_0501800.e1s1_4880	4	PF3D7_0501800	chromosome assembly factor 1 (CAF1)
PF3D7_0502400.1o1_5886	4	PF3D7_0502400	ring-stage membrane protein 1,merozoite surface protein 8 (MSP8)
PF3D7_0506300.iso1.exon1.amp1_3900	4	PF3D7_0506300	conserved Plasmodium protein, unknown function
PF3D7_0511400_8865	4	PF3D7_0511400	conserved Plasmodium protein, unknown function
PF3D7_0527200.e2s1_8350	4	PF3D7_0527200	ubiquitin carboxyl-terminal hydrolase, putative
PF3D7_0601200.iso1.exon2.amp1_695	4	PF3D7_0601200	Pfmc-2TM Maurer's cleft two transmembrane protein
PF3D7_0602700.iso1.exon1.amp1_1591	4	PF3D7_0602700	conserved Plasmodium protein, unknown function
PF3D7_0606800.1o1_4981	4	PF3D7_0606800	probable protein, unknown function
PF3D7_0608100.iso1.exon1.amp1_4297	4	PF3D7_0608100	conserved Plasmodium protein, unknown function
PF3D7_0609000.iso1.exon1.amp2_4274	4	PF3D7_0609000	conserved Plasmodium protein, unknown function
PF3D7_0617400.s3 (renamed)_7396	4	PF3D7_0617400	erythrocyte membrane protein 1, PfEMP1 (VAR)
PF3D7_0617600.iso1.exon1.amp1_3292	4	PF3D7_0617600	stevor
PF3D7_0617700.iso1.exon1.amp1_3596	4	PF3D7_0617700	rifin
PF3D7_0620400.1o1_7613	4	PF3D7_0620400	merozoite surface protein 10 (MSP10)
PF3D7_0621400.1o1_8784	4	PF3D7_0621400	Pf77 protein (ALV7)
PF3D7_0625600.1o1_7626	4	PF3D7_0625600	poly(A) polymerase PAP, putative
PF3D7_0626800.iso1.exon3.amp1_689	4	PF3D7_0626800	pyruvate kinase
PF3D7_0631100.iso1.exon2.amp1_1011	4	PF3D7_0631100	Plasmodium exported protein (PHISTb), unknown function
PF3D7_0631400.iso1.exon1.amp1_1562	4	PF3D7_0631400	Pfmc-2TM Maurer's cleft two transmembrane protein
PF3D7_0632300.iso1.exon2.amp1_423	4	PF3D7_0632300	rifin
PF3D7_0632700.iso1.exon2.amp1_2437	4	PF3D7_0632700	rifin
PF3D7_0700400.iso1.exon3.amp1_4165	4	PF3D7_0700400	stevor
PF3D7_0702300.2o2_7331	4	PF3D7_0702300	sporozoite threonine and asparagine-rich protein (STARP)
PF3D7_0703700.e1s1_8629	4	PF3D7_0703700	conserved Plasmodium protein, unknown function
PF3D7_0711100.iso1.exon1.amp1_1552	4	PF3D7_0711100	conserved Plasmodium membrane protein, unknown function
PF3D7_0712400.iso1.exon1.amp1_1004	4	PF3D7_0712400	erythrocyte membrane protein 1, PfEMP1
PF3D7_0712900.iso1.exon1.amp1_3316	4	PF3D7_0712900	erythrocyte membrane protein 1, PfEMP1
PF3D7_0721700_4819	4	PF3D7_0721700	secreted ookinete protein, putative (PSOP1)
PF3D7_0726400.e6s2_4899	4	PF3D7_0726400	conserved Plasmodium membrane protein, unknown function
PF3D7_0731100.2o2_6789	4	PF3D7_0731100	Plasmodium exported protein (PHISTc), unknown function (GEXP11)
PF3D7_0731200.2o2_8439	4	PF3D7_0731200	Plasmodium exported protein, unknown function
PF3D7_0733000.iso1.exon1.amp1_3621	4	PF3D7_0733000	erythrocyte membrane protein 1, PfEMP1
PF3D7_0801000.e2s2_6911	4	PF3D7_0801000	Plasmodium exported protein (PHISTc), unknown function
PF3D7_0803400.iso1.exon1.amp2_3948	4	PF3D7_0803400	DNA repair protein rad54, putative
PF3D7_0818900_4784	4	PF3D7_0818900	heat shock protein 70 (Hsp70)
PF3D7_0825800.iso1.exon1.amp1_1307	4	PF3D7_0825800	conserved Plasmodium protein, unknown function
PF3D7_0826400.iso1.exon6.amp1_665	4	PF3D7_0826400	dehydrodolichyl diphosphate synthetase, putative
PF3D7_0831500.iso1.exon2.amp1_2951	4	PF3D7_0831500	Plasmodium exported protein (PHIST), unknown function
PF3D7_0833300.iso1.exon1.amp1_1870	4	PF3D7_0833300	erythrocyte membrane protein 1 (PfEMP1), exon2
PF3D7_0901500.iso1.exon2.amp1_4476	4	PF3D7_0901500	rifin
PF3D7_0901800.2o2_8725	4	PF3D7_0901800	Plasmodium exported protein, unknown function
PF3D7_0902800.4o4_7941	4	PF3D7_0902800	serine repeat antigen 9 (SERA9)
PF3D7_0906500.1o1_4999	4	PF3D7_0906500	arginase
PF3D7_0909700.iso1.exon1.amp1_1703	4	PF3D7_0909700	FHA domain protein, putative
PF3D7_0918300.e2s1_6599	4	PF3D7_0918300	eukaryotic translation initiation factor 3 subunit 5, putative
PF3D7_0923800.iso2.exon1.amp1_446	4	PF3D7_0923800	thioredoxin reductase
PF3D7_0924600.iso1.exon1.amp1_2177	4	PF3D7_0924600	conserved Plasmodium protein, unknown function
PF3D7_0930300.s2_8884	4	PF3D7_0930300	merozoite surface protein 1 (MSP1)
PF3D7_0933900.4o4_5828	4	PF3D7_0933900	conserved Plasmodium protein, unknown function
PF3D7_0935600.1o2_7901	4	PF3D7_0935600	gametocytogenesis-implicated protein (GIG)
PF3D7_0935800.e9_9148	4	PF3D7_0935800	cytoadherence linked asexual protein 9 (CLAG9)
PF3D7_0937400.iso1.exon2.amp1_1296	4	PF3D7_0937400	rifin
PF3D7_1000500.iso1.exon3.amp1_4465	4	PF3D7_1000500	rifin
PF3D7_1001300.2o2_6130	4	PF3D7_1001300	Plasmodium exported protein (PHISTa), unknown function
PF3D7_1006500.1o1_7278	4	PF3D7_1006500	conserved Plasmodium protein, unknown function
PF3D7_1007300.iso1.exon1.amp1_3315	4	PF3D7_1007300	conserved Plasmodium protein, unknown function
PF3D7_1008000.s2_8597	4	PF3D7_1008000	histone deacetylase, putative
PF3D7_1008100.s1_7726	4	PF3D7_1008100	conserved Plasmodium protein, unknown function
PF3D7_1009000.1o1_8727	4	PF3D7_1009000	diphthine synthase
PF3D7_1017100.1o1_6988	4	PF3D7_1017100	conserved Plasmodium protein, unknown function
PF3D7_1020300.e1s1_7784	4	PF3D7_1020300	cytoplasmic dynein intermediate chain, putative
PF3D7_1021200.1o1_6485	4	PF3D7_1021200	conserved Plasmodium protein, unknown function
PF3D7_1021800.iso1.exon2.amp1_3703	4	PF3D7_1021800	conserved Plasmodium protein, unknown function
PF3D7_1021900.e1s2_5472	4	PF3D7_1021900	conserved Plasmodium protein (10b antigen), unknown function
PF3D7_1023100.e1s6_5941	4	PF3D7_1023100	dynein heavy chain, putative
PF3D7_1024800.e2s2_5767	4	PF3D7_1024800	conserved Plasmodium protein, unknown function
PF3D7_1035100.1o1_8208	4	PF3D7_1035100	probable protein, unknown function
PF3D7_1035800.1o1_5041	4	PF3D7_1035800	probable protein, unknown function
PF3D7_1036400.1o2_6117	4	PF3D7_1036400	liver stage antigen 1 (LSA1)
PF3D7_1036500.1o1_6762	4	PF3D7_1036500	probable protein, unknown function
PF3D7_1039700.iso1.exon1.amp1_1851	4	PF3D7_1039700	Pfmc-2TM Maurer's cleft two transmembrane protein
PF3D7_1040100.iso1.exon2.amp1_3299	4	PF3D7_1040100	rifin
PF3D7_1041000.iso1.exon2.amp1_1280	4	PF3D7_1041000	rifin
PF3D7_1100100.iso1.exon2.amp1_1582	4	PF3D7_1100100	erythrocyte membrane protein 1, PfEMP1
PF3D7_1100300.iso1.exon2.amp1_4474	4	PF3D7_1100300	rifin
PF3D7_1101700.iso1.exon2.amp1_2140	4	PF3D7_1101700	Pfmc-2TM Maurer's cleft two transmembrane protein
PF3D7_1102500.e2s1_5459	4	PF3D7_1102500	Plasmodium exported protein (PHISTb), unknown function (GEXP02)
PF3D7_1102800.iso1.exon1.amp1_671	4	PF3D7_1102800	early transcribed membrane protein 11.2
PF3D7_1113700.e1s1_8346	4	PF3D7_1113700	glyoxalase I (GloI)
PF3D7_1115400.e1s1_6025	4	PF3D7_1115400	cysteine proteinase falcipain 3
PF3D7_1119400.iso1.exon1.amp3_2783	4	PF3D7_1119400	ubiquitin-protein ligase, putative
PF3D7_1121600.iso1.exon2.amp1_2679	4	PF3D7_1121600	circumsporozoite-related antigen
PF3D7_1122800.e1s1_6545	4	PF3D7_1122800	calcium dependent protein kinase 6 (CDPK6)
PF3D7_1122900.e2s5_7132	4	PF3D7_1122900	dynein heavy chain, putative
PF3D7_1123200.iso1.exon1.amp1_3335	4	PF3D7_1123200	leucine-rich repeat protein
PF3D7_1124100.iso1.exon1.amp1_1988	4	PF3D7_1124100	neutral-sphingomyelinase activation factor protein, putative
PF3D7_1128100.2o3_7845	4	PF3D7_1128100	cochaperone prefoldin complex subunit, putative
PF3D7_1130200_5980	4	PF3D7_1130200	60S ribosomal protein P0
PF3D7_1130400_8004	4	PF3D7_1130400	26S proteasome regulatory subunit 6a, putative
PF3D7_1132300.1o1_5547	4	PF3D7_1132300	nucleic acid binding protein, putative
PF3D7_1133700.iso1.exon1.amp1_970	4	PF3D7_1133700	conserved Plasmodium protein, unknown function
PF3D7_1137900.2o2_4737	4	PF3D7_1137900	conserved Plasmodium protein, unknown function
PF3D7_1139300.e2s1_8655	4	PF3D7_1139300	transcription factor with AP2 domain(s) (ApiAP2)
PF3D7_1139300.e2s3_8649	4	PF3D7_1139300	transcription factor with AP2 domain(s) (ApiAP2)
PF3D7_1139500.1.e1s1_5751	4	PF3D7_1139500.1	AAA family ATPase, putative
PF3D7_1146000.1o1_8205	4	PF3D7_1146000	nucleolar preribosomal assembly protein, putative
PF3D7_1149000.s4 (renamed)_8579	4	PF3D7_1149000	antigen 332, DBL-like protein (Pf332)
PF3D7_1149200.e2s1_6829	4	PF3D7_1149200	ring-infected erythrocyte surface antigen
PF3D7_1150200.iso1.exon1.amp1_412	4	PF3D7_1150200	rifin
PF3D7_1200400.iso1.exon2.amp1_720	4	PF3D7_1200400	erythrocyte membrane protein 1, PfEMP1
PF3D7_1201200.2o2_4660	4	PF3D7_1201200	Plasmodium exported protein, unknown function
PF3D7_1201400.iso1.exon1.amp2_2193	4	PF3D7_1201400	Plasmodium exported protein, unknown function
PF3D7_1206900.4o4_7049	4	PF3D7_1206900	conserved Plasmodium protein, unknown function
PF3D7_1216600_6846	4	PF3D7_1216600	cell traversal protein for ookinetes and sporozoites (CelTOS)
PF3D7_1219000.iso1.exon1.amp1_seg1_4603	4	PF3D7_1219000	formin 2
PF3D7_1221000.e1s3_4910	4	PF3D7_1221000	histone-lysine N-methyltransferase, H3 lysine-4 specific (SET10)
PF3D7_1221300.iso1.exon6.amp1_1262	4	PF3D7_1221300	conserved Plasmodium protein, unknown function
PF3D7_1221600.1o1_4708	4	PF3D7_1221600	conserved Plasmodium protein, unknown function
PF3D7_1222700.1o1_8121	4	PF3D7_1222700	glideosome-associated protein 45 (GAP45)
PF3D7_1223600.e1_5670	4	PF3D7_1223600	conserved Plasmodium protein, unknown function
PF3D7_1224500.2o2_4969	4	PF3D7_1224500	chromatin assembly protein (ASF1), putative
PF3D7_1228100.iso1.exon2.amp1_2994	4	PF3D7_1228100	leucine-rich repeat protein
PF3D7_1234800.e1s2_8941	4	PF3D7_1234800	Splicing factor 3B subunit 3, putative (SF3B3)
PF3D7_1236000.1o1_6739	4	PF3D7_1236000	conserved Plasmodium protein, unknown function
PF3D7_1238800.e1s1_6061	4	PF3D7_1238800	acyl-CoA synthetase, PfACS11 (ACS11)
PF3D7_1239700.e1s1_5983	4	PF3D7_1239700	cell division protein FtsH, putative
PF3D7_1240300.iso1.exon2.amp1_4487	4	PF3D7_1240300	erythrocyte membrane protein 1, PfEMP1
PF3D7_1244500.1o1_7349	4	PF3D7_1244500	conserved Plasmodium protein, unknown function
PF3D7_1254700.iso1.exon1.amp1_2440	4	PF3D7_1254700	rifin
PF3D7_1300200.iso1.exon1.amp1_3602	4	PF3D7_1300200	rifin
PF3D7_1300400.iso1.exon2.amp1_1295	4	PF3D7_1300400	rifin
PF3D7_1300500.iso1.exon2.amp1_995	4	PF3D7_1300500	rifin
PF3D7_1302000.2o2_6994	4	PF3D7_1302000	Plasmodium exported protein, unknown function
PF3D7_1302700.iso1.exon1.amp2_1069	4	PF3D7_1302700	DEAD/DEAH box ATP-dependent RNA helicase, putative
PF3D7_1305400.iso1.exon2.amp1_2469	4	PF3D7_1305400	conserved Plasmodium protein, unknown function
PF3D7_1308200.e2s1_7796	4	PF3D7_1308200	carbamoyl phosphate synthetase (cpsSII)
PF3D7_1311000 (renamed)_8744	4	PF3D7_1311000	conserved Plasmodium protein, unknown function
PF3D7_1314500.iso1.exon2.amp1_2631	4	PF3D7_1314500	cop-coated vesicle membrane protein p24 precursor, putative
PF3D7_1322100.iso1.exon1.amp3_3673	4	PF3D7_1322100	SET domain protein, putative
PF3D7_1325500.iso1.exon1.amp1_1897	4	PF3D7_1325500	conserved Plasmodium protein, unknown function
PF3D7_1326200.iso1.exon3.amp1_3867	4	PF3D7_1326200	conserved Plasmodium protein, unknown function
PF3D7_1329000.e1s2_6850	4	PF3D7_1329000	DNA-directed RNA polymerase 3 largest subunit
PF3D7_1329500.iso1.exon3.amp1_730	4	PF3D7_1329500	conserved Plasmodium protein, unknown function
PF3D7_1334000.iso1.exon1.amp1_1879	4	PF3D7_1334000	conserved Plasmodium protein, unknown function
PF3D7_1338300.e2s1_7486	4	PF3D7_1338300	elongation factor 1-gamma, putative
PF3D7_1343400.iso1.exon3.amp2_2487	4	PF3D7_1343400	DNA helicase, putative
PF3D7_1348000.iso1.exon1.amp2_1325	4	PF3D7_1348000	conserved Plasmodium protein, unknown function
PF3D7_1349300.iso1.exon1.amp2_478	4	PF3D7_1349300	serine/threonine protein kinase
PF3D7_1351700.iso1.exon3.amp1_3415	4	PF3D7_1351700	alveolin, putative
PF3D7_1352700.iso1.exon1.amp3_2204	4	PF3D7_1352700	P-loop containing nucleoside triphosphate hydrolase, putative
PF3D7_1353100.e2s1_8339	4	PF3D7_1353100	Plasmodium exported protein, unknown function
PF3D7_1353300.iso1.exon1.amp2_237	4	PF3D7_1353300	conserved Plasmodium protein, unknown function
PF3D7_1353300.iso1.exon1.amp3_4512	4	PF3D7_1353300	conserved Plasmodium protein, unknown function
PF3D7_1356400.iso1.exon1.amp1_4065	4	PF3D7_1356400	phosphatase 2A regulatory subunit-related protein, putative
PF3D7_1361700.e1_7693	4	PF3D7_1361700	cytochrome c oxidase subunit 2, putative
PF3D7_1400300.iso1.exon1.amp1_2146	4	PF3D7_1400300	rifin
PF3D7_1400400.iso1.exon1.amp1_1285	4	PF3D7_1400400	rifin
PF3D7_1405200.iso1.exon1.amp1_3269	4	PF3D7_1405200	sybindin-like protein, putative
PF3D7_1406500.iso1.exon2.amp1_1090	4	PF3D7_1406500	conserved Plasmodium protein, unknown function
PF3D7_1410100.1o7_5851	4	PF3D7_1410100	alpha/beta hydrolase, putative
PF3D7_1414900.iso1.exon1.amp2_3654	4	PF3D7_1414900	ATP-dependent protease, putative
PF3D7_1415000.iso1.exon1.amp1_2734	4	PF3D7_1415000	uracil-DNA glycosylase, putative
PF3D7_1420000.3o3_5002	4	PF3D7_1420000	splicing factor 3B subunit 4, putative (SF3B4)
PF3D7_1436400.e2_8570	4	PF3D7_1436400	conserved Plasmodium protein, unknown function
PF3D7_1438800.4o4_9081	4	PF3D7_1438800	conserved Plasmodium protein, unknown function
PF3D7_1441700.iso1.exon1.amp1_3909	4	PF3D7_1441700	conserved Plasmodium protein, unknown function
PF3D7_1446700.1o2_9003	4	PF3D7_1446700	conserved Plasmodium protein, unknown function
PF3D7_1446700.1o8_8122	4	PF3D7_1446700	conserved Plasmodium protein, unknown function
PF3D7_1452000.s1_6816	4	PF3D7_1452000	rhoptry neck protein 2 (RON2)
PF3D7_1466200.e1s2_7800	4	PF3D7_1466200	conserved Plasmodium protein, unknown function
PF3D7_1468100.e2s2_5699	4	PF3D7_1468100	conserved Plasmodium protein, unknown function
PF3D7_1473700.iso1.exon1.amp1_251	4	PF3D7_1473700	conserved Plasmodium protein, unknown function
PF3D7_1474000.iso1.exon1.amp3_3078	4	PF3D7_1474000	probable protein, unknown function
PF3D7_1475800.1o2_6710	4	PF3D7_1475800	conserved Plasmodium protein, unknown function
PF3D7_1479500.iso1.exon2.amp1_3581	4	PF3D7_1479500	stevor
PF3D7_1479900.iso1.exon2.amp1_2142	4	PF3D7_1479900	stevor
PF3D7_1480000.iso1.exon2.amp1_2445	4	PF3D7_1480000	rifin
MAL8P1.143_14o15_5934	3	PF3D7_0803600	conserved Plasmodium protein, unknown function
PF3D7_0100300.iso1.exon1.amp1_1010	3	PF3D7_0100300	var-like erythrocyte membrane protein 1
PF3D7_0100400.iso1.exon2.amp1_991	3	PF3D7_0100400	rifin
PF3D7_0101900.iso1.exon1.amp1_123	3	PF3D7_0101900	rifin
PF3D7_0104000.3o3_6106	3	PF3D7_0104000	thrombospondin-related sporozoite protein (TRSP)
PF3D7_0104100.2o2_5342	3	PF3D7_0104100	conserved Plasmodium membrane protein, unknown function
PF3D7_0108300.s3_7689	3	PF3D7_0108300	conserved Plasmodium protein, unknown function
PF3D7_0108700.e1s1_7776	3	PF3D7_0108700	secreted ookinete protein, putative (PSOP24)
PF3D7_0108800.iso1.exon6.amp1_1233	3	PF3D7_0108800	conserved Plasmodium protein, unknown function
PF3D7_0110000.1o1_8428	3	PF3D7_0110000	conserved Plasmodium protein, unknown function
PF3D7_0111000.e1s2_6049	3	PF3D7_0111000	kinesin, putative
PF3D7_0112200.iso1.exon1.amp2_183	3	PF3D7_0112200	multidrug resistance-associated protein 1
PF3D7_0113100.iso1.exon2.amp2_3349	3	PF3D7_0113100	surface-associated interspersed protein 1.1 (SURFIN 1.1)
PF3D7_0113900.2o2_5532	3	PF3D7_0113900	Plasmodium exported protein (hyp8), unknown function (GEXP10)
PF3D7_0114100.iso1.exon1.amp1_2718	3	PF3D7_0114100	Pfmc-2TM Maurer's cleft two transmembrane protein
PF3D7_0115200.iso1.exon2.amp1_719	3	PF3D7_0115200	rifin
PF3D7_0115300.iso1.exon2.amp1_1279	3	PF3D7_0115300	rifin
PF3D7_0200100 (renamed)_4770	3	PF3D7_0200100	erythrocyte membrane protein 1, PfEMP1 (VAR)
PF3D7_0200200.iso1.exon1.amp1_1284	3	PF3D7_0200200	rifin
PF3D7_0200600.iso1.exon1.amp1_2442	3	PF3D7_0200600	rifin
PF3D7_0200800.iso1.exon3.amp1_406	3	PF3D7_0200800	erythrocyte membrane protein 1 (PfEMP1), truncated
PF3D7_0202500.1o1_7250	3	PF3D7_0202500	early transcribed membrane protein 2 (ETRAMP2)
PF3D7_0206000.s2_8261	3	PF3D7_0206000	DNA repair endonuclease, putative
PF3D7_0206900.1.1o2_4674	3	PF3D7_0206900.1	merozoite surface protein 5 (MSP5)
PF3D7_0207000.2o2_6414	3	PF3D7_0207000	merozoite surface protein 4 (MSP4)
PF3D7_0207500.e1s1_8609	3	PF3D7_0207500	serine repeat antigen 6 (SERA6)
PF3D7_0209800.e2_6830	3	PF3D7_0209800	ATP-dependent RNA helicase UAP56 (UAP56)
PF3D7_0211100.iso1.exon1.amp2_1349	3	PF3D7_0211100	conserved Plasmodium protein, unknown function
PF3D7_0212200.iso1.exon2.amp1_4153	3	PF3D7_0212200	mitochondrial ribosomal protein L12 precursor, putative
PF3D7_0214300.iso1.exon1.amp1_2559	3	PF3D7_0214300	conserved Plasmodium protein, unknown function
PF3D7_0217400.2o2_6962	3	PF3D7_0217400	conserved Plasmodium protein, unknown function
PF3D7_0219900.2o2_6693	3	PF3D7_0219900	Plasmodium exported protein, unknown function
PF3D7_0222700.iso1.exon2.amp1_1289	3	PF3D7_0222700	rifin
PF3D7_0222900.1o1_4649	3	PF3D7_0222900	erythrocyte membrane protein 1 (PfEMP1), exon2, pseudogene
PF3D7_0301700.e2s1_8045	3	PF3D7_0301700	Plasmodium exported protein, unknown function
PF3D7_0302000.iso1.exon2.amp1_158	3	PF3D7_0302000	golgi organization and biogenesis factor, putative
PF3D7_0302500.e9s1_6314	3	PF3D7_0302500	cytoadherence linked asexual protein 3.1 (CLAG3.1)
PF3D7_0303800.1o1_7036	3	PF3D7_0303800	IBR domain protein, putative
PF3D7_0306200.5o5_6140	3	PF3D7_0306200	activator of Hsp90 ATPase (AHA1)
PF3D7_0309000.iso1.exon1.amp1_144	3	PF3D7_0309000	dual specificity phosphatase
PF3D7_0310300.e1s2_6327	3	PF3D7_0310300	phosphoglycerate mutase, putative
PF3D7_0310500.e1s2_7206	3	PF3D7_0310500	DEAD box helicase, putative
PF3D7_0310500.e1s3_8946	3	PF3D7_0310500	DEAD box helicase, putative
PF3D7_0311400.iso1.exon2.amp1_782	3	PF3D7_0311400	protein kinase, putative
PF3D7_0316500.e1s1_5735	3	PF3D7_0316500	conserved Plasmodium protein, unknown function
PF3D7_0318500.iso1.exon1.amp5_162	3	PF3D7_0318500	conserved Plasmodium protein, unknown function
PF3D7_0318600.iso1.exon1.amp1_836	3	PF3D7_0318600	cleavage and polyadenylation specifity factor, putative
PF3D7_0320200.iso1.exon1.amp1_3627	3	PF3D7_0320200	CPW-WPC family protein
PF3D7_0324100.2o2_5248	3	PF3D7_0324100	Pfmc-2TM Maurer's cleft two transmembrane protein (MC-2TM)
PF3D7_0400500.iso1.exon2.amp1_998	3	PF3D7_0400500	rifin
PF3D7_0401200.iso1.exon2.amp1_2164	3	PF3D7_0401200	rifin
PF3D7_0401300.iso1.exon2.amp1_3599	3	PF3D7_0401300	rifin
PF3D7_0401400.iso1.exon2.amp1_1862	3	PF3D7_0401400	rifin
PF3D7_0402200 (renamed)_8951	3	PF3D7_0402200	surface-associated interspersed gene 4.1, pseudogene (SURFIN4.1) (SURF4.1)
PF3D7_0402600.iso1.exon1.amp1_4449	3	PF3D7_0402600	stevor
PF3D7_0404600.s5_7440	3	PF3D7_0404600	conserved Plasmodium membrane protein, unknown function
PF3D7_0406200_8002	3	PF3D7_0406200	sexual stage-specific protein precursor (Pfs16)
PF3D7_0411700.1o1_4939	3	PF3D7_0411700	conserved Plasmodium protein, unknown function
PF3D7_0413300.iso1.exon2.amp1_707	3	PF3D7_0413300	rifin
PF3D7_0415300.iso1.exon1.amp1_4554	3	PF3D7_0415300	cdc2-related protein kinase 3
PF3D7_0416400.iso1.exon2.amp1_1080	3	PF3D7_0416400	histone acetyltransferase, putative
PF3D7_0417100.1o4_5878	3	PF3D7_0417100	RNA binding protein Puf2 (PUF2)
PF3D7_0417400.iso1.exon1.amp6_seg1_1730	3	PF3D7_0417400	conserved Plasmodium protein, unknown function
PF3D7_0419300.iso1.exon1.amp1_2162	3	PF3D7_0419300	conserved Plasmodium protein, unknown function
PF3D7_0420300.iso1.exon1.amp4_seg1_3445	3	PF3D7_0420300	transcription factor with AP2 domain(s)
PF3D7_0420900.iso1.exon1.amp1_4190	3	PF3D7_0420900	erythrocyte membrane protein 1, PfEMP1
PF3D7_0422500.e1s3_5652	3	PF3D7_0422500	pre-mRNA-splicing helicase BRR2, putative (BRR2)
PF3D7_0423700.1o1_6673	3	PF3D7_0423700	early transcribed membrane protein 4 (ETRAMP4)
PF3D7_0425200.2o2_5531	3	PF3D7_0425200	Plasmodium exported protein (hyp15), unknown function
PF3D7_0425700.iso1.exon1.amp1_4168	3	PF3D7_0425700	rifin
PF3D7_0501200.e2_7703	3	PF3D7_0501200	parasite-infected erythrocyte surface protein (PIESP2)
PF3D7_0501800.e1s2_6042	3	PF3D7_0501800	chromosome assembly factor 1 (CAF1)
PF3D7_0502700.iso1.exon2.amp1_3857	3	PF3D7_0502700	conserved Plasmodium protein, unknown function
PF3D7_0505100.iso1.exon1.amp2_3685	3	PF3D7_0505100	conserved Plasmodium protein, unknown function
PF3D7_0509700.e4s1_9186	3	PF3D7_0509700	conserved Plasmodium protein, unknown function
PF3D7_0510400.1o1_8464	3	PF3D7_0510400	conserved Plasmodium protein, unknown function
PF3D7_0510800.1o1_4938	3	PF3D7_0510800	conserved Plasmodium protein, unknown function
PF3D7_0511400.1o1_4698	3	PF3D7_0511400	conserved Plasmodium protein, unknown function
PF3D7_0511500.s3_7138	3	PF3D7_0511500	RNA pseudouridylate synthase, putative
PF3D7_0513200.e2s3_5488	3	PF3D7_0513200	conserved Plasmodium protein, unknown function
PF3D7_0516600.s2_5122	3	PF3D7_0516600	translation initiation factor IF-2,sporozoite surface antigen MB2 (MB2)
PF3D7_0518800.iso1.exon7.amp1_2109	3	PF3D7_0518800	secreted ookinete protein, putative
PF3D7_0520100.e1s1_8338	3	PF3D7_0520100	protein phosphatase, putative
PF3D7_0521600.iso1.exon1.amp1_1810	3	PF3D7_0521600	conserved Plasmodium protein, unknown function
PF3D7_0522400.e4s2_8874	3	PF3D7_0522400	conserved Plasmodium protein, unknown function
PF3D7_0524500.1o1_5233	3	PF3D7_0524500	conserved Plasmodium protein, unknown function
PF3D7_0530900.iso1.exon1.amp1_818	3	PF3D7_0530900	formin 1
PF3D7_0532300.e2s1_9209	3	PF3D7_0532300	Plasmodium exported protein (PHISTb), unknown function
PF3D7_0533100.iso1.exon1.amp2_3418	3	PF3D7_0533100	erythrocyte membrane protein 1 (PfEMP1), truncated
PF3D7_0600300.iso1.exon1.amp1_1286	3	PF3D7_0600300	rifin
PF3D7_0600500.iso1.exon2.amp1_130	3	PF3D7_0600500	rifin
PF3D7_0600700.iso1.exon1.amp1_4469	3	PF3D7_0600700	rifin
PF3D7_0601500.iso1.exon1.amp1_4480	3	PF3D7_0601500	Plasmodium exported protein (PHISTb), unknown function
PF3D7_0602100.iso1.exon1.amp2_1960	3	PF3D7_0602100	ATP-dependent RNA helicase, putative
PF3D7_0603800.16o20_7091	3	PF3D7_0603800	conserved Plasmodium protein, unknown function
PF3D7_0604000.iso1.exon1.amp3_760	3	PF3D7_0604000	conserved Plasmodium protein, unknown function
PF3D7_0604500.iso1.exon1.amp3_3986	3	PF3D7_0604500	conserved Plasmodium protein, unknown function
PF3D7_0611800.iso1.exon5.amp3_508	3	PF3D7_0611800	conserved Plasmodium protein, unknown function
PF3D7_0615100.1o1_7590	3	PF3D7_0615100	enoyl-acyl carrier reductase (ENR)
PF3D7_0618700.1o2_6708	3	PF3D7_0618700	transport protein particle (TRAPP) component, putative
PF3D7_0618900.iso2.exon2.amp1_2167	3	PF3D7_0618900	N-acetylglucosamine transferase (GPI1)
PF3D7_0620000.1o1_5588	3	PF3D7_0620000	conserved Plasmodium protein, unknown function
PF3D7_0620200.1o1_6128	3	PF3D7_0620200	conserved Plasmodium protein, unknown function
PF3D7_0622800.s1 (renamed)_4799	3	PF3D7_0622800	leucyl tRNA synthase
PF3D7_0622800.s2 (renamed)_5666	3	PF3D7_0622800	leucyl tRNA synthase
PF3D7_0623900.1o1_5269	3	PF3D7_0623900	ribonuclease HII, putative
PF3D7_0625000.iso2.exon1.amp1_1527	3	PF3D7_0625000	phosphatidic acid phosphatase
PF3D7_0626900.1o1_4986	3	PF3D7_0626900	mitochondrial ribosomal protein L46 precursor, putative
PF3D7_0628200.s2 (renamed)_6863	3	PF3D7_0628200	protein kinase PK4 (PK4)
PF3D7_0629300.1o1_7935	3	PF3D7_0629300	phosphatidylcholine-sterol acyltransferase precursor, putative (PL)
PF3D7_0631800.iso1.exon2.amp1_3318	3	PF3D7_0631800	rifin
PF3D7_0631900.iso1.exon2.amp1_3298	3	PF3D7_0631900	stevor
PF3D7_0632000.iso1.exon2.amp1_3020	3	PF3D7_0632000	rifin
PF3D7_0632200.iso1.exon1.amp1_3015	3	PF3D7_0632200	rifin
PF3D7_0632400.iso1.exon2.amp1_3304	3	PF3D7_0632400	rifin
PF3D7_0700200.iso1.exon3.amp1_994	3	PF3D7_0700200	rifin
PF3D7_0700500.iso1.exon3.amp1_2741	3	PF3D7_0700500	rifin
PF3D7_0701600.iso1.exon2.amp1_4435	3	PF3D7_0701600	Pfmc-2TM Maurer's cleft two transmembrane protein
PF3D7_0701800.iso1.exon1.amp1_3301	3	PF3D7_0701800	rifin
PF3D7_0701900.e2s1_9111	3	PF3D7_0701900	Plasmodium exported protein, unknown function
PF3D7_0702200.1o1_5873	3	PF3D7_0702200	lysophospholipase, putative
PF3D7_0702400.e1s1_8040	3	PF3D7_0702400	conserved Plasmodium protein, unknown function
PF3D7_0703100.1o1_5246	3	PF3D7_0703100	conserved Plasmodium protein, unknown function
PF3D7_0704200.iso1.exon1.amp2_769	3	PF3D7_0704200	tRNA m5C-methyltransferase, putative
PF3D7_0704600.iso1.exon5.amp3_seg1_283	3	PF3D7_0704600	ubiquitin transferase, putative
PF3D7_0705000.e1s2_6251	3	PF3D7_0705000	methyltransferase, putative
PF3D7_0705500.iso1.exon2.amp3_1354	3	PF3D7_0705500	inositol-phosphate phosphatase, putative
PF3D7_0707700.1o1_5353	3	PF3D7_0707700	ubiquitin-protein ligase e3, putative
PF3D7_0709300.iso1.exon1.amp3_2493	3	PF3D7_0709300	Cg2 protein
PF3D7_0709700.e1s1_7479	3	PF3D7_0709700	lysophospholipase, putative
PF3D7_0709900.e2_7429	3	PF3D7_0709900	conserved Plasmodium membrane protein, unknown function
PF3D7_0710200.iso1.exon1.amp3_3649	3	PF3D7_0710200	conserved Plasmodium protein, unknown function
PF3D7_0712400.iso1.exon2.amp2_2529	3	PF3D7_0712400	erythrocyte membrane protein 1, PfEMP1
PF3D7_0713600.iso1.exon1.amp1_3623	3	PF3D7_0713600	mitochondrial ribosomal protein S5 precursor, putative
PF3D7_0713900.e1s3_8249	3	PF3D7_0713900	conserved Plasmodium protein, unknown function
PF3D7_0713900.e1s4_5937	3	PF3D7_0713900	conserved Plasmodium protein, unknown function
PF3D7_0717500.e1s1_5155	3	PF3D7_0717500	calcium dependent protein kinase 4 (CDPK4)
PF3D7_0718300.e7s1_4783	3	PF3D7_0718300	cysteine repeat modular protein 2 (CRMP2)
PF3D7_0718600.iso1.exon6.amp1_3617	3	PF3D7_0718600	conserved Plasmodium protein, unknown function
PF3D7_0719000.1o1_5524	3	PF3D7_0719000	conserved Plasmodium protein, unknown function
PF3D7_0723900.e1s2_5176	3	PF3D7_0723900	conserved Plasmodium protein, unknown function
PF3D7_0728600.iso1.exon3.amp1_2396	3	PF3D7_0728600	zinc finger, C3HC4 type, putative
PF3D7_0728800.iso1.exon1.amp1_4481	3	PF3D7_0728800	conserved Plasmodium protein, unknown function
PF3D7_0732900.iso1.exon2.amp1_996	3	PF3D7_0732900	rifin
PF3D7_0800400.iso1.exon3.amp1_128	3	PF3D7_0800400	rifin
PF3D7_0802000.e1s1_5197	3	PF3D7_0802000	glutamate dehydrogenase, putative (GDHc)
PF3D7_0803400.iso1.exon1.amp1_4581	3	PF3D7_0803400	DNA repair protein rad54, putative
PF3D7_0804500.e2s2_5372	3	PF3D7_0804500	conserved Plasmodium membrane protein, unknown function
PF3D7_0806800.e1s1_8932	3	PF3D7_0806800	vacuolar proton translocating ATPase subunit A, putative
PF3D7_0807800.e2s1_6602	3	PF3D7_0807800	proteasome subunit alpha type 5, putative
PF3D7_0808700.iso1.exon1.amp1_3035	3	PF3D7_0808700	erythrocyte membrane protein 1, PfEMP1
PF3D7_0808800.iso1.exon1.amp1_3594	3	PF3D7_0808800	rifin
PF3D7_0811600.e2s2_7207	3	PF3D7_0811600	conserved Plasmodium protein, unknown function
PF3D7_0812700.1o1_7561	3	PF3D7_0812700	RNA-binding protein (U1 snRNP-like), putative
PF3D7_0817300.e1s3_7500	3	PF3D7_0817300	asparagine-rich antigen
PF3D7_0819800.e4s1_8607	3	PF3D7_0819800	conserved Plasmodium protein, unknown function
PF3D7_0821500.1o1_8442	3	PF3D7_0821500	ribosome biogenesis protein nep1 homologue, putative
PF3D7_0823300 (renamed, has duplicates)_6432	3	PF3D7_0823300	histone acetyltransferase GCN5 (GCN5)
PF3D7_0823300.e1s2_7199	3	PF3D7_0823300	histone acetyltransferase GCN5 (GCN5)
PF3D7_0823500.1o1_5877	3	PF3D7_0823500	membrane skeletal protein IMC1-related
PF3D7_0826300.1o1_6730	3	PF3D7_0826300	SPRY domain, putative
PF3D7_0827900.e2_7119	3	PF3D7_0827900	protein disulfide isomerase (PDI8)
PF3D7_0828200.iso1.exon1.amp2_1624	3	PF3D7_0828200	leucine--tRNA ligase, putative
PF3D7_0830800.iso1.exon1.amp2_4505	3	PF3D7_0830800	surface-associated interspersed protein 8.2 (SURFIN 8.2)
PF3D7_0830800.iso1.exon2.amp1_1892	3	PF3D7_0830800	surface-associated interspersed protein 8.2 (SURFIN 8.2)
PF3D7_0831300.2o2_7356	3	PF3D7_0831300	Plasmodium exported protein, unknown function (GEXP13)
PF3D7_0831700.2o2_5026	3	PF3D7_0831700	heat shock protein 70, putative (HSP70-x)
PF3D7_0833000.iso1.exon3.amp1_3881	3	PF3D7_0833000	rifin
PF3D7_0833200.iso1.exon3.amp1_3030	3	PF3D7_0833200	rifin
PF3D7_0900200.e2s1_8924	3	PF3D7_0900200	rifin (RIF)
PF3D7_0900300.iso1.exon1.amp1_1001	3	PF3D7_0900300	rifin
PF3D7_0901300.iso1.exon2.amp1_1859	3	PF3D7_0901300	rifin
PF3D7_0902200.2o3_7910	3	PF3D7_0902200	serine/threonine protein kinase, FIKK family (FIKK9.3)
PF3D7_0903000_5973	3	PF3D7_0903000	conserved protein, unknown function
PF3D7_0903300.iso1.exon1.amp4_1038	3	PF3D7_0903300	conserved Plasmodium membrane protein, unknown function
PF3D7_0903700.e3s1_4884	3	PF3D7_0903700	alpha tubulin 1
PF3D7_0905300.s5_9157	3	PF3D7_0905300	dynein heavy chain, putative
PF3D7_0908300.iso2.exon2.amp1_3507	3	PF3D7_0908300	conserved Plasmodium membrane protein, unknown function
PF3D7_0909100.1o1_4745	3	PF3D7_0909100	conserved Plasmodium membrane protein, unknown function
PF3D7_0909900.iso1.exon1.amp1_1689	3	PF3D7_0909900	helicase with Zn-finger motif, putative
PF3D7_0910200.iso1.exon1.amp1_1395	3	PF3D7_0910200	conserved Plasmodium protein, unknown function
PF3D7_0912800.1o1_8778	3	PF3D7_0912800	tRNA 1-methyladenosine methyltransferase subunit, putative
PF3D7_0915400.e1s1_6348	3	PF3D7_0915400	6-phosphofructokinase (PFK9)
PF3D7_0917900.e2_8279	3	PF3D7_0917900	heat shock protein 70 (Hsp70-2)
PF3D7_0918900.e1s1_7198	3	PF3D7_0918900	gamma-glutamylcysteine synthetase (gammaGCS)
PF3D7_0919800.iso1.exon1.amp1_3111	3	PF3D7_0919800	TLD domain containing protein
PF3D7_0922500_7709	3	PF3D7_0922500	phosphoglycerate kinase (PGK)
PF3D7_0929000.2o2_8472	3	PF3D7_0929000	conserved Plasmodium protein, unknown function
PF3D7_0929000.e2_5102	3	PF3D7_0929000	conserved Plasmodium protein, unknown function
PF3D7_0930300.s1_9167	3	PF3D7_0930300	merozoite surface protein 1 (MSP1)
PF3D7_0930600.iso1.exon5.amp1_2100	3	PF3D7_0930600	peptidyl-prolyl cis-trans isomerase (CYP72)
PF3D7_0936400.2o2_8989	3	PF3D7_0936400	ring-exported protein 4 (REX4)
PF3D7_0936800.e2s1_5455	3	PF3D7_0936800	Plasmodium exported protein (PHISTc), unknown function
PF3D7_0937500.iso1.exon1.amp1_4176	3	PF3D7_0937500	rifin
PF3D7_0937800.iso1.exon1.amp1_2169	3	PF3D7_0937800	erythrocyte membrane protein 1, PfEMP1
PF3D7_1000300.iso1.exon1.amp1_3601	3	PF3D7_1000300	rifin
PF3D7_1001600.2o2_4757	3	PF3D7_1001600	alpha/beta hydrolase, putative
PF3D7_1002500.1o3_8986	3	PF3D7_1002500	conserved Plasmodium protein, unknown function
PF3D7_1011700 (renamed)_6433	3	PF3D7_1011700	DNA repair protein RAD23, putative
PF3D7_1011800.e1s2_7200	3	PF3D7_1011800	QF122 antigen
PF3D7_1014600.e1s3_8257	3	PF3D7_1014600	transcriptional coactivator ADA2 (ADA2)
PF3D7_1015100.1o1_9044	3	PF3D7_1015100	conserved protein, unknown function
PF3D7_1015900.e2s1_5752	3	PF3D7_1015900	enolase (ENO)
PF3D7_1016200.1o1_8491	3	PF3D7_1016200	conserved Plasmodium protein, unknown function
PF3D7_1021000.iso1.exon4.amp1_1510	3	PF3D7_1021000	conserved Plasmodium protein, unknown function
PF3D7_1021700.e1s2_6931	3	PF3D7_1021700	conserved Plasmodium membrane protein, unknown function
PF3D7_1021700.e3s1_8324	3	PF3D7_1021700	conserved Plasmodium membrane protein, unknown function
PF3D7_1021900.e1s3_6056	3	PF3D7_1021900	conserved Plasmodium protein (10b antigen), unknown function
PF3D7_1030700.iso1.exon1.amp1_391	3	PF3D7_1030700	RNA methyltransferase, putative
PF3D7_1032100.iso1.exon1.amp2_4232	3	PF3D7_1032100	mRNA-decapping enzyme subunit 1, putative
PF3D7_1032400.3o7_4720	3	PF3D7_1032400	N-acetylglucosaminyl-phosphatidylinositol biosynthetic protein, putative
PF3D7_1035300.iso1.exon1.amp1_2847	3	PF3D7_1035300	glutamate-rich protein
PF3D7_1035700.e1s1_8948	3	PF3D7_1035700	duffy binding-like merozoite surface protein (DBLMSP)
PF3D7_1036600.iso2.exon3.amp1_3851	3	PF3D7_1036600	conserved Plasmodium protein, unknown function
PF3D7_1036900.e1s2_5948	3	PF3D7_1036900	conserved Plasmodium protein, unknown function
PF3D7_1040300.iso1.exon2.amp1_997	3	PF3D7_1040300	rifin
PF3D7_1040400.iso1.exon2.amp1_2156	3	PF3D7_1040400	rifin
PF3D7_1041100.iso1.exon2.amp1_3013	3	PF3D7_1041100	rifin
PF3D7_1100200.e1s3_7392	3	PF3D7_1100200	erythrocyte membrane protein 1, PfEMP1 (VAR)
PF3D7_1100500.iso1.exon1.amp1_699	3	PF3D7_1100500	rifin
PF3D7_1101300.iso1.exon1.amp1_2434	3	PF3D7_1101300	rifin
PF3D7_1102700.iso1.exon1.amp1_375	3	PF3D7_1102700	early transcribed membrane protein 11.1
PF3D7_1103500.1o13_8994	3	PF3D7_1103500	CPW-WPC family protein
PF3D7_1103500.1o2_7831	3	PF3D7_1103500	CPW-WPC family protein
PF3D7_1106300.2o6_8231	3	PF3D7_1106300	exonuclease, putative
PF3D7_1107400.iso1.exon1.amp1_3598	3	PF3D7_1107400	Rad51 homolog
PF3D7_1107600.iso1.exon1.amp2_3661	3	PF3D7_1107600	conserved Plasmodium protein, unknown function
PF3D7_1109200.3o4_6218	3	PF3D7_1109200	conserved Plasmodium protein, unknown function
PF3D7_1110200.e1s1_4895	3	PF3D7_1110200	pre-mRNA-processing factor 6, putative (PRPF6)
PF3D7_1111800.iso1.exon2.amp1_2710	3	PF3D7_1111800	peptidyl-prolyl cis-trans isomerase, putative
PF3D7_1113000.iso1.exon7.amp3_1351	3	PF3D7_1113000	conserved Plasmodium protein, unknown function
PF3D7_1117800.iso1.exon1.amp1_264	3	PF3D7_1117800	DNA mismatch repair protein MLH
PF3D7_1120300.2o2_8189	3	PF3D7_1120300	metal ion channel - Mg2 , Co2 and Ni2
PF3D7_1124500.1o1_7615	3	PF3D7_1124500	pyruvate dehydrogenase E1 alpha subunit (pdhA)
PF3D7_1125800.1o4_6747	3	PF3D7_1125800	kelch protein, putative
PF3D7_1126400.2o3_5535	3	PF3D7_1126400	large ribosomal subunit processing factor, putative
PF3D7_1127900.3o3_6444	3	PF3D7_1127900	conserved Plasmodium protein, unknown function
PF3D7_1132900.1o1_6392	3	PF3D7_1132900	glycine cleavage H protein (GCVH)
PF3D7_1133200.e1s2_5075	3	PF3D7_1133200	conserved Plasmodium protein, unknown function
PF3D7_1133500.iso1.exon2.amp1_4149	3	PF3D7_1133500	conserved Plasmodium protein, unknown function
PF3D7_1134200.s1_7422	3	PF3D7_1134200	conserved Plasmodium protein, unknown function
PF3D7_1136100.1o1_5019	3	PF3D7_1136100	conserved Plasmodium protein, unknown function
PF3D7_1136200.5o5_9080	3	PF3D7_1136200	conserved Plasmodium protein, unknown function
PF3D7_1136300.e2s1_5389	3	PF3D7_1136300	tudor staphylococcal nuclease (TSN)
PF3D7_1137600 (renamed)_7629	3	PF3D7_1137600	conserved Plasmodium protein, unknown function
PF3D7_1138400.e1s3_5106	3	PF3D7_1138400	guanylyl cyclase (GCalpha)
PF3D7_1138400.e1s4_8575	3	PF3D7_1138400	guanylyl cyclase (GCalpha)
PF3D7_1140100 (renamed)_5564	3	PF3D7_1140100	vacuolar ATP synthase subunit f, putative
PF3D7_1149000.e1s1_5748	3	PF3D7_1149000	antigen 332, DBL-like protein (Pf332)
PF3D7_1149500.e2_6825	3	PF3D7_1149500	ring-infected erythrocyte surface antigen 2, pseudogene (RESA2)
PF3D7_1150000.iso1.exon2.amp1_3314	3	PF3D7_1150000	rifin
PF3D7_1200100.iso1.exon1.amp2_794	3	PF3D7_1200100	erythrocyte membrane protein 1, PfEMP1
PF3D7_1200500.iso1.exon1.amp1_2436	3	PF3D7_1200500	rifin
PF3D7_1202300.e33s1_5173	3	PF3D7_1202300	dynein heavy chain, putative
PF3D7_1203700.e3_8270	3	PF3D7_1203700	nucleosome assembly protein (NAPL)
PF3D7_1203900 (renamed)_7587	3	PF3D7_1203900	ubiquitin conjugating enzyme E2, putative (UBC)
PF3D7_1210600.iso1.exon1.amp1_4021	3	PF3D7_1210600	conserved Plasmodium protein, unknown function
PF3D7_1211000.e3s2_8300	3	PF3D7_1211000	kinesin-like protein, putative
PF3D7_1211900.e1s1_5489	3	PF3D7_1211900	non-SERCA-type Ca2 -transporting P-ATPase (ATP4)
PF3D7_1212800_6558	3	PF3D7_1212800	iron-sulfur subunit of succinate dehydrogenase
PF3D7_1215200.iso1.exon1.amp1_1558	3	PF3D7_1215200	peptidyl-prolyl cis-trans isomerase
PF3D7_1219300.iso1.exon1.amp1_4486	3	PF3D7_1219300	erythrocyte membrane protein 1, PfEMP1
PF3D7_1219600.iso1.exon3.amp1_2541	3	PF3D7_1219600	aminophospholipid-transporting P-ATPase
PF3D7_1221400.e1s1_6610	3	PF3D7_1221400	membrane skeletal protein, putative (ALV3)
PF3D7_1223700.1o2_5258	3	PF3D7_1223700	integral membrane protein, putative
PF3D7_1228600.e1s1_5187	3	PF3D7_1228600	merozoite surface protein 9 (MSP9)
PF3D7_1229600.iso1.exon2.amp2_1093	3	PF3D7_1229600	conserved Plasmodium protein, unknown function
PF3D7_1233700.iso1.exon1.amp1_1031	3	PF3D7_1233700	homocysteine S-methyltransferase, putative
PF3D7_1236200.iso1.exon1.amp2_4226	3	PF3D7_1236200	conserved Plasmodium protein, unknown function
PF3D7_1240300.iso1.exon1.amp2_2520	3	PF3D7_1240300	erythrocyte membrane protein 1, PfEMP1
PF3D7_1240600.iso1.exon2.amp1_2168	3	PF3D7_1240600	erythrocyte membrane protein 1, PfEMP1
PF3D7_1244600.e1s1_6033	3	PF3D7_1244600	ADP-ribosylation factor GTPase-activating protein, putative
PF3D7_1246300.iso1.exon6.amp1_2708	3	PF3D7_1246300	conserved Plasmodium protein, unknown function
PF3D7_1246900.iso1.exon1.amp1_721	3	PF3D7_1246900	RAC-beta serine/threonine protein kinase
PF3D7_1248000.1o1_9006	3	PF3D7_1248000	conserved Plasmodium protein, unknown function
PF3D7_1248400.iso1.exon1.amp1_2715	3	PF3D7_1248400	conserved Plasmodium protein, unknown function
PF3D7_1248800.iso1.exon1.amp1_960	3	PF3D7_1248800	conserved Plasmodium protein, unknown function
PF3D7_1250100.e1s1_6645	3	PF3D7_1250100	osmiophilic body protein (Pfg377)
PF3D7_1250800.e2s2_7441	3	PF3D7_1250800	DNA repair protein rhp16, putative
PF3D7_1254100.e2s1_5739	3	PF3D7_1254100	stevor (stevor)
PF3D7_1254200.iso1.exon2.amp1_1290	3	PF3D7_1254200	rifin
PF3D7_1254400.iso1.exon2.amp1_4171	3	PF3D7_1254400	rifin
PF3D7_1254500.iso1.exon2.amp1_114	3	PF3D7_1254500	rifin
PF3D7_1255100.iso1.exon2.amp1_3024	3	PF3D7_1255100	rifin
PF3D7_1300300.e1s2_5370	3	PF3D7_1300300	erythrocyte membrane protein 1, PfEMP1 (VAR)
PF3D7_1300700.iso1.exon1.amp1_2725	3	PF3D7_1300700	rifin
PF3D7_1300800.iso1.exon3.amp1_3282	3	PF3D7_1300800	erythrocyte membrane protein 1-like
PF3D7_1301500.2o2_8722	3	PF3D7_1301500	Plasmodium exported protein (PHISTa), unknown function
PF3D7_1301600.iso1.exon4.amp2_1680	3	PF3D7_1301600	erythrocyte binding antigen-140
PF3D7_1302600.1o1_4710	3	PF3D7_1302600	deoxyhypusine hydroxylase (DOHH)
PF3D7_1305300.iso1.exon2.amp1_197	3	PF3D7_1305300	conserved Plasmodium protein, unknown function
PF3D7_1310200.2o2_8992	3	PF3D7_1310200	conserved Plasmodium protein, unknown function
PF3D7_1316700.3o3_6177	3	PF3D7_1316700	conserved Plasmodium protein, unknown function
PF3D7_1318400.iso1.exon2.amp1_1380	3	PF3D7_1318400	chromosome segregation protein, putative
PF3D7_1319400 (renamed)_6913	3	PF3D7_1319400	conserved Plasmodium protein, unknown function
PF3D7_1320700.iso1.exon1.amp2_4220	3	PF3D7_1320700	conserved Plasmodium protein, unknown function
PF3D7_1321300.e1s1_7716	3	PF3D7_1321300	conserved Plasmodium membrane protein, unknown function
PF3D7_1322000.1o4_7913	3	PF3D7_1322000	adenosine-diphosphatase, putative
PF3D7_1324800.1o4_5595	3	PF3D7_1324800	dihydrofolate synthase/folylpolyglutamate synthase (DHFS-FPGS)
PF3D7_1326800.1o1_7308	3	PF3D7_1326800	syntaxin, Qa-SNARE family (SYN18)
PF3D7_1329500.iso1.exon1.amp2_3671	3	PF3D7_1329500	conserved Plasmodium protein, unknown function
PF3D7_1331000.1o1_5311	3	PF3D7_1331000	protein kinase, putative
PF3D7_1332900.e1s1_8365	3	PF3D7_1332900	isoleucine-tRNA ligase, putative
PF3D7_1335100_4824	3	PF3D7_1335100	merozoite surface protein 7 (MSP7)
PF3D7_1335300.e1s2_6904	3	PF3D7_1335300	reticulocyte binding protein 2 homologue b (RH2b)
PF3D7_1335400.iso1.exon2.amp2_3988	3	PF3D7_1335400	reticulocyte binding protein 2 homologue a
PF3D7_1339300.1o1_6993	3	PF3D7_1339300	conserved Plasmodium protein, unknown function
PF3D7_1342600.e3s1_6632	3	PF3D7_1342600	myosin A (MyoA)
PF3D7_1343800.iso1.exon1.amp5_seg2_4068	3	PF3D7_1343800	conserved Plasmodium protein, unknown function
PF3D7_1345600.iso1.exon2.amp1_1550	3	PF3D7_1345600	inner membrane complex protein
PF3D7_1347000.iso1.exon1.amp1_3538	3	PF3D7_1347000	G-beta repeat protein, putative
PF3D7_1351800.1.1o1_7839	3	PF3D7_1351800.1	conserved Plasmodium protein, unknown function
PF3D7_1353100.e1s1_6865	3	PF3D7_1353100	Plasmodium exported protein, unknown function
PF3D7_1354100.1o1_8453	3	PF3D7_1354100	conserved Plasmodium protein, unknown function
PF3D7_1356400.iso1.exon1.amp2_3669	3	PF3D7_1356400	phosphatase 2A regulatory subunit-related protein, putative
PF3D7_1357000.e1s1_7180	3	PF3D7_1357000	elongation factor 1-alpha
PF3D7_1358400.iso1.exon3.amp1_1213	3	PF3D7_1358400	conserved Plasmodium protein, unknown function
PF3D7_1359800.iso1.exon3.amp1_672	3	PF3D7_1359800	ADP-ribosylation factor, putative
PF3D7_1368400.iso1.exon6.amp1_2409	3	PF3D7_1368400	conserved Plasmodium protein, unknown function
PF3D7_1373300.iso1.exon2.amp1_4186	3	PF3D7_1373300	rifin
PF3D7_1405400.e4s1_5172	3	PF3D7_1405400	DNA mismatch repair protein, putative
PF3D7_1409300.1o1_4987	3	PF3D7_1409300	DNA-damage inducible protein, putative
PF3D7_1411600.1o1_8493	3	PF3D7_1411600	GTP binding protein, putative
PF3D7_1412200.iso1.exon2.amp1_1899	3	PF3D7_1412200	conserved Plasmodium protein, unknown function
PF3D7_1414600.e1s1_6026	3	PF3D7_1414600	RNA guanylyltransferase (Pgt1)
PF3D7_1417000.1o1_5276	3	PF3D7_1417000	conserved Plasmodium protein, unknown function
PF3D7_1417200.e1s5_9164	3	PF3D7_1417200	NOT family protein, putative
PF3D7_1419400.e1s1_6636	3	PF3D7_1419400	conserved Plasmodium membrane protein, unknown function
PF3D7_1420100.iso1.exon1.amp1_seg1_4604	3	PF3D7_1420100	conserved Plasmodium protein, unknown function
PF3D7_1425600.s2_4821	3	PF3D7_1425600	zinc finger protein, putative
PF3D7_1427600.1o1_7603	3	PF3D7_1427600	CorA-like Mg2 transporter protein, putative
PF3D7_1430300.iso1.exon1.amp1_4287	3	PF3D7_1430300	acid phosphatase, putative
PF3D7_1431100.e1s1_5166	3	PF3D7_1431100	conserved Plasmodium protein, unknown function
PF3D7_1432500.iso1.exon1.amp1_3600	3	PF3D7_1432500	conserved protein, unknown function
PF3D7_1433500.e1s1_5191	3	PF3D7_1433500	DNA topoisomerase II, putative
PF3D7_1433800.iso1.exon1.amp3_2788	3	PF3D7_1433800	conserved Plasmodium protein, unknown function
PF3D7_1434600.e1s1_6046	3	PF3D7_1434600	methionine aminopeptidase 2 (MetAP2)
PF3D7_1436300.e1s1_4792	3	PF3D7_1436300	translocon component PTEX150 (PTEX150)
PF3D7_1440100.iso1.exon1.amp1_553	3	PF3D7_1440100	conserved Plasmodium protein, unknown function
PF3D7_1442600.iso1.exon2.amp2_236	3	PF3D7_1442600	TRAP-like protein
PF3D7_1444100.e6s1_8652	3	PF3D7_1444100	conserved Plasmodium protein, unknown function
PF3D7_1444100.e7s1_6923	3	PF3D7_1444100	conserved Plasmodium protein, unknown function
PF3D7_1448300.s1_7729	3	PF3D7_1448300	conserved Plasmodium protein, unknown function
PF3D7_1451400.iso1.exon1.amp1_seg1_3165	3	PF3D7_1451400	transcriptional regulatory protein sir2b
PF3D7_1451500.1o1_7836	3	PF3D7_1451500	conserved Plasmodium protein, unknown function
PF3D7_1456100.1o1_7024	3	PF3D7_1456100	serine hydroxymethyltransferase, putative (SHMT)
PF3D7_1464000.e1s1_6353	3	PF3D7_1464000	YL1 nuclear protein, putative
PF3D7_1466200.e1s3_7511	3	PF3D7_1466200	conserved Plasmodium protein, unknown function
PF3D7_1468100.e2s1_5410	3	PF3D7_1468100	conserved Plasmodium protein, unknown function
PF3D7_1468300.iso1.exon2.amp1_2138	3	PF3D7_1468300	leucine-rich repeat protein
PF3D7_1469600.e1s1_5128	3	PF3D7_1469600	biotin carboxylase subunit of acetyl CoA carboxylase, putative (ACC1)
PF3D7_1469600.e1s4_8591	3	PF3D7_1469600	biotin carboxylase subunit of acetyl CoA carboxylase, putative (ACC1)
PF3D7_1470100.e1s2_6062	3	PF3D7_1470100	conserved Plasmodium protein, unknown function
PF3D7_1470500.5o6_7066	3	PF3D7_1470500	phosphodiesterase delta, putative (PDEdelta)
PF3D7_1472200.e1s2_8556	3	PF3D7_1472200	histone deacetylase, putative
PF3D7_1478800.2o2_7548	3	PF3D7_1478800	Plasmodium exported protein, unknown function
PF3D7_1479700.iso1.exon2.amp1_4180	3	PF3D7_1479700	rifin

## Sheet: Reactive after in nonProtected
unique_ID	count_nonprotec_after	Gene.ID	Description
PF3D7_0600400.iso1.exon1.amp1_3033	33	PF3D7_0600400	erythrocyte membrane protein 1 (PfEMP1)-like protein
PF3D7_1007700.e1s2_8091	33	PF3D7_1007700	transcription factor with AP2 domain(s) (ApiAP2)
PF3D7_0210200.iso1.exon2.amp2_seg1_2597	32	PF3D7_0210200	conserved Plasmodium protein, unknown function
PF3D7_0315400.1o1_8147	32	PF3D7_0315400	conserved Plasmodium protein, unknown function
PF3D7_0317300.s3_7150	32	PF3D7_0317300	conserved Plasmodium protein, unknown function
PF3D7_0526600.iso1.exon1.amp4_3706	32	PF3D7_0526600	conserved Plasmodium protein, unknown function
PF3D7_0711700.e2s1_5452	32	PF3D7_0711700	erythrocyte membrane protein 1, PfEMP1 (VAR)
PF3D7_1002100.2o2_7048	32	PF3D7_1002100	PF70 protein (PF70)
PF3D7_1121800.s1_7974	32	PF3D7_1121800	petidase, M16 family
PF3D7_1222600 (renamed, has duplicates)_6843	32	PF3D7_1222600	transcription factor with AP2 domain(s) (ApiAP2)
PF3D7_1305700.1o1_6964	32	PF3D7_1305700	conserved Plasmodium protein, unknown function
PF3D7_1321800.1o4_7280	32	PF3D7_1321800	SFT2-like protein, putative
PF3D7_1410400.e1s1_7222	32	PF3D7_1410400	rhoptry-associated protein 1 (RAP1)
PF3D7_0422100 (renamed)_7011	31	PF3D7_0422100	transmembrane emp24 domain-containing protein, putative
PF3D7_0703500.e2s2_7503	31	PF3D7_0703500	erythrocyte membrane-associated antigen
PF3D7_0800300.e2s1_8914	31	PF3D7_0800300	erythrocyte membrane protein 1, PfEMP1 (VAR)
PF3D7_1000200.iso1.exon1.amp1_1575	31	PF3D7_1000200	rifin
PF3D7_0223300.iso1.exon2.amp1_3611	30	PF3D7_0223300	erythrocyte membrane protein 1 (PfEMP1), truncated
PF3D7_0420700.e2s1_8336	30	PF3D7_0420700	erythrocyte membrane protein 1, PfEMP1 (VAR)
PF3D7_0719700 (renamed)_9040	30	PF3D7_0719700	40S ribosomal protein S10, putative
PF3D7_0911900.2o2_4716	30	PF3D7_0911900	falstatin (ICP)
PF3D7_0937600.iso1.exon2.amp1_3322	30	PF3D7_0937600	erythrocyte membrane protein 1, PfEMP1
PF3D7_0401000.iso1.exon1.amp1_2432	29	PF3D7_0401000	rifin
PF3D7_0412900.iso1.exon1.amp1_435	29	PF3D7_0412900	erythrocyte membrane protein 1, PfEMP1
PF3D7_0800200.e2s1_5745	29	PF3D7_0800200	erythrocyte membrane protein 1, PfEMP1 (VAR)
PF3D7_0903500.e1s1_7220	29	PF3D7_0903500	conserved Plasmodium protein, unknown function
PF3D7_1000100.iso1.exon2.amp1_3908	29	PF3D7_1000100	erythrocyte membrane protein 1, PfEMP1
PF3D7_1003800.e1s2_7780	29	PF3D7_1003800	U5 small nuclear ribonuclear protein, putative
PF3D7_1035900.1o1_5890	29	PF3D7_1035900	probable protein, unknown function
PF3D7_1130200_5980	29	PF3D7_1130200	60S ribosomal protein P0
PF3D7_1133400_6235	29	PF3D7_1133400	apical membrane antigen 1 (AMA1)
PF3D7_1134000.e1s1_6336	29	PF3D7_1134000	heat shock protein 70 (Hsp70-3)
PF3D7_1139300.e2s3_8649	29	PF3D7_1139300	transcription factor with AP2 domain(s) (ApiAP2)
PF3D7_1353700.1o1_5245	29	PF3D7_1353700	conserved Plasmodium protein, unknown function
PF3D7_1408700.e3s1_8075	29	PF3D7_1408700	conserved Plasmodium protein, unknown function
PF3D7_0506300.iso1.exon1.amp1_3900	28	PF3D7_0506300	conserved Plasmodium protein, unknown function
PF3D7_0532100_6557	28	PF3D7_0532100	early transcribed membrane protein 5 (ETRAMP5)
PF3D7_0936300.2o2_8152	28	PF3D7_0936300	ring-exported protein 3 (REX3)
PF3D7_1012700.e1s1_7980	28	PF3D7_1012700	protein phosphatase, putative
PF3D7_1328300.1o3_6129	28	PF3D7_1328300	conserved Plasmodium protein, unknown function
PF3D7_1334800.1o1_8159	28	PF3D7_1334800	MSP7-like protein (MSRP2)
PF3D7_1427200.1o2_8707	28	PF3D7_1427200	selenoprotein (Sel4)
PF3D7_0300100.iso1.exon2.amp1_138	27	PF3D7_0300100	erythrocyte membrane protein 1, PfEMP1
PF3D7_0300700.iso1.exon2.amp1_3592	27	PF3D7_0300700	rifin
PF3D7_0302500.e1s1_7185	27	PF3D7_0302500	cytoadherence linked asexual protein 3.1 (CLAG3.1)
PF3D7_0500100.iso1.exon2.amp1_1299	27	PF3D7_0500100	erythrocyte membrane protein 1, PfEMP1
PF3D7_0609000.iso1.exon1.amp2_4274	27	PF3D7_0609000	conserved Plasmodium protein, unknown function
PF3D7_0803400.iso1.exon1.amp2_3948	27	PF3D7_0803400	DNA repair protein rad54, putative
PF3D7_0812700.1o1_7561	27	PF3D7_0812700	RNA-binding protein (U1 snRNP-like), putative
PF3D7_0817300.e1s3_7500	27	PF3D7_0817300	asparagine-rich antigen
PF3D7_0827600.2o2_6223	27	PF3D7_0827600	conserved Plasmodium protein, unknown function
PF3D7_1102500.e2s1_5459	27	PF3D7_1102500	Plasmodium exported protein (PHISTb), unknown function (GEXP02)
PF3D7_1240400.iso1.exon2.amp1_1013	27	PF3D7_1240400	erythrocyte membrane protein 1, PfEMP1
PF3D7_1300300.s2 (renamed)_7313	27	PF3D7_1300300	erythrocyte membrane protein 1, PfEMP1 (VAR)
PF3D7_1322100.iso1.exon1.amp3_3673	27	PF3D7_1322100	SET domain protein, putative
PF3D7_1329500.iso1.exon3.amp1_730	27	PF3D7_1329500	conserved Plasmodium protein, unknown function
PF3D7_1473100.e2s1_8340	27	PF3D7_1473100	GTPase activator, putative
PF3D7_1479800.iso1.exon2.amp1_4468	27	PF3D7_1479800	rifin
PF3D7_0400200.iso1.exon1.amp1_1876	26	PF3D7_0400200	erythrocyte membrane protein 1 (PfEMP1), exon2
PF3D7_0404600.s3_7434	26	PF3D7_0404600	conserved Plasmodium membrane protein, unknown function
PF3D7_0425800.iso1.exon2.amp1_4183	26	PF3D7_0425800	erythrocyte membrane protein 1, PfEMP1
PF3D7_0530100.2o2_9005	26	PF3D7_0530100	SNARE protein, putative (SYN6)
PF3D7_0701000.1o1_5806	26	PF3D7_0701000	erythrocyte membrane protein 1 (PfEMP1), pseudogene
PF3D7_0701100.iso1.exon3.amp1_2151	26	PF3D7_0701100	rifin
PF3D7_0705500.iso1.exon2.amp2_3383	26	PF3D7_0705500	inositol-phosphate phosphatase, putative
PF3D7_0712000.iso1.exon1.amp1_145	26	PF3D7_0712000	erythrocyte membrane protein 1, PfEMP1
PF3D7_0803400.iso1.exon1.amp1_4581	26	PF3D7_0803400	DNA repair protein rad54, putative
PF3D7_0832800.iso1.exon3.amp1_1854	26	PF3D7_0832800	rifin
PF3D7_0903500.e1s2_7214	26	PF3D7_0903500	conserved Plasmodium protein, unknown function
PF3D7_0906500.1o1_4999	26	PF3D7_0906500	arginase
PF3D7_0909500_5686	26	PF3D7_0909500	subpellicular microtubule protein 1, putative (SPM1)
PF3D7_0937700.iso1.exon2.amp1_713	26	PF3D7_0937700	rifin
PF3D7_1452000.s1_6816	26	PF3D7_1452000	rhoptry neck protein 2 (RON2)
PF3D7_0108300.s2_7111	25	PF3D7_0108300	conserved Plasmodium protein, unknown function
PF3D7_0617600.iso1.exon1.amp1_3292	25	PF3D7_0617600	stevor
PF3D7_0713900.e1s4_5937	25	PF3D7_0713900	conserved Plasmodium protein, unknown function
PF3D7_0716300.e1s1_8921	25	PF3D7_0716300	conserved Plasmodium protein, unknown function
PF3D7_0732000.iso1.exon2.amp1_690	25	PF3D7_0732000	stevor
PF3D7_0808200.e1s1_9217	25	PF3D7_0808200	plasmepsin X
PF3D7_0833500.iso1.exon3.amp1_3614	25	PF3D7_0833500	erythrocyte membrane protein 1, PfEMP1
PF3D7_0900100.iso1.exon2.amp1_151	25	PF3D7_0900100	erythrocyte membrane protein 1, PfEMP1
PF3D7_0901000.iso1.exon1.amp1_3010	25	PF3D7_0901000	rifin
PF3D7_0909700.iso1.exon1.amp1_1703	25	PF3D7_0909700	FHA domain protein, putative
PF3D7_0930300.s2_8884	25	PF3D7_0930300	merozoite surface protein 1 (MSP1)
PF3D7_1022000.e2_4806	25	PF3D7_1022000	RNA binding protein, putative
PF3D7_1102800.iso1.exon1.amp1_671	25	PF3D7_1102800	early transcribed membrane protein 11.2
PF3D7_1103800.e1s1_7393	25	PF3D7_1103800	CCR4-NOT transcription complex subunit 1, putative (NOT1)
PF3D7_1239800.s5_6570	25	PF3D7_1239800	conserved Plasmodium protein, unknown function
PF3D7_1254300.iso1.exon2.amp1_2431	25	PF3D7_1254300	stevor
PF3D7_1300200.iso1.exon1.amp1_3602	25	PF3D7_1300200	rifin
PF3D7_1373500.iso1.exon1.amp1_2457	25	PF3D7_1373500	erythrocyte membrane protein 1, PfEMP1
PF3D7_0100600.iso1.exon1.amp1_2163	24	PF3D7_0100600	rifin
PF3D7_0219700.2o2_6131	24	PF3D7_0219700	Plasmodium exported protein (PHISTc), unknown function (GEXP20)
PF3D7_0220000.e2s1_7105	24	PF3D7_0220000	liver stage antigen 3 (LSA3)
PF3D7_0312400.2o7_8753	24	PF3D7_0312400	glycogen synthase kinase 3 (GSK3)
PF3D7_0400400.iso1.exon1.amp1_1294	24	PF3D7_0400400	erythrocyte membrane protein 1, PfEMP1
PF3D7_0410900.1o1_6799	24	PF3D7_0410900	conserved Plasmodium protein, unknown function
PF3D7_0526200.iso2.exon7.amp1_2452	24	PF3D7_0526200	ADP-ribosylation factor GTPase-activating protein, putative
PF3D7_0626900.1o1_4986	24	PF3D7_0626900	mitochondrial ribosomal protein L46 precursor, putative
PF3D7_0628100.iso1.exon1.amp9_1961	24	PF3D7_0628100	HECT-domain (ubiquitin-transferase), putative
PF3D7_0630600.2o2_8237	24	PF3D7_0630600	conserved Plasmodium protein, unknown function
PF3D7_0722800.1o1_5891	24	PF3D7_0722800	conserved Plasmodium protein, unknown function
PF3D7_0726400.e6s2_4899	24	PF3D7_0726400	conserved Plasmodium membrane protein, unknown function
PF3D7_0901800.2o2_8725	24	PF3D7_0901800	Plasmodium exported protein, unknown function
PF3D7_0924600.iso1.exon1.amp1_2177	24	PF3D7_0924600	conserved Plasmodium protein, unknown function
PF3D7_1008100.s1_7726	24	PF3D7_1008100	conserved Plasmodium protein, unknown function
PF3D7_1014100.s2_5660	24	PF3D7_1014100	conserved Plasmodium protein, unknown function
PF3D7_1030200.1o1_4717	24	PF3D7_1030200	conserved Plasmodium protein, unknown function
PF3D7_1040100.iso1.exon2.amp1_3299	24	PF3D7_1040100	rifin
PF3D7_1201400.iso1.exon1.amp1_218	24	PF3D7_1201400	Plasmodium exported protein, unknown function
PF3D7_1348000.iso1.exon1.amp2_1325	24	PF3D7_1348000	conserved Plasmodium protein, unknown function
PF3D7_0112000.3o4_5862	23	PF3D7_0112000	TatD-like deoxyribonuclease, putative
PF3D7_0206800_8292	23	PF3D7_0206800	merozoite surface protein 2 (MSP2)
PF3D7_0223300 (renamed)_6619	23	PF3D7_0223300	erythrocyte membrane protein 1 (PfEMP1), truncated
PF3D7_0302200.e1_5952	23	PF3D7_0302200	cytoadherence linked asexual protein 3.2 (CLAG3.2)
PF3D7_0400800.iso1.exon1.amp1_3008	23	PF3D7_0400800	stevor
PF3D7_0407700.e2s2_6343	23	PF3D7_0407700	conserved Plasmodium protein, unknown function
PF3D7_0423700.1o1_6673	23	PF3D7_0423700	early transcribed membrane protein 4 (ETRAMP4)
PF3D7_0425100.2o2_8127	23	PF3D7_0425100	Plasmodium exported protein (hyp6), unknown function
PF3D7_0602100.iso1.exon1.amp1_1671	23	PF3D7_0602100	ATP-dependent RNA helicase, putative
PF3D7_0604100.iso1.exon1.amp2_3651	23	PF3D7_0604100	transcription factor with AP2 domain(s)
PF3D7_0700100.iso1.exon3.amp1_1301	23	PF3D7_0700100	erythrocyte membrane protein 1, PfEMP1
PF3D7_0707400.iso1.exon1.amp1_1310	23	PF3D7_0707400	AAA family ATPase, putative
PF3D7_0732700.iso1.exon2.amp1_712	23	PF3D7_0732700	rifin
PF3D7_0733000.iso1.exon1.amp1_3621	23	PF3D7_0733000	erythrocyte membrane protein 1, PfEMP1
PF3D7_0815500.3o5_7032	23	PF3D7_0815500	conserved Plasmodium protein, unknown function
PF3D7_0818900_4784	23	PF3D7_0818900	heat shock protein 70 (Hsp70)
PF3D7_1103500.1o2_7831	23	PF3D7_1103500	CPW-WPC family protein
PF3D7_1134700.e2s2_6835	23	PF3D7_1134700	DNA-directed RNA polymerase 1, subunit 2, putative
PF3D7_1138400.e1s4_8575	23	PF3D7_1138400	guanylyl cyclase (GCalpha)
PF3D7_1150400.iso1.exon2.amp1_714	23	PF3D7_1150400	erythrocyte membrane protein 1, PfEMP1
PF3D7_1211900.e1s1_5489	23	PF3D7_1211900	non-SERCA-type Ca2 -transporting P-ATPase (ATP4)
PF3D7_1361700.e1_7693	23	PF3D7_1361700	cytochrome c oxidase subunit 2, putative
PF3D7_1372800.iso1.exon2.amp1_3009	23	PF3D7_1372800	stevor
PF3D7_1400700.iso1.exon1.amp1_2135	23	PF3D7_1400700	stevor
PF3D7_1425600.s2_4821	23	PF3D7_1425600	zinc finger protein, putative
PF3D7_1468100.e2s1_5410	23	PF3D7_1468100	conserved Plasmodium protein, unknown function
PF3D7_0102200.e2s2_7188	22	PF3D7_0102200	ring-infected erythrocyte surface antigen (RESA)
PF3D7_0111500.e4s1_8619	22	PF3D7_0111500	UMP-CMP kinase, putative
PF3D7_0200200.iso1.exon1.amp1_1284	22	PF3D7_0200200	rifin
PF3D7_0201200.iso1.exon2.amp1_3603	22	PF3D7_0201200	rifin
PF3D7_0215700.e2s2_6920	22	PF3D7_0215700	DNA-directed RNA polymerase II second largest subunit, putative
PF3D7_0316500.e1s1_5735	22	PF3D7_0316500	conserved Plasmodium protein, unknown function
PF3D7_0318200.e1s3_5066	22	PF3D7_0318200	DNA-directed RNA polymerase II, putative
PF3D7_0324900.iso1.exon1.amp1_2456	22	PF3D7_0324900	erythrocyte membrane protein 1, PfEMP1
PF3D7_0405300.iso1.exon1.amp1_1116	22	PF3D7_0405300	sequestrin
PF3D7_0500500.iso1.exon1.amp1_2721	22	PF3D7_0500500	rifin
PF3D7_0618700.1o2_6708	22	PF3D7_0618700	transport protein particle (TRAPP) component, putative
PF3D7_0800100.iso1.exon1.amp1_723	22	PF3D7_0800100	erythrocyte membrane protein 1, PfEMP1
PF3D7_0831500.iso1.exon2.amp1_2951	22	PF3D7_0831500	Plasmodium exported protein (PHIST), unknown function
PF3D7_0833300.iso1.exon1.amp1_1870	22	PF3D7_0833300	erythrocyte membrane protein 1 (PfEMP1), exon2
PF3D7_0900900.iso1.exon1.amp1_4454	22	PF3D7_0900900	stevor
PF3D7_1017100.1o1_6988	22	PF3D7_1017100	conserved Plasmodium protein, unknown function
PF3D7_1021200.1o1_6485	22	PF3D7_1021200	conserved Plasmodium protein, unknown function
PF3D7_1021800.iso1.exon2.amp1_3703	22	PF3D7_1021800	conserved Plasmodium protein, unknown function
PF3D7_1035800.1o1_5041	22	PF3D7_1035800	probable protein, unknown function
PF3D7_1125800.1o4_6747	22	PF3D7_1125800	kelch protein, putative
PF3D7_1136300.e2s1_5389	22	PF3D7_1136300	tudor staphylococcal nuclease (TSN)
PF3D7_1221000.e1s3_4910	22	PF3D7_1221000	histone-lysine N-methyltransferase, H3 lysine-4 specific (SET10)
PF3D7_1238800.e1s1_6061	22	PF3D7_1238800	acyl-CoA synthetase, PfACS11 (ACS11)
PF3D7_1250600_5073	22	PF3D7_1250600	eukaryotic translation initiation factor 2b, subunit 2, putative
PF3D7_1255200.iso1.exon1.amp1_3324	22	PF3D7_1255200	erythrocyte membrane protein 1, PfEMP1
PF3D7_1301500.2o2_8722	22	PF3D7_1301500	Plasmodium exported protein (PHISTa), unknown function
PF3D7_1335300.e1s2_6904	22	PF3D7_1335300	reticulocyte binding protein 2 homologue b (RH2b)
PF3D7_1346400.e1s3_5118	22	PF3D7_1346400	conserved Plasmodium protein, unknown function
PF3D7_1353300.iso1.exon1.amp2_237	22	PF3D7_1353300	conserved Plasmodium protein, unknown function
PF3D7_1356400.iso1.exon1.amp1_4065	22	PF3D7_1356400	phosphatase 2A regulatory subunit-related protein, putative
PF3D7_1417200.e1s5_9164	22	PF3D7_1417200	NOT family protein, putative
PF3D7_1430300.iso1.exon1.amp1_4287	22	PF3D7_1430300	acid phosphatase, putative
PF3D7_1435300.e1s4_4904	22	PF3D7_1435300	NAD(P)H-dependent glutamate synthase, putative
PF3D7_1448700.1o1_4973	22	PF3D7_1448700	conserved Plasmodium protein, unknown function
PF3D7_1476500.2o2_5550	22	PF3D7_1476500	probable protein, unknown function
PF3D7_0200600.iso1.exon1.amp1_2442	21	PF3D7_0200600	rifin
PF3D7_0201300.iso1.exon2.amp1_119	21	PF3D7_0201300	stevor
PF3D7_0220000.e2s2_7394	21	PF3D7_0220000	liver stage antigen 3 (LSA3)
PF3D7_0300200.iso1.exon1.amp1_3012	21	PF3D7_0300200	rifin
PF3D7_0300400.iso1.exon1.amp1_401	21	PF3D7_0300400	stevor
PF3D7_0421300.iso1.exon1.amp1_2739	21	PF3D7_0421300	erythrocyte membrane protein 1, PfEMP1
PF3D7_0520400.e1s1_6896	21	PF3D7_0520400	conserved Plasmodium protein, unknown function
PF3D7_0527200.e2s1_8350	21	PF3D7_0527200	ubiquitin carboxyl-terminal hydrolase, putative
PF3D7_0622800.s1 (renamed)_4799	21	PF3D7_0622800	leucyl tRNA synthase
PF3D7_0632700.iso1.exon2.amp1_2437	21	PF3D7_0632700	rifin
PF3D7_0712300.iso1.exon1.amp1_3615	21	PF3D7_0712300	erythrocyte membrane protein 1, PfEMP1
PF3D7_0712800.iso1.exon1.amp1_3904	21	PF3D7_0712800	erythrocyte membrane protein 1, PfEMP1
PF3D7_0712900.iso1.exon1.amp1_3316	21	PF3D7_0712900	erythrocyte membrane protein 1, PfEMP1
PF3D7_0823300 (renamed, has duplicates)_6432	21	PF3D7_0823300	histone acetyltransferase GCN5 (GCN5)
PF3D7_0832900.iso1.exon3.amp1_986	21	PF3D7_0832900	stevor
PF3D7_0905100.iso1.exon3.amp1_1647	21	PF3D7_0905100	nucleoporin NUP100/NSP100, putative
PF3D7_0918300.e2s1_6599	21	PF3D7_0918300	eukaryotic translation initiation factor 3 subunit 5, putative
PF3D7_1101200.iso1.exon1.amp1_3319	21	PF3D7_1101200	rifin
PF3D7_1123200.iso1.exon1.amp1_3335	21	PF3D7_1123200	leucine-rich repeat protein
PF3D7_1212900.e1s1_8355	21	PF3D7_1212900	bromodomain protein, putative
PF3D7_1235000.iso1.exon3.amp1_650	21	PF3D7_1235000	conserved Plasmodium protein, unknown function
PF3D7_1240900.iso1.exon3.amp1_1880	21	PF3D7_1240900	erythrocyte membrane protein 1, PfEMP1
PF3D7_1440100.iso1.exon1.amp1_553	21	PF3D7_1440100	conserved Plasmodium protein, unknown function
PF3D7_0102200.e2s1_7477	20	PF3D7_0102200	ring-infected erythrocyte surface antigen (RESA)
PF3D7_0307500.iso1.exon4.amp1_417	20	PF3D7_0307500	conserved Plasmodium protein, unknown function
PF3D7_0310500.e1s2_7206	20	PF3D7_0310500	DEAD box helicase, putative
PF3D7_0311400.iso1.exon2.amp1_782	20	PF3D7_0311400	protein kinase, putative
PF3D7_0324800.iso1.exon2.amp1_2158	20	PF3D7_0324800	rifin
PF3D7_0501800.e1s1_4880	20	PF3D7_0501800	chromosome assembly factor 1 (CAF1)
PF3D7_0502400.1o1_5886	20	PF3D7_0502400	ring-stage membrane protein 1,merozoite surface protein 8 (MSP8)
PF3D7_0731100.2o2_6789	20	PF3D7_0731100	Plasmodium exported protein (PHISTc), unknown function (GEXP11)
PF3D7_0808600.e2s1_8343	20	PF3D7_0808600	erythrocyte membrane protein 1, PfEMP1 (VAR)
PF3D7_0826300.1o1_6730	20	PF3D7_0826300	SPRY domain, putative
PF3D7_0905400.e7s1_7466	20	PF3D7_0905400	high molecular weight rhoptry protein 3 (RhopH3)
PF3D7_1036400.1o2_6117	20	PF3D7_1036400	liver stage antigen 1 (LSA1)
PF3D7_1041200.iso1.exon2.amp1_2153	20	PF3D7_1041200	rifin
PF3D7_1100100.iso1.exon2.amp1_1582	20	PF3D7_1100100	erythrocyte membrane protein 1, PfEMP1
PF3D7_1100300.iso1.exon2.amp1_4474	20	PF3D7_1100300	rifin
PF3D7_1113700.e1s1_8346	20	PF3D7_1113700	glyoxalase I (GloI)
PF3D7_1219000.iso1.exon1.amp1_seg1_4603	20	PF3D7_1219000	formin 2
PF3D7_1240300.iso1.exon2.amp1_4487	20	PF3D7_1240300	erythrocyte membrane protein 1, PfEMP1
PF3D7_1254600.iso1.exon2.amp1_2720	20	PF3D7_1254600	stevor
PF3D7_1328200.iso1.exon1.amp2_seg1_277	20	PF3D7_1328200	conserved Plasmodium protein, unknown function
PF3D7_1347000.iso1.exon1.amp1_3538	20	PF3D7_1347000	G-beta repeat protein, putative
PF3D7_1373400.iso1.exon2.amp1_2732	20	PF3D7_1373400	rifin
PF3D7_1400300.iso1.exon1.amp1_2146	20	PF3D7_1400300	rifin
PF3D7_1427600.1o1_7603	20	PF3D7_1427600	CorA-like Mg2 transporter protein, putative
PF3D7_1479500.iso1.exon2.amp1_3581	20	PF3D7_1479500	stevor
PF3D7_0101800.iso1.exon1.amp1_2719	19	PF3D7_0101800	stevor
PF3D7_0101900.iso1.exon1.amp1_123	19	PF3D7_0101900	rifin
PF3D7_0200100.iso1.exon2.amp1_2746	19	PF3D7_0200100	erythrocyte membrane protein 1, PfEMP1
PF3D7_0311400.iso1.exon2.amp2_1071	19	PF3D7_0311400	protein kinase, putative
PF3D7_0425500.iso1.exon1.amp1_1565	19	PF3D7_0425500	stevor
PF3D7_0524800.iso1.exon1.amp1_2188	19	PF3D7_0524800	ubiquitin fusion degradation protein UFD1, putative
PF3D7_0600500.iso1.exon2.amp1_130	19	PF3D7_0600500	rifin
PF3D7_0600700.iso1.exon1.amp1_4469	19	PF3D7_0600700	rifin
PF3D7_0620400.1o1_7613	19	PF3D7_0620400	merozoite surface protein 10 (MSP10)
PF3D7_0631800.iso1.exon2.amp1_3318	19	PF3D7_0631800	rifin
PF3D7_0700400.iso1.exon3.amp1_4165	19	PF3D7_0700400	stevor
PF3D7_0709400.iso1.exon2.amp1_2171	19	PF3D7_0709400	Cg7 protein
PF3D7_0731200.2o2_8439	19	PF3D7_0731200	Plasmodium exported protein, unknown function
PF3D7_0821500.1o1_8442	19	PF3D7_0821500	ribosome biogenesis protein nep1 homologue, putative
PF3D7_0826100.s4_8588	19	PF3D7_0826100	E3 ubiquitin-protein ligase, putative
PF3D7_0900500.iso1.exon1.amp1_4464	19	PF3D7_0900500	rifin
PF3D7_1002500.1o3_8986	19	PF3D7_1002500	conserved Plasmodium protein, unknown function
PF3D7_1021900.e1s2_5472	19	PF3D7_1021900	conserved Plasmodium protein (10b antigen), unknown function
PF3D7_1124100.iso1.exon1.amp1_1988	19	PF3D7_1124100	neutral-sphingomyelinase activation factor protein, putative
PF3D7_1125300.iso1.exon1.amp2_3352	19	PF3D7_1125300	DNA-directed RNA polymerase
PF3D7_1127700.1o3_4715	19	PF3D7_1127700	conserved Plasmodium protein, unknown function
PF3D7_1150200.iso1.exon1.amp1_412	19	PF3D7_1150200	rifin
PF3D7_1206900.4o4_7049	19	PF3D7_1206900	conserved Plasmodium protein, unknown function
PF3D7_1213400.e1s1_8061	19	PF3D7_1213400	conserved Plasmodium protein, unknown function
PF3D7_1244500.1o1_7349	19	PF3D7_1244500	conserved Plasmodium protein, unknown function
PF3D7_1252200.1o1_7010	19	PF3D7_1252200	chitinase (CHT1)
PF3D7_1308200.e2s1_7796	19	PF3D7_1308200	carbamoyl phosphate synthetase (cpsSII)
PF3D7_1314500.iso1.exon2.amp1_2631	19	PF3D7_1314500	cop-coated vesicle membrane protein p24 precursor, putative
PF3D7_1317200.iso1.exon1.amp1_3709	19	PF3D7_1317200	transcription factor with AP2 domain(s)
PF3D7_1346900.1o1_6406	19	PF3D7_1346900	conserved Plasmodium protein, unknown function
PF3D7_1353300.iso1.exon1.amp3_4512	19	PF3D7_1353300	conserved Plasmodium protein, unknown function
PF3D7_1400400.iso1.exon1.amp1_1285	19	PF3D7_1400400	rifin
PF3D7_1406500.iso1.exon2.amp1_1090	19	PF3D7_1406500	conserved Plasmodium protein, unknown function
PF3D7_1417200.e1s1_5409	19	PF3D7_1417200	NOT family protein, putative
PF3D7_1420300.1o1_6999	19	PF3D7_1420300	zinc finger protein, putative
PF3D7_1441700.iso1.exon1.amp1_3909	19	PF3D7_1441700	conserved Plasmodium protein, unknown function
PF3D7_0103900.1o1_9076	18	PF3D7_0103900	parasite-infected erythrocyte surface protein (PIEPS15)
PF3D7_0108300.s3_7689	18	PF3D7_0108300	conserved Plasmodium protein, unknown function
PF3D7_0115700.iso1.exon1.amp1_1583	18	PF3D7_0115700	erythrocyte membrane protein 1, PfEMP1
PF3D7_0202500.1o1_7250	18	PF3D7_0202500	early transcribed membrane protein 2 (ETRAMP2)
PF3D7_0206900.1.1o2_4674	18	PF3D7_0206900.1	merozoite surface protein 5 (MSP5)
PF3D7_0207500.e3s1_8088	18	PF3D7_0207500	serine repeat antigen 6 (SERA6)
PF3D7_0222100.iso1.exon1.amp1_3007	18	PF3D7_0222100	Pfmc-2TM Maurer's cleft two transmembrane protein
PF3D7_0222500.iso1.exon2.amp1_987	18	PF3D7_0222500	rifin
PF3D7_0308000.1o1_8767	18	PF3D7_0308000	DNA polymerase epsilon subunit b, putative
PF3D7_0308700.iso1.exon1.amp1_2745	18	PF3D7_0308700	conserved Plasmodium protein, unknown function
PF3D7_0401900.1o1_7666	18	PF3D7_0401900	acyl-CoA synthetase (ACS6)
PF3D7_0404600.s5_7440	18	PF3D7_0404600	conserved Plasmodium membrane protein, unknown function
PF3D7_0500900.iso1.exon2.amp1_442	18	PF3D7_0500900	serine/threonine protein kinase, FIKK family
PF3D7_0617700.iso1.exon1.amp1_3596	18	PF3D7_0617700	rifin
PF3D7_0629700.s5 (renamed)_7727	18	PF3D7_0629700	SET domain protein, putative (SET1)
PF3D7_0631900.iso1.exon2.amp1_3298	18	PF3D7_0631900	stevor
PF3D7_0712600.iso1.exon1.amp1_434	18	PF3D7_0712600	erythrocyte membrane protein 1, PfEMP1
PF3D7_0808700.iso1.exon1.amp1_3035	18	PF3D7_0808700	erythrocyte membrane protein 1, PfEMP1
PF3D7_0823500.1o1_5877	18	PF3D7_0823500	membrane skeletal protein IMC1-related
PF3D7_0825800.iso1.exon1.amp1_1307	18	PF3D7_0825800	conserved Plasmodium protein, unknown function
PF3D7_0833000.iso1.exon3.amp1_3881	18	PF3D7_0833000	rifin
PF3D7_0905300.s6_8296	18	PF3D7_0905300	dynein heavy chain, putative
PF3D7_0935800.e9_9148	18	PF3D7_0935800	cytoadherence linked asexual protein 9 (CLAG9)
PF3D7_1001500.1o1_6967	18	PF3D7_1001500	early transcribed membrane protein 10.1 (ETRAMP10)
PF3D7_1007700.e1s1_6640	18	PF3D7_1007700	transcription factor with AP2 domain(s) (ApiAP2)
PF3D7_1028700.1o1_8478	18	PF3D7_1028700	merozoite TRAP-like protein (MTRAP)
PF3D7_1032100.iso1.exon1.amp2_4232	18	PF3D7_1032100	mRNA-decapping enzyme subunit 1, putative
PF3D7_1036900.e1s2_5948	18	PF3D7_1036900	conserved Plasmodium protein, unknown function
PF3D7_1040200.iso1.exon2.amp1_408	18	PF3D7_1040200	stevor
PF3D7_1040300.iso1.exon2.amp1_997	18	PF3D7_1040300	rifin
PF3D7_1107400.iso1.exon1.amp1_3598	18	PF3D7_1107400	Rad51 homolog
PF3D7_1115400.e1s1_6025	18	PF3D7_1115400	cysteine proteinase falcipain 3
PF3D7_1122800.e1s1_6545	18	PF3D7_1122800	calcium dependent protein kinase 6 (CDPK6)
PF3D7_1129800.1o1_9026	18	PF3D7_1129800	conserved Plasmodium protein, unknown function
PF3D7_1130400_8004	18	PF3D7_1130400	26S proteasome regulatory subunit 6a, putative
PF3D7_1137600 (renamed)_7629	18	PF3D7_1137600	conserved Plasmodium protein, unknown function
PF3D7_1139500.1.e1s1_5751	18	PF3D7_1139500.1	AAA family ATPase, putative
PF3D7_1146800.e3s1_4831	18	PF3D7_1146800	conserved Plasmodium protein, unknown function
PF3D7_1236000.1o1_6739	18	PF3D7_1236000	conserved Plasmodium protein, unknown function
PF3D7_1248000.1o1_9006	18	PF3D7_1248000	conserved Plasmodium protein, unknown function
PF3D7_1248800.iso1.exon1.amp1_960	18	PF3D7_1248800	conserved Plasmodium protein, unknown function
PF3D7_1300400.iso1.exon2.amp1_1295	18	PF3D7_1300400	rifin
PF3D7_1329000.e1s2_6850	18	PF3D7_1329000	DNA-directed RNA polymerase 3 largest subunit
PF3D7_1348800.2o4_7958	18	PF3D7_1348800	E1-E2 ATPase, putative
PF3D7_1405400.e4s1_5172	18	PF3D7_1405400	DNA mismatch repair protein, putative
PF3D7_1448300.s1_7729	18	PF3D7_1448300	conserved Plasmodium protein, unknown function
PF3D7_1479400.iso1.exon2.amp1_140	18	PF3D7_1479400	rifin
PF3D7_0100900.iso1.exon1.amp1_2446	17	PF3D7_0100900	rifin
PF3D7_0211200.1o1_7850	17	PF3D7_0211200	Rab GTPase 5a (RAB5a)
PF3D7_0220100.e2s1_7661	17	PF3D7_0220100	DnaJ protein, putative
PF3D7_0303700.e1s1_6024	17	PF3D7_0303700	dihydrolipoamide acyltransferase, putative
PF3D7_0401400.iso1.exon2.amp1_1862	17	PF3D7_0401400	rifin
PF3D7_0424800.2o2_6416	17	PF3D7_0424800	Plasmodium exported protein (PHISTb), unknown function
PF3D7_0511400_8865	17	PF3D7_0511400	conserved Plasmodium protein, unknown function
PF3D7_0516400.1o1_9029	17	PF3D7_0516400	conserved Plasmodium protein, unknown function
PF3D7_0606800.1o1_4981	17	PF3D7_0606800	probable protein, unknown function
PF3D7_0617400.s3 (renamed)_7396	17	PF3D7_0617400	erythrocyte membrane protein 1, PfEMP1 (VAR)
PF3D7_0625400.1o1_5288	17	PF3D7_0625400	conserved Plasmodium protein, unknown function
PF3D7_0628200.s2 (renamed)_6863	17	PF3D7_0628200	protein kinase PK4 (PK4)
PF3D7_0632200.iso1.exon1.amp1_3015	17	PF3D7_0632200	rifin
PF3D7_0632400.iso1.exon2.amp1_3304	17	PF3D7_0632400	rifin
PF3D7_0712400.iso1.exon1.amp1_1004	17	PF3D7_0712400	erythrocyte membrane protein 1, PfEMP1
PF3D7_0807800.e2s1_6602	17	PF3D7_0807800	proteasome subunit alpha type 5, putative
PF3D7_0811600.e2s2_7207	17	PF3D7_0811600	conserved Plasmodium protein, unknown function
PF3D7_0903700.e3s1_4884	17	PF3D7_0903700	alpha tubulin 1
PF3D7_0911900.e2_7125	17	PF3D7_0911900	falstatin (ICP)
PF3D7_0915400.e1s1_6348	17	PF3D7_0915400	6-phosphofructokinase (PFK9)
PF3D7_0937400.iso1.exon2.amp1_1296	17	PF3D7_0937400	rifin
PF3D7_1011700 (renamed)_6433	17	PF3D7_1011700	DNA repair protein RAD23, putative
PF3D7_1015900.e2s1_5752	17	PF3D7_1015900	enolase (ENO)
PF3D7_1037000.iso1.exon3.amp1_4275	17	PF3D7_1037000	DNA polymerase zeta catalytic subunit, putative
PF3D7_1041300.iso1.exon1.amp1_1293	17	PF3D7_1041300	erythrocyte membrane protein 1, PfEMP1
PF3D7_1101700.iso1.exon2.amp1_2140	17	PF3D7_1101700	Pfmc-2TM Maurer's cleft two transmembrane protein
PF3D7_1111800.iso1.exon2.amp1_2710	17	PF3D7_1111800	peptidyl-prolyl cis-trans isomerase, putative
PF3D7_1136900.e1s1_7134	17	PF3D7_1136900	subtilisin-like protease 2 (SUB2)
PF3D7_1200400.iso1.exon2.amp1_720	17	PF3D7_1200400	erythrocyte membrane protein 1, PfEMP1
PF3D7_1208800.e1s1_6623	17	PF3D7_1208800	zinc finger protein, putative
PF3D7_1221600.1o1_4708	17	PF3D7_1221600	conserved Plasmodium protein, unknown function
PF3D7_1223600.e1_5670	17	PF3D7_1223600	conserved Plasmodium protein, unknown function
PF3D7_1224500.2o2_4969	17	PF3D7_1224500	chromatin assembly protein (ASF1), putative
PF3D7_1229600.iso1.exon2.amp2_1093	17	PF3D7_1229600	conserved Plasmodium protein, unknown function
PF3D7_1239700.e1s1_5983	17	PF3D7_1239700	cell division protein FtsH, putative
PF3D7_1300300.e2s1_8353	17	PF3D7_1300300	erythrocyte membrane protein 1, PfEMP1 (VAR)
PF3D7_1300900.iso1.exon1.amp1_4455	17	PF3D7_1300900	stevor
PF3D7_1311000 (renamed)_8744	17	PF3D7_1311000	conserved Plasmodium protein, unknown function
PF3D7_1355500.1o1_6760	17	PF3D7_1355500	serine/threonine protein phosphatase (PP5)
PF3D7_1405500.1o1_7047	17	PF3D7_1405500	conserved Plasmodium protein, unknown function
PF3D7_1451500.1o1_7836	17	PF3D7_1451500	conserved Plasmodium protein, unknown function
PF3D7_1454800.1o1_6401	17	PF3D7_1454800	conserved Plasmodium protein, unknown function
PF3D7_1475800.1o2_6710	17	PF3D7_1475800	conserved Plasmodium protein, unknown function

## Sheet: Group3-Increased in Protected
unique_ID	count_protec_increased_HD	Gene.ID	Description
PF3D7_0304600_7131	4	PF3D7_0304600	circumsporozoite (CS) protein (CSP)
PF3D7_0907700.e1s1_8630	4	PF3D7_0907700	subunit of proteaseome activator complex, putative
PF3D7_1240900.iso1.exon3.amp1_1880	4	PF3D7_1240900	erythrocyte membrane protein 1, PfEMP1
PF3D7_1408700.e3s1_8075	4	PF3D7_1408700	conserved Plasmodium protein, unknown function
MAL8P1.143_14o15_5934	3	PF3D7_0803600	conserved Plasmodium protein, unknown function
PF3D7_0100600.iso1.exon1.amp1_2163	3	PF3D7_0100600	rifin
PF3D7_0101300.iso1.exon2.amp1_4146	3	PF3D7_0101300	Pfmc-2TM Maurer's cleft two transmembrane protein
PF3D7_0102200.e2s2_7188	3	PF3D7_0102200	ring-infected erythrocyte surface antigen (RESA)
PF3D7_0108300.s2_7111	3	PF3D7_0108300	conserved Plasmodium protein, unknown function
PF3D7_0108300.s3_7689	3	PF3D7_0108300	conserved Plasmodium protein, unknown function
PF3D7_0110000.1o1_8428	3	PF3D7_0110000	conserved Plasmodium protein, unknown function
PF3D7_0113800.2o4_7664	3	PF3D7_0113800	DBL containing protein, unknown function
PF3D7_0113900.2o2_5532	3	PF3D7_0113900	Plasmodium exported protein (hyp8), unknown function (GEXP10)
PF3D7_0200100.iso1.exon2.amp1_2746	3	PF3D7_0200100	erythrocyte membrane protein 1, PfEMP1
PF3D7_0200400.iso1.exon1.amp1_1275	3	PF3D7_0200400	stevor
PF3D7_0201000.iso1.exon1.amp1_3595	3	PF3D7_0201000	rifin
PF3D7_0201300.iso1.exon2.amp1_119	3	PF3D7_0201300	stevor
PF3D7_0206800_8292	3	PF3D7_0206800	merozoite surface protein 2 (MSP2)
PF3D7_0207000.1o2_6703	3	PF3D7_0207000	merozoite surface protein 4 (MSP4)
PF3D7_0207000.e1_7116	3	PF3D7_0207000	merozoite surface protein 4 (MSP4)
PF3D7_0207700.2o4_5642	3	PF3D7_0207700	serine repeat antigen 4 (SERA4)
PF3D7_0214300.iso1.exon1.amp1_2559	3	PF3D7_0214300	conserved Plasmodium protein, unknown function
PF3D7_0215700.e2s2_6920	3	PF3D7_0215700	DNA-directed RNA polymerase II second largest subunit, putative
PF3D7_0217400.2o2_6962	3	PF3D7_0217400	conserved Plasmodium protein, unknown function
PF3D7_0219600.e1s1_8817	3	PF3D7_0219600	replication factor C subunit 1, putative
PF3D7_0220000.e2s1_7105	3	PF3D7_0220000	liver stage antigen 3 (LSA3)
PF3D7_0220000.e2s2_7394	3	PF3D7_0220000	liver stage antigen 3 (LSA3)
PF3D7_0222100.iso1.exon1.amp1_3007	3	PF3D7_0222100	Pfmc-2TM Maurer's cleft two transmembrane protein
PF3D7_0223300.iso1.exon2.amp1_3611	3	PF3D7_0223300	erythrocyte membrane protein 1 (PfEMP1), truncated
PF3D7_0300200.iso1.exon1.amp1_3012	3	PF3D7_0300200	rifin
PF3D7_0301900.1o1_7888	3	PF3D7_0301900	conserved Plasmodium protein, unknown function
PF3D7_0302200.e1_5952	3	PF3D7_0302200	cytoadherence linked asexual protein 3.2 (CLAG3.2)
PF3D7_0303700.e1s1_6024	3	PF3D7_0303700	dihydrolipoamide acyltransferase, putative
PF3D7_0312400.2o7_8753	3	PF3D7_0312400	glycogen synthase kinase 3 (GSK3)
PF3D7_0315400.1o1_8147	3	PF3D7_0315400	conserved Plasmodium protein, unknown function
PF3D7_0316500.e1s1_5735	3	PF3D7_0316500	conserved Plasmodium protein, unknown function
PF3D7_0318600.iso1.exon1.amp1_836	3	PF3D7_0318600	cleavage and polyadenylation specifity factor, putative
PF3D7_0404600.s3_7434	3	PF3D7_0404600	conserved Plasmodium membrane protein, unknown function
PF3D7_0410300.1o2_7946	3	PF3D7_0410300	protein phosphatase, putative
PF3D7_0410900.1o1_6799	3	PF3D7_0410900	conserved Plasmodium protein, unknown function
PF3D7_0420700.e2s1_8336	3	PF3D7_0420700	erythrocyte membrane protein 1, PfEMP1 (VAR)
PF3D7_0421200.iso1.exon2.amp1_3312	3	PF3D7_0421200	rifin
PF3D7_0421300.iso1.exon1.amp1_2739	3	PF3D7_0421300	erythrocyte membrane protein 1, PfEMP1
PF3D7_0422100 (renamed)_7011	3	PF3D7_0422100	transmembrane emp24 domain-containing protein, putative
PF3D7_0425500.iso1.exon1.amp1_1565	3	PF3D7_0425500	stevor
PF3D7_0425800.iso1.exon2.amp1_4183	3	PF3D7_0425800	erythrocyte membrane protein 1, PfEMP1
PF3D7_0500100.iso1.exon2.amp1_1299	3	PF3D7_0500100	erythrocyte membrane protein 1, PfEMP1
PF3D7_0511400_8865	3	PF3D7_0511400	conserved Plasmodium protein, unknown function
PF3D7_0520400.e1s1_6896	3	PF3D7_0520400	conserved Plasmodium protein, unknown function
PF3D7_0524800.iso1.exon1.amp1_2188	3	PF3D7_0524800	ubiquitin fusion degradation protein UFD1, putative
PF3D7_0601200.iso1.exon2.amp1_695	3	PF3D7_0601200	Pfmc-2TM Maurer's cleft two transmembrane protein
PF3D7_0604000.iso1.exon1.amp3_760	3	PF3D7_0604000	conserved Plasmodium protein, unknown function
PF3D7_0606800.1o1_4981	3	PF3D7_0606800	probable protein, unknown function
PF3D7_0608100.iso1.exon1.amp2_2496	3	PF3D7_0608100	conserved Plasmodium protein, unknown function
PF3D7_0617400.s3 (renamed)_7396	3	PF3D7_0617400	erythrocyte membrane protein 1, PfEMP1 (VAR)
PF3D7_0625600.1o1_7626	3	PF3D7_0625600	poly(A) polymerase PAP, putative
PF3D7_0628100.iso1.exon1.amp9_1961	3	PF3D7_0628100	HECT-domain (ubiquitin-transferase), putative
PF3D7_0630600.2o2_8237	3	PF3D7_0630600	conserved Plasmodium protein, unknown function
PF3D7_0631100.iso1.exon2.amp1_1011	3	PF3D7_0631100	Plasmodium exported protein (PHISTb), unknown function
PF3D7_0631400.iso1.exon1.amp1_1562	3	PF3D7_0631400	Pfmc-2TM Maurer's cleft two transmembrane protein
PF3D7_0700400.iso1.exon3.amp1_4165	3	PF3D7_0700400	stevor
PF3D7_0701100.iso1.exon3.amp1_2151	3	PF3D7_0701100	rifin
PF3D7_0703500.e2s2_7503	3	PF3D7_0703500	erythrocyte membrane-associated antigen
PF3D7_0707400.iso1.exon1.amp1_1310	3	PF3D7_0707400	AAA family ATPase, putative
PF3D7_0711700.e2s1_5452	3	PF3D7_0711700	erythrocyte membrane protein 1, PfEMP1 (VAR)
PF3D7_0712000.iso1.exon1.amp1_145	3	PF3D7_0712000	erythrocyte membrane protein 1, PfEMP1
PF3D7_0712300.iso1.exon1.amp1_3615	3	PF3D7_0712300	erythrocyte membrane protein 1, PfEMP1
PF3D7_0712600.iso1.exon1.amp1_434	3	PF3D7_0712600	erythrocyte membrane protein 1, PfEMP1
PF3D7_0719000.1o1_5524	3	PF3D7_0719000	conserved Plasmodium protein, unknown function
PF3D7_0719700 (renamed)_9040	3	PF3D7_0719700	40S ribosomal protein S10, putative
PF3D7_0721700_4819	3	PF3D7_0721700	secreted ookinete protein, putative (PSOP1)
PF3D7_0722800.1o1_5891	3	PF3D7_0722800	conserved Plasmodium protein, unknown function
PF3D7_0726400.e6s2_4899	3	PF3D7_0726400	conserved Plasmodium membrane protein, unknown function
PF3D7_0732000.iso1.exon2.amp1_690	3	PF3D7_0732000	stevor
PF3D7_0732700.iso1.exon2.amp1_712	3	PF3D7_0732700	rifin
PF3D7_0800100.iso1.exon1.amp1_723	3	PF3D7_0800100	erythrocyte membrane protein 1, PfEMP1
PF3D7_0800200.e2s1_5745	3	PF3D7_0800200	erythrocyte membrane protein 1, PfEMP1 (VAR)
PF3D7_0800300.e2s1_8914	3	PF3D7_0800300	erythrocyte membrane protein 1, PfEMP1 (VAR)
PF3D7_0808600.e2s1_8343	3	PF3D7_0808600	erythrocyte membrane protein 1, PfEMP1 (VAR)
PF3D7_0809100.iso1.exon1.amp1_4184	3	PF3D7_0809100	erythrocyte membrane protein 1, PfEMP1
PF3D7_0828200.iso1.exon1.amp2_1624	3	PF3D7_0828200	leucine--tRNA ligase, putative
PF3D7_0830800.iso1.exon1.amp1_1373	3	PF3D7_0830800	surface-associated interspersed protein 8.2 (SURFIN 8.2)
PF3D7_0830800.iso1.exon2.amp1_1892	3	PF3D7_0830800	surface-associated interspersed protein 8.2 (SURFIN 8.2)
PF3D7_0832800.iso1.exon3.amp1_1854	3	PF3D7_0832800	rifin
PF3D7_0833500.iso1.exon3.amp1_3614	3	PF3D7_0833500	erythrocyte membrane protein 1, PfEMP1
PF3D7_0900100.iso1.exon2.amp1_151	3	PF3D7_0900100	erythrocyte membrane protein 1, PfEMP1
PF3D7_0900900.iso1.exon1.amp1_4454	3	PF3D7_0900900	stevor
PF3D7_0901800.2o2_8725	3	PF3D7_0901800	Plasmodium exported protein, unknown function
PF3D7_0903500.e1s1_7220	3	PF3D7_0903500	conserved Plasmodium protein, unknown function
PF3D7_0903500.e1s2_7214	3	PF3D7_0903500	conserved Plasmodium protein, unknown function
PF3D7_0905100.iso1.exon3.amp1_1647	3	PF3D7_0905100	nucleoporin NUP100/NSP100, putative
PF3D7_0905300.s5_9157	3	PF3D7_0905300	dynein heavy chain, putative
PF3D7_0909500_5686	3	PF3D7_0909500	subpellicular microtubule protein 1, putative (SPM1)
PF3D7_0912800.1o1_8778	3	PF3D7_0912800	tRNA 1-methyladenosine methyltransferase subunit, putative
PF3D7_0915400.e1s1_6348	3	PF3D7_0915400	6-phosphofructokinase (PFK9)
PF3D7_0923800.1.e1s1_7487	3	PF3D7_0923800.1	thioredoxin reductase (TRXR)
PF3D7_0923800.iso2.exon1.amp1_446	3	PF3D7_0923800	thioredoxin reductase
PF3D7_0935800.e9_9148	3	PF3D7_0935800	cytoadherence linked asexual protein 9 (CLAG9)
PF3D7_0936300.2o2_8152	3	PF3D7_0936300	ring-exported protein 3 (REX3)
PF3D7_0937700.iso1.exon2.amp1_713	3	PF3D7_0937700	rifin
PF3D7_1000100.iso1.exon2.amp1_3908	3	PF3D7_1000100	erythrocyte membrane protein 1, PfEMP1
PF3D7_1000300.iso1.exon1.amp1_3601	3	PF3D7_1000300	rifin
PF3D7_1000500.iso1.exon3.amp1_4465	3	PF3D7_1000500	rifin
PF3D7_1001300.2o2_6130	3	PF3D7_1001300	Plasmodium exported protein (PHISTa), unknown function
PF3D7_1007700.e1s2_8091	3	PF3D7_1007700	transcription factor with AP2 domain(s) (ApiAP2)
PF3D7_1009000.1o1_8727	3	PF3D7_1009000	diphthine synthase
PF3D7_1014100.s1_5371	3	PF3D7_1014100	conserved Plasmodium protein, unknown function
PF3D7_1021800.iso1.exon2.amp1_3703	3	PF3D7_1021800	conserved Plasmodium protein, unknown function
PF3D7_1023100.e1s6_5941	3	PF3D7_1023100	dynein heavy chain, putative
PF3D7_1030200.1o1_4717	3	PF3D7_1030200	conserved Plasmodium protein, unknown function
PF3D7_1035100.1o1_8208	3	PF3D7_1035100	probable protein, unknown function
PF3D7_1035800.1o1_5041	3	PF3D7_1035800	probable protein, unknown function
PF3D7_1035900.1o1_5890	3	PF3D7_1035900	probable protein, unknown function
PF3D7_1036900.e1s2_5948	3	PF3D7_1036900	conserved Plasmodium protein, unknown function
PF3D7_1037000.iso1.exon3.amp1_4275	3	PF3D7_1037000	DNA polymerase zeta catalytic subunit, putative
PF3D7_1039700.iso1.exon1.amp1_1851	3	PF3D7_1039700	Pfmc-2TM Maurer's cleft two transmembrane protein
PF3D7_1040200.iso1.exon2.amp1_408	3	PF3D7_1040200	stevor
PF3D7_1040900.iso1.exon2.amp1_2143	3	PF3D7_1040900	rifin
PF3D7_1041300.iso1.exon1.amp1_1293	3	PF3D7_1041300	erythrocyte membrane protein 1, PfEMP1
PF3D7_1101200.iso1.exon1.amp1_3319	3	PF3D7_1101200	rifin
PF3D7_1101700.iso1.exon2.amp1_2140	3	PF3D7_1101700	Pfmc-2TM Maurer's cleft two transmembrane protein
PF3D7_1103800.e1s1_7393	3	PF3D7_1103800	CCR4-NOT transcription complex subunit 1, putative (NOT1)
PF3D7_1113700.e1s1_8346	3	PF3D7_1113700	glyoxalase I (GloI)
PF3D7_1118200.e1s1_7968	3	PF3D7_1118200	heat shock protein 90, putative
PF3D7_1121800.s1_7974	3	PF3D7_1121800	petidase, M16 family
PF3D7_1122900.e2s5_7132	3	PF3D7_1122900	dynein heavy chain, putative
PF3D7_1126400.2o3_5535	3	PF3D7_1126400	large ribosomal subunit processing factor, putative
PF3D7_1128100.2o3_7845	3	PF3D7_1128100	cochaperone prefoldin complex subunit, putative
PF3D7_1130400_8004	3	PF3D7_1130400	26S proteasome regulatory subunit 6a, putative
PF3D7_1132300.1o1_5547	3	PF3D7_1132300	nucleic acid binding protein, putative
PF3D7_1133400_6235	3	PF3D7_1133400	apical membrane antigen 1 (AMA1)
PF3D7_1136200.5o5_9080	3	PF3D7_1136200	conserved Plasmodium protein, unknown function
PF3D7_1137900.2o2_4737	3	PF3D7_1137900	conserved Plasmodium protein, unknown function
PF3D7_1139300.e2s1_8655	3	PF3D7_1139300	transcription factor with AP2 domain(s) (ApiAP2)
PF3D7_1146000.1o1_8205	3	PF3D7_1146000	nucleolar preribosomal assembly protein, putative
PF3D7_1150400.iso1.exon2.amp1_714	3	PF3D7_1150400	erythrocyte membrane protein 1, PfEMP1
PF3D7_1200500.iso1.exon1.amp1_2436	3	PF3D7_1200500	rifin
PF3D7_1201200.2o2_4660	3	PF3D7_1201200	Plasmodium exported protein, unknown function
PF3D7_1219000.iso1.exon1.amp1_seg1_4603	3	PF3D7_1219000	formin 2
PF3D7_1219600.iso1.exon3.amp2_2830	3	PF3D7_1219600	aminophospholipid-transporting P-ATPase
PF3D7_1234800.e1s2_8941	3	PF3D7_1234800	Splicing factor 3B subunit 3, putative (SF3B3)
PF3D7_1236200.iso1.exon1.amp2_4226	3	PF3D7_1236200	conserved Plasmodium protein, unknown function
PF3D7_1239800.s5_6570	3	PF3D7_1239800	conserved Plasmodium protein, unknown function
PF3D7_1240400.iso1.exon2.amp1_1013	3	PF3D7_1240400	erythrocyte membrane protein 1, PfEMP1
PF3D7_1248000.1o1_9006	3	PF3D7_1248000	conserved Plasmodium protein, unknown function
PF3D7_1250800.e2s2_7441	3	PF3D7_1250800	DNA repair protein rhp16, putative
PF3D7_1252200.1o1_7010	3	PF3D7_1252200	chitinase (CHT1)
PF3D7_1255200.iso1.exon1.amp1_3324	3	PF3D7_1255200	erythrocyte membrane protein 1, PfEMP1
PF3D7_1300300.s2 (renamed)_7313	3	PF3D7_1300300	erythrocyte membrane protein 1, PfEMP1 (VAR)
PF3D7_1300600.iso1.exon1.amp1_4179	3	PF3D7_1300600	rifin
PF3D7_1300900.iso1.exon1.amp1_4455	3	PF3D7_1300900	stevor
PF3D7_1305700.1o1_6964	3	PF3D7_1305700	conserved Plasmodium protein, unknown function
PF3D7_1321800.1o4_7280	3	PF3D7_1321800	SFT2-like protein, putative
PF3D7_1325500.iso1.exon1.amp1_1897	3	PF3D7_1325500	conserved Plasmodium protein, unknown function
PF3D7_1325900.e1s1_8003	3	PF3D7_1325900	conserved Plasmodium protein, unknown function
PF3D7_1326200.iso1.exon3.amp1_3867	3	PF3D7_1326200	conserved Plasmodium protein, unknown function
PF3D7_1328200.iso1.exon1.amp2_seg1_277	3	PF3D7_1328200	conserved Plasmodium protein, unknown function
PF3D7_1328300.1o3_6129	3	PF3D7_1328300	conserved Plasmodium protein, unknown function
PF3D7_1329200.iso1.exon1.amp1_2427	3	PF3D7_1329200	conserved Plasmodium protein, unknown function
PF3D7_1334200.e1s1_6893	3	PF3D7_1334200	chaperone binding protein, putative
PF3D7_1334400.1o1_8728	3	PF3D7_1334400	MSP7-like protein (MSRP4)
PF3D7_1334800.1o1_8159	3	PF3D7_1334800	MSP7-like protein (MSRP2)
PF3D7_1352700.iso1.exon1.amp3_2204	3	PF3D7_1352700	P-loop containing nucleoside triphosphate hydrolase, putative
PF3D7_1353300.iso1.exon1.amp2_237	3	PF3D7_1353300	conserved Plasmodium protein, unknown function
PF3D7_1353300.iso1.exon1.amp3_4512	3	PF3D7_1353300	conserved Plasmodium protein, unknown function
PF3D7_1372800.iso1.exon2.amp1_3009	3	PF3D7_1372800	stevor
PF3D7_1400700.iso1.exon1.amp1_2135	3	PF3D7_1400700	stevor
PF3D7_1405200.iso1.exon1.amp1_3269	3	PF3D7_1405200	sybindin-like protein, putative
PF3D7_1406500.iso1.exon2.amp1_1090	3	PF3D7_1406500	conserved Plasmodium protein, unknown function
PF3D7_1407900.e1s1_6608	3	PF3D7_1407900	plasmepsin I (PMI)
PF3D7_1410100.1o7_5851	3	PF3D7_1410100	alpha/beta hydrolase, putative
PF3D7_1410400.e1s1_7222	3	PF3D7_1410400	rhoptry-associated protein 1 (RAP1)
PF3D7_1420000.3o3_5002	3	PF3D7_1420000	splicing factor 3B subunit 4, putative (SF3B4)
PF3D7_1444100.e7s1_6923	3	PF3D7_1444100	conserved Plasmodium protein, unknown function
PF3D7_1446700.1o2_9003	3	PF3D7_1446700	conserved Plasmodium protein, unknown function
PF3D7_1446700.1o8_8122	3	PF3D7_1446700	conserved Plasmodium protein, unknown function
PF3D7_1473100.e2s1_8340	3	PF3D7_1473100	GTPase activator, putative
PF3D7_1473700.iso1.exon1.amp1_251	3	PF3D7_1473700	conserved Plasmodium protein, unknown function
PF3D7_1479400.iso1.exon2.amp1_140	3	PF3D7_1479400	rifin
PF3D7_1479800.iso1.exon2.amp1_4468	3	PF3D7_1479800	rifin
PF3D7_0100100.iso1.exon2.amp1_1871	2	PF3D7_0100100	erythrocyte membrane protein 1, PfEMP1
PF3D7_0100300.iso1.exon1.amp1_1010	2	PF3D7_0100300	var-like erythrocyte membrane protein 1
PF3D7_0101600.iso1.exon1.amp1_3887	2	PF3D7_0101600	rifin
PF3D7_0101800.iso1.exon1.amp1_2719	2	PF3D7_0101800	stevor
PF3D7_0101900.iso1.exon1.amp1_123	2	PF3D7_0101900	rifin
PF3D7_0102200.e2s1_7477	2	PF3D7_0102200	ring-infected erythrocyte surface antigen (RESA)
PF3D7_0104000.3o3_6106	2	PF3D7_0104000	thrombospondin-related sporozoite protein (TRSP)
PF3D7_0104100.2o2_5342	2	PF3D7_0104100	conserved Plasmodium membrane protein, unknown function
PF3D7_0108400.iso1.exon7.amp1_45	2	PF3D7_0108400	mitochondrial carrier protein, putative
PF3D7_0111000.e1s2_6049	2	PF3D7_0111000	kinesin, putative
PF3D7_0111500.e4s1_8619	2	PF3D7_0111500	UMP-CMP kinase, putative
PF3D7_0112000.3o4_5862	2	PF3D7_0112000	TatD-like deoxyribonuclease, putative
PF3D7_0112100.1o1_6684	2	PF3D7_0112100	conserved Plasmodium protein, unknown function
PF3D7_0112200.iso1.exon1.amp2_183	2	PF3D7_0112200	multidrug resistance-associated protein 1
PF3D7_0113100.iso1.exon2.amp2_3349	2	PF3D7_0113100	surface-associated interspersed protein 1.1 (SURFIN 1.1)
PF3D7_0113400.2o2_8752	2	PF3D7_0113400	Plasmodium exported protein, unknown function
PF3D7_0114100.iso1.exon1.amp1_2718	2	PF3D7_0114100	Pfmc-2TM Maurer's cleft two transmembrane protein
PF3D7_0115200.iso1.exon2.amp1_719	2	PF3D7_0115200	rifin
PF3D7_0115300.iso1.exon2.amp1_1279	2	PF3D7_0115300	rifin
PF3D7_0115400.iso1.exon2.amp1_2714	2	PF3D7_0115400	stevor
PF3D7_0115700.iso1.exon1.amp1_1583	2	PF3D7_0115700	erythrocyte membrane protein 1, PfEMP1
PF3D7_0200100 (renamed)_4770	2	PF3D7_0200100	erythrocyte membrane protein 1, PfEMP1 (VAR)
PF3D7_0200500.iso1.exon1.amp1_3303	2	PF3D7_0200500	rifin
PF3D7_0201200.iso1.exon2.amp1_3603	2	PF3D7_0201200	rifin
PF3D7_0201800.iso1.exon1.amp1_4451	2	PF3D7_0201800	RESA-like protein with PHIST and DnaJ domains
PF3D7_0203000.iso1.exon1.amp2_1055	2	PF3D7_0203000	conserved Plasmodium protein, unknown function
PF3D7_0204800.iso1.exon1.amp1_3895	2	PF3D7_0204800	3'-5' exonuclease, putative
PF3D7_0206000.s2_8261	2	PF3D7_0206000	DNA repair endonuclease, putative
PF3D7_0207000.2o2_6414	2	PF3D7_0207000	merozoite surface protein 4 (MSP4)
PF3D7_0207500.e1s1_8609	2	PF3D7_0207500	serine repeat antigen 6 (SERA6)
PF3D7_0207500.e3s1_8088	2	PF3D7_0207500	serine repeat antigen 6 (SERA6)
PF3D7_0209800.e2_6830	2	PF3D7_0209800	ATP-dependent RNA helicase UAP56 (UAP56)
PF3D7_0210200.iso1.exon2.amp2_seg1_2597	2	PF3D7_0210200	conserved Plasmodium protein, unknown function
PF3D7_0210300.e2_9137	2	PF3D7_0210300	monocarboxylate transporter, putative
PF3D7_0211100.iso1.exon1.amp2_1349	2	PF3D7_0211100	conserved Plasmodium protein, unknown function
PF3D7_0211900.iso1.exon1.amp1_2450	2	PF3D7_0211900	conserved Plasmodium protein, unknown function
PF3D7_0214100.e1s1_6246	2	PF3D7_0214100	protein transport protein sec31 (SEC31)
PF3D7_0216700.iso2.exon6.amp1_679	2	PF3D7_0216700	conserved Plasmodium protein, unknown function
PF3D7_0217700.iso1.exon1.amp1_3848	2	PF3D7_0217700	E2F-associated phosphoprotein, putative
PF3D7_0217900.e1s1_7766	2	PF3D7_0217900	conserved Plasmodium protein, unknown function
PF3D7_0219700.2o2_6131	2	PF3D7_0219700	Plasmodium exported protein (PHISTc), unknown function (GEXP20)
PF3D7_0219900.2o2_6693	2	PF3D7_0219900	Plasmodium exported protein, unknown function
PF3D7_0220100.e2s1_7661	2	PF3D7_0220100	DnaJ protein, putative
PF3D7_0220600.2o2_6976	2	PF3D7_0220600	Plasmodium exported protein (hyp9), unknown function
PF3D7_0222700.iso1.exon2.amp1_1289	2	PF3D7_0222700	rifin
PF3D7_0222900.1o1_4649	2	PF3D7_0222900	erythrocyte membrane protein 1 (PfEMP1), exon2, pseudogene
PF3D7_0223300 (renamed)_6619	2	PF3D7_0223300	erythrocyte membrane protein 1 (PfEMP1), truncated
PF3D7_0223500.iso1.exon1.amp1_3027	2	PF3D7_0223500	erythrocyte membrane protein 1, PfEMP1
PF3D7_0300100.iso1.exon2.amp1_138	2	PF3D7_0300100	erythrocyte membrane protein 1, PfEMP1
PF3D7_0300400.iso1.exon1.amp1_401	2	PF3D7_0300400	stevor
PF3D7_0302000.iso1.exon2.amp1_158	2	PF3D7_0302000	golgi organization and biogenesis factor, putative
PF3D7_0302200.1o9_6523	2	PF3D7_0302200	cytoadherence linked asexual protein 3.2 (CLAG3.2)
PF3D7_0302500.e1s1_7185	2	PF3D7_0302500	cytoadherence linked asexual protein 3.1 (CLAG3.1)
PF3D7_0302500.e9s1_6314	2	PF3D7_0302500	cytoadherence linked asexual protein 3.1 (CLAG3.1)
PF3D7_0304200.e1s1_8348	2	PF3D7_0304200	EH (Eps15 homology) protein (PAST1)
PF3D7_0307500.iso1.exon4.amp1_417	2	PF3D7_0307500	conserved Plasmodium protein, unknown function
PF3D7_0309000.iso1.exon1.amp1_144	2	PF3D7_0309000	dual specificity phosphatase
PF3D7_0310200.e1s3_7089	2	PF3D7_0310200	phd finger protein, putative
PF3D7_0310300.e1s2_6327	2	PF3D7_0310300	phosphoglycerate mutase, putative
PF3D7_0311400.iso1.exon2.amp1_782	2	PF3D7_0311400	protein kinase, putative
PF3D7_0313400.iso1.exon1.amp1_445	2	PF3D7_0313400	conserved Plasmodium protein, unknown function
PF3D7_0313700.iso1.exon2.amp1_2360	2	PF3D7_0313700	conserved Plasmodium protein, unknown function
PF3D7_0317300.s3_7150	2	PF3D7_0317300	conserved Plasmodium protein, unknown function
PF3D7_0318500.iso1.exon1.amp5_162	2	PF3D7_0318500	conserved Plasmodium protein, unknown function
PF3D7_0324100.2o2_5248	2	PF3D7_0324100	Pfmc-2TM Maurer's cleft two transmembrane protein (MC-2TM)
PF3D7_0324600.iso1.exon2.amp1_3003	2	PF3D7_0324600	stevor (3D7-stevorT3-2)
PF3D7_0324900.iso1.exon1.amp1_2456	2	PF3D7_0324900	erythrocyte membrane protein 1, PfEMP1
PF3D7_0400100.iso1.exon2.amp1_4192	2	PF3D7_0400100	erythrocyte membrane protein 1, PfEMP1
PF3D7_0400200.iso1.exon1.amp1_1876	2	PF3D7_0400200	erythrocyte membrane protein 1 (PfEMP1), exon2
PF3D7_0400400.iso1.exon1.amp1_1294	2	PF3D7_0400400	erythrocyte membrane protein 1, PfEMP1
PF3D7_0400800.iso1.exon1.amp1_3008	2	PF3D7_0400800	stevor
PF3D7_0401000.iso1.exon1.amp1_2432	2	PF3D7_0401000	rifin
PF3D7_0401900.1o1_7666	2	PF3D7_0401900	acyl-CoA synthetase (ACS6)
PF3D7_0402600.iso1.exon1.amp1_4449	2	PF3D7_0402600	stevor
PF3D7_0406200_8002	2	PF3D7_0406200	sexual stage-specific protein precursor (Pfs16)
PF3D7_0412700.iso1.exon1.amp1_2752	2	PF3D7_0412700	erythrocyte membrane protein 1, PfEMP1
PF3D7_0412900.iso1.exon1.amp1_435	2	PF3D7_0412900	erythrocyte membrane protein 1, PfEMP1
PF3D7_0412900.iso1.exon2.amp2_3385	2	PF3D7_0412900	erythrocyte membrane protein 1, PfEMP1
PF3D7_0413200.iso1.exon1.amp1_2147	2	PF3D7_0413200	rifin
PF3D7_0416400.iso1.exon2.amp1_1080	2	PF3D7_0416400	histone acetyltransferase, putative
PF3D7_0417100.1o4_5878	2	PF3D7_0417100	RNA binding protein Puf2 (PUF2)
PF3D7_0417400.iso1.exon1.amp6_seg1_1730	2	PF3D7_0417400	conserved Plasmodium protein, unknown function
PF3D7_0419300.iso1.exon1.amp1_2162	2	PF3D7_0419300	conserved Plasmodium protein, unknown function
PF3D7_0420300.iso1.exon1.amp4_seg1_3445	2	PF3D7_0420300	transcription factor with AP2 domain(s)
PF3D7_0422500.e1s3_5652	2	PF3D7_0422500	pre-mRNA-splicing helicase BRR2, putative (BRR2)
PF3D7_0424800.2o2_6416	2	PF3D7_0424800	Plasmodium exported protein (PHISTb), unknown function
PF3D7_0425100.2o2_8127	2	PF3D7_0425100	Plasmodium exported protein (hyp6), unknown function
PF3D7_0425200.2o2_5531	2	PF3D7_0425200	Plasmodium exported protein (hyp15), unknown function
PF3D7_0425800.iso1.exon1.amp1_3955	2	PF3D7_0425800	erythrocyte membrane protein 1, PfEMP1
PF3D7_0425900.iso1.exon2.amp1_4457	2	PF3D7_0425900	rifin
PF3D7_0500900.iso1.exon2.amp1_442	2	PF3D7_0500900	serine/threonine protein kinase, FIKK family
PF3D7_0501000.e2s1_5152	2	PF3D7_0501000	Plasmodium exported protein, unknown function
PF3D7_0501200.e2_7703	2	PF3D7_0501200	parasite-infected erythrocyte surface protein (PIESP2)
PF3D7_0501500.e1s1_8931	2	PF3D7_0501500	rhoptry-associated protein 3 (RAP3)
PF3D7_0501800.e1s1_4880	2	PF3D7_0501800	chromosome assembly factor 1 (CAF1)
PF3D7_0502400.1o1_5886	2	PF3D7_0502400	ring-stage membrane protein 1,merozoite surface protein 8 (MSP8)
PF3D7_0502700.iso1.exon2.amp1_3857	2	PF3D7_0502700	conserved Plasmodium protein, unknown function
PF3D7_0505100.iso1.exon1.amp2_3685	2	PF3D7_0505100	conserved Plasmodium protein, unknown function
PF3D7_0506300.iso1.exon1.amp1_3900	2	PF3D7_0506300	conserved Plasmodium protein, unknown function
PF3D7_0509900.iso1.exon1.amp1_3597	2	PF3D7_0509900	conserved Plasmodium protein, unknown function
PF3D7_0510400.1o1_8464	2	PF3D7_0510400	conserved Plasmodium protein, unknown function
PF3D7_0511400.1o1_4698	2	PF3D7_0511400	conserved Plasmodium protein, unknown function
PF3D7_0511500.s4_7427	2	PF3D7_0511500	RNA pseudouridylate synthase, putative
PF3D7_0513200.e2s3_5488	2	PF3D7_0513200	conserved Plasmodium protein, unknown function
PF3D7_0517600.1o1_7287	2	PF3D7_0517600	f-actin capping protein beta subunit, putative (CP)
PF3D7_0517900.2o2_7334	2	PF3D7_0517900	zinc finger protein, putative
PF3D7_0518800.iso1.exon7.amp1_2109	2	PF3D7_0518800	secreted ookinete protein, putative
PF3D7_0521600.iso1.exon1.amp1_1810	2	PF3D7_0521600	conserved Plasmodium protein, unknown function
PF3D7_0522400.e4s3_7140	2	PF3D7_0522400	conserved Plasmodium protein, unknown function
PF3D7_0525800.e1s1_6607	2	PF3D7_0525800	membrane skeletal protein IMC1-related
PF3D7_0526600.iso1.exon1.amp4_3706	2	PF3D7_0526600	conserved Plasmodium protein, unknown function
PF3D7_0527200.e2s1_8350	2	PF3D7_0527200	ubiquitin carboxyl-terminal hydrolase, putative
PF3D7_0530100.2o2_9005	2	PF3D7_0530100	SNARE protein, putative (SYN6)
PF3D7_0532100_6557	2	PF3D7_0532100	early transcribed membrane protein 5 (ETRAMP5)
PF3D7_0532400.e1s1_5131	2	PF3D7_0532400	Plasmodium exported protein (PHISTb), unknown function
PF3D7_0600400.iso1.exon1.amp1_3033	2	PF3D7_0600400	erythrocyte membrane protein 1 (PfEMP1)-like protein
PF3D7_0600700.iso1.exon1.amp1_4469	2	PF3D7_0600700	rifin
PF3D7_0601500.iso1.exon1.amp1_4480	2	PF3D7_0601500	Plasmodium exported protein (PHISTb), unknown function
PF3D7_0602100.iso1.exon1.amp2_1960	2	PF3D7_0602100	ATP-dependent RNA helicase, putative
PF3D7_0602700.iso1.exon1.amp1_1591	2	PF3D7_0602700	conserved Plasmodium protein, unknown function
PF3D7_0604100.iso1.exon1.amp2_3651	2	PF3D7_0604100	transcription factor with AP2 domain(s)
PF3D7_0604500.iso1.exon1.amp3_3986	2	PF3D7_0604500	conserved Plasmodium protein, unknown function
PF3D7_0606100.iso1.exon4.amp1_4473	2	PF3D7_0606100	RNA binding protein, putative
PF3D7_0611800.iso1.exon5.amp3_508	2	PF3D7_0611800	conserved Plasmodium protein, unknown function
PF3D7_0614400.1o1_8430	2	PF3D7_0614400	conserved Plasmodium protein, unknown function
PF3D7_0615100.1o1_7590	2	PF3D7_0615100	enoyl-acyl carrier reductase (ENR)
PF3D7_0616800.iso1.exon1.amp1_2475	2	PF3D7_0616800	malate:quinone oxidoreductase, putative
PF3D7_0617600.iso1.exon1.amp1_3292	2	PF3D7_0617600	stevor
PF3D7_0618900.iso2.exon2.amp1_2167	2	PF3D7_0618900	N-acetylglucosamine transferase (GPI1)
PF3D7_0620400.1o1_7613	2	PF3D7_0620400	merozoite surface protein 10 (MSP10)
PF3D7_0621400.1o1_8784	2	PF3D7_0621400	Pf77 protein (ALV7)
PF3D7_0622000.iso1.exon3.amp1_2970	2	PF3D7_0622000	conserved Plasmodium protein, unknown function
PF3D7_0622800.s1 (renamed)_4799	2	PF3D7_0622800	leucyl tRNA synthase
PF3D7_0622800.s2 (renamed)_5666	2	PF3D7_0622800	leucyl tRNA synthase
PF3D7_0623700.iso1.exon1.amp2_4528	2	PF3D7_0623700	ATP dependent DEAD-box helicase, putative
PF3D7_0625400.1o1_5288	2	PF3D7_0625400	conserved Plasmodium protein, unknown function
PF3D7_0628100.iso1.exon1.amp7_1383	2	PF3D7_0628100	HECT-domain (ubiquitin-transferase), putative
PF3D7_0631800.iso1.exon2.amp1_3318	2	PF3D7_0631800	rifin
PF3D7_0632200.iso1.exon1.amp1_3015	2	PF3D7_0632200	rifin
PF3D7_0632300.iso1.exon2.amp1_423	2	PF3D7_0632300	rifin
PF3D7_0632500.iso1.exon1.amp1_3326	2	PF3D7_0632500	erythrocyte membrane protein 1, PfEMP1
PF3D7_0632700.iso1.exon2.amp1_2437	2	PF3D7_0632700	rifin
PF3D7_0700100.iso1.exon3.amp1_1301	2	PF3D7_0700100	erythrocyte membrane protein 1, PfEMP1
PF3D7_0701000.1o1_5806	2	PF3D7_0701000	erythrocyte membrane protein 1 (PfEMP1), pseudogene
PF3D7_0701600.iso1.exon2.amp1_4435	2	PF3D7_0701600	Pfmc-2TM Maurer's cleft two transmembrane protein
PF3D7_0701900.e2s1_9111	2	PF3D7_0701900	Plasmodium exported protein, unknown function
PF3D7_0702300.2o2_7331	2	PF3D7_0702300	sporozoite threonine and asparagine-rich protein (STARP)
PF3D7_0703100.1o1_5246	2	PF3D7_0703100	conserved Plasmodium protein, unknown function
PF3D7_0703700.e1s1_8629	2	PF3D7_0703700	conserved Plasmodium protein, unknown function
PF3D7_0704200.iso1.exon1.amp2_769	2	PF3D7_0704200	tRNA m5C-methyltransferase, putative
PF3D7_0704800.iso1.exon1.amp1_3430	2	PF3D7_0704800	conserved Plasmodium protein, unknown function
PF3D7_0704800.iso1.exon1.amp2_1629	2	PF3D7_0704800	conserved Plasmodium protein, unknown function
PF3D7_0705500.iso1.exon2.amp2_3383	2	PF3D7_0705500	inositol-phosphate phosphatase, putative
PF3D7_0705600.iso1.exon1.amp2_4245	2	PF3D7_0705600	RNA helicase, putative
PF3D7_0706700.1o1_8234	2	PF3D7_0706700	DNA mismatch repair protein, putative (MSH2-2)
PF3D7_0709300.iso1.exon1.amp3_2493	2	PF3D7_0709300	Cg2 protein
PF3D7_0709400.iso1.exon2.amp1_2171	2	PF3D7_0709400	Cg7 protein
PF3D7_0709900.e2_7429	2	PF3D7_0709900	conserved Plasmodium membrane protein, unknown function
PF3D7_0711100.iso1.exon1.amp1_1552	2	PF3D7_0711100	conserved Plasmodium membrane protein, unknown function
PF3D7_0712400.iso1.exon1.amp1_1004	2	PF3D7_0712400	erythrocyte membrane protein 1, PfEMP1
PF3D7_0712800.iso1.exon1.amp1_3904	2	PF3D7_0712800	erythrocyte membrane protein 1, PfEMP1
PF3D7_0712900.iso1.exon1.amp1_3316	2	PF3D7_0712900	erythrocyte membrane protein 1, PfEMP1
PF3D7_0713600.iso1.exon1.amp1_3623	2	PF3D7_0713600	mitochondrial ribosomal protein S5 precursor, putative
PF3D7_0713900.e1s3_8249	2	PF3D7_0713900	conserved Plasmodium protein, unknown function
PF3D7_0713900.e1s4_5937	2	PF3D7_0713900	conserved Plasmodium protein, unknown function
PF3D7_0714200.iso1.exon1.amp2_463	2	PF3D7_0714200	conserved Plasmodium protein, unknown function
PF3D7_0716300.e1s1_8921	2	PF3D7_0716300	conserved Plasmodium protein, unknown function
PF3D7_0718000.e4s1_4866	2	PF3D7_0718000	dynein heavy chain, putative
PF3D7_0718300.e5s1_8050	2	PF3D7_0718300	cysteine repeat modular protein 2 (CRMP2)
PF3D7_0718600.iso1.exon6.amp1_3617	2	PF3D7_0718600	conserved Plasmodium protein, unknown function
PF3D7_0718600.iso1.exon8.amp1_4159	2	PF3D7_0718600	conserved Plasmodium protein, unknown function
PF3D7_0719100.iso1.exon2.amp1_947	2	PF3D7_0719100	conserved Plasmodium protein, unknown function
PF3D7_0719500.1o2_8186	2	PF3D7_0719500	conserved membrane protein, unknown function
PF3D7_0723900.e1s2_5176	2	PF3D7_0723900	conserved Plasmodium protein, unknown function
PF3D7_0724300.iso1.exon1.amp1_112	2	PF3D7_0724300	3-demethylubiquinone-9 3-methyltransferase, putative
PF3D7_0728600.iso1.exon3.amp1_2396	2	PF3D7_0728600	zinc finger, C3HC4 type, putative
PF3D7_0728800.iso1.exon1.amp1_4481	2	PF3D7_0728800	conserved Plasmodium protein, unknown function
PF3D7_0730900.e2s1_8659	2	PF3D7_0730900	Plasmodium exported protein, unknown function
PF3D7_0731100.2o2_6789	2	PF3D7_0731100	Plasmodium exported protein (PHISTc), unknown function (GEXP11)
PF3D7_0731200.2o2_8439	2	PF3D7_0731200	Plasmodium exported protein, unknown function
PF3D7_0732200.iso1.exon2.amp1_1297	2	PF3D7_0732200	rifin
PF3D7_0733000.iso1.exon1.amp1_3621	2	PF3D7_0733000	erythrocyte membrane protein 1, PfEMP1
PF3D7_0802000.e1s1_5197	2	PF3D7_0802000	glutamate dehydrogenase, putative (GDHc)
PF3D7_0802300.iso1.exon1.amp1_1413	2	PF3D7_0802300	rRNA processing WD-repeat protein, putative
PF3D7_0803400.iso1.exon1.amp1_4581	2	PF3D7_0803400	DNA repair protein rad54, putative
PF3D7_0803400.iso1.exon1.amp2_3948	2	PF3D7_0803400	DNA repair protein rad54, putative
PF3D7_0804000.iso1.exon1.amp1_4456	2	PF3D7_0804000	cactin homolog, putative
PF3D7_0806800.e1s1_8932	2	PF3D7_0806800	vacuolar proton translocating ATPase subunit A, putative
PF3D7_0807100.iso1.exon1.amp2_3363	2	PF3D7_0807100	RNA helicase, putative
PF3D7_0807700.5o5_5617	2	PF3D7_0807700	serine protease, putative
PF3D7_0808100.iso1.exon3.amp1_3963	2	PF3D7_0808100	conserved Plasmodium protein, unknown function
PF3D7_0808200.e1s1_9217	2	PF3D7_0808200	plasmepsin X
PF3D7_0808700.iso1.exon1.amp1_3035	2	PF3D7_0808700	erythrocyte membrane protein 1, PfEMP1
PF3D7_0808800.iso1.exon1.amp1_3594	2	PF3D7_0808800	rifin
PF3D7_0809200.e1s2_6342	2	PF3D7_0809200	asparagine-rich antigen Pfa55-14 (pfa55-14)
PF3D7_0810800.e2s1_9231	2	PF3D7_0810800	dihydropteroate synthetase (DHPS)
PF3D7_0811600.e2s2_7207	2	PF3D7_0811600	conserved Plasmodium protein, unknown function
PF3D7_0812700.1o1_7561	2	PF3D7_0812700	RNA-binding protein (U1 snRNP-like), putative
PF3D7_0815500.3o5_7032	2	PF3D7_0815500	conserved Plasmodium protein, unknown function
PF3D7_0816200.1o1_6682	2	PF3D7_0816200	vacuolar protein-sorting protein VPS2, putative
PF3D7_0817300.e1s3_7500	2	PF3D7_0817300	asparagine-rich antigen
PF3D7_0818900_4784	2	PF3D7_0818900	heat shock protein 70 (Hsp70)
PF3D7_0821500.1o1_8442	2	PF3D7_0821500	ribosome biogenesis protein nep1 homologue, putative
PF3D7_0823300 (renamed, has duplicates)_6432	2	PF3D7_0823300	histone acetyltransferase GCN5 (GCN5)
PF3D7_0823300.e1s2_7199	2	PF3D7_0823300	histone acetyltransferase GCN5 (GCN5)
PF3D7_0823500.1o1_5877	2	PF3D7_0823500	membrane skeletal protein IMC1-related
PF3D7_0824200.iso1.exon2.amp2_seg1_3463	2	PF3D7_0824200	conserved Plasmodium protein, unknown function
PF3D7_0825800.iso1.exon1.amp1_1307	2	PF3D7_0825800	conserved Plasmodium protein, unknown function
PF3D7_0826300.1o1_6730	2	PF3D7_0826300	SPRY domain, putative
PF3D7_0826500.e1s1_5469	2	PF3D7_0826500	ubiquitination-mediated degradation component, putative
PF3D7_0827600.2o2_6223	2	PF3D7_0827600	conserved Plasmodium protein, unknown function
PF3D7_0827900.e2_7119	2	PF3D7_0827900	protein disulfide isomerase (PDI8)
PF3D7_0830800.iso1.exon1.amp2_4505	2	PF3D7_0830800	surface-associated interspersed protein 8.2 (SURFIN 8.2)
PF3D7_0831300.2o2_7356	2	PF3D7_0831300	Plasmodium exported protein, unknown function (GEXP13)
PF3D7_0831700.2o2_5026	2	PF3D7_0831700	heat shock protein 70, putative (HSP70-x)
PF3D7_0831800.2o2_5849	2	PF3D7_0831800	histidine-rich protein II (HRPII)
PF3D7_0832900.iso1.exon3.amp1_986	2	PF3D7_0832900	stevor
PF3D7_0833300.iso1.exon1.amp1_1870	2	PF3D7_0833300	erythrocyte membrane protein 1 (PfEMP1), exon2
PF3D7_0833400.iso1.exon3.amp1_4185	2	PF3D7_0833400	rifin
PF3D7_0900200.e2s1_8924	2	PF3D7_0900200	rifin (RIF)
PF3D7_0900500.iso1.exon1.amp1_4464	2	PF3D7_0900500	rifin
PF3D7_0901000.iso1.exon1.amp1_3010	2	PF3D7_0901000	rifin
PF3D7_0901500.iso1.exon2.amp1_4476	2	PF3D7_0901500	rifin
PF3D7_0902200.2o3_7910	2	PF3D7_0902200	serine/threonine protein kinase, FIKK family (FIKK9.3)
PF3D7_0902900.1o1_8123	2	PF3D7_0902900	conserved Plasmodium protein, unknown function
PF3D7_0903400.e1s3_8886	2	PF3D7_0903400	DEAD/DEAH box helicase, putative
PF3D7_0903700.e3s1_4884	2	PF3D7_0903700	alpha tubulin 1
PF3D7_0904900.e1s3_6567	2	PF3D7_0904900	Cu2 -transporting ATPase, putative (CUP)
PF3D7_0905400.e7s1_7466	2	PF3D7_0905400	high molecular weight rhoptry protein 3 (RhopH3)
PF3D7_0908200.iso1.exon2.amp1_4259	2	PF3D7_0908200	conserved Plasmodium protein, unknown function
PF3D7_0908300.iso2.exon2.amp1_3507	2	PF3D7_0908300	conserved Plasmodium membrane protein, unknown function
PF3D7_0909100.1o1_4745	2	PF3D7_0909100	conserved Plasmodium membrane protein, unknown function
PF3D7_0909700.iso1.exon1.amp1_1703	2	PF3D7_0909700	FHA domain protein, putative
PF3D7_0909900.iso1.exon1.amp1_1689	2	PF3D7_0909900	helicase with Zn-finger motif, putative
PF3D7_0910200.iso1.exon1.amp1_1395	2	PF3D7_0910200	conserved Plasmodium protein, unknown function
PF3D7_0911900.e2_7125	2	PF3D7_0911900	falstatin (ICP)
PF3D7_0912900.e2s1_6018	2	PF3D7_0912900	26S proteasome regulatory subunit, putative
PF3D7_0914200.3o4_7023	2	PF3D7_0914200	phospholipid or glycerol acyltransferase, putative
PF3D7_0917900.e2_8279	2	PF3D7_0917900	heat shock protein 70 (Hsp70-2)
PF3D7_0918300.e2s1_6599	2	PF3D7_0918300	eukaryotic translation initiation factor 3 subunit 5, putative
PF3D7_0918900.e1s1_7198	2	PF3D7_0918900	gamma-glutamylcysteine synthetase (gammaGCS)
PF3D7_0919800.iso1.exon1.amp1_3111	2	PF3D7_0919800	TLD domain containing protein
PF3D7_0919800.iso1.exon1.amp2_seg1_1133	2	PF3D7_0919800	TLD domain containing protein
PF3D7_0922500_7709	2	PF3D7_0922500	phosphoglycerate kinase (PGK)
PF3D7_0924600.iso1.exon1.amp1_2177	2	PF3D7_0924600	conserved Plasmodium protein, unknown function
PF3D7_0930300.s1_9167	2	PF3D7_0930300	merozoite surface protein 1 (MSP1)
PF3D7_0930300.s2_8884	2	PF3D7_0930300	merozoite surface protein 1 (MSP1)
PF3D7_0930600.iso1.exon5.amp1_2100	2	PF3D7_0930600	peptidyl-prolyl cis-trans isomerase (CYP72)
PF3D7_0932100.2o5_9117	2	PF3D7_0932100	conserved Plasmodium membrane protein, unknown function
PF3D7_0933900.4o4_5828	2	PF3D7_0933900	conserved Plasmodium protein, unknown function
PF3D7_0936400.2o2_8989	2	PF3D7_0936400	ring-exported protein 4 (REX4)
PF3D7_0936800.e2s1_5455	2	PF3D7_0936800	Plasmodium exported protein (PHISTc), unknown function
PF3D7_0937400.iso1.exon2.amp1_1296	2	PF3D7_0937400	rifin
PF3D7_0937800.iso1.exon2.amp1_1654	2	PF3D7_0937800	erythrocyte membrane protein 1, PfEMP1
PF3D7_1000200.iso1.exon1.amp1_1575	2	PF3D7_1000200	rifin
PF3D7_1001600.2o2_4757	2	PF3D7_1001600	alpha/beta hydrolase, putative
PF3D7_1002100.2o2_7048	2	PF3D7_1002100	PF70 protein (PF70)
PF3D7_1002500.1o3_8986	2	PF3D7_1002500	conserved Plasmodium protein, unknown function
PF3D7_1003800.e1s2_7780	2	PF3D7_1003800	U5 small nuclear ribonuclear protein, putative
PF3D7_1006500.1o1_7278	2	PF3D7_1006500	conserved Plasmodium protein, unknown function
PF3D7_1007300.iso1.exon1.amp1_3315	2	PF3D7_1007300	conserved Plasmodium protein, unknown function
PF3D7_1008000.s2_8597	2	PF3D7_1008000	histone deacetylase, putative
PF3D7_1009600.iso1.exon3.amp1_2459	2	PF3D7_1009600	protein phosphatase, putative
PF3D7_1011800.e1s2_7200	2	PF3D7_1011800	QF122 antigen
PF3D7_1012200.1o2_8148	2	PF3D7_1012200	conserved Plasmodium protein, unknown function
PF3D7_1012700.e1s1_7980	2	PF3D7_1012700	protein phosphatase, putative
PF3D7_1013900.iso1.exon1.amp2_seg2_4622	2	PF3D7_1013900	initiation factor 2 subunit family, putative
PF3D7_1014100.s2_5660	2	PF3D7_1014100	conserved Plasmodium protein, unknown function
PF3D7_1015900.e2s1_5752	2	PF3D7_1015900	enolase (ENO)
PF3D7_1016200.1o1_8491	2	PF3D7_1016200	conserved Plasmodium protein, unknown function
PF3D7_1016500.e1s1_7472	2	PF3D7_1016500	Plasmodium exported protein (PHISTc), unknown function
PF3D7_1020700.e1s2_8363	2	PF3D7_1020700	ribosomal processing ATPase, putative
PF3D7_1021900.e1s2_5472	2	PF3D7_1021900	conserved Plasmodium protein (10b antigen), unknown function
PF3D7_1021900.e1s3_6056	2	PF3D7_1021900	conserved Plasmodium protein (10b antigen), unknown function
PF3D7_1022000.e2_4806	2	PF3D7_1022000	RNA binding protein, putative
PF3D7_1023100.e1s4_6236	2	PF3D7_1023100	dynein heavy chain, putative
PF3D7_1028700.1o1_8478	2	PF3D7_1028700	merozoite TRAP-like protein (MTRAP)
PF3D7_1032100.iso1.exon1.amp2_4232	2	PF3D7_1032100	mRNA-decapping enzyme subunit 1, putative
PF3D7_1035300.iso1.exon1.amp1_2847	2	PF3D7_1035300	glutamate-rich protein
PF3D7_1036000.1o1_5293	2	PF3D7_1036000	merozoite surface protein (MSP11)
PF3D7_1036400.1o2_6117	2	PF3D7_1036400	liver stage antigen 1 (LSA1)
PF3D7_1036500.1o1_6762	2	PF3D7_1036500	probable protein, unknown function
PF3D7_1036600.iso2.exon3.amp1_3851	2	PF3D7_1036600	conserved Plasmodium protein, unknown function
PF3D7_1037000.iso1.exon3.amp2_4564	2	PF3D7_1037000	DNA polymerase zeta catalytic subunit, putative
PF3D7_1037100.1o1_9098	2	PF3D7_1037100	pyruvate kinase 2 (PyKII)
PF3D7_1040100.iso1.exon2.amp1_3299	2	PF3D7_1040100	rifin
PF3D7_1040400.iso1.exon2.amp1_2156	2	PF3D7_1040400	rifin
PF3D7_1041000.iso1.exon2.amp1_1280	2	PF3D7_1041000	rifin
PF3D7_1100100.iso1.exon1.amp1_4545	2	PF3D7_1100100	erythrocyte membrane protein 1, PfEMP1
PF3D7_1100100.iso1.exon2.amp1_1582	2	PF3D7_1100100	erythrocyte membrane protein 1, PfEMP1
PF3D7_1100200.e1s2_8548	2	PF3D7_1100200	erythrocyte membrane protein 1, PfEMP1 (VAR)
PF3D7_1100200.e1s3_7392	2	PF3D7_1100200	erythrocyte membrane protein 1, PfEMP1 (VAR)
PF3D7_1100300.iso1.exon2.amp1_4474	2	PF3D7_1100300	rifin
PF3D7_1100400.iso1.exon2.amp1_3590	2	PF3D7_1100400	rifin
PF3D7_1101100.iso1.exon1.amp1_3897	2	PF3D7_1101100	rifin
PF3D7_1102500.e2s1_5459	2	PF3D7_1102500	Plasmodium exported protein (PHISTb), unknown function (GEXP02)
PF3D7_1106300.2o6_8231	2	PF3D7_1106300	exonuclease, putative
PF3D7_1107400.iso1.exon1.amp1_3598	2	PF3D7_1107400	Rad51 homolog
PF3D7_1109200.3o4_6218	2	PF3D7_1109200	conserved Plasmodium protein, unknown function
PF3D7_1110200.e1s1_4895	2	PF3D7_1110200	pre-mRNA-processing factor 6, putative (PRPF6)
PF3D7_1111900.iso1.exon1.amp1_693	2	PF3D7_1111900	conserved Plasmodium protein, unknown function
PF3D7_1113000.iso1.exon3.amp1_1542	2	PF3D7_1113000	conserved Plasmodium protein, unknown function
PF3D7_1113000.iso1.exon7.amp3_1351	2	PF3D7_1113000	conserved Plasmodium protein, unknown function
PF3D7_1115300.e1s1_7187	2	PF3D7_1115300	cysteine proteinase falcipain 2b (FP2B)
PF3D7_1115400.e1s1_6025	2	PF3D7_1115400	cysteine proteinase falcipain 3
PF3D7_1116000.iso1.exon2.amp1_3093	2	PF3D7_1116000	rhoptry neck protein 4
PF3D7_1116000.iso1.exon2.amp2_3382	2	PF3D7_1116000	rhoptry neck protein 4
PF3D7_1120300.2o2_8189	2	PF3D7_1120300	metal ion channel - Mg2 , Co2 and Ni2
PF3D7_1121600.iso1.exon2.amp1_2679	2	PF3D7_1121600	circumsporozoite-related antigen
PF3D7_1122800.e1s1_6545	2	PF3D7_1122800	calcium dependent protein kinase 6 (CDPK6)
PF3D7_1123500.iso1.exon1.amp1_4580	2	PF3D7_1123500	conserved Plasmodium protein, unknown function
PF3D7_1124100.iso1.exon1.amp1_1988	2	PF3D7_1124100	neutral-sphingomyelinase activation factor protein, putative
PF3D7_1125300.iso1.exon1.amp1_2856	2	PF3D7_1125300	DNA-directed RNA polymerase
PF3D7_1125300.iso1.exon1.amp2_3352	2	PF3D7_1125300	DNA-directed RNA polymerase
PF3D7_1125800.1o4_6747	2	PF3D7_1125800	kelch protein, putative
PF3D7_1127900.3o3_6444	2	PF3D7_1127900	conserved Plasmodium protein, unknown function
PF3D7_1130200_5980	2	PF3D7_1130200	60S ribosomal protein P0
PF3D7_1132900.1o1_6392	2	PF3D7_1132900	glycine cleavage H protein (GCVH)
PF3D7_1134700.e2s1_6257	2	PF3D7_1134700	DNA-directed RNA polymerase 1, subunit 2, putative
PF3D7_1134700.e2s2_6835	2	PF3D7_1134700	DNA-directed RNA polymerase 1, subunit 2, putative
PF3D7_1137100_7714	2	PF3D7_1137100	mitochondrial ribosomal protein S9 precursor, putative
PF3D7_1138400.e1s3_5106	2	PF3D7_1138400	guanylyl cyclase (GCalpha)
PF3D7_1138400.e1s4_8575	2	PF3D7_1138400	guanylyl cyclase (GCalpha)
PF3D7_1139300.e2s3_8649	2	PF3D7_1139300	transcription factor with AP2 domain(s) (ApiAP2)
PF3D7_1139500.1.e1s1_5751	2	PF3D7_1139500.1	AAA family ATPase, putative
PF3D7_1140100 (renamed)_5564	2	PF3D7_1140100	vacuolar ATP synthase subunit f, putative
PF3D7_1145400.e1s1_8368	2	PF3D7_1145400	dynamin-like protein (DYN1)
PF3D7_1146700.iso1.exon1.amp1_3331	2	PF3D7_1146700	kinesin-like protein, putative
PF3D7_1149000.e1s1_5748	2	PF3D7_1149000	antigen 332, DBL-like protein (Pf332)
PF3D7_1149200.e2s1_6829	2	PF3D7_1149200	ring-infected erythrocyte surface antigen
PF3D7_1149200.e2s2_6546	2	PF3D7_1149200	ring-infected erythrocyte surface antigen
PF3D7_1149500.e2_6825	2	PF3D7_1149500	ring-infected erythrocyte surface antigen 2, pseudogene (RESA2)
PF3D7_1150300.iso1.exon1.amp1_2740	2	PF3D7_1150300	rifin
PF3D7_1200100.iso1.exon1.amp2_794	2	PF3D7_1200100	erythrocyte membrane protein 1, PfEMP1
PF3D7_1200300.e2s1_7189	2	PF3D7_1200300	rifin (RIF)
PF3D7_1200400.iso1.exon2.amp1_720	2	PF3D7_1200400	erythrocyte membrane protein 1, PfEMP1
PF3D7_1200600.iso1.exon2.amp3_2805	2	PF3D7_1200600	erythrocyte membrane protein 1, PfEMP1
PF3D7_1201400.iso1.exon1.amp1_218	2	PF3D7_1201400	Plasmodium exported protein, unknown function
PF3D7_1202300.e33s1_5173	2	PF3D7_1202300	dynein heavy chain, putative
PF3D7_1203700.e3_8270	2	PF3D7_1203700	nucleosome assembly protein (NAPL)
PF3D7_1203900 (renamed)_7587	2	PF3D7_1203900	ubiquitin conjugating enzyme E2, putative (UBC)
PF3D7_1204300_6840	2	PF3D7_1204300	eukaryotic translation initiation factor 5A (EIF5A)
PF3D7_1206100.e2s1_6587	2	PF3D7_1206100	IMP-specific 5'-nucleotidase, putative,haloacid dehalogenase hydrolase, putative
PF3D7_1206900.4o4_7049	2	PF3D7_1206900	conserved Plasmodium protein, unknown function
PF3D7_1210600.iso1.exon1.amp1_4021	2	PF3D7_1210600	conserved Plasmodium protein, unknown function
PF3D7_1212800_6558	2	PF3D7_1212800	iron-sulfur subunit of succinate dehydrogenase
PF3D7_1216500.e1s1_7177	2	PF3D7_1216500	male development gene 1 (MDV1)
PF3D7_1219300.iso1.exon1.amp1_4486	2	PF3D7_1219300	erythrocyte membrane protein 1, PfEMP1
PF3D7_1219600.iso1.exon3.amp1_2541	2	PF3D7_1219600	aminophospholipid-transporting P-ATPase
PF3D7_1221000.e1s3_4910	2	PF3D7_1221000	histone-lysine N-methyltransferase, H3 lysine-4 specific (SET10)
PF3D7_1221400.e1s1_6610	2	PF3D7_1221400	membrane skeletal protein, putative (ALV3)
PF3D7_1221600.1o1_4708	2	PF3D7_1221600	conserved Plasmodium protein, unknown function
PF3D7_1222600 (renamed, has duplicates)_6843	2	PF3D7_1222600	transcription factor with AP2 domain(s) (ApiAP2)
PF3D7_1222700.1o1_8121	2	PF3D7_1222700	glideosome-associated protein 45 (GAP45)
PF3D7_1223800.iso1.exon1.amp1_short_2872	2	PF3D7_1223800	mitochondrial carrier protein, putative
PF3D7_1224500.2o2_4969	2	PF3D7_1224500	chromatin assembly protein (ASF1), putative
PF3D7_1227200.iso1.exon1.amp2_815	2	PF3D7_1227200	potassium channel protein
PF3D7_1230000.iso1.exon2.amp1_2063	2	PF3D7_1230000	conserved Plasmodium protein, unknown function
PF3D7_1236000.1o1_6739	2	PF3D7_1236000	conserved Plasmodium protein, unknown function
PF3D7_1238800.e1s1_6061	2	PF3D7_1238800	acyl-CoA synthetase, PfACS11 (ACS11)
PF3D7_1239700.e1s1_5983	2	PF3D7_1239700	cell division protein FtsH, putative
PF3D7_1240300.iso1.exon2.amp1_4487	2	PF3D7_1240300	erythrocyte membrane protein 1, PfEMP1
PF3D7_1240600.iso1.exon2.amp1_2168	2	PF3D7_1240600	erythrocyte membrane protein 1, PfEMP1
PF3D7_1244600.e1s1_6033	2	PF3D7_1244600	ADP-ribosylation factor GTPase-activating protein, putative
PF3D7_1246300.iso1.exon6.amp1_2708	2	PF3D7_1246300	conserved Plasmodium protein, unknown function
PF3D7_1246900.iso1.exon1.amp1_721	2	PF3D7_1246900	RAC-beta serine/threonine protein kinase
PF3D7_1248400.iso1.exon1.amp1_2715	2	PF3D7_1248400	conserved Plasmodium protein, unknown function
PF3D7_1250100.e1s1_6645	2	PF3D7_1250100	osmiophilic body protein (Pfg377)
PF3D7_1250600_5073	2	PF3D7_1250600	eukaryotic translation initiation factor 2b, subunit 2, putative
PF3D7_1252100.e7s1_6035	2	PF3D7_1252100	rhoptry neck protein 3 (RON3)
PF3D7_1252700.2o2_8754	2	PF3D7_1252700	Plasmodium exported protein (PHISTb), unknown function
PF3D7_1254100.e2s1_5739	2	PF3D7_1254100	stevor (stevor)
PF3D7_1254300.iso1.exon2.amp1_2431	2	PF3D7_1254300	stevor
PF3D7_1254500.iso1.exon2.amp1_114	2	PF3D7_1254500	rifin
PF3D7_1254600.iso1.exon2.amp1_2720	2	PF3D7_1254600	stevor
PF3D7_1254700.iso1.exon1.amp1_2440	2	PF3D7_1254700	rifin
PF3D7_1255100.iso1.exon2.amp1_3024	2	PF3D7_1255100	rifin
PF3D7_1300200.iso1.exon1.amp1_3602	2	PF3D7_1300200	rifin
PF3D7_1300400.iso1.exon2.amp1_1295	2	PF3D7_1300400	rifin
PF3D7_1300700.iso1.exon1.amp1_2725	2	PF3D7_1300700	rifin
PF3D7_1300800.iso1.exon3.amp1_3282	2	PF3D7_1300800	erythrocyte membrane protein 1-like
PF3D7_1301500.2o2_8722	2	PF3D7_1301500	Plasmodium exported protein (PHISTa), unknown function
PF3D7_1301600.iso1.exon4.amp2_1680	2	PF3D7_1301600	erythrocyte binding antigen-140
PF3D7_1302000.2o2_6994	2	PF3D7_1302000	Plasmodium exported protein, unknown function
PF3D7_1302100.e1s1_8333	2	PF3D7_1302100	gamete antigen 27/25 (Pfg27)
PF3D7_1302600.1o1_4710	2	PF3D7_1302600	deoxyhypusine hydroxylase (DOHH)
PF3D7_1302700.iso1.exon1.amp2_1069	2	PF3D7_1302700	DEAD/DEAH box ATP-dependent RNA helicase, putative
PF3D7_1304100.e2s1_5115	2	PF3D7_1304100	DNA ligase I (LigI)
PF3D7_1305300.iso1.exon2.amp1_197	2	PF3D7_1305300	conserved Plasmodium protein, unknown function
PF3D7_1305400.iso1.exon2.amp1_2469	2	PF3D7_1305400	conserved Plasmodium protein, unknown function
PF3D7_1306400_8871	2	PF3D7_1306400	26S proteasome regulatory subunit, putative
PF3D7_1306500.e3s3_6272	2	PF3D7_1306500	MORN repeat protein, putative
PF3D7_1310200.2o2_8992	2	PF3D7_1310200	conserved Plasmodium protein, unknown function
PF3D7_1311000 (renamed)_8744	2	PF3D7_1311000	conserved Plasmodium protein, unknown function
PF3D7_1313700.iso1.exon1.amp1_2424	2	PF3D7_1313700	septum formation protein MAF homologue, putative
PF3D7_1314500.iso1.exon2.amp1_2631	2	PF3D7_1314500	cop-coated vesicle membrane protein p24 precursor, putative
PF3D7_1316100.iso1.exon1.amp2_756	2	PF3D7_1316100	inositol polyphosphate kinase, putative
PF3D7_1318400.iso1.exon1.amp1_2986	2	PF3D7_1318400	chromosome segregation protein, putative
PF3D7_1318400.iso1.exon2.amp1_1380	2	PF3D7_1318400	chromosome segregation protein, putative
PF3D7_1318400.iso1.exon2.amp2_1669	2	PF3D7_1318400	chromosome segregation protein, putative
PF3D7_1319400 (renamed)_6913	2	PF3D7_1319400	conserved Plasmodium protein, unknown function
PF3D7_1320700.iso1.exon1.amp2_4220	2	PF3D7_1320700	conserved Plasmodium protein, unknown function
PF3D7_1321300.e1s1_7716	2	PF3D7_1321300	conserved Plasmodium membrane protein, unknown function
PF3D7_1322100.iso1.exon1.amp3_3673	2	PF3D7_1322100	SET domain protein, putative
PF3D7_1322200 (renamed)_6562	2	PF3D7_1322200	conserved Plasmodium protein, unknown function
PF3D7_1324800.1o4_5595	2	PF3D7_1324800	dihydrofolate synthase/folylpolyglutamate synthase (DHFS-FPGS)
PF3D7_1324900.e1s1_8345	2	PF3D7_1324900	L-lactate dehydrogenase (LDH)
PF3D7_1326800.1o1_7308	2	PF3D7_1326800	syntaxin, Qa-SNARE family (SYN18)
PF3D7_1328200.iso1.exon3.amp1_4145	2	PF3D7_1328200	conserved Plasmodium protein, unknown function
PF3D7_1329000.e1s2_6850	2	PF3D7_1329000	DNA-directed RNA polymerase 3 largest subunit
PF3D7_1329500.iso1.exon1.amp2_3671	2	PF3D7_1329500	conserved Plasmodium protein, unknown function
PF3D7_1331000.1o1_5311	2	PF3D7_1331000	protein kinase, putative
PF3D7_1331100.iso1.exon5.amp1_1893	2	PF3D7_1331100	DEAD box helicase, putative
PF3D7_1332900.e1s1_8365	2	PF3D7_1332900	isoleucine-tRNA ligase, putative
PF3D7_1334000.iso1.exon1.amp1_1879	2	PF3D7_1334000	conserved Plasmodium protein, unknown function
PF3D7_1334100.1o1_5354	2	PF3D7_1334100	conserved Plasmodium protein, unknown function
PF3D7_1335300.e1s2_6904	2	PF3D7_1335300	reticulocyte binding protein 2 homologue b (RH2b)
PF3D7_1335900_7674	2	PF3D7_1335900	sporozoite surface protein 2 (TRAP)
PF3D7_1338300.e2s1_7486	2	PF3D7_1338300	elongation factor 1-gamma, putative
PF3D7_1342600.e3s1_6632	2	PF3D7_1342600	myosin A (MyoA)
PF3D7_1343400.iso1.exon3.amp2_2487	2	PF3D7_1343400	DNA helicase, putative
PF3D7_1343800.iso1.exon1.amp5_seg2_4068	2	PF3D7_1343800	conserved Plasmodium protein, unknown function
PF3D7_1344900.iso1.exon1.amp2_2196	2	PF3D7_1344900	conserved Plasmodium protein, unknown function
PF3D7_1346400.e1s3_5118	2	PF3D7_1346400	conserved Plasmodium protein, unknown function
PF3D7_1348000.iso1.exon1.amp2_1325	2	PF3D7_1348000	conserved Plasmodium protein, unknown function
PF3D7_1348200.iso1.exon2.amp1_976	2	PF3D7_1348200	step II splicing factor, putative
PF3D7_1348800.2o4_7958	2	PF3D7_1348800	E1-E2 ATPase, putative
PF3D7_1351300.2o2_5557	2	PF3D7_1351300	conserved Plasmodium membrane protein, unknown function
PF3D7_1351700.iso1.exon3.amp1_3415	2	PF3D7_1351700	alveolin, putative
PF3D7_1351800.1.1o1_7839	2	PF3D7_1351800.1	conserved Plasmodium protein, unknown function
PF3D7_1353100.e1s1_6865	2	PF3D7_1353100	Plasmodium exported protein, unknown function
PF3D7_1353100.e2s1_8339	2	PF3D7_1353100	Plasmodium exported protein, unknown function
PF3D7_1353700.1o1_5245	2	PF3D7_1353700	conserved Plasmodium protein, unknown function
PF3D7_1356400.iso1.exon1.amp1_4065	2	PF3D7_1356400	phosphatase 2A regulatory subunit-related protein, putative
PF3D7_1356400.iso1.exon1.amp2_3669	2	PF3D7_1356400	phosphatase 2A regulatory subunit-related protein, putative
PF3D7_1357000.e1s1_7180	2	PF3D7_1357000	elongation factor 1-alpha
PF3D7_1359300.iso1.exon1.amp1_4593	2	PF3D7_1359300	mitotic control protein dis3 homologue, putative
PF3D7_1359300.iso1.exon1.amp2_3957	2	PF3D7_1359300	mitotic control protein dis3 homologue, putative
PF3D7_1363400.iso1.exon1.amp1_3340	2	PF3D7_1363400	conserved Plasmodium protein, unknown function
PF3D7_1368100.e2s1_7178	2	PF3D7_1368100	proteasome regulatory subunit, putative
PF3D7_1368400.iso1.exon6.amp1_2409	2	PF3D7_1368400	conserved Plasmodium protein, unknown function
PF3D7_1373100.iso1.exon1.amp1_3029	2	PF3D7_1373100	rifin
PF3D7_1373300.iso1.exon2.amp1_4186	2	PF3D7_1373300	rifin
PF3D7_1373400.iso1.exon2.amp1_2732	2	PF3D7_1373400	rifin
PF3D7_1373500.iso1.exon1.amp1_2457	2	PF3D7_1373500	erythrocyte membrane protein 1, PfEMP1
PF3D7_1400300.iso1.exon1.amp1_2146	2	PF3D7_1400300	rifin
PF3D7_1405000.iso1.exon4.amp1_4111	2	PF3D7_1405000	conserved Plasmodium protein, unknown function
PF3D7_1405500.1o1_7047	2	PF3D7_1405500	conserved Plasmodium protein, unknown function
PF3D7_1408700.e2s2_6345	2	PF3D7_1408700	conserved Plasmodium protein, unknown function
PF3D7_1411600.1o1_8493	2	PF3D7_1411600	GTP binding protein, putative
PF3D7_1412200.iso1.exon2.amp1_1899	2	PF3D7_1412200	conserved Plasmodium protein, unknown function
PF3D7_1414600.e1s1_6026	2	PF3D7_1414600	RNA guanylyltransferase (Pgt1)
PF3D7_1415000.iso1.exon1.amp1_2734	2	PF3D7_1415000	uracil-DNA glycosylase, putative
PF3D7_1419400.e1s1_6636	2	PF3D7_1419400	conserved Plasmodium membrane protein, unknown function
PF3D7_1427200.1o2_8707	2	PF3D7_1427200	selenoprotein (Sel4)
PF3D7_1427600.1o1_7603	2	PF3D7_1427600	CorA-like Mg2 transporter protein, putative
PF3D7_1430300.iso1.exon1.amp1_4287	2	PF3D7_1430300	acid phosphatase, putative
PF3D7_1431100.e1s1_5166	2	PF3D7_1431100	conserved Plasmodium protein, unknown function
PF3D7_1433800.iso1.exon1.amp3_2788	2	PF3D7_1433800	conserved Plasmodium protein, unknown function
PF3D7_1434700.1o1_7846	2	PF3D7_1434700	mitochondrial import inner membrane translocase subunit tim17, putative
PF3D7_1435300.e1s2_7506	2	PF3D7_1435300	NAD(P)H-dependent glutamate synthase, putative
PF3D7_1435300.e1s4_4904	2	PF3D7_1435300	NAD(P)H-dependent glutamate synthase, putative
PF3D7_1438800.4o4_9081	2	PF3D7_1438800	conserved Plasmodium protein, unknown function
PF3D7_1440300.4o6_7303	2	PF3D7_1440300	delta-aminolevulinic acid dehydratase (ALAD)
PF3D7_1441700.iso1.exon1.amp1_3909	2	PF3D7_1441700	conserved Plasmodium protein, unknown function
PF3D7_1448500.e1s4_8593	2	PF3D7_1448500	chloroquine resistance marker protein (CRMP)
PF3D7_1449100.iso1.exon2.amp1_short_3155	2	PF3D7_1449100	conserved Plasmodium protein, unknown function
PF3D7_1451100_7386	2	PF3D7_1451100	elongation factor 2
PF3D7_1451400.iso1.exon1.amp1_seg1_3165	2	PF3D7_1451400	transcriptional regulatory protein sir2b
PF3D7_1451500.1o1_7836	2	PF3D7_1451500	conserved Plasmodium protein, unknown function
PF3D7_1452000.s1_6816	2	PF3D7_1452000	rhoptry neck protein 2 (RON2)
PF3D7_1456100.1o1_7024	2	PF3D7_1456100	serine hydroxymethyltransferase, putative (SHMT)
PF3D7_1459600.iso1.exon1.amp1_3337	2	PF3D7_1459600	conserved Plasmodium protein, unknown function
PF3D7_1459600.iso1.exon2.amp1_2130	2	PF3D7_1459600	conserved Plasmodium protein, unknown function
PF3D7_1461800.e1s1_8881	2	PF3D7_1461800	conserved Plasmodium protein, unknown function
PF3D7_1464000.e1s1_6353	2	PF3D7_1464000	YL1 nuclear protein, putative
PF3D7_1466200.e1s2_7800	2	PF3D7_1466200	conserved Plasmodium protein, unknown function
PF3D7_1466200.e1s3_7511	2	PF3D7_1466200	conserved Plasmodium protein, unknown function
PF3D7_1468100.e2s2_5699	2	PF3D7_1468100	conserved Plasmodium protein, unknown function
PF3D7_1468300.iso1.exon2.amp1_2138	2	PF3D7_1468300	leucine-rich repeat protein
PF3D7_1469300.iso1.exon1.amp1_4164	2	PF3D7_1469300	small subunit rRNA processing KH domain protein, putative
PF3D7_1469700.iso1.exon1.amp1_3290	2	PF3D7_1469700	conserved Plasmodium protein, unknown function
PF3D7_1470200.2o3_6102	2	PF3D7_1470200	conserved Plasmodium protein, unknown function
PF3D7_1470500.5o6_7066	2	PF3D7_1470500	phosphodiesterase delta, putative (PDEdelta)
PF3D7_1472200.e1s2_8556	2	PF3D7_1472200	histone deacetylase, putative
PF3D7_1474000.iso1.exon1.amp3_3078	2	PF3D7_1474000	probable protein, unknown function
PF3D7_1476500.2o2_5550	2	PF3D7_1476500	probable protein, unknown function

## Sheet: Group3Increased in nonProtected
unique_ID	count_nonprotec_increased_HD	Gene.ID	Description
PF3D7_1133400_6235	14	PF3D7_1133400	apical membrane antigen 1 (AMA1)
