# Supplementary material for: Proteome-wide analysis of a malaria vaccine study reveals personalized humoral immune profiles in Tanzanian adults
Source: eLife. 2020 Jul 14;9:e53080. doi: 10.7554/eLife.53080 (PMC7386907; doi:10.7554/eLife.53080)
Supplement: Source data 1. [file elife-53080-data1.csv]

Index	GeneID	Product.Description	Gene.Name	CDS	AA.Seq	AA.Len	N.TM	SignalP	SignalP_yn	Predicted.GO.Component.IDs	Curated.GO.Component.IDs	All.GO.Component.IDs	GO_0000015	GO_0000139	GO_0000151	GO_0000172	GO_0000178	GO_0000214	GO_0000221	GO_0000275	GO_0000276	GO_0000439	GO_0000502	GO_0000775	GO_0000786	GO_0000796	GO_0000930	GO_0000940	GO_0005576	GO_0005578	GO_0005581	GO_0005622	GO_0005634	GO_0005663	GO_0005665	GO_0005666	GO_0005669	GO_0005672	GO_0005673	GO_0005674	GO_0005681	GO_0005685	GO_0005694	GO_0005730	GO_0005737	GO_0005739	GO_0005740	GO_0005741	GO_0005743
5295	PF3D7_1472200	histone deacetylase, putative	HDA1	ATGGATATCGTTAAGGATGAAAGAAATATTCGTTATGAATACGAATTAGATAAAATAAAAAAGAAGAAGAAGGATAACCTTTTAATTATGAATATATTGTATAATAAGATAAATTATATATGTTATATATTAAAAAGCAATCATCGAGATATATTGAATGATATAAACTTTGAGAATAGAACGGCTATAGAAATATGTTTATATTATTGTAAATCATATATATTATTTTTATTATTATTTTATCCATATTTACATAATTATATAAGAATTTTAAAAAATAATGATTTACGATTATATAAGAATTTTTATAAGTATATATTAAAAAGACGAAATAATTTGCATATCTTATTATTAAAATATCGAATACTTGAATGCATGAAATTAAAAGATAAGGATGTT…	MDIVKDERNIRYEYELDKIKKKKKDNLLIMNILYNKINYICYILKSNHRDILNDINFENRTAIEICLYYCKSYILFLLLFYPYLHNYIRILKNNDLRLYKNFYKYILKRRNNLHILLLKYRILECMKLKDKDVNDSNTISYIDVYSMNRYMNDEDDIDKYYYKPKFSYKNNNMNNLLLLNVYFKDIMSKNNFICILFSRIYIKKYHKKIFRILLLILFYFSLPTFPFSKKFFITYHNWRDTEKDKIKEENEENHTNTKGINNSTYDNIYRSVLEDKVEGKLIEHNKNISKNNVGVQAVQEGVVYGTEEILKNENKGTGGMQGNNIKKKKDRGKKKDMDEDFSFYCKRKYFTTPFFEHINIPTIHINDYFCSGNKIFEREEFKVINEKKNKKKKDNTNKY…	2251	3	null	no	GO_0016020	GO_0000118	GO_0016020,GO_0000118	0	0	0	0	0	0	0	0	0	0	0	0	0	0	0	0	0	0	0	0	0	0	0	0	0	0	0	0	0	0	0	0	0	0	0	0	0
5177	PF3D7_1460400	ubiquitin carboxyl-terminal hydrolase isozyme L3	UCHL3	ATGGCAAAGAATGATATTTGGACACCTTTAGAGTCCAATCCCGATTCTTTATATTTATATTCTTGTAAACTTGGACAGTCAAAATTAAAATTTGTGGACATCTATGGTTTTAATAATGATTTATTGGATATGATTCCACAACCTGTTCAAGCGGTTATATTTTTATATCCTGTAAATGATAATATAGTTTCTGAAAACAATACCAATGATAAGCACAATTTGAAAGAAAATTTTGATAACGTCTGGTTTATAAAACAATACATTCCAAACTCATGTGGAACCATAGCCTTGTTACATTTATACGGAAATTTAAGGAATAAATTCGAACTAGATAAGGATTCTGTTTTGGATGATTTCTTTAATAAAGTTAATGAGATGTCTGCCGAAAAAAGAGGACAG…	MAKNDIWTPLESNPDSLYLYSCKLGQSKLKFVDIYGFNNDLLDMIPQPVQAVIFLYPVNDNIVSENNTNDKHNLKENFDNVWFIKQYIPNSCGTIALLHLYGNLRNKFELDKDSVLDDFFNKVNEMSAEKRGQELKNNKSIENLHHEFCGQVENRDDILDVDTHFIVFVQIEGKIIELDGRKDHPTVHCFTNGDNFLYDTGKIIQDKFIEKCKDDLRFSALAVIPNDNFDII	232	0	null	no	GO_0005622	GO_0000151	GO_0005622,GO_0000151	0	0	1	0	0	0	0	0	0	0	0	0	0	0	0	0	0	0	0	1	0	0	0	0	0	0	0	0	0	0	0	0	0	0	0	0	0
1642	PF3D7_0720000	exosome complex component CSL4, putative	CSL4	ATGAATTTTGAAGATGACGATGATATTGTTATACCAGGAGAGTTCTTAGGTTTACAAGCTGAATATATAAACGGTAATAATACATATTTATTAAAAGATGAAATAAGATCAAGTATACTTGGTCAAAAAATTATAAATAAAAATAATGACAAGAAAACAATTATAAGTGTATATAATTTGAAACCACCTTCTTTATATCTTCCCAAAATAGGGGATATAGTAATATGTAAAGTACAACGTGTATCATTCCATATGATATATTGTTATATTCTTTCATCACATAATATATTTACAAAAAACGCATTAAAAGGATTTATATTAAAAAGTGATATACATATAAATGAAGGAGAGTTAGGCGATAATTTTATATGCTTTAAACAAGGAGATATAATAAAAGCT…	MNFEDDDDIVIPGEFLGLQAEYINGNNTYLLKDEIRSSILGQKIINKNNDKKTIISVYNLKPPSLYLPKIGDIVICKVQRVSFHMIYCYILSSHNIFTKNALKGFILKSDIHINEGELGDNFICFKQGDIIKAKVLSIGQYSSYKLSTVGSELGVIAAFNQKGEILRPVAWNLVLNINDMTFERRKASNDFSLLL	195	0	null	no	GO_0000178	GO_0000178	GO_0000178,GO_0000178	0	0	0	0	1	0	0	0	0	0	0	0	0	0	0	0	0	0	0	0	0	0	0	0	0	0	0	0	0	0	0	0	0	0	0	0	0
5069	PF3D7_1449700	exosome complex exonuclease RRP6	RRP6	ATGGAAGAATGTAGTAGAAAGCTAGAAGAATTATTAAAAAAAAAGGGAAAAGGATTAACGCAGGTTTTATCAGATGTTGATAATGATAAAAGGAACAATGATATTAATAGTAATAATAATTATTGTATGATGAAGAATTTGTTAAATAATGTTGTAGATATAGTAAAGCTAACGAATAAAATTACTTACAATTCTTTATATAATGATGACATAGATATGTTAAGAAATAATAATGTGGATATAAAAAATTTACAAACTGATTTGTTAAAAATTGTTTATGATTTATTACATCATAGTAGTAATGAAATGAAACAAAAAGAATTAGTAAATATAAAAAAGGATGATAATTGTAATTTTTTAAAAGATAATTATCATATAATATCATCCACATTAGAAGAT…	MEECSRKLEELLKKKGKGLTQVLSDVDNDKRNNDINSNNNYCMMKNLLNNVVDIVKLTNKITYNSLYNDDIDMLRNNNVDIKNLQTDLLKIVYDLLHHSSNEMKQKELVNIKKDDNCNFLKDNYHIISSTLEDIYFRIRHSVLFFHKDIQGLKDNHNKNDYNTKNDISCERNNNSVKTEHNNICETKFVEENKNNNILSHHIINKEKNDNIELIKKKTIKDEQKIYVNDEDVVIIKDDDIKKLCDNTKLCEHEIIDDNNNHCNDIPIEENKKRFNNADIKTKKDINKNNVKNYHNNNIKENKPYNNIMNAKMQKNIKQKKTDKKKKNKTDMEFFKEYSNKIQNMWLHLTNNYSKYFIPRIPFKYNKLVDLEYDLIEAMKWQEDNIKKKLILLNMQKNYE…	1136	0	null	no	GO_0005622	GO_0000178, GO_0034399	GO_0005622,GO_0000178,GO_0034399	0	0	0	0	1	0	0	0	0	0	0	0	0	0	0	0	0	0	0	1	0	0	0	0	0	0	0	0	0	0	0	0	0	0	0	0	0
3949	PF3D7_1306600	V-type proton ATPase subunit H, putative	null	ATGGCAAATGATAGTGGTATCAGTGTAATAACAAAAATTGTGGAGTCTGAACAAAAGAATCAAATATTACATGATTCTATTTTGAATAAGATGCCTTGTTATGATAAATATGAAGAGATCAATATTTTGTCAGTTGAAGAAGTAGGGTTATTAAAAAAGTTTCATGATTTTAGTAAAAAGGAAAAATATGAATATTTTAAAGAAAACGATACTATAGTATCAATATTATTTAATTGTTTACAAACAGATTTCAATCTTCATTTAATGCAATATGTATTAACAATATTTTATGAAATAATAAGAAATGATGGAAGTTCTTATAGTTATATATTAGGTATATTACATGATAAAGACATGTATGGATATTTGATGAAGTTATGTACACATAGTGATACGTAT…	MANDSGISVITKIVESEQKNQILHDSILNKMPCYDKYEEINILSVEEVGLLKKFHDFSKKEKYEYFKENDTIVSILFNCLQTDFNLHLMQYVLTIFYEIIRNDGSSYSYILGILHDKDMYGYLMKLCTHSDTYIADKSSFLLSGSFCYNNNYFTEVQIKEFIIKIDFFNVSEEGKMDIYINILKIDNFRKDIYELEQFTSIIKKNLELSNNNANKQYKSVFCVWLLTFKDYFIKQLYKNNIIAIVINLFKKCRVEKILRVSLNIIKNIMHIDDCFEIIVDNNIIQTMTVLQYDKWRDNDIYDTIVQLLNKLDQRIKNYSNFERYCHELSNGKLKWSVLHTEKFWLENVMQFEKDEFKAIQQLADIIKLYAHNIIQKSETGESKEEIDAVTVAVACFDIG…	455	0	null	no	GO_0000221	GO_0000221	GO_0000221,GO_0000221	0	0	0	0	0	0	1	0	0	0	0	0	0	0	0	0	0	0	0	0	0	0	0	0	0	0	0	0	0	0	0	0	0	0	0	0	0
3260	PF3D7_1140100	V-type proton ATPase subunit F, putative	null	ATGGCATCACGAAGACATAGACTATTTAATGAAACGGATTTAAAGATATATATTATTGGAGATGAAGACTCAGTAGTAGGTTTTTTATTAGCTGGAATTGGCTTTCGTGATGGTCTAGGAAAAAAAAATTTTTTCATAGTCAATTCAAAAACTAATAAAAGTGAAATTGAAGAAGTTTTCAAAGAGTATTCTTCAAAACATGACTGTGGAGTAATACTTATTAATCAACAAATTGCCGATGAAATTAGATATCTAGTTGATTTACATGATAAAATATTACCAACTGTCCTTGAAATACCATCAAAAGATAAACCTTTTGATCCAAACAAAGATTCTATAATTCAAAGAGTCAAACTCTTTTTTGGAGGAGATATTTCTCATCTATAA	MASRRHRLFNETDLKIYIIGDEDSVVGFLLAGIGFRDGLGKKNFFIVNSKTNKSEIEEVFKEYSSKHDCGVILINQQIADEIRYLVDLHDKILPTVLEIPSKDKPFDPNKDSIIQRVKLFFGGDISHL	128	0	null	no	GO_0033180	GO_0000221	GO_0033180,GO_0000221	0	0	0	0	0	0	1	0	0	0	0	0	0	0	0	0	0	0	0	0	0	0	0	0	0	0	0	0	0	0	0	0	0	0	0	0	0
1853	PF3D7_0810100	apicoplast ribosomal protein L33 precursor, putative	null	ATGAAACCATGTGATCTTTTCATTTACTTATTTTTGTATATTTTTATAATAATGAAATGTTATGATTTTTTCATAATTCCAAAGAATATGAAAATGGTTAAGAATCCTATTTATCAAAATAGATATACAGACAATAAAAGAAATGCACTTTTATATGCAAAAAAAAAAAGGAACAGAAAAGTAGTGATATTAGAATGTACTGAAGCAAGAAAATTGGGAAAGCAGCCATCAAGATATGTAACGGAAAAAAATAAAAATAATACTCCAAAAAAATTACAATTATATAAATACAATAAATATCTTAAAAGAAGAACATTACACGTTGAAATAAAATAG	MKPCDLFIYLFLYIFIIMKCYDFFIIPKNMKMVKNPIYQNRYTDNKRNALLYAKKKRNRKVVILECTEARKLGKQPSRYVTEKNKNNTPKKLQLYKYNKYLKRRTLHVEIK	111	1	HMM: MKPCDLFIYLFLYIFIIMKCY, NN: MKPCDLFIYLFLYIFIIMKCY	yes	GO_0005622, GO_0005840	GO_0000311	GO_0005622,GO_0005840,GO_0000311	0	0	0	0	0	0	0	0	0	0	0	0	0	0	0	0	0	0	0	1	0	0	0	0	0	0	0	0	0	0	0	0	0	0	0	0	0
4627	PF3D7_1404400	mitochondrial ribosomal protein L16 precursor, putative	null	ATGCCCCCAATAATTTATAAAAGTCCTCTACCTGTTCGATTAAAAGCCCCGAAGGGTAGAATAACACCTTTGAATGGACCCGATATAAAAATTGGGAAATCATTAATAGCTGCCTGTCCAAAAAGAATAAGAGGAGAAAAATTAGCTGAAATGAAACAAACAATACGTAAGTATTTAGGAAAGAAAAAAGAATATTTGATTGATGTTCATGCAACTTATAGTGTAACAAAAAAACCTGATGGAACAAAAATGGGACAAGGTAAAGGAATCATTGATCATTTTGTAGCTAGAGTACCTTCAGGAAAAACTATTTTTTCTATACCTACCATAAGCCCATTCAATACATTAGGGTTTGATGACCCTGTATATAGAGTATTAAAAAAAGCAGCAGCAAAAGTA…	MPPIIYKSPLPVRLKAPKGRITPLNGPDIKIGKSLIAACPKRIRGEKLAEMKQTIRKYLGKKKEYLIDVHATYSVTKKPDGTKMGQGKGIIDHFVARVPSGKTIFSIPTISPFNTLGFDDPVYRVLKKAAAKVAIPCVFRTQNNLFRVHNIKYISQQKVKNDQLKHFNQFKSKLFQKKDEV	181	0	null	no	GO_0005840	GO_0000311	GO_0005840,GO_0000311	0	0	0	0	0	0	0	0	0	0	0	0	0	0	0	0	0	0	0	0	0	0	0	0	0	0	0	0	0	0	0	0	0	0	0	0	0
4521	PF3D7_1365100	mitochondrial ribosomal protein S17 precursor, putative	null	ATGATAAGGCTAAACAAAACTTATTCTTATTGGCATTATAAAGCCTGGCAAAGGGCAACAGCTGGATATCTTAGAACGTTTCTTAAAAACAATCTTGCTAATAAGGAAATGATTGGATATGTAATTAATGACAAGCACCCCAAAAGTATAAGAGTAGCTTGTGATAGATATATGTATGTTGTTAGATACAAAAAAACCTTCAGATATACAAAAAAAATATGGGCCCATGACGAAAAAAGTGAAGCCAAAGTTGGGGACGTTGTGCGTATTCAACCGCTAGGATATAGAATTGGACCTTGGAAAAATTATATCCTTGTAAAAATTTTATACAAGGAAAATAAAGATTAA	MIRLNKTYSYWHYKAWQRATAGYLRTFLKNNLANKEMIGYVINDKHPKSIRVACDRYMYVVRYKKTFRYTKKIWAHDEKSEAKVGDVVRIQPLGYRIGPWKNYILVKILYKENKD	115	0	null	no	GO_0005622, GO_0005840	GO_0000314, GO_0005840	GO_0005622,GO_0005840,GO_0000314,GO_0005840	0	0	0	0	0	0	0	0	0	0	0	0	0	0	0	0	0	0	0	1	0	0	0	0	0	0	0	0	0	0	0	0	0	0	0	0	0
2964	PF3D7_1110600	mitochondrial ribosomal protein L11 precursor, putative	null	ATGTCCAGAATAGGAAGATTTAATTTAATCGTTTTGTCTGGTACGGCAAAACCAAGCGCAAGTATTGGACAAACCCTGGGACCACTAGGTATAAATATGATGACGTTTTTTAAAGAATTCAATGATAGAACGAAATGTATAGCCAAAAATGTACCAATACAAGTTACATTAGAACCTTTAAACGATAGAACGTATAGATTTTATTTAAGAACACCTACTGTTGTGTGGTTTATTAGAAGATGTGCAAGAGTTCCTATGTTTAGCTCTATGGCAAAACATAATACTGTTGGTTCCATAACCCTAGCTGAAGTTTTTCATATTGCCAAGTGTAAACGTATGGATCCACCTTTGATAAATTTATCCTTAAAGAGTATATGTAAATATATTATTGGAACATGC…	MSRIGRFNLIVLSGTAKPSASIGQTLGPLGINMMTFFKEFNDRTKCIAKNVPIQVTLEPLNDRTYRFYLRTPTVVWFIRRCARVPMFSSMAKHNTVGSITLAEVFHIAKCKRMDPPLINLSLKSICKYIIGTCNSMGIRVCKELNDEEKKKYFVDVNKLDNIKKDIRTRNKQQKRSKK	178	0	null	no	GO_0005840	GO_0000315	GO_0005840,GO_0000315	0	0	0	0	0	0	0	0	0	0	0	0	0	0	0	0	0	0	0	0	0	0	0	0	0	0	0	0	0	0	0	0	0	0	0	0	0
4221	PF3D7_1333700	histone H3-like centromeric protein CSE4	CenH3	ATGGTGAGAACAAAAAAGAATATACCAAATCATAACCCCTTAAATGCATTTAATAGGGACAAGTCATTTAAAACAAACAAAACATTACCAAATAGAACAGTACACCATGGAATTAGTTCCAAGACTACTAATATAAACAGACCCAGTGTAAATAGAGGAGGTATAAATGAAGTTGCACAAAAAAACTTGCACAGGACAAATATAAGGAAACCCCATAGATACAGGCCAGGTGTATTAGCATTAAAAGAAATAAGAGCATATCAAGCATCGACTCAATTATTAATACCTAAAATTCCATTTGTTCGAGTAGTAAAAGAAATTACAAGATTATTTGAATTACCAGATGAGCAATTTCGTTATACACCTGAAGCATTATTAGCTTTACAAACAGCATCAGAA…	MVRTKKNIPNHNPLNAFNRDKSFKTNKTLPNRTVHHGISSKTTNINRPSVNRGGINEVAQKNLHRTNIRKPHRYRPGVLALKEIRAYQASTQLLIPKIPFVRVVKEITRLFELPDEQFRYTPEALLALQTASEAYLVSLFEDAYLCSLHANRVTLMPKDIHLARRIRGRD	170	0	null	no	GO_0000786	GO_0000775, GO_0034399, GO_0000786	GO_0000786,GO_0000775,GO_0034399,GO_0000786	0	0	0	0	0	0	0	0	0	0	0	1	1	0	0	0	0	0	0	0	0	0	0	0	0	0	0	0	0	0	0	0	0	0	0	0	0
1005	PF3D7_0517900	zinc finger protein, putative	null	ATGTCTAACCCTATAGGAACAGATATTAACATATTAGATAATAATTTGATCCAAATATTTAGAGACTCAGACGAATGGTTAACACTAGAATATTTTTTACAAGTTAATGCAAGAACGTCTAGAGTAAAGTTAGTACAAGCATGGCATATTTCTCCTGTGCAAGTTATAAATAAATTTCAAAAAAAAAACTCAGAAAAACTTGTTCTAAAAACTTTTATTGATACTTCAGCGTTAGATACAGATAATACCATTCAGGATATTTGTGCAAGGGGGTTTTGTATTTCTTCAAAGGGTTTAAAGTTGTCCATTGGGAACTTTAACATTCCTGGCTTCCCGCTCACTTCCTTAAATAAAAACAAAACGTTTAATCAATGTAATGAACTTACATACGAAAATGAC…	MSNPIGTDINILDNNLIQIFRDSDEWLTLEYFLQVNARTSRVKLVQAWHISPVQVINKFQKKNSEKLVLKTFIDTSALDTDNTIQDICARGFCISSKGLKLSIGNFNIPGFPLTSLNKNKTFNQCNELTYENDPQNSRKKKLRKIMEHSQNSLLSGERGIFEFLLCDVGVGLSLSVYEKDVSTYNRDVLPIEYDSIFIKKQKEESLDDALTIHYKNKENENHKHNNEYNNVNNNEINLALGGDIMPTYGVLPYYTFHHEYIIYDNSQILPRYLIQFECDPNDDEHFSLPLCDYCSDAPAILYCESDEVKLCEKCDTLIHSQNKIVKKHIRKALNEAQKISGKCKRHMTNDVNMFCTICHIPICNLCISSHVHTDLTTNQNFPYLKNSNNNQDTIISLNM…	560	0	null	no	GO_0005622	GO_0000781	GO_0005622,GO_0000781	0	0	0	0	0	0	0	0	0	0	0	0	0	0	0	0	0	0	0	1	0	0	0	0	0	0	0	0	0	0	0	0	0	0	0	0	0
4464	PF3D7_1359200	high mobility group protein B4, putative	HMGB4	ATGGACAGAAAGAAGCCCAAGGCACCACCATCTTCATATTTAATTTTCTGTAATTACGAGAGGGAAAACGCAAAGAATACTTTATTACAAAAATGTGACAAGGAAACAATTCGAATAACTGATATACAAAAAGAATTAAGTAACAAATGGAAAAATCTTCCAGAAGATGAGAGAAAGAAATATGAGGAACAAGCACAAATATTGAAATCAAAATATAACGAAGAATTATTAGAATGGAAAAATCATTCAAATGAATATATATCAGGAGATTTGGTTATAAACAATACAGCTAAATTTCCTGTGATGAAAATACAAAAAATTATGCAATTAAATGGAAACGTAAAAAAAGTTAATAATGAAGCTATTAATATATTTCAAAAAGCAGTGATGATGTTTTTA…	MDRKKPKAPPSSYLIFCNYERENAKNTLLQKCDKETIRITDIQKELSNKWKNLPEDERKKYEEQAQILKSKYNEELLEWKNHSNEYISGDLVINNTAKFPVMKIQKIMQLNGNVKKVNNEAINIFQKAVMMFLIELVNKTLEFKDEKNTARNITSFDILSCIQREGIKYKFLEDCIYLLKEERGQTFFDEEDVQEETLFDLCEEDKKEYNYDVEEKKISKLKKKVQGSNKIKDKAGINKNIYADITTFFKKI	252	0	null	no	GO_0005622	GO_0000785	GO_0005622,GO_0000785	0	0	0	0	0	0	0	0	0	0	0	0	0	0	0	0	0	0	0	1	0	0	0	0	0	0	0	0	0	0	0	0	0	0	0	0	0
561	PF3D7_0320900	histone H2A.Z	H2A.Z	ATGGAAGTTCCAGGAAAAGTAATTGGTGGTAAAGTTGGAGGAAAAGTTGGTGGAAAAGTACTTGGTCTTGGTAAAGGAGGAAAAGGAAAAACAGGTTCAGGTAAAACTAAAAAAGCTCCATTATCCCGTGCATCAAGAGCTGGATTACAATTTCCAGTAGGTAGAGTTCACAGAATGTTAAAGAGCAGAATATCTTCTGATGGAAGAGTAGGTTCCACAGCAGCAGTTTACGCCGCAGCCATTTTGGAATACTTAACAGCAGAAGTTTTAGAATTGGCAGGAAATGCAACAAAAGATTTAAAAGTTAAGAGAATTACCCCAAGACATTTACAATTAGCCATTAGAGGTGACGAAGAATTAGATACTCTTATTAAAGCAACAATTGCTGGTGGTGGTGTT…	MEVPGKVIGGKVGGKVGGKVLGLGKGGKGKTGSGKTKKAPLSRASRAGLQFPVGRVHRMLKSRISSDGRVGSTAAVYAAAILEYLTAEVLELAGNATKDLKVKRITPRHLQLAIRGDEELDTLIKATIAGGGVIPHIHKALMNKVPLPPTAQKKPKKN	158	0	null	no	GO_0000786, GO_0005634	GO_0000786	GO_0000786,GO_0005634,GO_0000786	0	0	0	0	0	0	0	0	0	0	0	0	1	0	0	0	0	0	0	0	1	0	0	0	0	0	0	0	0	0	0	0	0	0	0	0	0
2914	PF3D7_1105000	histone H4	H4	ATGTCAGGAAGAGGTAAGGGAGGTAAAGGTTTGGGAAAAGGAGGAGCTAAGAGACACAGAAAAATTTTAAGAGATAACATTCAAGGTATTACAAAACCAGCCATCAGACGTTTAGCAAGAAGAGGTGGTGTTAAACGTATTTCTGGTTTAATATATGAAGAAATCAGAGGAGTTTTAAAAGTTTTCTTAGAAAACGTAATTAAAGATTCCATCATGTATACTGAACACGCTAAAAGAAAAACCGTCACTGCTATGGATATTGTATACTCCTTAAAAAGACAAGGAAGAACTTTATATGGTTTTGGAGGTTAA	MSGRGKGGKGLGKGGAKRHRKILRDNIQGITKPAIRRLARRGGVKRISGLIYEEIRGVLKVFLENVIKDSIMYTEHAKRKTVTAMDIVYSLKRQGRTLYGFGG	103	0	null	no	GO_0000786, GO_0005634	GO_0000786	GO_0000786,GO_0005634,GO_0000786	0	0	0	0	0	0	0	0	0	0	0	0	1	0	0	0	0	0	0	0	1	0	0	0	0	0	0	0	0	0	0	0	0	0	0	0	0
2915	PF3D7_1105100	histone H2B	H2B	ATGGTATCAAAAAAACCAGCTAAAGCTAAAAAAACCGGAACTGGTCCAGATGGAAAGAAAAAAAGAAAAAAGTCAAGATATGACAGCTATGGACTTTATATCTTCAAAGTTTTGAAACAAGTACACCCAGATACTGGTATTTCAAGAAAATCCATGAACATCATGAATTCATTCCTTGTTGATACTTTCGAAAAAATTGCAACTGAAGCTTCAAGATTATGCAAATATACAAGAAGAGATACCTTATCATCACGTGAAATTCAAACTGCCATAAGATTAGTTTTACCAGGAGAATTAGCTAAACACGCAGTTTCTGAAGGAACCAAAGCTGTAACAAAATTTACCTCCAAATAA	MVSKKPAKAKKTGTGPDGKKKRKKSRYDSYGLYIFKVLKQVHPDTGISRKSMNIMNSFLVDTFEKIATEASRLCKYTRRDTLSSREIQTAIRLVLPGELAKHAVSEGTKAVTKFTSK	117	0	null	no	GO_0000786, GO_0005634	GO_0000786	GO_0000786,GO_0005634,GO_0000786	0	0	0	0	0	0	0	0	0	0	0	0	1	0	0	0	0	0	0	0	1	0	0	0	0	0	0	0	0	0	0	0	0	0	0	0	0
1320	PF3D7_0617800	histone H2A	H2A	ATGTCAGCAAAAGGAAAAACTGGTAGAAAAAAAGCCTCAAAGGGAACTTCAAATTCTGCTAAAGCAGGACTTCAATTCCCAGTAGGAAGAATTGGAAGATATCTTAAAAAAGGAAAATACGCAAAAAGAGTAGGAGCAGGAGCACCTGTATACTTAGCAGCAGTTTTGGAATATTTATGTGCAGAAATTTTAGAATTAGCAGGAAATGCAGCAAGAGATAATAAAAAATCAAGAATTACCCCAAGGCACATACAATTAGCTGTTAGAAATGACGAAGAATTAAACAAATTCTTAGCAGGTGTCACCTTCGCTTCAGGAGGAGTATTACCAAATATTCACAATGTTTTATTACCAAAAAAATCACAACTTAAAGCTGGTACTGCCAATCAAGATTATTAA	MSAKGKTGRKKASKGTSNSAKAGLQFPVGRIGRYLKKGKYAKRVGAGAPVYLAAVLEYLCAEILELAGNAARDNKKSRITPRHIQLAVRNDEELNKFLAGVTFASGGVLPNIHNVLLPKKSQLKAGTANQDY	132	0	null	no	GO_0000786, GO_0005634	GO_0000786, GO_0005634	GO_0000786,GO_0005634,GO_0000786,GO_0005634	0	0	0	0	0	0	0	0	0	0	0	0	1	0	0	0	0	0	0	0	1	0	0	0	0	0	0	0	0	0	0	0	0	0	0	0	0
1245	PF3D7_0610400	histone H3	H3	ATGGCACGAACTAAACAAACAGCTAGAAAATCAACTGCTGGTAAAGCCCCAAGGAAGCAATTAGCTTCAAAAGCAGCAAGGAAATCAGCTCCAATCTCTGCTGGTATTAAAAAGCCACACAGATATAGACCAGGAACTGTAGCTTTAAGAGAAATTAGAAGATATCAAAAATCTACTGATCTTTTAATAAGAAAATTACCATTCCAAAGATTAGTAAGAGAAATTGCTCAAGATTATAAAACTGACTTAAGATTCCAATCTTCAGCAGTAATGGCCCTTCAAGAAGCTGCAGAAGCTTACTTAGTTGGTCTTTTTGAAGATACCAACTTATGTGCCATTCACGCAAAAAGAGTTACCATTATGCCAAAAGATATCCAATTAGCCAGACGTATTCGTGGA…	MARTKQTARKSTAGKAPRKQLASKAARKSAPISAGIKKPHRYRPGTVALREIRRYQKSTDLLIRKLPFQRLVREIAQDYKTDLRFQSSAVMALQEAAEAYLVGLFEDTNLCAIHAKRVTIMPKDIQLARRIRGERS	136	0	null	no	GO_0000786	GO_0000786, GO_0005634, GO_0020003	GO_0000786,GO_0000786,GO_0005634,GO_0020003	0	0	0	0	0	0	0	0	0	0	0	0	1	0	0	0	0	0	0	0	1	0	0	0	0	0	0	0	0	0	0	0	0	0	0	0	0
1321	PF3D7_0617900	histone H3 variant	H3.3	ATGGCAAGAACTAAACAAACAGCAAGAAAATCCACAGGAGGAAAGGCCCCAAGAAAACAACTCGCATCCAAGGCAGCAAGAAAATCAGCCCCAGTATCCACTGGAATTAAAAAGCCACATAGATATCGTCCAGGAACTGTTGCTTTAAGAGAAATTAGAAAATTCCAAAAATCTACTGATCTTTTAATTAGAAAATTACCATTCCAAAGATTAGTAAGAGAAATTGCACAAGAATATAAAACTGATTTAAGATTCCAATCTCAAGCAGTTTTAGCTTTACAAGAAGCAGCAGAAGCTTACTTAGTAGGACTTTTTGAAGATACTAACTTGTGTGCAATTCATGCTAAGAGAGTTACCATTATGCCAAAAGATATCCAATTGGCTAGACGTATCCGTGGA…	MARTKQTARKSTGGKAPRKQLASKAARKSAPVSTGIKKPHRYRPGTVALREIRKFQKSTDLLIRKLPFQRLVREIAQEYKTDLRFQSQAVLALQEAAEAYLVGLFEDTNLCAIHAKRVTIMPKDIQLARRIRGERS	136	0	null	no	GO_0000786	GO_0000791	GO_0000786,GO_0000791	0	0	0	0	0	0	0	0	0	0	0	0	1	0	0	0	0	0	0	0	0	0	0	0	0	0	0	0	0	0	0	0	0	0	0	0	0
1586	PF3D7_0714000	histone H2B variant	H2B.Z	ATGTCAGGAAAAGGACCAGCTCAAAAATCCCAAGCAGCCAAAAAAACTGCTGGAAAAACCTTAGGACCAAGACATAAAAGAAAAAGAAGAACTGAATCTTTTTCACTTTACATTTTCAAAGTCTTAAAACAAGTACATCCAGAAACAGGAGTAACCAAAAAAAGTATGAATATTATGAACTCCTTTATTAATGATATATTTGACAGATTAGTTACTGAAGCCACAAGACTTATTCGTTATAATAAAAAAAGAACTTTATCATCACGTGAAATTCAAACAGCTGTAAGATTATTATTACCAGGAGAATTATCAAAACACGCCGTTTCAGAAGGAACAAAAGCTGTAACCAAATATACAACAAGTGCTGCTTAA	MSGKGPAQKSQAAKKTAGKTLGPRHKRKRRTESFSLYIFKVLKQVHPETGVTKKSMNIMNSFINDIFDRLVTEATRLIRYNKKRTLSSREIQTAVRLLLPGELSKHAVSEGTKAVTKYTTSAA	123	0	null	no	GO_0000786, GO_0005634	GO_0000791, GO_0000786	GO_0000786,GO_0005634,GO_0000791,GO_0000786	0	0	0	0	0	0	0	0	0	0	0	0	1	0	0	0	0	0	0	0	1	0	0	0	0	0	0	0	0	0	0	0	0	0	0	0	0
1921	PF3D7_0816800	meiotic recombination protein DMC1, putative	DMC1	ATGGCTACATTACCTGCAAGTAAATCGGCTAGTAAAGTTGCTTTAACATCAGAAGTAGAGGATGAAGGGATAAAGGAACATACATTTCAAGAAATTGAAAAATTACAAGACTTAGGTATAAACGCTGCAGACATAAATAAATTGAAAGGAAGCGGTTATTGTACAATTCTTTCTTTAATTCAAACAACAAAAAAAGAGTTATGCAACGTTAAGGGTATATCTGAAGCGAAGGTTGACAAAATATTAGAGGTTGCTTCCAAGATCGAAAATTGTTCGAGCTTTATTACAGCTAATGAGTTGGTACAAAAAAGGAGTAAAGTGTTGAAGATAACAACAGGAAGTACAGTATTTGATCAAACACTAGGAGGTGGAATAGAAAGTATGTGTATCACAGAACTG…	MATLPASKSASKVALTSEVEDEGIKEHTFQEIEKLQDLGINAADINKLKGSGYCTILSLIQTTKKELCNVKGISEAKVDKILEVASKIENCSSFITANELVQKRSKVLKITTGSTVFDQTLGGGIESMCITELFGENRCGKTQVCHTLAVTAQLPKSLNGGNGKVCYIDTEGTFRPEKVCKIAERYGLDGEAVLDNILYARAFTHEHLYQLLAISAAKMCEEPFALLVVDSIISLFRVDFSGRGELSERQQKLNKTMSILSKLSEQFNIAILITNQVMSDPGATMTFIANPMKPVGGHVIGHASTIRLSLRKGKGDQRVCKVYDAPNLPEVECIFQLSDKGVIDATD	347	0	null	no	GO_0005634	GO_0000794	GO_0005634,GO_0000794	0	0	0	0	0	0	0	0	0	0	0	0	0	0	0	0	0	0	0	0	1	0	0	0	0	0	0	0	0	0	0	0	0	0	0	0	0
437	PF3D7_0308600	pre-mRNA-processing factor 19, putative	PRPF19	ATGTCAATAATATGCACCATAAGTGGCCAGACACCTGAAGAACCTGTTATAAGTAAAACGGGATATATTTTTGAGAAAAGATTAATTGAGAAACACATAATTAATTATGGTATATGTCCTGTAAGTGGTGAAGTTTTAACACTAGAAGATTTATATCCAATAAAAAATGAAAAGATAGTCAAACCTAGACCTATTACGGCTAGTAGTATTCCTGGATTATTATCCATTTTTCAAACCGAATGGGATTCGATTATATCAGAAATGTTTAGCCTAAGAACACATGTTAATGATATACGTAATGAATTAAGCCATAGCTTGTATCAATATGATGCTGCTACTAGGGTTATAGCTAAATTATTAAAAGAGAAAAATGGTTATAAAGAAGAAATAGAAAATTTA…	MSIICTISGQTPEEPVISKTGYIFEKRLIEKHIINYGICPVSGEVLTLEDLYPIKNEKIVKPRPITASSIPGLLSIFQTEWDSIISEMFSLRTHVNDIRNELSHSLYQYDAATRVIAKLLKEKNGYKEEIENLKKQIFQLKSSNDLDIYEIGLNEELLEKMQNVAKDLLINRKKRKIDNVCSVEQWKDFKNTNEFNIHSSTIPGVTCITLDVNKYKYNYNDDHMKHNFFSGGNDGNVYYVSLNDNKILSKLQGHLKKVNSIISHPSNFICITASNDKTIRIWKGDDNNVHHNDNGDSDSDNNNNNNDNDGSHLNNNEYIYDNYQFVSAHVITKHKDHVTSLALHPLENYFISSSKDSMWILHDLETAKTIKTSKDNPSSFKHLAIHPDGMMFGIAAQDS…	532	0	null	no	GO_0005874	GO_0000974, GO_0005634	GO_0005874,GO_0000974,GO_0005634	0	0	0	0	0	0	0	0	0	0	0	0	0	0	0	0	0	0	0	0	1	0	0	0	0	0	0	0	0	0	0	0	0	0	0	0	0
628	PF3D7_0403700	pre-mRNA-splicing factor CLF1, putative	CLF1	ATGAATTTTAATAGTAAGAAGTTACAGGTTAAGAATAAGAACGCCGCAGAGGTGCAGATTACGGCGGAGCAACTTATTAACGAGGCGTTAGAACTAGAAGAGGTTGAACATAAAGTAAATTACAATTTGATAGATGAAGAAGAGTTGAATGAATATAGAATAAATAAAAGAAAAGAATATGAGGATAAGATACGTAAAAGAAGATATATGATAAGTACGTACATAAAGTATGGATTATGGGAAATAAAACAGAAGGATATTGAAAGATGTCGTTCCATTTTTGAGAGGGCTTTAAATATTGATTATACAAATAAAAATTTATGGTTAAAATATATAGAAGTTGAATTGATTAATAAGAATATAAATAGTGCTAGGAATTTATTAGAAAGGGTTGTTTTA…	MNFNSKKLQVKNKNAAEVQITAEQLINEALELEEVEHKVNYNLIDEEELNEYRINKRKEYEDKIRKRRYMISTYIKYGLWEIKQKDIERCRSIFERALNIDYTNKNLWLKYIEVELINKNINSARNLLERVVLLLPLENIFWKKYAHLEEILNNYVNARNIYERWIKFKIDESSFLCYIYFEERCNEINKCREIFERLIVSIPKLECFYKFIKFEKKYKNIVRARAAYEKCIELLPSCYIDENFYIHFCNFEEEQNEYERCKKIYIEALKILPKNKSELLYKNFLQFQKKYANKDELHESLLIKERIFYEDELKKNKNDYDIWFNYIKLEESNINNINKEKCIIRIRDLYERAISIIPIISSKKFWKRYIYLWINYSIFEELYAQNIQRARDVYNNIIK…	780	0	null	no	GO_0005622	GO_0000974, GO_0071004	GO_0005622,GO_0000974,GO_0071004	0	0	0	0	0	0	0	0	0	0	0	0	0	0	0	0	0	0	0	1	0	0	0	0	0	0	0	0	0	0	0	0	0	0	0	0	0
3705	PF3D7_1235900	pre-mRNA-splicing factor SYF1, putative	XAB2	ATGGCTTTATTTGGAGAACTGTATGAGTGCGAAGAATTTTTTAACGAAGAGACATTTAACATAAAAGAAGGTGAATTTTATAATTATGATGATTATAGGGATTTAGAAGAATCGTTTGATTACTCAGCACACCCCGAGTATGTTGAATCTAACGATGTAACTTTAATAAATAAGAATAATGATGATTATGATGATGATAATAAGAGTTATATTAAAAATATTGAAATAGACATAAAAGAAAATTTTGATAAGATATCAACAAGATATTTATTTTTATATATTAATAAGTATAAAGAAATGTATATAAAAAATATGAAAGGATTATACGAGGTCCATTTTTATGATATACATTTGAAGGGTGATAAAAAATCAATCCTTGCAACTGATCATAATATTATA…	MALFGELYECEEFFNEETFNIKEGEFYNYDDYRDLEESFDYSAHPEYVESNDVTLINKNNDDYDDDNKSYIKNIEIDIKENFDKISTRYLFLYINKYKEMYIKNMKGLYEVHFYDIHLKGDKKSILATDHNIIEYCMENLMNINNNPDDNNNDTNNKSVHSSDNMHINKDERYNIYRDKKKKKKKKRVYDLFCIYAIILKYFPYSFKLWYHYIKDSIEMITDVYYRNKKNYKYINKIFDQCLLYMYNFKSIYIMYIQFLYIQRDVKKIRQIFNLSLQNVYLNQQNDLWECQLLFNEKINNKVINYEYIKRYVTIYPEQIIHLFKHYVKYKMYKNAMITFFYILNSEDNFDLGNFSKYDIYQEIYKLLNSKGSLNNDIIHLLRNNLYIFKNYESITSIYI…	1031	1	null	no	GO_0005622	GO_0000974, GO_0071004	GO_0005622,GO_0000974,GO_0071004	0	0	0	0	0	0	0	0	0	0	0	0	0	0	0	0	0	0	0	1	0	0	0	0	0	0	0	0	0	0	0	0	0	0	0	0	0
2402	PF3D7_0931800	proteasome subunit beta type-6, putative	null	ATGGATGTTGTTAATGAATCTCAAATAAAATGTCATGAAGAAAAATCTTGGGATGATGAATATGATATAAAAACACCCATATCAGACGGTACGACAATTATTGGTATAATTTATGATAACGGAGTTATGTTAGCTTGTGATAGTAGAACATCATCAGGTACATTTATTAGTAATAAATGTTCAAGAAAAATAAATCGTATAAATGAAAATTTATATGTTTGTCGAAGTGGAGCCTCAGCACATAGTCAGAAAATTATTGAAATCATAAAACATTATTGTGTATCTATGAAAAATGAAAACAGGAAAAAAGGTAGATTCCATGAAGGAGAAACAATTTATGATGAAACTACATATGATGAAGAAATAGATATTGATTCCATCAATTATTTAGATTATAAT…	MDVVNESQIKCHEEKSWDDEYDIKTPISDGTTIIGIIYDNGVMLACDSRTSSGTFISNKCSRKINRINENLYVCRSGASAHSQKIIEIIKHYCVSMKNENRKKGRFHEGETIYDETTYDEEIDIDSINYLDYNNNNDNNLVTKNKYFYEDKFNDYNPLVENVAHITKKIIYTNNNFLSCALIFGGYDKIKKQQLYAVNLNGSIIEKHDFAVSGSGSIYIQSYLQDKYKKFMTKKECFNLILNCVKYAMHNDNSSGGLIRIVNITKSFVEEFTVVNTQMNFQY	282	0	null	no	GO_0005839	GO_0005622	GO_0005839,GO_0005622	0	0	0	0	0	0	0	0	0	0	0	0	0	0	0	0	0	0	0	1	0	0	0	0	0	0	0	0	0	0	0	0	0	0	0	0	0
2903	PF3D7_1104000	phenylalanine--tRNA ligase beta subunit	null	ATGCCTACCATATCAGTGTATGAAGATGATTTATTCGAAAAGCTTGGGGAGGAAATTATAGAAGAGAAATTATTGGATGTTTGTTTTGATTTTGGTCTTGAGGTAGATGATATTGAATATAAGAATGATAAGAAAATATATAAAATCGAAGTACCAGCTAATAGATATGATTTAATATGTGTAGAAGGATTATGTCGTGCTTTAAAAAATTTCATGTGTAAATTTGATGATATAAAATATGATATATCAATGAATAATTATGATATATGTATAAAAGGAAATCAATATATTAAAGTAGATGGATCTGTTGATGATCGAAGAGGTTATGTTGTTTGTTGTGTTTTAAAGAATATGAATATAAATGATAGTGTATATAATAATATTATAGAGATACAAGAA…	MPTISVYEDDLFEKLGEEIIEEKLLDVCFDFGLEVDDIEYKNDKKIYKIEVPANRYDLICVEGLCRALKNFMCKFDDIKYDISMNNYDICIKGNQYIKVDGSVDDRRGYVVCCVLKNMNINDSVYNNIIEIQEKLHHNLGKKRSVLAIGIHDYDKIKFPLKYKFEKKEKINFIPLNEKTNLNGMNLIDFYSKNLNLKPYLKIIKDFDKYPIIVDSNEQILSLPPIINCDHTKISLNTKNVFIECTAIDRNKAQIALNILCSMLSEYCVPKYSIQSFVVIYENQDFSDDQNLKKKETQFLYPIFENKSLTCNIDYVRKLSGISHITVHEVNNLLKRMMLSCDIMDNNTFKVTIPFYRSDIMHCCDIIEDIAIAYGYGNIKYEPPQICKKHSLNNCSELFR…	623	0	null	no	GO_0005737	GO_0005622, GO_0009328	GO_0005737,GO_0005622,GO_0009328	0	0	0	0	0	0	0	0	0	0	0	0	0	0	0	0	0	0	0	1	0	0	0	0	0	0	0	0	0	0	0	0	1	0	0	0	0
3037	PF3D7_1117700	GTP-binding nuclear protein RAN/TC4	RAN	ATGGATTCACAAGAATATATTCCACAATATAAATTAATCTTAGTCGGTGATGGTGGTGTTGGCAAAACAACCTTTGTGAAAAGACACTTGACTGGAGAATTTGAAAAAAAATATATACCTACTCTTGGTGTGGAAGTTCACCCCTTAAAATTTCAAACAAACTTTGGAAAAACTCAATTTAACGTATGGGATACTGCAGGACAAGAAAAGTTTGGTGGTTTAAGAGATGGATATTATATAAAAAGTGATTGTGCTATAATTATGTTTGATGTATCTTCTCGTATTACTTACAAGAACGTTCCAAATTGGTATAGAGATATTACAAGAGTGTGTGAAACAATTCCTATGGTTTTAGTTGGAAACAAAGTTGATGTTAAAGACAGACAAGTAAAATCAAGG…	MDSQEYIPQYKLILVGDGGVGKTTFVKRHLTGEFEKKYIPTLGVEVHPLKFQTNFGKTQFNVWDTAGQEKFGGLRDGYYIKSDCAIIMFDVSSRITYKNVPNWYRDITRVCETIPMVLVGNKVDVKDRQVKSRQIQFHRKRNLQYYDLSARSNYNFEKPFLWLARRLSNQPNLVFVGEHAKAPEFQIDLNIVREAEKELEQAAAVAIDEEDIEN	214	0	null	no	GO_0005622, GO_0016020	GO_0005634	GO_0005622,GO_0016020,GO_0005634	0	0	0	0	0	0	0	0	0	0	0	0	0	0	0	0	0	0	0	1	1	0	0	0	0	0	0	0	0	0	0	0	0	0	0	0	0
529	PF3D7_0317700	CPSF (cleavage and polyadenylation specific factor), subunit A, putative	null	ATGAGCCCATATCATTTTTACAATAATGTAATAGATAGTAAATCTGTACGAAGTAGCGTATGTTGTAATATTAAAGGTAATGAAAAAAAGTATCTTATATATGCTTGTAATAATCATTTAAATGTATGTTGCATAGATAAGAATGGGAATACTGATGATTATAGTGAGCATGTATTATTTGCTGAAGTTTTAGAATTAAGGGAGTATGTCCCTGAAAAATTAGTTCATTCTACTTATAATAAAGAAAAAGTAAAGTCTTATTTATTTGTGTTAACAAGGAAGTATGTTTTATTATTATTAGAATATGATGTAAAAGAAAATGATTTTATAACATTATCAAAAATAAATTTGTGTGAATTGAATGGATTACATCTAGAAGAGGATGTTATATTTTTGCTT…	MSPYHFYNNVIDSKSVRSSVCCNIKGNEKKYLIYACNNHLNVCCIDKNGNTDDYSEHVLFAEVLELREYVPEKLVHSTYNKEKVKSYLFVLTRKYVLLLLEYDVKENDFITLSKINLCELNGLHLEEDVIFLLDERHKTILFYGYKNILKYIYLDYDNFLNLNNVYTMRIDESLIIDIAFLGTHTMGCNKQLRNKQDDDDKINYGDNKNNYGDNKNNYGDNNNNYGDYNNNYDDNRSNYDDDKSNYDDDKSNYDDDKSNYDDDKSNYDDDKSNYDDDNKYYDRVHKSGNFLCDDIYKNEMLFNKEDLFLEHQNIYKKIKKEMSTDDQDDVPLINKTLYSIGNKSCLEIDKLLKKKSYDFVGTMNYDNNDCRPNSINKLKVEERGKRNYDVRNCNNFDHI…	2870	0	null	no	GO_0005634	GO_0005634	GO_0005634,GO_0005634	0	0	0	0	0	0	0	0	0	0	0	0	0	0	0	0	0	0	0	0	1	0	0	0	0	0	0	0	0	0	0	0	0	0	0	0	0
1131	PF3D7_0530600	XAP-5 DNA binding protein, putative	null	ATGAATTTTCGAAAACCAGATAAAACAGCTGATTTAATCGATAGTATCATAAATAGTGAAAATGGGAAAGTTCAAAAATATGTTTTAGAAAGAAAAAGAAAGGAAAAAGAATTTCTAGAAAAAAAAGAAAATATAAAAAAAAAATCTATGATGGCTCCAAAATTAAATCAAATGTTTGTTAAAAATAAAAATGAAGATGATAAATTGATTAGCGAAACAATAGGTCTGAGAACTGTACATGAATATAAAAAAATTAAAGATGAAATATATAGTAACAAAAAAGATAATGATTTAAGAGAAAGGACACAAGATGATAAACATACCAAACAAAAAAACTTTAAATTGTCTTTTTTGTCAGAAGATGATGATAGTGATATTAATAAAAATGAAAGTGACGAT…	MNFRKPDKTADLIDSIINSENGKVQKYVLERKRKEKEFLEKKENIKKKSMMAPKLNQMFVKNKNEDDKLISETIGLRTVHEYKKIKDEIYSNKKDNDLRERTQDDKHTKQKNFKLSFLSEDDDSDINKNESDDNKNENDDNKNESDDNKNDGDSNKNDGDSNKNDGDSNKNDGDSNKNDGDSNKNDGDSNKNDGDSNKNDGDSNKNDGDGNKSDNDMLGQQNDLNNNKSYEKNENKKELSSNRNKNKLDNKNAFTNKIMKDPTVNTSFLKDKERDKKIELKKKELRELYYKLENEQKEKVIDITYSYYDGSGHRRKISVKQKNTIGQFINKCVDNLKNEFIQLRSASCETLMFVKEDVILPNYITFYELIKNKAQGKTGPLFSFDAVENLSGITDIRKE…	447	0	null	no	GO_0005634	GO_0005634	GO_0005634,GO_0005634	0	0	0	0	0	0	0	0	0	0	0	0	0	0	0	0	0	0	0	0	1	0	0	0	0	0	0	0	0	0	0	0	0	0	0	0	0
321	PF3D7_0218700	pre-mRNA-processing protein 45, putative	PRP45	ATGACTGATTTTTTAAGGAATATTCCTAAACCTAAAAAGAAGGCGTATGATGACGAAAACGAGTTGCATGATTTTAAAGAAAGTAATAACTCCATAAAAAAAAAAGAAGAAATAAAAAAAAAGAATCAATGCTATGAGTATTTAAAAAGAAGACATTTAAGAATTACATGTAATGAAGATTTCCAAGGGGGAGGAGCATATCCCGAAATTCATATGAATCAATATCCGAATAATATTGGATTAAAGAGCGATAATAAAAATAATATTGTTTTAAAATATATTGACGAGAATAACAACGTAAAATATGATAATTTAATTAATCAACAAATACATATATATAACAATGAAATAGATAAGATTGAACCTAATGAAAGAATAAATAAATTAAGAAAAAAAAAA…	MTDFLRNIPKPKKKAYDDENELHDFKESNNSIKKKEEIKKKNQCYEYLKRRHLRITCNEDFQGGGAYPEIHMNQYPNNIGLKSDNKNNIVLKYIDENNNVKYDNLINQQIHIYNNEIDKIEPNERINKLRKKKILSDTKDREEKYNEPTYKPNNDEENEIIENTKRNIENILNEKLNKSNIVNKKEEKYYRYIPQNKLNNNLEERIIKIVEKGTDPLDVSKFKHKKLPNIKNSPDYPILRSPTRKLNKEEENDWKIPPCVSNWKNNKGYNIPLDKRIQSDNKKLNNVVVNENFAHLSEYLYVAEKKAREEIQIRNSVMKQKKLKEKEEKENVLKNLAIQARKEKGLAHSSLINDRKREIEREYKIEKNLKKMKNYENRYVEEQIALNKVNVSKNNNIHD…	482	0	null	no	GO_0005681	GO_0005634	GO_0005681,GO_0005634	0	0	0	0	0	0	0	0	0	0	0	0	0	0	0	0	0	0	0	0	1	0	0	0	0	0	0	0	1	0	0	0	0	0	0	0	0
934	PF3D7_0510500	topoisomerase I	TopoI	ATGCAATCAATGGAAATAAATGATAATAACAGTATCAAGAATGAAAGTACATCTGATGATGATATATTAATTAATAAAATTAAACAAAACTTGGGTAATAATAAATCATGTAATTCTAGATCTTCCAAAAAGGAATCTATAAAAAAGCAAAAGAGCAATTCTGAACTTGGTATAAAAAAGAACACAAAGAAATCATTAGGTATAAAAAAAGAGGAAGAAAAAAAAAAACAAATAAGCAAAAGAAAAAGTAATGAACTAAAAGAAAAAAATAATTTGAAAGAGGGAAAAAAGAAATATGTGGAAAAAAAATCTAGAACAGTAAAAGATGAAACCAAGTTAACGAATGTTATAAAAAAAGAAACTCAAAATAATAAGAAACCTAAAAAATTACTTAAAAAA…	MQSMEINDNNSIKNESTSDDDILINKIKQNLGNNKSCNSRSSKKESIKKQKSNSELGIKKNTKKSLGIKKEEEKKKQISKRKSNELKEKNNLKEGKKKYVEKKSRTVKDETKLTNVIKKETQNNKKPKKLLKKSEENFEPINRWWEKIDDQTDIQWNYLEHRGLIFSPPYVQHHVPIFYKSIKIELNAKSEELATYWCSAIGSDYCTKEKFILNFFKTFINSLENDNIIKQENETKLKKGDISNFKFIDFMPIKDHLLKLREEKLNKTKEEKEEEKKMRMEKELPYTYALVDWIREKISSNKAEPPGLFRGRGEHPKQGLLKKRIFPEDVVINISKDAPVPRLYDNMCGHNWGDIYHDNKVTWLAYYKDSINDQIKYTFLSAQSKFKGYKDLMKYENAR…	839	0	null	no	GO_0005694	GO_0005634	GO_0005694,GO_0005634	0	0	0	0	0	0	0	0	0	0	0	0	0	0	0	0	0	0	0	0	1	0	0	0	0	0	0	0	0	0	1	0	0	0	0	0	0
2729	PF3D7_1026400	cell division cycle protein 20 homolog, putative	CDC20	ATGGATAATATTTTTATAAATTCACCTATTATAAAAGACTACTACAATATAAAGGATTTTTTTTTACATATAGATAATGAAATACACCTTACAGAATTACCTTTTCCTTGTGATTATAATACCTATGGACACTTTTGTTTATCGAATGAAGAGATAAATAAAATAATGTGTACAGAAGAGAATAGATTTGAGGAATATAATATAGAAAAAGAAAATGAAGACAAGATTACGAATTATATTTATCAAACTAGATATAGTAGATATAGTAAATATAACATAAAAATGGATGAATATACATTAAGAAGAAATGATTATGTTAAAGATAATAATGTATATTATAATCCAAATCATCATAAAACTAATAGTATAACAAATTATAAAAACGATGATATAAATAAA…	MDNIFINSPIIKDYYNIKDFFLHIDNEIHLTELPFPCDYNTYGHFCLSNEEINKIMCTEENRFEEYNIEKENEDKITNYIYQTRYSRYSKYNIKMDEYTLRRNDYVKDNNVYYNPNHHKTNSITNYKNDDINKKSDNNKYFDDDIFIFNMYKNMEERNIRKNINRYNLIKDDNNMYRNILFEHSHKNIMLREYDKTKNITFHPHGTYFLTYPFYILNNNKKEKRKIPNMPYRILSAPELMDDFYLNLLDWSKKNIIATALCDKLYLWNNNTCTNQKLFVANKIEKEIEQKDKGDDKKTEKKDKDKKEKRKSNNDKYYNHKCESMEILKPSEKKKNKPQKTISSLKWNINGNFLATGLSNGVVEIWDIEKCVRIRKYKNHKSRVNTLCWNHNTLTTGGRD…	603	0	null	no	GO_0005737	GO_0005634	GO_0005737,GO_0005634	0	0	0	0	0	0	0	0	0	0	0	0	0	0	0	0	0	0	0	0	1	0	0	0	0	0	0	0	0	0	0	0	1	0	0	0	0
3328	PF3D7_1147000	sporozoite and liver stage asparagine-rich protein	SLARP	ATGAGAAAAGGGAAACCAAGACATGTGCCTATGTTTTTAAGAAGCGAAAATAAAAGAATATTTTTTAGCTTTTTTTCTTATTTCATGCCAAAGAATGATTTGAATTTTATTTTTGAGCATTTCGATATCGGATTAATCGTACTAACTAAAATACATAATATACGAAAAAAGTATGAAGAGGAAAGAAATAATATGAAAAATGAAGAAGATAAATCCGATGGAGATGATATGAAAATATTTGATGAAAAATTAAAGAACTTTTTTTTAAATTATAAAATTAATCCTAACATTGAAGAATCTAATGATACCAAAATTTCTAAAAAGGAAAAGAACAATAATAATAAAAAAAAAAAAAGAAACTATCCATTAAATAATGAATGTAAACAAAATAATGTAAAT…	MRKGKPRHVPMFLRSENKRIFFSFFSYFMPKNDLNFIFEHFDIGLIVLTKIHNIRKKYEEERNNMKNEEDKSDGDDMKIFDEKLKNFFLNYKINPNIEESNDTKISKKEKNNNNKKKKRNYPLNNECKQNNVNKKVMNKSNSCPLNKKNEKKQDIIDDKKKNKLHDMNNERDCNINKEINNDIQKMYMYNNEQGKTHNLDIQSYMPYDQQKGKENQEPSLYKCDEILKMNSTTEDRNKKEDVSKGKKKKINNTPQSYNTPQSYNTPQSYNTPQSYNTTQNYNTTQNYNTTQNCNTTQNYNTTQNYNTTQHNNNINENNDDDKIIIDEENCLNTIKHNEREMNNNIQKTKSCEDNQYLINYNGNNEMSYNHKHLTLLDNKNEEQENAFILNNMNKTKNGI…	2940	0	null	no	GO_0005737, GO_0005622	GO_0005634	GO_0005737,GO_0005622,GO_0005634	0	0	0	0	0	0	0	0	0	0	0	0	0	0	0	0	0	0	0	1	1	0	0	0	0	0	0	0	0	0	0	0	1	0	0	0	0
4055	PF3D7_1317100	DNA replication licensing factor MCM4	MCM4	ATGGGTACACCAAGAAGAAGATTAGGACAACAAAATAACAATAATAATAGTCCCTTTGCATTGAGTTCTTCTAATATATTTGGGTCGAACAATGAGATATTTGGAAGTAATTTTATGCATACGCCTATGTCGAGTAGGAGGACAAAGAACAGTAAAAGTTTTTTAAATAGTATGTTGAATGAATCAAGATATTTAAATCAGAGTAATGCCGGTTCTCAATTTATAAAATATGGACATACCCCTTTAGCTATTAGAAGAATAAAGTGTGCAAGAGCTGATATTGGAGATGTTGGTAGAGAAGCTTTTATGGAAGATGTTGAATCAGGTCGTTTGCCTCATTTTATTGATAGTAATTTAGAACAAATAAAAGAATTATTTAATCAATTTTTTGATGAATTT…	MGTPRRRLGQQNNNNNSPFALSSSNIFGSNNEIFGSNFMHTPMSSRRTKNSKSFLNSMLNESRYLNQSNAGSQFIKYGHTPLAIRRIKCARADIGDVGREAFMEDVESGRLPHFIDSNLEQIKELFNQFFDEFNITNYSDVLDFTDEDRSISEYILLHRDNLKVYLAYYGWKMIKFIETGRQNECRLNNTNYEDDDENNENSEGIRNLEHIKSFEIDLTHIFFFNKKLYKLIIEYPSDCISEIDKIISTKYNSLLALVLEGDTRSSSSDKYPLSSTKQDYCRVRFFNKKHKDTPRKLGPNQIETLVCVKGVIIRCSNIIPEMTMAAFKCTSKKRIGVNNYEKCNEEVYEHVIQGEVQEPVTCSNCNNKNTFELWHNNCCFSSKQLIKLSEVTEHLKQGE…	1005	0	null	no	GO_0042555	GO_0005634	GO_0042555,GO_0005634	0	0	0	0	0	0	0	0	0	0	0	0	0	0	0	0	0	0	0	0	1	0	0	0	0	0	0	0	0	0	0	0	0	0	0	0	0
1878	PF3D7_0812400	karyopherin alpha	KARalpha	ATGGATAGGAGAATAGAAGCTAGAAGAAAAGAATTTAAAAAGAATTGTGATGACACAAGAAGGAAAAGAGAAGATTTGGTAGTTCAGATAAGAAAACAACAAAGAGAATGTCAATTAGAAAGTAAAAGAGCTATGGTAATGGCTAATATAGGATTTGAAGAGAATAATACATATAACCTTAATTACGCAAAAGGAAATCAAAATGATTCAACTAATGATTCCATTTATAACACTTCATCAAATAATAGTTCAAACACATTAGAAATGTTAAAGAAAATTCCCACATTAGCTATAGGTGTAAGATCTAATGAATATGTAACACAATTAAATAGTACGAGAGAATTAAGAAAATTATTATCTATAGAAAAAGGGCCACCAATACAAGAAGTTATAAATTCA…	MDRRIEARRKEFKKNCDDTRRKREDLVVQIRKQQRECQLESKRAMVMANIGFEENNTYNLNYAKGNQNDSTNDSIYNTSSNNSSNTLEMLKKIPTLAIGVRSNEYVTQLNSTRELRKLLSIEKGPPIQEVINSGVVPYIVEFLKYDDKTDLQFEAAWVITNIASGSQEQTKVVIDNNAVPHLVRLLSSEKEDVCEQAVWALGNIAGDSAECREYVLNQNSLPLLLKILRTSHKRTLIRNAAWTLSNLCRGKPAPKFEIVSKALPTLAALIYNDDEEILTDACWTLSYLSDGSNENINSVLDAGVAERVVELLSHCSFLVQTPALRTVGNIVTGDDLQTDVVVKLGAVQKLSCLLNSSKKSIKKEACWALSNITAGNISQIQAVIDNNVIPQLINILMKE…	545	0	null	no	GO_0005737, GO_0005634	GO_0005643, GO_0044613	GO_0005737,GO_0005634,GO_0005643,GO_0044613	0	0	0	0	0	0	0	0	0	0	0	0	0	0	0	0	0	0	0	0	1	0	0	0	0	0	0	0	0	0	0	0	1	0	0	0	0
2941	PF3D7_1107700	pescadillo homolog	PES	ATGCATATACACAAACTAAAGAAGAAAATTAAAAAGAAGAAGGAAGGGAAGTACCTAACAAAAAAACACATCCTAAGGAAATTATTTTTGAATGAAGAAGAATTTCGTAAGCTTTGTATTTTTAAAGGAATATATCCAAAAGATTTTAAAGAAATTCCTTTGAAATATCGAAAAAAATTTTATAAACATAAAGTGTTTTATACTAGAAATGATTTTTTAAAATTATCACATGAAAAAATAATTAATGATTTTAGAAAAATAAAAATATATTTAAAAAAATATAAAAAATGTAAATTAACCTTAGAAGATTTTACTCGTTCTAAAAATATTGTAGCAAACTTCCCTGTATATAAATTAGAACATATAATAAAAGAACGATATCCTATATTGTCATATGCT…	MHIHKLKKKIKKKKEGKYLTKKHILRKLFLNEEEFRKLCIFKGIYPKDFKEIPLKYRKKFYKHKVFYTRNDFLKLSHEKIINDFRKIKIYLKKYKKCKLTLEDFTRSKNIVANFPVYKLEHIIKERYPILSYAVDHLDDALSCIIAYSQLPSNHKYGIKNNMVKTCEMLKDHFHYYVYKTNRIKKAFISVKGYYLQAEILKKKVTWIIPHIFTPYLDTSIDFKLISDFIEYYIALLKFVLFKLYKLDNMLYPPKQDNDLKNEKLAHLSYDKDYSTNENNIDINMNQELQSKCNVNTNEDLNTCQEKTKEKNHKSDNNPHEHTTNIDNNNFNNIHLQDNCDLNKNEGKNLTNNIIHKNSEADNGHVHPDDHIDIDEHNKLKELFKNHIFYIHNDMPFDVL…	643	0	null	no	GO_0005730	GO_0005654	GO_0005730,GO_0005654	0	0	0	0	0	0	0	0	0	0	0	0	0	0	0	0	0	0	0	0	0	0	0	0	0	0	0	0	0	0	0	1	0	0	0	0	0
291	PF3D7_0215800	origin recognition complex subunit 5	ORC5	ATGTATAAAATAAAAAATAACGAGAGTGATATTAATTCCGATGATTGTAATGAAACAGCGCAGGAATGTATATATGGATTCAGTTCTCCAAAAAAGAGTAGAAAGGAATCACCAATTTTTGTGCAGAATAATGATGACACCTGTAGTAGTAACAATATTTATGAAAAGAAAACATGCAGTAATACTAGCGCAAGCAGTGTAAAAAAATATGACAAAAAAGAACAAAGCTTATGTTCTGATATAAATAATTACAACAAAGTGAATATTGAAGGATTAAAAATAAATGAAAGGAATTATGATAGGATAAATAATTCTGAAGAAGAAACAAACATTAACGATGATAATAATGATGATAATAATGGTGATTATGATGATGATAATAATAGTGATGATGATGAT…	MYKIKNNESDINSDDCNETAQECIYGFSSPKKSRKESPIFVQNNDDTCSSNNIYEKKTCSNTSASSVKKYDKKEQSLCSDINNYNKVNIEGLKINERNYDRINNSEEETNINDDNNDDNNGDYDDDNNSDDDDDNDDNNNNDDNNNDDDEDVDDFEDIKENDEYKDPTYSDIYKEAKKCNIRCENIMNSSVNKKNLEEINESDPLNSSDNSMTSSSEESCSEESDKESDKESDKDGNLYDEELNEIIEEGYFKELIPAIPHDILQAYISCLKICGFERQVQLHRLINLLGDLRDPISVIQILGLPGMGKTKVVKNFIKLTNVPFAYVNCLMAVYQSGRSAKNVIYHTILKDLSINLLNEFNEYKKINNITNYSYDPTKLVPNHVSNTDNFFSILHKLLS…	899	0	null	no	GO_0005634, GO_0000808	GO_0005656	GO_0005634,GO_0000808,GO_0005656	0	0	0	0	0	0	0	0	0	0	0	0	0	0	0	0	0	0	0	0	1	0	0	0	0	0	0	0	0	0	0	0	0	0	0	0	0
328	PF3D7_0219600	replication factor C subunit 1, putative	RFC1	ATGAGTTCGAAGGACAAAAACTTATTCAGCGATGACGAAAGCGATGATGGTAGGAAAAAGAAGAGGCTGAAAAAAGTATCTAGTTCCTTATTCCATGATGACGATGATGATAATTTTATAAGTAATAAAAAAGTGGAAAAATCCAAATCGAAAAAAAAAAGTGACGCTATATATATTGATGATAATGAAAGCAATAATAATAACAATTATAATAATACTAATAAAAGTAGTAATAGGAAATCATTAGAAAATAAATCATCGAAAACGTCACCGAAATTTTATGATATAACATCCTTTTTTAAACCCTCTTCAAAAAAACTTGAGGATAATAACACTATGAAGAAATCTAATAGTAAGGAAGATGAGAAACTCGTTGTGAATAATCTTAATGACTATTTT…	MSSKDKNLFSDDESDDGRKKKRLKKVSSSLFHDDDDDNFISNKKVEKSKSKKKSDAIYIDDNESNNNNNYNNTNKSSNRKSLENKSSKTSPKFYDITSFFKPSSKKLEDNNTMKKSNSKEDEKLVVNNLNDYFNILQNDNKVTKEDTKSNNVSPKNEINKSNVKRERESEQYEISSENDTVSSKKNVLISPAKKQKTQNNNNEDLQKFDYLPFHNQKFVITGVFKNFTRDELQSKIKEHGGSVMTAVSTKTNYLVHGEYLEDGRLFNEGRKYTKAFELQQQNKSNIKILNEEELLKLLPQTDQTQENDKTYASDTIKTENKDKNYNYEKKDKNYNYEKKDTHNTQNEILNQLWVEKYRPKNLNELVGNNQNVIKLQNWLASWEDVCIKGIKKPAQKTFR…	904	0	null	no	GO_0005663	GO_0005663	GO_0005663,GO_0005663	0	0	0	0	0	0	0	0	0	0	0	0	0	0	0	0	0	0	0	0	0	1	0	0	0	0	0	0	0	0	0	0	0	0	0	0	0
1511	PF3D7_0705300	origin recognition complex subunit 2, putative	ORC2	ATGCTGAAAAACTTTGAAGTAAATTCTCCTAAGAAATTGATAAGGAAAATAGAAGAAGAAACATATGAAGAAGACAAAGAAGAGTATTTAATTACGAATCTAACGGAAAATAAAAAAAACATGCCAAGTGTTATTATAAGAATCCCCAGAGATTTAAATAAATTTTTAAGTAATGAAGAAACTACCATAAAATATAATGAAAATATTAAATCATCAAATAATAAAATGAATAAAGAACAAAAATTAACCTCCTTTAAAATGGATAATAAATATGATATGAATTCCGAAGAAAAAATAAGTGCCATGGATAATATAGTTTTAGATAGTACGTATCAATCGGATTCAACACACGAAAGTATATCTTTCTTTAACAAAATCAAAGGACAAAATTATACAATC…	MLKNFEVNSPKKLIRKIEEETYEEDKEEYLITNLTENKKNMPSVIIRIPRDLNKFLSNEETTIKYNENIKSSNNKMNKEQKLTSFKMDNKYDMNSEEKISAMDNIVLDSTYQSDSTHESISFFNKIKGQNYTIDNINNENENNNSSSNGDSDDDSNDDSDNNSYDNSDYYTDDDKPIDESLLKSFKNKYVDVYESNVSNNEYITFIKNHTKNELEHFLQRRKLHHTNEMKVNDIINIDYDKLNEKNIIPYFLTNVFDMEQKKKREKMKLELEKKRKIMEEKRKTKTKVDDKAKTKNDTHINEKKKKKRNENNKVDTKKSVENFTKAANTQKIVKEGKMKTEDNDNSYDEYEDDNSYENKNRRNKKNKTNSNENQKINEDNEESYSDSYNDEFDKEDIDI…	825	0	null	no	GO_0005634, GO_0000808	GO_0005664	GO_0005634,GO_0000808,GO_0005664	0	0	0	0	0	0	0	0	0	0	0	0	0	0	0	0	0	0	0	0	1	0	0	0	0	0	0	0	0	0	0	0	0	0	0	0	0
4518	PF3D7_1364800	DNA-directed RNA polymerases I, II, and III subunit RPABC1, putative	RPB5	ATGGAAGATCCAGTAACGAGGTTTTATAAATGTCGAAAAACGTGTTGTGAAATGTTGGAGGATAGGGGTTATATTATGACTCCAAGAGAAAAGCTTGAAAACTTTTCAACTTTCAAAGAAATGTTTGAGGATAATGATAGACAACGATCTAAAATGGGTATTAGTACTACTCATAAAAATGATTCAAACAATAGAATTATAGTTTATTTTGCTGATGAAGTTAAAAAAACAGGGGTTAAACCACTAAGGGAATTAACCGAAAGGATGGAAGAAAAATCAATTCAGCGTGCTATTCTTGTAACACAAAATATATTAACCCCTTTTGCCAGAGATGCCATTAAGGAAGCAGCACCAAGACACATTATAGAAAACTTTTTGGATACTGAATTATTGGTTAAT…	MEDPVTRFYKCRKTCCEMLEDRGYIMTPREKLENFSTFKEMFEDNDRQRSKMGISTTHKNDSNNRIIVYFADEVKKTGVKPLRELTERMEEKSIQRAILVTQNILTPFARDAIKEAAPRHIIENFLDTELLVNITKHELVPRHIPLTSDEKKNLLQRYKIMENKLPRIQDVDPVCRYFGLSKGQVVKIIRPSETAGRYVTYRLVV	205	0	null	no	GO_0005634	GO_0005665	GO_0005634,GO_0005665	0	0	0	0	0	0	0	0	0	0	0	0	0	0	0	0	0	0	0	0	1	0	1	0	0	0	0	0	0	0	0	0	0	0	0	0	0
534	PF3D7_0318200	DNA-directed RNA polymerase II subunit RPB1	RPB1	ATGACGGTTGATTTGAATATTCCATATTCAGCATGTGAATTAAAGAGAGTAAAACGATTAGAGTTAGGTGTTTTGGATCCAGAAATAATAAAAAAGATAAGTGTTTGTGAAATAGTAAATGTAGATATATATAAAGATGGTTTTCCAAGAGAAGGTGGATTAAATGATATACGTATGGGTACTATTGATTATAGGACCTTATGTGGTACATGTAATATGAATGTAAAATATTGTCCTGGTCATTTTGGTCATATAGAATTAGCGAAACCTATGTATCATTATGGTTTTATGAATGTAGTATTAAATGTTTTAAGATGTGTATGTTATCATTGTGGTAGATTATTATGTAATGTGAACAGTTCTAAAGTTAAATATATTGAAAAGATTAAAGTAAATAGT…	MTVDLNIPYSACELKRVKRLELGVLDPEIIKKISVCEIVNVDIYKDGFPREGGLNDIRMGTIDYRTLCGTCNMNVKYCPGHFGHIELAKPMYHYGFMNVVLNVLRCVCYHCGRLLCNVNSSKVKYIEKIKVNSLRLRKLAELCLGIRACDHSVEEEGLNINDNSLNNFYNNDLSNLNMNQQMLLNKSNYTNIFEMVSKEDVDCGCVQPKYSREGPNMYIQFLHSSEEDIDESKRKLSAEEALEILKKIRKEEMSILGFNSDRCVPASLILTCIPIPPPCARPYVQYGNQRSEDDLTLKLLDIVKTNIQLKRQTDRGAKSHVLQDLCSLLQFHITTLFDNDIPGMPIATTRSKKPIKAIRTRLKGKEGRLRGNLMGKRVDFSARTVITGDPNLNIDYIGV…	2457	0	null	no	GO_0005665	GO_0005665	GO_0005665,GO_0005665	0	0	0	0	0	0	0	0	0	0	0	0	0	0	0	0	0	0	0	0	0	0	1	0	0	0	0	0	0	0	0	0	0	0	0	0	0
1048	PF3D7_0522200	transcription initiation factor TFIID subunit 10, putative	TAF10	ATGGATAAAAATTTTGTGAATGAACATGATGAACAATTAATAAAAACATTGCTTAAAAACAAGCCAATATTCAGTGAAGATTTGATTGATTTCTATCTTTCACAAAGTGGATGTCAAATTAACGAAAAATCATGCCTAAGATTAATATCATTAGTGTTACACAAATCATTAGATAATATAATTAATAAAACAATCAGTCTACAAGCCAATGAATCTTCAAATAATGAGGAAAACAAAAAGAGTTTCAAAAACGAATTAAATTATAAAGAATTGGTAGAGGCACTAAAACAACTTGATGATACGTATGAAAATGAAGAATTGTTTAAAAACTTCAATGTATTTTTAGAATAA	MDKNFVNEHDEQLIKTLLKNKPIFSEDLIDFYLSQSGCQINEKSCLRLISLVLHKSLDNIINKTISLQANESSNNEENKKSFKNELNYKELVEALKQLDDTYENEELFKNFNVFLE	116	0	null	no	GO_0005634	GO_0005669	GO_0005634,GO_0005669	0	0	0	0	0	0	0	0	0	0	0	0	0	0	0	0	0	0	0	0	1	0	0	0	1	0	0	0	0	0	0	0	0	0	0	0	0
2373	PF3D7_0929000	transcription initiation factor TFIID subunit 7, putative	TAF7	ATGGAAAAAAAAAAGAAGGAAAGTACCATAAAAATATCTCTTAATATAAATACGAAATTTAACGAATCTTATTTGGATGAGCAAAATGATATAATAAATGAGGCACTTATTAAGAACAATAACAAGGAAATTATACATTCCCTGAATCTTATTGAAAACATTCGACAGGGGACATTCGACTACAAGGATCTCAGAGAAGTTTATTTTATGAACGACAATGATTTGTTCAGCATGTTAAATGATAAGAAAGCCTCAGAAGAAAAAGGGAAAGGTAAAGAAGACGCACATAATAATAATAATATTGATAATAAGATATGTAATAATGATAAGGTAGGTGATAAAAATAAAAAGTTAAGTAATAATAATAATAATAATGGAAATGATTTAAATATACAGATT…	MEKKKKESTIKISLNINTKFNESYLDEQNDIINEALIKNNNKEIIHSLNLIENIRQGTFDYKDLREVYFMNDNDLFSMLNDKKASEEKGKGKEDAHNNNNIDNKICNNDKVGDKNKKLSNNNNNNGNDLNIQIEGDQNYNFNKNNETNIFVLDNDVDKVCIIRFPFSVSKDIKKYLLNKNLDMVIQPTTLLNSRFFLIHFKNINKKFHGILLELSTHIEIHKTLDRNNLYKSNDVSQMIYVYEHNTNSKELLKKFINNNFELCGGISKKLNHFIFQNHTKLFKYHDIYFAEKLIYEYLNTPYYDYFDLYVKTLNEMHNHIIMEKENNNKQNEIVDETTDLAAILGSLDNSYNIMNLIEKQDGDIDFEALLNYDIEKENYESDVSDLLLGGTYYLQKK	397	0	null	no	GO_0005669	GO_0005669	GO_0005669,GO_0005669	0	0	0	0	0	0	0	0	0	0	0	0	0	0	0	0	0	0	0	0	0	0	0	0	1	0	0	0	0	0	0	0	0	0	0	0	0
1343	PF3D7_0619900	splicing factor 3A subunit 2, putative	SF3A2	ATGGATTTTCAGAATCGTGTTGGACATAAAACAGGTAGTGGTATGCCACTATCAAGAGAAGATATAAATCAAGAGAGAAGAGAACGATTAAAACAGCTAGCTTTAGAAAATATTGATATTACTAAAGATCCATATATTTTAAAAAATAATGTTGGTATGTTTGAATGTAAATTGTGTTTAACTCTTCATAATAATGAGAGTTCTTATTTATGTCATACTCAAGGAAAAAAACATCAAATGAACCTTGCTCAAAGATTACTAAAAGAGAAAAATGAAATGACTACTAATAGATTAAATAAACCTGTAAGTGAACCAAGAAAAATAGTTAAAATAGGAAAACCAAGATATGATGTTACAAGAGTACGAAATAAAAAAAATCAACTTGGAATATTATTTGAA…	MDFQNRVGHKTGSGMPLSREDINQERRERLKQLALENIDITKDPYILKNNVGMFECKLCLTLHNNESSYLCHTQGKKHQMNLAQRLLKEKNEMTTNRLNKPVSEPRKIVKIGKPRYDVTRVRNKKNQLGILFELSFPNIKENTKPKFRFMSSFEQKIEAPDKKYQYLLFAAEPYETIAFKIPNIDIDENEGFYYKWFDKKKIFVMQIHFQNAFPPGHVNLREHSNFLSSTNRW	233	0	null	no	GO_0005634	GO_0005681	GO_0005634,GO_0005681	0	0	0	0	0	0	0	0	0	0	0	0	0	0	0	0	0	0	0	0	1	0	0	0	0	0	0	0	1	0	0	0	0	0	0	0	0
2329	PF3D7_0924700	splicing factor 3A subunit 3, putative	SF3A3	ATGTCACAATTTTTAATTGAACAGATTAGGTACTTACACGAAGAAATCGAAGTAATAGAAAAAGCAATTGCAGAATTGATCGATGAAAAAGTAAAAAACAAGAAGAAGAATATTTTATATGATTATGCTATAAATTATTTAGTTGAGAAAATCCAAGAGAAGTCTCAACTACTTTTAGAATATTATAACGATGAAGATAAATTAAAAAAAGAAGAAATGCTTTTTCTTTCAGGGAAAACGGGTGAAGATAAAAACGACATATGGAAAAATTATTATGAACGTGTAAAATATATAAGAGATTATCATAAAAAGACAAATATTAAAAAAATAGAAATAAAAAGTTCTAAATTATATAAATTAGAAGCATTAAAATGTAGTAAATATAAACAATCCTTTTCT…	MSQFLIEQIRYLHEEIEVIEKAIAELIDEKVKNKKKNILYDYAINYLVEKIQEKSQLLLEYYNDEDKLKKEEMLFLSGKTGEDKNDIWKNYYERVKYIRDYHKKTNIKKIEIKSSKLYKLEALKCSKYKQSFSPLEKKGKYVDLNKFYNDFINMKKIKEFRISMFKKKEMASSHNRKRKKTGDNNNNNNNNNNVTTANINEFKEMDYVTYLHNFTRFIYIPRYCKYRNEEYKSYVENLLNYMISFFEKINVLVDCKTTYKEYEDDFYNKFNNKEIKGWEKYTYDLDFYCNINNKLYASEGTYQSYLKCKNYDNDLKKYLNKKYTVEQLEEIKKNIEKEDMNLARCEYLIQLYANILNKIIQRTIQNIQRKQAYTIDEIQKKKYKEEEQEDEKKRKKEYH…	589	0	null	no	GO_0005634	GO_0005681	GO_0005634,GO_0005681	0	0	0	0	0	0	0	0	0	0	0	0	0	0	0	0	0	0	0	0	1	0	0	0	0	0	0	0	1	0	0	0	0	0	0	0	0
5190	PF3D7_1461600	splicing factor 3B subunit 2, putative	SF3B2	ATGGCTATAACAACTTCAGATGATATTGAAAAGCTGAAAGAATTAAGAAAATCTAATCCTACGAAAGCTAAAAATTTTTTAAAAAAACTAAAAAAGAAAAATGCCAAGAAGATAAAACAGAATAAAAAGAATAGTACATTGGATGAGATAGAAGAAAACACAAAAGAGGAGACAACAATTTTGAATGATGATACCTACGTAGAATATGTTGAAGAGGATATTGATGAAGCGTTATACGAAAACTTCGAAGACGTGTATAAAAAATTCAAACTTCATAGTAAGGATGGAATTGAAAATAAGGAATTTTCTGAACAAATACAGAAGTCTTACTTTGAAGACTCCGAATCAGATGATAATGATGAAGAAGATGAACATAGAAATAGTATGAAGTATAAGAAA…	MAITTSDDIEKLKELRKSNPTKAKNFLKKLKKKNAKKIKQNKKNSTLDEIEENTKEETTILNDDTYVEYVEEDIDEALYENFEDVYKKFKLHSKDGIENKEFSEQIQKSYFEDSESDDNDEEDEHRNSMKYKKNISKKTKKLLKRPSVMKLKEFAPKPELVEVWDTTSSDPYFYVWIKCLKNSIPVPQQWCQKRKYLHGKRGIEKIPYRLPPYIQDTKISEIRQAIKEKEEQKSLKQKMRDRVRPKLHTMDIDYQTLHDAFFKYATKPKLVKFAEVYYEGKEFELKKKKFRPGVISEKLRNALNIEPNEPLPWLINMQKYGLPPSFPYLKIPGLNVSSPNDPTSHMGKHIISKDENVDESGNIIYANFISQHVTDSNNNKYADDFLWGEMDDKYEDQEE…	677	0	null	no	GO_0005634	GO_0005681	GO_0005634,GO_0005681	0	0	0	0	0	0	0	0	0	0	0	0	0	0	0	0	0	0	0	0	1	0	0	0	0	0	0	0	1	0	0	0	0	0	0	0	0
5261	PF3D7_1468800	splicing factor U2AF large subunit, putative	U2AF2	ATGTGGAAAAAGCTTACTTCACTTAAAAATAGTAATTGCAAATCTGATGTAAGTAATATAGAAGAAAATGATAAAAAAAATGTAAAAAAAAGTGATACACAAAATGAAGATTCCGAAAAAAAAAGTACAGGAACTAGTAATGGTATGTTAAGTATTAAAAAAAAAGATACTAATGAAACTGATAAAACAGATGAATATAATTTAGATTCAAATAAAAAAAAAAAAAGCTTTTACCAAAAAAAAAAAACAAGTAATAAAGAAATTGAAGAACCAAAAGATATATTAAAAGATGATACCAAAGACGTTATTGTAGATGATGATACAAATATAAAAGAAAATGATAATCTTAAAAATGAGTTTATCTCCAGTAATAATAAAAAAAAAGAAAAATATGAAAAA…	MWKKLTSLKNSNCKSDVSNIEENDKKNVKKSDTQNEDSEKKSTGTSNGMLSIKKKDTNETDKTDEYNLDSNKKKKSFYQKKKTSNKEIEEPKDILKDDTKDVIVDDDTNIKENDNLKNEFISSNNKKKEKYEKDLECNEERIHNDKKMNHCHDKEQNEKENEDKESKQIDIKEVKNSIEKIKEKFGKNVDEKIRRNESLDKKKDAHSVKNKTGNRNSTSRSRSRNRNRSKDRYLNKRKTIEVHSNSEENKQEKRRTKSRERSIEYRKKSKDKWRDRSKEKSRQRSRDRSKERSRQRSRDRWRDRSRDRWGLDRRRSRYKDSRDRNKFSYHSRSISSDEEHYSKNKKRTKRRKSRHNIDKDSYSSSSNSTHRRRNRKSSSSNNTRKDDNNSIQKKRKKSK…	833	0	null	no	GO_0005634	GO_0005681	GO_0005634,GO_0005681	0	0	0	0	0	0	0	0	0	0	0	0	0	0	0	0	0	0	0	0	1	0	0	0	0	0	0	0	1	0	0	0	0	0	0	0	0
3662	PF3D7_1231500	mitosis protein dim1, putative	null	ATGTTATACCATTTACATAGCGGCTGGGACGTTGACCAAGCTATATTAAGCGAAGAAGAAAGATTAGTTTGTATTCGTTTTGGTCATGATTATGACCCAGATTGTATGAAAATGGATGAGTTATTATTTAAAGTAGTAGAAGACATAAAAAATTTTTGTGTTATTTATTTAGTAGATATTACAGAAGTTCCTGACTTTAATACTATGTATGAATTATATGATCCTGTTTCTGTTATGTTTTTTTATCGAAACAAACATATGATGATTGATCTAGGTACTGGAAATAATAATAAAATTAATTGGCCTATGAATAATAAACAAGAATTTATTGATATCGTAGAAACAATTTTTAGAGGTGCAAGAAAAGGAAGAGGTTTAGTTATATCCCCAAAAGATTAT…	MLYHLHSGWDVDQAILSEEERLVCIRFGHDYDPDCMKMDELLFKVVEDIKNFCVIYLVDITEVPDFNTMYELYDPVSVMFFYRNKHMMIDLGTGNNNKINWPMNNKQEFIDIVETIFRGARKGRGLVISPKDYSTKYKY	139	0	null	no	GO_0005681	GO_0005681	GO_0005681,GO_0005681	0	0	0	0	0	0	0	0	0	0	0	0	0	0	0	0	0	0	0	0	0	0	0	0	0	0	0	0	1	0	0	0	0	0	0	0	0
1667	PF3D7_0722500	pre-mRNA-splicing factor CWC15, putative	CWC15	ATGACGACAGCACATCGCCCAACGTGGTACAATGCCATAGGAGGTGATAATCAAGGAGGGAATCGAAAAGTTAGTCAGACGCTCAAAGTCTGCAGTCGAGATTTGCCAGGACACCTAAAAATGAAAACGAGAGATTTAAGTGACTATGTAGAAGATAAAAATATGATTAAAAACAATTTAATACAACTAGAAAATAAAAACAATAAAGAAACCAGTAAAGGTAATAAATTACTAGCCATAGAAAATATAAAAAAATTGACAAATCATGATTTCAAAAATCCCTTCCCAGAAGATGAAGATGATATTATTGGAGATGAGTGGAAAAAAAAATCTCACAAGAAAAATAAAAAAAAGAAAAAATTAAAAATGAAGAATAAAAGAAATGTTAAAAAGAGGAAA…	MTTAHRPTWYNAIGGDNQGGNRKVSQTLKVCSRDLPGHLKMKTRDLSDYVEDKNMIKNNLIQLENKNNKETSKGNKLLAIENIKKLTNHDFKNPFPEDEDDIIGDEWKKKSHKKNKKKKKLKMKNKRNVKKRKVKHDMSEDEMSHDMNDYNSSDNNSSDNNSSDNNSSDNNSSDYNSSDNNSSDDDESDEEEKELLRELENLKRERMEKLKKEKEEQELLKKKKNNVLTNNPLINLEDSSDNDEVSTKKRKWTDDAIFRNTCEKKEKKTPSYINDTVRSAFHKKFLFKYIH	291	0	null	no	GO_0005681	GO_0005684	GO_0005681,GO_0005684	0	0	0	0	0	0	0	0	0	0	0	0	0	0	0	0	0	0	0	0	0	0	0	0	0	0	0	0	1	0	0	0	0	0	0	0	0
1881	PF3D7_0812700	U1 small nuclear ribonucleoprotein C, putative	SNRPC	ATGCCAAAGTATTATTGTGAATATTGTGATATATATCTAACACACAGTTCACCTGTTGGGAGGCGTCAACATATACATGGGAGAAAACATATTAGTGCCAAGATAGAATATTTTCAAAATTTATTAAGAGAAGAAGGTATCACACCTCAAAATTTTTTAGGATTTTTAAATAATAGAAATATAAATAATCCATTAGGAAATCCTATGATGAATTATATGAATCCAAATATGTATATGAAGTATAATCCAATGAAAAGTTATCATTCATATTCGATGAGGAGTTCACATCCATATCGTTTAAATATACATAATAATAAATATTCAAGAGCTGGATATGTCCCACCAAGTCATCATAAATATTCTGTTAACCCAATGCACAATAATTACCATCAGGCACAT…	MPKYYCEYCDIYLTHSSPVGRRQHIHGRKHISAKIEYFQNLLREEGITPQNFLGFLNNRNINNPLGNPMMNYMNPNMYMKYNPMKSYHSYSMRSSHPYRLNIHNNKYSRAGYVPPSHHKYSVNPMHNNYHQAHNNYSYPNSINPSNQINYSNNYGSNNFNNSNEFNKNMNEKDNINNNDIHDNKVKTDENDPINNDNLNNTRNFSYEENHYSTDHKKPSFLNPENSKEHIESDIS	235	0	null	no	GO_0005634	GO_0005685	GO_0005634,GO_0005685	0	0	0	0	0	0	0	0	0	0	0	0	0	0	0	0	0	0	0	0	1	0	0	0	0	0	0	0	0	1	0	0	0	0	0	0	0
3129	PF3D7_1126900	small nuclear ribonucleoprotein F, putative	SNRPF	ATGTCAGTGGGTATTGCTCCTCTTAACCCTAAGCCATTTTTAAACAGTTTGGCTGGTAATCGAGTAATTATAAAATTAAAATGGGGAATGGAATATAAAGGTATATTGAAATCCTTTGACGGCTACATGAACATAAGACTAACAAACGCAGAAGAATGGATACATGGAGAATTCAAAGGAACGCTTGGTGAAATATTTTTAAGATGCAATAATATCTTATATATAAGGGAAGATAATGAAAAAACAAAAACGGACCTTTGA	MSVGIAPLNPKPFLNSLAGNRVIIKLKWGMEYKGILKSFDGYMNIRLTNAEEWIHGEFKGTLGEIFLRCNNILYIREDNEKTKTDL	86	0	null	no	GO_0005634, GO_0005732	GO_0005685, GO_0046540, GO_0005682	GO_0005634,GO_0005732,GO_0005685,GO_0046540,GO_0005682	0	0	0	0	0	0	0	0	0	0	0	0	0	0	0	0	0	0	0	0	1	0	0	0	0	0	0	0	0	1	0	0	0	0	0	0	0
1054	PF3D7_0522800	pre-mRNA-splicing factor BUD31, putative	BUD31	ATGCCACGTATAAGAACTATGAATTCAAGAAAGCCACCTGAAGGTTGGCATAAGGTTGAGTCCTTTTTAGAAGAAATGAATAAAAAAATGAGAAGTTTAGAAAATGAAGATACTTCTAAAAAAAGGAAAAATGAAATATTATGGCCAATTTTTCAAATAAACCATAAAACATCTCGTTACATATATGAATTATATTATAAAAGGAAAGAAATATCAAGAGAGCTATATGATTATTTAGTTCAAGAAAAGTACGTAGATGGGGCTTTAATTTCTAAATGGAGAAAGCAGGGATATGAAAATTTGTGCTGCTTAAAATGTATACAAGTATCAGACAGTAATTTTAGTAATACATGTATATGTAGGGTACCAAAAAGTGATTTAGGAAATAAGGTATTACAA…	MPRIRTMNSRKPPEGWHKVESFLEEMNKKMRSLENEDTSKKRKNEILWPIFQINHKTSRYIYELYYKRKEISRELYDYLVQEKYVDGALISKWRKQGYENLCCLKCIQVSDSNFSNTCICRVPKSDLGNKVLQCVNCGCRGCASGDN	147	0	null	no	GO_0005634	GO_0005686	GO_0005634,GO_0005686	0	0	0	0	0	0	0	0	0	0	0	0	0	0	0	0	0	0	0	0	1	0	0	0	0	0	0	0	0	0	0	0	0	0	0	0	0
3694	PF3D7_1234800	splicing factor 3B subunit 3, putative	SF3B3	ATGCCAGTGTTGTATCATCTAACATTACAGAAGCCTACAGCAATTACCAAGACGGTTTATGGTAATTTCTCTGGTCCTCGATTTCATGAAATTATTGTGGCTAAAGGACAAGTACTTGAGTTACTGAGATCAGATAAACAAGGGAAATTAAATGTGATAATTTCTAAAGATATCTTTGGTATTATAAGAAGTATATCTACTTTTCGATTAACAGGAAGTAATAAAGATTATATAGTTATAGGTAGCGATTCAGGAAGATTAGTAATATTAGAATATAATAATGAAAAGAATGATTTTGTTAGAGTACATTGTGAAACATATGGAAAGACAGGTATCAGACGAATAATCCCAGGGGAATATATTGCTGTTGATCCTAAAGGTAGAGCATTAATGATATGT…	MPVLYHLTLQKPTAITKTVYGNFSGPRFHEIIVAKGQVLELLRSDKQGKLNVIISKDIFGIIRSISTFRLTGSNKDYIVIGSDSGRLVILEYNNEKNDFVRVHCETYGKTGIRRIIPGEYIAVDPKGRALMICAVEKQKFVYILNRDNKENLTISSPLEAHKSHSICHDVVGLNVGFENPMFVSIEQNYESLDKQINEELENENDDEDKSDEERKDNNDIINDKNVKDNKDNDFSLDYAKKVLCFWELDLGLNHVIKKHILPIDITAHLLIPLPGGQQGPSGVLICCENFLVYKKVDHEDIYCAYPRRLEIGQDKNISIICWTMHRIKKFFFILIQSEYGDLYKIEVDHEDGIVKEIVCKYFDTVPIGNSISVLKSGSLFVAAEFGNHYFYQFSGIGDD…	1329	0	null	no	GO_0005634	GO_0005686	GO_0005634,GO_0005686	0	0	0	0	0	0	0	0	0	0	0	0	0	0	0	0	0	0	0	0	1	0	0	0	0	0	0	0	0	0	0	0	0	0	0	0	0
4026	PF3D7_1314200	telomerase reverse transcriptase	TERT	ATGAATAATGAACCTACAAATAATGATAAGAATTATTTAAAAAATATATTTAATTGTACTGATAAGAAAATAATATTATTTAAATCTTACTTAAAAAACAAATTAGATATTGATTCTTTTACTTTAGGTGAATATTGTTTTAAACATGATGAGAAGTTCCAGAGAAGTGTGTTATCAAATATCTTAAAAGAACAAATAATAAGTAAGAAGGATAAGAATAAATTACATTTAATAAATGAAATAATAATAGATACATCATTTTTTAAAGAGAATTATGATTTTCAATATTTTTTAGAAAATGTTTTATTATTAGAAGATTTAGTTTTAAAAAAGTTGGATAATAAATTAAATGATGAGGATTTTATATTTAAAGAAAATAAAAAAGTATCTATAAATAAT…	MNNEPTNNDKNYLKNIFNCTDKKIILFKSYLKNKLDIDSFTLGEYCFKHDEKFQRSVLSNILKEQIISKKDKNKLHLINEIIIDTSFFKENYDFQYFLENVLLLEDLVLKKLDNKLNDEDFIFKENKKVSINNWKECYSHIKKKLNIKGMDEKSKIYNNSILLFNSTKFSYDDINCCDSFYGLKVWDILFNYVSFDFLNYLLSNTLIFISDYFFINTNNNFKTYVKSSYFIKIAEIQLNYQDAQNIERNIFSKKKNLYYKNTKLVKLTYQKKSIKDSTTPNLTIQKKKKKKKKKKFSKNINTNEHINININNYIYNTLNQNNEVNQYNVNHLNMDKNITYKEKESQNYTINNNLLNDQLLYYNKTYQNNVNTHIYSNDNKTPIIANQCIDIHNRVSDPT…	2518	0	null	no	GO_0005694, GO_0000781	GO_0005730	GO_0005694,GO_0000781,GO_0005730	0	0	0	0	0	0	0	0	0	0	0	0	0	0	0	0	0	0	0	0	0	0	0	0	0	0	0	0	0	0	1	1	0	0	0	0	0
4449	PF3D7_1357700	U3 small nucleolar RNA-associated protein 21, putative	UTP21	ATGGGTGTAGAGAAAAATATTTCGATGCCACTAAAACTTAGTGAAGTGTTTTGTACTGATGAAAATAATATTAAAGAATACAATAAAGGGAAAAATAACAATATAGATATAATAGAAAATGTAGAAGACTATAAAGAAAAATCCAAGCAGATATTGAATAAATATAAAATTACTGAATTTAATAAAAAAATAAAAAGTGATCAAAATATATACGAAAAAAAAAATAAAAGTATAGACGATGAATATATAAATGATAATCGTGTAAATAATGGAAATATAAAAGAAGAACATCAAGATGAAAATATATATACTGAAAAAAACTATAAAAACATTATTCCATCCAAAGAAAGTAATTTATTAATAGCCAATGGAACTACAGGTATAATTGTACACAATGGT…	MGVEKNISMPLKLSEVFCTDENNIKEYNKGKNNNIDIIENVEDYKEKSKQILNKYKITEFNKKIKSDQNIYEKKNKSIDDEYINDNRVNNGNIKEEHQDENIYTEKNYKNIIPSKESNLLIANGTTGIIVHNGIMCLSMKGIQPFIITSVKNSFCVYDPHKLRKAFLSEYFLEDIKNLYSTNNFVYVIFKRQVYKINDNGNKKIFSDHHKYNIINILITSDYLLTYSTKEIIIWNDNNDRNDFTQSDTNSELSDNEEKKDEKHVKTDNNTKGNPNSINKNNYTNDNDRNLDNNKNDPSNNKRNVKNNNKKNNIQENMPKKSDYFYKSINLFDNSSDVEIKSVIHPEGYINKVIITTNENKIYLYNINKEKIIHEYKAINILCLNEEKYIKIITPTLKNE…	1218	0	null	no	GO_0032040	GO_0005730	GO_0032040,GO_0005730	0	0	0	0	0	0	0	0	0	0	0	0	0	0	0	0	0	0	0	0	0	0	0	0	0	0	0	0	0	0	0	1	0	0	0	0	0
2511	PF3D7_1005100	U3 small nucleolar RNA-associated protein 25, putative	UTP25	ATGGGAAAAAGAAACTTTAGAGGTAAAAAACGAGCAACTACACTGAATGAATTATACGAGCTCGAATTTGTAAAGAAAGAAAAAAAAAAATTAAGGAAATTAAATTTTGTTACCAATAAAAATAAACCAAACGATGAATCCATAATAAAGGATACAAAACATAAGGAATTTAATAAAAAGGAAAATAAAATTAATAAAATATTGTTAAAGGAATATGAAAAATTAAAAAAAGAAGAAGAAAAACCAAAGGGAAACCCTTACTATACATCAGATCACGATGAAGACCAAACAGATTTAGAAAATAAAAATGATCAAAATAAAAAATTAACAAACAAACAAAGTAATTATGAAACATTCTTAAATATTCTTCAAAAAAAAAAAAAGGAAATCTTCAATCAT…	MGKRNFRGKKRATTLNELYELEFVKKEKKKLRKLNFVTNKNKPNDESIIKDTKHKEFNKKENKINKILLKEYEKLKKEEEKPKGNPYYTSDHDEDQTDLENKNDQNKKLTNKQSNYETFLNILQKKKKEIFNHSLNEDIKSNHNDHHIISKKINKQNQTTTKDNIQQNDNVKKGLLKKTNDEIYMSFLVNNINKQSNDFNLLNDIYLNNSHDIHNNNNNTTSINHKNVNTHTQNIHNINKEEHDKNIPDRNYLNENIMNSNNIHTNNNKNCHNLSENDMNGNHFDANNNLNSHNLSENIMNGNNFDTNNSQNNLLYNYSKTYNCISIYDNYKNDSYKLCENKMDYYFSFCQNIDEAFMEQFWNNKKNRLRNTNEQKDNDKSNEYKNKTIEDIYVKSNLF…	1131	0	null	no	GO_0005634	GO_0005730, GO_0032040	GO_0005634,GO_0005730,GO_0032040	0	0	0	0	0	0	0	0	0	0	0	0	0	0	0	0	0	0	0	0	1	0	0	0	0	0	0	0	0	0	0	1	0	0	0	0	0
1937	PF3D7_0818400	rRNA-processing protein FCF1, putative	FCF1	ATGGGTAAGTTTAAGAAAACCCAGAAAATCGTAAAACTAAAACGAGTTATAAATCCAAACGATAAAAGGATTATACAGAATAATAAAATAAAACAAGCAGAAGAAGAGAAAAAAAAAAAAAAAAAAGAGAGTGAGAAGTTGAAACAAATAGAAGTAATAGATAGTAACTTATTTTTTAATTATAATGAAAATTTGTGTCCACCATATAATATAATCCTGGATACCAATTTTATAAATTCCAGTATACAATATAAAATTGACATAATAAAAGGATGTTCAGAGGTTTTACTAGCCAAATGTAATATTTTTGTAACAGATTGTGTAATAGGAGAAATGGAAAAGTTAGGACAAAGATATTCTCTAGGATTAAAATTAATAAAGGATCCTCGTTTTAAAAGA…	MGKFKKTQKIVKLKRVINPNDKRIIQNNKIKQAEEEKKKKKKESEKLKQIEVIDSNLFFNYNENLCPPYNIILDTNFINSSIQYKIDIIKGCSEVLLAKCNIFVTDCVIGEMEKLGQRYSLGLKLIKDPRFKRLTCNHKGTYADDCIVNRVTESRCYIIATNDRDLKIRLRKIPGVPILYAKNFKYKIERLPDNILIS	198	0	null	no	GO_0032040	GO_0005730, GO_0032040	GO_0032040,GO_0005730,GO_0032040	0	0	0	0	0	0	0	0	0	0	0	0	0	0	0	0	0	0	0	0	0	0	0	0	0	0	0	0	0	0	0	1	0	0	0	0	0
2591	PF3D7_1013100	U3 small nucleolar RNA-associated protein 13, putative	UTP13	ATGTCAATTATTAGCAATATAGAAATTGATATGAAATTTTTTGACTTTTACGAAGGAGACAAGAGTGTTTATTTCTGCAAAGAATACGAAGCGTTTTTATGTTTATGTGATGATAACTTATATTCTTTTAAGATAGATGAAGAAAAAAATTCCAAGTATTCAAGTTTATATGACATTTTATACCCAACGTGTATATTAGAATCTTCTGTAGATATAGATGATATAAAAGAGAATTATCAGAAAAAATATTTAAATAAACGTTGTATATCATTATTTAGTTCTATTAGGTATTATTATTATTGCGATAATAATGTATTTTTATCAACAGATGATAATAATATACATCATTATGTACTAGTATATAATAATAATAACATAAAAGGGAATGATACATATGAT…	MSIISNIEIDMKFFDFYEGDKSVYFCKEYEAFLCLCDDNLYSFKIDEEKNSKYSSLYDILYPTCILESSVDIDDIKENYQKKYLNKRCISLFSSIRYYYYCDNNVFLSTDDNNIHHYVLVYNNNNIKGNDTYDDDIKNGEGVNNNNRDIYLYERKEDIEGGGNGNAYSYSYNWIYLEKKKIWKSENIVVSCFYYKDYDDDDYKKLIVGYNNGLINVYNINTYKLKISYKIHNTRITNLKFYKNFIISSDVTKNIYIYDIIKRERIITCEDHMGGIIDLLFLEVPNGKNENKAQQNEVNKDGIMINEEDDYISNDESNNDSDIGIIDNNNNNNNNNNDKNDNHYNDEKKKLHEKNEEKLIGFISIGNDKIMNIWDLNILNSYNEEDMNNLISNNNLSKKK…	1220	0	null	no	GO_0032040	GO_0005730, GO_0032040	GO_0032040,GO_0005730,GO_0032040	0	0	0	0	0	0	0	0	0	0	0	0	0	0	0	0	0	0	0	0	0	0	0	0	0	0	0	0	0	0	0	1	0	0	0	0	0
386	PF3D7_0303300	DNA-directed RNA polymerases I, II, and III subunit RPABC2, putative	RPB6	ATGGATGGCTTTAATGATAATTACTTAAATGAGGATGAGGATTTTATGGGGGATGAATTTGGTCAAGGTATTGATAGTGATGATGGTGAGAATTATGAAAATGATATTGATATAATAACAGATCATCAAATAAAGAAAGACAATAAATCAGATTATGAAAATTCTGAGGCTAATGAAGATAATATTAGAATAACTAGTCCATATTTAACTAAATATGAGAAGGCTAGAATTATAGGTACTAGAGCTTTACAAATAAGTATGAACGCACCCTTAACCATACCTATAGAGACATCAAATGATATGATAAATAGTAAAAATGAGTATGATAATTATTTAAATAATGATCCTTTAGTTATAGCTGAAAAGGAATTATATAATAAATCCATTCCATTTATTTTA…	MDGFNDNYLNEDEDFMGDEFGQGIDSDDGENYENDIDIITDHQIKKDNKSDYENSEANEDNIRITSPYLTKYEKARIIGTRALQISMNAPLTIPIETSNDMINSKNEYDNYLNNDPLVIAEKELYNKSIPFILRRYLPNGSYEDWRLDELIID	153	0	null	no	GO_0005665, GO_0005634	GO_0005736, GO_0005665, GO_0005666	GO_0005665,GO_0005634,GO_0005736,GO_0005665,GO_0005666	0	0	0	0	0	0	0	0	0	0	0	0	0	0	0	0	0	0	0	0	1	0	1	1	0	0	0	0	0	0	0	0	0	0	0	0	0
4385	PF3D7_1351000	phosphatidylinositol transfer protein, putative	null	ATGAAAATTGTCGAATTTCGGCTTGCTATGCCTTTAACCATAGAAGAATATAAAGTATGTCAATTATATTTTGTAGCTAAAGCTTCATTAGAAGACGCAGAAAATAATATAAATAGTAATTGTGAAAAAGGTGATGAGAATAATGATTCAAAAAAAGGAATAGTAATATTAAAAAATGAAAGTTATATAAATGAGGATGGTACATGTGGTCAGTATACATATAAGAGAATAAATTTAATAAATAAGTTACCAAAGTGGCTATTAAATTTTATAGATCCTAAATATTGTATTATAGATGAAAAGTCATGGAATGCATATCCATATTTAAAAACAGTTTATGAGTCTAGTGGTTTTCCAAAAGCGAAGATTCAAGTTGAATCCGCACATTTTAATGGTTAT…	MKIVEFRLAMPLTIEEYKVCQLYFVAKASLEDAENNINSNCEKGDENNDSKKGIVILKNESYINEDGTCGQYTYKRINLINKLPKWLLNFIDPKYCIIDEKSWNAYPYLKTVYESSGFPKAKIQVESAHFNGYDTEENALNLSEEALSLRKVIYVDIVNDKISYKDYNESEDPSLFYSDKAKRGKLEKNWKENHSIIMTCYKVFTINIPYFGIFCSKLENWIISALRDNILKYHRKAFCWIDEWIDLTIDDIRNLERDVQKKLNKFWNDSQDENVTDDILDEENNNKNENVKDQYVIHHNNNEENNDTLSNDIIDSLTFKNNQKDDIQRNMSNGNNMMNNDKICNNNNNNNIYYNGNIHNNECTNKQNLSQGNDQGRKEISKDLPNGTYITSSLNMDND…	1860	2	null	no	GO_0005622	GO_0005737	GO_0005622,GO_0005737	0	0	0	0	0	0	0	0	0	0	0	0	0	0	0	0	0	0	0	1	0	0	0	0	0	0	0	0	0	0	0	0	1	0	0	0	0
3394	PF3D7_1203700	nucleosome assembly protein	NAPL	ATGGCAGCTAATGAAGGAAATCAACCAATTCCACCTGAAGAAGAAAAGGAAATATCATCACTTTTAGAGAGCATTAAAATTGACGATGATAAAATGACCGATTTGACTGAAGAACAAAAGGAAACGTTAAAGAAGTTGAAACTTTATCAGAAAGAGTACTACGATTACGAATCTAAATTTGAATATGAGTTATTTTTGTTAAGGCAGAAATATCACGATTTATATGGTCCTATTTATGACAAGAGAAGAGAAGCTTTAGTAGGTAATGGTGAAGCAAAGATTGGTACACCTAATTTGCCAGAGTTTTGGTTAAGAGCATTAAGGAATAATAACACAGTGAGTCATGTTATTGAAGATCATGATGAAGAGATATTAGTATATTTGAATGATATAAGATGT…	MAANEGNQPIPPEEEKEISSLLESIKIDDDKMTDLTEEQKETLKKLKLYQKEYYDYESKFEYELFLLRQKYHDLYGPIYDKRREALVGNGEAKIGTPNLPEFWLRALRNNNTVSHVIEDHDEEILVYLNDIRCDYIKKNKEKKEGFILSFYFATNPFFSNSVLTKTYHMKCVDCDNEPVLLHTEATVIDWYDNKNILKKNVVKKQHNKNSREVKTVQQTVNRDSFFHFFTSHKVPNSNVIKQLSKHEVAQLEMIIEGDYEVALTIKERIIPYAVDYYLGIIIESESNSIVSDVDSSYSSSENNSNYNSYESNNSAYNDENSNVDTNEYDDNEEEEEGAKSNEDPLTS	347	0	null	no	GO_0005634	GO_0005737	GO_0005634,GO_0005737	0	0	0	0	0	0	0	0	0	0	0	0	0	0	0	0	0	0	0	0	1	0	0	0	0	0	0	0	0	0	0	0	1	0	0	0	0
2946	PF3D7_1108200	D-tyrosyl-tRNA(Tyr) deacylase	DTD	ATGCGTGTTGTTATACAGAGAGTTAAAGGAGCTATTTTAAGTGTAAGAAAAGAAAATATTGGAGAAAATGAAAAAGAATTAGAAATTATTAGCGAAATAAAGAATGGGTTAATATGTTTTTTAGGTATTCATAAAAATGATACATGGGAAGATGCTTTATATATAATTAGAAAATGTTTAAATCTACGTTTATGGAATAATGATAACAAAACATGGGATAAAAATGTTAAAGATTTAAATTATGAGCTTTTAATTGTTTCACAATTTACCTTATTTGGTAATACAAAAAAAGGAAATAAACCAGATTTTCATTTAGCAAAGGAACCAAATGAAGCTTTAATTTTTTATAATAAAATAATAGACGAATTTAAAAAGCAGTATAATGACGATAAAATAAAA…	MRVVIQRVKGAILSVRKENIGENEKELEIISEIKNGLICFLGIHKNDTWEDALYIIRKCLNLRLWNNDNKTWDKNVKDLNYELLIVSQFTLFGNTKKGNKPDFHLAKEPNEALIFYNKIIDEFKKQYNDDKIKIGKFGNYMNIDVTNDGPVTIYIDTHDINLNK	164	0	null	no	GO_0005737	GO_0005737	GO_0005737,GO_0005737	0	0	0	0	0	0	0	0	0	0	0	0	0	0	0	0	0	0	0	0	0	0	0	0	0	0	0	0	0	0	0	0	1	0	0	0	0
3492	PF3D7_1213800	proline--tRNA ligase	PRS	ATGAATAATAATACAAATGGAGAAATCATTATCCCCCAAGAATATTTAGAAAAGTCCGAATGTTTGTTTAAAGAATTAAAAGAATTAAATATAAATTTTAAGGAAGTAAAACATGGCTTAGCTGCTACTATTAAAGATTTATTAGAAATGAATTTAGAGAATTCTACAAATATATTAAAGAATTTGTTTTTAAAAGATAAGAAGAAAAATTATTTTCTAATATGTACATTAAATAACAAAACTGTCGACTTAAAAAATTTATCAAATATTTTAAAAACAAACAACTTAAGATTTGTTGACGAAAACAATTTAAATAATATTCTTAATATCCAACCAGGTTGTTTAAGTCCTTTGGCTATTAAAAATGATAAAGAAAATATAGTAAAATTATATTTTGAT…	MNNNTNGEIIIPQEYLEKSECLFKELKELNINFKEVKHGLAATIKDLLEMNLENSTNILKNLFLKDKKKNYFLICTLNNKTVDLKNLSNILKTNNLRFVDENNLNNILNIQPGCLSPLAIKNDKENIVKLYFDEEIKNMQEVIIHPLHNYSSLYIKTQDVIKFCESFNHAPEYVQIKEDTTSKARVDKKEDVQEEMAKNEELQNNNNNNKNNSNSNNNNNNNNNHIKDTILKGKLLSNNEVEDNKSKDSNILGITSKKIENFSDWYTQVIVKSELIEYYDISGCYILRPAAYYIWECVQAFFNKEIKKLNVENSYFPLFVTKNKLEKEKNHIEGFSPEVAWVTKYGDSNLPEEIAIRPTSETIMYSVFPKWIRSYRDLPLKLNQWNTVVRWEFKQPTPF…	746	0	null	no	GO_0005737	GO_0005737	GO_0005737,GO_0005737	0	0	0	0	0	0	0	0	0	0	0	0	0	0	0	0	0	0	0	0	0	0	0	0	0	0	0	0	0	0	0	0	1	0	0	0	0
4424	PF3D7_1355100	DNA replication licensing factor MCM6	MCM6	ATGTCAGCTATATTTAATGAAAGTGAATTATCCGGACTAGATGCCCATAGTGCCTTTGGTAATAATGAAACTTCCAGTTTTCAAAAGAAGAAAAGGCGAATCGACGAAAATTCTCAAATGAGTGTAAATGATTTAGTTGATGATGGGGAAGAGGAAGAAGATGATGATGATGATGAAGAAGAACCATCATATGTTCAAGATCAAAATATGGCTAAAGTATTTGAGAAATTTTTAAAAACATTTTCTGAAAAAAAAAGTGAAGAAGATGATGATGATGGTGATAGTATTTGGAAAGATAGTTTAAATTTTGATTTTCCAAGTAATTTAGAAATAGCAAAAGATTCTCATTATGTACTATTATTATTTTCTATTCTTCAAAACTCTTATTCAAGAAATAAG…	MSAIFNESELSGLDAHSAFGNNETSSFQKKKRRIDENSQMSVNDLVDDGEEEEDDDDDEEEPSYVQDQNMAKVFEKFLKTFSEKKSEEDDDDGDSIWKDSLNFDFPSNLEIAKDSHYVLLLFSILQNSYSRNKVLIVDMKHVLMWEPTDKNRFDIGSQLYMYIKRHFLRILDIFEKKVQLLAESINPIKTKEVGKICLRFYNKKNPIHSLRSLRCEMLGEMISVRGQVTRTSDVRPELTLAAFKCNECGNIINGVKQQFRYTQPSKCPSASCSNMSDWSLVLEQSYFVDWQKIRLQEIAQESPPGSMPRNMDVILRNDIVDSVHAGDRIIVTGCLIVVPDIPTLMKPGDVPRSVARQLLKKNENSLVSQGLTGIKGVGVQDLNHKLCIYACQIEKLNSS…	929	0	null	no	GO_0042555, GO_0005634	GO_0005737	GO_0042555,GO_0005634,GO_0005737	0	0	0	0	0	0	0	0	0	0	0	0	0	0	0	0	0	0	0	0	1	0	0	0	0	0	0	0	0	0	0	0	1	0	0	0	0
2681	PF3D7_1021600	deoxyribose-phosphate aldolase, putative	DPA	ATGGCTAACTATGCAGAAACTTTTTCAGCATGGACAAGTATTTGCCTGACCGATCATACACTTTTAGGTGAAAATGACACAGAAGATGATATAAGAGAATTATGTGAGGAATCAGTTAAAACTTGTCCATTTGCAGCAGCTGTTTGCGTAAAGCCTGAATTTGTGAAATTTATAAACGACACAATAAAAAAAGAAATATGTCCATTTAAGCCGAAAGTTGCGTGTGTAATTAATTTTCCTCATGGAACTGATGTTGTTGAAAAAGTATTGGAAGATACAAAGAAGGTATTAGAGGACGGAGTTGATGAAATTGATTTAGTTATAAATTATAAAAAAGTTTTACAAAATGTTGAAGAAGGTTTAAAAGAAGCAACTGAATTAACAAAAAAAGTGAAAAAT…	MANYAETFSAWTSICLTDHTLLGENDTEDDIRELCEESVKTCPFAAAVCVKPEFVKFINDTIKKEICPFKPKVACVINFPHGTDVVEKVLEDTKKVLEDGVDEIDLVINYKKVLQNVEEGLKEATELTKKVKNLMKEKVLKVIIETGELKNDELIIKTTLAVLEGNADFVKTSSGKVPVNATPGAVKAIIEAMKQYVEKNPQKKDKIGLKVAGGVGDLNSASYYILLARRFLSALACHPNNFRIGSSSLVPKLRKIIAQNPAV	263	0	null	no	GO_0005737	GO_0005737, GO_0005622	GO_0005737,GO_0005737,GO_0005622	0	0	0	0	0	0	0	0	0	0	0	0	0	0	0	0	0	0	0	1	0	0	0	0	0	0	0	0	0	0	0	0	1	0	0	0	0
4033	PF3D7_1314900	general transcription factor IIH subunit 2	P44	ATGCAAAATCCTCAAAATAGTGAAAATAAAGTCATTTTTGTTGAAGATGTTGTAAGAGATTTTGACGAAAATGAAATATTTGAAGAGATAACTGGGAAATTTACATGGGAACAAGATGTTGAACGATCATGGAATTTGCTGGTAGAAAATAATGGTGTGCTACAACATGTTAGCCAAGAGAATAACGAAAATGAAAATAAGGAGAAATATAGAAAGAATCAAGGATCTTCCTTAAGGAAAGGAATATTCAGACACATAATCATACTATTTGACATGTCTAGTAGTATGAAAGAAAGGGATTTAAAACCAGATAGGATAAATGTAGCTTTAGAATGTGTGGAATCATTTTTAAAAAACTTTTTCTTCAAAAATCCTGTCGGACATGTTGGTGTAGTAGCT…	MQNPQNSENKVIFVEDVVRDFDENEIFEEITGKFTWEQDVERSWNLLVENNGVLQHVSQENNENENKEKYRKNQGSSLRKGIFRHIIILFDMSSSMKERDLKPDRINVALECVESFLKNFFFKNPVGHVGVVALKNSSAKLIQPFTSNVDDILNSILKERTAGLQGSPSLEEGLQIAHDLLIDMPLYGTKEVLIMYGSIRTCDKKNILNVLELLVKSNIYVNCISIAPEMHILKHICEKSNGFYKICSSKNSLMNEINNNAETPLWMQGMEPQLIHICFPTKKKISTQIMCSCHGKLNTDTYVCNFCNSYTCKIPSKCKVCGIHLISMHDLSHITNNLQGSPLFIEIKNEQGNYKVCSSCNQQLYNKIYQCTKCQHIFCLECDIFIHEELNQCPFCLIN…	401	0	null	no	GO_0000439	GO_0005737, GO_0005634	GO_0000439,GO_0005737,GO_0005634	0	0	0	0	0	0	0	0	0	1	0	0	0	0	0	0	0	0	0	0	1	0	0	0	0	0	0	0	0	0	0	0	1	0	0	0	0
2425	PF3D7_0934100	TFIIH basal transcription factor complex helicase XPD subunit	XPD	ATGGTGGTTTTTAACCTTGATGACGTTGAGATTTTTTTCCCGTACGATTATATTTATCCTGAACAATATGCATATATGAAATATTTAAAAAAAACGCTAGATAGCGAAGGACATTGTGTTTTAGAAATGCCGACAGGGACAGGAAAGACGGTGGCTATATTTTCGCTTATTACATCGTATCAATATCATAAGAAGGATGAAGGGAAATTTATTTTCTGTACTCGTACGGTTGCTGAAATGGAAAAGTCGCTAATAGAATTGAAGAAGGTAATTCAATACAGAATTAATGTAATGAAGCAGAGAAAGGTAGAAAAGTTAAAAAATGAAAAAGATGATGTAAATGATGTGATAAAAAATGACGATGTAAATGATGTGATAAAAAATGACGATGTAAATGAT…	MVVFNLDDVEIFFPYDYIYPEQYAYMKYLKKTLDSEGHCVLEMPTGTGKTVAIFSLITSYQYHKKDEGKFIFCTRTVAEMEKSLIELKKVIQYRINVMKQRKVEKLKNEKDDVNDVIKNDDVNDVIKNDDVNDVINNDDEEGANNSLDGSKENVKEYNKHDDHINNLKEFGENSEILAIGISARRCMCINDKVLLKHEREKIDEECRKLTATFIREKKYINNKIDNEIYHPNVDKISDFILRNRHHLDIEDYFDIYNSRNSLEEYDNIGLCGYYENYKKEFLYDLIKPGVYTIEDLKVLCKNYKNKENVNVPICPYFCAKKIIEISKVIILNYQYVIDPKVSKALFSWKDMNKNVHLKNKNDIIVFDEAHNIDSVCLEALSVNIDRNILNKASMNITKL…	1056	0	null	no	GO_0005634	GO_0005737, GO_0005634	GO_0005634,GO_0005737,GO_0005634	0	0	0	0	0	0	0	0	0	0	0	0	0	0	0	0	0	0	0	0	1	0	0	0	0	0	0	0	0	0	0	0	1	0	0	0	0
3046	PF3D7_1118600	histone acetyltransferase	MYST	ATGGTCCTGGGGGGAAAGAATGAAAACAAAGTGAACGTGATTAAAGGGGCTGGAAGTATAGGCAAGTATATTATGAAGGAAAATGGTAGTAAAATAAAAGAAGTGGGGGAATGGAATAACAGTAGTGAAAATGAAAATAGTGATAATAATAATAATGATAGAGAAGATAATATAAAGGAAAAGGTAGATAATAATAATAAGAATGATGATAATAATAATAATGATAGAGAAGATAATATAAAGGAAAAGGTAGATAATAATAATAATAATGATGATAATAATAATGATAATAATAATAATAATAAGAGTGATAATAATAATAATAAGAGTGATAATAATAATAATAAGAGTGATAATTATAATAATAAAATTGGCGATGTTAGCAATATTCCAAGCACG…	MVLGGKNENKVNVIKGAGSIGKYIMKENGSKIKEVGEWNNSSENENSDNNNNDREDNIKEKVDNNNKNDDNNNNDREDNIKEKVDNNNNNDDNNNDNNNNNKSDNNNNKSDNNNNKSDNYNNKIGDVSNIPSTNTSTVSNKIQGKGSVSYKSKEKTGDHSSNNKNTKGNNNKVRTSGKVINSLSKYSDSYALIFPNALPVKQVLWGLDPLNKVWRYCSIVYARPKNKVLNDTNFMFPLNMNKNEIINKVNNELNNNNSVSMSEGDYDYYVHWEKFDRRLDCWLAYENLRLLDKEPDDGLPLIKDNDNVSDHEHAGIDKEYLREHEENTKLKTINQIRFGKYLIDTWYFSPYPKEYQNIDILYICEFCLSFFKEYSELKRHIEKCEIRHPPGNEIYREEK…	608	0	null	no	GO_0005634	GO_0005737, GO_0005634	GO_0005634,GO_0005737,GO_0005634	0	0	0	0	0	0	0	0	0	0	0	0	0	0	0	0	0	0	0	0	1	0	0	0	0	0	0	0	0	0	0	0	1	0	0	0	0
4766	PF3D7_1417800	DNA replication licensing factor MCM2	MCM2	ATGGAGGATAAGAAAAAATTAGAAGAAGATTTAGAATCTAACAAGTATGATATTGATGAAGAAGATTTACTAGAAGATGAAGGAAGGTTAAATGAAGAAGAAAGACAAGCCGAGCTAGAAGGAGAAAGTTTATTTGAAGAAGATGAAGGATTTATTTTTGGAGCTGATGATGAAAAAAAAGAAATGCAAAAGTTACGAAATTTAGGATTAGATAATGATGATTATGATGATGATTTTATTGATGATGAATTAGATTATGAGGATAATTTAAAAGCAAGAAGAGCAGCAGAAAGACATATGCAGATGCAAAGAAAACAAGAGGGTAAATATGAAAAAAATAAATTTTGGAAAACATTAGAAGATCAATTAGAAGGTGATGATGAAGAAGAAGATATTTTT…	MEDKKKLEEDLESNKYDIDEEDLLEDEGRLNEEERQAELEGESLFEEDEGFIFGADDEKKEMQKLRNLGLDNDDYDDDFIDDELDYEDNLKARRAAERHMQMQRKQEGKYEKNKFWKTLEDQLEGDDEEEDIFDKVAEKVAKRRENLHLTAEETDIPDLSNLESAKICLSVNPKDVVFDERYQQAADTCFRYFLHKFSLKDSMGLNIDESNTELHEEEHMNSSHQYYIDKIEKMILNDKHTLIVSAKHLIQFHCENLVQWIEFKPEQILEVLHECLMVEAYRISPKLYKGRICKVVLRDWPYSTQLRNLRCTELNTLIKVTGVCIKRGYVLPKLRVMYLKCNSCDTTLSEVPIYFADGKKPVLPRRCPHCQSATFSVDRIKTAYTDYQKITLQESPCSV…	971	0	null	no	GO_0042555, GO_0005634	GO_0005737, GO_0005634	GO_0042555,GO_0005634,GO_0005737,GO_0005634	0	0	0	0	0	0	0	0	0	0	0	0	0	0	0	0	0	0	0	0	1	0	0	0	0	0	0	0	0	0	0	0	1	0	0	0	0
2574	PF3D7_1011400	proteasome subunit beta type-5	null	ATGGTAATAGCAAGTGATGAAAGCTTTATGAATGAAATTGATAATTTAATAAATGATGTGGAAGATGAAAGAATAGATAATGATGAATTAGAGTTTTGTGTAGCTCCAGTGAATGTACCAAGAAATTTTATAAAATATGCACAAACTCAAAATAAGAAATTATTTGATTTTCATAAAGGTACTACAACTTTAGCATTTAAATTTAAAGATGGGATAATAGTTGCAGTAGATTCCCGAGCATCTATGGGATCTTTTATATCTTCACAGAATGTTGAAAAGATTATTGAAATAAATAAAAATATATTAGGAACAATGGCAGGAGGAGCTGCTGATTGCTTATATTGGGAAAAATATTTAGGTAAAATAATAAAGATTTATGAATTAAGAAATAACGAAAAA…	MVIASDESFMNEIDNLINDVEDERIDNDELEFCVAPVNVPRNFIKYAQTQNKKLFDFHKGTTTLAFKFKDGIIVAVDSRASMGSFISSQNVEKIIEINKNILGTMAGGAADCLYWEKYLGKIIKIYELRNNEKISVRAASTILSNILYQYKGYGLCCGIILSGYDHTGFNMFYVDDSGKKVEGNLFSCGSGSTYAYSILDSAYDYNLNLDQAVELARNAIYHATFRDGGSGGKVRVFHIHKNGYDKIIEGEDVFDLHYHYTNPEQKDQYVM	271	0	null	no	GO_0005839	GO_0005737, GO_0005634, GO_0005839	GO_0005839,GO_0005737,GO_0005634,GO_0005839	0	0	0	0	0	0	0	0	0	0	0	0	0	0	0	0	0	0	0	0	1	0	0	0	0	0	0	0	0	0	0	0	1	0	0	0	0
2900	PF3D7_1103700	casein kinase II beta chain	CK2beta1	ATGGAAAATAGTGATTCGAATAAAGACCTTCAAGATTCCAAATCAGATAAAAGTACATCATGGGTAAAATGGTTTAATAATAGAGCATTAAGTAATTTTTTAGTAGAAGTAGATAATGAATATATTACAGATTCATTTAATTTATATGGATTAAAAACGGAGATCCCTAATTTTAATCATCTCTTATCAATAATAGCTGGGGATGCACCTGAAGATGATGACGATTCAAAAAATAGCTTTTCAAAAGATTGTATATGTTTATATTCATTAATACATGCAAGATTTATAACAACACCAAAAGGTTTATCATTAATGAAAGATAAATATATTAAAGGTGATTTTGGTACTTGTCCAAGAGTAAGTTGTGCTCAACATAATGTATTACCCATTGGTTTGTTT…	MENSDSNKDLQDSKSDKSTSWVKWFNNRALSNFLVEVDNEYITDSFNLYGLKTEIPNFNHLLSIIAGDAPEDDDDSKNSFSKDCICLYSLIHARFITTPKGLSLMKDKYIKGDFGTCPRVSCAQHNVLPIGLFDQMKIAKVHVYCPLCQEIYKIHEDEKVYLDGSFFGTSFPHILLQTYPYYATLKTPPYCSSKIFGFNVYHNFTRTEYKLAKGEFGIITRENFLKKNPKYFKKLRKEELQISET	245	0	null	no	GO_0005956	GO_0005737, GO_0005634, GO_0005956	GO_0005956,GO_0005737,GO_0005634,GO_0005956	0	0	0	0	0	0	0	0	0	0	0	0	0	0	0	0	0	0	0	0	1	0	0	0	0	0	0	0	0	0	0	0	1	0	0	0	0
4299	PF3D7_1342400	casein kinase II beta chain	CK2beta2	ATGGAGTTTGTTTCAAACGATGAAAGTGCAGATGACATAATCCAAGATGAAAGTAACGAAGGCGAAGTTGAATTAACAGATGCAGATTTTTATGACCTTACGGTTATTAATGATAAAATAGATGAAGAAATAATAGAAGATGATGAGGAAGAAGCTGATAATGATGATCAGGAAAACGATAATGTCCAAGAAGTATATAATATTGACGATGAAGATAATGATATACATAATGATAAACTTTTATTAGATCAACAAAGAGATAATGATGTAAATGAAGAAGAGGAAGAAGAAGAGGAAGAAGAAGAAGAAGAAGAGGAAGAAGAGGAAGAAGAAGAAGAAGAAGAAGAAGAAGAAGAAGAAGATGAAGACGATGATGATGATGACGATGATGATGACGAT…	MEFVSNDESADDIIQDESNEGEVELTDADFYDLTVINDKIDEEIIEDDEEEADNDDQENDNVQEVYNIDDEDNDIHNDKLLLDQQRDNDVNEEEEEEEEEEEEEEEEEEEEEEEEEEEEEDEDDDDDDDDDDDDDDDDDDDDYDDDDEYDEDDFNEATVSWIEWFCQLKQNLFLVEVDEDFIRDEFNLIGLQTKVPHFKKLLKIILDEDDDDDDDDDDDYDDEDDEINRDSEEMYKNKDMHEQNAACLYGLIHSRFILTSKGLALMREKYKSGIYGTCPSIYCENAKLLPTAISEIPKFLSPLLYCPRCCETYYPSKNSLLNQLDGCYFGTSFASFFALSFNIASDKKKVYYTPQICGFTINRNIRETLYMDVNKDNTESSEECQ	385	0	null	no	GO_0005956	GO_0005737, GO_0005634, GO_0005956	GO_0005956,GO_0005737,GO_0005634,GO_0005956	0	0	0	0	0	0	0	0	0	0	0	0	0	0	0	0	0	0	0	0	1	0	0	0	0	0	0	0	0	0	0	0	1	0	0	0	0
4496	PF3D7_1362400	calpain	Pcalp	ATGGGGTGTATAAATAGCAAAGTAAAAGAGAAAAGAAAAATAAAAAAAAGAAAAAAGGAAGAATGTAATTTAATAGAAAATGTTGAAGGGAATAATGTGGGTAATAAGAATGTATCAAGTTATGTGATGAAAGAAAAAAAAAATAATGAAAAGGATGATGAAAATAATAATATTGACTGTAATAATAATGATAATAATAATGATAATAATAATGATAATAATATGAATTGTAAGAATCATTATATTTATAACGATAATAATTTGGTGAAGAACAATATTGACAATTCCAAAGAAAGGTTTTATTACAAAAAAAATATATTCAAGAATATTTCGAATAAGTGTAGTGATAAAAAATTACTTACAAGCAGCGATAAGGAGAATATTACTTATGTAATAAAA…	MGCINSKVKEKRKIKKRKKEECNLIENVEGNNVGNKNVSSYVMKEKKNNEKDDENNNIDCNNNDNNNDNNNDNNMNCKNHYIYNDNNLVKNNIDNSKERFYYKKNIFKNISNKCSDKKLLTSSDKENITYVIKSSTNNKSIINNNNDNNNNNNLFLFKDNNENKSNKSYYYNEVYTNIEPNKYDICKSRSMDLENVKINCNLIEDKKYKIKNYENKKRNDKLLKNSFTNIIHTISNTLLNRRSYRKNKYKKQKKVQSAHDVFTSYRNNKDDNIFDHHFKHYEDENDLYMLYLKNNYKNKKDQQKLFSNMRKNKDLLMYYHDFKNIILKRNSFLYIYEYYKYNCDVFNLLSLMPSHISENKKASKILFESSFIGKYIILPWIDNDPDIKNNLYLKYVQNY…	2048	0	null	no	GO_0005622	GO_0005737, GO_0005730	GO_0005622,GO_0005737,GO_0005730	0	0	0	0	0	0	0	0	0	0	0	0	0	0	0	0	0	0	0	1	0	0	0	0	0	0	0	0	0	0	0	1	1	0	0	0	0
2618	PF3D7_1015600	heat shock protein 60	HSP60	ATGATATCAACATTACGAGGGAAAATTTTTAATAACGGCAGTAATAGAAACAAGTGTGTTTCAATTTTAAGTAATATTCAGAAGAGAAACATATCAAAAGATATAAGATTTGGAAGTGATGCAAGGACTGCTATGCTTACAGGTTGCAATAAGTTGGCCGACGCGGTTAGTGTAACGCTTGGTCCAAAAGGAAGAAATGTTATCATAGAACAGTCATTTGGTTCACCCAAAATAACAAAGGATGGTGTAACAGTTGCTAAGAGCATTGAATTTAACAACAAGCTAGCTAATCTTGGTGCACAAATGGTAAAACAAGTTGCTGCAAATACCAATGATAAAGCAGGTGATGGTACAACAACAGCTACAATTTTAGCTAGATCAATATTTCAACAGGGTTGT…	MISTLRGKIFNNGSNRNKCVSILSNIQKRNISKDIRFGSDARTAMLTGCNKLADAVSVTLGPKGRNVIIEQSFGSPKITKDGVTVAKSIEFNNKLANLGAQMVKQVAANTNDKAGDGTTTATILARSIFQQGCKAVDSGMNPMDLLRGINKGVEKVLEYLNSIKKDVTTTEEIFNVASISANGDKNIGQLIADTMKKVGKEGTITVTEGKTLQHELEIVEGIKFDRGYISPYFINNSKDQKVELDKPYILIHEKKISTVKSLLPVLEHVLQNQSSLLVIAEDVDSDALATLIVNKLRLGLKICAVKAPGFGEHRKALIHDIAVMTGAKVITEETGLKLDDPQVVSYLGKAKSINVTKDSTLIMEGEGKKEEINERCESIRNAIKMNTSDYEKEKLQERL…	580	0	null	no	GO_0005737	GO_0005737, GO_0005739	GO_0005737,GO_0005737,GO_0005739	0	0	0	0	0	0	0	0	0	0	0	0	0	0	0	0	0	0	0	0	0	0	0	0	0	0	0	0	0	0	0	0	1	1	0	0	0
3389	PF3D7_1203200	signal recognition particle subunit SRP14	SRP14	ATGGTTTTATTAAGTAACGATGTATTTATTCAAGAACTTAATAAATTATGTGGACCTGTAGAAGGTAAAAAGAAAACATCCATATGGATAACTATGAAAAGAGTTAAAAGAAACGATATAAAAACTTTGACGAGCAACAAAGACGCCGGTGATAAAAAGAATACCAAAAAAGTAAATAAAAACGATAACAAAGGAAATAAGGAATATATGTGCTTAATAAGAGCTACCGATGGTAAAAACAAAAAAATATCTACACACGTTTATGATAATGTAATATCTTTTACTCAAAATATTAACAGCATTATAAAGTGTTAA	MVLLSNDVFIQELNKLCGPVEGKKKTSIWITMKRVKRNDIKTLTSNKDAGDKKNTKKVNKNDNKGNKEYMCLIRATDGKNKKISTHVYDNVISFTQNINSIIKC	104	0	null	no	GO_0048500, GO_0005786	GO_0005737, GO_0005789, GO_0005634	GO_0048500,GO_0005786,GO_0005737,GO_0005789,GO_0005634	0	0	0	0	0	0	0	0	0	0	0	0	0	0	0	0	0	0	0	0	1	0	0	0	0	0	0	0	0	0	0	0	1	0	0	0	0
1727	PF3D7_0729000	signal recognition particle subunit SRP9	SRP9	ATGGTTTATGCAGAGTCGTGGAATGATTTCATTCATACCACAAGGAATATTATTTCAAAATCTCCAGATAAAACAAGATATGTCATAAAATTACATAGACCTAGTGAAACAATTATAGTAAAAGTTACGGATAATAATAATAGTATTATGTACAAGTTAGATAAGAATGATAATATGAAAAAAATCGAAGAATTAAATTCTCTTTTCTTAATGTGGGGAACTAGTGAAAACCCAAACGAACCATTTCCTCTTAAAATGAACAAAATCACTGATAAAGGAACTATAGACCAAAAAATGAAAAAAACTAAATAA	MVYAESWNDFIHTTRNIISKSPDKTRYVIKLHRPSETIIVKVTDNNNSIMYKLDKNDNMKKIEELNSLFLMWGTSENPNEPFPLKMNKITDKGTIDQKMKKTK	103	0	null	no	GO_0048500	GO_0005737, GO_0005789, GO_0005634, GO_0005786	GO_0048500,GO_0005737,GO_0005789,GO_0005634,GO_0005786	0	0	0	0	0	0	0	0	0	0	0	0	0	0	0	0	0	0	0	0	1	0	0	0	0	0	0	0	0	0	0	0	1	0	0	0	0
3517	PF3D7_1216300	signal recognition particle subunit SRP19	SRP19	ATGGTTAAAGAACAAGGGTTAAATATCACCAATGTTTATAATAGAGATATTTATAATAATGCTGAAAATAATACAATTGATGAAAGTAAAGATTATTCAAGATGGAAAATAATATATCCAAATTATCTTAATAAAAAAAAAAAAGTAAATGAAGGAAGACGAATTAATTTAAAATATTGTGTAAGCGATCCAACCGTTGATGAAATTGCACTTGCTTGTAAAGAATTAAATGTTTCTTATGTTATAGAGAAAAAGAAATATTATCCAAGGGATTGGTTAATAGAAGGAAGAATAAGGATCAAATTACCAAATCAAAATAACGATATTCTAAATAAATTTGAATTAATGAAAAAAATTGGGTTGAAATTACAAACTATAAAGGTAAATGTGGAATCAAAT…	MVKEQGLNITNVYNRDIYNNAENNTIDESKDYSRWKIIYPNYLNKKKKVNEGRRINLKYCVSDPTVDEIALACKELNVSYVIEKKKYYPRDWLIEGRIRIKLPNQNNDILNKFELMKKIGLKLQTIKVNVESNVVINTNNLSKKKKKKKNKE	152	0	null	no	GO_0048500	GO_0005737, GO_0005789, GO_0005634, GO_0005786	GO_0048500,GO_0005737,GO_0005789,GO_0005634,GO_0005786	0	0	0	0	0	0	0	0	0	0	0	0	0	0	0	0	0	0	0	0	1	0	0	0	0	0	0	0	0	0	0	0	1	0	0	0	0
2270	PF3D7_0919000	nucleosome assembly protein	NAPS	ATGAAGAGAGATCGTTCAGAAAACTCTGTTGAAAATACAGACCCCAAGCATACCAAAATTGAAAATGATGATCCTTTGATGCCTTTCATGCAAGATTTTGAAGACATCCAAAAAGATATTGAACAGCTAGATATAAAATGTGCCCATGAACAAATGAACATCCAGAAACAATATGATGAAAAGAAAAAACCCTTGTTTGAAAAAAGAGATGAGATTATTCAGAAAATTCCAGGTTTTTGGGCTAATACATTAAGGAAGCATCCAGCATTAAGTGATATAGTACCAGAAGATATTGATATATTAAATCACTTGGTAAAATTAGATTTAAAGGATAATATGGATAATAACGGTTCATATAAAATAACATTTATATTTGGTGAGAAGGCTAAAGAATTTATG…	MKRDRSENSVENTDPKHTKIENDDPLMPFMQDFEDIQKDIEQLDIKCAHEQMNIQKQYDEKKKPLFEKRDEIIQKIPGFWANTLRKHPALSDIVPEDIDILNHLVKLDLKDNMDNNGSYKITFIFGEKAKEFMEPLTLVKHVTFDNNQEKVVECTRIKWKEGKNPIAAVTHNRSDLDNEIPKWSIFEWFTTDELQDKPDVGELIRREIWHNPLSYYLGLEEFDEFDDDFDEEFDDDDDDDDDDDDDDDDDDKDDDLDGDDDGNNDDNDD	269	0	null	no	GO_0005634	GO_0005737, GO_0034399, GO_0005634	GO_0005634,GO_0005737,GO_0034399,GO_0005634	0	0	0	0	0	0	0	0	0	0	0	0	0	0	0	0	0	0	0	0	1	0	0	0	0	0	0	0	0	0	0	0	1	0	0	0	0
3111	PF3D7_1125100	conserved Apicomplexan protein, unknown function	null	ATGCTTCGCATAGGCAAGAATAAAGCAAAAGGGAGCCTTTTCATTAAAAAGTGTTATTATACAAATAATAGTAAGGGATGGCTTAGGGAATACGTATATACAAAGTATCGTATAAGTTTGCCAAACATTGAAAACGTAAAATATGATGATATATATTTATCATGTCCTAGTAGGGATGACTTTTATGTATTCACAAAGAAAGTTCCTATATTTTTGAGATATCTTAAATTAATTACATCTTTAGAAAACCGTACTAACGATTTTATTGATTTTACAAAAAAGTGTGAGAACGGATTGAATGTAGAAAAAGATGTGTATTTAACAAAGGAGGAATTATTAGACATAATGTTTATAAATGGATATAGTACGAAAGAAATGAATGCTTTAGATTTATCTTTT…	MLRIGKNKAKGSLFIKKCYYTNNSKGWLREYVYTKYRISLPNIENVKYDDIYLSCPSRDDFYVFTKKVPIFLRYLKLITSLENRTNDFIDFTKKCENGLNVEKDVYLTKEELLDIMFINGYSTKEMNALDLSFCSTYQFHYPEISVLFNLDEEDVYKYCLKKRSENPQTLVHLKYEKEKNMLSSYGFIFVFLYFGLNNLVLCNAWFLSKTIPFFSVFYMLGSYFYKDIQKYINKDINLMIDENNKNKLLAEDIIYKQLKLFSKDTECTEQLISFKQYCNVLIKKYTHSYINFQKNKIVETLEKKLKEIYNDEQNYKNSLQNILIEEIIKKIYEKIKTDKTFADSILNDGINNIQNINQNDTLINYVKSELQNIQKMDQKNSIVTKVLEQYELKKQQYLA…	496	1	null	no	GO_0000276	GO_0005739	GO_0000276,GO_0005739	0	0	0	0	0	0	0	0	1	0	0	0	0	0	0	0	0	0	0	0	0	0	0	0	0	0	0	0	0	0	0	0	0	1	0	0	0
4192	PF3D7_1330600	elongation factor Tu, putative	null	ATGCTTAAAAGTAAATGTATCTTTTTGAACTCTTTTACGAAGAGTGATAAATTGAAGCACACATTTGAACGGTTAAACCTAATGATGGAAAAAAGAAATATGAATAATTTGTTATATAACAAAGCAGTTGAATGTCACATATATATAAGAAGAGATAGAGATACGAAGGAAACAAATAAAAAGTTAAACAATATGTATAATAAATATTCATGTAAATGTAATATAACAAATAAATGTAGTAATAAGAATAAAGTATATAATATATATAAAAGACAAAATAATTTGGTTGATAATAAAGATAAGTTCTTTTGTATATTTCGTCAGAATTTTGCTATTGGAATATTTGAGAGAAAAAAGCCTCATATGAATATAGGTACTATAGGTCATGTGGACCATGGG…	MLKSKCIFLNSFTKSDKLKHTFERLNLMMEKRNMNNLLYNKAVECHIYIRRDRDTKETNKKLNNMYNKYSCKCNITNKCSNKNKVYNIYKRQNNLVDNKDKFFCIFRQNFAIGIFERKKPHMNIGTIGHVDHGKTTLTAAITKVCSDLNRGVFKSYEEIDKTPEEQKRGITINATHVEYETEKRHYSHIDCPGHLDYIKNMITGTSQMDGSILVVSAYDGLMPQTKEHVLLSRQIGIEKMIVYLNKIDMCEDQELVDLVELEIRELLSFHKYDGDNIPFIKGSALKALNGDQSEYGVPSILKLLDACDNYIEEPKRKTDLPFLMSIDDVLQISGKGTVATGKVEQGTLKLNDQVEILGIKEKSIKTVITGIEMFRKILDTAQAGDQIGIMLKNVKRNDI…	505	0	null	no	GO_0005622	GO_0005739	GO_0005622,GO_0005739	0	0	0	0	0	0	0	0	0	0	0	0	0	0	0	0	0	0	0	1	0	0	0	0	0	0	0	0	0	0	0	0	0	1	0	0	0
255	PF3D7_0212200	ribosomal protein L12, mitochondrial, putative	null	ATGAAAAGGAATAAAATACTACTAAGAAGATATTTCAGCAGTGATAACATTTTTAATAAAAATGTAAAAAATGGACATACCCTTTTGCTTTATAATAAAATAAGAAATAATTTAGTCTTAAAAAAATATGTTAGTAGTAGTATTTTTGATGTATTCGATAAAATAAAAGATTCTAATAATAAAGAACATGACGAAACAACAGATGAAAATATAAATAAAAAAAGAAAACCATCTAAAAAAGTGTTAAAACTTGTAGATGAAATTTTAAATTTAACATTAATAGAAGCAGCTGATTTATGTGATTTATGTCAAGAAAAATTAGAAGGAAATCAAAAATTTAATAATTCCTTTTTTATTAATAGAAATCCTTTTCCTCATCCATCTAATTTTTTTGGTGCT…	MKRNKILLRRYFSSDNIFNKNVKNGHTLLLYNKIRNNLVLKKYVSSSIFDVFDKIKDSNNKEHDETTDENINKKRKPSKKVLKLVDEILNLTLIEAADLCDLCQEKLEGNQKFNNSFFINRNPFPHPSNFFGANQNIFPQPTAQNAMNINTNLVNDHTTCTTDSTLYSKEEKSEKKKNEEKKNTKSTFNVKLEKFDVKNKINTIKEIRKITNVGLKEAKDMVESAPFYIQKSVPSEKAEEMKKSFEQLGATIILE	255	0	null	no	GO_0005622, GO_0005840	GO_0005739	GO_0005622,GO_0005840,GO_0005739	0	0	0	0	0	0	0	0	0	0	0	0	0	0	0	0	0	0	0	1	0	0	0	0	0	0	0	0	0	0	0	0	0	1	0	0	0
1178	PF3D7_0603700	phenylalanine--tRNA ligase	mFRS	ATGTTATTACCCAAAACTATCTTATCAAATGAAGGAAGAATATTATGTAATACGATAAACCACCCATTGAGAACTGTAAAAAATAAGATCGAAAATTTTTTCAAGTTTGAAAATATTGACAATTTAAAAAGTGAAATATGTATAAAACAAAATTTCGATGATCTTAATGTACCTTTAACACATCCTGTAAGAAATATTAGAGATACCTTTTATTTAAATGAAAATTATATAAAGAACTATAATTCTATTCTTTCAACATATTATATACCATTTGATATTTTAAATACATTTTATAAATATTATTTAAGCAACAAATTATTATCTCATGATAAAATAATATTGAAAAGAACTCATATGACGTCACACTTAAATGATTTATTAAAAGGATCTTATACAAAT…	MLLPKTILSNEGRILCNTINHPLRTVKNKIENFFKFENIDNLKSEICIKQNFDDLNVPLTHPVRNIRDTFYLNENYIKNYNSILSTYYIPFDILNTFYKYYLSNKLLSHDKIILKRTHMTSHLNDLLKGSYTNVIYTGQVYRKDEIDKYHYPIFHQTDGFLIKPEMFNVEIELKQKLEQLIYYLFNKNNIEIKWESDTSFPFTHPSYELYIKRKQDNKWIEILGCGKIKNEVLAMSLYHNHINKIIENEITIYNKTLLNSFQQKFLSNEKETIRQSHLINHLCNKQLNHNIQIKINELLKSINYQGWAFGIGLERLCMLLYDINDIRLFWSNDKRFINQFKENQITTFRPFSNFPCIQKDISFYIKQYFNETSFFQICRDIANDNIEQIQKIDKYYDPK…	443	0	null	no	GO_0005737	GO_0005739	GO_0005737,GO_0005739	0	0	0	0	0	0	0	0	0	0	0	0	0	0	0	0	0	0	0	0	0	0	0	0	0	0	0	0	0	0	0	0	1	1	0	0	0
3507	PF3D7_1215300	10 kDa chaperonin	CPN10	ATGAGTTCTACTATAACTAGAAAATTTATTCCGTTGATGGATAGAATTTTAATAAGTAAAATAGTGCCAAAAACTACTACAAAGTCGGGACTATTTTTACCAGAAAGCGCAACTGAACCATCATACACAGGAAAGGTATTAGCTGTTGGTCCTGGAAGAGTAACTAGTAATGGTACCAAAATATCACCAAGTGTAAAAGAAGGAGATGTTGTTGTTTTACCTGAATATGGTGGTTCCTCTTTAAAAATTGATGGAGAAGAATTTTTTGTTTACAGAGATGATGATATAATTGGTATCATAAAAGACGAATAA	MSSTITRKFIPLMDRILISKIVPKTTTKSGLFLPESATEPSYTGKVLAVGPGRVTSNGTKISPSVKEGDVVVLPEYGGSSLKIDGEEFFVYRDDDIIGIIKDE	103	0	null	no	GO_0005737	GO_0005739	GO_0005737,GO_0005739	0	0	0	0	0	0	0	0	0	0	0	0	0	0	0	0	0	0	0	0	0	0	0	0	0	0	0	0	0	0	0	0	1	1	0	0	0
4525	PF3D7_1365500	aminomethyltransferase, mitochondrial, putative	GCVT	ATGAAGAATATTTTTAAATATAAAAATAGATTAACCTTTTTTAGAAAAGGTTTCTCAACAACTAATAAGCCAAAGGTGGAAATAAAAAAAACCATACTGTATGATTCACATAAGAAGAATAATGCAATTTTTAAGATACAACATGGTTTCTATTTACCAGACGAATACAAAGACATCACGTTGATTACCTCGAATTTGCATACTCGAACAAACTGTTCATTATTTGATTATACCTATAGACCTATATTAAAAATAAGTGGGGAGGATAAAATAAATTTCATTGAAAAATATGTAGGTAGTGATATTAAAGGATTATGGGAAAATGAATGTAGAATTAGTTTACTGTTAAATGACAAAGGTGGTATTATAGACGATATTATGATTATACTTCGAGAGAAA…	MKNIFKYKNRLTFFRKGFSTTNKPKVEIKKTILYDSHKKNNAIFKIQHGFYLPDEYKDITLITSNLHTRTNCSLFDYTYRPILKISGEDKINFIEKYVGSDIKGLWENECRISLLLNDKGGIIDDIMIILREKYLLLYLNIQCKEKVYKYLKDKLLENGKLQVQIEEFTSHSSICIQGSKSSDVLKELIDYNNESVETNLDNCSFMSSTLTKINKIDNCILNRYTCTGEDGFDILIPNKYVNDLYNLILKNELVKPGGLAVQNTLRLESGFCEYGKDINEDITPIESNYKWSLGQRRLKELNFNGAHIIMDQIKNGTKIKRVGILINTNIVPKENTKIYSHENAEQIIGYITSSVFSPVLQKPICMGYVKSEYAHINNLIKVDCLNKLEIAQITKLPFV…	406	0	null	no	GO_0005737	GO_0005739	GO_0005737,GO_0005739	0	0	0	0	0	0	0	0	0	0	0	0	0	0	0	0	0	0	0	0	0	0	0	0	0	0	0	0	0	0	0	0	1	1	0	0	0
4859	PF3D7_1428600	peptide chain release factor 1	RF1	ATGAAAAAACTATTATTTTTTTTTTATTGTTATATATGGTTTGACTTATTTGTTCATGTGTCTAACTTTTATATAAAACCAAAAAACTATTACACACATAAAGCCGAACGAACAAAAAAGAGTGTGTTGAAAAGATATTCATTTCAATTATATAATAAAAAACAAACAGATCTGTATAATGACAATAAAAATTTTATACGAATAGAATTTCGTCCAGGTGTAGGAGGAGAGGAAGCGTTCACATGGTCCAAAGAATTATTAAACACTTACAAATTGTTCGCAGAGAGGAATAAATGCAAAGTTGAAAAAATACAAGATATTAGTGATTCCTTAGTTATAAGTTCAAAGGAAAACTTACGTATAATTAAAGAGGACAAACAAATTGAAATAAATTTGTAT…	MKKLLFFFYCYIWFDLFVHVSNFYIKPKNYYTHKAERTKKSVLKRYSFQLYNKKQTDLYNDNKNFIRIEFRPGVGGEEAFTWSKELLNTYKLFAERNKCKVEKIQDISDSLVISSKENLRIIKEDKQIEINLYDLFKNESGIHQVKRIPKNDSKNRIHSSTATVAIFFHKKEEPKYEINLKDLKISTFRSSKPGGQNVNKIESGVCILHKPTGIQTECQEERTQELNKKLAMKRLIQKIQHMESKEKENMVQHERAKLIKESNRSNRIRTYNFFRGYITDHINKKKIDLIYFEKGKLEYILNIF	304	0	HMM: MKKLLFFFYCYIWFDLFVHVSN, NN: MKKLLFFFYCYIWFDLFVHVSNFY	yes	GO_0005737	GO_0005739	GO_0005737,GO_0005739	0	0	0	0	0	0	0	0	0	0	0	0	0	0	0	0	0	0	0	0	0	0	0	0	0	0	0	0	0	0	0	0	1	1	0	0	0
2796	PF3D7_1033000	conserved Plasmodium protein, unknown function	null	ATGCTTAAACATGTATTTTTTTGCTACCGCTGGAGAGCAGAATATGGATGGGTGAAAAGCAGATTAAATTTTTTATGTGGTGCATCGTGTTATAGCAGTAATATAAATATGGATAAGATAATAGATGAAAACAAATATGAGTATATAAAAAATTTGAGAAGTCAAGAGCTTCGAATATTATCAGAGAATTGTTGTGTAAAAAAGGTTGATGATGTAATAATATGGAGTGAGATATGTCGTCATTCTATAGAAAAGTATAATAGTTTTAAATATTTTGATGCTTTATTATTATTATCATCATTTGACAAAATGAATATAGTGGATAAGAGTTTATATAAGACATTTTCGGATGTATTTATTAAACAGATATCTTATTTAAAACCTGAGCATTTCATTTTA…	MLKHVFFCYRWRAEYGWVKSRLNFLCGASCYSSNINMDKIIDENKYEYIKNLRSQELRILSENCCVKKVDDVIIWSEICRHSIEKYNSFKYFDALLLLSSFDKMNIVDKSLYKTFSDVFIKQISYLKPEHFILLINLYCRVNIFPRVLFTEIFHGIIKYCNKLYPDEYVNLLTCFANLKIANKDLIKTLCKSIIKNINLFDYIHLTNIVGALRSLEITDDIFYYVIDQKQLKELKFLTVQEIFDFIKKIKLLQYSWKLYEQDLMKEFLFKVYNFKNEKDVDQLDDPFVCLNFLVSKGLLQGNNNTNIKKKNNNKKNNNNKKNNNNKKNNNNNNDNNNDNNNNDNNNNNDNNNNNDNNNNNSSSDFIDDINCGGANFLVALSKWCANQVYHYPSRSTKRP…	561	0	null	no	GO_0005737, GO_0005576, GO_0016020	GO_0005739	GO_0005737,GO_0005576,GO_0016020,GO_0005739	0	0	0	0	0	0	0	0	0	0	0	0	0	0	0	0	1	0	0	0	0	0	0	0	0	0	0	0	0	0	0	0	1	1	0	0	0
66	PF3D7_0107400	conserved Apicomplexan protein, unknown function	null	ATGTATAGAAGATATGTTTGGAATAGCATATTTCGAGATATAAATTATCGTTTGAAGAAAATTTATCATTCTTTTTATTATGCTCAGAGTCATATAAAATATGTCATGTTAATATTATTTCCTGCTATTATATGGACAACTAGATATCGAGCTGATACACAGCTAGGATATTTTTTTTATATTAATGACGAGAAATTATATCCATCTTATAGACATAATATAATCAAGAAAAAAATGAAATGGAAGAATGGATCCAAATTTTATTTAGATGACAACGTAACAGTAAAAGATGCGAAACGTATTATATATCAAGGAGAAGAAAATATTCCTGAAAAAATAAAATTAGGATGTAAAGGGAGAATAATGGATGACAATGATAATTTGGCTATGGCTGTTCGT…	MYRRYVWNSIFRDINYRLKKIYHSFYYAQSHIKYVMLILFPAIIWTTRYRADTQLGYFFYINDEKLYPSYRHNIIKKKMKWKNGSKFYLDDNVTVKDAKRIIYQGEENIPEKIKLGCKGRIMDDNDNLAMAVRAFCKRDPKVIIWQDEHSQYL	153	1	null	no	GO_0005737, GO_0005622	GO_0005739	GO_0005737,GO_0005622,GO_0005739	0	0	0	0	0	0	0	0	0	0	0	0	0	0	0	0	0	0	0	1	0	0	0	0	0	0	0	0	0	0	0	0	1	1	0	0	0
4286	PF3D7_1340800	mitochondrial pyruvate carrier protein 1, putative	MPC1	ATGTCTAATGTAGGATCATTTTTTCATAATGTTAAGAGGAATATTTTAAGTATTATGCTTTGGGCTCCCTTAGCTAATTGGGGTTTTGTTATAGCCGGATGCAACGATTTAAAGAAAGAACCCGTTTATATATCAGAAAAAATGACGACCGTTTTAACAATATATAGTTTATTGTTTATGAGATATGCACTCGCCATAAAACCAAAAAATTATTTACTTTTTTCTTGTCATGCTACTAATACGTTAGTTCAGAGCATTCTATTATATAAAAAATTAAAATACGAAACGAAACATCAAAAAATAAAAATAACAGCAAAATAA	MSNVGSFFHNVKRNILSIMLWAPLANWGFVIAGCNDLKKEPVYISEKMTTVLTIYSLLFMRYALAIKPKNYLLFSCHATNTLVQSILLYKKLKYETKHQKIKITAK	106	1	HMM: MSNVGSFFHNVKRNILSIMLWAPLANWGFVIAG, NN: MSNVGSFFHNVKRNILSIMLWAPLANWGFVIAG	yes	GO_0005743	GO_0005739	GO_0005743,GO_0005739	0	0	0	0	0	0	0	0	0	0	0	0	0	0	0	0	0	0	0	0	0	0	0	0	0	0	0	0	0	0	0	0	0	1	0	0	1
5277	PF3D7_1470400	mitochondrial pyruvate carrier protein 2, putative	MPC2	ATGGAAATAATAAAGAAAATATTTTATCCAAACATCATACCAAAACTAAAAAAAAAAATACAATGTTATAATATAAATGAAAGTTTAAAAAAAGTGCTTGTATCTGATACTGGTATCTTGACTATTCATTTTTGGGCACCTACATTTAAATGGTCCATATCATTAGCCAACATTGCAGATATTAATAGAGATCCAAGTTATTTATCTTTACCACAACAAATTGCTATCTGTTTAACTGGATTGCTGTTTACACGATTTGCTTATATGATTAAACCTAGGAACCTTAATTTGTTAACAATTAACTTCTTTATGAGTATGACATCTTTTTATCAAATATCTAGGATAGGACAATATAAATATAATGTATATATGAAGGAAAAAGAAAGGTAA	MEIIKKIFYPNIIPKLKKKIQCYNINESLKKVLVSDTGILTIHFWAPTFKWSISLANIADINRDPSYLSLPQQIAICLTGLLFTRFAYMIKPRNLNLLTINFFMSMTSFYQISRIGQYKYNVYMKEKER	129	0	null	no	GO_0005743	GO_0005739	GO_0005743,GO_0005739	0	0	0	0	0	0	0	0	0	0	0	0	0	0	0	0	0	0	0	0	0	0	0	0	0	0	0	0	0	0	0	0	0	1	0	0	1
2583	PF3D7_1012300	cytochrome b-c1 complex subunit 7, putative	QCR7	ATGTCTCTACATAAAGAAATTTGTAACTACATTGTAAAATTCAGCTCCAAGCCTGTTCAGAGGTTAGGATATGAACCACCTAAAAAAAAGAGAAGTATATTAAGAGAATTATATCATAAATTAATATTTCCATATTATTTTAAATTTATAAGAGCACCATATGAGAGATGGCAATTTTGTGCCACCACTAAATTTTTAAGAGAGCATGGATTAATGTATGATGATATGTACAGTGATAAAGATCCAGTTATTGAAAGAGCTATATCCTTATTACCGAAAGATATACAAACAAGGAGATATAGAAGGATGTTAAGAGGAACACACATAAATTATTTAAGACTTTTTTTACATCCTTCAGAACAAAATTATGATCCATATATACCATACCTCGCACCATAT…	MSLHKEICNYIVKFSSKPVQRLGYEPPKKKRSILRELYHKLIFPYYFKFIRAPYERWQFCATTKFLREHGLMYDDMYSDKDPVIERAISLLPKDIQTRRYRRMLRGTHINYLRLFLHPSEQNYDPYIPYLAPYIEEAKFQLQEEEELLGYHPYDRRLYSGGTTGFGDLEPGLHFLVSIPNLYGAAIPHSKKK	192	0	null	no	GO_0005750	GO_0005739	GO_0005750,GO_0005739	0	0	0	0	0	0	0	0	0	0	0	0	0	0	0	0	0	0	0	0	0	0	0	0	0	0	0	0	0	0	0	0	0	1	0	0	0
417	PF3D7_0306400	FAD-dependent glycerol-3-phosphate dehydrogenase, putative	null	ATGATTAAAAAAGTTGCTATTTGTAGTGGGACCTTGGGTATTTTATCCTATGGAGGGTTTTATTTTTTAAAAATAAATTTTCAAAAGAATATGATAGATAAAGATGTGACATATAAATATAGTCCTTGTATAAAAAGAAACGAAATGATTAAGAAGCTACAAGAAAATCAATATGATTTATTAATAATAGGAGGAGGTGCTACAGGTGCTGGTTTGGCCTTAGATGCAGCCACAAGAGGATTAAAATGTGCGCTAGTAGAAAAGAATGATTTTTCAAGTGGTACATCTTCTAAGTCTACCAAATTATTACATGGTGGTATAAGATATTTAGAAAATGCAGTAAATAATTTAGATTTTACAGAATTATATTTTGTATGGGAAGCATTAGCAGAAAGAGCG…	MIKKVAICSGTLGILSYGGFYFLKINFQKNMIDKDVTYKYSPCIKRNEMIKKLQENQYDLLIIGGGATGAGLALDAATRGLKCALVEKNDFSSGTSSKSTKLLHGGIRYLENAVNNLDFTELYFVWEALAERAHTMKIAPYLSRPVSILMPIYKYWQVPYFSYNIKIYDLLADLVCYFDKGVPNSLYIRKSNTIDNFPLLRKDKLKGSLIYFDGQHDDSRMNLNLILTSAIDNYVPGQIGATVCNHMEVKNFIKDENNKLVGVRAIDKINDKEIEIFSKVIINATGPYGDIIRKLADENRKPMIQVSVGCHFILPKWYSTKNNGMIIPKTSDDRVLFLLPWENNTLVGTTDEKRIMQDDPKIQEKDIEFLTNELSKYIHVSAEEIKNDITAAWCGFRPL…	653	1	null	no	GO_0009331	GO_0005739	GO_0009331,GO_0005739	0	0	0	0	0	0	0	0	0	0	0	0	0	0	0	0	0	0	0	0	0	0	0	0	0	0	0	0	0	0	0	0	0	1	0	0	0
3651	PF3D7_1230400	ATP-dependent protease subunit ClpQ	ClpQ	ATGTTTATCAGAAACTTTGTAAATATAATTGGATCACAAAAATCAATAACCAAAACAATTGCTAGAAATTATTTTTCTGATAACAGCAAGTTGATAATTCCTCGTCATGGAACTACCATATTATGTGTTAGGAAAAATAATGAAGTGTGTTTGATCGGTGATGGAATGGTTTCTCAAGGAACGATGATAGTTAAGGGAAATGCAAAAAAGATAAGACGTTTAAAGGACAATATATTAATGGGTTTCGCAGGAGCTACAGCGGATTGTTTTACCTTGCTAGATAAATTTGAGACAAAGATTGATGAATATCCAAATCAACTTTTGAGAAGTTGTGTTGAGTTAGCCAAACTTTGGAGAACTGATAGATATTTAAGACATTTAGAGGCCGTTTTAATAGTG…	MFIRNFVNIIGSQKSITKTIARNYFSDNSKLIIPRHGTTILCVRKNNEVCLIGDGMVSQGTMIVKGNAKKIRRLKDNILMGFAGATADCFTLLDKFETKIDEYPNQLLRSCVELAKLWRTDRYLRHLEAVLIVADKDILLEVTGNGDVLEPSGNVLGTGSGGPYAMAAARALYDVENLSAKDIAYKAMNIAADMCCHTNNNFICETL	207	0	null	no	GO_0009376, GO_0005839	GO_0005739	GO_0009376,GO_0005839,GO_0005739	0	0	0	0	0	0	0	0	0	0	0	0	0	0	0	0	0	0	0	0	0	0	0	0	0	0	0	0	0	0	0	0	0	1	0	0	0
2746	PF3D7_1028100	protoporphyrinogen oxidase	PPO	ATGAGCGAATATAAAAAATATAATGTACCTTCACATGAAATTTATGATGTTATTTTAATTGGTGGTGGCTTATTTAATTGCTGCCTGTACTATTATTTAAAATTAAAAAATTCTGAACTGTCTATAATAATAGTAGAAAAAGAAGAAAACTTAGGAGGGTATATAAAGACATATACATATAATATTGATGATAAAAAAATATTAGTAGAGTTAGGTCCGAATATGTTTAAATTATGTAATGAGAGTTATAATTTAATTAATAAACTTAATTTACTTTCTAGTGTTAGATTATTAGACGATACACTTATAAGATATATATATATAAAAAATGATAAATTATATCCGTTGTATTTAAATATATTTTCTTATTTATCTTTCCCTTTAATAAATATTTCAAAT…	MSEYKKYNVPSHEIYDVILIGGGLFNCCLYYYLKLKNSELSIIIVEKEENLGGYIKTYTYNIDDKKILVELGPNMFKLCNESYNLINKLNLLSSVRLLDDTLIRYIYIKNDKLYPLYLNIFSYLSFPLINISNKIKLLFKLIFKQYKNLNSYTNDISVENYMNDNFDSQHYNFLLLPFIYGSCAGNGKISAVSFFSRNLKLFHNKVNSLYIWNEKIKSEEKNRNIKCVNNNTFIYQHMNKKKKNFNLFTPCYNFFYISNKNMKMDVYLNVLYNYYSSNKKTEKKNVFNYICYRIPILLLHMKQFSINIFRHISIFLKCTYQFFYPFLMLPDLAKWTTSHFDDEKKKKKNLIGKTVTFKNGLYELIDKLQSHMNKEFIYTNHEVDFIEKAYNNLWMCNIK…	609	2	null	no	GO_0016020	GO_0005739	GO_0016020,GO_0005739	0	0	0	0	0	0	0	0	0	0	0	0	0	0	0	0	0	0	0	0	0	0	0	0	0	0	0	0	0	0	0	0	0	1	0	0	0
3500	PF3D7_1214600	adrenodoxin-type ferredoxin, putative	null	ATGATAACAAAGTTTTCAATTTTAAATAAAAGCAAAATTTTTAATACAATTTTGTATAATACAATACGACAAAATAATATTTTTTTTAACAATGGAAAGTTTTTTACAACGCAGAATGTAGACGAAATCGATGTAACGTTTATAAATCAAGATAATTATGAAAAGACTGTAAAAGCCAAAATAGGAGATAGTATTTTAAAGGTGGCTCATGATAATCATATAAATATAGAGGGTGCTTGTGAAGGATTTTGCGCTTGCTCTACATGTCATGTAATAATTGATGAAAATTTTCACGATTTATTACCAGAACCTTTGGACAATGAAATAGATATGTTGGAACTTGCACCTTGTATAACAGAGACATCCAGATTAGGATGTCAAATAAAACTAAGTAAAGAA…	MITKFSILNKSKIFNTILYNTIRQNNIFFNNGKFFTTQNVDEIDVTFINQDNYEKTVKAKIGDSILKVAHDNHINIEGACEGFCACSTCHVIIDENFHDLLPEPLDNEIDMLELAPCITETSRLGCQIKLSKELDGMKIQLPPMTRNFYVDGHVPTPH	158	0	null	no	GO_0016020	GO_0005739	GO_0016020,GO_0005739	0	0	0	0	0	0	0	0	0	0	0	0	0	0	0	0	0	0	0	0	0	0	0	0	0	0	0	0	0	0	0	0	0	1	0	0	0
4969	PF3D7_1439600	conserved Plasmodium protein, unknown function	null	ATGCTCATATTTCAGAACGCACAACATTATTTTAATTTTTTTCGCAACTTTAACGGTTGCTATACGGATAATAAATTACTGAAATTTTTTTTCAAAAAGAGTTATAACAATTGGTTTAATGATCCAAGTCAATATAATTATTATTTTATATCCTACTATGCTGTAGCTCTTTCTATGTGTATTATATTACGTAACTTATTATTTAATCCTGATGTACATTTTAGAAGACAAGATAAAAGAAGAAATATAATTGACAGATATCAACACCATGCATATTCACTTCCATATTTTAATCACTGGTTAAGAAATTTCAGTCAATCATTTAAAAGTTCTCTTATTGATAATGAACCAGATTATCAAGATGTAGACCCTTGGTCTTTCCGACCTAACCGAATTCAA…	MLIFQNAQHYFNFFRNFNGCYTDNKLLKFFFKKSYNNWFNDPSQYNYYFISYYAVALSMCIILRNLLFNPDVHFRRQDKRRNIIDRYQHHAYSLPYFNHWLRNFSQSFKSSLIDNEPDYQDVDPWSFRPNRIQFYGRFPFFFEIPKYHIDDPTFDKNSYKYMQNYYEEIGYVQKPENMRV	180	1	null	no	GO_0016020	GO_0005739	GO_0016020,GO_0005739	0	0	0	0	0	0	0	0	0	0	0	0	0	0	0	0	0	0	0	0	0	0	0	0	0	0	0	0	0	0	0	0	0	1	0	0	0
5154	PF3D7_1458100	protein PET117, putative	PET117	ATGAGAAAGCATACTGGGAAAATTTTACTTGCATCTTCTTGTGCTCTTAGTGTTGGTATTTATTATTATGTAAAAACATCCAAATACTCAGATTATAAGAAAAGATACGAAGGTGTTTTAAATGATATAGAAAGACAAAAAAAAAAATTCAAAAAATGGACATCTGAAAATTTATAA	MRKHTGKILLASSCALSVGIYYYVKTSKYSDYKKRYEGVLNDIERQKKKFKKWTSENL	58	1	null	no	GO_0016020	GO_0005739	GO_0016020,GO_0005739	0	0	0	0	0	0	0	0	0	0	0	0	0	0	0	0	0	0	0	0	0	0	0	0	0	0	0	0	0	0	0	0	0	1	0	0	0
5325	PF3D7_1475300	cytochrome c oxidase assembly protein COX11, putative	COX11	ATGAAAATTTTGAAAACCTTTTTTAAAAGATTACACTTGAGGAATAAAAAAAATGTTATATCACCTTATAGGATATTAGAAAGGAAAGAAAAATTAGATATTCCATATGCGTGTTTATCCTTATCTGCTATAATGTTTGGATTATCTTTTGCTTTTGTACCCTTATATCAATTATTTTGTCAATCCACAGGTTATGGTGGTACAATACAAAAGCGATTGGATATAGGTAAAATATTTAATAGGAAAAAGGATGAAAAGAATAGATTAATTGAAATAAATTTTACTAGTCAATCTAATATGCCATGGGTATTTGAACCTGAACAAAAATATATTATAGTAAAGCCAGGAGAAACAGTATTAGCTTTTTATAAGGCAAAAAATTTAATGGATAAGCCTATT…	MKILKTFFKRLHLRNKKNVISPYRILERKEKLDIPYACLSLSAIMFGLSFAFVPLYQLFCQSTGYGGTIQKRLDIGKIFNRKKDEKNRLIEINFTSQSNMPWVFEPEQKYIIVKPGETVLAFYKAKNLMDKPIIGIALYHVLPEEAGLYFNKIQCFCFEEQMLNAKEEMDLPILFFIDPEILNDSRLKNLEKITLSYIFFESDSEIPEEYQNLSRAISPYKKTEIQVI	228	1	null	no	GO_0016020	GO_0005739	GO_0016020,GO_0005739	0	0	0	0	0	0	0	0	0	0	0	0	0	0	0	0	0	0	0	0	0	0	0	0	0	0	0	0	0	0	0	0	0	1	0	0	0
3455	PF3D7_1209900	ABC transporter B family member 7, putative	ABCB7	ATGATAATAAAACGGCATCTGATAAACTACTATTATCTAATTAATAATAACAATAATGGTTATTTTTTGTTTGGGCAGAATGTAAGAAATGTAAGGAATTGTAAAAATTATGGGAACGCATTATATTATAATAATGTTGGAATAAATAATATACACACTTATAAGAAATATTCTCCGTCAGGAGGAAGAGATTTTTTTTTTTTAAACAATAAAAGTGGAGGAATGACATGTTATTATAAAAGTATGGGTATATATAAAAATATTAATATTAAGGATCCTAATAATAATAGTAATATAAAATATGGAATTATGAGAAAGAAAGGAAAAAATATATTTAATAATATGATGAATAATTATACACATAAAAAATGCTTTAGGTCCCATTTATTTGATCCAAAG…	MIIKRHLINYYYLINNNNNGYFLFGQNVRNVRNCKNYGNALYYNNVGINNIHTYKKYSPSGGRDFFFLNNKSGGMTCYYKSMGIYKNINIKDPNNNSNIKYGIMRKKGKNIFNNMMNNYTHKKCFRSHLFDPKKNSIIDNIKDKFNELFMKRIGENNNNNNNNNNKSNNNDNNNNKNHNHKSNNVSSLKDLFNILKKERKYLGFAMFCLIASSLGQMIFPMCISKIINMYGGKEESLKYLTNEIYKTVLLIIGISTFSFFRIYFIETSIEKITRRLRTHFFEKVLNQDVHFFNKQKTGELINRLSNDIEISSKFLIHLSFGIRNFISALIGGICALHISPRNLFQSFLLPVSGCLLIGTTYAKFVKKISVLKQEKLSSCIDFASEKIHNISNVRLLNGE…	855	5	null	no	GO_0016021	GO_0005739	GO_0016021,GO_0005739	0	0	0	0	0	0	0	0	0	0	0	0	0	0	0	0	0	0	0	0	0	0	0	0	0	0	0	0	0	0	0	0	0	1	0	0	0
380	PF3D7_0302700	CDGSH iron-sulfur domain-containing protein, putative	null	ATGAAGGATCCATTAGAATATTTAAATAAAATAAACTTTAATACGAATAAGTTTCCTCAATATACACATTTAATTGAAAACTGTCCGTCGGAATATGAAAATGAAAAGGTTATAAGAATTTGTCGATGTTGGCAATCAGCTAAATTTCCCTATTGTGATGATACACATAAGATATTTGTTGAAAACGGTGACAATGTTGGACCATATGTTGCCAAGTTAGTCAGCTACAAATTGTCAGATGAAGAAAAATTGAAGAAACAAAAATACAATGAAAAGTATATAAAACTAAATAATAAAATGTCTTATATAAAATCGGAAAATTTTAATTTTAAATGGTTTCCTACACCTATTATAAATTATAAATTTAAAAAATATGTTTTGTTATCTTTTTTTGTTCTA…	MKDPLEYLNKINFNTNKFPQYTHLIENCPSEYENEKVIRICRCWQSAKFPYCDDTHKIFVENGDNVGPYVAKLVSYKLSDEEKLKKQKYNEKYIKLNNKMSYIKSENFNFKWFPTPIINYKFKKYVLLSFFVLTSSVLYTKKEKLYNFNTES	152	0	null	no	GO_0043231	GO_0005739	GO_0043231,GO_0005739	0	0	0	0	0	0	0	0	0	0	0	0	0	0	0	0	0	0	0	0	0	0	0	0	0	0	0	0	0	0	0	0	0	1	0	0	0
750	PF3D7_0416700	CDGSH iron-sulfur domain-containing protein, putative	null	ATGGGTAATAATATGTTAAAAGCGAAATCACGTAATGTCTTTCGCAAAAAAGGTGATATATTAAATACAAATAATTTAAAGGCAGTACATATCGAAACTTTCTATCCACCCTTAAAAAGTTCGAAAAAAGTTTCCGTGTGTAGATGTTGGAAATCTTTTAATTTCCCATATTGTGATAATACTCATCAAAAATTGCAACAACAAGGAGTAGTTTGTGGACCATTACTTTTAGAAATACGTAAAAGCAAGACAGTACGTTCTCCTCAATAA	MGNNMLKAKSRNVFRKKGDILNTNNLKAVHIETFYPPLKSSKKVSVCRCWKSFNFPYCDNTHQKLQQQGVVCGPLLLEIRKSKTVRSPQ	89	0	null	no	GO_0043231	GO_0005739	GO_0043231,GO_0005739	0	0	0	0	0	0	0	0	0	0	0	0	0	0	0	0	0	0	0	0	0	0	0	0	0	0	0	0	0	0	0	0	0	1	0	0	0
2694	PF3D7_1022900	CDGSH iron-sulfur domain-containing protein, putative	null	ATGAGTTGGCAACAATGGTGGCCTCATGACCCAGTAGTAAAAACAGATTTAGTTGATCCATATCTTGTGAAAGTAGAAAAAAAAAAGGTTTATTGGTATTGTTCTTGCGGAACAAGTAAAACTCAACCATGGTGTGATGGATCACATAAAGGAACAAGATTTAAACCAATGATGTATATTCCTCAAACAAGTGGATATAGACTTTTATGTGGATGTAAACAAAGTATGCATTTACCACATTATGATTTTGCGGATTTATGGGTTCGAGCAAATAGAAATGTTCCTAAAGCAGCTGCATTTACATATGTTGCACTTTTTTCGTTTGGTATCATGACATCGTGGTTATTTCATCCTTAA	MSWQQWWPHDPVVKTDLVDPYLVKVEKKKVYWYCSCGTSKTQPWCDGSHKGTRFKPMMYIPQTSGYRLLCGCKQSMHLPHYDFADLWVRANRNVPKAAAFTYVALFSFGIMTSWLFHP	118	1	null	no	GO_0043231	GO_0005739	GO_0043231,GO_0005739	0	0	0	0	0	0	0	0	0	0	0	0	0	0	0	0	0	0	0	0	0	0	0	0	0	0	0	0	0	0	0	0	0	1	0	0	0
4092	PF3D7_1320800	dihydrolipoyllysine-residue succinyltransferase component of 2-oxoglutarate dehydrogenase complex	null	ATGACAAAGAATCTTGTATTTCGATTAAATAAATCCTTATTACATCATGTCAAAAGTTTTAATAGAACATTTTTAAACCATAAGTATAATTCAAATGCAAATATTGAAGGATCACTTAAGAGATATTTTTCCATAGAAACCATTAAAGTACCTAGACTTGGTGATTCAATCACAGAAGGTACAATAAATGAATGGAAAAAAAAAGTGGGAGATTATGTTAAGGCGGATGAAACGATAACAATTATCGATACAGATAAAGTTAGTGTTGATATAAATTCTAAAGTAAGTGGAGGGTTATCCAAAATTTTTGCGGATGTAGGAGATGTTGTTTTGGTAGATGCACCTTTATGTGAAATTGATACATCTGTAGAACCACCTGAAGATATTTGTAAAACTAAA…	MTKNLVFRLNKSLLHHVKSFNRTFLNHKYNSNANIEGSLKRYFSIETIKVPRLGDSITEGTINEWKKKVGDYVKADETITIIDTDKVSVDINSKVSGGLSKIFADVGDVVLVDAPLCEIDTSVEPPEDICKTKEEVGESKNNENNYTFNQLNRDIKDEAHIKDEVSKNEKDIFVKDPICFGNDYESINERTERRVRMLPIRKRIAERLKESQNTCALLTTFNECDMSKAMLLRSELNDIFQKKYSCKLGFVSLFMYASTLALKKMPNVNAYIENDEIVYKNYIDISVAVATPNGLTVPVIRNCQNKNLPQLELALSDLATKARSNKLSIDDFSGGTFTISNGGVFGSMLSTPIINMPQSAILGMHTIKNRPVVVNNEIVIRPIMYLALTYDHRLLDGRE…	421	0	null	no	GO_0045252	GO_0005739	GO_0045252,GO_0005739	0	0	0	0	0	0	0	0	0	0	0	0	0	0	0	0	0	0	0	0	0	0	0	0	0	0	0	0	0	0	0	0	0	1	0	0	0
3335	PF3D7_1147700	ATP synthase subunit delta, mitochondrial, putative	null	ATGTTTTATAGAACAAGAAGAATATTTTTTAGTACTGCAAAAAATAGTAACCTGTATTTATCGATTTCTTCCTCAAGTGAATCTATATTTAGAAATCAAGTAATAAAAAGAGCTTCCTTTCCAGGTATTGAAGGTTATTTTACTGTAACTAATAATCATAGTCCCCTAGTTACTTTATTAAGAAATGGAATAATAACAGTCGAATTTGATGATAAGGAAAAGAAACAATTTTTTATTTCAGATGGAATATTTATATACAAAAAGAGTAATGACAATAATAGTAGCAATAATGCTGAAATAGTTGGTGTGGAAATAGTTCCATTAGAATATTTAGACAAAAATAAAACAATTAAAGTTTTACAAGAAATGTGTGCAATAAATGATGCTACGGATGATAAA…	MFYRTRRIFFSTAKNSNLYLSISSSSESIFRNQVIKRASFPGIEGYFTVTNNHSPLVTLLRNGIITVEFDDKEKKQFFISDGIFIYKKSNDNNSSNNAEIVGVEIVPLEYLDKNKTIKVLQEMCAINDATDDKWRKIKTLLGKELCSSILRVAT	154	0	null	no	GO_0045261	GO_0005739	GO_0045261,GO_0005739	0	0	0	0	0	0	0	0	0	0	0	0	0	0	0	0	0	0	0	0	0	0	0	0	0	0	0	0	0	0	0	0	0	1	0	0	0
305	PF3D7_0217100	ATP synthase F1, alpha subunit	null	ATGAAGGCTAGCGGATTATGCCAACAATTGAATAAGTGCATGTGGAATCAACTTGTCGTATCGAGGAAGTGTATAAAGAAGTTTGTTTGTAATTATTCAACAAAGATTAGTCCAATAGAGATATCAAAAATATTAGAAAAGAAATTTGAATCTTTTAATTTCAAAACGTCGTCTAACGAAGTTGGTTATGTGTTGAGTGTTGGTGATGGTATATGTCGAGCTTATGGATTGAACAATGTAAAATCTTCTGAGTTGGTAGAGATACATAATGAGGATGATAAAGGGAGTGTTACGTATGGAATGGCTACGAATTTAGAATATGATAATGTTGGAATTGTAATATTTGGAAATGATAGAAATATAAAAGAAGGAGATGTAATAAAGCGTACAAATCGTATT…	MKASGLCQQLNKCMWNQLVVSRKCIKKFVCNYSTKISPIEISKILEKKFESFNFKTSSNEVGYVLSVGDGICRAYGLNNVKSSELVEIHNEDDKGSVTYGMATNLEYDNVGIVIFGNDRNIKEGDVIKRTNRIIDVNVGYELLGRVVDALGNCIDGEKNVVTKERRKIEIKAPGIIARKSVNESIITGIKCIDSLVPIGRGQRELIIGDRQTGKTAIAIDAIIHQKNINDNVLNNNEKVYCIYVAIGQKKSNIAKLVNLLKKYDALKYTIIVNSSASDASPLQFLAPYTGCAMAEFFRDNGKHALIIFDDLSKQAVAYRQLSLLLRRPPGREAYPGDIFYIHSKLLERSSKLNDNLKGGSLTALPIIETLNNDVSAYIPTNVISITDGQIFLESELFYK…	551	0	null	no	GO_0045261, GO_0033178	GO_0005739	GO_0045261,GO_0033178,GO_0005739	0	0	0	0	0	0	0	0	0	0	0	0	0	0	0	0	0	0	0	0	0	0	0	0	0	0	0	0	0	0	0	0	0	1	0	0	0
3703	PF3D7_1235700	ATP synthase subunit beta, mitochondrial	null	ATGCATAAGTTGAAACTGTTCAATCACTGGAAGAAGCTTCCAATGTTCATGAAATTTGGAGGCTCTCCAAATTTACGAATGAATTGTCGCTATGTTAGTAGCAGTGAACATTTAAATATGAAGAAAAATATAAGCGTTGGAAATAAGAATACTGAAGTTAGTAATAAAATAAAAATTGGTAAAATAGCCCAAGTGATAGGTGCAGTAGTAGATGTAGAATTTGAGGATACACCACCATCTATATTAAATGCTTTAGAAGTAGAATTGGATAACAAGAAATTAATTTTAGAAGTTGCTCAGCATCTAGGTAATAAGGTAGTAAGAACAATTGCAATGGATGCTACCGATGGTTTAGTTAGAGGTCAAGAAGTAAAGGATAGTGGTAACCCTATATGTGTA…	MHKLKLFNHWKKLPMFMKFGGSPNLRMNCRYVSSSEHLNMKKNISVGNKNTEVSNKIKIGKIAQVIGAVVDVEFEDTPPSILNALEVELDNKKLILEVAQHLGNKVVRTIAMDATDGLVRGQEVKDSGNPICVPVGKETLGRIMNVIGEPIDECGHINHKKTLPIHRDPPLFTDQSTEPALLITGIKVVDLIAPYAKGGKIGLFGGAGVGKTVLIMELINNVAKKHGGYSVFAGVGERTREGNDLYHEMITTGVIKKKKIGNNEFDFNGSKAALVYGQMNEPPGARARVALTGLTVAEYFRDEENQDVLLFIDNIYRFTQAGSEVSALLGRIPSAVGYQPTLATDLGALQERITTTKNGSITSVQAVYVPADDLTDPAPATTFSHLDATTVLSRSIAEL…	535	0	null	no	GO_0045261, GO_0033178	GO_0005739	GO_0045261,GO_0033178,GO_0005739	0	0	0	0	0	0	0	0	0	0	0	0	0	0	0	0	0	0	0	0	0	0	0	0	0	0	0	0	0	0	0	0	0	1	0	0	0
5118	PF3D7_1454600	mitochondrial ribosomal protein S11 precursor, putative	null	ATGAATGTTTTATCTAAAAACAAGAGCCTTGTTAATTATAAAACCATATTCTCAAGTCCCATTTACATGAATATATGCATAAACCATTTTGTAAATAAATTAATAAATGTATATTCAGCAAAAAGTCTAAAATTTACGACCCTTTCTTCAGATGCAGTAAAGGCAATAACGAATTTAAAAGAATCTGTAAAGAAGCCAGATAAAAAAAAGAAAAACATTACAAGGGAGACACTTAAAAATTGTCAAGGTCATAAGAGAAGATACAAATTATTTGGTGATAGAGAAGAATTTCATAATATAGATAGAGATAAAAATAATTTAATAATTGAACCTACAGATAGTTTTCGAGCTGTTATTACTACATCTAAAAATAATGTACATATTCAAGTTGTAAATAAA…	MNVLSKNKSLVNYKTIFSSPIYMNICINHFVNKLINVYSAKSLKFTTLSSDAVKAITNLKESVKKPDKKKKNITRETLKNCQGHKRRYKLFGDREEFHNIDRDKNNLIIEPTDSFRAVITTSKNNVHIQVVNKSKNYKTIFGSFAGNVGFTKTLQQSERCAYRIGENIAKKCRRLGIFSIDIKFRRIMRVETVLQAMYANNLNITQIIHEPRLPKCGLNASKPRKRRRV	229	0	null	no	GO_0005840	GO_0005739, GO_0000314	GO_0005840,GO_0005739,GO_0000314	0	0	0	0	0	0	0	0	0	0	0	0	0	0	0	0	0	0	0	0	0	0	0	0	0	0	0	0	0	0	0	0	0	1	0	0	0
4884	PF3D7_1431000	mitochondrial ribosomal protein L17-2 precursor, putative	null	ATGGGATATACTTCTACCCTTAAATTCGTGAACTTAGGGGTGAGGAGGAGATTATTTAGAAGAGCTCATAAACAGCCACATCATAAATGGGATAGTATAAAAAACCAGTTGAATGAATTATTAAAATATGGAAGGATAGAAACAACTTTAACAAAGGCAAAAGAGTTACAAGGATATGCTGAGGAGTTAATTTATTTGGCTAAAAAAGATAATGTAGAAAATAATTTAAAAGTAGAAAGTATGTTAAGAACAGCACAAGGGAGAAGAAGATTATACGAATTTTATGTGCCATTATATAGACATAGACCTTTTTTTTTTACTAGGATTATTAATCAATGGAAATTACGTTTAAGAGATTCAGCACCTTTGGCTTATATCGAATTTATAGATAGACCAGGA…	MGYTSTLKFVNLGVRRRLFRRAHKQPHHKWDSIKNQLNELLKYGRIETTLTKAKELQGYAEELIYLAKKDNVENNLKVESMLRTAQGRRRLYEFYVPLYRHRPFFFTRIINQWKLRLRDSAPLAYIEFIDRPGELRPAKPVGYNKIKFIYEEMKKNRRNFRKYFNIAKRFHLLDENDHLLPDFADTGHVPEKSWYDEENEEDDDEIIINPELIQKYKKFNNPMLKGPKKGREPFYVDLPLPSVTERTFLNYRKKFKP	257	0	null	no	GO_0005622, GO_0005840	GO_0005739, GO_0000315	GO_0005622,GO_0005840,GO_0005739,GO_0000315	0	0	0	0	0	0	0	0	0	0	0	0	0	0	0	0	0	0	0	1	0	0	0	0	0	0	0	0	0	0	0	0	0	1	0	0	0
5313	PF3D7_1474100	mitochondrial ribosomal protein L20 precursor, putative	null	ATGAAATTACCAAGAGAAGTTGTTTTTCAAGTTGCCAAAGGATTTAGAGGAAGGAGTAAAGGATGTTTTAAAATAGCAAGGAGTAGAGCAATGAAAGCTTTGTTATATTCTTATATAATGAGGCGTCAAAAATATAGGAGATTAAGAGTTCATTGGATTGCTAGTATTAACCGGGCATGTAGAGAATGGAAGTTTACATATGCTCATTTTATGAATAGTTTACTTAACAACAATATTTTGTTAAGTAGAAAAAGTTTGTATAATTTATGTTATACGGAACCTATTAGTTTTAAGTGTTTAATTGATGAGTCAAAATTTCTTTATTTCCAGAGAAAATTGAAGTATCGTGATATATCACAGCTGTGA	MKLPREVVFQVAKGFRGRSKGCFKIARSRAMKALLYSYIMRRQKYRRLRVHWIASINRACREWKFTYAHFMNSLLNNNILLSRKSLYNLCYTEPISFKCLIDESKFLYFQRKLKYRDISQL	121	0	null	no	GO_0005622, GO_0005840	GO_0005739, GO_0000315	GO_0005622,GO_0005840,GO_0005739,GO_0000315	0	0	0	0	0	0	0	0	0	0	0	0	0	0	0	0	0	0	0	1	0	0	0	0	0	0	0	0	0	0	0	0	0	1	0	0	0
3737	PF3D7_1239100	mitochondrial ribosomal protein L23 precursor, putative	null	ATGTTTTTGAGCTTTGTTCGATATACTCCTCCTAAAACGCCAAGAAATGTATTTTTTCCATGGCATACATTTTGTATACATAAGTCAGGTAGTTTCTTAGAAAAGAACCGATTGGCTTTAAGAGTTCCTATAAATTTGACAAAATTTGAAATACGAGAATATTTAAGAAAAATATATAATGCAAAAGTAATTAAGGTGAATACATTAATTAAGATACCTGAACGACGACGTAATTTAACAGATCATAGATTTAATTATTATAGGAATGGACCAAGATATAAAAAAGCTATTATTACATTAGAACATGAAGTACCGGATAGTGTTAAAATGATACAGTCATGTAAAAATATAGGTAGAAATCCATATATAACAAAAAAAAATATTACATATGGGGTTAGA…	MFLSFVRYTPPKTPRNVFFPWHTFCIHKSGSFLEKNRLALRVPINLTKFEIREYLRKIYNAKVIKVNTLIKIPERRRNLTDHRFNYYRNGPRYKKAIITLEHEVPDSVKMIQSCKNIGRNPYITKKNITYGVRSDVKIRPTRSQLWHMGECRYSWRLPLTNLLSDYNMNLNPDLRIDDEFVQLTPDPTKPFMHSGISSETIKPNNVPKQTFPHIDLTPWRRQVKKIYDSGTLAPPESFPVTYNGKETIEYSSENKNIKKSSSSKWKPPS	269	0	null	no	GO_0005622, GO_0005840	GO_0005739, GO_0005840	GO_0005622,GO_0005840,GO_0005739,GO_0005840	0	0	0	0	0	0	0	0	0	0	0	0	0	0	0	0	0	0	0	1	0	0	0	0	0	0	0	0	0	0	0	0	0	1	0	0	0
1073	PF3D7_0524700	mitochondrial import receptor subunit TOM22, putative	TOM22	ATGGGAACAGCACTATCAAAAATTATTACGATAAATGAAGAAAATCGTTTGGTAATATCGAACAAGCCAGTTTTTCAATTAGCCCATAAGGATGCCATTCGTATGAGAAATAAATTAAGAGTAGCAAAGAATAGAATAAATAATTTTCTTAAAAAAAGTATAAAAACAACATCATGGGTTGTATGGATAGCAGGTGTTTCAGTAGTTGTTTTAGTAACACCTATAGCTTTTCAATATGAAAAAGAGTGTCAATTATTTGAAATGCAAGCTCAGTTCTTTCAAGCCCAACAAGCAGCCAATGTTCCACAATTAAACTAA	MGTALSKIITINEENRLVISNKPVFQLAHKDAIRMRNKLRVAKNRINNFLKKSIKTTSWVVWIAGVSVVVLVTPIAFQYEKECQLFEMQAQFFQAQQAANVPQLN	105	1	null	no	GO_0005741	GO_0005742, GO_0005739	GO_0005741,GO_0005742,GO_0005739	0	0	0	0	0	0	0	0	0	0	0	0	0	0	0	0	0	0	0	0	0	0	0	0	0	0	0	0	0	0	0	0	0	1	0	1	0
1313	PF3D7_0617000	mitochondrial import receptor subunit TOM40, putative	TOM40	ATGGAGATAACAAACATTTTTAAGAAATTATTATGCAGACAAAATGTAGTACATACAGAAAATAATTCCTTTTTTGATGTTTTTAAAGACCCAAATGAAGAGGGTTTAAAAAGAAAGAATGAAGTTGATAATGAAATGAAAAATAAGAGTATGGTGAAAGAGAATAATGATGATACCATAAAAACAAGTGAAGAAGATAAATTGAAAGAACAAAATTTATTAGGATATGCAAATTCCTTTGATGCTCCTAATGCTTTATTATTTGAAAATTTAAATAAAGAATATAAATTTATAACAACTCAAGATAATTTTGATGGTTTTCGTTTTGAAGTAGATAAAAATATAAATAAATTTTTACAATCGACACATACATTATTTCTAGGAACAACATTAAGGGAA…	MEITNIFKKLLCRQNVVHTENNSFFDVFKDPNEEGLKRKNEVDNEMKNKSMVKENNDDTIKTSEEDKLKEQNLLGYANSFDAPNALLFENLNKEYKFITTQDNFDGFRFEVDKNINKFLQSTHTLFLGTTLREVGYLYQFGANFTNLDNSLLMISRINIDGSVNGRFCKKINNNIDCKLNFNTYAKNDTRNMYEMSLEVNKPLYTYNFKSIWQGAWIFNTSYTQLLTKKLQAGVDLTYIASNCASIGSFGLRYNHKNNVLTMQIVRQPNFKSPEFMLNQTHLYKIQYAKKISDRLSLGTELEITPQTKESAMRLGWDYSFRHAKVQGSIDTSGKISVFTQDYSGFGVSGYIDYLNNDYKFGFMMHISPSQEQPQTAA	377	0	null	no	GO_0005741	GO_0005742, GO_0005739	GO_0005741,GO_0005742,GO_0005739	0	0	0	0	0	0	0	0	0	0	0	0	0	0	0	0	0	0	0	0	0	0	0	0	0	0	0	0	0	0	0	0	0	1	0	1	0
1174	PF3D7_0603300	dihydroorotate dehydrogenase	DHODH	ATGATCTCTAAATTGAAACCTCAATTTATGTTTTTACCAAAGAAACATATTTTAAGTTATTGTAGAAAGGATGTTTTAAATTTGTTTGAACAGAAGTTTTATTATACTAGCAAACGGAAAGAAAGTAATAATATGAAGAATGAATCTTTATTAAGATTAATTAATTATAATAGATATTATAATAAGATAGATTCTAATAATTATTATAATGGTGGAAAAATATTAAGTAATGATAGGCAATATATATATTCACCATTATGTGAATATAAAAAGAAAATAAATGATATATCATCATATGTATCTGTACCTTTTAAGATTAATATAAGAAATTTAGGTACTTCCAATTTTGTAAATAATAAGAAGGATGTACTTGATAATGATTATATTTATGAAAATATT…	MISKLKPQFMFLPKKHILSYCRKDVLNLFEQKFYYTSKRKESNNMKNESLLRLINYNRYYNKIDSNNYYNGGKILSNDRQYIYSPLCEYKKKINDISSYVSVPFKINIRNLGTSNFVNNKKDVLDNDYIYENIKKEKSKHKKIIFLLFVSLFGLYGFFESYNPEFFLYDIFLKFCLKYIDGEICHDLFLLLGKYNILPYDTSNDSIYACTNIKHLDFINPFGVAAGFDKNGVCIDSILKLGFSFIEIGTITPRGQTGNAKPRIFRDVESRSIINSCGFNNMGCDKVTENLILFRKRQEEDKLLSKHIVGVSIGKNKDTVNIVDDLKYCINKIGRYADYIAINVSSPNTPGLRDNQEAGKLKNIILSVKEEIDNLEKNNIMNDESTYNEDNKIVEKKNNF…	569	1	null	no	GO_0005737	GO_0005743	GO_0005737,GO_0005743	0	0	0	0	0	0	0	0	0	0	0	0	0	0	0	0	0	0	0	0	0	0	0	0	0	0	0	0	0	0	0	0	1	0	0	0	1
853	PF3D7_0502200	protein Mpv17, putative	MPV17	ATGTTTATTAATGCTTATATGGACATAAAAAGAAAACATATAAAAATTATAGCAAAAAATGTGAACTCTTCCTATTTAGATTATTATTTTAAAAGATGGTATGTCACGGATATATATAACAACTTAAAATTACCAGATAAAATTAGATACAAACTAAATAATAATTCATTTTACCTTAATACTTTTAATACATTAAACGAATTGAAAAAAGACGACCTAAAAAACAAAAATTTCCAAACATATACTAAAATTAATAATAATAAACAAAATGTTATAAATAACGAAAATGCTTATTATTATAACATTGACAATTGTTTAAAATATAATCAATATCAAATAAATAAGGAAAAAACAGAACAACATATACATAACAGTAATTGTGATTATATGAATAAAAAT…	MFINAYMDIKRKHIKIIAKNVNSSYLDYYFKRWYVTDIYNNLKLPDKIRYKLNNNSFYLNTFNTLNELKKDDLKNKNFQTYTKINNNKQNVINNENAYYYNIDNCLKYNQYQINKEKTEQHIHNSNCDYMNKNNSIYYIKNDQNNPINHKKINSYTNNINRYANCIFNNIGNNNSNKKYLYQIQIKNNVCTLHNIKYSRYDKRNVYPSKNVQNVYSNNKKIQEKKNFPHIETNINLDDVARDMKYATKYPKKKGFLSYIFVRKLSLFMNNLFEKHLLLMNCIIAGTLYFIADLTCQMMEVHKNNNDVEYDFLRTLRMALIGLTLEGPIMTWWYGKILANFIKSKPNTFLYKSFIPTLFDNFIFGPIHLTIFFFYNGILKNQRKSEIIDKIVNTGMKVFF…	443	5	null	no	GO_0016021	GO_0005743	GO_0016021,GO_0005743	0	0	0	0	0	0	0	0	0	0	0	0	0	0	0	0	0	0	0	0	0	0	0	0	0	0	0	0	0	0	0	0	0	0	0	0	1
4924	PF3D7_1435000	cytochrome c oxidase assembly protein COX15, putative	COX15	ATGGGATTTAATAAGATTTTTCCTAATATATTTGTAGGTAATATATTAAAGCATGGGTATAAGAAAAGGTTAATCTATATAGATAAAAGAAGGTTCAATACCTTTAACAAATTAAGTAGATCGGAGGAATCTTACGTTATAAGGAAGGCAGAAAAATGTATGAACTATGTTAAAGAGGGATATGAATTAAAGGTTGGTATGTGGTTAAGTACATGTAGTTTATTAATATTAGGGATGATAAGTATAGGTGGATATACAAGATTAACAGAGAGTGGTTTATCGATAACTCATTGGAAATTTCGTGGTATAAAATACCCAAGAAATGAAGAAGCATGGATTAAAGAATTTGATAAATATAAAAATACACCTGAATATAAGGAGGTACATTATAATATGACA…	MGFNKIFPNIFVGNILKHGYKKRLIYIDKRRFNTFNKLSRSEESYVIRKAEKCMNYVKEGYELKVGMWLSTCSLLILGMISIGGYTRLTESGLSITHWKFRGIKYPRNEEAWIKEFDKYKNTPEYKEVHYNMTLDEYKKIFFNEWLHRTFGRAIGLFFLSGASFFLYKNALKKNMIKKLSLVFLLGGFQGVVGWWMVKSGFDKPTTENKTPRVSPYRLVFHLFCASAMYSYIFLNSLTLIELGKMRKLFAKSQIPTWPEFLRNELMHEMYEKRNVTKNMKFGIFAFTLLVLSNIMYGGFVAGNDAGYAYNTWPKMIDKFVPDDVMNFIKSKKKKYSQLFENTAIVQFNHRMLGYLIVLNSFLLYYYSKSLALSKKTKRLFSLLPLITTTQLITGIHVLV…	430	8	null	no	GO_0016021	GO_0005743	GO_0016021,GO_0005743	0	0	0	0	0	0	0	0	0	0	0	0	0	0	0	0	0	0	0	0	0	0	0	0	0	0	0	0	0	0	0	0	0	0	0	0	1
3393	PF3D7_1203600	cytochrome c1 heme lyase, putative	CC1HL	ATGAATGAACAAAAAAAAGAAAATATAAATATTAAAAATATTAGTAATCATAATAATTCAGATGGAAAAGAAAAGTCTTCCATTCCGTCAAAAAATGGGAGTTGGTACTATCCATCCCAGAAACAATTTTATAACACAACAAAAAAAAAAGGTTACTCCTTCTCTCAAGAAGATTTAAATATGGCCTTAAAAATTCACAATGCTGTCAATGAAGAAACATGGAATAAAATTATGAAAAAAGAACAAAAATATTTCGACATATGTAAAGAACAAAAATTAATAAAGTTCGTAGGATATCCTACGAAACTATCTATTAAAGCTTTTATGTTAACACTCATAGGTTATAACAAACCTTTTGATAGACATGAGTGGTACATAGACAGATGTGGAAATACAATC…	MNEQKKENINIKNISNHNNSDGKEKSSIPSKNGSWYYPSQKQFYNTTKKKGYSFSQEDLNMALKIHNAVNEETWNKIMKKEQKYFDICKEQKLIKFVGYPTKLSIKAFMLTLIGYNKPFDRHEWYIDRCGNTIKYIIDYYDGKKEKNSAVSIYIDARPQLNHQNAIDNVKIIYIKICRFLNNLF	184	0	null	no	GO_0005739	GO_0005743, GO_0005739	GO_0005739,GO_0005743,GO_0005739	0	0	0	0	0	0	0	0	0	0	0	0	0	0	0	0	0	0	0	0	0	0	0	0	0	0	0	0	0	0	0	0	0	1	0	0	1
3594	PF3D7_1224600	cytochrome c heme lyase, putative	CCHL	ATGCAGAATTTAAGTCCAGCATGTACTTTCAATAAAAATGAAGAAAAGATAAAATGCCCATCTTCAACAAAATTGGGATGTTCAGATGGAACGAAAATTATACAACATGAAATTAACGAAAGAAATATGATGCCCGAGATTCCCAATGTCTCCTTAACAGATGAAAATGATTTTACATTTAATAAAAAAAGACACGTATCTTCAATTCCAAAAAATAATAACGAATATTGGGTTTATCCTTCATCTCAACAATTTTATAATTCATTAATAAGAAAAAATAAAGATATAGATAAGAATTATATTGATGCTGTGGTAAGTGTTCACAATGAAGTTAATGAAGAATCATGGAAACAAATTCTTAAATATGAGCATATGCATAAAAGGAGTTGCACAGATGTA…	MQNLSPACTFNKNEEKIKCPSSTKLGCSDGTKIIQHEINERNMMPEIPNVSLTDENDFTFNKKRHVSSIPKNNNEYWVYPSSQQFYNSLIRKNKDIDKNYIDAVVSVHNEVNEESWKQILKYEHMHKRSCTDVTLHRFLGKFDDLSIKARFRSIFSSMGRPFDRHDWYVNRCGTQVKYILDYYNDESINDDKNIYIDVRPAMNSFSNVWDRLRYPFYEFYFKYVKKDELFK	231	0	null	no	GO_0005739	GO_0005743, GO_0005739	GO_0005739,GO_0005743,GO_0005739	0	0	0	0	0	0	0	0	0	0	0	0	0	0	0	0	0	0	0	0	0	0	0	0	0	0	0	0	0	0	0	0	0	1	0	0	1
4967	PF3D7_1439400	cytochrome b-c1 complex subunit Rieske, putative	null	ATGAATAATATTAAATATGTGGAACTTTTTTACAAATGCAAAATATTTCGAAAAAATGGATTGAATAGAATAATTAGAAGAAATGGTGGTACATTTAATCATAACATAAAAGAAAATGAACGTATTCCTCCTGCATCTGAAGATCCAAGTTATAAAAATTTATTTGATCATGCAGAAGATATAAAATTATGGGAAATTGAAGAAAAACAAAATGTGTCTCATAAAAAAGTTGAAGATTTATCAGAATTAGTTGAACCGTCAAATCATCCACATCAATATGAAGGTATTTTTGCAAGAACAAGATATGCTCATTATAATCAAACAGCTGAGCCTGTATTTCCAAGAAAACCGGATCTAGAGAAAGGTGAATTGGCTAGCGGAGCAAATGTAACAAGAACT…	MNNIKYVELFYKCKIFRKNGLNRIIRRNGGTFNHNIKENERIPPASEDPSYKNLFDHAEDIKLWEIEEKQNVSHKKVEDLSELVEPSNHPHQYEGIFARTRYAHYNQTAEPVFPRKPDLEKGELASGANVTRTDVWHNPKEPAIVSIGKFEPRNFRPAGYAENCPNPESINSDHHPDFREYRLRSGNEDRRSFMYFISASYFFIMSSIMRSAICKSVHFFWISKDLVAGGTTELDMRTVNPGEHVVIKWRGKPVFVKHRTPEDIQRAKEDDKLIQTMRDPQLDSDRTIKPEWLVNIGICTHLGCVPAQGGNYSGYFCPCHGSHYDNSGRIRQGPAPSNLEVPPYEFVDENTIKIG	355	0	null	no	GO_0016020	GO_0005750, GO_0005739	GO_0016020,GO_0005750,GO_0005739	0	0	0	0	0	0	0	0	0	0	0	0	0	0	0	0	0	0	0	0	0	0	0	0	0	0	0	0	0	0	0	0	0	1	0	0	0
4883	PF3D7_1430900	cytochrome c oxidase subunit 2, putative	COX2	ATGGATAAGATTAAAAGTTGGTTAGGATTTAATAAAAAGATCGTTTTTACAGAAAATAAATTTTTATTAAGAAATGTAAATGACCAAGAAAGTTTACAAGCAGAAAATGTAAGAGCAGAAGATTATCCAATACCTGAGAAATATTTAGAGGATCCAGATAAAATACCAAAGTATTACGTTTTTCAATCAAATATGGTAACAGATGAAGATTTACAACCTGGTATGTTAAGACAATTAGAAGTTGATAAAAGATTAACATTGCCTACAAGAACACATATATCTTTTCTAGTAACAGCTACTGATGTTATACATTCATGGTCTATTCCTAGTTTAGGAATAAAAGCTGATGCTATTCCGGGGCGCTTACATAAAATTACAACTTTTATATTAAGAGAAGGG…	MDKIKSWLGFNKKIVFTENKFLLRNVNDQESLQAENVRAEDYPIPEKYLEDPDKIPKYYVFQSNMVTDEDLQPGMLRQLEVDKRLTLPTRTHISFLVTATDVIHSWSIPSLGIKADAIPGRLHKITTFILREGVYYGQCSEMCGTLHGFMPIVVEAVSPEAYAAHAKKYYKE	172	0	null	no	GO_0016020	GO_0005751, GO_0005739	GO_0016020,GO_0005751,GO_0005739	0	0	0	0	0	0	0	0	0	0	0	0	0	0	0	0	0	0	0	0	0	0	0	0	0	0	0	0	0	0	0	0	0	1	0	0	0
53	PF3D7_0106100	V-type proton ATPase subunit C, putative	null	ATGAGTGAAATTCCCATGTGTTTGTTCATAGCTTGTTCAACACGAGATAATACAAGCCGTGAATATATTTATACTATATTGAAGAATCGTCTTTTAGGTAGTCATATATGTATAGATACGAATATATTGGATGTGCCTACGAATATAAAATTTTGTTCATTTGATGATTTATTAAAGTGTGCTGATGATTTACAGAAATATGATAGTTACGCATATGGTTGTTTAAAAAAGATAGAAAAAATAGCAAAAGAATATGATGAAAATATTGAATTGAAAATAATATATCAACGTCAACATATAAATATAGATCAATATATAAGAAGATTTACTTGGGATGATGCAAAATATCCAAGGAGTAGATCTTTAACGGATACTATTGATGTTATGATAAATAATATT…	MSEIPMCLFIACSTRDNTSREYIYTILKNRLLGSHICIDTNILDVPTNIKFCSFDDLLKCADDLQKYDSYAYGCLKKIEKIAKEYDENIELKIIYQRQHINIDQYIRRFTWDDAKYPRSRSLTDTIDVMINNITKLSDEIQIKSSMLNDLKEKKKKEVPKNDSNNFFLRNLNEILTPQTVSETDFIETEYLTTLIAYVPKNSIDDWLNNYEKFSSYVVPRSTEQFKDLIDKDGNTLWKVFVFKKFAEDFKKEAKVKKFVVKSFKYDEKQYNDMMESRTKVEAEIIRQETFLRRMCLAAFSDIFIAFIHINILRVFCESVLRFGVPPNFASFSIRINGESKEKKVRKKLYDIFSSSDSIGKNYIKRSDENDEEIYPYVSVSFKI	383	0	null	no	GO_0033180	GO_0005753	GO_0033180,GO_0005753	0	0	0	0	0	0	0	0	0	0	0	0	0	0	0	0	0	0	0	0	0	0	0	0	0	0	0	0	0	0	0	0	0	0	0	0	0
3996	PF3D7_1311300	ATP synthase subunit gamma, mitochondrial	null	ATGCTAAAACCTAATTTCAGTAGTTTTATGACGAGATGTTCCATGTTATCATGGAATACAGTTGAGAAGAAAAAGTTTGCTAGCGATAATTTAAGGTCTTTATCCTTACGAATAAAATCTGTTAAATCAATTCAAAAAATAACCAAAGCTATGAAGATGGTTGCTGCATCAAAATTTAAAGGAGATCAAAGAAGACTAGAAAAGTGCAGTAATTTTTCTACCCCTTTAGTTGATGTGTTTAATAGATTAAATAAATTAGATATACATAAAAAGAACGAAGAACTAGCTATTATAGCAATTTCTTCAGATAAAGGATTATGTGGTAGTGTAAATTCATCAGTATCAAGATTATGTAAAAAATTATTAGAAAATGAACAAGTTAATAATGAACTTGTTGAT…	MLKPNFSSFMTRCSMLSWNTVEKKKFASDNLRSLSLRIKSVKSIQKITKAMKMVAASKFKGDQRRLEKCSNFSTPLVDVFNRLNKLDIHKKNEELAIIAISSDKGLCGSVNSSVSRLCKKLLENEQVNNELVDNITPNKIYLYGIGEKIRSALSRLHKDKFQVIYNEYNKIPINFLTCSYIAERIMNNNHSNIIIIYNHFKSAISFDTQILSVFSQKQLNKINKKELTHFEFEPEMDYIFKDIYQFYFTSILYNSIIQNLASEQSARMTAMDNASSSATDMLNALSLRYNRARQSKITLELIEIISGANAL	311	0	null	no	GO_0045261	GO_0005754, GO_0005739	GO_0045261,GO_0005754,GO_0005739	0	0	0	0	0	0	0	0	0	0	0	0	0	0	0	0	0	0	0	0	0	0	0	0	0	0	0	0	0	0	0	0	0	1	0	0	0
1598	PF3D7_0715500	ATP synthase subunit epsilon, mitochondrial, putative	null	ATGTGGAAAGCAGCCAATGTTTCTTATACCAGATATGCTTCAGAAATGGCAGATATTTTAAGGAAATGTTTGAAGGACCCATATTCCGATATAGCCTTAGAACGAAGTAAAATGCATATAAGGGAAACAATTTATAAGGATGGTAAACCAGTAAGCCAAGAATTGTATGAAGAATTTGAAAAGGCTTACAAGAACTTATCTAGACAGAAAGAATAA	MWKAANVSYTRYASEMADILRKCLKDPYSDIALERSKMHIRETIYKDGKPVSQELYEEFEKAYKNLSRQKE	71	0	null	no	GO_0000275	GO_0005756, GO_0005739	GO_0000275,GO_0005756,GO_0005739	0	0	0	0	0	0	0	1	0	0	0	0	0	0	0	0	0	0	0	0	0	0	0	0	0	0	0	0	0	0	0	0	0	1	0	0	0
4990	PF3D7_1441700	mitochondrial inner membrane protease ATP23, putative	ATP23	ATGGAAGAAATTTCTAAAAAGTTGGAAGAATTAAAAGAAAATATAAGAAGGTTTAATCATGAAAATAAAATATTCGATTTAATAAAAAATGTAGAGAATTATTTTTTTAGTAATAAACCGAATCAAAAGGACAATTTGAATGATATGTTATTTTTAATACAATATTCTTTAAAATATAAGGGCATATGTAAATGGCCAAATTATAGTAACTTATTTGTAATAAATTATAATTTAAATGAAAATTTTAAAAGCATGGTACAAAATAATAAAGAGTTTTTTGAAGAGTATGTAAAAATGAATATTAATAAATATAATACAAAAAATAAAGAGGAAAATATTAATCGTGATGACAATAAGAATCATACGAAGTATATGGATAGCAAGGAAAATATGTTAAAT…	MEEISKKLEELKENIRRFNHENKIFDLIKNVENYFFSNKPNQKDNLNDMLFLIQYSLKYKGICKWPNYSNLFVINYNLNENFKSMVQNNKEFFEEYVKMNINKYNTKNKEENINRDDNKNHTKYMDSKENMLNNDHNNNNINNNNNNLFTKNDIELNEDNMKKKIKEHNQISNNDYKKMERKINTYFNDDISLFNKIKLQIFMYMILNNYRIKILVNSLSALNRPINVIYINCPNNKDQKKKIYEKFTNFFSSYNKFNNTYINNTKKNNYQGIIKDDNCSCSELSSLNQNIKTINNNSYNKKSDKYVGGYNPINNTIWLCSNNITNYYKLKYILTHELIHAFDFARANIDMYNCKHIACSEIRAYNLSNQCNYFNSKYFVGHKDVFNSSKSSVIENTSK…	458	0	null	no	GO_0005743, GO_0005739	GO_0005758	GO_0005743,GO_0005739,GO_0005758	0	0	0	0	0	0	0	0	0	0	0	0	0	0	0	0	0	0	0	0	0	0	0	0	0	0	0	0	0	0	0	0	0	1	0	0	1
2949	PF3D7_1108500	succinyl-CoA synthetase alpha subunit, putative	null	ATGAAATATTCTAATATGAAAAAGTTATCTTTTCCCTTGAAGGAAAGATATTTCTCAGCAACCAGTAAAGTGTTCATAGATAAAAATACAACAGTAATATGTCAAGGAATTACTGGAAAACAGGGTACTTTCCATACAACCGAAGCCTTAAAGTATGGAACAAAAATGGTAGGTGGAGTAAACCCAAGGAAGAAAGGCACAACATGGACCAGTTATGATAATAAATACACCTTACCTGTTTTTGGTACAATTCTTGAAGCAAAAGAAAACACGAATTGTTATGCATCCGTTTTATATGTCCCCCCAGAGCATGCAAAGAGTGCAATGATTGAATCAATTGAAGCTGAAATTCCATTAATTGTATGTATAACTGAAGGAATATGCCAGCATGATATGCTT…	MKYSNMKKLSFPLKERYFSATSKVFIDKNTTVICQGITGKQGTFHTTEALKYGTKMVGGVNPRKKGTTWTSYDNKYTLPVFGTILEAKENTNCYASVLYVPPEHAKSAMIESIEAEIPLIVCITEGICQHDMLEVKSCLKMSKKTTLIGPNCPGIIKPGECKIGIMPSHIHKKGCVGIVSRSGTLTYEGVNQTTKVGLGQSTCIGIGGDPFHGTNFLDCIKLFLEDDQTECILLIGEIGGDSEEQVAQWLIQNNVDNGKRKKKPVFAFIAGKCAPPGKRMGHAGALISGGKGTADGKIEALQNAGVHVILNPTKMGEDIYAVMQTLK	327	0	null	no	GO_0016020	GO_0005759, GO_0005739, GO_0045244	GO_0016020,GO_0005759,GO_0005739,GO_0045244	0	0	0	0	0	0	0	0	0	0	0	0	0	0	0	0	0	0	0	0	0	0	0	0	0	0	0	0	0	0	0	0	0	1	0	0	0
1051	PF3D7_0522500	50S ribosomal protein L17, apicoplast, putative	RPL17	ATGAAGATATGGATATTATTTTTTTTGTTTTGTAAGAGCGTGTTGAATTTTAAATTGAAACAAAATGTGTCAAATATTTATATAATGAATAGAGAGCCCTTAAAATATATATCAAATAAAAGAAATACTTCATTATTGGCACATACAAATAAAAATTTCAGGAAATTAGGAAGGGATAGAGCTCAAAGGAGAGCTCTTCTAAGGGCATTAACAACTAGTTTACTGAGGTATGGTAAAATAGTAACGACTGAAGCAAAAGCAAAGGAGACTAGAAGAAAAGTTGATAGAATAATAACATATGCTAAAAAGCATGATAACAATAGGCAGTACGCTTATAGATTGATAGCTAATTATGTTTATGATAGAGAATTGGCCCTTAACGTAGTTAAACAGGCCCCT…	MKIWILFFLFCKSVLNFKLKQNVSNIYIMNREPLKYISNKRNTSLLAHTNKNFRKLGRDRAQRRALLRALTTSLLRYGKIVTTEAKAKETRRKVDRIITYAKKHDNNRQYAYRLIANYVYDRELALNVVKQAPVRYKERHGGYTKIKLLPKSRKGDASRMAMLELL	166	0	HMM: MKIWILFFLFCKSV, NN: MKIWILFFLFCKSVLNF	yes	GO_0005622, GO_0005840	GO_0005762	GO_0005622,GO_0005840,GO_0005762	0	0	0	0	0	0	0	0	0	0	0	0	0	0	0	0	0	0	0	1	0	0	0	0	0	0	0	0	0	0	0	0	0	0	0	0	0
3794	PF3D7_1245400	50S ribosomal protein L3, mitochondrial, putative	null	ATGATTTTTTCGAGGTATCCCCTTATTTGTGGTAATAAAAAAAAAATAGAGGATGGATTTTTTTATTTTATAAAGAATGAGAAAAAGGGTTTTTATGCCTCAAAATGGATACGTAGATTACAATTATTAAATGAAAAATATAATTATAAGATAGATAAAGAAGAAGAAGAAATAGAATATGAAGAGAAGAAAGAGGATGATAATATAAAAAAAGTATATCCTTTATGGAATAGTAGAAGATCAGGATTATTAGGTTATAAAGTTGGATGTATGAGTATATGGGATGTATGGGGTGTTAAGCATGCTGTTACGGTTGTTAAGATAGATAATTGTTATGTAATTAATCAAAAAACTATAAGTAAAAATGGATATGAAGCTTTAGAGCTTGGAGTTGGTAAT…	MIFSRYPLICGNKKKIEDGFFYFIKNEKKGFYASKWIRRLQLLNEKYNYKIDKEEEEIEYEEKKEDDNIKKVYPLWNSRRSGLLGYKVGCMSIWDVWGVKHAVTVVKIDNCYVINQKTISKNGYEALELGVGNMNVIKQSKNNIGNFIKRKLGFIHKIKEFKCTSDCFLPIHHKFSCRHFSPGQNLFISSGIKNKGFCGAMKKWNFSGKNKSHGTESKAHRSLGSVSMGKTINIVFRNKKMNTHIGEKSLVKCSNNKLFRINSLKNLLFIKGTIGGYKNKVIKISDAKGRSFNKFKNKIFLYYPTFIYKKNKKYKNVIDMPHSVEDPFLYNEIPLYDPPNK	341	0	null	no	GO_0005622, GO_0005840	GO_0005762	GO_0005622,GO_0005840,GO_0005762	0	0	0	0	0	0	0	0	0	0	0	0	0	0	0	0	0	0	0	1	0	0	0	0	0	0	0	0	0	0	0	0	0	0	0	0	0
1563	PF3D7_0710900	50S ribosomal protein L1, mitochondrial, putative	RPL1	ATGATGAGAAATTTTTTTTCTTCCTTAACAGGAATGTCTTTTCTAAAGTCTAATTCGAAGCATAATAATAACAAAGTGTTTTGGTTAATACAAAAAAGGGGACGTAAATATATTCCTTTTTATGATATAAATAAAAAGAAACAGAAAAAAAAAGGATTTAATAAAGTACATGAGAAAAAGAAAGAAGATGATGATAATGAAATTAATACGGAAAAAAGAGTAGAAAGAGATGTCGACAATATAGAATCAGAGAAATTAACACAAGGTGATAATATACAATTTGTGAATAGAAAAAAAGACTATGTATCTTCTACTTATTCTTTACGTTCTAATTTATTACCAGCATTGTCACCTATGAAAGGATTAAAATTGTTATTAAGTTTAAATGATAGTAATTAT…	MMRNFFSSLTGMSFLKSNSKHNNNKVFWLIQKRGRKYIPFYDINKKKQKKKGFNKVHEKKKEDDDNEINTEKRVERDVDNIESEKLTQGDNIQFVNRKKDYVSSTYSLRSNLLPALSPMKGLKLLLSLNDSNYFNMLKNDDSKINFNLIIKIDIKRESLRGMCNLVHSVDKNKKILVLVDEEHQNLKKYGADYVGLEYINKIKNGWLDFNICITNFKNINKILCIAKILGPKKLMPNIKSDTLVDNLEETIKKIKSGNTIEYRSEPIDLYTFQLYNEIYNFQQIDLNSIAHINVQIAPIDMNFYHILENMKCFTSEIIKNNIHSTHTQKENKTTAFTWPPITAKHKKQKINIEEKINLFHKNDDSSQSFILGGYITYGNYPKIFLRSNLLHPHSDGYSN	399	0	null	no	GO_0005739	GO_0005762	GO_0005739,GO_0005762	0	0	0	0	0	0	0	0	0	0	0	0	0	0	0	0	0	0	0	0	0	0	0	0	0	0	0	0	0	0	0	0	0	1	0	0	0
1138	PF3D7_0531200	ribosomal protein S16, mitochondrial, putative	null	ATGATAAGAAGATTATTCTTACCCTATTTTTCAAAGGATAAAGGGCCCCCAAGAATTCGATGTCAAGTTAATGGGGTAAAAAGAAAACGTTTTTTTAAAATAGTTGTAGCAAATCAAAAAGATAAAAAAAATGGAAAACACATAGAAGTGTTAGGTACATATGTAAATAAAAATAATATTAGAGAAAAGTTGAATAGATATAATATTACTAATCCAAGTAATGATTCTTATTATAATAATATAGAAAATATTAAAGAAATTCGATTACGATTTAATCGGGTCAAATTTTGGCTAGCTGCCAATTGTAACTTTAGTGATCATATGAAATATGTATTAAGTTTATGCAAAATTATACCTCAATATCCAATAAAATATAGTAGAAGATGTTCAGATAAATAT…	MIRRLFLPYFSKDKGPPRIRCQVNGVKRKRFFKIVVANQKDKKNGKHIEVLGTYVNKNNIREKLNRYNITNPSNDSYYNNIENIKEIRLRFNRVKFWLAANCNFSDHMKYVLSLCKIIPQYPIKYSRRCSDKYYHKYNEIINKHKLIQADKINNFLKTDLNIQYKNDFETSKNEPNNKDEYIYTPEELTYLKKLSKNRILEFEDKDKIRKIIR	213	0	null	no	GO_0005622, GO_0005840	GO_0005763	GO_0005622,GO_0005840,GO_0005763	0	0	0	0	0	0	0	0	0	0	0	0	0	0	0	0	0	0	0	1	0	0	0	0	0	0	0	0	0	0	0	0	0	0	0	0	0
1626	PF3D7_0718400	mitochondrial ribosomal protein S8 precursor, putative	null	ATGCAGAGAGCATGTGAAATGGTTGTATCTTTATTACGAACAGATTCCATGACTCAAAAATGTCCATTCCATGTTTTGAATGTTCAAATTTTGGAATTATTACAAAAAGAAGGACTTATCAGAGGTTTCTCTATTAAAGGCACAAAAATAGATATACTACTAAAGCATTATAAAGGAGCACCAGTCATTAGAAATATCCGAGTTGTTTCAAAACCTAGTCGAGATATTTGGTTAACTCCTCATGAACTTAAATTTCGGACGAGATTTAACACGGGCCTTTGGGTTATGCAAACTAGCTGTGGTGTTATCAGTCATAGGGATTGTGTTCGCATGGGAATCGGAGGGAAAATGTTATTTGCTGTAAATAATGGATATCAACATTTTTGTTAA	MQRACEMVVSLLRTDSMTQKCPFHVLNVQILELLQKEGLIRGFSIKGTKIDILLKHYKGAPVIRNIRVVSKPSRDIWLTPHELKFRTRFNTGLWVMQTSCGVISHRDCVRMGIGGKMLFAVNNGYQHFC	129	0	null	no	GO_0005840	GO_0005763	GO_0005840,GO_0005763	0	0	0	0	0	0	0	0	0	0	0	0	0	0	0	0	0	0	0	0	0	0	0	0	0	0	0	0	0	0	0	0	0	0	0	0	0
2108	PF3D7_0903200	ras-related protein RAB7	RAB7	ATGTCAAATAAAAAAAGAACCATATTAAAAGTTATAATTCTTGGAGATAGTGGTGTTGGTAAAACATCATTAATGAATCAATATGTGAATAAAAAATTTACGAATCAGTACAAAGCAACGATTGGTGCCGACTTTTTAACTAAAGAAACTATAGTTGACAATGAACAAATAACTATGCAGATATGGGATACTGCAGGACAAGAACGTTTTCAAAGTTTAGGAGTAGCTTTTTATAGAGGTGCAGATTGTTGTGTTTTAGTATTCGATTTGACAAACTACAAAACTTATGAATCTTTGGAATCGTGGAAAGATGAATTTTTAATTCAAGCTAGTCCAAAAGATCCTGAAAATTTTCCTTTTGTTATTATTGGAAATAAAGTTGATGAAACAAATAAAAGA…	MSNKKRTILKVIILGDSGVGKTSLMNQYVNKKFTNQYKATIGADFLTKETIVDNEQITMQIWDTAGQERFQSLGVAFYRGADCCVLVFDLTNYKTYESLESWKDEFLIQASPKDPENFPFVIIGNKVDETNKRKVQSLKVLQWCKSNNNIPYFETSAKNAINVDQAFDEIARKAMKQEHQEEQIYLPETFALNNQSEQKMYKSRCC	206	0	null	no	GO_0005622, GO_0016020	GO_0005768	GO_0005622,GO_0016020,GO_0005768	0	0	0	0	0	0	0	0	0	0	0	0	0	0	0	0	0	0	0	1	0	0	0	0	0	0	0	0	0	0	0	0	0	0	0	0	0
245	PF3D7_0211200	ras-related protein Rab-5A	RAB5a	ATGGAAAAGAAAAGTAGTTATAAAACAGTTTTATTAGGAGAATCATCAGTAGGAAAATCAAGTATAGTTTTACGATTAACAAAAGATACTTTTCATGAGAATACTAACACAACAATAGGTGCATCTTTTTGTACATATGTAGTAAATTTAAATGATATAAATATAAAGAATAATAGTAATAATGAAAAAAATAATAATATAAATTCAATAAATGATGATAATAATGTTATTATAACAAATCAACATAATAATTATAATGAAAACTTATGTAATATAAAATTTGATATATGGGATACAGCTGGACAAGAAAGATATGCAAGTATTGTCCCACTATATTATAGAGGTGCTACTTGTGCTATAGTAGTTTTTGATATTAGCAATTCAAATACTTTAGATCGA…	MEKKSSYKTVLLGESSVGKSSIVLRLTKDTFHENTNTTIGASFCTYVVNLNDINIKNNSNNEKNNNINSINDDNNVIITNQHNNYNENLCNIKFDIWDTAGQERYASIVPLYYRGATCAIVVFDISNSNTLDRAKTWVNQLKISSNYIIILVANKIDKNKFQVDILEVQKYAQDNNLLFIQTSAKTGTNIKNIFYMLAEEIYKNIINNNNTSKNKTVNKNLINLDNQTLSKKGCC	235	0	null	no	GO_0005622, GO_0016020	GO_0005768, GO_0016020	GO_0005622,GO_0016020,GO_0005768,GO_0016020	0	0	0	0	0	0	0	0	0	0	0	0	0	0	0	0	0	0	0	1	0	0	0	0	0	0	0	0	0	0	0	0	0	0	0	0	0
5051	PF3D7_1447900	multidrug resistance protein 2	MDR2	ATGGATGTATCAAATTACGAGTATTTAAGATCCTATGGAATTAAGAACGAACTGAAAAGGAAAAGAACGCACAAGAAGATAATAATATATCACTTATTAGATATTATAATATTTTTCTTATTATTTTTTAGTTGTTACAATTTTAATTTAGAATTATGTTATAAATATGAAAAGGCAATTTTTTATAATTTTTTTAAATCATCAGTTGATTTATTTTTGTTGAATGTTATAAGAATAATATACACCGTAATTTTATTTAGATTACATAAAAAGTTAACAGAATTGAATACATTAGGAAAGGTGTATGTATTATCCAGACATATAACCGGTATCTTAGTTATATTGAATGTAATAAAGATGATAAATTATAGTTATGTAATAAAATCAGAAAATCCTCTT…	MDVSNYEYLRSYGIKNELKRKRTHKKIIIYHLLDIIIFFLLFFSCYNFNLELCYKYEKAIFYNFFKSSVDLFLLNVIRIIYTVILFRLHKKLTELNTLGKVYVLSRHITGILVILNVIKMINYSYVIKSENPLYNTNMYLITLKVLFMVYSMISSIYYYFIQFKLYNIKKKYIIARVELEKILINDIKSKKYNIYKSDENSGLLGTDSNSTIMNNEYLNLDYKNLLDMNISYNKLNEKINNDIINNTSDVQEKNMDYNDIHNFQKKKKSSNFAYLNFFHKESKDNKIDVKESFLNKRYGSNKRSSKIYDNNNNNNNNNINSKIDYLENNITYTEFKKILLPYLWPSKRIDMKGNSSILRTYIVLIFLFILVSKVFSVISPIYLGWASNEVLKKSLSSSV…	1024	10	null	no	GO_0016021	GO_0005773	GO_0016021,GO_0005773	0	0	0	0	0	0	0	0	0	0	0	0	0	0	0	0	0	0	0	0	0	0	0	0	0	0	0	0	0	0	0	0	0	0	0	0	0
3100	PF3D7_1124000	endoplasmic reticulum oxidoreductin, putative	ERO1	ATGAAAATTTGCTTAATACCAGTATTTTTATCCTTAATAATATATGTTATTTTATTTTTAAAAGGGAAGAAAATAGGTGATTTATATATTACTGAGCATTTAAGAAATAAGTTTGAAAATATTTTATTGTATTTTAATATTTTTGAAGTACAATACCCTGAAAGTTATTTAAATAATGAAAAATTATTAGGATTACATGTAAGGGATATTGAAAAAGATGCATACAGAGCATATCCTATATTAAAAGAATTAAAACAAAAAGATTATTTTAGAATATTCAAAGTTAATTTACATTTATCATGTAAAGTATTTTTAAAAGGTAATGAAAAATGTAAAGAAATAAAAAAATGTAGTGTTTGTGAATGTGAACAAGATGAAATACCATATAATTTTAGAACT…	MKICLIPVFLSLIIYVILFLKGKKIGDLYITEHLRNKFENILLYFNIFEVQYPESYLNNEKLLGLHVRDIEKDAYRAYPILKELKQKDYFRIFKVNLHLSCKVFLKGNEKCKEIKKCSVCECEQDEIPYNFRTNEIEIIENKMTNEDLKKTFIESKLYKDILGIYAPSNEGFISYVDLVYNSPSFTAYEGRNIWNMIYKENCFQNEKSECEEMNSFYKIISGMQSNIAVLSSEYFYLKNDFLFGEIQINNKFNNDYFKNLNYDYSVTFFKEKIGLYPERIENLYFTFAILLRSMCRLKSLFKQCKCNSGYEQNDKEAVRLLDDLLENFYHSCSSKEFLEPLFPQHGKDILSKFMNITNILDCVPCVKCRLHGKLKTTALQIALVEGVSDEHIGSLERNE…	465	2	HMM: MKICLIPVFLSLIIYVILFLKGK, NN: MKICLIPVFLSLIIYVILFLKGK	yes	GO_0005783	GO_0005783	GO_0005783,GO_0005783	0	0	0	0	0	0	0	0	0	0	0	0	0	0	0	0	0	0	0	0	0	0	0	0	0	0	0	0	0	0	0	0	0	0	0	0	0
2790	PF3D7_1032400	phosphatidylinositol N-acetylglucosaminyltransferase subunit A, putative	PIGA	ATGGAAAGTGCAGTTAGCGAATGCAATATATACAAAAAGGAAAAAGATAAAAATATAATTTACAAACAAGAAAGAAAATGTTGTATTTGCATGGTGAGTGATTTTTTTTATCCAAATTTGGGAGGAATAGAAACTCACATTTTTGAATTGTCTAAGAATTTGATAAAAAAGGGTTTCAAGGTTATAGTTGTAACAAATTTTAATAATAATAGGCATGGTATAAGATGGATGGGTAATGGTATTAAGGTTTATTATTTGCCCTTCCAGCCTTTTTTAGATGTAGTGAGTTTTCCAAATATTATAGGGACTTTACCACTATGTAGAAATATATTATATAGGGAAAAAGTCGACATAGTACATGGTCACCAGGCTACGTCAGCATTAGCTCATCAATTCATT…	MESAVSECNIYKKEKDKNIIYKQERKCCICMVSDFFYPNLGGIETHIFELSKNLIKKGFKVIVVTNFNNNRHGIRWMGNGIKVYYLPFQPFLDVVSFPNIIGTLPLCRNILYREKVDIVHGHQATSALAHQFILHAKTLGIKTIYTDHSLYSFSDKGCIHVNKLLKYCINDVDHSICVSHTNRENLVLRTESNPYKTSVIGNALDTTKFVPCISKRPKFPRINIIVISRLTYRKGIDLIVKVIPLVCQKYPFIKFIIGGEGPKRLLLEEMREKYHLHNSVVLLGKVKQENVKNILQTGHIFLNTSLTEAFCIAIIEAASCGLLVISTDVGGISEVLPHDMMILAKPNHIELCKAVDKALKIVQKVDSNLFHERLTKMYSWEKVAEKTEKVYMNVLNYAN…	461	1	null	no	GO_0016020	GO_0005783	GO_0016020,GO_0005783	0	0	0	0	0	0	0	0	0	0	0	0	0	0	0	0	0	0	0	0	0	0	0	0	0	0	0	0	0	0	0	0	0	0	0	0	0
4634	PF3D7_1404900	conserved Plasmodium protein, unknown function	null	ATGTTGAGTGTTAACAAAGTTACCGCTTTATTATTTTTCTATATTTTACTCATAAAAGGATATTATGGAAGGACCGAAAGTAAAAATATATTAAACACTGTAAAGAATGATGTAAAAAATGGGAATTATCAGAATATGATGAATTTTCCAGATATGGATAAAATAAAAGAATTAATAAATCAGAATAAAGTTGAAGAAGCAAGAGAATTATTTAATGAAATGCAAAAACAATTTATGAAAGAAAAAATGGAAGCTAACAATAATATGAATAATAAAAAACCAGCAAAGAAAGCTATGGATAATAGTAATTTATTTAGTAATTTAATTAATCCTAATGATCTTCAAGAAATGATTAAATTTTATATGTACTTACAAAATATACTAAATTCCAAAAACGAA…	MLSVNKVTALLFFYILLIKGYYGRTESKNILNTVKNDVKNGNYQNMMNFPDMDKIKELINQNKVEEARELFNEMQKQFMKEKMEANNNMNNKKPAKKAMDNSNLFSNLINPNDLQEMIKFYMYLQNILNSKNETSEKKMVKSFLRKTIQKMKDNENSEEKKSIDDIIKDTEGHNEMLEKLAGLMKINKEKLKDEQVKNKLNQILIGMLKFIDYTNNSDITNSLMDEIQIEQVQAEDGTIKPKVQVNISNSKAHLDMLQKATNFMGINIDQEELKKLTVNNKWYESFLNNLLNSSDEL	297	0	HMM: MLSVNKVTALLFFYILLIKGYYGR, NN: MLSVNKVTALLFFYILLIKGYYGR	yes	GO_0016020, GO_0005739	GO_0005783	GO_0016020,GO_0005739,GO_0005783	0	0	0	0	0	0	0	0	0	0	0	0	0	0	0	0	0	0	0	0	0	0	0	0	0	0	0	0	0	0	0	0	0	1	0	0	0
2833	PF3D7_1036800	acetyl-CoA transporter, putative	ACT	ATGTTCAATCGTTTATTTGAAAATTTTGAATATAATTTTTTCATAAAAAGAAAGAAGTTAAAATATGATACGAAAGATGGACAATATGTGAAACAAAATATATCAAAAAGAAATAAGGACTATTATAATATAATATTCTTATTATCACTATATACTATACAAGGTGTACCAATTGGAGTTTCATCCGTAGTACCATTGATCATACAAGATAAAGTCAGCTATTCTCAATTGAGTATATTATCATTAGTTAGTATACCTTTCAGCATAAAATTATTATGGGCACCTATAGTTGATTCGGTATATAATAAAAGAATTGGAAGGAGGAAAAGTTGGATAATACCACTACAGCTATTTTGCAGTTTTACGATGATATATTTTAGTAATCATGTCAGTATTTGG…	MFNRLFENFEYNFFIKRKKLKYDTKDGQYVKQNISKRNKDYYNIIFLLSLYTIQGVPIGVSSVVPLIIQDKVSYSQLSILSLVSIPFSIKLLWAPIVDSVYNKRIGRRKSWIIPLQLFCSFTMIYFSNHVSIWLGEKDNIPNLFFLTLFFFLLFFLMATQDIAVDGWALTMLSEENKKAASTCNILGQNIGYCLSQLSFLTLNNKNICFYIFKKYIKFMYLIFNKSTYYRNVYEKLDLLYPSFQPFVDMKKFLKFWGTFILMLTIFTCFKKEMSDQNEEKNKLKNSNEMDNYNISEAQKCDDKMNNAKMNYPKKINNQIRTNEHIKINDIKQTNIQKQSSEINEFANAKDTYKTLYELLFLPPMKIFIILFLINRLPFASVEVGTNFKMLKRGITKEEF…	590	10	null	no	GO_0016021	GO_0005783	GO_0016021,GO_0005783	0	0	0	0	0	0	0	0	0	0	0	0	0	0	0	0	0	0	0	0	0	0	0	0	0	0	0	0	0	0	0	0	0	0	0	0	0
4189	PF3D7_1330400	ER lumen protein retaining receptor 1, putative, unspecified product	null	ATGAAGGGGGTTAATGATTTTTTTAGAAAAGTGAACGATGCAGAAAAAATGAAGAGATACCTGTCAGACCATAGCTCATCGATAAAAATATATTGTTTCTTTTTATTATTAGTTTTTATATTTTATCATTTATTTTCAGATGGAGATTTTTCGTTTTTATTAACTCTATCATCAGTAATTAGTATGTTTTCTTTTCTTATGGTCTTTTTAAAAATAGAAATGAACAAGTCATGTGCAGGTGTTTCATTAAAAATGATGGAGTGTTATGTAGTTTTAAATACATCAAGATTAATATCCATCGTACCATTTGAAGGATATTTACCATACGATAAAAGTGGAGATTGGCTATATCAATTAGTTGAAGCAGTTTCGCTATTTATTAATTGTTGTATTGTATAC…	MKGVNDFFRKVNDAEKMKRYLSDHSSSIKIYCFFLLLVFIFYHLFSDGDFSFLLTLSSVISMFSFLMVFLKIEMNKSCAGVSLKMMECYVVLNTSRLISIVPFEGYLPYDKSGDWLYQLVEAVSLFINCCIVYLCRYKYKNTYDSTNDIFNNLFLIIPAFVIAIFVHPSLNSFLPADVAWSFALYLESVCVLPQLSMFQKEGKVAAFTTHFLASQAFSKVLSFLFWIVSHKELNSSDNIIKSYVGFWVVIMQIVQLVLMGDFIYHYIRCLSKGVSFDNLLNENV	284	8	null	no	GO_0016021	GO_0005783	GO_0016021,GO_0005783	0	0	0	0	0	0	0	0	0	0	0	0	0	0	0	0	0	0	0	0	0	0	0	0	0	0	0	0	0	0	0	0	0	0	0	0	0
1426	PF3D7_0628300	choline/ethanolaminephosphotransferase, putative	CEPT	ATGGGGATTCTTTTTAAATTAAATAAAAGTGTTTATTCAAATTGTAAATCTTATGTTTATAAGAGTGGAGGGAATTCACTCCTTGACAATCTTTTTGATGCTTTCTGGAATATTTGTGTAAAATTCGTACCAAAGTCCATAACACCAAACCTCTTAACATTATTAGGATTCTTATGTTCAACAATTGCTTTTGTTCTTACATTTGTTTTTGATTCTCAAAATAAAAAATATGATTATATCTACATATATGCAGGAATCTTTTTATTCATATACCAAACATTTGATGCCCTTGATGGAAAACAAGCTAGAAAAACTAATACAAGTTCACCTTTGGGACAATTATTTGATCATGGATGTGATTCAATAACAACGTCCTTCTTTGTTTTTATTGCTTGCAAG…	MGILFKLNKSVYSNCKSYVYKSGGNSLLDNLFDAFWNICVKFVPKSITPNLLTLLGFLCSTIAFVLTFVFDSQNKKYDYIYIYAGIFLFIYQTFDALDGKQARKTNTSSPLGQLFDHGCDSITTSFFVFIACKAAGFPKSLIYYILLAIVQIQGYMFSWMEYHTKVFNTSVGKIGTTESHVLVITMCILRGLKGAGVFQRTTLKDILPKSISSVLCKCVLSVTMNYVILIPVIFFIILSISRCTYIGMQNAKKKKSEAIMQLAVVYIFSLMQYYFYYTNVTPKTELICFSIIALYSCFYNLFINLSTILKIKMDLIPVPVIFYYLSILLIFLKRNTKYKFLKHPLLKDSYILYYILFFGIIYLLDYAHTIITNICKELNITFIFNKKYKKK	391	8	null	no	GO_0016021, GO_0016020	GO_0005783	GO_0016021,GO_0016020,GO_0005783	0	0	0	0	0	0	0	0	0	0	0	0	0	0	0	0	0	0	0	0	0	0	0	0	0	0	0	0	0	0	0	0	0	0	0	0	0
4560	PF3D7_1369000	glycosylphosphatidylinositol anchor attachment 1 protein, putative	GPAA1	ATGGGATTTTCAGAAAATCCCAAATTCTGCCTGCTCATAAATAAGCTTATCAAGAAATCTAAAGTTATAGGCGTTTTCTTATCAATTATTGGTGTGATTTTCTTTTTGGTGTTTAATAAGTTTAATAAGAATGCTGAATTAGACGCTAGGACATTTACCCAATTTGTTGGTAATTCAGTATTGAACAAAAAGAATGAGAAGTTTTATAATGATACAAATTCTTATTTCATGAACTATACATATGAAGGGAAAGAAGATATAATAAAGTTGATATATGATTATATTAGAAAAAATATATTAGTAAATGTAGAGAATGAGATGGTTAAAATAAAATTAACGGATAGAATTGAACAGAATATATTGATAAGTAATGTAGGATGTAAATATTGTAATAATATG…	MGFSENPKFCLLINKLIKKSKVIGVFLSIIGVIFFLVFNKFNKNAELDARTFTQFVGNSVLNKKNEKFYNDTNSYFMNYTYEGKEDIIKLIYDYIRKNILVNVENEMVKIKLTDRIEQNILISNVGCKYCNNMESLVVVINFDFKERKYFHSVIIGLTLMEHFSKCNYMSKDVTFLFTNKELLYSLGVQEFIQKYFYNNTNRIGKKIIRSSTIIEFDSIYPSYIKINYEGLNGMLPNQDLILLLTNELHFYSIPIKMELTHGSIFDMALEKNYENGHIYFLRENIPAFTATGGSKVPIRNKMINLFNLTKALQSYLRSQSNTHEGFCHSSNFYFFNTFRRHIPISIYCYSVYLICAYSIMKLFKSTIFRSYINFLTGFYTYLITILIISLPIYLISTNK…	795	8	null	no	GO_0042765, GO_0005789, GO_0016021	GO_0005783	GO_0042765,GO_0005789,GO_0016021,GO_0005783	0	0	0	0	0	0	0	0	0	0	0	0	0	0	0	0	0	0	0	0	0	0	0	0	0	0	0	0	0	0	0	0	0	0	0	0	0
4198	PF3D7_1331300	signal peptidase 21 kDa subunit	SP21	ATGGATTTTATAAAAGAACAATATAATTCGTTAGTCCTAGACCTTAGAAAGACATTTAGAAATAAAAGAGATGGACTATCTCATATTTTAAATGTCATATGTTTATTACTTAACGCATTGATGATATGGAAACTTTTGGTAGTATTCACAGGATGTGAATCACCCGTTGTTGTTGTATTAAGTGGGAGTATGGAGCCAGGGTATTATCGAGGTGACACATTGGCATTGTATCATCCTCCAAAAATACATGCGGGGGATGTAGTTGTATATCAAATAAATGGAAGAGATATACCAATTGTTCATAGGATTTTAAGTTTGCACACATCAAAAGATAATAAATTTCACTTATTATCAAAGGGTGATAATAATAATATTGATGATAGAGGTTTATATGATCCA…	MDFIKEQYNSLVLDLRKTFRNKRDGLSHILNVICLLLNALMIWKLLVVFTGCESPVVVVLSGSMEPGYYRGDTLALYHPPKIHAGDVVVYQINGRDIPIVHRILSLHTSKDNKFHLLSKGDNNNIDDRGLYDPHQYWLENEHVLGLSVGYTPYIGILTIWINEYPVVKWAIVSIMLIMILMGYE	184	3	null	no	GO_0016021, GO_0016020	GO_0005783, GO_0005787	GO_0016021,GO_0016020,GO_0005783,GO_0005787	0	0	0	0	0	0	0	0	0	0	0	0	0	0	0	0	0	0	0	0	0	0	0	0	0	0	0	0	0	0	0	0	0	0	0	0	0
5258	PF3D7_1468500	derlin-1	DER1-1	ATGGTTCAGTTAAGTGATGTATTAGGTAATGTACCATTAATAACTAGATTATATCTAATCCTTTCTTTTGCTTTAATGGTATTATGTTCCCTTGATATAATTTCTCCATTAAGTTTATATCTCAATTGGAATTTAGTATTAAGAGAACATCAGTATTGGAGGCTTATCACGTGTTTTTTATATTTTGGGTCCTTTGGTATACATTTTTTCTGGGATGTTTACGTCTTAATATATTATTGTAGCTCGTTAGAAGAGGTAACTTTCAGAAACAATTCTGCTGACTTTTTGTGGATGATTATTTTATCTTGTTGTATGCTATTAGGGGTATCATACATGTTTGGAGGTGTATATTTTTATAGTAGCTGTATAATAAATGTTATCACTTACATATGGAGTAAA…	MVQLSDVLGNVPLITRLYLILSFALMVLCSLDIISPLSLYLNWNLVLREHQYWRLITCFLYFGSFGIHFFWDVYVLIYYCSSLEEVTFRNNSADFLWMIILSCCMLLGVSYMFGGVYFYSSCIINVITYIWSKNNSTTRLTILFFTIRASYLPWALTLLSLIVDYNSNDNFFGILVGHIYFFFTSIFPHMPIAKNTNIFKTPRVLKWLLKEESS	214	5	HMM: MVQLSDVLGNVPLITRLYLILSFALMVLCSLD, NN: MVQLSDVLGNVPLITRLYLILSFALMVLCS	yes	GO_0016021	GO_0005783, GO_0005789	GO_0016021,GO_0005783,GO_0005789	0	0	0	0	0	0	0	0	0	0	0	0	0	0	0	0	0	0	0	0	0	0	0	0	0	0	0	0	0	0	0	0	0	0	0	0	0
3464	PF3D7_1210900	GPI mannosyltransferase 1	PIGM	ATGGGGCATACACATAAAGAATATAAAAACAATGAGAAGAGTGCAATATTTTTTGAGTGGTTGATTTTTTTTGTGGGTATAATAATTCGTATAATTATTTATTATTATGGAAGGTGGCAAGATAAAAACTTTAATGTTAAGTTTACAGATGTAGATTATTATGTTTTTTCTGATGCTGCAAAATATGTACTTATGAACAAATCACCATATGAAAGATATACATATAGATATACACCTTTATTAGCATATATAATGATACCAAATTTTTTTGTTCATTTTTCTTTTGGGAAAATATTATTTTCATTTATCGATATTCTTGTTACTATTCTTATAAATCAAATTATAAAAATCAAATATACTAATTGTAAAAATTATATATTTTATACTTGTTTATGGTTT…	MGHTHKEYKNNEKSAIFFEWLIFFVGIIIRIIIYYYGRWQDKNFNVKFTDVDYYVFSDAAKYVLMNKSPYERYTYRYTPLLAYIMIPNFFVHFSFGKILFSFIDILVTILINQIIKIKYTNCKNYIFYTCLWFLNPLVIIISLRGNADVIPCFLIIVTIFCIYKKHIFLSSIFYGLAVNFKIYTIIYALPFMLYLNKNYLLGENIFQLNEKKKKKKNDFLLNTFFYIFRIISNFFVELFKLNYEQFLFAICSSSVFLILNCVFYIIYGYEFLYESFIYHIIRRDHRHNFSLFFYLMYLSIEKNSKIIPLITFVPQIILVALFGFKYARTNLELSMFLQTISFIALNKVCTSQYFIWCIPFLPIILCAITLSKRNMFLIISSILFFIVAKLHWLWWAYYL…	441	11	null	no	GO_0005789, GO_0016021	GO_0005783, GO_0016020	GO_0005789,GO_0016021,GO_0005783,GO_0016020	0	0	0	0	0	0	0	0	0	0	0	0	0	0	0	0	0	0	0	0	0	0	0	0	0	0	0	0	0	0	0	0	0	0	0	0	0
965	PF3D7_0513800	ras-related protein Rab-1A	RAB1a	ATGACTGAGAATAGATCAAGAGATTATGATTATTTATATAAAATAATATTGATAGGTGACAGTGGTGTTGGTAAATCGTGTATTTTATTACGTTTTTCAGATGACCATTTTACAGAGAGTTATATAACAACAATCGGTGTTGATTTTAGATTTAGAACAATAAAGGTTGATGATAAAATTGTGAAATTACAAATATGGGATACTGCTGGACAAGAACGATTTCGAACAATAACATCAGCATATTACAGAGGAGCTGATGGAATAATAATAATTTATGATACGACAGACAGAAATTCATTTTTACATATTAATGACTGGATGAATGAAATAAATAAATATACGAATGAAGATACTTGTAAATTACTTGTAGGAAATAAAGCAGATTGTAAAGATGATATA…	MTENRSRDYDYLYKIILIGDSGVGKSCILLRFSDDHFTESYITTIGVDFRFRTIKVDDKIVKLQIWDTAGQERFRTITSAYYRGADGIIIIYDTTDRNSFLHINDWMNEINKYTNEDTCKLLVGNKADCKDDIEITTMEGQNKAKELNISFIETSAKDATNVELAFTMITQELIKKKKKKNFTSLKNNHAKLKLSTHDNSPQSFCSC	207	0	null	no	GO_0005622, GO_0016020	GO_0005783, GO_0020008	GO_0005622,GO_0016020,GO_0005783,GO_0020008	0	0	0	0	0	0	0	0	0	0	0	0	0	0	0	0	0	0	0	1	0	0	0	0	0	0	0	0	0	0	0	0	0	0	0	0	0
5143	PF3D7_1457000	signal peptide peptidase	SPP	ATGAATTTATTAAAATTAATTGGAAAAAATAAGAAAATGAAGAATGAAAATATGGGTAATTCCATATTTTATTATTCCTGTTATGTTATTATAGTTCTTACTATAATATTGTCTAAGTTTGTTGTAATCCCTTTGATGGCTCAAATGTTTTTGTACACATTCATTACAATATATATTGGAAGTCATGATAGTTTGAAACAATTAGAAATTGATGATAAAACCAAAAAGTCAGACAACATAACAGCCTATGATGCTATGATGTTTCCAGTAATTGGATCTGCAGCTTTGCTTACTTTATATTTCGCATATAAGTTCTTAGATCCGTTTTATGTGAATTTATTATTGACTCTTTACCTAACCTTGGCGGGTGTATTTTCCTTACAGGGTGTATTTACAACA…	MNLLKLIGKNKKMKNENMGNSIFYYSCYVIIVLTIILSKFVVIPLMAQMFLYTFITIYIGSHDSLKQLEIDDKTKKSDNITAYDAMMFPVIGSAALLTLYFAYKFLDPFYVNLLLTLYLTLAGVFSLQGVFTTILEPVFPNFFKKDEYVKTFKLPNFIYKEPIVFNTNKGEIVCLILSFAIGLRWIFYKDFITHNVLAVSFCFQAISLVILSNFLIGFLLLSGLFVYDIFWVFGNDVMVTVAKSFEAPVKLLFPVSSDPVHYSMLGLGDIIIPGILMSLCLRFDYYLFKNNIHKGNLKKMFNDISIHESFKKYYFYTIIIFYELGLVVTYCMLFYFEHPQPALLYLVPACILAILACSICKREFKLMIKYQEITDKSNTVDDASKNKKKDKEEIPKIQE…	412	8	null	no	GO_0016021	GO_0005783, GO_0020009	GO_0016021,GO_0005783,GO_0020009	0	0	0	0	0	0	0	0	0	0	0	0	0	0	0	0	0	0	0	0	0	0	0	0	0	0	0	0	0	0	0	0	0	0	0	0	0
1544	PF3D7_0709000	chloroquine resistance transporter	CRT	ATGAAATTCGCAAGTAAAAAAAATAATCAAAAAAATTCAAGCAAAAATGACGAGCGTTATAGAGAATTAGATAATTTAGTACAAGAAGGAAATGGCTCACGTTTAGGTGGAGGTTCTTGTCTTGGTAAATGTGCTCATGTGTTTAAACTTATTTTTAAAGAGATTAAGGATAATATTTTTATTTATATTTTAAGTATTATTTATTTAAGTGTATGTGTAATGAATAAAATTTTTGCTAAAAGAACTTTAAACAAAATTGGTAACTATAGTTTTGTAACATCCGAAACTCACAACTTTATTTGTATGATTATGTTCTTTATTGTTTATTCCTTATTTGGAAATAAAAAGGGAAATTCAAAAGAACGACACCGAAGCTTTAATTTACAATTTTTTGCTATA…	MKFASKKNNQKNSSKNDERYRELDNLVQEGNGSRLGGGSCLGKCAHVFKLIFKEIKDNIFIYILSIIYLSVCVMNKIFAKRTLNKIGNYSFVTSETHNFICMIMFFIVYSLFGNKKGNSKERHRSFNLQFFAISMLDACSVILAFIGLTRTTGNIQSFVLQLSIPINMFFCFLILRYRYHLYNYLGAVIIVVTIALVEMKLSFETQEENSIIFNLVLISALIPVCFSNMTREIVFKKYKIDILRLNAMVSFFQLFTSCLILPVYTLPFLKQLHLPYNEIWTNIKNGFACLFLGRNTVVENCGLGMAKLCDDCDGAWKTFALFSFFNICDNLITSYIIDKFSTMTYTIVSCIQGPAIAIAYYFKFLAGDVVREPRLLDFVTLFGYLFGSIIYRVGNIILE…	424	10	null	no	GO_0016020	GO_0005783, GO_0020020, GO_0016020	GO_0016020,GO_0005783,GO_0020020,GO_0016020	0	0	0	0	0	0	0	0	0	0	0	0	0	0	0	0	0	0	0	0	0	0	0	0	0	0	0	0	0	0	0	0	0	0	0	0	0
233	PF3D7_0210000	secretory complex protein 61 gamma subunit	Sec61-gamma	ATGAATGTTAAAATTCCAGAATTTTTAACTGATGAAAATCACCCAGTAGGTTATTGTGTTAATGGTATACAAACTTTTGTTGAGGATAGCGTAAGGCTAATAAGGAAATGTACCAAGCCCAATAAAAAAGAATATACAAACATAGTATATGCTTGCTCTTTCGGTTTTTTGATTATGGGATTTATTGGATATATAATAAAGCTTGTATTTATTCCTATAAATAACATTTTTGTTGGATCTTATTAA	MNVKIPEFLTDENHPVGYCVNGIQTFVEDSVRLIRKCTKPNKKEYTNIVYACSFGFLIMGFIGYIIKLVFIPINNIFVGSY	81	1	null	no	GO_0016020	GO_0005784, GO_0005789	GO_0016020,GO_0005784,GO_0005789	0	0	0	0	0	0	0	0	0	0	0	0	0	0	0	0	0	0	0	0	0	0	0	0	0	0	0	0	0	0	0	0	0	0	0	0	0
4956	PF3D7_1438100	secretory complex protein 62	SEC62	ATGAGTAACAGAATGGAGGAATTAGATCCTGATATGCTTGGAGTGCTTAAGTGCGCTTTCAATGCAGGAGTAAAAGTGAAAAGTGCAGCGGAGGTTGGAAAGAGAGCAGTAGAATATTTTAGAGGTGACGATTTTGTAAATTTTTTAAGTACTAATGGTGAAATGTTAAAAAAGAAATTTCCTAATTTATTTATAAATAGAAATTTATCAGATATGAAAGAAATTGAAGAATTTGCTGACATGTTCATACAAAAAGGATATATTTATAAAGCTCAATATAAACCAATAAAAGGAATAAATGAAAAAGATGAAAATGGTGTTTATAAAAGACCTAAATGGCCAAAACGATTAATTATGACTTCAAAACAAAATTTTGATAAAACAAGTTTTTATATATTA…	MSNRMEELDPDMLGVLKCAFNAGVKVKSAAEVGKRAVEYFRGDDFVNFLSTNGEMLKKKFPNLFINRNLSDMKEIEEFADMFIQKGYIYKAQYKPIKGINEKDENGVYKRPKWPKRLIMTSKQNFDKTSFYILVHERNKKLQYFMLISLISIVLICCMFPVWPLRLKLALWHISVAFLTLISIIIVGRLVAFIFFWFFGVDYWIFPNLFDEECNVVESFLPLQSWVYRNDTWFLFVARMCTAVLLAIAIQQLGKTHSIADIRNFATQSYIDIIEWGNKKLAASPENVSMYKSIDSKATFEGNVDDDDTVYDENEENYDCLKKCGFTSFEELVRKCFLKCECMEKVIKSECYKKKCSKVTKAVLDEAHKEACFDKSDN	377	3	null	no	GO_0016021	GO_0005784, GO_0005789	GO_0016021,GO_0005784,GO_0005789	0	0	0	0	0	0	0	0	0	0	0	0	0	0	0	0	0	0	0	0	0	0	0	0	0	0	0	0	0	0	0	0	0	0	0	0	0
4536	PF3D7_1366600	signal recognition particle receptor subunit alpha, putative	SRPR-alpha	ATGATTGATGTCATTAACATATTTAATAAAGGAGGTCTGCTATTGTGGTCATATAATTTTTATGAAATTGATGATACTACAATAAGAACAATAGTTAAACATGTATTAATAGAAGAAAAATATGAAGAGTTTTCTAAGAAACATAATAATTATCATGCCAAATGGAAATTAATAAATGATTTAGACCTTGTTATACTTATAGTGTACCAGGGTATTCAAAATTCAACTTATTTAGAGAATTTATTTTCACAAGTTAAAAAAAACTTTATAAAAATATTACCAAAAAATAAAGATGTATTTGATTATGATCTTCCTATAGATTTTGAAGAACATTTTTTACAAATTATTGAAAATCTAGATGAACATAAAAATTTAAATAATAATACCAAAAAAGATGAT…	MIDVINIFNKGGLLLWSYNFYEIDDTTIRTIVKHVLIEEKYEEFSKKHNNYHAKWKLINDLDLVILIVYQGIQNSTYLENLFSQVKKNFIKILPKNKDVFDYDLPIDFEEHFLQIIENLDEHKNLNNNTKKDDSKKNNKHNTKNNKSDDETSSDNQNNSNSTVEDDDDENTVKNKKNVKVKKTAREWELSQKVTKRDIRKLDYSKNEDNDNNNNNNKNNEMYNNNNNNNNNNNNNNDNIYNNNNSKYEGDYDDSSDGAIESKNNILNKLNDSLFKMFSYNSKIEEEDIEKILHEIKNKLLSKNVAIGICDTLIDRMKENLIGKKKTLFALNVKKTVSNVLSETIQSILIPKDSVDVLRSAIESKSMGKLYSIVFLGVNGVGKSTNLAKVCYYLKNKGNL…	576	0	null	no	GO_0005785	GO_0005785	GO_0005785,GO_0005785	0	0	0	0	0	0	0	0	0	0	0	0	0	0	0	0	0	0	0	0	0	0	0	0	0	0	0	0	0	0	0	0	0	0	0	0	0
1361	PF3D7_0621900	signal recognition particle subunit SRP68, putative	SRP68	ATGAACGAATCGGCTAGTTTAGAGAACGAATCAAATGATGAAAAAAATGGAGATTGTGATAACAATTTATTGAATGAAAAAAATGGAGATTGTGATAACAATTTATTGAATGAAAAAAATGGAGATTGTGATAACAATTTATTGAATGAAAAAAATGGAGATTGTGATAACAATTTATTGAATGAACACGAACTTGTGAACATTGTGAAGGTAAAAAAAGAAAGAGATGGAAATATAAAAAAGAAAGAAAATGAAAAAATAAGTTTTGATATATTTTCTTATTTAAATAAAGTATATCAAAAACATGGATTATATAATGAAGAGATATCCCGATTTCTACTTTATATTAATAGAAGAAGAAGAAAATTAAGAAGCAAAATATTATTTAATGTAAAAAAA…	MNESASLENESNDEKNGDCDNNLLNEKNGDCDNNLLNEKNGDCDNNLLNEKNGDCDNNLLNEHELVNIVKVKKERDGNIKKKENEKISFDIFSYLNKVYQKHGLYNEEISRFLLYINRRRRKLRSKILFNVKKVGKYIFKIYECDDIDELFLELLLLDVEACRCRYLEIKTDVNNLKKPYRAKYSYMRRLKKSVQKMNFLIQTINNLVDKNTELQIKCYNSFIQATYLVEKKKYEECLSKTDEFLKFIKLIKRISINALAQTNQNKDNQNDNDQTCYKQVMKDKRASLVYEPDTINLQNELYNSKGNNDMINSEKSIDATFFYFLSVINSYERTCSYNMKKHRLSYINEKLQEEDFKYNYSNSIIQNNNIINNNNNNINEKYCNNITAGDKNYYNLNIQ…	776	0	null	no	GO_0005737, GO_0005634	GO_0005786	GO_0005737,GO_0005634,GO_0005786	0	0	0	0	0	0	0	0	0	0	0	0	0	0	0	0	0	0	0	0	1	0	0	0	0	0	0	0	0	0	0	0	1	0	0	0	0
559	PF3D7_0320700	signal peptidase complex subunit SPC2, putative	SPC2	ATGTCAGGCAATAATGTTCAAGAGGAAGATAGCACATTTCATGTGAGCAACTTATACAGCGAAACGGAAATAAAGAAAATTACCCAAGACTTTATAAGTGAAAAAATACGAGAACAAAATTTTGAGGAAATTGTAAAATACTCAAATATACGAATTTTTTTGAGCTTAGTTTTGATAGTTATAGGAACATACTGCTCAATATTTGTTCAGTATAAAAAAAACCCAGTGATTATGATACAACTATTGGTGGCTTTTTTTGTAGTATCAACAACTTTGATTATCTTTGAATATTTTTTCTTTGATGATGTTTTTATGATATTAAGATCGAATAACGGTTCCTTGGTAAAATTGTATTGTCGTTTGGACGTGAAAAAAAGTACCCTAATTTTGGCCTATAAA…	MSGNNVQEEDSTFHVSNLYSETEIKKITQDFISEKIREQNFEEIVKYSNIRIFLSLVLIVIGTYCSIFVQYKKNPVIMIQLLVAFFVVSTTLIIFEYFFFDDVFMILRSNNGSLVKLYCRLDVKKSTLILAYKLNKNVFETSFELKRLYNENGYLMKPYAKNVVMNFLSAHGRTLKLKN	179	2	null	no	GO_0016021, GO_0005787	GO_0005787	GO_0016021,GO_0005787,GO_0005787	0	0	0	0	0	0	0	0	0	0	0	0	0	0	0	0	0	0	0	0	0	0	0	0	0	0	0	0	0	0	0	0	0	0	0	0	0
4910	PF3D7_1433600	signal peptidase complex subunit SPC1, putative	SPC1	ATGGATGTAATGAACTATTTTATAAGCATAATTAAACATACTTTTGTTTGCCTAAAATCCAATCAAATGGACTATTGTGGTCAAAATCTTGCCTATACTATAAGAAATATTATTTTTGGTATTAGTACAATAATATCAATAATTGTTGGATATTACAGTCAAAGTTTAGCATTGAGTACATATATAATATTAGGAGGGACTGCCTTAGCAAGCATTTTAATATTACCAACGTGGCCAATGTATAATCGAAACAATATTGAATGGGAAAAAAGTTACAGTTCATCAAATGATAAAAAGAGAAAATAA	MDVMNYFISIIKHTFVCLKSNQMDYCGQNLAYTIRNIIFGISTIISIIVGYYSQSLALSTYIILGGTALASILILPTWPMYNRNNIEWEKSYSSSNDKKRK	101	2	null	no	GO_0016021, GO_0005787	GO_0005787	GO_0016021,GO_0005787,GO_0005787	0	0	0	0	0	0	0	0	0	0	0	0	0	0	0	0	0	0	0	0	0	0	0	0	0	0	0	0	0	0	0	0	0	0	0	0	0
2031	PF3D7_0827900	protein disulfide isomerase	PDI8	ATGAACAGAAAGTATTTTTCTTCCCTTTTTTTATTTCTTATTTCTTTTGTGTTCGAATCATTTGTTCGTTCGCATGGTGACCTTTTTAATCATTTTGTAACTGATATACATGATGGGGAACTTGATAAATTCATAACAAAGAATGATATAGTTTTGGTTATGTTTTACGCTCCATGGTGCGGTCATTGTAAAAGGCTAATCCCAGAATATAATGAAGCTGCAAATATGTTGAATGAGAAAAAGAGCGAAATAAAATTAGTAAGTATTGATGCTACTTCAGAAAATGCTCTTGCTCAAGAATATGGAATAACAGGATATCCAACTTTGATTTTATTTAATAAAAAGAACAAAATAAATTATGGAGGCGGGAGAACAGCTCAATCTATTGTTGATTGGTTA…	MNRKYFSSLFLFLISFVFESFVRSHGDLFNHFVTDIHDGELDKFITKNDIVLVMFYAPWCGHCKRLIPEYNEAANMLNEKKSEIKLVSIDATSENALAQEYGITGYPTLILFNKKNKINYGGGRTAQSIVDWLLQMTGPVFSHVEGNIEDVLKEKKINVAFYLEYTSEDNDLYKKFNEVGDKNREIAKYFVKKNDKHNKLFCFRTDEKKVEYDEKTPLEEFVTSESFPLFGEINTENYRFYAESPKELVWVCATYEQYNEIKEHVRLAAQELRKKTHFVLLNIPEYAEHAKASLGLTEFPGLAFQSNEGRYLLKNPKESLLNHNAIINFFKDVEAGKIEKSLKSEPIPEDDKNAPVKIVVGNSFVDVVLKSGKDVLIEIYAPWCGHCKKLEPVYEDLGR…	483	1	HMM: MNRKYFSSLFLFLISFVFESFVRSHGD, NN: MNRKYFSSLFLFLISFVFESFVRSH	yes	GO_0005783	GO_0005788, GO_0020009	GO_0005783,GO_0005788,GO_0020009	0	0	0	0	0	0	0	0	0	0	0	0	0	0	0	0	0	0	0	0	0	0	0	0	0	0	0	0	0	0	0	0	0	0	0	0	0
4620	PF3D7_1403700	translocation associated membrane protein, putative	TRAM	ATGGATAAGCAATATTTGCATACCTTAGAAGAATATTTTCTTAGCGTAAAGAATAAGGGATATCTTGAGCAATATTTGATTAACCCTAAATTAAGCAGATGGGATTTCATAATTTTTTTTGTTTTTTTTGTATTGATAACGTTGTTACGATTGGTAATTTCAGGTGTACAAAAGGAGGTAATAAGAAGGAATAGTATATTATATGGATTATCAAGAAATTCTATATTAGATAGAGTGAATAGAAAATATGATATATCCAAAAGTGGTTCTGTATATAAATGGAAAGAGAATTTTTGGTTTGCTTTATGGCATAGTTTTTCTTTTACATATAACTTGATTTTATTATTTGTTATGTCTGGGTATTTAAATAATAAGAATGGATGGATAAAAATGTGTTTG…	MDKQYLHTLEEYFLSVKNKGYLEQYLINPKLSRWDFIIFFVFFVLITLLRLVISGVQKEVIRRNSILYGLSRNSILDRVNRKYDISKSGSVYKWKENFWFALWHSFSFTYNLILLFVMSGYLNNKNGWIKMCLKERTGKWFFLVTDEEYKENKRGWPFMYINNYVYYFYILQISYWFSCLFYLNYEIRRKDYYVFVLHHLSTIILLTYSHVLNFWRVGLLILFIHDIVDIVLYLSKLLNYTNLKNRIFLTFFYILFVLYYFFFRIFLYFYYIVLPLSNTKIIRSYTDGFISSHKDVPGGLVLLIFLWTLMAMHVYWFFLILKMSRLFIIKTMKNEKITDIRSDNEDDSTSTMESIKKED	359	7	null	no	GO_0005783, GO_0016021	GO_0005789	GO_0005783,GO_0016021,GO_0005789	0	0	0	0	0	0	0	0	0	0	0	0	0	0	0	0	0	0	0	0	0	0	0	0	0	0	0	0	0	0	0	0	0	0	0	0	0
953	PF3D7_0512600	ras-related protein Rab-1B	RAB1b	ATGAATGATAGCTATGATAGTTTATTTAAAATATTGTTAATTGGAGATAGTGGTGTTGGAAAATCATGTTTGCTCCTTCGTTTTGCCGATGATACGTATACAGACAGTTATATAAGTACCATAGGAGTAGACTTTAAAATAAAAACAATAGAAATAGAAGATAAAATAATAAAATTACAAATATGGGATACGGCTGGGCAAGAAAGGTTCCGAACAATAACATCCTCATATTATAGAGGAGCCCAAGGTATAATTATTGTATATGACGTAACGGATAGGGACAGCTTTAATAACGTTAAGAATTGGATTATAGAAATTGAAAAATATGCTTCTGAAGATGTACAGAAGATATTGATAGGAAATAAGATCGATTTAAAGAATGATAGGAATGTAAGTTAT…	MNDSYDSLFKILLIGDSGVGKSCLLLRFADDTYTDSYISTIGVDFKIKTIEIEDKIIKLQIWDTAGQERFRTITSSYYRGAQGIIIVYDVTDRDSFNNVKNWIIEIEKYASEDVQKILIGNKIDLKNDRNVSYEEGKELADSCNIQFLETSAKIAHNVEQAFKTMAYEIKNKSQHETINKGKTNINLNARPIKDTKKKCC	200	0	null	no	GO_0005622, GO_0016020	GO_0005793, GO_0020020, GO_0016020	GO_0005622,GO_0016020,GO_0005793,GO_0020020,GO_0016020	0	0	0	0	0	0	0	0	0	0	0	0	0	0	0	0	0	0	0	1	0	0	0	0	0	0	0	0	0	0	0	0	0	0	0	0	0
5090	PF3D7_1451800	sortilin	SORTLR	ATGAAAAAAAAGCTTGAAAAGCAAAAGAAGTTGTTAGAATATGAAAAAGGATATTATTCAAATAAAGTAAAAATGCGAAATATGTTATTTTTCAAAAGTATAGGAAATAAGAATCATTTATTTTTGGTTTTTCTATTATTCTTGTTTTTTTCTTTTTCATGTATAAATTTTACACAATGTCAAATAACAAAAAAGAAAGTATCAGTAAGTGAAATAAATTTCGATAGTGCAGTGGATGATGTTCAATGGTGTGGAAATAATCATATGACAGTTTTAGTAAAAACTGTAAAGGGAAGATTATATAGGAGTTCAGATGGAGGAAAAATATGGACTAATATAACTGGGAATTTATCGGATAAAGAAAATAATAAAAGTGATCCATCATCAAATCATATGAAT…	MKKKLEKQKKLLEYEKGYYSNKVKMRNMLFFKSIGNKNHLFLVFLLFLFFSFSCINFTQCQITKKKVSVSEINFDSAVDDVQWCGNNHMTVLVKTVKGRLYRSSDGGKIWTNITGNLSDKENNKSDPSSNHMNEMTTVDLIMVNSVNKNIVLIIGNQKNHYISEDSGETFRLLNYQNKINFWQFHSTKTHWALVSSWTEACYSNDDNSGECMQTLSLTKDLGRTFQLIDIYVVQFNWGDKESHLEDTIYYTRHKNRNGHQQRFSGWSKDVDFVATHNFGKSVDVLVKQGNKFLISNGYIFVAKLNDVIKQTVNMMVSTDGGKTFNKANLPENIHEKSYTVLDTSEGSIMLHVNHGTSSEKINTGNVYISDASGLNYTLSLPNNIRTSSGECEFDRVLSL…	895	2	null	no	GO_0016021	GO_0005794	GO_0016021,GO_0005794	0	0	0	0	0	0	0	0	0	0	0	0	0	0	0	0	0	0	0	0	0	0	0	0	0	0	0	0	0	0	0	0	0	0	0	0	0
768	PF3D7_0418500	trafficking protein particle complex subunit 3, putative	BET3	ATGTCAAAGGATAAATATCAAAAACAAGGAGATGCCATTTTTGCAAAATTAGAGAAAGTGAACTCTGAATTATTTTCATTTACATATGGAGCCTTAGTGAGTCAACTTTTGAAAGATCTGGAATTAGTAGACGAAGTCAATGAGCAATTAGAAAAAATGGGATTCAACATAGGCACAAGACTAATTGAAGAATTCCTTGCAAAGTCTGATATTTCATTTTGTGAAGATTTTGAAGAAACAGTCAATGTTATAGCTAAGGTGGCCTTTAAAATGTTCCTAGGAATAAGTGGAACAGTTACTTGTGTAAATAAAGAATCCAATATATTTTCTATTATTTTTGATAACAATCCTTTAAGCGATTTTGTGGAATTACCAAAATCATTATCATCATTAAATTAT…	MSKDKYQKQGDAIFAKLEKVNSELFSFTYGALVSQLLKDLELVDEVNEQLEKMGFNIGTRLIEEFLAKSDISFCEDFEETVNVIAKVAFKMFLGISGTVTCVNKESNIFSIIFDNNPLSDFVELPKSLSSLNYCSLLCGVIKGALEQIRIKVNCYFVKDMLKGDDYYELYIQLNEVMKEEILNDEES	187	0	null	no	GO_0030008	GO_0005794	GO_0030008,GO_0005794	0	0	0	0	0	0	0	0	0	0	0	0	0	0	0	0	0	0	0	0	0	0	0	0	0	0	0	0	0	0	0	0	0	0	0	0	0
2636	PF3D7_1017300	golgi re-assembly stacking protein 1, golgi re-assembly stacking protein 2	GRASP	ATGGGAGCAGGACAAACGAAGGAAATTATGGGTGGATATAGAATTCTTAGGATATCAGAAAATAGCCCTTGTTCCAATGTTGGTTTAGAAATATTTTTCGACTACATAATTCAAATAGACGATTTGAAATTATTAGATTCTTCTAAAAGGACCTATGACAATTTTATTGAAAAAATAAAACTGCATGAAAATAAAGAATTAACTCTAGATATTTATAATTGTAGATATGATAAAATAAAGAAGGTTAAAGTAATTCCAGGAAAATGGGAGGGGAATGGATTATTAGGAATTCATATAAGTTATGAATTTTTAAATGCTTTAAATGAGGGTGTAAGAATATTAGAAATTTTGGAAAATTCTCCTGCATATCAAAGTCAATTAATAGAATACGAAGATTTT…	MGAGQTKEIMGGYRILRISENSPCSNVGLEIFFDYIIQIDDLKLLDSSKRTYDNFIEKIKLHENKELTLDIYNCRYDKIKKVKVIPGKWEGNGLLGIHISYEFLNALNEGVRILEILENSPAYQSQLIEYEDFIIGYDKGIFRNQDEFMSYINMNNIIKENSHDKKVLFNTILYVYNYKHENIRKVQIQLNDSWGGKGLLGCNVATGYLHKIPPCQIKDKEEKENINLKESFSSSHIKNNESESNNYKKEHMDITKVNDLEIVLLNDSVGKNTNNINNTESNEKNSTNIIPLWKNEAEKSGREDKNYINSQDVELNHDNNIKYMKNDSNSNSHSSNGSSKTLEVDMDNNAETINYDDKFSYELKSTLDDQPEEDMHEIKKENFQNEQVILEDIKREEPN…	573	0	null	no	GO_0016020	GO_0005794, GO_0005801	GO_0016020,GO_0005794,GO_0005801	0	0	0	0	0	0	0	0	0	0	0	0	0	0	0	0	0	0	0	0	0	0	0	0	0	0	0	0	0	0	0	0	0	0	0	0	0
4410	PF3D7_1353600	ER lumen protein retaining receptor	ERD2	ATGAATATATTTAGACTGATCGGTGATATTTTGCACTTAGTAAGTATGTATATACTTATTATGAAGTTAAAGAAATCAAAGAATTGTATAGGTATATCATGTCGTATGCAAGAATTGTATTTAATAGTATTTTTATGCAGATATATTGATCTCTTCTTTGTTTTTGTGAGCTTTTACAATACAGTTATGAAAATAACTTTTATACTGACAATAGCGTATACTATATATTTAATAAGATTGAAATTACCCATATCTCAAACATACAATAGAAAAGTAGACAATTTTAAAAGTGAAAAATATTTGATTCCTCCATGTTTAGTTTTGAGTTTGTTAACCTGTAAAACTTACAACTTGTATAACATTTTATGGTCCTTTTCCATATGGTTAGAAAGTGTGGCT…	MNIFRLIGDILHLVSMYILIMKLKKSKNCIGISCRMQELYLIVFLCRYIDLFFVFVSFYNTVMKITFILTIAYTIYLIRLKLPISQTYNRKVDNFKSEKYLIPPCLVLSLLTCKTYNLYNILWSFSIWLESVAILPQLVLLEKQREVENITSHYVITMGLYRAFYILNWIYRYFFDDKPYINVVGWIGGLIQTLLYIDFFYYFALAKWYGKKLVLPFNGEV	221	4	null	no	GO_0016021	GO_0005794, GO_0005801	GO_0016021,GO_0005794,GO_0005801	0	0	0	0	0	0	0	0	0	0	0	0	0	0	0	0	0	0	0	0	0	0	0	0	0	0	0	0	0	0	0	0	0	0	0	0	0
2674	PF3D7_1020900	ADP-ribosylation factor	ARF1	ATGGGTTTATATGTAAGTAGGTTATTTAATCGTTTATTTCAAAAAAAAGATGTACGTATTTTAATGGTTGGATTAGATGCTGCTGGAAAAACTACAATATTATATAAAGTAAAACTTGGTGAAGTTGTTACGACTATTCCAACAATAGGTTTCAATGTTGAAACTGTCGAATTTCGTAACATTTCATTTACCGTATGGGATGTAGGAGGACAAGATAAGATCCGACCTTTATGGAGACATTATTATTCCAACACAGACGGATTAATATTTGTCGTAGATAGTAATGATAGAGAAAGAATAGATGATGCTCGTGAAGAATTACATAGAATGATAAATGAAGAAGAATTAAAAGATGCTATAATTTTAGTCTTCGCTAATAAACAAGATTTACCAAATGCT…	MGLYVSRLFNRLFQKKDVRILMVGLDAAGKTTILYKVKLGEVVTTIPTIGFNVETVEFRNISFTVWDVGGQDKIRPLWRHYYSNTDGLIFVVDSNDRERIDDAREELHRMINEEELKDAIILVFANKQDLPNAMSAAEVTEKLHLNTIRERNWFIQSTCATRGDGLYEGFDWLTTHLNNAK	181	0	null	no	GO_0005622	GO_0005794, GO_0020020	GO_0005622,GO_0005794,GO_0020020	0	0	0	0	0	0	0	0	0	0	0	0	0	0	0	0	0	0	0	1	0	0	0	0	0	0	0	0	0	0	0	0	0	0	0	0	0
3997	PF3D7_1311400	AP-1 complex subunit mu-1	AP1M1	ATGGCATGTATAAGCGCTATCTTTATAATTGATTTAAAAGGAAAAGTAATAATTAATAGAAATTATCGAGGAGAAGTAAATGTAAATTTAACAGAGGTGTTTTATAATTGTGTTATTGATCAAGAAGACAATTTAATAAAACCAATATTTCATGTTAATGGTTTAACATATTGTTGGGTAGCTCATAATAATATATACTTTTTAGCAGTAACACGTAAGAATAGTAATGCTACATTAATTATAGCATTTTTATATAAGCTCATACAAGTATTAAAAGATTATTTTAAGGTATTAGAAGAAGAAAGTATTAAAGATAATTTTGTAATCACATATGAATTATTAGATGAAATGATTGATAATGGTTTCCCTCAATTAAGTGAAGTAAAAATTTTAAGAGAA…	MACISAIFIIDLKGKVIINRNYRGEVNVNLTEVFYNCVIDQEDNLIKPIFHVNGLTYCWVAHNNIYFLAVTRKNSNATLIIAFLYKLIQVLKDYFKVLEEESIKDNFVITYELLDEMIDNGFPQLSEVKILREYIKNKAHQLTVNNFKIPSALTNSVSWRSEGIKYKKNEIFLDVVESLNIIISSNGTVLRSEILGCLKMKSYLSGMPELKLGLNDKLLFNKNLNNYPNSSNNNLNNKTKLVELEDIKFHQCVRLSKFENDRTISFIPPDGIFNLMTYRLSTHVKPLFWLDINITKKSLTKIEYNVKAKSQFKNKSIANNVEFHLPVPADVDSPHFQTYIGTVKYYPDKDILIWKIKQFQGQKEYIMNAQFGLPSIVSNENKDLYYKRPVNVKFEIPYF…	437	0	null	no	GO_0030131	GO_0005794, GO_0030131, GO_0030125, GO_0031410, GO_0020008	GO_0030131,GO_0005794,GO_0030131,GO_0030125,GO_0031410,GO_0020008	0	0	0	0	0	0	0	0	0	0	0	0	0	0	0	0	0	0	0	0	0	0	0	0	0	0	0	0	0	0	0	0	0	0	0	0	0
2187	PF3D7_0910600	SNARE protein	YKT6.1	ATGAATTTATTAGCAATTTTTTTGACAAAATATGTAGAAGATGTTATTTTCCTTTGTAATGCCACAGATTTAAATTCTTATTCTTTTATAAAAAAAAAGGCCTTTAAAGAAGCCGCCTTTTTTGTGGCTAGAACTATTCCATCACGGATAGAATATAATACCAAAGAAATAATAACTCATGAAAATAATACAGTTTTCGCTTTTAAATATGAAGACAATATTTGTCCTATTGTAATAGCTACAGACGATTATCCGGAAAGGGTTGCTTTTTATATGATAAATGAGATTTATAGAGATTTCATAAGTACCATTCCCAAGGAAGAATGGTCGAGTGTAAAACAAGACAATAAAATATCGTTTAATTTGTATACATATTTAACAAAATATAAGGACCCTTTA…	MNLLAIFLTKYVEDVIFLCNATDLNSYSFIKKKAFKEAAFFVARTIPSRIEYNTKEIITHENNTVFAFKYEDNICPIVIATDDYPERVAFYMINEIYRDFISTIPKEEWSSVKQDNKISFNLYTYLTKYKDPLNCDAITQTNIKINENIEKVRVTMDALIRNRENLDVLVDKSKDLSSTTKQLFKQSKKLKKKQCCSIM	199	0	null	no	GO_0016021	GO_0005794, GO_0031201, GO_0005829	GO_0016021,GO_0005794,GO_0031201,GO_0005829	0	0	0	0	0	0	0	0	0	0	0	0	0	0	0	0	0	0	0	0	0	0	0	0	0	0	0	0	0	0	0	0	0	0	0	0	0
1795	PF3D7_0803700	tubulin gamma chain	g-tub	ATGCCGAGAGAAATTATCACACTTCAATGTGGTCAATGCGGAAATCAAATAGGTGTGGAATTTTGGAAACAGCTATGCAATGAACATAATATTGATCAAGAGGGTATACTAAAAAATAATAATTTTTTAAATGAAGATAGGAAAGATATATTTTTTTACCAAGCCGATGATGAACATTTTATTCCGAGGGCTTTGTTATTTGATTTAGAACCTCGTGTAATTAATAGTATCCAGACTAGCGAATATCGAAATTTGTATAATCCTGAGAATATGTTTATTTCTAAAGAAGGTGGAGGTGCAGGTAATAATTGGGGTTGTGGATATAGTCAAGGACATAAAGTAGAAGAAGAAATTATTGATATGATTGATAGAGAAGTGGATAATAGTGATAATTTAGAA…	MPREIITLQCGQCGNQIGVEFWKQLCNEHNIDQEGILKNNNFLNEDRKDIFFYQADDEHFIPRALLFDLEPRVINSIQTSEYRNLYNPENMFISKEGGGAGNNWGCGYSQGHKVEEEIIDMIDREVDNSDNLEGFILSHSIAGGTGSGMGSYLLELLNDNYSKKMIQTFSVFPLLTNESSDVVVQPYNSILTLKRLILSTDSVVVIDNTSLNRIFVERLKLNNPTFQQTNTIISNVMSASTTTLRYPGSMNNDMISLISSLIINPKCHFLITSYTPITIDKHISNVQKTTVLDVMKRLLHTKNIMVSAPVRRGMYISILNIIRGETDPTQVHKGLQRIRDRKLVNFIKWNPASIQVTLAKQSPHVVSQHKVCGLMMANHTSISTLFERCVTQFDRLYKR…	452	0	null	no	GO_0000930, GO_0005874, GO_0043234	GO_0005815	GO_0000930,GO_0005874,GO_0043234,GO_0005815	0	0	0	0	0	0	0	0	0	0	0	0	0	0	1	0	0	0	0	0	0	0	0	0	0	0	0	0	0	0	0	0	0	0	0	0	0
514	PF3D7_0316300	inorganic pyrophosphatase, inorganic pyrophosphatase, putative	PPase	ATGGGAAGTAAACTTATAAATGTTGAAGGTGGCAATAATCAGGATGATAATAAATATAATAGTAACAATGTAATAAGCATAAATAATAAAGTGAATAAGAATGATTATTTTATAGAGACCAATAAAGAATTAAAAATTAATTTGAATTTTCAAAATAACAATATTATATCAAATATTTTTTCGAACATTAATATATATGATAAGATAAGTAATATTTTTATAAACAATAAGAAAACATATATGCTGAAATATAATAATAATATAAATGAAGAGAATTTCTTTATATCCTATTTTGAAAAGAAGGATGATAATTTTGTGCCTATATCACCATGGCATCATATTGATCTGAAAAATGATGATGGTACTTACAATATGATTGTTGAAATAACAAAATATAAT…	MGSKLINVEGGNNQDDNKYNSNNVISINNKVNKNDYFIETNKELKINLNFQNNNIISNIFSNINIYDKISNIFINNKKTYMLKYNNNINEENFFISYFEKKDDNFVPISPWHHIDLKNDDGTYNMIVEITKYNYIKLEIQLREKFNVIKQDKKKGKLRYYHNSIYWNYGALPQTYEYPKHIYQNKSKKNKEALLFTGDNDPLDILDIGSACLKIGQVVPVKILGAFTLIDEGELDWKIIAINKEDKHYEDINSLSDIEKYYPHTLSLLLEWFRSYKMADTKKLNLISKQLYDKKESEDLIMKTHHYYLEFREDVKKLKEEHSKETIKEHDYVNAQNIQFNYDKLNNNDDEPMENNLLEDINITYYKSDSAYKPDLNIWTP	380	0	null	no	GO_0005737	GO_0005829	GO_0005737,GO_0005829	0	0	0	0	0	0	0	0	0	0	0	0	0	0	0	0	0	0	0	0	0	0	0	0	0	0	0	0	0	0	0	0	1	0	0	0	0
4250	PF3D7_1336900	tryptophan--tRNA ligase	cTrpRS	ATGGATAAATTGAAAACTATTTATTTGGATTCTGCTTTGAGTATAATTAAAGGAGCTTTATGCATTATTCTTCAAATACCAACAAGTAGAACTACAGAAAGTGTAAAAAAAAAGGCAAACAATGTTGGTGTTATCACAGTAAAATCGATTTTGTCAGAACCCACAATTCATCAGTATGACGACATAAAGAAACTAATTAAAAATAAACTTCAAGAATGCGTCCCTTTTTATAATTATAATATGAATCGTTCTTTTGCTGAGAAAATTTACGGAGACTGCATCTATGATAATTATGGATTGTCAAAAGAGATTAATGAAATAAATTTAATAATATTAGAAGAGTGGAATATTAATTGTAATAAAAATAGAGTTTTAAAAAATACAGGATTAATTAAAGAA…	MDKLKTIYLDSALSIIKGALCIILQIPTSRTTESVKKKANNVGVITVKSILSEPTIHQYDDIKKLIKNKLQECVPFYNYNMNRSFAEKIYGDCIYDNYGLSKEINEINLIILEEWNINCNKNRVLKNTGLIKEITINQFKYSTNKESLEVHFAVSPKYTFEELSTMYKNEKGLYEFLLSPIIKIICNENDKKLLDNMNEECTYLNAEDILPKNKVLPPSGIENIDYERSKDVTPWDVNINNEEGINYNKLIKEFGCSKITENHIKRIEKLTNSKAHHFIRRGIFFSHRDLDFLLNYYEQHKCFYIYTGRGPSSLSMHLGHLIPFYFCKYLQEAFNVPLVIQLSDDEKYLFNQNYSLEYINTLTNENVKDIISVGLNPELTFIFKNTEYAGYLYPTVLSI…	632	0	null	no	GO_0005737	GO_0005829	GO_0005737,GO_0005829	0	0	0	0	0	0	0	0	0	0	0	0	0	0	0	0	0	0	0	0	0	0	0	0	0	0	0	0	0	0	0	0	1	0	0	0	0
5034	PF3D7_1446200	M17 leucyl aminopeptidase	LAP	ATGTATTTTTCTTCCTTATGTAAATTTTTGCCAATATCTGAAAAAGAAAAGATATATTTAAATATTGTAAAAAAACGCTTCTGTAAATCAAATATATATTATAATAATAATAATAATAATATTATTAATTATAATAAGAGAGGTTTAAAATTTTATCCTTTTTGTAATAATTTAAAAAAAAATATAAATTTTGTAAATATTAATAATAAGAAGGGAATAAATTTTCATAGTATAAATAAAGAAAGAAAAATGGCAAGTGAAGTACCACAAGTTGTTTCCTTAGATCCAACAAGTATTCCTATTGAATATAATACTCCTATACATGATATAAAAGTTCAGGTTTATGATATAAAAGGAGGTTGTAATGTTGAAGAAGGATTAACTATTTTCTTAGTTAAT…	MYFSSLCKFLPISEKEKIYLNIVKKRFCKSNIYYNNNNNNIINYNKRGLKFYPFCNNLKKNINFVNINNKKGINFHSINKERKMASEVPQVVSLDPTSIPIEYNTPIHDIKVQVYDIKGGCNVEEGLTIFLVNNPGKENGPVKISSKVNDKNVSEFLKDENMEKFNVKLGTSKHFYMFNDNKNSVAVGYVGCGSVADLSEADMKRVVLSLVTMLHDNKLSKLTVVFEINVDKNLFRFFLETLFYEYMTDERFKSTDKNVNMEYIKHLGVYINNADTYKEEVEKARVYYFGTYYASQLIAAPSNYCNPVSLSNAAVELAQKLNLEYKILGVKELEELKMGAYLSVGKGSMYPNKFIHLTYKSKGDVKKKIALVGKGITFDSGGYNLKAAPGSMIDLMKFD…	605	0	null	no	GO_0005737, GO_0005622	GO_0005829	GO_0005737,GO_0005622,GO_0005829	0	0	0	0	0	0	0	0	0	0	0	0	0	0	0	0	0	0	0	1	0	0	0	0	0	0	0	0	0	0	0	0	1	0	0	0	0
5073	PF3D7_1450100	signal recognition particle subunit SRP54	SRP54	ATGGTGTTAACAGAACTAGGTACGCAAATTACGAACGCTTTTCGAAAACTTCAAACATCGACGTTAGCAGACGATGTTGTAATAGAAGAATGTTTAAAAGAAATAATAAGGGCCTTAATATTATCTGATATAAATGTTAGTTATTTAAAAGATATTAAGAGTAATATAAAGAATAATATAGAAAAGAATATAGATATATATGGAAACAATAAAAAGAAGCTAGTACAAAAATATGTGGTAGAAGAATTAATAAAATTATTAGAAGGAAAAAAAGAGGGTTACAACCCGGTGAAAGGTAAAAGAAATGTTATATTATTTGTAGGACTACAAGGAAGTGGGAAGACAACAACTTGTACAAAATATGCACATTATTATCAAAAGAAAGGTTTTAAGACTGCT…	MVLTELGTQITNAFRKLQTSTLADDVVIEECLKEIIRALILSDINVSYLKDIKSNIKNNIEKNIDIYGNNKKKLVQKYVVEELIKLLEGKKEGYNPVKGKRNVILFVGLQGSGKTTTCTKYAHYYQKKGFKTALVCADTFRAGAFDQLKQNAAKVKIPFYGSYSEVDPVKIATDGVNAFLKDKYDLIIVDSSGRHKQENELFEEMIQVENSIQPEEIIFVIDSHIGQSCHDQAMAFKNSVSLGSIIITKIDGHAKGGGALSAVAATGCPITFIGTGEHVNDFEKFEAKSFVSRLLGLGDISGLVSTIKEVIDIDKQPELMNRLSKGKFVLRDMYDQFQNVFKMGSLSKVMSMIPGFGNNLISKGTEKEGIDKIKKFMVIMDSMTNEELDCIKPLNDSRC…	500	0	null	no	GO_0048500	GO_0005829, GO_0005789, GO_0005634, GO_0005786	GO_0048500,GO_0005829,GO_0005789,GO_0005634,GO_0005786	0	0	0	0	0	0	0	0	0	0	0	0	0	0	0	0	0	0	0	0	1	0	0	0	0	0	0	0	0	0	0	0	0	0	0	0	0
3308	PF3D7_1144900	ras-related protein Rab-6	RAB6	ATGGATGAATTTCAAAACTCGGGACTAAATAAATACAAACTTGTTTTCTTAGGAGAACAAGCTGTTGGTAAAACATCTATAATTACAAGATTCATGTATGATACCTTTGATAATAATTACCAATCGACTATTGGTATAGATTTTTTGAGTAAGACATTATATTTGGATGAAGGTCCTGTACGCTTACAATTGTGGGACACTGCAGGTCAGGAAAGATTTCGAAGTTTAATTCCAAGTTATATTAGGGACTCCGCAGCAGCAATTGTTGTATATGATATTACTAATAGACAATCCTTTGAAAATACCACAAAATGGATACAGGATATTTTGAATGAGAGAGGAAAAGATGTTATAATTGCTTTAGTAGGAAATAAAACAGATTTAGGTGATCTTAGAAAA…	MDEFQNSGLNKYKLVFLGEQAVGKTSIITRFMYDTFDNNYQSTIGIDFLSKTLYLDEGPVRLQLWDTAGQERFRSLIPSYIRDSAAAIVVYDITNRQSFENTTKWIQDILNERGKDVIIALVGNKTDLGDLRKVTYEEGMQKAQEYNTMFHETSAKAGHNIKVLFKKIASKLPNLDNTNNNEANVVDIQLTNNSNKNDKNMLSKCLC	207	0	null	no	GO_0005622, GO_0016020	GO_0005829, GO_0005802	GO_0005622,GO_0016020,GO_0005829,GO_0005802	0	0	0	0	0	0	0	0	0	0	0	0	0	0	0	0	0	0	0	1	0	0	0	0	0	0	0	0	0	0	0	0	0	0	0	0	0
4090	PF3D7_1320600	ras-related protein Rab-11A	RAB11a	ATGGCAATGAAAGAAGATTATTATGATTACCTGTTTAAAATTGTTCTCATTGGAGATTCAGGAGTAGGAAAATCAAACCTACTTTCAAGATTTACAAGAGACGAATTTAATTTAGAAAGCAAGAGCACCATAGGTGTAGAATTTGCTACGAAAAGTATTCAATTAAAAAATAATAAAATTATAAAAGCCCAAATATGGGATACAGCAGGTCAAGAACGATATAGAGCAATTACCTCTGCTTATTATCGAGGAGCAGTTGGTGCGTTATTAGTATATGATATAACAAAAAAAAATTCATTTGAAAATATTGAAAAATGGTTAAAAGAATTAAGAGATAATGCAGATTCAAATATTGTAATTTTATTAGTTGGTAATAAAAGTGATTTAAAGCATTTACGT…	MAMKEDYYDYLFKIVLIGDSGVGKSNLLSRFTRDEFNLESKSTIGVEFATKSIQLKNNKIIKAQIWDTAGQERYRAITSAYYRGAVGALLVYDITKKNSFENIEKWLKELRDNADSNIVILLVGNKSDLKHLRVINDNDATQYAKKEKLAFIETSALEATNVELAFHQLLNEIYNVRQKKQATKNDDNLSIQPRGKKINVDDDNDKNETKKKNKCC	216	0	null	no	GO_0005622, GO_0016020	GO_0005829, GO_0016020, GO_0055037, GO_0020008	GO_0005622,GO_0016020,GO_0005829,GO_0016020,GO_0055037,GO_0020008	0	0	0	0	0	0	0	0	0	0	0	0	0	0	0	0	0	0	0	1	0	0	0	0	0	0	0	0	0	0	0	0	0	0	0	0	0
193	PF3D7_0205900	26S proteasome regulatory subunit RPN1, putative	RPN1	ATGACAGCAGAGGATAAAAAGGCCGTATCTATACAAGTTCCAGTGAAAGATGTGGATGATAAAAGAAGAAAATTGAATAATTCAAAAATAAAAAAGGAAGAATTAAACGAAGAAGAAAAGAAGAAGAAAGAAGAATTAGAATTATTAATTACAAGATTAAGAGATGAAGATGTAAATGTTGTAAATTTGTCGATTAGTTTATTAAATAAAGAAATTATAGATACAAGTGGTATATTAACATCATCGTTATTAGCATTAAAGGTATTAAAAACACATTATAATACGTTAATAGAAATATTTAATGAAATGATATTTGAAGAATGTAAAAAAAAGTTAAGTAATATGATCAGTGCATTATCTACAACCATAGGAGATGAAAATAATATTGTAAAATTTGTT…	MTAEDKKAVSIQVPVKDVDDKRRKLNNSKIKKEELNEEEKKKKEELELLITRLRDEDVNVVNLSISLLNKEIIDTSGILTSSLLALKVLKTHYNTLIEIFNEMIFEECKKKLSNMISALSTTIGDENNIVKFVITGNKHDLINYGHEYIKNLITKLLVEYKILKEEENNQNGLTTTSTTSNKLVTINHIYDIVNIVVPYCFAHNTEYEAIDLLIEVDKINDIYLYVDEKSCDRSILYLLNLTHYSSSTDEYYKLMDVILNILKKHNKHVECLKILLRLNKIDKIKDLIFECNDILICKQIALICSRHCVHIQFTEEEIKKYTHLNLNEISTLTSGEHLSPIFLKLAKDLDVEEPKLPEDVYKSHLEEKRNTTVWDSAKQNLSSTFVNAFVNAAFCKDKL…	966	0	null	no	GO_0000502	GO_0005838	GO_0000502,GO_0005838	0	0	0	0	0	0	0	0	0	0	1	0	0	0	0	0	0	0	0	0	0	0	0	0	0	0	0	0	0	0	0	0	0	0	0	0	0
4261	PF3D7_1338100	26S proteasome regulatory subunit RPN3, putative	RPN3	ATGAAAGATAAACATAAAAAAGTAGAATATGCCGAGAAGGATGTTGAAATAAAAGAAATTGAGAAAGATGATGGAGATAATAAAGTATTTGTAAACAATTTGTTGACGAGCGTAAATTATATTAACAATGCTATAGTACATAAAGATAATAGGCATATGTTACGTATGTTGAAATATATTAAAAATATTCGATTAAGTATTAAGAATGATAAGAATATGTCGATGCCAATAATTATTTATTTAATAAAAAGAATTTTTAAAGAAAATTATCCTATATATAATATATTAAATAAATATATGAATATATATGAGGAAGGGTTATATAAAGAAATTAGTGATTTTTATAATATAAACGAAAAAACATATATGAATTGTTTACCAGAGTTAGAAGTTTTTTTT…	MKDKHKKVEYAEKDVEIKEIEKDDGDNKVFVNNLLTSVNYINNAIVHKDNRHMLRMLKYIKNIRLSIKNDKNMSMPIIIYLIKRIFKENYPIYNILNKYMNIYEEGLYKEISDFYNINEKTYMNCLPELEVFFYLLILLYLLDEKCYDEGMELSTIIINRINKINRRSLDYINAKVYFYYSWIHELGGKLSQVRQKLLFIYRNACLHRDIMTQTVVVNLILRDYIKHNLYDLAVRFISKTSFPENLSSNAQYARYLYYIGKILAVQLDYSEAHRKITQALRKAPQHTQSAKGFKLAATKMEIVVELLMGDIPDRSIFSNKIMYKKLIPYKHVVSAVRNGDINKFAQVMNNYTDLFIHDGVYLLIKRIHHNVIKTALRIINLSYSRISINDIGKKIGIES…	503	0	null	no	GO_0000502	GO_0005838	GO_0000502,GO_0005838	0	0	0	0	0	0	0	0	0	0	1	0	0	0	0	0	0	0	0	0	0	0	0	0	0	0	0	0	0	0	0	0	0	0	0	0	0
5236	PF3D7_1466300	26S proteasome regulatory subunit RPN2, putative	RPN2	ATGAGATTTGAAAATCAGTTTAGTAAACATGATATCGTTACGTCCGCCAGTGGTGTAATAGCATTATTAAATGAAGAAGAAACAAGTTTAAAGCTTTTTGGTCTAGAAAAATTAAATGCAATAGTAGATGTATATTGGCCAGAACTCGCTGATTCTATATTTAAGATAGAAGAATTATGTGAAGATGAAGATTTTGTTGGTAGAGAATTAGCTAATTTATTGGCAAGCAAAATATATTTTCATTTAGAAAAATATTCAGAAGCTTTAAAATATGCATTGTGTGCTGGTAAATTATTTAATATTAAAGAAAAATCACAATATGTTGAGACCATGTTAGCGAAATGTATAGAGAAATATGTCGAAATCAGAGAAATGCAATATGACATAGATTATAACAAT…	MRFENQFSKHDIVTSASGVIALLNEEETSLKLFGLEKLNAIVDVYWPELADSIFKIEELCEDEDFVGRELANLLASKIYFHLEKYSEALKYALCAGKLFNIKEKSQYVETMLAKCIEKYVEIREMQYDIDYNNQHNINDGITNNNDIFNAYNNNDLVELNSHNELLNKETDIFRFDINNEINQKMELLVDEMIDVCIKSNDIKEALGVALDARRLDKVEYIIANAENKIEILAHSINNEKHINMNKSFRNEYFKLLVNLYLSLSEEELKTEYINLCECLYYIDDYKKVAEILLKLLHNYHLMAYQISFDLVDFENKIFLRNILGQIKENLIQNKAYYFGEEYFVTTPQEENNDADNKENESNAITNEQQDENNNEKEDKDNNDGKNPEHNDDNNKPNDN…	1172	0	null	no	GO_0000502	GO_0005838	GO_0000502,GO_0005838	0	0	0	0	0	0	0	0	0	0	1	0	0	0	0	0	0	0	0	0	0	0	0	0	0	0	0	0	0	0	0	0	0	0	0	0	0
3998	PF3D7_1311500	26S protease regulatory subunit 7, putative	RPT1	ATGGAAGAAGAAACTAACACTCAATCGAAGCCATTAGATGATGAAGATATAAATATATTGAAATCATATGGCTCTGGACCATATTCGAAGACCATTAAAAAGGTAGAAGGAGACATATCAGGACTCCTAGTTAATATAAATAAATTATGTGGTGTAAGGGAGAGTGATACAGGATTATGTTTACCAAATCAATGGGATTTACAATTAGATAAACAAATGTTAAATGAAGAACAACCTTTACAAGTTGCAAGATGCACAAAAATTATTAATGCAGATACAGATCAAACTAAATATATTATAAATGTAAAACAAATAGCTAAATTTGTAGTAGGGTTAGGAGATAAGGTAGCACCCAGTGATATTGAAGAAGGAATGAGAGTAGGTGTTGATCGTACGAAA…	MEEETNTQSKPLDDEDINILKSYGSGPYSKTIKKVEGDISGLLVNINKLCGVRESDTGLCLPNQWDLQLDKQMLNEEQPLQVARCTKIINADTDQTKYIINVKQIAKFVVGLGDKVAPSDIEEGMRVGVDRTKYKIQILLPPKIDPSVTMMTVEEKPDITYNDIGGCKEQLEKLREVVEMPLLQPERFVTLGIDPPKGVLLYGPPGTGKTLTARAIANRTDACFICVIGSELVQKYVGEGARMVRELFQMAKSKKACILFIDEVDAIGGSRGDESAHGDHEVQRTMLEIVNQLDGFDNRGNIKVLMATNRPDTLDSALVRPGRIDRRIEFSLPDLEGRTHIFKIHANTMNMSRDVRFELLARLCPNSTGSDIRSVCTEAGMFAIRARRKTITEKDLLLA…	420	0	null	no	GO_0005737	GO_0005838	GO_0005737,GO_0005838	0	0	0	0	0	0	0	0	0	0	0	0	0	0	0	0	0	0	0	0	0	0	0	0	0	0	0	0	0	0	0	0	1	0	0	0	0
1009	PF3D7_0518300	proteasome subunit beta type-1, putative	null	ATGGATCTTATATTATATAATGACAATTTAACAGAAAAGAAAACAGAGAAGGAAAATGTAATAGAGCATGGTCGTGGTTTTAAAAGATGGTATCCATATATTGACAATGGAGGAACTGTCATTGGCTTAACTGGTAAAGATTATGTTATTTTAGCTGCAGATACAAGATTATCTTTATCATATTCAATATATACAAGATTCTGCCCAAAGATATCTAAATTGACTGATAAGTGTATTATAGGTTCCTCAGGAATGCAGTCTGATATAAAAACACTCCATTCATTATTACAAAAAAAAATTCAATTGTTTGTTTTGGAACACTCCCATTATCCAGACATTCATGTTATAGCTAGATTGTTGTGTGTAATATTATATAGTAGAAGATTTTTCCCGTATTAT…	MDLILYNDNLTEKKTEKENVIEHGRGFKRWYPYIDNGGTVIGLTGKDYVILAADTRLSLSYSIYTRFCPKISKLTDKCIIGSSGMQSDIKTLHSLLQKKIQLFVLEHSHYPDIHVIARLLCVILYSRRFFPYYAFNILAGVDENNKGVLYNYDSVGSYCEATHSCVGSGSQLILPILDNRVEQKNQLIKNTNFNLGDDINFVKDAITSATERDIYTGDKTLIYVIDKMGINVNTLDLKQD	240	0	null	no	GO_0005839	GO_0005839	GO_0005839,GO_0005839	0	0	0	0	0	0	0	0	0	0	0	0	0	0	0	0	0	0	0	0	0	0	0	0	0	0	0	0	0	0	0	0	0	0	0	0	0
1796	PF3D7_0803800	proteasome subunit beta type-4	null	ATGACCTTAGGCCCAGTAGTAACAGGTACATCCGTGATAGCTATAAAATACAAACACGGCATAATGATTGCAGCAGATAGAAAAGCTAGCTATGGTAGTTATGCAAAATTTCAGAATGTCGAAAGAATTTTTAAAATAAATAATAAGACGGTTATGGGTTTTAGTGGTGAGCTAGCTGATGCTCAATATTTGCATGAGTTACTTACACGTAAGAATATTAATAATTTAAGTGAGAAGAAAAGAAAAGAAGATATGTATACACCCCAACATTACCATTCGTATGTAAGTAGAGTATTTTATGTTAGAAAAAATAGGATAGATCCCTTATTTAATAATATAATTATAGCAGGAATAAATTCACAAAAATATGATAATAATGATGATAATGTTTTATTATAT…	MTLGPVVTGTSVIAIKYKHGIMIAADRKASYGSYAKFQNVERIFKINNKTVMGFSGELADAQYLHELLTRKNINNLSEKKRKEDMYTPQHYHSYVSRVFYVRKNRIDPLFNNIIIAGINSQKYDNNDDNVLLYTNKNNDDEQNEYKNNEEYKEIHKDDLYIGFVDMHGTNFCDDYITTGYARYFALTLLRDHYKDNMTEEEARILINECLRILYFRDATSSNFIQIVKVTSKGVEYEEPYILPCVLNSADYVYPSTLLPPAGCMW	265	0	null	no	GO_0005839	GO_0005839	GO_0005839,GO_0005839	0	0	0	0	0	0	0	0	0	0	0	0	0	0	0	0	0	0	0	0	0	0	0	0	0	0	0	0	0	0	0	0	0	0	0	0	0
4166	PF3D7_1328100	proteasome subunit beta type-7, putative	null	ATGAAACTCGAATATATAAATATACTCAAAGAAGAAAACGGAGGATATAATTTTGATAACTTAAAAAGAAATGAAATATTAAAAGAAAAGGGAGTAAAGTTTCCACAATTTCGAAAAACAGGAACAACAATCTGTGGATTGGTTTGCCAAAATGCAGTTATTTTGGGTGCCGATACAAGAGCTACGGAGGGACCAATAGTAGCTGATAAAAATTGTAGTAAATTACATTATATAAGTAAAAATATATGGTGTGCAGGTGCAGGTGTAGCAGGAGATTTAGAACATACAACTTTATGGTTACAACATAATGTCGAATTACATCGTTTAAATACAAATACACAACCAAGAGTATCCATGTGTGTATCAAGATTAACTCAAGAATTATTTAAATATCAAGGA…	MKLEYINILKEENGGYNFDNLKRNEILKEKGVKFPQFRKTGTTICGLVCQNAVILGADTRATEGPIVADKNCSKLHYISKNIWCAGAGVAGDLEHTTLWLQHNVELHRLNTNTQPRVSMCVSRLTQELFKYQGYKVCAIVLGGVDVNGPQLYGIHPHGSSCLLPFTALGSGSLNAMAVLEAKYRDNMTIEEGKNLVCEAICAGIFNDLGSGGNVDICVITKDSYQHIRPYKEPNMRLYHLPHPTIYPKGTTPILSEKIEYIKKFISVEDA	270	0	null	no	GO_0005839	GO_0005839	GO_0005839,GO_0005839	0	0	0	0	0	0	0	0	0	0	0	0	0	0	0	0	0	0	0	0	0	0	0	0	0	0	0	0	0	0	0	0	0	0	0	0	0
5282	PF3D7_1470900	proteasome subunit beta type-2, putative	null	ATGGATACGTTGATTGGTTTAAGAGGAAACAATTTCGTAGTCCTGGCTGCTGATACATATAGCATAAATTCAATAATTAAATTAAAAAATGATGACAACACAAAATTTTATGATATACATGGAAATAAATGTTTATTACTAGGAGGTTCGATAGGAGACAGATTACAATTTGGAGAATTCATTCGTAAAAATGTGCACTTGTATCAGTATCAAAATAATACAGATATGTTTGTTAAAAGTTTTGCTTTTTTTACAAGAAAAAATTTGGCTTACTACTTGAGAAGAAACCCTTTTGAAGTTAATTGTCTGATAGCTGGATATGATAAGAAGGATGGATATCAACTATACTGGTGTGATTATTTAAGTAATATGGATTCTGTTAATAAAGGTGCTCATGGA…	MDTLIGLRGNNFVVLAADTYSINSIIKLKNDDNTKFYDIHGNKCLLLGGSIGDRLQFGEFIRKNVHLYQYQNNTDMFVKSFAFFTRKNLAYYLRRNPFEVNCLIAGYDKKDGYQLYWCDYLSNMDSVNKGAHGYGAYLVSAILDKYYHENLTVDEALDIFKLCFEELKKRFLLTQINYELRIMYDNKVETQYVTV	195	0	null	no	GO_0005839	GO_0005839	GO_0005839,GO_0005839	0	0	0	0	0	0	0	0	0	0	0	0	0	0	0	0	0	0	0	0	0	0	0	0	0	0	0	0	0	0	0	0	0	0	0	0	0
522	PF3D7_0317000	proteasome subunit alpha type-3, putative	null	ATGGCTGGACTTAGTGCTGGGTATGATTTATCCGTGTCAACTTTTTCTCCAGACGGTCGTTTGTATCAGGTTGAATATATTTATAAATCAATAAATAATAACAACACAGCTTTATGTTTAGAATGTAAGGATGGAATAATATGTTGTTGTATAAATTCAAATATGGATAAGAATAAGATGATTAAAAAAAATAGTTATAATAGAATATATCATGTCAATAATAATATTATAATAACATATTCAGGATTTGATGGAGATGCAAGAAATATAATAGATAGAGCAAGAAGTGAAGCAAATACTTATTATTATAATTTCCATACAAACATACCATTACATATTTTAGTAAACAGAATTTCTTTATATATCCATGCGTATACATTATATTGGCACATGAGACCT…	MAGLSAGYDLSVSTFSPDGRLYQVEYIYKSINNNNTALCLECKDGIICCCINSNMDKNKMIKKNSYNRIYHVNNNIIITYSGFDGDARNIIDRARSEANTYYYNFHTNIPLHILVNRISLYIHAYTLYWHMRPFAASIIISSFNEKDKGDIYCIEPNGACYKYSGIVIGKNKEMFKTEIEKKDYKDINVRDAIEDIYKFILTSDDHMNKNNLQNLVNFSWICKESSYEFQNIHEEILTPALNKAVEYIEKLN	252	0	null	no	GO_0005839, GO_0019773	GO_0005839	GO_0005839,GO_0019773,GO_0005839	0	0	0	0	0	0	0	0	0	0	0	0	0	0	0	0	0	0	0	0	0	0	0	0	0	0	0	0	0	0	0	0	0	0	0	0	0
1227	PF3D7_0608500	proteasome subunit alpha type-2, putative	null	ATGGCAGATGGTGAATATAGTTTTTCTTTAACAACTTTTAGTCCAACAGGAAAATTAGTACAAATTGAATATGCTCTTAATAGAGTATCTAGCAGTTCGCCAGCTTTAGGTATTAGAGCCAAGAATGGTGTGATAATTGCTACCGAAAAGAAAAGTCCAAATGAATTAATAGAAGAAAATAGCATATTCAAAATACAACAAATAAGTGAACATATAGGTATTGTATATGCAGGAATGCCTGGAGATTTCCGTGTATTATTAAAAAGGGCAAGAAAAGAAGCCATAAGATATTCTTTACAATATGGAAGTGAAATATTAGTAAAAGAATTAGTAAAAATAATTGCATCAATAGTTCAAGAATTTACACAAACAGGTGGGGTAAGACCATTTGGTTTATCT…	MADGEYSFSLTTFSPTGKLVQIEYALNRVSSSSPALGIRAKNGVIIATEKKSPNELIEENSIFKIQQISEHIGIVYAGMPGDFRVLLKRARKEAIRYSLQYGSEILVKELVKIIASIVQEFTQTGGVRPFGLSLLICGVDVYGYHLYQIDPSGCYFNWMATCVGKDYQNNMSFLEKRYNKDIEIEDAIHTAILTLKESYEGVLNEKNIEIGVAYDNKPFKILTQNEIKDYLIEIE	235	0	null	no	GO_0005839, GO_0019773	GO_0005839	GO_0005839,GO_0019773,GO_0005839	0	0	0	0	0	0	0	0	0	0	0	0	0	0	0	0	0	0	0	0	0	0	0	0	0	0	0	0	0	0	0	0	0	0	0	0	0
1830	PF3D7_0807500	proteasome subunit alpha type-6, putative	null	ATGGTAAGGCCTTCACAGAGTATGTATGATAGACACTTGACGATTTTTTCTCCAGATGGGAATTTATATCAAATAGAATATGCTATAAAAGCAGTAAAAAATACAAATATAACCTCCGTAGGAGTAAAGGGAGAAAATTGTGCTGTAATAATTTCCCAAAAGAAAATGGCTACACAATATATTTCTCAAGATAAATTATTAGATTATAATAACATAACTAATATATATAATATAACAGATGAAATAGGATGCTCAATGGTAGGTATGCCAGGAGATTGTTTAAGTATGGTTTATAAAGCTAGATCAGAAGCATCCGAATTTTTATATAGTAACGGATATAATGTAAATGCCGAAACGTTATGTAGAAATATTTGTGATAAAATACAAGTGTATACACAA…	MVRPSQSMYDRHLTIFSPDGNLYQIEYAIKAVKNTNITSVGVKGENCAVIISQKKMATQYISQDKLLDYNNITNIYNITDEIGCSMVGMPGDCLSMVYKARSEASEFLYSNGYNVNAETLCRNICDKIQVYTQHAYMRLHACSGMIIGIDENNKPELFKFDPSGFCAGYRACVIGNKEQESISVLERLLEKRKKKIQQETIDEDIRNTTILAIEALQTILAFDLKASEIEVAIVSTKNRNFTQISEKEIDNYLTYIAERD	260	0	null	no	GO_0005839, GO_0019773	GO_0005839	GO_0005839,GO_0019773,GO_0005839	0	0	0	0	0	0	0	0	0	0	0	0	0	0	0	0	0	0	0	0	0	0	0	0	0	0	0	0	0	0	0	0	0	0	0	0	0
4412	PF3D7_1353800	proteasome subunit alpha type-4, putative	null	ATGGCAAGAAGATATGATAGTAGAACAACTACCTTTTCTCCAGAAGGAAGGTTATATCAAGTAGAATATGCTTTGGAAGCCATAAATAATGCAAGTATAACAATTGGTTTAATAACAAAGGATGGAGTAATATTAGGAGCGGATAAAGTTTTTATTTCAAAATTAATTGATAAAGCTAATAATTATGAAAAAATATATAAAATTGATAAACACATATTTTGTGGTGTAGCAGGATTGAATGCTGACGCAAATATTTTAATAAACCAATCTAGATTATATGCACAAAGATATTTATATAATTATAATGAAGTACAACCAGTATCACAATTAGTAGTTCAAATATGTGATATCAAGCAAAGTTACACACAATATGGTGGATTAAGACCATATGGTGTTAGC…	MARRYDSRTTTFSPEGRLYQVEYALEAINNASITIGLITKDGVILGADKVFISKLIDKANNYEKIYKIDKHIFCGVAGLNADANILINQSRLYAQRYLYNYNEVQPVSQLVVQICDIKQSYTQYGGLRPYGVSFLIGGYDTKDGYQLYHTDPSGNYSGWFATAIGTNNLTASSVLKQEWKNDMTLEEGLLLALKTLAKSTDTEIPKSEKIELAYLTNKDGEVYQKYLTEKEIEELIKLYTQKYIKE	246	0	null	no	GO_0005839, GO_0019773	GO_0005839	GO_0005839,GO_0019773,GO_0005839	0	0	0	0	0	0	0	0	0	0	0	0	0	0	0	0	0	0	0	0	0	0	0	0	0	0	0	0	0	0	0	0	0	0	0	0	0
4413	PF3D7_1353900	proteasome subunit alpha type-7, putative	null	ATGTCTTATGATAGAGCTATAACAGTTTTTAGTCCTGATGGACATTTGCTACAAGTAGAACATGCCTTAGAAGCAGTTAAAAAAGGTGGTTGTGCTGTAGCTATAAAAAGTTCAAATTTCGCTGTTTTAGCAGTCGAAAAAAAGAATATACCTAAATTACAAAACCCAAAAACTACTGAAAAATTGATTAAATTAGATGAACATAATTGTTTAGCCTTTGCTGGTTTAAATGCTGATGCAAGAGTATTAGTCAATAAGACTCGATTAGAATGCCAAAGATATTATTTAAATATGGATGAACCGGCACCTGTAGATTATATTGCAAAATATGTTGCAAAAGTACAACAGAAATTTACACATAGGGGTGGTGTAAGACCATTTGGTATAGCCACACTAATA…	MSYDRAITVFSPDGHLLQVEHALEAVKKGGCAVAIKSSNFAVLAVEKKNIPKLQNPKTTEKLIKLDEHNCLAFAGLNADARVLVNKTRLECQRYYLNMDEPAPVDYIAKYVAKVQQKFTHRGGVRPFGIATLIAGFKNNKEICIYQTEPSGIYAAWKAQAIGKNAKIVQEFLEKNYQENMEQKDCIFLALKAIFEVVELSSKNVEVALLTEKDLTFIEEQEINSMVELIDQERTKNNEQNE	241	0	null	no	GO_0005839, GO_0019773	GO_0005839	GO_0005839,GO_0019773,GO_0005839	0	0	0	0	0	0	0	0	0	0	0	0	0	0	0	0	0	0	0	0	0	0	0	0	0	0	0	0	0	0	0	0	0	0	0	0	0
5320	PF3D7_1474800	proteasome subunit alpha type-1, putative	null	ATGTATCGAAATTTATATGATACAGACAATATAATTTACTCTCCAGAAGGAAGATTGTACCAAGTAGAATATGCAAGTGAAGCAATAAAACAAGGAACATGTGCAGTAGCTATAAAGTCAAAGGATTATGTGGTTGTGAGTGGATTAAAGAAATGCATTAGTAAATTATCTTTTCCTCAAGAGAAGATATTTAAAATTGATGATTATATTGGTATTAGTATGAGTGGAATTACTTCTGATGCTAAGGTTTTAACAAAATTTATGCAGAATGAATGTTTATCTCATAAATTTTTATATAATGAAAATATAAATATTGAATCCTTAGTAAGAAGTGTAGCAGATAAATATCAGAAGAATACACAAAAAAGTAGTAAGAGAGCATTTGGAGTAGGGTTAATG…	MYRNLYDTDNIIYSPEGRLYQVEYASEAIKQGTCAVAIKSKDYVVVSGLKKCISKLSFPQEKIFKIDDYIGISMSGITSDAKVLTKFMQNECLSHKFLYNENINIESLVRSVADKYQKNTQKSSKRAFGVGLMIAAYHNEPCIFETRPNGSYFEYDALSFGARSHASKTYLEKNLHLFEECSLEELILHCLKALKCSLSSESELTISNTALAVVGKNHPWQEISSLQLEEYLSKVKMDAEQEQVEENVQNEANE	254	0	null	no	GO_0005839, GO_0019773	GO_0005839	GO_0005839,GO_0019773,GO_0005839	0	0	0	0	0	0	0	0	0	0	0	0	0	0	0	0	0	0	0	0	0	0	0	0	0	0	0	0	0	0	0	0	0	0	0	0	0
742	PF3D7_0415900	60S ribosomal protein L15, putative	null	ATGGGAGCTTATAAGTACATTCAAGAAATATGGAAAAAAAAGCAATCTGATGCTATGCATTTTTTGTTAAGAGTTAGAACATGGGAATATAGGCAACTCCCTGTTGTTCATAGAGTATCCAAACCCAGTAGACCAGATAAAGCACGTCGCTTAGGATATAAGGCCATACAAGGATTTGTGATTTATAGAGTACGTGTTAGAAGAGGTGATAGAAAAAAAAGAGTTAAAAAAGGTATTGTGCACGGGAAACCCAAACACCAAGGTGTTCACAAACAAAAATCAACAAGAAATTTAAAAAGTGTAGCTGAAGGAAAAGTTGGAAAAAGTATATGTGGAAATTTACGTGTTTTAAATAGTTATTGGGTAGGTCAAGATGCTGTTTATAAATATTATGAAGTT…	MGAYKYIQEIWKKKQSDAMHFLLRVRTWEYRQLPVVHRVSKPSRPDKARRLGYKAIQGFVIYRVRVRRGDRKKRVKKGIVHGKPKHQGVHKQKSTRNLKSVAEGKVGKSICGNLRVLNSYWVGQDAVYKYYEVILVDPNHNAVRNNPKINWICNPVHKHRELRGLTSAGKKYRGLRVKGHLSAKSRPSIRANWKRRQLIKLRKCR	205	0	null	no	GO_0005622, GO_0005840	GO_0005840	GO_0005622,GO_0005840,GO_0005840	0	0	0	0	0	0	0	0	0	0	0	0	0	0	0	0	0	0	0	1	0	0	0	0	0	0	0	0	0	0	0	0	0	0	0	0	0
3104	PF3D7_1124400	U6 snRNA-associated Sm-like protein LSm1, putative	LSM1	ATGGAGCATTCGTCTATGCCCTTATGGTTAAGTAGCTTTGAAGAAGAAATTGACACTTACATTTTTATTTCATCACGTGATAATAAATTATATTTAGGTATATTAAGAACTTATGATCAACATGGGAATGTTTTTTTAACTCACTGTGTTGAAAAAATAATCGTTCCTGAAAAAAATTATTTTTCAGACGTATATGTGGGAAATTTAATTATTAGGGGAGATAATATTGCCTATTTTGGATCTGTAGATGAAGAAAAATATTGTAAAATGTTTGACTATACTATAAAAAATGATAATGATGAGGAACATAATAATATGGATATGATAAAAAATAAAAAAGAATATTCTAGTAGCGAAAATATTATTCTGGTATATAAACCAATTAATCATATATTAAAA…	MEHSSMPLWLSSFEEEIDTYIFISSRDNKLYLGILRTYDQHGNVFLTHCVEKIIVPEKNYFSDVYVGNLIIRGDNIAYFGSVDEEKYCKMFDYTIKNDNDEEHNNMDMIKNKKEYSSSENIILVYKPINHILKFIPENNADSSIFEN	147	0	null	no	GO_0005634, GO_0030529	GO_0005845	GO_0005634,GO_0030529,GO_0005845	0	0	0	0	0	0	0	0	0	0	0	0	0	0	0	0	0	0	0	0	1	0	0	0	0	0	0	0	0	0	0	0	0	0	0	0	0
1716	PF3D7_0728000	eukaryotic translation initiation factor 2 subunit alpha, putative	null	ATGACTGAAATGCGAGTAAAAGCAGATTTGGGGGACTGTCGTTTTTATAAAAAGAAGTTTCCCGAGGTTGATGATTTGATTATGGTTAAGGTTAATAGAATTGAGGATATGGGAGCTTACGTTTCTATATTGGAATATAACGATATGGAAGGTATGATTTTAATGTCCGAACTATCCAAAAGAAGATTCAGAAGTGTGAACAAATTAATACGTGTAGGTAGGCATGAGGTTGTACTTGTATTAAGAGTAGATAGCCAAAAAGGATATATCGATTTATCAAAAAGGAGAGTATCACCAAAAGATATAATAAAATGTGAAGAAAAATTTTCTAAATCTAAAAAGGTGCACCAGACTGTGCGACATGTAGCAAAAGAACATGGCATTACTGTAGAAGAGCTA…	MTEMRVKADLGDCRFYKKKFPEVDDLIMVKVNRIEDMGAYVSILEYNDMEGMILMSELSKRRFRSVNKLIRVGRHEVVLVLRVDSQKGYIDLSKRRVSPKDIIKCEEKFSKSKKVHQTVRHVAKEHGITVEELNEKAIWPLYERYGHALDALKEATMNPENVFKGLDISEEIKNSLLKDIKLRLTPQALKLRGRIDVWCFGYEGIDAVKEALKKGKEISNDKVSINIKLIAPPQYVIVTSCHDKDLGMAKIQEAMKVISDKIKEYKGGDFKQQGEILVIGGDEEKRLEELLDKHDGISSDDDDYNTSDEDDENSSEEDENTSEDEEEED	329	0	null	no	GO_0005850	GO_0005850	GO_0005850,GO_0005850	0	0	0	0	0	0	0	0	0	0	0	0	0	0	0	0	0	0	0	0	0	0	0	0	0	0	0	0	0	0	0	0	0	0	0	0	0
2539	PF3D7_1007900	eukaryotic translation initiation factor 3 subunit D, putative	EIF3D	ATGTCGAGTTTTAATTTGGTCGGAGTCATTAATAACAGAACGTGGGGACCTGATTCAAAAAATGAGGAACTTGTAAATTATTGTATGCCGGACATAAAAAAATATCAATTTGAACCTTCTATGAAATTTGAAAGGATAGGAAAAGTATGTGATTTTACTATGAATAGTTATCAAAAGAATACGAAGGATATAAATAAAAATTCGAATGATGTTAATGCGTTTGAAGAAGAGTTACAATTTCAGACGGTGGATTTACGTACAGGTCAAAAACAGAAAGGTAGTATATTTAATAAGAAAAAGATACATAATAAACAAAATACTACACAAGCCTTTACACAGAAACAACAAGAAGAAGATAATTTATATAGTAGTAGAATAAAAACAGCTGAACAAAAGAAA…	MSSFNLVGVINNRTWGPDSKNEELVNYCMPDIKKYQFEPSMKFERIGKVCDFTMNSYQKNTKDINKNSNDVNAFEEELQFQTVDLRTGQKQKGSIFNKKKIHNKQNTTQAFTQKQQEEDNLYSSRIKTAEQKKQKLLQQAKTARINARHRIFTEWSIEPTPLWTVECEIMFNELPKKIIKIDNLKVEDLFFKGKSLFYDKKIENINVKNPPLLFHHTKEGINLIPKTKEDHNLINILNNENKNKIISNEEDPNNINNIIVISTDQILSCLMSCVQSKYSWHLLIKKKGNQIIIDKDDDSIIDLLTVNENSIDAPTQDNENKINSLQALGIEAVKINQRFRKQVILKNDIAEEFEPGNFNIKNIKINDILYRYRKFQIPPLVQSNNKKTYTLITRGEIHS…	543	0	null	no	GO_0005737, GO_0005852	GO_0005852	GO_0005737,GO_0005852,GO_0005852	0	0	0	0	0	0	0	0	0	0	0	0	0	0	0	0	0	0	0	0	0	0	0	0	0	0	0	0	0	0	0	0	1	0	0	0	0
3417	PF3D7_1206200	eukaryotic translation initiation factor 3 subunit C, putative	EIF3C	ATGCAATCGAAATTTTGGGCCAAGGCAATTGATGAAGATAGTGGGGATAATGTAACAGAATCTTCAGAGAGTGAAGTTGAGGAAAAGAAGCCCATTGTCTCTGCACAGGCAGAAAGGTGGGCCGCCATAGATAGCAGCAGCTCAGAAGAAGAAGAAAGAGTTATTAAAACATATGAAGGGAAAAGGCTACATTTTTATGAGACTACAGGAAATAGTTTAAATGAGAATATGTATAATAATGATTTTAATCTTCTTTTAAAAGATTATGAAAATTTATATAAATTTATGATAAAAGAAAGCGCTGATTGTATCCCTAATTTTGCTATAATATACTTAGATAAATTATCTAAATATGTTGAAAAAACATTCCAGAATAATGTCGAAAAAAAAAATTTGAGC…	MQSKFWAKAIDEDSGDNVTESSESEVEEKKPIVSAQAERWAAIDSSSSEEEERVIKTYEGKRLHFYETTGNSLNENMYNNDFNLLLKDYENLYKFMIKESADCIPNFAIIYLDKLSKYVEKTFQNNVEKKNLSKNKAQTLNKLRAKIRKCSEFYQEKLNLYNENPDDFKDDRKKDMDDDEDDEDNEEDDEEEEEDEEEQEDQDDDNEDEKDQDDDEDGKGKKKLSSKTKSKKGKEKKEEKEDYDDDNDEEKEDEADDDNDDDDDDSDDWSYSEDDNYASDEEDDKTKNAMSKWGLKTSTKVEKKKTVKQKKVKKESTKKEEKANRVVEDSQSAKNKGYAELLSTKNLTEDVIRERVKLVIEKRGRKGLDKHEHINILSKLCEIAKTISTQSYIEVLEHL…	984	0	null	no	GO_0005852	GO_0005852	GO_0005852,GO_0005852	0	0	0	0	0	0	0	0	0	0	0	0	0	0	0	0	0	0	0	0	0	0	0	0	0	0	0	0	0	0	0	0	0	0	0	0	0
4443	PF3D7_1357100	elongation factor 1-alpha	null	ATGGGAAAGGAAAAAACACATATTAACTTAGTTGTTATTGGTCACGTCGATAGTGGAAAATCAACCACTACAGGTCACATTATTTACAAATTAGGAGGTATAGATAGAAGAACTATTGAAAAATTTGAGAAAGAATCTGCTGAAATGGGTAAGGGTAGTTTTAAATATGCATGGGTTTTAGATAAACTTAAGGCAGAAAGAGAAAGAGGTATTACCATTGATATTGCCTTATGGAAATTTGAAACCCCAAGGTATTTCTTTACTGTCATTGATGCACCAGGTCACAAGGATTTTATTAAAAATATGATTACAGGTACATCACAAGCAGATGTTGCTTTATTAGTTGTCCCAGCTGAAGTAGGTGGTTTCGAAGGTGCCTTTTCAAAGGAAGGTCAAACA…	MGKEKTHINLVVIGHVDSGKSTTTGHIIYKLGGIDRRTIEKFEKESAEMGKGSFKYAWVLDKLKAERERGITIDIALWKFETPRYFFTVIDAPGHKDFIKNMITGTSQADVALLVVPAEVGGFEGAFSKEGQTKEHALLAFTLGVKQIVVGVNKMDTVKYSEDRYEEIKKEVKDYLKKVGYQADKVDFIPISGFEGDNLIEKSDKTPWYKGRTLIEALDTMEPPKRPYDKPLRIPLQGVYKIGGIGTVPVGRVETGILKAGMVLNFAPSAVVSECKSVEMHKEVLEEARPGDNIGFNVKNVSVKEIKRGYVASDTKNEPAKGCSKFTAQVIILNHPGEIKNGYTPVLDCHTSHISCKFLNIDSKIDKRSGKVVEENPKAIKSGDSALVSLEPKKPMVVE…	443	0	null	no	GO_0005737	GO_0005853	GO_0005737,GO_0005853	0	0	0	0	0	0	0	0	0	0	0	0	0	0	0	0	0	0	0	0	0	0	0	0	0	0	0	0	0	0	0	0	1	0	0	0	0
548	PF3D7_0319600	elongation factor 1-delta, putative	EF-1delta	ATGGCAAATACGTATGATGAATTATATGTACCTTTAAGTTATTATATTCTACAAAATGAGGGAGGAAATACCAGTAAAATAGATCAAGCTAATACTAAGAAACCCAAAAAGAAGGAAGTTATTAATAAGTCATCCCTAATTATTGATATAAAACCCTATGGTGAAAATACAGATCTTGATGAGGTGTTAAAACTTGTAAAAAATATAACAATGGAAGGATTAACTTGGGGAAAAGCTCATAAGAAAACACCCTTCGCCTTTGGACTTTTCAAATTACAAGTATCTTGTGTTATAGTAGACGATTTAGTTAATACAGATGAACTTATAGAAACGATTGAAAACCTTGGATTGGATAATGAACAGTTACAAAAGAAAAAACAAATGGATGATGATGAAGAA…	MANTYDELYVPLSYYILQNEGGNTSKIDQANTKKPKKKEVINKSSLIIDIKPYGENTDLDEVLKLVKNITMEGLTWGKAHKKTPFAFGLFKLQVSCVIVDDLVNTDELIETIENLGLDNEQLQKKKQMDDDEENYDEDDEIGGLVQSAEIISFNKL	156	0	null	no	GO_0005853	GO_0005853	GO_0005853,GO_0005853	0	0	0	0	0	0	0	0	0	0	0	0	0	0	0	0	0	0	0	0	0	0	0	0	0	0	0	0	0	0	0	0	0	0	0	0	0
2213	PF3D7_0913200	elongation factor 1-beta	EF-1beta	ATGGCTAGTAACGCAAGTTTATTAAACGTTAAAGGAGAAGAGGACTACCATAACCTAAACTCCTTTTTTGAATCTCACTCCTATGTGGATAATTATTCGGTTGGTTTCAAGGATATAAAAATATATCACCAAATAAAAACAGTTATTAAAAAAGATACGTATCCTCATTTGTTTAGATGGTTTCATCATATATCATCACTACCAGAATTTATATTAAACCAATATGATGAAGAACATAATAAAAAGAAAGGTAATAGTGGTACTAATACTACAACTTGTACAAACAAGAAAAGTAATAAAGCTGCAGGAGGTGATGATGATGATGATAATGATATAGATCTTTTTGGTGATGATGATGATAATACAAAAGATTCTGCTTCTAATCTTTTATTAGAAAAG…	MASNASLLNVKGEEDYHNLNSFFESHSYVDNYSVGFKDIKIYHQIKTVIKKDTYPHLFRWFHHISSLPEFILNQYDEEHNKKKGNSGTNTTTCTNKKSNKAAGGDDDDDNDIDLFGDDDDNTKDSASNLLLEKKKQKEEELKKKKQKEKEKNRSILIIEIKPKSIDTDIAKIPKLVKQKIVDENIKWGEEVKKLPVAFGLYKLHMSCIIYDDFVNTNELIEKIENIDLDNEEDKKKRTLILGLDEDDENYDENAEEVEDDLEFLVQSAEIISFNKL	276	0	null	no	GO_0005853	GO_0005853	GO_0005853,GO_0005853	0	0	0	0	0	0	0	0	0	0	0	0	0	0	0	0	0	0	0	0	0	0	0	0	0	0	0	0	0	0	0	0	0	0	0	0	0
3490	PF3D7_1213600	dynein light chain 1, putative	DLC8	ATGGCTGATAGAAAATCTAATAAAAATGCAGTTGTAAAAAATGTAGATATGACAGAAGAAATGCAAATTGATGCTATTGATTGTGCTAATCAGGCCTTACAAAAATATAACGTCGAAAAAGATATTGCTGCACATATTAAAAAAGAATTTGATAGAAAATATGACCCAACTTGGCACTGTGTTGTAGGAAGAAATTTTGGATCTTATGTTACTCACGAAACCAAAAATTTTATATATTTTTATATTGGACAAGTAGCTATATTATTATTTAAATCGGGATGA	MADRKSNKNAVVKNVDMTEEMQIDAIDCANQALQKYNVEKDIAAHIKKEFDRKYDPTWHCVVGRNFGSYVTHETKNFIYFYIGQVAILLFKSG	93	0	null	no	GO_0005875	GO_0005868, GO_0005875	GO_0005875,GO_0005868,GO_0005875	0	0	0	0	0	0	0	0	0	0	0	0	0	0	0	0	0	0	0	0	0	0	0	0	0	0	0	0	0	0	0	0	0	0	0	0	0
2546	PF3D7_1008700	tubulin beta chain	null	ATGAGAGAAATTGTTCATATTCAAGCTGGCCAATGTGGAAATCAAATAGGTGCAAAGTTTTGGGAAGTCATTTCTGATGAGCATGGAATAGATCCAAGTGGTACCTATTGTGGGGACAGTGACTTACAGTTAGAAAGAGTTGACGTTTTTTACAACGAAGCAACAGGAGGTAGATATGTTCCAAGAGCTATATTGATGGACTTGGAACCTGGTACTATGGATAGTGTTCGTGCTGGCCCCTTTGGTCAATTATTTCGTCCAGATAATTTTGTGTTTGGTCAAACAGGTGCAGGAAATAATTGGGCTAAAGGACATTATACTGAAGGTGCTGAATTGATAGATGCAGTTTTAGATGTCGTTAGAAAAGAAGCAGAAGGTTGTGATTGTTTACAAGGATTT…	MREIVHIQAGQCGNQIGAKFWEVISDEHGIDPSGTYCGDSDLQLERVDVFYNEATGGRYVPRAILMDLEPGTMDSVRAGPFGQLFRPDNFVFGQTGAGNNWAKGHYTEGAELIDAVLDVVRKEAEGCDCLQGFQITHSLGGGTGSGMGTLLISKIREEYPDRIMETFSVFPSPKVSDTVVEPYNATLSVHQLVENADEVQVIDNEALYDICFRTLKLTTPTYGDLNHLVSAAMSGVTCSLRFPGQLNSDLRKLAVNLIPFPRLHFFMIGFAPLTSRGSQQYRALTVPELTQQMFDAKNMMCASDPRHGRYLTACAMFRGRMSTKEVDEQMLNVQNKNSSYFVEWIPHNTKSSVCDIPPKGLKMAVTFVGNSTAIQEMFKRVSDQFTAMFRRKAFLHWYT…	445	0	null	no	GO_0043234	GO_0005874	GO_0043234,GO_0005874	0	0	0	0	0	0	0	0	0	0	0	0	0	0	0	0	0	0	0	0	0	0	0	0	0	0	0	0	0	0	0	0	0	0	0	0	0
5329	PF3D7_1475700	tubulin epsilon chain, putative	null	ATGGTTAGGGAAATAATATTTTTACATGTGGGACAATGTGGGAATCAATTAGGACATGAGTTTTGGTCTGTTGCCATAAAGGAACAGTTAAATAAAAAACTGAATGATAAGAAAGAATGTTTGAATAAAAATATATTTTTGAACGATTCCATGTCTTCTTTTTTTTTTGAAGAATTAAAGGAAAATAATAATTGTAGTAAGAAAGAAAATTTGAAAGCTCGCGCTATATTGATAGATACCGAAACAGGTGTAGCAAATGAAATTATGAAAAGTACGATTTCTCCATATATTGATGAAAATAATATTTTTACACAGCAGTCTGGTGCAGGTAATAATTGGTCTCAAGGATATATGTATTATGGTAAAATGTATGAAAATATTATTGATAATATTATAAGA…	MVREIIFLHVGQCGNQLGHEFWSVAIKEQLNKKLNDKKECLNKNIFLNDSMSSFFFEELKENNNCSKKENLKARAILIDTETGVANEIMKSTISPYIDENNIFTQQSGAGNNWSQGYMYYGKMYENIIDNIIRRNVEKCDSLQSFYITSSLGGGTGSGLGSYILEMLSDTFREIKFSNCVFPSVCDDVITSPYNSFFALNKIHEFSNCVLPVSNDALLNILNSKKLREIDKTVKNNNINSVNDKNTSIVKNDYSKMNNIVANVILNLTSSMRFEGSLNVDINEICTNLIPYPFFNFLLSSLSPCIESESIRTFDHLFKNVLSQNNQMLIANPKDGLSLSMAFLVRGNINISDVTKNVLLIKNNLNILKYNKDATKIGICNVSPLNQPYSLLCLINSCEI…	519	0	null	no	GO_0043234	GO_0005874	GO_0043234,GO_0005874	0	0	0	0	0	0	0	0	0	0	0	0	0	0	0	0	0	0	0	0	0	0	0	0	0	0	0	0	0	0	0	0	0	0	0	0	0
1735	PF3D7_0729800	dynein light chain, putative	null	ATGGAAGAACCTAAATGTGATATTTTATATGAACATATGAATTATGAAAATAAAATAAAATTAATTAACATAGCAAAGGAAATATATATAAATATAAATAATAATAAAATAAATTCTTGGAGAAATGCAACTATAGCTTTAAGAGATAAAATAAAGGAAGTTTTAGATTTTAACGAAAAAGGTTGGCATATAATAATTGGATCCAAATTTGGATTTTTTTGTACTCATGAAATTTATCATGCTTTGCATTTTAAATTAGATCATATAGAGTTCCTTATTTTTAAACATGGATAA	MEEPKCDILYEHMNYENKIKLINIAKEIYININNNKINSWRNATIALRDKIKEVLDFNEKGWHIIIGSKFGFFCTHEIYHALHFKLDHIEFLIFKHG	97	0	null	no	GO_0030286, GO_0005875	GO_0005875	GO_0030286,GO_0005875,GO_0005875	0	0	0	0	0	0	0	0	0	0	0	0	0	0	0	0	0	0	0	0	0	0	0	0	0	0	0	0	0	0	0	0	0	0	0	0	0
4445	PF3D7_1357300	dynein light chain, putative	null	ATGGAATCGAGTGAAGTGAAAAAGTATTCATCCAAATTTGAAATAAAAGGCATATGTATGAATAGTGAAAATTGTGAAAAGGTATGTAAAATAAGTTTGAAAGCAATAAAAGAAAATAAATTTGAAAAAGATATAGCTTGTCAAATAAAAACAAAATGTGAAAATGATGAAATATTAAATAAGGATAATTTAAATGATGAAAATTATTTAAATGTTATTGACAATTTAAAAAATCAAAACATAGGTTCATGGCAATGTATAGTTGGACAAAATTTTGCTTTCTCCATTAATTATCAGTTTAATTGTATGATTTACTTTCAACATAGATCTACTAAACTAAGCATTTTGATATATAAATCTTTATAA	MESSEVKKYSSKFEIKGICMNSENCEKVCKISLKAIKENKFEKDIACQIKTKCENDEILNKDNLNDENYLNVIDNLKNQNIGSWQCIVGQNFAFSINYQFNCMIYFQHRSTKLSILIYKSL	121	0	null	no	GO_0030286, GO_0005875	GO_0005875	GO_0030286,GO_0005875,GO_0005875	0	0	0	0	0	0	0	0	0	0	0	0	0	0	0	0	0	0	0	0	0	0	0	0	0	0	0	0	0	0	0	0	0	0	0	0	0
2965	PF3D7_1110700	actin-like protein, putative	ALP1	ATGGAGAACAAGACAATAGTAATTGATAACGGTTCAGGATATATAAAGGCGGGAATAAATTCAAGTGAAGAACCAACCATTGTGTTCCCAACTATAGTAGGGATTGAAAAGAACGACGAAACTAAAAGGATATATACAGGTGATGAAGCATTTTTTCATGAATCGAATTTAAATATTTATCGTCCTATTGATCATGGACATATAAGTGATTGGGATAAAGCTCAAAAGGTTTGGGATTATACATTAAATTGTGTAGATCCTAGTAAGAGTATAAAAGACATATTATTAACAGAACCTCCTTTATGTTCTATATCTCATCGAAAAAAAATGGGAGAAATATTTTTTGAATATTTTGATACTTTGAATCTTAATTTATCTGTTTCTGGATTAATGTCTTTA…	MENKTIVIDNGSGYIKAGINSSEEPTIVFPTIVGIEKNDETKRIYTGDEAFFHESNLNIYRPIDHGHISDWDKAQKVWDYTLNCVDPSKSIKDILLTEPPLCSISHRKKMGEIFFEYFDTLNLNLSVSGLMSLYASGLTTGLVLDIGEGVTQCLPVFDGYIEKNSIIRSDFGGEELSMFLQKLICDIGYSMTTTKSLEYVKNIKETICFCSLNPSEDQLRNDLAATYTLPDGDVLRDGYDSIEIAHERFYVAEALFNPQLCHRDNLSIIDIIWKSILSCPMENRKILSSSIVLSGGSSLFPNLVERIETEVRNNAPESARSMVKVHALENRAIMAWCGAQIFSQAELRESQTGIWISKEEYEEIGSNIFLTKASLKLT	378	0	null	no	GO_0005737, GO_0005856	GO_0005884	GO_0005737,GO_0005856,GO_0005884	0	0	0	0	0	0	0	0	0	0	0	0	0	0	0	0	0	0	0	0	0	0	0	0	0	0	0	0	0	0	0	0	1	0	0	0	0
3048	PF3D7_1118800	actin-related protein 2/3 complex subunit 1, putative	ARC40	ATGATAGATCATTTAAAATGCAATTGCATAAAATACAATATCCCTGACGAAGACTGTGAACCTGTAATAAAGGTATCAGAAAATAAAGATGATATGTTAGTAGCTGTTTCGAGTAATAAAAGAAATATCCTTCTATATAAAATAATAAATAGGGAGATAATATACTCAGACACTTTCTATATAGGAGATCCAAACAAAATTATTGCCTTAGAATGGTCTAAACAAAACGATTTACTTATAGTTACAATAGATATGAAATGTATAATATATAAAAAAAAAGAGAATGGAAAATGGGAATGTACTAATGTGAATATACCAACAGAAGATTTACCTACATGTGCTTGTTGGCATCCTCATACGTATTCATTTGCAATAGGATTTACTTCTGGTATTATATTT…	MIDHLKCNCIKYNIPDEDCEPVIKVSENKDDMLVAVSSNKRNILLYKIINREIIYSDTFYIGDPNKIIALEWSKQNDLLIVTIDMKCIIYKKKENGKWECTNVNIPTEDLPTCACWHPHTYSFAIGFTSGIIFICSKKENQKWKIKKINNHVASVMFIDWSSSGYILSTNSLDSTSLLVCTSGLLDDNIKNRNNIKIYKNMETFITERNIHNNDIIYKIESEGYIFLHSSFSFSNEKIAIIATNFESTYEKQQIIILDYFKSPANTQYVSWVGQTLQRCLFLDDDKLLVYGYEIFPIIVEYLNDEWIISKVVLPEFNIKNLTVDFFYDQKEIQEIEQECEHLDGNEIIGEIVAHSNYILQISMLEPYENKIYIEFITVSSDFSIVLWNFSI	391	0	null	no	GO_0005737, GO_0005856	GO_0005885	GO_0005737,GO_0005856,GO_0005885	0	0	0	0	0	0	0	0	0	0	0	0	0	0	0	0	0	0	0	0	0	0	0	0	0	0	0	0	0	0	0	0	1	0	0	0	0
59	PF3D7_0106700	small ribosomal subunit assembling AARP2 protein	AARP2	ATGGATGATAAAAAGAAACATCACAAGAAAAAGAAAGTAGGTAAGAAGAGCAAAAAAAAAAAGATTAACAAGAATGGAAACAATAAAAAATATCATAAAGCTTTTGCATTTAGTGGAGGTATAAAAAGTGCTCATAGAAGAAAACAACATTTATTTGAATTAGAAGAAAAAAAGTTAAGAGTACAAAAAGTTTATAAAGAAGGTAATAAGAGTAGCCCTTTAATTGTAGTAATTCAAGGTGCTAAAGGTGTTGGTAAAAGTACTTTATTAAAAAGTTTAATAAAATATTATGTAGGAATAACAATAAATAATATTAAAGGACCTATATCTATTTTTACAAAAAATTTAAAAAGATATACATTTATCGAAGTTAACGATGATATATTACATATGATAGAT…	MDDKKKHHKKKKVGKKSKKKKINKNGNNKKYHKAFAFSGGIKSAHRRKQHLFELEEKKLRVQKVYKEGNKSSPLIVVIQGAKGVGKSTLLKSLIKYYVGITINNIKGPISIFTKNLKRYTFIEVNDDILHMIDVAKIADICILVIDGSYGIELETLEFLNILYTHGLPKVLGVVTHLDKFKDSKSIRKRKKKLNKRYSEELVEGSKLFFLSGIQNNRYNKTEIRNLCKFLSVIKKPIISWREQHGYILGLKLDVDDLLINNQITSQKNNLQSEHVHNENYVNHASYDNDNDNDEENEKKLTNFLTNCDEKIKISIEGYVYGSKIYKNQKVHIPNIGDVEIDNIQILQEPFKLDEQKKNPNIYAPMSDVGNLTFDFDNMYIHIPKNKVNFTREEFLLADQ…	1434	0	null	no	GO_0005634	GO_0005886	GO_0005634,GO_0005886	0	0	0	0	0	0	0	0	0	0	0	0	0	0	0	0	0	0	0	0	1	0	0	0	0	0	0	0	0	0	0	0	0	0	0	0	0
2688	PF3D7_1022300	ZIP domain-containing protein, putative	ZIPCO	ATGTGGTTATCAACATTTCTAGCCTTACTTATTTTTGTGGAATGCGTTATAGTTGTGTATATACCAGCATATATAGAAAGTAAATTATCAAAAATTAAGAAAAACAGATTTTTTAATATGGAAAATTTTGAAAACATAGCAAGTGGCGCGATATTAGCTTTAGCCTTTTTGCATATGTTACCAGAAGTTATAATTTTATCCAACAAAAAAAATATGAATCTGTATTATATTTTTATATTAGTACTTGTATCTGTAACTTTTTTGAATATAACGGATATACTATATGATCATCACTTTGAAAGTACTTTTGATGTTAATTGTACACTAGCATGTGAAAATTCAAACAATCAAATTAAAAACATAAACGATAAAGAAATTACTACAAATTATATAGACATA…	MWLSTFLALLIFVECVIVVYIPAYIESKLSKIKKNRFFNMENFENIASGAILALAFLHMLPEVIILSNKKNMNLYYIFILVLVSVTFLNITDILYDHHFESTFDVNCTLACENSNNQIKNINDKEITTNYIDIKSNEVIDLELKAMDTNINNNNNNNNNNKTDPCKTNIFFEIFKSNSFFIVLSLFIHSFIEGLLMGSLKDKNAIIIVGLSMLAHKWAECLIVYKNVVNKIENPLLASIYAWSFILSLPLGVFIAIFSFPSNEFVEIIFSSIACGFFLYLSFNMTKEIKITKSNKHFISFSYFLGVGGMSTLMILFNSFESNNII	325	7	HMM: MWLSTFLALLIFVECV, NN: MWLSTFLALLIFVECVIVV	yes	GO_0016020	GO_0005886	GO_0016020,GO_0005886	0	0	0	0	0	0	0	0	0	0	0	0	0	0	0	0	0	0	0	0	0	0	0	0	0	0	0	0	0	0	0	0	0	0	0	0	0
5228	PF3D7_1465500	potassium channel K2	K2	ATGAAAAGCGGATTATTTTCTATGAATGATATTTTTTTTTTAGTGAATAGTATATTCAAATATTTTCTTATCTTATTGAACGGATCTCATTTACTAAAGTTGTTATATTCCTCAAAGGAAAACATTCACATTATTGAAGGATTATTATGTATAATAACAGGTGTTATATTAAAGCTTTCACTTATATATATATACTGTACCTATTTTATGAATATATATATAATAAAAGATTATAGAAGAAAGAATGTACTGAATATTTTTAATATGAATAATAATTATAAAAGAAACGGGAATGTTATTGAATCGGATGATTTTGAGTATAGAAAATTAATAAAGAAGTTTTTTTTTAAAAAGGTATATTATTCAATTAAGAAGAAACATAAAAGAATAGAATTATAT…	MKSGLFSMNDIFFLVNSIFKYFLILLNGSHLLKLLYSSKENIHIIEGLLCIITGVILKLSLIYIYCTYFMNIYIIKDYRRKNVLNIFNMNNNYKRNGNVIESDDFEYRKLIKKFFFKKVYYSIKKKHKRIELYMLKIYNSNFNYYFCNIRDMCYTIIWYISLYYWRRDTYNMIWGFNKIPTYIYNMLLILLSTSYIDLVMVIISYNKSKYYLMKSKLLIDIFFSAPCTYLFSKFIFVFEHQIDIYFMMGFLRNIKIFLNVSYVRIEHNSILTNTEIKIIRIVLGVLLLCNAFASTIYTIQAIHPYNLDNENFNYFLNSYLDYFYFSIISISTVGYGDIFPINKLSKVVCIIFIFWTFIWVPIQFNDLIISIFSKKKTYGKISMNNQKFILLIGDVEPQQ…	1461	7	null	no	GO_0016020	GO_0005886	GO_0016020,GO_0005886	0	0	0	0	0	0	0	0	0	0	0	0	0	0	0	0	0	0	0	0	0	0	0	0	0	0	0	0	0	0	0	0	0	0	0	0	0
84	PF3D7_0109300	fatty acid elongation protein, GNS1/SUR4 family, putative	null	ATGATCACAAATATTATAACAAAAACAAATGATGAGTATTTTATGGAGATAATAGGACATATAAGAAATTACCCTAAGAGACCAATATTTTTCATAGAAGAAATATATCCTTTTCTTAATTATATCTCCTTTAAATGGGAGAGAGATTTCAAACCTTTTGACTTTATCCAATTTGTTCATAACAAATATTTCATATGTCCTTTGATAGTAATAATTTATTTATTATTTTGTAAATATGGGAATATTCTAATGAGAGATAAAAAGGCGTTGAATTTGAAAAGAACTATATCCATATGGAATTTTGTTTTATCATTTTTTAATTTGTTAGTAACAATAAAATTGTATCCTGTATTAATATATATCATATATCATTATTCTTTGACAGGTTTATTAATTATT…	MITNIITKTNDEYFMEIIGHIRNYPKRPIFFIEEIYPFLNYISFKWERDFKPFDFIQFVHNKYFICPLIVIIYLLFCKYGNILMRDKKALNLKRTISIWNFVLSFFNLLVTIKLYPVLIYIIYHYSLTGLLIIPPIYTCGFGTVGLWICFFIISKYFELIDTLFLILKKKEITFLHWFHHSTVLLYTWDTYYEEIPVGFIFICINAFVHSIMYFYYFLASCYNKKFKWSIIVTLIQICQMFLGVLLTSYCLYISYIYTYNNKWTVSFVHKLKNNVTFQYGHYISRKNIILASLMYISYLYLFINYFFHRYIISYLMKKKKKT	322	7	null	no	GO_0016021	GO_0005886	GO_0016021,GO_0005886	0	0	0	0	0	0	0	0	0	0	0	0	0	0	0	0	0	0	0	0	0	0	0	0	0	0	0	0	0	0	0	0	0	0	0	0	0
898	PF3D7_0506900	rhomboid protease ROM4	ROM4	ATGGGATCTAATACAGGGTTTAATCCGAAAAATGCCGAGAAAAAAAGAAGCAGCATATTTAGCGATTTAGAAATTCCGCAGGGTGATGTGAAGAAAAAAGCTAGTATATTCAATAATATGGAAAAGAAGAAAATGACTATATTCAAGAAGACAAAGGGTGAAAATAATGAAGAGAAAAAAAAAAGAAGCATATTTAATAATAATAACAATAATAATAATAATAATAATACAATGAAAATTAACATATTTAATAATAATAATGAAAAAAAAGAAAGCTTTTCAATTAATGGAGATGAAAAGAAAAAAAGCTTTTCCATTAATGGAGATGAAAAAAAAGAAAGCTTTTCCATTAATGGAGATGAAAAAAAAGAAAGCTTTTTAATTAACAAAGATGAAAAA…	MGSNTGFNPKNAEKKRSSIFSDLEIPQGDVKKKASIFNNMEKKKMTIFKKTKGENNEEKKKRSIFNNNNNNNNNNNTMKINIFNNNNEKKESFSINGDEKKKSFSINGDEKKESFSINGDEKKESFLINKDEKKESFLINKDEKEKSFSINGDEKKESFSINGDEKKESFSINEDETKKSCSINDDERKISIFSNNEKKKNSIYSDTQSSKREDEKRISIFSDLETSTNIDDISSKRNSQKLSVYGDNKLKKGSLLSPKVDNYRNTIDNINEINDIKIIVTSDENLHTLPSGAVGRRAPLNPFSSPILGKYRRKNKNAKAKVKDPRLNNNPLIGRLTVCISTTAILFWVFFAEMVFNYNTFNGRCISKVLYPIYTENVVLKRQPFFVFLGYGACEYNLD…	759	6	null	no	GO_0016021	GO_0005886	GO_0016021,GO_0005886	0	0	0	0	0	0	0	0	0	0	0	0	0	0	0	0	0	0	0	0	0	0	0	0	0	0	0	0	0	0	0	0	0	0	0	0	0
3024	PF3D7_1116500	folate transporter 2	FT2	ATGATAGAAAAGTCTAACAATCCATTTTTAAGTATCGATCCAATTGTAGAAAGAACAAAATCGAATGGAGAAGGTTTACCATTATTGAGTGAGAAAACAAAAAAAGGTTTTGATTTTACTCAGATCGTTGTATATTTAGTAGGTTTATCAGATGGATTAACACATTTGGCATCTCTGGCTATATATTATTTATTTAAAGATTATTTTAGATTAACTCCATATCAAGTTTCTTTAATATTAATGTATCCATATATCCCTTTTATATTAAAACCTGTGATAGCATTGATAACAGATTCTTTTTCTATATTTGGTATGAGAAGAAAACCATATTTATTTTTATTTAGTTTATTTCAATCATTAAATTTCTTAGCACTAGCGTTTTTAAATTTATCAGTTATA…	MIEKSNNPFLSIDPIVERTKSNGEGLPLLSEKTKKGFDFTQIVVYLVGLSDGLTHLASLAIYYLFKDYFRLTPYQVSLILMYPYIPFILKPVIALITDSFSIFGMRRKPYLFLFSLFQSLNFLALAFLNLSVIQASLILFFISLCASFCTTVAEALVVESSMGQTYSQGTNKVTEFIASKAIGSLSVAYFSGYFLEKMPREYIFIATSIFPLIISLSCLFLKEKEYSTNRNIFNQLSDLIKFINTPIFLGPFLYIFVYMSGPDYDDAFFFFCTNKLGFRPSFMGTLRLTYGIASLIGIIIYRVFLKNCSLRKTLIITTLVSFPIYISPIILTEHINKFLGISNELFVLSGGFLIEAITEIQLLPLFILTANICQPGLEASVFATILSVKNLGSLTKKGT…	455	11	null	no	GO_0016021	GO_0005886	GO_0016021,GO_0005886	0	0	0	0	0	0	0	0	0	0	0	0	0	0	0	0	0	0	0	0	0	0	0	0	0	0	0	0	0	0	0	0	0	0	0	0	0
4287	PF3D7_1340900	sodium-dependent phosphate transporter	PiT	ATGGTCACAGGTCCTGATATGTTATGGTTGGTTATTACGAGTGGCATAGCATGTTTTTTTATGGCCTTTGTTACTGGAGCTAACGACATAGCGAACACATTTAGTACATCTATAGGTTCAAAAGCTATTTCTATAAAAAAGGCATTAATCGTAGCATTTTTTTTTGAAGCATTAGGAGCTTCCTTATTAGGAGGTACGGTTACTGATTCCATACGTTCGAAGATAATAAATTTTCAAGTTTTCTATGACACTCCAGAATTTTTAATGTTAGGAATGTGTTGTGCCCTTATGGGTGCAACGGTTTGGTTAGCTGTAGCAACAAGAGCTGGATTACCTGTATCAACAACACATAGTATTATAGGAGCATTATTAGGTTTTGGATTAGCGACAGGTAATATG…	MVTGPDMLWLVITSGIACFFMAFVTGANDIANTFSTSIGSKAISIKKALIVAFFFEALGASLLGGTVTDSIRSKIINFQVFYDTPEFLMLGMCCALMGATVWLAVATRAGLPVSTTHSIIGALLGFGLATGNMKSIKWEKINNIVISWLAAPILAGTCSAIAFTVLRMLILRKKNSFEIIKKMYWFLIFLITLPFSVFLIFHNPIVINTQCKMKKDGKVIVSSPCYIEDWSAAHSFYASIICILLSSLLTAIGSFVIYIIYNKRINNYNLKKKIFCEELADIEKNPQNNFCAINNSSLNSVASNETQLTQAHNNTSNGTKQNQVGNGTKSNNNNVLVLPGDKNVKSQQDDSKTNGTQKTGSVEAHHVVHIKDNGSEDKSHENMLKKNLDKVTNMNENNN…	687	10	HMM: MVTGPDMLWLVITSGIACFFMAFVTGA, NN: MVTGPDMLWLVITSGIACFFMAFVTGA	yes	GO_0016020	GO_0005887	GO_0016020,GO_0005887	0	0	0	0	0	0	0	0	0	0	0	0	0	0	0	0	0	0	0	0	0	0	0	0	0	0	0	0	0	0	0	0	0	0	0	0	0
542	PF3D7_0319000	P-type ATPase, putative	ATPase7	ATGAAAATATTAGAATGGATATCCTGTACTATCAAAGGAAAACATAATGAGAATAAAATATATTTAATATCTAATTTTGAATTTAATAAAGATGACCATGAATATTATATAAAAAATGCTGAAAACAGGATCAAGGAGGAAGATTTAAATATAGATATAATATATGGGAAGAAACATAAAAACGAAATAAGAACAGCTAAATATAAATTATATAGCTTTTTGCCCTTGATTGTTTTTTTTCAATTTTTAAGATTAGGAAATTTATATTTTTTATCAATATCAATGTTACAATTAATACCTGAAATAACGGATTCGAAAGGAATGCCAACTTATTTAATACCCTTAGTTTTTATAATAGTAGTAGCAATGATTAAAGAATTTTTTGAAGATTGGCAAAGG…	MKILEWISCTIKGKHNENKIYLISNFEFNKDDHEYYIKNAENRIKEEDLNIDIIYGKKHKNEIRTAKYKLYSFLPLIVFFQFLRLGNLYFLSISMLQLIPEITDSKGMPTYLIPLVFIIVVAMIKEFFEDWQRHKSDNEENSKKTMVFVQGELKEKKWADVKDGDVVKIFSYEYFPADLIVLNCSNKKGIVNIETKNVDGESNVKQKYCLPDISKYFSDDKTAGFCRIELISERPNDNIFDYKGYMILPPLQYKNMKNGKLIHFYNTHYKMDDHKDEHDEKGTGKYINKNYKNDYNDKHISYNTNEQNNLSDMTKNDPKEYDYNPQNEINNNNNNNNCDNNNNNCNNNNRFFVDDIKKQGQNEETVDKKKSFFIINNQKKVYDTGSSNNDQITHINNDV…	1864	10	null	no	GO_0016021	GO_0005887	GO_0016021,GO_0005887	0	0	0	0	0	0	0	0	0	0	0	0	0	0	0	0	0	0	0	0	0	0	0	0	0	0	0	0	0	0	0	0	0	0	0	0	0
1602	PF3D7_0715900	cation diffusion facilitator family protein, putative	CDF	ATGCCCACCGAAATGAACTCTTCGTTGCTAGATAACGAAAGCAATTTAAATTTGGTGGATAAGATGTCGCGTTTGTATGACAAGTCTCAAAGAAAAGCAACTAAGAAATTAATTATAGCTAGTATAATATGTATTATTTTTATGGTTATTGAAATAGTAGCAGCAATAGTATCTAATTCTTTATCTTTAATGTCTGATGCTTCTCATTTGTTTTGTGATTTATTATCTTTTGCTTTAAATTTATTTTCTATATATGTTTCAAGTTTTCAAGGGAACGTAGATATGTCTTTTGGTTACCATAGGGCTGAAATTATAGGTGCACTATTTTCTATATTTTTTATATGGTCCTTATCAGCATATATTTTATATACAGCTATATTTAGATTATTTGATGTACCA…	MPTEMNSSLLDNESNLNLVDKMSRLYDKSQRKATKKLIIASIICIIFMVIEIVAAIVSNSLSLMSDASHLFCDLLSFALNLFSIYVSSFQGNVDMSFGYHRAEIIGALFSIFFIWSLSAYILYTAIFRLFDVPKVNGYIMFVTAFISTLANIFMAYVLQVHSHGFGFMNENKCGDHTHETSCHDNSSSLILSDHKNSHNMENGSVKKNFSTKRYKNINSDIIIDENDIRDNKNNISGNKIDGTSCNYVTFDYYDNMEEDDKNVGHVNDMSEQNNNFMNKEKYMSKNVYNSTNKNSNNSSSKGKASNIQQNNLNNNNNINNNINHNNNTYNQINDEKTKRKKKSCCDVEKVEEDDLQKDHAYIIESEYCDDILDNHNHTHESTNHDHSHNDINNISLKTA…	556	6	null	no	GO_0016021	GO_0005887	GO_0016021,GO_0005887	0	0	0	0	0	0	0	0	0	0	0	0	0	0	0	0	0	0	0	0	0	0	0	0	0	0	0	0	0	0	0	0	0	0	0	0	0
180	PF3D7_0204700	hexose transporter	HT	ATGACGAAAAGTTCGAAAGATATATGTAGTGAGAATGAGGGAAAGAAGAATGGAAAGAGCGGATTTTTTAGTACATCGTTTAAATATGTATTATCAGCATGCATAGCATCATTTATATTTGGTTATCAAGTGAGTGTGTTAAATACAATAAAGAATTTTATAGTTGTAGAATTTGAATGGTGTAAAGGAGAAAAGGATCGATTGAATTGTTCCAATAATACAATTCAGAGTTCATTTTTGTTAGCATCAGTATTTATAGGTGCTGTGTTAGGATGTGGTTTTTCTGGTTATTTAGTACAATTTGGAAGAAGGTTATCATTATTAATAATATATAATTTTTTCTTTTTAGTAAGTATTTTAACGTCCATTACTCATCATTTCCATACCATATTATTTGCT…	MTKSSKDICSENEGKKNGKSGFFSTSFKYVLSACIASFIFGYQVSVLNTIKNFIVVEFEWCKGEKDRLNCSNNTIQSSFLLASVFIGAVLGCGFSGYLVQFGRRLSLLIIYNFFFLVSILTSITHHFHTILFARLLSGFGIGLVTVSVPMYISEMTHKDKKGAYGVMHQLFITFGIFVAVMLGLAMGEGPKADSTEPLTSFAKLWWRLMFLFPSVISLIGILALVVFFKEETPYFLFEKGRIEESKNILKKIYETDNVDEPLNAIKEAVEQNESAKKNSLSLLSALKIPSYRYVIILGCLLSGLQQFTGINVLVSNSNELYKEFLDSHLITILSVVMTAVNFLMTFPAIYIVEKLGRKTLLLWGCVGVLVAYLPTAIANEINRNSNFVKILSIVATFVM…	504	12	null	no	GO_0016021, GO_0016020	GO_0005887	GO_0016021,GO_0016020,GO_0005887	0	0	0	0	0	0	0	0	0	0	0	0	0	0	0	0	0	0	0	0	0	0	0	0	0	0	0	0	0	0	0	0	0	0	0	0	0
5285	PF3D7_1471200	inorganic anion exchanger, inorganic anion antiporter	SulP	ATGCTTGAAACAAATAAAGTTGAAGACGCAACTGTTAACGAATATGTAGAAAGACCAGAAGAATTTAATAAACTTGATGAATCTGTAGAAAGAACAAAATTATTTCATAATGATGTGTATGACAATGATATAAAAATATGTTTACCTACAAGAATTGGATTTTCGAAAGCTTTTATGTCTATGGTGGACGGTATAAAATGGGGATGGGGATTTACTAATACACCTAAAGAAACTTCTAAATATTATATAAATGAAATATTATGTGGATGTATATTATGTTTAACTATGTTACCAGAAATGATTTCTTTTTGTATGATAGCAAAAATACCACCATATCTTGGTTTACAAGGAGCTTCTTTTTTATCTTTAATAACATCAATTTTTGGTGGTTCTCCTGCA…	MLETNKVEDATVNEYVERPEEFNKLDESVERTKLFHNDVYDNDIKICLPTRIGFSKAFMSMVDGIKWGWGFTNTPKETSKYYINEILCGCILCLTMLPEMISFCMIAKIPPYLGLQGASFLSLITSIFGGSPAVIHGVTGAFASVCSKYLVENNNVDLLPDGIERLYICIFICSVMLFFFSYFHMSALIQLIPTPVFIGYCNGLSIIFLRAQLHNLKNPYTHEYIKGHYLLFFIIICTLVVLIVELWKKIPKVGQKIPSSLIAITVTIFVEFVILRKFLHNNFASFKDVKSFTVGDMFSFTSDKAKPTFLFTNKDLNFSKVEFNMDLIKQVANMFTVLLVEALMVSEVIKDMGGAECDTNETIFSLFIGNVLASLGSAVGGSSLLGLSVLNYRNGARGK…	664	11	null	no	GO_0016021	GO_0005887, GO_0016020	GO_0016021,GO_0005887,GO_0016020	0	0	0	0	0	0	0	0	0	0	0	0	0	0	0	0	0	0	0	0	0	0	0	0	0	0	0	0	0	0	0	0	0	0	0	0	0
3579	PF3D7_1223100	cAMP-dependent protein kinase regulatory subunit	PKAr	ATGGGCAATGTGTGCACATGGAGACAAGGGAAAGAAAAAGCAGGTGACGATAATTCACAAGTAATAAAAGATAAAGAATTACAAAACGAGTTTAAAACATTCGAACAAAAAATGAGAAGTAATAAAAAAAATGCTCATGAAGGAGATATGAATAATGATGGTGAAGATGATAGATATAAATTTTCCAGAGGTTTTTCATTAAGTAAAAAACCAAGTAAAACTAAAATACCGATTACCAAAACGGATAGTGAAATATTAGATGGATTGGATTATTCTGAAATGAGTAAACAAGTTCTTATGACTTTAAATAAAAAAAATATACTTAATGACGACGGTTCAAGCGACGGTAACGACACAGATGTTCACAGCATGTTCGATAGGAAAGAAATAGAGAGAAAG…	MGNVCTWRQGKEKAGDDNSQVIKDKELQNEFKTFEQKMRSNKKNAHEGDMNNDGEDDRYKFSRGFSLSKKPSKTKIPITKTDSEILDGLDYSEMSKQVLMTLNKKNILNDDGSSDGNDTDVHSMFDRKEIERKVLDLESIHFIQKKRLSVSAEAYGDWNKKIDNFIPKVYKKDEKEKAKIREALNESFLFNHLNKKEFEIIVNAFFDKNVEKGVNIINEGDYGDLLYVIDQGEVEIYKTKENNKKEVLTVLKSKDVFGELALLYNSKRAATATALTKCHLWALDRESFTYIIKDMVAKKRKMYEDILSHVNILKDMDPYERCKVADCLKSKSYNDGEIIIKEGEEGDTFFILIDGNAVASKDNKVIKTYTKGDYFGELALLKNKPRAATIKAQNFCQVV…	441	0	null	no	GO_0005952	GO_0005952	GO_0005952,GO_0005952	0	0	0	0	0	0	0	0	0	0	0	0	0	0	0	0	0	0	0	0	0	0	0	0	0	0	0	0	0	0	0	0	0	0	0	0	0
1591	PF3D7_0714500	transcription elongation factor s-II, putative	null	ATGAGTGAAATCGAAAATAAAAATGTGGAAAAAATTCAAAACATTCAAGAATTATTAAAGGATAAAGAACTATTACTATCAAGTATGGAGGAGGAACAAAATATAGATGAAGATATTATAAAGGAGGTGATAACAAATTTAAATTTATTAAAAGATGTTGAAATAAATAAAGATATTTTAAGAATAACAAAAATTGGTATAACTGTTAATAAGCTTACCAAAATAAATAATGAACTTGTGCAAAATCTATCAAAGGATCTTGTTGAAAAGTGGAAGAATATTGCTAAGATGGAAAAATTGTCTTCTCTCAAAAATTATGAAATGATGAAAAAAAGGAAATCGGAAAAAATAGAAATGGCAAATGATAAGATAAATAATGATAATAATAATGATAATAAT…	MSEIENKNVEKIQNIQELLKDKELLLSSMEEEQNIDEDIIKEVITNLNLLKDVEINKDILRITKIGITVNKLTKINNELVQNLSKDLVEKWKNIAKMEKLSSLKNYEMMKKRKSEKIEMANDKINNDNNNDNNNDNNNDNNNNDNNNNNNNNNNNSDNNFSSNNNNLCEGEVEFKKARLNENGLHKCSSSESSNVPDYNIIKDNFNKIKKNDIKIVNEWNYDGKFHNDMHRDKAKQFLFKAFVVGSSDNLLYFIEKKKLNDIIYNIECELYKVYMEKRSSQKEYNMQLKSIKFNLSDKKNPNFNEKVYSEFISSKALATMNSQDMASDEKKNERKKCLQESLLACQSDWDVKNILLKKSRKGEFQCFKCKGYDTIYHQLQTRSSDEPMTTFVTCLKCNN…	403	0	null	no	GO_0005634	GO_0008023	GO_0005634,GO_0008023	0	0	0	0	0	0	0	0	0	0	0	0	0	0	0	0	0	0	0	0	1	0	0	0	0	0	0	0	0	0	0	0	0	0	0	0	0
1002	PF3D7_0517600	F-actin-capping protein subunit beta, putative	CPbeta	ATGAATAACGACAAAATGGAAGCAGCGCTTAACATTTGTAATACGTTGCCTGGACACGTATTCGATGACACGATAAAAATGTTGTCGCGGATAGATCAAAGCATAACAAACAATATTTTAATAAATAAAGAAGGGAGTATAAAAATAAACTATGATAAGGAAGAGAATAAATATTACTTAGGTAATATGTTTAATAAAGAAAAAGATTCCTACAGATCACCATACACAAATATATATTTTCCTGAACATTATATAAATAGTTATGTGCCTCCAGAACATTTAAGAACATTAGAAATTTTATATAATAAAATTTTCGACCGATATAGAAAAGCCTATTATATGAATGGATTATCGTCAGTATATTTATGGCCTAATCCTATAGAAGACGGATTTGTTGCA…	MNNDKMEAALNICNTLPGHVFDDTIKMLSRIDQSITNNILINKEGSIKINYDKEENKYYLGNMFNKEKDSYRSPYTNIYFPEHYINSYVPPEHLRTLEILYNKIFDRYRKAYYMNGLSSVYLWPNPIEDGFVACFLIKKKEIFDKETNIKWEATHLIQVNITNLNVHYQISCTINFEIKKNDNLLLSGNINKALENSKKVTDLYLIKDQYFHMENMGYLIECMENSLRKSIEYIYILKIQDMLNSIKYYNFTNHLTYNNTNKNISNISNSLIFSRENIQKELQTKIKQVRKK	292	0	null	no	GO_0008290, GO_0071203	GO_0008290	GO_0008290,GO_0071203,GO_0008290	0	0	0	0	0	0	0	0	0	0	0	0	0	0	0	0	0	0	0	0	0	0	0	0	0	0	0	0	0	0	0	0	0	0	0	0	0
718	PF3D7_0413600	26S protease regulatory subunit 6B, putative	RPT3	ATGGAAAGTGTAAGTAAATGTTTAACTGAAGAAGATTATTATATAAGATTGAAAAATTTAAAAAAACAAATTGACATTTTAAATATCCAAGAGGATTATATTAAAGAAGAACATAAAAATTTGAAAAGAGAATTAATAAGGTCAAAAAATGAAATAAAAAGAATACAAAGTGTACCCCTAATTATAGGTCAATTTTTAGATATTATTGATAACAATTATGGGATAGTAAGTAGTACGGCAGGTTCAAATTATTATGTAAGAATACTGTCGACTTTAAATAAGGAGGATTTGAAACCGTCAGTCAGTGTAGCTTTACACAGACATAGTCATTCAATAGTAAATATTTTACCATCTGAATCAGATAGTAGTATACAATTATTACAAATTACTGAAAGACCA…	MESVSKCLTEEDYYIRLKNLKKQIDILNIQEDYIKEEHKNLKRELIRSKNEIKRIQSVPLIIGQFLDIIDNNYGIVSSTAGSNYYVRILSTLNKEDLKPSVSVALHRHSHSIVNILPSESDSSIQLLQITERPNVKYTDLGGLDMQKQEMKEAVELPLTCPELYEKIGIEPPMGILIYGPPGTGKTMLVKAVANETQVTFIGVVGSEFVQKYLGEGPRMVRDVFRLARENSPSIIFIDEVDAIATKRFDAQTGADREVQRILLELLNQMDGFDKSTNVKVIMATNRADTLDPALLRPGRLDRKIEFPLPDRKQKRLIFQTIISKMNVSSDVNIESFVVRTDKISAADIAAIAQEAGMQAIRKNRYIITANDFEQGYRTHVRKQLRDYEFYNI	392	0	null	no	GO_0005737	GO_0008540	GO_0005737,GO_0008540	0	0	0	0	0	0	0	0	0	0	0	0	0	0	0	0	0	0	0	0	0	0	0	0	0	0	0	0	0	0	0	0	1	0	0	0	0
2543	PF3D7_1008400	26S protease regulatory subunit 4, putative	RPT2	ATGGGAAATACTCCAGGTGGTATGAATAATCCTTATGGATTTTTAGGAAAAAAAGAGGATAAGGATAAAGGTAAAGACAAAGATAAGGAAAAGAAAAAGCTGGAAAGTGTTCCAATATCTCATATGGGAAAAAAAAAGAAGAAAAACAAAGGAACATCAGGTCATTCAAAATTACCAAACGTTACACCTAATACAAAATGTCGATTAAAATTATTAAAATTAGAAAGGATAAAAGATTATTTATTATTAGAAGAAGAATATATAACAAATCAAGAGCAGATTAAAAGTAGTGATGATAAGAATTATGTGAAATTGAAAATAGATGATTTAAGAGGATCACCTGTGAGTGTAGGTACCTTAGAAGAATTAATAGATGAAAATCATGGTATTATAGCTACA…	MGNTPGGMNNPYGFLGKKEDKDKGKDKDKEKKKLESVPISHMGKKKKKNKGTSGHSKLPNVTPNTKCRLKLLKLERIKDYLLLEEEYITNQEQIKSSDDKNYVKLKIDDLRGSPVSVGTLEELIDENHGIIATSVGPEYYVNILSFVDKDLLEPGCSVLLNNKTNSVVGILLDEVDPLVSVMKVEKAPLESYADIGGLESQIQEIKEAVELPLTHPELYEDIGIKPPKGVILYGPPGTGKTLLAKAVANETSATFLRVVGSELIQKYLGDGPKLVREMFKVAEEHAPSIVFIDEIDAVGTKRYEATSGGEREIQRTMLELLNQLDGFDSRGDVKVIMATNRIDSLDPALIRPGRIDRKIQLPNPDTKTKRRIFQIHTSKMTMSPDVDLEEFVMSKDELS…	448	0	null	no	GO_0005737	GO_0008540	GO_0005737,GO_0008540	0	0	0	0	0	0	0	0	0	0	0	0	0	0	0	0	0	0	0	0	0	0	0	0	0	0	0	0	0	0	0	0	1	0	0	0	0
3163	PF3D7_1130400	26S protease regulatory subunit 6A, putative	RPT5	ATGAATGTTGAGAATATTTTTGGAAATGAAGAAGTGAATGTAGAAGAAATTGAAAAATTGTCAAATAGCGAAATAAAAACGCGTGTTAGTTTAATTGATACTGAAATAAAAATATTGAAGAATGAACATGCAAGATTAAAAAATGAATATAAGAATTTACAAGAAAAGATAAAAGATAATGTGGAGAAAATTCATTTAAACAAAATGCTACCTTATTTAGTAGCTAATGTAGTGGAATCATTAGACTTAGAAGATGAAGAAGAAGAAAACGAAATAAAAGATGAATATGATTTATATGATAATAATTTAAAATTAAGTCATGAAGGATTTCGTGATATAGATGATGAGAAAAGAGGGAAATGTATGGTTATTAAAACGTCAACTAGACAAACAATATTC…	MNVENIFGNEEVNVEEIEKLSNSEIKTRVSLIDTEIKILKNEHARLKNEYKNLQEKIKDNVEKIHLNKMLPYLVANVVESLDLEDEEEENEIKDEYDLYDNNLKLSHEGFRDIDDEKRGKCMVIKTSTRQTIFLPVPGLIDASELKPGDLVGVNKDSYLIIDKLPQEYDNRVKAMEVIEKPSEDYSDIGGLDKQIEDLVEAIVLPMLHKEKFEKIGIKPPKGVLMHGPPGTGKTLLARACASQTNATFLKLAGPQLVQMFIGDGAKMVRDAFNLAKEKAPAIIFIDELDAIGTKRFDSELSGDREVQRTMLELLNQLDGFSTDDTVKVIAATNRPDTLDPALLRSGRLDRKIELPHPNEESRARILQIHSRKMNVHKDVNFEELARSTDDFNGAQLKAV…	439	0	null	no	GO_0005737	GO_0008540	GO_0005737,GO_0008540	0	0	0	0	0	0	0	0	0	0	0	0	0	0	0	0	0	0	0	0	0	0	0	0	0	0	0	0	0	0	0	0	1	0	0	0	0
3829	PF3D7_1248900	26S protease regulatory subunit 8, putative	RPT6	ATGGCAGCTGTTGATTTCGATGTAAGGTCAAAAAATCTGTCAGAAGGTATAAAGAACGAAATATCAGAAAAGAATATGGAAAATAATAATAATAATGATAATAATAAAAATAGCAGTGCATTAAATGAAGAACAAGTACAATCTGGAATAAAAAGATATTATGAATTAAAAATAGAAGAATATGAATCGATTATAAATAAGAAATTACAAAATAAAAAAAGATTAGAAGCACAAAGAAATGAATTAAATGCTAGAGTTCGTGAATTATGTGATGAAATACAATATTTATTAGAAGCTGCTTCTTATGTAGGTGAAATTGTAAAACCAATGGGAAAAAATAAAGTATTAGTAAAAATAAATCCTGAAGGAAAATATGTTGTAGATATTGCTAGACATATA…	MAAVDFDVRSKNLSEGIKNEISEKNMENNNNNDNNKNSSALNEEQVQSGIKRYYELKIEEYESIINKKLQNKKRLEAQRNELNARVRELCDEIQYLLEAASYVGEIVKPMGKNKVLVKINPEGKYVVDIARHINISHCTPNTRVALYNDSYKLHKILPSKVDPLVSLMKVEKVPDSTYEMVGGLDQQVKEVKEVIELPVKHPEIFESLGISQPKGVLLYGPPGTGKTLLARAVAHHTDCTFIRVSGSELVQKYIGEGSRMVRELFVMAREHAPSIIFMDEIDSIGSQRIEGEHGDSEVQRTMMELLNQLDGFESTQNIKVIMCTNRIDILDEALLRPGRIDRKIEFPNPNVEARMEILKIHSRKMNLMRGIDMLKIATDMNNCSGAEVKAVCTEAGMFA…	435	0	null	no	GO_0005737	GO_0008540	GO_0005737,GO_0008540	0	0	0	0	0	0	0	0	0	0	0	0	0	0	0	0	0	0	0	0	0	0	0	0	0	0	0	0	0	0	0	0	1	0	0	0	0
3947	PF3D7_1306400	26S protease regulatory subunit 10B, putative	RPT4	ATGGATAACAAGGAAAGCATAAAATTGTATGTGAAGAAAGTTATTGAACACAGAGAAATTGAGAGTAAAGTAAAGAAGTTAAGATTAGATATAAAAGAGTTAAATAAAAAATATGAGAAAACTGAAGATAATTTAAAGGCCTTACAAAGTGTAGGTCAAATAATAGGACAAGTATTAAAACAGCTAGAAGATGAGAAATTTATTGTGAAAGCTTCTAGTGGTCCTAGATATGTAGTAGGATGTAAATCTAAAATTAATAAAAGTAAATTAGTAATAGGTACAAGAGTATCATTAGATATGACAACATTAACGGTTATGAAAAGATTACCATGTGAAGTGGATCCTTTAGTTTTTAATATGATAAGTGATATAGATAAAAGTGAAAATAGTACAAACAAA…	MDNKESIKLYVKKVIEHREIESKVKKLRLDIKELNKKYEKTEDNLKALQSVGQIIGQVLKQLEDEKFIVKASSGPRYVVGCKSKINKSKLVIGTRVSLDMTTLTVMKRLPCEVDPLVFNMISDIDKSENSTNKVNYNQIGGLSEQIRQMREVVELPILNPYLYKRVGIKTPKGVLLYGPPGTGKTLLARAMASNINCNFMRIVVSAIVDKYIGESARIIREMFNYAKEHQPCIIFMDEIDAIGGRRFSQGTSADREIQRTLMELLNHLDGFEELGNVKIIMATNRPDVLDPALVRPGRLDRKIEIPLPNETARIEILKIHANKMTKLGDIDYESVCRLCDGFNGADLRNVCTEAGMFAIRAMRDYVIEEDFYKAARKISEGKKLEGKIEYEKI	393	0	null	no	GO_0005737	GO_0008540	GO_0005737,GO_0008540	0	0	0	0	0	0	0	0	0	0	0	0	0	0	0	0	0	0	0	0	0	0	0	0	0	0	0	0	0	0	0	0	1	0	0	0	0
4729	PF3D7_1414000	26S proteasome regulatory subunit RPN13, putative	RPN13	ATGGATTCAGCAAAGATACATTTACAAATTAATGCTGGGAAATGTATTTATGATGGGAAAATGGTCAAACCAGATAAACGAAAGGGGAAATTGGTCCTTTACAAAATTTATGATAATCTTTACAACTTTCAATGGATTAATAGAGAAAATAACGAAATTGAGGATAATTTGATATTAACCAAAAGCATTTCCTTAGAACGAGTTGAACAATGTAAAACGGGAAGGGTCTATTTATTAAGAAATAAAACCAGAGGCGAAATTTCGTTTTATTGGATGCAGGATTATGATGATTCGAAGGACGAAATTTTCGTTAAGCAATTTAACTCCATTATAACAAATGAACTAGCAAACATCGACGCTGGAAGTAAACCATCTAATACAAATGATTATCTCTCTGAG…	MDSAKIHLQINAGKCIYDGKMVKPDKRKGKLVLYKIYDNLYNFQWINRENNEIEDNLILTKSISLERVEQCKTGRVYLLRNKTRGEISFYWMQDYDDSKDEIFVKQFNSIITNELANIDAGSKPSNTNDYLSELSGLIISQTRNMNKDNTKKDIYFKDIFKGEYFSKLLEIPEALEELKIHMPEGYKTKEDIIDVINSRALNPNLKALDMSLPTHLNFVLISLNLPPHEGEVNDPMEYIVDALEKKYTKEENN	253	0	null	no	GO_0005737, GO_0005634	GO_0008541	GO_0005737,GO_0005634,GO_0008541	0	0	0	0	0	0	0	0	0	0	0	0	0	0	0	0	0	0	0	0	1	0	0	0	0	0	0	0	0	0	0	0	1	0	0	0	0
1446	PF3D7_0630300	DNA polymerase epsilon catalytic subunit A, putative	null	ATGTCTACACAAACAAGGACAAAAGGATGGGAGAAGGAATCAAAAATTAATCCAGATTATGAATATGAGAGATTGTTAAAATTAGAAAATAAGTTTCATATAAAAGCATGGATTAATAAAGGAGAGAAAGAAGGATATCTTTATAATATAGTTCCTACTACTATGAATGTAGTAGCAAAAAATTCAAATAAATCACATAAAAAAACAGGTGTACACATGTATTTTGTGTCAGACAATAACAAGACGTGGAGATTAACTCTTTTTTATAGACCCTACTTTTATTTAAAAACCAAGAATATACATAATTATGAACAAGTAACAAAATTTTTAAAAAAGGAACTAGATAAGTATAACGTTGAAATTGATTATGTAAAAAAAGAGGATTTAAGTTTATACGAT…	MSTQTRTKGWEKESKINPDYEYERLLKLENKFHIKAWINKGEKEGYLYNIVPTTMNVVAKNSNKSHKKTGVHMYFVSDNNKTWRLTLFYRPYFYLKTKNIHNYEQVTKFLKKELDKYNVEIDYVKKEDLSLYDHLNKKRSYLSNIFFKLSYDTIENLMNARDFLVKIIERNKKQNKNYNNSNNDKHIFNNEDLSYSQLEFSYKNEYSYNKYDDQKENTQKQQFTTNITEEDDKKRILNAKSNDNNNNNNNNTHNSNNNNNILNMNDIIVTTKKQILSKEEIMNEIIEIYEYDVKYLTRICIDKNIRCGLWYKVKREEDELYTELIQFEILNKKVLAPLNILAWDIECYKDELKFPDKEKDEIILISYMYNAQGYLIVNRNVMSKNIREFLYKPNEEYSG…	2907	0	null	no	GO_0005634	GO_0008622	GO_0005634,GO_0008622	0	0	0	0	0	0	0	0	0	0	0	0	0	0	0	0	0	0	0	0	1	0	0	0	0	0	0	0	0	0	0	0	0	0	0	0	0
3516	PF3D7_1216200	glycerol-3-phosphate dehydrogenase [NAD(+)], putative	null	ATGTATAGAAACCTTTTTGACAAGTTGAAGGATGGTCCTCTGAAGATAAGTATTCTAGGAAGTGGTAACTGGGCTAGTGCCATTAGTAAAGTTGTTGGCACGAATGCCAAGAATAATTATTTATTCGAAAATGAAGTTAGGATGTGGATAAGAGATGAATTTGTAAATGGAGAAAGGATGGTCGATATAATTAATAATAAACATGAGAATACAAAATACTTAAAAGGTGTACCTTTACCTCATAATATTGTAGCTCATTCTGATTTAGCTAGTGTTATTAATGATGCTGATTTATTAATTTTTATCGTCCCATGTCAATATTTAGAAAGTGTGTTAGCCTCAATCAAAGAAAGTGAATCTATAAAAATAGCTAGCCACGCTAAAGCTATTTCTTTAACT…	MYRNLFDKLKDGPLKISILGSGNWASAISKVVGTNAKNNYLFENEVRMWIRDEFVNGERMVDIINNKHENTKYLKGVPLPHNIVAHSDLASVINDADLLIFIVPCQYLESVLASIKESESIKIASHAKAISLTKGFIVKKNQMKLCSNYISDFLNIPCSALSGANIAMDVAMENFSEATIGGNDKDSLVIWQRVFDLPYFKINCVNETIEVEICGALKNIITLACGFCDGLNLPTNSKSAIIRNGINEMILFGKVFFQKFNENILLESCGFADIITSFLAGRNAKCSAEFIKSTPKKTWEELENEILKGQKLQGTVTLKYVYHMIKEKNMTNEFPLFTVLHKISFENEDPSSLLKTFMNNKINQLNL	367	0	null	no	GO_0005737, GO_0009331	GO_0009331	GO_0005737,GO_0009331,GO_0009331	0	0	0	0	0	0	0	0	0	0	0	0	0	0	0	0	0	0	0	0	0	0	0	0	0	0	0	0	0	0	0	0	1	0	0	0	0
4158	PF3D7_1327300	conserved Plasmodium protein, unknown function	null	ATGGGTATTAAAGATAATATAAATGCGGATCTATCAGACGATTCGAAAAAAGAAAGACAAGGACTTGAATTAACAGAAGAAAAAGTTCTTGAAGAAAATATAAATAAAATTGATATACAAGAAAAAAAAGAGAATAAAGAAATAAATAAAGGAGATATAAATAATGATAATGAAGAAATTGAGAATTCATATATTAAGGAAAATTTAGATCCATTAAATGAAAATAAAGATAATTCCAGTGCTAATTTGAACGGATTAATAACTAAAGAACATATCGTTTCATCGATTTCACCAACTGATGAGTTGAAAATTTCGCAATTGGATTCAGATAACAAAAATTTAGAGAATACCCTAATTAGAGATGACAAAGAAAATAATTTGAATAATGAAAATACTCAT…	MGIKDNINADLSDDSKKERQGLELTEEKVLEENINKIDIQEKKENKEINKGDINNDNEEIENSYIKENLDPLNENKDNSSANLNGLITKEHIVSSISPTDELKISQLDSDNKNLENTLIRDDKENNLNNENTHVIIDKEKNDVDVPFIESKTWGSFSLNVNSKFPISQKKNKNAAINDAPLYIEVKGLLEVINAQDFAKKVNRKNTNLNVKAQNSLIKKRSYSVPNKAVAKNIPKDNYNMNLKKQNYKSVSLQKNSGLNKLAITQKKPSIFIKPLSNSPKTLSKIPYSKYDVIRKPLDLNKGGKGTFRYLEKKIPSIEDSQKINTKEIIRPNIASFKESPIGEKGKNIAAKMEKHSLKFSPKVMPLLMKEKNVKHKAPSKGTIKHTLEYLKRAAESRMK…	1795	0	null	no	GO_0005737, GO_0016459	GO_0009986	GO_0005737,GO_0016459,GO_0009986	0	0	0	0	0	0	0	0	0	0	0	0	0	0	0	0	0	0	0	0	0	0	0	0	0	0	0	0	0	0	0	0	1	0	0	0	0
2481	PF3D7_1002200	tryptophan-rich antigen 3	PArt	ATGCAAATTAATCCAATGGAAAAATCATCCTTTGTGCAAACCAGAATTTTCCCACCAAAACCTACAATTTTTAGTCTAGAAAAAAATGATGATTTCTTAAATACACATAATGAAGGCTTTTTAATTTTATCCTATTGTTTTGCCATATCCCTCTTTATGTATATTGTGCTTAAAAATCTGTATTATTTGTACATTTTTAAGAGGACACGAATAAAAATCATCGAATCATTAAATAATGATAACAATGTAGAAAATGAGATAGAAGAAATGAAAAGGGTAAAAAATTTAATTATGGAACAAGTAATACATGAATTAATGAGAAAAAGTATTATTTCAAAAAGAAGGACAAGAAAAGATATAGAAACTGATTTATCACAAAATGTGAGAAATGAAGATATG…	MQINPMEKSSFVQTRIFPPKPTIFSLEKNDDFLNTHNEGFLILSYCFAISLFMYIVLKNLYYLYIFKRTRIKIIESLNNDNNVENEIEEMKRVKNLIMEQVIHELMRKSIISKRRTRKDIETDLSQNVRNEDMNLKENEIEMTQVETLKHLIHNNLLTEFHDTKEKNLESFIKFLQQLMTLEKNEKEFSNNILVKDLMDYIINIGKKEIQKSNTQLSQNSSQNYIPSNENDIYIFQIQVIKELLKNNIIITHSNDGKQLDDEIITKILEESLMSQANVVEYFYIEMIKNILGNDYNELNNISYTHDDLYLQKYEKELIKKKLSQYAYKNMNTKQNNKYVQDKTVNKHIHKNQIEQNENTTNLIEKENTFEKTNKFDNNGMIQNNIPIQNETNDESMKNI…	979	1	null	no	GO_0016020	GO_0009986	GO_0016020,GO_0009986	0	0	0	0	0	0	0	0	0	0	0	0	0	0	0	0	0	0	0	0	0	0	0	0	0	0	0	0	0	0	0	0	0	0	0	0	0
2823	PF3D7_1035700	duffy binding-like merozoite surface protein	DBLMSP	ATGAAGAAAATATATAGTATTTTCTTTTCTTTATTTATTTTGAATCTTCATATATATATAAAAAATATCAAATGCAATGACCTAATAAATTATAATGATTCGAATCTAAGAAACGGATTACTAAATAATAGTTTAGATTTAACAAATGGATTAAATAACAAAGATAACAGTTTTATTGATTCTAAAATTGAAGAACATGAAAATAAATCTTACCAAAATAAAGATAATAATATCTCTATCGTTGGACAAGATGTGCCTATTACATCGGTATATTCTTCTAAAATTATAAATGCTAATGATTTAGAAGGAAATAGTATTGACGATACTAAAGGTCTTAGTGTTACTAATAGTGGATTTGATGATGGTAGTGCTTTTGGTGGTGGACTCCCTTTTTCTGGT…	MKKIYSIFFSLFILNLHIYIKNIKCNDLINYNDSNLRNGLLNNSLDLTNGLNNKDNSFIDSKIEEHENKSYQNKDNNISIVGQDVPITSVYSSKIINANDLEGNSIDDTKGLSVTNSGFDDGSAFGGGLPFSGYSPLQGNHNKCPDENFCKGIKNVLSCPPKNSTGRNGDWISVAVKESSTTNKGVLVPPRRTKLCLRNINKVWHRIKDEKNFKEEFVKVALGESNALMKHYKEKNLNALTAIKYGFSDMGDIIKGTDLIDYQITKNINRALDKILRNETSNDKIKKRVDWWEANKSAFWDAFMCGYKVHIGNKPCPEHDNMDRIPQYLRWFREWGTYVCSEYKNKFEDVIKLCNIQQFTNQDDSQLLEISKKDKCKEALKHYEEWVNRRRPEWKGQCD…	697	0	HMM: MKKIYSIFFSLFILNLH, NN: MKKIYSIFFSLFILNLHIYIKNIKCN	yes	GO_0016021	GO_0009986	GO_0016021,GO_0009986	0	0	0	0	0	0	0	0	0	0	0	0	0	0	0	0	0	0	0	0	0	0	0	0	0	0	0	0	0	0	0	0	0	0	0	0	0
2827	PF3D7_1036300	duffy binding-like merozoite surface protein 2	DBLMSP2	ATGATATATATTTTATCTATTGTATTTTATATATTTTTTTTACATATTGATATATATGTAAACATTTATTCTACATGTTTTGTTGTAAATGAGGGGAACCCTAATTTAAGAAATAACATAATTAATGATGATGAACTAAAGGGGAAAGCATATAATAATACTATAGATGCTAATAACCAAAATATAGAATATAATAAAAACTTAAAGCACAATGTAAACTCATCTCATATATCTAAATTTTCGGATATTATGGATCAAGAAGATAAAGGAGATAATGAAAATTCTCATGACATAAAATTTGAAGAAAAAAAAAATATTAATAAATCTTTAGACGCTGAATCCAATTATGGTATTAATGAAATTAGTATTACTGGTAATGATAGTAATAGTGATAATAGT…	MIYILSIVFYIFFLHIDIYVNIYSTCFVVNEGNPNLRNNIINDDELKGKAYNNTIDANNQNIEYNKNLKHNVNSSHISKFSDIMDQEDKGDNENSHDIKFEEKKNINKSLDAESNYGINEISITGNDSNSDNSNQNIFPDGSELAGGIPRSIYTINLGFNKCPTEEICKDFSNLPQCRKNVHERNNWLGSSVKNFSSDNKGVLVPPRRQSLCLRITLQDFRTKKKKEGDFEKFIYSYASSEARKLRTIHNNNLEKAHQAIRYSFADIGNIIRGDDMMDTPTSKETITYLEKVLKIYNENNDKPKDAKKWWTENRHHVWEAMMCGYQSAQKDNQCTGYGNIDDIPQFLRWFREWGTYVCEESEKNMNTLKAVCFPKQPRTEANPALTVHENEMCSSTLKK…	762	1	HMM: MIYILSIVFYIFFLHIDIYVNIYST, NN: MIYILSIVFYIFFLHIDIYVNIY	yes	GO_0016021	GO_0009986	GO_0016021,GO_0009986	0	0	0	0	0	0	0	0	0	0	0	0	0	0	0	0	0	0	0	0	0	0	0	0	0	0	0	0	0	0	0	0	0	0	0	0	0
2114	PF3D7_0903700	alpha tubulin 1	null	ATGAGAGAAGTAATAAGTATCCATGTAGGACAAGCTGGTATCCAAGTTGGAAATGCTTGCTGGGAATTGTTTTGCCTAGAGCATGGAATACAGCCCGATGGTCAAATGCCCTCTGACAAGGCTTCTAGAGCTAATGATGATGCTTTTAATACATTCTTTTCAGAAACGGGGGCAGGAAAACATGTACCACGTTGTGTTTTTGTCGATTTAGAGCCAACCGTTGTTGATGAAGTCAGAACAGGAACTTATCGTCAATTATTTCATCCTGAACAATTAATATCAGGAAAAGAAGATGCTGCCAACAATTTTGCTAGAGGACACTATACAATCGGTAAAGAAGTTATAGATGTATGTTTGGACAGAATTAGAAAATTAGCTGATAACTGTACCGGTTTACAA…	MREVISIHVGQAGIQVGNACWELFCLEHGIQPDGQMPSDKASRANDDAFNTFFSETGAGKHVPRCVFVDLEPTVVDEVRTGTYRQLFHPEQLISGKEDAANNFARGHYTIGKEVIDVCLDRIRKLADNCTGLQGFLMFSAVGGGTGSGFGCLMLERLSVDYGKKSKLNFCCWPSPQVSTAVVEPYNSVLSTHSLLEHTDVAIMLDNEAIYDICRRNLDIERPTYTNLNRLIAQVISSLTASLRFDGALNVDVTEFQTNLVPYPRIHFMLSSYAPVVSAEKAYHEQLSVSEITNSAFEPANMMAKCDPRHGKYMACCLMYRGDVVPKDVNAAVATIKTKRTIQFVDWCPTGFKCGINYQPPTVVPGGDLAKVMRAVCMISNSTAIAEVFSRMDQKFDLMY…	453	0	null	no	GO_0005874, GO_0043234	GO_0009986, GO_0005634	GO_0005874,GO_0043234,GO_0009986,GO_0005634	0	0	0	0	0	0	0	0	0	0	0	0	0	0	0	0	0	0	0	0	1	0	0	0	0	0	0	0	0	0	0	0	0	0	0	0	0
2622	PF3D7_1015900	enolase	ENO	ATGGCTCATGTAATAACTCGTATTAATGCCCGTGAAATTTTAGATTCTAGAGGAAACCCAACTGTAGAAGTTGACTTAGAGACCAACTTAGGTATTTTCAGAGCTGCCGTACCATCTGGTGCCTCCACTGGTATTTATGAAGCCTTAGAATTAAGAGATAATGACAAGAGCAGGTACTTAGGAAAGGGTGTTCAAAAAGCTATCAAGAACATTAATGAAATTATTGCTCCAAAATTGATTGGAATGAATTGTACTGAACAAAAGAAAATTGACAATTTAATGGTTGAAGAATTAGATGGAAGTAAAAATGAATGGGGATGGTCAAAAAGTAAATTAGGAGCTAATGCTATTTTAGCTATATCCATGGCTGTATGTAGAGCTGGTGCAGCTGCTAATAAA…	MAHVITRINAREILDSRGNPTVEVDLETNLGIFRAAVPSGASTGIYEALELRDNDKSRYLGKGVQKAIKNINEIIAPKLIGMNCTEQKKIDNLMVEELDGSKNEWGWSKSKLGANAILAISMAVCRAGAAANKVSLYKYLAQLAGKKSDQMVLPVPCLNVINGGSHAGNKLSFQEFMIVPVGAPSFKEALRYGAEVYHTLKSEIKKKYGIDATNVGDEGGFAPNILNANEALDLLVTAIKSAGYEGKVKIAMDVAASEFYNSENKTYDLDFKTPNNDKSLVKTGAQLVDLYIDLVKKYPIVSIEDPFDQDDWENYAKLTAAIGKDVQIVGDDLLVTNPTRITKALEKNACNALLLKVNQIGSITEAIEACLLSQKNNWGVMVSHRSGETEDVFIADLVV…	446	0	null	no	GO_0000015	GO_0009986, GO_0005737, GO_0005856, GO_0020020, GO_0005634, GO_0005886	GO_0000015,GO_0009986,GO_0005737,GO_0005856,GO_0020020,GO_0005634,GO_0005886	1	0	0	0	0	0	0	0	0	0	0	0	0	0	0	0	0	0	0	0	1	0	0	0	0	0	0	0	0	0	0	0	1	0	0	0	0
2275	PF3D7_0919500	major facilitator superfamily domain-containing protein, putative	MFS3	ATGTTGTATATAACCAAGATCATAAGCAATGCTTGCCTGGCTATGTTAAATTGCGGAATGTGCATAACGGCAACAAATATGGCAAGAAAATTTATAGTGCAAGAATATGAAATATGTCCAATGGATCATAGAGGTTGTGATAAAGAAAAGTGGTATTTCGCTTGCTTTTCATTTGTTTTATATATGAGTGCTTTATTTGGATGTTTTTTATGTTTATTTTTTAAAAGTTTGAACAGGAGAAAGTTTATGTTACTTATAAATTATTTATTTATGTTTGGTAGTTTATTAACAATATATAATAAGCCTCATATAATAATATTTTTATTTACTCAAGCTTTTTTTGGGTTAGCTATCGGATGCTCCTTTGTTATTGTATGTTTTTATGTTTTAGAGTATTCT…	MLYITKIISNACLAMLNCGMCITATNMARKFIVQEYEICPMDHRGCDKEKWYFACFSFVLYMSALFGCFLCLFFKSLNRRKFMLLINYLFMFGSLLTIYNKPHIIIFLFTQAFFGLAIGCSFVIVCFYVLEYSTKTYQNFYGFYLQTFFALGMFISYLFGGAYENIKFDNLRRTHICLYTLYKIHFLLPTLFSLISVLLFHFVYKMDTPLHLYEKKSYKKYETLKSKINMEQLDEVTEYHRNKTNKEVRFLMSDMLFIDFWNNKKLFNTSLITSLICYLYSFSGCFIFFTKPFLFYKSFSTNMANTFICVGFILWYIICTIISTIISQYYKKRDLLIIGLVLQVIASTAMVASYFVTLTNITNKIIITISIFLYFLGLSFGFGHIIWTHVFETFPNECR…	476	11	null	no	GO_0016021	GO_0009986, GO_0005886	GO_0016021,GO_0009986,GO_0005886	0	0	0	0	0	0	0	0	0	0	0	0	0	0	0	0	0	0	0	0	0	0	0	0	0	0	0	0	0	0	0	0	0	0	0	0	0
518	PF3D7_0316600	formate-nitrite transporter	FNT	ATGCCACCAAATAATTCCAAATATGTTTTAGATCCAGTAAGCATAAAATCTGTTTGTGGAGGGGAAGAATCATATATTAGATGTGTTGAATATGGGAAAAAAAAAGCGCATTATAGTAATTTAAATTTATTAGCAAAAGCTATATTAGCTGGTATGTTTGTTGGACTTTGTGCACACGCTTCCGGAATAGCAGGAGGGTTGTTTTATTATCACAAATTAAGAGAAATCGTAGGAGCATCGATGAGTGTGTTTGTATATGGTTTTACCTTTCCTATAGCTTTTATGTGTATTATATGTACAGGTTCTGATTTGTTTACGGGTAATACTTTAGCAGTAACCATGGCATTATATGAGAAGAAAGTAAAACTATTGGATTATTTGCGAGTTATGACTATATCA…	MPPNNSKYVLDPVSIKSVCGGEESYIRCVEYGKKKAHYSNLNLLAKAILAGMFVGLCAHASGIAGGLFYYHKLREIVGASMSVFVYGFTFPIAFMCIICTGSDLFTGNTLAVTMALYEKKVKLLDYLRVMTISLFGNYVGAVSFAFFVSYLSGAFTNVHAVEKNHFFQFLNDIAEKKVHHTFVECVSLAVGCNIFVCLAVYFVLTLKDGAGYVFSVFFAVYAFAIAGYEHIIANIYTLNIALMVNTKITVYQAYIKNLLPTLLGNYIAGAIVLGLPLYFIYKEHYYNFERSKRDNNDAQMKSLSIELRN	309	6	null	no	GO_0016020	GO_0009986, GO_0005887	GO_0016020,GO_0009986,GO_0005887	0	0	0	0	0	0	0	0	0	0	0	0	0	0	0	0	0	0	0	0	0	0	0	0	0	0	0	0	0	0	0	0	0	0	0	0	0
454	PF3D7_0310400	parasite-infected erythrocyte surface protein	PIESP1	ATGAAGGTTGGAATTATATTTTTTTGTTTATTTTTTTTTGTGGTTCTTGGAGCGTGTAACAATGTGAAGGAAAGGATTTTTAAGAATATTAAAAAAAGAACCAAATTTATTATATTGAATGAGCCCATAGTAGATTTAAGTTTTAGTGAGAATTTATTTCATACTTTATTATTTGATTTAGATGTAGATAAGAATTTATATACATTGGATGAGAGTTTATTAAATCTTGAGAACTTGAATTATTCCTCAATATTTCGTTTACTTGTTGATACCTATAAGAATATAAAAGAAAATGAAGATGATAATAAAAATATTCGATATATATTTTTAGGTACATCGTTTTCACGTATTCATCCCTTAAATTTTGAATATTTTTTGAGAAAGCTGAACAAATATATA…	MKVGIIFFCLFFFVVLGACNNVKERIFKNIKKRTKFIILNEPIVDLSFSENLFHTLLFDLDVDKNLYTLDESLLNLENLNYSSIFRLLVDTYKNIKENEDDNKNIRYIFLGTSFSRIHPLNFEYFLRKLNKYIYNGNIYEKGNVDIRGILEEYNKEIEEKKLEKQKLNKIKDKNNNNNNNNNSKFSKDGDNEDFNNKNDLYNPSDKLYNNNDDIDVHELLEEIITKEKRFFLNDDDDNDSNDKYILKTDEVNKYKGFFIGYGFNDDIPSVIHHYNFDKNFLFPSLNSGIILDITLLKNIYEVSNILLSNNEKDQSIHIDYIYEVTKYIKENLRVRLTHSENVCLNEEQNIHLLDNDPNNFEIYKYYQVLNLFKDYNKNTEEKQYEKIGHENVRHEETSS…	1294	0	HMM: MKVGIIFFCLFFFVVLGA, NN: MKVGIIFFCLFFFVVLGACN	yes	GO_0016020	GO_0009986, GO_0020002, GO_0085026	GO_0016020,GO_0009986,GO_0020002,GO_0085026	0	0	0	0	0	0	0	0	0	0	0	0	0	0	0	0	0	0	0	0	0	0	0	0	0	0	0	0	0	0	0	0	0	0	0	0	0
446	PF3D7_0309600	60S acidic ribosomal protein P2	PfP2	ATGGCTATGAAATACGTTGCTGCATATCTTATGTGTGTATTGGGAGGAAATGAAAACCCAAGCACAAAAGAAGTTAAGAATGTGTTAGGAGCCGTAAATGCTGATGTAGAAGATGAAGTTTTAAACAATTTTATTGATTCATTAAAAGGAAAGAGTTGCCATGAATTAATTACTGATGGATTAAAAAAATTACAAAATATTGGAGGTGGTGTAGCTGCCGCACCAGCTGGTGCCGCTGCAGTAGAAACTGCTGAAGCTAAGAAAGAAGATAAGAAAGAAGAAAAGAAAGAAGAAGAAGAGGAAGAAGAAGACGACTTAGGATTTTCCTTATTTGGTTAA	MAMKYVAAYLMCVLGGNENPSTKEVKNVLGAVNADVEDEVLNNFIDSLKGKSCHELITDGLKKLQNIGGGVAAAPAGAAAVETAEAKKEDKKEEKKEEEEEEEDDLGFSLFG	112	0	null	no	GO_0005622, GO_0005840	GO_0009986, GO_0022625, GO_0044228, GO_0015934	GO_0005622,GO_0005840,GO_0009986,GO_0022625,GO_0044228,GO_0015934	0	0	0	0	0	0	0	0	0	0	0	0	0	0	0	0	0	0	0	1	0	0	0	0	0	0	0	0	0	0	0	0	0	0	0	0	0
4485	PF3D7_1361400	actin-depolymerizing factor 2	ADF2	ATGGTATCTGGGGTCAAGGTTTCAGATGAATGTGTTTATGAATTTAACAAACTAAAGATTAAGCATATACACAAATATATAATATATCGTATAGAAAATTATGAAGAAGTTATTGTGGATTTTTTAGAACAAGATAATTCATTGAAATCTTATAAAGATATTATAATTGATATAAGGAATAATTTAAAAACAACAGAATGTAGATATATAATTGCAGATATGCCTATTCCTACACCTGAAGGTGTTTTAAGAAATAGAATATATTTTATTTTTTGGTCACCTGACTTAGCAAAATCAAAAGAAAAGATGTTATACGCATCGTCTAAAGAATATCTTGTTCGTAAAATTAATGGTATTTTTAAAAGCTTAGAAATTACATGTGATCTAGAGGATTTTGAA…	MVSGVKVSDECVYEFNKLKIKHIHKYIIYRIENYEEVIVDFLEQDNSLKSYKDIIIDIRNNLKTTECRYIIADMPIPTPEGVLRNRIYFIFWSPDLAKSKEKMLYASSKEYLVRKINGIFKSLEITCDLEDFEDELRTIILNT	143	0	null	no	GO_0005622	GO_0015629	GO_0005622,GO_0015629	0	0	0	0	0	0	0	0	0	0	0	0	0	0	0	0	0	0	0	1	0	0	0	0	0	0	0	0	0	0	0	0	0	0	0	0	0
865	PF3D7_0503400	actin-depolymerizing factor 1	ADF1	ATGATAAGTGGTATTCGAGTTAATGATAATTGTGTAACGGAATTTAATAACATGAAGATTAGGAAGACATGTGGCTGGATTATTTTTGTCATACAAAATTGTGAAATAATTATTCATTCAAAAGGTGCTTCAACAACCTTAACAGAATTAGTACAGTCCATAGATAAAAATAATGAAATTCAATGTGCATATGTTGTGTTCGATGCAGTAAGCAAAATTCACTTCTTCATGTATGCAAGAGAATCATCCAACTCAAGAGACAGAATGACCTATGCCTCTAGCAAACAAGCCATATTAAAAAAAATCGAAGGAGTTAATGTGCTCACATCTGTTATTGAAAGTGCACAAGATGTTGCTGATCTTAAATAA	MISGIRVNDNCVTEFNNMKIRKTCGWIIFVIQNCEIIIHSKGASTTLTELVQSIDKNNEIQCAYVVFDAVSKIHFFMYARESSNSRDRMTYASSKQAILKKIEGVNVLTSVIESAQDVADLK	122	0	null	no	GO_0005622	GO_0015629, GO_0005829	GO_0005622,GO_0015629,GO_0005829	0	0	0	0	0	0	0	0	0	0	0	0	0	0	0	0	0	0	0	1	0	0	0	0	0	0	0	0	0	0	0	0	0	0	0	0	0
1325	PF3D7_0618300	60S ribosomal protein L27a, putative	null	ATGGCAACAAGATTTAAGAAGAACAGGAAAAAGAGAGGTCATGTTTCAGCTGGTCATGGTCGTGTGGGTAAACACAGAAAACATCCCGGTGGAAGAGGAAAAGCTGGAGGTTTACATCACATGAGAATTAATTTTGATAAATATCATCCAGGTTATTTTGGAAAGGTTGGTATGAGACATTTAAATTTATTAAAAAATAGAACTTACTGCCCAACCATCAATGTAGATAAATTATGGGGACTTTTACCAGAAGAAAAGAAAAAAGAATTTTCTGAAAATAAAGATATTGCCCCTGTTATTGATGTAACAAGAAAAGGATATTTTAAAGTTTTAGGAAATGGTAAATTAAAACATAATCAACCAATTGTTGTAAAAGCAAGATACTTTTCATCCGTTGCT…	MATRFKKNRKKRGHVSAGHGRVGKHRKHPGGRGKAGGLHHMRINFDKYHPGYFGKVGMRHLNLLKNRTYCPTINVDKLWGLLPEEKKKEFSENKDIAPVIDVTRKGYFKVLGNGKLKHNQPIVVKARYFSSVAEKKIKAVGGQCILVA	148	0	null	no	GO_0005622, GO_0005840	GO_0015934	GO_0005622,GO_0005840,GO_0015934	0	0	0	0	0	0	0	0	0	0	0	0	0	0	0	0	0	0	0	1	0	0	0	0	0	0	0	0	0	0	0	0	0	0	0	0	0
2896	PF3D7_1103100	60S acidic ribosomal protein P1, putative	RPP1	ATGGCATCAATTCCAGCATCAGAATTACCAGAATGTGAAAAGCAGGAACTTTTATGTACCTATGCTGCTTTAATATTACATGAAGAAAAAATGAGTATAACAAGTGACAATATTTTAAAGCTTATTAAAAATTCTAACAATACTGTTTTGCCATACTTACCAATGCTTTTCGAAAGGGCTTTAAAGGGAAAAGATATTCAGAGCTTATTAAGTAACTTAAGTGTAGGAAGTGCCCCTGCAGCTGCTGCCCAAGTTACAACTGAGAAACCAAGTGAAGACAAAAAGGAAGCCAAAAAAGAAGAGAAAGTAGAGGAAGAAGAAGAAGAAGATGATTTAGGTTTCTCCTTATTTGGTTAA	MASIPASELPECEKQELLCTYAALILHEEKMSITSDNILKLIKNSNNTVLPYLPMLFERALKGKDIQSLLSNLSVGSAPAAAAQVTTEKPSEDKKEAKKEEKVEEEEEEDDLGFSLFG	118	0	null	no	GO_0005622, GO_0005840	GO_0015934	GO_0005622,GO_0005840,GO_0015934	0	0	0	0	0	0	0	0	0	0	0	0	0	0	0	0	0	0	0	1	0	0	0	0	0	0	0	0	0	0	0	0	0	0	0	0	0
3109	PF3D7_1124900	60S ribosomal protein L35, putative	RPL35	ATGAGTAATGTTAAAGCTTATGAATTAAGGACCCTCAAGAAAAAAGAATTATTAGATAAATTAGATGAATTGAAAAAGGAGTTAAGTGGCTTAAGAATAAGCAAAGCCTTAGGGAACTCTGCTAAGAATTCCAAAATCCACGGCGTCAGGAAAAATGTGGCAAGAGTTTTGACAGTTTATAATCAAAAAAGAAAAATGGAATTGAGACAATTATACAAAAATAAAAAATTCAAACCATATAATTTAAGAAAAAAGTTGACAAAAAATAAAAGACTTCAATTATCTCCCAAACAAAAAGCAGCCATGACCTTAAGACAAAAAAAAAAAGTACAAAATTTCCCACAAAGAAAATACCTCGTTGTACACAAGGAATAA	MSNVKAYELRTLKKKELLDKLDELKKELSGLRISKALGNSAKNSKIHGVRKNVARVLTVYNQKRKMELRQLYKNKKFKPYNLRKKLTKNKRLQLSPKQKAAMTLRQKKKVQNFPQRKYLVVHKE	124	0	null	no	GO_0005622, GO_0005840	GO_0015934	GO_0005622,GO_0005840,GO_0015934	0	0	0	0	0	0	0	0	0	0	0	0	0	0	0	0	0	0	0	1	0	0	0	0	0	0	0	0	0	0	0	0	0	0	0	0	0
3285	PF3D7_1142600	60S ribosomal protein L35ae, putative	null	ATGGAAAATGTAAAAGTAAAAAAAGAACAAACGGAAGTATCTCAGAAAAAAAAAGTTGTCAAGAAGGTTTTAAAGAAAAATAAAAAAACATCTAACAAAAAACTCCAAGCTGTTCGATTATATGAAAAGGGAGTTATATTAGGATACAAAAGATCTCAAAGAAATCAAGATCCCAACTTTACATTAATATCCATTAAAAATGTGAACACGAAAAAGCACGCACAATTCTATGTAGGAAAAAGAGTTGCTTATGTTTATAGAACAACTAAACATCATGATGGAGTTAAAATAAAATGTATATGGGGAAAAGTATGTAGGACTCATGGTAATAGTGGTGTTATAAGAGCAAAATTTAAAACTCATATCCCACCTAAAGCTTTCGGTGATAGAGTTAGAATA…	MENVKVKKEQTEVSQKKKVVKKVLKKNKKTSNKKLQAVRLYEKGVILGYKRSQRNQDPNFTLISIKNVNTKKHAQFYVGKRVAYVYRTTKHHDGVKIKCIWGKVCRTHGNSGVIRAKFKTHIPPKAFGDRVRILMYPSNI	140	0	null	no	GO_0005622, GO_0005840	GO_0015934	GO_0005622,GO_0005840,GO_0015934	0	0	0	0	0	0	0	0	0	0	0	0	0	0	0	0	0	0	0	1	0	0	0	0	0	0	0	0	0	0	0	0	0	0	0	0	0
4116	PF3D7_1323100	60S ribosomal protein L6, putative	null	ATGAAAACTATAGTATCAACACAAAAAGTATTAATTCCTGAAGGAGTCAAGGTAGCCATAAATGCAAGAAAGGTAACCGTATCTGGTAAGTACGGAACCTTAAGAAGGAGCTTCAGGCATTTACCAATAGATATTAGATTAAACAAATTAAAGAAATATATTAAGGTAGTTATGTGGTTTGGTGTCCCTGACAGTTTAGCTTGTATTCGTACGGTTTGTACACATTTAAAAAATATGTTTACTGGTGTTACCAAAAAGTTCTTATATAAAATGAGATTAGTACATGCTCACTTTCCCATCAACTCTAATATTGTAGATAATAACACAAGAATCGAAATTAGAAACTACTTAGGAGAAAAAAGTGTTAGATTTGTTAAAGCCTTGCCAGGAGTTGTTATC…	MKTIVSTQKVLIPEGVKVAINARKVTVSGKYGTLRRSFRHLPIDIRLNKLKKYIKVVMWFGVPDSLACIRTVCTHLKNMFTGVTKKFLYKMRLVHAHFPINSNIVDNNTRIEIRNYLGEKSVRFVKALPGVVIEKSPNVKDEIYVSGADIENVSLTAALIHQSVLCRNKDIRKFLDGIYVSEVTTVEKDE	190	0	null	no	GO_0005840	GO_0015934	GO_0005840,GO_0015934	0	0	0	0	0	0	0	0	0	0	0	0	0	0	0	0	0	0	0	0	0	0	0	0	0	0	0	0	0	0	0	0	0	0	0	0	0
3122	PF3D7_1126200	40S ribosomal protein S18, putative	RPS18	ATGTCACTACAAGTAATAGATAATAATGATTTTCAACATATATTAAGAATTTTAAATACAAATGTAGATGGTAAAGAAAAAGTAATTATTGCCTTAACAGCTATTAAAGGTATTGGAAAGAGAATGGCAACTGTTATATGTAAACAAGCAAATGTTGACCCCACGAAAAGAGCAGGAGAATTAACTACTGAAGAAATAGATAATATCGTACATATTATGAGTACTCCTACCCAATTTAAAATCCCTGATTGGTTTTTAAACAGGAGAAAGGATTTGAAAGAAGGAAAAAATATTCATGTTATTGCTAACCAACTTGATTCTTACTTACGTGAAGATTTAGAAAGAATGAAGAAAATTAGATTACACAGAGGTTTACGTCATCACTGGGGATTAAGAGTT…	MSLQVIDNNDFQHILRILNTNVDGKEKVIIALTAIKGIGKRMATVICKQANVDPTKRAGELTTEEIDNIVHIMSTPTQFKIPDWFLNRRKDLKEGKNIHVIANQLDSYLREDLERMKKIRLHRGLRHHWGLRVRGQHTKTTGRRGRTVGVAKKKGA	156	0	null	no	GO_0005622, GO_0005840	GO_0015935	GO_0005622,GO_0005840,GO_0015935	0	0	0	0	0	0	0	0	0	0	0	0	0	0	0	0	0	0	0	1	0	0	0	0	0	0	0	0	0	0	0	0	0	0	0	0	0
708	PF3D7_0412100	30S ribosomal protein S12, mitochondrial, putative	null	ATGTTTTTTACCTTATCCAATAAGTTTAGTTATAAAAAAGGTACCCATGTAATTGTAAAATGTAATCCTTTTATTATAAATAATTTTTTCTTTAAAAAATGGATATATAAAATACCATATGATAAGAGTGAATTAATTTTTTCAAAAATGAAAAATGGGATAATCGGGGAAAATAAATATAATAACATATGTAGTAATCCTTTGTTAGAAGATAATCGTATTATAAGTATATCATATATGCATGATGATAAAATAATGAAAAATAAAACCCAAATAACAAACAATAATAATAATAATAATGATAATTATATTAATAATAATAATAATAATAATAATGGTATATTTATTAGTACACATACATCTTATCATTCCTATTTGTTCAACAGTGTAAAACGTTCA…	MFFTLSNKFSYKKGTHVIVKCNPFIINNFFFKKWIYKIPYDKSELIFSKMKNGIIGENKYNNICSNPLLEDNRIISISYMHDDKIMKNKTQITNNNNNNNDNYINNNNNNNNGIFISTHTSYHSYLFNSVKRSFSTKNIRGRLFYKRRPKQIPKLKKKNWRSKWLEGAPQKRGICLKVRVQTPKKPNSGLKKIARVRLSTGRIVSVYIPGIGHNLNTHSIILVRGGRCKDIPGCNYKAIRGVYDLLPVKNRFRGRSKYGVKLSEDKRKHLLERYNFKHITIKKDRDEFNKYKWFNYVDKDKKLREKPLDPEENVPINIFHFNTYYRNKKFQQNSDA	336	0	null	no	GO_0005622, GO_0005840, GO_0015935	GO_0015935	GO_0005622,GO_0005840,GO_0015935,GO_0015935	0	0	0	0	0	0	0	0	0	0	0	0	0	0	0	0	0	0	0	1	0	0	0	0	0	0	0	0	0	0	0	0	0	0	0	0	0
3232	PF3D7_1137100	mitochondrial ribosomal protein S9 precursor, putative	null	ATGATAGGTATAAAATCTTTAAGAAATTTCATTTTAAAAAATATCAAGGAAAATATTAATAAAGGATTTTTTATTCAATACATACATAATTATTCTACACAAAATGAAATAAGTAAAAAATATAAAAATGATTATATTTTATCCTTAGATGAAGCATTATATTTATCTAAAGAGTTGGGAATTAAGACAACTACAGAGATCCAAAGAATTATTATGAGGTCCCCACCATTTTCTCCAGATACAAGTCCGTTCGTTATTGAAAATTTTTTTTCTAGTGAACGACAAGAAAATGATTTAGAAGAATTTTCAGAAATTGATAAAAAAATTATGGAATTAGAAACGACAAAAAAAGAAAAAGAGGAAGATAAAAAAAACCAAGGTGATTTTTGTTCTAATAAT…	MIGIKSLRNFILKNIKENINKGFFIQYIHNYSTQNEISKKYKNDYILSLDEALYLSKELGIKTTTEIQRIIMRSPPFSPDTSPFVIENFFSSERQENDLEEFSEIDKKIMELETTKKEKEEDKKNQGDFCSNNIKISECENNYNDSIINKILIDNFNKKRVKTFWHDNNEWLEESEGIGTNKRSCAYVYIKRGSGIIKINDKEDLYIRWPYFYNRMDVLEPFYITNTACVFDVFIKLKGGGISGQSKAARLAVGRALLNACPHIYNELKQHDILYEDMRQKFPKMPGRKKSRAMKQWSKR	300	0	null	no	GO_0005739, GO_0005840	GO_0015935	GO_0005739,GO_0005840,GO_0015935	0	0	0	0	0	0	0	0	0	0	0	0	0	0	0	0	0	0	0	0	0	0	0	0	0	0	0	0	0	0	0	0	0	1	0	0	0
60	PF3D7_0106800	ras-related protein Rab-5C	RAB5c	ATGGCTTATTATTTATCAAATTTAAATAATAATGAAAAATATGAAACCAACCAAAGTTATAATTCTACAAAAGTTTTTAATTCTAAACTAGTTTTATTAGGAGATACATCTGTTGGGAAATCTTGTATCGTTGTAAGATTTGCTAAAAATGAATTTTATGAATATCAAGAATCAACTATTGGTGCTGCTTTTATGACCCAGTTAATTGATATTGGTGAATGCACGATTAAATTTGAAATATGGGACACAGCAGGACAAGAACGTTATAGAAGTTTAGCTCCGATGTATTACAGAGGTGCATCGGCAGCCGTTATAGTTTATGATATAACAAATAAAAAATCCTTTGAAGGAGCTAAAGGATGGATTCATGAATTAAAATCAGTACACTCAAATGATATA…	MAYYLSNLNNNEKYETNQSYNSTKVFNSKLVLLGDTSVGKSCIVVRFAKNEFYEYQESTIGAAFMTQLIDIGECTIKFEIWDTAGQERYRSLAPMYYRGASAAVIVYDITNKKSFEGAKGWIHELKSVHSNDIIIALAGNKNDLEEHRAVDRELAESFANSNNILFIETSAKTGQNVNELFLRIAKKLPLHKKEQEKCPAIQINNTEETKKKCC	214	0	null	no	GO_0005622, GO_0016020	GO_0016020	GO_0005622,GO_0016020,GO_0016020	0	0	0	0	0	0	0	0	0	0	0	0	0	0	0	0	0	0	0	1	0	0	0	0	0	0	0	0	0	0	0	0	0	0	0	0	0
1828	PF3D7_0807300	ras-related protein Rab-18	RAB18	ATGAAAAATAAAAATAAGTATGATTATTTACTAAAATTATTATTAGTGGGTGATTCCAGCGTAGGAAAGAGTAGTATATTATGTAGATACTCCGATAACCAATTTGAAGAGAAAGTTTTATCCACAATAGGTATTGATTTTAAAGTAAAATATTTAAAAATCGATAATAAAACAATAAAAGTAGGAATATGGGATACGGCAGGTCAAGAAAGATTTAGAACTTTGACTTCTGCGTATTATAGAAATGCTCACGCAATTATTCTTGTATACGATTGTACCGTTAGAGAATCCTTTGAAAACCTAGACGTTTGGATTAACGAGATAGATAAATATTCTACCAATAAAAACGCGATAAAAATGCTTGTTGCCAATAAAATTGATAAACCTAATCATGAAGTT…	MKNKNKYDYLLKLLLVGDSSVGKSSILCRYSDNQFEEKVLSTIGIDFKVKYLKIDNKTIKVGIWDTAGQERFRTLTSAYYRNAHAIILVYDCTVRESFENLDVWINEIDKYSTNKNAIKMLVANKIDKPNHEVTKDEGKNFAFENNMLFCETSAKNDINITYCFEELIQQILNNPSLLELSIVTKNLKLGKKEESRSNCAC	201	0	null	no	GO_0005622, GO_0016020	GO_0016020	GO_0005622,GO_0016020,GO_0016020	0	0	0	0	0	0	0	0	0	0	0	0	0	0	0	0	0	0	0	1	0	0	0	0	0	0	0	0	0	0	0	0	0	0	0	0	0
4285	PF3D7_1340700	ras-related protein Rab-11B	RAB11b	ATGTCTAATGAAGAATACGATCATCTGTATAAAATAATTTTAGTAGGTGACGCAACAGTAGGTAAGACACATTTGCTATCGAGATATATAAGGGGATCTCTTCCTAGTGTAGCAAAAGCTACTATCGGTGTAGAATTTGCTACGAGAACCATTCCATTAGCAGTCGGGGGCACGGTCAAAGCTCAGATATGGGATACTGCCGGCCAAGAACGATATCGAAGTATAACTAGCGCACATTATAGGAGAAGCGCAGGGGCTATATTAGTATATGATATAACTAAGAAGAAAACATTTTTAAGTATATCAAAATGGTTAGAAGAAATAAGACAAAATGCAGATAAGGATATTGTCATTATGCTTGTTGGAAATAAGGTAGATTTAACTGAAGAAGACGAAACT…	MSNEEYDHLYKIILVGDATVGKTHLLSRYIRGSLPSVAKATIGVEFATRTIPLAVGGTVKAQIWDTAGQERYRSITSAHYRRSAGAILVYDITKKKTFLSISKWLEEIRQNADKDIVIMLVGNKVDLTEEDETKRKVTYEQGANFARENNLFFAEASAVSKLNVKHIFENLLQEIYNNRLKNNNRSFSNRSVATCESAIQLTKARSVIKLNEVYDNQSEDNNMNKVKCC	229	0	null	no	GO_0005622, GO_0016020	GO_0016020	GO_0005622,GO_0016020,GO_0016020	0	0	0	0	0	0	0	0	0	0	0	0	0	0	0	0	0	0	0	1	0	0	0	0	0	0	0	0	0	0	0	0	0	0	0	0	0
4131	PF3D7_1324600	conserved Plasmodium protein, unknown function	null	ATGAATGAATATGTAAAATATACAACTAGCTTTTATGTTTTTGACCTATATAAATATGATACTAGTGAGGAATTTTTAAAAAGTTTACAATTAATAACGCATGAAGATATAATAATTATAAGTTTACAAAATGTTGCTGACCAAAACTTGAGAGAGACCTATGAAAGTATTATTAATAAACAATGTAACCAGAACAAGGAATATGTGTTTCTACATTTAGATTACAAGTTAGAAAACGATCTATTTCTTCTTATGATTAAAAGAGGATTACATACTTATGTTGAAGATGTATATTATAAAATCATAAAGATATCTACTAAAAATATGTTTGGAAAAATATATAAAAAAGTTATGAAATATTACTTTATTGATTATATACAAAAAGTAATAAATACAAAT…	MNEYVKYTTSFYVFDLYKYDTSEEFLKSLQLITHEDIIIISLQNVADQNLRETYESIINKQCNQNKEYVFLHLDYKLENDLFLLMIKRGLHTYVEDVYYKIIKISTKNMFGKIYKKVMKYYFIDYIQKVINTNNHSIQIKCNKRMDGNNNVSTYFGNEEKKKEFNITLRKDMLLYQMDHRKYFNYLNKCFQHAKNINLKNDVNIKNKNMNKKFNHSFSHQYNINQYEIFKKKKIQMKGTYSHDNTFNHNFAYHYNSDTILVGDRKERYAINHNICNMKNKKEIYTHNSNNIYDNNNNKKCFNNNNIYDNNNNICDNNNNICDNNKKYDRNILHCITLMINNIRFCICFCNFDIYKYIETKSYYQYIFYKERERKNNFYKDKENNPFYISYMNYHLNLYN…	1661	3	null	no	GO_0005737	GO_0016020	GO_0005737,GO_0016020	0	0	0	0	0	0	0	0	0	0	0	0	0	0	0	0	0	0	0	0	0	0	0	0	0	0	0	0	0	0	0	0	1	0	0	0	0
1096	PF3D7_0526900	transmembrane emp24 domain-containing protein, putative	null	ATGATGAAAATAATTAAAGAAGTAAGAGCAGTTGTACTTTTGTTATTTGTTTTACTTTTGAATTCGTCTAATGTAAAAGCTGCTTATTTTTTTGTGAAAGAAGGTGTTGATAAATGTTTTGTTGAGAGTGTAGCAAATAATGTCGTTATAACAGCAACATATGATAATTATGGTTTGAAGGATGTAAAATGTCTTATTAATATAAAAGATCAACAGGGAAAAGTATTATATTCTCATGATACATCCAAAATAAGGAAAGGAAAGATATCATATTTATCTACTAAGGATGGGTTATATCATATTTGTATTTCATGTCCTTCAACCAACTGGTTTAAAAGTACAGCAATAAAATGGAGCTTGTCAATTGAAGTTGGAGGTTCGGATATTGATCCTGAAAAT…	MMKIIKEVRAVVLLLFVLLLNSSNVKAAYFFVKEGVDKCFVESVANNVVITATYDNYGLKDVKCLINIKDQQGKVLYSHDTSKIRKGKISYLSTKDGLYHICISCPSTNWFKSTAIKWSLSIEVGGSDIDPENLAKKSELSETLTILNNLKKKFNSMKLQQIYQKQMASNLYEYNKSVHNKMFYCYIVEIIILVVITVYSIIHLKNYFKAHKLM	214	2	HMM: MMKIIKEVRAVVLLLFVLLLNSSNVKAA, NN: MMKIIKEVRAVVLLLFVLLLNSSNVKAA	yes	GO_0005794, GO_0000139, GO_0005783, GO_0005789, GO_0016021	GO_0016020	GO_0005794,GO_0000139,GO_0005783,GO_0005789,GO_0016021,GO_0016020	0	1	0	0	0	0	0	0	0	0	0	0	0	0	0	0	0	0	0	0	0	0	0	0	0	0	0	0	0	0	0	0	0	0	0	0	0
2774	PF3D7_1030900	ookinete surface protein P28	P28	ATGAATACATATTTTAAGGTACTTCTTTTTTTATTTATTCAACTTTACATAACGTTGAATAAGGCTCGGGTTACTGAAAATACAATATGTAAATATGGTTATTTAATTCAGATGAGTAATCATTATGAATGTAAGTGTATTGAAGGATATGTATTAATAAATGAGGACACGTGTGGAAAAAAAGTAGTCTGTGATAAAGTTGAAAATTCATTTAAAGCTTGTGATGAATACGCTTACTGTTTCGATTTAGGAAATAAGAATAATGAAAAACAGATAAAATGTATGTGCAGAACAGAATATACTTTAACTGCTGGAGTATGTGTTCCTAATGTTTGTCGAGATAAAGTATGTGGTAAAGGAAAATGTATAGTAGATCCTGCAAATTCTTTAACACATACA…	MNTYFKVLLFLFIQLYITLNKARVTENTICKYGYLIQMSNHYECKCIEGYVLINEDTCGKKVVCDKVENSFKACDEYAYCFDLGNKNNEKQIKCMCRTEYTLTAGVCVPNVCRDKVCGKGKCIVDPANSLTHTCSCNIGTILNQNKLCDIQGDTPCSLKCAENEVCTLEGNYYTCKEDPSSNGGGNTVDQADTSYSVINGVTLTHVLIVCSIFIKLLI	218	0	HMM: MNTYFKVLLFLFIQLYITLNKAR, NN: MNTYFKVLLFLFIQLYITLNKAR	yes	GO_0009986, GO_0016020	GO_0016020	GO_0009986,GO_0016020,GO_0016020	0	0	0	0	0	0	0	0	0	0	0	0	0	0	0	0	0	0	0	0	0	0	0	0	0	0	0	0	0	0	0	0	0	0	0	0	0
482	PF3D7_0313300	YGGT family protein, putative	null	ATGCCTTTTCTTCTTTTCTCATTCTTTTTATTTTTTTTATTAATAAATCAAAAAAACAATATAGAAAGTAAGCGTACTAATATATCCAAGCTAAAGGCATTTATAGTTTCCCCTCAGAAGAGTAAAAATAAGATAATAATATTAAATAATAAAAATAGTAGTATAATTAATAATAAGGTTATTAAGAAGAATATCCAGAGAAATATTTTTTTAAAAGAAAATATACGGGGTGTACTAACAAATAAGAGCGTCTTCAAATTAAATTTGTTTGCTTCATCGTACGTATCCCCCATAATAAACTTCTTCTTATCAAATAAGGGAAGTATAAAATTGGCATCATTACATTTTATAAGGATATACAAATTTATAATATATATAAGATGCTTGTTGGAATGGCTA…	MPFLLFSFFLFFLLINQKNNIESKRTNISKLKAFIVSPQKSKNKIIILNNKNSSIINNKVIKKNIQRNIFLKENIRGVLTNKSVFKLNLFASSYVSPIINFFLSNKGSIKLASLHFIRIYKFIIYIRCLLEWLPQINPHLNPFVFIFTFTNNYVQFFHKIIPNVFGIDLSGIFSWLFLEMIENYLST	187	0	HMM: MPFLLFSFFLFFLLINQK, NN: MPFLLFSFFLFFLLINQKNNIESK	yes	GO_0016020	GO_0016020	GO_0016020,GO_0016020	0	0	0	0	0	0	0	0	0	0	0	0	0	0	0	0	0	0	0	0	0	0	0	0	0	0	0	0	0	0	0	0	0	0	0	0	0
1064	PF3D7_0523800	transporter, putative	null	ATGGAAAAGGATTTTACTGAGAGGAGCACTAAAGGCCAAAGGAAGTTGGCTAACGGGGTGGTAGAAAATATAGAATCAAAATTGAAGAACCATTTGGATAACAACAACGTAATTAATAAAAGTGTGAATTATGAAGATGTGATGTGTTCTAATGTAAAATTGTCAGTACATGATGATGAGTATGATATAAAGAATATAAAAAAGGATGTATGTAATTTGAGCAAATTAAGTGAAGAAAGATTGAGTAATAATATCTCGTTAAAAGATAATAATAAAGTTGTAAAAAATCCAGAAATAGACACTAAAACAGCTAGGCAACAATATAAGAAAAGATTAAATTCTACACAATCAACTATGAATATTGAAGGAAATATTAATAATGAAAAGGATGACATTATT…	MEKDFTERSTKGQRKLANGVVENIESKLKNHLDNNNVINKSVNYEDVMCSNVKLSVHDDEYDIKNIKKDVCNLSKLSEERLSNNISLKDNNKVVKNPEIDTKTARQQYKKRLNSTQSTMNIEGNINNEKDDIIEDYDDGLIRNMDYEMSIVKNKRNNNNNNNNNNNNNNNNNNNNNNNNNNNNNNNNSNNVDNRKRNKNEECYDESYCISDNLDEITSYRNKLSLYNKLRMCFNYFGPGWIVAIAYLDPGNLCSNLNVGLIRSPDPTLEKDYSGYYLLWIMVYGHMLGFIFQVLSMRLGHVTGLDLASLCSKEFDRTTSTIIYVLVQIAIWGAHIQAIIGTFIALNLIFGISVKVAIFYTLFEAIIYSFLENKSLGLLENVLSFLVGILAVSFFVNVFM…	684	11	null	no	GO_0016020	GO_0016020	GO_0016020,GO_0016020	0	0	0	0	0	0	0	0	0	0	0	0	0	0	0	0	0	0	0	0	0	0	0	0	0	0	0	0	0	0	0	0	0	0	0	0	0
3698	PF3D7_1235200	V-type K+-independent H+-translocating inorganic pyrophosphatase	VP2	ATGGTAATGCTACCACTTCATGAAAATAGTTCAACTATCAGAAAAAAATATAAGAAGAATAATAAATTTTTCGGAGGTGAAACATCTGTAAAGAATTTTTTGGAAAGATATTCTTTTACAAATAAAAAAGACAATAAAAAAAATGAGAAAGGAACAAAATTAAATATTCTAAAATATATGAAATTATATATGCAAAAACCTGTAAAACATCGTATAACATTTAATATAATTGTATTCACGTTGTTTTTAGTTATAATATATATTTTTTATCACAAAATTGAAAATATTAAAACAGTATTCTTAATAAGTTTAACATTATACAGTTTGTATTTCTTATTATTTTCTCTTTATATGTTAAGTACTATATTAAATGATGAATATGGGGATTATAATACATTG…	MVMLPLHENSSTIRKKYKKNNKFFGGETSVKNFLERYSFTNKKDNKKNEKGTKLNILKYMKLYMQKPVKHRITFNIIVFTLFLVIIYIFYHKIENIKTVFLISLTLYSLYFLLFSLYMLSTILNDEYGDYNTLKKYDMTNNIYMNDNELNLINDKNDVQQINNSQNNNDNYVHQMTNDHNIQKKEIKKEYEKLKYDNHNNNENNLINPYNLEQNNQTFNQHISNEYEKNNINLIHTKNTNNDNKGDMKNEIGTNEGYEISSFDSIGIPIKEGSEGFFTVQYNSIFKISIVFTLLILSLYIIRGEDTKLPQGDNQMTDMMNNNNNNNNNNNNNSSSSNGTIIISSYAYGIITAISFLLGALCSSIAGYNGIYVAVRANVKVAKAATYSYKKALITCFRSG…	1057	16	null	no	GO_0016020	GO_0016020	GO_0016020,GO_0016020	0	0	0	0	0	0	0	0	0	0	0	0	0	0	0	0	0	0	0	0	0	0	0	0	0	0	0	0	0	0	0	0	0	0	0	0	0
299	PF3D7_0216600	MtN3-like protein	null	ATGGGTATTATAAAAAGAATACTACTTTTACAAATTGTTTTAGTTCTTGTGTTATGTTGTCATAGGATAAGATGTGAAGAAGTAAGTAGCATATCGAATAAAGCATCCGTTAAGGATGAGGGGCAAAATAATAATAGTAACAAGAGTAATAATAACAATAATAATAATAATAATAATAACAATAATAATAATAATAATAATAATAATAATAACAACAACAATAATAATAATAATAACAACAATAATAATAATAATAATAACAACAATAATAATAATAATAATAATACCTCTGGTTTAAGCGTAAAATCAGAAAATTTTAATATGATCATAAAACCTGAAGGGGACGAGCAATCCCCTTTAAATTCTTTATCCGTTGAACAAAAAAAAGATACTCCTCAA…	MGIIKRILLLQIVLVLVLCCHRIRCEEVSSISNKASVKDEGQNNNSNKSNNNNNNNNNNNNNNNNNNNNNNNNNNNNNNNNNNNNNNNNNNNNNNTSGLSVKSENFNMIIKPEGDEQSPLNSLSVEQKKDTPQIEELRKKEETKDQKVTEQVNNLQSKNEKLTNTLDQVVQGDNNNNTLDTTTSETSSSSTTNTNNNNNNNINNNSNSNNNNSNINNNNNINNNNNNIYLGHNNNLDSNIIQQTNFIENTEHNVQKQNEKKENNNTSGSTSKSSSSQNLENSKEVEQAVVKEITPKEETSNGQNKDKEKILSNVQNDATNKKMVNDNTKGLSSDNMNSSNDLNAPNKMNEDSKGSSEYVDLASQKIYDEMNKNVEESGSNLYFLKLLSIGSSIFMQLIF…	686	7	HMM: MGIIKRILLLQIVLVLVLCCHRIRCE, NN: MGIIKRILLLQIVLVLVLCCHRIRCE	yes	GO_0016021	GO_0016020	GO_0016021,GO_0016020	0	0	0	0	0	0	0	0	0	0	0	0	0	0	0	0	0	0	0	0	0	0	0	0	0	0	0	0	0	0	0	0	0	0	0	0	0
1427	PF3D7_0628400	protease, putative	null	ATGCAATATGAACTATTGATTAATAATTATAATGAAGATGAACATAAAGATAATACAGATCGACTGTCTTTTATGAAATTTATTCGATTTTTGTATTGCTGTTTCTCTGTAATGCTTTTAATTGGTTTTTCTTGTATCACTAATGGGAACAGAGGAATTGGATTTTTACTTTTTTCATTTTTTCCAAGTTTTTTTTATTTATATATGTTTAAGAAAAAAATCCAAAGGGAAATAAGCTTTGTTCATGTAATAGAAATGGTACTATATGGATCAATCATATCAGTGATTTTTGCCAGTGTTTTAGAATATGTTTTATCATTTTATTTTTTTTATTTTTCCACTATGTGTTTTACAAATGAAGTAAAAAGGTCCCTTTATTTTGCGTATTCCATAATCGTA…	MQYELLINNYNEDEHKDNTDRLSFMKFIRFLYCCFSVMLLIGFSCITNGNRGIGFLLFSFFPSFFYLYMFKKKIQREISFVHVIEMVLYGSIISVIFASVLEYVLSFYFFYFSTMCFTNEVKRSLYFAYSIIVFFYFFFIIAYVEEFSKIIPMLFVYINIPHYKNEYKELPLVNESHILEDPNYEEGENVQEYRRTKLQYIIVNDELEYIFFSLCSSAGFSSTENLFYSTQTTKDNFFCIIILRNLICVLFHMCCTGISSYNIYNYVNHKYKKGCFLRCVYILGSLFSSSLFHAVYDYTIYFSSMNIPSYQIIFLKILFTYSFISILLMFFFSVIRNMI	339	7	null	no	GO_0016021	GO_0016020	GO_0016021,GO_0016020	0	0	0	0	0	0	0	0	0	0	0	0	0	0	0	0	0	0	0	0	0	0	0	0	0	0	0	0	0	0	0	0	0	0	0	0	0
2204	PF3D7_0912200	conserved Plasmodium membrane protein, unknown function	null	ATGAGAGTATGTTATTTAAGAGGGTGCTTATTATGCATAATAACAATTGTTTTGTGGTCGAGGATTTACAAAGTTTATGGTATGGATTCCTTATTTTCTTTTAACAATATGTTACCTATGTATAACATTTTAAAAGGGAAGCATCATGTAAGTATGAGTGATTTGAAGATCAGCGAGAGTTATTTATTTAAAGAGCCAAAGAATATAAATATCGATTTGGCTTTGTTGGCTTTAAAAGGTATGGATAGAGAAAATAGGAATATGTTTGATTATAAAAGTAAGAATAATGATGATAATAATAAAAATGTAGAAAGGATTTTATGGAATAAAATGAATAAGGATGATTTTATTTATTCAAAATTGGAGGTTGATGATAAATTAATAAAAGGATTGCCCGAT…	MRVCYLRGCLLCIITIVLWSRIYKVYGMDSLFSFNNMLPMYNILKGKHHVSMSDLKISESYLFKEPKNINIDLALLALKGMDRENRNMFDYKSKNNDDNNKNVERILWNKMNKDDFIYSKLEVDDKLIKGLPDILNINNIRHDIKRNMLTYLNNYRYDNENMEIIFKGENKIPYIYNNILFILLIFFMYLFCIRILYDGYRIGKLVAKDFIPKISTLFMFFVLLKSTLLLFPPVLCVLLCIFLTFYFYTISMNSCQDIYFLDFGKIKKEPIGWIFIVFSHSILLGNIIYHLLFRPSVFIYLHNLIENYFIEHILCVIILIVMSIFIFFLMISNIFPATKLQNFVFSFTSSYFLLSFCSYLYNLFVFLMYDKTKRFNIIQIEPYMFFSSTSIFSFNFPNS…	453	7	HMM: MRVCYLRGCLLCIITIVLWSRIYKVYGM, NN: MRVCYLRGCLLCIITIVLWSRIYKVYGM	yes	GO_0016021	GO_0016020	GO_0016021,GO_0016020	0	0	0	0	0	0	0	0	0	0	0	0	0	0	0	0	0	0	0	0	0	0	0	0	0	0	0	0	0	0	0	0	0	0	0	0	0
2244	PF3D7_0916300	conserved Plasmodium protein, unknown function	null	ATGGATCCATATAAATTTAATAGTTGGATAAGGTTATTAATTTCGTTATGTTCAACGGGTGCATACATTTTAATATCCTTGATGCTGCCTTTGTTTGTGGCAGTACCAAGTTTTGAAACAACATATGGTATATTCTTCGTTAGCCCATATAATGACAGCAAATATATAAAGTGGCATGAATTTGAATCACATGCTTGTAAAAATGAAAATGTTGCCTTACCTCAGATCAATTATAATGCCTCGAAGGGAAAAGAGTTCACAAGAAATATGAGAAAGCAATTATGCCATTCTATAAACTTTCTTAAAAATTATTTATTAATTACTTTTATAGTGTCTATCATAGATTTAATTGTAGTTAAGGGAGTACTATTATATGCTCATTTCAGGGAACATCCTGAA…	MDPYKFNSWIRLLISLCSTGAYILISLMLPLFVAVPSFETTYGIFFVSPYNDSKYIKWHEFESHACKNENVALPQINYNASKGKEFTRNMRKQLCHSINFLKNYLLITFIVSIIDLIVVKGVLLYAHFREHPETFALKHVKFCNKLITLIICITITNCILLVAPVFFFNSYEEFGKTHYLHAGFYILLADFLTHFIIVIFLKRDKTILKYVCELELIPWDEKRKLPVHYAEFNDTLISPNEITNYLQGLFQQDNINEEQLKNFFGTDNYEQIYYVILNNLKNQKQMMNITPM	292	4	HMM: MDPYKFNSWIRLLISLCSTGAYILISLMLPLFVAVPSF, NN: MDPYKFNSWIRLLISLCSTGAYILISLMLPLFVAV	yes	GO_0016021	GO_0016020	GO_0016021,GO_0016020	0	0	0	0	0	0	0	0	0	0	0	0	0	0	0	0	0	0	0	0	0	0	0	0	0	0	0	0	0	0	0	0	0	0	0	0	0
4527	PF3D7_1365700	SNARE associated Golgi protein, putative	null	ATGGCGCATATAGAGAATCATAAGAAGAAAAAATACGAGTATCTACCTAAAGATTATGATACGATATTTAACCCCAATGAAAAAGAAACAGAACTTTTAAATCAACATTATAACTCTGGAATAAATTATAATTACGACACAAGTGTAAAACATGGTGATAATAATGATAATGTTTATAATAATAATAATTATAATGACTACTTGTCAAATAATCCAAGTAACTTTCAATATATGAAAAAAAATAAAAAGAATAAAACAAATATGGAGAAAATTAAATTAATAAATAAAATACCACTACATCAACAAATGAACAACGCAAATGAATATGATCATATAAATATTAATTATGATAGTAATGATGAATGTTTAGAAACACATTATGATTTTGAAAATAAATAT…	MAHIENHKKKKYEYLPKDYDTIFNPNEKETELLNQHYNSGINYNYDTSVKHGDNNDNVYNNNNYNDYLSNNPSNFQYMKKNKKNKTNMEKIKLINKIPLHQQMNNANEYDHININYDSNDECLETHYDFENKYNNDKNLENRILIESEDFISSRRNSTRSKMVIAGKIVLAILFFILVVFLFTRFKNFLNIIHIVIEWVGKQGSWSILLFILLFTFLSPLFMSVEIMCVGSGLIFSGVYGKALGIFVAVFSVAVGYVLGMSLCFFISRYLIHNYIYKKLMGYPIYMAFNQAINTNGLSFVLLIRLSPILPASVVSYILGVTSLKYKHFAIGSISALPSIFLFVYIGVLLQDISNLSELENHWTNLIILFVGFLIGVIAIVYISVITKRRLNNLNIMNAS…	408	6	null	no	GO_0016021, GO_0005886	GO_0016020	GO_0016021,GO_0005886,GO_0016020	0	0	0	0	0	0	0	0	0	0	0	0	0	0	0	0	0	0	0	0	0	0	0	0	0	0	0	0	0	0	0	0	0	0	0	0	0
1018	PF3D7_0519200	V-type proton ATPase 16 kDa proteolipid subunit	null	ATGCGACAATGTGATCCTAATTCAGCTTTTTTTGGATTTATGGGAATTGCAGCTTCCTCAATATTTTCTAATTTAGGAGCTGCCTTTGGTACTGCTAAGAGTGGTGTAGGTGTATGCAGTGTCGGAGTAATGAGACCAGATTTAATTATGAAATCCATTTTGCCTGTGGTTATGGCTGGTGTTCTTGGTATTTATGGAATTATTATGTCCATTTTGATATATGGAAAAATGACACCAGCTGAGGGCTATTCCACTTTTGCTGGATATGCCCATTTATCCTCAGGATTAATAGTAGGATTAAGTTCATTGGCTGCCGGTTTAGCTATTGGTATAGTAGGAGATGCTGGTGTAAGAGCAAATGCACAACAAAATAGATTATTTATTGGTATGATTTTGATT…	MRQCDPNSAFFGFMGIAASSIFSNLGAAFGTAKSGVGVCSVGVMRPDLIMKSILPVVMAGVLGIYGIIMSILIYGKMTPAEGYSTFAGYAHLSSGLIVGLSSLAAGLAIGIVGDAGVRANAQQNRLFIGMILILVFSETLALYGLIIGIYISIAETPKLCTPYNV	165	4	null	no	GO_0033179, GO_0033177	GO_0016020	GO_0033179,GO_0033177,GO_0016020	0	0	0	0	0	0	0	0	0	0	0	0	0	0	0	0	0	0	0	0	0	0	0	0	0	0	0	0	0	0	0	0	0	0	0	0	0
1823	PF3D7_0806800	V-type proton ATPase subunit a, putative	null	ATGGGTATATTTCGATCGGAGATTATGAAACACGGGACATTAGTGCTGCCTTCTGATAGGGCAAGGGAATATTTGGATTGCTTAGGAAAAGAAGTGGATATACAATTCATAGATATGAATGAGAAAACAATGAAAAGACAATACAAAAAATATATTCAGCGTATTGATGATATGGAAAGGATATTACGTTTTTTAGAAGAGAATATTAATAAATTACCAAATGTAAAAATAAAAAAGAGTAAAATAGATAATTTTTTAGAACATGATAATATATATGAACTTGATCAAGTGGAAGAATCTTTAAATCGATTGCATGTTCAATTCGTACGTTTTTGTAATAATAATAAAGATCTTATAGATGAAAAAAATAATGCTATAGAAGAGAAACATGTTATATTA…	MGIFRSEIMKHGTLVLPSDRAREYLDCLGKEVDIQFIDMNEKTMKRQYKKYIQRIDDMERILRFLEENINKLPNVKIKKSKIDNFLEHDNIYELDQVEESLNRLHVQFVRFCNNNKDLIDEKNNAIEEKHVILTALNQLSPGFIRGVGGLRGSVIGGDQQQQHHHNNNNNNNIVSPFDEGIEENNISLSTHIMKDGINMMFTNISGVIKTKDQESFSRTIFRAFRGNTYTYFQNIDEDADDNDLLKNVEELESLKSAGDTNNMYKNNKQHDTFSDKLDGKDKNDKKKKKDLKSVFVVYCQGSAQSNIYDKIMKICKAYDVKTYDWPRTYEHAKKRLKELREIINDKEKALKAYEEYFINEIFVLINVVEPNKNSLIEEWKLFCKKERHIYNNLNYFEGS…	1053	6	null	no	GO_0033179	GO_0016020, GO_0016469	GO_0033179,GO_0016020,GO_0016469	0	0	0	0	0	0	0	0	0	0	0	0	0	0	0	0	0	0	0	0	0	0	0	0	0	0	0	0	0	0	0	0	0	0	0	0	0
1517	PF3D7_0705900	ATP synthase subunit C, putative	null	ATGATGAATAAGTTTTTTTATAATACTTTAAATTCATCTCTTTTTCAAAATTTTAAATTAAAGAGCTCATATTTGAGCAGTGGATATTTTTTCTCTAATAGAAGTATAACAACCAATGTGAACAAATCCTTTATTTCTAATTACTTATTTAAGGAAAATAATTTTTTTAGATCTTATCACACCTCACCATTTATATGTAGATCAGTTAGTAATTCAAATTGTAACACCCTCCTTCAAAAGGATGAAAAATATAATGTTAACAAACAATTTGGTGTCAGACACGATAGTGGCATTGCAAGTTTATCAGCAGCCATTGCCTTAATGTCAGTTGGAGGGGTTGCTCAAGGTATAGGTAACCTTTTTTCGGCTTTGGTTTTAGGAACTAGTAGAAATCCATCA…	MMNKFFYNTLNSSLFQNFKLKSSYLSSGYFFSNRSITTNVNKSFISNYLFKENNFFRSYHTSPFICRSVSNSNCNTLLQKDEKYNVNKQFGVRHDSGIASLSAAIALMSVGGVAQGIGNLFSALVLGTSRNPSIKDELFTYTLIGMGFLEFLGIICVLMSAVLLYS	166	2	null	no	GO_0045263, GO_0033177	GO_0016020, GO_0016469	GO_0045263,GO_0033177,GO_0016020,GO_0016469	0	0	0	0	0	0	0	0	0	0	0	0	0	0	0	0	0	0	0	0	0	0	0	0	0	0	0	0	0	0	0	0	0	0	0	0	0
1233	PF3D7_0609100	zinc transporter ZIP1, putative	ZIP1	ATGGATTTGTTATTTGCAAAAATAATTTGTATTGGTATTTTTTTGGTAGTAACAACCTTTGGTTGTTTTATTCCTCATTTAATGGGATTGTACAAAGAAAAAGAAAATGAAGAAAAAAATAAACGTGTTAAAAATATTCTTTCAAACTTGAATTGTTTTGGTTCAGGTTTTATTTTTTCAATTATCATGTTTCATTTATTACCCGAAACTATACATATAATTAGTGACCATGGGAATATAAGAATTTTTAATACATCAGATAGTCAGATGAAAATTTTGTATATCTTTTTCTTTGTATTTATTGGTTTCTGCATGCAATTAGGTTTAGAATATGTACTTCCAGTAGATACTAATATTTGTTGCGTTTCAAATCTAGATTCAAAAAAGAAATTGGAAGAC…	MDLLFAKIICIGIFLVVTTFGCFIPHLMGLYKEKENEEKNKRVKNILSNLNCFGSGFIFSIIMFHLLPETIHIISDHGNIRIFNTSDSQMKILYIFFFVFIGFCMQLGLEYVLPVDTNICCVSNLDSKKKLEDTLSQHITKNASTTVNIEMQNIDNIDHIHEHSCEGVHTHDEKSIGKFLEILTLQSFFLTISLAIHSCIEGMIIGTSTDVNYVFISSFCILLHKWIAGVTVSLSLNSNNMNKTLKAILLLTFVFASPLGIVLGHMAKSAGQKVTCLINAVSIGTLLFIGCEILLNEIKQNISRKVRLCKWLSFCFSCLIAFALISFTTSMAPHTHGDIDTHVHVHHHDHDHDHGHNH	358	8	HMM: MDLLFAKIICIGIFLVVTTFGC, NN: MDLLFAKIICIGIFLVVTTFGC	yes	GO_0016020	GO_0016021	GO_0016020,GO_0016021	0	0	0	0	0	0	0	0	0	0	0	0	0	0	0	0	0	0	0	0	0	0	0	0	0	0	0	0	0	0	0	0	0	0	0	0	0
991	PF3D7_0516500	major facilitator superfamily domain-containing protein, putative	MFS1	ATGGAAGTAACATCAACCTTATTAGAAAAGGGTAAAAACTTTGCCCAAGATCCATCTGAGGTTTTTCCTGAGTCAAAAAAATTTTTTTTTTCGTCAATTGGTAAAGCTCATTTGATAAATTCCCTCTATGGAATAGGCTATACTATTCAAATCGCAATGTTGCCATATTTGTTGATAAGTTCTAATGCAGGCATAGAACACAATGGATATTTATTAACCTTATTTTCGCTTTTACAATTTACGGGATCCATTTTTTTTGGAAGAATGGCAGACATATGGGGTGTAAAAAAGTCCTTTTATTTATCTTTAATTTCCTCTTGCTTAATGTACCTAATGATCATGGTGTGCGAATCGACGTGGGCCTACTACATCAGCTTCTTACCATCCTTTTTTATGCAA…	MEVTSTLLEKGKNFAQDPSEVFPESKKFFFSSIGKAHLINSLYGIGYTIQIAMLPYLLISSNAGIEHNGYLLTLFSLLQFTGSIFFGRMADIWGVKKSFYLSLISSCLMYLMIMVCESTWAYYISFLPSFFMQTFQASSLLVCLKTNFDKRTGALGYLNLSYGMGIIFGSFLAGVMVNFVGSRGNLLIALLSQLIALCISTTLEEDPKLLKSSNVDKMKMSEILLSIKNEYIRVLNLFKKTYGICLLILFGLLPILMTKFAFAPVVVDMFKLTPSHTSYLMTYAGIITIIAEGILAPYLSSLLGDMICCKYSIPLTLTGFLLLSLCGANESLVLIFMSIPLCGGALLYICGTSQMTKRVEESELGSIIGLNTSLFYAVTIIAPYIAFKSYIALGLGLYW…	442	10	null	no	GO_0016021	GO_0016021	GO_0016021,GO_0016021	0	0	0	0	0	0	0	0	0	0	0	0	0	0	0	0	0	0	0	0	0	0	0	0	0	0	0	0	0	0	0	0	0	0	0	0	0
1200	PF3D7_0605900	long chain polyunsaturated fatty acid elongation enzyme, putative	null	ATGAATAATTTAAATATATTATTTTTCAATAACCTAGGAGAAAACATTTTAAAGTTCTTTAACCCCAGTTTAAAATATGCAAGAAGTATAACCAAGAATTGGTTTTTAATGAACCCTACTCATTTCTTTATAGCATTATTATCATATCTTATATTTGTATTTATATCATATATATATTATATTAAATATGGAAGTAAAAGTAGACATGATAAAACCCTAGCAGCAAAAATTGCACCCGCAATAACAAGAAGTCACAAAAGTACACCTCTAGAGCAGATGGTTGAAAAATTAACACCCTCCTACAATCTTTTACAAGTCTTATTCAGCTTAATTATCACATTGCTAACAGTATACGAAGCAAAGAATAGACGTTTTTCTTTATTTTACAATTCAGTTGAT…	MNNLNILFFNNLGENILKFFNPSLKYARSITKNWFLMNPTHFFIALLSYLIFVFISYIYYIKYGSKSRHDKTLAAKIAPAITRSHKSTPLEQMVEKLTPSYNLLQVLFSLIITLLTVYEAKNRRFSLFYNSVDFSKKNIALCCWLFYLNKLVDFVDTILIVLRKKWNQFTFLHVYHHLSVFLIMWVNTSVGYDGDIYYIIVVNSFVHFVMYLYYYLSSVKFKVPIFAKACVTYLQMLQFLSIILPGFYVLFVRHYCPYPRKLVGLSFYYCISLLILFGNFALHTYIKPKKKTS	293	7	null	no	GO_0016021	GO_0016021	GO_0016021,GO_0016021	0	0	0	0	0	0	0	0	0	0	0	0	0	0	0	0	0	0	0	0	0	0	0	0	0	0	0	0	0	0	0	0	0	0	0	0	0
3547	PF3D7_1219600	aminophospholipid-transporting P-ATPase	ATPase2	ATGTCCTTAGTTTATAGAAAAACACTGAACTTTTTAAAAGGAAAAAATGAAGATGATAAGGATGTTAAAATAAACATAAATGGGGAAAACAAAAGGACCTGTAACAATTCCGTGATAACGTCTAAATATACCGTTTTTAATTTCATATTTTTAAATATGTATGAACAATTTCATAAGATATCAAATGTGTACTTTTTTTTCATTGGTATATTACAAGTAATACCTCAATTTACTGCTACCAATGGAATTCCCACAGTTTTTTTTCCCCTTTTAATTGTGCTAACAGCAAATGCCATAAAAGATGCTTTTGAAGATTGGAATAGGCATAAAACCGATAAAATTGAAAATAATAGAATGTGTTATGGTATTGTAAGTGAAGAAGAAAAGAAAATATATCAA…	MSLVYRKTLNFLKGKNEDDKDVKININGENKRTCNNSVITSKYTVFNFIFLNMYEQFHKISNVYFFFIGILQVIPQFTATNGIPTVFFPLLIVLTANAIKDAFEDWNRHKTDKIENNRMCYGIVSEEEKKIYQEKSNKKNIFKKLKRYFFGNRKICNTENYYDEDDMCDDEITDINDYINNYEDNLENIEGTVKKRWKDIKAGDIILCRRSEFFCADILLLCTSHKNGIAFVETSSLDGETNLKVKEANTFLFNILGNDRNSAIDNVKNLKGFILSDKPNKDLSTMYGTIYFEKDKKIDVENIGIQELLKKTTEEIEYRKKRLSSVDLSKSSSAIGSNLCNNNNKSDSKSDIKNYNKDDDDFDDMDENNILKNDNYIRIPFDEKQFVLRGCKLKNTDWI…	1555	10	null	no	GO_0016021	GO_0016021	GO_0016021,GO_0016021	0	0	0	0	0	0	0	0	0	0	0	0	0	0	0	0	0	0	0	0	0	0	0	0	0	0	0	0	0	0	0	0	0	0	0	0	0
3582	PF3D7_1223400	phospholipid-transporting ATPase, putative	null	ATGGTTGATGATGAGGAGTTAAGAAAATTACGCTTTCTTCTGAGTAATAAAGGAGGAAGAATAAAGTATTTTTTTTCGTATATATTTTATAAACTGTTTAGTCACATATATAATAAGAAGAATAAGAAGAGAGAAAGATTTGTGAATATACATGGGAGGACTTTTCCAAATTTTTTTTGTGATAATAAGATAAAGAGTACTAAATATACCATATTAACATTTATACCATTATTTTTATTTTATCAGTTTGCTGACTTTTTAAATTTATTTTATTTATGTGTATCTTTGTTACAAATAATTCCTATATTTAACACAGGTTATGTATTTACTTTTGTAGCTCCATTATTATTTATTATCTTTATTAGTTTAATAAATGAAGTAGTAGATGATTTAAAAAGA…	MVDDEELRKLRFLLSNKGGRIKYFFSYIFYKLFSHIYNKKNKKRERFVNIHGRTFPNFFCDNKIKSTKYTILTFIPLFLFYQFADFLNLFYLCVSLLQIIPIFNTGYVFTFVAPLLFIIFISLINEVVDDLKRFIKDLENNNEIYYSLLENGNFQKIYSKDIRVGDIILIKSKQRVPADCILLRNLNKNEESNFKVEEKRLFNCFRWNKSNNVYNKINKSYYHFNKNIDNELIDDRYNESNNNCSETSNNLLFSENEKSQKKGKKKQKKKLMLGDNNTNMNDFNFNPNDQNNNMSNQLKKKKKRKKKNNKSKKNININETTNETANYTYVKTDKIDGETDWKIKYPINIFQNLKRLKDFFTIDILFILEQPKNDIYKIEGSFVIFKYNPYGDFKTTENN…	1618	10	null	no	GO_0016021	GO_0016021	GO_0016021,GO_0016021	0	0	0	0	0	0	0	0	0	0	0	0	0	0	0	0	0	0	0	0	0	0	0	0	0	0	0	0	0	0	0	0	0	0	0	0	0
3918	PF3D7_1303500	sodium/hydrogen exchanger, Na+, H+ antiporter	NHE	ATGATTTATGTAGCAACACTCAGCTCAGATTATGAAAGTCGAAAGAAGGAAGATAATATAAAAGGGAGGAGAAAATTATGGCGAATAAGTATATTTAAAATAATATTGATTATATTATTTTTATGTTTATTTAAAAAGAATGATGTTTTAATTTTGAAAGACGAATGTTTTGACGAGTATAATAATAGTAGTAGCATATGGGTAGCTCCTTTTGTTAGTATGAAAGATTTTGTTAAAAGAAAATGTGGGAATTATATATATATGTATATTTTTGATATGAAAAAAGATGGGATTGTAAATATAGAAAGTACATTTTTGGAGACACTTCATAATAATAATAATAATTATTATTATAATGATATTGATTTGAATCGTATGAAATATATGTATCATGACACA…	MIYVATLSSDYESRKKEDNIKGRRKLWRISIFKIILIILFLCLFKKNDVLILKDECFDEYNNSSSIWVAPFVSMKDFVKRKCGNYIYMYIFDMKKDGIVNIESTFLETLHNNNNNYYYNDIDLNRMKYMYHDTCFISNKRNNLKRNNFCNIANIKDFDCSCGEKKRYRILQEVKKKDSRRKRGDKKRNEEYKDDSDDNSDDNSDDNSDDNFYDDDGDDDDDGNKNQMPTASNEVSEGIVFFCFIFISATMLQFILSKIHKFNIPVSVIWFLYGMCTYVIAKNFNMFEENTLHKSIINARNIDSSVLYFVLLPILLYEATQDINYYAFKNFLYGGIGLAVVGVALQVGILGILFYYTFMYRQEQSPLSSSFLLASILSSTDPVAVLSILNVVDAPSKISS…	1920	14	null	no	GO_0016021	GO_0016021	GO_0016021,GO_0016021	0	0	0	0	0	0	0	0	0	0	0	0	0	0	0	0	0	0	0	0	0	0	0	0	0	0	0	0	0	0	0	0	0	0	0	0	0
1176	PF3D7_0603500	cation/H+ antiporter	CAX	ATGGTTATGGGTAGAGTTCGTGCGACGTCTTATGTAAGGCGTACAATTTCACAACCGTTAAATAAAAATGTGCCCCCTATGAAAAATATGAAAAATGTAAACGGACTTAAGGATACCAATTTAATACGAAATAGAAATTTACATTTACAATTATTATGTAATAACAAAATGCCAGCAGGTATGTATGATGATGAATTAACAAAAGTGTATGATTTAGAAGAAACGTTACCTTTTTATTATCCTAGAAAATCAGATATTTATGGAATGCAAAATATGTTAAATAGTAAGTTAAATGTTTTATTAATATTTGTACCTATAGGATTATTAAGTCATTTCTTTGGTTTTAAAGATATATATATATTTTTTTTTAATTTTATGGTATTAATACCCTTATCTGCT…	MVMGRVRATSYVRRTISQPLNKNVPPMKNMKNVNGLKDTNLIRNRNLHLQLLCNNKMPAGMYDDELTKVYDLEETLPFYYPRKSDIYGMQNMLNSKLNVLLIFVPIGLLSHFFGFKDIYIFFFNFMVLIPLSALMGHVTEDLALHTGEIIGGLLNATFGNLMEMIFSIQALNAGLINVVQGTLLGSILSNLLLVLGMSFFAGGLYHHIQKFNEKGATCSTSLLLLSSLAITIPTVSSFTTNNNLDVILKVSRITAVLIFVTYCLFLLFQLYTHISLFQDKEMTEEIPQLSVISGSIFLILITLLVSIHSEFLIYSIDSVIKYYNISENFIGVILLPVVGNATEHLTAVTVAMKNKVDLTMGVAVGSSAQIALFVVPVTVLFGWILNKPMTLAFSPLSTV…	441	11	null	no	GO_0016021	GO_0016021, GO_0005739	GO_0016021,GO_0016021,GO_0005739	0	0	0	0	0	0	0	0	0	0	0	0	0	0	0	0	0	0	0	0	0	0	0	0	0	0	0	0	0	0	0	0	0	1	0	0	0
5107	PF3D7_1453500	NAD(P) transhydrogenase, putative	NNT	ATGTATAGAAATATATTTGCCTCTATTATTTTATGCCTTTTATTATTTTTGAGTAGCAATTGTTATGGTAAATCAAATTTGAGGAATTATATAAATGGTTTTAATGAATTCATAGAGGATGATAAAAATTCAAATTTTGAAATAAAATTACCTGTTATTAATTTCCCCGTATCTTCCAATGATATAACAAATGATTATAAGAATGAGGAAAAGGCATCAAGAGATAATTTGTTGAATAATGAAGAGATAGAACCTTCTACATATTATTCAGTATTACCATCATTATTAAATGCTGTTTATTTATTTTCATCTATATGTTTTATTCTTTGCTTAACTGGATTAAATGCTCATAGAACATCTAAAAGAGGTAATATACTTGGTTTTATTGGAATTGTAGCA…	MYRNIFASIILCLLLFLSSNCYGKSNLRNYINGFNEFIEDDKNSNFEIKLPVINFPVSSNDITNDYKNEEKASRDNLLNNEEIEPSTYYSVLPSLLNAVYLFSSICFILCLTGLNAHRTSKRGNILGFIGIVAAIMITFSQVGFGFRYKLFLLIVIPAITIGIYIAHNVSMVQMPQLVALFHSFVGLAALFVGFSKYHSESFENYEISTIHLLELYVGTFIASIAFIGSLVAAGKLSGILDSKSLKLQIKKIINILCIVLIIILGYYFVTLKLLYLKSICLYISLIIDSFLGFHLIASIGAADMPVIISVLNSYSGFATAISGFLLHNNLLIISGALIGSSGAILSYIMCIGMNRDIFNIILGGWDDYENMGESIYDQNFIEKKNKQTINSTTNKYVAE…	1176	12	HMM: MYRNIFASIILCLLLFLSSNCYGK, NN: MYRNIFASIILCLLLFLSSNCYGK	yes	GO_0016021	GO_0016021, GO_0005739	GO_0016021,GO_0016021,GO_0005739	0	0	0	0	0	0	0	0	0	0	0	0	0	0	0	0	0	0	0	0	0	0	0	0	0	0	0	0	0	0	0	0	0	1	0	0	0
3025	PF3D7_1116600	dolichyl-diphosphooligosaccharide--protein glycosyltransferase subunit STT3, putative	STT3	ATGGTTAAGGATGAAAATATGCGAGATGAGCTGGAAGAAGAGATTGATAATTTAAGAGCTCGTTTTTTTGTAAATCGTCTTTTTGAGAGGGTATTTTGTAGTCATTATTTAAGGAAGGTAATGATAAGAAGCAAATGGATGAGATACAGAATGGAAGTGTTTATATTACTTCTAATAGGTGTGTTAAGTTTTATTATAAGATTATTTTCAGTAATACGTAATGAGGCTATAATACATGAATATGATCCTTATTTTAATTATAAATTAACAAATATTTTAAAAGAAGAAGATTTTTATAAATTTTGGAATTATTTCGATGAAAAGTCATGGTATCCATTAGGTAGAACAACTGGGCAAACATTATTTCCAGGATTAATGATTACTAGTTTTTTATTTTAT…	MVKDENMRDELEEEIDNLRARFFVNRLFERVFCSHYLRKVMIRSKWMRYRMEVFILLLIGVLSFIIRLFSVIRNEAIIHEYDPYFNYKLTNILKEEDFYKFWNYFDEKSWYPLGRTTGQTLFPGLMITSFLFYKICHFFGILVSMRNICIYIGPIFSFFTCIISYFLTREIYNFSGAALLSALFVSISPSHISRTVAGSYDNESISIFLLLLCIYNWIRCLKKGSLLSVLICSLSTYYMALSWGAYIFITNSISLFMLIIIILKKYTIKHFIIYNVYYILTTILCLNIPCIHRSVFISIEHLATHSIYILSTFMMFLHFIMKHFHLNEIYIKHKFIQLSFIFFIIIFKYFIFTDKLSWNHRSRTLLDPTYASKHNPIVASISEHQPTTWSSYFFDIHLI…	856	13	null	no	GO_0016020	GO_0016021, GO_0005887, GO_0008250	GO_0016020,GO_0016021,GO_0005887,GO_0008250	0	0	0	0	0	0	0	0	0	0	0	0	0	0	0	0	0	0	0	0	0	0	0	0	0	0	0	0	0	0	0	0	0	0	0	0	0
2835	PF3D7_1037000	DNA polymerase zeta catalytic subunit, putative	null	ATGAATTTAGCTGAAAAACCAAAAGCTTTTTTTATTTGCAAATTTTTATTTTTTTATTATATTTATAAAAAACCCATCTTACCTTTTGATTCTTTGAAATGTAAAATTAGTGGTAAAGAGATACCCTATGTTTGTATTATTCAAATATTAGGTCTAAGTCTTTTAGGCCAACGTGTGTGCTTGTATATACACGACTTTTATCCTTTCTTTTATTTATTAATACCACCTGAGGAAAAGCAAAATGATAAGCTAGAAATAGAATTGTGCTCATTTTTGGAGGAAGAATATGGAAAAGCACGAAAAGATCCAAGTAATAATGTGTGTGTTTATAATATAGAAAGAGTTAAAAGGAAAGGGATTTATGGGTATAATGAAGAGTGCGATGATTTTTTGAAAATA…	MNLAEKPKAFFICKFLFFYYIYKKPILPFDSLKCKISGKEIPYVCIIQILGLSLLGQRVCLYIHDFYPFFYLLIPPEEKQNDKLEIELCSFLEEEYGKARKDPSNNVCVYNIERVKRKGIYGYNEECDDFLKISFLYPNTINYFASLLKKKLFKKRIWDLYEVHINYMLHFLCMKNIYGCSEIYIDKNIYFRKEFVNEINFECIEKEERWYLGEKKYNLDNFKRNKYLEVDAPLVFTIKTINVNFSSLKRETTYDIECDIKHQHILNEKIYTYEFEKNKIKWKKEFNFDLPINHLDSFAKMWMKEKKRCKYMDMDLKRELFYFKSYENDLCFDTFDVLTERTKKMFQGFLEFMKRMQSEKDKVNYEQILEYDNIENVKKYNKVINDDMKLKEDHNFNSD…	2226	0	null	no	GO_0016020	GO_0016035	GO_0016020,GO_0016035	0	0	0	0	0	0	0	0	0	0	0	0	0	0	0	0	0	0	0	0	0	0	0	0	0	0	0	0	0	0	0	0	0	0	0	0	0
4088	PF3D7_1320400	type I signal peptidase	SPB	ATGAATTTGCTTATATACAGCTGTTTTAACAAAAGTATTTGCTTTTTTTTAAGAAGAGACTTATATTTGAAAAAAAAGAATTGTACTAAAGTAAGTTTTTTTAATTATTTTAATTCGAAAGAATGGAATAGATACGAGAAAAGGATACGAAAAAAAAGTATAATATTACAAAATGATGCAATATCAAATAAATTTTATATAAAAAATAAAATTTTTTGTAATAAAAATGTATTACTACTACCTTTGGAATATAAAAACAATAAACAATTTCAAAATTGTACTATAAAAATATGGAAGAGGAATAAAAATGGTTATCATATTGGACTAAGGAACAAAAAAGGAAGCAAAAAAAATAACAATAATAATAATAATAATAATAATAAAAGAAAAAAAATAAAT…	MNLLIYSCFNKSICFFLRRDLYLKKKNCTKVSFFNYFNSKEWNRYEKRIRKKSIILQNDAISNKFYIKNKIFCNKNVLLLPLEYKNNKQFQNCTIKIWKRNKNGYHIGLRNKKGSKKNNNNNNNNNNKRKKINFFSHVEPIKDFLKFTKKIVLCCFVIYGINNYIFDMTLTSGSSMYPLINQNGVILFYVCDYSLRWFNNLKKIYLSIYMNILYKCYNILQLHFDYEYTSYLYEIIYNKINKLKNKIKKCRHIYKRGDVVLLVSPVNEKKRVCKRIIAIENDKLFIDNFHSYVEIPPNNIWVEGDNQMDSYDSRNYGSVHVQLIIGKVFFLLDPFKEFAFVNSERNYKPDLRRYLHISN	359	0	null	no	GO_0016021, GO_0016020	GO_0016234	GO_0016021,GO_0016020,GO_0016234	0	0	0	0	0	0	0	0	0	0	0	0	0	0	0	0	0	0	0	0	0	0	0	0	0	0	0	0	0	0	0	0	0	0	0	0	0
1627	PF3D7_0718500	prefoldin subunit 3, putative	null	ATGTCATTTGACGATTTAACTGATAATACCAAATCTGTAAGGAACATTCCAGGAGCGAAATTTATAGAACATGTCACAGAATTTTTACAAAATAAAAATGAGGAAAGTATACTCCGCCTAGCAAGAGAACTTTTATTGAAATATAAATTTATGGAACATGCCTTTGTAAGTAGACAAATTAACACTCAAAAAAAAATTCCAGAATTAAAAGATGCCTTAAGAGTTGTGCAATTACTTGAAAAAAGAAAGAAAATAAAAGAAAAAAAAAATTTAGAAACGTTTTTCCCCGTGGAAGAATCTTTGTATGCTAGGGGAATCGTCCAAAAAACTGACAAAATATTGTTATGGCTAGGGGCTAACGTAATGGTTGAGTTTCCCTTTGATGAAGCTACAGATCTT…	MSFDDLTDNTKSVRNIPGAKFIEHVTEFLQNKNEESILRLARELLLKYKFMEHAFVSRQINTQKKIPELKDALRVVQLLEKRKKIKEKKNLETFFPVEESLYARGIVQKTDKILLWLGANVMVEFPFDEATDLLNQHLERAINLSQEMDNELLWLHEQITTTEINISRIHNYIELKKGMMGKEVDKKTEQVN	192	0	null	no	GO_0016272	GO_0016272	GO_0016272,GO_0016272	0	0	0	0	0	0	0	0	0	0	0	0	0	0	0	0	0	0	0	0	0	0	0	0	0	0	0	0	0	0	0	0	0	0	0	0	0
4175	PF3D7_1329100	myosin F, putative	MyoF	ATGGAAGGTGCAAATAAATGTGTCATAGGAACAAAGATATTTATCAGAGACAAAAATAAAGTTTGGGCTAGTGCTGAAATTATAAATGAAGATGAAGATAACATTATAGTAAAAACTGAAGATGATGATATAATAAAATTAAAAGAAACGGATGAATTTTATCTTCGAAATTTAGACTTATTTGATTCGAGTGGTTTGTCTGCTCCTTCAGATTTAACAAAATTGACACACTTGCATGAGGCATCCATATTACATAGTTTGAATCTTCGTTTTGATATCGATGAAATATATACATTTACAGGTCCAATATTAATCGCTGTGAATCCTTTTAAAATAATAAAAGATTTATATTCTGATAACATGCTTGCTAAACATGTTCAACCTATAAAATCTAAAAGT…	MEGANKCVIGTKIFIRDKNKVWASAEIINEDEDNIIVKTEDDDIIKLKETDEFYLRNLDLFDSSGLSAPSDLTKLTHLHEASILHSLNLRFDIDEIYTFTGPILIAVNPFKIIKDLYSDNMLAKHVQPIKSKSPHIFATSNSAYLGMCNNNKSQTILISGESGAGKTESTKYVMKFLACAGSDIKKRSLIESQVLESNPLLEAFGNARTLRNNNSSRFGKYIELQFSVDHKNYIKGKLCGAKILTYLLEKVRVCDQQEGERNYHIFYQLCKAVKEANIVDNSIMSNNENDDVENYVNYKCDEDKNKDHIENNICEEPTQKKKKWYHFPSTSKFRNLENVEPMKIDFTDFKEHVHFRYLTKSSVYELNEVNELEEFESTVHAMQTIGISNTEQYQIFKIL…	2160	0	null	no	GO_0005622, GO_0016459	GO_0016459	GO_0005622,GO_0016459,GO_0016459	0	0	0	0	0	0	0	0	0	0	0	0	0	0	0	0	0	0	0	1	0	0	0	0	0	0	0	0	0	0	0	0	0	0	0	0	0
1282	PF3D7_0613900	myosin E, putative	myoE	ATGATAAACCCTGAAGAACAACAGTTCAAGGAAGGGGATCTGGTGTGGTGCAATAAAATTCCGTCCACATGTGAAGAGGAAGATGTTTTATATATTTTATGTCGTATAATAGAAAAAAAAAGTGAGGATCACATAATATTAACAAAATATGACAATGAGACAAATGGTTCTACGTTTGTGTGTGAATCAAAACATTTATACAATGCTAATAACAATAATCCATTTTCATTAGATGAAGATGATATGATTAAATTAAAACATTTTAATGAACCTACAGTATTGTATCATTTGCATGGGAGATATGAGAAAAATATATTTTTTACAAAGATGGGACCATTATTAATTTATGTGAATCCTATGGAAAAAGAAAAAAATTATGAGAATAACACATTAAATAAA…	MINPEEQQFKEGDLVWCNKIPSTCEEEDVLYILCRIIEKKSEDHIILTKYDNETNGSTFVCESKHLYNANNNNPFSLDEDDMIKLKHFNEPTVLYHLHGRYEKNIFFTKMGPLLIYVNPMEKEKNYENNTLNKINNINDICNDVIEKYKYSHSSDDIKLNEYHVGMSALKYMNVLKKNQSIIITGESGSGKSKIFNSLLNFFSNERIFPLKKKFEIRNDDNINISEILKHGNIIMEALGNAKTSKNNNCNRYAKYCILQMDKDKIKHIYMKKFLFDKERLINRRSDENNFHIFYYILNGSSENFKKKYFLKNLEDYNIFKNDSIRDNSNDEQNFIQLLTSLNILFDDDKKQIDFFFSILSAILLLGNIQMIKSPKKSLFRQNFICEFPSNYKQLQEQLE…	2153	0	null	no	GO_0016459	GO_0016459	GO_0016459,GO_0016459	0	0	0	0	0	0	0	0	0	0	0	0	0	0	0	0	0	0	0	0	0	0	0	0	0	0	0	0	0	0	0	0	0	0	0	0	0
3264	PF3D7_1140500	myosin K, putative	MyoK	ATGTATAAACAAAAATCCTTAGAATCAAGAGATATAAATTACATATATGAGGATTCTTTCGTTTGGGTACATATTAATTCTATTAAAAAGAAAAACAGTTTATTATATCGAGAGATTTATGAATATTATAAACATCGAAATAGTTCTTTTTGTTTTTTTAAAGGGAGCGTGAAAAGATTTGTTTCTAAAAATGAAGTAGAAATATATATATTTATAGATGATAATTATAATACATCGAAAGATGACTTTAATTATAATATAATAGAAAATGTAAAATATTTATTACCTATAGATACCAATTTTGGTTGTAGTGATAACACACAATTAATATATTTGAATTCACCAAATTTGTTAGAAAATATTTATCAAAGATATAATAAAGCATATATAAATAAAGAA…	MYKQKSLESRDINYIYEDSFVWVHINSIKKKNSLLYREIYEYYKHRNSSFCFFKGSVKRFVSKNEVEIYIFIDDNYNTSKDDFNYNIIENVKYLLPIDTNFGCSDNTQLIYLNSPNLLENIYQRYNKAYINKENRNCIYTYIGYILLSVNPYENFDIYDESYMKRIKDRNDLFAIPHPFSIANDAYNCLLEDKISQSIIISGESGAGKTESSKQVLKYLTYLSYFQKGYKKKKKKMIPNECDKIEIDNMKYVDNNLKYMDDTLLYNYKRCGYTTSDNNSPQEENDTIKKAKKNYDYDKHSYSDNNDNIKNNIDKKKKKKNNSKKNISNINLKSDDYTNIINTYSSSTYEEKIQNSNPLLECFGNAKTIKNDNSSRFGKLMKLNYNEKGILCSASIETYL…	1738	0	null	no	GO_0016459	GO_0016459	GO_0016459,GO_0016459	0	0	0	0	0	0	0	0	0	0	0	0	0	0	0	0	0	0	0	0	0	0	0	0	0	0	0	0	0	0	0	0	0	0	0	0	0
3645	PF3D7_1229800	myosin J, putative	MyoJ	ATGGCTTTTCTACAATTTAAGAGCAATGAAACGTTATATTTTTCCAACATATCAAATGCTAAAGATGAACAATCAAAAGTATTGAGCACTTCTCATCCAAACGATGACCAACATAAGATTTTGAAAAAACCTAGAGAAGGAGGAGATATATATTCTGATGTTTATGTATGGTACTTTCTCAAAAATGTATACAAAAAAATGGAAATTTGTTCTTTTAATAAAATGGATAATACCTATACTTTAAGAAGAAAAGGGATAACATATGAGAATGTGCCTGCTGATAAAACAAAACCATACTTAAAAGATTTAGATGAAATAGATAGCGAAAACAATATAGATATTATACAGTTAAATGAAGAGAATGTATTACAAAATATAAAAAACAGATATAAGAAAAAC…	MAFLQFKSNETLYFSNISNAKDEQSKVLSTSHPNDDQHKILKKPREGGDIYSDVYVWYFLKNVYKKMEICSFNKMDNTYTLRRKGITYENVPADKTKPYLKDLDEIDSENNIDIIQLNEENVLQNIKNRYKKNKIYTFHASLLLVVNPYKEIKGLYDIYQMNIYLKKLTNDHMSNEQHMKAHIYDISNMAYKNMIQKKKRQTIVVSGHSGSGKTENCKFLFKYFHYIFFHKNGGTHNDNNNDNNNNNDDNNNDNNNNDDNNNDNNNNNNNIYSVNNNIYNNLCTNIYTSLKGEPDNNVEKQNYFGLLGSYRKVRDTTNDDVKDMNGRDKIYNDSLHNERIDKLIYINNIIESMSNARTIKNNNSSRCGRINDLIFEERENTQKGESNNMFNYCFNNIKI…	2274	0	null	no	GO_0016459	GO_0016459	GO_0016459,GO_0016459	0	0	0	0	0	0	0	0	0	0	0	0	0	0	0	0	0	0	0	0	0	0	0	0	0	0	0	0	0	0	0	0	0	0	0	0	0
4418	PF3D7_1354400	V-type proton ATPase 21 kDa proteolipid subunit, putative	null	ATGTATAATTCATGGTTTGAAATAGTGCGATCCATATCGCCATATAACTGGGCAATGTTAGGCATAGCCCTTTCATTATTTCTATCTATTATGGGTGCAGCATGGGGTATATTTATATGTGGTACAAGTATTGTTGGAGCTTCGGTTAAATCACCACGTATTATTTCAAAAAATTTAATATCAATTATTTTCTGTGAAGCATTAGGTATGTATGGTGTTATTACGGCAGTATTTTTGCAAATAAAATTTAGCGGGTTATCTACAGAGGTACACCCACCATTAGTATTAACAAATAAAACAGATCCTTTAATTATGAATACAATAAGAGGAGGATGGGCATTATTTGCTAGTGGTCTCACTGCAGGATTGTCTAACCTTGTTTCAGGAGTTTCTGTTGGA…	MYNSWFEIVRSISPYNWAMLGIALSLFLSIMGAAWGIFICGTSIVGASVKSPRIISKNLISIIFCEALGMYGVITAVFLQIKFSGLSTEVHPPLVLTNKTDPLIMNTIRGGWALFASGLTAGLSNLVSGVSVGITGSSCAIGDAHSSDLFVRMLMIEICASVIGLYGLIVAIVSIGDIQLT	181	4	HMM: MYNSWFEIVRSISPYNWAMLGIALSLFLSIMGAAWGI, NN: MYNSWFEIVRSISPYNWAMLGIALSLFLSIMGAAWGI	yes	GO_0033179, GO_0033177	GO_0016471	GO_0033179,GO_0033177,GO_0016471	0	0	0	0	0	0	0	0	0	0	0	0	0	0	0	0	0	0	0	0	0	0	0	0	0	0	0	0	0	0	0	0	0	0	0	0	0
256	PF3D7_0212300	peptide chain release factor subunit 1, putative	null	ATGGAAGACCACGATGCTAATGTAGAACAATGGAAAATAAAAAGATTAATAAAGAAACTTGAGAATGCAAAAGGAAATGGAACCAGTATGATTAGTTTGATAATTAAAAACAAAGATGAAGTTTCAAGAATTAACAAAATGCTTGCTGATGAATTGGGAACTGCTTCAAATATAAAAAGCAGAGTTAATAGACTTAGTGTTTTGTCTGCCATTACCTCAACACAGCAAAAGCTAAAGCTGTATAACAAGACGCCCCCCAAAGGTCTAGTTGTTTATTGTGGAACAGTGATCACAGAAGATGGAAAGGAAAAGAAAATGTCCATTGATTTTGAACCATTCAGGCCAATAAATACGAGTTTATATTTATGTGACAATAAGTTTCACGTAGAGGCATTAAAA…	MEDHDANVEQWKIKRLIKKLENAKGNGTSMISLIIKNKDEVSRINKMLADELGTASNIKSRVNRLSVLSAITSTQQKLKLYNKTPPKGLVVYCGTVITEDGKEKKMSIDFEPFRPINTSLYLCDNKFHVEALKELLESDDKFGFIIVDGNGALFGTIQGNTREVIRRFTVDLPKKHGRGGQSALRFARLRLEKRHNYVRKVAEVATSVFITNDKVNVTGIVLAGSADFKNDLLNSDMFDQRLFAKVIKIVDISYGGDNGFNQAIELSSEALQNVKFIQEKKLIGKFFEEIAQDTGKVVYGIDDTLKALEIGAVELLILYEGLDIIRLTTKNPVTNQTKTMHISPCDEKQESLYKENNVELEVVEKISLTDWVIGNYKKYGASLDFVTNKSQEGAQFQKG…	427	0	null	no	GO_0005737	GO_0018444	GO_0005737,GO_0018444	0	0	0	0	0	0	0	0	0	0	0	0	0	0	0	0	0	0	0	0	0	0	0	0	0	0	0	0	0	0	0	0	1	0	0	0	0
1863	PF3D7_0811000	cullin-1, putative	CUL1	ATGGACATTGTAAATATAAACTTTGAAAGTGGATGGAAGATAATAAGGGAAGAGGCTATTGAGAAAATTGAGAAATATTTAGAGAATGAACATATTGAGAAAAACAAGAACTTATTTAGTGCTACAGAATATACAAGACTGTATACAGTAGTATATAATATGTGTGCTAAGAAAAATCCCTTTTGTTATTCTAAAGAAGTTTATAGAAAGTATGGAGAGAGTTTATCCATGTATACTATAGATAAAATAAAACCATTATTAAAAAATAGTGATGAATTAAATAAAACGAAAATATTAATTGATGCTTGGTTTAAATATTCTTTTTATACGAAATGGATGAATAAATTTTTAAGATATTTAGATCGTTATTATGTAGAATATAATAGTTCTTTATGTCTT…	MDIVNINFESGWKIIREEAIEKIEKYLENEHIEKNKNLFSATEYTRLYTVVYNMCAKKNPFCYSKEVYRKYGESLSMYTIDKIKPLLKNSDELNKTKILIDAWFKYSFYTKWMNKFLRYLDRYYVEYNSSLCLSAYTKNIFKITLFNELREDIKNIIYEIYNNLRLQEEIDQKELFCNIVELYKELDNESNEKMYEHDIEKKIVENVNNFYKKKAEEWINDYPFDDYIISIENAIEKEYEKNKSLNLNDDTCEKVTNIIVKILIYEKLNTLIDNKNNIFHLLKNNNLSSLRRTYILFSYFPEALTGLKKIIGEYIKMEGNELKDKYVQLSRKMHMSKNVNNMQNVDDNTMEDNDNYIDISNDDNNNNDNSNNNNIMNTEQNDDIILCDYIEQLIKLHNH…	829	0	null	no	GO_0031461	GO_0019005	GO_0031461,GO_0019005	0	0	0	0	0	0	0	0	0	0	0	0	0	0	0	0	0	0	0	0	0	0	0	0	0	0	0	0	0	0	0	0	0	0	0	0	0
1710	PF3D7_0727400	proteasome subunit alpha type-5, putative	null	ATGTTTTCAACAAGGAGTGAATATGATAGGGGAGTAAATACCTTTTCTCCTGAAGGACGACTTTTTCAAGTTGAATATGCCTTAGGGGCGATAAAACTTGGTAGTACGGCTGTAGGTATTTGTGTGAACGATGGAGTGATATTAGCATCCGAGAGAAGAATTTCCTCAACACTTATCGAAAAAGATTCCGTTGAGAAATTATTATCGATAGATGATCATATTGGTTGTGCGATGAGTGGTTTGATGGCTGATGCAAGAACATTAATTGATTATGCAAGAGTCGAGTGTAATCATTATAAATTTATTTATAATGAGAATATAAATATAAAGTCATGTGTAGAACTAATATCTGAATTAGCTTTAGATTTTTCTAATTTGTCTGATAGTAAAAGAAAAAAG…	MFSTRSEYDRGVNTFSPEGRLFQVEYALGAIKLGSTAVGICVNDGVILASERRISSTLIEKDSVEKLLSIDDHIGCAMSGLMADARTLIDYARVECNHYKFIYNENINIKSCVELISELALDFSNLSDSKRKKIMSRPFGVALLIGGVDKNGPCLWYTEPSGTNTRFSAASIGSAQEGAELLLQENYKKDMTFEQAEILALTVLRQVMEDKLSTSNVEICAIKKSDQTFYKYNTDDISRIIDVLPSPVYPTIDMTA	256	0	null	no	GO_0005839, GO_0019773	GO_0019773	GO_0005839,GO_0019773,GO_0019773	0	0	0	0	0	0	0	0	0	0	0	0	0	0	0	0	0	0	0	0	0	0	0	0	0	0	0	0	0	0	0	0	0	0	0	0	0
72	PF3D7_0108000	proteasome subunit beta type-3, putative	null	ATGGGGTCTATATATAATTATAATGGTGGTTGCGTTTTAGGAATGAGTGGATCAAATTGTGTCGCGATAGCATGTGATTTGAGATTAGGAGCAAATACATTTACAACCGTTAGTACAAAATTTAGTAAGATTTTCAAGATGAATAATAATGTATATGTAGGATTAAGTGGATTAGCTACTGATATACAAACGTTATATGAAATATTAAGATATCGTGTTAATTTATATGAAGTTAGGCAAGATGCAGAAATGGATGTTGAATGTTTTGCAAATATGTTATCGAGCATACTATATTCTAATAGATTCTCTCCTTATTTTGTTAATCCTATAGTTGTTGGATTTAAACTTAAACATTATGTAGATGAAGAAGGAGAAAAGAAAGTTAATTATGAACCTTAT…	MGSIYNYNGGCVLGMSGSNCVAIACDLRLGANTFTTVSTKFSKIFKMNNNVYVGLSGLATDIQTLYEILRYRVNLYEVRQDAEMDVECFANMLSSILYSNRFSPYFVNPIVVGFKLKHYVDEEGEKKVNYEPYLTAYDLIGAKCETRDFVVNGVTSEQLFGMCESLYVKDQDENGLFETISQCLLSALDRDCISGWGAEVLVLTPEKIIKKKLKARMD	218	0	null	no	GO_0005839	GO_0019774	GO_0005839,GO_0019774	0	0	0	0	0	0	0	0	0	0	0	0	0	0	0	0	0	0	0	0	0	0	0	0	0	0	0	0	0	0	0	0	0	0	0	0	0
5	PF3D7_0100600	rifin	RIF	ATGAAACTGCACTACACTAAATTATTATTATTTTTCTTTACATTAAATATATTGTTAACATCATATCATGCACATAATAAAAATAAACCATCCATCACACCACATCATACACGAAGTACTACGTCACGATTGTTAAGCGAATATGACACAGAATCGTCAATTTATGATAGTGATGATGAAATCGATTCAGTGAAGGAAATTTTCGAACGACAAGCCTCACAAAGATTACGAGAATATGACGAAAGGTTGCAAGAAAAACGACAAAAACGCAAAGAACAACGTGACAAAAATATACAAAAAATTATTCATAAAGATAAAATGGAGAAAAACTTAGCAGAAAAAATAGAAAAAGGTTGTCTTAGGTGTGGATGTGGGCTAGGAAGTGTTGCAGGAAGTATT…	MKLHYTKLLLFFFTLNILLTSYHAHNKNKPSITPHHTRSTTSRLLSEYDTESSIYDSDDEIDSVKEIFERQASQRLREYDERLQEKRQKRKEQRDKNIQKIIHKDKMEKNLAEKIEKGCLRCGCGLGSVAGSIGLFGAVAINIWKPAALDAAITAALNANAVKIAAAANAAGEVIGKALVIAELQKMGISTLKGQTLKSFFRTISYKNVSSITKAVYGQHYEICVYDPSRNLLSSFGDVNRHIGICNSVWKQISAVSQRGQYISHEEVIKRTVETMMSEAEVSAKAAAKTAEAANKLAIEEAQEQVMEATIYNWYTTIGYTILAILIIVLIMIIIYLILRYRRKKKMKKKAQYTKLLNE	359	1	HMM: MKLHYTKLLLFFFTLNILLTSYHAH, NN: MKLHYTKLLLFFFTLNILLTSYHAH	yes	GO_0016020	GO_0020002	GO_0016020,GO_0020002	0	0	0	0	0	0	0	0	0	0	0	0	0	0	0	0	0	0	0	0	0	0	0	0	0	0	0	0	0	0	0	0	0	0	0	0	0
15	PF3D7_0101900	rifin	RIF	ATGAAACTGCATTACTCTAAAATATTATTATTTTCCCTACCATTAAATATATTGGTAACATCATCATATGCCCATAATAAAAATAAACCATCCATCACACCTCATCATACACCAATTACTACATCACGAGTATTAAGCGAATGTGACCTATATATGCCTAAATATGATAATGATGCGGATATGAAATCAGTGAAGGGAACTTTCGATCGACAAGCGTCGCAACGTTTTGAAGAATACGAAGAACGTATTAAAGATAAACGCCAAAAACGTAAAGAAGAACGTGACAAAAATATACAAGAAATTATTGAAAAAGATAGGAAGGACAAATCATTTGCAGAAAAAGTAGAAAAAGGTTGTCTTAGGTGTGGGTGTGGGCTAGGAGGTGTTGCAGCAAGTATT…	MKLHYSKILLFSLPLNILVTSSYAHNKNKPSITPHHTPITTSRVLSECDLYMPKYDNDADMKSVKGTFDRQASQRFEEYEERIKDKRQKRKEERDKNIQEIIEKDRKDKSFAEKVEKGCLRCGCGLGGVAASIGLFGGLGIYAWRSAALVTAIQKGIEASVEAGEAAGTKAGKEFVIAALQKMGIFTVGDQRLVSYFSTTDYTSALKISSDIIQKYDPSSCFFDFSGARETFCTWVKVKSDAAVNVERSTVSTNALVEKAVGTIVTDAKTVVERAVETATDEAIQRSIGVVDAKYAICQTAIIASVVAILVIVLVMMIIYLILRYRRKKKMKKKDQYTKLLNE	343	1	HMM: MKLHYSKILLFSLPLNILVTSSYAH, NN: MKLHYSKILLFSLPLNILVTSSYAH	yes	GO_0016020	GO_0020002	GO_0016020,GO_0020002	0	0	0	0	0	0	0	0	0	0	0	0	0	0	0	0	0	0	0	0	0	0	0	0	0	0	0	0	0	0	0	0	0	0	0	0	0
127	PF3D7_0114700	rifin	RIF	ATGAAACTGCACTACTCTAAAATATTATTGTTTCTTATTCCATTAAATACATTAGTAACATCATCATCATATGTGCATAATAAAAATAAACCATACATCACACCACGTCATACACCAATATGTACATCACGTGTGTTAAGCGAATGTGACAAACAATCGTCAATTTATGATAATGATGCGGATATGAAATCAGTGAAGGAAAATTTCGAACGACAAACCACACAACGATTACGCGAATATGATGAACGTATGAAAGATAAACGCAAAAAACGTAAAGAAGAACGTAATAAAAATATACAAAAAATTATTGACAAAGATAAAATGGAAAAATCATTAGCAGAAAAAGTAGAAATAGGTTGTCTTAGGTGTGGGTGTGGGTTAGGAGGTGTTGCAGCAAGT…	MKLHYSKILLFLIPLNTLVTSSSYVHNKNKPYITPRHTPICTSRVLSECDKQSSIYDNDADMKSVKENFERQTTQRLREYDERMKDKRKKRKEERNKNIQKIIDKDKMEKSLAEKVEIGCLRCGCGLGGVAASVGLFGGLGTYGWKSAAIATATNAAMAEATAKGAEAGVKTLIDKLKEAFPIPNLFDPSFEKAITTETYCNEALISGAVKQKYELLCAKGSSCENYSLFSHYRSGGEAEGARALVEGVKKIVGEAMGKASEETLKATESQMASLKSGKLAEISETSYSSYRAIGYSVLAILIIVLVMIIIYLVLRYRRKKKK	323	1	HMM: MKLHYSKILLFLIPLNTLVTSS, NN: MKLHYSKILLFLIPLNTLVTSS	yes	GO_0016020	GO_0020002	GO_0016020,GO_0020002	0	0	0	0	0	0	0	0	0	0	0	0	0	0	0	0	0	0	0	0	0	0	0	0	0	0	0	0	0	0	0	0	0	0	0	0	0
132	PF3D7_0115300	rifin	RIF	ATGAAACTGCACTACACTAAAATATTATTATTTTTCTTTCCATTATATATATTGGTGTATAGTAAAAACAAACCATCCATCACACCACATCATACACAAACCAATAGATCATTATGTGAATGTGACACACAATCGACAAATTATAATAATGATGAGGATATCAAATCAGTGAAGGAAATTTTCGATCGACAAACGTCACAACGTTTTGAAGAATACGAAGAACGTATGCAAGAAAAACGCCAAAAACGTAAAGAACAACGTGACAAAAATATACAAGAAATTATTGAAAAAGATAGAATGGATAAATTATTAGCAGAAAAAGTAGAAAAAGGTTGTCTTAGGTGTGGGTGTGGATTAGGAGGTGTTGCAGCAGGTGTTGGAATATTTGGTACAGTTGCT…	MKLHYTKILLFFFPLYILVYSKNKPSITPHHTQTNRSLCECDTQSTNYNNDEDIKSVKEIFDRQTSQRFEEYEERMQEKRQKRKEQRDKNIQEIIEKDRMDKLLAEKVEKGCLRCGCGLGGVAAGVGIFGTVAVKELTKASTVAAIAAAQEAAAAKGAVAGAEAGIKTVISGLQKLDISTLNGQTLVSYFDTTDYTNFKTIAHAINTQYDPSPCVLGRSGASESFCSWVRANFFAPQEISGKVSSTYESIEIGVTSIVSDAKKAAAAAVKKATDEVIKNSTAAAESTYAGCQTAIIASVVAIIIIALVMIIIYLVLRYRRKKKMNKKAQYTELLNQ	336	1	HMM: MKLHYTKILLFFFPLYILVYSK, NN: MKLHYTKILLFFFPLYILVYSK	yes	GO_0016020	GO_0020002	GO_0016020,GO_0020002	0	0	0	0	0	0	0	0	0	0	0	0	0	0	0	0	0	0	0	0	0	0	0	0	0	0	0	0	0	0	0	0	0	0	0	0	0
348	PF3D7_0222500	rifin	RIF	ATGAAAATGCATTACTCTGAAATATTATTTTTTTCACTTTCATTAAATATATTGATAACATCATCATATGCGCATAGTGAGAATAAACAATACATTACACCATATACACCAAATACTTCATCACGAGTGTTAACCGAATGTGACATTAAAATGTCAATTTATGATAATGATGGGGATATGAAATCTGTGAAGGAAAATTTCGATCGACAAACGTCAGAACGATTTGAAGAATACGACGAACGTATGAAAGATAAACGCCGAAAATGTAAAGAACAATGTGACAAAGATATACAAGAAATTATTGTAAAAGATAAAATGGAAAAATCATTAGCAAAAAAAGTGGAAAAAGGTTGTCTTAGGTGTGGGTGTGGTTTAGGAGGTGTTGCAGCAAGTGTTGGA…	MKMHYSEILFFSLSLNILITSSYAHSENKQYITPYTPNTSSRVLTECDIKMSIYDNDGDMKSVKENFDRQTSERFEEYDERMKDKRRKCKEQCDKDIQEIIVKDKMEKSLAKKVEKGCLRCGCGLGGVAASVGIIGPIAVNEVKKAALVAAAQKGIEVGMAKAIEELGKIVGLSDFSYLNWSAMITATTYYKPMKLVNIVNSANSMCTDSNPAFTSLFCKASYRINSEVSSSRFTEVISQEAAKAASAAGEAAKNAEKAQIALVNEESAHLYSAIGYSVIAILIILLVMVIIYLILRYRRKKKMNKKLQYTKLLNQ	316	1	HMM: MKMHYSEILFFSLSLNILITSSYAH, NN: MKMHYSEILFFSLSLNILITSSYAHSE	yes	GO_0016020	GO_0020002	GO_0016020,GO_0020002	0	0	0	0	0	0	0	0	0	0	0	0	0	0	0	0	0	0	0	0	0	0	0	0	0	0	0	0	0	0	0	0	0	0	0	0	0
360	PF3D7_0300500	rifin	RIF	ATGAAACTGCTCTACTCTAATATATTATTGTTCGCTCTTGCATTAAATATATTGTTAACATCATATTATGCACATAATAAAAATAAACCATCCATCACACCACATCATACACGAACTACTACGTCACGATTGTTAAGCGAATGTGACACAGAATCGTCAATTTATGATAGTGATGAGGAAATCAATTCAGTGAAGGAAATTTTCGAACGACAAACATCACGACGTTTTGAAGAATACGAAGAACGTATGATAACACAACGACAAAAATATAAAGAACAACGTGACAAAGATATACAAAAAATTATTCATAAAGATAAAATGGAGAAAAACTTAGCAGAAAAAATAGAAAAAGGTTGTCTTAGGTGTGGATGTGGGCTAGGAAGTGTTGCAGGAAGTATT…	MKLLYSNILLFALALNILLTSYYAHNKNKPSITPHHTRTTTSRLLSECDTESSIYDSDEEINSVKEIFERQTSRRFEEYEERMITQRQKYKEQRDKDIQKIIHKDKMEKNLAEKIEKGCLRCGCGLGSVAGSIGLFGAVAINIWKPAALDAAIAKAITEGTANISAAGVKAGEATGKVLVISGLKKMGISTLGGKNLESYFATTSYKKVASIAQAVYEQHFEKCEFGYLKEGFTPVGDPSRDIHFCQSVWQQTSVVSKTGHYISPKDVIKRTVETMVSKAEGPANAAAEFVKATETATIKAAEEKTIETASTQLYSAIGYSILAILIIVLIMLIIYLILRYRRKKKMKKKAQYTKLLNE	359	2	HMM: MKLLYSNILLFALALNILLTSYYAH, NN: MKLLYSNILLFALALNILLTSYYAH	yes	GO_0016020	GO_0020002	GO_0016020,GO_0020002	0	0	0	0	0	0	0	0	0	0	0	0	0	0	0	0	0	0	0	0	0	0	0	0	0	0	0	0	0	0	0	0	0	0	0	0	0
607	PF3D7_0401000	rifin	RIF	ATGAAACTGCACTACACTAAAATATTATTATTTTTCTTTCCATTAAATATATTGTTAACATCATATCATGAACATAATAAAAATAAACCATACATCACATCACATACACCAACTACTACCTCAAGAGTTTTAAGCGAATGTGACCTATATATGCCCAATTATGATAAAGATGCGGATATGAAATCTGTGAAGGAAAACTTCGATCGACAAACGTCACAACGTTTTGAAGAATACGAAGAACGTATGAAAGATAAACGGCAAAAACATAAAGAAGAACGTGACAAAAATATACAAGAAATTATTTTAAAAGATAAAATCGAAAGATCATTAGAAGAAAAAGTGGAAAAATGTTGTCTTATATGTGGGTGTGGGTTAGGAGGTGGTGTTGCACCATTTGTT…	MKLHYTKILLFFFPLNILLTSYHEHNKNKPYITSHTPTTTSRVLSECDLYMPNYDKDADMKSVKENFDRQTSQRFEEYEERMKDKRQKHKEERDKNIQEIILKDKIERSLEEKVEKCCLICGCGLGGGVAPFVGLFGGLAVNELKKDAAVAATEAGIKKAIEGVGSIFYLEEGSPIPWMNKIHAGNYNQKMPLVTIVNSIYNNCEDDPSSAGSLFCQASKSFIEERQRPVFTKTISEMAGNAAEAAGKAANEKYAEMTSVGTICSDPIVISAIVVVTIAVILLIIYLILRYRRKKKMNKKLQYTKLLNQ	309	1	HMM: MKLHYTKILLFFFPLNILLTS, NN: MKLHYTKILLFFFPLNILLTS	yes	GO_0016020	GO_0020002	GO_0016020,GO_0020002	0	0	0	0	0	0	0	0	0	0	0	0	0	0	0	0	0	0	0	0	0	0	0	0	0	0	0	0	0	0	0	0	0	0	0	0	0
793	PF3D7_0421200	rifin	RIF	ATGAAACTGCACTACACTAAAATATTATTATTTTTCTTTCCATTATATATATTGGTAACATCATATCATGTGTATAGTAAAAACAAACCATCCATCACATCACATCATACACAAACCAATAGATCATTATGTGAATGTGACACACAATCATCAAATTATGACAAGGATACGGGTATGAAAAGTGTAATGCAACAATTTGTTGATCGTACCTCACAATGTTTTGAAGAATACGATGAACGTATGAATGAAAAACGCCAAAAAAGTAAAGAACAACGTGATAAAAATGTACAAAAAATTATTGAAAAAGATAAAATAGAAAAATCATTAGCAGAAAAAGTAGAAACAGGTTGTCTTAAGTATGGGTGTGGGCTAGGTGGTGTTGCAGGAAGTGTTGGAATA…	MKLHYTKILLFFFPLYILVTSYHVYSKNKPSITSHHTQTNRSLCECDTQSSNYDKDTGMKSVMQQFVDRTSQCFEEYDERMNEKRQKSKEQRDKNVQKIIEKDKIEKSLAEKVETGCLKYGCGLGGVAGSVGIFGTVAVKELTKAAITTATELAKEAAKDGAMAATIKAAGAEAGKKFVIAGLGKLHVSTLDNQILESYFATTKYTNVTKIARAINEQYNPSSCLTGGSGADNSICPWAMENFFAARKIPGKVSSTYNSIEVAVKSIVSDAEPVATAAAQQATEEAIKNSIAVVDAKYVICQNAIIASVVALLIIVLIMIIIYLVLRYRRKNKMNKKAHYTKLLKE	346	2	HMM: MKLHYTKILLFFFPLYILVTSY, NN: MKLHYTKILLFFFPLYILVTSY	yes	GO_0016020	GO_0020002	GO_0016020,GO_0020002	0	0	0	0	0	0	0	0	0	0	0	0	0	0	0	0	0	0	0	0	0	0	0	0	0	0	0	0	0	0	0	0	0	0	0	0	0
837	PF3D7_0500500	rifin	RIF	ATGAAACTACACTGCTCTAAAATATTATTATTTTCGCTTCAATTAAATATATTGATAACATCATCATATGTAAATAATAAAAATAAACCATACATCACACCACATACATCTGCTATTACATCAAGAGTATTAAACGAATGTGACCTATATATGCCCAATTATGATAAAGATGCGGATATGAAATCTGTGAAGGAAAATTTCGATCGACAATCATCACGACGTTTTGAAGAATACGAAGAACGTATGATCACAAACAGACAAAAATACAAAGAACAATGTGAAAAGGATATACAGAAAATTATTTTAAAAGATAAAATCGAAAAGTTATTAGAAGAAAAAGTAGAAAAATGTTGTCTTATATGTGGGTGTGGGTTAGGAGGTGGTGTTGCACCATTTGTT…	MKLHCSKILLFSLQLNILITSSYVNNKNKPYITPHTSAITSRVLNECDLYMPNYDKDADMKSVKENFDRQSSRRFEEYEERMITNRQKYKEQCEKDIQKIILKDKIEKLLEEKVEKCCLICGCGLGGGVAPFVGLFGGLAVNEMKKAAVVAATDVGIKEAIKEVGSIFYLADGSTMEWTKMINAGNYSQKMSLVEIVTILKNKCEEDEALAGPLFCKASEAATESGEVFEFSGNISRMAANAAEAAGNAANGKYAEMTSVGTICSNPVVISAIVVVIIAVILLIIYLILRYRRKKKMKQKQQYTKLLNQ	309	1	HMM: MKLHCSKILLFSLQLNILITSSY, NN: MKLHCSKILLFSLQLNILITSSY	yes	GO_0016020	GO_0020002	GO_0016020,GO_0020002	0	0	0	0	0	0	0	0	0	0	0	0	0	0	0	0	0	0	0	0	0	0	0	0	0	0	0	0	0	0	0	0	0	0	0	0	0
1147	PF3D7_0532900	rifin	RIF	ATGAAAGTCCACTGCTATAACATATTATTATTTTCTCTTCTATTACATAGATTGTTATTATCATCATCGAAGGTAAATATCGAAATGAACCATCACAACACACCCCATATAAAAAACAGAGAACCAACAAAATCATATAGATCATTATGCGAATGTGAACTATATACATACATCTATGATGATGACCCAGATATGAAAGAAATAATGAACGATTTTGATCGACAGACATCACAACGTTTTGAAGAATACAATGAACGTGTGAACAAAAACAGACAAAAATGTAAAGAACAGTGTGATAGAGATATACAAAATATTATTTTAAAAGATAAAGTCGAAAAATCATTATCAGAAAAAGTGGAAAAGGGTTGTCTTAGGTGTGGGTGTGGGTTAGGAGGTGTC…	MKVHCYNILLFSLLLHRLLLSSSKVNIEMNHHNTPHIKNREPTKSYRSLCECELYTYIYDDDPDMKEIMNDFDRQTSQRFEEYNERVNKNRQKCKEQCDRDIQNIILKDKVEKSLSEKVEKGCLRCGCGLGGVAAGVGIFGALGTYGWKVAATATAIEFATQEGIKAGIQAAIEQIKITVFNSLLNVEWLNFINASNYNSIAGLVEAVKAAVVSTERTSELSSNTMDRVRNALSEAENWFSPAVREGTQTTASTITTVQRTQLVDVTATSTYSYMAIAYSVIAILIIVLVMIIIYLILRYRRKKKMNKKAQYTKLLNQ	318	2	HMM: MKVHCYNILLFSLLLHRLLLSSSK, NN: MKVHCYNILLFSLLLHRLLLSSSK	yes	GO_0016020	GO_0020002	GO_0016020,GO_0020002	0	0	0	0	0	0	0	0	0	0	0	0	0	0	0	0	0	0	0	0	0	0	0	0	0	0	0	0	0	0	0	0	0	0	0	0	0
1459	PF3D7_0631800	rifin	RIF	ATGAAACTGTACTACACTAAAATATTATTATTTTGCCTTCCATTAAATATATTGGCACATAGTAAAAATAAACTCTACATGAAACCACACACAAGAACTACTACATCACGAGTGTTAAGCGAATGTGACATAGAAAAATCCATTTATGATAATAATCCTGATATGAAATATGTAAAGGAAAATTTCGATCGACAAACATCACAACGTTTTGAAGAATACAAAGAACGTATGATAAAAAACAGACAAAAATGTAAAGAACAATGTGAAAAGGACATAAAACAAATTATTTTAAAAGATAAAATTGATAAACCAGTAGAAGAAAAAATTGAAAAAGTTTGTCTTAGGTGTGGGTGTGGGTTAGGAGGTGTTGCAGCAAGTGTTGGTGTGTTAGGTACAGCT…	MKLYYTKILLFCLPLNILAHSKNKLYMKPHTRTTTSRVLSECDIEKSIYDNNPDMKYVKENFDRQTSQRFEEYKERMIKNRQKCKEQCEKDIKQIILKDKIDKPVEEKIEKVCLRCGCGLGGVAASVGVLGTAVVNVWKTAAMDAAIGDAITKGLTEGAAMGATEGVAEVIAGLKALNIDKLFPETLGSFISATNYDKASYIFNIVNMKYKGTCKILVPGGLSNPSNSICDSIQTWSLVQGSNHVNVTTDVAIGKEVVKVVTGAKTIAEKTAKMATENVTKGAIKTNVAEVNATYASCQTAIIASVVAILVIVLVMVIIYLILRYRRKKKMNKKLQYTKLLN	342	1	HMM: MKLYYTKILLFCLPLNILAHSK, NN: MKLYYTKILLFCLPLNILAH	yes	GO_0016020	GO_0020002	GO_0016020,GO_0020002	0	0	0	0	0	0	0	0	0	0	0	0	0	0	0	0	0	0	0	0	0	0	0	0	0	0	0	0	0	0	0	0	0	0	0	0	0
1464	PF3D7_0632300	rifin	RIF	ATGAAACTGCACTACACTAAATTATTATTATTTTTCTTTACATTAAATATATTGTTAACATCATATCATGCACATAATAAAAATAAACCATCCATCACATCACATCATACACCAAGATATACATCACGAGTGTTAAGCGAATGTGACACAGAATCGTCAATTTATGATAATGATGAGGAAATCAATTCAGTGAAGGAAATTTTCGAACGACAAGCCTCACAAAGATTACGAGAATATGACGAAAGGTTGCAAGAAAAACGACAAAAACGCAAAGAACAACGTGACAAAAATATACAAAAAATTATTCATAAAGATAAAATGGAGAAAAACGTAGCAGAAAAAATAGAAAAAGGTTGTCTTATGTGTGGGTGTGGGCTAGGAAGTGTTGCAGGAAGTATT…	MKLHYTKLLLFFFTLNILLTSYHAHNKNKPSITSHHTPRYTSRVLSECDTESSIYDNDEEINSVKEIFERQASQRLREYDERLQEKRQKRKEQRDKNIQKIIHKDKMEKNVAEKIEKGCLMCGCGLGSVAGSIGLFGEVAINIWKPVAFDAAITAALNANAVKIAEAANSAGIQAGKEFVIAGLEKLGVSILDNQSLVSYFTTTPYNTASVITTALYKQHYKICVYDPSRNLFSPFGDVNRHIGICNSVLKQTEAVSQSRKYISHIEGIEKTVQTMVSYAEVSAKAAAKTAEAANKLAIEEAQEKVMEATIYNWYTTIGYTILAILIIVLIMIIIYLILRYRRKKKMKKKAQYTKLLNE	359	1	HMM: MKLHYTKLLLFFFTLNILLTSYHAH, NN: MKLHYTKLLLFFFTLNILLTSYHAH	yes	GO_0016020	GO_0020002	GO_0016020,GO_0020002	0	0	0	0	0	0	0	0	0	0	0	0	0	0	0	0	0	0	0	0	0	0	0	0	0	0	0	0	0	0	0	0	0	0	0	0	0
1758	PF3D7_0732700	rifin	RIF	ATGAAACTGCTCTACTCTAATATATTATTGTTCGCTCTTGCATTAAATATATTGTTAACATCATATTATGCACATAATAAAAATAAACCATCCATCACATCACATCATACACCAAGATATACATCACGAGTGTTAAGCGAATGTGACACAGAATCGTCAATTTATGATAATGATGAGGAAATCAATTCAGTGAAGGAAATTTTCGAACGACAAGCCTCACAAAGATTACGAGAATATGACGAAAGGTTGCAAGAAAAACGACAAAAACGTAAAGAACAACGTGACAAAAATATACAAAAAATTATTCATAAAGATAAAATGGAGAAAAACTTAGCAGAAAAAATAGAAAAAGGTTGTCTTATGTGTGGGTGTGGGCTAGGAAGTGTTGCAGGAAGTATT…	MKLLYSNILLFALALNILLTSYYAHNKNKPSITSHHTPRYTSRVLSECDTESSIYDNDEEINSVKEIFERQASQRLREYDERLQEKRQKRKEQRDKNIQKIIHKDKMEKNLAEKIEKGCLMCGCGLGSVAGSIGLFGAVAINIWKPAALDAAIAKAITEGTANISAAGVKAGEATGKVLVISGLKRIGISTLDNQILESYFATTSYKKVASIAQAVYEQHFEKCEFGYLKDGFIPVGDRSRDIHFCQSMWNQTSAVSQPRQYISTEEVIKRTVQNMVSDAEGPANTAAEIAEAIETAKIKAAEEKTIEAASTQLYGAIGYSILAILIIVLIMLIIYLILRYRRKKKMKKKAQYTKLLNE	359	3	HMM: MKLLYSNILLFALALNILLTSYYAH, NN: MKLLYSNILLFALALNILLTSYYAH	yes	GO_0016020	GO_0020002	GO_0016020,GO_0020002	0	0	0	0	0	0	0	0	0	0	0	0	0	0	0	0	0	0	0	0	0	0	0	0	0	0	0	0	0	0	0	0	0	0	0	0	0
1759	PF3D7_0732800	erythrocyte membrane protein 1 (PfEMP1), exon 2	null	ATGATGTCGATTTCGGCTTTTCCTTTAAGTGTAGGAATTGGGTTTGCTGCGTTGAGTTACTTTTTACTAAAGAAAAAACCGAAATCAACTGTTGACCTCATACGTGTACTGAATATCCCGAAACGAGATTATGAAATGCCTACGTTGAAATCCAAAAATAGGTACATATCATATAGAAGTGGTGAATATAAAGGCAAAACATACTTATATGTTGAAGGAGATACTAGTGGGGATGAAAAATATGCATTTATGTCTGATACTACTGATATAACCTCTTCCGAAAGTGAATATGAAGAAATGGATATTAATGATATATATGTACCAGGTAGTCCTAAATATAAAACATTGATAGAAGTAGTACTAGAACCATCAAAAAGTAATGGTAACACACCAAGTAAG…	MMSISAFPLSVGIGFAALSYFLLKKKPKSTVDLIRVLNIPKRDYEMPTLKSKNRYISYRSGEYKGKTYLYVEGDTSGDEKYAFMSDTTDITSSESEYEEMDINDIYVPGSPKYKTLIEVVLEPSKSNGNTPSKGDGNTLGDDMVPTTNTFTDEEWNELKQDFISQYLPNTEPNNNYRSGNSPTNTNNTTTSHDNMGEKPFIMSIHDRNLYTGEEISYNINMSTNTNNDIPKYVSNNVYSGIDLINDTLSGNKHIDIYDEVLKRKENELFGTNHVKQTSIHSVAKNTYSDDAITNKINLFHKWLDRHRDMCEKWENHHERLAKLKEKWENDNDGGNVPSDNHVLNTDVSIEIDMDNPKPINQFSNMDINVDTPTMDNMEDDIYYDVNDNDDDNDQPSVYD…	442	0	HMM: MMSISAFPLSVGIGFAA, NN: MMSISAFPLSVGIGFAA	yes	GO_0016020	GO_0020002	GO_0016020,GO_0020002	0	0	0	0	0	0	0	0	0	0	0	0	0	0	0	0	0	0	0	0	0	0	0	0	0	0	0	0	0	0	0	0	0	0	0	0	0
2083	PF3D7_0900500	rifin	RIF	ATGAAACTGAACTACACTAAAATATTATTATTTTTCTTTCCATTAAATATATTAGTAACATCATATCATGCATATAATAAAAATAAACCATACCTCAAAACACGTCATACGCCAAGATATACATCACGAGTATTAAGCGAATGTGACATCCGATCGTCAATTTATGATAATGATGCGGAGATGAAATCAGTGAAGGGAACTTTCGATCGACAAACATCACAACGTTTTGAAGAATACCAAGAACGTATTAAAGATAAACGCCAAAAACGTAAAGAAGAACGTGACAAAAATATACAAGAAATTATTGAAAAAGATAAAATGGACAAATCATTAGCAGAAAAAGTAGAAACAGGTTGTCTTAAATGTGGGTGTGGTCTAGGAGGTGTTGCAGCAGGTGTT…	MKLNYTKILLFFFPLNILVTSYHAYNKNKPYLKTRHTPRYTSRVLSECDIRSSIYDNDAEMKSVKGTFDRQTSQRFEEYQERIKDKRQKRKEERDKNIQEIIEKDKMDKSLAEKVETGCLKCGCGLGGVAAGVGIIGGIAINIWKPTALDAAIEAAIAKSAAKGATAFKSAVIEGIEKEFGVSILRVHRFESFIDVENYMKVSVISEKVYSHYNTTCIPSGSVHLPSVSDPICTLVSKKLPHASQGSSRTVIESTVKTVVSEAEVSAGMAVKKATDEAIQRSIGVVDAKYAICQTAIIASVVAILIIVLVMIIIYLVLRYRRKKKMNKKLQYTKLLNQ	338	1	HMM: MKLNYTKILLFFFPLNILVTSYHAY, NN: MKLNYTKILLFFFPLNILVTSYHAY	yes	GO_0016020	GO_0020002	GO_0016020,GO_0020002	0	0	0	0	0	0	0	0	0	0	0	0	0	0	0	0	0	0	0	0	0	0	0	0	0	0	0	0	0	0	0	0	0	0	0	0	0
2457	PF3D7_0937400	rifin	RIF	ATGAAACTGAACTACACTAAAATATTATTATTTTTCTTTCCATTAAATATATTGTTAACATCACCATCAAATTCACATAATAATAATAATGAACCACAAACCACTCCACATCATACACAAACTAATAGATCATTATATGAAAGTGACACAGAATCGTCAATTTATGATAAGGATGAGGATATGGAATCAGTGAAGGAAAATTTCGAACGACAAACCTCACAACGTTTTGAAGAATACCAAGAACGTATGAAAGAAAAACAACAAAAACGTAAAGAACAACGTGACAAAAATATACAAAAAATTATTCATAAAGATAAAATGGAGAAAAACTTAGCAGAAAAAATAGAAAAAGGTTGTCTTATGTGTGGGTGTGGGCTAGGAAGTGTTGCAGGAAGTGTT…	MKLNYTKILLFFFPLNILLTSPSNSHNNNNEPQTTPHHTQTNRSLYESDTESSIYDKDEDMESVKENFERQTSQRFEEYQERMKEKQQKRKEQRDKNIQKIIHKDKMEKNLAEKIEKGCLMCGCGLGSVAGSVGLFGGIAINIWKPTALDAAIEAAIAKSAAKITAVAEAARILAGKEAVIAGLEKLGVSILDNQLLVSYFTTTPYNTASVITTALYKQHYKICVYDPSRNLLSSFGDVNRHIGICNSVWKQISVVSQRGQYISHEEVIKRTVETMVSYAEVSAKAAAKTAEVAEKATIKVAQEKVMEATIYNWYTTIGYTILAILIIVLIMIIIYLILRYRRKKKMKKKAQYTKLLNE	359	1	HMM: MKLNYTKILLFFFPLNILLTSPSNSH, NN: MKLNYTKILLFFFPLNILLTSPSNSH	yes	GO_0016020	GO_0020002	GO_0016020,GO_0020002	0	0	0	0	0	0	0	0	0	0	0	0	0	0	0	0	0	0	0	0	0	0	0	0	0	0	0	0	0	0	0	0	0	0	0	0	0
2464	PF3D7_1000300	rifin	RIF	ATGAAACTTCACTGCTCTAAAATATTATTATTTTTACTTCCATTAAATATATTAGTAACATCATTATCAAATGTGCATAATAATAATAAACTATACAACACACCACATCATATACCAACTACTACATCACGAATGTTAAGCGAATGTGACCTATATATACCCAAATATGATAATGATGCGGATATGAAATCAGTAAAGGAAAATTTCGATAGACAAACGTCACAACGTTTTGAAGAATACGATGAACGTATGAAAGGTAAACGCCAAAAACGTAAAGAACAACGTGACAAAAATATACAAGAAATTATTGAAAAAGATAAAATGGACAAATCATTAGCAGAAAAAGTAGAAAAAGGTTGTCTTAGGTGTGGGTGTGGTCTAGGAGGTGTTGCAGCAAGT…	MKLHCSKILLFLLPLNILVTSLSNVHNNNKLYNTPHHIPTTTSRMLSECDLYIPKYDNDADMKSVKENFDRQTSQRFEEYDERMKGKRQKRKEQRDKNIQEIIEKDKMDKSLAEKVEKGCLRCGCGLGGVAASVGLFGGLGIYVSKSAALATAIAEGAETAKAAGEAARIPAAIDAVIKGITKVFGVSTLDGKELGTYITATNYTNFKTIALAINEQYNPLSCIIPDPGADKSICPWVMRNFFAAKDSPRNVVSAYNSIEVAVKSIVLEAQSVTERAAKKATEDVIKSSIAAVDAKYVICQNAIIASVVALLIIVLVMIIIYLVLRYRRKKKMNKKQQYTKLLNQ	345	1	HMM: MKLHCSKILLFLLPLNILVTSLSN, NN: MKLHCSKILLFLLPLNILVTSLSN	yes	GO_0016020	GO_0020002	GO_0016020,GO_0020002	0	0	0	0	0	0	0	0	0	0	0	0	0	0	0	0	0	0	0	0	0	0	0	0	0	0	0	0	0	0	0	0	0	0	0	0	0
2467	PF3D7_1000600	rifin	RIF	ATGAAACTGCACTACTCTAATATATTATTATTTTTCTTTCCATTAAATATATTAGTAACATCATATCATGTATATAATAAAAATAAAATATACATCACACCACATCATACAACAACTACTACATTACGAATGTTAAGCGAATATGGCGTACATACGTCAATTTATAAAAATGATGAAAATATGAAATCTTTGAAGGAAAATTTCGATCGACAAACGTCACAACGTTTTGAAGAATACGAACAACGTATGATCAGAAAAAGAAAAAAATACAAAGAACAGTGCGACAAAGATATACAAAAAATTATTGAAAAAGATAAAATGGACAAATCATTAGCAGAAAAAGTAGAAACAGGTTGTCTTAAGTATGGGTGTGGGCTAGGTGGTGTTGCAGGAAGTGTT…	MKLHYSNILLFFFPLNILVTSYHVYNKNKIYITPHHTTTTTLRMLSEYGVHTSIYKNDENMKSLKENFDRQTSQRFEEYEQRMIRKRKKYKEQCDKDIQKIIEKDKMDKSLAEKVETGCLKYGCGLGGVAGSVGLFGGFGIYGWKTAALAASKNAAVAEATAKGVAKAIDLVKSTFDVQNIAGQPLETVLNVINYTDVSNIYHLIYSQYKTTCISTSSTPVTGGPETFCISIWNKSLSGLGSNVVFVEETKVIEATVKTIVSSAEKVAGEALEKATEGVIKTSTATIESTYASCQIAIIASVVALLIIALVMIIIYLVLRYRRKKKMNKKAHYTKLLNQKIYSFKILNPFLCCMNSRCLNT	361	3	HMM: MKLHYSNILLFFFPLNILVTSY, NN: MKLHYSNILLFFFPLNILVTSY	yes	GO_0016020	GO_0020002	GO_0016020,GO_0020002	0	0	0	0	0	0	0	0	0	0	0	0	0	0	0	0	0	0	0	0	0	0	0	0	0	0	0	0	0	0	0	0	0	0	0	0	0
2861	PF3D7_1040100	rifin	RIF	ATGAAAATGCGTTACTCTGAAATATTATTTTTTTCACTTTCATTAAATATATTGATAACATCATCATATGCGCATAATAAAAATAAAATATACATCAAATCACATACACCAACTAATACATCACGAGTGTTAAGCGAATGTGACATGCAAACGTCAAATTATGATAATGATCCGGATATGAAATCTGTGAAGGAAAATTTTGAGCGACAAACATCACAACGTTTTGAAGAATACGAAGAACGTATGCAAGAAAAACGACGAAAATGTAAAGAACAATGCGATAAAGATATACAACAAATTATTGTGAAAGATAAAATCAAAAAATCATTAGATGAAAAAGTGGAAAAAGTTTGTCTTAAGTGTGGGTGTGGGTTAGGAGGCGTTGGAGCAAGTATTGGA…	MKMRYSEILFFSLSLNILITSSYAHNKNKIYIKSHTPTNTSRVLSECDMQTSNYDNDPDMKSVKENFERQTSQRFEEYEERMQEKRRKCKEQCDKDIQQIIVKDKIKKSLDEKVEKVCLKCGCGLGGVGASIGIFGAIAVSEVTKAATAAAVQNSIETGIATVVSELHDMTQSFLKVGIDIVGMINKETYRCPQALTTSIYAAKQEVCVGKIGETELVCNQLGQGGTPIWFGPKVLQATTEGIKIAKTTEDSKIALINAESSHLYSAIGYSVLAIFIIVLVMVIIYLFLRYRRKKKMNKKLQYTKLLNK	309	1	HMM: MKMRYSEILFFSLSLNILITSSYAH, NN: MKMRYSEILFFSLSLNILITSSYAH	yes	GO_0016020	GO_0020002	GO_0016020,GO_0020002	0	0	0	0	0	0	0	0	0	0	0	0	0	0	0	0	0	0	0	0	0	0	0	0	0	0	0	0	0	0	0	0	0	0	0	0	0
2864	PF3D7_1040400	rifin	RIF	ATGAAACTGCAGTACTCTAAAATATTATTATTTTCCCTTCCATTAAATATTTTGGTGTCATCATCATATGCACATAATAAAAATAAATCATACATAGCACCGCATATACCAACTACTACAACACGAGTGTTAAGCGAATGTAACCTATATATACCAAAATATGATAATGATGCGGATATGAAATCTGTTAAGGAAAATTTCGATCGACAAACCTCACAACGTTTTGAAGAATACGAAGAACGTATGATCAAAAACAGACAGAAACGTAAAGAACAACGTGACAAAAATATACAAAAAATTATTCATAAAGATAAAATGGAGAAAAACTTAGCAGAAAAAGTAGAAATAGGTTGTCTGAGATGTGGGTGTGCGTTAGGAGGTGTTGCAGCAAGTGTTGGA…	MKLQYSKILLFSLPLNILVSSSYAHNKNKSYIAPHIPTTTTRVLSECNLYIPKYDNDADMKSVKENFDRQTSQRFEEYEERMIKNRQKRKEQRDKNIQKIIHKDKMEKNLAEKVEIGCLRCGCALGGVAASVGLFGGLGTYGWKIAATATAMELAKEAAEQAGAAAAADAGKNAVIAGLKELGVQNIAGQPLVSYLTATNYHNATFISSAINNQYSPSSCIFVSSGTRSGPVARETFCTWVMQKSTAAANVQRSSVSFNDLIIKTIENIVTDAKKAAGEATEKAIEEVIQRSTAAVESTYASCQSAIIASVVAIVVIALVMIIIYLVLRYRRKKKMNKKAQYTELLNQ	348	1	HMM: MKLQYSKILLFSLPLNILVSSSYAH, NN: MKLQYSKILLFSLPLNILVSSSYAH	yes	GO_0016020	GO_0020002	GO_0016020,GO_0020002	0	0	0	0	0	0	0	0	0	0	0	0	0	0	0	0	0	0	0	0	0	0	0	0	0	0	0	0	0	0	0	0	0	0	0	0	0
2866	PF3D7_1040600	rifin	RIF	ATGAAACTGCACTTCCCTAAAATATTATTATTTTTCTTTCCATCAAATATATTGTTAACATCATATCATGTACATAGTAAAAATAAACCACACACCACACCACATCATACACCAACTACTACATCACGAGTGTTAAGCGAATGTGACACACAATCGACAAATTATAATAATGATGAGGATATCAAATCAGTGAAGGAAATTTTCGATCGACAAACGTCACAACGTTTTGAAGAATACGAAGAACGTATGCAAGAAAAACGCCAAAAACGTAAAGAAAAATGTGACAAAAATATACAAAAAATTATTCAAAAAGATAAAAGGGAAAAATCATTAGAAGAAAAAGTGGAAAAATGTTGTCTTATATGTGGGTGTGGTCTAGGAGGTGTAGCAGCAAGTGTT…	MKLHFPKILLFFFPSNILLTSYHVHSKNKPHTTPHHTPTTTSRVLSECDTQSTNYNNDEDIKSVKEIFDRQTSQRFEEYEERMQEKRQKRKEKCDKNIQKIIQKDKREKSLEEKVEKCCLICGCGLGGVAASVGIFGTIAVNEWTKAAIEIAKGIGMNKATSAGVAKGIEATIDGLKGMLGFGNLRGVDIPAMVTEKSFNDANLLVPSIQKAYYNSCSQIPTGSAKPPFCGAVETNMQIVFSSAHSIAMESGELATKTTATLSPQFISDEITLAKTASTNLYNVITYSVIVIILIVLVMLIIYLVLRYRRKKKMNKKQQYTKLLNQ	326	1	HMM: MKLHFPKILLFFFPSNILLTSYHVHSK, NN: MKLHFPKILLFFFPSNILLTS	yes	GO_0016020	GO_0020002	GO_0016020,GO_0020002	0	0	0	0	0	0	0	0	0	0	0	0	0	0	0	0	0	0	0	0	0	0	0	0	0	0	0	0	0	0	0	0	0	0	0	0	0
2868	PF3D7_1040800	rifin	RIF	ATGAAACTGTACTACTTTAAAATATTATTATTTTCCCTTCTATTAAATATATTGGCACATAATAAAAATAAATCATACATAGCACCGCATATACCAACTACTACAACACGAGTGTTAAGCGAATGTAACGTATATATTCCCAATTATGATAATGATCCGGATATGAATTCTGTGAGGGAAAATTTCCATAAGAAAACAGAACAAAGATTTCATGAATACGACAAACGTATGATCAAAAACAGACAGAAACGTAAAGAAGAACGTGACAAAAATATACAAGAAATTATTGAAAAAGATAGAATGGACAAATCATTAGCAGAAAAAGTGGAAAAAGGTTGTCTTAAGTGTGGGTGTGGGTTAGGAGGTGTTGCAGCAAGTATTGGAATATTTGGAACAATT…	MKLYYFKILLFSLLLNILAHNKNKSYIAPHIPTTTTRVLSECNVYIPNYDNDPDMNSVRENFHKKTEQRFHEYDKRMIKNRQKRKEERDKNIQEIIEKDRMDKSLAEKVEKGCLKCGCGLGGVAASIGIFGTIAVNEWTKAATAAAIDLAIQEGIDAGVKVVIAEIKATNAFKSIWYVELSSFINGSNYNTVDGLSAATKAALDSIGKRCTSSIVDRACNGILNNSDGWFSSIAEAGKQAATAATESAKTTKLVDVTTTSTHLYSAIGYSVLAIFIILLVMVIIYLILRYRRKKK	295	1	HMM: MKLYYFKILLFSLLLNILAH, NN: MKLYYFKILLFSLLLNILAH	yes	GO_0016020	GO_0020002	GO_0016020,GO_0020002	0	0	0	0	0	0	0	0	0	0	0	0	0	0	0	0	0	0	0	0	0	0	0	0	0	0	0	0	0	0	0	0	0	0	0	0	0
2869	PF3D7_1040900	rifin	RIF	ATGAAACTGCACTTCCCTAAAATATTATTATTTTTCTTTCCATCAAATATATTGTTAACATCATATCATGTACATAGTAAAAATAAACCACACACCACACCACATCATACACCAACTACTACAACACGAGTGTTAAGCGAATGTGACATCCGATCGTCAATTTATGATAATGATGCGGAGATGAAATCAGTGAAGGAAACTTTCGATCGACAAACATCACAACGTTTTGAAGAATACGAAGAACGTATGAAAGGTAAACGCCAAAAACGTAAAGAAGAACGTGACAAAAATATACAAGAAATTATTGAAAAAGATAGAATGGACAAATCATTAGCAGAAAAAGTGGAAAAAGGTTGTCTTAAGTGTGGGTGTGGGTTAGGAGGTGTTGCAGCAAGTATT…	MKLHFPKILLFFFPSNILLTSYHVHSKNKPHTTPHHTPTTTTRVLSECDIRSSIYDNDAEMKSVKETFDRQTSQRFEEYEERMKGKRQKRKEERDKNIQEIIEKDRMDKSLAEKVEKGCLKCGCGLGGVAASIGIFGTIAVNEWTKAATATATQKGIEAGINVVIDTLKNLFHIDGVTDLKWKTLITAQNYTDKSLVDGVIRELARTLCRGSEDTAGGFCLFTDKANTLTQAINGHVPKAISKGTAEFVTVTEAEIGNVTTTGGAYFTGIIVSVVVIVVIVLVMIIIYLVLRNRRKTKMTKKLQYMKLLKE	311	1	HMM: MKLHFPKILLFFFPSNILLTSYHVHSK, NN: MKLHFPKILLFFFPSNILLTS	yes	GO_0016020	GO_0020002	GO_0016020,GO_0020002	0	0	0	0	0	0	0	0	0	0	0	0	0	0	0	0	0	0	0	0	0	0	0	0	0	0	0	0	0	0	0	0	0	0	0	0	0
2871	PF3D7_1041100	rifin	RIF	ATGAAACTGCACTACACTAAAATATTATTATTTTTCTTTCCATTATATATATTGGAACATAATCAAAATAAACCATACATTACACAACATCATACACCAACTACTACATCACGAGTGTTAAGCGAATGTGATATACCTACGTCAAATTATAATAATGATGAGGATATGAAATCTGTGAAGGAAAATTTCGATCGACAAACGTCAAAACGTTTTGATGAATACGAAGAACGTATGAAAGATAAACGCCAAAAACGTAAAGAAGAACGTGACAAAAATATACAAGAAATTATTGAAAAAGATAGGATGGACAAATTATTAGCAGAAAAAGTAGAAAAAGGTTGTCTTAGGTGTGGGTGTGCGTTAGGTGGTGTTGCAGCAAGTGTTGGATTATTCGGGGGA…	MKLHYTKILLFFFPLYILEHNQNKPYITQHHTPTTTSRVLSECDIPTSNYNNDEDMKSVKENFDRQTSKRFDEYEERMKDKRQKRKEERDKNIQEIIEKDRMDKLLAEKVEKGCLRCGCALGGVAASVGLFGGLGIYVSKSAALATAIAEGAETAKAAGEAARIPAAIDAVIKGIETKFGVSTLGGQKMETFFNTTLYTEVSKIADAVYNQYAATCITSGNGARGPICTLAWQYSESRGNVVSAYNSIEVAVKPIVSQAETVAERAVKTATDEAIQRSIGVVESTYAICQTAIIASVVAIIIIALVMIIIYLVLRYRRKKKMNKKLQYTKLLNQ	334	1	HMM: MKLHYTKILLFFFPLYILEHNQN, NN: MKLHYTKILLFFFPLYILEHN	yes	GO_0016020	GO_0020002	GO_0016020,GO_0020002	0	0	0	0	0	0	0	0	0	0	0	0	0	0	0	0	0	0	0	0	0	0	0	0	0	0	0	0	0	0	0	0	0	0	0	0	0
2881	PF3D7_1101200	rifin	RIF	ATGAAACTGCACTACACTAAAATGTTATTATTTTTCTTTCTATTAAATATATTGTTAACATCATATTATGCACATAATAAAAATAAACCATCCATCACATCACATCATACACCAAGATATACATCACGAGTGTTAAGCGAATGTGACACAGAATCGTCAATTTATGATAGTGATGAGGAAATCAATTCAGTGAAGGAAATTTTCGAAAGACAAACCTCACAAAGATTACGAGAATATGACGAAAGGTTGCAAGAAAAACGACAAAAACGTAAAGAACAGCGTGACAAAAATATACAAAAAATTATTCAAAAAGATAAAATGGAGAAAAACTTGGCAGAAAAAATAGAAAAAGGTTGTCTTATGTGTGGGTGTGGGCTAGGAAGTGTTGCAGGAAGTGTT…	MKLHYTKMLLFFFLLNILLTSYYAHNKNKPSITSHHTPRYTSRVLSECDTESSIYDSDEEINSVKEIFERQTSQRLREYDERLQEKRQKRKEQRDKNIQKIIQKDKMEKNLAEKIEKGCLMCGCGLGSVAGSVGLFGGIAINIWKNVALDVGIKEAIKAAAAEISASANAAGAAEIMKLIKSKFVVSTLGGKDLGTYFATTSYKDVTNITQAVQQLYFEKCILPSSGSLRFPFADANRHIPICQSVWNQIQTVSQRGQYISPDEIIKRTVKTMVADAEEPAKAAAEAARESAINAIKARETGLINTVFMSKQTAIIASVVAILIIVLVMIIIYLVLRYRRKKKMNKKAQYTKLLKE	356	1	HMM: MKLHYTKMLLFFFLLNILLTSYYAH, NN: MKLHYTKMLLFFFLLNILLTSYYAH	yes	GO_0016020	GO_0020002	GO_0016020,GO_0020002	0	0	0	0	0	0	0	0	0	0	0	0	0	0	0	0	0	0	0	0	0	0	0	0	0	0	0	0	0	0	0	0	0	0	0	0	0
3351	PF3D7_1149800	rifin	RIF	ATGAATCTGCACTACACTATAATATTATTTTTTTGCCTTCCATTAAATATATTGGAAATATCATCATATGAAATTAATAAAAATAAACCATACATCTCACCACATACACCAACTACATTACGAGTGTTAAGCGAATGTGACCTACATACATCAATTTATGATAATGATTCGGATATGAAATCTGTTAAGGAAAATTTCGATCGACAAACATCACAACGTTTTGAAGAATACGAAGAACGTATGATAAAAAACAGAAAAAGATGTAAAGAACAATGTGACAAAGATATAAAAAAAATTATTGTAAAAGACAAAATCGAAAAATCATTTGCAGAAAAACTGGAAAAAGGTTGTCTTAGGTGTGGGTTTGGGTTAGGAGGTGTTGCAGCAAGTGTTGGAATA…	MNLHYTIILFFCLPLNILEISSYEINKNKPYISPHTPTTLRVLSECDLHTSIYDNDSDMKSVKENFDRQTSQRFEEYEERMIKNRKRCKEQCDKDIKKIIVKDKIEKSFAEKLEKGCLRCGFGLGGVAASVGIIGPIIVNELKKTALVAAAQTGTEAGIDKAIEVVISKYGVNKLYGVALEKSITSNNFKNVMFYIQAIQHRYNTMVCSAEPIDDIGPLCFLKDSLNDGVLFTKSISASAQKVVADATEKATLVTKAEVSAAEATSVNLYYAIAYSVIAILVIVLVMVIIFLILRYRRKKKMNKKAQYTKLLNQ	314	1	HMM: MNLHYTIILFFCLPLNILEISSY, NN: MNLHYTIILFFCLPLNILEISSY	yes	GO_0016020	GO_0020002	GO_0016020,GO_0020002	0	0	0	0	0	0	0	0	0	0	0	0	0	0	0	0	0	0	0	0	0	0	0	0	0	0	0	0	0	0	0	0	0	0	0	0	0
3359	PF3D7_1200300	rifin	RIF	ATGAAACTGCACTGCTCTAAAATATTATTATTTTTCTTTCCATTAAATATATTAGTAACATCATATCATGTGTATAGTAAAAACAAACCATCCATCACATCACATCATACACAAACCAATAGATCATTATGTGAATGTGACACACAATCGACAAATTATAATAATGATGAGGAAATCAAATCAGTGAAGGAAAATTTCGATCGACAAGCGTCGCAACGTTTTGAAGAATACGAAGAACGTATGAAAGAAAAACGCCAAAAATGTAAAGAACAACGTGACAAAAGTATACAAGAAATTATTGAAAAAGATAAAAGGGAAAAATCATTAGCACAAAAAGTAGAAAAAGGTTGTCTTATATGTGGGTGTGGGCTAGGAAGTGTTGCAGGAAGTGTTGGAATA…	MKLHCSKILLFFFPLNILVTSYHVYSKNKPSITSHHTQTNRSLCECDTQSTNYNNDEEIKSVKENFDRQASQRFEEYEERMKEKRQKCKEQRDKSIQEIIEKDKREKSLAQKVEKGCLICGCGLGSVAGSVGIFGTVAVKELTKAAIAKAVVVAKEAGMAAAKAEGAAAGKEFVIAKLQEMGISTVGVQGLQSYFVTTDYTNALTIFRAINNQYSPSSCIFVSSGTRQAFCTWVTEQSKSVANIREMLQGNSVSYTKVTEKAVGTIVTDAKKAAGEATEKAIEEVIQRSTAAAESTYAGCQSAIIASVVAIIIIALVMIIIYLVLRYRRKKKMKKKAEYTKLLNQ	345	1	HMM: MKLHCSKILLFFFPLNILVTSY, NN: MKLHCSKILLFFFPLNILVTSY	yes	GO_0016020	GO_0020002	GO_0016020,GO_0020002	0	0	0	0	0	0	0	0	0	0	0	0	0	0	0	0	0	0	0	0	0	0	0	0	0	0	0	0	0	0	0	0	0	0	0	0	0
3620	PF3D7_1227200	potassium channel K1	K1	ATGAATAATGATAATATTGGGAGAGAGCCTATAGATGTTGTTTATGATAAAAGGTTTAGTAGCAGAATTAAACCAAAAACTAAAAAGAAGAAAAGGAATGAAAACAGAATGCGATTAGTTCGAATACAACATTATATTTATAATATATTTACATCATTTTTGTGTTTATTTATTGTGATATTAATTTTATATGCTTCTATAGATATATCAATAAATTATGGGCCAGTAATAATATTATATATATTAATATTAGAATTGGGTAGTATGCTTATATCATATATTTTATTACAATTCCCTTTTTTTTATCGTAAATTAAAAAATACATTTATGAGAGCTCGTAATATTAACAAATATTCACATCAATATAGACCTCTGTATTATGATAACAATTCATTTACC…	MNNDNIGREPIDVVYDKRFSSRIKPKTKKKKRNENRMRLVRIQHYIYNIFTSFLCLFIVILILYASIDISINYGPVIILYILILELGSMLISYILLQFPFFYRKLKNTFMRARNINKYSHQYRPLYYDNNSFTDENESFNISDDEKKEKRKRKHTYSFMSSDGGRKRSNFRRFLSSYKSKKGNEFVNSKTMKNKTKKNTRRKGFLSFNWIGYKNGETNKNRNDNIVNDVYKKYNDDNKYNDDNKYNDDNYNDDDNKYNDDDILNSHSEQDQRKKKKKKKEKRIVVFPRNDTGGNSFKRESIYIDDCNMWMKKTMRKSNRPNFKLTRSLSFNINMNKDDDLMMKDSASLDNIQIFLGHRSSKFLREKNKLQKRKTSIYNKYVPLTFASSYKDDFFKEILK…	1966	8	null	no	GO_0016020	GO_0020002	GO_0016020,GO_0020002	0	0	0	0	0	0	0	0	0	0	0	0	0	0	0	0	0	0	0	0	0	0	0	0	0	0	0	0	0	0	0	0	0	0	0	0	0
3874	PF3D7_1254000	rifin	RIF	ATGAAACTGCTGCACTACTGTAAAGTATTGTTATTTTCCCTTCCATTAAATATATTGGTGTATAGTAAAAATAAACCATACATCACACCACGTCATACACCAAATACTACATCACGAGTATTAAGCGAATGTGATATAAATACGTCCATTTATCATAATGATCCGGATATGAAATCTGTGAAAGAAAATTTCGATCGACAAACCTCACAAAGATTACGAGAATATGACGAAAGGTTGCAAGATAAACGACAAAAACGTAAAGAACAACGTGACAAAAATATACAAAAAATTATTCATAAAGATAAAATGGAGAAAAAATTAGCAGAGAAAATAGAAAAAGGTTGTCTTATGTGTGCGTGTGGGCTAGGAAGTGTTGCAGGAAGTGTTGGATTATTAGGG…	MKLLHYCKVLLFSLPLNILVYSKNKPYITPRHTPNTTSRVLSECDINTSIYHNDPDMKSVKENFDRQTSQRLREYDERLQDKRQKRKEQRDKNIQKIIHKDKMEKKLAEKIEKGCLMCACGLGSVAGSVGLLGGFGIYVSKSAALATAIAEGAETAKAAGEAARIPAAIDAVIKGITKVFGVSTLGVQRLESLFTANIYNNVTMIARAINEQYNPSSCILPIGGSGADKSICPWVMEKYLPAQNIPEMTRGGALSMNDVIETAVKSIVTDAKTVAETAAKKATEEAIKASTDAVESAYAACQTAIIASVVAILVIVLVMMIIYLILRYRRKKKMNKKQQYTKLLNQ	346	1	HMM: MKLLHYCKVLLFSLPLNILVYSK, NN: MKLLHYCKVLLFSLPLNILVYSK	yes	GO_0016020	GO_0020002	GO_0016020,GO_0020002	0	0	0	0	0	0	0	0	0	0	0	0	0	0	0	0	0	0	0	0	0	0	0	0	0	0	0	0	0	0	0	0	0	0	0	0	0
3879	PF3D7_1254500	rifin	RIF	ATGAAAGTGCAATACTCTAAAATATTATTATTTCCCCTCCTATTAAATATATTGTCACATAATAAAAACAAACCATACATCACAACACATACACCAACTACTACATCACGAGTGTTAATCGAATGTAACATATATATTCCCAATTATAATAATGATCCGGATATGAATTCTGTGAGGGAAAATTTCGATCGACAAACGTCTCAACGTTTTGAAGAATACGAAGAACATATGCAAGATAAGCGACAAAAATGTAAAGAACAATGTGATAAAGATATACAAAAAATTATTTTAAAAGATAAAATGGAAAAATCGTTAGCAGAAAAAGTGGAAAAAGTTTGTCTTATTTGTGCATGTGGGTTAGGGGGTGGTGTAGCACCTGTTTGGGGTCTGGTCAGCGGT…	MKVQYSKILLFPLLLNILSHNKNKPYITTHTPTTTSRVLIECNIYIPNYNNDPDMNSVRENFDRQTSQRFEEYEEHMQDKRQKCKEQCDKDIQKIILKDKMEKSLAEKVEKVCLICACGLGGGVAPVWGLVSGLWYVKWSQYVPVAVTKAGITEGIKEGLSQIMKLTTQWHPGAKTPPVDVTHILSSGKFTNTVTLYDIVHHINDSLYSTLDTQGYTQYCGAISSMASNNLSKFNRTYSTQLQLVSKAVTDAEIAESTKLAADTIILTNTIIASVVAIVVIALVMLIIYLILRYRRKKKNDEKTAI	306	1	HMM: MKVQYSKILLFPLLLNILSH, NN: MKVQYSKILLFPLLLNILSH	yes	GO_0016020	GO_0020002	GO_0016020,GO_0020002	0	0	0	0	0	0	0	0	0	0	0	0	0	0	0	0	0	0	0	0	0	0	0	0	0	0	0	0	0	0	0	0	0	0	0	0	0
3884	PF3D7_1255000	rifin	RIF	ATGAAACTTCACTGCTCTAAAATATTATTATTTTTACTTCCATTAAATATATTAGTAACATCATTATCAAATGTGTATAGTAAAAATAAATCATACATCACACAACGTCATACGCCAAGATATACATCACGAGTGTTAAGCGAATGTGACATACCATCGTCAATTTATGATAATGATCCGGACATGAAATCAGTGAAGGGAACTTTCGATCGACAAACGTCACAACGTTTTGAAGAATACGATGAACGTATGAAAGGTAAACGCCAAAAACGTAAAGAAGAACGTGACAAAAATATACAAGAAATTATTGAAAAAGATAGAATGGACAAATCATTAGCAGAAAAAGTAGAAAAATGTTGTCTTATATGTGGGTGTGGGCTAGGAGGTGTTGCAGCAAGT…	MKLHCSKILLFLLPLNILVTSLSNVYSKNKSYITQRHTPRYTSRVLSECDIPSSIYDNDPDMKSVKGTFDRQTSQRFEEYDERMKGKRQKRKEERDKNIQEIIEKDRMDKSLAEKVEKCCLICGCGLGGVAASVGLIGGLTVNELKKAAMVVAIAGAQKSGALAGEVARIPAAIEAVISGIEREFGVSTDGVQGLKSLFTANTYNDVTMIARAINSEYNASSCLIGRSATDNSICPWVMTKQGAAPRIQGKAVSTYEVIETAVKSIVSDAPKAAETAVETATKEFIKASTDAVESTYASCQIAIIASVVAILIIVLVMIIIYLILRYRRKKKMKKKAQYTKLLNE	345	3	HMM: MKLHCSKILLFLLPLNILVTSLSN, NN: MKLHCSKILLFLLPLNILVTSLSNVYSK	yes	GO_0016020	GO_0020002	GO_0016020,GO_0020002	0	0	0	0	0	0	0	0	0	0	0	0	0	0	0	0	0	0	0	0	0	0	0	0	0	0	0	0	0	0	0	0	0	0	0	0	0
3892	PF3D7_1300600	rifin	RIF	ATGAAACTTCACTGCTCTAAAATATTATTATTTTTACTTCCATTAAATATATTAGTAACATCATTATCAAATGTGCATAGTAAAAATAAACCATACATCACATCACGTCATACAGCAACTACTATATCGCGAGTGTTAAGCGAATGTGACATCCGATCGTCAATTTATGATAATGATGAGGATATCAAATCAGTGAAGGAATGTTTTGATCGACAAACATCACAACGATTTGAAGAATACGAAGAACGTATTCAAGAAAAACGCCAAAAACGTAAAGAAGAACGGGACAAAAATATAAAAAAAATAATTGAAAAAGATAAAATGGACAAATCATTAGCAGAAAAAGTAGAAAAAGGTTGTCTTAGGTGTGGGTGTGCGTTAGGAGGTGTTGCAGCAAGT…	MKLHCSKILLFLLPLNILVTSLSNVHSKNKPYITSRHTATTISRVLSECDIRSSIYDNDEDIKSVKECFDRQTSQRFEEYEERIQEKRQKRKEERDKNIKKIIEKDKMDKSLAEKVEKGCLRCGCALGGVAASVGLFGGLGIYGWKTAALATAIAEGAAKGAVAAEAARIAEGIKAVIKGIETKFGVSTDGLQGFKSFFTANTYNNVKNIARAINNQYEPSSCPITVPVDSKPICTWVRANFFAAKDSPGNFTSTYEVVETAVTSIVSDAEPVATAAAQQATEEAIKASTDAVESAYAACQTAIIASVVAILVIVLVMIIIYLVLRYRRKKKMKKKAQYTKLLNE	345	1	HMM: MKLHCSKILLFLLPLNILVTSLSNVHSK, NN: MKLHCSKILLFLLPLNILVTSLSNVHSK	yes	GO_0016020	GO_0020002	GO_0016020,GO_0020002	0	0	0	0	0	0	0	0	0	0	0	0	0	0	0	0	0	0	0	0	0	0	0	0	0	0	0	0	0	0	0	0	0	0	0	0	0
4588	PF3D7_1400300	rifin	RIF	ATGAAACTGCTCTACTCTAAAATATTATTGTTCGCTCTTGCATTAAATATATTGTTAACATCATATTATGCACATAATAAAAATAAAATATACATCAAATCACATACACCAACTACTAGATCACGATTGTTAAGCGAATGTGACCTATATATGTCCAGTAATGATAATGATCCGGATATGAAATCTGTGAAGGAAAATTTTGATCGACAAACATCACAACGTTTTGAAGAATATGATGAACGTATGAAAGATAAACGCCAAAAACGTAAAGAACAAAGAGATAAAAATATAGACGAAATTATTAAAAAAGATAGAATGGACAAATCATTAGCAGAAAAAGTAGAAAAATGTTGTCTTATATGTGGGTGTGGATTAGGAGGTGTTGCAGCAGGTATTGGA…	MKLLYSKILLFALALNILLTSYYAHNKNKIYIKSHTPTTRSRLLSECDLYMSSNDNDPDMKSVKENFDRQTSQRFEEYDERMKDKRQKRKEQRDKNIDEIIKKDRMDKSLAEKVEKCCLICGCGLGGVAAGIGIIGGITISELKKAAMATAIVSAKEAGMAAAKAEGAAAGKEFVIAGLKRMGISTLGGKDLGTYFATTDYTNFKTIARVINSEYQTDSCLIGGSGAEKPICTWVRAKEGAARVIQGKQFSTQETIKTGVENIVSNAETVAGEASKKATEDVIKSSIAAVDAKYVICQNAIIASVVAILVIVLVMIIIYLILRYRRKKKMTKKLQYTKLLNQ	342	3	HMM: MKLLYSKILLFALALNILLTSYYAH, NN: MKLLYSKILLFALALNILLTSYYAH	yes	GO_0016020	GO_0020002	GO_0016020,GO_0020002	0	0	0	0	0	0	0	0	0	0	0	0	0	0	0	0	0	0	0	0	0	0	0	0	0	0	0	0	0	0	0	0	0	0	0	0	0
4590	PF3D7_1400500	rifin	RIF	ATGAAAGTGCACTACACTAAAATATTATTATTTTCTCTTCCATTAAATATATTGGTAACATCATCATCAAATGCTCATAGTAAAAATAAAACATACATTACATTACGTCATACACCACCTATTAAATCACGAGTATTAAGCGAATGTGACCTATATATACCCAAATATGATAATGATGCGGAGATGAAATCAGTGAAGGGAACTTTCGATCGACAAGCGTCGCAACGTTTTGAAGAATACGAAGAACGTATTAAAGATAAACGCCAAAAACGTAAAGAAGAACGTGATAAAGACATACAAAAAATTATTTTAAAAGATAAAGTCGAAAAATCATTAGCAGAAAAAGTGGAAAAAGGTTGTCTTAAATGTGGGTGTGGGTTAGCAGGTGTTGCAACAAGT…	MKVHYTKILLFSLPLNILVTSSSNAHSKNKTYITLRHTPPIKSRVLSECDLYIPKYDNDAEMKSVKGTFDRQASQRFEEYEERIKDKRQKRKEERDKDIQKIILKDKVEKSLAEKVEKGCLKCGCGLAGVATSVSIIGPIAVNEWTKAALLSAKSSAIAEGNIKGIEAGVNAGIKAVIDGLKSKFSLDIVAGKALEDLVTKTTYLNKNLLSEPFHIQYQSMCVGPTADIDKPLCAFNIKNDTTWALKAIDGNVEKIISEAIKTTDTVTSNVTASEIPSIEALEKAAIEITCSNFHTAIIVSVVAILVIVLVMVIIYLILRYRRKKKMNKKQQYTKLLNQ	339	1	HMM: MKVHYTKILLFSLPLNILVTSSSNAH, NN: MKVHYTKILLFSLPLNILVTSSSNAH	yes	GO_0016020	GO_0020002	GO_0016020,GO_0020002	0	0	0	0	0	0	0	0	0	0	0	0	0	0	0	0	0	0	0	0	0	0	0	0	0	0	0	0	0	0	0	0	0	0	0	0	0
4593	PF3D7_1400800	rifin	RIF	ATGAAACTGCTCTACTCTAAAATATTATTGTTCGCTCTTGCATTAAATATATTGTTAACATCATATTATGCACATAATAAAAATAAACCATACATCATACCACGTTATACACCAACTGCTACATCACGGGTGTTAAGCGAATGTGACATACATGCGCCAATTTATTATAATGATGAGGATATGAAATCTGTGAAGGAAAATTTCGAGCGACAAACGTCACGACGTTTTGAAGAATACAATGAACGTATGAACAAAAACAGACAGAAATGTAAAGAACAACGTGACAAAGATATACAAAAAATTATTTTAAAGGATAAAATAGAAAAATCATTAGAAGAAAAAGTGGAAAAAGGTTGTCTTAGGTGTGCGTGTGGGTTAGGAGGTGTTGCAGCAGGTGTT…	MKLLYSKILLFALALNILLTSYYAHNKNKPYIIPRYTPTATSRVLSECDIHAPIYYNDEDMKSVKENFERQTSRRFEEYNERMNKNRQKCKEQRDKDIQKIILKDKIEKSLEEKVEKGCLRCACGLGGVAAGVGIIGAIAVNEWTKVATAAAVQKGIKAGIAKAIDDLGNIVGLIQFDLIDWAAKIDGINFLKQNSLVSIVNEVYYKCIDIENSSDFLFCSATKAWDQQKSTLGLQIISNQAAEAAVAAGKAAETAEKAEIVLVNAKSSLLYSAIGYSVIAILIIVLVMIIIYLILRYRRTKKMNKKAEYTKLLNK	316	3	HMM: MKLLYSKILLFALALNILLTSYYAH, NN: MKLLYSKILLFALALNILLTSYYAH	yes	GO_0016020	GO_0020002	GO_0016020,GO_0020002	0	0	0	0	0	0	0	0	0	0	0	0	0	0	0	0	0	0	0	0	0	0	0	0	0	0	0	0	0	0	0	0	0	0	0	0	0
5354	PF3D7_1479400	rifin	RIF	ATGAAACTGCACTACACTAAAATATTATTATTTTTCTTTCCATTAAATGTATTGTTAACATCATATCATGCACATAATAAAAATAAAGCATCCATCACACCACATCATACACGAAGTACTACGTCACGATTGTTAAGCGAATATGACACAGAATCGTCAATTTATGATAGTGATGAGGATATCAATTCAGTGAAGGAAATTTTCGAACGGCAAACATCACGACGTTTTGAAGAATACGAAGAACGTATGATAACACAACGACAAAAATATAAAGAACAACGTGACAAAGATATACAAAAAATTATTTTAAAAGATAAAATGGAGAAAAACTTAGCAAAAAAAATAGAAAAAGGTTGTCTTAGGTGTGGATTTGGGCTATCAGGTGTTGCAGGAAGTATT…	MKLHYTKILLFFFPLNVLLTSYHAHNKNKASITPHHTRSTTSRLLSEYDTESSIYDSDEDINSVKEIFERQTSRRFEEYEERMITQRQKYKEQRDKDIQKIILKDKMEKNLAKKIEKGCLRCGFGLSGVAGSIGLFGAVAINIWKPAALKAAIAKAITEGTADIAAAGVKAGEVTGKVLVISGLKRMGISTLDGKDLGTYFATTSYKNITNITQAVSSEYVQKCISASSGSVRFRLVDAQRDIHFCHSVWKQTSAVSTPKKGISYKEVIERTVETMVSKAEGPANTAAEIAEAANKLAIEEAQEKVMEATIYNWYTTIGYSILAILIIVLIMLIIYLILRYRRKKKMKKKAQYTKLLNE	359	2	HMM: MKLHYTKILLFFFPLNVLLTSYHAH, NN: MKLHYTKILLFFFPLNVLLTSYHAH	yes	GO_0016020	GO_0020002	GO_0016020,GO_0020002	0	0	0	0	0	0	0	0	0	0	0	0	0	0	0	0	0	0	0	0	0	0	0	0	0	0	0	0	0	0	0	0	0	0	0	0	0
5356	PF3D7_1479600	rifin	RIF	ATGAAAGTCCATTATTTTAATATATTATTATTTCCCTTTTCATTAAATATAATGTTGTTGTCATCACAGGTATATAATCAAAGGAACCATTACATAACACTTCATATGCCAAACACAGAATCAATAAAAAGACATAGATCTTTATGCGAATGCGACCTATATATGCCTAATTATGACAATGACCCACAAATGAAAGAAGTGATGGATAATTTCAATAAACAGACACAACAAAGATTTAATGAATATGACGACCGTATGAATGAAAAACGCCAAAAACGTAAAGAACAAAGAGATAAAAATATAGACGAAATTATTAAAAAAGATAGAATGGACAAATCATTAGCAGAAAAAGTAGAAAAATGTTGTCTTATATGTGGGTGTGGATTAGGAGGTGTAGCA…	MKVHYFNILLFPFSLNIMLLSSQVYNQRNHYITLHMPNTESIKRHRSLCECDLYMPNYDNDPQMKEVMDNFNKQTQQRFNEYDDRMNEKRQKRKEQRDKNIDEIIKKDRMDKSLAEKVEKCCLICGCGLGGVAASVGIFGTVAVKELTKAAITTATELAKEEAMVEGVAKGAAAGKEFVIAKLQEMGISTLRGNVFETLFTAQNYNNVKTIALAINTQYDASSCPIHGSGPSETFCALVNQKSVAALKVQRMTQGGAVSTYEVIETAVKPIVSEAETVAAAAAKKATEEAIKASTEAVESAYAACQTAIIASVVAILVIVLVMMIIYLILRYRRKKKMNKRAQYTKLLNQ	350	3	HMM: MKVHYFNILLFPFSLNIMLLSSQ, NN: MKVHYFNILLFPFSLNIMLLSSQ	yes	GO_0016020	GO_0020002	GO_0016020,GO_0020002	0	0	0	0	0	0	0	0	0	0	0	0	0	0	0	0	0	0	0	0	0	0	0	0	0	0	0	0	0	0	0	0	0	0	0	0	0
5358	PF3D7_1479800	rifin	RIF	ATGAAACTGAACTACACTAAAATATTATTATTTTTCTTTCCATTAAATATATTAGTAACATCATATCATGGAAATAATAATAATAAAACATACGTCACATCACATATACCAACTAATACATCACGACTGTTAAGCGAAAAGGACTTACAATCATCAATTTATGATAATGATCCCGATATGAAATCAGTGAAGGAAAATTTCGATCGACAAACATCACAACGTTTTGAAGAATACGAAGAACGTATGATCCCACAACGACAAAAATATAATGAACAACGTGACAAAGATATACAAAAAATTATTTTAAAAGATAAAATGGAAAAATCGTTAGAAGAAAAAGTAGAAAAAGGCTGTCTTAGGTGTGGGTTTGGGTTAGGAGGTGTTGCAGCAGGTGTTGGA…	MKLNYTKILLFFFPLNILVTSYHGNNNNKTYVTSHIPTNTSRLLSEKDLQSSIYDNDPDMKSVKENFDRQTSQRFEEYEERMIPQRQKYNEQRDKDIQKIILKDKMEKSLEEKVEKGCLRCGFGLGGVAAGVGIFGSIAVNELKKAAIAKAVVVAKEAAEKAGAAAAAEAGKNAVIAGLEEMGISTLRGNVFETLFTANTYPNASEIALAINEQYNPSSCILPIGGSGPSETFCTWVKVKSDAAPKIPGKVSSTYEVIETAVKSIVTDAKTVAETAAKKATEEAIKASTDAVESAYAACQTAIIASVVAILVIVLVMMIIYLILRYRRKKKMNKKLQYTKLLNQ	344	1	HMM: MKLNYTKILLFFFPLNILVTSY, NN: MKLNYTKILLFFFPLNILVTSYHGN	yes	GO_0016020	GO_0020002	GO_0016020,GO_0020002	0	0	0	0	0	0	0	0	0	0	0	0	0	0	0	0	0	0	0	0	0	0	0	0	0	0	0	0	0	0	0	0	0	0	0	0	0
4953	PF3D7_1437800	trafficking protein particle complex subunit 5, putative	TRAPPC5	ATGGATAAATCAAAAAGTTCCATAGAGAAAGAATTAAATAGGATAAAACAGGATGTGAGCTTAAGCGCATTTAGTATCCTCTTTAGTGAAATGGTACAATATTGTTTATATAAAAGTAAAAGAGGATATCGAATAGAAGATTGTTTACATGAAATGGGTTTACGTGTAGGTTATAAATTAAATGAATATTTAACATATAAGAATAAAGTGAAAAGAAGCATAAATATTATTAATATTTTAACATTCATATCTAAACATGTGTGGAAATATTTATTTCAGCATTCATCTGATTTACTTAAATCTCAAGATAGTATTTATGAGTATATGATATGTGATAAAAATATTTTATTAAATAAATTTATAAATGTACCAAAAGATTATGGAAATATAAATTGTGCT…	MDKSKSSIEKELNRIKQDVSLSAFSILFSEMVQYCLYKSKRGYRIEDCLHEMGLRVGYKLNEYLTYKNKVKRSINIINILTFISKHVWKYLFQHSSDLLKSQDSIYEYMICDKNILLNKFINVPKDYGNINCAAFAAGIVEGFLCSSEFQADVTAHTIHEGDDNYNTTIFIKFYPEVVEREKNH	184	0	null	no	GO_0030008	GO_0020002	GO_0030008,GO_0020002	0	0	0	0	0	0	0	0	0	0	0	0	0	0	0	0	0	0	0	0	0	0	0	0	0	0	0	0	0	0	0	0	0	0	0	0	0
4963	PF3D7_1439000	copper transporter	CTR1	ATGTGTAAGAATATATATTTCTATATTATTTTAATTTTAAAATTGTTCATTGTACTAGCTGACAAAAGCGACAATAGTATTTGTAAACCTTCTGTTAAAATATCATGTGCTCACAATTGTTGTAAGAATAAATTATCTTTTATGTATAATTGTTGGAAACACTATGATAAATATAGTAATATAATAAAAGATAATTTACAAAAAGAAGAAGATACAGTTGTTCAATTACAAGATCATGATAATATTGATATTGTCGAACATGTTGAAACTATGCCAATGTCCTTTCAGCTGACTACACACACAATTATTTTATTTAACAAATGGGAAACCAAATCGGCCCTCTCTTACTATATATCGTTGGTTTTATGTTTCTTCTTTGGTATAATATCAGTAGGATTT…	MCKNIYFYIILILKLFIVLADKSDNSICKPSVKISCAHNCCKNKLSFMYNCWKHYDKYSNIIKDNLQKEEDTVVQLQDHDNIDIVEHVETMPMSFQLTTHTIILFNKWETKSALSYYISLVLCFFFGIISVGFKVVRLNVEQALPKTEDTNIFKSLVLFKNNSYRMLLSFVIYSWDYLLMLIVMTFNVGLFVAVVLGLSFGFFIFGNKFVSSKKCSPDDLDVHKEFTADPACCGC	235	2	HMM: MCKNIYFYIILILKLFIVLAD, NN: MCKNIYFYIILILKLFIVLAD	yes	GO_0016021	GO_0020002, GO_0005886	GO_0016021,GO_0020002,GO_0005886	0	0	0	0	0	0	0	0	0	0	0	0	0	0	0	0	0	0	0	0	0	0	0	0	0	0	0	0	0	0	0	0	0	0	0	0	0
1	PF3D7_0100100	erythrocyte membrane protein 1, PfEMP1	VAR	ATGGTGACGCAAAGTAGTGGTGGGGGTGCTGCTGGTAGTAGTGGTGAGGAAGATGCCAAACATGTATTGGATGAATTTGGGCAACAAGTGTACAATGAAAAAGTGGAAAAGTATGCTAATTCTAAAATATATAAAGAGGCGTTGAAAGGAGATTTGTCACAAGCATCAATTTTGAGCGAATTAGCTGGCACCTATAAACCATGTGCCCTTGAATATGAATATTATAAGCATACTAATGGCGGTGGTAAGGGTAAAAGGTATCCGTGTACAGAGTTAGGTGAAAAAGTAGAACCACGTTTTTCGGATACACTTGGTGGTCAGTGTACTAACAAAAAAATAGAAGGTAATAAATATATTAAAGGTAAGGATGTTGGTGCTTGTGCACCATACCGACGTCTA…	MVTQSSGGGAAGSSGEEDAKHVLDEFGQQVYNEKVEKYANSKIYKEALKGDLSQASILSELAGTYKPCALEYEYYKHTNGGGKGKRYPCTELGEKVEPRFSDTLGGQCTNKKIEGNKYIKGKDVGACAPYRRLHLCSHNLESIQTNNYNSGNAKHNLLVDVCMAAKYEGDSIKNYYPKYQRTYPDTNSQLCTVLARSFADIGDIVRGKDLYLGNPQESTQRIILENNLKDIFAKIHSDVMSTSGSNGRALQKRYKDTDNYYELREDWWALNRDQVWKAITCNAGGGNRYFRQTCGSGEWAKDKCRCKDDKVPTYFDYVPQYLRWFEEWAEDFCRLRKHKLKDAKNKCRGDSGNDRYCDLNRYDCTQTIRGNEHFVEKDDCKGCQYSCAHFVNWIDNQKL…	2163	0	null	no	GO_0016021	GO_0020002, GO_0020030	GO_0016021,GO_0020002,GO_0020030	0	0	0	0	0	0	0	0	0	0	0	0	0	0	0	0	0	0	0	0	0	0	0	0	0	0	0	0	0	0	0	0	0	0	0	0	0
135	PF3D7_0115700	erythrocyte membrane protein 1, PfEMP1	VAR	ATGGTGACTGGTAGTGGTGGTGAGGATAAGTATAAAAGTGCCAAAAATGCCAAGGAACTTTTGGATATGATTGGGAAAGACGTGCACGAAATAGTGGAAAAGGATGAGGCTAAAAAATATATTGATGAATTGAAAGGAAATTTGCAGAAAGCAAAAGGTATTGGGGAATTAGCTGCCTTCCCAGATACATGCAAACGTGTAGAGCAATATCGTAGTAAGGCTAATGGTGATGGTAAAAGGTATCCGTGTACAGAGTTAAGTGAAAAATATGTAGAACGTTTTTCCAATACACTTGGTGGCCAATGCACTGATAGTAAGATGCGTAGGGATGGTATAGGAGCATGTGCACCATACCGACGTCTACATTTATGTCATCATAATTTGGAAAATATCAAGGAT…	MVTGSGGEDKYKSAKNAKELLDMIGKDVHEIVEKDEAKKYIDELKGNLQKAKGIGELAAFPDTCKRVEQYRSKANGDGKRYPCTELSEKYVERFSNTLGGQCTDSKMRRDGIGACAPYRRLHLCHHNLENIKDVNNIDNDTLLAEVCMAAYYEGESLTRYNPIYQTKYKDSGSTMCTELARSFADIGDIVRGRDLFRGNDEEKKKRDELEKNLKTIFGKIHSRLTKDAQNYYEDNDTDKNYYQLREDWWKVNRDQVWEAITCEAKSDDKYNVIGPDGKITESNKGQCRCFSGDPPTNMDYVPQFLRWFEEWAEDFCRLRKHKLKDAIDKCRTPKGKEKYCDLNRYDCEQTIRGDHDFVEDDVCKGCQYSCSHFVNWIDNQKLEFDKQKRKYKSEIKKYK…	2203	0	null	no	GO_0016021	GO_0020002, GO_0020030	GO_0016021,GO_0020002,GO_0020030	0	0	0	0	0	0	0	0	0	0	0	0	0	0	0	0	0	0	0	0	0	0	0	0	0	0	0	0	0	0	0	0	0	0	0	0	0
136	PF3D7_0200100	erythrocyte membrane protein 1, PfEMP1	VAR	ATGGCGACTGGTAGTGGGGGCGATAGTTCACGGGATGAAAGTGTCAAAGATTTATTTGATAGAATAGGGAAGAAAGTTTACGAAAAAACAGAAAAGATTGCAAAACGATATACTACTGAATTGCATGGTGATTTGTCAAAAGCAACATATCCAAATGATAAACATCCTGAAGGATCAACAGAAAATAATCCATGCAAACTTCAATATGATTATAATACTAATGTTACTCATGGTTTTGGTCAAGAGTATCCTTGTGAAACGGACATAGTAGAACGTTTTTCTGATACAGAAGGAGCACAATGTGATAAGAAAAAAATAAAAGATAATAGTGAAGGAGCTTGCGCTCCATATAGACGATTACATGTATGCGTTAGAAATTTGGAAAATATCAATGATTAT…	MATGSGGDSSRDESVKDLFDRIGKKVYEKTEKIAKRYTTELHGDLSKATYPNDKHPEGSTENNPCKLQYDYNTNVTHGFGQEYPCETDIVERFSDTEGAQCDKKKIKDNSEGACAPYRRLHVCVRNLENINDYSKINNKHNLLVEVCLAAKYEGESITGRYPQHQETNPDTKSQLCTVLARSFADIGDIIRGKDLYRGGNTKEKKKRKKLEENLKTIFGHIYDELKNGKTNGEEELQKRYRGDKDNDFYQLREDWWDANRETVWKAITCNAGSYQYSQPTCGRGEIPYVTLSKCQCIAGEVPTYFDYVPQYLRWFEEWAEDFCRKKKKKIPNVKTNCRQVQRGKEKYCDRDGYNCDGTIRKQYIYRLDTDCTKCSLACKTFAEWIDNQKEQFDKQKQKY…	1711	0	null	no	GO_0016021	GO_0020002, GO_0020030	GO_0016021,GO_0020002,GO_0020030	0	0	0	0	0	0	0	0	0	0	0	0	0	0	0	0	0	0	0	0	0	0	0	0	0	0	0	0	0	0	0	0	0	0	0	0	0
356	PF3D7_0223500	erythrocyte membrane protein 1, PfEMP1	VAR	ATGGGGAGTGGTAAGGGCGGTGATCCGCAGGATGAAAGTGTCAAACATATGTTTGATAGGATAGGAGAAGATGTGTACGAGCAAGTGAAAAGTGAAACTGTAAATTATGTTAGTGAATTGGAAGGAAAGTTGTCACTAGCACCAATTTTGGGTGTGGAATCAGGTAGCACCAATGAAACATGCAACCTTGTACAGGATTATTATAATAAGCCTGTTTATGGTAACAGTAACAGGTATCCGTGCAAAAATTTAAAAGGAATTACAAATGAAGAACGTTTTTCGGATACACTTGGTGGCCAGTGTACTAACAAAAAAATAAAAGGTAATGAATATAGTACTAAAAGTGGTAAAGATTGTGGAGCATGTGCACCATACCGACGTCTACATTTATGTAGTCAT…	MGSGKGGDPQDESVKHMFDRIGEDVYEQVKSETVNYVSELEGKLSLAPILGVESGSTNETCNLVQDYYNKPVYGNSNRYPCKNLKGITNEERFSDTLGGQCTNKKIKGNEYSTKSGKDCGACAPYRRLHLCSHNLESIDTTSMTHKLLLEVCMAAKYEGNSIDTHYPQHQRTNEDSPSQICTMLARSFADIGDIVRGKDLFYGNSKEKEKRDELETNLKTIFGKIHEKLKDKEGAETRYGSDTTNYYQLREDWWYANRATVWEAITCDVHGSDYFRQTCGDKETTATRVKDKCRCKDENGKKPGSNADQVPTYFDYVPQYLRWFEEWAEDFCRKKKKKLEKLEQQCRDYKQNLYCSGNGYDCTKTIYKKGKLVIGEHCTNCSVWCRLYESWIDNQKLEF…	2177	0	null	no	GO_0016021	GO_0020002, GO_0020030	GO_0016021,GO_0020002,GO_0020030	0	0	0	0	0	0	0	0	0	0	0	0	0	0	0	0	0	0	0	0	0	0	0	0	0	0	0	0	0	0	0	0	0	0	0	0	0
600	PF3D7_0400100	erythrocyte membrane protein 1, PfEMP1	VAR	ATGGTGAGGACAGGAGGTAGCGGTGGTGGAGGTGTTGATAAGGATGGTATTGACCACCAAAGTGCCAAACATTTATTGGATAGTATAGGGAAAAAAGTACACGACCAAGTGAAAAATGGTGCTGATGGTACTGGTGCTAGTGGTGATGCTAAAAATTATATTGATGATTTGAAAGGAGATTTGCAGAAAGCACCAAATATTAACCCGAAATTAATTGGCACCGATGATCCATGCAAACTTGTAGAGGATTATTATAATAACCATGTTAATGGCGATGGTAAGGGTGAAAGGTATCCGTGTACAGAGTTAAGTGGAAAAAAGTTTCAAAACCCTTTTTCGGATACACTTGGTGGTCAGTGTACTAATAGTAAAATGCGTAGTGGTTGTGAAGGAGCTTGC…	MVRTGGSGGGGVDKDGIDHQSAKHLLDSIGKKVHDQVKNGADGTGASGDAKNYIDDLKGDLQKAPNINPKLIGTDDPCKLVEDYYNNHVNGDGKGERYPCTELSGKKFQNPFSDTLGGQCTNSKMRSGCEGACAPYRRLHLCHHNLESIETTSKTASDTLLLEVCMAAKYEGQSINTHYTKHEHSNKDSPSQLCTVLARSFADIGDIVRGKDLFYGNTYESARREKLENKLKEVFGKIHGGLSEEAKKKYQDGDGNYYQLREDWWTANRETVWKAITCEVKSGNNYFRATCGDEKNPSLTSKQCRCDKDKAGKPIKGSGNVNIVPTYFDYVPQYLRWFEEWAEDFCRLRKHKLKDAIKKCRGKNGEEKYCDLNRYDCKNTASGKHVFFEDFDCKDCQYS…	2646	0	null	no	GO_0016021	GO_0020002, GO_0020030	GO_0016021,GO_0020002,GO_0020030	0	0	0	0	0	0	0	0	0	0	0	0	0	0	0	0	0	0	0	0	0	0	0	0	0	0	0	0	0	0	0	0	0	0	0	0	0
602	PF3D7_0400400	erythrocyte membrane protein 1, PfEMP1	VAR	ATGGGGACAGGTTCATCAACTCCTTCGGTTCCAAAAGATGTTAAAAATGAAAGTCACAACAGTGCCAGAAATGTTTTGGAAAATATTGGAATAGAAATATATAATGAGGAAAAAAAAAAAGTGAATGGATATACAAGTCAATTGAGAGGCGATTTATCAAGAGCACGATTTCATGATGGCTTGCGCAAGGCAGCTCGTTTGGGGGTAATACCTGGTCCTGCAAATTCATGCGATCTTGACCACAAATTCTATACTAATATAAATAATGGATATCCCCCCGCAAGAAATCCTTGCGATCTTAGAAATCAAAATCGTTTTGGTGAAAATGCCGAAGCGTATTGTAATAGTGATAAAATAAGGGTTACTGGAAAAAAAAGTGCTGGTGGAGCATGTGCACCA…	MGTGSSTPSVPKDVKNESHNSARNVLENIGIEIYNEEKKKVNGYTSQLRGDLSRARFHDGLRKAARLGVIPGPANSCDLDHKFYTNINNGYPPARNPCDLRNQNRFGENAEAYCNSDKIRVTGKKSAGGACAPFRRQNMCDKNLEYLDNTNTDDTDDLLGNVLVTAKYEGESIVAKHPHKENSEVCTALARSFADIGDIVRGKDMFKRNEEDAVQKGLRAVFKKINDNLKEKEISDYDNDPNYYKLREDWWTANRDQVWRAITCYIPYYVNYFKKTSDDTIVFTNDGKCGHYEGAPPTNLDYVPQFLRWFDEWAEEFCRIRNHKLRKIKDACRNDKERLYCSQNGYDCTKRIEKGSSCSRENKCTGCSNKCVDYDFWLEKQQNEFKIQKDKYDKEIETY…	3467	0	null	no	GO_0016021	GO_0020002, GO_0020030	GO_0016021,GO_0020002,GO_0020030	0	0	0	0	0	0	0	0	0	0	0	0	0	0	0	0	0	0	0	0	0	0	0	0	0	0	0	0	0	0	0	0	0	0	0	0	0
711	PF3D7_0412400	erythrocyte membrane protein 1, PfEMP1	VAR	ATGGCGCCAGGTAGTACTGGTACGCAGGATGATGATGCCAAAAATATGTTTGATAGGATAGGGCAACAAGTGTACGACGAAATAATGAAAAAGGATGATGCTGATGCTAAAAAATATATTAAGGAATTGAAAGGAAAGTTGTCATTTGCATCAATTTTGGGGGAATCAGCTGGCACCGATGATCCATGCCAACTTGAAAGTAAATATACTGAACTTATTAGTGGTAGTGGTAGTGGTGTTGCTGCTCGCGGTCATCCGTGCGGAAACGTAAGTGGAAAAGGAGAAGATGTAAGCCGTTTTTCTAAAGAACGTGTCTCTAAATATGATGAGAAAAAAATAGGATGTAGTAATAGTGAAGGAGCGTGTGCTCCATATAGACGATTATCTCTATGTAACAAA…	MAPGSTGTQDDDAKNMFDRIGQQVYDEIMKKDDADAKKYIKELKGKLSFASILGESAGTDDPCQLESKYTELISGSGSGVAARGHPCGNVSGKGEDVSRFSKERVSKYDEKKIGCSNSEGACAPYRRLSLCNKNFQKINNYSSKAKHNLLLDVCLAANHEGQSIKTHLKQYDAEYPSGSGHTTCTALARSFADIGDIIRGKDLYRRDKGEKKKLEEHLKTIFGKIHSDVTSSGSNKEALQERYNGDKENYYKLREDWWTANRETVWEAITCDDDDKLANASYFRATCSDSDGKGSFSQANDKCRCKDKKGKNTDQVPTYFDYVPQYLRWFEEWAEDFCRKKKKYVNIVKTYCRKKDNSSEERYCSRNGFDCEKTKRAIGKLRYGKGCTDCFFACYPYEK…	2209	0	null	no	GO_0016021	GO_0020002, GO_0020030	GO_0016021,GO_0020002,GO_0020030	0	0	0	0	0	0	0	0	0	0	0	0	0	0	0	0	0	0	0	0	0	0	0	0	0	0	0	0	0	0	0	0	0	0	0	0	0
712	PF3D7_0412700	erythrocyte membrane protein 1, PfEMP1	VAR	ATGGGTCCCCCGTCGACTGCGCCTGACTATAGTAGTGCCAAAGATGCAAAGGATCTTTTGGATATGATTGGGAAAGACGTGCACGACCAAGTGGAAAAGGAAGCTGCAGGACGTGGTGGGAGTGAGTTAAAAGGATTGTTGTCACTAGCAAAAGGTTCTGGTGTGGAATTAGCTGCCTTCCCAGAACCGTGCGGTCTTATAAAAGATAAAGGTGATGAACTTCTTGGTGATAGCGGTGAAAGGCATCCGTGCGGAAATACAACAGGAAAAGAAGATGTAGACCGTTTTTCGGTTAAACAACAAGCAGAATATGATAACAAAAAAATGAAATGTAGTTATGGTAGTAATGGTACGGATGTTGGCGCCTGTGCACCATATAGACGATTATTTCTATGTAAC…	MGPPSTAPDYSSAKDAKDLLDMIGKDVHDQVEKEAAGRGGSELKGLLSLAKGSGVELAAFPEPCGLIKDKGDELLGDSGERHPCGNTTGKEDVDRFSVKQQAEYDNKKMKCSYGSNGTDVGACAPYRRLFLCNKNMEKMGRTSTTKHDLLLDVCMAANYEAQSLIRYHDKHQLTNEGSQICTVLARSFADIGDIIRGKDLYLGKKKKKKTETERDQLESKLKKIFGDIYNELTNGRNGVKDHYQDDNGGNYFQLREDWWTANRATVWKAITCKADTGNAYFRPTCSDSDGKGSFSQANDKCRCKDKKGKNTDQVPTYFDYVPQYLRWFEEWAEDFCRKKKIYVGIVKTYCREKYKSGNEPRYCSRNGYDCTKTKRAIGKYRMGNQCISCLYACNPYVDW…	2277	0	null	no	GO_0016021	GO_0020002, GO_0020030	GO_0016021,GO_0020002,GO_0020030	0	0	0	0	0	0	0	0	0	0	0	0	0	0	0	0	0	0	0	0	0	0	0	0	0	0	0	0	0	0	0	0	0	0	0	0	0
713	PF3D7_0412900	erythrocyte membrane protein 1, PfEMP1	VAR	ATGGGTCCCCCGTCGACTGCGCCTGACTATAGTAGTGCCAAACATGCATTGGATAGCATAGGGAAAAGAGTACATGCCCAAGTACAAAATGAAGCTAAACAACGGAGTAATGGTGATTTGAAAGGATTGTTAACCAGTGCAACACTTTCTGGTGGGGAATCAGCATTCACCGAAAATCCATGCGAGCTTATAAAAGATAAAGGTGATGAACTTCTTGGTGATAGCGGTGAAAGGCATCCGTGCGGAAATGGAAGTGCAAGTGAAAAACGTTTTTCTGAAGTAAGTGGCGGTGAATGTGATGATAAGAAAATAGAAGGTAATGGTCGTAATAATGGTGGAGCCTGTGCTCCATATAGACGATTATTTCTATGTAACAAAAATATGGAAAAAATGGGCAGA…	MGPPSTAPDYSSAKHALDSIGKRVHAQVQNEAKQRSNGDLKGLLTSATLSGGESAFTENPCELIKDKGDELLGDSGERHPCGNGSASEKRFSEVSGGECDDKKIEGNGRNNGGACAPYRRLFLCNKNMEKMGRTSTTKHDLLLDVCMAANYEAQSLIRYHDQYDATYPGSDFSMCTMLARSFADIGDIIRGKDLYLGKKKKKKTETERDQLESKLKKIFGDIYNELTNGRNGVKDHYQDDNGGNYFQLREDWWTANRATVWKAITCKADTGNAYFRPTCSNRQGPSQAHHYCRCNGDKPDDDKPNTDPPTYFDYVPQYLRWFEEWAEDFCRKKKIYVGIVKTYCREKYKSGNEPRYCSRNGYDCTKTKRAIGKYRMGNQCISCLYACNPYVDWINNQKE…	2312	0	null	no	GO_0016021	GO_0020002, GO_0020030	GO_0016021,GO_0020002,GO_0020030	0	0	0	0	0	0	0	0	0	0	0	0	0	0	0	0	0	0	0	0	0	0	0	0	0	0	0	0	0	0	0	0	0	0	0	0	0
714	PF3D7_0413100	erythrocyte membrane protein 1, PfEMP1	VAR	ATGGCGCCCACAAGTGGTGGTGGTGGTACGAAGGATGAAAGTGCCAAACATGCATTGGATAGCATAGGGAAAAGAGTACATGCCCAAGTACAAAATGAAGCTAAACAACGGAGTAATGGTGATTTGAAAGGATTGTTAACCAGTGCAACACTTTCTGGTGGGGAATCAGCATTCACCGAAAATCCATGCGAGCTTATAAAAGAAAAACGTGAGAAACTTCTTGGTGCTCGCGGTGAAAGGAATCCGTGCGGAAATGGAAGTGCAAGTGAAAAACGTTTTTCTGAAGTAAGTGGCGGTGAATGTGATGATAAGAAAATAGAAGGTAATGGTCGTAATAATGGTGGAGCCTGTGCTCCATATAGAAGGTTATCTCTATGTAACAAAAATTTTCAAAAAATC…	MAPTSGGGGTKDESAKHALDSIGKRVHAQVQNEAKQRSNGDLKGLLTSATLSGGESAFTENPCELIKEKREKLLGARGERNPCGNGSASEKRFSEVSGGECDDKKIEGNGRNNGGACAPYRRLSLCNKNFQKINNYDSSKAKHNLLVDVCMAANYEAQSLIPYHDQYDATYPGSDFSMCTMLARSFADIGDIIRGKDLYRGKKKKKQNGKETETERDQLESKLKEIFGDIYNELTNGRNGVKDHYQDTTDYFQLREDWWTANRHTVWKAITCGTHEGDTYFRPTCSNRQGPSQAHHYCRCNGDKPDDDKPNTDPPTYFDYVPQYLRWFEEWAEDFCRKKKKYVDIVKKYCRGVYNDVPRYCSRNGYDCEQTIYKKGYFVIDKGCINCLYACNPYVEWIE…	2326	0	null	no	GO_0016021	GO_0020002, GO_0020030	GO_0016021,GO_0020002,GO_0020030	0	0	0	0	0	0	0	0	0	0	0	0	0	0	0	0	0	0	0	0	0	0	0	0	0	0	0	0	0	0	0	0	0	0	0	0	0
790	PF3D7_0420700	erythrocyte membrane protein 1, PfEMP1	VAR	ATGGTGCCGCCAGGAGGTCGTCAGGGTGGGAGTGGTGAGGATGGTATTGATGATAAAGATGCCAAACATTTATTGGATAGCATAGGGAAAATAGTGCATGAGCAAGTGAAAAATGATGCTAAAACATATAAAGGTGAATTGGAAGGAAAGTTGTCACTAGCAACTACTATTGGGGAATTAAATTACACCAAAGATCCATGCATATTTGATTATAGTAAACTTATTAATGGTAGTGGTAGTGGTGGTGTTACTGCTCGCGATGATCCGTGCGGAAATGGAAGTGGAAAAGGAGAAGATGTAAGCCGTTTTTCCGATAAAGAAGGAGCACAATGTGCTAATAGTAAAATACATGGTAATAGTAAAGGTAGTAATGGTGGAGCCTGTGCTCCACTCAGACGA…	MVPPGGRQGGSGEDGIDDKDAKHLLDSIGKIVHEQVKNDAKTYKGELEGKLSLATTIGELNYTKDPCIFDYSKLINGSGSGGVTARDDPCGNGSGKGEDVSRFSDKEGAQCANSKIHGNSKGSNGGACAPLRRLHLCNKNMEKIATSTAKHDLLVDVCMAANYEAQSLIRDHPQHKRTNPDSKICTELARSFADIGDIVRGRDLYRGNKKENKQREKLEENLRKIFENIYEGLSNNGVKARYEGDKENFYQLREDWWALNRDQVWKALTCSDDLKDASYFRPTCSDRKGSCSQAKDNCRCDGSNTDQVPTYFDYVPQFLRWFEEWAEDFCRKKKKKLEKLEQQCRGVYEGKERYCSRNGFDCEKTVNARGKVRMGKGCTDCFFACNPYIDWIEKQKEQF…	2152	0	null	no	GO_0016021	GO_0020002, GO_0020030	GO_0016021,GO_0020002,GO_0020030	0	0	0	0	0	0	0	0	0	0	0	0	0	0	0	0	0	0	0	0	0	0	0	0	0	0	0	0	0	0	0	0	0	0	0	0	0
791	PF3D7_0420900	erythrocyte membrane protein 1, PfEMP1	VAR	ATGGTGCCGCCAGGAGGTCGTCAGGGTGGGAGTGGTGAGGATGGTATTGATGATAAAGATGCCAAACATTTATTGGATAGCATAGGGAAAATAGTGCATGAGCAAGTGAAAAATGATGCTAAAACATATAAAGGTGAATTGGAAGGAAAGTTGTCACTAGCAACTACTATTGGGGAATTAAATTACACCAAAGATCCATGCATATTTGATTATAGTAAACTTATTAATGGTAGTGGTAGTGGTGGTGTTACTGCTCGCGATGATCCGTGCGGAAATGGAAGTGGAAAAGGAGAAGATGTAAGCCGTTTTTCCGATAAAGAAGGAGCACAATGTGCTAATAGTAAAATACATGGTAATAGTAAAGGTAGTAATGGTGGAGCCTGTGCTCCACTCAGACGA…	MVPPGGRQGGSGEDGIDDKDAKHLLDSIGKIVHEQVKNDAKTYKGELEGKLSLATTIGELNYTKDPCIFDYSKLINGSGSGGVTARDDPCGNGSGKGEDVSRFSDKEGAQCANSKIHGNSKGSNGGACAPLRRLHLCNKNMEKIATSTAKHDLLVDVCMAANYEAQSLIRDHPQHKRTNPDSKICTELARSFADIGDIVRGRDLYRGNKKENKQREKLEENLRKIFENIYEGLSNNGVKARYEGDKENFYQLREDWWALNRDQVWKALTCSDDLKDASYFRPTCSDRKGSCSQAKDNCRCDGSNTDQVPTYFDYVPQFLRWFEEWAEDFCRKKKKKLEKLEQQCRGVYEGKERYCSRNGFDCEKTVNARGKVRMGKGCTDCFFACNPYIDWIEKQKEQF…	2201	0	null	no	GO_0016021	GO_0020002, GO_0020030	GO_0016021,GO_0020002,GO_0020030	0	0	0	0	0	0	0	0	0	0	0	0	0	0	0	0	0	0	0	0	0	0	0	0	0	0	0	0	0	0	0	0	0	0	0	0	0
792	PF3D7_0421100	erythrocyte membrane protein 1, PfEMP1	VAR	ATGGTGGCGCGAGGAGGTCATCAGGGCGGGGAAGATATTGATGAAACAAGTGCCAAACATTTATTGGATAGCATAGGGGAAAAAGTGTACAAAAAAGTGCATGGTGCTGCTCTACAACGTAGTAATGGTGCGTTGCAAGGAATTTTGTCACTAGCAACATTTGAGAAAAAACCAGAGACTCAACAAACACCAAAAGATCCATGCGACCTTAATCATAAATATCATACTACTGTTACCAGTGGTTATGATAAAGAAAATCCTTGTAAGGATAGACCAGAAGTTCGATTTTCTTATACAGAAGGAGCAGAATGTAATAAGAGCAAAGTAAAGGGTAATGAAGGTAATAGTGAAGGTGCATGTGCTCCATATAGACGATTGCATGTATGCGATCAAAATTTA…	MVARGGHQGGEDIDETSAKHLLDSIGEKVYKKVHGAALQRSNGALQGILSLATFEKKPETQQTPKDPCDLNHKYHTTVTSGYDKENPCKDRPEVRFSYTEGAECNKSKVKGNEGNSEGACAPYRRLHVCDQNLELIKPKNITTHNLLVDVCLAAKFEAESLKTYRGKYQLTNHGFHTNICTELARSFADIGDIIRGKDLYRGNNKEKDRLEDNLKKIFKQLYEELTKNNKNEAIKTHYQDDDPNYYKLRNAWWEANRQEVWKAITCGAGGSKYFRHTCGTGTPTDDKCRCAINDVPTYFDYVPQYLRWFEEWAEDFCRKRKHKLKDVKTNCRGENGTDRYCSGNGLDCTKTIRAKYIYAIGSECTKCSFLCGFYKKWIDNQKKEFLKQKKKCENEMLSK…	2181	0	null	no	GO_0016021	GO_0020002, GO_0020030	GO_0016021,GO_0020002,GO_0020030	0	0	0	0	0	0	0	0	0	0	0	0	0	0	0	0	0	0	0	0	0	0	0	0	0	0	0	0	0	0	0	0	0	0	0	0	0
794	PF3D7_0421300	erythrocyte membrane protein 1, PfEMP1	VAR	ATGGCGCCGCAAAGTAGTGGGGGTAGTGAGGAGGATGATATTGACCACAAAAGTGTGAAACATTTATTGGATAGCATAGGGAAAAAAGTACACGACAAAGTGAAAAGTGAAGCTAACCAATATAAAGATGACTTGAAAGGAAATTTGCAGCATGCAAAAGATATGGGGGAAAGAGCTAGCAGCAATAAAACATGCGACCTTGTAAAAGAATATTATGAGCACTTTAATGGTGATGCTAGCGATAAAAGGCAGCCGTGCAAAAAAGACACAAACGGAAACGATGTAGAGCGTTTTTCGGTTAAACAACAAGCAGAATATGATAACAAAAAAATGAAATGTAGTAATGGTAGTAATGGTAAAAATGAAGGAGCATGTGCGTCGTTTCGACGATTAAATTTA…	MAPQSSGGSEEDDIDHKSVKHLLDSIGKKVHDKVKSEANQYKDDLKGNLQHAKDMGERASSNKTCDLVKEYYEHFNGDASDKRQPCKKDTNGNDVERFSVKQQAEYDNKKMKCSNGSNGKNEGACASFRRLNLCNKNMENMDTNNNDGKAKHNLLAEVCLAAKYEGDSLKHYSKKLNLTYTDSPSQLCTELARSFADIGDIVRGKDLFLGHKQRKKELEKRLVEMFKNIQGNNSKLRTLSLNHVREYWWALNRDQVWKAITCDADTGNAYFRTTCSDSHRSGTFSQAKDKCRCKDENGKNETDQVPTYFDYVPQFLRWFEEWAEDFCRKKKKYVDIVKTYCREKDKYGNERYCSGNGYDCTKTIYKKGRIVVGYECTSCSVWCRMYEKWIDNQKKEFLK…	2193	0	null	no	GO_0016021	GO_0020002, GO_0020030	GO_0016021,GO_0020002,GO_0020030	0	0	0	0	0	0	0	0	0	0	0	0	0	0	0	0	0	0	0	0	0	0	0	0	0	0	0	0	0	0	0	0	0	0	0	0	0
832	PF3D7_0425800	erythrocyte membrane protein 1, PfEMP1	VAR	ATGGGGAATGCATCATCATCAGAGGGGGAGGCTAAAACCCCTAGTTTAACAGAAAGTCACAACAGTGCAAGAAATATTTTGGAAGGTTATGCCGAAAGTATAAAGGAACAGGCATCAAAAGATGCAAAAATACATGGACATCATTTGAAAGGAGATTTGGCGAAAGCAGTATTTCGTCATCCATTTTCTGCATATAGACCTAACTATGGAAATCCGTGCGAACTTGATTATAGGTTTCATACTAATGTATGGCATCGTAACGCAGAAGATAGAAATCCTTGTCTTTTTAGTCGTGCAAAACGTTTTTCAAATGAAGGTGAAGCAGAATGTAATGGTGGTATAATAACTGGTAATAAAGGTGAATGTGGGGCATGTGCACCGTATAGGAGAAGACATATA…	MGNASSSEGEAKTPSLTESHNSARNILEGYAESIKEQASKDAKIHGHHLKGDLAKAVFRHPFSAYRPNYGNPCELDYRFHTNVWHRNAEDRNPCLFSRAKRFSNEGEAECNGGIITGNKGECGACAPYRRRHICDYNLHHINENNIRNTHDLLGNLLVMARSEGESIVKSHEYTGYGIYKSGICTSLARSFADIGDIIRGKDLYRRDSRTDKLEENLRKIFANIYKELKNGKKWAEAKEYYQDDGTGNYYKLREAWWALNRKDVWKALTCSAPRDAQYFIKSSVRDQTFSNDYCGHGEHEVLTNLDYVPQFLRWFEEWAEEFCRIKKIKLGKVKEACRDDSKKLYCSHNGYDCTKTIRNKDILSDNPKCTGCSVKCKVYELWLRNQRNEFEKQKKKYYK…	3553	1	null	no	GO_0016021	GO_0020002, GO_0020030	GO_0016021,GO_0020002,GO_0020030	0	0	0	0	0	0	0	0	0	0	0	0	0	0	0	0	0	0	0	0	0	0	0	0	0	0	0	0	0	0	0	0	0	0	0	0	0
834	PF3D7_0426000	erythrocyte membrane protein 1, PfEMP1	VAR	ATGGCGCAGAAAGTTGGTGGGGGTGGTAAGGATGACTATAAGGATGCAAAGGACCTTTTGGATAAAATTGGGCAACAAGTGCACGACAAAGTGAAAAATGGTGATGCTGAAACATATAAAGGGGCGTTGAAAGGAAATTTGTCATTTGCAACTGCTAGTGGAGAAACAGGTGGCACCAATAAACCATGCGATTTTGGATATGATAAACTTATTAGTGGTAGGGGTGGTGTTACTGCTCGCGGTGATCCGTGCGGAAAGGATGGAACAGGAAAAGAACATCGTTTTTCTAAAGAACGTGGCGCTGAATGTGATAAGAACAAAATAAGTGGTAGTAATGATAATGAAGGAGCGTGTGCTCCATATAGACGGTTATCTCTATGTAACAAAAATTTTCCAAAT…	MAQKVGGGGKDDYKDAKDLLDKIGQQVHDKVKNGDAETYKGALKGNLSFATASGETGGTNKPCDFGYDKLISGRGGVTARGDPCGKDGTGKEHRFSKERGAECDKNKISGSNDNEGACAPYRRLSLCNKNFPNMNSKDSLKAKNDLLADVCLAAKHEGNSINTHYQKYQAQYASSASSSQICTMLARSFADIGDIVRGKDLYSGNKKKKQTEREKLENNLKTIFGKIHSDVTKSGNNKDALQERYQKDEKDGNFFQLREDWWYANRATIWEALTCNAQGNTYFRQTACAGRSATRNQCRCDGANIVPTYFDYVPQYLRWFEEWAEDFCRKRKYKLENAKEQCREKDKYYQERYCSGNGYDCTQTVRAQEEYSMENNCHKCFFACNPFVKWLGNQKLEFD…	2149	0	null	no	GO_0016021	GO_0020002, GO_0020030	GO_0016021,GO_0020002,GO_0020030	0	0	0	0	0	0	0	0	0	0	0	0	0	0	0	0	0	0	0	0	0	0	0	0	0	0	0	0	0	0	0	0	0	0	0	0	0
835	PF3D7_0500100	erythrocyte membrane protein 1, PfEMP1	VAR	ATGGGGCCGCCAGGTATTACTGGTACGCAGGGTGAAACTGCCAAACATATGTTTGATAGGATAGGGAAACAAGTGTACGAAACAGTGAAAAATGAAGCTGAAAATTATATTAGTGAATTGGAAGGAAAGTTGTCACAAGCAACACTTTTGGGGGAAAGAGTTAGCAGCCTTAAAACATGCCAACTTGTAGAGGATTATCGTAGTAAGGCTAATGGTGATGTTAAAAGGTATCCGTGCGCTAATAGATCACCAGTTCGTTTTTCCGATGAAAGTCGAAGTCAATGTACATATAATAGAATAAAAGATAATGAAACCGATGATAATGCATGTGGCGCCTGCGCGCCGTATCGACGTTTACATTTATGTGATTATAATTTGGAAAAAATGGGCAAAACGTCG…	MGPPGITGTQGETAKHMFDRIGKQVYETVKNEAENYISELEGKLSQATLLGERVSSLKTCQLVEDYRSKANGDVKRYPCANRSPVRFSDESRSQCTYNRIKDNETDDNACGACAPYRRLHLCDYNLEKMGKTSTTKHDLLAEVCMAAKYEGDSIKTHYTIHKHTNNDSAAELCTELARSFADIGDIIRGKDLYLGDIKKKQNGKKTEREKLEENLKRIFGKIHEDVTNGKKEVLKTRYKDINDPEFFKLREDWWTANRATVWKAITCHAGESDKYFRNTCNDSEHSGTFSQPNKYCRCNGDKPGEDKANVDPPTYFDYVPQYLRWFEEWAEDFCRIRKHKLKNAKEQCREKYKSGTDRYCSRNGYDCTQTIRGRNILVSDSECTNCSVVCTPFVKWIEN…	2207	0	null	no	GO_0016021	GO_0020002, GO_0020030	GO_0016021,GO_0020002,GO_0020030	0	0	0	0	0	0	0	0	0	0	0	0	0	0	0	0	0	0	0	0	0	0	0	0	0	0	0	0	0	0	0	0	0	0	0	0	0
1148	PF3D7_0600200	erythrocyte membrane protein 1, PfEMP1	VAR	ATGGCGCCGCAACGTGCCGAAGATTCTAACAAGAGTGCCAAGGAAGTATTGGATGAATTTGGGCAACAAGTGTACAAAGAAAAAGTGGAAAAGGATGCTAAAATATATAAAGGTGAATTGGAAGGAAATTTGGCAAGCTCATCAATTTTGGGGGAAACAGCGAGCACCGATAAACCGTGCACATTTGAATATAATAAACTTCTTGGTGCTCGCGGTAAAAGGCATCCGTGCGGAAATAGACAAACAGTTCGTTTTTCCGATGAATATGGAGGTCAATGTACATTTAATAGAATAAAAGATAGTGAACATAATAATAATGATGTTGGGGCCTGTGCTCCTTTCAGACGATTACATCTATGTGATTATAATTTGGAAAAAATGGGCTCAACGAAAATCAAG…	MAPQRAEDSNKSAKEVLDEFGQQVYKEKVEKDAKIYKGELEGNLASSSILGETASTDKPCTFEYNKLLGARGKRHPCGNRQTVRFSDEYGGQCTFNRIKDSEHNNNDVGACAPFRRLHLCDYNLEKMGSTKIKDKNVLLAEVCMAAKYEGQSLLKQYEEHKNNYPHTNICTVLARSFADIGDIVRGKDLFLGHQQRKRKLEENLKQMFENIKKNNDKLDKISIEQVREYWWNANRDQVWEAITCHAAHSDEYFRKSTDGVTLYFDGRCGRELSSVPTYLDYVPQFLRWFDEWSEEFCRKRNITLKSAKEECQNDSKKLYCSLNGYNCTRLIPNKNYCSRDPICTPCSNKCIPYDLWLRNRRDEFNMQKGKYENEIKTYESDNDISNSNINTEYYKSFYK…	2879	0	null	no	GO_0016021	GO_0020002, GO_0020030	GO_0016021,GO_0020002,GO_0020030	0	0	0	0	0	0	0	0	0	0	0	0	0	0	0	0	0	0	0	0	0	0	0	0	0	0	0	0	0	0	0	0	0	0	0	0	0
1317	PF3D7_0617400	erythrocyte membrane protein 1, PfEMP1	VAR	ATGGGTCCCGCGCCTAGGACAGCAACCACTACATACAGTAGTGCCAAGGACCTTTTGGAAGACATTGGAGAAAGTGTGCAGAAAGAAGCAAAAAAGCAAGCTCTTGGACGTAGTGAGAGTGTTTTGCATGGCTTGTTGTCAAATGCAACAATTAAAGGTGTGAAAAACAAAGCCACAAAACCAATCCAACTTGAATATGAATATCACACTAACGTTACCGGTGGTTTTGATAAAAATAATCCTTGCGCAAATAGGTTGGACGTCCGATTTTCCGATATATATGGAGGTCAATGTACTGATAATAAAATAAATGGAAATGATGATGAAACTGGTGGAACGTGTGCTCCATTAAGGAGGTTATTTCTATGTGATCAGCATTTGTCGCACATGAAGGAAGGT…	MGPAPRTATTTYSSAKDLLEDIGESVQKEAKKQALGRSESVLHGLLSNATIKGVKNKATKPIQLEYEYHTNVTGGFDKNNPCANRLDVRFSDIYGGQCTDNKINGNDDETGGTCAPLRRLFLCDQHLSHMKEGNINNTDNLLLEVSLAAKYEGDSIINNYPDNRDKKEGICTALARSFADIGDIIRGKDLFLGYTKKDEKEKEKVQKNLKRIFNEIYKKMQDPAKSHYSGDSSDFYKLREDWWALNRKEVWKAITCKAKNDAEYFRKKDSDGKHCSVQNCKCVDGDPPTNLDYVPQHLRWFDEWSEEFCRKRKDQLKISLEKCRGKNKDKYCSLNGCNCKTTVRGKKKFDYQQECNDCLVACDPFVHWIDNEKLEFLKQKKKYKNEIKEREPTKKTSHG…	2394	1	null	no	GO_0016021	GO_0020002, GO_0020030	GO_0016021,GO_0020002,GO_0020030	0	0	0	0	0	0	0	0	0	0	0	0	0	0	0	0	0	0	0	0	0	0	0	0	0	0	0	0	0	0	0	0	0	0	0	0	0
1466	PF3D7_0632500	erythrocyte membrane protein 1, PfEMP1	VAR	ATGGGGCCGCCAGGAGGTAGCGGTGGTAGTACGCTGGATGAAAGTGTCAAAGATTTATTTGATAGGATAGGGAAAGAAGTGCATGACCAAGTGGAAAAGGAAGCTAACCAATATAAAGAGGCGTTGAAAGGAGATTTGTCAAGCGCAACATTTCCTACAGGACGACGACATGAAAAACCGCAGTCAGAATCATGCAAACTTAATTATATATATGATACTAATGTTACCAGTGGTGGTGGTAAAGAGAATCCTTGTTACGGTAGACAAGGTGTTCGTTTTTCTGATACAAAAGGAGCAAAATGTTATTCTTATAAAATAGAGGATAATGATAGTAGCATTGGTTTTTGTGCTCCTTATAGAAGGTTACATCTGTGTGTTCAAAATCTGGAACAGATAAAG…	MGPPGGSGGSTLDESVKDLFDRIGKEVHDQVEKEANQYKEALKGDLSSATFPTGRRHEKPQSESCKLNYIYDTNVTSGGGKENPCYGRQGVRFSDTKGAKCYSYKIEDNDSSIGFCAPYRRLHLCVQNLEQIKPDQITSTHNLLVDVLLAAKYEGQSITQDYPKYQATYDDSPSKMCTMLARSFADIGDIVRGKDLFLGTNEEKKPLEENLKEIFKKIYENLGIQEKNHYNDTPDYYKLREDWWIANRDQVWKAITCNAGGYSYFRKTCGGDNEKNSTLASNKCRCKDEKGEHDTDQVPTYFDYVPQYLRWFEEWAEDFCRKKKIKVENVKKSCRGEDKESKDRYCSRNGYDCEKTKRAIGKLRYGKQCISCLYGCNPYVDWIEKQKEQFDKQKKIYDK…	3954	0	null	no	GO_0016021	GO_0020002, GO_0020030	GO_0016021,GO_0020002,GO_0020030	0	0	0	0	0	0	0	0	0	0	0	0	0	0	0	0	0	0	0	0	0	0	0	0	0	0	0	0	0	0	0	0	0	0	0	0	0
1468	PF3D7_0632800	erythrocyte membrane protein 1, PfEMP1	VAR	ATGGCGCCAGGTAGGGGTGCTGGCGGGGATGGTATTGAGGATACCACGGCCAAACATTTATTGGATAGCATAGGGAAAAAAGTGCACGACAAAGCAAAAAATGCTGCTTTAGATCGTAGTAATAGTGATTTGCAAGGATTTTTGTCAGAAGCAAAATTTGAGAAAAATGAAAGCGATCCACAAACACCAGGAGATCCATGCCAACTTCAATATGAATATCATACTAATGTTACCCTTGGTTATGATAAAGAAAATCCTTGTAAAAAGAGATCGGACGTTCGTTTTTCTGATACAAAAGGAGCAGAATGTGATAATAGAAAAATAAGGGATAGTGAAAAGAAAAGCAATTATGGAGCATGTGCTCCATATAGACGGTTACATCTATGTGATCAACATTTG…	MAPGRGAGGDGIEDTTAKHLLDSIGKKVHDKAKNAALDRSNSDLQGFLSEAKFEKNESDPQTPGDPCQLQYEYHTNVTLGYDKENPCKKRSDVRFSDTKGAECDNRKIRDSEKKSNYGACAPYRRLHLCDQHLEKINRYDKVNNHTLLTDVCLAAKFEAESLKTYRGQHQLTNEGSQICTVLARSFADIGDIVRGKDLYLGNNKEKKQLEENLKKIFKEIYDKLDGKNGKKTLQERYKGDTTNYYQLREDWWNINRKKVWDAITCGAAGGTYFRKRACSSYYPTGEDCRCVANVPTYFDYVPQYLRWFEEWAEDFCRKKKKYVDIVKTNCRGESGKDKYCSGDGFDCTKTVRAKGIYAIGDDCHKCSFWCGFYKKWLANQKQEFLKQKKKCENEMLSIS…	2238	0	null	no	GO_0016021	GO_0020002, GO_0020030	GO_0016021,GO_0020002,GO_0020030	0	0	0	0	0	0	0	0	0	0	0	0	0	0	0	0	0	0	0	0	0	0	0	0	0	0	0	0	0	0	0	0	0	0	0	0	0
1570	PF3D7_0711700	erythrocyte membrane protein 1, PfEMP1	VAR	ATGGCGAGGCCAGGTAGCGGTGGTGGAGGTAGTTCACAGGATGCCAAACATGTATTGGATGAAATTGGGCAACAAGTGCACGACCAAGTGGAAAAGGAAGCTAAAGAACGTAGTAATGGTGATTTGAAAGGAAATTTGACAATATCAACAATTTTTGATACGGAAACAACTGGCACCGATGATCCATGCAGCTCTGATTATACTACACGTTTTGATGCTCGCGGTGATCCGTGCAAAAAAGATGGAACAGGAAACGATGTAGAGCGTTTTTCGGTTAAACAAGGAGCAGAATGTGGTAATAGTAAAATACATGGTAATAGTAAAGGTGGAACTGGTACGGAGGTTGGCGCCTGCGCGCCGTATCGACGATTAAATTTATGTAACAAAAATCTCGAAAAT…	MARPGSGGGGSSQDAKHVLDEIGQQVHDQVEKEAKERSNGDLKGNLTISTIFDTETTGTDDPCSSDYTTRFDARGDPCKKDGTGNDVERFSVKQGAECGNSKIHGNSKGGTGTEVGACAPYRRLNLCNKNLENINKYDNTKAKHDLLAEVCHAAKYEGASITLHYPQYQNKYDDSGSTMCTMLARSFADIGDIIRGKDLYLGKKKKKQNGKETEREKLEDNLRKIFENIKKENNSKLKSLTDDQIREYWWTENRETVWKAMTCSEDLKNSSYFHATCIDGKNQSQARNQCRCPKTSGNVNIVPTYFDYVPQYLRWFEEWAEDFCRKKKKKVQNLQKQCRDKYQGDDRYCSRNGYDCEQTINKIGKLVIGKGCINCLYACNPYVDWINNQKEQFDKQVKK…	2215	0	null	no	GO_0016021	GO_0020002, GO_0020030	GO_0016021,GO_0020002,GO_0020030	0	0	0	0	0	0	0	0	0	0	0	0	0	0	0	0	0	0	0	0	0	0	0	0	0	0	0	0	0	0	0	0	0	0	0	0	0
1571	PF3D7_0712000	erythrocyte membrane protein 1, PfEMP1	VAR	ATGGCGCCTACAAGTGATGGTGGTGGTACGAAGGATGAAAGTGCCAAACATGTATTGGATGAATTTGGGCAAAAAGTGTACGAAGAAATAGTGGGAAAAAAAGCTGATGCTAAAACATATAAAGATGAATTGAGAGGAAAGTTGTCACTAGCACCAATTTGGAATGAATCAGCTGGCACCGATGATCCATGCAAACTTGAAAGTGAATATACTGAACTTATTAGTGGTAGTCTTGCTTCTGGTGGTGCTGCTCGCGGTCATCCGTGCGGAAACGTAAGTGGAAATGATGGAACAGGAAATGACGATTTAAAACGTTTTTCTAAAGAACGTGTCTCTAAATATGATGAGAAAAAAATAAGAGGTAGTAATGATGGAGCCTGTCCTCCATATAGAAGATTA…	MAPTSDGGGTKDESAKHVLDEFGQKVYEEIVGKKADAKTYKDELRGKLSLAPIWNESAGTDDPCKLESEYTELISGSLASGGAARGHPCGNVSGNDGTGNDDLKRFSKERVSKYDEKKIRGSNDGACPPYRRLSLCNKNLENIKTNIIDNKHDLLVDVCMAAKYEGESIKAHYPKYDAEYSSGSGSDFPMCTMLARSFADIGDIVRGKDLYSGNKKKEKLEQNLQKIFKEIYDKLNGAKDHYQKDGDKFFQLREDWWTANRHTVWKALTCKAEGAYFRPTCSDGNSQSQATKQCRCNDKPNAGKPKAGNGDVNIVPTYFDYVPQYIRWFEEWAEDFCRKKKKKVQNLQKQCRGTDASKEPRYCSRNGFDCEKTISRIGKVRMGKGCTDCFFACHRYENW…	2275	0	null	no	GO_0016021	GO_0020002, GO_0020030	GO_0016021,GO_0020002,GO_0020030	0	0	0	0	0	0	0	0	0	0	0	0	0	0	0	0	0	0	0	0	0	0	0	0	0	0	0	0	0	0	0	0	0	0	0	0	0
1572	PF3D7_0712300	erythrocyte membrane protein 1, PfEMP1	VAR	ATGGCGTCGCAAAGTGGTGGAGGTAGTCCACAGGATGCCAAACATGTATTGGATGAATTTGGGCAACAAGTGCACAAAGAAGTGAAAAAGGAAGCTGAACGACGTAGTAAGGGTGAATTGAAAGGATTGTTAACCAGTGCAAAACTTTCTGGTGGGGAAATAGCTGGCACCACAGATCCGTGCAGCTCTGATTATACTAAACATTTTGAGGCTAACAGTAACAGGTATCCGTGCGGAAATACAAATGTAGACCGTTTTCCCGATAATGATGGAGCAGAATGTGATAATAGTAAAATAAAAGGTAATAAAGGTAAAGAAGATAATAGTGAAGGAGCTTGTGCTCCATATAGACGATTATCTCTATGTAACAAAAATTTTCAAAATAACAATAATGATCAT…	MASQSGGGSPQDAKHVLDEFGQQVHKEVKKEAERRSKGELKGLLTSAKLSGGEIAGTTDPCSSDYTKHFEANSNRYPCGNTNVDRFPDNDGAECDNSKIKGNKGKEDNSEGACAPYRRLSLCNKNFQNNNNDHSSNAKHDLLLDVCMAANYEAQSLITYHDKHELTNVGSQICTVLARSFADIGDIVRGKDLYLGKKKKKKTETERERDQLEQKLKGIFKKIYEGLTGGVKDHYQDTDNYYELREDWWALNRDQVWKAITCKADNSNRYFRATCDSADGKGSSVARNKCRCKDEEGKNETNEVPTYFDYVPQYLRWFEEWAEDFCRKKKKYVDIVKTYCRGKYQGEERYCSRNGFDCEKTVNARGKVRMGKGCTDCFFACNPYVDWIDNQRKQFLKQRN…	2267	0	null	no	GO_0016021	GO_0020002, GO_0020030	GO_0016021,GO_0020002,GO_0020030	0	0	0	0	0	0	0	0	0	0	0	0	0	0	0	0	0	0	0	0	0	0	0	0	0	0	0	0	0	0	0	0	0	0	0	0	0
1573	PF3D7_0712400	erythrocyte membrane protein 1, PfEMP1	VAR	ATGGCGGCTGCAGGAAGTGGAGGCCAGGGTGCCAGGGATGTATTGGAACAATTTGGAGAAATTGTACAGAAAAAAGTGCATAATGAAGTCGATGCTTATAGAGAAGAACTGAAGGGAAAATTATGGGAAGCAAAATTTGTTGGTGTGTCACATGTTCCTTCAGATCCATGCCAACTTAATCATGAATATCACACTAATGTTACGACAGGAAAAGATGACCCATGTGATAGAAGATGGCCAGTCCGTTTTTCTGATGAAAGTCGAAGTCAATGTACTAAAAATAGAATAAAAGATAGTACTAGCGATACTGTAGGAGCCTGTGCTCCATATAGACGATTGCATGTATGCGATCAAAATTTAGAACAAATAAGGCCTGAACAAATCACAAGTACTGATAAT…	MAAAGSGGQGARDVLEQFGEIVQKKVHNEVDAYREELKGKLWEAKFVGVSHVPSDPCQLNHEYHTNVTTGKDDPCDRRWPVRFSDESRSQCTKNRIKDSTSDTVGACAPYRRLHVCDQNLEQIRPEQITSTDNLLADVCLAAKHEGESIIKNYPQDRNNNEVICTALARSFADIGDIIRGKDLYRGDKGEKKKLEENLKNIFANIYEELKNGKTNGKKGEIETRYKKDDEDGNFFQLREDWWNANRNDIWKALTCHAPPDAQYTKKGPHNHITESNKGQCRCFSGDPPTNMDYVPQYLRWFEEWAEEFCRKRKKKLQNAQKFCRDESSKLYCSLNGYDCKATIRANDEYTISQACAKCFFSCHRFVKWIDNQKLELEKQKKKYDEEINVTTETSKKTEH…	2064	0	null	no	GO_0016021	GO_0020002, GO_0020030	GO_0016021,GO_0020002,GO_0020030	0	0	0	0	0	0	0	0	0	0	0	0	0	0	0	0	0	0	0	0	0	0	0	0	0	0	0	0	0	0	0	0	0	0	0	0	0
1574	PF3D7_0712600	erythrocyte membrane protein 1, PfEMP1	VAR	ATGGCGCCAGGAGGTCGTCAGGGTGATGGTGGGGAAGATATTGACCACCAAAGTGCCAAACATTTATTGGATAGCATAGGGAAAATAGTGCACGACCAAATGAAAAAGGAAGCTGAACAACGTAGTAAGGGTGAATTGGAAGGAAAGTTGTCATTTGCAACTGTTAGTGGAGAAACAGGTGCCACCGATAAACCATGCAATTTTGATTATGATAAACTTATTGGTGCTAATGATGGTAAAAGGCATCCGTGCAAAAAAGATGGAAAAGGAGAAGAAGTACCACGTTTTTCGGATAAACAAGGAGCAGAATGTGCTAATAATAGAATACAAGGTAATAATAAAAATAGTCATTATAAGGATTTTGGCGCCTGCGCGCCCTTTCGACGATTAAATTTATGC…	MAPGGRQGDGGEDIDHQSAKHLLDSIGKIVHDQMKKEAEQRSKGELEGKLSFATVSGETGATDKPCNFDYDKLIGANDGKRHPCKKDGKGEEVPRFSDKQGAECANNRIQGNNKNSHYKDFGACAPFRRLNLCNKNFPNMNSNDSSKAKHDLLVDVCLAAKYEGDSLKHYSEKLNLTYTDSPSQLCTELARSFADIGDIIRGKDLYLGYNRKEKAQKEKLEQNLKKFFQNIDEKLPLKAKNYYTKEKDPNFLKLREDWWTANRETVWEALTCDAHGTYFHATCSDLNGDCSQAHEKCRCPKTSGGKAIKAGGDVTIVPTYFDYVPQYLRWFEEWAEDFCRKKKKYVDIVKTYCREQDKSGNQRYCSRNGYDCTKTVRARGKYRMGNQCTKCLFACNPYV…	2215	0	null	no	GO_0016021	GO_0020002, GO_0020030	GO_0016021,GO_0020002,GO_0020030	0	0	0	0	0	0	0	0	0	0	0	0	0	0	0	0	0	0	0	0	0	0	0	0	0	0	0	0	0	0	0	0	0	0	0	0	0
1575	PF3D7_0712800	erythrocyte membrane protein 1, PfEMP1	VAR	ATGGCGCCGCCAGGAGGTAGCGTTGGTGCTGGTAGTGGTGGTGAGGAAGATGCCAAACATATGTTTGATAGGATAGGAGAAGAAGTGTACAAAGAAGTGAAGAATGGTGGTGCTGAAAAATATTTTTATGAATTGCATGGAACTTTGTCAAAAGCAAGATTTGAGAATGAACCAGAGGGTCTACAAACACAAGGAAATCCATGCCAACTTGATCATAGATATCATACTAATGCTACTAACGTTAGAAGTTATCCATGTAGAGCTGGAAAAGAAGAACGTTTTTCTCAAGTACATGGCGGTGAATGTGATAAGAACAAAATAAGAGATAATGAAGACGACAGGGTAGGAGCATGTGCTCCCTTCAGAAGATTACATTTATGCGTTAGAAATTTAGAAAAT…	MAPPGGSVGAGSGGEEDAKHMFDRIGEEVYKEVKNGGAEKYFYELHGTLSKARFENEPEGLQTQGNPCQLDHRYHTNATNVRSYPCRAGKEERFSQVHGGECDKNKIRDNEDDRVGACAPFRRLHLCVRNLENINIKKKIDNDNLLADVCLAAKYEGDLIKTHYTPYEHKYGDSPSQLCTMLARSFADIGDIVRGKDLYLGNSREKEKLQTNLKSIFQNIYKNLKKPAQKHYSDPHANFYKLREDWWYANRQQVWYAITCGAEGYQYFRKTACNGGKSSTPNKCRCTTHDVPTYFDYVPQYLRWFEEWAEDFCRKRKKQLTDAIKNCREEDENGENRYCDLNGYDCKNTAKGKNKYKHDQECIKCSSVCIPFGPWIKNQKQEFEKQKNKYENEILGKSR…	2239	0	null	no	GO_0016021	GO_0020002, GO_0020030	GO_0016021,GO_0020002,GO_0020030	0	0	0	0	0	0	0	0	0	0	0	0	0	0	0	0	0	0	0	0	0	0	0	0	0	0	0	0	0	0	0	0	0	0	0	0	0
1576	PF3D7_0712900	erythrocyte membrane protein 1, PfEMP1	VAR	ATGGCGCGAGATCCTCGTGGTGGGGGTAGTGAGGAGGATGATATTGACCACAAAAGTGTGAAACATTTATTGGATAGCATAGGGAAAATAGTGCACGACCAAGTGAAAAATGGTGCTGATGGTACTGCTAAAAAATATATTAAGGAATTGAAAGGAGATTTGTCAAAAGCAACATTTTCTAGTGAGGAAACAGCTAGCAGTATTGAAACATGCTACCTCGTAAAAGAATATTATAATAACCATGTTAATGGTGGTGATGTTAGCGGTGAAAGGAATCCGTGCAGAAAAGAAGATGTAAAGCGCTTTTCCGACAAAGAAGGAGCAGAATGTACGAATAATAAAATAAATTGTAATAAAGGTGGTTGCGGAGCCTGTGCTCCATATAGAAGATTGCACGTA…	MARDPRGGGSEEDDIDHKSVKHLLDSIGKIVHDQVKNGADGTAKKYIKELKGDLSKATFSSEETASSIETCYLVKEYYNNHVNGGDVSGERNPCRKEDVKRFSDKEGAECTNNKINCNKGGCGACAPYRRLHVCDKNMEKMGRTSMTTHKLLAEVCYAAKYEGASITLHYPQYQEKYDDSPSEMCTMLARSFADIGDIVRGKDLFIGYNQKDRKEKEQLQNKLKYIFKKIHEKLDSEAQTRYNDATGNFYQLREDWWTANRATIWEAMTCSEDLKNSSYFRQTCSDERGGAQANDKCRCPNGNNQVPTYFDYVPQYLRWFEEWAEDFCRKKKKYVDIVKKFCREGENGKEKYCSLNGYDCTKTKLAVGKYRMGNQCTKCFFACYPYENWIEKQKEQFDK…	2192	0	null	no	GO_0016021	GO_0020002, GO_0020030	GO_0016021,GO_0020002,GO_0020030	0	0	0	0	0	0	0	0	0	0	0	0	0	0	0	0	0	0	0	0	0	0	0	0	0	0	0	0	0	0	0	0	0	0	0	0	0
1761	PF3D7_0733000	erythrocyte membrane protein 1, PfEMP1	VAR	ATGGCGAGGCCATCAGGTAGTGCTGGTGGGGGTGCTGGTGGTAAAAAGGAGGATGAAAGTGCCAAACATATGTTTGATAGGATAGGGAAAGAAGTGTACGACGAAATAGTGAAAAAGGATGTTGGTGCTGAAGCATATAAAGAGGCGTTGAAAGGAAAGTTGCAGAAAGCAGCAAGTACTATTTCGGAATTAGCTGGCATCACAGATACATGCAAACGTGTACAGAAATATTATGAGCACTTTAATGTTGGTGCTGCTCGCGGTAAAAGGTATCCGTGCACAAATTTAAAAAGAAATACAAATGAAGAACGTTTTTCCAATACACTTGGTGGTCAGTGTACTAACAAAAAAATGAAATGTAGTAATGGTGAAGGAGCTTGTGCACCATACCGACGTCTA…	MARPSGSAGGGAGGKKEDESAKHMFDRIGKEVYDEIVKKDVGAEAYKEALKGKLQKAASTISELAGITDTCKRVQKYYEHFNVGAARGKRYPCTNLKRNTNEERFSNTLGGQCTNKKMKCSNGEGACAPYRRLHLCHHNLETIETTSKTSTDTLLAEVCMAAYYEGESLTRQHVKHKLTNSDVNINICTVLARSFADIGDIVRGKDLFYGNTYESTQRKVLDDNLKTIFENIKKSDTKLTKLNDEQIREYWWEANRETVWKAITCSDDLKNSSYFRTTACAGTRTNDKCRCTKSSGAKVDDQVPTYFDYVPQYLRWFEEWAEDFCRKKNKKIKDVKTNCRDEKEKYCSGNGYDCRKTIYKKGKLVIGEHCTNCSVWCRLYEKWIDNQKKEFLKQKNKYT…	2595	0	null	no	GO_0016021	GO_0020002, GO_0020030	GO_0016021,GO_0020002,GO_0020030	0	0	0	0	0	0	0	0	0	0	0	0	0	0	0	0	0	0	0	0	0	0	0	0	0	0	0	0	0	0	0	0	0	0	0	0	0
1762	PF3D7_0800100	erythrocyte membrane protein 1, PfEMP1	VAR	ATGGCGGCTGCAGGTGGGGGTGGTAAGGATAAGTATAAAAATGCCCAGGATGCCAAGCATCTTTTGGATATAATTGGAGAAGATATATACAAAATAGCAAATGATGCTGCTCTAAAACGTAGTGGGAGTGAGTTAAAAGGATTGTTGTCACTAGCAAAATTTGAGAAAAATCCACCGGATAAACAAACACCAGAAGATCCATGCGATCTTGATTATAAATATCATACTAATGTTACTAGTAACGTAATTGAACCGTGCAACAAAAGATCAGGAAAACGTTTTTCTGAAGTAAGTGGCGCAGAATGTGCTAATAATAGAATAAAAGGTAATAAAGGTAGTAATGGTGACGCTTGCGCGCCGTTCAGACGATTACATGTATGCGACAGAAACCTAGAACAG…	MAAAGGGGKDKYKNAQDAKHLLDIIGEDIYKIANDAALKRSGSELKGLLSLAKFEKNPPDKQTPEDPCDLDYKYHTNVTSNVIEPCNKRSGKRFSEVSGAECANNRIKGNKGSNGDACAPFRRLHVCDRNLEQIDPAKITATHNLLVDVCQAAKFEGQSITQDYPKYLATYNDSPSQICTMLARSFADIGDIVRGKDLFRGYDDEEKNRRKKLEQKLKVIFGHIYEELKKHKKLKEEAEERYKKDGDNYYKLREDWWALNRQEIWKAITCGHPGGTYFRQTACGGGTTPTPNKCRCATNDVPTYFDYVPQYLRWFEEWAEDFCRKRKYKLENAIEKCRGKTKGEKYCDLNGFDCTQTASGEKKFVKGHNCHNCSVTCIPFGPWIDNQKKEFLKQRNKYQ…	2120	0	null	no	GO_0016021	GO_0020002, GO_0020030	GO_0016021,GO_0020002,GO_0020030	0	0	0	0	0	0	0	0	0	0	0	0	0	0	0	0	0	0	0	0	0	0	0	0	0	0	0	0	0	0	0	0	0	0	0	0	0
1763	PF3D7_0800200	erythrocyte membrane protein 1, PfEMP1	VAR	ATGGGATCTCAAGGATCTAAACCTGTGGATACAAGCGATGTTAAAAATGAAAGTCACAACAGTGCCAGAAATGTTTTTGAAAATATTGCAGAAATAATATACAACCGAGTGAAAGAAGATGCAGAAAAACGTGGTAAATCTTTGAAAGGAGATTATAAGAGAGCAAAATTTCATCAGCCCTTATTAGAGGCAGCGAAATATGTTTGGTACGCTCCTAGTAATCCATGCAATTTTGATTTTAGGTTTGATACTAATGCTCCGGATAAAGGTTCATATGATAGAGATCCTTGTCATTTGAGAGATACAAATCGTTTTTCAGACAAAGGAGATGCAATATGTACTAATAATAAAATAAATTGTAATAATGGTGGTTGCGGAGCCTGTGCTCCATATAGAAGA…	MGSQGSKPVDTSDVKNESHNSARNVFENIAEIIYNRVKEDAEKRGKSLKGDYKRAKFHQPLLEAAKYVWYAPSNPCNFDFRFDTNAPDKGSYDRDPCHLRDTNRFSDKGDAICTNNKINCNNGGCGACAPYRRIQLCDYNLEYINEYNINSTHDLLGNLLVMAKREGDSIVNSHGHTGKGIYKSGICTSLARSFADIGDIIRGKDLFLGHNHKKKPLLDNLEKIFNRFQKIYEDINNLPIDDIREYWWALNRNDVWEALTCSAPYYADYFKKKSGNTYNFTTEGYCGRNEGAPPTNLDYVPQFLRWFDEWAEEFCRIKNIKIGNIKKSCTGESNNKHCSREGYDCNKTNLRLNEIFMDLECPRCADDCKSYETWVENKKKEFNKQKEKYKEEINESKPG…	2858	0	null	no	GO_0016021	GO_0020002, GO_0020030	GO_0016021,GO_0020002,GO_0020030	0	0	0	0	0	0	0	0	0	0	0	0	0	0	0	0	0	0	0	0	0	0	0	0	0	0	0	0	0	0	0	0	0	0	0	0	0
1764	PF3D7_0800300	erythrocyte membrane protein 1, PfEMP1	VAR	ATGGTTCCCCCTGTCCGTTCCCCTCGTGCGGCTGGGCCAGCGCCAGCGCCCGCATCAGCATCCACTACATATGGTAGTGTAAAGGATCTTTTGGAGGACATTGGAAAGTCTATACAAAAACAAGCAAAGGATGCCGCTGAAAAACGTAGTAATGGTGAATTGCAAGGAGATTTGTCAAAAGCAAGATTTAAAGATCAGAAGAACACAACCACAAATCCATGCCAACTTAATTATAGAAATCACAGTAATGTTAGAAGTAGTTTTGAGAATGATAATCCGTGTTATGGTAGAGAAGAAAAACGTTTTTCTGACTCACGCAGTGGCCAATGTACATACAATAGGATAAAAGATAGTAAGGAAGGTGATAATAAAGTAGGAGCATGTGCTCCATATAGACGA…	MVPPVRSPRAAGPAPAPASASTTYGSVKDLLEDIGKSIQKQAKDAAEKRSNGELQGDLSKARFKDQKNTTTNPCQLNYRNHSNVRSSFENDNPCYGREEKRFSDSRSGQCTYNRIKDSKEGDNKVGACAPYRRLHICDHNLENINDYKNINNHTLLVDVCLSAKHEGEMIANKLKEYDKSNYESRICTVLARSFADIGDIVRGKDLYLGDQQEKLYLENNLKKIFAKIHENLNDKIKSNYNDSEGNYFKLREDWWTANRDQVWKAITCNAPKDANYFEYNSGKFFKFSNDQCGHNNGGAPPTNLDYVPQFVRWFEEWADDFCRIRKHKLKNIKDVCRNESKPLYCSLNGYDCTKTSWKNDFESREHYCTPCFSACSLYKIWVANQKKEFEKQKKKYEKE…	2980	0	null	no	GO_0016021	GO_0020002, GO_0020030	GO_0016021,GO_0020002,GO_0020030	0	0	0	0	0	0	0	0	0	0	0	0	0	0	0	0	0	0	0	0	0	0	0	0	0	0	0	0	0	0	0	0	0	0	0	0	0
1840	PF3D7_0808600	erythrocyte membrane protein 1, PfEMP1	VAR	ATGCCGCCTCTAGGTCGTCAGGTTGGTGGTAGTCCACAGGATGATGATGCCAAAAATATGTTTGATAGGATAGGGAAAGACGTGTACGACCAAGTGAAAAAGGGTGTTGCTGAAACATATAAAGAGGCGTTGACAGGACAGTTGTCACTAGCAACACTTTTGGGTGTGGAATCAGCTAGCACCACAGATCCATGCGGACTTGATTATAGTAAACTTATTAGTGGTAGTGGTGTTGCTGCTCGCGGTCATCCGTGCGGAAATGAAAGTGTAAGTGAAAAACGTTTTTCTAAAGAACGTGTCGATGAATATGATGAGAAAAAAATAAAAGATAATAAAGGTAATAGAGGTAATAATGAAGGAGAGTGCGCTCCATATAGAAGGTTATCTCTATGTAACAAA…	MPPLGRQVGGSPQDDDAKNMFDRIGKDVYDQVKKGVAETYKEALTGQLSLATLLGVESASTTDPCGLDYSKLISGSGVAARGHPCGNESVSEKRFSKERVDEYDEKKIKDNKGNRGNNEGECAPYRRLSLCNKNFQKINNIDSDKARHNLLVDVCLAAHYEGDSIKAHLEQYDATYPGSGSTTCTALARSFADIGDIVRGRDLYRGNKKKIKTETERDKLEQKLKEIFKNIKKENNEKLKSLTDDQIREYWWTANRHTVWKAITCKADASSAYFHATCSDSHRSGTFSQANNYCRCNGDQPGNDKENIDPPTYFDYVPQYLRWFEEWAEDFCRKKKHKLNDAIQKCRGEDKYGKDRYCDLNGYDCEKTKRGRNMYRWDHKCTGCFLSCSHFRTWIDNQK…	2265	0	null	no	GO_0016021	GO_0020002, GO_0020030	GO_0016021,GO_0020002,GO_0020030	0	0	0	0	0	0	0	0	0	0	0	0	0	0	0	0	0	0	0	0	0	0	0	0	0	0	0	0	0	0	0	0	0	0	0	0	0
1841	PF3D7_0808700	erythrocyte membrane protein 1, PfEMP1	VAR	ATGGCAGCATCCACTACGTATAGTAGTGCCCCGGATGCCAAGCATCTTTTGGATATGATTGGGAAAGACGTGCATGACCAAGTGAAAAAGGAAGCTAAAGAACGTAGTAAGGGTGAATTGACAGGACAGTTGTCATTTGCATCAATTTTGGGGGAAAGAGCATACACCACAGATCCGTGCCAACTTATAAAAGAAAAACGTGAGAACCTTATTGGTGATCGCGGTGAAAGGCATCCGTGCGGAAATGGAAGTGGAAAAGGAGAAGATGTAAACCGGTTTTCTAAAGAACGTGTCGATGAATATGATAACAAAAAAATGAAATGTAGTTATGGTAGTAATGGTAAAAGTGAAGGTGCATGTGCTCCTTTCAGACGATTACATGTATGTGATAAAAATATC…	MAASTTYSSAPDAKHLLDMIGKDVHDQVKKEAKERSKGELTGQLSFASILGERAYTTDPCQLIKEKRENLIGDRGERHPCGNGSGKGEDVNRFSKERVDEYDNKKMKCSYGSNGKSEGACAPFRRLHVCDKNIQQIKTENITTHNLLLDVCLAAKYEGESLKGYHEQYEVQYPSSGSTMCTELARSFADIGDIVRGRDLYGGSKKEKEKRKQLDDKLKKIFENIKKENNEKLKSLTDDQIREYWWTANRETVWKAITCDEENKLGGYLYFRGTCGDNEKSVTQARDKCRCKKKDNTPDDQVPTYFDYVPQYLRWFEEWGEDFCRKKKKKVENAKKKCRGENNDKYCSRNGCDCEKTVRAKGKLRYGNRCTDCLYACYPYVHWIDKKKEEFDKQVKKYDE…	2231	0	null	no	GO_0016021	GO_0020002, GO_0020030	GO_0016021,GO_0020002,GO_0020030	0	0	0	0	0	0	0	0	0	0	0	0	0	0	0	0	0	0	0	0	0	0	0	0	0	0	0	0	0	0	0	0	0	0	0	0	0
1844	PF3D7_0809100	erythrocyte membrane protein 1, PfEMP1	VAR	ATGTCGACGCTAGGAGGTGGTACTGACAAGAGTGCCAAACATGTATTGGATGAATTTGGGCAACAAGTGTACGAGCAAGTGAAAAATGGTGAGGCTAAAACATATTTTGATGAATTGCATGGAGATTTGTCAGAAGCAACATATCCAGGGGATGAAAATCCTAATAAAACAACGCCACCAAATCCATGCTTACTTCAATATGATTATAATAGTAATGTTACCATTGGTGGGGGTAGGGAGTATCCTTGTAAAGATAGACCAGAAGTTCGATTTTCTGATGAATATGGAGGTCAATGTACTGATAGTAAAATAAAGGGTAACGAAGATAATAAAGGTGGAGCATGTGCACCATTTAGAAGGTTATTTCTATGTGATCAACATTTATCACACATGAAAGCT…	MSTLGGGTDKSAKHVLDEFGQQVYEQVKNGEAKTYFDELHGDLSEATYPGDENPNKTTPPNPCLLQYDYNSNVTIGGGREYPCKDRPEVRFSDEYGGQCTDSKIKGNEDNKGGACAPFRRLFLCDQHLSHMKAEKINNKHNLLLEVCLAAKYEGESLKGYHDKYNATYSDSRSQLCTVLARSFADIGDIIRGKDLFIGYDKKDRVQKKKLQDSLKNIFGNIYNELTTSGKNVDKAKARYNDPKGDFFQLREDWWALNREKVWSAITCNAQGNKYFRPTCSGGESIAHNKCTCINGDPPTYFDYVPQYLRWFEEWAEDFCRKRKHKLQNAKEQCRGKNGEDKYCDLNGYDCKRTISAEKKLFPDSDCNKCSYSCIPFRTWIDNQKLEFLKQKNKYDKEKE…	2109	0	null	no	GO_0016021	GO_0020002, GO_0020030	GO_0016021,GO_0020002,GO_0020030	0	0	0	0	0	0	0	0	0	0	0	0	0	0	0	0	0	0	0	0	0	0	0	0	0	0	0	0	0	0	0	0	0	0	0	0	0
2079	PF3D7_0900100	erythrocyte membrane protein 1, PfEMP1	VAR	ATGGGGCCCAAGACGCGTGCGCCTGACTATAGTAGTGCCCCGGATGCCAAGCATCTGTTGGATATGATTGGGAAAGACGTGCACGAAAAAGCGAAAAGTGAAGCTAAAAATTATATTGAGGAATTGAAAGGAGATTTGAACACAGCAAATGGTCGTAGTTCGGAAACAAGATACACCACAGATACGTGCACCCTTGTAAAAGAATATTATACTACACGTCTTGGTGTTAACAATGAAAGGAATCCGTGCAAAGGGTTAAGTGGAATAATTGTAGAACGTTTTTCGGATACACTTGGTGGCCAATGCACTGATCATAGAATAAAAGGTAATAATCGTAATGTAACTGGTGGAGCATGTGCTCCATATAGAAGATTGCACGTATGCGACAAAAATATGGAA…	MGPKTRAPDYSSAPDAKHLLDMIGKDVHEKAKSEAKNYIEELKGDLNTANGRSSETRYTTDTCTLVKEYYTTRLGVNNERNPCKGLSGIIVERFSDTLGGQCTDHRIKGNNRNVTGGACAPYRRLHVCDKNMEKIPTSKTSTDTLLAEVCYAAKYEGDSISGRYRQHQLTNKGSQLCTVLARSFADIGDIVRGRDLYLGYDDKEKEKRDQLESKLKVIFGNIYGNLDKNNRYNDDTPEYYKLREAWWDANRAKVWEAITCDAPDNAKYFRGTCGGDDEKTGTQAIHKCRCTKSSGGKPGKNETDQVPTYFDYVPQFLRWFEEWAEDFCRKKKHKLKDVKTNCRNDEEQRYCSGNGFDCTKTIYKKGRIVIGEHCTKCSVWCRMYESWIDNQKKEFLKQK…	2270	0	null	no	GO_0016021	GO_0020002, GO_0020030	GO_0016021,GO_0020002,GO_0020030	0	0	0	0	0	0	0	0	0	0	0	0	0	0	0	0	0	0	0	0	0	0	0	0	0	0	0	0	0	0	0	0	0	0	0	0	0
2461	PF3D7_0937800	erythrocyte membrane protein 1, PfEMP1	VAR	ATGGCTCTAGGTCGTCCGGGTGGTGAGGATAAGTATAAAAATGCCAAGGATGCCAAGCATTTATTGGATAGCATTGGAGAAGAAGTGTACAAAGAAATAGTGGAAAAGGATGATGCTGAAAAATATAAAGAGGCGTTGAAAGGAAAATTGTCACAAGCATCAATTTGGAGGGAAACAGTTAGCAGCCTTAAAACATGCGACATTATAAAATATGAAGGTCATAAACTTCTTGCTGCTCGCGGTGATCCGTGCAAAAAAGACACAAACGGAAACGATGTAGACCGTTTTTCGGTTAAAGAACAAGCAGAATATGATAACAAAAAAATGAAATGTAGTAATGGTAGTAATGGTAGTAATGGTAAAAATGAAGGAGCATGTGCGTCGTTTCGACGATTAAAT…	MALGRPGGEDKYKNAKDAKHLLDSIGEEVYKEIVEKDDAEKYKEALKGKLSQASIWRETVSSLKTCDIIKYEGHKLLAARGDPCKKDTNGNDVDRFSVKEQAEYDNKKMKCSNGSNGSNGKNEGACASFRRLNLCKKNMEKIPTSSTKHDLLADVCMAANYEAQSLIRDHPKYKLKYSDSQLCTELARSFADIGDIVRGRDLYLGNPQEKGKRDELDKKLKDIFKQIHDDVTTNGKNKDALKTRYNDDAKGGHFYQLREDWWIANRHTVWEAITCDDDDKLGGYSYFRATCGSGNNATLARDKCTCNNGDVPTYFDYVPQYLRWFEEWAEDFCRKKKKYVDIVKTYCRGKDKNSEERYCSRNGFDCEKTKRAIGKLRYGKQCISCLYACNPYVEWIDNQ…	2264	0	null	no	GO_0016021	GO_0020002, GO_0020030	GO_0016021,GO_0020002,GO_0020030	0	0	0	0	0	0	0	0	0	0	0	0	0	0	0	0	0	0	0	0	0	0	0	0	0	0	0	0	0	0	0	0	0	0	0	0	0
2462	PF3D7_1000100	erythrocyte membrane protein 1, PfEMP1	VAR	ATGGCGGCGCAAAGTAGTGGTGGGGGTGGAGGTTGTGGTGAGGAAGATAAAGATGCCAAATATATGTTTGATAGGATAGGGAAAGAAGTGCACGACGAAGTGAAAAATGCTGCAAATGTCTTTAAAGATTATTTGAAAGGAAATTTGACAATATCAACAATTTTTGGTGAGGAAACAGTTGCCTTCACAGATCCGTGCGAGCTTATAAAAGAAAAACGTGATGAACTTCTTGCTGCTCGCGGTGATCCGTGCGGAAAAGGAAAAGAACATCGTTTTTCTAAAGAACGTGGCGCTGAATGTGATGATAACAAAATTGAAGGTAATGTTCGTAGTAAAGGTAAAGGAGGTAAGAGTGCAGGTGCATGTGCTCCATATAGACGGTTATCTCTATGTAACAAA…	MAAQSSGGGGGCGEEDKDAKYMFDRIGKEVHDEVKNAANVFKDYLKGNLTISTIFGEETVAFTDPCELIKEKRDELLAARGDPCGKGKEHRFSKERGAECDDNKIEGNVRSKGKGGKSAGACAPYRRLSLCNKNFPNMNSKDSLKAKNDLLVDVCYAAKYEAESLIPYHDQYKLTYGDSQICTVLARSFADIGDIVRGKDLFLGHNQRKKKLEERLEQMFKNITHSNAAKLSVLSSKEIREYWWALNRDQVWKALTCDEENKLGGNAYFHATCSERNGGCSQAHEKCRCPMTSDGKPNDQVPTYFDYVPQYLRWFEEWAEDFCRKKKIYVDIVKKYCRGERDGEKYCSLNGCDCTKTVRARGKLRYGNRCTDCLFACHRYENWIDNQRKQFLKQRNKYT…	2241	0	null	no	GO_0016021	GO_0020002, GO_0020030	GO_0016021,GO_0020002,GO_0020030	0	0	0	0	0	0	0	0	0	0	0	0	0	0	0	0	0	0	0	0	0	0	0	0	0	0	0	0	0	0	0	0	0	0	0	0	0
2873	PF3D7_1041300	erythrocyte membrane protein 1, PfEMP1	VAR	ATGGTTAGGACATTAGATCCTGAGGAGGAGTTAAGGGGTATTGAGGATACAACTGCCAAACATGCATTAGATAAAATTGGAGAAAAAATATATGAAAAAGCAAAAAAAAATGCAGAACAATATAGAAGTCAATTGCATGGACGTTTGTCAGATGCAAGATTTGAGAAAGCTCCAAAGGAACAACAAACACCTTCTGGTCCATGCGGCCTTAATCATGAATATCATACTAATGCTACTAACGGTAAAAGTTATCCATGTAGAACTGGAAAAGAAGAACGTTTTTCTCAAGTACATGGCGGTGAATGTGATAAGAACAAAATAAGTGGTAATAAGGATGATGAAGGTGCATGCGCTCCGTATAGACGATTAAATTTATGCGTTAGAAATTTGGAAAATATC…	MVRTLDPEEELRGIEDTTAKHALDKIGEKIYEKAKKNAEQYRSQLHGRLSDARFEKAPKEQQTPSGPCGLNHEYHTNATNGKSYPCRTGKEERFSQVHGGECDKNKISGNKDDEGACAPYRRLNLCVRNLENISNYGKINNDTLLADVCLAALHEGAAISSDHGKYQETNNDVNANICTMLARSFADIGDIIRGKDLYRGVNGNDKLEKNLKKIFGIIYEGLTKANGKKGQKPAKDHYGDDENYYKLREDWWNNNRLMVWYAITCGAPKEAQYFRKTCGSGERTKDNCRCAIHGVPTYFDYVPQYLRWFEEWAEEFCRLRKHKLQNAIKNCRGENNEKYCDLNGYDCEKTIRGKKKLFEGADCKKCTVTCDNFVPWIKNQKQEFDKQKNKYAEEIKKAK…	2194	0	null	no	GO_0016021	GO_0020002, GO_0020030	GO_0016021,GO_0020002,GO_0020030	0	0	0	0	0	0	0	0	0	0	0	0	0	0	0	0	0	0	0	0	0	0	0	0	0	0	0	0	0	0	0	0	0	0	0	0	0
2874	PF3D7_1100100	erythrocyte membrane protein 1, PfEMP1	VAR	ATGGAGCCGCATGGAGGTAGCGGTGGTGGCGGGGATGTTATTGACCACCAAAGTGCCAAACATTTATTGGATAGCATAGGGAAAATAGTGCACGACCAAGTGGAAAAGGAAGCTGCAGATTATAGAAGTTCTTTACAAGGACGTTTGAAAGACGCAACATATTCAAAAAAACCAGATAATCAAGAAAAACCTTCTGATCCATGCGAACTTAAACATGAATATCGTACTAATGCTACTAACGGTACAAGTTATCCATGTAGAGCTGGAAAAGAAGAACGTTTTTCCGATACACTTGGTGGCCAATGCACTGATCAACAAATAGAAGGTAATGATCGTAATAATGGTGGCGCCTGTGCGCCATATAGACGATTACATTTATGCAACAAAAATATGGTAAAA…	MEPHGGSGGGGDVIDHQSAKHLLDSIGKIVHDQVEKEAADYRSSLQGRLKDATYSKKPDNQEKPSDPCELKHEYRTNATNGTSYPCRAGKEERFSDTLGGQCTDQQIEGNDRNNGGACAPYRRLHLCNKNMVKMDTNNDDSSKAKHNLLLDVCMAAKYEGYSINTHYPKHQEKYKDTGTASQLCTVLARSFADIGDIVRGRDLFRGNKKKSENKREKEKLEENFKKYFQQIHEDVTSTSGKNRKALRDRYHKDGPDYYQLREDWWNNNRKMVWIAMTCEAGGSQYFRRTCSNGISETNNKCRCTIETVPTYFDYVPQYLRWFEEWAEDFCRKKKHKLKDAIDKCRGQYQDADRYCDLNGYDCEKTKRGINMYRWDHKCTGCFLSCSHFRTWIDNQKEQF…	2182	0	null	no	GO_0016021	GO_0020002, GO_0020030	GO_0016021,GO_0020002,GO_0020030	0	0	0	0	0	0	0	0	0	0	0	0	0	0	0	0	0	0	0	0	0	0	0	0	0	0	0	0	0	0	0	0	0	0	0	0	0
2875	PF3D7_1100200	erythrocyte membrane protein 1, PfEMP1	VAR	ATGGGGTCACAAACATCAAAATTTTCTAAAACTGTTGTTGGAAATGAAACACACAACAGTGCCCGAAATGTTTTGGAAGGTTTTGCAAAAGATATAAAAAGGGATGTATCAAATAACGCAAAAAGACATGGAAAAGTTTTGAAGGGAAATTTGAGAGATGCCAAATTTTATCATGATTATTCTAAGTTAAGAGACATACCTAGAAGTCCCTGTGATCTTGATTTTTGGTTTCATACGAATGTTTGGAGGGACAAAGCATATGAAAGAGATCCTTGTTATGGCAGACAAGCAAAAAATAATTACAATTTGGAAGGAGCAGTATGTACGAATAGTAAAATAAAAGGTAATGAAAACAAGATAAATGACATTGGAGCGTGTGCCCCATATAGAAGACGAAAT…	MGSQTSKFSKTVVGNETHNSARNVLEGFAKDIKRDVSNNAKRHGKVLKGNLRDAKFYHDYSKLRDIPRSPCDLDFWFHTNVWRDKAYERDPCYGRQAKNNYNLEGAVCTNSKIKGNENKINDIGACAPYRRRNICDYNLEHLNERNVLNTHDLLGNVLVMAKREGESIVEKHPNRGSSEVCIALARSFADIGDILRGKDMYVGYDEKEKNRRKQLENKLKDIFDNIYKDLTKKKGRNGKKSALQERYNDPKGDFFQLREDWWALNREDVWKALTCSADDSEDYFIQSEGVTKSFTNPKCGHGDNEVLTNLDYVPQFLRWFTEWAEEFCRIRKIKLGKVKNECRGETSGKRYCSGDGYDCTKTDISRNIFYMDLDCPRCEEECRKYDEWIENKENELDKQ…	2994	1	null	no	GO_0016021	GO_0020002, GO_0020030	GO_0016021,GO_0020002,GO_0020030	0	0	0	0	0	0	0	0	0	0	0	0	0	0	0	0	0	0	0	0	0	0	0	0	0	0	0	0	0	0	0	0	0	0	0	0	0
3356	PF3D7_1150400	erythrocyte membrane protein 1, PfEMP1	VAR	ATGGGGAATGCAATACCAGCGACTCCGGATCCAATTTTTATAAATGAAAGTTACAAGAGTGCCAGAAATGTTTTGGAAAATGTTGCAAGACTTATAAAAGCGAAAGCAACAAAAGATGTAAAAAGACATAGAAACGTTTTGAAAGGAAATTTGAGAAATGCCAAATTTTATCACCCTTTTTCTAAAGAAAGACCTTACTATAAAAGTGCCTGTGATCTTGATTATAGGTTTCATTCGAACATATGGAGTGGAGACAATACATATAGACATCCCTGTGCAGGTAGGAACAGAAATCGTTTTTCATATGAAGGTGAAGCAGAATGTCGTATTAGTAGAATAACTGGTAATAAAACGGAACATGGTGCATGTGCTCCTTATCGCAGGAGGCATTTATGTGAT…	MGNAIPATPDPIFINESYKSARNVLENVARLIKAKATKDVKRHRNVLKGNLRNAKFYHPFSKERPYYKSACDLDYRFHSNIWSGDNTYRHPCAGRNRNRFSYEGEAECRISRITGNKTEHGACAPYRRRHLCDYIFHQVNDNYIKTSDDLLGNLLVTAKYEGESIVNSYANSGMFNVCTALARSFADIGDIIRGKDLYLGNGDYKEKVSNNLRAIFNKIYENLNDPKLKKHYQKDAPNYYKLRDDWWNANREDVWKALTCNAPYEAQYFIKPSDKEHSFSSEYCGHYKNGDPLTNLDYVPQFLRWFEEWAEEFCRIKKIKLENVKNACRDEKKRKYCSLNGFDCTQTIWKKKVFGRGNDCTNCSFKCFPYEIWLGNQREAFRKQKEKYAKEIEAYVTNR…	3119	1	null	no	GO_0016021	GO_0020002, GO_0020030	GO_0016021,GO_0020002,GO_0020030	0	0	0	0	0	0	0	0	0	0	0	0	0	0	0	0	0	0	0	0	0	0	0	0	0	0	0	0	0	0	0	0	0	0	0	0	0
3357	PF3D7_1200100	erythrocyte membrane protein 1, PfEMP1	VAR	ATGGGGCCCCAGCCGGCTGTGACTGACTATAGTAAAGCCACAAATGTAAAGTATCTTTTTGATTTAATTGGAGAAACTGTACAGAAAAAAGCCAAGGAAAAAGCAGATGTTGCTTCTAGAAAATATTTTGAGGAATTGCATGGAGATTTGTCAAAAGCAACATATAAGAAAGATAAAAATCCTGAAGGAACAACACCACCAAACCCATGCAAACTCGAATATCAATATCACACTAATGTTACTAAAGGTGAGGATAAAGAGTATCCTTGTCTTGGTAGAAAAACAGTTCGTTTTTCTGATAAAGAAGGAGCAGAATGTTACAAGACAAAAATAAAAGATAGTACTACAGATACAGTAGGAGCATGTGCTCCGTATAGACGATTATATATGTGCGACAGA…	MGPQPAVTDYSKATNVKYLFDLIGETVQKKAKEKADVASRKYFEELHGDLSKATYKKDKNPEGTTPPNPCKLEYQYHTNVTKGEDKEYPCLGRKTVRFSDKEGAECYKTKIKDSTTDTVGACAPYRRLYMCDRNLEHIEPTKITTHNLLLDVCLAAQYEGQSISQNHGKHQLSYPDSPSQLCTELARSFADIGDIVRGRDLYRGNNRENDKLEKKLKGYFKKIYDNLVEKKKEEAETDYKDDAPDFYQLREDWWALNRQDVWKAITCDAHDSRYRKMGADGSITESAMRQCRNVADVPTNFDYVPQYLRWFEEWAEDFCRKRKHKLKDAIQKCRGQDGTGKDRYCDLNRYDCKRTISAKHELVQGEECKKCSVVCIPFGPWIDNQKQEFEKQKNKYTNE…	2178	0	null	no	GO_0016021	GO_0020002, GO_0020030	GO_0016021,GO_0020002,GO_0020030	0	0	0	0	0	0	0	0	0	0	0	0	0	0	0	0	0	0	0	0	0	0	0	0	0	0	0	0	0	0	0	0	0	0	0	0	0
3360	PF3D7_1200400	erythrocyte membrane protein 1, PfEMP1	VAR	ATGACATCATGTAGTCCGGAGAATACAAAAATGGCGCCCAAGACGCGTGCGTCTGACTATAAGGATGCCCAGGATGCTAAGCATCTTTTGGATATGATTGGAGAAGTTGTACAAAAACAAGCTTATAGTGAAGCTCTAACGCGTGGTAGGAGTGCGTTGCAAGGACGTTTGTCAGATGCAAGATTTCTACATGGTACATCGTGGGAACAAGCAAACCAAAATGTATGTAGTCTAAAACATACACATGATACTAATGTTAGGTGGGGTGTCATTCATCCGTGTGATAACAGATTAGGGAATCTTTATTCCGAAGAAAGTGCAAGCCAATGTTCTACCAGCAGAATTAGTGGCAACAACTCTGATTCTGGATCCTGCGCTCCATACAGAAAATTACAATTA…	MTSCSPENTKMAPKTRASDYKDAQDAKHLLDMIGEVVQKQAYSEALTRGRSALQGRLSDARFLHGTSWEQANQNVCSLKHTHDTNVRWGVIHPCDNRLGNLYSEESASQCSTSRISGNNSDSGSCAPYRKLQLCDYNLEKITDANVTNTHNLLVDVLLAAKHEGDSLSKYMKENPKIIPKSNVCTVLARSFADIGDIIRGKDLYVGNRKEKEKEKLQKNLKNIFAKIHSGLTKKGAEARYKDNDENYYQLREDWWEANRAKVWEAMTCSVEDAYYFRQTCGGEKTASTNKCRCVNTDPPTYFDYVPQYLRWFEEWAEEFCRIKELKLENVKTRCRGEKDGEKYCSRNGYDCTGTIIKRNIFRPDPECTNCLFECNHYQDWIDNKKKEFEKQKKKCEKEI…	2860	0	null	no	GO_0016021	GO_0020002, GO_0020030	GO_0016021,GO_0020002,GO_0020030	0	0	0	0	0	0	0	0	0	0	0	0	0	0	0	0	0	0	0	0	0	0	0	0	0	0	0	0	0	0	0	0	0	0	0	0	0
3362	PF3D7_1200600	erythrocyte membrane protein 1, PfEMP1	VAR2CSA	ATGGATAAATCAAGTATTGCTAACAAAATTGAAGCATATTTAGGTGCAAAATCCGATGATTCTAAAATAGACCAATCGTTGAAAGCTGATCCTAGTGAAGTGCAGTACTATGGAAGTGGAGGTGATGGATATTACTTAAGAAAAAATATTTGCAAAATTACCGTGAATCATTCAGATTCTGGAACAAATGATCCTTGTGATAGAATACCACCTCCTTATGGCGATAATGACCAATGGAAATGTGCCATAATTTTATCTAAAGTAAGTGAAAAACCTGAAAATGTATTTGTTCCTCCGAGAAGACAACGTATGTGCATTAACAATTTAGAAAAATTAAATGTTGATAAAATTAGGGATAAACATGCATTTTTGGCAGATGTATTACTTACGGCCAGAAAT…	MDKSSIANKIEAYLGAKSDDSKIDQSLKADPSEVQYYGSGGDGYYLRKNICKITVNHSDSGTNDPCDRIPPPYGDNDQWKCAIILSKVSEKPENVFVPPRRQRMCINNLEKLNVDKIRDKHAFLADVLLTARNEGERIVQNHPDTNSSNVCNALERSFADIADIIRGTDLWKGTNSNLEQNLKQMFAKIRENDKVLQDKYPKDQNYRKLREDWWNANRQKVWEVITCGARSNDLLIKRGWRTSGKSNGDNKLELCRKCGHYEEKVPTKLDYVPQFLRWLTEWIEDFYREKQNLIDDMERHREECTSEDHKSKEGTSYCSTCKDKCKKYCECVKKWKSEWENQKNKYTELYQQNKNETSQKNTSRYDDYVKDFFKKLEANYSSLENYIKGDPYFAEYATK…	3056	0	null	no	GO_0016021	GO_0020002, GO_0020030	GO_0016021,GO_0020002,GO_0020030	0	0	0	0	0	0	0	0	0	0	0	0	0	0	0	0	0	0	0	0	0	0	0	0	0	0	0	0	0	0	0	0	0	0	0	0	0
3546	PF3D7_1219300	erythrocyte membrane protein 1, PfEMP1	VAR	ATGGTGGCAGCGGCCAAAGGTGGAGGTAGTTCACAGGATGCCAAACATGTATTGGATGAAATTGGAAAAGATGTGTACGAAACAGTGGAAAAGGATGCTAAAATATATAAAGAGGCGTTGAAAGGAAATTTGCAGCATGCAAAAGGTATGGGGGAAAGAGCTAGCAGCAATAAAACATGCACACTTGTAAAAGAATATTATGAGCACTTTAATGGTGATGCTAACAGTAACAGGTATCCGTGCAAAGAGTTAAGTGGAAAAATGGGTGAAAACCGTTTTTCGGATACACTTGGTGGCCAGTGTACTAACAAAAAAATAGAAGGTAATAAAAACAATTGTGGTGCTTGCGCTCCATACCGACGTCTACATTTATGTCATCATAATTTGGAATCTATAGAC…	MVAAAKGGGSSQDAKHVLDEIGKDVYETVEKDAKIYKEALKGNLQHAKGMGERASSNKTCTLVKEYYEHFNGDANSNRYPCKELSGKMGENRFSDTLGGQCTNKKIEGNKNNCGACAPYRRLHLCHHNLESIDTTSTTSDTLLAEVCYAAKFEGETLTTQHGQHQQTNPGTASQLCTVLARSFADIGDIVRGKDLFLGNDEEKKKRDELEENLQKIFAKIHSGLTSTRGKQNGELQKRYKGDAKKNFYQLREDWWDANRHTVWEAITCGAGESDKYFRQTACGTGTPTHKQCRCDDKANVDPPTYFDYVPQYLRWFEEWAEDFCRKKNKKLKDVKTNCRGDSGTDRYCSGNGYDCTQTIRAIGKLVIGEHCTNCSVWCRLYEKWIDNQKLEFLKQRNKY…	2256	0	null	no	GO_0016021	GO_0020002, GO_0020030	GO_0016021,GO_0020002,GO_0020030	0	0	0	0	0	0	0	0	0	0	0	0	0	0	0	0	0	0	0	0	0	0	0	0	0	0	0	0	0	0	0	0	0	0	0	0	0
3748	PF3D7_1240300	erythrocyte membrane protein 1, PfEMP1	VAR	ATGGTACGGTCGTCATCGCGTGCTTCTCGGCCTAAGTATTATCAAGCCACTAGTGCGAAGGAGCTTTTGGATCAAATTGGACAAAGTGTTCACGCAGAAGTACAAAGAGATGCTAAAAAATATGTAAGTGAATTGAAAGGAAATTTGTCAAGAGCAACATATCCAAAAGATGAATCCCCTAAAGGAACGACATCACCGGATCCATGCCATCTTGATTATAGATATCATACTAATGTTACCAAGGGACATGGTAAGGAGTATCCTTGTGAAGATAGACCAGAAGTTCGATTTTCTGATACAGAAGGAGCACAATGTGATAAGAGTAAAATAAAAGATAATAAAGGTAAAAGTGAAGGTGCATGTGCTCCATACCGACGCTCGTCTCTATGTGATCATCAT…	MVRSSSRASRPKYYQATSAKELLDQIGQSVHAEVQRDAKKYVSELKGNLSRATYPKDESPKGTTSPDPCHLDYRYHTNVTKGHGKEYPCEDRPEVRFSDTEGAQCDKSKIKDNKGKSEGACAPYRRSSLCDHHLSYMNAGKTNTTDNLLLEVCMAAQYEGQSIRGQHDKHKLDNNNSSSQLCTVLARSFADIGDIIRGRDLYRRDKGEETKLEKNLKEIFKNIYNELTTKNGTKERYNDTDNYFQLREDWWEENRETVWKAITCHVVSGNNYFRHTCSDENHPTATQGNCRCIGATVPTYFDYVPQYLRWFEEWAEDFCRKKKKKLPNVKTNCRGENNKKYCSGDGFDCTKTIRAKYIYAIGDECTKCSFWCGFYKKWLENQKQEFLKQKKKYETEISG…	2646	0	null	no	GO_0016021	GO_0020002, GO_0020030	GO_0016021,GO_0020002,GO_0020030	0	0	0	0	0	0	0	0	0	0	0	0	0	0	0	0	0	0	0	0	0	0	0	0	0	0	0	0	0	0	0	0	0	0	0	0	0
3749	PF3D7_1240400	erythrocyte membrane protein 1, PfEMP1	VAR	ATGGCGCCATCCACTACATACAGTAGTGCCAAAAATGCCAAGGAACTTTTGGATATGATTGGGAAAGACGTGTACAATGAAAAAGTGAAAAGTGAAGCTCAAACATATAAAGAGGCGTTGAAAGGAGATTTGAACACAGCAAATGGTTATAATTCGGAAACACGTGGCACCACAGATCCATGCAGACTTGTAGAGGATTATCGTAGTAAGGCTATTGGTGATGCTAACAGTGAACGGCATCCGTGCGGAATAGGAAAAGATGCAAAAGGAGAAGAAGTACCACGTTTTTCGGATACACTTGGTGGCCAATGCACTGATCATAGAATAAAAGGTAATAATCGTAATGTAACTGGTGGAGCATGTGCTCCACTCAGACGATTACATGTATGCAACAAAAAT…	MAPSTTYSSAKNAKELLDMIGKDVYNEKVKSEAQTYKEALKGDLNTANGYNSETRGTTDPCRLVEDYRSKAIGDANSERHPCGIGKDAKGEEVPRFSDTLGGQCTDHRIKGNNRNVTGGACAPLRRLHVCNKNMEKMDSTKIKDKNVLLAEVCYAAKYEGKSLVEKYKEYKQPNNDSDTDICTALARSFADIGDIVRGKDLYLGYDDEEKKQRDELEENLKTIFKNIYGNLDKKDRYEGDTKNYYQLREDWWYANRRQVWKAITCDAKAFNYFRNTCNGESPTKGYCRCNDDQPNADKPNTDPPTYFDYVPQYLRWFEEWAEDFCRKKNKKLNDVKKQCRGDNGTDRYCSGNGYDCTKTIRAIGKYAIGDECTKCSFWCRMYETWIDNQKKEFLKQKRK…	2287	0	null	no	GO_0016021	GO_0020002, GO_0020030	GO_0016021,GO_0020002,GO_0020030	0	0	0	0	0	0	0	0	0	0	0	0	0	0	0	0	0	0	0	0	0	0	0	0	0	0	0	0	0	0	0	0	0	0	0	0	0
3750	PF3D7_1240600	erythrocyte membrane protein 1, PfEMP1	VAR	ATGGGTCCCCCGTCGACTGCGCCTGACTATAGTAGTGCCAAAGATGCAAAGGAACTTTTGGATAAAATTGGGCAACAAGTGCACGACAAAGTGAAAAGTGAATCAAATGGTTTTAAAGATGAATTGGAAGGAAGTTTGTCACTAGCAAAAGTTTCCGGTGTGGAATTAGCTGACACCCTTGATCCGTGCAAACTTATAAAAGAAAAACATGAGAACCTTATTGGTGCTCGCGGTGATCCGTGCGGAAAGGATGGAACAGGAAAAGAAGACGATTCAAAACGTTTTTCTAAAGAAAGTGGCGCTGAATGTGATGAGAAAAAAATAAAAGATAATAAAAGTAAAGGAGGTAATAATGAAGGAGCGTGTGCTCCATATAGACGATTATCTCTATGTAACAAA…	MGPPSTAPDYSSAKDAKELLDKIGQQVHDKVKSESNGFKDELEGSLSLAKVSGVELADTLDPCKLIKEKHENLIGARGDPCGKDGTGKEDDSKRFSKESGAECDEKKIKDNKSKGGNNEGACAPYRRLSLCNKNMEKMGRTSTTKHDLLLDVCMAANYEAESLIPYHDQYEATYKDYGSTMCTMLARSFADIGDIIRGRDLYSGNKVKKKKLDDSLKTIFGKIYEGLTGGVKERYTNDGGDFFQLREDWWTANRETVWKAMTCSEHLKNSAYFRVTCSDKQGESIANHKCRCPMTSDGKPNDQVPTYFDYVPQYLRWFEEWAEDFCRKKKIYVGIVKKYCLDETEEKYCSLNGCDCTQTVRAKGKLRYGNRCTDCLFACHRYEKWIDNQRKQFLKQRNK…	2359	0	null	no	GO_0016021	GO_0020002, GO_0020030	GO_0016021,GO_0020002,GO_0020030	0	0	0	0	0	0	0	0	0	0	0	0	0	0	0	0	0	0	0	0	0	0	0	0	0	0	0	0	0	0	0	0	0	0	0	0	0
3886	PF3D7_1255200	erythrocyte membrane protein 1, PfEMP1	VAR	ATGGGGGGAAGTAATGGCGGTGGCGGTAGTTCACAGGAGCAGGATGAAAGTGTCAAACATATGTTTGATAGGATAGGGCAACAAGTGCACGACGAAGTGAAGAATGGTGGTGCTGATGCTAAAAAATATGTAGGTGAATTGGAAGGAAGTTTATCACAAGTAAGTATTAATTTGGAATCAGCTGGCACCACAGATACATGCAACCTTGTAAAAGAATATTATAAGCATCCTAATGGTGGTGGTGATGTTAGCGATAAAAGGTATCCGTGCAAAGGGTTAAGTGAAAAATATGTAGAACGTTTTTCTGATAAAATTGGTGGCCAGTGTACTAAGGAAAAAATAAGTGGCAGTACAAATACATGTGGTGCTTGTGCACCATACCGACGTCTACATTTATGT…	MGGSNGGGGSSQEQDESVKHMFDRIGQQVHDEVKNGGADAKKYVGELEGSLSQVSINLESAGTTDTCNLVKEYYKHPNGGGDVSDKRYPCKGLSEKYVERFSDKIGGQCTKEKISGSTNTCGACAPYRRLHLCHHNLESIQTKNYNSSNAKHDLLAEVCMAAKYEGETLTTEHGKHQQTNNDSQICTVLARSFADIGDIVRGRDLFHGNPQESAQRKVLDEKLKEIFKEIHSGLTKKDAQTYYDENGGNFFKLREDWWTANRHTVWEAMTCHAGDSDEYFRKTCGSGNNATQAKDKCRCSDNQVPTYFDYVPQYLRWFEEWAEDFCRLRKHKLKDAIDKCRGGSSNDKYCSGNGFDCVETVRGDEHFVEKDCHDCSYSCSPFVKWIDNQKLELDKQKKK…	2268	0	null	no	GO_0016021	GO_0020002, GO_0020030	GO_0016021,GO_0020002,GO_0020030	0	0	0	0	0	0	0	0	0	0	0	0	0	0	0	0	0	0	0	0	0	0	0	0	0	0	0	0	0	0	0	0	0	0	0	0	0
3889	PF3D7_1300300	erythrocyte membrane protein 1, PfEMP1	VAR	ATGGGGAATACACAATCATCAGAGGAAGAGGAAGCTAAAAGCCCTAGTTTAACAGAAAGTCACAACAGTGCAAGGGGTGTTTTGGAAGAAATTGGAAAAAAGATAAAAGATAAGACAGAAAAAGAGAGTAAACATGTAAGGCAATTGAAAGGAAAATTATCAAATGCAAAATTTGCTGATCGATTGTATAAGGAATCTGGTGGTGATTTAAGGTCTGCTTATTCAGATGCTTGTTCACTTACATACAAATTTCATACTAATATAACAACTGATGGGGGGGATGGAAGGCATCCTTGTCATGGTAGGGAAAACAATCGTTTTTCTGAAAGTCAAGAATATGGATGTAGTAATGTATACATAAAAGGAAATGAAAATAACAGTAATGGTACAGCATGTGTA…	MGNTQSSEEEEAKSPSLTESHNSARGVLEEIGKKIKDKTEKESKHVRQLKGKLSNAKFADRLYKESGGDLRSAYSDACSLTYKFHTNITTDGGDGRHPCHGRENNRFSESQEYGCSNVYIKGNENNSNGTACVPPRRRHICDQNLEFLDNPHTDDTDDLLGNVLVTAKYEGNYIVSNHPDKNSNGNKSGICTSLARSFADIGDIVRGRDMFKSNEKVEIGLKKVFEKINNGLKKIGINDYNDISGNYYKLREAWWTANRDQVWKAITCRAPNGANYFRKGLDGKIIFSDNGPCGRKELIVPTYLDYVPQFLRWLNEWSEEFCRIKNIKIGNIKKSCTGESNNKHCSREGYDCNKTNLRLNEIFMDLECPRCADDCKSYETWVEKKKKEFNKQKKKYEKE…	3346	0	null	no	GO_0016021	GO_0020002, GO_0020030	GO_0016021,GO_0020002,GO_0020030	0	0	0	0	0	0	0	0	0	0	0	0	0	0	0	0	0	0	0	0	0	0	0	0	0	0	0	0	0	0	0	0	0	0	0	0	0
3095	PF3D7_1123500	conserved Plasmodium protein, unknown function	null	ATGAATATTTTTAAAAGATATATATTTTTTTTATGTTCGTTTTATTTATTATATGTAACATGTTCATCCAATAATAATAATAGTAATAATAATAATAATAATTTCAGTAATATTAACAATAATAATAGTAATAATGGTATACATAATGATAATACGAAAAATAGGCCTGCTGCAGGCTCTTTAAAGAATATGGAAGACCTTTTATCTTATTTTAAGGAACATACAAATAATAATAATAATAATGATAATCATGTGGAACTATTTAAAAATTTTTTGAATACAAATAAAGAATCATCAGGTTCTAATATAAACACCTTAATGAAGTTCTTAAATTCATCGACTAAAAATGATAACACAGGTAACAATCATTTAGATATTGGAAAATTGTTAGATACTTTA…	MNIFKRYIFFLCSFYLLYVTCSSNNNNSNNNNNNFSNINNNNSNNGIHNDNTKNRPAAGSLKNMEDLLSYFKEHTNNNNNNDNHVELFKNFLNTNKESSGSNINTLMKFLNSSTKNDNTGNNHLDIGKLLDTLKEFNNANKNNNVPSGNNPNNQTTNPANNNNNNNNLNKDNYVQIFGDLLKNMNIPSNNNNNNNNNNNNNNNNNNNNNNNSSNNNSSSNNNNSSSNNNNSSNNNNNNAKAANPMEQLTNLFSHINNNDHHDEKGDGHPLEHIMNLFGQGHNNGDAKGGNNPLEHLTSLLGQGHNDGDGKGGNNPLEHLKKIFDQGHNDGDGKGGSNPLEHLTSLLSQGHNDGDGKGGNNPLQHLTSLLSQGHNNGDGKGGSNPLEHLTSLLSQGHNDG…	1336	2	HMM: MNIFKRYIFFLCSFYLLYVTCSSN, NN: MNIFKRYIFFLCSFYLLYVTCSSN	yes	GO_0016020	GO_0020003	GO_0016020,GO_0020003	0	0	0	0	0	0	0	0	0	0	0	0	0	0	0	0	0	0	0	0	0	0	0	0	0	0	0	0	0	0	0	0	0	0	0	0	0
3193	PF3D7_1133400	apical membrane antigen 1	AMA1	ATGAGAAAATTATACTGCGTATTATTATTGAGCGCCTTTGAGTTTACATATATGATAAACTTTGGAAGAGGACAGAATTATTGGGAACATCCATATCAAAATAGTGATGTGTATCGTCCAATCAACGAACATAGGGAACATCCAAAAGAATACGAATATCCATTACACCAGGAACATACATACCAACAAGAAGATTCAGGAGAAGACGAAAATACATTACAACACGCATATCCAATAGACCACGAAGGTGCCGAACCCGCACCACAAGAACAAAATTTATTTTCAAGCATTGAAATAGTAGAAAGAAGTAATTATATGGGTAATCCATGGACGGAATATATGGCAAAATATGATATTGAAGAAGTTCATGGTTCAGGTATAAGAGTAGATTTAGGAGAA…	MRKLYCVLLLSAFEFTYMINFGRGQNYWEHPYQNSDVYRPINEHREHPKEYEYPLHQEHTYQQEDSGEDENTLQHAYPIDHEGAEPAPQEQNLFSSIEIVERSNYMGNPWTEYMAKYDIEEVHGSGIRVDLGEDAEVAGTQYRLPSGKCPVFGKGIIIENSNTTFLTPVATGNQYLKDGGFAFPPTEPLMSPMTLDEMRHFYKDNKYVKNLDELTLCSRHAGNMIPDNDKNSNYKYPAVYDDKDKKCHILYIAAQENNGPRYCNKDESKRNSMFCFRPAKDISFQNYTYLSKNVVDNWEKVCPRKNLQNAKFGLWVDGNCEDIPHVNEFPAIDLFECNKLVFELSASDQPKQYEQHLTDYEKIKEGFKNKNASMIKSAFLPTGAFKADRYKSHGKGYNW…	622	1	HMM: MRKLYCVLLLSAFEFTYMINFGRGQ, NN: MRKLYCVLLLSAFEFTYMINFGRGQ	yes	GO_0016020	GO_0020007, GO_0016021, GO_0020009, GO_0005886	GO_0016020,GO_0020007,GO_0016021,GO_0020009,GO_0005886	0	0	0	0	0	0	0	0	0	0	0	0	0	0	0	0	0	0	0	0	0	0	0	0	0	0	0	0	0	0	0	0	0	0	0	0	0
3336	PF3D7_1147800	membrane associated erythrocyte binding-like protein	MAEBL	ATGGGGGTATTGAAACATTTTTTCTTTTTGTTATTTCTGTATGTTAATAATACGAGTGCTATCAATAATCCTCAAGAGGAGTTTATGGACAGATTTGATATAAATAAGAATCATGTGAATATAAAATGGTCAAACTCTGGGATACATGGAAAGGGGAAATTCAAATATGAAATTGAAGAAAGAGACGTACTTTCAGAAGGGAATGAATCCGAAAAATCGACTATTTGCCCAAATCATGTAAAAGAAGGAACTTACAAACTCGGTTGTCCCGATTATGGGAAAACTTTTTTGATGGGTTTTGAGGATAATAAATATAGTGAAGAGTTTTTAAATGAAATAAGTTTTGGTTTTTTGAATAAAAAATATAAACTTCCTATAGAAATTCCTTTGAACAAAAGT…	MGVLKHFFFLLFLYVNNTSAINNPQEEFMDRFDINKNHVNIKWSNSGIHGKGKFKYEIEERDVLSEGNESEKSTICPNHVKEGTYKLGCPDYGKTFLMGFEDNKYSEEFLNEISFGFLNKKYKLPIEIPLNKSGLSMYQGLFKRCPYNKKHYSMIKNENEYDMCFRKFYNNSNISTRIYKRGKQNRKYIYFSSHGLGGRLGANIEEPLHKYKNDEHYVTKKMRYPEKIKNLFDCSIYSHCIGPCLYKDFNNSCFLNLPILFNHQTKECVIIGTHEEKRIHNCQSGSTDQNIQRCFLPVKKEKGNQWTYASSFIRTDYMTKCPPRFPLNHTMFGYFNYSTGKCETYYMNHEKRTLSFSKCIETLFNNIKKQDDVNNSSFLWGVWTIENNANEKTNLASMD…	2055	1	HMM: MGVLKHFFFLLFLYVNNTSAI, NN: MGVLKHFFFLLFLYVNNTSAI	yes	GO_0016020	GO_0020007, GO_0020008	GO_0016020,GO_0020007,GO_0020008	0	0	0	0	0	0	0	0	0	0	0	0	0	0	0	0	0	0	0	0	0	0	0	0	0	0	0	0	0	0	0	0	0	0	0	0	0
4626	PF3D7_1404300	secreted ookinete adhesive protein, putative	SOAP	ATGAAAAATTTTACTTGTTTTTTTCTTTTAACACTCCTTCTTACGTTAGCATACGGTAAAGGAGTAAGAAACAAATCCGAAAATAGAACTCCATATGTTCATTACCATAATAATAGTAATATAAAGAATTATTCAGCTGTAGATATATTCTCACCCAAAAAAACTGGAAAGGAATGTATTAAATGTCTCCCAGATAATTTTTGTGAATGCGAATGTAGTTGTAAAAATAAAACAGGTTTTTCAATGAAATATAGACATGCCAGTAAGGGATCTAAAGGATATAGTAAAAAAATGACAAAGACATCTTCTCGTTCCAGACAATGTAACGACTTGCCACTTGAAAAATCAGAACAAGAAACCGAACCGGAATTGGAACCTGAAGTGGAACCTGAAGTAGAA…	MKNFTCFFLLTLLLTLAYGKGVRNKSENRTPYVHYHNNSNIKNYSAVDIFSPKKTGKECIKCLPDNFCECECSCKNKTGFSMKYRHASKGSKGYSKKMTKTSSRSRQCNDLPLEKSEQETEPELEPEVEPEVEPEVEPEVEPEVEPEVEPEVEPEVEPEVDPEVDPENDQGTGSQNNITECYSSCKSVTGVQTEECSCSCSC	202	0	HMM: MKNFTCFFLLTLLLTLAYGK, NN: MKNFTCFFLLTLLLTLAYGK	yes	GO_0016020	GO_0020009	GO_0016020,GO_0020009	0	0	0	0	0	0	0	0	0	0	0	0	0	0	0	0	0	0	0	0	0	0	0	0	0	0	0	0	0	0	0	0	0	0	0	0	0
18	PF3D7_0102500	erythrocyte binding antigen-181	EBA181	ATGAAAGGGAAAATGAATATGTGTTTGTTTTTTTTCTATTCTATATTATATGTTGTATTATGTACCTATGTATTAGGTATAAGTGAAGAGTATTTGAAGGAAAGGCCCCAAGGTTTAAATGTTGAGACTAATAATAATAATAATAATAATAATAATAATAATAGTAATAGTAACGATGCGATGTCTTTTGTAAATGAAGTAATAAGGTTTATAGAAAACGAGAAGGATGATAAAGAAGATAAAAAAGTGAAGATAATATCTAGACCTGTTGAGAATACATTACATAGATATCCAGTTAGTTCTTTTCTGAATATCAAAAAGTATGGTAGGAAAGGGGAATATTTGAATAGAAATAGTTTTGTTCAAAGATCATATATAAGGGGTTGTAAAGGAAAAAGA…	MKGKMNMCLFFFYSILYVVLCTYVLGISEEYLKERPQGLNVETNNNNNNNNNNNSNSNDAMSFVNEVIRFIENEKDDKEDKKVKIISRPVENTLHRYPVSSFLNIKKYGRKGEYLNRNSFVQRSYIRGCKGKRSTHTWICENKGNNNICIPDRRVQLCITALQDLKNSGSETTDRKLLRDKVFDSAMYETDLLWNKYGFRGFDDFCDDVKNSYLDYKDVIFGTDLDKNNISKLVEESLKRFFKKDSSVLNPTAWWRRYGTRLWKTMIQPYAHLGCRKPDENEPQINRWILEWGKYNCRLMKEKEKLLTGECSVNRKKSDCSTGCNNECYTYRSLINRQRYEVSILGKKYIKVVRYTIFRRKIVQPDNALDFLKLNCSECKDIDFKPFFEFEYGKYEEKC…	1567	2	HMM: MKGKMNMCLFFFYSILYVVLCTYVLGI, NN: MKGKMNMCLFFFYSILYVVLCTYVLGI	yes	GO_0016021	GO_0020009	GO_0016021,GO_0020009	0	0	0	0	0	0	0	0	0	0	0	0	0	0	0	0	0	0	0	0	0	0	0	0	0	0	0	0	0	0	0	0	0	0	0	0	0
1749	PF3D7_0731500	erythrocyte binding antigen-175	EBA175	ATGAAATGTAATATTAGTATATATTTTTTTGCTTCCTTCTTTGTGTTATATTTTGCAAAAGCTAGGAATGAATATGATATAAAAGAGAATGAAAAATTTTTAGACGTGTATAAAGAAAAATTTAATGAATTAGATAAAAAGAAATATGGAAATGTTCAAAAAACTGATAAGAAAATATTTACTTTTATAGAAAATAAATTAGATATTTTAAATAATTCAAAATTTAATAAAAGATGGAAGAGTTATGGAACTCCAGATAATATAGATAAAAATATGTCTTTAATAAATAAACATAATAATGAAGAAATGTTTAACAACAATTATCAATCATTTTTATCGACAAGTTCATTAATAAAGCAAAATAAATATGTTCCTATTAACGCTGTACGTGTGTCTAGG…	MKCNISIYFFASFFVLYFAKARNEYDIKENEKFLDVYKEKFNELDKKKYGNVQKTDKKIFTFIENKLDILNNSKFNKRWKSYGTPDNIDKNMSLINKHNNEEMFNNNYQSFLSTSSLIKQNKYVPINAVRVSRILSFLDSRINNGRNTSSNNEVLSNCREKRKGMKWDCKKKNDRSNYVCIPDRRIQLCIVNLSIIKTYTKETMKDHFIEASKKESQLLLKKNDNKYNSKFCNDLKNSFLDYGHLAMGNDMDFGGYSTKAENKIQEVFKGAHGEISEHKIKNFRKKWWNEFREKLWEAMLSEHKNNINNCKNIPQEELQITQWIKEWHGEFLLERDNRSKLPKSKCKNNTLYEACEKECIDPCMKYRDWIIRSKFEWHTLSKEYETQKVPKENAENYLI…	1502	1	HMM: MKCNISIYFFASFFVLYFAKAR, NN: MKCNISIYFFASFFVLYFAKAR	yes	GO_0016021	GO_0020009	GO_0016021,GO_0020009	0	0	0	0	0	0	0	0	0	0	0	0	0	0	0	0	0	0	0	0	0	0	0	0	0	0	0	0	0	0	0	0	0	0	0	0	0
2999	PF3D7_1114100	rhomboid protease ROM1	ROM1	ATGAGTAATATTCATACGCTAGCAGAGTATCGAGATGATTATGCCGAAAATACACCCTTCAACAGAACGCCAGATTATTATCAGTCTCAGAGTAGTTTTGTTCAAAGGTCTAAACCAATTGATTTATTGAACCTTATATTTCCCCACTTTACATGGAAAAGTTTTATGGTCGTTATTTCTATTATACAGTTGATTGTTTTTATCATATCAGTGAGTATAAAACCAGCAGACTTCCTTACCCCTTCAGATAGCTTATTAGTAACCCTTGGTGCGAATGTTGCGTCGAGAATAAAACAGGGAGAAATTCACAGATTGATTTTACCCATATTTTTACATGCAAATATATTCCATGCAATTTTTAATATTTTTTTTCAATTAAGAATGGGATTTACATTAGAA…	MSNIHTLAEYRDDYAENTPFNRTPDYYQSQSSFVQRSKPIDLLNLIFPHFTWKSFMVVISIIQLIVFIISVSIKPADFLTPSDSLLVTLGANVASRIKQGEIHRLILPIFLHANIFHAIFNIFFQLRMGFTLEKNYGIMKIIILYFVTGMYGNILSSSITYCPIKVGASTSGMGLVGIVTSELILLWHIIRHRERVVFNIIFFSLISFFYYFTFNGSNIDHVGHLGGLISGISLGILYNEHMDNKPRWYNHLKIGSYISLVLLAIIPTVVLFTIPRTC	278	7	null	no	GO_0016021	GO_0020009	GO_0016021,GO_0020009	0	0	0	0	0	0	0	0	0	0	0	0	0	0	0	0	0	0	0	0	0	0	0	0	0	0	0	0	0	0	0	0	0	0	0	0	0
3899	PF3D7_1301600	erythrocyte binding antigen-140	EBA140	ATGAAAGGATATTTTAATATATATTTTTTAATTCCTTTAATTTTTTTATATAATGTAATAAGAATAAATGAATCAATTATAGGTAGAACACTTTATAATAGACAAGATGAATCATCAGATATTTCAAGGGTAAATTCACCCGAATTAAATAATAATCATAAAACTAATATATATGATTCAGATTACGAAGATGTAAATAATAAATTAATAAACAGTTTTGTAGAAAATAAAAGTGTGAAAAAAAAAAGGTCTTTAAGTTTTATAAATAATAAAACAAAATCATATGATATAATTCCACCTTCATATTCATATAGGAATGATAAATTTAATTCACTTTCCGAAAATGAAGATAATTCTGGAAATACAAATAGTAATAATTTCGCAAATACTTCTGAAATA…	MKGYFNIYFLIPLIFLYNVIRINESIIGRTLYNRQDESSDISRVNSPELNNNHKTNIYDSDYEDVNNKLINSFVENKSVKKKRSLSFINNKTKSYDIIPPSYSYRNDKFNSLSENEDNSGNTNSNNFANTSEISIGKDNKQYTFIQKRTHLFACGIKRKSIKWICRENSEKITVCVPDRKIQLCIANFLNSRLETMEKFKEIFLISVNTEAKLLYNKNEGKDPSIFCNELRNSFSDFRNSFIGDDMDFGGNTDRVKGYINKKFSDYYKEKNVEKLNNIKKEWWEKNKANLWNHMIVNHKGNISKECAIIPAEEPQINLWIKEWNENFLMEKKRLFLNIKDKCVENKKYEACFGGCRLPCSSYTSFMKKSKTQMEVLTNLYKKKNSGVDKNNFLNDLFKK…	1210	1	HMM: MKGYFNIYFLIPLIFLY, NN: MKGYFNIYFLIPLIFLYNVIRINESI	yes	GO_0016021	GO_0020009	GO_0016021,GO_0020009	0	0	0	0	0	0	0	0	0	0	0	0	0	0	0	0	0	0	0	0	0	0	0	0	0	0	0	0	0	0	0	0	0	0	0	0	0
2482	PF3D7_1002300	conserved Plasmodium protein, unknown function	null	ATGTCTTCAGTACTCAGGACGATATTAATCGCTTCCTTCTTTTACTATTTTTCAATTTATAAAATTTCCCCCTGGGCAATAATAAAAAATGTAGATTTTCAAATTACTTATGATGAACTATCAAGAAATTTATACATTCATAGTTCAGGTAAAGGAAAGTGCACCAGTCATAATTATTACATAAATGATAAGTGTAAAATTATTAACACTTCTAAAAAGACAAATGAAAATAATAAAGCACAATGTCTATATAACCAAAAATGTTTAACAATAGCAAAATATATTTTCCAACATACTGGAATAGAAGCAGTAACTGAAGATATATTTCTCCAACCATTTGTTATAAACAACAAATTGAATATATTACAAAAGGAAAAATGTAATAGGGAAGTATATATA…	MSSVLRTILIASFFYYFSIYKISPWAIIKNVDFQITYDELSRNLYIHSSGKGKCTSHNYYINDKCKIINTSKKTNENNKAQCLYNQKCLTIAKYIFQHTGIEAVTEDIFLQPFVINNKLNILQKEKCNREVYINDKIKCLCCINDVVKNIQGDENEKIKENVTYQYNKCKCLLNYQDIYGDSNFFNKCENFECNNGLCTIQANGQPFCSCFENYYFEKKSNTCKKHEQNVENIHHINSNRDIIENTENDTRTIVSIKNNPPNYNNSHNYNNANNIIHNIEDLEEHNKSSNITTNGNTIISQRNYNSCPLNQIKNKKGICETIINYEETVCLRIDCSISTNEFQCFCTNVNGEHIKTDTFDVSYINICTLNNINCNNGICNNILIKDELGCICDENYIYD…	430	2	null	no	GO_0005576	GO_0020011	GO_0005576,GO_0020011	0	0	0	0	0	0	0	0	0	0	0	0	0	0	0	0	1	0	0	0	0	0	0	0	0	0	0	0	0	0	0	0	0	0	0	0	0
4936	PF3D7_1436100	conserved Plasmodium membrane protein, unknown function	null	ATGATAAGAACACGCATAGTCTTTGAGAGGATCTTTTTTCTTATAATATTTTCAGGAATTGTTTACTTTTTCCTTGATTTTATGACCGTATATGAAAGCTCGATAAGATATTTAAGTTTTCTTTTACTTCTTTTTATTTATGGCGTTTCCTATATCCTAGCTATAATTCCCGATATTGCAAATTCTATAAATTATATTTCATTTTACAAAACTAGGAAAAAGAAGGTTCTTTCCTATTCTTTTAAAAAGGATATATTTTGTGAAAAGAAAAAGAAAAAAAAGATAAGTAATAAAGACCTAGAAATTCATAATTTAATAGACACGAATTTTTTTTATATCAATCCTGGAGTTATTGAAAAAGAATATTATGAGAAAAAAAATGAATTTAACGATGCTTAT…	MIRTRIVFERIFFLIIFSGIVYFFLDFMTVYESSIRYLSFLLLLFIYGVSYILAIIPDIANSINYISFYKTRKKKVLSYSFKKDIFCEKKKKKKISNKDLEIHNLIDTNFFYINPGVIEKEYYEKKNEFNDAYMYYLKHIKYMQKRDRKHGDQTNTNNYINSKEGMNDEDFNSNINNRVHDNINYKKDRKEDIYKNDDNYSDNNMYGMNKKENKEHKKYIIDNCEEFEKICFNDQGKKIKIKDKIIRYIELSNNNNKNNNSNNNNNNNNNNNNNNNNNNNNNNNNSNSVNVKKIDEKENSHVNQNNYVLEEGNKKTKKNVSYKSYAYDEKTRKVQNIYEIHNEGLSIYNEMIGKHDNSLMHYKKKDTKKMIGSFLHEKIYLDDENDLSSDEDIEYINKK…	1949	5	HMM: MIRTRIVFERIFFLIIFSGIVYFFLDFMTVYESSIRYLSFLLLLFIYGVSYILAI, NN: MIRTRIVFERIFFLIIFSGIVYFF	yes	GO_0005576	GO_0020011	GO_0005576,GO_0020011	0	0	0	0	0	0	0	0	0	0	0	0	0	0	0	0	1	0	0	0	0	0	0	0	0	0	0	0	0	0	0	0	0	0	0	0	0
1115	PF3D7_0529000	conserved Plasmodium protein, unknown function	null	ATGTATAATTTTTTATCATGCAAAAAGAAAAGTATAATTCTACAAGTTCTGTTGATTATATGTACCTATAACATTCTTTTAAATTTTGTAAATATATTTGTAAATAATAATGAGAAGAACCATAAGAATAAATATGAGAATAGGATAAAATCATTTTATGTTGAAGCATATAACTGGAATTTTTTAGAAAAATGGAAATCTATAAATACAAATGAAAAACTAGAATATAAAATAAATTATAATATAGGTTTAAATATAGATGCAGAGATTGGTGATTTCGGTGATTACAACTCAGATGTAAAAACAGATTTAATATTATTTAAATATGATAAAGATAAATTATTAAGTACCATTTTTATATATGTATTTAGTGTAAAGGAAAATAAATTTATATATCAT…	MYNFLSCKKKSIILQVLLIICTYNILLNFVNIFVNNNEKNHKNKYENRIKSFYVEAYNWNFLEKWKSINTNEKLEYKINYNIGLNIDAEIGDFGDYNSDVKTDLILFKYDKDKLLSTIFIYVFSVKENKFIYHTEVSFEGKIMNVTAIDLNFDGALDVLVLFKDNKDSSKSNKYYVAAFLQNDNDQLEEIWNSKKKEQNDESITDNEEDNIYYTNIHPLICDINNDGLPDIIGQQSGGPDGFFRFIWINTRNGFKSFLWKNINIFKYSELDEITNPNSSAIVDINGDCKSDLVFTVYNSYEKRIGLEIWLNKIIDGKSFYVKYSQDYLLPPNSLQVLFGDFNGDGSIDLVVPTCVKSSFCNYCCVSDDKIYFIPNIQKKICDSSWKKPDETKCRPASNL…	719	2	HMM: MYNFLSCKKKSIILQVLLIICTYNILLN, NN: MYNFLSCKKKSIILQVLLIICTYNILLN	yes	GO_0005576, GO_0016021, GO_0005886	GO_0020011	GO_0005576,GO_0016021,GO_0005886,GO_0020011	0	0	0	0	0	0	0	0	0	0	0	0	0	0	0	0	1	0	0	0	0	0	0	0	0	0	0	0	0	0	0	0	0	0	0	0	0
2265	PF3D7_0918400	conserved Plasmodium protein, unknown function	null	ATGTGTATATATTTTTTTCTTTTCCTTTTTATAATAACATCATGTAATAATAATAATATAAAATATTACAAGATAAATGATAAGAAAAATGAAAAAAGAAATAACACGTCTTATAATTATAATAATTATAATAATAATAATAATAATTCGTCGTTGAATACTAGTGTGTCTATATACATGGACAAGGATTATGAATATTTAGTACATACTTCTGAAAAAAATAATAGATTAATATGTGTAAAAAAAGAATATAATGATTTGATATATTATACTCATGATAACGATTGTGATCCTCAAAATACATTTAGCTTTTCTTTTAATTCTACATTTAAATTCGATGATCATTTTTATATGACATATAAAAAAAATAAGGAATCATTTATTGAAATGAATATAACA…	MCIYFFLFLFIITSCNNNNIKYYKINDKKNEKRNNTSYNYNNYNNNNNNSSLNTSVSIYMDKDYEYLVHTSEKNNRLICVKKEYNDLIYYTHDNDCDPQNTFSFSFNSTFKFDDHFYMTYKKNKESFIEMNITPSLAIGSCINCLFLDEMNLLSIYGYTFIYNKSNEYEYKNYYKKIIDLYHNNSEEYSNDSDVVWNIPVVINMIKADVDKKKKKKYNKNKGHLDSYNYNKDHKDMDKYNKRIYRNSLGLAATTFGDVRNGLSKDKWSDRNKIISKVESEPNNSYTNYDDIHLYYNNCQGNNNFQGHHKCGGNISYHQEDNSKENLPFYYYENSILKKFLKENRIHYAYDEIGKDKIANPNMSGNSDIYNNSPIKMVDRFFMNLKVMEENKEDERKEHK…	1720	3	HMM: MCIYFFLFLFIITSCN, NN: MCIYFFLFLFIITSCNNN	yes	GO_0005576, GO_0016021, GO_0016020	GO_0020011	GO_0005576,GO_0016021,GO_0016020,GO_0020011	0	0	0	0	0	0	0	0	0	0	0	0	0	0	0	0	1	0	0	0	0	0	0	0	0	0	0	0	0	0	0	0	0	0	0	0	0
1707	PF3D7_0727100	conserved Plasmodium protein, unknown function	null	ATGAAAAGAATAATCTTATTCTTTTTAATTATATGGGCAATAAATATTAAGAGATATATAAATTATAATATAAAAATAAAATTAAAGACGTTTACTAATAAAATATTTATGTCCGGAAGAGTACAATTAAAATCAACAAAATTACAACATAGGAAAAGGCCAAGGAAAAGAAAAAAATCTAGCATATATCCAACTCCTGTGTTATATCATCCTAGACAAAGAGATTATTTTAATCTTCAGGGTGAATATACATGTCTTCCGAGTGAAGATATCTTAAATTTATTATCACAAAACAAACTATATTTATTAATACAAAGTATAAGAAATAAAAATAATGATGCTATAAATAAAATATTATATAAAGATGTGAATAATATATATATAGATAAAAATCATATA…	MKRIILFFLIIWAINIKRYINYNIKIKLKTFTNKIFMSGRVQLKSTKLQHRKRPRKRKKSSIYPTPVLYHPRQRDYFNLQGEYTCLPSEDILNLLSQNKLYLLIQSIRNKNNDAINKILYKDVNNIYIDKNHIYYDDKNVQAKENGNIKTETQKGTQKGTQKGTHNSRDINHLYDREKKTCRNFIKFSNFNKYYNEKNNYTNEDIINIDNDDNNNNDNNNNNNNDNDNNNNNNDNNNNNNDNNNNNEEQEKGKDNTFVDINNIYFYFKKVNITNINKDNINDDIYKELLQLKKISLQNQDEIGYNIYKYFLNIITNVEREKYMDDFFLVKYINNIWINKNVHKYFYFLNSLYDRMRKISYKLFSLNYNIDIIGHDEEKNKMMYFQRHELFDKIIKKTKY…	1066	0	HMM: MKRIILFFLIIWAI, NN: MKRIILFFLIIWAINIKRYI	yes	GO_0005581, GO_0005737, GO_0005576	GO_0020011	GO_0005581,GO_0005737,GO_0005576,GO_0020011	0	0	0	0	0	0	0	0	0	0	0	0	0	0	0	0	1	0	1	0	0	0	0	0	0	0	0	0	0	0	0	0	1	0	0	0	0
2929	PF3D7_1106500	conserved Plasmodium protein, unknown function	null	ATGTTTTTAAGTATTCAATTTATAATTTTATTTTTTGCATTGATACATATAAAAAATATAATAGCATTAAAGTTAGAAATATTTAAAGGAAGATTTGGTTCTCCTAATAGTACAAGTTCTATGTTCAATAAAGATAATAAAATAAAATGTAGAAGAAAAGAAGTGCCTTTATTATTTGTTTCAAGTAATAAATGTTTAAAGGATTTATATTTGCTTAAGCATTCTGGAGTCAGTCCATTTGAAGAGAAGGGTAGTTTTATATATTTAAAAAGAGGAGAGAGAAATCGTAAAGATAAAAATTATCCATTCACACTATTTATTGAATATGGTACAAGTAAAAGTGCAAATATATTAGAAAAGGATAGTAATAAATATGAGGAGGGTAACCAAAAATATACT…	MFLSIQFIILFFALIHIKNIIALKLEIFKGRFGSPNSTSSMFNKDNKIKCRRKEVPLLFVSSNKCLKDLYLLKHSGVSPFEEKGSFIYLKRGERNRKDKNYPFTLFIEYGTSKSANILEKDSNKYEEGNQKYTNVIMEGCKDIIDCTKSEGLQNLMNQKVVENNKMDENIKMDENKKMDENIKMDENIKMDENIKMDKNIKMDKNIKMDENIKMDENIKMDKNIKMDKNIKMDKNIKMDKNIKMNKNIKMDKNIKMDKNIKMDKNIKMDDNIMMRENKKVEGKSRKGNNIRNKSLVLKRIGNRKVYNKKRKSITSRVVDIQNTNVRDYLFLPSQGRSLKLLNIIYNSWKEKNFDNFFDVLNSDDFDHTCIENWLHKFSISLSKKYLKIKICGDHILVRN…	2021	0	HMM: MFLSIQFIILFFALIHIKNIIAL, NN: MFLSIQFIILFFALIHIKNIIAL	yes	GO_0005581, GO_0005737, GO_0005576	GO_0020011	GO_0005581,GO_0005737,GO_0005576,GO_0020011	0	0	0	0	0	0	0	0	0	0	0	0	0	0	0	0	1	0	1	0	0	0	0	0	0	0	0	0	0	0	0	0	1	0	0	0	0
403	PF3D7_0305000	elongation factor Ts	EF-Ts	ATGAAATTGTTTTATTTTTTCTTGTTAAGCTTTCTGAGCAGTTATATAATTGCGTTTTCTTTTAAAAGTACGCAGAGTGCACATTTTATATTATCTGTGGGGAGATGTAATGAAAATTACGGTAATAATATTAAGAAAAATAGATTATATTCTACAAATAATGATCATTTAAAATTATTAAAATATGTAAGAGAAGTTACTAATGCTAGTATACAATTATGTAATAAAGCTTTGAAAGAATGTAACAATGATGTAGATAAAGCAATTGAACATGTTAGGAAAAATACCAAAAGTTCAACATTTGTTTCAACAAATATTAAAGTAAAAAAAGAAGGATTAGTAGCTAGCCAAATAAAAGATGACAAAATAGTTTTGTTAGAACTTTTAACTGACTCTGAT…	MKLFYFFLLSFLSSYIIAFSFKSTQSAHFILSVGRCNENYGNNIKKNRLYSTNNDHLKLLKYVREVTNASIQLCNKALKECNNDVDKAIEHVRKNTKSSTFVSTNIKVKKEGLVASQIKDDKIVLLELLTDSDFVARNKMFVQFVYSLLNVTLDNDLSVGNCKNAGDNKNSEDGYTTSGNILSNNNIMDEILSLPYVDEENKSNSTMREQLNYLRNIFREDIKIGRFSKYSKKNPNEFLHYYIHNKLDDHVGLSGVLLVLHINNLDEILKTKKEDIVNFANDLSMHIISAKPASVSIDTLNPKITKKEMDIIRDGLKDMKKPENILNNMIQGKMKKFYSSIVFLEQEYMLDETKRKVSQVIKDFGKDHNINISVNHFNYFAIGEKNVLME	390	0	HMM: MKLFYFFLLSFLSSYIIAF, NN: MKLFYFFLLSFLSSYIIAF	yes	GO_0005622	GO_0020011	GO_0005622,GO_0020011	0	0	0	0	0	0	0	0	0	0	0	0	0	0	0	0	0	0	0	1	0	0	0	0	0	0	0	0	0	0	0	0	0	0	0	0	0
696	PF3D7_0410700	ribosome biogenesis GTPase A, putative	RbgA	ATGCTCCTGAACATTTTCGTGCTATTGGTAAATATCAACCTTCTATTATGTGCACAAGTAAAAAATTTTCATAAACAAAAAAATATACATTGTTATGTTCTACCATATGCAAAAAAAAATATATATCCATGTAAAACCAAAGTATTGAAAAAAAATAATTATTTATCAATAAAAAATGGTAAAAGTAAAAAATATGGTTGTAATGAATTATTTCGTCAAAAAGGTGATGAGCTAGATGAATACAAAGATAATAAAATTGACGATGAAAAGAATGATAATAAGTCAAACGATAAAAGGAACGATGAAAAGAATGATAATAAGACAAACGATAAAAGGAACGATGAAAAGAATGATAATAAGACAAACGATAAAAGGAACGATGAAAAGAATGATAATAAG…	MLLNIFVLLVNINLLLCAQVKNFHKQKNIHCYVLPYAKKNIYPCKTKVLKKNNYLSIKNGKSKKYGCNELFRQKGDELDEYKDNKIDDEKNDNKSNDKRNDEKNDNKTNDKRNDEKNDNKTNDKRNDEKNDNKTNDKMKDEKNDNKTNDKMKDEKNDNKTNDKMKDEKNNNERNDKMKDEKNDNKTKDKINDDIYETFDEYFNKRAEENYTKLEGEKLKILKENIHTNKDEIRNVLKKTYKNEYNKLIKEDQEDEEVSQAVYENIKITFLMKENINNFLFTQYSYMINKLKEKSVIIKNLKKFYNQNVNPGGDSVHQNEDATKTNNVTDKDNRTHIDDSNQNNNINYHEDIHNKNYINNHEETLLKDQLNNIRKPFYHNKFVDKYYPNNNSKYKEENKS…	904	0	HMM: MLLNIFVLLVNINLLLCA, NN: MLLNIFVLLVNINLLLCA	yes	GO_0005622	GO_0020011	GO_0005622,GO_0020011	0	0	0	0	0	0	0	0	0	0	0	0	0	0	0	0	0	0	0	1	0	0	0	0	0	0	0	0	0	0	0	0	0	0	0	0	0
2532	PF3D7_1007200	rho GTPase-activating protein, putative	null	ATGCTGGACTCAGATGCTGAGGTTCCTCAGGAAGTCTTAGCTGAATATGAAAAATTATTAAAAAGGTCATATACTGAAAATTTTGACGATTTATATAAGACAGATTTATTAAAAGTAATAGGAAAAGATGGTTACGGATCACATATCGTTCTTCTCATTCCGTGTTTTATAGTAGCTGCTGGAGCGGATCCTGAAAAAACTCTGAGATATGCAATATTGACGTTAGATCCTATTGTCAAAGAAAATTATGTTTTAATATTATGTGAGACACATACAAATTGGCTAACAGATGCTGTATATGCTTATGCTAAACAATGGTATGATACATTACCCAGGAAATACAAAAAGAATTTAAAAAACTTATATCTGGTTCATAGTGGTTTTTTATCAAAAACTCTT…	MLDSDAEVPQEVLAEYEKLLKRSYTENFDDLYKTDLLKVIGKDGYGSHIVLLIPCFIVAAGADPEKTLRYAILTLDPIVKENYVLILCETHTNWLTDAVYAYAKQWYDTLPRKYKKNLKNLYLVHSGFLSKTLLTIVTPFISPKFWKKVEYIEKLEDLFLKLNIKASKYLKYFPYIVQRNEEVMLGGQPISPFGADLEILCQRFGKKYLHFKHIPSILIDFLTHLKKPEIINTKDLFNLQADAATLYGIVGDIEYGEPTTDFNNIPSLVCSFKLFLNTQKHGLLGKDAFSRLHYLKSTSASDKVIKLNLSKLYEKLSQGIKQCVLCLLHFFKTISEHASENNMTILALSKIFAPTFFRSKTPNAIFTECISLANKCMQMIIQNPDILMNPEKYNEQSSE…	593	0	null	no	GO_0005622	GO_0020011	GO_0005622,GO_0020011	0	0	0	0	0	0	0	0	0	0	0	0	0	0	0	0	0	0	0	1	0	0	0	0	0	0	0	0	0	0	0	0	0	0	0	0	0
4395	PF3D7_1352000	conserved Plasmodium protein, unknown function	null	ATGTTTATGAAATTCATATATGCTTGGTCGATATACATCTTGATATACACTAAATGTAACTCTTATATTCTGAGAAAAAAATATTTGGATAATTTATTTTTTGTTAATTATGACACAGTTCCCTTATACGATTATAATAGGAGGTGTGTTATATATGACAAAGCAAATAAAAGATGGAAATTGAGAAACCAGAGAATATATAAAAAAGAACAAAATGATGAAAGAGAAAAAGGAAAGGTTAATAGGTTTACAAGGTGTTATCTCCTAAACAATAATGAATTTAGACAATATGATAAAAAATTAAAGAAGAGAAGAAAAGAGAAAGAAGGAATTCTTTTTAGTAAGTTTGATAAGATGTTCAAAGAATCATTTAATGAAGATGATAAATTAAAGAAAAGC…	MFMKFIYAWSIYILIYTKCNSYILRKKYLDNLFFVNYDTVPLYDYNRRCVIYDKANKRWKLRNQRIYKKEQNDEREKGKVNRFTRCYLLNNNEFRQYDKKLKKRRKEKEGILFSKFDKMFKESFNEDDKLKKSELISILACICTNIVIEFLKLKEEKKTEDFTYTFDYSVMNVLKMVNFEYDVNEELKKQKKKKKMNKTYTSLYGEIKGGGNKKIDDYNDNIHMKKNEDPTINNSLFNEERIGANDKIEMFEETKEINIDINNKNTKEENELLDMYIQKLEFNTLEMNEIKTYIDLFFGKNTYEKVFVKNNININKIFDVLHTALFDKTQERENVMQLQQFVDNQEKKLNEKKINVRNINTFNDYLDKYVSLEEEKNINDLDNILYDDEKYESEQERTS…	2006	1	HMM: MFMKFIYAWSIYILIYTKCNSY, NN: MFMKFIYAWSIYILIYTKCNSY	yes	GO_0005622	GO_0020011	GO_0005622,GO_0020011	0	0	0	0	0	0	0	0	0	0	0	0	0	0	0	0	0	0	0	1	0	0	0	0	0	0	0	0	0	0	0	0	0	0	0	0	0
4470	PF3D7_1359800	ADP-ribosylation factor, putative	null	ATGGGTAATACTGTAAATAAAAAGACAGTTGTTACTAATGAAAATGTAAAGGTTAAAACGATAATACCCCAAAAAAAGTATAATATTTTAATTTTGGGCCTGAATGGGTCAGGTAAAACGACATTATTATATCATAATTTTATTCCAGAATGGACAAATATAACGTCTTATATGGAGCCCACAATTTCGTATCATTATGAGGAAATTAAATGGATAAATGGAAGACTTGGTTTTTGGGATTTATCTGGAAATCCTTTGATGAGAAATATTTGGCCATTAATATATAGAAATGTAAAAGTGAACGCAATTTTATATATTATTAACATTATGGATATATCAGATGAATGTATATCGGAAAATAACTCATTAATAAGCCTTTTGCTAAATGATGAATGTTTA…	MGNTVNKKTVVTNENVKVKTIIPQKKYNILILGLNGSGKTTLLYHNFIPEWTNITSYMEPTISYHYEEIKWINGRLGFWDLSGNPLMRNIWPLIYRNVKVNAILYIINIMDISDECISENNSLISLLLNDECLQTSCIVLVFNTFNEVHNIQENLKNDMLIKYKIEDLINHYGNRIHYLFVDCKNCKMDKGWIQLMQQISYYF	203	0	null	no	GO_0005622	GO_0020011	GO_0005622,GO_0020011	0	0	0	0	0	0	0	0	0	0	0	0	0	0	0	0	0	0	0	1	0	0	0	0	0	0	0	0	0	0	0	0	0	0	0	0	0
1040	PF3D7_0521400	conserved Plasmodium protein, unknown function	null	ATGTTAAGGCTCATCAAAGTACTATTTCTTCTTTTTTTATTTTGGAAAAAAGGTTATAGTATTAAAAAAGGGATTAAAAGAAACGCTTCATTTTATCATATACTTTATTATTTAAATAAAAATAAAAAAAATGACCCAAGCGTTTTTGAATGTAACAAAAGGGAGAGGAACATAAAGAATTATACATCACAGAATATTAATATCCATAATAATGTTAATTCTTTAAAACATAAAAATTGTTATACCTTAAACTATAATCCATTTTTTTTTGTACATAATGATTTTAAAAAAATATGGAAAAGAAAAAATGTAAAAAAATATACCAAACTTAAATCTCACAATGAAGAAAATATTTCGAATAATGAATATAGTTCAAGTATGCAAGTAAAAGATATAAAT…	MLRLIKVLFLLFLFWKKGYSIKKGIKRNASFYHILYYLNKNKKNDPSVFECNKRERNIKNYTSQNINIHNNVNSLKHKNCYTLNYNPFFFVHNDFKKIWKRKNVKKYTKLKSHNEENISNNEYSSSMQVKDINLENKMTSNEMNNETTHNLHNNNNNNNNVDDINKKNVDNFISDNISSTHDDKKVLTQLDDSFKKKIEKEIISEKIANEQNEVIKKVKLPIIGTQLKPSGGFTKEILQIIQESNNYINEVNKEIINEKIQNKISGNDLSFFDTDETLERHELNYLNKIYDNNHILNIYNFLLVWKQRKNIDLSVFVSKLSEHSNILPGERTVIKFSEVEKVQFLKKIRKNRNVSIAMIFVDNKNANNQESSTVNHNMFPIGILAHPLDISLLDKTGEI…	562	0	HMM: MLRLIKVLFLLFLFWKKGYSI, NN: MLRLIKVLFLLFLFWKKGYSI	yes	GO_0005622, GO_0005634	GO_0020011	GO_0005622,GO_0005634,GO_0020011	0	0	0	0	0	0	0	0	0	0	0	0	0	0	0	0	0	0	0	1	1	0	0	0	0	0	0	0	0	0	0	0	0	0	0	0	0
450	PF3D7_0310000	50S ribosomal protein L9, apicoplast, putative	null	ATGCATTATGCTTTTTTCTTTCTTATATATATTTTTTATATTATATTTTTGCCATCGTATTCTAGAGGATTTATTACTCCTCATATAAAAAGGCCTAGTTGTGTATTATATGCAGTAAAAAGAAAAAAAAAAAAAAATCCGAAACTGATTCATATTACTGTAAGTAGTGACAATGAGATAGGAAAGAAAGGAGAAGTAAAACAAGTAAAATTATCTCATGCCTTTAATTATATTATACCTCAACGACTTGGATATAGAAGTACGACTGACGAATTAGTAGAAAAAGAAAAAGAAGACAACACTTTGAAATATATAGACGACATAAGAACAAGTTTTATTTGGGCTTACAAAAAAAAGTTGAATGATTTAAATATTCTATTTCATTTTAAGAAAGATCAA…	MHYAFFFLIYIFYIIFLPSYSRGFITPHIKRPSCVLYAVKRKKKKNPKLIHITVSSDNEIGKKGEVKQVKLSHAFNYIIPQRLGYRSTTDELVEKEKEDNTLKYIDDIRTSFIWAYKKKLNDLNILFHFKKDQKFAVTQDDLINYLLTRGLIRENDDVYEKIESKKIKLTDFGTYPIKYTFINNISINMSIHIIKTG	197	1	HMM: MHYAFFFLIYIFYIIFLPSYSRGF, NN: MHYAFFFLIYIFYIIFLPSYSRGF	yes	GO_0005622, GO_0005840	GO_0020011	GO_0005622,GO_0005840,GO_0020011	0	0	0	0	0	0	0	0	0	0	0	0	0	0	0	0	0	0	0	1	0	0	0	0	0	0	0	0	0	0	0	0	0	0	0	0	0
2158	PF3D7_0907800	ribosomal protein L35, apicoplast, putative	null	ATGAAGTGTCTCTTGGTTAAGTTGTTCATGCTTATTTTTATACGAAGCTATACATATGCTATAAAATATAAAATCAATAAAGCAGCATGTATGAATAAGGTAGGGGGAATAGATATATATGCAAATATAAAATATAATATGAAAAAAAAAGAGAAAAAGAATATAAATAAGAAAATGAATATATATAATAATATGATAAGAAAAACGAATAGTTTACACAAGAATTTTATTCCTGAACAATTGGTTTTATTTCCACGTAACAAATTGTTAAATGAAATAAAATATTTCTATATAAGTTTTACTTATCATATCTTAAAAAGAGAAAAAAAAACAAAAATTCATAAAAGCGATTTTATTTTACATGTTCGTGGTTGTACAAACATTAAACCAAAAACGAAT…	MKCLLVKLFMLIFIRSYTYAIKYKINKAACMNKVGGIDIYANIKYNMKKKEKKNINKKMNIYNNMIRKTNSLHKNFIPEQLVLFPRNKLLNEIKYFYISFTYHILKREKKTKIHKSDFILHVRGCTNIKPKTNKSIAKRFKLTKNGKLIRKKPGRNHFLRKKTSSNKASLRKTTTIDSGRIQKKYKSVIFK	191	0	HMM: MKCLLVKLFMLIFIRSYTYAI, NN: MKCLLVKLFMLIFIRSYTYAI	yes	GO_0005622, GO_0005840	GO_0020011	GO_0005622,GO_0005840,GO_0020011	0	0	0	0	0	0	0	0	0	0	0	0	0	0	0	0	0	0	0	1	0	0	0	0	0	0	0	0	0	0	0	0	0	0	0	0	0
2925	PF3D7_1106100	apicoplast ribosomal protein S15 precursor, putative	null	ATGAAAAACATAAAATCATGTGTAACTTGTTTGTTATTTTTTTATATACAAATATGGATTAATTGTTTATTTTGTTTTGGATATAATATAAATAAGAATTTGGGGGTGTATCCTTTTAGCCTTATAAGAAAAAAAAACGTTCCACAAGAAAAATTCAAAAGACAACTTATAAAAGTTCAAAATGAAGGAAAAGAAAATATTTTTACACAAGATGGAAATACAAATACCATCAAGGAGGATAAAACAAAACAAACAAAAACGAATATTGATATAAAAAATAAAATAGAGAAAGAAAAAATAGAAATTAACGAAATTCTAAAGAAAAGTGAAAATATACTTTTAGAAAGGTCTTTCTCTTTTCACAAAGAGGACATAACTATTAAACCGGAACTACTAAAA…	MKNIKSCVTCLLFFYIQIWINCLFCFGYNINKNLGVYPFSLIRKKNVPQEKFKRQLIKVQNEGKENIFTQDGNTNTIKEDKTKQTKTNIDIKNKIEKEKIEINEILKKSENILLERSFSFHKEDITIKPELLKELITQKYRKIFQRHDKDCGSSEIQIIILTFKIFFLTEHMKKNKKDFACLRGLFKCVSKRRRLLVYLGRKDREMFEKITSYFNIKKPLLPRTPEYYNKDLKYIHFNNTKRFKNNAEKKKKDKLKKKKVQTDKILFGN	269	1	HMM: MKNIKSCVTCLLFFYIQIWINCLFCF, NN: MKNIKSCVTCLLFFYIQIWINCL	yes	GO_0005622, GO_0005840	GO_0020011	GO_0005622,GO_0005840,GO_0020011	0	0	0	0	0	0	0	0	0	0	0	0	0	0	0	0	0	0	0	1	0	0	0	0	0	0	0	0	0	0	0	0	0	0	0	0	0
5247	PF3D7_1467400	50S ribosomal protein L22, apicoplast, putative	RPL22	ATGATACGAAAAATTAAATTGATCATAATCATGTTAATTTTTCAAGTACTGTTGGATGAAATAATATTAGTATATAACCTCAGTTTTAGTGATAAGAAAAAATATGATTTGGCATTTATAAAAGGTGATAGTAATAAAATAATGATAAGAAATAATTCTTTAAGAAATAACACAATAATAAAAAAAACATGTGAAAAAGATAAGTTTGTATTAAATAACATATGTCAAACAAAAGAAGAGAACAAATTAGTTGATACAATATCATCGAATGACAATGTTACAATGGATAGTAATAATTTATTATATGATGATATGGATTTATTTGAAAATGATGGATTACAATTAAAGCAATGGTATTTTCCAGAAAAAGTAAAAGAGAAATGGAAAGAAAAACATATT…	MIRKIKLIIIMLIFQVLLDEIILVYNLSFSDKKKYDLAFIKGDSNKIMIRNNSLRNNTIIKKTCEKDKFVLNNICQTKEENKLVDTISSNDNVTMDSNNLLYDDMDLFENDGLQLKQWYFPEKVKEKWKEKHIENVRDNYKKVLLNNKYNELFNMYRNIKKNNIENYKKRVKTNRINPVIYVKKRLVSATAKYIKMSFMKTRKILWKIRYMPIIKAFAFLYYYGTNKYTVNIYKCIKSCLHNAINKYGRNNIKPVFHTLQANMGGYTKKINIRARGKTDIIREPHTHIRVVLEV	294	1	HMM: MIRKIKLIIIMLIFQVLLD, NN: MIRKIKLIIIMLIFQVLLD	yes	GO_0005622, GO_0005840	GO_0020011	GO_0005622,GO_0005840,GO_0020011	0	0	0	0	0	0	0	0	0	0	0	0	0	0	0	0	0	0	0	1	0	0	0	0	0	0	0	0	0	0	0	0	0	0	0	0	0
5023	PF3D7_1445000	conserved Plasmodium protein, unknown function	null	ATGGATATTGTATGGGATAAGGATACAGTCGATAAATTTTACAATTATTTATATGATGTAATAAATTATGAAAAATGTGTAGAACTGGAAAGAAATATAAGGATAGAGACAGGAACAGAAGATAAGCTGAATTTAAAGAATTGCTTATGTTATAATAATGAAAATTGTTCAGAAGAATGTAATAAAATAAATATTAGTAGTTATAAATTTAAAAAAGATGAAGATGATATATTAGGAGAAATAATAGATAATGAAAAGGAAAAAGAAAATATCGAATGTAATATTGGTTTAATTACACAAAGAGTATTTTCTATATATACAAATGTTATTAAGAAAGCAAAATTGGAAGGTACATATAATATTAATTTAGAAACCGATAATTTTATAAGAAGAGATATA…	MDIVWDKDTVDKFYNYLYDVINYEKCVELERNIRIETGTEDKLNLKNCLCYNNENCSEECNKINISSYKFKKDEDDILGEIIDNEKEKENIECNIGLITQRVFSIYTNVIKKAKLEGTYNINLETDNFIRRDIFRLVFHKYILQNTRNKIKQIQCKDTKNIISLANPLHIKDVELNKINSDTIANLMNNYIGIQKNFLGKQYMNLIYNELIFIEYNNQFNEFNTEYKNIRTDLFCWAYITSLDREKQKGLYKLLKELSYLPYELNKKANLSLQLSTLFQFLYFSPNHSFLKNHSDGGYDNLDNGKKITCIYIPSEYEHNQVLIKLYKNINTIQNNQSRNDTKIKNINDNISSNLENNKPIQVIKAEGDSLILLQTRNVSYEISMSKEKFFMVNLWIPGP…	406	0	null	no	GO_0005622, GO_0005840, GO_0015935	GO_0020011	GO_0005622,GO_0005840,GO_0015935,GO_0020011	0	0	0	0	0	0	0	0	0	0	0	0	0	0	0	0	0	0	0	1	0	0	0	0	0	0	0	0	0	0	0	0	0	0	0	0	0
874	PF3D7_0504400	ATP-dependent helicase, putative	null	ATGAAATCATTATTTTTTAATAAACTAAAAAATGTTGGTAAGAAAATAAAAATTAACTTTATCCAAATCTTGATAATATTTCTTGTATATGTAAATTTAGATTTTTTCAAGAGCAACATAAATGTTAAGGCAATACATACGAAGAAGAATTTATTTATACCTGTAAGTAACGAAATATTTTATTTTAAAAAAAATGTGTTAATAAAAAAAAGGAATAAGGAAAAAAGGTATACACATTCTAAAAACAAAGGATCGAATATATTCTTAAATTTGAATGAAGAAAATGATAATACAGTAAAAGAAAGGAAAAAAAAAATTAAGTATCCAGAAATAGGAGAATATAATGATGACGTAAACCATAATAAAAATAATGATAATAATGGTGATGATTCAGAAAGT…	MKSLFFNKLKNVGKKIKINFIQILIIFLVYVNLDFFKSNINVKAIHTKKNLFIPVSNEIFYFKKNVLIKKRNKEKRYTHSKNKGSNIFLNLNEENDNTVKERKKKIKYPEIGEYNDDVNHNKNNDNNGDDSESHLNDQGKCKFSDLSEINKNIVEFLENKKGIKYMTKIQSQSFKPIYEGKDIIGRSETGSGKTLAFALPLVEKLYKMKTSNEKFEEENGSHEEDQKKNIYDDVDNDNNYDNFSYGKKYQNREHNKDPSILVLEPTRELSKQVENTFKEISQFYNFNIMSIYGGESYTYQENKLRKGIDILTGTPGRIIDHIEKKNLSLQNIKYVVLDEADEMLNLGFTHDIERILSNINLKEAQVLLYSATTPSWIKDISSKYLKNPFCIDVVDSSNK…	755	0	null	no	GO_0005634	GO_0020011	GO_0005634,GO_0020011	0	0	0	0	0	0	0	0	0	0	0	0	0	0	0	0	0	0	0	0	1	0	0	0	0	0	0	0	0	0	0	0	0	0	0	0	0
1034	PF3D7_0520800	conserved Plasmodium protein, unknown function	null	ATGATAAATTATATAAACATTTATGTAATAATTATTATTTTATGTTATTTTGTTGAAAAAAATGCTACCATAAAAATTAGAAGAATTAACGACTATTTAAATTTTATACAGCCCAACATTTTTAGAAATATTACAAAATATGATTTAAGTACACCCTTTAATGTAATACGAGAAAAAAAGGGGAGGAATGAATTTCCTCTTGTAAATAATGTAGACATAGGTGTGTCCGATATTAATGAAAAGGCATTATATGATGAGGACACCAAAACAGATGACTTAAAAAATATAATAAATAAAAAAGATTTGAAGAATTATGATAACATAAATGATAATATAAATGATAAGATAAATAATAGCATAAATGATAACATAAATAATAACATAAATAATAACATAATT…	MINYINIYVIIIILCYFVEKNATIKIRRINDYLNFIQPNIFRNITKYDLSTPFNVIREKKGRNEFPLVNNVDIGVSDINEKALYDEDTKTDDLKNIINKKDLKNYDNINDNINDKINNSINDNINNNINNNIINNINNNINETDNINKVDHMNYIPNDHNLSTKHSYDNNTNDDEKYLNGEILNEEEINEHMKFQQWSDRFILSKDEEYYYDIQNECVNTKYYDKINQINDHIYKEENIMEDSSIQLMPFCNRKDKEKICQPLTKHINEKLSYDFYTNNTTDNVNKKENHLSPKECNNNNNIFDNPNEKENSLKKPFHQKKTTTLNEEEINNLSIVDMTKRTNMILPLRSLLMSIYIGKEAFNDFLQKGMNSIELSLQKYLHDYYEHNFERSIDDKVFL…	2054	0	HMM: MINYINIYVIIIILCYFVEKNAT, NN: MINYINIYVIIIILCYFVEKNATI	yes	GO_0005634	GO_0020011	GO_0005634,GO_0020011	0	0	0	0	0	0	0	0	0	0	0	0	0	0	0	0	0	0	0	0	1	0	0	0	0	0	0	0	0	0	0	0	0	0	0	0	0
1950	PF3D7_0819700	conserved Plasmodium protein, unknown function	null	ATGAAGAATTTTTGTTTAACTAAAGGAAAAGTAAAGAATGTAATTAACTACGCGATTTTATTATGTATATATATAATAATATGGATACTACTAACTTTATATTGTTTGTTTAATAAGTTAAAGAGTTATATTATAAGCTTACAACTAATATGTAAATATATTATTATACAAATTGTCAAATGTAATAATGTGAACGATTTAAATTTGAATAATTTAAAAAATAAAAGTAATAAAAATTTTCAATTTTTAAAGAATAAAATATATAATATATTTTATAATTGTCTTTCTAGAAAAAATGAAAAGCATGATGATATTTTTAAAATATATAAGAATATTAACAAGGTACCTAAACACATATATATAGTATTTAAAATAAGTGATTTAATAATATTGAACAGT…	MKNFCLTKGKVKNVINYAILLCIYIIIWILLTLYCLFNKLKSYIISLQLICKYIIIQIVKCNNVNDLNLNNLKNKSNKNFQFLKNKIYNIFYNCLSRKNEKHDDIFKIYKNINKVPKHIYIVFKISDLIILNSEKLINHIVNILIYLYEFKIEHVTIYVSDHFFDYIFYYDLFKYLYKKNFYMKCVIKENNISNNNNNFISSNDKCNKKNYFSCNYNNHIYDTNKSFQCYHHTDEFVITKFSLPQNIPPQENSSPELFYRKRKNKEKMNSNKNKKGNYKDDHMNSYKDDHMNSYKDDHMNSYKDDHMNSYKDDHMNSYKDDHMNSYKDDHMNSYKDDHMNSYKDDHMNSYKDDHMNSYKDDHMNSYKDDHMNSYKDDHMNSYKDDHMNSYKDDHMNSYK…	781	1	null	no	GO_0005634	GO_0020011	GO_0005634,GO_0020011	0	0	0	0	0	0	0	0	0	0	0	0	0	0	0	0	0	0	0	0	1	0	0	0	0	0	0	0	0	0	0	0	0	0	0	0	0
3616	PF3D7_1226800	ataxin-3, putative	ATX3	ATGAGCAAGAAATATGTATACTGGGAAAAACAAGGTAATGATCGTATGTGTGGATTGCATTGTATAAATAGTATCCTTCAAGGCCCATATTACAGTGAAGATGTATTGGCTAGTATTGGAAAAGAATTAGATGAGAAAGAAAATGAATTTTTACGAAGTTCATCTAACGATTTAGTAAGAAATAATTCTTTTAATGTATTGGATGATGGGTTTATAAATATATCTGTAATAATTGAAAGTTTAAGAAGAATGAATATATTATTAAAACATGTTTATGAAGAAGATTTAATTAAAATAATATCTAGTAATCATCAAGATATTGGTTATATTTGTAATTTACAAGAACATTGGTTTAGTATACGTAAAATTCATAATACTTGGTATGTATTAGACAGTTTA…	MSKKYVYWEKQGNDRMCGLHCINSILQGPYYSEDVLASIGKELDEKENEFLRSSSNDLVRNNSFNVLDDGFINISVIIESLRRMNILLKHVYEEDLIKIISSNHQDIGYICNLQEHWFSIRKIHNTWYVLDSLKSSPLYIKDMNLKFYFNDVIKKYHIFSVQNINPYVSLPKPDINFIPKNINQFYIPTNEISEISGVSDNFLLEDRYNLNKSENYSAFNQINNTPNFRWPENGGRRLNDDINTTNMNNVDDDDDLKIALKLSMEEYIKNMVPPLEETSDENCINVMVKLPNKKIHKRFSFTKTLSDLFYWIEYESAQGQDITSSLLFKNNYYLYQLYPRRKFCKYQNGSIELHTGGKTEMVHDKCLKDLNFEKEETFMIS	381	0	null	no	GO_0005634	GO_0020011	GO_0005634,GO_0020011	0	0	0	0	0	0	0	0	0	0	0	0	0	0	0	0	0	0	0	0	1	0	0	0	0	0	0	0	0	0	0	0	0	0	0	0	0
4022	PF3D7_1313800	conserved Plasmodium membrane protein, unknown function	null	ATGATGATAAATCAAGATATAAAAATAAAAGATAAAGAAATGGTTAGGACATATAACTTATTAGGAAAGAATTATCATTTTATGTTAAAGGAATATGACAATTTATGTAGTATAAATATAATAAAGAATAATATAATAAATTTTAGAATAGTAAAAAATTTATTAGCAATAAATAATTTAATAGATCAAGTTGATAAATCTTTATTGTTAAATATATTTGAAGAAAATGTAGATAATGATTTATTATTGGTATTGTCAAAAAACAATTCTAATTTCATATTAAAATTGTTAGCTATATTTTATATAAAACTTAGTAAGAATACAAAATTTAATATTACTAATCATTTTAATAGAATATTTGATATAAATAAAAATACAAGTAATACATCGGGTGAATTG…	MMINQDIKIKDKEMVRTYNLLGKNYHFMLKEYDNLCSINIIKNNIINFRIVKNLLAINNLIDQVDKSLLLNIFEENVDNDLLLVLSKNNSNFILKLLAIFYIKLSKNTKFNITNHFNRIFDINKNTSNTSGELKNIPENLFKNAIILISLILYHLPVRLSYHIPTIIDYSKKIRKSDNLELKYFYQKCINSIIKYGKLNISECDKIFKYLKKSLNDKDFFIQYIALKCLSNLFILHPEYSLLEYEYFINHIIDNININNYVSVVYLKYVIRFVSIIFCNCANVNYYNSKDNDGTNKKHIDDIFLFNLNIMKKKKKKYSDEDIRDEDYIDEKKKSYNDNNNNNNLKSDIIEDNFNNNINNNINYNNHNNNHDEIKKKHHFFSDLLKTATEELVSKISKIK…	3411	8	null	no	GO_0005634	GO_0020011	GO_0005634,GO_0020011	0	0	0	0	0	0	0	0	0	0	0	0	0	0	0	0	0	0	0	0	1	0	0	0	0	0	0	0	0	0	0	0	0	0	0	0	0
5316	PF3D7_1474400	conserved Plasmodium protein, unknown function	null	ATGGAGAAAAATAAAAAGAAGAAATCTTTGAAGGGAAAAGTCAGGAATAAAGAAGATGTTAAAAATGATAAAAATATATTAAAAAAGGATAAGAATAATAAAGACAGCTCACATGGTACTATTATTAATACTAGTGATAAAGATAAGGATGAATCAAAAACTAAAGTTTTAAGAGAAGATAATATTTTTAAAAACACTGATAATTCTGCCACTTTTTATGATAAAACAAGTGATGTTATAAATGTATTATATGATTATAAAAATAGTAATTTGAAAAGTTCCCAAAATAAAGACAAAGATATAATTAGTAGTAATCATGAAGATATAATAAATAATACTTTAAGTATATCAAATAAACTAAAGAATGACGACATATTTGAAAAAAGTATGCTGCTTGTA…	MEKNKKKKSLKGKVRNKEDVKNDKNILKKDKNNKDSSHGTIINTSDKDKDESKTKVLREDNIFKNTDNSATFYDKTSDVINVLYDYKNSNLKSSQNKDKDIISSNHEDIINNTLSISNKLKNDDIFEKSMLLVNNKLECEDTITLLEKDINVNMNDYDNSSEIIKYMENFKEKKKCMDNVTFSMGYKKEDNKEEGKEKEPHELKMKIEEKETISYKSKKKKKMEKYHISNEEKEKVMKKYMLNLEEKYRKKKEEDLKKIVDKNKEDMKKFKEKENTFVNFLKNPRLNLSKDENLNDYLSIYPKTIQFVDIRKNEIFIKELLITNKSNILLHIIIIPPTSKQFYIKEIINIYNKQEENEKSNLNHQIAPGHSLKIKVCYNVVSLNYQEDHIRLLSEAGNE…	2977	0	null	no	GO_0005634	GO_0020011	GO_0005634,GO_0020011	0	0	0	0	0	0	0	0	0	0	0	0	0	0	0	0	0	0	0	0	1	0	0	0	0	0	0	0	0	0	0	0	0	0	0	0	0
3581	PF3D7_1223300	DNA gyrase subunit A	GyrA	ATGTCGTTTAAATTTTCCATTGTTTTTGTTCTGTATTTATTATTTTTATTGAAATTTAATAAGAGGTTTATTTTTTTAAAAAGTGAAAAAATTACAAGTTATATAAATACACAAATCCCGAATTATAGTAGCAGCCCTCCTTTTTTTTTAAAAAAAGAGGCTAAAAATAATATTAAAAAATGTTATTTTATAAAGAGAGAGGGGTATAGGAATATAGGCACAAAAAATGCGTCAAATGCGTTTGTTTTAAATTTCAAGAGTAATCGTTCAACATATACAGACAATGCTTTTAGTTGTACATCTTTGTGTTCTGAAAAGAAGGAAAGAAAAAAGGTCCAAGATCCTTATGATCTGAAGGCGAAGAAGAAAGAAAAGACATATGAATTAAATGATATAAAA…	MSFKFSIVFVLYLLFLLKFNKRFIFLKSEKITSYINTQIPNYSSSPPFFLKKEAKNNIKKCYFIKREGYRNIGTKNASNAFVLNFKSNRSTYTDNAFSCTSLCSEKKERKKVQDPYDLKAKKKEKTYELNDIKNNEKKKDDIVNASNDITNDKLDNINNNINESRKLIKGEYYDVEICEILSKSFLSYANFLILNRCLCDYRDGLKTVQRRIIWSMYEINKGIDKKGYKKCARIVGEVIGKYHPHGDKSVYDALVRLAQKHHNNNLLIKGYGNFGSVEYNAAAMRYTEAKISSFCYDILLDEINDENVEYIKNFDGNEREPKVLCSKIPLLLINGCSGIAVSILSSIPCHNLIDVANCCINFLINENIRDDELFHIIKGPDFSTGGIIISKYDILKNIY…	1222	0	HMM: MSFKFSIVFVLYLLFLLKFNKRFIFLK, NN: MSFKFSIVFVLYLLFLLKFNKRFIFLK	yes	GO_0005694	GO_0020011	GO_0005694,GO_0020011	0	0	0	0	0	0	0	0	0	0	0	0	0	0	0	0	0	0	0	0	0	0	0	0	0	0	0	0	0	0	1	0	0	0	0	0	0
281	PF3D7_0214800	conserved Plasmodium membrane protein, unknown function	null	ATGTTGGAATTATTACGTAATGCTTATAATAAATGTAAAGAGTATATTTTGGGCTTATCGAAAAAATCACAAATATATAAAATAAATATATTAAATTATTGTTTATTATTTTCGTTTTTTTTATTTTATGCATCATATTTTTTTTTTATAAATGGAATAATAAATCCAGCAGTAAAAATTGTTTTCCATGGAAGTATTATTGAGGACAAAACCAAAGTTTACGAGAACTCGATAATTGAATCAATATGGCTATTGTTTACCAAGGGAAGTTATTTTAATATGGCCATGCTTCTATTCTTTTCTATTATAATACCGTTTCTCAAGTTACTTATGGTTAGTGATAACTTTTATAGTTTTATCGTATTATATAAAATGAATAAAAAACGAGAAGAGGAAAAG…	MLELLRNAYNKCKEYILGLSKKSQIYKINILNYCLLFSFFLFYASYFFFINGIINPAVKIVFHGSIIEDKTKVYENSIIESIWLLFTKGSYFNMAMLLFFSIIIPFLKLLMVSDNFYSFIVLYKMNKKREEEKRRRRRRIRAREYNNAKYNKNRYKMNKYNRNKNINDIYKDDIYYSENIFKNDEINYINTINENEEFILKKFKILNFISRFQFVDVFISLFIVSSLNLYLLEARMLNGAYYFLNYCMLSTISSFLLFSFTSLKIHIFKNGNIKISACLNESNLEVTTSGPLSTKDLVEEEGHAQINNLIINDKNMTSGVVNDFSGNGNNVELTDDLKSGEPQNRDDIQTEETKKEKMNTRTHNDEDNTKKKNIKDKKKANGDDKVIQKCIDNERKKKQ…	1371	11	null	no	GO_0005737	GO_0020011	GO_0005737,GO_0020011	0	0	0	0	0	0	0	0	0	0	0	0	0	0	0	0	0	0	0	0	0	0	0	0	0	0	0	0	0	0	0	0	1	0	0	0	0
701	PF3D7_0411200	conserved Plasmodium protein, unknown function	null	ATGTATTTATTATGTATATTTTTATATATTTTATCATTTCTATGTTTTACCATATGTATAAAAAGAAAACAAAATGTGTCGAAGAGATGGCAATTTTTCATACCACATATAAATAAGGAAGGATTATATAACATTATGGATAAGAAAATTATAAGGGTGAATAAAAATAAAAGGTTCCATAGAAATGTTGTGTGTAGTAATCGTTTATCAGAATTTATAGATAGAGATATTAATATAAATAATAAGATGAAGAATATAAAGGAATTAAAAAAAAAACATATTGATAATAATATTTTGATAAAAGCAGATATATTTAGTAATATCATTGAGAAAAAAAATAATAGCAATTTATTTTTTAAAAAATTTTGTTCTTTTATAAATATGGAATATGATGAAACA…	MYLLCIFLYILSFLCFTICIKRKQNVSKRWQFFIPHINKEGLYNIMDKKIIRVNKNKRFHRNVVCSNRLSEFIDRDININNKMKNIKELKKKHIDNNILIKADIFSNIIEKKNNSNLFFKKFCSFINMEYDETTKDLEELKINKRLKNNNNDNNNNNNNNMYDNKSNNIHNNNNNNSDNLIKCIKKNQDVLQLVEGYWLLTLKNKYMFSFLKKKKKIIFSVSSGVDSLCLLYSFIFVIYKILISMIYKNKSYFGFMNKINSVYSFTHEDIIDIIKEYRYENNVSFFLSILSKIIVIYCHHNTRKECTSEMYFLKNICKKFGIHFKSKKLTEKSIQKLNVINLKTKKKNYESNVNKKININMMKNKKNFLLLARTWRRNIYVHLSNDILKRDMNNNIYHN…	1245	2	HMM: MYLLCIFLYILSFLCFTICI, NN: MYLLCIFLYILSFLCFTICI	yes	GO_0005737	GO_0020011	GO_0005737,GO_0020011	0	0	0	0	0	0	0	0	0	0	0	0	0	0	0	0	0	0	0	0	0	0	0	0	0	0	0	0	0	0	0	0	1	0	0	0	0
723	PF3D7_0414100	conserved Plasmodium membrane protein, unknown function	null	ATGAAATATATTTCCATTTTAATTGTTTTTTTTGAATTATATTTTATATTGAACTTCAATGTAACATCATGTTTTCAATTAAAAAGGAATACACCCTTTTATGTTTATAATAGAAATATTATATCATGTATAAAAAAAAATGAGAGAAACAAAAAGGTACTAAACTTAGAAAAATCCGTTAAAGATGGAAAATGTGTAAAAAATTTAAATATTAATAAAAATGAAATATATAAAGATATAGAGAGTTATTTAAAGAACGATGCTTCCATTTCTTCCAATAAAAATAATGACATAAATAATTTAAATGATATTACATTTACGAATTTTGTTTCAATTTCAAATGACTGGAATAATATTGTTATTGAAGATGGGAATAATAAAGATATTAGGAAATTAACA…	MKYISILIVFFELYFILNFNVTSCFQLKRNTPFYVYNRNIISCIKKNERNKKVLNLEKSVKDGKCVKNLNINKNEIYKDIESYLKNDASISSNKNNDINNLNDITFTNFVSISNDWNNIVIEDGNNKDIRKLTDFLFKEYKRAYAYIDEKARNINNIVNSEKIKSLLDKFGSILIDDMNIDEFYKHIEMCFLLLNNCKDNYISFSLIKNEIINIVNQIIKHSQKFLRDEQICKKMKNDFMNIHNLIKEIKKNDIIKMNIKNFMSVINSNIVLNNNNIFYFLTEIFSSLNFLMKDNPQLIYEYDYIINPHFFFLCIFSLYSYNLSKTRFYYFLLLIHNQFDLKENVAKYDDNMNYNRYKNSIINIIFEREKKEYESIKEIIVQSDHSRNTQNTNETLDDK…	1485	4	HMM: MKYISILIVFFELYFILNFNVTSCF, NN: MKYISILIVFFELYFILNFNVTSCF	yes	GO_0005737	GO_0020011	GO_0005737,GO_0020011	0	0	0	0	0	0	0	0	0	0	0	0	0	0	0	0	0	0	0	0	0	0	0	0	0	0	0	0	0	0	0	0	1	0	0	0	0
740	PF3D7_0415700	conserved Plasmodium protein, unknown function	null	ATGCGTTTACTGAAATATGGAAGAGAACTAATTGTTTTGTTATATGTTATTCAAATATTTGTCATCAAAAGTAAAAAGATTTTTTCGTCAGATAAACAATGTCCACACAAAATATATCCTCCTATAAATAAGGAGTTATTTAATATAAAGAATAATGGATATAGATTTTTGAGAAAAGTTAATTTTCTTTTTTTTAAAGGGAAAAAAAATGATTATGAAATGAAGAATTTAGAAAATGTCCCTTTGTTTGCTGTTACTAATGAATTTGATGAAATAATATTGTCCTTTCATTTTAATAATAACAATAATAACAATAATAATAATAATACTTTATATAATAATGAAAAAGAATTTTTCGATAAACATATTAAATTATCTAATGAAGAAAATAAGTTATTA…	MRLLKYGRELIVLLYVIQIFVIKSKKIFSSDKQCPHKIYPPINKELFNIKNNGYRFLRKVNFLFFKGKKNDYEMKNLENVPLFAVTNEFDEIILSFHFNNNNNNNNNNNTLYNNEKEFFDKHIKLSNEENKLLFPMVLYNDEYRSQINVNEIYDPTNSVAIFFFDLKTAEAYRDDILYLYNKNLKEEKKTNTPFFGSKIMLTNLSYFMKIKNKYKSKINFILIPNYEQLQNVLKNKKVFYGTPIYYINKIKLRKSILKKKFFHFFYNDLEKKKKVQLYPNVYLTYTIEVTKDEKKNKLNEKEGNHMKNNRNNDNNDNNDNNDNNDNNDNEETLIIQIETKDQKKYIPIFFSYEQASQFYNIFLKHFQNNFTEYCLPKPNIILNSFENLITALKYSNYKK…	461	0	HMM: MRLLKYGRELIVLLYVIQIFVIKSK, NN: MRLLKYGRELIVLLYVIQIFVIKSK	yes	GO_0005737	GO_0020011	GO_0005737,GO_0020011	0	0	0	0	0	0	0	0	0	0	0	0	0	0	0	0	0	0	0	0	0	0	0	0	0	0	0	0	0	0	0	0	1	0	0	0	0
925	PF3D7_0509600	asparagine--tRNA ligase	AsnRS	ATGAGAATATATTTTATCACATTAATCTATTTCTTTACATTATTATTTTTATTAACAAAATGTATTAAAAACAAGAACAGAAATAAGATATCAAATATAAGCTGTACCTATAATTTGTCAAGGATAAGAAATAGGCCTGTACTTACAACAGGTACTAAAAGGAGAAAGCTGAGGAATAATTTTTTTTTTTTAAACAACTACAGAAAAATGATATCATTATGTAATAAAATAGATATAAAGAAAAGGTTCTTACTTCCTAAGCTTCAGGGGAAATATAATCTGTACTGTACAACAAAAAATGTTGAAAGGACGAGAATTAAAGACCTATTTAAAATGGACATAAAAGAAGCACAACATAAAAATTTTAAAATTTGTGGTTGGATAAAATCAGTGAGAACA…	MRIYFITLIYFFTLLFLLTKCIKNKNRNKISNISCTYNLSRIRNRPVLTTGTKRRKLRNNFFFLNNYRKMISLCNKIDIKKRFLLPKLQGKYNLYCTTKNVERTRIKDLFKMDIKEAQHKNFKICGWIKSVRTVGKSYFVFVDINDGSYYKNLQVIIDDKIPDYEYILKTSTDDAIECFGELKGSIGKKQNVELCVYDISKNHYIKLFKQMNQDTVEEKEKINDSGNEKDNHNFNSNGHVNNYNDSNNNNNNNNNNYNNNNHVNNYHDSNNINDNIIFTKNSSGHINEDNKTKGAKHNKEDYYVISKKYHTKQYLRNYPHLRARTKLYSSLFRLKSDIIFETFNFLKKKKNYTYINTPILTSNDCEGAGKLFYATTLFDQQIKNEQREEDHMKKGITNE…	722	1	HMM: MRIYFITLIYFFTLLFLLTKCI, NN: MRIYFITLIYFFTLLFLLTKCI	yes	GO_0005737	GO_0020011	GO_0005737,GO_0020011	0	0	0	0	0	0	0	0	0	0	0	0	0	0	0	0	0	0	0	0	0	0	0	0	0	0	0	0	0	0	0	0	1	0	0	0	0
1001	PF3D7_0517500	UTP--glucose-1-phosphate uridylyltransferase, putative	null	ATGCAAAAACTAAATACGATTATGAACACATTGGGGGAAAATAAAAAGTATGTAGACTATTTAATAAGAACCGAACAATTTGAATTATTAGCACATGAAGGGTTAAACGAGAAAAATATTTATGATATAATAAATCAAATAAAAGAATTTGAGTTAATGTATCCTGATGGTTTTATTAAATATATTGAAAAAGGAAGAGAATTTTTAAAAAGGTCTCAAATGAATATTAATGAATATTATAATTATAAAATCGAAAAACCAGATAATTTAATAAAAATCAAGTTTCATCTTACTAATGATATAACATTCAAAAAAGAGGATATAAAAAATAATTTCCTTAATATGGATAATAAATTATTATATAATAATTGTTATGTAAACAATAATATATTATATCGT…	MQKLNTIMNTLGENKKYVDYLIRTEQFELLAHEGLNEKNIYDIINQIKEFELMYPDGFIKYIEKGREFLKRSQMNINEYYNYKIEKPDNLIKIKFHLTNDITFKKEDIKNNFLNMDNKLLYNNCYVNNNILYRNKTFNHILKRNKKKNTSYHHREILNNSHGVSSNESTPVSILSNNKKSNMYINKEYPTYVNGIRQINTHQNVKNGTYNEDKKIKYSEKGNVSDYKCGLGILNNNHQRSYEESTIFTLEQFLYYEKIGLDHIDKISFILLAGGLGERLKHKDIKIKLFTNLISEETYIEYYCNYIRCFEKYIKKEKKKKMNIPFIIMLSDDTYEKTLCFFEEKNYFGLEKNQVHFLKQNKVFCFKNNQAHLDFTYEKNTFIISKKPHGHGDIHYLINK…	837	0	null	no	GO_0005737	GO_0020011	GO_0005737,GO_0020011	0	0	0	0	0	0	0	0	0	0	0	0	0	0	0	0	0	0	0	0	0	0	0	0	0	0	0	0	0	0	0	0	1	0	0	0	0
1185	PF3D7_0604400	conserved Plasmodium protein, unknown function	null	ATGAATATATGTTATTTATTTATTTATATGCTTTGCCTGTTTATGTTACACGGCGAGCTTTTATTTTTTTGTAAAAAACATGAAAATATAAATAAACAAAAGGATTTGAAAAAAAAGGAAATAATAAATAAAATAAAGAACAAAACAAATGATCTTAGATATATGTTTGACAATTTATATGTGCAACATAAGAATACGCCACTTTACATATTTCTTAAAGATCATAATGAAGAAAAAAGACATCTTTTAAAAGTTATATTTTTATATGGAAAGTTGCATTCCCTTCAAGGCTTAAATACGCCTTTCTCGAAATTCTATATGTTATATAAGAATAAAAAACAAATACCCTCAACAATAAGATTACAAAATAAAATACGGGAAGAGAAAAAATTCATAGAT…	MNICYLFIYMLCLFMLHGELLFFCKKHENINKQKDLKKKEIINKIKNKTNDLRYMFDNLYVQHKNTPLYIFLKDHNEEKRHLLKVIFLYGKLHSLQGLNTPFSKFYMLYKNKKQIPSTIRLQNKIREEKKFIDNMDKSSKKKYIKNKIDEYVNLNTNVKKLYSNIEGKINSLENFKDI	178	1	HMM: MNICYLFIYMLCLFMLHGE, NN: MNICYLFIYMLCLFMLHGE	yes	GO_0005737	GO_0020011	GO_0005737,GO_0020011	0	0	0	0	0	0	0	0	0	0	0	0	0	0	0	0	0	0	0	0	0	0	0	0	0	0	0	0	0	0	0	0	1	0	0	0	0
1222	PF3D7_0608100	conserved Plasmodium protein, unknown function	null	ATGAAATACCAGTTATTTATTGCCCTCATTGTTTTGTTGAATGTTTGCTTTAGCTACCTTATAAAGAAGAAGAATATTATTATAAATAATAATGATAATTTTTATATTTGTAATTTTGTAAAAGATAAAAAAGGAAGAAGAAAATATAATAATAACTATAATAAGAAAACTCTCAATGGAATAAAAAGTATTGTTAATTCAGGATGTGTAAATCAAGATGTTATGAGAAATGTTGATGAGGCTTATGAGGGAAAGAAAAATTTAATAGAAGGGAATGATTTGCAAAAAAAATTCTTACAAGCATCAAAAGAAGATGATTATAATTATTTATATTTTTATCATATATATAAAAAAATGAAATTAATAAAAAGAGAAAAATATATATATAACCCAACAAAA…	MKYQLFIALIVLLNVCFSYLIKKKNIIINNNDNFYICNFVKDKKGRRKYNNNYNKKTLNGIKSIVNSGCVNQDVMRNVDEAYEGKKNLIEGNDLQKKFLQASKEDDYNYLYFYHIYKKMKLIKREKYIYNPTKYESVRSYIKRELKDCLDVNTSAYIFKLSEFYSKNVLEVSVYVNEIINILSFFTFNSEHNLKYNEKEENQNTTNDILDYNKKYVSDDMDDNAIHSTQNNSLNNQNKADTLVYDTTTIKDSNNNNDDDDDDDENYNYVSDNIEDEHIHTDDNKDHSDIYPDNKILLEDDKKKISNEKNFYDQEKINSIIEKTKEQNNCNEQNLNDDDNIFKKYNENQSKMKFSKLINKDEKYKSFCFYFIRLVDSISGLFCTIAKRKKREEILNFLKN…	1322	0	HMM: MKYQLFIALIVLLNVCFSY, NN: MKYQLFIALIVLLNVCFSY	yes	GO_0005737	GO_0020011	GO_0005737,GO_0020011	0	0	0	0	0	0	0	0	0	0	0	0	0	0	0	0	0	0	0	0	0	0	0	0	0	0	0	0	0	0	0	0	1	0	0	0	0
1507	PF3D7_0704900	peptide chain release factor 2	RF2	ATGAATTTGAAGTATAACCTTTTCCTGACATTAAGCATTTTTTTTTTAGAGCTATTGATAATGTCTATTTTTGTTGAATGTAGGAAAAATATAAGAGGACTTAATAAATGTTTATTTCTATATAAGGGTGTAAGGAACATAAGGAATCGATATAATTTATGTTCTTATGTAAATAAAGATGTGGAGAATTATTCAAGATATTTTAAAAATTCATGTTCGTTAATATTATCGTCTGGTACAGGTGGAACAGAAGCTTGTGATTTTTGTAATATGTTATACAATATGTATATAAAATATTTATGTAGAATAAAAAATCGGAAGAACATAAAGTATGAAGTTATTGATATAAGTAAAAATGAAGTTGGTATTAAAAAAGTGGAAATAAAAATTGATGGAGAA…	MNLKYNLFLTLSIFFLELLIMSIFVECRKNIRGLNKCLFLYKGVRNIRNRYNLCSYVNKDVENYSRYFKNSCSLILSSGTGGTEACDFCNMLYNMYIKYLCRIKNRKNIKYEVIDISKNEVGIKKVEIKIDGEYSFYNFVSEKGIHRLVRNSPFNAQNKKMTSFVKVDVIPTLNFNDLNVINFLNTAEGVGSSSSSKLTKESSDKKQNKNKHKQLKESDNNNNNMNNSYNGGNNKMNDFVINKSDLVIQTMRSGGKGGQNVNKVETAVRILHKPTNISVKASSERTQLLNKRNALKRIYEKLLYLQTEALKNKKYELANKSLTHFGEQIRNYVLYGNKMIKDTRTNVFSTDIDKVLYQGEIDIFIDAYQKNL	372	1	HMM: MNLKYNLFLTLSIFFLELLIMSI, NN: MNLKYNLFLTLSIFFLELLIMSIFVECR	yes	GO_0005737	GO_0020011	GO_0005737,GO_0020011	0	0	0	0	0	0	0	0	0	0	0	0	0	0	0	0	0	0	0	0	0	0	0	0	0	0	0	0	0	0	0	0	1	0	0	0	0
1703	PF3D7_0726700	conserved Plasmodium protein, unknown function	null	ATGAAGATTTTCCTTTTATGTTTTGCTTTGTTATTTGTACCATATAAATGTTTAATTATAACTTTGAAAAATGATAACACATTTTTTGTCTTTCCAAATATAATGAAAAACAATAGGAACTTATCGAAACGTAATTTTACTACCTATATGAAGCGCTTAAGGAATGCTAGTGTGGAAATTGATTTGGTTAATCGAAAAGATTTAACAAAAGTGGAAGTTATTAAAATGTTTTTAAAAGGTGTTAAAGAATGTAAAAATGTAGAATACTTGAAAGAAAAACATAAAGGACATGTTCCACCAACCACCAAAAGGAAATTAATGAAACAAAAAAGAATGATTAATTTAAGAGCACAAATTAAAAATACAAGATTGAAAAAACAAGAACAAGTACCTGAAGAT…	MKIFLLCFALLFVPYKCLIITLKNDNTFFVFPNIMKNNRNLSKRNFTTYMKRLRNASVEIDLVNRKDLTKVEVIKMFLKGVKECKNVEYLKEKHKGHVPPTTKRKLMKQKRMINLRAQIKNTRLKKQEQVPEDKNILNFPEDQLKNINAAVLYFRKYFEKYENNNDSNDI	170	0	HMM: MKIFLLCFALLFVPYKCLI, NN: MKIFLLCFALLFVPYKCLII	yes	GO_0005737	GO_0020011	GO_0005737,GO_0020011	0	0	0	0	0	0	0	0	0	0	0	0	0	0	0	0	0	0	0	0	0	0	0	0	0	0	0	0	0	0	0	0	1	0	0	0	0
1824	PF3D7_0806900	conserved Plasmodium protein, unknown function	null	ATGAGGCAGGGGCTATGTAAAAGGCTAGTATTATTGGTGTCCTTAAATATATTAATATTTATAATGGTTAACTACAATTTTTGTAGTTTTGGTTTTATAATAAATAGAAATGAAGTAATGAAAGGTAGCAGTATAATAATAGATAATATGAAGAAGAAGCAGAGCAGGGAAAAAAGAAAGAATATTGGATTTGTGAATTGTTTTATTTTAAGAAATAACAAAATAAGATGGGGGAAAAAGGAAGAAAATAATAAGAAAATAAATATTAAAAGAATATTTTTGTTTGACAGAAGTGTCGATAAAGTGAGTGGTCATTTTTTACAAGACAGAGGATTATTTATAGAAGCTGACAAGAAGATGAAAATTATAGAAGAGATAGAAAAGATGACAAAATTAGAA…	MRQGLCKRLVLLVSLNILIFIMVNYNFCSFGFIINRNEVMKGSSIIIDNMKKKQSREKRKNIGFVNCFILRNNKIRWGKKEENNKKINIKRIFLFDRSVDKVSGHFLQDRGLFIEADKKMKIIEEIEKMTKLEYKNVEKYLNVLSENDVYEEVINHKFYMYKKNNEKEKHDRLIKIQEFLNPFIINLRKKKAKEKVEYLIACIIKGVNIDEVITEMFKRKMIDIYVLTFIDDKIMEAHTKLLKDDKLNNKDEQMSISEKILRTLKDRIIAQQKLNKKGTFVFTRLLFLSSTLDINEDRKSMIKSMINTIEQLEEFELYLLDALEYAHENDKLQKYIPHMELLLNACKQVNPVYNQTLNKQSENIGFFPESVDPSNLKNF	379	1	HMM: MRQGLCKRLVLLVSLNILIFIMVNYNFCS, NN: MRQGLCKRLVLLVSLNILIFIMVNYN	yes	GO_0005737	GO_0020011	GO_0005737,GO_0020011	0	0	0	0	0	0	0	0	0	0	0	0	0	0	0	0	0	0	0	0	0	0	0	0	0	0	0	0	0	0	0	0	1	0	0	0	0
1835	PF3D7_0808000	conserved Plasmodium protein, unknown function	null	ATGAAAATTAGTAATTATATATTTGGTAGAATTATCGATTGTTATAGTTATGTTGATAAAATAAAAACACATGTAGAATTTAATAGAATAAAAAAATACTTTCAAGATGCTCATATTCTTGATAAATATTTGAATAATTATAAAAGTAAAATAGAATATTATCGTGGGAAAATAAAGGAAAATGTACATTCAATATTGAGAAATAACTATATATGTTTTGAGAAAAATGTAGATGAGGATTTAATTTTTGTTAATAGGTATGTTTATTATGAGATAAAAAATGAAGACTGTATTATGATATGTCGAAAAAGGTTGAAAAGGAATTTTTTTAAAAAAAAAAGAGAATATATAGGAAAAAAAAAGGACTATATAGAAAATAAAAATATATATGATTATTAT…	MKISNYIFGRIIDCYSYVDKIKTHVEFNRIKKYFQDAHILDKYLNNYKSKIEYYRGKIKENVHSILRNNYICFEKNVDEDLIFVNRYVYYEIKNEDCIMICRKRLKRNFFKKKREYIGKKKDYIENKNIYDYYDYYDYYDYNSLEELKKRKYISRYTSEVVVIFPSYFFIKHFKILRDFIFFFIIERNNSPLNFCYIFKGTFRIYDRYIKEKITKNKIPCILENICNEQLVLKNQLNKKKRRNKKLTNIELYNDIHLNVEQNKNVHYNNMCCNYDIYKKYFINKKNNMFRCSNFILPIINKCIFLKGGILNVEFLKFSKKDIFFFTTHINKKYRCNQLFLNGPKCFKILIYEEKEEEYFLNLYKSKDNKKTFLLSGSHLHNKLFLLNLQKICSKKKNRI…	1362	0	null	no	GO_0005737	GO_0020011	GO_0005737,GO_0020011	0	0	0	0	0	0	0	0	0	0	0	0	0	0	0	0	0	0	0	0	0	0	0	0	0	0	0	0	0	0	0	0	1	0	0	0	0
1989	PF3D7_0823600	lipoate-protein ligase B	LipB	ATGAATAAAATAAACCTGCTTGTACTAATTTCTTTAACTTTCATTATACTATTAAATCCAAAAATGAAAGTCGGAAAATTAAAAAAGAGAAAAAATTCTGGCTTGTTATATCCATATTTTAAGAATAAATCATTTAGATTAAATAGATATATATTCATAAAACCAATAAAAAGTGTAAAACTAAATTATAAGAAAAAAAAAATGAACCTAACACATGAAATTTGTATTTTAAATTGTAGTGAAAAATTAATAGATTATAAACTAGCTTTTCAACTTCAAAATATCCTACATCATTCAAAAATTATTATGAAAAATAAAAATGAAGTACAAATATCAAATCATTTAGAATTAAAAAAATTCAAAAATTTCAAAGAAAACATGGAAAAATATGATTTCTGT…	MNKINLLVLISLTFIILLNPKMKVGKLKKRKNSGLLYPYFKNKSFRLNRYIFIKPIKSVKLNYKKKKMNLTHEICILNCSEKLIDYKLAFQLQNILHHSKIIMKNKNEVQISNHLELKKFKNFKENMEKYDFCFILQHTPCYTLGSVANCSDILLDKENYYIEELGDIYNNLYSNEIIHLMNKCETIQDKINQSDIYNENTNYFNNFLKHCRQRKIPIYRVNRGGKATYHGPGQLVLYFIFNLKNYPSNYNERIINKHYKYTNKENFPSKTSEYEKNNIYTNSNSKENISSIERTFDLRTTINNFQKIGMETLQKFNIKTHCKKDTIGIFYKDKKIISIGLKITKYISMHGLSLNFNLDNNFLKYLLSCGMNHNDYISMHEINEMKKKNYIYQKGKIAS…	434	0	HMM: MNKINLLVLISLTFIILLNPK, NN: MNKINLLVLISLTFIILLNPK	yes	GO_0005737	GO_0020011	GO_0005737,GO_0020011	0	0	0	0	0	0	0	0	0	0	0	0	0	0	0	0	0	0	0	0	0	0	0	0	0	0	0	0	0	0	0	0	1	0	0	0	0
2025	PF3D7_0827300	conserved Plasmodium protein, unknown function	null	ATGGTGTTACCATTATTATTTATAAATTACAAGAATAATAAATACAAGAATGAATATGCATATAAGCATGTAGTAAAATGTTATAACCTTCCTGAATTTATGTATGAAGGTTTTTTTGAATTTTTAATAAAAAAATATAATAATGAGGACTTATATAAAATAGATGAGATTATAAAACCGTCATATGAAGAAACGAAGTTATATCCACTCAAAATAATTTGTAATAAAAATTTAGGTAATTTTTTAATAAAGAAAGAAAAGATCTTAGTAGTCGATGATATTATGGAAAACAATAAAGTGTATATTAAAATAGATAATGATAAAAATGAATATAATAATAATGATGATGTTATTTATGATAATATTCATATAAATGTGGAAGATAAAAAAGAATGTATA…	MVLPLLFINYKNNKYKNEYAYKHVVKCYNLPEFMYEGFFEFLIKKYNNEDLYKIDEIIKPSYEETKLYPLKIICNKNLGNFLIKKEKILVVDDIMENNKVYIKIDNDKNEYNNNDDVIYDNIHINVEDKKECIQKVSFENNMYIDQGKKTKTEDKQYINNNIFNDLVDNSNVTLKEDNNVTSGDYAYINVHNCVNDENYMMNKRNVQSIERDINKNKKEVQYCEYVDDEMNNLPHNNNNKKNNNNNNNNNNNNDNIYENKYDYYSCCYSDQFDESDSDYSVICAHNNNNNIITCHETCSYNDEHQKYKNKNVKYIEDENNNTGDYASNTSETKSGYSSYKYNNIINYKNNQKNNKKCKKIFYIYFVEGNVQEFIQDINEEDKNKIEEDIIDKILNEEKE…	833	0	null	no	GO_0005737	GO_0020011	GO_0005737,GO_0020011	0	0	0	0	0	0	0	0	0	0	0	0	0	0	0	0	0	0	0	0	0	0	0	0	0	0	0	0	0	0	0	0	1	0	0	0	0
2141	PF3D7_0906200	conserved Plasmodium protein, unknown function	null	ATGAACTTGAGAGAATATATATACATTTTTTTTATTTTATATTTTATCCCTGTAAATAAAATTTGTGTTGCATATAATGTAGAAAAAAATAAAAGGACCATTCTTAGTAATTGTAGGAATGTATTATATCCTCATGGTAAGGGTTCATTATATTATACAAGAAGGAAATACTTGTTTATAAAAAGAAAAAAGGAAAATGATATGAAATATAAAAAGAATAAAATAGGTGAGAAGAAGGATTTATTAAAAAATAGAAGGAATAATATGTATGGTTCCATATTAGAAAATAATAATGTAGGATTTTTAAGTGGTATTAAACAAAAAGTAGGATCATTCATTTTTGGAAGTAATCAAAATATTATTGAGAAATTAAAAAATTTAAATGAAAAAAAAAGTATA…	MNLREYIYIFFILYFIPVNKICVAYNVEKNKRTILSNCRNVLYPHGKGSLYYTRRKYLFIKRKKENDMKYKKNKIGEKKDLLKNRRNNMYGSILENNNVGFLSGIKQKVGSFIFGSNQNIIEKLKNLNEKKSIWFFTGYARNIFQPNSLYNILAFEEIEEIDYKKWSKENKINFDYILNRKLEPGKDDTINKTLCVNVYKVKKYVIFYKNEENMNKTKANNNNNNNNNNNSNNNNNSNNNNNSNNNNNKCNDSYKEKEINIIHNNNSYNSYHCSEHKNDFILCTYIYLMFYIYDKEKKKSYIFSNNIQNNKNCIYQIVEVNKEQYPNLFDNIIMNQDILKKHINIIALEKSNTTYENIIHFIGNNELLNINNYTNKFNSYLKKLYNICNNSSMLIENSI…	578	1	HMM: MNLREYIYIFFILYFIPVNKICVAY, NN: MNLREYIYIFFILYFIPVNKICVAY	yes	GO_0005737	GO_0020011	GO_0005737,GO_0020011	0	0	0	0	0	0	0	0	0	0	0	0	0	0	0	0	0	0	0	0	0	0	0	0	0	0	0	0	0	0	0	0	1	0	0	0	0
2286	PF3D7_0920600	conserved Plasmodium protein, unknown function	null	ATGATAAAATGTATACAACTCTATGTTATTACTGTATGCATACTACTTATAAATATTGCGTGTAAGAAATACAGAGATAATTCTTATGCTGGGTATATAAGGAATAATATACACAATGCTCATAGGACAAGAAAAAAGATATATAGAAGATATGCTCAAAAAAAAAAAGAGAAAGAAACTTATGAAGAATATTTTAAAGAACTAGATAAAATTTTTAATGAATGTGACTATGACGCAGAACAAGTTGAGGAGGAAGAAAAGAAAAAAGAAGAAGAATTAAATTTAATAACAGAAAAGGATTTATTAGAAATTAATTTTTGTAATTATGAAAAGGATCCACGTAGTTTAGCTAACTTGGTTAAAGAAAAAAGTGAAGAAGAAATTGAAAAGGAAAATAAC…	MIKCIQLYVITVCILLINIACKKYRDNSYAGYIRNNIHNAHRTRKKIYRRYAQKKKEKETYEEYFKELDKIFNECDYDAEQVEEEEKKKEEELNLITEKDLLEINFCNYEKDPRSLANLVKEKSEEEIEKENNENNEKNIEHIENIENIENIENNENIKNNTLEYSYDYDRILKKKKFLKEKIEYKDKFILNENHNKLVNNIDTSFMNDFLNNYNNDFNKPFYKARRDQYFAREDLVKHEINNNNQSEYKEERNNSENNNNNNNHILYDEERKSDLHYHKVSKDDQNNEDMLKENLESVLFLKRIRNNFDIKRNIYINETINDIKEKYNNNEDKTNRWHNIKNEDSHKERDEENRFHEYVEEKIKNANTDENVEKLILKKYIKMFSIDDEVLNINEKIK…	1354	0	HMM: MIKCIQLYVITVCILLINIACK, NN: MIKCIQLYVITVCILLINIACK	yes	GO_0005737	GO_0020011	GO_0005737,GO_0020011	0	0	0	0	0	0	0	0	0	0	0	0	0	0	0	0	0	0	0	0	0	0	0	0	0	0	0	0	0	0	0	0	1	0	0	0	0
2298	PF3D7_0921700	conserved Plasmodium protein, unknown function	null	ATGGATTTGAAAAAATGTGTTATTAATTTGATTCTTTTATTTTATATTAACAAGTTTATATGCTATTTTTGTTTTACTCATAATTCCTTTGGAAGTAAAAATAATTGTTTTTTCTTTTTAAATAAAAATAATTATATAAAAAATATCAACATTATTGATCGAGTTAAGAAACTTTCCAACTTTGAACTTCATCTGATTTTTAGAAAGTTAAAAGATCAATCAATGGTAAAAAGTATTCCTGGTCATGTGAGAAGAAAAAAGAAAAAGAAGAAGAAAAAAAAAAAAGGTAAACAAGATGAAGAACCAAAAAAGAAAGTCAACAAAAAATTAGCAAGGAGGAAATTACTTAAATTCTATAAACTTAAAAGAAAAAATGAAGGAAAAGAAGAAAATGTTTTC…	MDLKKCVINLILLFYINKFICYFCFTHNSFGSKNNCFFFLNKNNYIKNINIIDRVKKLSNFELHLIFRKLKDQSMVKSIPGHVRRKKKKKKKKKKGKQDEEPKKKVNKKLARRKLLKFYKLKRKNEGKEENVFDDKEKYSVFDYIEEKMKNPSNNSFNNKVDINMKENDPLFNEGKKKENILLGEKKEEQQEQQKYILEEQQKYILEEQKKYILEEQQNYILEEPENITSDNDIRNNENTEDDKYNDLENVEKKDVETLSKKEEGKTTKKKKKLKKLKKNMHIGKYNRKVYTYKKKVSIDTIHEYILNKQLKDKYILRRDSLKNVFVNMPLFNFYNFYNFFQIDHVEKYNKSKILNLIYYYLYKYKNNVDNKTKYDLIKIDDIIQKYDKITDDKIKMNH…	569	1	null	no	GO_0005737	GO_0020011	GO_0005737,GO_0020011	0	0	0	0	0	0	0	0	0	0	0	0	0	0	0	0	0	0	0	0	0	0	0	0	0	0	0	0	0	0	0	0	1	0	0	0	0
2519	PF3D7_1005900	conserved Plasmodium protein, unknown function	null	ATGATCTTGTGGAACAAAAAATTACTATCAGTTGTTTTCTTATTAATATATGATACAACTAATTGTGTGAAACGATCGGACCCTATGAAAGGGAAACCAAAATCAAACACCAGTCCTCTCCCACATAATGTTATAAAAAAGAAAATGGAACCTATACAAATGTATTTTTTCGCGAAAAGGACAAAAAAAGATATTCAAAGTAATAATAAAAAAAAAAGAAAAACAGATAATTTTCCCATAAATGATAATATAACAAATTGGAAGATAAAAAAAAAACGAAAAAAGAAAAAATTAAAATATGAACACGAAAACGATTATCAGAAATTAGACAATGTAAAAATAAATAAAAGAAATCATTATACACACTTTATTCGTAATATTATATACAATGAAACATTC…	MILWNKKLLSVVFLLIYDTTNCVKRSDPMKGKPKSNTSPLPHNVIKKKMEPIQMYFFAKRTKKDIQSNNKKKRKTDNFPINDNITNWKIKKKRKKKKLKYEHENDYQKLDNVKINKRNHYTHFIRNIIYNETFKNYVEKKKRISYYDIPKNTKYKKYVSSIYKKKQGKNTIYMIIAPKGSLHEKKTKEILGDPVKNYPWEISIPFHETITREQSPYYNFLKGEWAYLDYKRDSRRACGKIEGGLENYDGKGLKLEKGVDRPRYKEIPYYLDHGVEWRNFNHDELIQFDIDPDGNQDQTFLETEEDLEYRQWGNWNYSCAKETTQLNTAWRDPVLSKDLSNLIYPWNHKAHENHIIPYGYRGPSGFIPEPKLEWELAARGFFAGYFDDPNWNRIKYYRIT…	635	0	HMM: MILWNKKLLSVVFLLIYDTTNCV, NN: MILWNKKLLSVVFLLIYDTTNCV	yes	GO_0005737	GO_0020011	GO_0005737,GO_0020011	0	0	0	0	0	0	0	0	0	0	0	0	0	0	0	0	0	0	0	0	0	0	0	0	0	0	0	0	0	0	0	0	1	0	0	0	0
2728	PF3D7_1026300	conserved Plasmodium protein, unknown function	null	ATGGAATTGATCATAAAAAAACCATATATAGAAATATTTGAAAAGATCTTAAAACTGTTTACCCATATTTGTGAAAATGTTCATTTTAAATTAACAAGAAATAAGCTAGAATTAAGCGGCTCAAATAATTTAACAAATGAACTGGTGATACATATTGATAAGAAATTTTTTATATTAAATGATGTAAATGGAGATAAGAAGAATATAATTAATGGCACTGTAAAATCAAAAGATTTTTACAATTGTATATATAATCATAAGATAGTTAAACATCTGAGGAGTACTTATTCACAACATGGATCTTATAATAGTCACAAGAAAAATGATTCACCTTTTCTAATGAAAGATGATATGAATGAAGAAGGAAGAATAAATAATACAAATAATGATGAAATTAAA…	MELIIKKPYIEIFEKILKLFTHICENVHFKLTRNKLELSGSNNLTNELVIHIDKKFFILNDVNGDKKNIINGTVKSKDFYNCIYNHKIVKHLRSTYSQHGSYNSHKKNDSPFLMKDDMNEEGRINNTNNDEIKSIVCDGMYPDDNNKSYFRKDKKWNIHLSKITLKFNNINHNINNNMDGDDHDDNNNNNKLEIIIKFKKYNTYFSAILKLKTFNTPMKNYIYKNESIIQIDPTLFLLNLKDLSNEKNIFLKNTDNSFIISSLETCDFSLNKERIKREQFFYNNKNICIPSSKTKYFFKNKKFQDHNMSLPLNELKTIIKFCSDLNLLCLFSTKNFKENLIIYFGNIISYILEKNKNKIKKKNKNKTFQHKQHTYMLNTNHVKYLPNISRDYKYDYTFD…	1121	0	null	no	GO_0005737	GO_0020011	GO_0005737,GO_0020011	0	0	0	0	0	0	0	0	0	0	0	0	0	0	0	0	0	0	0	0	0	0	0	0	0	0	0	0	0	0	0	0	1	0	0	0	0
3031	PF3D7_1117200	conserved Plasmodium protein, unknown function	null	ATGAGTTGTTATCCATCCGATGAAAAATCAAGAAAAATCAGAAAAAATGACAGCGAATATGAAATAGACACAAATAAATTGGAGTACATAAGTTTCCTATGTGAGGAAGATGACATTAATTATTTTTGTAGTTTCAATGAGGATGAGAATGTAAAAAATTTCAAATTAAAAAAGGACATTTTTGAAGATTCCTACTTAAAACTACTAATAGAAAATGAGAAAATTGAACAAGACGCACCCTCTTGTTATTTTTTATCATATTTGTATAATAACATCTATTTGTATTATTGTGATATACTTTTTCACAATAAAAATAAACAGGTACATAGTATAAGTCATATTGAAAGAGATATTAATTTCTTTAATTACGAAAATGTGGAAACAAAGAAAAAAAAAAAA…	MSCYPSDEKSRKIRKNDSEYEIDTNKLEYISFLCEEDDINYFCSFNEDENVKNFKLKKDIFEDSYLKLLIENEKIEQDAPSCYFLSYLYNNIYLYYCDILFHNKNKQVHSISHIERDINFFNYENVETKKKKKINKSEEIIQNNIRRNNKNLIYIKGDEEKYINKKYINDVNDQNNLYNLNELYKVDKLYNIDKLHFITSHYLAYNKMQNSILQFYIPNFNMNKISKFDKHIKGLNKTYHHSIHYNLGANTISEQSHVLQVDHAPSCKKKKYIFKYHNKIYSKKMKRNNSNKKMKYKKKQIKSSSLNISKLLFPFFGYTTSEESVMSFSKFLPEHKIARKKKKKKKKKRQKEQKEQKKQKEQKEQKKQKEQKKQKEQQTNNIINNDDHHDKPYTYQSKD…	1821	2	null	no	GO_0005737	GO_0020011	GO_0005737,GO_0020011	0	0	0	0	0	0	0	0	0	0	0	0	0	0	0	0	0	0	0	0	0	0	0	0	0	0	0	0	0	0	0	0	1	0	0	0	0
[truncated: 4,974 more rows]
[truncated: 2,548 more columns]
