# Supplementary material for: Proteome-wide analysis of a malaria vaccine study reveals personalized humoral immune profiles in Tanzanian adults
Source: eLife. 2020 Jul 14;9:e53080. doi: 10.7554/eLife.53080 (PMC7386907; doi:10.7554/eLife.53080)
Supplement: Source data 2. [file elife-53080-data2.csv]

Index	GeneID	Product.Description	Gene.Name	CDS	AA.Seq	AA.Len	N.TM	SignalP	SignalP_yn	Predicted.GO.Function.IDs	Curated.GO.Function.IDs	All.GO.Function.IDs	GO_0000015	GO_0000139	GO_0000151	GO_0000172	GO_0000178	GO_0000214	GO_0000221	GO_0000275	GO_0000276	GO_0000439	GO_0000502	GO_0000775	GO_0000786	GO_0000796	GO_0000930	GO_0000940	GO_0005576	GO_0005578	GO_0005581	GO_0005622	GO_0005634	GO_0005663	GO_0005665	GO_0005666	GO_0005669	GO_0005672	GO_0005673	GO_0005674	GO_0005681	GO_0005685	GO_0005694	GO_0005730	GO_0005737	GO_0005739	GO_0005740	GO_0005741	GO_0005743
194	PF3D7_0206000	DNA repair protein RAD2, putative	RAD2	ATGGGTGTTAAAGGTCTTTGGTCCATTGTATCTCCTGTAGGTGTTCGGGTTAATCCCGAGATTTTTACAGGGAAAAGAATAGCAATTGATGTTAGTATATGGTTATATGAACTGACCTATGCTAATAACGTGAAAGACTTACGAAATAAATCTTTTGATAACATGAGCATATTCAATGATTTGTGGATAGATTTTTCTGAAAATATATCTAGTGAAATAAAAACAGATAATATTAAAAAAGCACATCTTTATTTTTTTTTTTTAAGAATATGTAAATTATTGTATTATAATATAAGACCGATATTTATATTTGATGGCAACCCACCAGAATTAAAAAGGAAAACTATATTTCAAAGAAACATTAAGAAAAGGAATTATGAAGAAAAATTTAAAAAAACA…	MGVKGLWSIVSPVGVRVNPEIFTGKRIAIDVSIWLYELTYANNVKDLRNKSFDNMSIFNDLWIDFSENISSEIKTDNIKKAHLYFFFLRICKLLYYNIRPIFIFDGNPPELKRKTIFQRNIKKRNYEEKFKKTAEKLVYNYYQRTLLNSMKSKNKKNDNSNNIEDKTNTPNKTNTQNKSNTQNKSNTPNKINADISKSSLIQIYDDIKEKDKSLNSLVEHVGNVPVSVKDVLTICNDDLSKIKNKIFMITDFGPVLFLGEQDGDMGTVENINKLDNRNKDENNLSYSINYNKVQDVNNNNDDDKDKDKENINEVRRDQKNYVYKNKENINNIYLDDDDEKEDIQNKNGVYNNDDIDEQIIRKKHMARKKYYESIPKTFKGFLCMRRPVDIIDISNYNTE…	1516	0	null	no	GO_0003677, GO_0003824, GO_0004518	GO_0000014	GO_0003677,GO_0003824,GO_0004518,GO_0000014	0	0	0	0	0	0	0	0	0	0	0	0	0	0	0	0	0	0	0	0	0	0	0	0	0	0	0	0	0	0	0	0	0	0	0	0	0
3464	PF3D7_1210900	GPI mannosyltransferase 1	PIGM	ATGGGGCATACACATAAAGAATATAAAAACAATGAGAAGAGTGCAATATTTTTTGAGTGGTTGATTTTTTTTGTGGGTATAATAATTCGTATAATTATTTATTATTATGGAAGGTGGCAAGATAAAAACTTTAATGTTAAGTTTACAGATGTAGATTATTATGTTTTTTCTGATGCTGCAAAATATGTACTTATGAACAAATCACCATATGAAAGATATACATATAGATATACACCTTTATTAGCATATATAATGATACCAAATTTTTTTGTTCATTTTTCTTTTGGGAAAATATTATTTTCATTTATCGATATTCTTGTTACTATTCTTATAAATCAAATTATAAAAATCAAATATACTAATTGTAAAAATTATATATTTTATACTTGTTTATGGTTT…	MGHTHKEYKNNEKSAIFFEWLIFFVGIIIRIIIYYYGRWQDKNFNVKFTDVDYYVFSDAAKYVLMNKSPYERYTYRYTPLLAYIMIPNFFVHFSFGKILFSFIDILVTILINQIIKIKYTNCKNYIFYTCLWFLNPLVIIISLRGNADVIPCFLIIVTIFCIYKKHIFLSSIFYGLAVNFKIYTIIYALPFMLYLNKNYLLGENIFQLNEKKKKKKNDFLLNTFFYIFRIISNFFVELFKLNYEQFLFAICSSSVFLILNCVFYIIYGYEFLYESFIYHIIRRDHRHNFSLFFYLMYLSIEKNSKIIPLITFVPQIILVALFGFKYARTNLELSMFLQTISFIALNKVCTSQYFIWCIPFLPIILCAITLSKRNMFLIISSILFFIVAKLHWLWWAYYL…	441	11	null	no	GO_0016758	GO_0000030	GO_0016758,GO_0000030	0	0	0	0	0	0	0	0	0	0	0	0	0	0	0	0	0	0	0	0	0	0	0	0	0	0	0	0	0	0	0	0	0	0	0	0	0
5347	PF3D7_1477800	acyl-CoA binding protein	ACBP	ATGGCACAAGTATTTGAAGAATGTGTTTCCTTTATCAACGGATTACCTAGAACTATAAATTTGCCCAATGAACTTAAGTTAGATTTATATAAATATTATAAGCAGAGCACCATAGGTAATTGTAATATAAAGGAACCAAGCGCACATAAATATATTGATAGAAAAAAATATGAAGCTTGGAAATCTGTGGAAAATTTAAATAGAGAAGATGCACAAAAAAGATATGTGGATATTGTTAGTGAAATATTTCCATATTGGCAAGATGGGGAATAA	MAQVFEECVSFINGLPRTINLPNELKLDLYKYYKQSTIGNCNIKEPSAHKYIDRKKYEAWKSVENLNREDAQKRYVDIVSEIFPYWQDGE	90	0	null	no	GO_0000062	GO_0000036	GO_0000062,GO_0000036	0	0	0	0	0	0	0	0	0	0	0	0	0	0	0	0	0	0	0	0	0	0	0	0	0	0	0	0	0	0	0	0	0	0	0	0	0
2469	PF3D7_1001100	acyl-CoA binding protein, isoform 1, ACBP1	ACBP1	ATGGCTGAACTCTTTGAGGAAAGTGTTGCATTTATTAATAGTGTACCTAAGAATGTAAATTTGCCTAATGATATTAAGTTAAGTTTGTATAAATATTATAAGCAGAGTACATTAGGTAATTGTAATATAAAGGAACCAAGTAGATTTAAAGTTACTGATAGAAAAAAATATGAAGCTTGGAAATCTGTAGAAAATTTAAATAGAGAGGATGCAAAAAAAAGATACGTTGAACTTAATTCTTTAGAAAATGGTAGCTTAGAAATAGTTAAAAATTGTAATATATATAAACGAAATTTAGTTCAGGTAGAAAAAAATAAGGATTCAAAAAAGAAAAGAAATTTAAAACATAAAAAAGTAGATATGAATAAAACAAAATCGAATGAAAATAATAATAAATGC…	MAELFEESVAFINSVPKNVNLPNDIKLSLYKYYKQSTLGNCNIKEPSRFKVTDRKKYEAWKSVENLNREDAKKRYVELNSLENGSLEIVKNCNIYKRNLVQVEKNKDSKKKRNLKHKKVDMNKTKSNENNNKCNEENVEKNEHSISNDFENSNIENKSNISICHINYNDMSKNLTETELHEVLNSLEKCPPNEDLRNIWSHAVGVANEGFDNIQKELKTLIQKYLDNDIDLGNGKVQYNDIWKGIVLSFCTTVGTEVVEYTNNFLGLINREHTLDDILKFINSFLEDFKTLKVKLHKEYEKDLLKKIEQTIAN	313	0	null	no	GO_0000062	GO_0000062	GO_0000062,GO_0000062	0	0	0	0	0	0	0	0	0	0	0	0	0	0	0	0	0	0	0	0	0	0	0	0	0	0	0	0	0	0	0	0	0	0	0	0	0
2471	PF3D7_1001200	acyl-CoA binding protein, isoform 2, ACBP2	ACBP2	ATGGAAGATTTATTTCAAGCTTCTGTTAACTATGTTAACTCATTACCTAATAATAAACCATTGTCAGTTGAGACTAAGCTAGATTTATATAAATATTATAAGCAAAGTACTGTAGGTAATTGTAATATAAAAGAACCAAGTTATTTTCAATATGCTGATAAAAAAAAATATGAGGCTTGGAAATCAATTGAGAATTTAAATAAAGAAGATGCTAAGAAAAGATACATTGAAATCGTTACAGAAAATTTTCCTAATTGGCAAAATAAAGAATAA	MEDLFQASVNYVNSLPNNKPLSVETKLDLYKYYKQSTVGNCNIKEPSYFQYADKKKYEAWKSIENLNKEDAKKRYIEIVTENFPNWQNKE	90	0	null	no	GO_0000062	GO_0000062	GO_0000062,GO_0000062	0	0	0	0	0	0	0	0	0	0	0	0	0	0	0	0	0	0	0	0	0	0	0	0	0	0	0	0	0	0	0	0	0	0	0	0	0
4175	PF3D7_1329100	myosin F, putative	MyoF	ATGGAAGGTGCAAATAAATGTGTCATAGGAACAAAGATATTTATCAGAGACAAAAATAAAGTTTGGGCTAGTGCTGAAATTATAAATGAAGATGAAGATAACATTATAGTAAAAACTGAAGATGATGATATAATAAAATTAAAAGAAACGGATGAATTTTATCTTCGAAATTTAGACTTATTTGATTCGAGTGGTTTGTCTGCTCCTTCAGATTTAACAAAATTGACACACTTGCATGAGGCATCCATATTACATAGTTTGAATCTTCGTTTTGATATCGATGAAATATATACATTTACAGGTCCAATATTAATCGCTGTGAATCCTTTTAAAATAATAAAAGATTTATATTCTGATAACATGCTTGCTAAACATGTTCAACCTATAAAATCTAAAAGT…	MEGANKCVIGTKIFIRDKNKVWASAEIINEDEDNIIVKTEDDDIIKLKETDEFYLRNLDLFDSSGLSAPSDLTKLTHLHEASILHSLNLRFDIDEIYTFTGPILIAVNPFKIIKDLYSDNMLAKHVQPIKSKSPHIFATSNSAYLGMCNNNKSQTILISGESGAGKTESTKYVMKFLACAGSDIKKRSLIESQVLESNPLLEAFGNARTLRNNNSSRFGKYIELQFSVDHKNYIKGKLCGAKILTYLLEKVRVCDQQEGERNYHIFYQLCKAVKEANIVDNSIMSNNENDDVENYVNYKCDEDKNKDHIENNICEEPTQKKKKWYHFPSTSKFRNLENVEPMKIDFTDFKEHVHFRYLTKSSVYELNEVNELEEFESTVHAMQTIGISNTEQYQIFKIL…	2160	0	null	no	GO_0005524, GO_0005525, GO_0003774, GO_0005515	GO_0000146, GO_0003774	GO_0005524,GO_0005525,GO_0003774,GO_0005515,GO_0000146,GO_0003774	0	0	0	0	0	0	0	0	0	0	0	0	0	0	0	0	0	0	0	0	0	0	0	0	0	0	0	0	0	0	0	0	0	0	0	0	0
4640	PF3D7_1405500	COBW domain-containing protein 1, putative	CBWD1	ATGATTGGGATTACAATAATCACCGGTTTCTTAGGAGCAGGGAAAACTACACTGCTAAAAAATTTATTAAATGAAAGTATTGAGAAAGATAAAAAAATTGCAATAATTCATAATGAATTTACGGAAAAGAACAACAATATTGACAAAATAGTTTTTAAGGATATAAATGATATATATAACATTCCAAAAATTAAAGAAGATGATAAAAATAATGTAAATAATAATTTAAAAAAAGATATACAAAAAAATAAAAATGAATTAAGAATAATAAACGAAATAGATAGTGAAGAAGGTTTCATATATGAACTTAATAATGGCTGTTTATGTTGTTCAAATAAAAGTAATTTTGTTAAATTGATAGAAAATATTTTATCATTAAAAACTAAGTATGATTATATA…	MIGITIITGFLGAGKTTLLKNLLNESIEKDKKIAIIHNEFTEKNNNIDKIVFKDINDIYNIPKIKEDDKNNVNNNLKKDIQKNKNELRIINEIDSEEGFIYELNNGCLCCSNKSNFVKLIENILSLKTKYDYIFVEVSGVYDNIQINNLLWLDELNKSKIYLDSIIHIVDSYHFIKYYNKQEIKQNTKDTLSNEINHEHEKKKKNEANNVYHNEKNNESNNVYHNEKNNESNNVYHNEKQNEANNFGPNEQTPEYEQIMVSDVIILNKIDKLNEHNINELKIFIHKLNPIGTIYTTSYCYVPIENITNLKCYEKKNIKNIIINNTKVENVVSFHYNDFHNMTFHFDHDISSLIQLSDLLNKMKNKFIKQKDTNILKQIVTILKNKNIFSYKKINHILAT…	575	0	null	no	GO_0005524	GO_0000166	GO_0005524,GO_0000166	0	0	0	0	0	0	0	0	0	0	0	0	0	0	0	0	0	0	0	0	0	0	0	0	0	0	0	0	0	0	0	0	0	0	0	0	0
693	PF3D7_0410400	exosome complex component RRP4, putative	RRP4	ATGATGGATATCCTTATCACCACGCCGTATGATAAAGAAGTTTGCGAAATAGGAGAAATTACTAACAAGATAATTTCTCTAGAAACTGTTAAGCATACAAAAAGTAGTTTACATAAAAACCGGGATATACAATGTCCCAACAAAAAGAAACTTGTGTTACCAGGAGAATGTGTTTTAGATAAGAATGATAAAGATCGTTTTTTAAAAGGCGGTGGTTTATATGAAGAAGATGATATGTTTTATGCATGTATTTTAGGTAGAGTGAATTATATTAATAAATTAATATATGTAGAACCTTTAAAAGGAAAGTATACAGGTTCTGTTGGTGATTTATTAGTTGGTAAAATTAAAGACATAAGTAATGATAAATGGATTGTAGAGATAGGTTCATATTGTAGA…	MMDILITTPYDKEVCEIGEITNKIISLETVKHTKSSLHKNRDIQCPNKKKLVLPGECVLDKNDKDRFLKGGGLYEEDDMFYACILGRVNYINKLIYVEPLKGKYTGSVGDLLVGKIKDISNDKWIVEIGSYCRAYLSISQTNISIFSQRIRLYNDVINMIHIYKPDDIIACEIQRISTDGTIILHTRSSIYGKLSNGVLIIVPQTLIHNQKKHIFVFPCNVQIILGMNGYIWISSPIKKSKDTNPNSVDQNIEENKFEDVDHTTRKNITIITNIIKLLVKYHININYDTINKIYVHYTSNTNNTPSYILKPYVADSYLFNYIDKFVSSNQSWAANSTQ	338	0	null	no	GO_0003723	GO_0000175	GO_0003723,GO_0000175	0	0	0	0	0	0	0	0	0	0	0	0	0	0	0	0	0	0	0	0	0	0	0	0	0	0	0	0	0	0	0	0	0	0	0	0	0
1642	PF3D7_0720000	exosome complex component CSL4, putative	CSL4	ATGAATTTTGAAGATGACGATGATATTGTTATACCAGGAGAGTTCTTAGGTTTACAAGCTGAATATATAAACGGTAATAATACATATTTATTAAAAGATGAAATAAGATCAAGTATACTTGGTCAAAAAATTATAAATAAAAATAATGACAAGAAAACAATTATAAGTGTATATAATTTGAAACCACCTTCTTTATATCTTCCCAAAATAGGGGATATAGTAATATGTAAAGTACAACGTGTATCATTCCATATGATATATTGTTATATTCTTTCATCACATAATATATTTACAAAAAACGCATTAAAAGGATTTATATTAAAAAGTGATATACATATAAATGAAGGAGAGTTAGGCGATAATTTTATATGCTTTAAACAAGGAGATATAATAAAAGCT…	MNFEDDDDIVIPGEFLGLQAEYINGNNTYLLKDEIRSSILGQKIINKNNDKKTIISVYNLKPPSLYLPKIGDIVICKVQRVSFHMIYCYILSSHNIFTKNALKGFILKSDIHINEGELGDNFICFKQGDIIKAKVLSIGQYSSYKLSTVGSELGVIAAFNQKGEILRPVAWNLVLNINDMTFERRKASNDFSLLL	195	0	null	no	GO_0003723	GO_0000175, GO_0008312	GO_0003723,GO_0000175,GO_0008312	0	0	0	0	0	0	0	0	0	0	0	0	0	0	0	0	0	0	0	0	0	0	0	0	0	0	0	0	0	0	0	0	0	0	0	0	0
3839	PF3D7_1249900	apicoplast dimethyladenosine synthase, putative	null	ATGATTTATTATTCATTTAAGTTACGCTGGGCTTTATTTTTTTTCCTTCTAGTAACACTTTTTAAAATAAATAATGTTTTTTCAAAAAGGAAACGAAAAACGTATGTAAAAAATGTAAAGTGGTATCCCCAAAGAATTAATCATTACTATATAAACGGTGTAGTGTTCCCAAGAAAGAGAAGAAGGCTCGCCACATTCTTTGTGTTTCTTGGAAATAATGGAAAAAAGAAAAACAAAAGAAATTATAAATTTAATATTAAGAGTAAGTTAAACGTTGAAGGGGAGAACAAAAATGAAGATGACCAAAAAAATGAAGGTGACCAAAAAAATGAAGATGACCAAAAAAATGAAGATGACCAAAAAAATGAAGATGACCAAAAAAATGAAGGTGACCAAAAA…	MIYYSFKLRWALFFFLLVTLFKINNVFSKRKRKTYVKNVKWYPQRINHYYINGVVFPRKRRRLATFFVFLGNNGKKKNKRNYKFNIKSKLNVEGENKNEDDQKNEGDQKNEDDQKNEDDQKNEDDQKNEGDQKNEDDQKNEGDQKKNEYNNKMYNTEPIDDKNQFISRTFEGINIFPIKQNEKDQDYLKTKLPSKEFKPKRSLGQNYLKDTNIIKKMISAIEYNVEHHLFQNKKRMSVRKEEDKKKKNKKKKINNNKKKKKKKNNNNNNNNNNNNQNNNQNNNNNNNNQNNNNYNNNNYNSPNQEQCDDIKTKQYVKDNVENNKKIDEQQNCCKESYNEDKEKNNHNCIDGIYTEDIITKKKKCNNDNITEEGENMNVQNLESLQNDGNGVIELGCGLG…	639	2	HMM: MIYYSFKLRWALFFFLLVTLFKINNVFSK, NN: MIYYSFKLRWALFFFLLVTLFKINNVFSK	yes	GO_0000179, GO_0008649	GO_0000179	GO_0000179,GO_0008649,GO_0000179	0	0	0	0	0	0	0	0	0	0	0	0	0	0	0	0	0	0	0	0	0	0	0	0	0	0	0	0	0	0	0	0	0	0	0	0	0
2765	PF3D7_1030000	transcription elongation factor SPT4, putative	SPT4	ATGTCAGCGTCTAAAGGAAGAAAGAAATCAGATTTAAAAAAAATTGATGATTCGTTTGTAGAAATTAATAAAGATTCTCCGAAGAAATCAAGGAGTGGACTACAAGAAGATAAAGCCTTATTAAAATTACGAGCATGTTTATCATGTCGTATGTTAAAATCGGAAAGTGAATTTTATCAAAATGGTTGTATTAATTGTAAGTTTTTGCAACTAGCGGGAGACAGGCACAGAATTCATGACTGCACTACAGAAAACTTTAATGGCTTTATGGCTATTACAACTCCTAATAAATCTTGGATGGCACAATATAATGATTTGAGTAAATATGCTCCTGGCTTTTATGCTTTACAAGTTATAGGAGAATTACCGGAATCGATAAGAGACCTAAAGCCAAATTAT…	MSASKGRKKSDLKKIDDSFVEINKDSPKKSRSGLQEDKALLKLRACLSCRMLKSESEFYQNGCINCKFLQLAGDRHRIHDCTTENFNGFMAITTPNKSWMAQYNDLSKYAPGFYALQVIGELPESIRDLKPNY	133	0	null	no	GO_0008270	GO_0000182	GO_0008270,GO_0000182	0	0	0	0	0	0	0	0	0	0	0	0	0	0	0	0	0	0	0	0	0	0	0	0	0	0	0	0	0	0	0	0	0	0	0	0	0
5113	PF3D7_1454100	tRNA intron endonuclease, putative	null	ATGATACTTAAAAATAGAAAACGAGAAATTGTTTTCCATGATTTGAATAAACTTTTCATTGTAGTTGATGGTTTTAAATATGGAGCAGATTTTGTACTATATAAAAATAATGTTGATGAAGAACATGGATTTGCTCTAGTTTTTATAAAGGAGGAAAATATATGCTTAAATGAGAAAGAAAAAAACATAATTGTTAGAATATGTGAAAGTGTTAAAAAGAAGGCAATTATTGCTTATATTAATGAAGAGAATAAATCTATAAGATACGAAGAAGTTTTTAGAAAGAGAAAATGA	MILKNRKREIVFHDLNKLFIVVDGFKYGADFVLYKNNVDEEHGFALVFIKEENICLNEKEKNIIVRICESVKKKAIIAYINEENKSIRYEEVFRKRK	97	0	null	no	GO_0000213	GO_0000213	GO_0000213,GO_0000213	0	0	0	0	0	0	0	0	0	0	0	0	0	0	0	0	0	0	0	0	0	0	0	0	0	0	0	0	0	0	0	0	0	0	0	0	0
3820	PF3D7_1248000	tRNA-splicing endonuclease, putative	null	ATGAAAATTATATATGAATTTAAAAAAGAATATTATGAAATAATATTGAATGAAAATAATGCTGACGATAATGTAATTGATTTGTTTGAAAAAAATACTAATAAATGTAATATCGAAATAAAACCCTATGACGATATAAATTCAGACTTACTTGATTTTGATCAATTTAAAATGTTCAATATTGATAAGGATGACATTAAAAAAAAAAATGAGGATAAAAAAGATGAAGATAGGATAAAATATATTTTGGATAAAGAGTCATATAACAATTCGATTGATAAGTTAAACGATAATTCATGTGATGAGTCATGTTATATAACAGATGATGAATTATGTAAGCAAATAAATAATCCATTTGATAATACATATAACAATAAATTCGTTGTAAAATATAAAGAA…	MKIIYEFKKEYYEIILNENNADDNVIDLFEKNTNKCNIEIKPYDDINSDLLDFDQFKMFNIDKDDIKKKNEDKKDEDRIKYILDKESYNNSIDKLNDNSCDESCYITDDELCKQINNPFDNTYNNKFVVKYKEYFEENSFIVKKGDIYGADFLLYITEQKYAHSLYAVYIIYKHYILRDLIRILRVSHSIKKKVILILWNELNCFNISDTLVYIKSYKYK	220	0	null	no	GO_0003677, GO_0000213	GO_0000213	GO_0003677,GO_0000213,GO_0000213	0	0	0	0	0	0	0	0	0	0	0	0	0	0	0	0	0	0	0	0	0	0	0	0	0	0	0	0	0	0	0	0	0	0	0	0	0
4161	PF3D7_1327600	nicotinamide/nicotinic acid mononucleotide adenylyltransferase	NMNAT	ATGCATAAGAATATATGTATATATGGAGGGTCCTTTGATCCAATTACATATGCTCACGAAATGGTTCTTGATAAAATTAGTAATTTAAACTGGATTCATGAAATATGGGTAGTTATATGTAGATGTAGAAATGATAAATCCTTAACAGAATTTCATCACAGACATAACATGTTTACCATAATAATAAATAACTCATCTAAAATAATAAAAAGTAAAATATTTTTAAAAGATCTTGAATCTCATAGTGAAATGACTCCAACTTATGATTTATTAAAAACTCAAAAAGAATTACATCCTAATTACACCTTTTACTTTGGTCTTGGATCAGATTTGATATGTGATATATTTTCATGGGATGAAGGCGAAAAACTAGTTTTAGAAAATGCATTCATAATTATT…	MHKNICIYGGSFDPITYAHEMVLDKISNLNWIHEIWVVICRCRNDKSLTEFHHRHNMFTIIINNSSKIIKSKIFLKDLESHSEMTPTYDLLKTQKELHPNYTFYFGLGSDLICDIFSWDEGEKLVLENAFIIIERGHFKIDESILKKFPKYYLINIPKLSFINFISSSEARKFLTKENDINDIKKYIHPLTIDYIIKYNLYDFN	204	0	null	no	GO_0003824	GO_0000309, GO_0004515	GO_0003824,GO_0000309,GO_0004515	0	0	0	0	0	0	0	0	0	0	0	0	0	0	0	0	0	0	0	0	0	0	0	0	0	0	0	0	0	0	0	0	0	0	0	0	0
502	PF3D7_0315100	eukaryotic translation initiation factor 4E	eIF4E	ATGAAGTATTTAACATTTAATAAAAATAACAGAGATGCTATTGATTTGAGTGAAAAACTAGAAGCTACTAAAATAGATTTATCGAATCCCTTATTATTACAATATAATTGGGTGATATGGGAACAAGTATCAGATAATAAAATAAAACAAAGTAATAATTATAAGGATTATACAAGACCACTAGCTAAATTTAATAGTGTTCAAAAATTTTGGCAATTATGGAATAGATTACCTCAACCAAGTGATTTACTGGCACAAAGAAGTATGACCAGATTTTCAGAAGATGGAATATTTCGTATTGTTGATGCTCTTATGATATTTAGAGATAATATACAACCTATGTGGGAAGATCCAGCAAATTCAGGCGGTGGTCATTTTGAATATAAAATATTACCTAAG…	MKYLTFNKNNRDAIDLSEKLEATKIDLSNPLLLQYNWVIWEQVSDNKIKQSNNYKDYTRPLAKFNSVQKFWQLWNRLPQPSDLLAQRSMTRFSEDGIFRIVDALMIFRDNIQPMWEDPANSGGGHFEYKILPKDYPYSQIDEFWNNLVLAIIGCSLKHYDLITGIRLVDKLSTTRYGYIRIEIWYTTITDESVKNYLRKDLEEHMCNRIDGSTIFPPRVKSLSHIHR	227	0	null	no	GO_0003723, GO_0003743	GO_0000339, GO_0005515, GO_0003743	GO_0003723,GO_0003743,GO_0000339,GO_0005515,GO_0003743	0	0	0	0	0	0	0	0	0	0	0	0	0	0	0	0	0	0	0	0	0	0	0	0	0	0	0	0	0	0	0	0	0	0	0	0	0
2823	PF3D7_1035700	duffy binding-like merozoite surface protein	DBLMSP	ATGAAGAAAATATATAGTATTTTCTTTTCTTTATTTATTTTGAATCTTCATATATATATAAAAAATATCAAATGCAATGACCTAATAAATTATAATGATTCGAATCTAAGAAACGGATTACTAAATAATAGTTTAGATTTAACAAATGGATTAAATAACAAAGATAACAGTTTTATTGATTCTAAAATTGAAGAACATGAAAATAAATCTTACCAAAATAAAGATAATAATATCTCTATCGTTGGACAAGATGTGCCTATTACATCGGTATATTCTTCTAAAATTATAAATGCTAATGATTTAGAAGGAAATAGTATTGACGATACTAAAGGTCTTAGTGTTACTAATAGTGGATTTGATGATGGTAGTGCTTTTGGTGGTGGACTCCCTTTTTCTGGT…	MKKIYSIFFSLFILNLHIYIKNIKCNDLINYNDSNLRNGLLNNSLDLTNGLNNKDNSFIDSKIEEHENKSYQNKDNNISIVGQDVPITSVYSSKIINANDLEGNSIDDTKGLSVTNSGFDDGSAFGGGLPFSGYSPLQGNHNKCPDENFCKGIKNVLSCPPKNSTGRNGDWISVAVKESSTTNKGVLVPPRRTKLCLRNINKVWHRIKDEKNFKEEFVKVALGESNALMKHYKEKNLNALTAIKYGFSDMGDIIKGTDLIDYQITKNINRALDKILRNETSNDKIKKRVDWWEANKSAFWDAFMCGYKVHIGNKPCPEHDNMDRIPQYLRWFREWGTYVCSEYKNKFEDVIKLCNIQQFTNQDDSQLLEISKKDKCKEALKHYEEWVNRRRPEWKGQCD…	697	0	HMM: MKKIYSIFFSLFILNLH, NN: MKKIYSIFFSLFILNLHIYIKNIKCN	yes	GO_0004872	GO_0001791, GO_0046812, GO_0005515	GO_0004872,GO_0001791,GO_0046812,GO_0005515	0	0	0	0	0	0	0	0	0	0	0	0	0	0	0	0	0	0	0	0	0	0	0	0	0	0	0	0	0	0	0	0	0	0	0	0	0
2827	PF3D7_1036300	duffy binding-like merozoite surface protein 2	DBLMSP2	ATGATATATATTTTATCTATTGTATTTTATATATTTTTTTTACATATTGATATATATGTAAACATTTATTCTACATGTTTTGTTGTAAATGAGGGGAACCCTAATTTAAGAAATAACATAATTAATGATGATGAACTAAAGGGGAAAGCATATAATAATACTATAGATGCTAATAACCAAAATATAGAATATAATAAAAACTTAAAGCACAATGTAAACTCATCTCATATATCTAAATTTTCGGATATTATGGATCAAGAAGATAAAGGAGATAATGAAAATTCTCATGACATAAAATTTGAAGAAAAAAAAAATATTAATAAATCTTTAGACGCTGAATCCAATTATGGTATTAATGAAATTAGTATTACTGGTAATGATAGTAATAGTGATAATAGT…	MIYILSIVFYIFFLHIDIYVNIYSTCFVVNEGNPNLRNNIINDDELKGKAYNNTIDANNQNIEYNKNLKHNVNSSHISKFSDIMDQEDKGDNENSHDIKFEEKKNINKSLDAESNYGINEISITGNDSNSDNSNQNIFPDGSELAGGIPRSIYTINLGFNKCPTEEICKDFSNLPQCRKNVHERNNWLGSSVKNFSSDNKGVLVPPRRQSLCLRITLQDFRTKKKKEGDFEKFIYSYASSEARKLRTIHNNNLEKAHQAIRYSFADIGNIIRGDDMMDTPTSKETITYLEKVLKIYNENNDKPKDAKKWWTENRHHVWEAMMCGYQSAQKDNQCTGYGNIDDIPQFLRWFREWGTYVCEESEKNMNTLKAVCFPKQPRTEANPALTVHENEMCSSTLKK…	762	1	HMM: MIYILSIVFYIFFLHIDIYVNIYST, NN: MIYILSIVFYIFFLHIDIYVNIY	yes	GO_0004872	GO_0001791, GO_0046812, GO_0005515	GO_0004872,GO_0001791,GO_0046812,GO_0005515	0	0	0	0	0	0	0	0	0	0	0	0	0	0	0	0	0	0	0	0	0	0	0	0	0	0	0	0	0	0	0	0	0	0	0	0	0
529	PF3D7_0317700	CPSF (cleavage and polyadenylation specific factor), subunit A, putative	null	ATGAGCCCATATCATTTTTACAATAATGTAATAGATAGTAAATCTGTACGAAGTAGCGTATGTTGTAATATTAAAGGTAATGAAAAAAAGTATCTTATATATGCTTGTAATAATCATTTAAATGTATGTTGCATAGATAAGAATGGGAATACTGATGATTATAGTGAGCATGTATTATTTGCTGAAGTTTTAGAATTAAGGGAGTATGTCCCTGAAAAATTAGTTCATTCTACTTATAATAAAGAAAAAGTAAAGTCTTATTTATTTGTGTTAACAAGGAAGTATGTTTTATTATTATTAGAATATGATGTAAAAGAAAATGATTTTATAACATTATCAAAAATAAATTTGTGTGAATTGAATGGATTACATCTAGAAGAGGATGTTATATTTTTGCTT…	MSPYHFYNNVIDSKSVRSSVCCNIKGNEKKYLIYACNNHLNVCCIDKNGNTDDYSEHVLFAEVLELREYVPEKLVHSTYNKEKVKSYLFVLTRKYVLLLLEYDVKENDFITLSKINLCELNGLHLEEDVIFLLDERHKTILFYGYKNILKYIYLDYDNFLNLNNVYTMRIDESLIIDIAFLGTHTMGCNKQLRNKQDDDDKINYGDNKNNYGDNKNNYGDNNNNYGDYNNNYDDNRSNYDDDKSNYDDDKSNYDDDKSNYDDDKSNYDDDKSNYDDDNKYYDRVHKSGNFLCDDIYKNEMLFNKEDLFLEHQNIYKKIKKEMSTDDQDDVPLINKTLYSIGNKSCLEIDKLLKKKSYDFVGTMNYDNNDCRPNSINKLKVEERGKRNYDVRNCNNFDHI…	2870	0	null	no	GO_0003676	GO_0003676	GO_0003676,GO_0003676	0	0	0	0	0	0	0	0	0	0	0	0	0	0	0	0	0	0	0	0	0	0	0	0	0	0	0	0	0	0	0	0	0	0	0	0	0
728	PF3D7_0414500	RNA-binding protein, putative	null	ATGATGATAGAAAACGATGAAACATTAAATGAATTACATAATGATGAAGAATTTTGTATTAAAGAACAATTAAGTCATGTTGATCATGATGAAAAAGTTCATGTAGACAGCATCGTAAAAAAAAGTGAGTGTGCACATAATTATGAACAAAGGGAAAAAAGAGATAGAAGTTCGTCTGTTGATTCTAAGCCAGAGATAAAAAAAATATGTCGCTGCCACGAATCCAACTGTTCAAAAAGCTCCAAATATGAAAAGAGTTCTTGTGGTTCTAAGAATAAAAGTGGAGATTCCTTAAGTACCGCTTCTACAGGAATTAACGAATGTTTGAATAATTCGAAAAATTTAAATGAACCGTTTAAGTTTTTTATCGGAGGTATTCCACAATATATTACAAGCAAG…	MMIENDETLNELHNDEEFCIKEQLSHVDHDEKVHVDSIVKKSECAHNYEQREKRDRSSSVDSKPEIKKICRCHESNCSKSSKYEKSSCGSKNKSGDSLSTASTGINECLNNSKNLNEPFKFFIGGIPQYITSKHITEYFEQYGTVQHVVIAQDHETKRNRGFAFVTMASHINKERILRDTHELNGKRVDVREENNTTPSDIQRKIFVGGLNYYWTKDTLESYFSTFGEIDVVQIVLDSSGRSRCFGFVVFSNENSVAKVLKHKRHKIYDKMVEVRKAEPKKPKMSIKRSNNKNFSKFPPHIPFMAPFPPCNKETMAQWANFMYNTCGVPFLFNQRFQNLPDFYSNYNYYQNSLENIQQSEYNN	363	0	null	no	GO_0003676	GO_0003676	GO_0003676,GO_0003676	0	0	0	0	0	0	0	0	0	0	0	0	0	0	0	0	0	0	0	0	0	0	0	0	0	0	0	0	0	0	0	0	0	0	0	0	0
864	PF3D7_0503300	serine/arginine-rich splicing factor 12	SRSF12	ATGGGGCCATATATAAATCAGAAGAATCAACCCATGTCGTTATTGATAAGAAAATTAAAGTTTGATACATCCCCATCAATTGTAAGAGAAAAGTTTAAAAGATTTGGAGCGATTAAAGATGTATATTTACCAATAGATTATTATACGAAAGAACCTCGAGGGTTTGGTTTCGTAGAATTTTATGATGCAAAAGATGCTGAACAAGCATTAAAAGAAATGAATGGTTCAGAAATTGATGGAAGTAGAATAGAAGTTTTTGTAGCACAGAAAGGAAGATCAGATCCAAGACATATGAGATATAAAGAAAAAGGAGGTTATGCATATAGAAAAAATCCAGATAATAAAATAAGAAGAAGATATATATCGAAATCAAATTCAAGATATGGTTCATATTCAAGA…	MGPYINQKNQPMSLLIRKLKFDTSPSIVREKFKRFGAIKDVYLPIDYYTKEPRGFGFVEFYDAKDAEQALKEMNGSEIDGSRIEVFVAQKGRSDPRHMRYKEKGGYAYRKNPDNKIRRRYISKSNSRYGSYSRDKIRRRERSKERFRYRSSYDRKMSSYRDRKNYHMKSYDKYRDRNHDRSLSRRSREYRNNTSRYRDKRRYDKYYRSTSRRASRHEKRNENYKSKYNHSNDDYSDETRNSSKHSRKEHVSRSISFNSEKDDAKKKNDNTSERDNSNDWKGSEQRKEEEDEEVEKEKENEEEEEAIYD	308	0	null	no	GO_0003676	GO_0003676	GO_0003676,GO_0003676	0	0	0	0	0	0	0	0	0	0	0	0	0	0	0	0	0	0	0	0	0	0	0	0	0	0	0	0	0	0	0	0	0	0	0	0	0
2935	PF3D7_1107100	nucleic acid binding protein, putative	null	ATGCAAGAAGAAAAAACAAAGAAATCTTTAGAACGAGAAGAAATATTTAAAGATACAAATCATAATGAAAAATGTATAAACATGAAAAGGGAAGATTATAAAACAAATAATATGTATGAAGATACAGATATAAATAATGTAAGTAATAATACGTTTAATGAAATATCCGGAAAAGAAAAAAATCAGAATAACATTGAGTATAATGAAAATGTTAAGTCTCATAATAAAACATTAAAATTATCAAATGAAAAGAATAATTTGTCATCAAAAGAAAAAGAAAATATTTTACATAACGGTAGCGGGGAAATTAATGATTATAATAAAATGAAGGATAAAGATATTCCCGGAAAAGATAAAAATGGAAAGACGGACATTGATAATGATAATAATAATAATAAT…	MQEEKTKKSLEREEIFKDTNHNEKCINMKREDYKTNNMYEDTDINNVSNNTFNEISGKEKNQNNIEYNENVKSHNKTLKLSNEKNNLSSKEKENILHNGSGEINDYNKMKDKDIPGKDKNGKTDIDNDNNNNNNDKIKSNNILESEINNIQKNRTDKKKKKNEVNDTIPSTSEGENNINKLNTNKKDTIINNKDEDKKKREPEEKNNDTFQNEQSVYVDEVIKEYPRIFATRLPFEASKKDLEKYFSKFGKIVDIYVSRNISNNKNKGFGFVSFEKQESMNKVLKEKLHIICGKEIVVDVASMRDDKYKHLFHMPSENYLMKNEKKDKRFMKNRNKTNFLKYPIYNNVNNISDISKIGYHNMMYPNVNNFPSTNYQPLAYQDFNMKASFRNVYSPVLYN…	588	0	null	no	GO_0003676	GO_0003676	GO_0003676,GO_0003676	0	0	0	0	0	0	0	0	0	0	0	0	0	0	0	0	0	0	0	0	0	0	0	0	0	0	0	0	0	0	0	0	0	0	0	0	0
561	PF3D7_0320900	histone H2A.Z	H2A.Z	ATGGAAGTTCCAGGAAAAGTAATTGGTGGTAAAGTTGGAGGAAAAGTTGGTGGAAAAGTACTTGGTCTTGGTAAAGGAGGAAAAGGAAAAACAGGTTCAGGTAAAACTAAAAAAGCTCCATTATCCCGTGCATCAAGAGCTGGATTACAATTTCCAGTAGGTAGAGTTCACAGAATGTTAAAGAGCAGAATATCTTCTGATGGAAGAGTAGGTTCCACAGCAGCAGTTTACGCCGCAGCCATTTTGGAATACTTAACAGCAGAAGTTTTAGAATTGGCAGGAAATGCAACAAAAGATTTAAAAGTTAAGAGAATTACCCCAAGACATTTACAATTAGCCATTAGAGGTGACGAAGAATTAGATACTCTTATTAAAGCAACAATTGCTGGTGGTGGTGTT…	MEVPGKVIGGKVGGKVGGKVLGLGKGGKGKTGSGKTKKAPLSRASRAGLQFPVGRVHRMLKSRISSDGRVGSTAAVYAAAILEYLTAEVLELAGNATKDLKVKRITPRHLQLAIRGDEELDTLIKATIAGGGVIPHIHKALMNKVPLPPTAQKKPKKN	158	0	null	no	GO_0003677, GO_0046982	GO_0003677	GO_0003677,GO_0046982,GO_0003677	0	0	0	0	0	0	0	0	0	0	0	0	0	0	0	0	0	0	0	0	0	0	0	0	0	0	0	0	0	0	0	0	0	0	0	0	0
1245	PF3D7_0610400	histone H3	H3	ATGGCACGAACTAAACAAACAGCTAGAAAATCAACTGCTGGTAAAGCCCCAAGGAAGCAATTAGCTTCAAAAGCAGCAAGGAAATCAGCTCCAATCTCTGCTGGTATTAAAAAGCCACACAGATATAGACCAGGAACTGTAGCTTTAAGAGAAATTAGAAGATATCAAAAATCTACTGATCTTTTAATAAGAAAATTACCATTCCAAAGATTAGTAAGAGAAATTGCTCAAGATTATAAAACTGACTTAAGATTCCAATCTTCAGCAGTAATGGCCCTTCAAGAAGCTGCAGAAGCTTACTTAGTTGGTCTTTTTGAAGATACCAACTTATGTGCCATTCACGCAAAAAGAGTTACCATTATGCCAAAAGATATCCAATTAGCCAGACGTATTCGTGGA…	MARTKQTARKSTAGKAPRKQLASKAARKSAPISAGIKKPHRYRPGTVALREIRRYQKSTDLLIRKLPFQRLVREIAQDYKTDLRFQSSAVMALQEAAEAYLVGLFEDTNLCAIHAKRVTIMPKDIQLARRIRGERS	136	0	null	no	GO_0003677, GO_0046982	GO_0003677	GO_0003677,GO_0046982,GO_0003677	0	0	0	0	0	0	0	0	0	0	0	0	0	0	0	0	0	0	0	0	0	0	0	0	0	0	0	0	0	0	0	0	0	0	0	0	0
1320	PF3D7_0617800	histone H2A	H2A	ATGTCAGCAAAAGGAAAAACTGGTAGAAAAAAAGCCTCAAAGGGAACTTCAAATTCTGCTAAAGCAGGACTTCAATTCCCAGTAGGAAGAATTGGAAGATATCTTAAAAAAGGAAAATACGCAAAAAGAGTAGGAGCAGGAGCACCTGTATACTTAGCAGCAGTTTTGGAATATTTATGTGCAGAAATTTTAGAATTAGCAGGAAATGCAGCAAGAGATAATAAAAAATCAAGAATTACCCCAAGGCACATACAATTAGCTGTTAGAAATGACGAAGAATTAAACAAATTCTTAGCAGGTGTCACCTTCGCTTCAGGAGGAGTATTACCAAATATTCACAATGTTTTATTACCAAAAAAATCACAACTTAAAGCTGGTACTGCCAATCAAGATTATTAA	MSAKGKTGRKKASKGTSNSAKAGLQFPVGRIGRYLKKGKYAKRVGAGAPVYLAAVLEYLCAEILELAGNAARDNKKSRITPRHIQLAVRNDEELNKFLAGVTFASGGVLPNIHNVLLPKKSQLKAGTANQDY	132	0	null	no	GO_0003677, GO_0046982	GO_0003677	GO_0003677,GO_0046982,GO_0003677	0	0	0	0	0	0	0	0	0	0	0	0	0	0	0	0	0	0	0	0	0	0	0	0	0	0	0	0	0	0	0	0	0	0	0	0	0
1586	PF3D7_0714000	histone H2B variant	H2B.Z	ATGTCAGGAAAAGGACCAGCTCAAAAATCCCAAGCAGCCAAAAAAACTGCTGGAAAAACCTTAGGACCAAGACATAAAAGAAAAAGAAGAACTGAATCTTTTTCACTTTACATTTTCAAAGTCTTAAAACAAGTACATCCAGAAACAGGAGTAACCAAAAAAAGTATGAATATTATGAACTCCTTTATTAATGATATATTTGACAGATTAGTTACTGAAGCCACAAGACTTATTCGTTATAATAAAAAAAGAACTTTATCATCACGTGAAATTCAAACAGCTGTAAGATTATTATTACCAGGAGAATTATCAAAACACGCCGTTTCAGAAGGAACAAAAGCTGTAACCAAATATACAACAAGTGCTGCTTAA	MSGKGPAQKSQAAKKTAGKTLGPRHKRKRRTESFSLYIFKVLKQVHPETGVTKKSMNIMNSFINDIFDRLVTEATRLIRYNKKRTLSSREIQTAVRLLLPGELSKHAVSEGTKAVTKYTTSAA	123	0	null	no	GO_0003677, GO_0046982	GO_0003677	GO_0003677,GO_0046982,GO_0003677	0	0	0	0	0	0	0	0	0	0	0	0	0	0	0	0	0	0	0	0	0	0	0	0	0	0	0	0	0	0	0	0	0	0	0	0	0
2914	PF3D7_1105000	histone H4	H4	ATGTCAGGAAGAGGTAAGGGAGGTAAAGGTTTGGGAAAAGGAGGAGCTAAGAGACACAGAAAAATTTTAAGAGATAACATTCAAGGTATTACAAAACCAGCCATCAGACGTTTAGCAAGAAGAGGTGGTGTTAAACGTATTTCTGGTTTAATATATGAAGAAATCAGAGGAGTTTTAAAAGTTTTCTTAGAAAACGTAATTAAAGATTCCATCATGTATACTGAACACGCTAAAAGAAAAACCGTCACTGCTATGGATATTGTATACTCCTTAAAAAGACAAGGAAGAACTTTATATGGTTTTGGAGGTTAA	MSGRGKGGKGLGKGGAKRHRKILRDNIQGITKPAIRRLARRGGVKRISGLIYEEIRGVLKVFLENVIKDSIMYTEHAKRKTVTAMDIVYSLKRQGRTLYGFGG	103	0	null	no	GO_0003677, GO_0046982	GO_0003677	GO_0003677,GO_0046982,GO_0003677	0	0	0	0	0	0	0	0	0	0	0	0	0	0	0	0	0	0	0	0	0	0	0	0	0	0	0	0	0	0	0	0	0	0	0	0	0
2915	PF3D7_1105100	histone H2B	H2B	ATGGTATCAAAAAAACCAGCTAAAGCTAAAAAAACCGGAACTGGTCCAGATGGAAAGAAAAAAAGAAAAAAGTCAAGATATGACAGCTATGGACTTTATATCTTCAAAGTTTTGAAACAAGTACACCCAGATACTGGTATTTCAAGAAAATCCATGAACATCATGAATTCATTCCTTGTTGATACTTTCGAAAAAATTGCAACTGAAGCTTCAAGATTATGCAAATATACAAGAAGAGATACCTTATCATCACGTGAAATTCAAACTGCCATAAGATTAGTTTTACCAGGAGAATTAGCTAAACACGCAGTTTCTGAAGGAACCAAAGCTGTAACAAAATTTACCTCCAAATAA	MVSKKPAKAKKTGTGPDGKKKRKKSRYDSYGLYIFKVLKQVHPDTGISRKSMNIMNSFLVDTFEKIATEASRLCKYTRRDTLSSREIQTAIRLVLPGELAKHAVSEGTKAVTKFTSK	117	0	null	no	GO_0003677, GO_0046982	GO_0003677	GO_0003677,GO_0046982,GO_0003677	0	0	0	0	0	0	0	0	0	0	0	0	0	0	0	0	0	0	0	0	0	0	0	0	0	0	0	0	0	0	0	0	0	0	0	0	0
4221	PF3D7_1333700	histone H3-like centromeric protein CSE4	CenH3	ATGGTGAGAACAAAAAAGAATATACCAAATCATAACCCCTTAAATGCATTTAATAGGGACAAGTCATTTAAAACAAACAAAACATTACCAAATAGAACAGTACACCATGGAATTAGTTCCAAGACTACTAATATAAACAGACCCAGTGTAAATAGAGGAGGTATAAATGAAGTTGCACAAAAAAACTTGCACAGGACAAATATAAGGAAACCCCATAGATACAGGCCAGGTGTATTAGCATTAAAAGAAATAAGAGCATATCAAGCATCGACTCAATTATTAATACCTAAAATTCCATTTGTTCGAGTAGTAAAAGAAATTACAAGATTATTTGAATTACCAGATGAGCAATTTCGTTATACACCTGAAGCATTATTAGCTTTACAAACAGCATCAGAA…	MVRTKKNIPNHNPLNAFNRDKSFKTNKTLPNRTVHHGISSKTTNINRPSVNRGGINEVAQKNLHRTNIRKPHRYRPGVLALKEIRAYQASTQLLIPKIPFVRVVKEITRLFELPDEQFRYTPEALLALQTASEAYLVSLFEDAYLCSLHANRVTLMPKDIHLARRIRGRD	170	0	null	no	GO_0003677, GO_0046982	GO_0003677	GO_0003677,GO_0046982,GO_0003677	0	0	0	0	0	0	0	0	0	0	0	0	0	0	0	0	0	0	0	0	0	0	0	0	0	0	0	0	0	0	0	0	0	0	0	0	0
632	PF3D7_0404100	AP2 domain transcription factor AP2-SP2, putative	AP2-SP2	ATGATGAATAAAGAAAAATATGTAGACATTTTAAAAGAGGATAAACCAAGTACTCTATATATTGAAAAAAATATTATTAAAAACAACCATGTCATATTAAATAAAGATAGGAATATTATAAAAACTGTTGATAATAATTTTGAGTATAAGAATGAGTGTTACCAGAAAGATTATAAAAATGATATAATAGATAAAGGAAATGTTTATGATAAATATATTAATAATAATAATAATAATAATGAAGGTACAAAAAAAAATTGTTTGAGATATGATAGATTTCATATTTATGATGATAAAATAAAAAACATCGATGATATAAATGAAACTATAAAAATGAAAGAAGAAAAAATAATAATTCCATTACATACATTTGACGAAAAAAAAACTAATAATATGGAT…	MMNKEKYVDILKEDKPSTLYIEKNIIKNNHVILNKDRNIIKTVDNNFEYKNECYQKDYKNDIIDKGNVYDKYINNNNNNNEGTKKNCLRYDRFHIYDDKIKNIDDINETIKMKEEKIIIPLHTFDEKKTNNMDLKISNNDIYNNMNPCNDNIKNDILEVNIEKEKRNVMNEKGNNFVNNKMGIDNIEGEHKDGIISPNNYIKLKNINENDKINNNDRINNNDKINNNDNINNKKKSSKRTGIPLNERKYYRILAKQMKKIQGLTFDHNQIRWIAYWKNENNKQIQKHFPVCKFGFHEARQLALEFRNLKINDKNKNSNQKNKNINNNNNMNNNNVNNNNVNNNNVNNNNGNYIKKKDKNKKYVINIKNQYNNNGKQYINHYPQNININHMNFNMNNLNM…	2271	0	null	no	GO_0003700	GO_0003677	GO_0003700,GO_0003677	0	0	0	0	0	0	0	0	0	0	0	0	0	0	0	0	0	0	0	0	0	0	0	0	0	0	0	0	0	0	0	0	0	0	0	0	0
3738	PF3D7_1239200	AP2 domain transcription factor, putative	ApiAP2	ATGAGTGATAAAGGTGAAGGAGATAAGGATAATATGAACAAAAATGGTAATGTGTATGACATGATGGATAATGAAAAAAATGAAGAGGTAAATTATATAATAAATGAAGTGGACTCTTCTAATGATTGTAAAAATGAACTTATCAAAATGAACTATGATAATAATAATAATGATAATAATAATAATAATAATAATAATAATAATGATATATCGTATAATGTGTTAAATTCCAATAGTGTTGATACAAAAAATATGGAGAATAGTTGTAAGAATTATGTATATGATAAAGATATTGAAAATAGAGATACTTATGATAATAGTAATAATAAGTCAAATAAATCTGATGATGTAGATAATAAGACAGGTGATATATCGATGAATAAAAATAAACTTGTAAAC…	MSDKGEGDKDNMNKNGNVYDMMDNEKNEEVNYIINEVDSSNDCKNELIKMNYDNNNNDNNNNNNNNNNDISYNVLNSNSVDTKNMENSCKNYVYDKDIENRDTYDNSNNKSNKSDDVDNKTGDISMNKNKLVNTNIYNSEENIYPCTYNTVVENNAYLKNIDIINTIENVEDNNMKNDVCNENNNIINNLYVDNDNWEKKNYVGLTEKLNCLKLEKTNEILEFNKTLDTSKDTQDINVVNEKLSVESNKNNVISNMNNIDSIDNINKMDNIDCIDNMNNIEKQSRKRKKNKLSDKKNLLNNEEYDNKENYDNLHVGNNYINTKDEINKVIQNINLLKALNTNDQKVNELNMDILNKSNEHNDNNEISKQLLDNIILLNSLSKYMNKDDINKQAKEKMKN…	2577	0	null	no	GO_0003700	GO_0003677	GO_0003700,GO_0003677	0	0	0	0	0	0	0	0	0	0	0	0	0	0	0	0	0	0	0	0	0	0	0	0	0	0	0	0	0	0	0	0	0	0	0	0	0
732	PF3D7_0414900	armadillo-domain containing rhoptry protein	ARO	ATGGGAAATAATTGCTGTGCAGGAAGAGATTTACTTTATAAAAATAAACTACAAGAGTTTGGTATAGAAGGATCCAAGACAATAAGAAAGTTGTTATCCTTCACAAGTAATGATATTCTCAGATTTGATAAAGCGTATGATGAAAATGATGTTCAAGAGTTTGTAAACTTATGTTCTTCAACATGCGAAATAGAAAAATTAGAAGATAGAATGCATCCTTGGGCTGCTGACCCCAAAACTATTGGTGCATTATCCGCAACTCAATTGGCAATTTTAGCTAGCAAAGAAAACGAGCCACATTATAAAGATGCAATACGTGAGGCAAATGGAATAGCCGTTTTTATAAATTTATTAAAATCACACGAATTAGATAGAGTACATGCTGCTGTTGTTGCTTTA…	MGNNCCAGRDLLYKNKLQEFGIEGSKTIRKLLSFTSNDILRFDKAYDENDVQEFVNLCSSTCEIEKLEDRMHPWAADPKTIGALSATQLAILASKENEPHYKDAIREANGIAVFINLLKSHELDRVHAAVVALSFLSVDNVKNCICMFESGALPYLISGMKSNIDGMKAACAQTCRNIFVLDKKYKKEFLKLGGITQLVNLLELPSNYDDSQPLYTQLEAIYHLEDFILNDGDEIPEFLEAVKNSNSIKNLKTLQQCPEQDLAEASNVLLLRLTD	275	0	null	no	GO_0005488	GO_0003677	GO_0005488,GO_0003677	0	0	0	0	0	0	0	0	0	0	0	0	0	0	0	0	0	0	0	0	0	0	0	0	0	0	0	0	0	0	0	0	0	0	0	0	0
4848	PF3D7_1427500	DNA mismatch repair protein MSH2, putative	MSH2-1	ATGGAAAATCATGAGGTAGAGGAAGTTAATGAGGATCAAATATTATGCTTATACATAGATACGAAAAAATATCAGAAAAGTTTAGGTGTATGTTTTTATAATTATTTAAAATATGAATTTTTAATGACAGAATTTATTGATAATGGACATTTTACAGCTTTAGAATCTTTATTCATACAGAAAAGACCACATAAGTGTTTTTTCAATAGTACTAATGATTTAGTTGATGATGAAAGACTTTTAAATTTGTTTAAAATTTGTAATGTTCAAGCTATTCCTTTGGAAAAGAAAAAGTATGATGCAACAAATTTAAAAGATGAATTAAAGCTAATTATATCTCATAATGATGATGTAAGAAATTATGATAAACATTTAGAATTAGAAAATGCATGTAAATGT…	MENHEVEEVNEDQILCLYIDTKKYQKSLGVCFYNYLKYEFLMTEFIDNGHFTALESLFIQKRPHKCFFNSTNDLVDDERLLNLFKICNVQAIPLEKKKYDATNLKDELKLIISHNDDVRNYDKHLELENACKCLMVLINYLKLKENQDIHNQCKINIHNMDLYMRLDKAAISALNILPNKKNIHSYNNNTSLLKFLDKCNTTIGSKKLVSWLTQPLTNVAEINKRLNIVEFFIKEDDARNVIFCNYLKRIPELDKLNHYLKEINQNNEIRVNSKYNEEMILKDIVKMYYSILDFKQIYFTLKPIQGKNKETIDEIIINPLRDILNKFSKLLDMIEITIDLEEVQENKVYLISTSFDNELEIIANEKNALMKKIKKHKDDVEKDIFADKYDRTYKRANRE…	811	0	null	no	GO_0005524, GO_0030983	GO_0003677	GO_0005524,GO_0030983,GO_0003677	0	0	0	0	0	0	0	0	0	0	0	0	0	0	0	0	0	0	0	0	0	0	0	0	0	0	0	0	0	0	0	0	0	0	0	0	0
685	PF3D7_0409400	chaperone protein DnaJ	DnaJ	ATGTTAGCTTTAAGAATATTAAGAAGAAAGGTATGTAGTGAGCATTTCCTTTTTGAAAGGTCATTTTTCACACAATCAATAAAAGGAAAGAATGGATGTTTAGTAACCAGATATGATAAAAACAAATTATTGTTTTATTATAAAAGAAATATAAATACTTCAAGAAAATGTTTAAATCAAGATCCTTATACAGTTTTAGGTTTATCTAGAAATGCTACAACAAATGATATAAAAAAGCAATTTCGCTTACTAGCCAAAAAATATCATCCAGATATTAATCCATCTCCAGATGCAAAGCAAAAAATGGCTAGTATTACTGCAGCATATGAATTATTATCAGATCCTAAAAAGAAAGAGTTTTATGATAAAACAGGAATGACTGATGATTCAAATTATCAA…	MLALRILRRKVCSEHFLFERSFFTQSIKGKNGCLVTRYDKNKLLFYYKRNINTSRKCLNQDPYTVLGLSRNATTNDIKKQFRLLAKKYHPDINPSPDAKQKMASITAAYELLSDPKKKEFYDKTGMTDDSNYQNHSSNFEGAFSGFGDASFMFTDFAEMFTNMAGGNKNTSTRGEDIQSEITLKFMEAIKGCEKNIRLNVKVSCNNCNGSGKKPGTNLTICKVCNGSGIQRMERGPIIIGVPCRNCSGNGQIINNPCKHCSGSGVKFQTKNITLDIPPGIKKGMQMRIPNQGHCGYRGGKSGHLFVTINIEPHKIFKWVDDNIYVDVPLTIKQCLLGGLVTVPTLNGDMDLLIKPKTYPNSEKILKGKGPCKVDSHNNGDLIIKFSLKIPEKLTPRQVE…	672	0	null	no	GO_0031072, GO_0051082	GO_0003677, GO_0003688, GO_0051082	GO_0031072,GO_0051082,GO_0003677,GO_0003688,GO_0051082	0	0	0	0	0	0	0	0	0	0	0	0	0	0	0	0	0	0	0	0	0	0	0	0	0	0	0	0	0	0	0	0	0	0	0	0	0
3964	PF3D7_1308100	CCAAT-binding transcription factor, putative	null	ATGGAAAACCAAAACAATGAAGAACAAACTAATAAGATTAAAGAAACTTTATTTGGTCTTTCTACAGGTATTATTCAAAAAGCTATAAATAATAATGTTGATTTAAGAAATTATCGAATGAGAAAAGAAGCACTCGAGACACTAGGGAAATGTTTGTCTATGTTTATTTTATATATAACTGATGGAGCTATGGAATATTGTGAAAATGAAAAAAGATCTACCATACTGGTCAGAGATATTTTAAATTCTTTAGATGATTCTTTATTTCTAGATATACATGATGAATTGAAAAGACAGCTAACTATTCAAGAAGAAAATAATAAAACGGAAATATCAAAAGTATCAGAAAATGTACAAGCTCAATATGCTTCAAACAATGAACTTAATAATAATCAAAAG…	MENQNNEEQTNKIKETLFGLSTGIIQKAINNNVDLRNYRMRKEALETLGKCLSMFILYITDGAMEYCENEKRSTILVRDILNSLDDSLFLDIHDELKRQLTIQEENNKTEISKVSENVQAQYASNNELNNNQKEGKPKNKDDDFDILLQALE	152	0	null	no	GO_0046982, GO_0043565	GO_0003677, GO_0003700	GO_0046982,GO_0043565,GO_0003677,GO_0003700	0	0	0	0	0	0	0	0	0	0	0	0	0	0	0	0	0	0	0	0	0	0	0	0	0	0	0	0	0	0	0	0	0	0	0	0	0
4338	PF3D7_1346300	DNA/RNA-binding protein Alba 2	ALBA2	ATGCCGGGTAGCACAAAGAGTGATACAAAATTAGAAAACGAGATTAGAATTAGTTACAAGAGTGATGCATTAGATTATGTCTATAAAGCTATTGTATTATTCGAGACCTATGATGAAATTATTTTATCAGGAGTAGGAAAAGCTATAAGTTCTGTTGTTAATGTAGCTGAAATGGTAAAAAGGAGAGCCAAGGGCTTACACCAGTTTACCAAGCTTTACGAAAAGGAGCATGTAATTAAAAGAGAGGATAATAGTGGCTTGAAAAAGAACGCAAAAAATGAAGACAAGAAATCGGGGGATGAAGAAGAGGAAGAAGAAGAAGAAGAAGAAGATGAGGAAAACAATAAAAACAAAGAAGCAAATAACAGAACTGTTGAATTTATTACTACTGTTCCATGT…	MPGSTKSDTKLENEIRISYKSDALDYVYKAIVLFETYDEIILSGVGKAISSVVNVAEMVKRRAKGLHQFTKLYEKEHVIKREDNSGLKKNAKNEDKKSGDEEEEEEEEEEDEENNKNKEANNRTVEFITTVPCMKIILSKNEDKIDKNEIGYQKPLDEKEVNVMTPEQILKEKSYRRRYRRGGRGGDRFRSYRRNYYETSMWNNRRYEKRN	211	0	null	no	GO_0003676	GO_0003677, GO_0003723	GO_0003676,GO_0003677,GO_0003723	0	0	0	0	0	0	0	0	0	0	0	0	0	0	0	0	0	0	0	0	0	0	0	0	0	0	0	0	0	0	0	0	0	0	0	0	0
4350	PF3D7_1347500	DNA/RNA-binding protein Alba 4	ALBA4	ATGGAAAATGATAAAAAACATAACCAAAAACAAAATAATGTTGACGAAAATGAATTCCCCAATTCAAAGGTATTACTAGTATCTGTAAAAAGGACCAGAAGATTTTTAGAAAGAACTGCTAGGGAATTATTAGCTGGAGGAACACGATATATTATATTAAGTGGATTAGGAGATGCATTACCTTTGTGTGTTCAATTACAATCATCATTACAATCAAAGAATGCAGCTAATGTTGTAAAAATTGAAACATCATATAGTTATTTTAATTCTAACTATTCTTATACACCTGGTTTAAAAATATATATGGAAAAACATCCAGAATTTAAAGGTTCTAGAATATCTCCAGGATATGTAAGTTTTCATGAGAAAACAGATAGCTTTACCCCTATTTATGATGAA…	MENDKKHNQKQNNVDENEFPNSKVLLVSVKRTRRFLERTARELLAGGTRYIILSGLGDALPLCVQLQSSLQSKNAANVVKIETSYSYFNSNYSYTPGLKIYMEKHPEFKGSRISPGYVSFHEKTDSFTPIYDENPNEYICSLNAGDNNLYVGGEGINGAFSELLSSHNQEVDKYESLFKELLTKAVNENGEKPDEEVKSVLYDNVDKKYPDVKLALCRIRNSLKKGSDHSTGSVFIVTFKKNFPHKKEKNMGMVYVVGPKGKNYNSVEEFLDEVQETAENLMTTLCDYNGLVKREEIKHVRMNTCRICLFSGSIFKHPNASKLDVAKAILNGLAVGYRHGPSPRLNFAYDENVFKDAWVETTGLQVFNHNEQ	372	0	null	no	GO_0003676	GO_0003677, GO_0003723	GO_0003676,GO_0003677,GO_0003723	0	0	0	0	0	0	0	0	0	0	0	0	0	0	0	0	0	0	0	0	0	0	0	0	0	0	0	0	0	0	0	0	0	0	0	0	0
1896	PF3D7_0814200	DNA/RNA-binding protein Alba 1	ALBA1	ATGAAGAAAGATAGAGAACCAATAGACGAAGATGAAATGAGAATAACCTCAACCGGAAGGATGACCAACTATGTTAACTATGGTGCAAAAATACTAGGAGATGAAGACAAAAAAAGTATAAAAATTAAAGCAACAGGTAATGCTATTGGAAAAGCTGTAACATTAGCAGAAATAATAAAAAGAAGATTTAAAGGATTACATCAAATAACCAGATGTGGAAGTACAGTTATCACTGATCAATATGTAAGTGGACAAGATAATAGCGAACATGTAGTACAAGAAAAAACCGTTTCATTTATTGAAATATTATTATCTAGAGAACAATTAGATATGAAAGATGCAGGTTATCAACCACCTTTGGATGAGAAATATGTAAAAGAAATGACCCCAGAAGAAATT…	MKKDREPIDEDEMRITSTGRMTNYVNYGAKILGDEDKKSIKIKATGNAIGKAVTLAEIIKRRFKGLHQITRCGSTVITDQYVSGQDNSEHVVQEKTVSFIEILLSREQLDMKDAGYQPPLDEKYVKEMTPEEIVNSRPFRRGGFRPRFYRGFRGGRGGFLRRGGYRGFGDRVYEPRSSFRGGRGSGYGGNFGRGGYRSGGGMGGGFRGGFRGGFRGGRDGGYRGGNRGGSRSGFRGGRGGFRGGRALS	248	0	null	no	GO_0003676	GO_0003677, GO_0003723, GO_0003729, GO_0000900	GO_0003676,GO_0003677,GO_0003723,GO_0003729,GO_0000900	0	0	0	0	0	0	0	0	0	0	0	0	0	0	0	0	0	0	0	0	0	0	0	0	0	0	0	0	0	0	0	0	0	0	0	0	0
2522	PF3D7_1006200	DNA/RNA-binding protein Alba 3	ALBA3	ATGGCAAGCACAGAAGAAGTATCTCAGGAAAGATCTGAAAACTCAATACAAGTTTCTATGACTAAGAAACCAACCTTTTATGCAAGGATTGGTAAAAGGATGTTTACAGGAAATGAAGAGAAAAACCCATTTGACGAAGTCATAATAACAGGTCTTGGAAACGCAACAAAAATTGCTATAGGTGCAGCATCCATAATGGAAAAAGAGGATATAGGCCAAATTGTAAAAGTACAAACAGCTTATTTTAGTTCAGACAGAATTAATAGAAGAATCCCCAAAATTACCATCGTCCTAAAAAAACACCCAGATTTTGTAGCAAACTAA	MASTEEVSQERSENSIQVSMTKKPTFYARIGKRMFTGNEEKNPFDEVIITGLGNATKIAIGAASIMEKEDIGQIVKVQTAYFSSDRINRRIPKITIVLKKHPDFVAN	107	0	null	no	GO_0003676	GO_0003677, GO_0003723, GO_0005515	GO_0003676,GO_0003677,GO_0003723,GO_0005515	0	0	0	0	0	0	0	0	0	0	0	0	0	0	0	0	0	0	0	0	0	0	0	0	0	0	0	0	0	0	0	0	0	0	0	0	0
1396	PF3D7_0625300	DNA polymerase 1, putative	null	ATGAAATTGTTTGATTCATTTTTTAAACATGCTTTGATAAGAATAAATAAAAGGAATATAATATATTTGAATGCCACTAGGTACTATTGTAATAACATAAATTATAATGCTTTGATAAATTTGTTAAATAAGAAAAATGATATAAATAAAGAAATAAATGCCTTATATTCTTTATTAGAAAGACTGTCAAATTATAAGTACAAACAATATAAAGATAAGTTGACTCTGAAAAATAATATAAACGATGAAATTAAAATAACAAATGCTGATAAAATTAATAATATAAATATTGAAAGGGATATGAATATTTCTCATTTGGATCATCATCATAATAATCATCATCATAATAATAATCATCATAATATTAATCATAATAATCATCATCATAATAATCATCAT…	MKLFDSFFKHALIRINKRNIIYLNATRYYCNNINYNALINLLNKKNDINKEINALYSLLERLSNYKYKQYKDKLTLKNNINDEIKITNADKINNINIERDMNISHLDHHHNNHHHNNNHHNINHNNHHHNNHHNINHHNNHHNNHHNNNHFNDYKKLIDNWKNDKIKIFISWCPEIVEDKYKSKCFSIPTYITFHIVITNNDIKLNNLLHNSHEYDDWNFNKIIQTINNQNNLKDKEKEKENGQQHSQEYIGNCKKGESEIPSYDFKESLLEHINESSQLNHSILSHKTKEQTHHTNNNINGNYNNDEHIEEEGKAKTKQNKTKNSIIEEKKKKTKKKKDEESHNDIINYTIKKKTNTNNSLYNIESILNIPKTYEPNIHYDKCIHKEQNHIFFFSFNI…	1444	0	null	no	GO_0003677, GO_0003887	GO_0003677, GO_0003887	GO_0003677,GO_0003887,GO_0003677,GO_0003887	0	0	0	0	0	0	0	0	0	0	0	0	0	0	0	0	0	0	0	0	0	0	0	0	0	0	0	0	0	0	0	0	0	0	0	0	0
3113	PF3D7_1125300	DNA-directed RNA polymerase	mtRNAP	ATGTTTGTATGTAAAAAATGTTCAAGATACGTAATTAAGAAGATTTTCTATACGTTTATATGTGAGAGCAAATATCAGCTTCTGTTTTTAAGAAAAGGAAATGATTATAAAAATATTTTTTTTTTGGAGAAAGGATATATTAGTACTCATGTAAGAGGTGACAAAAAAGAAAGAACACAAAAAAAAAAAAATGATTTGGATATAAAAAGGTTGTTTTTGGATAAGCCCAGTACACCAAACATAAAAGATGAATATGAAAAGAAAACAAATGATAACAACAACATGGAAGAGTATAACATATGTAATAATAATATTATTACTAATAATAATAAAATAAAAAATTCTTCACATATGAATACTTTTAATAGTAATAGGAAAAAGGTATGTGTGAAGGATAAT…	MFVCKKCSRYVIKKIFYTFICESKYQLLFLRKGNDYKNIFFLEKGYISTHVRGDKKERTQKKKNDLDIKRLFLDKPSTPNIKDEYEKKTNDNNNMEEYNICNNNIITNNNKIKNSSHMNTFNSNRKKVCVKDNINNNTINNNYEEQKENKEEYINTPKAKNNLYNLPYKNKDTHIIDKKKLDEQVVKELHNLIISIKKIDKDKKENIIKYINTLNKKYVKNINKNIIVFFENLDIYMSVNGLLICDIGGEEIFNYINKIKLTNNIDIKKETYNDDIEKHNVNTNERFLHMDDVTKEDNININNMFDINYIKEKKKRIYGDNIYPIVVKSEEKEEVVPKKKKKNSNNIIVHNNNIINNKCGDYNIINCTNDLGEKTKNHQTNYSNNPKFDYQYNEEKEKE…	1531	0	null	no	GO_0003677, GO_0003899	GO_0003677, GO_0003899	GO_0003677,GO_0003899,GO_0003677,GO_0003899	0	0	0	0	0	0	0	0	0	0	0	0	0	0	0	0	0	0	0	0	0	0	0	0	0	0	0	0	0	0	0	0	0	0	0	0	0
3206	PF3D7_1134700	DNA-directed RNA polymerase I subunit RPA2, putative	RPA2	ATGGCAGAGGAGGTAAATAGAAATATTAAAAGGACGTCTGAATTGATTAATAATAATAAAGTAGATAAAAGTTTTTTAAAAAATATCAACCTACAAATTACGGATGGAGAAATAAAGTTACATTTAAAAATTATTGAAGCCTTATATCCTAATATGAAATTAAAAGTCGATAAATTAATAAATGGAAGTTATAATATTTTTACCAAATTCTTAGTACAATCACATATAGATGATTTTAACTCCTTTATAAATGTTTATATAAAAAATATTGCTGAAAATATACCAATAATGGAATTTTCACCTCAGCAAAATAATTATTCTCTTTTAAATATGAATAAAAACAATTCTGAATCTGTAAAATTTTTCGTGAGTGATATACAAATAAAAAATCCAATGATA…	MAEEVNRNIKRTSELINNNKVDKSFLKNINLQITDGEIKLHLKIIEALYPNMKLKVDKLINGSYNIFTKFLVQSHIDDFNSFINVYIKNIAENIPIMEFSPQQNNYSLLNMNKNNSESVKFFVSDIQIKNPMIKNDKGEYRADYPYLCKLSARTYEGELLIKINRQYKDEIASTTICAGHIPIMIMSNLCNLSNLNKKELAQKGEDQSLLGGFFVVSGRLKVIRYVIHPKYNTLLLNADNKIHINCLLNDNTVVINFLTLTRNNSYVYGFRFQNAVCSLPFHLLLMILSPIKKKSYIFNKIKLGVENENAIKYIELFINSIFLKDTFNEKELFEKYNLSYLGRIAYLRRGIFKYNLNCYEKKAKDILKYCILPHIKNNSEKFETMCFMFKKLIYSNFKL…	1517	0	null	no	GO_0003677, GO_0003899	GO_0003677, GO_0003899	GO_0003677,GO_0003899,GO_0003677,GO_0003899	0	0	0	0	0	0	0	0	0	0	0	0	0	0	0	0	0	0	0	0	0	0	0	0	0	0	0	0	0	0	0	0	0	0	0	0	0
4518	PF3D7_1364800	DNA-directed RNA polymerases I, II, and III subunit RPABC1, putative	RPB5	ATGGAAGATCCAGTAACGAGGTTTTATAAATGTCGAAAAACGTGTTGTGAAATGTTGGAGGATAGGGGTTATATTATGACTCCAAGAGAAAAGCTTGAAAACTTTTCAACTTTCAAAGAAATGTTTGAGGATAATGATAGACAACGATCTAAAATGGGTATTAGTACTACTCATAAAAATGATTCAAACAATAGAATTATAGTTTATTTTGCTGATGAAGTTAAAAAAACAGGGGTTAAACCACTAAGGGAATTAACCGAAAGGATGGAAGAAAAATCAATTCAGCGTGCTATTCTTGTAACACAAAATATATTAACCCCTTTTGCCAGAGATGCCATTAAGGAAGCAGCACCAAGACACATTATAGAAAACTTTTTGGATACTGAATTATTGGTTAAT…	MEDPVTRFYKCRKTCCEMLEDRGYIMTPREKLENFSTFKEMFEDNDRQRSKMGISTTHKNDSNNRIIVYFADEVKKTGVKPLRELTERMEEKSIQRAILVTQNILTPFARDAIKEAAPRHIIENFLDTELLVNITKHELVPRHIPLTSDEKKNLLQRYKIMENKLPRIQDVDPVCRYFGLSKGQVVKIIRPSETAGRYVTYRLVV	205	0	null	no	GO_0003677, GO_0003899	GO_0003677, GO_0003899	GO_0003677,GO_0003899,GO_0003677,GO_0003899	0	0	0	0	0	0	0	0	0	0	0	0	0	0	0	0	0	0	0	0	0	0	0	0	0	0	0	0	0	0	0	0	0	0	0	0	0
4172	PF3D7_1328800	transcriptional regulatory protein sir2a	SIR2A	ATGGGTAATTTAATGATTTCCTTTTTGAAAAAAGACACACAAAGTATTACTTTGGAGGAGCTAGCCAAAATAATAAAAAAATGCAAACATGTAGTTGCCTTAACAGGGTCAGGTACATCTGCAGAAAGTAACATCCCAAGTTTTCGAGGGTCATCGAATTCGATATGGAGTAAGTATGACCCAAGAATATATGGAACTATATGGGGTTTTTGGAAGTATCCTGAAAAGATATGGGAAGTAATAAGAGATATATCATCCGATTATGAAATAGAAATAAACAATGGTCATGTAGCTTTATCAACTTTAGAAAGTTTGGGTTATTTAAAATCAGTAGTAACACAAAATGTAGATGGATTACATGAAGCTAGTGGGAATACAAAAGTTATATCATTACATGGG…	MGNLMISFLKKDTQSITLEELAKIIKKCKHVVALTGSGTSAESNIPSFRGSSNSIWSKYDPRIYGTIWGFWKYPEKIWEVIRDISSDYEIEINNGHVALSTLESLGYLKSVVTQNVDGLHEASGNTKVISLHGNVFEAVCCTCNKIVKLNKIMLQKTSHFMHQLPPECPCGGIFKPNIILFGEVVSSDLLKEAEEEIAKCDLLLVIGTSSTVSTATNLCHFACKKKKKIVEINISKTYITNKMSDYHVCAKFSELTKVANILKGSSEKNKKIM	273	0	null	no	GO_0070403	GO_0003677, GO_0005515	GO_0070403,GO_0003677,GO_0005515	0	0	0	0	0	0	0	0	0	0	0	0	0	0	0	0	0	0	0	0	0	0	0	0	0	0	0	0	0	0	0	0	0	0	0	0	0
4424	PF3D7_1355100	DNA replication licensing factor MCM6	MCM6	ATGTCAGCTATATTTAATGAAAGTGAATTATCCGGACTAGATGCCCATAGTGCCTTTGGTAATAATGAAACTTCCAGTTTTCAAAAGAAGAAAAGGCGAATCGACGAAAATTCTCAAATGAGTGTAAATGATTTAGTTGATGATGGGGAAGAGGAAGAAGATGATGATGATGATGAAGAAGAACCATCATATGTTCAAGATCAAAATATGGCTAAAGTATTTGAGAAATTTTTAAAAACATTTTCTGAAAAAAAAAGTGAAGAAGATGATGATGATGGTGATAGTATTTGGAAAGATAGTTTAAATTTTGATTTTCCAAGTAATTTAGAAATAGCAAAAGATTCTCATTATGTACTATTATTATTTTCTATTCTTCAAAACTCTTATTCAAGAAATAAG…	MSAIFNESELSGLDAHSAFGNNETSSFQKKKRRIDENSQMSVNDLVDDGEEEEDDDDDEEEPSYVQDQNMAKVFEKFLKTFSEKKSEEDDDDGDSIWKDSLNFDFPSNLEIAKDSHYVLLLFSILQNSYSRNKVLIVDMKHVLMWEPTDKNRFDIGSQLYMYIKRHFLRILDIFEKKVQLLAESINPIKTKEVGKICLRFYNKKNPIHSLRSLRCEMLGEMISVRGQVTRTSDVRPELTLAAFKCNECGNIINGVKQQFRYTQPSKCPSASCSNMSDWSLVLEQSYFVDWQKIRLQEIAQESPPGSMPRNMDVILRNDIVDSVHAGDRIIVTGCLIVVPDIPTLMKPGDVPRSVARQLLKKNENSLVSQGLTGIKGVGVQDLNHKLCIYACQIEKLNSS…	929	0	null	no	GO_0005524, GO_0003677, GO_0003678	GO_0003677, GO_0008094, GO_0005515	GO_0005524,GO_0003677,GO_0003678,GO_0003677,GO_0008094,GO_0005515	0	0	0	0	0	0	0	0	0	0	0	0	0	0	0	0	0	0	0	0	0	0	0	0	0	0	0	0	0	0	0	0	0	0	0	0	0
4447	PF3D7_1357500	DNA helicase, putative	null	ATGGAGGTATTTAATTTCGGTAAATATAATGGAAAGACATTCGAAGAAGTTTTTGAAAAGCACAAATCCTATGTTACTTGGGTGAAAAGTTTGGAAAGTCCATCAGGCTCATTATTGGACTTTAAAAATTATGTTTTACAAAAGGAAGGCAAAAAAAATAGCAGTAACATGGCAAATAATAACCATTATAATAATGAAAAGAATTCAAATAATAATTATAGCAATAATATGTATGAAAATAATGTTAGAAGTCCTAATATATATAACGAACAATATACAAATAATAATAAAATGAAAGAAAATTATGATAGGAATGCTAATATGAATAATAATGAAATATGTACAAATAATAATAGAATAAACGAAAATAATGTTAAAAGTCCACATTATTATAATAAT…	MEVFNFGKYNGKTFEEVFEKHKSYVTWVKSLESPSGSLLDFKNYVLQKEGKKNSSNMANNNHYNNEKNSNNNYSNNMYENNVRSPNIYNEQYTNNNKMKENYDRNANMNNNEICTNNNRINENNVKSPHYYNNEKNINNYSHECNRSKIAYKHNYSENRNSYNNFEKSSVDTNYTNEEKKKFHNMNSSEYRNYEEKVMSDINNAYNQPEEKKEFDIIVAFEIFSDDSFKIVQKDNNNKKFVSFRNFISKDLFKIISELNPTLKKINNYTCITFEAEKYEYVLNNLKEKCTILGGVHTIPNFLLKCFKNYTKFSEPQRISEITANILTNTMCSYTKQHYDKLDHLLGEKLSVELRNFQREGVFFGLKKNGRVLIGDEMGLGKTLQALALMAFYKDDWPFI…	906	0	null	no	GO_0005524, GO_0003677	GO_0003678	GO_0005524,GO_0003677,GO_0003678	0	0	0	0	0	0	0	0	0	0	0	0	0	0	0	0	0	0	0	0	0	0	0	0	0	0	0	0	0	0	0	0	0	0	0	0	0
4309	PF3D7_1343400	DNA repair protein RAD5, putative	RAD5	ATGACTAGTTCAAATTATTTTAAAAATGATAGCAAGGTCTATAAAGAATCTGATAAAATATCAAACTATAATTATGACAGTGATGTGATAGAAATAATTAGTTTAAATGATAATGATACAATTAATAGTAATACTCAAAATTCAAGTTATTTTTCGAAGGATGTTAAAAAGAATATAGAATATAATAAAAACAAGGAAATGTCTAGCGACATTGAAATTATTGAAGACATAGGTAATTATAAATATGAAAAAATAAAACTGGAAAAGTTAAAAGAACATCAATTAAATTCTAAGAAAGCAGAATTTATTAGAAATAAAGGAGTTTATTTTGAATATTACCTTGGTTGTATAGAAACAGAATCTATTATTTTATCAAGTGAAGTATGTGAAATTAAAGAT…	MTSSNYFKNDSKVYKESDKISNYNYDSDVIEIISLNDNDTINSNTQNSSYFSKDVKKNIEYNKNKEMSSDIEIIEDIGNYKYEKIKLEKLKEHQLNSKKAEFIRNKGVYFEYYLGCIETESIILSSEVCEIKDDKNVIISYEISPKSTKRSYSPMYTLKINNNYDISNDYIRIIGRNIPMNNKKVKKKKVSNNKKKNSASSNDGYNEQNYDTNKIISADQKFVEYDKCKSEVLKDIYEGYSCIRIKHNNRDISKLKSNLSKTLSVLLVLNAIRIEIKLEKISQSELKFGGSLKTFVHVILYPDAFKIDSHKFHEYNSLIKYSVNNMFKELKIIPLRLAKNIDEETLETYNVNKDELLKSVSPLKSIIINYNNKNDQVMNKSGETSTGFCTPHKALGYIE…	1452	0	null	no	GO_0005524, GO_0003677, GO_0005515, GO_0008270	GO_0003678	GO_0005524,GO_0003677,GO_0005515,GO_0008270,GO_0003678	0	0	0	0	0	0	0	0	0	0	0	0	0	0	0	0	0	0	0	0	0	0	0	0	0	0	0	0	0	0	0	0	0	0	0	0	0
4669	PF3D7_1408400	FANCJ-like helicase, putative	FANCJ	ATGATTGAACAAAAGATACATAAGAGATACAAAATAGTAAAGAAAGATGATGTGAATCATCGATATACGATTAACGATATAGAAGTATATTTCCCATATGAATTATATGATTGTCAATATAATTATATGCTTAGTGTATTGAGTGCTTTAAAAAAAAGAGAAAATGCAATATTAGAATCTCCTACAGGTACAGGGAAAACATTATGTTTGTTATGTGCAAGTATTAGTTATGTTGTGGATATATTAGAAAAGAAAGGACATTTTAATGAAAATATTAATATCAGTGAAAATAATAAAAATATATCTTTAGAATTTGGAAAAAGTAATGAAAGTGTTCCAAAAAAAGTTGTTGCTAATGAATTTCCTAAAATCATATATGCTTCGAGAACACATAGTCAA…	MIEQKIHKRYKIVKKDDVNHRYTINDIEVYFPYELYDCQYNYMLSVLSALKKRENAILESPTGTGKTLCLLCASISYVVDILEKKGHFNENINISENNKNISLEFGKSNESVPKKVVANEFPKIIYASRTHSQLKQVIKELKNVYFIKNNEKYKLLTTILGSRDQLCVHNINYNYKGTLLNNMCKRTRKNGECIYHNGLKYLYKLKHLFTTPMDVETLSEIGKGNSVGQNIHFCPFYATREIQNECHIILLPYNYLFEESTRKILKLNLENSIIIIDEGHNIENVAEEAVSFKLKDTDLNLFLEALKATLTILEKVNEIDKEIKDKINIDELFILNRSINALITWLHNLQLEKNEKKKIKEKHKIYQGKQIFEIFEKNSINITKDNFDNFNNLLTAMIE…	1160	0	null	no	GO_0005524, GO_0004003, GO_0008026, GO_0003677, GO_0016818, GO_0003676	GO_0003678	GO_0005524,GO_0004003,GO_0008026,GO_0003677,GO_0016818,GO_0003676,GO_0003678	0	0	0	0	0	0	0	0	0	0	0	0	0	0	0	0	0	0	0	0	0	0	0	0	0	0	0	0	0	0	0	0	0	0	0	0	0
293	PF3D7_0216000	DEAD/DEAH box helicase, putative	null	ATGATAAACAGTGATAACAAATGTATGAACGATAATAAGGAGAGTATTCCGAAAGAATACAAAACACAGGATATGATAGAAGGAGAAAAAGAAAGAAAGAACAAGATAATAAAAGAATATATAAAAAATATGAATGAAGAAGATTTCTTATATCTAAGTGAACATTTAAAAATAAGAATAGATAATGAAATATTTATGTCTCAAGAATTAAATGACTATATTAATAAACATATTGATATAATATGTGAATTACATTTTAAAAACTTTAAACGTCCTAAAACTCATATGAAAAAGGTCTTTATCGATCTTACCTTGAAACTTAAATATTTAAGACATTTGGAATATTTGAAAAGAAAAAAAAAAAAAGATAAAGAAAATAAAAGTAAAAGTAAAAAGGAA…	MINSDNKCMNDNKESIPKEYKTQDMIEGEKERKNKIIKEYIKNMNEEDFLYLSEHLKIRIDNEIFMSQELNDYINKHIDIICELHFKNFKRPKTHMKKVFIDLTLKLKYLRHLEYLKRKKKKDKENKSKSKKEKNNKNEKDDEMENKKEKNNKNEKDDEMENKKEKNNKNEKDDEMENKKEKNNKNEKDDEMENKKEKNNKNEKDDEMENKKEKNNKNEKDDEMENKKEKNNKNEKDDEIKENMDKVMENQLNQSNILYNKDRIRKNRNNLKDEKDVSNKNILDDNKDIVEFKLQDISSGYSETSCKSTNSIENGNSSSTSSCDDDSSFLFSCSSDCDEETSDEEILSTIHFDEKEMSTLKSLEKAKNVYFAYINKKFKKYNILDHFNMNFLERLNYYF…	1997	0	null	no	GO_0005524, GO_0003677	GO_0003678, GO_0016252	GO_0005524,GO_0003677,GO_0003678,GO_0016252	0	0	0	0	0	0	0	0	0	0	0	0	0	0	0	0	0	0	0	0	0	0	0	0	0	0	0	0	0	0	0	0	0	0	0	0	0
3166	PF3D7_1130700	structural maintenance of chromosomes protein 1, putative	SMC1	ATGGAGAGAAGGGGAAAAAATCAAACCAACGATGCTACTCTTAACGAATTTGATGATGATACCTCTGAATTTAGTATGAACATATTGAATCATCCTAACACGGATGTATTAGTAAGTCCCATTAAAGTTGTGGACCATGATTTTAATAATTTTATTAATAATAAATGTTTAGATTATTCAATTGATTCTTCTTTAGATATTACTACTAGTAATTTAACAACTCTCAAAAGTAAAGGGCAACAAAAAATAAATAAGTCGAATCACGCAGTTCAAAATGGAAATAATAATATGGATGAGAAAATAAAGAAAAACACCATATTAGTAAATAAAGAGGAAAAGAATAAAAAAGGAGATGCAAATGTAAATGTTGCTCATGAAAATGTCGCCCTTCAAAATGTC…	MERRGKNQTNDATLNEFDDDTSEFSMNILNHPNTDVLVSPIKVVDHDFNNFINNKCLDYSIDSSLDITTSNLTTLKSKGQQKINKSNHAVQNGNNNMDEKIKKNTILVNKEEKNKKGDANVNVAHENVALQNVALQNAALQNVEEENNLTRNKGNFKYAENFSGSNNNHYGSRVIQKSKHTQDYRKDGSYEQEEIEDNEYINISQSKAQHEDMNNVQSIIPHDDSIITPSNHNNLKCDVLIKDKDQSYNRNMKKYSEFNLKQQDLSISQDYLNNSILSSVGLYKENDLCFIKYIIVSNFKSYEDENIIGPFSKFTSIIGPNGSGKSNIMDCICFALGINNKYLRVKNLRNLIYHKENEKAEDINKRICYVKIILECNKENVEIKRTLNYKGVSNFYIND…	1818	0	null	no	GO_0005524, GO_0005515	GO_0003680, GO_0016887, GO_0003690	GO_0005524,GO_0005515,GO_0003680,GO_0016887,GO_0003690	0	0	0	0	0	0	0	0	0	0	0	0	0	0	0	0	0	0	0	0	0	0	0	0	0	0	0	0	0	0	0	0	0	0	0	0	0
628	PF3D7_0403700	pre-mRNA-splicing factor CLF1, putative	CLF1	ATGAATTTTAATAGTAAGAAGTTACAGGTTAAGAATAAGAACGCCGCAGAGGTGCAGATTACGGCGGAGCAACTTATTAACGAGGCGTTAGAACTAGAAGAGGTTGAACATAAAGTAAATTACAATTTGATAGATGAAGAAGAGTTGAATGAATATAGAATAAATAAAAGAAAAGAATATGAGGATAAGATACGTAAAAGAAGATATATGATAAGTACGTACATAAAGTATGGATTATGGGAAATAAAACAGAAGGATATTGAAAGATGTCGTTCCATTTTTGAGAGGGCTTTAAATATTGATTATACAAATAAAAATTTATGGTTAAAATATATAGAAGTTGAATTGATTAATAAGAATATAAATAGTGCTAGGAATTTATTAGAAAGGGTTGTTTTA…	MNFNSKKLQVKNKNAAEVQITAEQLINEALELEEVEHKVNYNLIDEEELNEYRINKRKEYEDKIRKRRYMISTYIKYGLWEIKQKDIERCRSIFERALNIDYTNKNLWLKYIEVELINKNINSARNLLERVVLLLPLENIFWKKYAHLEEILNNYVNARNIYERWIKFKIDESSFLCYIYFEERCNEINKCREIFERLIVSIPKLECFYKFIKFEKKYKNIVRARAAYEKCIELLPSCYIDENFYIHFCNFEEEQNEYERCKKIYIEALKILPKNKSELLYKNFLQFQKKYANKDELHESLLIKERIFYEDELKKNKNDYDIWFNYIKLEESNINNINKEKCIIRIRDLYERAISIIPIISSKKFWKRYIYLWINYSIFEELYAQNIQRARDVYNNIIK…	780	0	null	no	GO_0005515	GO_0003682	GO_0005515,GO_0003682	0	0	0	0	0	0	0	0	0	0	0	0	0	0	0	0	0	0	0	0	0	0	0	0	0	0	0	0	0	0	0	0	0	0	0	0	0
2803	PF3D7_1033700	bromodomain protein 1	BDP1	ATGATGCTTGAAGATTTTAATACATTGCCTTTAATAAAATCTATAAGAGAAGATAGTTTAGACGATGTATTAAAGTTTTTAGAAAATAATTATAAAGATTATGAAGTAAATGAAAATGGAGAAGCAAAAAAAACAATTGAATTAGTTGATAAACAAACACAAGCTACTCCTTTATTTTATGTAACGGCAAGAAAAAGTGATGAAGAATCAGTTGAAATATCAAAACTAATTATAGAAAAGTATGCAATATGTAATCCGATATCAAAAGATTTAATGAAACAAACTTGTTTATTTTATGCAGCTAGAGAAGGTCATCTTAATTTGTGTAATTATTTAATAGAAAAGGGTTGTAACCCGAATGATCAAGATAATTTTGGACAAACCTGTTTATTTTATGCA…	MMLEDFNTLPLIKSIREDSLDDVLKFLENNYKDYEVNENGEAKKTIELVDKQTQATPLFYVTARKSDEESVEISKLIIEKYAICNPISKDLMKQTCLFYAAREGHLNLCNYLIEKGCNPNDQDNFGQTCLFYASREGKTDCVLTLIKKGANPNLLDLNKQTCLFYACRDGRYDTVKCLLENGVNPSIKDAQRRTALTFAKGNGHNNIINLLKNVGTLSRSSIDSNAQLGNITMLRRNSSSYIAASSPNESNLNNLTVQAENVSNVNLKTEDNQLRKKYKLQYKPLSDEDPLLWVDAPLIKIKEFERKFPELALWPRNVSQSNVEVNNANDAFNKQWYLLANQLILSLSKYEGGHIFEKLVDAKKQNCPDYYDVIKNPMSFSCIKTKLKKGQYAYPSEFV…	488	0	null	no	GO_0005515	GO_0003682, GO_0001047, GO_0042393, GO_0005515	GO_0005515,GO_0003682,GO_0001047,GO_0042393,GO_0005515	0	0	0	0	0	0	0	0	0	0	0	0	0	0	0	0	0	0	0	0	0	0	0	0	0	0	0	0	0	0	0	0	0	0	0	0	0
4177	PF3D7_1329300	chromatin assembly factor 1 subunit, putative	null	ATGCTAGATATTCTTCAGGAGAAAAATAAGATATACGATTTCAAGGAATCGTATGAATTAAACACACCAATAGAAAATGAAGTAACAGAAAATAATTATGTAGATATACAAAATGAAAGACATATAATATGGAGAAAGAATACGCCTTTTTTATATAGTTCCTTATTAAAGCATAAATTGGATTGGCCTTCATTAACGGTAGAATTTTTAGGAGGTGATAATTCTTTTAAATCAAAATTAAATTATTTTACTAATAAGGTATTATTAGGAACACATACATCAAATCAAGATTTGGAATATGTATATATAGGTGAAATAAAATGTCCTATATTTTCCATTAAAGAAGATGTATTACAATATGAAAATTATAGTGGTTTTATAAGTAATAAAAAAAAAAAA…	MLDILQEKNKIYDFKESYELNTPIENEVTENNYVDIQNERHIIWRKNTPFLYSSLLKHKLDWPSLTVEFLGGDNSFKSKLNYFTNKVLLGTHTSNQDLEYVYIGEIKCPIFSIKEDVLQYENYSGFISNKKKKKGHPLPSFEVKAKLLHPGEVIRATNLPSNSFFIVTQTSNGNALLFDYTKHPSFPSDMSTCYPQMILKGHTNEGSGLCWNVNRVYDSYKNPNIFDGYMEKVLYTGKEDDSIKDIYSVKDMYSLKDTFSLKDTNSVEDIASSKDIQSVRGAYSIKELEAHNDLDIVNDLDTEESNDSISNSNTFGTEVNTTNLLLASCSVDGSICLWDINKGTKSNDVPRTYGLNKSGKTADYNIKIYENTPTLSPLCTWYNKNTKTAFNDIFFHPKF…	582	0	null	no	GO_0005515	GO_0003682, GO_0042393, GO_0051082	GO_0005515,GO_0003682,GO_0042393,GO_0051082	0	0	0	0	0	0	0	0	0	0	0	0	0	0	0	0	0	0	0	0	0	0	0	0	0	0	0	0	0	0	0	0	0	0	0	0	0
3593	PF3D7_1224500	histone chaperone ASF1, putative	ASF1	ATGTCAGAAGTAAATGTAACAAAAGTTATTGTAAATAATCCTATATGTGATATATTAGACCCATTTGTTTTTACTATTGAATTTGAAGCTTTGAATAAATTAGAAGCTGATTTAGAATGGAAAATTTTCTACATTTCGGCTGTAAATAATGAAGGAGAAAGTAATCAAGATATTGAATTAGATAACATTTTCCTAGGACCAATTGAGAGAGGAGTTATGATGTTTGATTATGCTGTAAATCCCCCTGACTATAAAAATATGGATATTGATAGCGTTTTAGGACTTCAAGCTATTTTGATATCGGCAAATTACAAAGAAAAGGAATTCATTAGAATTGCATATTACATGAATTCATTTTACAAAGATATGGAATTAAGAGAGAATCCTCCTGTAGTTCCA…	MSEVNVTKVIVNNPICDILDPFVFTIEFEALNKLEADLEWKIFYISAVNNEGESNQDIELDNIFLGPIERGVMMFDYAVNPPDYKNMDIDSVLGLQAILISANYKEKEFIRIAYYMNSFYKDMELRENPPVVPQYDKICRHIFVENPRIVKFSIGWDSEEKDEFKEFDKEIEKIELLNCTQIKDENENNSNITNQSTQGNFVLSNNDPNNNNNNNNNPSITSSMIFNSNIVNNNFNQNNFLKNNELSSDLDKCEIFNANINGISRITIDNKNS	273	0	null	no	GO_0042393	GO_0003682, GO_0051082	GO_0042393,GO_0003682,GO_0051082	0	0	0	0	0	0	0	0	0	0	0	0	0	0	0	0	0	0	0	0	0	0	0	0	0	0	0	0	0	0	0	0	0	0	0	0	0
2577	PF3D7_1011700	DNA repair protein RAD23, putative	RAD23	ATGAAAATAAAAGTAAGAACACTACAAAACAACGAAGAGGAAATTAATGTAGACCCTGATGATAGTATACTTGATTTAAAAAAAAAAGTGGAAGTAGTTTTAGCAGACATGCCAAGTGATAAACAGAAATTAATATTCAGCGGGAAAATATTAAAAGATGAAGACAAAGCAACAGATATATTAAAAGATAATGATACAGTTATTGTAATGGTTACTAGAAGAATTATTAATAAAAATAATCAAAAGGAAGATATTAATAAAGAATCATTAAGTAAGATAGAAAATAATAATAATAATAATAATAACAAATCTGATGATAATATTAATGTAACTACATCAAATACAGAAGAACAAAAGGAGAATAAGGAAAATAAAAATGATAATACAAATGATAATATA…	MKIKVRTLQNNEEEINVDPDDSILDLKKKVEVVLADMPSDKQKLIFSGKILKDEDKATDILKDNDTVIVMVTRRIINKNNQKEDINKESLSKIENNNNNNNNKSDDNINVTTSNTEEQKENKENKNDNTNDNIYNSFNNAESMLLTGDKLKESIDNICAMGFEKEQVKKAMILAYNNPNRAIDYLTNGFPNENVNVNVNENINNESNFSNLLNSENNPLLEENSSHPLSSNEETFRNSTFFNAIRDMALSNPQRLPELLQMIGRTDPSFLEYIRQNQTEFLAALQNYGNNINDHEEHSDDNLDNADDENAIQNDSFLQDVGQQVLSDPNNENINIPITPLNENEMESIKKLESLGFPKHVALEAFIACDKNEEMAANYLFENMNDFTSE	389	0	null	no	GO_0003684, GO_0005515	GO_0003684	GO_0003684,GO_0005515,GO_0003684	0	0	0	0	0	0	0	0	0	0	0	0	0	0	0	0	0	0	0	0	0	0	0	0	0	0	0	0	0	0	0	0	0	0	0	0	0
1792	PF3D7_0803400	DNA repair and recombination protein RAD54, putative	RAD54	ATGAGAAAATATAATGGAAACGTCAAAAGAAGCAGAGACGACGAATATGAAGAGAATGAAAATGTGAATGGAGAGCGGACTAGCATAACATTAGTCCGAGCAACTTTATTACCAATATTAAGTATAGGTAAGAATGAAAAGACAACATTATTTCATCCTTTTAAAAATCCCTTACCTGGTTTTGTAAGTGATAAGACGTTGTATTTGAAAAAGACATTAGGTGTTAAGGTGAGAAGAACAGGTTGGATAAATTTGATGAAGAATTCTATTCCTAGAAGATCTGATGAAACAGAAGAACAAGAAAAGATCGAAGAAGTTATAAAAAAGCATGAACCGTTAATTTTATACAAAGACGAAAATGATAAGATTGAGGTTGATCCTATATTAGCTCAATATTTA…	MRKYNGNVKRSRDDEYEENENVNGERTSITLVRATLLPILSIGKNEKTTLFHPFKNPLPGFVSDKTLYLKKTLGVKVRRTGWINLMKNSIPRRSDETEEQEKIEEVIKKHEPLILYKDENDKIEVDPILAQYLREHQREGVQFVFECLMNIKDDKISGCILADDMGLGKTLQSITVLYTLLKQGFHKKCAVRRCLILCPASLINNWNDEISKWIPNRCNVTCVNDNAKEKIVSKLEGFKYDIQSTVLICSYECFRINNEFLDKSSIDMIICDEAHRLKNDKTKTYTSIYNLTAKKRLLLSGTPIQNDLGEFYALISLCNPDLFDDINLFRKKFANPILIGRDKDATEKEQEIASERLTELSNITNKFILRRTNNLLSKVLPVKYLINIFIKLNPIQEAL…	1239	0	null	no	GO_0005524, GO_0003677	GO_0003684	GO_0005524,GO_0003677,GO_0003684	0	0	0	0	0	0	0	0	0	0	0	0	0	0	0	0	0	0	0	0	0	0	0	0	0	0	0	0	0	0	0	0	0	0	0	0	0
167	PF3D7_0203300	ERCC1 nucleotide excision repair protein, putative	ERCC1	ATGGTAAGTGATAAGGAAGATCAATGTAACAAAATTAATAACAATGATAATGTTACTAGTCTCGAAAGCATTAATGAAGAAAAAAAAAATAATACAAATGAGGGGGGAGAAAGCTTCTTTGACAATAATGCTGAGCAATATTTAATTATATCATTAAGACAAAAACTGAATCCAGTTATAAAAAAAATAAAAAGAGTTCGTTATAAATTTAATAATATTATACCAGATTTTTTAGTAGGGAAAAATAATGCATGTCTTTTTATATCCATGAAATATCATCGTTTACGCTCAAATTATTTAAAAGCTAGAATAGAAACTTTATCAAATAAATATAATAACAGAATATTATTATGTCTAGTGGATATGGAAAATATTGAAAATTCTTTAGGAGAAATAAAT…	MVSDKEDQCNKINNNDNVTSLESINEEKKNNTNEGGESFFDNNAEQYLIISLRQKLNPVIKKIKRVRYKFNNIIPDFLVGKNNACLFISMKYHRLRSNYLKARIETLSNKYNNRILLCLVDMENIENSLGEINQLSFSFNMTLILCWSNEECARVIEDFRIYEKKISYIIKKKISSSNQEEKIHELLKKIRCIHTTDCITLTTKFKNFKNIIQAKKEDLISCSGLGIKKIQALMATFNDPFF	242	0	null	no	GO_0003684, GO_0004519	GO_0003684, GO_0004520	GO_0003684,GO_0004519,GO_0003684,GO_0004520	0	0	0	0	0	0	0	0	0	0	0	0	0	0	0	0	0	0	0	0	0	0	0	0	0	0	0	0	0	0	0	0	0	0	0	0	0
4504	PF3D7_1363200	bifunctional polynucleotide phosphatase/kinase	PNKP	ATGGTGAAAAGGAATTTACCTCAATTTGAATTACCCAATAAGAATTGGAACATATTTGAAGATAGCTTGCTGTACCGCATTGTGAAAGATAAAGAAGATAAAATTTACAAAAAAATATTTTCCTTCGATTTAGACAACACCTTAATTTTGTCTCGAGGATTTTTTAAGCCTGCACAGAATGAAAAAGACTATATTTTTTATTCAGATATCATAGAATTTTTGAAAAAGAAGCATGAAGAGAATTATAAAATTATGATTTTTTCTAATCAAAAAGGTGTTAGTTCAGGGAAATTAAGTTTATCAAATCTTATAAATAGGGTAGATGATATAATAGAAAAAATTGGATTGCCATTAGAATGTTATTTAGCTTTAAAAAATGACAAATATAGAAAACCAAGA…	MVKRNLPQFELPNKNWNIFEDSLLYRIVKDKEDKIYKKIFSFDLDNTLILSRGFFKPAQNEKDYIFYSDIIEFLKKKHEENYKIMIFSNQKGVSSGKLSLSNLINRVDDIIEKIGLPLECYLALKNDKYRKPRIGMYLFATQNYKQNLDEVIYVGDNANRIYDEKFKQEFINHLKYIYSKNNVNININDIYKRLKKDYTDTDLKFALNINAKFYTPEDLFLNIKNHISTDFLFNPKYFNKELNEQENINKKNNHFYEICMKDYHSQNENINNKKNNTNNNIIPNNQYTTNEKYIPPNDQQKLIILIGPPGCGKTFLCTNYFSTYIRINMEEYKTISKCIQVLKEKLLQRKNVIIDNVNSLIKNRLLYINEAKKINQNIEIRLIYFNYSKELIIHLNTFK…	462	0	null	no	GO_0005524	GO_0003684, GO_0046403	GO_0005524,GO_0003684,GO_0046403	0	0	0	0	0	0	0	0	0	0	0	0	0	0	0	0	0	0	0	0	0	0	0	0	0	0	0	0	0	0	0	0	0	0	0	0	0
3387	PF3D7_1203000	origin recognition complex subunit 1	ORC1	ATGACTCCTAAGAAAAAAATATTTCAAAATTTTCAAGCTAACGATAATGAAATATTAAGTCCAACAAAAAAAGGGATAAAATTAAATGTTAGTAAATTAAATATTTTAAATTTTGAAAACACAATAATAACAAAAGAAAAAACTAATTATGAATACAAGGCATCATTAAATAAAGAAATAGATGAGGTGTTAAATAATAATAATATAATAAATACACATAATAATAAAAAAAATAATTTAAATTTATATGATTATAATAATATAAAAAATAGTACACACGAATTTTATATTGATTTAAACGAACAAAATAAACAAACCATTAAGTATAATGATAACAAGTTTACTCCTATAAATAAAAAAGAAAAATATAATCTTGATGAAACCTCTTCTTCATCCATA…	MTPKKKIFQNFQANDNEILSPTKKGIKLNVSKLNILNFENTIITKEKTNYEYKASLNKEIDEVLNNNNIINTHNNKKNNLNLYDYNNIKNSTHEFYIDLNEQNKQTIKYNDNKFTPINKKEKYNLDETSSSSISSSLTNISSSLTNISSSLTNISSSLSNSLDEKKKKKKIKKNNSTIINILNNNNNNSNIHHNNKHNIYNKYNISKKPQNKEIHTLPSNHQIKKKSNNTYNTCQQKMKKNISKKNTHSIKNNQNDKNKEKNKEKDKNIKKDRDKDIQTKRTSHQSQDQNNHFERRILRSYTRNNDNVKNNLKNNINNNNTLKRSSQSVRIDSDLSSAHQNKRIKYDEKNIIHRNNNNNNNNNNKTTSNNHNKNNKINNNNPSENYKKQTDTKHTNNTQ…	1189	0	null	no	GO_0005524	GO_0003688, GO_0042162	GO_0005524,GO_0003688,GO_0042162	0	0	0	0	0	0	0	0	0	0	0	0	0	0	0	0	0	0	0	0	0	0	0	0	0	0	0	0	0	0	0	0	0	0	0	0	0
3758	PF3D7_1241700	replication factor C subunit 4, putative	RFC4	ATGGAGGAAGATTCATTCAAAAATAGATTACTCAAGAGAAATATCGATATATGGATAGAAAAGTACCGACCAGAATTTTTAGATGAAGTAGTAGGAAATCCTTTTGTAATAAATACATTGAAGAGTATTATTACTTCAGGAAATATGCCTAATTTACTTTTAGCTGGTGCTCCTGGTACGGGTAAAACGACAAGCATATTATGTCTGGCAAGCGAAATGCTCGGAAATCAAGCAAAAAAAGCTGTTCTGGAATTAAACGCATCAGATGATAGAGGAATTAATGTGATAAGAGATAGAATAAAAAGTTTTGCAAAAGAAATAATAAGTTTACCACCAGGAAAACATAAAATTATTATATTAGATGAAGTAGATTCTATGACAACAGCAGCTCAACAATCT…	MEEDSFKNRLLKRNIDIWIEKYRPEFLDEVVGNPFVINTLKSIITSGNMPNLLLAGAPGTGKTTSILCLASEMLGNQAKKAVLELNASDDRGINVIRDRIKSFAKEIISLPPGKHKIIILDEVDSMTTAAQQSLRRIMELYSDTTRFALACNQSEKIIDALQSRCAIIRYFKLSDDQVLKRILKICDLENIKYTDDGLDALTFIADGDLRKAVNCLQSTYAGLEVINKENVLHICDIPSPERIENLLKHCVNSEWKKAHDIAYSMIKEGHTPYDISLTSSNVLRRFNIGSEVIQIEFLKIGAMACNTMATGLTSVIQLDKLLADWCMAAKILRSKA	336	0	null	no	GO_0005524, GO_0003677	GO_0003689	GO_0005524,GO_0003677,GO_0003689	0	0	0	0	0	0	0	0	0	0	0	0	0	0	0	0	0	0	0	0	0	0	0	0	0	0	0	0	0	0	0	0	0	0	0	0	0
87	PF3D7_0109600	cold-shock protein, putative	null	ATGCTTAGAAGAAAAATTCACATTCATTTTAATAGTTATAAAAAACATTTTTTTTCTCAATTAATAAATAAAGAAAAACATGATAAAATAACAGGAAATGTTATCATGTTCGATAAGAGGAAAGGTTATGGTTTTATAAAACCGAACGACGGAGGGCCAGACATTTTCGTACATTATACTGACATTTGTCAAAGTAGAACTTTTGAAGTTACGAATGAAGAGAAAAAAAAATTAGCATGGAATGCAAATATGGATATAACGCAAAAGAAGGAGGAATATAATTTTGAATATGATAATAATAATAATAATAATAATAATAAACATAATAAAAAAAAAGAAGAAATTAAAAAAGAATTTAAATATTTGGTACCAGGAGAAAGAGTAAAATTTTCCGTAATA…	MLRRKIHIHFNSYKKHFFSQLINKEKHDKITGNVIMFDKRKGYGFIKPNDGGPDIFVHYTDICQSRTFEVTNEEKKKLAWNANMDITQKKEEYNFEYDNNNNNNNNKHNKKKEEIKKEFKYLVPGERVKFSVIYDEKSNSSKAINVDYID	150	0	null	no	GO_0003677, GO_0003676	GO_0003690	GO_0003677,GO_0003676,GO_0003690	0	0	0	0	0	0	0	0	0	0	0	0	0	0	0	0	0	0	0	0	0	0	0	0	0	0	0	0	0	0	0	0	0	0	0	0	0
2578	PF3D7_1011800	PRE-binding protein	PREBP	ATGGGAAGGAAAGCTACCACTTCATCCATATTAGAAGAAAAACCTGTAAACAAAAATAGCGGAGTTGTAAATAATATGAAGGATGCCCTTATGAATGACAAAAAACAAGGAGGATCAAAATTGAATGAAAAAAAAGGAAGTAAAGTGACGGAGTTAACAAGTAATGCTCATATGAATGGAAGTATACAAAAGAAGAAGGAAGAAAATGAATTAGAAAATAATAAGAAATTGAATCATAAAAATAATCTGGAAGAAAATTGTGTTATTAAAAGTAAAGAGGTTGTTAAAGGAGGAGACCAAAAAAATGAGGGACAAGCTAAGAAAAAGAATAATAATAATAATAATAATAATAAGAAGAAAGGGACAAAAGAAAATGACATGGATAAAATAAACCAATCT…	MGRKATTSSILEEKPVNKNSGVVNNMKDALMNDKKQGGSKLNEKKGSKVTELTSNAHMNGSIQKKKEENELENNKKLNHKNNLEENCVIKSKEVVKGGDQKNEGQAKKKNNNNNNNNKKKGTKENDMDKINQSGNTNDDKKKANKNNTTEGNEKNKGSNNKKYVGNKDENMKVELMDVTKNNNSTNTGINNSSNNNNNNKKKNNNNNNNNNNNNNKNKNNNNNNNIISNNNNNNNNNSDVKKDWKKEIKLKEDERKKSENDLKKKFVKLNKADNYKNINDKKEAEIKKKIEIENFISTINSTISRFNGQTTRPINMKLSSADMENKCKDAKSKKKKINPKNLEEIEEANTYINYLEEQLSITKNYENFKNFQNRLISLRKICEEKLKENLKSMNETKIQ…	1139	0	null	no	GO_0003723	GO_0003690, GO_0003700	GO_0003723,GO_0003690,GO_0003700	0	0	0	0	0	0	0	0	0	0	0	0	0	0	0	0	0	0	0	0	0	0	0	0	0	0	0	0	0	0	0	0	0	0	0	0	0
4464	PF3D7_1359200	high mobility group protein B4, putative	HMGB4	ATGGACAGAAAGAAGCCCAAGGCACCACCATCTTCATATTTAATTTTCTGTAATTACGAGAGGGAAAACGCAAAGAATACTTTATTACAAAAATGTGACAAGGAAACAATTCGAATAACTGATATACAAAAAGAATTAAGTAACAAATGGAAAAATCTTCCAGAAGATGAGAGAAAGAAATATGAGGAACAAGCACAAATATTGAAATCAAAATATAACGAAGAATTATTAGAATGGAAAAATCATTCAAATGAATATATATCAGGAGATTTGGTTATAAACAATACAGCTAAATTTCCTGTGATGAAAATACAAAAAATTATGCAATTAAATGGAAACGTAAAAAAAGTTAATAATGAAGCTATTAATATATTTCAAAAAGCAGTGATGATGTTTTTA…	MDRKKPKAPPSSYLIFCNYERENAKNTLLQKCDKETIRITDIQKELSNKWKNLPEDERKKYEEQAQILKSKYNEELLEWKNHSNEYISGDLVINNTAKFPVMKIQKIMQLNGNVKKVNNEAINIFQKAVMMFLIELVNKTLEFKDEKNTARNITSFDILSCIQREGIKYKFLEDCIYLLKEERGQTFFDEEDVQEETLFDLCEEDKKEYNYDVEEKKISKLKKKVQGSNKIKDKAGINKNIYADITTFFKKI	252	0	null	no	GO_0046982, GO_0043565	GO_0003697	GO_0046982,GO_0043565,GO_0003697	0	0	0	0	0	0	0	0	0	0	0	0	0	0	0	0	0	0	0	0	0	0	0	0	0	0	0	0	0	0	0	0	0	0	0	0	0
4042	PF3D7_1315800	transcription factor MYB1	MYB1	ATGTTTAATAATAATAACGAATATGAGTGTTTATGTATTTTAGAAGAAAAGTTAGTGAAGCATTTAGATGTTATCGACAAATTGATAGAAAACATTTATGATAATATAAATAATTTGAATGAATATATAAATAAAAAATATAATGAAATAAAAATATTAGCTAGTAAAAAACCAACTAGAATAAATTGGATGAAATGTGATGATAAAACACATATGTCTTTATTTTTTGATAAAAAAATAGGATTCATACCATCAAATGAAGATGCTTTAAAAATATTAGATTCACAATTAATGTTATCAAATTATAGAAAAAAATATGAATATAAAAAGAATTCATGGACCAAAAAAGATATAGATAAATTATTTGAAACTGTTGATATTACATTAAAGAAGTATGCA…	MFNNNNEYECLCILEEKLVKHLDVIDKLIENIYDNINNLNEYINKKYNEIKILASKKPTRINWMKCDDKTHMSLFFDKKIGFIPSNEDALKILDSQLMLSNYRKKYEYKKNSWTKKDIDKLFETVDITLKKYACYYLIDQNLSCDEKINKKKMIEQSEPKQIFSQIKLFFDKYNKENTHNKGNEDNVNKNINDNISKNNITHTQNCYEPIEKEQDNSNNIFSYTKNDKNIEHNFLYFSETFWNEVSEKLSNNQNAKECQKMWLYYGCFEDDKQKKWTKDEVDKLLCLSKKYEQRNWKCIARELNTNRSPLSCFEQYIKINKLYENKEKVKLERIAFNVLEDIQLQILVSIIGDKNWAEVKKHMESLNSNTSRIKKRKTNLNFFEKEKQKKFLNDEISYK…	414	0	null	no	GO_0003677, GO_0003682	GO_0003700	GO_0003677,GO_0003682,GO_0003700	0	0	0	0	0	0	0	0	0	0	0	0	0	0	0	0	0	0	0	0	0	0	0	0	0	0	0	0	0	0	0	0	0	0	0	0	0
198	PF3D7_0206600	DNA-directed RNA polymerase III subunit RPC10, putative	null	ATGGCCTTTTTTTGCCCCAATTGTCATAACATTGTTTTAGTACATATAGAAAAGGGTGTTTATTTTTATTGTAAATCATGTAATTATAAGTATAAAATAAAAAATAAAATATATAATAAATTCGATTGTCAACAATTTAACAAGACTATTCCTTTGGATGCTGTTGATATAAATAATAAAAATATGTCTAAGACTCAAGCTGTATGTCCAAAATGTACAAACGATGAAGCTTATTTTTATACTTTACAAATAAGATCAGCAGATGAACCTAGTACCATTTTTTATATTTGTGTAAAATGTAACTATCACTGGAAAGAATAA	MAFFCPNCHNIVLVHIEKGVYFYCKSCNYKYKIKNKIYNKFDCQQFNKTIPLDAVDINNKNMSKTQAVCPKCTNDEAYFYTLQIRSADEPSTIFYICVKCNYHWKE	106	0	null	no	GO_0003899, GO_0003676, GO_0008270	GO_0003700	GO_0003899,GO_0003676,GO_0008270,GO_0003700	0	0	0	0	0	0	0	0	0	0	0	0	0	0	0	0	0	0	0	0	0	0	0	0	0	0	0	0	0	0	0	0	0	0	0	0	0
99	PF3D7_0110800	transcription initiation factor TFIIB, putative	null	ATGTCATCCATTTCTCCAAATAAAAAGTTTGCTTTAACCTCTGCGAGTGATAAGCCCATCACTTTAATTAGAACCAATGTAAGTAATGAGAATAATAATGTGAGGAGAAAGATGTTAAGAAACTTTAGGAATAGTAGAAATACGACATGCCCAGATTGTAAAGAAAAAGGAATAATTATTTGTGATACGAGTGAAGGTACTCAAATATGTAATGGATGTGGTATGGTCGTTGAAAGTAAGATTTTGTCAGAAGAACAAGAATGGAGAAATTTTCAAAATGATGGTCAGTCAAAAAATACTGATAGAAATAGAGTAGGTGAAGTTAGTGATATATGGCTAGAAAATAATTTAACTAGTACTACATTTATTAAATCTAGTAAAAAATTACAACATTTAAAT…	MSSISPNKKFALTSASDKPITLIRTNVSNENNNVRRKMLRNFRNSRNTTCPDCKEKGIIICDTSEGTQICNGCGMVVESKILSEEQEWRNFQNDGQSKNTDRNRVGEVSDIWLENNLTSTTFIKSSKKLQHLNMMTQINKNDQTLISAFNILKLICDTFFLRSNVIERAKEITKELQDMEQLKNRINNLNMLAVVYLACREAGHIKSIKELITFDRSYKEKDLGKTINKLKKVLPSRAFVYNENISHLIYSLSNRLQLSIDLIEAIEYVVKKASTLITTSHRLNSLCGGSIHLIVELNTNEEKNMKLPNLSQIATVCGVTTNTLKTTFKELLNAAEYIIPKYYLSEDNPKLSMLKQKYLSEDKRKKN	367	0	null	no	GO_0017025	GO_0003702	GO_0017025,GO_0003702	0	0	0	0	0	0	0	0	0	0	0	0	0	0	0	0	0	0	0	0	0	0	0	0	0	0	0	0	0	0	0	0	0	0	0	0	0
3143	PF3D7_1128200	multiprotein-bridging factor 1, putative	MBF1	ATGGATCACCAAGATCTGAAACCTGTTATATGGCACAAAACCGAAAAGAAGACTAAGCCAAAAGATATTCATGAAGCGAGAAAGTTAGGTATTGACGTAGAAGTTGAAAAGAAATATTTTGGTGGAAAAAATAAATCAAGCAAAGGAAATTTAATAATAGAAAATAAAGCAAAAATTGAACAAGAAACTGAGAATTTTAAAATTGATAGAGTTACACCAGCTTTTTCTAGAGCTTTACAACAAGCAAGAATTAGTAAAAAACTAACACAAGCACAATTAGCTAGACTTGTTAATGAAAGTGAATCTGTTATTAAGGAATACGAAAATGGAAAAGCAATACCAAATAATGTTATTATTCAGAAACTTAATAAAGTCTTGGGGGTCAATTTACCTTCACCC…	MDHQDLKPVIWHKTEKKTKPKDIHEARKLGIDVEVEKKYFGGKNKSSKGNLIIENKAKIEQETENFKIDRVTPAFSRALQQARISKKLTQAQLARLVNESESVIKEYENGKAIPNNVIIQKLNKVLGVNLPSPKKK	136	0	null	no	GO_0003677, GO_0043565	GO_0003713	GO_0003677,GO_0043565,GO_0003713	0	0	0	0	0	0	0	0	0	0	0	0	0	0	0	0	0	0	0	0	0	0	0	0	0	0	0	0	0	0	0	0	0	0	0	0	0
547	PF3D7_0319500	RNA-binding protein, putative	null	ATGGGATTATTTGATAAAATAAGGAATATTGAAAAATTAAATGAAGCAGAATTAAAAAATATTGGAAATAATGATAGTTCATGGCACGATCAATATAGAGATTCGAGTTATATTTACATAGGAAACTTAGATAACAGATTAACCGAAGGAGATATTGTTATCGTTTTTTCTCAGTATGGGGAACCAATAGATGTTAATTTAGTGCGTGATAACGAAACAGGAAAGTCAAAGGGATATTGTTTTTTATCTTATGCTGACCAGAGAAGTACCATTTTGGCTGTAGATAATTTCAATGGTTATAAACTTTTAGAAAGACCACTTGTAGTTGATCATATATTAAATTATAGGTTGCCCAAAAAATATTTGAAGGATGCGGATAAAAACGAATACAAACCAACC…	MGLFDKIRNIEKLNEAELKNIGNNDSSWHDQYRDSSYIYIGNLDNRLTEGDIVIVFSQYGEPIDVNLVRDNETGKSKGYCFLSYADQRSTILAVDNFNGYKLLERPLVVDHILNYRLPKKYLKDADKNEYKPTGAEGQGIGVYNVVESEIKLSKVFDKIKNKSNEEKKKKLLDEDELWALNFEKSIKKDIISPIGHDEKSRHNEGMKEEEEDEDDEDDDDEDDDDDDSVDIKYKRHKEKRKSLTTKKYDKKEKHKRKSDHRDKHRRRENHSRHREKEKDKKSHKRRHKHSYDKYSSRSRSYSTSSSTDR	309	0	null	no	GO_0003676	GO_0003723	GO_0003676,GO_0003723	0	0	0	0	0	0	0	0	0	0	0	0	0	0	0	0	0	0	0	0	0	0	0	0	0	0	0	0	0	0	0	0	0	0	0	0	0
999	PF3D7_0517300	serine/arginine-rich splicing factor 1	SR1	ATGGTTATACGTGAAAGTGTATCGAGAATATATGTTGGTAATTTGCCATCACATGTCTCTTCAAGAGATGTAGAAAATGAATTTCGTAAGTATGGTAATATATTAAAGTGTGATGTAAAAAAAACAGTATCAGGAGCTGCCTTTGCATTTATAGAATTTGAGGATGCACGAGATGCAGCAGATGCAATAAAAGAAAAAGATGGTTGTGATTTTGAAGGAAATAAATTAAGAGTAGAAGTACCTTTTAATGCTAGAGAAAATGGAAGATATAACGCAAGAGGTGGTGGAAGGGGTATGATGCATAGAGGTCCAAAATCACGAAGAGGAAGATATGTAGTTGAAGTTACAGGATTACCAATATCTGGTAGCTGGCAAGATTTAAAGGATCACTTGAGAGAA…	MVIRESVSRIYVGNLPSHVSSRDVENEFRKYGNILKCDVKKTVSGAAFAFIEFEDARDAADAIKEKDGCDFEGNKLRVEVPFNARENGRYNARGGGRGMMHRGPKSRRGRYVVEVTGLPISGSWQDLKDHLREAGECGHADVFKDGTGEVSFFNKDDMLEAIDKFNGSIFRSHEGEKSKISIRQKKTLWRRDDGGYGRYNSRHRSYSSRSYSRSGKRSYTRSRSRSYSSRSYSRSRSSSSRSRSRSMDRRRDTYDKKRSYSRSLSYQERRRNNRTISKSRSRSRTNSRSSSWSHKRRH	298	0	null	no	GO_0003676	GO_0003723	GO_0003676,GO_0003723	0	0	0	0	0	0	0	0	0	0	0	0	0	0	0	0	0	0	0	0	0	0	0	0	0	0	0	0	0	0	0	0	0	0	0	0	0
1202	PF3D7_0606100	RNA-binding protein, putative	null	ATGAGTTTAAATTTCAGTATAGCTAATGTAGTATATGTTAAGAATCTTTCAAGTGATATAACTGAAGAGAATATAAGAGAAAAATTTGGTTCTTGTGATGAAATAATAAGTATTACATTTAAGAATTTTCCAGGACTTAATCAGAAATATTGTCAAATTGAATTCAAGACATCAGAAGGTATAACAAATGCATCTAGGTTAAATGGAGAATCTCTTTTGAATGTCCCTATGGTTGTGAGTGTCATAGAACCCATAATAAATAATACTAATTTGAGTGAATTATCTACAACGGAATGTGATAAAAATGTAAATAGTTTGTTAGATGTTCGAAACAGTATAACGAATCAGGGTGTACAAACTCTCCTTTTACAAAAACAAGTAATATCTGAACAGAAAAAA…	MSLNFSIANVVYVKNLSSDITEENIREKFGSCDEIISITFKNFPGLNQKYCQIEFKTSEGITNASRLNGESLLNVPMVVSVIEPIINNTNLSELSTTECDKNVNSLLDVRNSITNQGVQTLLLQKQVISEQKKRLVDFQNSLNEKNNKFDVFSKIVYMENIPEKYGEEDIKAFFQNVGNTTSYKLQYNEQKKVHTAFVEFKNEEHAKAALNLSGTKVGLHEICIRDAYSLINDKDILKNNFSFYSNNTTGENSSNNLVNTNTIMNSTNNLAIINNMNNINNINNNNKFLLTTNPNVNQKVEKVLALKEKLAMKLCAMYNPNMLLVNNLVQATNPYLLNVNNTENANLQQINLETANSRQEGKRNDTQNDKTEKENEKENEKEKDKENEKDKEKDNNSID…	582	0	null	no	GO_0003676	GO_0003723	GO_0003676,GO_0003723	0	0	0	0	0	0	0	0	0	0	0	0	0	0	0	0	0	0	0	0	0	0	0	0	0	0	0	0	0	0	0	0	0	0	0	0	0
1300	PF3D7_0615700	RNA and export factor binding protein, putative	null	ATGAGAGACCTAAAAAAATATCGAGATGAACACCGGAGAAGAAAAAACAATTATAATAATAAATCACATGGAAAATATTATAATTACAATAAACACGATGATTATAAAACGAATAACCAACATAATAGAATAAATAAATATAGAGGGAAAGGTTCCTACGGAAGTAATTATGAAGAGAGAAATAATGAGATACGAGTAAAAATATCCAACTTAGATTATACTATTTCAAAAAATGATTTAATGGAATTGTTTAGTAATGTTTGTAAAGTTGTAAATGCTTGGATAAACTATGACCACACAGATAGATCAAATGGTACAGCAGTATGCGTTTTTGAAAATATAAATGATGCACAAAAGGCTATAGATAAATATGATGGTTCAGAAATTGAAGGATTATCA…	MRDLKKYRDEHRRRKNNYNNKSHGKYYNYNKHDDYKTNNQHNRINKYRGKGSYGSNYEERNNEIRVKISNLDYTISKNDLMELFSNVCKVVNAWINYDHTDRSNGTAVCVFENINDAQKAIDKYDGSEIEGLSIKMEILHKRNYTYKKKYKSRCPW	156	0	null	no	GO_0003676	GO_0003723	GO_0003676,GO_0003723	0	0	0	0	0	0	0	0	0	0	0	0	0	0	0	0	0	0	0	0	0	0	0	0	0	0	0	0	0	0	0	0	0	0	0	0	0
2483	PF3D7_1002400	transformer-2 protein homolog beta, putative	TRA2B	ATGAGTTCAAAAGAAGCACATAGTGAATCAGAAGAACCTGTTCACAAGAACGATGGTTCAACATTATATGTATCAAATTTAAGCTCAAAAATAACAACAGCGAAACTTCAAGATATTTTTGAAAAATATGGAAACATTGAAAAATGTTATGTTATAAGTAACCCCATAACCAAAGAATCTAGAAACTTTGGATTTGTCACTTTTAATAATTCTGAAGATGCAGAAAATGCAATGAATAAAGCCAATAAAATGGAAATAGAAGGAAGAGAAATCAACGTAGAAATTGCTAAGCGAAATGAGCCACATGAACCAACCCCAGGAGAATATAAAGGAGTACAAAATATAGTAAAGAGGAATGGATTAAGACACGATTATTACGGAAGAAAATATGACAGACCT…	MSSKEAHSESEEPVHKNDGSTLYVSNLSSKITTAKLQDIFEKYGNIEKCYVISNPITKESRNFGFVTFNNSEDAENAMNKANKMEIEGREINVEIAKRNEPHEPTPGEYKGVQNIVKRNGLRHDYYGRKYDRPYDRRRYDSRRVNPYGRDRMRNFGYRNNGYRHDRYDRRPRNDYRNYDRRSIDNKYYRRNDYYKRNARSSDNERGPSRDDSKRKKRYDRVRKSTSVSNSERRRYRNSPDRSPRYRRK	248	0	null	no	GO_0003676	GO_0003723	GO_0003676,GO_0003723	0	0	0	0	0	0	0	0	0	0	0	0	0	0	0	0	0	0	0	0	0	0	0	0	0	0	0	0	0	0	0	0	0	0	0	0	0
4541	PF3D7_1367100	U1 small nuclear ribonucleoprotein 70 kDa homolog, putative	SNP1	ATGTCAGCTATTGGTATGCCTCAACACATTTTAATTTTATTTCAAGCAAGGCCCATGCTTGAATTTTATAAACCCATAAAAAAAAAGAAACCAAAGGAATATTCGGGTTTGTCCGATTTCCTAAATTATTTTGAAGAAGGAGAAGCTCCTCCTAAGATAAAAGTAGAGAGTTTTAAAGAAAGGAAAGAAAAGAAGAAGAAAGAAAAAATGGCTTATAATGAATTAATTTTAAAAGAGAAAAGAAAAGAATACGATCCTTTTAAAAATGAAGATTTAACAAGTGATCCGAAGAAAACTTTATTTATTGGAAGATTATCTTATGAAGTAAGTGAACAAAAATTAAAAAAGGAATTTGAAAGTTATGGTAAAATTAAAACAGTTAAAATTATATATGATAAA…	MSAIGMPQHILILFQARPMLEFYKPIKKKKPKEYSGLSDFLNYFEEGEAPPKIKVESFKERKEKKKKEKMAYNELILKEKRKEYDPFKNEDLTSDPKKTLFIGRLSYEVSEQKLKKEFESYGKIKTVKIIYDKNLKPRGYAFIEFEHTKSMNDAYKLADGKKIENRRILVDIERGRTIKNWIPRRLGGGKGPARGSEEKKKIIHNINWTALINKDKYRNDKKRSDELYKNVPLYNERNNDDDEDDGISSTMRDYKHHRSDDHRRGSKRDRRHRSRRSESSDRHHHKHRRRDRSRDDRDRNYYDRHGRHDKHDRHDKYDRNDKYDRHDKYDRHDKYDKHDRYDRHDKYDRHNRHDKYDRHDRHDKYDRHDKHHNSDNPYDNSTKDDIRKENEINDIQHND…	423	0	null	no	GO_0003676	GO_0003723	GO_0003676,GO_0003723	0	0	0	0	0	0	0	0	0	0	0	0	0	0	0	0	0	0	0	0	0	0	0	0	0	0	0	0	0	0	0	0	0	0	0	0	0
4644	PF3D7_1405900	RNA-binding protein, putative	null	ATGAATGTAATTGACGATCAGGCTATCGATAAACACAAAGTGTTTGTACGAAATATCAAAGAAAGTGATGTACCTTTAATAACAAAAGAGTTTGAAAGAATATGTAATAAGCATTTTTTTTTTTCTAACAATAGTTACACCTCGAAAAATGCTATATGTCATTTTAAAAGTGCAAAGGATGCAGAAGATTTTATATCTAAATATAATAATATAAAATTATGTAATAGTTATATAAAAAGTGAATATGCGTTAAAGAAAAAATATGAAGATAAAAAATTAATATCCATTGTATATAATCGGAAAAAAATTAAATATGATAATTCACTTAAAATATATACAGATTGTAATGTAGATAATATTGTAATATTAAATTTTTTAAAAACTCTTTATGTTAATAAT…	MNVIDDQAIDKHKVFVRNIKESDVPLITKEFERICNKHFFFSNNSYTSKNAICHFKSAKDAEDFISKYNNIKLCNSYIKSEYALKKKYEDKKLISIVYNRKKIKYDNSLKIYTDCNVDNIVILNFLKTLYVNNTNLIYPLVEQYTKSESNSNVYNNINSSTYKNNDKIGDNNNSNKFIDDIEIVSDKKNIKFEDIIINIEKEMKHSRNNEKNKNNNTRLIDKNASKKIKIVYVIEFLNIKIAKMFFTLINKTVFQNFLKDQNVKNTHDKNNNNNNNNNNNKNNNNNNNNKNNNNNNNNDNIYFRYFFHELCQTKKNDKKVILQNLSRSCHVENIQKLFKHIEPNAKIFFPKKNNKKQGYAIVSFASLYNAQKALQLNKTKLCGNIITIQTINNNNDKSI…	1109	0	null	no	GO_0003676	GO_0003723	GO_0003676,GO_0003723	0	0	0	0	0	0	0	0	0	0	0	0	0	0	0	0	0	0	0	0	0	0	0	0	0	0	0	0	0	0	0	0	0	0	0	0	0
4645	PF3D7_1406000	RNA-binding protein 8A, putative	RBM8A	ATGGAAGATAATAATCTAAATAACGTTCTTAAAAATGATGAAGTCCCAGCAAAATCTGTAGAAGGCTGGATAATTATCATAACAAATATACACGGCGAAGCCAGAGATGATTACATAAAAGAAGTTTTTGAAAGGTTTGGACAAATAAAAAATTTACATTTAAATATAGATAGAAGAACAGGTTTTCTAAAAGGATATGCATTTCTTGAATATGAAAATTTTGTAGACGCAAAAAGAGCAATAGATGAAATGGATGGTACTATGCTACTAAATCAGGAGATACATGTAGACTGGGCTTTTGTGCAAGAAAAAAGTAAAACGTGA	MEDNNLNNVLKNDEVPAKSVEGWIIIITNIHGEARDDYIKEVFERFGQIKNLHLNIDRRTGFLKGYAFLEYENFVDAKRAIDEMDGTMLLNQEIHVDWAFVQEKSKT	107	0	null	no	GO_0003676	GO_0003723	GO_0003676,GO_0003723	0	0	0	0	0	0	0	0	0	0	0	0	0	0	0	0	0	0	0	0	0	0	0	0	0	0	0	0	0	0	0	0	0	0	0	0	0
5112	PF3D7_1454000	RNA-binding protein, putative	null	ATGGATAGTTTGTATGGTGATTTACCACCTCCAGTTTCTAGTAATAAAAAAACTGGAGGAAATAATGAAAAGAAAAATTTGATAAATGAGGAGAAGAATAATTATATTGGTTTCAATAAATTTTTAATAACTCCAGCTATTGTTCAAAAAAATATTGCAAATACAAAAAAGGAAAAAAAAGAATTGGAAAAAAAAAATTCAGGTAATGAAGATGAAGAAAATGAAGGACAAAGTGATGATGAAGAAGATATATTCTGGAACCATTTGAAAGATGGAAATGTAAAAAATAAAGTTGAAAAAAATAATTTAAATATAAAAAAAAAAGAAAAAATAAATGAGACTACTACTAATATAGAAATTATTAATATGAACAAGTCAATTCAAGATGATTTAAAAAAA…	MDSLYGDLPPPVSSNKKTGGNNEKKNLINEEKNNYIGFNKFLITPAIVQKNIANTKKEKKELEKKNSGNEDEENEGQSDDEEDIFWNHLKDGNVKNKVEKNNLNIKKKEKINETTTNIEIINMNKSIQDDLKKISDRLNKIQHNYKNEQVPINSNKNIKELFVNNNFETDIKHTKSNHYQIDNLLNHENMENDTFQYDLYEKYFIANANEDYEPNKPNDLIKIIKERKRKKIIMLAEQKKKLEMEEMDDSPEKDTNNVNCYERKNSNINSLKNMELDYEKKRKLNEFDDLKGYDEERKKKETDIRKSIDNNMSNHPSDDDYTYNYGNINHNENSYNSNDDNKDTTTSKKDFATRMMEKMGWKKGEGLGKDKQGIKAPLILKKVDKRSGVIVQAPVILKN…	511	0	null	no	GO_0003676	GO_0003723	GO_0003676,GO_0003723	0	0	0	0	0	0	0	0	0	0	0	0	0	0	0	0	0	0	0	0	0	0	0	0	0	0	0	0	0	0	0	0	0	0	0	0	0
4466	PF3D7_1359400	CUGBP Elav-like family member 1	CELF1	ATGGATGATCATGAGAATATAGATATTAACGATAATTCTTCTGATGCGAATACTGCAAATTACAATCAGGATAAAAATGAAAATACATCAGAAGTAAATGACTACAGTAAAGAAGATATAGAAGGAGATGAAAATTTAAAAAGTTCAAAGGGAAAACAAGAAAATAATACGAAAAGTTCATCAGATAAAGATGAAAATACAATAGATTATGGAAATCATGATTTCCCATGTAATCCAGCACCTCCAGTTCCTATAAAACTATTTATAGGAAGAGTACCAAAAAATATTGAAGAAGATCAATTACGTCCAATATTTGAGGAATATGGTATAGTTAATGAAGTAGTAATTATAAGAGATAAAATAACTAATGTACATAAATCTAGTGCTTTTGTAAAAATG…	MDDHENIDINDNSSDANTANYNQDKNENTSEVNDYSKEDIEGDENLKSSKGKQENNTKSSSDKDENTIDYGNHDFPCNPAPPVPIKLFIGRVPKNIEEDQLRPIFEEYGIVNEVVIIRDKITNVHKSSAFVKMASISEADNAIRLLNNQKTLDAQLGSLQVKYASGELNKLGFPQNIESGVDQAKLFIGSLPKNITEDNIKEMFSPYGTVEEVFIMKDNSTGLGKGCSFVKFSYKEQALYAIKSLNGKKTLEGCTRPVEVRFAEPKSSKQPQIPLTLQPMQNPPHAMAPQPSISSPNNINFGNNFSVNNNYPRQVGPWKEYYSGEGRPYYYNEQTNTTQWEMPKEFETLFMNNSANMHNLSESSGPPGANLFIFHVPNEWQQTDLIQAFSPFGELLSAR…	509	0	null	no	GO_0003676, GO_0005515	GO_0003723	GO_0003676,GO_0005515,GO_0003723	0	0	0	0	0	0	0	0	0	0	0	0	0	0	0	0	0	0	0	0	0	0	0	0	0	0	0	0	0	0	0	0	0	0	0	0	0
1881	PF3D7_0812700	U1 small nuclear ribonucleoprotein C, putative	SNRPC	ATGCCAAAGTATTATTGTGAATATTGTGATATATATCTAACACACAGTTCACCTGTTGGGAGGCGTCAACATATACATGGGAGAAAACATATTAGTGCCAAGATAGAATATTTTCAAAATTTATTAAGAGAAGAAGGTATCACACCTCAAAATTTTTTAGGATTTTTAAATAATAGAAATATAAATAATCCATTAGGAAATCCTATGATGAATTATATGAATCCAAATATGTATATGAAGTATAATCCAATGAAAAGTTATCATTCATATTCGATGAGGAGTTCACATCCATATCGTTTAAATATACATAATAATAAATATTCAAGAGCTGGATATGTCCCACCAAGTCATCATAAATATTCTGTTAACCCAATGCACAATAATTACCATCAGGCACAT…	MPKYYCEYCDIYLTHSSPVGRRQHIHGRKHISAKIEYFQNLLREEGITPQNFLGFLNNRNINNPLGNPMMNYMNPNMYMKYNPMKSYHSYSMRSSHPYRLNIHNNKYSRAGYVPPSHHKYSVNPMHNNYHQAHNNYSYPNSINPSNQINYSNNYGSNNFNNSNEFNKNMNEKDNINNNDIHDNKVKTDENDPINNDNLNNTRNFSYEENHYSTDHKKPSFLNPENSKEHIESDIS	235	0	null	no	GO_0003676, GO_0008270	GO_0003723	GO_0003676,GO_0008270,GO_0003723	0	0	0	0	0	0	0	0	0	0	0	0	0	0	0	0	0	0	0	0	0	0	0	0	0	0	0	0	0	0	0	0	0	0	0	0	0
1121	PF3D7_0529500	cell cycle regulator protein, putative	null	ATGAAAAGTTTTTCTGTTGAAAATATTTCATCTCAGAATTTGATGAAATCATCAGTTCAAAGGAGTATAAAAGCAACGATATTAAAACAATATCCCAAGTTGGAAGATCATATTGAGAATATTTTCCCAAAAAAGGGTTCTTTATTTTTAGGAAAATGTATTAATCACGTTACAATTATTCTTGGAAATAATGAGCTTTTATTTTTTCAAATAAGAAATGGACCATGGATACCAAATTTAAAATTAGTACACAAATATCCTTTTATGATGCCACAAATACAAGTTGATAAAGGGGCTATAAAACACGTGCTGAGAGGTTCTAACATTATGTGCCCTGGAGTAACTTCTCCTGGAGGGAAACTTGATGATGTTGAAGCAAACACAGTTGTTCAAATAAGA…	MKSFSVENISSQNLMKSSVQRSIKATILKQYPKLEDHIENIFPKKGSLFLGKCINHVTIILGNNELLFFQIRNGPWIPNLKLVHKYPFMMPQIQVDKGAIKHVLRGSNIMCPGVTSPGGKLDDVEANTVVQIRAEDKEFPCAVGITTMSSKEIIEINKDMCIENIHYLNDGLWNFKIET	179	0	null	no	GO_0003723	GO_0003723	GO_0003723,GO_0003723	0	0	0	0	0	0	0	0	0	0	0	0	0	0	0	0	0	0	0	0	0	0	0	0	0	0	0	0	0	0	0	0	0	0	0	0	0
1192	PF3D7_0605100	RNA-binding protein, putative	null	ATGATAAAACAACAAAAAAGATCATATGCACTTGTTGATAATGAGGTTGGTAATAGTAATATTAGTGATGAGGAAAATATAATAAAAAGGCAAAGAAATGAAAGTAGGAGTAGTACTAGGTCATATATGGATGAGGATGGGAAAAGTAATTGTGCAACTAGTACTGAGATGCGTATTCCATATTGTTTATTATTACCAAATAGGGCTATAGGATATGTTATTGGGAAATCAGGTAATAATGTACGTGAAATAGAAAAGGCGTGTGGTGCTGTTATAAAATGTCAAAAAGAATTTGATGTATCTGTTTATCCTCCACCGTCTGAAAAAATTTTAACAATATTTGGAAAAAAAGAAAATAAGAAAAAAGCATTAGAATTAGTTCTAGGAAAATCGAAAAGT…	MIKQQKRSYALVDNEVGNSNISDEENIIKRQRNESRSSTRSYMDEDGKSNCATSTEMRIPYCLLLPNRAIGYVIGKSGNNVREIEKACGAVIKCQKEFDVSVYPPPSEKILTIFGKKENKKKALELVLGKSKSVMDFQEEDGKESIVIIVPTRSIPIIIGQKGSKISSLSERSSCEINVHKDDVPGIKDKAIFIKSKKISKIIDCIGIIYDLLEDVVENGILTISEFPGVPKNDINNNNDDIIDNDHINDNDEHNNFDDHISDYNINNNIITNNIPTHMNNNMMNINNINNINNNNNNNRMHPNNSINYRNMNNHNNNPHYQHNYNNSNMNNPNNNSKYMNMKKNDNYMDDNMSIDDNDNYSVPKEKNLLLHKYGKEVSPCVVRFVLDVETTAWIIGKA…	755	0	null	no	GO_0003723	GO_0003723	GO_0003723,GO_0003723	0	0	0	0	0	0	0	0	0	0	0	0	0	0	0	0	0	0	0	0	0	0	0	0	0	0	0	0	0	0	0	0	0	0	0	0	0
4742	PF3D7_1415300	RNA-binding protein Nova-1, putative	null	ATGGTTGAAATTAATAAAGGAGACCATCGAAATGTATTAAATGGAAATCAGTTGTGTTTTGTAAAATTGCTTATAAATAATTTGGTTGCCGGATCAGTGATAGGAAAGCATGGTTCCATAATTACAAGTATAGAGAACAAAACAGGATGCAGTTTAAAATTATCACCGAATAATTCTTATTTTCCAAATACACAAGAGAGGGTTTTAGTATTATGTGGTAAGATAGATCAGATTAAGGATGCTCTTTTAATAATATTGGATAAGATAAAAGAAGTTGCTAATCAACATTCTCATGAAAAACAAAATATGATGAATGGAGCAGCAAAATATACATGTAGAATTGTAGTACCCAAATCTGCAGTGAGTGCTATTATTGGAAAAGGTGGACAACAAATAAAA…	MVEINKGDHRNVLNGNQLCFVKLLINNLVAGSVIGKHGSIITSIENKTGCSLKLSPNNSYFPNTQERVLVLCGKIDQIKDALLIILDKIKEVANQHSHEKQNMMNGAAKYTCRIVVPKSAVSAIIGKGGQQIKQLQDSTGSKIQISSREDGLNERIITIIGSFESIRDTALKVANSIQKDPNLKDLLNVIYNNESNNYNSRNNNHNFINQLPLNGYVLPQRYNVFQHEPYVDINMINSLMRHSRDLFNLPCEISIQIPDEFIGAVIGKNGSRLTNIMNSTGAQIRISRKGELVPGTTNRKVRIIGSVAAVHAAHVLLLQRLESAYMQLRTMQIKCDP	337	0	null	no	GO_0003723	GO_0003723	GO_0003723,GO_0003723	0	0	0	0	0	0	0	0	0	0	0	0	0	0	0	0	0	0	0	0	0	0	0	0	0	0	0	0	0	0	0	0	0	0	0	0	0
5317	PF3D7_1474500	splicing factor 3A subunit 1, putative	SF3A1	ATGCTCAATATTATTGTTGAAAAAAGCCTATTTGATGACGATGTGGATATACATGATAAAGAAGTGTTGCAGAAGAGGTTCAACTTTTTGGAGAAAGAAATGATAGTACCTCCAAATAATATAAAAACTGTTATTGATAAAACGGCTACGTTTGTTAAGAAAAATGGAAAAAACTTTGAACAGAAAATATATAGAGAAAAAGAAAAGCAATTTGGTTTTATTAGTCCTTCACATCCATATTTTTATTATTATCAATATAAATTACATGGTTTGTTTTTGGATATTCAAGAAAAGGATGAATTAATTCCTCATGTTATTAAAGAAATAAAAAAAAGAGAAGATGCGAATAAATATACAAATAATGAACATATTTTAAAAATATGTGATTTTATAAAAGAA…	MLNIIVEKSLFDDDVDIHDKEVLQKRFNFLEKEMIVPPNNIKTVIDKTATFVKKNGKNFEQKIYREKEKQFGFISPSHPYFYYYQYKLHGLFLDIQEKDELIPHVIKEIKKREDANKYTNNEHILKICDFIKEDEKEERKNIIYSLDDMKKIDKLENNNNLKIQIQEDIYSLISPFITSLDIDLIKTTALFVARNGKSFLNGLIEREKNNSQYDFLRANNLYFNYFSKLIDIYLKCLLPSDDILDKIKKYANNKSNILNYSYILYSHNKKKKEEEERKLEEKNKSDTYYDWTHFSIVETINFEDDLKNLPCSIDFNNVENYVISELFDTDKMYTNEEKLNNISYHEKNVFKTLGKEELYEDNMGQEIFLDDNKYDARRDELYDEKYEDKHSEQNDEHDG…	701	0	null	no	GO_0003723	GO_0003723	GO_0003723,GO_0003723	0	0	0	0	0	0	0	0	0	0	0	0	0	0	0	0	0	0	0	0	0	0	0	0	0	0	0	0	0	0	0	0	0	0	0	0	0
5261	PF3D7_1468800	splicing factor U2AF large subunit, putative	U2AF2	ATGTGGAAAAAGCTTACTTCACTTAAAAATAGTAATTGCAAATCTGATGTAAGTAATATAGAAGAAAATGATAAAAAAAATGTAAAAAAAAGTGATACACAAAATGAAGATTCCGAAAAAAAAAGTACAGGAACTAGTAATGGTATGTTAAGTATTAAAAAAAAAGATACTAATGAAACTGATAAAACAGATGAATATAATTTAGATTCAAATAAAAAAAAAAAAAGCTTTTACCAAAAAAAAAAAACAAGTAATAAAGAAATTGAAGAACCAAAAGATATATTAAAAGATGATACCAAAGACGTTATTGTAGATGATGATACAAATATAAAAGAAAATGATAATCTTAAAAATGAGTTTATCTCCAGTAATAATAAAAAAAAAGAAAAATATGAAAAA…	MWKKLTSLKNSNCKSDVSNIEENDKKNVKKSDTQNEDSEKKSTGTSNGMLSIKKKDTNETDKTDEYNLDSNKKKKSFYQKKKTSNKEIEEPKDILKDDTKDVIVDDDTNIKENDNLKNEFISSNNKKKEKYEKDLECNEERIHNDKKMNHCHDKEQNEKENEDKESKQIDIKEVKNSIEKIKEKFGKNVDEKIRRNESLDKKKDAHSVKNKTGNRNSTSRSRSRNRNRSKDRYLNKRKTIEVHSNSEENKQEKRRTKSRERSIEYRKKSKDKWRDRSKEKSRQRSRDRSKERSRQRSRDRWRDRSRDRWGLDRRRSRYKDSRDRNKFSYHSRSISSDEEHYSKNKKRTKRRKSRHNIDKDSYSSSSNSTHRRRNRKSSSSNNTRKDDNNSIQKKRKKSK…	833	0	null	no	GO_0003723, GO_0003676	GO_0003723	GO_0003723,GO_0003676,GO_0003723	0	0	0	0	0	0	0	0	0	0	0	0	0	0	0	0	0	0	0	0	0	0	0	0	0	0	0	0	0	0	0	0	0	0	0	0	0
1378	PF3D7_0623600	transcription or splicing factor-like protein, putative	null	ATGTATTATGACCCGCTGGTTGCACTTGTGAATATATTACCCGTAGAAAAGTTAAGCGATGAGAATAGTAAAAAAAAATCAAGGTGGGAAAGAAATGCAACTAACAATATTATAGAAAATAAAGTAGTTGTATCGAACAAATGGGGGTCTGAAGATTATAAACCTTATCTTCCATTACCTTTTGTTGATTTCCCACCAGGTTTAACTCCGGCGCAATTAGATCAATTTTTGAGAGAACAGCGATATGATGAATTAACAAAAAAATTAAATAAAGGAGAATTAGAATATGTAGATCCAGACATTCGACCGCCTTCTCCACCTCCTATATATGACAAGAATGGTAGTAGGATAAATACAAGAGAAGCACGAATAAAAAATAGTATGATAGAAGAACATCAT…	MYYDPLVALVNILPVEKLSDENSKKKSRWERNATNNIIENKVVVSNKWGSEDYKPYLPLPFVDFPPGLTPAQLDQFLREQRYDELTKKLNKGELEYVDPDIRPPSPPPIYDKNGSRINTREARIKNSMIEEHHRLIEYLLKHVDGFVAPPTYKPIKKIRKIEIPIDKYPEYNFMGLIIGPRGCNHKRLEAESGAQISIRGKGTLKEGKKTDHQTEIEAAMPKHVHIAADTEECVEKAVSLITPLLDPFHPLHEEYKRKGLEQLALVNGINLNQLDTQKCSICNSNTHLTFECPENMNIQNFKKPEIKCNLCGDHGHITLDCKLAKQSSNYINKNDLENSNNLSQPIHTHVHSPAPPPPPPPPPLYDPLISTPQGFNGMYKMDTKKMDLEYEKMMNELNS…	615	0	null	no	GO_0003723, GO_0003676, GO_0008270	GO_0003723	GO_0003723,GO_0003676,GO_0008270,GO_0003723	0	0	0	0	0	0	0	0	0	0	0	0	0	0	0	0	0	0	0	0	0	0	0	0	0	0	0	0	0	0	0	0	0	0	0	0	0
754	PF3D7_0417100	mRNA-binding protein PUF2	PUF2	ATGGACTCCATTTTTTTAGAAGATGATGCAATTGGACACGTAAATAATATAGACCATATAAACGATATTAATAACATCGGAGTTATTAATAATACAAATAACATAAATAATGTTAATGATGTTGTAGATGAATTTAATTTTAAAGATCAATTAAAACATTTGAAAAATATGAAAACCTGCTCAACCAGTTATAACAGTATGCCATCATCAAACATTGAAATGTTGTTTGATCAAGAACTAATGGGAAATCAAAACATTCTTTTTTTAAATGATCCAGAGAATGACATATTTAATTTTTCAAGGGGAATAATCAAAGATGAATATTACAAAAACTATTATATTCATAAAGAAAATCAAGAAAAAATAGATTATAATCAGATTTATCATAATTTTGAGAAT…	MDSIFLEDDAIGHVNNIDHINDINNIGVINNTNNINNVNDVVDEFNFKDQLKHLKNMKTCSTSYNSMPSSNIEMLFDQELMGNQNILFLNDPENDIFNFSRGIIKDEYYKNYYIHKENQEKIDYNQIYHNFENNHNFEYFKNSEHYEKSPEQVIDNKRYYENLPEQVIINKKDMFKNDEEKHNEEGQVHIDMSKVMYDIYFLCFHKNGCEYIIKKLKEDNKEEKEIILNSLLIDTMSLCPDIYGSYVAQSIFDLKDEKYKERFTDEFLKHTSFLTLHTYGCRLIQKSLESLSDEYKCKIFKELQEDLIKYICHQNGNHVIQKCVEVLPCSYIDIIINIIEEYLPFLSSHAYGCRIVQRIYEIGNEQQINRLNEQIIKKIHLIKNRYGNYVIQKCFEHSD…	514	0	null	no	GO_0003723, GO_0005488	GO_0003723	GO_0003723,GO_0005488,GO_0003723	0	0	0	0	0	0	0	0	0	0	0	0	0	0	0	0	0	0	0	0	0	0	0	0	0	0	0	0	0	0	0	0	0	0	0	0	0
988	PF3D7_0516200	40S ribosomal protein S11	RPS11	ATGGCATCAAAAAAAGTAAAAACACCTCAACCTGAAACAGCTATTGTTTCTGGTCCTCAACCAAAAGAAGGAGAATTAGTTTTTGGTGTGGCTCATATTTTTGCATCTTTTAACGATACATTTATACACGTAACAGATTTAAGTGGAAGAGAAACTTTAGTTAGAATTACAGGTGGAATGAAAGTTAAAGCTGATAGAGATGAATCTAGTCCATACGCTGCTATGATGGCTGCTCAAGATGTAGCTGCAAGGCTAAAAGAATTAGGAGTTACAGCTATCCATATTAAACTAAGAGCCTCCGGTGGTACTAAATCTAAGACCCCTGGTCCAGGAGCCCAATCAGCCTTAAGAGCTTTAGCACGTTCCGGATTAAAAATAGGAAGAATTGAAGATGTAACT…	MASKKVKTPQPETAIVSGPQPKEGELVFGVAHIFASFNDTFIHVTDLSGRETLVRITGGMKVKADRDESSPYAAMMAAQDVAARLKELGVTAIHIKLRASGGTKSKTPGPGAQSALRALARSGLKIGRIEDVTPIPTDSTRKKSGRRGRRL	151	0	null	no	GO_0003735	GO_0003723	GO_0003735,GO_0003723	0	0	0	0	0	0	0	0	0	0	0	0	0	0	0	0	0	0	0	0	0	0	0	0	0	0	0	0	0	0	0	0	0	0	0	0	0
755	PF3D7_0417200	bifunctional dihydrofolate reductase-thymidylate synthase	DHFR-TS	ATGATGGAACAAGTCTGCGACGTTTTCGATATTTATGCCATATGTGCATGTTGTAAGGTTGAAAGCAAAAATGAGGGGAAAAAAAATGAGGTTTTTAATAACTACACATTTAGAGGTCTAGGAAATAAAGGAGTATTACCATGGAAATGTAATTCCCTAGATATGAAATATTTTTGTGCAGTTACAACATATGTGAATGAATCAAAATATGAAAAATTGAAATATAAGAGATGTAAATATTTAAACAAAGAAACTGTGGATAATGTAAATGATATGCCTAATTCTAAAAAATTACAAAATGTTGTAGTTATGGGAAGAACAAGCTGGGAAAGCATTCCAAAAAAATTTAAACCTTTAAGCAATAGGATAAATGTTATATTGTCTAGAACCTTAAAAAAA…	MMEQVCDVFDIYAICACCKVESKNEGKKNEVFNNYTFRGLGNKGVLPWKCNSLDMKYFCAVTTYVNESKYEKLKYKRCKYLNKETVDNVNDMPNSKKLQNVVVMGRTSWESIPKKFKPLSNRINVILSRTLKKEDFDEDVYIINKVEDLIVLLGKLNYYKCFIIGGSVVYQEFLEKKLIKKIYFTRINSTYECDVFFPEINENEYQIISVSDVYTSNNTTLDFIIYKKTNNKMLNEQNCIKGEEKNNDMPLKNDDKDTCHMKKLTEFYKNVDKYKINYENDDDDEEEDDFVYFNFNKEKEEKNKNSIHPNDFQIYNSLKYKYHPEYQYLNIIYDIMMNGNKQSDRTGVGVLSKFGYIMKFDLSQYFPLLTTKKLFLRGIIEELLWFIRGETNGNTLLNK…	608	0	null	no	GO_0004146, GO_0004799	GO_0003723	GO_0004146,GO_0004799,GO_0003723	0	0	0	0	0	0	0	0	0	0	0	0	0	0	0	0	0	0	0	0	0	0	0	0	0	0	0	0	0	0	0	0	0	0	0	0	0
440	PF3D7_0308900	splicing factor 3B subunit 1, putative	SF3B1	ATGGTAAACATACGCAAGAATGGAGCTTTGAGAAAAAGTAAAAGCGATGCTAGTAATAAAAATATGAGTTATGATGAGAAAGATAAATTAATTAATATTGGGAGAAGCGAAATAAGATATGTTAAAGAAATTGACCCTGATATGAGCGACCAAGAAAATCAGAACGATGATGATGAAAATAATAATAATAATAATAAGGGACGTCTTTCTTTTAATAATGAATATTCTAAGAAAAAAGAAAAGGAGAATATAAATATTAATAAATTTAGAAATGAAATTATCGAATGTGATTTAATAAATAATAAAGATCATATGAATGATATAGATTTAGGATTAACTAAAGATAAATCGATCAAGAAAAGAGAAAATGCATTTCAAAAAAAAAAATATGATTATACT…	MVNIRKNGALRKSKSDASNKNMSYDEKDKLINIGRSEIRYVKEIDPDMSDQENQNDDDENNNNNNKGRLSFNNEYSKKKEKENININKFRNEIIECDLINNKDHMNDIDLGLTKDKSIKKRENAFQKKKYDYTLSPQRADPFADKSPSPGERTYTDIMLENKKKSKMKEASRKLSHYNKQGDSTNDTKEKMENENSHGGNSHDDDNNNYNNYNNTDDANSNDSDADILRGMKNEKNEKKKITNNLKSKWDVVKHEKNNLNMSNMPTHATEKWTEHSSFVVNNNKKKKNSRWDKISKEQEDVKRVKLNKENNDNMSTPYISNNMSTPYISNNMNTPYISNNMNTPYISNNMNTPYISNNMNTPYISNNMNTPYIPNNIKTPFTPMVDTSLSTDDLIKIKI…	1386	0	null	no	GO_0005488	GO_0003723	GO_0005488,GO_0003723	0	0	0	0	0	0	0	0	0	0	0	0	0	0	0	0	0	0	0	0	0	0	0	0	0	0	0	0	0	0	0	0	0	0	0	0	0
1349	PF3D7_0620500	cleavage stimulation factor subunit 1, putative	null	ATGAAGGATTTGAATGCTATCAATAAACTTTTATCATCAAATAATGAAATGAATAAAAAAAATAATGATAGCGATAATTGTGTTGTCATAGAAGATGAAATAGATGAAAATTATGCTGAAGGAGAGTTGGAAGAAAAGAGCGAAGAAGATGAAGTTGGCGATAATAATATGAATGGAAATAATATAGATGATGATAATATAAATGATGATGATAATTATAATTACCATGACGATAATGAGTGCGATTATGAAGAGGACTATGATAATGGTGAAGACTATTATGATGATGAATATAAATATGAAAAGGTTCAAAGAAAAGATATATTTTTAAATATTGATAAAATAGGTTTTTATGAACTAGTGTTAAAACAACTTTTGGATGACAACTTAATAGAGTCA…	MKDLNAINKLLSSNNEMNKKNNDSDNCVVIEDEIDENYAEGELEEKSEEDEVGDNNMNGNNIDDDNINDDDNYNYHDDNECDYEEDYDNGEDYYDDEYKYEKVQRKDIFLNIDKIGFYELVLKQLLDDNLIESYNIMKAELNNLEENKYVKGDFLFNMYLKSDNLNFFQLLKREKCYEKDKNVDDEEIKREDKEKVKKEDDIKVKKEEEQKDEHEDDEKKFNNDENNENNENNNNNENNNNNENNNNNDDNDDNENNDDNSDDEKDDINNVSSDNPNILNKLVDNNVLNIKLKMYNNNNFILNYDVNSERVRRTYSYEVNDQIELIHKNKCLCCDINYNNSILCSGGSDNIVKISKMYDIKNKKKIYNIDKHKGKVNCIKFHPFKNILFSGGDDCTIQI…	650	0	null	no	GO_0005515	GO_0003723	GO_0005515,GO_0003723	0	0	0	0	0	0	0	0	0	0	0	0	0	0	0	0	0	0	0	0	0	0	0	0	0	0	0	0	0	0	0	0	0	0	0	0	0
1981	PF3D7_0822800	U5 small nuclear ribonucleoprotein 40 kDa protein, putative	SNRNP40	ATGGCTTTAATAAAAGCTGATACGTACGTTTTAGAAAGGGATGAAAACAATGAAGTGGAGGAAAGGAAAACAGGATTATTTTCCCCGACAATGTTAATAAATAGTCATAAAGGAGAAGTGTATTCAATTAATTTTTCTTCGGATGGAAAATATATAGCATCATCAAGTTTTGATATGACTATAATGGTTCATAATGTTTATAATGAATGTGAAACTATAGGTGTTTTAAGAGGTCATAAGAACGCAGTATTACAAGCTAAATGGTTACAGGATGATAATTATATATGTAGTGCATCAGCTGATCATAAATTATTTTTATGGGATGTTGAATGTGAATCCAAGTTAAGAAGTTTTAAAGGACATGATAATATTGTTAATGGATTAGATATAATTAATCAT…	MALIKADTYVLERDENNEVEERKTGLFSPTMLINSHKGEVYSINFSSDGKYIASSSFDMTIMVHNVYNECETIGVLRGHKNAVLQAKWLQDDNYICSASADHKLFLWDVECESKLRSFKGHDNIVNGLDIINHNLFVSCSDDNTLKFWDIRSKWAVHIIKHDFPLLSVCSDKKGEFLFTSCVDNTIKKYDCKNYKLKDTFIGHKDYITGLDINKDETMLASISADESICFWDIQPFSCEEKLLFQLNSPKYNIDYNLIKLSFNNDNLLACGSGDNYLYIYDYKQKILKYSLPGHTSTINDVAFHPVEDIVASCSSDHTIFLGEI	324	0	null	no	GO_0005515	GO_0003723	GO_0005515,GO_0003723	0	0	0	0	0	0	0	0	0	0	0	0	0	0	0	0	0	0	0	0	0	0	0	0	0	0	0	0	0	0	0	0	0	0	0	0	0
2498	PF3D7_1003800	U5 small nuclear ribonucleoprotein component, putative	EFTUD2	ATGGATACGAAAAATAATTTATATGATGAATTTGGTAATTATATAGGAGATGATATTGATAGTGATGAAGAATATTCTGATTATAATGAAGATGGGATGAGTGACGGAGAGTATAGTAAAGGAAGCTCAAACAATGATGATAATGAGGAAGATAATGATGATGATAATGAGGAAGATAATGAAGAAGATGATGAGGAAGATAATGAGGAAGATAATGATGACAAAAGCGGGAAGAGGAACAAATTAATTGAAAATATGGATGAACTACAAAAAGTATATGACGGTGTTGAAGTTTTTGTTGAAGAAGAAGACACACAAGATATTGAAGAGGCTACAATAAATAAGATTAATGCAAATGTTGAAAGAATTAGTTTTATTAAAAAGTTAGATGTGGAAGCA…	MDTKNNLYDEFGNYIGDDIDSDEEYSDYNEDGMSDGEYSKGSSNNDDNEEDNDDDNEEDNEEDDEEDNEEDNDDKSGKRNKLIENMDELQKVYDGVEVFVEEEDTQDIEEATINKINANVERISFIKKLDVEANRKNFDLVETSLPNNNFSFKYLSELMKQTSFIRNICIAGHFHHGKTTIVDRLIEYTRDKKNNIRISNNRNKNSSTVSFFNVNNINEISEKSNYLSNISRKKKNINSSQIINNYNNNNIKRTPYNSKIIDHLINYTDTRLDEQARGLSIKAMPISLLFSNRIYENIPNNILLNKKKDNVKYKSYLFNIIDTPGHVNFFDEFLCSLNICECCCLVVDVVDGCMYVTENIIKACIYENVKIILIINCIDKLIMDLRLPPNDAYHKINYT…	1235	0	null	no	GO_0005525, GO_0003924	GO_0003723	GO_0005525,GO_0003924,GO_0003723	0	0	0	0	0	0	0	0	0	0	0	0	0	0	0	0	0	0	0	0	0	0	0	0	0	0	0	0	0	0	0	0	0	0	0	0	0
3053	PF3D7_1119300	splicing factor U2AF small subunit, putative	U2AF1	ATGGCTGAGCATTTAGCTCGAATTATTGGGACAGAAGAGGACAGAGTTAACTGTCCTTTTTTTTGGAAAATAGGTGCTTGTCGTCATGGTGATCAATGTAGTAGAAGTCATTATAAACCAAATTGTGCTCAGACATTAGTAATAAGACATATGTATGATAACCCACCTATAGCTGTTGCAATAGCAGAAGGTCAAATGGTAGAAGATGAAGTATTAGATAAAGCAGCTGACCATTTTGAAGAATTTTATGAAGAAGTATTTGATGAATTAATGAAATATGGAGAGATTGAAGATATGGTTGTTTGTGATAATATAGGTGATCATATTATTGGTAATGTGTATATTAAATATACACATGAGGATTATGCTGAAAAGGCGGTAAACGAGTTAAATGGTAGA…	MAEHLARIIGTEEDRVNCPFFWKIGACRHGDQCSRSHYKPNCAQTLVIRHMYDNPPIAVAIAEGQMVEDEVLDKAADHFEEFYEEVFDELMKYGEIEDMVVCDNIGDHIIGNVYIKYTHEDYAEKAVNELNGRFYAGKPLQIEYTPVTDFREARCRQFVEGQCRRGGYCNFMHIKHVPRTVKRKLFRRMYKKYPEYKKRRARKDDSDDDGRRESYREGKDKYKRDRRSSHHYSSKRKNRSDNEDDDDDEERSYKHARRENSAERREKIERWNKEREMKNMNKEDNKSNADEKED	294	0	null	no	GO_0046872, GO_0003676	GO_0003723	GO_0046872,GO_0003676,GO_0003723	0	0	0	0	0	0	0	0	0	0	0	0	0	0	0	0	0	0	0	0	0	0	0	0	0	0	0	0	0	0	0	0	0	0	0	0	0
743	PF3D7_0416000	RNA-binding protein, putative	null	ATGAACGAAACTAAAGAAGATACTTCCGACAGAGCAGATGAGGTATCATTAGAAAACCTTTCCTTTGAAAAACGGTCGTTTGAAAAATTATCATCAGAAAAACCTTCATCAGAAAAACTTTTATCAGACAAACTTTTGTCAGAAAAACTTTTGTCTGATAAAGAAGAGGATGAAAAAAAAAATGTTATAAAAAATAAAAACTTAAAAAAAAGTAACAAAAAAATTATTAAAAAGAATAAAAAGAAAGGGAAAATAAAAAAAAACAATTCAAAAGAAAATCAACCAACTACTTTATTATCAAATAATGATCGTAATAAGAATAATCATGTTTCTAATAATAAATCTAATAAACCTATCATTATTTCTTCTCATATTATACCCCCTCCACCACCTACTTTC…	MNETKEDTSDRADEVSLENLSFEKRSFEKLSSEKPSSEKLLSDKLLSEKLLSDKEEDEKKNVIKNKNLKKSNKKIIKKNKKKGKIKKNNSKENQPTTLLSNNDRNKNNHVSNNKSNKPIIISSHIIPPPPPTFKPPPPPPPKEKNKIEKWTLRKNAAYSMNTNIDLPNTTNGNVINNNNNNNNNNFSNILITNQNNNHNLQHIHNNSNRNMQNDNNIINNIGIHSTGTLSVGNNHILGKPSLSLKPLNNHWNINNNYMKKGEPNINMKKLSSVELRHSINYNINTNNKKNDIINNNMMYYNITNNNMDKDKFKNHLQIRHGSYYQNINPINIIKEQEDKNKKNTLLPNSNMNQINKDPIYYMNKASYEYNLKGNVIYPPKFPAVSNFSSNRPYLLKAPS…	579	0	null	no	GO_0003676	GO_0003723, GO_0003676	GO_0003676,GO_0003723,GO_0003676	0	0	0	0	0	0	0	0	0	0	0	0	0	0	0	0	0	0	0	0	0	0	0	0	0	0	0	0	0	0	0	0	0	0	0	0	0
4116	PF3D7_1323100	60S ribosomal protein L6, putative	null	ATGAAAACTATAGTATCAACACAAAAAGTATTAATTCCTGAAGGAGTCAAGGTAGCCATAAATGCAAGAAAGGTAACCGTATCTGGTAAGTACGGAACCTTAAGAAGGAGCTTCAGGCATTTACCAATAGATATTAGATTAAACAAATTAAAGAAATATATTAAGGTAGTTATGTGGTTTGGTGTCCCTGACAGTTTAGCTTGTATTCGTACGGTTTGTACACATTTAAAAAATATGTTTACTGGTGTTACCAAAAAGTTCTTATATAAAATGAGATTAGTACATGCTCACTTTCCCATCAACTCTAATATTGTAGATAATAACACAAGAATCGAAATTAGAAACTACTTAGGAGAAAAAAGTGTTAGATTTGTTAAAGCCTTGCCAGGAGTTGTTATC…	MKTIVSTQKVLIPEGVKVAINARKVTVSGKYGTLRRSFRHLPIDIRLNKLKKYIKVVMWFGVPDSLACIRTVCTHLKNMFTGVTKKFLYKMRLVHAHFPINSNIVDNNTRIEIRNYLGEKSVRFVKALPGVVIEKSPNVKDEIYVSGADIENVSLTAALIHQSVLCRNKDIRKFLDGIYVSEVTTVEKDE	190	0	null	no	GO_0019843, GO_0003735	GO_0003723, GO_0003735	GO_0019843,GO_0003735,GO_0003723,GO_0003735	0	0	0	0	0	0	0	0	0	0	0	0	0	0	0	0	0	0	0	0	0	0	0	0	0	0	0	0	0	0	0	0	0	0	0	0	0
4093	PF3D7_1320900	RNA-binding protein, putative	null	ATGAGTGATAATAATGCAACAGATATTTTGTTTGTTGGAGGCATTGATGAAACGATAGACGAAAAAAGTTTGTATGATATTTTTTCATCTTTTGGTGATATAAGGAATATTGAAGTACCATTAAATATGACTACAAAAAAAAATAGGGGTTTTGCTTTTGTGGAATATGTAGAAGTCGATGATGCAAAACACGCACTATACAATATGAATAATTTTGAATTGAATGGAAAAAGGATTCATGTCAATTATTCCAAGACCAAAAAAGCTGATCATTATAAGCCAATTTGGCTTGACGAAATGTATAATCAAGAAAAGATGAAGGAACTGGAAGAGGACGAGGAAAATTTAAATGATGATTCTTTAAAAGGGGACAGCTGA	MSDNNATDILFVGGIDETIDEKSLYDIFSSFGDIRNIEVPLNMTTKKNRGFAFVEYVEVDDAKHALYNMNNFELNGKRIHVNYSKTKKADHYKPIWLDEMYNQEKMKELEEDEENLNDDSLKGDS	125	0	null	no	GO_0003676	GO_0003723, GO_0003755	GO_0003676,GO_0003723,GO_0003755	0	0	0	0	0	0	0	0	0	0	0	0	0	0	0	0	0	0	0	0	0	0	0	0	0	0	0	0	0	0	0	0	0	0	0	0	0
3223	PF3D7_1136300	tudor staphylococcal nuclease	TSN	ATGGAAAGATTGAATGGTATTGTGAAACAAGTAATATCCGCAGATACCTATGTTTTAATAGGTGCCAAAAAAGGCGGAGTATCACAGGAAAGGCAAATAAATTTGGCCTGCTTACAATGCCCCAGATTGTTTATGAAAAGCCAAAATACAGAAAAGGTTGAAGAACCATTAGCATGGGAAAGTAGAGAATTTATTAGAAAAATGATTATAGGGAAGAATGTTAGTTTTTGTCTTGAATATACTTATAATAATCGACAATTTTGTAGTGTATTTTATGAAGAACAGAACCTTGGTATTTTATTATTGGAGAAAGGTTATGCTACATTGGTATCAAATAAAAATGTTAAGAGTAGTGTGTATGCTGATTTAGAACCTTATTATGTACAGGCCAAAGAAAGG…	MERLNGIVKQVISADTYVLIGAKKGGVSQERQINLACLQCPRLFMKSQNTEKVEEPLAWESREFIRKMIIGKNVSFCLEYTYNNRQFCSVFYEEQNLGILLLEKGYATLVSNKNVKSSVYADLEPYYVQAKERKVGIFGNNIKSYVRNIVYCYNDKNENKKVYDLFVNRRLKCVVEHIRDGANFRVYAEKEAANEKREVLVSTNNNNNNNNNNNSGEKNKKNKKNKNNNNNNNIDNTELNGMIEEDTGNSKKKMKNKNKKKTNEDENAESNLNPNEKYLTMYYFSFSLCGIIVDMFKKEMVDNEETVKEELYAMETKRFVESRLLNRDIEIEIKHIDNNFNLYANIYYKLGNICTLLLKSGYAYINEYTIKFVPNPIEYKKALDEAIQLRKKKWTNYTE…	1098	0	null	no	GO_0016788, GO_0003676	GO_0003723, GO_0005509, GO_0004518, GO_0005515	GO_0016788,GO_0003676,GO_0003723,GO_0005509,GO_0004518,GO_0005515	0	0	0	0	0	0	0	0	0	0	0	0	0	0	0	0	0	0	0	0	0	0	0	0	0	0	0	0	0	0	0	0	0	0	0	0	0
1082	PF3D7_0525600	RNA methyltransferase, putative	null	ATGATTATACATAATTTTTTTGTTTCTTCATTTCGACAGAAGGTTCATAACTTGAACATATTTAAAAGAAGAAATACGAAAATTTTATTTTATTCCACAATAAATTGCAATATCATTAACAATGAGATAACACCTAAGGAGGATAGTTTAAAACCTCACTGGATTAACATGGATAATAATAAAAAGCTTAAGAATAAATGTGTAGATGATGAGACTTATAAAAATGAAGAGGCAAACCTTCAGAATAATGAATATTTATATATATCTAAGAAATCTAGGATGATGAAATATATTATAAGATTACGAAAAAAAAAAAACTTTCGAAAAAAAAACAATTCATTTTTTGTTAAAGATTCTAATACAATTTTGCATTTATCAAAAAATAAGAATATACAATTT…	MIIHNFFVSSFRQKVHNLNIFKRRNTKILFYSTINCNIINNEITPKEDSLKPHWINMDNNKKLKNKCVDDETYKNEEANLQNNEYLYISKKSRMMKYIIRLRKKKNFRKKNNSFFVKDSNTILHLSKNKNIQFEAVLGTNKDILNNFKNKQCTKLYYINKDILNYIFSDTLNVRRQDKNDAVAIIKIPCLSNKINNIKFLLVLDRIRYAYNLGKILNVAYSFNIDCLYYTKHTADPYNPKVMEITKGTHLNIPHIFGNYQELEQLCKEHKLIPIVAHTKGQNIDTFFKKNKIKNNNINGICLILGSESTGPHTDVFKYAHPIQLPMHEMTNSLNVFVAASILIHYIKKCCL	351	0	null	no	GO_0003723, GO_0008173	GO_0003723, GO_0008173	GO_0003723,GO_0008173,GO_0003723,GO_0008173	0	0	0	0	0	0	0	0	0	0	0	0	0	0	0	0	0	0	0	0	0	0	0	0	0	0	0	0	0	0	0	0	0	0	0	0	0
1858	PF3D7_0810600	ATP-dependent RNA helicase DBP1, putative	DBP1	ATGACAAACATGAATTATAATAATAGCAATATGAACAGCGGATATAATAAAAATGAAGAAGGGAACTTATATGTAAGGAATAACTACGCAACGAATACAAATGATAATATAACTAATACCTATAATAAGGGTAATGTTGTTGCAGAGGATGGATCAACTAACAATTTTGTATATAACCAAATAAGAAATAGTAAAAGAGAAATGAACCATATGGTGTCAAATAGCAATAATGGAAGTAGAAATTATAGTGTTGAACATGTGAATCCTAATAATGAGAATGTAGGTTTAAACGATAACAATAATAATAATAATAATAATAGTAATAATAGTAATAATAATAATAATAATAATAACAACAACAATAATAATAATAATAGTAGTAGTAGTAATGCTGGTGTT…	MTNMNYNNSNMNSGYNKNEEGNLYVRNNYATNTNDNITNTYNKGNVVAEDGSTNNFVYNQIRNSKREMNHMVSNSNNGSRNYSVEHVNPNNENVGLNDNNNNNNNNSNNSNNNNNNNNNNNNNNNSSSSNAGVVRNVDNNRSYMNYVDKNNNPENMKNNFGNNKYYDNQGNNENNMMHDQMKGGLNVGGMNSFNNNNVNNLNNMQMENNRLMFDNNNNNNNNNIKRNNNYMNNNNNNNINNNNGRMEKPRYKPPMLRNQGNFNNNRNNFNRMNFNKGLGNNNFNNNSNNNNNNNNNNAFPRNYTIPQTAWATRDNRRYYPEKEEEIYSNVKSEKGVNFDLYNSIPVEISGFNSENVAAIETFDDPSLNLNELLLSNIKKVNYDKTTPIQKYSLNIIMNR…	941	0	null	no	GO_0005524, GO_0003676	GO_0003724, GO_0003729	GO_0005524,GO_0003676,GO_0003724,GO_0003729	0	0	0	0	0	0	0	0	0	0	0	0	0	0	0	0	0	0	0	0	0	0	0	0	0	0	0	0	0	0	0	0	0	0	0	0	0
1437	PF3D7_0629400	RNA-binding protein, putative	null	ATGAATGCAACTAGTAGGAATACTTTATTAGATGAAAATAAGAACATGAACAATTCATATAACACAAAAACCTTATGGGTAGGTGATTTAGAGAAGATTAAGGATGAGGTTGTTGACGAGAATTATATTTTATATTGTATGTTTTATGAATTTGCTGAGGATATAATAAGAATAAAATTATGTAAAGAAAAGAGCAATCAAAAAAATTCATATGCTTTTATAGAGTTTTCTACATATGAAGTAGCAAAATATTGTTTTGAGAAATTGAATGGAAAATGGATACCAGGAAAAGCTCATAGGTTTAAATTAAATTGGGCTAAGTATAATATGAGTGATAATATAACCACAAATGAAAAAGATTTAAATATTGAGATAGATGATAAAGGTACTTATTCTATA…	MNATSRNTLLDENKNMNNSYNTKTLWVGDLEKIKDEVVDENYILYCMFYEFAEDIIRIKLCKEKSNQKNSYAFIEFSTYEVAKYCFEKLNGKWIPGKAHRFKLNWAKYNMSDNITTNEKDLNIEIDDKGTYSIYVGSLPINTTKEEIENLFCNIYNSICFVKMIKNTQKSPHKIYCFIHFFNYDECLRALTEMNGYIFKGCKIKVSKSNGIKMNPSNINNNNNNNVNHNINHNVNNNNIVNNNNNMNAIYYNNKNFDGNMNNYHMNKNKGINTIRMNDDKKNGNKNYIYNGNNNNNNNNNNNINNNNNINNNNNNNNNIVNNNNNNVNNNNNNELSNHHSYELNFYDHMNSNVNTFPSHYSTHNGSTSSLLYGSNNFPTQLNHINQMNTMNQLNQMNTM…	780	0	null	no	GO_0003676	GO_0003729	GO_0003676,GO_0003729	0	0	0	0	0	0	0	0	0	0	0	0	0	0	0	0	0	0	0	0	0	0	0	0	0	0	0	0	0	0	0	0	0	0	0	0	0
2375	PF3D7_0929200	RNA-binding protein, putative	null	ATGAGCATAAAAAATAAGATAGATATGAGTTTAGATGAACTCATAGAAAAGGAAAATATAAAAGCAAATTTAAAAACCAATGAAAAAAAGACGGTAAATAAATTTATTGAAAAAAATACAGGTCAAAAATTTTTGCATAGTATTATAATATCCAATGTGAATAGCAAAAATTTAGAACTTTATAAAAAAGAGTTTAGTAAATTTGGGAAGATATATAATATCTATCATGATAATGAAAAAAAAATAACGTATGTTAAATATGATAATAAAAATTCCTGCGATACAGCAATAAGCACAATGAATAACCAGACAATTGATGGAGATACTATAACGATTATATTGGGTAAAAAGATCATAGATAAAAAAAACTCGAAAAACATAAACCAGAATAATGTTGTT…	MSIKNKIDMSLDELIEKENIKANLKTNEKKTVNKFIEKNTGQKFLHSIIISNVNSKNLELYKKEFSKFGKIYNIYHDNEKKITYVKYDNKNSCDTAISTMNNQTIDGDTITIILGKKIIDKKNSKNINQNNVVMNNNNNMHNNMNNNKIIQPYKMPMYNPNAYPPHPFYMNNNFAPYNNMPPANAYQNNFFDKNMALYNNSTKNIYDTHKNNTIIVTNVPTYLNAEDIFSAFQETGKIIDVQILMNEKRKLTGIVSIEYEKNESASDAVRMYDGGFLNDNRIRVFLDCR	289	0	null	no	GO_0003676	GO_0003729	GO_0003676,GO_0003729	0	0	0	0	0	0	0	0	0	0	0	0	0	0	0	0	0	0	0	0	0	0	0	0	0	0	0	0	0	0	0	0	0	0	0	0	0
4194	PF3D7_1330800	RNA-binding protein, putative	null	ATGGCGTTAAACATATTTAAGAAAAAAAAGTCTAAGGATAAAAAGGAAGAATTAAAAGATATCAAAGCAGATGATAGCAATGTTGATAATAAAGCCACCGAATCTACTGCTGTAGATTCTGAAGCCAAAATGGAGATCTCTAGTAAGGTGTCTGAAAAAAAGAAAACCAAGAAAAACGAAGATAAAAAGAAAAAGAAAAAAAAGGATGACACGTCAGAATCGTCCGACTCGTCAAGTGATAGTGATGATGATTCCGAAGAAGATAATAAAATTGAAATCAAAAATGAAAATAAAAAGGAAAATAAAAAGGAAAACAAAAATGAGAACAAAAATGAGAACAAAAATGAGAACAAAAATGAGAGCAAAAAGGAAAATAAAAAGGAAGTAAAAAAAGATGAT…	MALNIFKKKKSKDKKEELKDIKADDSNVDNKATESTAVDSEAKMEISSKVSEKKKTKKNEDKKKKKKKDDTSESSDSSSDSDDDSEEDNKIEIKNENKKENKKENKNENKNENKNENKNESKKENKKEVKKDDSSSDSDSSSDSDDSDDSDSDEVEEKKEKESDKVVKPSNNTHKVVEKKKAETKSDSDSDSDSDSDSDSDSDSDSDSDDDDDEEKDEKKETGKNKEEVTKKKEGAKANSDSDSDSDSDSDSDSDSDSDSDSDSDEAKEQKEDDKLKTNKGKSTHNLEVTEEKNDLNGVEGKNKRKNINVEENKKGKNKKQKLGNNVETENMNENNMNFQDDGNFGNEKGEYILTMLNISRDTTDVDIRSFLKDYLDTDYSEDTIYIHINMYNNSAYIY…	596	0	null	no	GO_0003676	GO_0003729	GO_0003676,GO_0003729	0	0	0	0	0	0	0	0	0	0	0	0	0	0	0	0	0	0	0	0	0	0	0	0	0	0	0	0	0	0	0	0	0	0	0	0	0
1985	PF3D7_0823200	RNA-binding protein, putative	null	ATGTCATTAACAAATTCAAGTAAAATTTTTATTGGAAGTATACCTAAAGATGTAACGGAGGAAGAGCTAAAAACTGAGGCAGCGAAGTATGGTACCATAACACAAGTTTATTACGTACCAGCTACGGCTCAGAGTCCAAGAGGATGGGCATTTATTACATACGAGCAAAGGTCTGAGGCATATAAAGCAATTGAAGCTTTAGACTATAAATGTATTTTTCCAAATAGTCAAAGGCCATTAGATGTAAGATTTGCAAGTTATAAATATAATAATTCAAATGATGCTCAAGGAGGAAATAAAAATGTATGGCAAAAACATGTGACAACAGATGGTCATCCATATTATTATAATTCAGTAACAGGACATTCACAATGGGAAAAACCAAAAGAAATGTCCGCA…	MSLTNSSKIFIGSIPKDVTEEELKTEAAKYGTITQVYYVPATAQSPRGWAFITYEQRSEAYKAIEALDYKCIFPNSQRPLDVRFASYKYNNSNDAQGGNKNVWQKHVTTDGHPYYYNSVTGHSQWEKPKEMSATNFPGKGSAPSFGPPGANVFVFHLPSHWTDMELYQHFQHFGYVVSARIQRDANGRNKGYGFVSFNNPESALNAIKGMHGFYVSGKHLKVQLKKGEEHYVQMNTPAQPQLTPAQPYSVQQPIIGNHHQPYMTHLMYGGMDSPNQMRYNTYSISR	286	0	null	no	GO_0003676, GO_0005515	GO_0003729	GO_0003676,GO_0005515,GO_0003729	0	0	0	0	0	0	0	0	0	0	0	0	0	0	0	0	0	0	0	0	0	0	0	0	0	0	0	0	0	0	0	0	0	0	0	0	0
3707	PF3D7_1236100	clustered-asparagine-rich protein	CARP	ATGAATAACGAAATCGTAAATTCCACAATCGATGGGGTCCTGAATACAAAATTGCATATACAAAACATTCCTCCACATATTACGGATGTACATTTAAGGTCATTATTGGGTAATGTTGGATTTATTAAAGACATATGTTATTTTAATAAAAGCAAAAAACAAATGAACAATAATAACTTTGCTAATAAGAAGATTTATAACACTGCTTTGGTTACATTTAATACACATGAAGAGGCCTTAAATGTTTTGAAAAATATTAAGAACTTAATCGATACAAGTGGAGAAGAAAGAAATATTGATGCTAAGTTTGCTGTTCCAAATGTAAGTATTAACAATAACAATAATAATAATAATAGTAATACCTTTTTTCAGAAAAATAATATGAACAATACCAACTTT…	MNNEIVNSTIDGVLNTKLHIQNIPPHITDVHLRSLLGNVGFIKDICYFNKSKKQMNNNNFANKKIYNTALVTFNTHEEALNVLKNIKNLIDTSGEERNIDAKFAVPNVSINNNNNNNNSNTFFQKNNMNNTNFSQGSTNYGSNYNSENFQGNNNMNNYNFYNNNSSNNNNNNQTNTQNNFMNRNMKNKNMNNNNNNNNSNNNMMMNMNFNNNQQMNNNPMLNQNNFMLNNNNNYNNNAKNVNDMYRDGEMSPNHLNNNNNNINNNNNNNNNNNNNNNNNVMFRQNNSHLAQMYQANDNSLEDVENVDGLSLWEMYKDKNNNIFYYNNLTKHSQWHKPVHPNKLFQYNNNEKTKQNGPSGSNLFIFHIPSEWTDLDLFQHFCCFGNIISSKIQRDSTGRN…	445	0	null	no	GO_0003676, GO_0005515	GO_0003729	GO_0003676,GO_0005515,GO_0003729	0	0	0	0	0	0	0	0	0	0	0	0	0	0	0	0	0	0	0	0	0	0	0	0	0	0	0	0	0	0	0	0	0	0	0	0	0
4684	PF3D7_1409800	CUGBP Elav-like family member 2, putative	CELF2	ATGAGTTATTTGAGCAACATGAGCAATATGAATAATATGAATAACAGCACACAACAATATAACAACGAGAACAGCGAGAGTCCTTATGGAGAGGCAAGAATGAGTGAGCAATGTTCATATCAAATGAATAGTCCATATAACCCAGCACCATCGATACCTATTAAATTGTTTGTAAGTTCAATACCTAAAAATTTAACAGAAGAAGATATAAAATCAATTTTTCAGGAATATGGAAATATACAGGATGTTGTATTCATAAAGGATAAGAAGCCTAATGTGAATAGGTCAAATGTGTTTGTTCGTATGGAATCAATATTTTATGGACAAAAGGCTATAAAGGATTTACATGGAAAGAGAACTTTATGTGAAACCTTAGGGCCATTGATTGTTAAGTTTGCT…	MSYLSNMSNMNNMNNSTQQYNNENSESPYGEARMSEQCSYQMNSPYNPAPSIPIKLFVSSIPKNLTEEDIKSIFQEYGNIQDVVFIKDKKPNVNRSNVFVRMESIFYGQKAIKDLHGKRTLCETLGPLIVKFAIGELEKYGVNMNNANENEAKLFVGSLPKEITEEELRELFNRYGNVTEVYIMKNSNGISKRCAFVNYAYKEQGIFAIQNMNGKIATENAEKPIEVRFAETKNQLQEKHLFNRSLMNPLNNNMNNMDNMNNMDNMENMDNFDNNNNNNNSSYMQSHAFKNMNMDNFNRYSMNMNFNMQNNNNNQRNNNNNNNGNNNNDNNNNNNINNNNSNGNNNNNSSSNNNSPWKQYYSKEEGRPYYHNEITGETQWQKPRKIEQSFINPINMNEI…	514	0	null	no	GO_0003676, GO_0005515	GO_0003729	GO_0003676,GO_0005515,GO_0003729	0	0	0	0	0	0	0	0	0	0	0	0	0	0	0	0	0	0	0	0	0	0	0	0	0	0	0	0	0	0	0	0	0	0	0	0	0
4102	PF3D7_1321700	splicing factor 1	SF1	ATGGAAGAGAACTCATATTTTGAGGCAGTAGAAAAACTTTTTGAAATTAAAAATTCAAAAGAAGATAAAATAAATGGAAGTAGTAGTAATAAGGATGAATTAATTGAAAATAAAGAATTAAAAAATGATAACTTGAATAATAATACTTGTGATAGTGATAAAAAGAAAACAAACAAAAGAGAAGTCAAAAGAAAAAGTAAAGTTATCAATGATAATAAAATAGATAATGAAAACAAAAATACAAAAAGGAAAAAAAAAACAAATGGTGATGTCGATATAAATATAGATGAAAATTTTGATGAAGATAATGATGAAAATGTTGATAAAAATGTTGATAAAAATGTTGATAAAAATGTTGATAAAAATGATGATGAAGATGATGGTGAAGATGATGGTGAA…	MEENSYFEAVEKLFEIKNSKEDKINGSSSNKDELIENKELKNDNLNNNTCDSDKKKTNKREVKRKSKVINDNKIDNENKNTKRKKKTNGDVDINIDENFDEDNDENVDKNVDKNVDKNVDKNDDEDDGEDDGEDDGEDDGEHDGEDDGEDDSDEDKHENIPKNKADTLKEESDVSDNHHNNRKSKNIKNSIRSKSSNSKTKKEDDDNNIHCNNSSQENEQKRKEQLLENKDNKKEGKNTNSSKVKKRYHTSSDENDRNNDNTSSEEERTKSRKKKHKNDNSDKKNENRVVDYSSSSSSSSDASNEYSSSDEERDHKKRKIRKTNRSRRISRSSSESNSSTDNDKRGTSRSSEEKVYSKYDKMKRRDRERERDRDRDRDRDRDRDRDRDRDRDRDRDRDR…	864	0	null	no	GO_0003723, GO_0003676	GO_0003729	GO_0003723,GO_0003676,GO_0003729	0	0	0	0	0	0	0	0	0	0	0	0	0	0	0	0	0	0	0	0	0	0	0	0	0	0	0	0	0	0	0	0	0	0	0	0	0
1013	PF3D7_0518700	mRNA-binding protein PUF1	PUF1	ATGTATATTTGTTTGTATAACATATTTTATTTTATATGTAGCAAAATGGAAAATACGAAAAGGAAGGAAAATGATAATTGCAAGGAATATGCGTTAAATATAAGTTCAAAAACTAACAAGGAAAAATATAAATATGAAGGGAAAAAAAAAGATGAAAAGAAAAAAAAGGATGAAGGGGAATACACAAATGATGATAACAAATATGTGAATGATGAGAACAAATATGTGAATGATGATAACAAATATGTGAATGATGAGAACAAATATGTGAATGATGAGAACAAATATGTGAATAATGATAACAAATATGTGAATAATGATAACAAATATGTGAATAATGATAACAAATATACATATGATGAAAATACGAAAAAGGATAAAGTAGATATAAATATAGAT…	MYICLYNIFYFICSKMENTKRKENDNCKEYALNISSKTNKEKYKYEGKKKDEKKKKDEGEYTNDDNKYVNDENKYVNDDNKYVNDENKYVNDENKYVNNDNKYVNNDNKYVNNDNKYTYDENTKKDKVDINIDIYNDDNQSYNNKKQKNDDDDISHNKHKNGDDKIDNIDNIDNNIEKGDNNICNFYDKRNEDNNTYADCNNIVEGINNNFECSGKKCNYIDKQRDKTKKYDIINMKCDNKCSNNMKNSTKNKMNTQTNNNKDMLSNQIRMCSKNINNNYIYNNNNNNNSIISSNYYYNYYNNTNMYNELNMVHNEKNNLIDILDKELKKNCNNYNIGNNNMNCNYKPNYNYFINKDLLNNNMTYIYNYPMMNTLNYSKDNNYCTYLDEINRINECTYN…	1894	0	null	no	GO_0003723, GO_0005488	GO_0003729	GO_0003723,GO_0005488,GO_0003729	0	0	0	0	0	0	0	0	0	0	0	0	0	0	0	0	0	0	0	0	0	0	0	0	0	0	0	0	0	0	0	0	0	0	0	0	0
2937	PF3D7_1107300	polyadenylate-binding protein-interacting protein 1, putative	PAIP1	ATGCAGAGTGACATAATTGTTAATCAAGATTTAAAAGAATACAGCAACATGATGAAAGGAATACACCATGTAAAGTCTTGTGTTTCCTCCTTAGGAGTTGAGACTAATATGAAAAATGAATACAACGAAAAGGTTGTAGAAAGGAATGATTATAATAATAATATTGAAGATGAAACTTATGATAATAATAATATTAATATTAATAATAATAATAATAATAATGATAATAATGATAATAAGGATGAATTGTTAAATTCTTCTAATGATTTAATAAATGAGAAAAAAAATAAAAAGAATAAAAAAAATAGTTATGATGATAGTATATTATGTAATAATAGGGGTTCAATAAATGATGAAAATTTAGATATCCCTAATAATTGTGATACTAGTCATAATAAT…	MQSDIIVNQDLKEYSNMMKGIHHVKSCVSSLGVETNMKNEYNEKVVERNDYNNNIEDETYDNNNININNNNNNNDNNDNKDELLNSSNDLINEKKNKKNKKNSYDDSILCNNRGSINDENLDIPNNCDTSHNNNNNSIHGDNNVFEKRNNSQDVHSSSILKNSEDLILNKSSNNSNNENVYSNEDMYSYKENLCEQQNNDETNNMFPSKINMDNCNINNNYSNNNSSSNSSRSYNESKKSSKDENNNNDNDNRDNNNNNNNNNNNNGNNANNGNNGNNGNNNNNNNNGNNGNNGNNNNEGNDNNDDNKNNDENKNNNKEVSDDKDKDEHDEKGSNENKNLSHNNNNNNNNNGSSSNNNNNLNGDNKKNEGNKKNETSSIKSLHKSSVLSSLNADAPEFV…	3334	0	null	no	GO_0003723, GO_0005488, GO_0005515	GO_0003729	GO_0003723,GO_0005488,GO_0005515,GO_0003729	0	0	0	0	0	0	0	0	0	0	0	0	0	0	0	0	0	0	0	0	0	0	0	0	0	0	0	0	0	0	0	0	0	0	0	0	0
2684	PF3D7_1021900	PHAX domain-containing protein, putative	null	ATGACATTAGAGAAAAGTTTAGATCAAGAAAAAAACAAAACAGAAATAGAAAATACTGGAAGTAAGAGTATACCTAATGATAGTAATGAAGGTGCGAATAATAAAGTAGATAAGAATGATGGAAATGAAAATGTAATGAAAAAAAATGAGGGCGATAAAAATAAGGTATATAATGGTACGGCTGATAATAATAAAGTAGATAATAACAAAGTAGATAATAACAAAGTAGATAATAATAAAGGAGATAATAACAAAGTAGATAATAATAAAGGAGATAATAATAAAGTAAATAATAATAAAGGAGATAATAACAAAGTAGATAATAACAAAGTAGATAATAACAAAGTAGATAATAACAAAGTAGATAATAACAAAGTAGATAATAATAAAGGAGATAAT…	MTLEKSLDQEKNKTEIENTGSKSIPNDSNEGANNKVDKNDGNENVMKKNEGDKNKVYNGTADNNKVDNNKVDNNKVDNNKGDNNKVDNNKGDNNKVNNNKGDNNKVDNNKVDNNKVDNNKVDNNKVDNNKGDNNKVDNNKGDNNKVDNNKVNNNKVNNNKLVNNKVFNNKFNNNNIKNNRDNNKHTKNNRADYHKVENTQIHISNKFQGNGKGYNMNYINKKDANHEKGYKNNYENNRSLSYFYSKKNYNEHFMPVNNVPFKKRGSDLYNNSKKESANDYTNDNQMNNNTKNNNQLNNNIKNNNKLNNTTKNNNQSNNNTKNNTTKNNNQINKNYNKNTKLNEQVEQREKNANLSLKNNEEKQVENVKNINKNNYSGSKNAWIKNEGTNNMNRTCKSGI…	2290	0	null	no	GO_0005515	GO_0003729	GO_0005515,GO_0003729	0	0	0	0	0	0	0	0	0	0	0	0	0	0	0	0	0	0	0	0	0	0	0	0	0	0	0	0	0	0	0	0	0	0	0	0	0
43	PF3D7_0105200	RAP protein, putative	null	ATGAGAATTTTAAAGAACGCAGTAAATAAGTGTAATTTATTTTTGCAGAACACGAGGAGGCCTGTTAGTAATATTTCGAGCTTAAAAATGTTAGGGGAAATATACAGTAAAAAGAATTGTTTACCTGTACGTATTAATAATAACATATTAAAAGAATCCATTTTGTGTAGAAATGTATCTACAAATATTATGGAAAAGAAGAATGATAGTTTAGAAGAGCAGATGAGTAATGATGATATAATAAAATTTTTTGAAGAGAACAAGAATATGAATATTGATAAATTATATAATTTAATAAAAAATTTGAGTAGAAAAAGAATTGAAGACAGAAAGAAAATAGTAGATAATGAGAAATTTATAAATATTATTGAAGAAATAGAAAATCGTATTAGTATTATG…	MRILKNAVNKCNLFLQNTRRPVSNISSLKMLGEIYSKKNCLPVRINNNILKESILCRNVSTNIMEKKNDSLEEQMSNDDIIKFFEENKNMNIDKLYNLIKNLSRKRIEDRKKIVDNEKFINIIEEIENRISIMNTRYLCNFSLRLVSLSINNDDIKRILTKISEHVLKKMNVNPRDLVGICYSLSLCNNMNEYFFEHIKKETISNIDAYTPTLLTQLLESMRLSQNLDVELTNLIVEKMCEEIDRFTTKDVTLALKTLSMAGIPRGFLIRRLCNLVFDNISHFHHTSLINIIYNLTKLKFTTASHIDVIYKNVEENLENCNVTTLCELLYTFYMNEINEEHKINRIFENIKYEQFNTTKTAILIDFIHAATYYNKYIEKEKLFSLIDLLFKRAIPKSLT…	568	0	null	no	GO_0005524	GO_0003729	GO_0005524,GO_0003729	0	0	0	0	0	0	0	0	0	0	0	0	0	0	0	0	0	0	0	0	0	0	0	0	0	0	0	0	0	0	0	0	0	0	0	0	0
1826	PF3D7_0807100	ATP-dependent RNA helicase DHH1, putative	DHH1	ATGAGTAATGAACCCGTTTCCTTGATTTCCCTAAACAAAATGCTTAGAAAGAATAAAGAGGAAGAAAAACATAAAAATGTAGACAATACAGAGCTTACGAATCTTGTGTTAAATACATCTAATTATAATAAGAAGGAAGAAAAAGGAACCTTTGAAGAATTAAATGTATCCATAGAAATAATACGAGCATTAAAAAGAATAAATATTTATTATCCTTCAGTAATACAATATATGATTATGAAAAAATTAATATGTAAGGATAAAAAGGAGAAAAAAAGAAATTGTATAATACAATCAAGAAATGGAACAGGTAAAAGTATGTCGATTTGTATAATTATTATTAATCAAATATTTTGTAAAATGAAGAAGAAAAAAGAAACTGAACAAAATAATAAAAAT…	MSNEPVSLISLNKMLRKNKEEEKHKNVDNTELTNLVLNTSNYNKKEEKGTFEELNVSIEIIRALKRINIYYPSVIQYMIMKKLICKDKKEKKRNCIIQSRNGTGKSMSICIIIINQIFCKMKKKKETEQNNKNKKEEIGKIDYSKYVSDHISQSISDNENIFFGFLFFYGLILEPTRELCQQVYDNIKKITNILRNEDDEDIYDNKNGLDVYNNICTNRCEKKYVNYYKIKSLILYGGTDIFESIKTLFYNFPHIIISTPGRLKHVLNILNKVKIEINKEDKITNKGIYPLSYITIINICLNYFILDEIDALLDEQFDEQLKIIYNYIVNPKIQILCYSSTFQDACINNFIQKVIECDERYVARLQRVHMSNMDHTNYKDDGNDYLKMGLDNEQQHCGK…	1321	0	null	no	GO_0005524, GO_0003676	GO_0003729	GO_0005524,GO_0003676,GO_0003729	0	0	0	0	0	0	0	0	0	0	0	0	0	0	0	0	0	0	0	0	0	0	0	0	0	0	0	0	0	0	0	0	0	0	0	0	0
2565	PF3D7_1010600	eukaryotic translation initiation factor 2 subunit beta	eIF2beta	ATGGAAGATAAAGTTGAAGATGCTGGATCAGCTTTTGTTGATTTAGATAAAATAGTAAATGATGATTCGAAACAGTTATTTGATTTTGGTGAGAAGAAAAAGAAAAAGAAGAAGAAAGAGGTTGTAGAAAAGGTAGAAGAGATTATTATAGATGGTACAGGGAAAGTTTTTGAAAGAGGAGCTGTATATCCATATGATGAATTATTACATCGAATTCAAGATTTAATTAATAAACATAACATAGATTTATGTATATCTAAAAAATATACTATTAAACCCCCACAAGTAGTTCGAGTTGGATCAAAAAAAGTAGCATGGATTAATTTTAAAGATATATGTACTATTATGAATAGAAATGAAGAACATGTTTTCCATTTTGTTTTAGCAGAATTAGGAACT…	MEDKVEDAGSAFVDLDKIVNDDSKQLFDFGEKKKKKKKKEVVEKVEEIIIDGTGKVFERGAVYPYDELLHRIQDLINKHNIDLCISKKYTIKPPQVVRVGSKKVAWINFKDICTIMNRNEEHVFHFVLAELGTEGSIAGEGQLVLKGKYGPKHIEALLRKYITEYVTCQMCKSPNTTMEKDSRTRLFHQHCNACGAKRSVTTIKSGFHALGRGERRKAKHTN	222	0	null	no	GO_0003743	GO_0003729, GO_0005515, GO_0003743	GO_0003743,GO_0003729,GO_0005515,GO_0003743	0	0	0	0	0	0	0	0	0	0	0	0	0	0	0	0	0	0	0	0	0	0	0	0	0	0	0	0	0	0	0	0	0	0	0	0	0
3591	PF3D7_1224300	polyadenylate-binding protein, putative	PABP	ATGATTGCTACTGGTACAAATATGATGCACCCCAGTTTTTCAACTGCTTCCCTTTATGTTGGAGATTTGAATGAAGATGTTACAGAAGCTGTATTGTATGAAATATTTAACACCGTTGGTCATGTATCTTCTATAAGAGTATGTCGTGATAGTGTAACAAGAAAATCATTAGGTTATGCATATGTGAATTATCATAACTTAGCTGATGCAGAGAGAGCTTTAGATACCCTTAACTATACAAATATAAAAGGGCAACCAGCAAGATTAATGTGGAGTCATAGAGATCCATCCTTAAGAAAGAGTGGAACAGGAAATATTTTTGTAAAGAATTTGGATAAATCAATAGATAATAAAGCATTGTTTGATACATTTAGTATGTTTGGAAATATATTATCATGT…	MIATGTNMMHPSFSTASLYVGDLNEDVTEAVLYEIFNTVGHVSSIRVCRDSVTRKSLGYAYVNYHNLADAERALDTLNYTNIKGQPARLMWSHRDPSLRKSGTGNIFVKNLDKSIDNKALFDTFSMFGNILSCKVATDEFGKSKSYGFVHYEDEESAKEAIEKVNGVQLGSKNVYVGPFIKKSERATNDTKFTNLYVKNFPDSVTETHLRQLFNPYGEITSMIVKMDNKNRKFCFINYADAESAKNAMDNLNGKKITDDGQIDETYDPKKEEATASTSGAANQTTGTDADKTDKNDKNNKADKNEKGDSSNANNNATATGATTTDTTTTPGETTTTTANADSTGANNNNGLSPNTNTSNTTTGSSNNSINLNENNNTAGNNNSTNNNNNSGSSMNNAGS…	875	0	null	no	GO_0003723, GO_0003676	GO_0003729, GO_0008143	GO_0003723,GO_0003676,GO_0003729,GO_0008143	0	0	0	0	0	0	0	0	0	0	0	0	0	0	0	0	0	0	0	0	0	0	0	0	0	0	0	0	0	0	0	0	0	0	0	0	0
2528	PF3D7_1006800	single-strand telomeric DNA-binding protein GBP2, putative	GBP2	ATGTCGATGGAAAATAATAGCCCAAGCAAAGGTTGTAGAGTGTATGTTGGAAATTTACCCTGGAAGGTTACGTGGCCAATTTTAAAAAATCACATGAAAAAGGCAGGAGATGTTGTAAGAGTTGATATTTTTGAAGATACACAAGGAAGATCAAAGGGTTGTGGTATTGTTGAATATGCTACATACGAAGAAGCTCAAGAAGCAATCAGCAGCTTGAACGATTCAAAGTTGGAAGATCGCCTAATTTTCGTGAGGGAAGATAGAGAAGAAAATTCTGGTAATTTCGAAAAGAGAAAATTCAACAACGTAAGAAAAGATAAATTTTACGAGTCAAGGAGAAGAAGAGATTATGACTACAGGAAGGAATACAGAAGGGATGATTACAGAAGAGATTTTAGA…	MSMENNSPSKGCRVYVGNLPWKVTWPILKNHMKKAGDVVRVDIFEDTQGRSKGCGIVEYATYEEAQEAISSLNDSKLEDRLIFVREDREENSGNFEKRKFNNVRKDKFYESRRRRDYDYRKEYRRDDYRRDFRRDEFRRGGGEFRRDYRRDEFRRGGGEFRRSSKRNCTLIVYNLPPQVTWKELKDLFRKHGRVVRADLKNEDNSSKELIGVVIMENEYEAKNAIDALNFCNFDGYILKVNYENNE	246	0	null	no	GO_0003676	GO_0003729, GO_0043047	GO_0003676,GO_0003729,GO_0043047	0	0	0	0	0	0	0	0	0	0	0	0	0	0	0	0	0	0	0	0	0	0	0	0	0	0	0	0	0	0	0	0	0	0	0	0	0
1100	PF3D7_0527300	methionine aminopeptidase 1a, putative	METAP1a	ATGTCTTTTTTAAATAAAAGTTTGATGTTGAATTTTTTAAATACCTTTCCAAAAAAAGGAAAATTTCAACATACTTATATATTAACACCAAAATTAAATAAATCGAAATTACCTGAACGTAAAACATTTAAACCAACCCTACAAGATGGCAAATATAAGGTAACAGCTAGCCAAAAAGTTCCCGAACATATAAAATGCCCAAGTTATGCTAAAACAGGAATTGTACAAAATTCGAATATTAATTATGAAATTAAGGATGACAAATATATAGAAAAGATGAAAAAAGCTTGTAAACTAGCTTCTGAATGTTTAAAGTTATGTTTAGAAAATTCAAAAGAAGGGATAACAACAGATATTATTGATAATATGGCATATGATTTTTATATAAAAAATAATGCA…	MSFLNKSLMLNFLNTFPKKGKFQHTYILTPKLNKSKLPERKTFKPTLQDGKYKVTASQKVPEHIKCPSYAKTGIVQNSNINYEIKDDKYIEKMKKACKLASECLKLCLENSKEGITTDIIDNMAYDFYIKNNAYPAGLNFHSFPKSICASPNEVVCHGIPNLRKLQRGDIITYDCTVFLDGVFGDCAGTVGIGEISERHKKLMDVSKECLYKAISICRDGQLFSEIGRIITEHANKNGFNVIKDFCGHFIGTHMHMYPLIEHHYPNSHNNHRMKKGQIFTIEPILSEGSINIYTWKDKWTVCTNDNSFCSQWEHTILVLDNYAEILT	327	0	null	no	GO_0004177, GO_0008235	GO_0003729, GO_0070006, GO_0008235	GO_0004177,GO_0008235,GO_0003729,GO_0070006,GO_0008235	0	0	0	0	0	0	0	0	0	0	0	0	0	0	0	0	0	0	0	0	0	0	0	0	0	0	0	0	0	0	0	0	0	0	0	0	0
3122	PF3D7_1126200	40S ribosomal protein S18, putative	RPS18	ATGTCACTACAAGTAATAGATAATAATGATTTTCAACATATATTAAGAATTTTAAATACAAATGTAGATGGTAAAGAAAAAGTAATTATTGCCTTAACAGCTATTAAAGGTATTGGAAAGAGAATGGCAACTGTTATATGTAAACAAGCAAATGTTGACCCCACGAAAAGAGCAGGAGAATTAACTACTGAAGAAATAGATAATATCGTACATATTATGAGTACTCCTACCCAATTTAAAATCCCTGATTGGTTTTTAAACAGGAGAAAGGATTTGAAAGAAGGAAAAAATATTCATGTTATTGCTAACCAACTTGATTCTTACTTACGTGAAGATTTAGAAAGAATGAAGAAAATTAGATTACACAGAGGTTTACGTCATCACTGGGGATTAAGAGTT…	MSLQVIDNNDFQHILRILNTNVDGKEKVIIALTAIKGIGKRMATVICKQANVDPTKRAGELTTEEIDNIVHIMSTPTQFKIPDWFLNRRKDLKEGKNIHVIANQLDSYLREDLERMKKIRLHRGLRHHWGLRVRGQHTKTTGRRGRTVGVAKKKGA	156	0	null	no	GO_0003723, GO_0003676, GO_0003735	GO_0003735	GO_0003723,GO_0003676,GO_0003735,GO_0003735	0	0	0	0	0	0	0	0	0	0	0	0	0	0	0	0	0	0	0	0	0	0	0	0	0	0	0	0	0	0	0	0	0	0	0	0	0
1658	PF3D7_0721600	40S ribosomal protein S5, putative	null	ATGGAAACAACAACGGCTGATATAAAACTTTTTAAAAAATGGTCATATGAAGAGATCAATATTGCTGACTTATCTTTGGTGGATTGTATAGCTGTATCACAAAAGGCATGTGTTTATACACCACATACCGCTGGACGTTATCAAAAGAAAAGGTTTAGAAAGGCCTTATGTCCAATTGTAGAAAGATTGGTTAATTCTATGATGATGCATGGAAGGAATAATGGAAAAAAATTAAAAGCAATAAGAATCGTAGCTTATGCTTTTGAAATTATTCATTTAATGACAGGAGAAAACCCTCTACAAGTTTTTGTAAATGCAGTACAAAAAGGTGGACCCAGAGAAGATTCAACAAGAATTGGATCAGCAGGTGTTGTTAGAAGACAAGCAGTTGATGTTTCT…	METTTADIKLFKKWSYEEINIADLSLVDCIAVSQKACVYTPHTAGRYQKKRFRKALCPIVERLVNSMMMHGRNNGKKLKAIRIVAYAFEIIHLMTGENPLQVFVNAVQKGGPREDSTRIGSAGVVRRQAVDVSPLRRVNQAIYLICTGARNAAFRNIKSISECLAEEIINCANESSSSYAIKKKDEIERVAKANR	195	0	null	no	GO_0003723, GO_0003735	GO_0003735	GO_0003723,GO_0003735,GO_0003735	0	0	0	0	0	0	0	0	0	0	0	0	0	0	0	0	0	0	0	0	0	0	0	0	0	0	0	0	0	0	0	0	0	0	0	0	0
2027	PF3D7_0827500	apicoplast ribosomal protein L21 precursor, putative	null	ATGTTTTTTTTTTCGAGTAAAAATAAATCATTTTTGCTATGGGCAAGTTTTATGCTTATATATTTTACTAACATATCAATATACGTAAGCAAAATACATCATCATGGTTTGAATAAAAAAATATATAATTTAAATTTTGTGAGTAATGTATTTAAGTATAATGCAAGAAGGAGAGGTAATTCATTAAATGTTTTAATCAATTCTCCAGCACAAGTAAAATTATCCGAAATGGAAGATGCTAAAGATAGAAGTGGGAAATATTGTATTATAGAAATATGTGGGAAAATTAGATGGGTAGAAGAAGGTCGGTTTTATGATGTATTTAGAATAAAACAAGAAGAAAATAGAAATATATATTTGAATAGAATTTTATTTTATAGTAATGAAGAGGGGAATATA…	MFFFSSKNKSFLLWASFMLIYFTNISIYVSKIHHHGLNKKIYNLNFVSNVFKYNARRRGNSLNVLINSPAQVKLSEMEDAKDRSGKYCIIEICGKIRWVEEGRFYDVFRIKQEENRNIYLNRILFYSNEEGNIFFGRPFLDNVRIHATVLNHFRGHKIYRLKYKPKKNYKRFYGHRQEMTRIKINKIEYNNELLGQEKRIYNFFKDDSLYYILNRIHNIVRPSLELKHLKKNFIEYINSFCSLKFETFYKHKGNYKKEKMLRNILKTKKLSKRPEVIEEVKKIEEEKKKQRLTKCDPLDDFDPVVNEFMIKEHFYS	316	1	HMM: MFFFSSKNKSFLLWASFMLIYFTNISI, NN: MFFFSSKNKSFLLWASFMLIYFTNISIYVSK	yes	GO_0003723, GO_0003735	GO_0003735	GO_0003723,GO_0003735,GO_0003735	0	0	0	0	0	0	0	0	0	0	0	0	0	0	0	0	0	0	0	0	0	0	0	0	0	0	0	0	0	0	0	0	0	0	0	0	0
2918	PF3D7_1105400	40S ribosomal protein S4, putative	RPS4	ATGGGTAAAGGTATTAAAAAACACTTAAAAAGGGTGAATGCCCCCTCCCACTGGATGTTGAATAAAATGGGTGGTCAATATGCCCCCAAGACGAGCAGTGGACCACATAAATTACTTGAGAGTATTCCTTTAGTAATATTGTTAAGAAATCGTTTGAAGTATGCCTTAACTTTTGATGAAGTAAAGATGATATTAATTCAGAAGATTGTGAAAGTTGACAATAAGGTAAGAACTGATTGTACATTTCCAGTTGGTTTGATGGATGTGATTCACATAACAAAATCGAATGAATATTTCCGTCTTTTATATGACATTAAGGGAAGGTTTGTACCACATAGAATAACAAATGAGGAGAGTAAATATAAATTATGCAAGGTAAAAAAAATATTATTAAGGAAA…	MGKGIKKHLKRVNAPSHWMLNKMGGQYAPKTSSGPHKLLESIPLVILLRNRLKYALTFDEVKMILIQKIVKVDNKVRTDCTFPVGLMDVIHITKSNEYFRLLYDIKGRFVPHRITNEESKYKLCKVKKILLRKGRLSIAVTHDGRSIPYIHPDVKVNDTVRLDLETGKVLEHLKFQVGSLVMVTAGHSVGRVGVISSIDKNMGTYDIIHVKDSRNKVFATRLSNVFVIGDNTKPYISLPREKGIKLDIIEERRNRLKALNN	261	0	null	no	GO_0003723, GO_0003735	GO_0003735	GO_0003723,GO_0003735,GO_0003735	0	0	0	0	0	0	0	0	0	0	0	0	0	0	0	0	0	0	0	0	0	0	0	0	0	0	0	0	0	0	0	0	0	0	0	0	0
4062	PF3D7_1317800	40S ribosomal protein S19	RPS19	ATGGAGGATGCAAATAAGCCCAAGAAGAGAACCTTTCGTACCTTTCAATATAGAGGTGTTGATTTAGATAAGTTATTAGACTTAAGCCAAGATGAACTTATAAAATTATTTAAAGCAAGACAAAGAAGAAAGTTCCAAAGAGGAATAAGCAAGAAAGCTAAATCACTTTTAAAAAAAATTAGAAAATCTAAAAAAAATTGTGAACCAGGAGAAAAGCCAAATCCTGTCCCTACCCATTTAAGAAATATGACCATCATACCAGAAATGGTAGGATCTATTGTAGCTGTACATAATGGTAAACAATATACGAATGTAGAAATTAAACCAGAAATGATTGGTTATTATCTTGGTGAATTTTCAATTACTTATAAACACACAAGACATGGAAAACCAGGTATT…	MEDANKPKKRTFRTFQYRGVDLDKLLDLSQDELIKLFKARQRRKFQRGISKKAKSLLKKIRKSKKNCEPGEKPNPVPTHLRNMTIIPEMVGSIVAVHNGKQYTNVEIKPEMIGYYLGEFSITYKHTRHGKPGIGATHSSRFIPLK	145	0	null	no	GO_0003723, GO_0003735	GO_0003735	GO_0003723,GO_0003735,GO_0003735	0	0	0	0	0	0	0	0	0	0	0	0	0	0	0	0	0	0	0	0	0	0	0	0	0	0	0	0	0	0	0	0	0	0	0	0	0
4985	PF3D7_1441200	60S ribosomal protein L1, putative	null	ATGAGCAAGTTGAATCAAGATTTACTTAAAAAAGCCATTTCCGACGTATTTGAAGGAACCAAACAAAAAAAGAGAAAATTTGTAGAAACAATTGAACTCCAAATAGGTTTAAAGGATTATGATACTCAAAGAGATAAACGTTTCTCAGGTACCGTAAGGTTATCTAATGAAGTTCGTAAGAAGTTAAAAGTATGTATTTTAGGAGATGCTGTACATGTAGAAGAAGCTCAAAAATTAGAATTAGATTATATGGACATTGAAGCTATGAAAAAATTAAATAAAGATAAAACTCTTGTTAAGAAACTAGCCAAAAAGTATGATGCATTTTTAGCAAGTCAGGTTATATTACCTCAAATTCCTAAATTACTTGGTCCAGGTTTAAATAAGGCAGGTAAATTT…	MSKLNQDLLKKAISDVFEGTKQKKRKFVETIELQIGLKDYDTQRDKRFSGTVRLSNEVRKKLKVCILGDAVHVEEAQKLELDYMDIEAMKKLNKDKTLVKKLAKKYDAFLASQVILPQIPKLLGPGLNKAGKFPSLITHNDKINDKILELKSSIKFQLKKVLCMGVPVGHANLKEEELRSNIVHAINFLVSLLKKNWQNIRTLHIKSTMGKPQRIYG	217	0	null	no	GO_0003723, GO_0003735	GO_0003735	GO_0003723,GO_0003735,GO_0003735	0	0	0	0	0	0	0	0	0	0	0	0	0	0	0	0	0	0	0	0	0	0	0	0	0	0	0	0	0	0	0	0	0	0	0	0	0
5042	PF3D7_1447000	40S ribosomal protein S5	null	ATGGAAGATAGAGGAGGTTTTTCAAGAGGTTTTGGAAGAGGTGTTAGAGGAACTCGTGGAAGAGGCGGCAGAGGAGCACGAGGAAGAGGAAGAGGCTCTGCAGAAGATGATTTAAAAAATTGGGTTCCTGTAACCAAGTTAGGTAGATTAGTAAAAGAAGGAAAGATAGTTTCTATTGAAGAAATATATTTACATTCATTACCAATAAAGGAATATCAAATAATAGATTATTTCTTTCAACCTAATGAATGTTCTCATCCTTTAAAAGATGATGTTGTAAAAATAATGCCAGTACAAAAACAAACAAGAGCTGGTCAGAGAACCAGATTTAAAGCATTTGTTGCTATTGGTGATGGTAATGGTCATTGTGGTTTAGGTGTAAAATGTGCAAAGGAAGTA…	MEDRGGFSRGFGRGVRGTRGRGGRGARGRGRGSAEDDLKNWVPVTKLGRLVKEGKIVSIEEIYLHSLPIKEYQIIDYFFQPNECSHPLKDDVVKIMPVQKQTRAGQRTRFKAFVAIGDGNGHCGLGVKCAKEVATAIRGAIISAKLSLIPVRRGYWGNKIGDPHTVPMKVSGKCGSVRIRLVPAPRGTQIVGAPTTKKMLNFAGIKDCFSSSCGKTKTKGNFLRAIFNALSKTYGYLTPDLWKVTNFDKSPYEEWSDFLETYQNLKGIKGTV	272	0	null	no	GO_0003723, GO_0003735	GO_0003735	GO_0003723,GO_0003735,GO_0003735	0	0	0	0	0	0	0	0	0	0	0	0	0	0	0	0	0	0	0	0	0	0	0	0	0	0	0	0	0	0	0	0	0	0	0	0	0
5232	PF3D7_1465900	40S ribosomal protein S3	null	ATGTCAGCTCCTATTTCAAAAAAGAGAAAGTTTATTAATGATGGTGTTTTTCAAGCCGAGTTAAATGAATTTTTAGCTCGTATTTTGGCAGAAGATGGATATTCAGGTGTTGAAGTTAGGGTTACACCTATAAGAACGGAGGTTATTATAAGAGCCACTCGTACTAGAGAAGTTCTTGGAGATAAAGGAAGGAGAATACGTGAATTAACATCATTAGTACAAAAAAGATTCTTTAATAAATCAACAAATAGTGTTGAATTATTTGCTGAAAGAGTAGAACATAGAGGATTGTGTGCAATGGCACAAGCCGAATCTTTAAGATATAAATTATTAAAAGGATTAGCAGTAAGAAGAGCATGTTATGGAGTTTTAAGACATATAATGGAATCTGGTGCTAAA…	MSAPISKKRKFINDGVFQAELNEFLARILAEDGYSGVEVRVTPIRTEVIIRATRTREVLGDKGRRIRELTSLVQKRFFNKSTNSVELFAERVEHRGLCAMAQAESLRYKLLKGLAVRRACYGVLRHIMESGAKGCEVIVSGKLRAQRAKSMKFRDGYLISTGEPSKRFVNTATRSAQLKQGVLGIKVKIMLPTAIDTRTGLTSILPDNISVLEPKTDTVDL	221	0	null	no	GO_0003723, GO_0003735	GO_0003735	GO_0003723,GO_0003735,GO_0003735	0	0	0	0	0	0	0	0	0	0	0	0	0	0	0	0	0	0	0	0	0	0	0	0	0	0	0	0	0	0	0	0	0	0	0	0	0
3186	PF3D7_1132700	50S ribosomal protein L2, putative	mRPL2	ATGAATGGATTGCAGTTTTTATTACGAATTAATAAAAATATTATAAGACGATTTTCAAGTTTGTATTCTCCAAATATAAAGAAGAATGTGCCTGATTATATAGATTTCGAAACATTTTACCCTAAAAAAGAAATAAAGCCAGATATTATGACAGCTTTTACTATGGCCAAACAACAACGATTAGAAAAGCTGTTGGAAAATAATCCTTTGGTATTATACAAGGGTAGGGTTATAAAAAAATTATCATGTCCAAGAATAAAAAATTCAGGAAGAAACAATGTAGGAAAAATAACTGTTCGTCATAGAGGTGGAGGTCATGCCCAGAGATTACGATTTATTGATTTTAAAAGATCAAGAAAAGATATATATAGCACTGTATTACGAATAGAATATGACCCA…	MNGLQFLLRINKNIIRRFSSLYSPNIKKNVPDYIDFETFYPKKEIKPDIMTAFTMAKQQRLEKLLENNPLVLYKGRVIKKLSCPRIKNSGRNNVGKITVRHRGGGHAQRLRFIDFKRSRKDIYSTVLRIEYDPSRSAHIALIQYEDGVLSYILAPLLLRPGDKIIASKYANINPGNSLPLQNIPVGSIIHNIEMRPGAGGQLIRAAGTYATIISKDNEYATIKLKSTEIRKFPLQCWATIGQVSNLERHMRILGKAGVNRWLGKRPVVRGVAMNPSKHPHGGGTSKKHTKRPKCSLWGICRDGYKTRSKKKPLGLIIRRNICGRLQKKYGVKS	333	0	null	no	GO_0003723, GO_0003735, GO_0016740	GO_0003735	GO_0003723,GO_0003735,GO_0016740,GO_0003735	0	0	0	0	0	0	0	0	0	0	0	0	0	0	0	0	0	0	0	0	0	0	0	0	0	0	0	0	0	0	0	0	0	0	0	0	0
1026	PF3D7_0520000	40S ribosomal protein S9, putative	RPS9	ATGCCAAAAAGTTACAGGAATTATTCTAAAACAGCAAGGAATCCAAAACGTCCATTTGAAAAGGAACGTTTAGATCAGGAATTAAAATTAATAGGTGAATATGGATTAAAAAATAAAAGAGAAATATGGAGAGTTCAATACTTATTAGCCAAAATAAGATCAGCTGCAAGGTACTTATTAACCTTAGATGAAAAGAGCTCTAAAAGAATATTTCAAGGAGAAGCTTTATTAAGAAGAATGGTTCGTCAAGGTTTATTAGGAGAAAATGAAGAAAAGTTAGATTACGTTTTAGGTTTAACTTTGCCAAAATTATTAGAGAGGAGATTACAAACTAAAGTTTTTAAACTTGGATTAGCAAAATCTGTACATCATGCAAGAGTATTAATAAGACAAAGACAT…	MPKSYRNYSKTARNPKRPFEKERLDQELKLIGEYGLKNKREIWRVQYLLAKIRSAARYLLTLDEKSSKRIFQGEALLRRMVRQGLLGENEEKLDYVLGLTLPKLLERRLQTKVFKLGLAKSVHHARVLIRQRHIRVGKQMVDIPSFLVRVDSEKHIDFATTSPFGGARPGRVKRKSLKKQKEKTEAEAE	189	0	null	no	GO_0003723, GO_0019843, GO_0003735	GO_0003735	GO_0003723,GO_0019843,GO_0003735,GO_0003735	0	0	0	0	0	0	0	0	0	0	0	0	0	0	0	0	0	0	0	0	0	0	0	0	0	0	0	0	0	0	0	0	0	0	0	0	0
234	PF3D7_0210100	60S ribosomal protein L37ae, putative	null	ATGTCAAGAAGAACTAAAAAGGTCGGTTTAACAGGAAAATATGGTACCAGATACGGATCATCATTACGTAAACAGATAAAAAAAATTGAATTAATGCAACATGCCAAGTATTTATGTACCTTCTGTGGAAAGACTGCCACAAAAAGAACTTGTGTAGGAATATGGAAATGTAAAAAATGTAAAAGAAAAGTTTGTGGAGGTGCTTGGAGTTTAACCACCCCAGCTGCTGTTGCTGCTAAATCAACGATTATTAGATTAAGAAAACAAAAAGAAGAAGCCCAAAAATCTTAA	MSRRTKKVGLTGKYGTRYGSSLRKQIKKIELMQHAKYLCTFCGKTATKRTCVGIWKCKKCKRKVCGGAWSLTTPAAVAAKSTIIRLRKQKEEAQKS	96	0	null	no	GO_0003735	GO_0003735	GO_0003735,GO_0003735	0	0	0	0	0	0	0	0	0	0	0	0	0	0	0	0	0	0	0	0	0	0	0	0	0	0	0	0	0	0	0	0	0	0	0	0	0
275	PF3D7_0214200	mitochondrial ribosomal protein L13 precursor, putative	null	ATGATAAGAAGAAGCTTGATTAAATTAGGAGGATATCCCAAGGCATCTTTTCATGAACAGCACATTAACCCTTTTTCAAATGTACAATGGCAGAGTTATCCATTTTTAAAGAAGAATATGCCCAAGGTTGATATTTTTTCAGAAGAACATATTTCAAAGTGTGCTTTAAGCGTTTTTGATAAAGAGAAAGGTAACTGGTTTGTAATAGACGCTACAAATAAAAGTGTAGGAAGTTTAGCTGCATGCATTAGTAAATTATTACAAGGAAAATATAGAGTTGATTACAATCCTAATAAAGTTAATAGTAGTAGTGTTATTGTTGTAAATGCTATACATGTGAAGTTTTATGGACATACATGGGATACCAAAATTTATAAATTCCCAAGAAAAAGTCATTCA…	MIRRSLIKLGGYPKASFHEQHINPFSNVQWQSYPFLKKNMPKVDIFSEEHISKCALSVFDKEKGNWFVIDATNKSVGSLAACISKLLQGKYRVDYNPNKVNSSSVIVVNAIHVKFYGHTWDTKIYKFPRKSHSKSHKILSCKTVFARNPSMILNLAVKRMLPNNRLRQIFYRKLYVYPGALHPHWGIPQVVVPKKNVVKKEEQQDIKTFTIL	212	0	null	no	GO_0003735	GO_0003735	GO_0003735,GO_0003735	0	0	0	0	0	0	0	0	0	0	0	0	0	0	0	0	0	0	0	0	0	0	0	0	0	0	0	0	0	0	0	0	0	0	0	0	0
312	PF3D7_0217800	40S ribosomal protein S26	RPS26	ATGCCAAAGAAACGTAGAAACGGAGGAAGGTCCAAACATAACAGAGGACATGTAAATCCTTTAAGATGTTCGAATTGTGGAAGATGTGTTCCTAAGGATAAAGCTATAAAAAGATTCAACATAAGAAATATTGTAGATACATCAGCACAAAGAGATATTAAAGAAGCATCTGTATATTCTACTTTTCAATTACCTAAATTATATATTAAACAATGTTACTGTGTATCATGTGCTATCCATTCACGTTTTGTTCGTGTAAGATCAAGAGAACAAAGAAGAGTAAGAAAAGAAACAGCTAAACATGTTAACCCATCCCAATTATAA	MPKKRRNGGRSKHNRGHVNPLRCSNCGRCVPKDKAIKRFNIRNIVDTSAQRDIKEASVYSTFQLPKLYIKQCYCVSCAIHSRFVRVRSREQRRVRKETAKHVNPSQL	107	0	null	no	GO_0003735	GO_0003735	GO_0003735,GO_0003735	0	0	0	0	0	0	0	0	0	0	0	0	0	0	0	0	0	0	0	0	0	0	0	0	0	0	0	0	0	0	0	0	0	0	0	0	0
323	PF3D7_0219200	40S ribosomal protein S30	null	ATGGGAAAGGTACATGGATCATTAGCAAGAGCTGGTAAAGTTAAAAACCAGACTCCTAAAGTCCCAAAGTTAGATAAGAAAAAACGTTTAACAGGAAGAGCTAAAAAAAGGCAACTTTATAACAGAAGATTTTCAGATAATGGAGGTAGAAAAAAAGGACCTAATTCAAAAGCTTAA	MGKVHGSLARAGKVKNQTPKVPKLDKKKRLTGRAKKRQLYNRRFSDNGGRKKGPNSKA	58	0	null	no	GO_0003735	GO_0003735	GO_0003735,GO_0003735	0	0	0	0	0	0	0	0	0	0	0	0	0	0	0	0	0	0	0	0	0	0	0	0	0	0	0	0	0	0	0	0	0	0	0	0	0
397	PF3D7_0304400	60S ribosomal protein L44	RPL44	ATGGTGAATGTTCCAAAAACAAGAAAAACATATTGTAGTAACAAATGTAAAAAACATACAATGCATAAAGTCAGTCAATATAAAAAAGGAAAAGAAAGATTATCATCATTAGGAAGAAGAAGATATGACATGAAACAAAAAGGTTTTGGAGGTCAAACAAAACCAGTTTTTAAGAAGAAAGCTAAAACTACTAAAAAAATTGTTCTTAAATTAGAATGTACCAAATGTAAAAAAAAAAGATTTCAAACCATGAAAAGATGTAAAACTTTTGAAATGGGAGCTGATAAGAAAAAGAAGGGAGGAGCAGTATATTGA	MVNVPKTRKTYCSNKCKKHTMHKVSQYKKGKERLSSLGRRRYDMKQKGFGGQTKPVFKKKAKTTKKIVLKLECTKCKKKRFQTMKRCKTFEMGADKKKKGGAVY	104	0	null	no	GO_0003735	GO_0003735	GO_0003735,GO_0003735	0	0	0	0	0	0	0	0	0	0	0	0	0	0	0	0	0	0	0	0	0	0	0	0	0	0	0	0	0	0	0	0	0	0	0	0	0
422	PF3D7_0306900	40S ribosomal protein S23, putative	null	ATGGGATCAGGAAAACCAAGTGGATTAAGGGCAGCAAGGAAATTAAGAATCAGAAGAAGAACCCAAAGATGGGCTGATAAAAGTTACAAAAAATCTCACCTTGGTACTCGTTGGAAGTCCAACCCTTTCAGAGGAAGTTCTCACGCCAAGGGAATTGTTGTTGAAAAGGTTGCTATAGAAGCAAAACAGCCCAACTCTGCTTACCGTAAATGTGTTAGAGTTCAATTAATTAAAAACGGAAAAAAAATTACAGCATTCGTACCAGGAGACGGTTGTTTAAATTTCATCGATGAAAATGACGAAGTTTTAGTCTCAGGATTTGGTAGAAGTGGTCACTCAGTTGGTGATTTGCCTGGTGTTAAATTTAAAGTAGTAAAAGTCGCAAGGGTTTCTTTATTA…	MGSGKPSGLRAARKLRIRRRTQRWADKSYKKSHLGTRWKSNPFRGSSHAKGIVVEKVAIEAKQPNSAYRKCVRVQLIKNGKKITAFVPGDGCLNFIDENDEVLVSGFGRSGHSVGDLPGVKFKVVKVARVSLLALFKEKKEKPRS	145	0	null	no	GO_0003735	GO_0003735	GO_0003735,GO_0003735	0	0	0	0	0	0	0	0	0	0	0	0	0	0	0	0	0	0	0	0	0	0	0	0	0	0	0	0	0	0	0	0	0	0	0	0	0
477	PF3D7_0312800	60S ribosomal protein L26, putative	null	ATGAAGTTTAACAAACAAAAATCATCTTCCCGAAGGAAAATGAGGAAAGCTCATTTTACTGCACCCGCAGGTCTAAGAAGAAAAATAATGTCATCAAAATTATCAAAAGAATTAAGATTAAAATATAAGACACGATCGTTGCCCGTTAGAAAAGATGATGAAGTTCTTATATGCAGAGGACACAACCATGGAAGAGAAGGAAAAGTTGTAAAAATAAACAGAAAAAGATATAAGATTTATGTAGAAAGAGTTACAAGAGAAAAAGTAAATGGAGAATCAACATTTATTGGTATTCATCCAAGTAATGTTGTATTAACAAAATTAAAGGTTGATAAAAATCGTAAAAAAATTTTAGATAGAAAAGCAGCAAAGGAAAATTAA	MKFNKQKSSSRRKMRKAHFTAPAGLRRKIMSSKLSKELRLKYKTRSLPVRKDDEVLICRGHNHGREGKVVKINRKRYKIYVERVTREKVNGESTFIGIHPSNVVLTKLKVDKNRKKILDRKAAKEN	126	0	null	no	GO_0003735	GO_0003735	GO_0003735,GO_0003735	0	0	0	0	0	0	0	0	0	0	0	0	0	0	0	0	0	0	0	0	0	0	0	0	0	0	0	0	0	0	0	0	0	0	0	0	0
520	PF3D7_0316800	40S ribosomal protein S15A, putative	null	ATGGTACGTATGAGCGTTTTAGCTGACTGTTTAAAAACCATAAACAATGCCGAGAAAAGAGGAAGGCGACAAGTTTTAATAAGACCCTCCTCAAAAGTTGTAATTAAATTTTTACAATATATGCAAAAGAAAGGATATATAGGAAGTTTTGAAATAGTCGATGATCATAGATCTGGAAAAATTGTTGTGAATTTGTTAGGAAGAATAAACAAATGTGCCGTTATATCGCCAAGATATGATGTTAAGCTTGATGAAATCGAGAAGATTATTACGAGCATATTACCCAGTAGACTTTTTGGTCATTTAATTTTAACAACACCCTACGGAATTATGGATCACGAAGAAGCTAGAAGAAAACACACCGGAGGAAAAGTGTTAGGTTTCTTCTTTTAA	MVRMSVLADCLKTINNAEKRGRRQVLIRPSSKVVIKFLQYMQKKGYIGSFEIVDDHRSGKIVVNLLGRINKCAVISPRYDVKLDEIEKIITSILPSRLFGHLILTTPYGIMDHEEARRKHTGGKVLGFFF	130	0	null	no	GO_0003735	GO_0003735	GO_0003735,GO_0003735	0	0	0	0	0	0	0	0	0	0	0	0	0	0	0	0	0	0	0	0	0	0	0	0	0	0	0	0	0	0	0	0	0	0	0	0	0
528	PF3D7_0317600	40S ribosomal protein S11, putative	RPS11	ATGGCAACAACATTAGATGTTCAACATGAGAGAGCTTACCAAAAACAAGAAGGAGCAAGTTTTTTTAACTCCAAGAAAATAAAGAAAGGCTCCAAGAGTTATATAAGATACTGGAAAAAGGTTGGATTAGGATTCGCTACCCCTAAAGAAGCCAAGGAAGGTGTTTATGTAGATAAGAAATGCCCATTCACTGGAAATGTATCAATTAGGGGAAGAATATTGAAAGGTATGGTTATTTCAAACAAAATGAAGAGAACTATTATAATTAGAAGAAACTATTTACACTATGTCAAGAAATATAACAGATTTGAAAAAAGACATAAAAATATTCCATGCCACTGTTCTCCATGTTTTGACGTAAAGGAAGGTGACATAGTAACAGTTGGTCAATGCAGGCCA…	MATTLDVQHERAYQKQEGASFFNSKKIKKGSKSYIRYWKKVGLGFATPKEAKEGVYVDKKCPFTGNVSIRGRILKGMVISNKMKRTIIIRRNYLHYVKKYNRFEKRHKNIPCHCSPCFDVKEGDIVTVGQCRPLSKTVRFNVLHVEKHQIFGSARKQFVLF	161	0	null	no	GO_0003735	GO_0003735	GO_0003735,GO_0003735	0	0	0	0	0	0	0	0	0	0	0	0	0	0	0	0	0	0	0	0	0	0	0	0	0	0	0	0	0	0	0	0	0	0	0	0	0
581	PF3D7_0322900	40S ribosomal protein S3A, putative	RPS3A	ATGGCAGTAGGAAAAAATAAAAGAACATCTAAGGGAAAAAAAGGTGGAAAAAAAAAAGTTACTGATGTTTTTACCAAAAAAGAATGGTATGACTTAAAGGCCCCAAAAATGTTTTTGGTCAGGAATTTTGGTAAAACCTTAGTCACAAAAACGATAGGAAAAAAATTGGCCACTGATAGTTTGAAGGGAAGAATTTACGAAGTAAACTTGGCCGACCTAAACAACGATGAAGATCAAGCCCATAAGAAAATCAAATTAAGTTGTGATCACATCATCAACAGAGATTGTTATACCGACTTTTGCGGATTAAGTATAACCAGAGATAAATTATGCTCTTTAATTAGAAAAGGATATACGTTAATAGAAGGACATACAGATGTAAAAACCTTAGATAATTAC…	MAVGKNKRTSKGKKGGKKKVTDVFTKKEWYDLKAPKMFLVRNFGKTLVTKTIGKKLATDSLKGRIYEVNLADLNNDEDQAHKKIKLSCDHIINRDCYTDFCGLSITRDKLCSLIRKGYTLIEGHTDVKTLDNYHLRMFCIAFTKKRQNQTKSTCYAQTSQIKKIRKKMVDIMTAEASKVLLKDLVKKFIPESIGKEIEKQCKKIYPLQNVLIRKVKILKRPKLDISKLMELHTDPKEESGKNVNALPESKEATNILTAELKH	262	0	null	no	GO_0003735	GO_0003735	GO_0003735,GO_0003735	0	0	0	0	0	0	0	0	0	0	0	0	0	0	0	0	0	0	0	0	0	0	0	0	0	0	0	0	0	0	0	0	0	0	0	0	0
708	PF3D7_0412100	30S ribosomal protein S12, mitochondrial, putative	null	ATGTTTTTTACCTTATCCAATAAGTTTAGTTATAAAAAAGGTACCCATGTAATTGTAAAATGTAATCCTTTTATTATAAATAATTTTTTCTTTAAAAAATGGATATATAAAATACCATATGATAAGAGTGAATTAATTTTTTCAAAAATGAAAAATGGGATAATCGGGGAAAATAAATATAATAACATATGTAGTAATCCTTTGTTAGAAGATAATCGTATTATAAGTATATCATATATGCATGATGATAAAATAATGAAAAATAAAACCCAAATAACAAACAATAATAATAATAATAATGATAATTATATTAATAATAATAATAATAATAATAATGGTATATTTATTAGTACACATACATCTTATCATTCCTATTTGTTCAACAGTGTAAAACGTTCA…	MFFTLSNKFSYKKGTHVIVKCNPFIINNFFFKKWIYKIPYDKSELIFSKMKNGIIGENKYNNICSNPLLEDNRIISISYMHDDKIMKNKTQITNNNNNNNDNYINNNNNNNNGIFISTHTSYHSYLFNSVKRSFSTKNIRGRLFYKRRPKQIPKLKKKNWRSKWLEGAPQKRGICLKVRVQTPKKPNSGLKKIARVRLSTGRIVSVYIPGIGHNLNTHSIILVRGGRCKDIPGCNYKAIRGVYDLLPVKNRFRGRSKYGVKLSEDKRKHLLERYNFKHITIKKDRDEFNKYKWFNYVDKDKKLREKPLDPEENVPINIFHFNTYYRNKKFQQNSDA	336	0	null	no	GO_0003735	GO_0003735	GO_0003735,GO_0003735	0	0	0	0	0	0	0	0	0	0	0	0	0	0	0	0	0	0	0	0	0	0	0	0	0	0	0	0	0	0	0	0	0	0	0	0	0
742	PF3D7_0415900	60S ribosomal protein L15, putative	null	ATGGGAGCTTATAAGTACATTCAAGAAATATGGAAAAAAAAGCAATCTGATGCTATGCATTTTTTGTTAAGAGTTAGAACATGGGAATATAGGCAACTCCCTGTTGTTCATAGAGTATCCAAACCCAGTAGACCAGATAAAGCACGTCGCTTAGGATATAAGGCCATACAAGGATTTGTGATTTATAGAGTACGTGTTAGAAGAGGTGATAGAAAAAAAAGAGTTAAAAAAGGTATTGTGCACGGGAAACCCAAACACCAAGGTGTTCACAAACAAAAATCAACAAGAAATTTAAAAAGTGTAGCTGAAGGAAAAGTTGGAAAAAGTATATGTGGAAATTTACGTGTTTTAAATAGTTATTGGGTAGGTCAAGATGCTGTTTATAAATATTATGAAGTT…	MGAYKYIQEIWKKKQSDAMHFLLRVRTWEYRQLPVVHRVSKPSRPDKARRLGYKAIQGFVIYRVRVRRGDRKKRVKKGIVHGKPKHQGVHKQKSTRNLKSVAEGKVGKSICGNLRVLNSYWVGQDAVYKYYEVILVDPNHNAVRNNPKINWICNPVHKHRELRGLTSAGKKYRGLRVKGHLSAKSRPSIRANWKRRQLIKLRKCR	205	0	null	no	GO_0003735	GO_0003735	GO_0003735,GO_0003735	0	0	0	0	0	0	0	0	0	0	0	0	0	0	0	0	0	0	0	0	0	0	0	0	0	0	0	0	0	0	0	0	0	0	0	0	0
802	PF3D7_0422400	40S ribosomal protein S19	RPS19	ATGGCTGAACAATTTACCGAAGATATTGGTGTTGTAAACAAAAGGTTGTTAGAACCAGTACCTTTTGTAAAAACAAATAATTGTATAAAAGATGTAGATGCAGATTTATTTATTAGATCATATGCGACTCACTTAAAATTACATAACAAAATAACATATCCTAAATGGTGTACCTTTGTGAAAACAGGAAAGGGTAGGAAATTAGCACCTTTAAATGAAGATTGGTATTTCATAAGAGCATCAAGTATTTTAAGAAGATTATATTTACATCCAGATATAGGAGTAGGATTTTTAAGAAGGCAATTTAGTTCTAAGCAAAGAAGAGGAGTAGCACCTAATCATACAAGTTTGGCTAGTGGAAAAATATTGAGATCGATTTTACAACAACTTGAAAATTTA…	MAEQFTEDIGVVNKRLLEPVPFVKTNNCIKDVDADLFIRSYATHLKLHNKITYPKWCTFVKTGKGRKLAPLNEDWYFIRASSILRRLYLHPDIGVGFLRRQFSSKQRRGVAPNHTSLASGKILRSILQQLENLGYVEQNPKKKGRRLTTKGENAINNFARYINKKVYNKE	170	0	null	no	GO_0003735	GO_0003735	GO_0003735,GO_0003735	0	0	0	0	0	0	0	0	0	0	0	0	0	0	0	0	0	0	0	0	0	0	0	0	0	0	0	0	0	0	0	0	0	0	0	0	0
861	PF3D7_0503000	50S ribosomal protein L28, apicoplast, putative	null	ATGCAAATCACAAATAAAATATATAAATTAATAAAATATGTATATATATTATATATAATTATTCACTCCAACTTTATATTTCCAAAAGTCATATTGACTCAGATTAATAAAAATAAAACGAATAATATATTAAAATATCCGAATTATTTTTATGTAATATCTTTATATAGAAAAAATGTAAGGTTTAAGAATAATAATGTTCTTAACAAGTCAGTTACCAAATTTGCTCTCAATACAAAAAAAAGGCACAAAGAAGCTTTAGCGATAAGAAAATATAGGATGACAGGACCCTCATCCATTAAAAAACATTATGGATTTGGAGCACATAAGAGAATTAACAAAGTCACCATGTTACCACACAAAGAAATAAAATTACCAATAAGAAGGTGCGCTATATTG…	MQITNKIYKLIKYVYILYIIIHSNFIFPKVILTQINKNKTNNILKYPNYFYVISLYRKNVRFKNNNVLNKSVTKFALNTKKRHKEALAIRKYRMTGPSSIKKHYGFGAHKRINKVTMLPHKEIKLPIRRCAILGKMDNWNARKISKSGVRTHRIQRLNLINKRIFFEEENRFIKMKVSAKGLKTIKKYGLAYCIKKFNLDFSKKKYDAGYSSRRRKKKTQELNQTNSERTNVTNENTQQSVEEVDKIMDKLNLDDKKIHKDL	262	1	null	no	GO_0003735	GO_0003735	GO_0003735,GO_0003735	0	0	0	0	0	0	0	0	0	0	0	0	0	0	0	0	0	0	0	0	0	0	0	0	0	0	0	0	0	0	0	0	0	0	0	0	0
868	PF3D7_0503800	60S ribosomal protein L31	RPL31	ATGGTTAAAGGTACTGTAAAAAAACAGAAGAAAACTTTAAAACCAGTTACTAAATTTATTACCATAAATTTGAGTAAATTAACTCATAAAGTATGCTATAAAAGAAAGGCACCAAGAGCCATTAAAGAAATTAGGAGCATAGCAGGAAAACTTATGCACACTAAGGATGTACGTTTAGATGTAAAATTAAACAAATTTATATGGTCTAAAGGTGTTAGAAACCCACCAAAAAGAGTTCGTGTAAAATTAGAAAGAAAAAGAAATGAAGATGAAGATTCAAAGGAAAAGATGTATACTATTGTTGAACATGTAATGGTAGATTCATATAAAGGTTTAGTTAATGAATGTGAAGCAAACGAATAA	MVKGTVKKQKKTLKPVTKFITINLSKLTHKVCYKRKAPRAIKEIRSIAGKLMHTKDVRLDVKLNKFIWSKGVRNPPKRVRVKLERKRNEDEDSKEKMYTIVEHVMVDSYKGLVNECEANE	120	0	null	no	GO_0003735	GO_0003735	GO_0003735,GO_0003735	0	0	0	0	0	0	0	0	0	0	0	0	0	0	0	0	0	0	0	0	0	0	0	0	0	0	0	0	0	0	0	0	0	0	0	0	0
900	PF3D7_0507100	60S ribosomal protein L4	RPL4	ATGGCTACCATAAGACCTGTTGCAAATGTTTATAGTACAAATGGAAAGAACGTCGTTGGCGAAGTAGAAATACCAGTCGTTTTTCAAACCCCAATTAGAAATGACTTAATACAAAGCGTATATACAAATATGTCAAAAAATAGGAGGCATCCATATGCTGTTAAATTAGGTGCTGGATATGAAACATCGGCTGAATCATGGGGTACTGGTAGAGCAGTAGCAAGAATTCCAAGAGTTCCAGGTGGAGGTACTCATAGAGCTGGTCAAGGTGCTTTTGGAAATATGTGTAGAGGTGGTGGTATGTTTAACCCAACAAAAATATGGAGAAGATGGGGAAGGAAAGTTAATTTGAAAGAAAAGAGATATGCCGTATGTTCATCTATTGCAGCTAGTGGTGTA…	MATIRPVANVYSTNGKNVVGEVEIPVVFQTPIRNDLIQSVYTNMSKNRRHPYAVKLGAGYETSAESWGTGRAVARIPRVPGGGTHRAGQGAFGNMCRGGGMFNPTKIWRRWGRKVNLKEKRYAVCSSIAASGVTSLVLARGHRISHLKEVPLVVSNDIESLSKTKEAVNFLVSLGLKDEVNRLVKSKKIRAGKGKMRNRKYKIRNGPLIIYENDNGVKKAFRNIPGVDLCKVTKLNLLKLAPGGSIGRLCIWSESAFKKLDVIYGKIHEKKVTKKNYILPKSIVHNPDIYRIIHSDKVQASLLAKKKPCKKRLQNKNSLTNFAVRCRLNPAYKLLRSLAVLRMRKSILEKSKNKKEKRVQKQIQKKELQKINHDYYKGVAKAVKKKKKREEKKAKSKKT…	411	0	null	no	GO_0003735	GO_0003735	GO_0003735,GO_0003735	0	0	0	0	0	0	0	0	0	0	0	0	0	0	0	0	0	0	0	0	0	0	0	0	0	0	0	0	0	0	0	0	0	0	0	0	0
995	PF3D7_0516900	60S ribosomal protein L2	RPL2	ATGGGAAGAGTTATAAGAGGTCAAAGGAAGGGTAGAGGCTCTATTTTCAAGTCTCATAATCATCATAGAAAGGGCGCAGCAAAATTACGCCATTTAGATTATTGTGAAAAAAAAGGATATATAAAGGGTTTGGTAAAGGATATCATACATGACCCAGGAAGAGGTGCTCCTTTAGCCAAGGTAATATTTAAAAGAACAGAAAAGTATGGAAAGAAAGAAGAATTAATTATAGCTTCAGAAGGTATGTTTACTGGTCAATATATTTCATGTGGTACGAAAGCCCCCTTATCAGTAGGTAATATTTTACCTATTGGAAAAATGCCTGAAGGTACCTTAATATGTAACTTAGAACATAGAACAGGAAATAGAGGAACCTTAGTAAAAGCTTCCGGATGTTAT…	MGRVIRGQRKGRGSIFKSHNHHRKGAAKLRHLDYCEKKGYIKGLVKDIIHDPGRGAPLAKVIFKRTEKYGKKEELIIASEGMFTGQYISCGTKAPLSVGNILPIGKMPEGTLICNLEHRTGNRGTLVKASGCYATVVGQSEDGKKTKVRLPSGAKKTIDAKARAMVGVVGAGGRIDKPILKAGVAHHKYRVKRNCWPKVRGVAMNPVEHPHGGGNHQHIGHPSTVSRSAPAGQKVGLIAARRTGLLRGAKKTKLVGKSEE	260	0	null	no	GO_0003735	GO_0003735	GO_0003735,GO_0003735	0	0	0	0	0	0	0	0	0	0	0	0	0	0	0	0	0	0	0	0	0	0	0	0	0	0	0	0	0	0	0	0	0	0	0	0	0
1051	PF3D7_0522500	50S ribosomal protein L17, apicoplast, putative	RPL17	ATGAAGATATGGATATTATTTTTTTTGTTTTGTAAGAGCGTGTTGAATTTTAAATTGAAACAAAATGTGTCAAATATTTATATAATGAATAGAGAGCCCTTAAAATATATATCAAATAAAAGAAATACTTCATTATTGGCACATACAAATAAAAATTTCAGGAAATTAGGAAGGGATAGAGCTCAAAGGAGAGCTCTTCTAAGGGCATTAACAACTAGTTTACTGAGGTATGGTAAAATAGTAACGACTGAAGCAAAAGCAAAGGAGACTAGAAGAAAAGTTGATAGAATAATAACATATGCTAAAAAGCATGATAACAATAGGCAGTACGCTTATAGATTGATAGCTAATTATGTTTATGATAGAGAATTGGCCCTTAACGTAGTTAAACAGGCCCCT…	MKIWILFFLFCKSVLNFKLKQNVSNIYIMNREPLKYISNKRNTSLLAHTNKNFRKLGRDRAQRRALLRALTTSLLRYGKIVTTEAKAKETRRKVDRIITYAKKHDNNRQYAYRLIANYVYDRELALNVVKQAPVRYKERHGGYTKIKLLPKSRKGDASRMAMLELL	166	0	HMM: MKIWILFFLFCKSV, NN: MKIWILFFLFCKSVLNF	yes	GO_0003735	GO_0003735	GO_0003735,GO_0003735	0	0	0	0	0	0	0	0	0	0	0	0	0	0	0	0	0	0	0	0	0	0	0	0	0	0	0	0	0	0	0	0	0	0	0	0	0
1072	PF3D7_0524600	50S ribosomal protein L12, apicoplast, putative	null	ATGAAAAGTGTAGGAAGTAAAGTTACTAAATTGATAGGAAAGATATTATGTAAAAACGAAAAGAAAAATAGAAGAAGAAAAAATAATAAGACGAAAGATTGTTCATTATTTTTTATAATAAAAAAACAAAGTTGTCCATTGTTATATATTATTTTGTCCATATTATATATAACATATTGTATGGAATGTATTGTATGTATGAAATTATCGAAGAATGACAATTGCTTAAATAGAAATAAATATTTTTTTCTTGAATATAAATTAAATAATGATTATTATGGAAAGAAAAGTTATGTAAATAATATAAGAAAACATATTTCAAAAAAAGATAATGTTATTAATAATCACAAAAATTTTAAATTAAAAAGTTCAAAGGTTGATGAAATTATAGAAAGTTTA…	MKSVGSKVTKLIGKILCKNEKKNRRRKNNKTKDCSLFFIIKKQSCPLLYIILSILYITYCMECIVCMKLSKNDNCLNRNKYFFLEYKLNNDYYGKKSYVNNIRKHISKKDNVINNHKNFKLKSSKVDEIIESLKNLTLLEASELVKKIELTFSVDTKQNLNASNSSGQENKQNESDGKENEEDEENKVYDLILENIEPNKKIPIIKIVKEIKKDLNLKQAKDLVDNLPQTLFEKVNKETADKWKTKLTEAGGIVKLK	257	1	null	no	GO_0003735	GO_0003735	GO_0003735,GO_0003735	0	0	0	0	0	0	0	0	0	0	0	0	0	0	0	0	0	0	0	0	0	0	0	0	0	0	0	0	0	0	0	0	0	0	0	0	0
1138	PF3D7_0531200	ribosomal protein S16, mitochondrial, putative	null	ATGATAAGAAGATTATTCTTACCCTATTTTTCAAAGGATAAAGGGCCCCCAAGAATTCGATGTCAAGTTAATGGGGTAAAAAGAAAACGTTTTTTTAAAATAGTTGTAGCAAATCAAAAAGATAAAAAAAATGGAAAACACATAGAAGTGTTAGGTACATATGTAAATAAAAATAATATTAGAGAAAAGTTGAATAGATATAATATTACTAATCCAAGTAATGATTCTTATTATAATAATATAGAAAATATTAAAGAAATTCGATTACGATTTAATCGGGTCAAATTTTGGCTAGCTGCCAATTGTAACTTTAGTGATCATATGAAATATGTATTAAGTTTATGCAAAATTATACCTCAATATCCAATAAAATATAGTAGAAGATGTTCAGATAAATAT…	MIRRLFLPYFSKDKGPPRIRCQVNGVKRKRFFKIVVANQKDKKNGKHIEVLGTYVNKNNIREKLNRYNITNPSNDSYYNNIENIKEIRLRFNRVKFWLAANCNFSDHMKYVLSLCKIIPQYPIKYSRRCSDKYYHKYNEIINKHKLIQADKINNFLKTDLNIQYKNDFETSKNEPNNKDEYIYTPEELTYLKKLSKNRILEFEDKDKIRKIIR	213	0	null	no	GO_0003735	GO_0003735	GO_0003735,GO_0003735	0	0	0	0	0	0	0	0	0	0	0	0	0	0	0	0	0	0	0	0	0	0	0	0	0	0	0	0	0	0	0	0	0	0	0	0	0
1191	PF3D7_0605000	50S ribosomal protein L24, putative	null	ATGTTTTGGTCTTCATTTATAGGAAAAATTAATCAACTGCCAGTTTTGAGCCAGTTAAATAATTCTTTTTTGAAACATGTGAGCGTCAGAAATCATAAAATTATTAAACCAAGAAATATTATTAAGATGTGGAAAATAAGGAAAGGAGATGAAGTGAAAGTCATATCTGGAAAAGATAAAGGAAAAATAGGAGAAGTATTAAGTTGTGACAAATTTAGGAATATGGTAAAAGTCAAAGGATGTAATATGAGGAAACTTTTTGTTGATAATAAATTCGTTTATATTGAAAAAAAAATACATTATTCAAATGTTCAATTAATAGATAACTTTTTAAAAACAAATACAAAGGTAGCCTTAAGATATACAGATGATAATCAAGTTATTAGAATATCAAAAAAA…	MFWSSFIGKINQLPVLSQLNNSFLKHVSVRNHKIIKPRNIIKMWKIRKGDEVKVISGKDKGKIGEVLSCDKFRNMVKVKGCNMRKLFVDNKFVYIEKKIHYSNVQLIDNFLKTNTKVALRYTDDNQVIRISKKSGTVIPWPSEKTKEEDYDQIEENPLDTLPQEALKKTYDYKTDVKFMNILRQTVNKYNRELS	194	0	null	no	GO_0003735	GO_0003735	GO_0003735,GO_0003735	0	0	0	0	0	0	0	0	0	0	0	0	0	0	0	0	0	0	0	0	0	0	0	0	0	0	0	0	0	0	0	0	0	0	0	0	0
1277	PF3D7_0613400	50S ribosomal protein L18, apicoplast, putative	null	ATGTACATATCTTTCATATTATTTTCAATAATTTTTATTTTTCTTGGTGTAATAGAAAATTTCATAATTAACAAGAGGGTTTTGTATAAGCCGAATTTTTTATTATACTCTGAAAAAAAAAACAAAAAGAAAAGTACGCCTGAACAAGTAACAACTAGAGTTAATAAAGACCTTAAGGAGAAGAAAAGAAAAAGACCCAGAAGTAAAATTTTGGAATGTTTATTAAAAGAGAAAGTTGAAAAAGTTGAGAAGGTTGAAAAAAATTCAGATGAGAACCAATGTTCAAATGTCGATAAAGAAATAAGAGAAGGAAAAAGAGTTCCAAGACTTCGAGTGAGAAATACAAATAATCATATATATGCTTCAATAATTGATGATTATAAAAAATATGTATTATGT…	MYISFILFSIIFIFLGVIENFIINKRVLYKPNFLLYSEKKNKKKSTPEQVTTRVNKDLKEKKRKRPRSKILECLLKEKVEKVEKVEKNSDENQCSNVDKEIREGKRVPRLRVRNTNNHIYASIIDDYKKYVLCSTCSRDATLSKILGTYRRKATNRVINNGRTIKSAWEIGKIIGKKALSKGIFKVRFDRARHPYAGKVEALAEGARAVGLLL	213	1	HMM: MYISFILFSIIFIFLGV, NN: MYISFILFSIIFIFLGVIENF	yes	GO_0003735	GO_0003735	GO_0003735,GO_0003735	0	0	0	0	0	0	0	0	0	0	0	0	0	0	0	0	0	0	0	0	0	0	0	0	0	0	0	0	0	0	0	0	0	0	0	0	0
1288	PF3D7_0614500	60S ribosomal protein L19	RPL19	ATGTCACTCACATTACAAAAAAGATTAGCAGCTTCTGTTTTAAAATGTGGAAAGAATAAAATATGGATGGACCCAAATGAAATTAGCGAAATTTCATTAGCTAATTCAAGGTTTAGCATAAGAAAATTATATAAAGAAGGATTGATTTTAAAAAAGCCCCAAAAAGTTCATAGCAGAGCTAGGGTTAGATTATATAAGCTAGCCAAAAGAAAAGGTAGACATATGGGTATCGGTAAAAGAAAGGGTACCAAAAACGCAAGAACAAATCAAAAAACATTATGGATAAAGAGACAACGTGTTCTTAGAAGATTATTAAAAAGATTAAGAGACTCCAAAAAGGTAGATAGACATTTATATCACTCCTTTTATTTAAAATGTAAGGGAAACCAATTTAAAAAT…	MSLTLQKRLAASVLKCGKNKIWMDPNEISEISLANSRFSIRKLYKEGLILKKPQKVHSRARVRLYKLAKRKGRHMGIGKRKGTKNARTNQKTLWIKRQRVLRRLLKRLRDSKKVDRHLYHSFYLKCKGNQFKNKRTLIEAIQREKNETLKKKAIADQLEAKRLKAQVLRNKRKLKKDKEVVA	182	0	null	no	GO_0003735	GO_0003735	GO_0003735,GO_0003735	0	0	0	0	0	0	0	0	0	0	0	0	0	0	0	0	0	0	0	0	0	0	0	0	0	0	0	0	0	0	0	0	0	0	0	0	0
1626	PF3D7_0718400	mitochondrial ribosomal protein S8 precursor, putative	null	ATGCAGAGAGCATGTGAAATGGTTGTATCTTTATTACGAACAGATTCCATGACTCAAAAATGTCCATTCCATGTTTTGAATGTTCAAATTTTGGAATTATTACAAAAAGAAGGACTTATCAGAGGTTTCTCTATTAAAGGCACAAAAATAGATATACTACTAAAGCATTATAAAGGAGCACCAGTCATTAGAAATATCCGAGTTGTTTCAAAACCTAGTCGAGATATTTGGTTAACTCCTCATGAACTTAAATTTCGGACGAGATTTAACACGGGCCTTTGGGTTATGCAAACTAGCTGTGGTGTTATCAGTCATAGGGATTGTGTTCGCATGGGAATCGGAGGGAAAATGTTATTTGCTGTAAATAATGGATATCAACATTTTTGTTAA	MQRACEMVVSLLRTDSMTQKCPFHVLNVQILELLQKEGLIRGFSIKGTKIDILLKHYKGAPVIRNIRVVSKPSRDIWLTPHELKFRTRFNTGLWVMQTSCGVISHRDCVRMGIGGKMLFAVNNGYQHFC	129	0	null	no	GO_0003735	GO_0003735	GO_0003735,GO_0003735	0	0	0	0	0	0	0	0	0	0	0	0	0	0	0	0	0	0	0	0	0	0	0	0	0	0	0	0	0	0	0	0	0	0	0	0	0
1638	PF3D7_0719600	60S ribosomal protein L11a, putative	null	ATGGAAAACAAAGAACAAAATGTTATGAGAGAAATTAAAGTGAACAAATTGGTGCTCAATATCTGTGTTGGAGAATCGGGTGATAGGCTAACAAGAGCAGCAAGAGTGTTGGAACAACTAACTGAACAGAAGCCAATATTTGGAAAATGTCGATTTACCATAAGATCCTTTGGTGTTAGAAGAAATGAAAAGATATCATGTTTTGTAACAGTACGAGGAAAGAAAGCTTTAGAAATATTAGAGAAAGGGTTAAAAGTAAAAGAATATGAATTAAGAAGAAAGAATTTTTCGGATACAGGAAATTTCGGATTCGGTATTCAAGAACATATTGATTTAGGTATAAAATATGATCCTTCCACAGGTATATATGGTATGGATTTTTATGTTCATTTATCAAGG…	MENKEQNVMREIKVNKLVLNICVGESGDRLTRAARVLEQLTEQKPIFGKCRFTIRSFGVRRNEKISCFVTVRGKKALEILEKGLKVKEYELRRKNFSDTGNFGFGIQEHIDLGIKYDPSTGIYGMDFYVHLSRSGYRVTRRTRRRSKISKTHKVTKEDAMKWFQTKFDGILLK	173	0	null	no	GO_0003735	GO_0003735	GO_0003735,GO_0003735	0	0	0	0	0	0	0	0	0	0	0	0	0	0	0	0	0	0	0	0	0	0	0	0	0	0	0	0	0	0	0	0	0	0	0	0	0
1853	PF3D7_0810100	apicoplast ribosomal protein L33 precursor, putative	null	ATGAAACCATGTGATCTTTTCATTTACTTATTTTTGTATATTTTTATAATAATGAAATGTTATGATTTTTTCATAATTCCAAAGAATATGAAAATGGTTAAGAATCCTATTTATCAAAATAGATATACAGACAATAAAAGAAATGCACTTTTATATGCAAAAAAAAAAAGGAACAGAAAAGTAGTGATATTAGAATGTACTGAAGCAAGAAAATTGGGAAAGCAGCCATCAAGATATGTAACGGAAAAAAATAAAAATAATACTCCAAAAAAATTACAATTATATAAATACAATAAATATCTTAAAAGAAGAACATTACACGTTGAAATAAAATAG	MKPCDLFIYLFLYIFIIMKCYDFFIIPKNMKMVKNPIYQNRYTDNKRNALLYAKKKRNRKVVILECTEARKLGKQPSRYVTEKNKNNTPKKLQLYKYNKYLKRRTLHVEIK	111	1	HMM: MKPCDLFIYLFLYIFIIMKCY, NN: MKPCDLFIYLFLYIFIIMKCY	yes	GO_0003735	GO_0003735	GO_0003735,GO_0003735	0	0	0	0	0	0	0	0	0	0	0	0	0	0	0	0	0	0	0	0	0	0	0	0	0	0	0	0	0	0	0	0	0	0	0	0	0
1893	PF3D7_0813900	40S ribosomal protein S16, putative	RPS16	ATGACAACAAAAGTAAAAAGAGTTCAAACATTCGGCAAAAAGAAAACTGCCGTTGCTGTAGCAACAGTAACCAATGGTAAAGGGTTAATAAAATTAAACGGTAAGAATTTAGATTTAGTTGAACCCTATATTTTAAAAACTAAAGTATATGAACCCTTATGGTTAATTGGATCAGGCAAATTAAAAAATTTAGATATCCGTATAAGAGTTAAGGGTGGTGGTCAAACTTCTCAAATATATGCTATACGTCAAGCTATTGGTAAAGGAATAATTTCTTATTATCAAAAATATGTAGATGAATCAACTAAAAAAGAATTAAAAGATGTCTTGTTAAGATATGACAGATCATTGTTAGTAGGAGACACAAGAAGATGTGAACCCAAAAAATTTGGTGGAAAG…	MTTKVKRVQTFGKKKTAVAVATVTNGKGLIKLNGKNLDLVEPYILKTKVYEPLWLIGSGKLKNLDIRIRVKGGGQTSQIYAIRQAIGKGIISYYQKYVDESTKKELKDVLLRYDRSLLVGDTRRCEPKKFGGKGARARYQKSYR	144	0	null	no	GO_0003735	GO_0003735	GO_0003735,GO_0003735	0	0	0	0	0	0	0	0	0	0	0	0	0	0	0	0	0	0	0	0	0	0	0	0	0	0	0	0	0	0	0	0	0	0	0	0	0
1894	PF3D7_0814000	60S ribosomal protein L13-2, putative	null	ATGGTTGCCCATAATAACGTTTTACCAAATGTACATCTTCATAAATGGTGGCAAAGGCATGTAAGAGTTAACTTTAGTAAAAATATAAAAAAAAAAAAAAGAAGATTGTTGAGAGAAAAAAGAAGAAAAGCTAATGGAGGTACTCCTATTGAAAAATTACACCCAATTGTACACTGTCCAACTCAAAGATATAATTTTAGAACTAGGCTAGGAAAAGGATTTACCTTTGAAGAGTTAAAGGGAGCCGGATTAACTCCTAGAGCTGCACAAACTATAGGTATATGCTATGACAAAAGAAGAAAAAACAGATCTGAAGAATCCTTGACAAAAAATGTCGAAAGATTATTAAAGTATAAGAACAGTTTAGTTATGATCCCACTTAAGAAAAACAAAGCAAAG…	MVAHNNVLPNVHLHKWWQRHVRVNFSKNIKKKKRRLLREKRRKANGGTPIEKLHPIVHCPTQRYNFRTRLGKGFTFEELKGAGLTPRAAQTIGICYDKRRKNRSEESLTKNVERLLKYKNSLVMIPLKKNKAKKGIGGIPADADKNTIKEFRNKKPLLSIFKKEKNTKPFYETIEVSKIDKEFLAYKTLRRAKLAERRKNRRQQKKDIKFKSKDN	215	0	null	no	GO_0003735	GO_0003735	GO_0003735,GO_0003735	0	0	0	0	0	0	0	0	0	0	0	0	0	0	0	0	0	0	0	0	0	0	0	0	0	0	0	0	0	0	0	0	0	0	0	0	0
1970	PF3D7_0821700	60S ribosomal protein L22, putative	null	ATGGTGGCTAAAAAAGATAGTACAAAAGTTTCCAAGAAGCTCAAGAAAAAAGTTGTAAAGAAAACAAAAATTGTTAAGGGTTTGAAAAAACAAAAGATGAACAAGAGTACTAAGGGAATTAAATATGTTTTGGATTGTACCAAGCCTGTAAAGGATACAATTTTAGATATAAGCGGATTGGAACAATTTTTCAAGGATAAAATTAAAGTTGATAAGAAAACAAATAACTTGAAAAATAAAGTTGTAGTAACATCTGATGAATATAAAATTTATATCACCGTCCACATACCCTTTTCTAAAAGATACATAAAGTATTTGGCAAAGAAGTATATAAAGATGCACCAAATACGTGACTTCTTAAGAGTTATAGCTAAAGGAAAATTAGCCTACGAATTTAAA…	MVAKKDSTKVSKKLKKKVVKKTKIVKGLKKQKMNKSTKGIKYVLDCTKPVKDTILDISGLEQFFKDKIKVDKKTNNLKNKVVVTSDEYKIYITVHIPFSKRYIKYLAKKYIKMHQIRDFLRVIAKGKLAYEFKYFQLNN	139	0	null	no	GO_0003735	GO_0003735	GO_0003735,GO_0003735	0	0	0	0	0	0	0	0	0	0	0	0	0	0	0	0	0	0	0	0	0	0	0	0	0	0	0	0	0	0	0	0	0	0	0	0	0
2495	PF3D7_1003500	40S ribosomal protein S20e, putative	null	ATGAGTAAATTAATGAAAGGAGCTATTGATAACGAGAAGTATAGGCTTCGTCGTATTCGTATTGCTTTAACATCCAAAAACTTAAGAGCCATAGAAAAAGTATGCAGTGATATAATGAAAGGAGCTAAAGAAAAAAATTTGAATGTATCAGGACCTGTAAGATTACCAGTAAAAACCTTAAGAATAACTACCAGAAAATCACCATGCGGAGAAGGTACAAATACATGGGATAGATTTGAATTAAGAATATATAAAAGACTTATTGATTTATATTCACAATGTGAAGTTGTTACTCAAATGACATCCATCAATATCGATCCAGTTGTCGAAGTAGAAGTTATTATAACTGATTCTTAA	MSKLMKGAIDNEKYRLRRIRIALTSKNLRAIEKVCSDIMKGAKEKNLNVSGPVRLPVKTLRITTRKSPCGEGTNTWDRFELRIYKRLIDLYSQCEVVTQMTSINIDPVVEVEVIITDS	118	0	null	no	GO_0003735	GO_0003735	GO_0003735,GO_0003735	0	0	0	0	0	0	0	0	0	0	0	0	0	0	0	0	0	0	0	0	0	0	0	0	0	0	0	0	0	0	0	0	0	0	0	0	0
2500	PF3D7_1004000	60S ribosomal protein L13, putative	null	ATGTATAAGAAGGAATATGTTATCGATTGCAAAGGTCACCTATTAGGAAGGTTGGCATCTCTTATAGCAAAGGAATTATTAAATGGTCAAAGAATAGTAGCCGTAAGATGTGAAGATATAAACATCTCAGGAAGTTTATATAGGAATAAGCTTAAGTATCAAGAATTTTTAAGATTAAGAACTAACACTAATCCTAAAAAAGGACCTTTACATTTAAGAGAACCCTCAAAAATTTTGTGGAGATGTGTACGTGGTATGTTACCACATAAAACATATAAAGGACAACTTGCCTTAAAGAAATTGAAAGTATGTGTTGGTATGCCATATCCATATGATAAGAAAAAGAAATACGTTTTACCAAGTGCTCTTAGAGCTTTCCGTTTAAAAAAACACAGAAGA…	MYKKEYVIDCKGHLLGRLASLIAKELLNGQRIVAVRCEDINISGSLYRNKLKYQEFLRLRTNTNPKKGPLHLREPSKILWRCVRGMLPHKTYKGQLALKKLKVCVGMPYPYDKKKKYVLPSALRAFRLKKHRRYCRLGTLSSRVGWNYDTLVKKNEVLRKQVSKAYYKKKVNNLNEKKEIKTEALNLINPEQRQVLENFGYA	202	0	null	no	GO_0003735	GO_0003735	GO_0003735,GO_0003735	0	0	0	0	0	0	0	0	0	0	0	0	0	0	0	0	0	0	0	0	0	0	0	0	0	0	0	0	0	0	0	0	0	0	0	0	0
2732	PF3D7_1026800	40S ribosomal protein S2	RPS2	ATGAGTAACAAAAAAGGTCAATCCCCCAAAGAAGAGAGCATTGCTAAGATGCTTATATGTAAAGTGCATATAGGTACAAAAAATTTAGAGAACAAGATGAAAAGATACGTTTATACGAGAGCAAAGGATGGTGTACATATTATAAACTTAGCGAAGACATATGAGAAATTACAGCTTGCTGCACGAATTATCGTAGCTATAAGCAACCCAGCAGATGTAGTAGTTGTATCAGCAAGACCTTTTGGAAGTAGAGCTGTGTTAAAATTTGCTCAGTATACAGGAGCACAAGCCATAGCCGGTAGATGGACTCCTGGTATGTTAACAAATCAAATTATCCAAAAATTTACAGAACCAAGATTATTAATTGTAACGGATCCAAGAACAGATGCACAATCGGTT…	MSNKKGQSPKEESIAKMLICKVHIGTKNLENKMKRYVYTRAKDGVHIINLAKTYEKLQLAARIIVAISNPADVVVVSARPFGSRAVLKFAQYTGAQAIAGRWTPGMLTNQIIQKFTEPRLLIVTDPRTDAQSVKESAYANIPVIALCDSDSPLEHVDIAIPCNNKGKESIALMYWLLAQEVLYLKGVIPRSEPWNVMVDMFLWRDPEQFELKNLANEENTPTAPHLIENQYAAEAPYDEWTKKEEWNDNTNEDWKNPIAAEEW	263	0	null	no	GO_0003735	GO_0003735	GO_0003735,GO_0003735	0	0	0	0	0	0	0	0	0	0	0	0	0	0	0	0	0	0	0	0	0	0	0	0	0	0	0	0	0	0	0	0	0	0	0	0	0
2743	PF3D7_1027800	60S ribosomal protein L3	RPL3	ATGTCACATCGTAAATTTGAAAGGCCACGTCACGGTTCCTTAGGTTTCTTACCCAGGAAAAGATGCAAAAGATTAAGAGGAAAAATTCGATCCTTTCCAAAAGATGATAAAGAGAAGCCTCCACATTTTACAGCATTTATGGGATATAAAGCTGGTATGACACATATTGTTAGAGAAGTAGATAAACCCGGTTCAAAATTACATAAAAAAGAAATTGTAGAAGCATGTACTATTATTGAATGTGCTCCTATGGTAGTTGTTGGTATTGTAGGATATAGAGAAACCCCAAAGGGTTTACGTATCTTAAGTACTGTATGGGCTAATCATGTTTCTGATGAATTTAGAAGAAGATATTATAAGAACTGGTACAAATCCGAGAAAAAAGCTTTTACAAAATCA…	MSHRKFERPRHGSLGFLPRKRCKRLRGKIRSFPKDDKEKPPHFTAFMGYKAGMTHIVREVDKPGSKLHKKEIVEACTIIECAPMVVVGIVGYRETPKGLRILSTVWANHVSDEFRRRYYKNWYKSEKKAFTKSLNVPEATKNCLLKRIEKYCTVLRAICHTQPSKTPLRMKKAHIMEVQINGGSMKEKLEFVKEMLEKNLPVSTVFNPNEMIDVISVTKGHGTKGVVSRYGVKRLPRKTHRGLRKVACIGAWHPARVQFQIPRHGQKGYFHRTERNKKIYRIGLKTDKNSASTDADITEKKITPMGGFPHYGVVNEDFLLLKGCVAGTKKRPITLRKNIVPQVSRDALAQVSLKFIDTSSKIGHGRFQTSEEKVKYYGPLKKDLKA	386	0	null	no	GO_0003735	GO_0003735	GO_0003735,GO_0003735	0	0	0	0	0	0	0	0	0	0	0	0	0	0	0	0	0	0	0	0	0	0	0	0	0	0	0	0	0	0	0	0	0	0	0	0	0
2808	PF3D7_1034200	apicoplast ribosomal protein L27 precursor, putative	null	ATGAAAAATAAGGTTGTCATAATTTACTTTTTAGTATACATTACATATGTCATATTAGCTAAGTCAAAAAATGACCTTAAAGTTACGAAGGCATATTTAAGATATGGAAAGAATGATCAAAATATTCAAAATAGGAAACGAGAAAAAAGAACTCATATGTATTTGAATAACTCCAGTTTGTTGTCATCAAAGAATAATAATATGAATAAAACATTTTTCAAATATAATAAATTTATTGATCAAAATAATGACAAAGAATATTTTATGAAAACTTTTTTTAAAAATGGGAATATAATAAAATTTAGATATACTCATGAATTGTGGGCAAAAAAAAAAGGAGTAGGAAGTAGTCGAAATGGTAGAGATAGTAATCCAAAGAATTTGGGAGTGAAAGTATTA…	MKNKVVIIYFLVYITYVILAKSKNDLKVTKAYLRYGKNDQNIQNRKREKRTHMYLNNSSLLSSKNNNMNKTFFKYNKFIDQNNDKEYFMKTFFKNGNIIKFRYTHELWAKKKGVGSSRNGRDSNPKNLGVKVLGNNFAHAGNIIVRQRGRTFKPGNGVKQGRDFTLIAVKSGKVHFFNRVVSIIDVSEPKPLTFKDIYQENPTIIGLSKMWMSA	214	1	HMM: MKNKVVIIYFLVYITYVILAK, NN: MKNKVVIIYFLVYITYVILAKSK	yes	GO_0003735	GO_0003735	GO_0003735,GO_0003735	0	0	0	0	0	0	0	0	0	0	0	0	0	0	0	0	0	0	0	0	0	0	0	0	0	0	0	0	0	0	0	0	0	0	0	0	0
2896	PF3D7_1103100	60S acidic ribosomal protein P1, putative	RPP1	ATGGCATCAATTCCAGCATCAGAATTACCAGAATGTGAAAAGCAGGAACTTTTATGTACCTATGCTGCTTTAATATTACATGAAGAAAAAATGAGTATAACAAGTGACAATATTTTAAAGCTTATTAAAAATTCTAACAATACTGTTTTGCCATACTTACCAATGCTTTTCGAAAGGGCTTTAAAGGGAAAAGATATTCAGAGCTTATTAAGTAACTTAAGTGTAGGAAGTGCCCCTGCAGCTGCTGCCCAAGTTACAACTGAGAAACCAAGTGAAGACAAAAAGGAAGCCAAAAAAGAAGAGAAAGTAGAGGAAGAAGAAGAAGAAGATGATTTAGGTTTCTCCTTATTTGGTTAA	MASIPASELPECEKQELLCTYAALILHEEKMSITSDNILKLIKNSNNTVLPYLPMLFERALKGKDIQSLLSNLSVGSAPAAAAQVTTEKPSEDKKEAKKEEKVEEEEEEDDLGFSLFG	118	0	null	no	GO_0003735	GO_0003735	GO_0003735,GO_0003735	0	0	0	0	0	0	0	0	0	0	0	0	0	0	0	0	0	0	0	0	0	0	0	0	0	0	0	0	0	0	0	0	0	0	0	0	0
2957	PF3D7_1109900	60S ribosomal protein L36	RPL36	ATGGGAAGGAAATCAACCATTAAGCCAGCCACAGGAATAGCAGTTGGATTTAATAGTGGACATGTTGTAACAAAGAGAAATTTAAAATTACATAAGAAAAAGAAACCATTTTCTAAAAGAAAAGAATTGATAAAAGATGTCGTTAGAGAAATTACTGGATTTAGTCCATATGAAAAAAGAATAATTGAATTGATAAAAATAGGTACATCTGCTTCTACTAAAAGAAGTTTAAAATACGCTAAAAAAAAGTTAGGAACCCATAAAAGAGGAAAAGCTAAGAGAGAAGAAATTCAAAAAGTCGTTATTTTACAAAGAAGAAAAGCTGCTGAAAAACATTAA	MGRKSTIKPATGIAVGFNSGHVVTKRNLKLHKKKKPFSKRKELIKDVVREITGFSPYEKRIIELIKIGTSASTKRSLKYAKKKLGTHKRGKAKREEIQKVVILQRRKAAEKH	112	0	null	no	GO_0003735	GO_0003735	GO_0003735,GO_0003735	0	0	0	0	0	0	0	0	0	0	0	0	0	0	0	0	0	0	0	0	0	0	0	0	0	0	0	0	0	0	0	0	0	0	0	0	0
2964	PF3D7_1110600	mitochondrial ribosomal protein L11 precursor, putative	null	ATGTCCAGAATAGGAAGATTTAATTTAATCGTTTTGTCTGGTACGGCAAAACCAAGCGCAAGTATTGGACAAACCCTGGGACCACTAGGTATAAATATGATGACGTTTTTTAAAGAATTCAATGATAGAACGAAATGTATAGCCAAAAATGTACCAATACAAGTTACATTAGAACCTTTAAACGATAGAACGTATAGATTTTATTTAAGAACACCTACTGTTGTGTGGTTTATTAGAAGATGTGCAAGAGTTCCTATGTTTAGCTCTATGGCAAAACATAATACTGTTGGTTCCATAACCCTAGCTGAAGTTTTTCATATTGCCAAGTGTAAACGTATGGATCCACCTTTGATAAATTTATCCTTAAAGAGTATATGTAAATATATTATTGGAACATGC…	MSRIGRFNLIVLSGTAKPSASIGQTLGPLGINMMTFFKEFNDRTKCIAKNVPIQVTLEPLNDRTYRFYLRTPTVVWFIRRCARVPMFSSMAKHNTVGSITLAEVFHIAKCKRMDPPLINLSLKSICKYIIGTCNSMGIRVCKELNDEEKKKYFVDVNKLDNIKKDIRTRNKQQKRSKK	178	0	null	no	GO_0003735	GO_0003735	GO_0003735,GO_0003735	0	0	0	0	0	0	0	0	0	0	0	0	0	0	0	0	0	0	0	0	0	0	0	0	0	0	0	0	0	0	0	0	0	0	0	0	0
3109	PF3D7_1124900	60S ribosomal protein L35, putative	RPL35	ATGAGTAATGTTAAAGCTTATGAATTAAGGACCCTCAAGAAAAAAGAATTATTAGATAAATTAGATGAATTGAAAAAGGAGTTAAGTGGCTTAAGAATAAGCAAAGCCTTAGGGAACTCTGCTAAGAATTCCAAAATCCACGGCGTCAGGAAAAATGTGGCAAGAGTTTTGACAGTTTATAATCAAAAAAGAAAAATGGAATTGAGACAATTATACAAAAATAAAAAATTCAAACCATATAATTTAAGAAAAAAGTTGACAAAAAATAAAAGACTTCAATTATCTCCCAAACAAAAAGCAGCCATGACCTTAAGACAAAAAAAAAAAGTACAAAATTTCCCACAAAGAAAATACCTCGTTGTACACAAGGAATAA	MSNVKAYELRTLKKKELLDKLDELKKELSGLRISKALGNSAKNSKIHGVRKNVARVLTVYNQKRKMELRQLYKNKKFKPYNLRKKLTKNKRLQLSPKQKAAMTLRQKKKVQNFPQRKYLVVHKE	124	0	null	no	GO_0003735	GO_0003735	GO_0003735,GO_0003735	0	0	0	0	0	0	0	0	0	0	0	0	0	0	0	0	0	0	0	0	0	0	0	0	0	0	0	0	0	0	0	0	0	0	0	0	0
3161	PF3D7_1130100	60S ribosomal protein L38	RPL38	ATGCCAAAACAAATTACTGATATTCGTAAATTTTTAAAAATTAGTAGGAAGCCTGATACCACTGCTGTAATTATAATGAAGAAGAAAAGTAAAACAAAGAAAAATACTGTGATAACAAAATTAAAGTTAAGAACAAAAAAATATTTATACACTATGGTTTTTGCTGATCGTAAAAAAGCTGAAAGAATTGAAAACTCCTTATTACCAAGTTTGAAGAGAATTTATTATCCACAAAAAAAAGTAGGAAAAACTGTTAAGAAATGA	MPKQITDIRKFLKISRKPDTTAVIIMKKKSKTKKNTVITKLKLRTKKYLYTMVFADRKKAERIENSLLPSLKRIYYPQKKVGKTVKK	87	0	null	no	GO_0003735	GO_0003735	GO_0003735,GO_0003735	0	0	0	0	0	0	0	0	0	0	0	0	0	0	0	0	0	0	0	0	0	0	0	0	0	0	0	0	0	0	0	0	0	0	0	0	0
3162	PF3D7_1130200	60S ribosomal protein P0	PfP0	ATGGCGAAATTATCCAAGCAACAAAAAAAGCAAATGTACATTGAGAAGCTTAGCTCTCTCATTCAACAATATTCCAAAATATTAATTGTGCATGTAGACAATGTGGGATCTAATCAAATGGCTAGTGTTCGTAAAAGTTTAAGAGGAAAGGCTACAATATTGATGGGAAAAAATACAAGAATTCGAACGGCTCTTAAAAAGAATTTACAAGCTGTACCTCAAATAGAAAAATTGTTACCTTTAGTAAAATTAAATATGGGTTTTGTATTTTGTAAAGATGATTTATCTGAAATAAGAAACATCATTTTAGATAATAAATCTCCAGCACCAGCAAGATTAGGTGTTATAGCACCAATAGACGTTTTTATTCCACCAGGACCAACAGGTATGGATCCATCT…	MAKLSKQQKKQMYIEKLSSLIQQYSKILIVHVDNVGSNQMASVRKSLRGKATILMGKNTRIRTALKKNLQAVPQIEKLLPLVKLNMGFVFCKDDLSEIRNIILDNKSPAPARLGVIAPIDVFIPPGPTGMDPSHTSFFQSLGISTKIVKGQIEIQEHVHLIKQGEKVTASSATLLQKFNMKPFSYGVDVRTVYDDGVIYDAKVLDITDEDILEKFSKGVSNVAALSRATGVITEASYPHVFVEAFKNIVALIIDSDYTFPLMENIKKMVENPEAFAAVAAPASAAKADEPKKEEAKKVEEEEEEEEDGFMGFGMFD	316	0	null	no	GO_0003735	GO_0003735	GO_0003735,GO_0003735	0	0	0	0	0	0	0	0	0	0	0	0	0	0	0	0	0	0	0	0	0	0	0	0	0	0	0	0	0	0	0	0	0	0	0	0	0
3232	PF3D7_1137100	mitochondrial ribosomal protein S9 precursor, putative	null	ATGATAGGTATAAAATCTTTAAGAAATTTCATTTTAAAAAATATCAAGGAAAATATTAATAAAGGATTTTTTATTCAATACATACATAATTATTCTACACAAAATGAAATAAGTAAAAAATATAAAAATGATTATATTTTATCCTTAGATGAAGCATTATATTTATCTAAAGAGTTGGGAATTAAGACAACTACAGAGATCCAAAGAATTATTATGAGGTCCCCACCATTTTCTCCAGATACAAGTCCGTTCGTTATTGAAAATTTTTTTTCTAGTGAACGACAAGAAAATGATTTAGAAGAATTTTCAGAAATTGATAAAAAAATTATGGAATTAGAAACGACAAAAAAAGAAAAAGAGGAAGATAAAAAAAACCAAGGTGATTTTTGTTCTAATAAT…	MIGIKSLRNFILKNIKENINKGFFIQYIHNYSTQNEISKKYKNDYILSLDEALYLSKELGIKTTTEIQRIIMRSPPFSPDTSPFVIENFFSSERQENDLEEFSEIDKKIMELETTKKEKEEDKKNQGDFCSNNIKISECENNYNDSIINKILIDNFNKKRVKTFWHDNNEWLEESEGIGTNKRSCAYVYIKRGSGIIKINDKEDLYIRWPYFYNRMDVLEPFYITNTACVFDVFIKLKGGGISGQSKAARLAVGRALLNACPHIYNELKQHDILYEDMRQKFPKMPGRKKSRAMKQWSKR	300	0	null	no	GO_0003735	GO_0003735	GO_0003735,GO_0003735	0	0	0	0	0	0	0	0	0	0	0	0	0	0	0	0	0	0	0	0	0	0	0	0	0	0	0	0	0	0	0	0	0	0	0	0	0
3236	PF3D7_1137500	apicoplast ribosomal protein S14p/S29e precursor, putative	null	ATGTTGAGTTTTATAAAATTATTATTATTTTTTTTTAATTTTATGATCTTTCAAGGAAAGGTTATATTATGTGTAAATCATAAAAGTTCAGATTTATCCTTATTTTTATATTCCCATAGAATTTATGAAAACAAAAAGAAAAATCATGTGAGGAAAAAATTGAGTATATTAAATTTAAAGAAGAGATTAGACCCGAATGATAAATACACTGTGATAAAAAGGCATGAATCCAAAATACAAAGAAATTTAAAAAGAAAATATATGATCGAAAGATATAAAGAAAAGAGGCAACAATTAAAAAAATATATATCTGAAGCTTCATCACCTATTGAATATGTTTATTGGAAATATAAACTTTCAACATTACCTAGAGATTCATGTCCAGTACGATATAGAAAT…	MLSFIKLLLFFFNFMIFQGKVILCVNHKSSDLSLFLYSHRIYENKKKNHVRKKLSILNLKKRLDPNDKYTVIKRHESKIQRNLKRKYMIERYKEKRQQLKKYISEASSPIEYVYWKYKLSTLPRDSCPVRYRNRCAITGRARGYYSFFGLCRHQARSLIQKMFFPGFVKASW	172	0	HMM: MLSFIKLLLFFFNFMIFQGKVILCV, NN: MLSFIKLLLFFFNFMIFQGK	yes	GO_0003735	GO_0003735	GO_0003735,GO_0003735	0	0	0	0	0	0	0	0	0	0	0	0	0	0	0	0	0	0	0	0	0	0	0	0	0	0	0	0	0	0	0	0	0	0	0	0	0
3285	PF3D7_1142600	60S ribosomal protein L35ae, putative	null	ATGGAAAATGTAAAAGTAAAAAAAGAACAAACGGAAGTATCTCAGAAAAAAAAAGTTGTCAAGAAGGTTTTAAAGAAAAATAAAAAAACATCTAACAAAAAACTCCAAGCTGTTCGATTATATGAAAAGGGAGTTATATTAGGATACAAAAGATCTCAAAGAAATCAAGATCCCAACTTTACATTAATATCCATTAAAAATGTGAACACGAAAAAGCACGCACAATTCTATGTAGGAAAAAGAGTTGCTTATGTTTATAGAACAACTAAACATCATGATGGAGTTAAAATAAAATGTATATGGGGAAAAGTATGTAGGACTCATGGTAATAGTGGTGTTATAAGAGCAAAATTTAAAACTCATATCCCACCTAAAGCTTTCGGTGATAGAGTTAGAATA…	MENVKVKKEQTEVSQKKKVVKKVLKKNKKTSNKKLQAVRLYEKGVILGYKRSQRNQDPNFTLISIKNVNTKKHAQFYVGKRVAYVYRTTKHHDGVKIKCIWGKVCRTHGNSGVIRAKFKTHIPPKAFGDRVRILMYPSNI	140	0	null	no	GO_0003735	GO_0003735	GO_0003735,GO_0003735	0	0	0	0	0	0	0	0	0	0	0	0	0	0	0	0	0	0	0	0	0	0	0	0	0	0	0	0	0	0	0	0	0	0	0	0	0
3299	PF3D7_1144000	40S ribosomal protein S21	RPS21	ATGTTTAACGATCAAAAAGTTTTAGTCGATATTTATATACCCAGGAAGTGCTCAGCTACATCACGACTTATTCCGGCCAAGGAACATGGAGCTGTACAAATAAATGTTGGAATGGTTGATGCTAATGGAGTTTACAACGGTAAAACCGAAACCTTCGCTATCTCTGGTCATGTCAGACAAAATGGAGAATCAGATGCTTGCTTAAATAGACTTATGTATGAAAAGAAATTATTATCCTTTCAAAACTAA	MFNDQKVLVDIYIPRKCSATSRLIPAKEHGAVQINVGMVDANGVYNGKTETFAISGHVRQNGESDACLNRLMYEKKLLSFQN	82	0	null	no	GO_0003735	GO_0003735	GO_0003735,GO_0003735	0	0	0	0	0	0	0	0	0	0	0	0	0	0	0	0	0	0	0	0	0	0	0	0	0	0	0	0	0	0	0	0	0	0	0	0	0
3587	PF3D7_1223900	50S ribosomal protein L24, putative	null	ATGTCGAGATATGTAAAATATTTCGTTCAAGCGAAAAGACTAGATAAAAGGAAAAGGAAATATTATAAACTAGATTTCCTAGAATTAAACAAAGAATTAAGTATCCCACATCCTTTAAGAGAACAAAATCAACCGAAACGATTGGACTTGTCGAAATATTTAAATATAGAAGTAGGTGATTTAGTTAAAGTGTTGTATGGACCGGATAAAGACAAAGAAGGGTTAGTATTAAGTATTAACCCTAAAAGAAATACAGTAACTGTTGATGGATGTAATATGAAGAAATCTGCTTGGAATGTAACAGATAATAAGAAAGGTTCAATAATTACGCAAGAAATGCCTATTCATATAACGAATGTTTCTTTATTAGATCCAATAAGTAAAAAACCAACAGTTGTC…	MSRYVKYFVQAKRLDKRKRKYYKLDFLELNKELSIPHPLREQNQPKRLDLSKYLNIEVGDLVKVLYGPDKDKEGLVLSINPKRNTVTVDGCNMKKSAWNVTDNKKGSIITQEMPIHITNVSLLDPISKKPTVVKRRYMMNGECVRISKISGCAMPEPVHKNILKEQNNYERFMHKKKIGPPIKDIYAEKDYKNFNLLKKIAYEIKKKRFYDMKNFFKKDDKVENATD	227	0	null	no	GO_0003735	GO_0003735	GO_0003735,GO_0003735	0	0	0	0	0	0	0	0	0	0	0	0	0	0	0	0	0	0	0	0	0	0	0	0	0	0	0	0	0	0	0	0	0	0	0	0	0
3737	PF3D7_1239100	mitochondrial ribosomal protein L23 precursor, putative	null	ATGTTTTTGAGCTTTGTTCGATATACTCCTCCTAAAACGCCAAGAAATGTATTTTTTCCATGGCATACATTTTGTATACATAAGTCAGGTAGTTTCTTAGAAAAGAACCGATTGGCTTTAAGAGTTCCTATAAATTTGACAAAATTTGAAATACGAGAATATTTAAGAAAAATATATAATGCAAAAGTAATTAAGGTGAATACATTAATTAAGATACCTGAACGACGACGTAATTTAACAGATCATAGATTTAATTATTATAGGAATGGACCAAGATATAAAAAAGCTATTATTACATTAGAACATGAAGTACCGGATAGTGTTAAAATGATACAGTCATGTAAAAATATAGGTAGAAATCCATATATAACAAAAAAAAATATTACATATGGGGTTAGA…	MFLSFVRYTPPKTPRNVFFPWHTFCIHKSGSFLEKNRLALRVPINLTKFEIREYLRKIYNAKVIKVNTLIKIPERRRNLTDHRFNYYRNGPRYKKAIITLEHEVPDSVKMIQSCKNIGRNPYITKKNITYGVRSDVKIRPTRSQLWHMGECRYSWRLPLTNLLSDYNMNLNPDLRIDDEFVQLTPDPTKPFMHSGISSETIKPNNVPKQTFPHIDLTPWRRQVKKIYDSGTLAPPESFPVTYNGKETIEYSSENKNIKKSSSSKWKPPS	269	0	null	no	GO_0003735	GO_0003735	GO_0003735,GO_0003735	0	0	0	0	0	0	0	0	0	0	0	0	0	0	0	0	0	0	0	0	0	0	0	0	0	0	0	0	0	0	0	0	0	0	0	0	0
3768	PF3D7_1242700	40S ribosomal protein S17, putative	null	ATGGGAAGAGTCAGGACTAAAACTATTAAAAGAGCCGCAAGGCAAATTGTAGAAAAGTACTATGCCAAATTAACTCTAGATTTTCAAATTAACAAAAAGATAACAGAGGAAGTAGCCATAATTCCCTCAAAGAGAATGAAAAATAAAGTTGCTGGTTTTGTTACTCACTTAATGAAAAGAATACAAAAGGGACCTGTACGTGGTATTAGTTTGAAATTACAAGAAGAAGAAAGAGAAAGACGTTTAGATTTTGTCCCAGAAAAATCACAAATTGATGTTAGCGTAATTTATGTAGAACCTGATACATTACGTATGATCAAATCCTTGGGTATAAATATTAGCAACATGAAAGTACATAATCCCATGATTAACACTAACCAACAAAAACAAAACAGAATG…	MGRVRTKTIKRAARQIVEKYYAKLTLDFQINKKITEEVAIIPSKRMKNKVAGFVTHLMKRIQKGPVRGISLKLQEEERERRLDFVPEKSQIDVSVIYVEPDTLRMIKSLGINISNMKVHNPMINTNQQKQNRMNNQF	137	0	null	no	GO_0003735	GO_0003735	GO_0003735,GO_0003735	0	0	0	0	0	0	0	0	0	0	0	0	0	0	0	0	0	0	0	0	0	0	0	0	0	0	0	0	0	0	0	0	0	0	0	0	0
3794	PF3D7_1245400	50S ribosomal protein L3, mitochondrial, putative	null	ATGATTTTTTCGAGGTATCCCCTTATTTGTGGTAATAAAAAAAAAATAGAGGATGGATTTTTTTATTTTATAAAGAATGAGAAAAAGGGTTTTTATGCCTCAAAATGGATACGTAGATTACAATTATTAAATGAAAAATATAATTATAAGATAGATAAAGAAGAAGAAGAAATAGAATATGAAGAGAAGAAAGAGGATGATAATATAAAAAAAGTATATCCTTTATGGAATAGTAGAAGATCAGGATTATTAGGTTATAAAGTTGGATGTATGAGTATATGGGATGTATGGGGTGTTAAGCATGCTGTTACGGTTGTTAAGATAGATAATTGTTATGTAATTAATCAAAAAACTATAAGTAAAAATGGATATGAAGCTTTAGAGCTTGGAGTTGGTAAT…	MIFSRYPLICGNKKKIEDGFFYFIKNEKKGFYASKWIRRLQLLNEKYNYKIDKEEEEIEYEEKKEDDNIKKVYPLWNSRRSGLLGYKVGCMSIWDVWGVKHAVTVVKIDNCYVINQKTISKNGYEALELGVGNMNVIKQSKNNIGNFIKRKLGFIHKIKEFKCTSDCFLPIHHKFSCRHFSPGQNLFISSGIKNKGFCGAMKKWNFSGKNKSHGTESKAHRSLGSVSMGKTINIVFRNKKMNTHIGEKSLVKCSNNKLFRINSLKNLLFIKGTIGGYKNKVIKISDAKGRSFNKFKNKIFLYYPTFIYKKNKKYKNVIDMPHSVEDPFLYNEIPLYDPPNK	341	0	null	no	GO_0003735	GO_0003735	GO_0003735,GO_0003735	0	0	0	0	0	0	0	0	0	0	0	0	0	0	0	0	0	0	0	0	0	0	0	0	0	0	0	0	0	0	0	0	0	0	0	0	0
3910	PF3D7_1302800	40S ribosomal protein S7, putative	null	ATGGATGCTGTTCAAAAGAGAGTATTGAAAAGTAACCCAAGCGATTTAGAAAAAGAAATAGCACAATGTTTGTTAGACATTGAATTATCTAGTTCTTCGGATATAAAAACAGATGCTAAAGAAATAAAATTATTATCATGTGATTTAATAGAAGTAGAAAAATTAAAAAAGAAAACCATTTTAATTTATATTCCTTACAAAATTTATACAACCTATGTAAGAAAAATCCAAAGAAAATTAATTAATGAATTAGAAAAAAAAACGAAAAAATATGTTGTGTTAGTTGCAAAAAGAACAATATTAAAAGGAAAACAAAAAAATAAATCTTTCAAAATTATCCCAAGATCAAGAACTTTAACCAGTGTATATGATTCAATCCTTGAAGATATTGTATCACCA…	MDAVQKRVLKSNPSDLEKEIAQCLLDIELSSSSDIKTDAKEIKLLSCDLIEVEKLKKKTILIYIPYKIYTTYVRKIQRKLINELEKKTKKYVVLVAKRTILKGKQKNKSFKIIPRSRTLTSVYDSILEDIVSPSEIIGKRISMKADGKRVFKIMLDSKERQRDNIEEKLISFAAVYKKITRRDAVFSLPPTNEK	194	0	null	no	GO_0003735	GO_0003735	GO_0003735,GO_0003735	0	0	0	0	0	0	0	0	0	0	0	0	0	0	0	0	0	0	0	0	0	0	0	0	0	0	0	0	0	0	0	0	0	0	0	0	0
3966	PF3D7_1308300	40S ribosomal protein S27	RPS27	ATGAATGTCGATTTATTAAATCCAGATCCAGTTGAAGAATCAAAGAAACATAAATTAAAGAGATTAATTCCAACTCCTAATTCTTATTTTATGGATGTTAAATGCCCAGGATGTCTCCAAATTACAACTTTATTTAGTCACGCACAAAATGTTGTTTTGTGTGGAAGCTGTAACATTATGTTGTGCCAACCAACCGGTGGAAAATGTAAATTGACTGAAGGTTGCTCCTTTAGGAAAAAAATTGAATAA	MNVDLLNPDPVEESKKHKLKRLIPTPNSYFMDVKCPGCLQITTLFSHAQNVVLCGSCNIMLCQPTGGKCKLTEGCSFRKKIE	82	0	null	no	GO_0003735	GO_0003735	GO_0003735,GO_0003735	0	0	0	0	0	0	0	0	0	0	0	0	0	0	0	0	0	0	0	0	0	0	0	0	0	0	0	0	0	0	0	0	0	0	0	0	0
4262	PF3D7_1338200	60S ribosomal protein L6-2, putative	null	ATGACAAACACAAGCAACGAATTAAAGCACTATAATGTGAAAGGAAAGAAAAAAGTTTTAGTACCGGTAAATGCAAAAAAAACCATTAACAAGAAATACTTCGGAAGGAAAGTTGCTTCCAAAAAGAAATATGTTGTACAAAGAAAATTAAGGAAATCTATAGAAGTAGGAAAGGTAGCCATCATATTAACAGGAAAACATATGGGTAAGAGATGTATAATAACCAAAATTTTAAATTCAGGATTATTAGCTGTAGTAGGTCCATATGAAATTAATGGGGTTCCTTTAAAAAGAGTTGATTCAAGATATTTAGTTGTTACATCTACTAATATTTTTAACTTTGAAAATATAGCCAAGTTAAAAGATGACTTCCTTAACTATGCTCAAGATATTGATGAT…	MTNTSNELKHYNVKGKKKVLVPVNAKKTINKKYFGRKVASKKKYVVQRKLRKSIEVGKVAIILTGKHMGKRCIITKILNSGLLAVVGPYEINGVPLKRVDSRYLVVTSTNIFNFENIAKLKDDFLNYAQDIDDDSFIKTLEIKKKQKKLLKNKNEALFMNNVIDKIKEIRKEDPKVQKLEGIQKDIGSLLKPEILKNKVFAHYLKSKFTLRNDMVLHKMKF	221	0	null	no	GO_0003735	GO_0003735	GO_0003735,GO_0003735	0	0	0	0	0	0	0	0	0	0	0	0	0	0	0	0	0	0	0	0	0	0	0	0	0	0	0	0	0	0	0	0	0	0	0	0	0
4288	PF3D7_1341200	60S ribosomal protein L18, putative	null	ATGGTTAAAAAAATAGATAACTCTTTAAATACAAATATACACCAATATCATATTGTTGGAAGAGCTATTCCTACAGCTAAGGATAAGAACCCAAATGTTTATCGCATGTGTATATTTGCTAAGAATGACACTAATGCAAAATCTCGCTTTTGGTACTTTATGAAAAAGATTAATAAACTTAAAAAATCTAATGGAGAATTATTAGCATGTGAACAAATTAAAGAAAGATTTCCCTTACGTGTAAAGAACTATGGTGTTTTATTAAGATATGATAGTAGAACAGGTACTCATAATATGTATAAAGAATTTAGAGATACAACCAAAGAAGGAGCCATAGCTCAATTATATTCTGAAATGGCTGGTAGGCACAGAGCAAGAGCCTCATCTATTAATATTATA…	MVKKIDNSLNTNIHQYHIVGRAIPTAKDKNPNVYRMCIFAKNDTNAKSRFWYFMKKINKLKKSNGELLACEQIKERFPLRVKNYGVLLRYDSRTGTHNMYKEFRDTTKEGAIAQLYSEMAGRHRARASSINIIRISEISSSLVRRPHIKQLLKRRLRFPALHLPTLQKEYRKKFASKRPSTYRM	184	0	null	no	GO_0003735	GO_0003735	GO_0003735,GO_0003735	0	0	0	0	0	0	0	0	0	0	0	0	0	0	0	0	0	0	0	0	0	0	0	0	0	0	0	0	0	0	0	0	0	0	0	0	0
4295	PF3D7_1342000	40S ribosomal protein S6	null	ATGAAGCTGAACATTTCTAACCCCCTTAACAATGTACAAAAAAGCATAGAGATCGACGATGAAAAGAAGTTATTACCTTTTATGGAAAAGAGGATAGGAAATGCTGTACCTGGAGATTCAATAGGCGAAGAATTTACGGGTTATGTATTTAGAATCACTGGAGGTAATGATAAACAAGGTTTTCCTATGATTCAGGGTGTGTTAACTAATAATCGTGTTCGTTTATTATTTAAGAAAGGTATGAAATGTTATAGACCCAGGAAAAAGGGTGAAAGGAAAAGAAAGTCCGTGAGAGGTTGTATTGTTGGTCAAGATTTATCAGCATTAAATTTAACATTAGTTAAAAAAGGTGTAAATGAAATACCAGGTTTAACGGATAAAGCCGTAGGTAAAAAACTA…	MKLNISNPLNNVQKSIEIDDEKKLLPFMEKRIGNAVPGDSIGEEFTGYVFRITGGNDKQGFPMIQGVLTNNRVRLLFKKGMKCYRPRKKGERKRKSVRGCIVGQDLSALNLTLVKKGVNEIPGLTDKAVGKKLGPKRASKIRKLFNLDKSDDVRKYVIGRAITKNGKTKFIKPKIQRLVTEKRLLRKRNLLQAKEKRRLEKKQQLKEYKQLLNKYRSELNQQHDVETTKKKKVKKSLSKTNKTASKSKLNTKQEQKDKTEKKQNKTNNIKNDKSEKKEQAKKKTKTNENTQQTKQNKPDKKNKAKK	306	0	null	no	GO_0003735	GO_0003735	GO_0003735,GO_0003735	0	0	0	0	0	0	0	0	0	0	0	0	0	0	0	0	0	0	0	0	0	0	0	0	0	0	0	0	0	0	0	0	0	0	0	0	0
4389	PF3D7_1351400	60S ribosomal protein L17, putative	null	ATGGTTAAATATGCTAAAAAAATAAGAAACCTTGGGAAATGTGCCAAGGGAGCAGGTGTTGATTTAAGGGTACATTTTAAAAATACGTATGAAGCTGCAAGGGCTATAAGGAGAATGAAATTATTAGAAGCCAAGAAATACTTGAATGATGTTATTGAAAAGAAAAGATGTGTACCTTTCCGTAAATATAATGGTGGTGTAGGAAGAACAAACCAAGCTAAAGAATTTAATCATACACAAGGAAGATGGCCAGCTAAATCTTGTAAATTCTTATTGAATATTCTTGATAATGTACAAGCCAACGCAGAGTCAAGAAATTTGGATGTTAGTAAACTAAGATTAATTCATGTTATGGTAAACAAAGCTCGACCAGGTAGAAGAAGAACATACAAGGCACAT…	MVKYAKKIRNLGKCAKGAGVDLRVHFKNTYEAARAIRRMKLLEAKKYLNDVIEKKRCVPFRKYNGGVGRTNQAKEFNHTQGRWPAKSCKFLLNILDNVQANAESRNLDVSKLRLIHVMVNKARPGRRRTYKAHGRINPFMSSPCHIQIIAREINKPAKKSLLSNAEKQKKLPFKVTLKKLIKLNISNQNRLKNKSVKKQQTVQ	203	0	null	no	GO_0003735	GO_0003735	GO_0003735,GO_0003735	0	0	0	0	0	0	0	0	0	0	0	0	0	0	0	0	0	0	0	0	0	0	0	0	0	0	0	0	0	0	0	0	0	0	0	0	0
4460	PF3D7_1358800	40S ribosomal protein S15	RPS15	ATGGGACGTATGTACGGTAAAGGTAAAGGTATATCTAGTTCTACACTTCCATATAAAAGGAAACAACCAAGTTGGTTAAAACAAAAACCATCAGAAATTGAGGATGCTATAATTAAGTTAGCTAAAAAAGGACAAACCCCATCACAAATAGGTGCCACCTTAAGAGATAATTATGGTATTCCACAGGTAAAATCTGTTACCGGAAATAAAATTTTAAGAATCTTAAGAGCTCAAGGTATTGCTACAACTATTCCTGAAGATTTATATTTTTTAATTAAAAAAGCTGTTTCTATGAGAAAACATCTTGAAAAGAACAAGAAAGATAAAGATTGTAAGTTCAGACTTATTTTAACCGAATCCAAAATTCATAGAATATCACGATATTATAAAAGAAAAAAA…	MGRMYGKGKGISSSTLPYKRKQPSWLKQKPSEIEDAIIKLAKKGQTPSQIGATLRDNYGIPQVKSVTGNKILRILRAQGIATTIPEDLYFLIKKAVSMRKHLEKNKKDKDCKFRLILTESKIHRISRYYKRKKLLPSNWKYQSSTASALIA	151	0	null	no	GO_0003735	GO_0003735	GO_0003735,GO_0003735	0	0	0	0	0	0	0	0	0	0	0	0	0	0	0	0	0	0	0	0	0	0	0	0	0	0	0	0	0	0	0	0	0	0	0	0	0
4627	PF3D7_1404400	mitochondrial ribosomal protein L16 precursor, putative	null	ATGCCCCCAATAATTTATAAAAGTCCTCTACCTGTTCGATTAAAAGCCCCGAAGGGTAGAATAACACCTTTGAATGGACCCGATATAAAAATTGGGAAATCATTAATAGCTGCCTGTCCAAAAAGAATAAGAGGAGAAAAATTAGCTGAAATGAAACAAACAATACGTAAGTATTTAGGAAAGAAAAAAGAATATTTGATTGATGTTCATGCAACTTATAGTGTAACAAAAAAACCTGATGGAACAAAAATGGGACAAGGTAAAGGAATCATTGATCATTTTGTAGCTAGAGTACCTTCAGGAAAAACTATTTTTTCTATACCTACCATAAGCCCATTCAATACATTAGGGTTTGATGACCCTGTATATAGAGTATTAAAAAAAGCAGCAGCAAAAGTA…	MPPIIYKSPLPVRLKAPKGRITPLNGPDIKIGKSLIAACPKRIRGEKLAEMKQTIRKYLGKKKEYLIDVHATYSVTKKPDGTKMGQGKGIIDHFVARVPSGKTIFSIPTISPFNTLGFDDPVYRVLKKAAAKVAIPCVFRTQNNLFRVHNIKYISQQKVKNDQLKHFNQFKSKLFQKKDEV	181	0	null	no	GO_0003735	GO_0003735	GO_0003735,GO_0003735	0	0	0	0	0	0	0	0	0	0	0	0	0	0	0	0	0	0	0	0	0	0	0	0	0	0	0	0	0	0	0	0	0	0	0	0	0
4671	PF3D7_1408600	40S ribosomal protein S8e, putative	null	ATGGGTATTAGCCGTGACGGAAGACACAAGCTTCGCTTGACAGGTGGAAAAAAAAAGATCCACAAGAAAAAAAGAAAATATGAATTAGGTAGGCCTCCTTCAAATACCAAATTAGGTAGCAGACAAGTACACGTAGTTAGAGGAAGAGGAAGAAATTACAAATATCGTGCCATTAAATTAGATTCAGGTAGTTTTTCATGGCCTACCTTTGGTATTTCAAAGAATACAAGAATTATTGATGTTGTTTATAATGCATCAAACAACGAACTTGTAAGAACAAAAACACTCGTCAAAAATTGTATAGTCGTAATAGATTCCCACCCATTCACCACATGGTATGAAAACACATTCGGAACAACCCTTGGAAAAAAGAAGAAAGAAAAGAAGGAAGAAGATAAT…	MGISRDGRHKLRLTGGKKKIHKKKRKYELGRPPSNTKLGSRQVHVVRGRGRNYKYRAIKLDSGSFSWPTFGISKNTRIIDVVYNASNNELVRTKTLVKNCIVVIDSHPFTTWYENTFGTTLGKKKKEKKEEDNKEENKQEVENNEEAAKDETTKTYGVIKKIGKSKNIDPLLLEQFKQGRVLACISSRPGQCGKADGYIIEGDELLFYKRKMDKKKRN	218	0	null	no	GO_0003735	GO_0003735	GO_0003735,GO_0003735	0	0	0	0	0	0	0	0	0	0	0	0	0	0	0	0	0	0	0	0	0	0	0	0	0	0	0	0	0	0	0	0	0	0	0	0	0
4723	PF3D7_1413400	30S ribosomal protein S9, putative	null	ATGTTTTTTAATCATGTAAAGAGTTATATAATTTTGTTCATTTTATTTTGTTCATATTACATAAATGGGAGGGGTGTTAATAGGATTTATAAAAATTGTGGAAGAAAAAAATTGGGAAATATTTTTTGTTGTGCAAATATTATATGTGTTAAGGAAAGAGTAAAAAAGATAAAGCATATTGATAGGTGGGAATATAAAAGAAAGAAAAGAAAAAATATAAATATTTTTTTATATATACCAATAAAGAAAGATATAAATAAGATGAAATATTATAATTTTCGAAATATTGTTATAAATGATTTTTTTTTTTTTATAAATAAATATGTATGTGCATCTAAGATTATAAATATTCATTCAAAATGTAGAAAGAAATTTGTTTTGTTTAAAAAAGATAAGGGA…	MFFNHVKSYIILFILFCSYYINGRGVNRIYKNCGRKKLGNIFCCANIICVKERVKKIKHIDRWEYKRKKRKNINIFLYIPIKKDINKMKYYNFRNIVINDFFFFINKYVCASKIINIHSKCRKKFVLFKKDKGSDKSNNALKKKDKKTFSEEEIEELRKKAKEKSQANRSISEESKRKKSIEKGMKRKRYIKNQKQVKKKKSTSDEEEKKKKELKDKDDTKENVDDGDDIYLRKSKESKDKIQKDEDLNSYIGTIDDFEKISNVTKNIINEKEVEYLQKIIDCDDALLKYDKREKNVKLNIEDTIFDEGNYMEHYINNISKFRYDIYNLHNKNEFDRLTKYLNYQYVEEIPITFPTDKNYHIKLKKYFYESVCDLINKYKHRFQNYTLQQENMSDSHDK…	643	2	HMM: MFFNHVKSYIILFILFCSYYINGR, NN: MFFNHVKSYIILFILFCSYYINGR	yes	GO_0003735	GO_0003735	GO_0003735,GO_0003735	0	0	0	0	0	0	0	0	0	0	0	0	0	0	0	0	0	0	0	0	0	0	0	0	0	0	0	0	0	0	0	0	0	0	0	0	0
4732	PF3D7_1414300	60S ribosomal protein L10, putative	null	ATGGGAAGAAGACCAGCAAGGTGTTATAGGTACTGTAAAAATAAACCCTACCCAAAGAGTCGTTACTGTAGAGGTGTTCCTGACCCTAAGATAAGAATTTATGATATGGGTAGAAAGAAAGCTGATGTCAATGAATTTAGCGGTGTAGTACATTTAGTATCTTACGAATATGAACAGATATCATCTGAAGCTTTAGAAGCTGCACGTATTAGTGCAAACAAATATATGATTACCAATTGTGGTAAAGATAATTTCCACTTAAGAGTAAGAATACATCCTTTCCACGTTTTAAGAATTAATAAGATGTTGTCATGTGCAGGAGCTGATAGACTTCAAACTGGTATGAGAGGAGCCTTCGGTAAACCTAATGGTGTTGTGGCTAGAGTAGATATTGGTCAA…	MGRRPARCYRYCKNKPYPKSRYCRGVPDPKIRIYDMGRKKADVNEFSGVVHLVSYEYEQISSEALEAARISANKYMITNCGKDNFHLRVRIHPFHVLRINKMLSCAGADRLQTGMRGAFGKPNGVVARVDIGQVLLSIRTKENFVSKACEALRRAKYKFPGRQKVFVSNKWGFTPFSKDEYQQYKKKGRIISDGVSCKFIREKGPLDKIYKDINTVLES	219	0	null	no	GO_0003735	GO_0003735	GO_0003735,GO_0003735	0	0	0	0	0	0	0	0	0	0	0	0	0	0	0	0	0	0	0	0	0	0	0	0	0	0	0	0	0	0	0	0	0	0	0	0	0
4832	PF3D7_1426000	60S ribosomal protein L21	RPL21	ATGGGAGGAAAATCAAGAGGAAAAAGGTCAGGTACAAGATATAAGTTTTCTAAAAAATTTAGAAAACATGGAGAATGTACTGCAAATAAGTATTTAGAAAAATTAAATTACGGTGATTATGTTGATATAGTTTGTGATTCTACCCAACAAAAAGGTATGCCGTTTAATTATTATCATGGGAAAACAGGAAAAATATTTCACATAACCAAAAGAGGTGTTGGTGTATTAGTAAATAAAAGAGTTAAACATCGTATTGAACAAAAAAAAGTTTGTGTAAGAATAGAACATGTTAGAAAATCAAGATGTAATGAAGATTTCTTATTAAGAAAAATTAAAAATGCTGAATTAATTAAAGAAGCCAAATTAAAAAATGAACATATCAATATTAAAAGAAAAACT…	MGGKSRGKRSGTRYKFSKKFRKHGECTANKYLEKLNYGDYVDIVCDSTQQKGMPFNYYHGKTGKIFHITKRGVGVLVNKRVKHRIEQKKVCVRIEHVRKSRCNEDFLLRKIKNAELIKEAKLKNEHINIKRKTEGPKPAAMIKVPPSKIITIEPLPFYEEY	161	0	null	no	GO_0003735	GO_0003735	GO_0003735,GO_0003735	0	0	0	0	0	0	0	0	0	0	0	0	0	0	0	0	0	0	0	0	0	0	0	0	0	0	0	0	0	0	0	0	0	0	0	0	0
4884	PF3D7_1431000	mitochondrial ribosomal protein L17-2 precursor, putative	null	ATGGGATATACTTCTACCCTTAAATTCGTGAACTTAGGGGTGAGGAGGAGATTATTTAGAAGAGCTCATAAACAGCCACATCATAAATGGGATAGTATAAAAAACCAGTTGAATGAATTATTAAAATATGGAAGGATAGAAACAACTTTAACAAAGGCAAAAGAGTTACAAGGATATGCTGAGGAGTTAATTTATTTGGCTAAAAAAGATAATGTAGAAAATAATTTAAAAGTAGAAAGTATGTTAAGAACAGCACAAGGGAGAAGAAGATTATACGAATTTTATGTGCCATTATATAGACATAGACCTTTTTTTTTTACTAGGATTATTAATCAATGGAAATTACGTTTAAGAGATTCAGCACCTTTGGCTTATATCGAATTTATAGATAGACCAGGA…	MGYTSTLKFVNLGVRRRLFRRAHKQPHHKWDSIKNQLNELLKYGRIETTLTKAKELQGYAEELIYLAKKDNVENNLKVESMLRTAQGRRRLYEFYVPLYRHRPFFFTRIINQWKLRLRDSAPLAYIEFIDRPGELRPAKPVGYNKIKFIYEEMKKNRRNFRKYFNIAKRFHLLDENDHLLPDFADTGHVPEKSWYDEENEEDDDEIIINPELIQKYKKFNNPMLKGPKKGREPFYVDLPLPSVTERTFLNYRKKFKP	257	0	null	no	GO_0003735	GO_0003735	GO_0003735,GO_0003735	0	0	0	0	0	0	0	0	0	0	0	0	0	0	0	0	0	0	0	0	0	0	0	0	0	0	0	0	0	0	0	0	0	0	0	0	0
4891	PF3D7_1431700	60S ribosomal protein L14, putative	null	ATGCCACGAGTTGAATTAACAGAAGAAGAAAAATTATATATTTCTAAAAAAAATCTTTTGTTTAAAAGATTTGTAGAGCCAGGCAGATTATGCCTTATTGAGTATGGTCCATACGCTGGAAAGTTATGTTTTATTGTAGATATTGTAACCATCACTCGTGTTATCGTCGATGGAGCATTTATTACAGGAGTGCCTCGTATGGTCATCCCCTTGAAAAGATTAAAGTTATTAAAGGAAAGAATTAAAATTAACAAAAATTGTAAAAGTGGATTTTTAAGGAAAACAGTTAACAGCACCAAGGTATTAGAAGAGTTTAATAATTCAAAGTTGGGAAAGAAAATGATCATCAAAAAAAAAAGAGATGAAGCTACCGACTTCGAAAGATTCCAAGTATATTTT…	MPRVELTEEEKLYISKKNLLFKRFVEPGRLCLIEYGPYAGKLCFIVDIVTITRVIVDGAFITGVPRMVIPLKRLKLLKERIKINKNCKSGFLRKTVNSTKVLEEFNNSKLGKKMIIKKKRDEATDFERFQVYFAKRELKKKMTTIKNKKNGENKKVKKNVQKVKA	165	0	null	no	GO_0003735	GO_0003735	GO_0003735,GO_0003735	0	0	0	0	0	0	0	0	0	0	0	0	0	0	0	0	0	0	0	0	0	0	0	0	0	0	0	0	0	0	0	0	0	0	0	0	0
5118	PF3D7_1454600	mitochondrial ribosomal protein S11 precursor, putative	null	ATGAATGTTTTATCTAAAAACAAGAGCCTTGTTAATTATAAAACCATATTCTCAAGTCCCATTTACATGAATATATGCATAAACCATTTTGTAAATAAATTAATAAATGTATATTCAGCAAAAAGTCTAAAATTTACGACCCTTTCTTCAGATGCAGTAAAGGCAATAACGAATTTAAAAGAATCTGTAAAGAAGCCAGATAAAAAAAAGAAAAACATTACAAGGGAGACACTTAAAAATTGTCAAGGTCATAAGAGAAGATACAAATTATTTGGTGATAGAGAAGAATTTCATAATATAGATAGAGATAAAAATAATTTAATAATTGAACCTACAGATAGTTTTCGAGCTGTTATTACTACATCTAAAAATAATGTACATATTCAAGTTGTAAATAAA…	MNVLSKNKSLVNYKTIFSSPIYMNICINHFVNKLINVYSAKSLKFTTLSSDAVKAITNLKESVKKPDKKKKNITRETLKNCQGHKRRYKLFGDREEFHNIDRDKNNLIIEPTDSFRAVITTSKNNVHIQVVNKSKNYKTIFGSFAGNVGFTKTLQQSERCAYRIGENIAKKCRRLGIFSIDIKFRRIMRVETVLQAMYANNLNITQIIHEPRLPKCGLNASKPRKRRRV	229	0	null	no	GO_0003735	GO_0003735	GO_0003735,GO_0003735	0	0	0	0	0	0	0	0	0	0	0	0	0	0	0	0	0	0	0	0	0	0	0	0	0	0	0	0	0	0	0	0	0	0	0	0	0
5180	PF3D7_1460700	60S ribosomal protein L27	RPL27	ATGGGAAAATTATTGAAACCAGGAAAAGTTATCATAATATTAAACGGTCGTAGAGCTGGAAAAAAGGCTGTCATAGTAAACACTTATGAAGGTCAAACCCGTGAAAGACCATATAGTTACTGCTTAGTAGCTGGTATAGAAAAACATCCATTAAAAGTTAACAAAAGTATGACCAAGAAAAAAATCGTAAAAAGATCAAAAGTTAAGGCCTTTATAAAATGTATTAACGTAAATCACATCCTTCCAACAAGATACCAAGTAGCTAATGATTTCGATATTAAAAGTTTAGCATCTGATGATGTCTTGAAATCCAAAAATAAAAAGAAGGAAGTAAAAAAATTGGGAAAAATATTTAGAGACAAATTTTTGGAACCAGTTAACAAAAAAACCGGAGAGGTT…	MGKLLKPGKVIIILNGRRAGKKAVIVNTYEGQTRERPYSYCLVAGIEKHPLKVNKSMTKKKIVKRSKVKAFIKCINVNHILPTRYQVANDFDIKSLASDDVLKSKNKKKEVKKLGKIFRDKFLEPVNKKTGEVSKDISFLHKKLYF	146	0	null	no	GO_0003735	GO_0003735	GO_0003735,GO_0003735	0	0	0	0	0	0	0	0	0	0	0	0	0	0	0	0	0	0	0	0	0	0	0	0	0	0	0	0	0	0	0	0	0	0	0	0	0
5187	PF3D7_1461300	40S ribosomal protein S28e, putative	null	ATGGAAAAATCAAAATTAGCAAAAGTTGAAAAGGTTTTAGGAAGAACAGGAAGCAGAGGAGGTGTTATTCAGGTAAGGGCACAATTTATGGGAGATTCTGAATTAGCAGGAAGATTCTTAATTAGGAATGTTAAAGGTCCTGTGAGAGAAGGTGATATCTTAGCTTTATTAGAAACTGAAAGAGAAGCAAGAAGATTACGTTAA	MEKSKLAKVEKVLGRTGSRGGVIQVRAQFMGDSELAGRFLIRNVKGPVREGDILALLETEREARRLR	67	0	null	no	GO_0003735	GO_0003735	GO_0003735,GO_0003735	0	0	0	0	0	0	0	0	0	0	0	0	0	0	0	0	0	0	0	0	0	0	0	0	0	0	0	0	0	0	0	0	0	0	0	0	0
4955	PF3D7_1438000	eukaryotic translation initiation factor eIF2A, putative	null	ATGATACCAGATAATAATGAAAACAATAATAATTTATATTTCTTAGCATTTAGTAAAAATAAAGTGACGATTTATGAATATGATGTGGATTTAAGTAAAAATATTGTAGATGATATTAATGATGAAATTAAAAGATGTGAAGAGGAAGATGAGAAAAATAAAATAAATGAAAATACAGTTCCTATGACGAATGATGAAAAAAAAGTTGATATGAATCATATAAGAAATAATAATATAATAAATAATAATACAAACAATACGAATCAGATAAAAAAATCTACAAATAAATTTAATAATGATTTTGTTTTAAATCGTGGTATTAAAATATATAAGGAATATGACGATGTTGAACTAGCCACATGTACAAATGACTATAAAAAAATTATCCTTGTAAGAAAA…	MIPDNNENNNNLYFLAFSKNKVTIYEYDVDLSKNIVDDINDEIKRCEEEDEKNKINENTVPMTNDEKKVDMNHIRNNNIINNNTNNTNQIKKSTNKFNNDFVLNRGIKIYKEYDDVELATCTNDYKKIILVRKSDLNVAEIIDIKSENKNVTCIKTKTQIKRIITSPRDNYIVLHCQYKPDITNTNLYVYKLNVKSSKKKKKKDKKNSECENIKGEENSVGKENDNYEEEKKNINMNNNNVPIHNNNNNSDNNESTNDNIIYNENLIIELTLKSYSNKNWPFFKWSDSESICTCLINNQVYIYKDNNFNTTVNKLKLDNIEFFDISPELNNKKGILIATYEQGSKGNPSIFKIFHIDNLNKHIYSKNFFNSDEIKLKWNKNGSSLLLQIHTQVDKEKQS…	661	0	null	no	GO_0003743	GO_0003735	GO_0003743,GO_0003735	0	0	0	0	0	0	0	0	0	0	0	0	0	0	0	0	0	0	0	0	0	0	0	0	0	0	0	0	0	0	0	0	0	0	0	0	0
4609	PF3D7_1402500	ribosomal protein S27a, putative	null	ATGAAAATTCTTATTAATATTCCTTATGATGAGTCCTTATGTTTGGAGTCATCAAATATAAATAACATAAAAAATGTAAAAGAACAAATTTTTGAATTAAAAGGTATTCCATATGAGCTTCAGAAATTATATAAAAATGGTCGTCATTTGGAGGATGAAGAATTACTTGAAATAGATAAATCTGATTATGCATACACTTTAAATTTAAATTTCGGTTTACTTGGTGGTGCTAAAAAAAAGAAAAAGAAAGTTTACAAGAAACCAAAAAAAGAAAAACATAAGAAAAAAAAAGTAAAATTAGCTGTTTTAAAATTTTATAAAGTTGGAGATGATGGAAAAGTATTTAGATTAAAAAGACAATGTGATAATTGTGCTCCAGGAACTTTGATGGCTTCTCAT…	MKILINIPYDESLCLESSNINNIKNVKEQIFELKGIPYELQKLYKNGRHLEDEELLEIDKSDYAYTLNLNFGLLGGAKKKKKKVYKKPKKEKHKKKKVKLAVLKFYKVGDDGKVFRLKRQCDNCAPGTLMASHFDRDYCGRCHLTIMKK	149	0	null	no	GO_0005515, GO_0003735	GO_0003735	GO_0005515,GO_0003735,GO_0003735	0	0	0	0	0	0	0	0	0	0	0	0	0	0	0	0	0	0	0	0	0	0	0	0	0	0	0	0	0	0	0	0	0	0	0	0	0
4822	PF3D7_1424100	60S ribosomal protein L5, putative	RPL5	ATGGCATATGTAAAGGTTGTTAAAAATAAAGCATACTTTAAAAGATACCAAGTGAAATATAGAAGAAGAAGAGAGGGAAAAACCGACTACAGGGCTAGGAAAGCTTTAATATTACAAGACAAGAATAAGTATAATGCTCAAAAGCTTCGTTTTGTTGTTCGTAAAACAAATAGTCAGGTAATATGCCAAATAGCTTGTGCACATATTGAAGGAGATAAAATATTAGCAGAAGCAAAGTCAAAAGAATTGATAAGATACGGTATCCCTGTTGGATTAAAGAATTATGCAGCTGCTTATGCCACCGGTTTATTGTGTGCACGTCGTTTTTTAAAATCTTTAAATTTAGATACTCAATTCTTAGGTGTTGAGAAAGTAACAGGAGAAATAGAAAATAATGAA…	MAYVKVVKNKAYFKRYQVKYRRRREGKTDYRARKALILQDKNKYNAQKLRFVVRKTNSQVICQIACAHIEGDKILAEAKSKELIRYGIPVGLKNYAAAYATGLLCARRFLKSLNLDTQFLGVEKVTGEIENNEDKEDEEGRKPIKAFLDVGITRTTTGNRVFAALKGACDGGLNIPHGNNRFPGSKNEFNPEQLRKNILGIHVAEYMKTLQEEDNDKYKTHFNDYLKNNIGADDIEQMYLNAHEKIRQNPEKESKDTKNVKKFVSKHEKPKKLNAKLRKKRVKEKLALYVEKLQ	294	0	null	no	GO_0008097, GO_0003735	GO_0003735	GO_0008097,GO_0003735,GO_0003735	0	0	0	0	0	0	0	0	0	0	0	0	0	0	0	0	0	0	0	0	0	0	0	0	0	0	0	0	0	0	0	0	0	0	0	0	0
5313	PF3D7_1474100	mitochondrial ribosomal protein L20 precursor, putative	null	ATGAAATTACCAAGAGAAGTTGTTTTTCAAGTTGCCAAAGGATTTAGAGGAAGGAGTAAAGGATGTTTTAAAATAGCAAGGAGTAGAGCAATGAAAGCTTTGTTATATTCTTATATAATGAGGCGTCAAAAATATAGGAGATTAAGAGTTCATTGGATTGCTAGTATTAACCGGGCATGTAGAGAATGGAAGTTTACATATGCTCATTTTATGAATAGTTTACTTAACAACAATATTTTGTTAAGTAGAAAAAGTTTGTATAATTTATGTTATACGGAACCTATTAGTTTTAAGTGTTTAATTGATGAGTCAAAATTTCTTTATTTCCAGAGAAAATTGAAGTATCGTGATATATCACAGCTGTGA	MKLPREVVFQVAKGFRGRSKGCFKIARSRAMKALLYSYIMRRQKYRRLRVHWIASINRACREWKFTYAHFMNSLLNNNILLSRKSLYNLCYTEPISFKCLIDESKFLYFQRKLKYRDISQL	121	0	null	no	GO_0019843, GO_0003735	GO_0003735	GO_0019843,GO_0003735,GO_0003735	0	0	0	0	0	0	0	0	0	0	0	0	0	0	0	0	0	0	0	0	0	0	0	0	0	0	0	0	0	0	0	0	0	0	0	0	0
1909	PF3D7_0815600	eukaryotic translation initiation factor 3 subunit G, putative	EIF3G	ATGATACAAACAGAGAAAAAATGGGCAGATATTGATGTAGATGATGATGAATCCATAAATGATAATGAAATAAAAAAAAAATGGGAAGATATAGATGCAGATGATGACTTAGAAGCGAATAAAAAATTATCATATTTCACAAATTATGAAAATGGAATAAAAGTTGTTACAAAATACTCGGAAAATTTAAAAAAACAGACTGTTAAAGTTACCAAAAAAATTCAAGAAGTTGTGATTAAAAAAAAATTAAACAAAGAAATAAATAACAGACTTAACCTAAAAAATTTTAACATTGATATACATAGCTCAGTCACTGTTGAACCAACAGATGTCGTTAATATTGAAGTTCCTAAAAACAATCCATTAGATTTTTTAAAAGATACCGAATATGATTATTTA…	MIQTEKKWADIDVDDDESINDNEIKKKWEDIDADDDLEANKKLSYFTNYENGIKVVTKYSENLKKQTVKVTKKIQEVVIKKKLNKEINNRLNLKNFNIDIHSSVTVEPTDVVNIEVPKNNPLDFLKDTEYDYLFAEQTNKTAKDLKNRFKILKDEETEDVKAEDPSKAAGRREGLYYRPHDTQNKECTVRVTNLSEDVNENELSNLFGKVGNIVRMFLAKHKETQNSKGFAFITYSKREEAKRAIEKLNRHGFENLLLSVEWAKPSNR	268	0	null	no	GO_0003676, GO_0003743	GO_0003743	GO_0003676,GO_0003743,GO_0003743	0	0	0	0	0	0	0	0	0	0	0	0	0	0	0	0	0	0	0	0	0	0	0	0	0	0	0	0	0	0	0	0	0	0	0	0	0
1716	PF3D7_0728000	eukaryotic translation initiation factor 2 subunit alpha, putative	null	ATGACTGAAATGCGAGTAAAAGCAGATTTGGGGGACTGTCGTTTTTATAAAAAGAAGTTTCCCGAGGTTGATGATTTGATTATGGTTAAGGTTAATAGAATTGAGGATATGGGAGCTTACGTTTCTATATTGGAATATAACGATATGGAAGGTATGATTTTAATGTCCGAACTATCCAAAAGAAGATTCAGAAGTGTGAACAAATTAATACGTGTAGGTAGGCATGAGGTTGTACTTGTATTAAGAGTAGATAGCCAAAAAGGATATATCGATTTATCAAAAAGGAGAGTATCACCAAAAGATATAATAAAATGTGAAGAAAAATTTTCTAAATCTAAAAAGGTGCACCAGACTGTGCGACATGTAGCAAAAGAACATGGCATTACTGTAGAAGAGCTA…	MTEMRVKADLGDCRFYKKKFPEVDDLIMVKVNRIEDMGAYVSILEYNDMEGMILMSELSKRRFRSVNKLIRVGRHEVVLVLRVDSQKGYIDLSKRRVSPKDIIKCEEKFSKSKKVHQTVRHVAKEHGITVEELNEKAIWPLYERYGHALDALKEATMNPENVFKGLDISEEIKNSLLKDIKLRLTPQALKLRGRIDVWCFGYEGIDAVKEALKKGKEISNDKVSINIKLIAPPQYVIVTSCHDKDLGMAKIQEAMKVISDKIKEYKGGDFKQQGEILVIGGDEEKRLEELLDKHDGISSDDDDYNTSDEDDENSSEEDENTSEDEEEED	329	0	null	no	GO_0003723, GO_0003743	GO_0003743	GO_0003723,GO_0003743,GO_0003743	0	0	0	0	0	0	0	0	0	0	0	0	0	0	0	0	0	0	0	0	0	0	0	0	0	0	0	0	0	0	0	0	0	0	0	0	0
3293	PF3D7_1143400	translation initiation factor eIF-1A, putative	null	ATGCCAAAGAATAAAGGAAAGGGAGGTAAAAACAGAAGGAGAGGAAAGAATGATAACGAAGGAGAAAAAAGAGAATTATTATACAAGGAAGAAGATCAAGAATATGCTCAAGTTTTAAGAATGTTGGGTAATGGTAGATTAGAGGCCCATTGTTTTGATGGTGTCAAAAGATTGTGTCATATTAGGGGTAAAATGAGAAAAAGGGTATGGATTAATTCAGGTGATATTATTTTAGTGTCCTTAAGAGATTATCAAGACAGTAAAGCTGATGTTATAGCAAAATATACTCCTGATGAGGCAAGAAGCTTGAAGGCTCACGGAGAATTACCAGAAACAGCAAAAATAAACGAAACAGACATTTTTGATGACGATGGACAAAATGGAGTGGAATTTTTGGAT…	MPKNKGKGGKNRRRGKNDNEGEKRELLYKEEDQEYAQVLRMLGNGRLEAHCFDGVKRLCHIRGKMRKRVWINSGDIILVSLRDYQDSKADVIAKYTPDEARSLKAHGELPETAKINETDIFDDDGQNGVEFLDDESDEEAQEEMNNARRLDIEDI	155	0	null	no	GO_0003723, GO_0003743	GO_0003743	GO_0003723,GO_0003743,GO_0003743	0	0	0	0	0	0	0	0	0	0	0	0	0	0	0	0	0	0	0	0	0	0	0	0	0	0	0	0	0	0	0	0	0	0	0	0	0
3399	PF3D7_1204300	eukaryotic translation initiation factor 5A	EIF5A	ATGTCAGATCATGAAATGTACGATAATATTGATGCTGGAGCATCACAAACGTACCCTGTGCAAGCAGGTGCAATAAAAAAAAATGGTCATGTAATGTTGAAAGAGCATCCATGTAAGGTGGTTGATTATTCCACATCAAAAACAGGAAAGCATGGTCATGCAAAAGCACACATTGTAGGTATAGATATATTTACAGGAAGGAAATATGAAGATATATGTCCAACATCTCATAATATGGATGTACCTGTTGTAAAAAGAACTGAATTACAATTAATTGATATTACAGAAGATGGTTTTGTGTCTCTTTTATATGATAATGGAGATACCAAAGATGATTTAAGTTTACCAAAAGATACCGAAGGAAACTTAGATGAAGTAGCTAAACAAATACGAAATTTA…	MSDHEMYDNIDAGASQTYPVQAGAIKKNGHVMLKEHPCKVVDYSTSKTGKHGHAKAHIVGIDIFTGRKYEDICPTSHNMDVPVVKRTELQLIDITEDGFVSLLYDNGDTKDDLSLPKDTEGNLDEVAKQIRNLFDNGKSVLVSVLSACGQEKIIAAKELSS	161	0	null	no	GO_0003723, GO_0043022, GO_0003746	GO_0003743	GO_0003723,GO_0043022,GO_0003746,GO_0003743	0	0	0	0	0	0	0	0	0	0	0	0	0	0	0	0	0	0	0	0	0	0	0	0	0	0	0	0	0	0	0	0	0	0	0	0	0
2539	PF3D7_1007900	eukaryotic translation initiation factor 3 subunit D, putative	EIF3D	ATGTCGAGTTTTAATTTGGTCGGAGTCATTAATAACAGAACGTGGGGACCTGATTCAAAAAATGAGGAACTTGTAAATTATTGTATGCCGGACATAAAAAAATATCAATTTGAACCTTCTATGAAATTTGAAAGGATAGGAAAAGTATGTGATTTTACTATGAATAGTTATCAAAAGAATACGAAGGATATAAATAAAAATTCGAATGATGTTAATGCGTTTGAAGAAGAGTTACAATTTCAGACGGTGGATTTACGTACAGGTCAAAAACAGAAAGGTAGTATATTTAATAAGAAAAAGATACATAATAAACAAAATACTACACAAGCCTTTACACAGAAACAACAAGAAGAAGATAATTTATATAGTAGTAGAATAAAAACAGCTGAACAAAAGAAA…	MSSFNLVGVINNRTWGPDSKNEELVNYCMPDIKKYQFEPSMKFERIGKVCDFTMNSYQKNTKDINKNSNDVNAFEEELQFQTVDLRTGQKQKGSIFNKKKIHNKQNTTQAFTQKQQEEDNLYSSRIKTAEQKKQKLLQQAKTARINARHRIFTEWSIEPTPLWTVECEIMFNELPKKIIKIDNLKVEDLFFKGKSLFYDKKIENINVKNPPLLFHHTKEGINLIPKTKEDHNLINILNNENKNKIISNEEDPNNINNIIVISTDQILSCLMSCVQSKYSWHLLIKKKGNQIIIDKDDDSIIDLLTVNENSIDAPTQDNENKINSLQALGIEAVKINQRFRKQVILKNDIAEEFEPGNFNIKNIKINDILYRYRKFQIPPLVQSNNKKTYTLITRGEIHS…	543	0	null	no	GO_0003743	GO_0003743	GO_0003743,GO_0003743	0	0	0	0	0	0	0	0	0	0	0	0	0	0	0	0	0	0	0	0	0	0	0	0	0	0	0	0	0	0	0	0	0	0	0	0	0
3777	PF3D7_1243600	translation initiation factor SUI1, putative	null	ATGAACCTCGCTATACAGAATCTTGGTATTAATGACCCCTTTACAAATGAAAATATTGTCGATAAGGGGAATGGTAAATCCAACGCGACGAATTTAATACATATTAGAAATCAACAAAGAAATGGTAGAAAAAGTGTTACTACAGTACAAGGATTAGGAAAAACATTTGATTTGAAAAAGATGGTTAGAGCCTTAAAAAAGGAATTTAATTGTAATGGAACAATTATTGAAGATATTGAGCATGGTTCAATTATTCAACTTCAAGGCGATAAAAGAAACAACGTTAAAGAGTTTCTAATAAGAGAAGGAATTTGCGCATTAGAGCACATACGTATACACGGTGCTTAA	MNLAIQNLGINDPFTNENIVDKGNGKSNATNLIHIRNQQRNGRKSVTTVQGLGKTFDLKKMVRALKKEFNCNGTIIEDIEHGSIIQLQGDKRNNVKEFLIREGICALEHIRIHGA	115	0	null	no	GO_0003743	GO_0003743	GO_0003743,GO_0003743	0	0	0	0	0	0	0	0	0	0	0	0	0	0	0	0	0	0	0	0	0	0	0	0	0	0	0	0	0	0	0	0	0	0	0	0	0
765	PF3D7_0418200	eukaryotic translation initiation factor 3 subunit M, putative	EIF3M	ATGTCCATATATATTCAGCTAACGCATGACTTGTCAGGTACTGTGACTGCTGTGACGATTGGGGATTGGATATTAGGAATATTGAAAGAGAAGAATATTCAAGAGTATGAAGTGTTTTTTAAAAAGTTTTTGCATATTTATCAGAAGCAAGATAAAGATTCAGAATGTAATAATAGATCTGAGATATTTTCTTTATTATTATCAGCAAGTGATTTTGTATTTGAGACGTTAGTAGAAACTAAAAAGAATAATAAGATAAAAGTAATAATAGATAATAAAGAGAGTGTAAAGAGTTATAATGAGTTTTATAAAGAAGTTGAAGAATATTTTGTAATATTAATATCAATATTACAATTAGAATTTAAGAGTGTTGAAGAATTAAATAATGCTACAAATAAT…	MSIYIQLTHDLSGTVTAVTIGDWILGILKEKNIQEYEVFFKKFLHIYQKQDKDSECNNRSEIFSLLLSASDFVFETLVETKKNNKIKVIIDNKESVKSYNEFYKEVEEYFVILISILQLEFKSVEELNNATNNFIKAIKNYNEFPELRLKILQLLYNSFNVNFSFRFPTFIAILQFCSQNNIFHNMLPYIKYIDDWIKEWNISTREKRHIYLIISQELKKLKKYEESYEHLKKHIYYYDNEHKDILNHPNSINASIELIVDAININNNIYFHEIINLHAIQNLQFIPQHQPLFDLLLIFYKYTINEFLVFKNKHGSDFFNKYNIDIQTCESKIYLLSIISLFNDHKVQNIQFISKQLNISVVQIENILVAAIGSGVIDAKIDQINQTVHMKTTILRNFD…	429	0	null	no	GO_0005515	GO_0003743	GO_0005515,GO_0003743	0	0	0	0	0	0	0	0	0	0	0	0	0	0	0	0	0	0	0	0	0	0	0	0	0	0	0	0	0	0	0	0	0	0	0	0	0
1611	PF3D7_0716800	eukaryotic translation initiation factor 3 subunit I, putative	EIF3I	ATGAAGAGGAAATATTTGTCAGGACATAATCGTCCCTTAACACATGTAAATACAAATTATGATGGTGATTTGCTATTTACAACAGGAAGGGATAAAAAGTTCATATTATGGAGAGTTTCAGACGGGACACAAATAGGATTATATGAATGTAGTGGGGCTGTGTATAACTCAGATGTGACATATGATAGCAAGAGAATTGTGTGTTCGTCTGCTGCAAACAAGGTTTATTTATTTGATGTATATACAGGAGAACCTTTAAAAATAATTGAAGAAAATGGTCCGGTGAGATTTGTCGAATTTAATAAGGATCCATTAAATCAGGATAAAATAGTGGTAGCTCATGATAGATTAAAATCAGATCATAAAAGATCGATTAAATTATATGATTTAAAAAGTGAC…	MKRKYLSGHNRPLTHVNTNYDGDLLFTTGRDKKFILWRVSDGTQIGLYECSGAVYNSDVTYDSKRIVCSSAANKVYLFDVYTGEPLKIIEENGPVRFVEFNKDPLNQDKIVVAHDRLKSDHKRSIKLYDLKSDNLIWKQDHESRCIQVRWCFFDKLILSAHENGEIVVWNAEDGHLIRKFQAHSKEVTNLSFDKDRMLMLSSSLDGTAKLRDGVNFEIINEYKTDRPLNTCDISPLFKNENNPKNHIILAGGQAAEHVTTTASGEGKFQTLLYDIIHSNELGSIKGHFGPVHSIKFLPHGDGFVSGGEDGFARIYHFDNDYFIGKYD	327	0	null	no	GO_0005515	GO_0003743	GO_0005515,GO_0003743	0	0	0	0	0	0	0	0	0	0	0	0	0	0	0	0	0	0	0	0	0	0	0	0	0	0	0	0	0	0	0	0	0	0	0	0	0
2264	PF3D7_0918300	eukaryotic translation initiation factor 3 subunit F, putative	EIF3F	ATGAGTATTAATCGATATAATTATAAAACAATGAATAGTTTATTGAAGGATAAAATCCCTCAACATTTTGACATCTTACCTCATACGACGATAAAATGTATTATTCATCCTTCTGTTATTTTTACCATTTTAGATGCATATTTAAGAAGAGATGAAGATCAAACGCATGTGATAGGAACATTAATGGGTTCAGTGATTGATACGAACCTGGTTGAAATTTCGGATTGTTTTGTCGATAAGCATTCATTAAATGAAGGAGGTTTTTTACAAATAATTAAAGATCACCATGAAACGATGTATGAGTTGAAACAAAAAATACGTCCAAGAGATCAAGTTGTTGGATGGTTTTGTTCAGGTTCTGAATTATCTGAACTTTCATGTGCTGTACATGGATGGTTC…	MSINRYNYKTMNSLLKDKIPQHFDILPHTTIKCIIHPSVIFTILDAYLRRDEDQTHVIGTLMGSVIDTNLVEISDCFVDKHSLNEGGFLQIIKDHHETMYELKQKIRPRDQVVGWFCSGSELSELSCAVHGWFKEHNSISKFYPHTPLNEPIHLLVDASLESGFLNIKAYVQLPISLVKDYFVHFHEIQTELLPCNVERADVSLVKGNIHAHKDNHTNNLEHNHNNNQIDMNELSLKKLLIMLKQCKSYVQDVIDQKKKGNISVGRYLHKVLSNDTFLTLEKFDSINESVLQDNLMISYLSNLANLQFLIAEKLNSSSLQ	320	0	null	no	GO_0005515	GO_0003743	GO_0005515,GO_0003743	0	0	0	0	0	0	0	0	0	0	0	0	0	0	0	0	0	0	0	0	0	0	0	0	0	0	0	0	0	0	0	0	0	0	0	0	0
3483	PF3D7_1212700	eukaryotic translation initiation factor 3 subunit A, putative	EIF3A	ATGCAAACGTTTCAGAAACCAGAGAATGCTCTTAAGAGAGCAGAAGAATTACAATTTATTGGTCAGAATGAAGATGCTTTACAAATACTTCACAGTGCTATTGGACATAGGACATTTCGTTTACAAGGATGGCATATATTACAAGAACAGATTATGTTAAGATATATTGAATTTTGTTTGTATTTAGAAAAGTTAAGTTTAGTTAAGGATGGTTTACATCAGTATAGAATAATTTGTCAACATGGAAATATTGCTTCTTTAGGTAAAGTTATTACAGATTTTAGGGATAAAGCTGAAGAGAAGGTGAGATTAGCGAAAGAAAATGTTGTTTTAAATAAAGAGAAAATTGAACAAGAAGAAAGTAATGTAGATGTGACAGAAAAAATATTAATGGCTTCT…	MQTFQKPENALKRAEELQFIGQNEDALQILHSAIGHRTFRLQGWHILQEQIMLRYIEFCLYLEKLSLVKDGLHQYRIICQHGNIASLGKVITDFRDKAEEKVRLAKENVVLNKEKIEQEESNVDVTEKILMASLDIEITGKHERKLQNAYRICMETYKMILEILRATPKLEKAYHETAKKAILFCKENKRVTEFKKLSDLLRNHYNLILRGKHKPEYQSLLKIEYHLETKIIQLEAACELAMWKEASNIAEDIYNLNMHDYFYKSLKSNIMMEPELVSVIDTVKSGDKNEEEKNKVNDVDADAKAKEDILKGVEQQDNNVENNNNNNNNNNDNNNNNNNNNNNNNNNNKEDEEDGKIQSGDTITKTTDGNVGTGHNTSHSLNQSKEKLRNWIAIFYEKM…	1377	0	null	no	GO_0005515	GO_0003743	GO_0005515,GO_0003743	0	0	0	0	0	0	0	0	0	0	0	0	0	0	0	0	0	0	0	0	0	0	0	0	0	0	0	0	0	0	0	0	0	0	0	0	0
3417	PF3D7_1206200	eukaryotic translation initiation factor 3 subunit C, putative	EIF3C	ATGCAATCGAAATTTTGGGCCAAGGCAATTGATGAAGATAGTGGGGATAATGTAACAGAATCTTCAGAGAGTGAAGTTGAGGAAAAGAAGCCCATTGTCTCTGCACAGGCAGAAAGGTGGGCCGCCATAGATAGCAGCAGCTCAGAAGAAGAAGAAAGAGTTATTAAAACATATGAAGGGAAAAGGCTACATTTTTATGAGACTACAGGAAATAGTTTAAATGAGAATATGTATAATAATGATTTTAATCTTCTTTTAAAAGATTATGAAAATTTATATAAATTTATGATAAAAGAAAGCGCTGATTGTATCCCTAATTTTGCTATAATATACTTAGATAAATTATCTAAATATGTTGAAAAAACATTCCAGAATAATGTCGAAAAAAAAAATTTGAGC…	MQSKFWAKAIDEDSGDNVTESSESEVEEKKPIVSAQAERWAAIDSSSSEEEERVIKTYEGKRLHFYETTGNSLNENMYNNDFNLLLKDYENLYKFMIKESADCIPNFAIIYLDKLSKYVEKTFQNNVEKKNLSKNKAQTLNKLRAKIRKCSEFYQEKLNLYNENPDDFKDDRKKDMDDDEDDEDNEEDDEEEEEDEEEQEDQDDDNEDEKDQDDDEDGKGKKKLSSKTKSKKGKEKKEEKEDYDDDNDEEKEDEADDDNDDDDDDSDDWSYSEDDNYASDEEDDKTKNAMSKWGLKTSTKVEKKKTVKQKKVKKESTKKEEKANRVVEDSQSAKNKGYAELLSTKNLTEDVIRERVKLVIEKRGRKGLDKHEHINILSKLCEIAKTISTQSYIEVLEHL…	984	0	null	no	GO_0005515, GO_0003743, GO_0031369	GO_0003743	GO_0005515,GO_0003743,GO_0031369,GO_0003743	0	0	0	0	0	0	0	0	0	0	0	0	0	0	0	0	0	0	0	0	0	0	0	0	0	0	0	0	0	0	0	0	0	0	0	0	0
1211	PF3D7_0607000	translation initiation factor IF-2, putative	null	ATGAGTAAAAATAAAAAGGGAAAAAAGAAGGAAGATCTCGATGCTATTCTGGCCGAATTAGGAATAGAAGAAAAAAGAGAAGATGACGTAAAAGCAAATGAAAACGAGGAAAATGAACCTACCAAAATGTCCAAGTCCAAAAAGAAAAAGGAAAAACTCAAACAAAAAAAAGAACAAATGAAAAATAAAGAAGATGATGAGAAGGATGATCAAAAAGGTATAGATGGTGAAAAAGATACAGACCAAAAAAAAGATCAGGATGACCAAAAAGATGATGATAACCAAAATGAAGCGGATAACCAAAATGAAGCAGATAATCAAAATGAAGGTGAAAACCAAAAAAAGAAAAAAAACAAAAAGAAAAAAGATAAAGAAAAAAAAGCTGGTGGAGCAGCAGGA…	MSKNKKGKKKEDLDAILAELGIEEKREDDVKANENEENEPTKMSKSKKKKEKLKQKKEQMKNKEDDEKDDQKGIDGEKDTDQKKDQDDQKDDDNQNEADNQNEADNQNEGENQKKKKNKKKKDKEKKAGGAAGAATGGMSEIAKAAAERLRLLKEYEEKKKEEERLKKEEEEERIRKEEEEKEKKRIAKLEKKMQLKKEGKLLSAKAKEEKKKNEIYLKQLKESGMLIEPREKSKSEYINLDINKTKLLLKKKKTKSIMVPTSSNNNNLNDDDKNNKQMLSNSSLKLNEEDELQGSQKVDEKDIVLDNWEDFLHIDEAKKKEQEEIERKEKERKEKEKEEREKERKSVINNSSSSINYGRKSFHIKNDILMRKGNKKKIDNELDDDDNNEYRSAIVCIL…	977	0	null	no	GO_0005525, GO_0003924	GO_0003743	GO_0005525,GO_0003924,GO_0003743	0	0	0	0	0	0	0	0	0	0	0	0	0	0	0	0	0	0	0	0	0	0	0	0	0	0	0	0	0	0	0	0	0	0	0	0	0
2023	PF3D7_0827100	translation initiation factor IF-2, putative	IF2c	ATGAACAAGATAAAAATAAGAAAATTTGAGGATCCACATGTTTGGATATATGAAAATGTATTATTAAATAAAACATTGAAATTAAAAGAAATCGAAAAAAAGAAAGATAATAAAAATGTTCCAAATGCATTATTGCATGAAGAAGCTTGTAAGAAATTAAAAGGCATATTAAAAGAATGTAAAAAATATGACAAAGAATTACAAGAAATTAAGAATAAAAAAGAATCCTTTATATTAAAGAATACTTTACATCCAAATAAAAAAATTAATTTAAAATTTTTATTGAATGATAATCAATTTAAAGTAAAAAATGAGGAAGAGAGGAAAAATTTTAAATTAATTTTTAACGAAAATAAAAATATCTATATTAAGAATAATCAAAAAGTATATAATAATATA…	MNKIKIRKFEDPHVWIYENVLLNKTLKLKEIEKKKDNKNVPNALLHEEACKKLKGILKECKKYDKELQEIKNKKESFILKNTLHPNKKINLKFLLNDNQFKVKNEEERKNFKLIFNENKNIYIKNNQKVYNNIINIKRNSQITSTNNMNNNNNNVNINNDNIQPTNNLLNNIKKIQKEKISKLYSVFNNHVNYYDNYLKEKYMKEEYLSNVKYEYVSPHRHNYNDHDIKPDVIYKEDSNVSNTTHNNHNNNNNNNNNSKNKNNFSSSISSSDLLYHTNLGKNNSVSGTNLKLNVHTNNIHILDNKQCYDTLHHNNAYSHDIYGNQENVNTPKDKYITKINNKNVEDMKNVTNNIIFNKLNINNENTQKIFLYNRNDKEHESIKNDKNNSKDYPFDYKKE…	1397	0	null	no	GO_0005525, GO_0003924	GO_0003743	GO_0005525,GO_0003924,GO_0003743	0	0	0	0	0	0	0	0	0	0	0	0	0	0	0	0	0	0	0	0	0	0	0	0	0	0	0	0	0	0	0	0	0	0	0	0	0
548	PF3D7_0319600	elongation factor 1-delta, putative	EF-1delta	ATGGCAAATACGTATGATGAATTATATGTACCTTTAAGTTATTATATTCTACAAAATGAGGGAGGAAATACCAGTAAAATAGATCAAGCTAATACTAAGAAACCCAAAAAGAAGGAAGTTATTAATAAGTCATCCCTAATTATTGATATAAAACCCTATGGTGAAAATACAGATCTTGATGAGGTGTTAAAACTTGTAAAAAATATAACAATGGAAGGATTAACTTGGGGAAAAGCTCATAAGAAAACACCCTTCGCCTTTGGACTTTTCAAATTACAAGTATCTTGTGTTATAGTAGACGATTTAGTTAATACAGATGAACTTATAGAAACGATTGAAAACCTTGGATTGGATAATGAACAGTTACAAAAGAAAAAACAAATGGATGATGATGAAGAA…	MANTYDELYVPLSYYILQNEGGNTSKIDQANTKKPKKKEVINKSSLIIDIKPYGENTDLDEVLKLVKNITMEGLTWGKAHKKTPFAFGLFKLQVSCVIVDDLVNTDELIETIENLGLDNEQLQKKKQMDDDEENYDEDDEIGGLVQSAEIISFNKL	156	0	null	no	GO_0003746	GO_0003746	GO_0003746,GO_0003746	0	0	0	0	0	0	0	0	0	0	0	0	0	0	0	0	0	0	0	0	0	0	0	0	0	0	0	0	0	0	0	0	0	0	0	0	0
93	PF3D7_0110100	selenocysteine-specific elongation factor selB homologue, putative	null	ATGATAAATATTAATGTAGGTGTTTTAGGACACGTTGATTCTGGAAAAACGAGCCTCTGTAAATGTCTGAGCCAAGTTTTAAGTACATGCGCCCTAGATAAACATAAAGAAAGCAAAGAAAGAGGCATAACGATCGACCTTGGTTTTTCTTCTTTCTATATAAAGAAAAAAAAAAAAAAAAAATATGATGTAAATCAAAAGAGGGAAATCCAAACAAATTTACTAAATGATCAAACAACTGATCAAAAGGAATCTTTTTTATATTGTAAAAGAGAAGAGAAAAATGATTTACATAATATACAATATGATAAAACAAATATTGAATATAATGAAGAACAAAATTGTTATGACTATACAAATGATAAACATCATTCTAATAATATATACTTTTATGATGAA…	MININVGVLGHVDSGKTSLCKCLSQVLSTCALDKHKESKERGITIDLGFSSFYIKKKKKKKYDVNQKREIQTNLLNDQTTDQKESFLYCKREEKNDLHNIQYDKTNIEYNEEQNCYDYTNDKHHSNNIYFYDEEIIQICLVDCPGHHSLLKSIIMGSEITDIIILVIDINKGIQKQTIECLVLCKIINCDIIIVLNKIDLIPLHLREKKINLMKKKIQEAFYKFKSLQSLNYHIVSISANVKGKDNKDVEGDPPNLLSHDKKGVKILLSGDNKDLPILLSDDKKDPPILLNDDKKDPPNLLNDDKKDPPNLLNDDKKDPPNLLNDDKKDPSILLSDDKKDPPNLLNDDKKDPPNLLNDDKKDPSILLNDHMNEWSQNKSSSDIPFMNKTINIKEIINVL…	934	0	null	no	GO_0005525, GO_0003924	GO_0003746	GO_0005525,GO_0003924,GO_0003746	0	0	0	0	0	0	0	0	0	0	0	0	0	0	0	0	0	0	0	0	0	0	0	0	0	0	0	0	0	0	0	0	0	0	0	0	0
1165	PF3D7_0602400	elongation factor G	EF-G	ATGATAAAGCTATTTTCATCAAAAAGATATAATAATAATAATAAAATATTATTATTTTGCTTAGTAATATTGATATTATATAAATATACATATTCATTACACAATAGGTGGAATAAGAATAATAATGTGTATTTATCTAATGGAAAAGTAAAAAGAGAGAAAAGAAATGGTCGAGGTAAATTATATATTTTAAATAGATATGTAAGAAATGATATTATAAAACCACATAAGAATATAATTAAAAATATATTTCGTTTAAAATTAGTTAATGGTTCAACAAAAAATGTGGAATTAGAAAATTATCGAAATATTGGAATTATAGCACATATAGATGCAGGGAAAACTACAACTACTGAGAGGATATTATATTATACAAATGTTATAAAAAAGATTGGAGAA…	MIKLFSSKRYNNNNKILLFCLVILILYKYTYSLHNRWNKNNNVYLSNGKVKREKRNGRGKLYILNRYVRNDIIKPHKNIIKNIFRLKLVNGSTKNVELENYRNIGIIAHIDAGKTTTTERILYYTNVIKKIGEVHEGLSTMDYLDIEREKGITINAAVTTCYWNGSEKNLEDYRINIIDTPGHVDFTAEVEKSLRVLDGGVVVFDSSEGVESQSETVWKQANQYNISRIIFLNKLDKVGANFEGCIEEIKRKLNKKILILYVPVFEMSKFISTIDILKEKMIVYKNAHDFIFEDIPKEHYNLFLKYKNLLFEQIAENFNSFLDNYLNDKAMNIQEIEYYIRKLVVEEKYNVVMCGSALKNKNVQMLLDMVVKYLPSPIDSIKNYKKQIIYIHDVNRRGE…	937	0	HMM: MIKLFSSKRYNNNNKILLFCLVILILYKYTYSL, NN: MIKLFSSKRYNNNNKILLFCLVILILYKYTYSL	yes	GO_0005525, GO_0003924	GO_0003746	GO_0005525,GO_0003924,GO_0003746	0	0	0	0	0	0	0	0	0	0	0	0	0	0	0	0	0	0	0	0	0	0	0	0	0	0	0	0	0	0	0	0	0	0	0	0	0
3700	PF3D7_1235400	tetQ family GTPase, putative	null	ATGTTTAAAAGAGTTTACGTATATAAAAATTCCTTTTGGAAATATAAAAAACGATTTTTTAGTAAAAAATTAGTAAACATAGGGATTTTGGCACATATTGATGCAGGGAAAACAACAATATCTGAAGATATATTATATCAATCTAAAGAGATAAAGGTTAAGGGTAATATAAATGATCAGAATACGCAATTAGATTTTTTAAAACAAGAAAGAGAAAGAGGAATTACTATTAAAAGTGCTTATTCATGTTTTGAATGGAATAAAATAAAAGTAAATTTAATTGATACACCTGGACATATAGATTTTAGTAATGAAACCTTTATATCATTATGTGTATTAGATAAATGTATTATTGTTATAGACTCTAAAGAAGGTGTACAAATTCAAACGATAAATATA…	MFKRVYVYKNSFWKYKKRFFSKKLVNIGILAHIDAGKTTISEDILYQSKEIKVKGNINDQNTQLDFLKQERERGITIKSAYSCFEWNKIKVNLIDTPGHIDFSNETFISLCVLDKCIIVIDSKEGVQIQTINIFRYIKENLPIYFFLNKMDINHIDIDSNFLSIKNRLTKKGLLITYPIYENKKLKYILDIPSMVLYSYPHINYGQTFMYNSYFLKTLLEGSLYEKKLYSHFAMINPKPDNLSKENKNKNNINIANVLNDDIIDYIIKKREEIIEILCDLDNTIEYKYLNNIPISYEHFKNSLSLCIDKKYIFPIFSGSALHSYGVHILLDYITHNEKGMEKGMEKGMEKGMEKGMEKGMEKGMEKGMEKGMEKGMEKGMEKGMENEMEMDMEKKMEKE…	1161	0	null	no	GO_0005525, GO_0003924	GO_0003746	GO_0005525,GO_0003924,GO_0003746	0	0	0	0	0	0	0	0	0	0	0	0	0	0	0	0	0	0	0	0	0	0	0	0	0	0	0	0	0	0	0	0	0	0	0	0	0
4443	PF3D7_1357100	elongation factor 1-alpha	null	ATGGGAAAGGAAAAAACACATATTAACTTAGTTGTTATTGGTCACGTCGATAGTGGAAAATCAACCACTACAGGTCACATTATTTACAAATTAGGAGGTATAGATAGAAGAACTATTGAAAAATTTGAGAAAGAATCTGCTGAAATGGGTAAGGGTAGTTTTAAATATGCATGGGTTTTAGATAAACTTAAGGCAGAAAGAGAAAGAGGTATTACCATTGATATTGCCTTATGGAAATTTGAAACCCCAAGGTATTTCTTTACTGTCATTGATGCACCAGGTCACAAGGATTTTATTAAAAATATGATTACAGGTACATCACAAGCAGATGTTGCTTTATTAGTTGTCCCAGCTGAAGTAGGTGGTTTCGAAGGTGCCTTTTCAAAGGAAGGTCAAACA…	MGKEKTHINLVVIGHVDSGKSTTTGHIIYKLGGIDRRTIEKFEKESAEMGKGSFKYAWVLDKLKAERERGITIDIALWKFETPRYFFTVIDAPGHKDFIKNMITGTSQADVALLVVPAEVGGFEGAFSKEGQTKEHALLAFTLGVKQIVVGVNKMDTVKYSEDRYEEIKKEVKDYLKKVGYQADKVDFIPISGFEGDNLIEKSDKTPWYKGRTLIEALDTMEPPKRPYDKPLRIPLQGVYKIGGIGTVPVGRVETGILKAGMVLNFAPSAVVSECKSVEMHKEVLEEARPGDNIGFNVKNVSVKEIKRGYVASDTKNEPAKGCSKFTAQVIILNHPGEIKNGYTPVLDCHTSHISCKFLNIDSKIDKRSGKVVEENPKAIKSGDSALVSLEPKKPMVVE…	443	0	null	no	GO_0005525, GO_0003924, GO_0003746	GO_0003746	GO_0005525,GO_0003924,GO_0003746,GO_0003746	0	0	0	0	0	0	0	0	0	0	0	0	0	0	0	0	0	0	0	0	0	0	0	0	0	0	0	0	0	0	0	0	0	0	0	0	0
256	PF3D7_0212300	peptide chain release factor subunit 1, putative	null	ATGGAAGACCACGATGCTAATGTAGAACAATGGAAAATAAAAAGATTAATAAAGAAACTTGAGAATGCAAAAGGAAATGGAACCAGTATGATTAGTTTGATAATTAAAAACAAAGATGAAGTTTCAAGAATTAACAAAATGCTTGCTGATGAATTGGGAACTGCTTCAAATATAAAAAGCAGAGTTAATAGACTTAGTGTTTTGTCTGCCATTACCTCAACACAGCAAAAGCTAAAGCTGTATAACAAGACGCCCCCCAAAGGTCTAGTTGTTTATTGTGGAACAGTGATCACAGAAGATGGAAAGGAAAAGAAAATGTCCATTGATTTTGAACCATTCAGGCCAATAAATACGAGTTTATATTTATGTGACAATAAGTTTCACGTAGAGGCATTAAAA…	MEDHDANVEQWKIKRLIKKLENAKGNGTSMISLIIKNKDEVSRINKMLADELGTASNIKSRVNRLSVLSAITSTQQKLKLYNKTPPKGLVVYCGTVITEDGKEKKMSIDFEPFRPINTSLYLCDNKFHVEALKELLESDDKFGFIIVDGNGALFGTIQGNTREVIRRFTVDLPKKHGRGGQSALRFARLRLEKRHNYVRKVAEVATSVFITNDKVNVTGIVLAGSADFKNDLLNSDMFDQRLFAKVIKIVDISYGGDNGFNQAIELSSEALQNVKFIQEKKLIGKFFEEIAQDTGKVVYGIDDTLKALEIGAVELLILYEGLDIIRLTTKNPVTNQTKTMHISPCDEKQESLYKENNVELEVVEKISLTDWVIGNYKKYGASLDFVTNKSQEGAQFQKG…	427	0	null	no	GO_0016149	GO_0003747	GO_0016149,GO_0003747	0	0	0	0	0	0	0	0	0	0	0	0	0	0	0	0	0	0	0	0	0	0	0	0	0	0	0	0	0	0	0	0	0	0	0	0	0
3791	PF3D7_1245100	kinesin-13, putative	KLP8	ATGTTTAAGAAAACGATGCAGCAGAAAAGACAATCTTTTATAAAGAACAAGAGTGAAGTCTATCCTCAAAAAAGCGTAAATCTTGGTAATAAAATAAAAGTGAGGAGTAAAACTATGAACAGTAAAATAAAAGTTGTGGTGAGGAAGAGACCACTGAGCGAATTAGAAAAGAAGAAAAAAGATAGTGATATAATTACAGTAAAAAACAATTGTACGCTTTATATAGATGAACCAAGATATAAAGTGGATATGACAAAATATATAGAAAGGCATGAATTTATTGTAGATAAAGTTTTTGATGATACGGTTGATAATTTCACAGTATATGAGAATACCATAAAACCATTAATAATAGATTTATATGAGAATGGTTGTGTATGTTCTTGTTTTGCTTATGGG…	MFKKTMQQKRQSFIKNKSEVYPQKSVNLGNKIKVRSKTMNSKIKVVVRKRPLSELEKKKKDSDIITVKNNCTLYIDEPRYKVDMTKYIERHEFIVDKVFDDTVDNFTVYENTIKPLIIDLYENGCVCSCFAYGQTGSGKTYTMLGSQPYGQSDTPGIFQYAAGDIFTFLNIYDKDNTKGIFISFYEIYCGKLYDLLQKRKMVAALENGKKEVVVKDLKILRVLTKEELILKMIDGVLLRKIGVNSQNDESSRSHAILNIDLKDINKNTSLGKIAFIDLAGSERGADTVSQNKQTQTDGANINRSLLALKECIRAMDSDKNHIPFRDSELTKVLRDIFVGKSKSIMIANISPTISCCEQTLNTLRYSSRVKNFKNKSTCINEEDDTNTERISILDSKGSE…	1326	0	null	no	GO_0005524, GO_0008017, GO_0003777	GO_0003774	GO_0005524,GO_0008017,GO_0003777,GO_0003774	0	0	0	0	0	0	0	0	0	0	0	0	0	0	0	0	0	0	0	0	0	0	0	0	0	0	0	0	0	0	0	0	0	0	0	0	0
3089	PF3D7_1122900	dynein heavy chain, putative	null	ATGACAAAATTTTCTGAAGGCCATTATGACATCTTAAATTTAATAGAGGTAAAGAGTAATATTCAAGAGAAAAATATACTAGGATATAGTATTGATTATACTGTAGGTGGGTTATTCTTATTTGGGGGTTTTAAAATAGATATAGAAGAGAATAATGGAATAATATGTAACGATGCTTATTTAATTCATATAAAAAACGATAAGGCAGAGTATGAAACTCTGAGTATTAAAATAAAACCATCTATTAGATGTTATCATAATTCTTGCACATTATTAGAAAATTATGTTATAATTTTTGGTGGATTGAATAGTGAAGTTCCTTTTGTTGCTTTGAACGATTTATGGGTATTTAACAGTTTAAATAAGACATTTGTTGAAATAAAATTAAAATGTAAAGAA…	MTKFSEGHYDILNLIEVKSNIQEKNILGYSIDYTVGGLFLFGGFKIDIEENNGIICNDAYLIHIKNDKAEYETLSIKIKPSIRCYHNSCTLLENYVIIFGGLNSEVPFVALNDLWVFNSLNKTFVEIKLKCKEKNKEKNLQNGINGTNEKGYISQTDDENCSDNKYGENQDYGSNDSDSKDGEDIDKDDSILDNSYVKNLRKYLKSNKSDELHSSDIPCPRYFSSLDLYIIRKNNIEEEKGFKKDEIKIIKNNIIVSNSLNYEYFSLILFGGYGGYDRSSYNDLYEFNILNNEWILRGCKGNVPSTRYGHISFIHGNNLFILGGTNAEISFNDMYSCDLKNNEWSEVDFSYSFNISKVFCRSVLVESIDRNIIFIFGGYNIISDEKGNRKIEYNNIELN…	5251	0	null	no	GO_0005524, GO_0016887, GO_0003777	GO_0003774	GO_0005524,GO_0016887,GO_0003777,GO_0003774	0	0	0	0	0	0	0	0	0	0	0	0	0	0	0	0	0	0	0	0	0	0	0	0	0	0	0	0	0	0	0	0	0	0	0	0	0
1978	PF3D7_0822500	dynein light chain 1	DLC1	ATGAGTAGAACGATGGCAAAAGAAGCTACCTTTTCAAATTGTATAAAAAATTGGGAACAGAAAAATGGGAAAAAAATATGTGATGAAGAAGAAGTTAGTTTTATTTGTAATATCCCTTTAATCGAAAAATTAGATAACAGTATTAATACATTAGAAAAATGTAAACGTTTATCCTTATCAACTAACCGGATAGAAAAATTAATACCCATGTCCGGGCTGAAAAATATCGAAATTTTGTCCCTCGGAAGAAATTGTATTAAAAAGATTCAATACCTTGAAGATATAAGTGGAACATTAAAACAGCTATGGTTATCTTACAATTATATTGATAAGCTAGATAATTTACAGTCCTTAAAAAAATTACAAGTTCTTTATATATTCCATAACAAAATAAAAAGT…	MSRTMAKEATFSNCIKNWEQKNGKKICDEEEVSFICNIPLIEKLDNSINTLEKCKRLSLSTNRIEKLIPMSGLKNIEILSLGRNCIKKIQYLEDISGTLKQLWLSYNYIDKLDNLQSLKKLQVLYIFHNKIKSIEEIDKLNTLPELVELGLKGNPIYEGKTNEYMKLLILKKLPQLKIVDNETITEKQRNDALTFEILP	199	0	null	no	GO_0005515	GO_0003774, GO_0005515	GO_0005515,GO_0003774,GO_0005515	0	0	0	0	0	0	0	0	0	0	0	0	0	0	0	0	0	0	0	0	0	0	0	0	0	0	0	0	0	0	0	0	0	0	0	0	0
2668	PF3D7_1020300	cytoplasmic dynein intermediate chain, putative	null	ATGAATTTACCAGTATACAATATGGAAAGCATATCCGAATGCGATATTTTGAAGCCCATTGATGAAAGCGAGAGAATAGAATTAGAAAATAAAATAAATGAACAGATGGTAGAATTAGAAGTAAAGAAAAAATACTTGGAAGAATTAAAAAAAAGACAACATAGTGTAAAAGAAAAGAATAATATACATTCTTTTAATAATGTTGTTGAAGAATATCCTGATCCAAATAAAATGTTATGTAATTTTTTAGAGTCGTTAGAAAATAATACTAATGATAATAATAATCATCATCATAATGATAAAGAGTCAAAAGAACAAGTTAATGACTTGTCCATTTATTCAGAATATGATTATGATAATAAAAAAAAAACAACAAAAAAGGAAAATTTTACTTACACC…	MNLPVYNMESISECDILKPIDESERIELENKINEQMVELEVKKKYLEELKKRQHSVKEKNNIHSFNNVVEEYPDPNKMLCNFLESLENNTNDNNNHHHNDKESKEQVNDLSIYSEYDYDNKKKTTKKENFTYTEQFFTHPNSMDNIMMNKSFLFQKKKNSIPNFNFHIDLFNKQTKNVIHIQPKGINYFDKSIQVDLLENNEIYLLDNHINKKINKMEKKENIEKMENIEKLGNIKKTSLCYSTEDKSEGDSKSHHKNKIKHTNDTSIHNDDKKKEIKGGNKNNEINKNLEENYNKQNGHHNYIYDENNTTFNYNDNKNNSVYVEHNDNRFNAYNNSTHLKSMNVEKKKDEILKSSSFLYFLENSSKIVERVLGEQDLFDCTYTYDNNDMLENTQDVDK…	769	0	null	no	GO_0005515	GO_0003777	GO_0005515,GO_0003777	0	0	0	0	0	0	0	0	0	0	0	0	0	0	0	0	0	0	0	0	0	0	0	0	0	0	0	0	0	0	0	0	0	0	0	0	0
4835	PF3D7_1426300	dynein intermediate chain, putative	null	ATGATTGATTACTACTATTGCTATTCCAAAAACAAAAGCGACATCGGTAAGAAGTGTTTATTTAAGAAAAGCAAGAGCCAGATAATAGGAAGGATTGAAGCAAACGAGGAATTAAAAAAGAAATATATTTATAAAGAAAATATATATTACAATGATGATAATATAAAAAAATATAGTGAGCAGTATGTAAATATTGAGAGCTTAAAATTAGAAAATAAATTTTTTTATCATAATGAAGGTGGATGGACAAAAGATGTAGATATAAGTGAACAACAAAATAAGATAAAATATATTAAGAGATTAGATAAAGATATAAATTTAATTAATAGTTTAAAAATATTAATGAATGAAACAACAAAAATATTAAATAAAAATAATAGTATAAATATATATGAAGAA…	MIDYYYCYSKNKSDIGKKCLFKKSKSQIIGRIEANEELKKKYIYKENIYYNDDNIKKYSEQYVNIESLKLENKFFYHNEGGWTKDVDISEQQNKIKYIKRLDKDINLINSLKILMNETTKILNKNNSINIYEEYFKNDLQNEENFKIKSILVIKDTMRKYQRFITSIKWSTDNTYKLAISYCVNDYQKILHNSPKNCLLYNLNQINNPYQTLYSKTFIKCMRFNHKNSDLLLAGSYDGTVNLWDLRKKNTLCESSSINVSHKNTVHDIIWLQTKTNNHCLSISSDGLSLIWDIRNFAEPIESFYLNKDPSEICELVETANNELHDLSKISNDINNNNNNNNNNILYNNNTNINTMNKSLHNNTTATKNLYYSPNCLEWNLEAGPSKILIGTDEGYILSL…	605	0	null	no	GO_0005515	GO_0003777	GO_0005515,GO_0003777	0	0	0	0	0	0	0	0	0	0	0	0	0	0	0	0	0	0	0	0	0	0	0	0	0	0	0	0	0	0	0	0	0	0	0	0	0
101	PF3D7_0111000	kinesin-8, putative	null	ATGGAAAGTGGTAATAAGAAAAGAATAGACACTTATGAAGAAAATGAATGGATAGAAAAAGAAGAGGGAAATAATTTGGGGGATAATAAAAATGCAGATTATTTTGTGAGTTCTAATATAGAAGATGTATTCATATCTAATAGAACTACAGAAAATGAGAATGAAGAAATGACAGGTGAATTTATGTCTTCATCAGACATTTCTAATAAAGGAGATGAAAAAAATGCGTATAAGAGAGTAAGACATAAAGAGATAAATAAGGAAGATATGCATATAGGAAATAATCATAATTATGTAATGAACGACAATAATGATGATAATAATATTCAAAATAATGTTTCTAATAATGTGGAAGAGAATATTCAAAGTATAAGTTTTATAGATCATGAAATGATCCCA…	MESGNKKRIDTYEENEWIEKEEGNNLGDNKNADYFVSSNIEDVFISNRTTENENEEMTGEFMSSSDISNKGDEKNAYKRVRHKEINKEDMHIGNNHNYVMNDNNDDNNIQNNVSNNVEENIQSISFIDHEMIPEKMNILINNNNSNIINDNIYIDGNNHNNMYIDHTPSDNIYNNNEKHTKELYDKKKPCGIYKNTNSNSNTNSNSNTNSNSNDHFKEAKDEGNNNPVDELMKDIKMFNNSMQSIYSTNNLSFQKNLSKMYSELASNKNLESLHNLFKDTSFGGNMEKAQFLKNILLASCLPQNGMGIKKNEVAINKDIENNKEVEKINNKILINDPRNVQVSQYIKKKKSSNYNLNEYTEESNITNLSESQNLISNMEPTTVFSLSSHKNNLDVKEGD…	1664	0	null	no	GO_0005524, GO_0008017, GO_0003777	GO_0003777	GO_0005524,GO_0008017,GO_0003777,GO_0003777	0	0	0	0	0	0	0	0	0	0	0	0	0	0	0	0	0	0	0	0	0	0	0	0	0	0	0	0	0	0	0	0	0	0	0	0	0
527	PF3D7_0317500	kinesin-5	EG5	ATGCTCAGAAATTCTTATAATAATGATAAATCAAGTTGCGTAAATATAAAAGTTATCGTAAGGTGTAGACCATTAAATGAAAAAGAAAAAAACGATATAAATAATGAAGAGGTAGTTCGAATTAATAATAATGAGGTTATATTAACAATTAATAGAAACAATGAAATATACGAAAAAAAATATAGTTTTGATTATGCATGTGATAAAGATGTGGATCAGAAAACTTTGTTCAATAATTATATTTACCAAATAGTAGATGAGGTTTTGCAAGGATTCAATTGTACGCTGTTCTGCTATGGACAGACCGGGACGGGTAAGACCTATACTATGGAAGGGAAAATACTAGAACACCTGAAACAATATGATAATAATAAAAAGGTGGATTTGAATGAAAGTATT…	MLRNSYNNDKSSCVNIKVIVRCRPLNEKEKNDINNEEVVRINNNEVILTINRNNEIYEKKYSFDYACDKDVDQKTLFNNYIYQIVDEVLQGFNCTLFCYGQTGTGKTYTMEGKILEHLKQYDNNKKVDLNESINSDISYCYELCENEDTGLIFRVTKRIFDILNKRKEEKIRHFKGKKNIFDEKDNEHINVINKETNGNNNNIINNNYNNLLCNKINIDKNDIYNNLKINKEPNNLLVNEKSRDITCDVVQKCSVDKNRNNDMYQTFDDKNMYDFNIKISYLEIYNEELCDLLSSTNENMKLRIYEDSNNKSKGLNVDKLEEKSINSFEEIYYIICSAIKKRRTAETAYNKKSSRSHSIFTITLIIKDINNVGESITKIGKLNLVDLAGSENALKSSYG…	1619	0	null	no	GO_0005524, GO_0008017, GO_0003777	GO_0003777	GO_0005524,GO_0008017,GO_0003777,GO_0003777	0	0	0	0	0	0	0	0	0	0	0	0	0	0	0	0	0	0	0	0	0	0	0	0	0	0	0	0	0	0	0	0	0	0	0	0	0
1736	PF3D7_0729900	dynein heavy chain, putative	null	ATGGAATTAGAAAAGACACATTTAATAAACTACTTTTTGGAAATCTGCCCTACCGTTTTAGATTGTTCTCGAAAAGAACTTCAATCAGTTTTAATTAAAAAAGAAGAAGAGAAAATAAGAAAATTTCTGTTGGATAAGAATATTAATTTAATAGTTATAGGAAAAGAAGGTAATGATAATGTAGAAAGAGAAATGGATGATAAAGAGAATGATAATGTAGATATAAATATGAATGAAGAATATAATAGTATGCGAACATCCAACTTGGATAATAAATATAATAATTTTTTATTTGTAGAATTAATGATAAATTACAAATGTGTAACTAAAAGTATTTCGATTGCTTTTATGAAAAGAAATAAAGAAAACTTTTTATCGTTAAATGATAAAATAGATAAT…	MELEKTHLINYFLEICPTVLDCSRKELQSVLIKKEEEKIRKFLLDKNINLIVIGKEGNDNVEREMDDKENDNVDINMNEEYNSMRTSNLDNKYNNFLFVELMINYKCVTKSISIAFMKRNKENFLSLNDKIDNRNKINLSNELLMFVCGQNDCNTPLDLVYLYLSQGFNNIFDAASGYGQNISGPDSSHFNYGTKKDVENMFSINNKYIGYEGENKVSNILMNNVSKKLNELLISMKNAQIDLNIPIINLHVDKRIKKLLEENPNVDDMKPDKLKQLCESQEFINQLQKDVTKWIEDIQKLTRLNGEFKSGGSALSEINFWIGYENALYQLESQLKNPEVILTLHILKNAKRYFATMSFDSDIQLKQSKEYVLNVNILMKDFPIEDLLGATSIQQIIQA…	5065	0	null	no	GO_0005524, GO_0016887, GO_0003777	GO_0003777	GO_0005524,GO_0016887,GO_0003777,GO_0003777	0	0	0	0	0	0	0	0	0	0	0	0	0	0	0	0	0	0	0	0	0	0	0	0	0	0	0	0	0	0	0	0	0	0	0	0	0
2696	PF3D7_1023100	dynein heavy chain, putative	null	ATGAGCAAAAAGAATGATGTATATGAAGAAAATGGAGAATATAATCCTAAGGTTGAAGAACTTTTAACAAGCGCCTTAGAATTTTTTAATATTCATGGGCTTGCTAGAGAGGAAGTTATAAATAATATAAAGAAAGACGAAAATACAATTAAATTATTAAACGATTTTTATGAAAAGAATGAAGAATGTTTATTTATCTTTAATGAGAAAGATTGTATAAAGATATATAATTCTATATTAGATCTCTATAAAAAACGAAAGAATGAGAAATTTTTAATTATATATAAGACCCCACAAAGTAATATTTTATATTTAGAAATGAATAATGATGCTGAAAATGTTATAAGAAATTTTTTAGAAATTTTTTTTTCTAACTTTATGAATAAAAATGAAGATATA…	MSKKNDVYEENGEYNPKVEELLTSALEFFNIHGLAREEVINNIKKDENTIKLLNDFYEKNEECLFIFNEKDCIKIYNSILDLYKKRKNEKFLIIYKTPQSNILYLEMNNDAENVIRNFLEIFFSNFMNKNEDINSSSLLKEMKKKFNNFLLNLRIIYGETEEKLTLPYAPSEIKEENVNTIEEYLIHFIKCYHIILRNFMNYKKKEYINCYEFLKCLKNKSEDINYLYNEIDKESFQEIINIILEKKKNSSYKNIIENIKKEISEHKMEILDLYTHLKPVVHFLQKLEFNKDDDIEKKYIYITPIIHSLSISIDKSNYLIKNCKFVFNFLSKVLINSCNQNLNTPEIINSIYNCVDVLKIKLYDTLNFLLNFLYIFKMYKSKNEKLQSLHEHNTYVIQR…	5687	0	null	no	GO_0005524, GO_0016887, GO_0003777	GO_0003777, GO_0003774	GO_0005524,GO_0016887,GO_0003777,GO_0003777,GO_0003774	0	0	0	0	0	0	0	0	0	0	0	0	0	0	0	0	0	0	0	0	0	0	0	0	0	0	0	0	0	0	0	0	0	0	0	0	0
1690	PF3D7_0724800	kelch domain-containing protein, putative	null	ATGGATGTCTTAAGTAAAGATGTTTCTTCAGATGATAATTTGAAGAGAATTGAATTTTTTAATAAGGAAAGTAATAATATATTGGAAGATATAAAAAAAGATAAAATATTAAAAAATGAAAAAAGTGTTTTAAAATCGCTAGCTCTGAATGATAAAAATAATATAAATAAAATAAATTATACACACAATAATACTAATACTTATAAAACTAGTAGTAATAATAATAATAATAATAATAATAATAATAATAATAGCATATACCATTTTGATAGTAATGAATTGAATAATTGTGATTTTTATAAAAATATATCCATACCAGATGAACTACACCATTATAATAAAGATGTAGACAATATATGTAATATAAATAAAGAGAAAATTAATGAAAATAATAACGAG…	MDVLSKDVSSDDNLKRIEFFNKESNNILEDIKKDKILKNEKSVLKSLALNDKNNINKINYTHNNTNTYKTSSNNNNNNNNNNNNSIYHFDSNELNNCDFYKNISIPDELHHYNKDVDNICNINKEKINENNNEVDIVYSYVINDSQKNIDSNNELISMNISIDEGENYVLKKRIKKLPFFRYGHFLCLTKNGCILAIGGTDGKKKYGLVEKYCMENKKWKQINIMHFSRSNFCGICTDNNDLFILGGEGDERILKSVEYFDSKINSWRSLPPLNCVRHSASAIFFQNMIFIIGGKDGIGEYGKVHKSVEMLNLKEKNMRWVMCKSLKQARLGLATIVFKGKIYAIGGSTGVKNLSSVEIYDFQINNWVDGPNMNLPRSNMVAFIWENHLVVYGGINKHK…	425	0	null	no	GO_0005515	GO_0003779	GO_0005515,GO_0003779	0	0	0	0	0	0	0	0	0	0	0	0	0	0	0	0	0	0	0	0	0	0	0	0	0	0	0	0	0	0	0	0	0	0	0	0	0
3264	PF3D7_1140500	myosin K, putative	MyoK	ATGTATAAACAAAAATCCTTAGAATCAAGAGATATAAATTACATATATGAGGATTCTTTCGTTTGGGTACATATTAATTCTATTAAAAAGAAAAACAGTTTATTATATCGAGAGATTTATGAATATTATAAACATCGAAATAGTTCTTTTTGTTTTTTTAAAGGGAGCGTGAAAAGATTTGTTTCTAAAAATGAAGTAGAAATATATATATTTATAGATGATAATTATAATACATCGAAAGATGACTTTAATTATAATATAATAGAAAATGTAAAATATTTATTACCTATAGATACCAATTTTGGTTGTAGTGATAACACACAATTAATATATTTGAATTCACCAAATTTGTTAGAAAATATTTATCAAAGATATAATAAAGCATATATAAATAAAGAA…	MYKQKSLESRDINYIYEDSFVWVHINSIKKKNSLLYREIYEYYKHRNSSFCFFKGSVKRFVSKNEVEIYIFIDDNYNTSKDDFNYNIIENVKYLLPIDTNFGCSDNTQLIYLNSPNLLENIYQRYNKAYINKENRNCIYTYIGYILLSVNPYENFDIYDESYMKRIKDRNDLFAIPHPFSIANDAYNCLLEDKISQSIIISGESGAGKTESSKQVLKYLTYLSYFQKGYKKKKKKMIPNECDKIEIDNMKYVDNNLKYMDDTLLYNYKRCGYTTSDNNSPQEENDTIKKAKKNYDYDKHSYSDNNDNIKNNIDKKKKKKNNSKKNISNINLKSDDYTNIINTYSSSTYEEKIQNSNPLLECFGNAKTIKNDNSSRFGKLMKLNYNEKGILCSASIETYL…	1738	0	null	no	GO_0005524, GO_0003774, GO_0005515	GO_0003779, GO_0000146, GO_0003774	GO_0005524,GO_0003774,GO_0005515,GO_0003779,GO_0000146,GO_0003774	0	0	0	0	0	0	0	0	0	0	0	0	0	0	0	0	0	0	0	0	0	0	0	0	0	0	0	0	0	0	0	0	0	0	0	0	0
5021	PF3D7_1444800	fructose-bisphosphate aldolase	FBPA	ATGGCTCATTGCACTGAATATATGAATGCCCCAAAAAAATTACCAGCAGATGTTGCCGAAGAATTAGCAACCACCGCCCAAAAGCTTGTTCAAGCTGGAAAGGGAATTTTAGCTGCTGATGAATCAACACAAACCATTAAGAAAAGATTCGACAACATCAAATTAGAGAACACAATAGAAAACAGAGCTAGCTACAGAGATTTATTATTTGGAACTAAAGGATTAGGAAAATTCATTTCAGGAGCAATTTTATTTGAAGAAACATTATTTCAAAAGAATGAAGCCGGTGTACCAATGGTTAATTTATTACACAATGAAAATATAATTCCAGGTATTAAGGTTGATAAAGGTTTGGTTAACATTCCATGCACAGATGAAGAAAAATCAACTCAAGGTTTA…	MAHCTEYMNAPKKLPADVAEELATTAQKLVQAGKGILAADESTQTIKKRFDNIKLENTIENRASYRDLLFGTKGLGKFISGAILFEETLFQKNEAGVPMVNLLHNENIIPGIKVDKGLVNIPCTDEEKSTQGLDGLAERCKEYYKAGARFAKWRTVLVIDTAKGKPTDLSIHETAWGLARYASICQQNRLVPIVEPEILADGPHSIEVCAVVTQKVLSCVFKALQENGVLLEGALLKPNMVTAGYECTAKTTTQDVGFLTVRTLRRTVPPALPGVVFLSGGQSEEEASVNLNSINALGPHPWALTFSYGRALQASVLNTWQGKKENVAKAREVLLQRAEANSLATYGKYKGGAGGENAGASLYEKKYVY	369	0	null	no	GO_0004332	GO_0003779, GO_0004332	GO_0004332,GO_0003779,GO_0004332	0	0	0	0	0	0	0	0	0	0	0	0	0	0	0	0	0	0	0	0	0	0	0	0	0	0	0	0	0	0	0	0	0	0	0	0	0
2406	PF3D7_0932200	profilin	PFN	ATGGCAGAAGAATATTCATGGGACAGTTATTTAAATGATCGCCTTTTAGCAACCAATCAAGTTTCAGGAGCTGGATTAGCTTCGGAAGAAGATGGAGTTGTCTATGCTTGTGTAGCTCAGGGTGAAGAGAGTGACCCAAATTTTGATAAATGGTCACTTTTTTATAAAGAAGATTATGATATTGAAGTTGAAGATGAAAATGGTACTAAAACTACCAAAACGATAAATGAAGGACAAACGATCCTGGTCGTTTTTAATGAAGGATATGCTCCTGATGGAGTTTGGTTAGGTGGTACTAAATATCAATTTATAAATATTGAAAGAGATTTAGAATTTGAAGGTTATAATTTTGATGTAGCTACTTGTGCTAAATTAAAAGGTGGTCTTCACTTGGTGAAA…	MAEEYSWDSYLNDRLLATNQVSGAGLASEEDGVVYACVAQGEESDPNFDKWSLFYKEDYDIEVEDENGTKTTKTINEGQTILVVFNEGYAPDGVWLGGTKYQFINIERDLEFEGYNFDVATCAKLKGGLHLVKVPGGNILVVLYDEEKEQDRGNSKIAALTFAKELAESSQ	171	0	null	no	GO_0003779	GO_0003779, GO_0005543, GO_0070064, GO_0005515	GO_0003779,GO_0003779,GO_0005543,GO_0070064,GO_0005515	0	0	0	0	0	0	0	0	0	0	0	0	0	0	0	0	0	0	0	0	0	0	0	0	0	0	0	0	0	0	0	0	0	0	0	0	0
865	PF3D7_0503400	actin-depolymerizing factor 1	ADF1	ATGATAAGTGGTATTCGAGTTAATGATAATTGTGTAACGGAATTTAATAACATGAAGATTAGGAAGACATGTGGCTGGATTATTTTTGTCATACAAAATTGTGAAATAATTATTCATTCAAAAGGTGCTTCAACAACCTTAACAGAATTAGTACAGTCCATAGATAAAAATAATGAAATTCAATGTGCATATGTTGTGTTCGATGCAGTAAGCAAAATTCACTTCTTCATGTATGCAAGAGAATCATCCAACTCAAGAGACAGAATGACCTATGCCTCTAGCAAACAAGCCATATTAAAAAAAATCGAAGGAGTTAATGTGCTCACATCTGTTATTGAAAGTGCACAAGATGTTGCTGATCTTAAATAA	MISGIRVNDNCVTEFNNMKIRKTCGWIIFVIQNCEIIIHSKGASTTLTELVQSIDKNNEIQCAYVVFDAVSKIHFFMYARESSNSRDRMTYASSKQAILKKIEGVNVLTSVIESAQDVADLK	122	0	null	no	GO_0003779	GO_0003785	GO_0003779,GO_0003785	0	0	0	0	0	0	0	0	0	0	0	0	0	0	0	0	0	0	0	0	0	0	0	0	0	0	0	0	0	0	0	0	0	0	0	0	0
44	PF3D7_0105300	cyclase-associated protein	CAP	ATGACAAGTGAAGGAAGTATACAACTTAAAGATGATCAGTGGGATGTTATAAATTACAAAGATGGGAAGATCGTTAAATTATCACAAGTAGAATTAAATAATGCTGTGAATATATATAATTGTGAGAATACAACTTTTGTAATAGAAAATAATAAATTTAAATCTTTACAAATAGAGAAATGTGTAAAATGTAATGTTGTATTAAATAATTTAATATCTTCTATTGAAATAATAAATTCTAAAAAAGTTAAAATACAAGTACTCGGAAAAAGCTCATCTATATCTATAGATAAATGTACAGGTGTAGAATTTTATTTATCTAAAGAAAATGTAGAATGTGAATTTACAACTGCTTTATCATCTGAAATGAATATTCATATTCAAGGACAGGATGAAGAA…	MTSEGSIQLKDDQWDVINYKDGKIVKLSQVELNNAVNIYNCENTTFVIENNKFKSLQIEKCVKCNVVLNNLISSIEIINSKKVKIQVLGKSSSISIDKCTGVEFYLSKENVECEFTTALSSEMNIHIQGQDEEWTEITIPEQFQHHLENGKLTTRVSDLYKF	162	0	null	no	GO_0003779	GO_0003785, GO_0008179, GO_0046983	GO_0003779,GO_0003785,GO_0008179,GO_0046983	0	0	0	0	0	0	0	0	0	0	0	0	0	0	0	0	0	0	0	0	0	0	0	0	0	0	0	0	0	0	0	0	0	0	0	0	0
1027	PF3D7_0520100	protein phosphatase PPM9, putative	PPM9	ATGAGTTTATTAACCAATTATAGAGGTAAGAATAATAATGAAACCATGATAACAGAAAGGAGTGTTAATAATGTGAATGAATCTGATAAAGTTAATAATATAAAAGAAATGAATAATGTGAATGATATGAATAATATTAATAATGCAGAGAAGATAATTGAATATAATAGTATAAATGATTTAAAATATTGTAAAAGTATTATAGACATTGTAAATTATATTATAACTATTGGTATATGGGAAATGTATACATACGAATGGGTATTTAATAGAAAGACGTTTTTATATTATCATACATTATTAGAGAAATATTATTTTTATGACAAAAATAATAATTTGACTTTATTTAATGAGAAGTCTTTTTTTTTATATGTATGCACATTTGAAAATAATGAATTT…	MSLLTNYRGKNNNETMITERSVNNVNESDKVNNIKEMNNVNDMNNINNAEKIIEYNSINDLKYCKSIIDIVNYIITIGIWEMYTYEWVFNRKTFLYYHTLLEKYYFYDKNNNLTLFNEKSFFLYVCTFENNEFVSDFFFQRNKKKKELKLTSYTKTMQGRRKKQEDRYLVITDLTKYIDSNDYKTLYFYKKNPLYFYSIFDGHRGIKACEYCMSHIIKNIIYYFYNQNMEDDQSSTTINKLNSNDINISPDKRRKFDNVKNEDIPLGDSTININNINDMCNINNNINKCNENFNDLHIEGDNTNDNNYCMNNKTEEERKENLFINTTSKNDYFLKNISSVNHISNDNILNNIHTNKKDIENNTPIKNKDKRLIDSSYLNTISDDVEYRKKRKVEEMHII…	706	0	null	no	GO_0003824	GO_0003824	GO_0003824,GO_0003824	0	0	0	0	0	0	0	0	0	0	0	0	0	0	0	0	0	0	0	0	0	0	0	0	0	0	0	0	0	0	0	0	0	0	0	0	0
1354	PF3D7_0621200	pyridoxine biosynthesis protein PDX1	PDX1	ATGGAAAATCATAAAGATGATGCAGTTTTATTAAAACACGGATGGTGCGAAATGCTTAAAGGAGGAGTTATTATGGATGTAAAAAGTGTAGAACAAGCAAAGATAGCTGAAGAAGCTGGAGCTATTGGTGTAATGGTTTTAGAAAACATTCCTTCTGAGCTTAGGAATAAGGAAGGTGTTGCAAGAAGTGTAGATCCATCAAAAGTAGAAGAGATAAAGAAATGCGTTTCTATTAATGTTCTTGCTAAAGTTCGTATTGGTCATTTTGTTGAAGCACAAATTTTAGAAGAGCTTAAAATTGATATGATAGATGAAAGCGAAGTATTAACAATTGCTGATGAAATGCATCATATTGATAAGCATAAATTTAAAACTCCTTTTGTATGTGGGTGTACAAAT…	MENHKDDAVLLKHGWCEMLKGGVIMDVKSVEQAKIAEEAGAIGVMVLENIPSELRNKEGVARSVDPSKVEEIKKCVSINVLAKVRIGHFVEAQILEELKIDMIDESEVLTIADEMHHIDKHKFKTPFVCGCTNLGEALRRISEGASMIRTKGEAGTGNIIEAIKHIRTVNNEIKYLCSLSDSEVYHFAKKINAPIDLVLLTKKLKRLPVVNFAAGGVATPADAAMCMQLGMDGVFVGSGIFESENPRKMAASIVSAVSNFNNPKILLDVSMNLGKAMCGSTRVSDKWKNKNEEHTKFLTPQ	301	0	null	no	GO_0003824	GO_0003824, GO_0004359	GO_0003824,GO_0003824,GO_0004359	0	0	0	0	0	0	0	0	0	0	0	0	0	0	0	0	0	0	0	0	0	0	0	0	0	0	0	0	0	0	0	0	0	0	0	0	0
3609	PF3D7_1226100	haloacid dehalogenase-like hydrolase, putative	HAD3	ATGTTAAAACACAAATATAACGATTCATGTGTACAGGAGTTATTTTATAAAAATAATATAAAGTTAATAGCTATAGATATAGATGGAACTTTGGCCGATGATACAGGGAAAATAAGTGATGAGAATTTAAAAGCTATTGAGGTTTGTAAAAAAGGTGGGATAGAAATTATTTTAGCTAGTGGAAGATTACATTCTTATGCAATGAAAATGTTTACAAATGAACAAATTGAAAAATATAAAATAGAAAAATTAGATGGTGTATATTCCCATGGTGCTTATATTCATATGAAAGGTTATGATTATGTTTACAGGAAATTTTCTTATAAAGATTTAGAATTAATTTTATTTTCTTTAGGTTCATATAATATATTAAGAAATGCTGTATTTTTAACAGTTGAT…	MLKHKYNDSCVQELFYKNNIKLIAIDIDGTLADDTGKISDENLKAIEVCKKGGIEIILASGRLHSYAMKMFTNEQIEKYKIEKLDGVYSHGAYIHMKGYDYVYRKFSYKDLELILFSLGSYNILRNAVFLTVDSAYVINDDIKLIEEYIYTPESEGIISDIEYVKIIDTNYKPILINKIKDIFNIGDIVSIEIYDKLYPNQDIYSDLFKVLFYELQPHYKIYIPSSNNKIVLSPINTAKVHTTQLYAQFYRINLNNILSIGNDDNDIELLSSTGFSVAVKNSTPRALQVARCVSTKTNNENAVANIIYRVLSGRRS	316	0	null	no	GO_0003824	GO_0003824, GO_0016787	GO_0003824,GO_0003824,GO_0016787	0	0	0	0	0	0	0	0	0	0	0	0	0	0	0	0	0	0	0	0	0	0	0	0	0	0	0	0	0	0	0	0	0	0	0	0	0
3669	PF3D7_1232200	dihydrolipoyl dehydrogenase, mitochondrial	LPD1	ATGAACAGCGTTATTTTTAGAGCACATTGTTTTTTTCAGCCATTGCGTAGATGCTTCTCAACTAAGAAAGACTATGATGTTATAGTCATTGGAGGAGGGCCAGGTGGTTACGTGTGCAGTATTCGATGTGCTCAAAATAAACTAAACGTTTTGAACGTGAACGAAGACAAGAAACTAGGAGGCACATGTTTAAATAGAGGATGCATTCCATCCAAATCTCTATTACACATTTCTCATAATTATTATGAAGCAAAGACTAGATTCAAAGAATGTGGTATATTAGTTGATAATGTTAAGTTGGATATAGAGACTATGCATAAACATAAAAATAAGTGCATGGGTAATTTATCTGATGGAATTAATTTTTTATACAAAAAGAACAATGTGAATCATATTATA…	MNSVIFRAHCFFQPLRRCFSTKKDYDVIVIGGGPGGYVCSIRCAQNKLNVLNVNEDKKLGGTCLNRGCIPSKSLLHISHNYYEAKTRFKECGILVDNVKLDIETMHKHKNKCMGNLSDGINFLYKKNNVNHIIGHGSLVDEHTVLIKTEKEEKKVTAERIVIATGSKPIEIPLKKLNDNNFNDADNVNDILEYDHEIIQNSDDILNFKKVPHNISIIGGGVIGLEIGSVFSKLGSDVTVFEYNERLCGFLDADVSKVLQKTLEKIKMKFVFNTSVIGGNIENNQAALFAKNKKTNEIKKTTSEIVLICIGRKANFDNLNLHLLNIELNKNKKIPVDEYFNVIAQPTIKAIGDAIDGPMLAHKAEEEGYLLANILFDELKNNKKKKAHINYDLVPSVIYT…	512	0	null	no	GO_0004148, GO_0050660, GO_0016491	GO_0003824, GO_0048037, GO_0004148, GO_0042803	GO_0004148,GO_0050660,GO_0016491,GO_0003824,GO_0048037,GO_0004148,GO_0042803	0	0	0	0	0	0	0	0	0	0	0	0	0	0	0	0	0	0	0	0	0	0	0	0	0	0	0	0	0	0	0	0	0	0	0	0	0
4010	PF3D7_1312600	2-oxoisovalerate dehydrogenase subunit alpha, mitochondrial, putative	BCKDHA	ATGAGAAATATTGTTCAGAAATACTTACAAAGGAATAGCACAAAGTTATTTAACAGAACAAGTGTATTCAATTTATATAAAAAATGTAATTTTTCTGGATACAAAATTTACAGTGACGGACTAGTTCACTCTGAATTTTCTACTGAGTTAAAAACTGTAAATGAAGTTATAAAAATGCCTATTTATAGAATATTGGATACGAATGGACATTTATTAGACGGTCATGAAGCGCCATTTAAGGATGAAGAAGTATTAAAAATTTACAAGGATATGGTTGAATTTTCTATATGGGATGAAATATTTTATGGAATACAAAGACAAGGTAGAATATCATTTTATATAGTTAATGAAGGAGAAGAAGGTTTACAATTTGGTATGGGTAAAGCATTAAGTGTTGAT…	MRNIVQKYLQRNSTKLFNRTSVFNLYKKCNFSGYKIYSDGLVHSEFSTELKTVNEVIKMPIYRILDTNGHLLDGHEAPFKDEEVLKIYKDMVEFSIWDEIFYGIQRQGRISFYIVNEGEEGLQFGMGKALSVDDHLYCQYRETGVLLSRGFTYTDILNQLFGTKYDEGKGRQMCICYTKKDLNIHTITTPLGSQLSHAAGCGYALKLKNQKAVAVTYCGDGSSSEGDFYAALNFASVRQSQTMFVCKNNLYAISTSIKDQYRGDGIAPRALALGIESIRVDGNDLFASYLATKKLRDICIQESKPVFIEFMSYRYGHHSTSDDSSLYRPKEENEAWRQEGVHPISRIFLYLKNKNLYSEKEDQEHRKSVKENVLKELKKYESVKRYNIVGGLFEDVYHE…	429	0	null	no	GO_0016624	GO_0003826	GO_0016624,GO_0003826	0	0	0	0	0	0	0	0	0	0	0	0	0	0	0	0	0	0	0	0	0	0	0	0	0	0	0	0	0	0	0	0	0	0	0	0	0
3746	PF3D7_1240000	3-hydroxyisobutyryl-coenzyme A hydrolase, putative	null	ATGTTAAAGTTTAATTGCATACCTTATAAAAATATAGGAACCTTTCATGATGCCCTTAAGCAGCATAATATAAAATTTGAAAAAAGAAACAATTTTATTTTTTTTCATGCTTTTTCATCTTTACGTAAATATAAATCACAACATTCTGAAAAGAATAATATTTTGAATAAATTATTTTTTTTTAAAAAAGAATACAAAAGTTACTTCCACAAACTTTCCAATAATTTGTTCTTGTCTAGTAAGAGAAAAAATGAAGTAATATTTCATAAAATGGATAAGACGAATAAAAATGTTCAAATGATTAAACATAATATTATAACTAGCCAAAGAAGAGAAAATGGGATGGAACAATATACTGCTATAGATGGTAAAACCAAAGTAAACAACAACAATAATAAT…	MLKFNCIPYKNIGTFHDALKQHNIKFEKRNNFIFFHAFSSLRKYKSQHSEKNNILNKLFFFKKEYKSYFHKLSNNLFLSSKRKNEVIFHKMDKTNKNVQMIKHNIITSQRRENGMEQYTAIDGKTKVNNNNNNDNSNNNNDNSNNNKNNNNDMKANIHHDMDKVKNNMIDLELSELWTKKSLIVNFQNNICEIILNRPEKLNAINKDMINALLNIIKSLDNDERCFMVIIRSTNSNCFSSGSDVKYVVENKEQGIQHLKQLYLYINYISQMKKNLLCIWNGYVMGGGLGISIYSKYKVINKNAIFAMPENKIGFFPDIGCCYFFRKYFGRNIGLHLGLTSLRLNEVDLINFNVCNNYIENVDTFMDNLNNIKATNQEDFNKKLNNLLTNKYVSKMSYNK…	541	0	null	no	GO_0003824	GO_0003860	GO_0003824,GO_0003860	0	0	0	0	0	0	0	0	0	0	0	0	0	0	0	0	0	0	0	0	0	0	0	0	0	0	0	0	0	0	0	0	0	0	0	0	0
876	PF3D7_0504600	2-oxoisovalerate dehydrogenase subunit beta, mitochondrial, putative	BCKDHB	ATGATGAGACTATTAAGAAATAACGTAAAAAATATGTTCTTAAAAAATTGCTTTCTTGTGAGGAATACAAATGTAAAATGTTGGAGAACCGATAGGTTTCATAATTACAATATGTGGAATACTGTTGAAAATAATGGCATTCGTGGTTTTTCTTCCTCTAGTTTTGAAGAGATAAAAAAAATGAATATGTTTACAGCAATAAATTCAGCTATGCATAATGTATTTGAAAGTAACCCTAATTCTGTATTATTAGGAGAAGATGTTGCTTTCGGAGGTGTGTTTAGATGTTCTTTAGATTTATTAAAAAAATATGGAAACATGAGAGTTTTCAATACTCCCTTATGTGAACAAGGAATTATAGGATTTGCTATAGGTCTAGCTGAAAATGGATTTACAACA…	MMRLLRNNVKNMFLKNCFLVRNTNVKCWRTDRFHNYNMWNTVENNGIRGFSSSSFEEIKKMNMFTAINSAMHNVFESNPNSVLLGEDVAFGGVFRCSLDLLKKYGNMRVFNTPLCEQGIIGFAIGLAENGFTTIAEIQFGDYIFPAFDQIVNDVAKYRYRSGSSFDVGKLTIRSTWGAVGHGGLYHSQSPEAFFAHAAGIKIIVPSDAYKAKGLLLSAINDPNPCLFFEPKILYRSSVCDVPTGPYQLELGKADVVRQGSDVTIVTWGSLVHKMKNAAEILSKKHNIECEVIDLQSIIPWDIETVQKSVEKTGRLLITHEAQLTNGFGAEIAAKIQERCFYNLHTPIKRVCGYDTPFPHVYEPFYMPDAHKVIYEVKKMMK	381	0	null	no	GO_0003824	GO_0003863	GO_0003824,GO_0003863	0	0	0	0	0	0	0	0	0	0	0	0	0	0	0	0	0	0	0	0	0	0	0	0	0	0	0	0	0	0	0	0	0	0	0	0	0
3800	PF3D7_1246100	delta-aminolevulinic acid synthetase	ALAS	ATGAGGAAAAAAAGAACTTTGAAAGTGAGTATTAACGAAATCAAGAAATATTGCCCCTTTGTGAAAAATATTCAATTTTTATATAATACTAATGAGAAAAAAAATAATCTCGTATTATCCGTTATGTCAGATTTATGTCCAGTAGGTAAAGCAATAAATGAAAAACATTTTATAATAATAGATAATAAATCAAAAATTAATATTATAAAAATATTGAAACAAGCTAATATGCAATCAAAAGTTTTAGTACAATGTATTAAAAATAAAAATATAGAAAAAGAGAACATGTCTAATGATGATTTATTAAAAAGTGGTAAAAGAAATAATAATGTGTTATTTTATGATATATTAGAAAAAAATAAAAATGATCATAGTTTTCAAATAAATGATAATACCATA…	MRKKRTLKVSINEIKKYCPFVKNIQFLYNTNEKKNNLVLSVMSDLCPVGKAINEKHFIIIDNKSKINIIKILKQANMQSKVLVQCIKNKNIEKENMSNDDLLKSGKRNNNVLFYDILEKNKNDHSFQINDNTIQKNNIIYKYINSLDEYKLFKNNCNNNLKDLLNKLYTDKRYRIFTILNKYRINYPNVYIENNKLMLPSFYEFYQKYGYKPCIGNIRYQLSASFEDNNKNICSFSHKNKENYLFNFWNLHIDNVSNEKTVVWCSNDYLCLSNNEKIIEVGIETLKKIGNSSGGTRNISGSLLNHTHLEYIIAKWYNKESSLLFTSGYIANVGALETLGKLLNLIYISDEMNHASIINGIRESRCEKFIFKHNDMNDLERILYNLRINKQYENRKIMIV…	630	0	null	no	GO_0003870, GO_0030170	GO_0003870	GO_0003870,GO_0030170,GO_0003870	0	0	0	0	0	0	0	0	0	0	0	0	0	0	0	0	0	0	0	0	0	0	0	0	0	0	0	0	0	0	0	0	0	0	0	0	0
4178	PF3D7_1329400	AMP deaminase, putative	null	ATGCGGTTACCTAATAAAAATGATGGTCATAAAACTGTTCCTCAAAAAGAAAAAGGATGGAATAATTTATATGAAACAGTTGTAAATATTTCATCTAAGTCTTCTATAAAATATGATGAATATACTTTGTTAAATAAAGATCTTAACAAATTACAGACATGTAATCGTTTTAGTTTTACTTTAACGTCCACGGGGGCAGTAACAAAAGAACAGCTCGAAGTCTCCAGGAAATTGATAAGATTGTGTAATTTGAGAGATACGTATATAAAAAAGTTTCAAGATATCGACACTTGCCTTGTAGAAAGTAAATCATTAAATAAAAATTACAAGAGCAAAAATATAGATGATTATGAATCTTCAGAACCTATATATAATCCTTATAATGTCAAAATATTAAAG…	MRLPNKNDGHKTVPQKEKGWNNLYETVVNISSKSSIKYDEYTLLNKDLNKLQTCNRFSFTLTSTGAVTKEQLEVSRKLIRLCNLRDTYIKKFQDIDTCLVESKSLNKNYKSKNIDDYESSEPIYNPYNVKILKNCNAFINFVDGIFFVHWDPHTDEGPSSRDMCVESNKLANHRNIKSAEDYLSSIQEIMNVVQDPACKSFCFQRLKYLEKKFDFHIMFNGPLELSETRDIKHRDFYNIRKVDVHVHHSACMQQKELLRFIREKYRTEPNTVVYINEKREMLTLKSIFDEELKSTAYESTIDTLGVNALGNCFHRFDLFNEKYNPFGQKLLRDIFLKTDNYIEGRYLAEITKKQIKNLERSKYQHVEWRISIYGKNKNEWLKISKWVLNNQLSSIRVRW…	693	0	null	no	GO_0019239	GO_0003876	GO_0019239,GO_0003876	0	0	0	0	0	0	0	0	0	0	0	0	0	0	0	0	0	0	0	0	0	0	0	0	0	0	0	0	0	0	0	0	0	0	0	0	0
4040	PF3D7_1315600	CDP-diacylglycerol--inositol 3-phosphatidyltransferase	PIS	ATGAAGATGAAAAAAAAAAATGTTTATCTGTATATACCCAATATAATAGGTTATATAAGAGTAATTTTGGCCTTGTTAGGATTTATTATATCCAGAAAAAATCTATTTCTTTTCGTGTGTTTTTATAGTGTTAGTCAAGTTTTAGACGCTTTAGATGGATGGACAGCTAGAAAATTCAATCAAACTTCTGTGTTTGGTCAAATATTAGATCAAATTACTGACAGATTATCCACAAGTTTGTTATATCTTCTTAATAGCAGTGTATACGAAGAATATATTACATTAATTGGATTAATTATGATTGCTGATATAGCAGGACACTATTTCCACTCAACATCGTGCGCAATAGCAGGCAATAAAACTCATAAAAAAATAGAAAAGGGGAATAAGTTGCTTAAA…	MKMKKKNVYLYIPNIIGYIRVILALLGFIISRKNLFLFVCFYSVSQVLDALDGWTARKFNQTSVFGQILDQITDRLSTSLLYLLNSSVYEEYITLIGLIMIADIAGHYFHSTSCAIAGNKTHKKIEKGNKLLKLYYEKPWVMVICIIAYESFLICAYLLRVAVKKSLIYKLSYYALICSFPLAAFKMFTNVSQGVHGVKCLVDMDCKKK	209	3	HMM: MKMKKKNVYLYIPNIIGYIRVILALLGFIISRKNLFLFVCFYSVSQVLDAL, NN: MKMKKKNVYLYIPNIIGYIRVILALLGFIISR	yes	GO_0016780	GO_0003881	GO_0016780,GO_0003881	0	0	0	0	0	0	0	0	0	0	0	0	0	0	0	0	0	0	0	0	0	0	0	0	0	0	0	0	0	0	0	0	0	0	0	0	0
4688	PF3D7_1410200	cytidine triphosphate synthetase	null	ATGGATAGTGTAGATGATGAAAAACCTATAATAAAATACATCATTGTGACCGGAGGTAATATGAGTGGACTTGGTAAAGGAACAGCTATGAGTAGTATGGCTGTATTATTGTTAACAAAAAACATTTTATTAACAACAATAAAGATTGATCCATATTTAAACATTGATGCAGGAACGATGTCTCCATATGAACATGGAGAAGTTTATGTATTAGAAGATGGGGGTGAAGTTGATTTAGATTTAGGAAATTATGAGCGATTTTTAAATATAAGATTAACTTACAAGAATAATATTACATCAGGAAAAATATATGAAGAAGTTATAAAAAAAGAACGAAAAGGTGAATACTTAGGTAAAACGGTACAAGTAGTACCACATGTAACGGATGCTATCCAAAAA…	MDSVDDEKPIIKYIIVTGGNMSGLGKGTAMSSMAVLLLTKNILLTTIKIDPYLNIDAGTMSPYEHGEVYVLEDGGEVDLDLGNYERFLNIRLTYKNNITSGKIYEEVIKKERKGEYLGKTVQVVPHVTDAIQKWIKDVIDENIKKMKKEYNIDSFNKIPCMCLIEVGGTVGDIESAVYLEALQQLINNLNNDDVCLCHLSYVPIIGNLREQKTKPTQHSVKILREAGLKPDFIFCRCEEPLTQEAIKKIALFSQVKNEHVISLHDTSNVYKVPLILDKQNVCMNVLKKLNLENVVLNNKLQISPYSFNIWKQLADRYESSSEQVVIGIVGKYTASNDTYLSIISSLVHACLECGFKLVIKYINSSHLSLKQKKQKKNMDWKKKARKYSYENFHENSSTE…	858	0	null	no	GO_0003883	GO_0003883	GO_0003883,GO_0003883	0	0	0	0	0	0	0	0	0	0	0	0	0	0	0	0	0	0	0	0	0	0	0	0	0	0	0	0	0	0	0	0	0	0	0	0	0
1709	PF3D7_0727300	DNA (cytosine-5)-methyltransferase	DNMT	ATGCACAAAATAAAGGTACTGGAATTGTATTGCGGAATAGGAGGATTACACTATAGTTTACTTCAAGCTTTTAACAATTTTGTTCATGCAAATAAGATAACAGAAAAAAAATGTGATACATATAAGGATGGTATACATAATCATATGAGCAATAATAAAAGTATCGAGATCCATAAATATCATGATTGTACTTTAACATGTTTAAATGATTTATTTTGTTTTATTTCAGTAGATTTAAACCCTGTAGCTAACCAAACTTATTTTCATAATTTTAAAGATTCGACAATTTTGTTAACACAAACGAGAGATGTCCATAAATTTTTTAAATGGAAATGTGATAGTATGGATAAACAAAGCAATGGATCGACACATAATGAACATGAAAAAACACAAAAAAAA…	MHKIKVLELYCGIGGLHYSLLQAFNNFVHANKITEKKCDTYKDGIHNHMSNNKSIEIHKYHDCTLTCLNDLFCFISVDLNPVANQTYFHNFKDSTILLTQTRDVHKFFKWKCDSMDKQSNGSTHNEHEKTQKKKNKKKNNDDDEKNNIFNINKNYIIQTDINNIMPEFLNNHHFNILLISNPCQPYTRQNQKFKEINLDLLFCKNNEYKQNVNNNISNDNNSFYSNHNGDENHQFNVDNINIDELNNYIYNDKDERTKSFIHICTLLTKVDFKNLPEYIFIENVKNFELSSSFIYFLYCIKNNYSFQTYLLSPLQFGIPNERLRFYCICKKKNYDFKHANNLSGINYIKDKNLNLYTNSLIPKNYLHKNNIHEQKNNQGDNYNNISCENVIFYTPNLIT…	706	0	null	no	GO_0008168	GO_0003886, GO_0003677	GO_0008168,GO_0003886,GO_0003677	0	0	0	0	0	0	0	0	0	0	0	0	0	0	0	0	0	0	0	0	0	0	0	0	0	0	0	0	0	0	0	0	0	0	0	0	0
432	PF3D7_0308000	DNA polymerase delta small subunit, putative	null	ATGGACGAAAAAGTAACAAACCAAGAAGTCGAAGAAATAATAAAACATATTAATGAGAATAAGAAGAATGAAGGAGAACATCAGAATAAAAAAATAAAGAAGAAACATTTCGAATATGTAAATTTATCGGAAAGGTTTATAATTACATGCCCTACATATACACAACAATTTAGTCATATTTATAGTTTACGAATAAAAATTATGAAAACACTTTTGATGAGAACGATAGAAGATATTGTGAAGAAGGAAGAAGGAAATGAAAAAAAAAAAAAAAATATAAATAATGACAATATAAATAATAATGACAATATAAATAATGACAATATAAATAATAATGACAATATAAATAATGACAATATAAATAATGACAATATAAATAATAATGACAATATAAATAAT…	MDEKVTNQEVEEIIKHINENKKNEGEHQNKKIKKKHFEYVNLSERFIITCPTYTQQFSHIYSLRIKIMKTLLMRTIEDIVKKEEGNEKKKKNINNDNINNNDNINNDNINNNDNINNDNINNDNINNNDNINNYNNYHILQYLKEIKVNEKCYCIGTIFKKMELRPSILNEYLSEISILNNTINYTHDEDILFLEDETARLKLEGNINSDFYITGLTVIVKGIGMSNGSLYVEEIIYSYIPKLDIPNCISNDDKFILFVSGLYINELNKSINNISLLRNFILRLHGDTYLSENLIRLIILGNSLSNIDNDEKDMNTIDVFLSSLCSSIHIDLMPGDKDPSDSNLPQQPFPNIFFKKARNFNSFQCVTNPYLFSIDNINICCMSGEPVHNITSYSKNNKM…	498	0	null	no	GO_0003677, GO_0003887	GO_0003887	GO_0003677,GO_0003887,GO_0003887	0	0	0	0	0	0	0	0	0	0	0	0	0	0	0	0	0	0	0	0	0	0	0	0	0	0	0	0	0	0	0	0	0	0	0	0	0
5206	PF3D7_1463300	DNA polymerase alpha subunit B, putative	null	ATGAAGGACATAAAACAGGCAGACGTAAAACATTATCTAGAAACTTATTACACAGATAACAGTATAGGTGATGATTTGAAAGAGGCCTTTGATTATATCGAAAGAAATAAACATAAGAACAATTTCCATAAATTATTTGAAGATTATTTAGAAGATTATAATAAGAAGTTATTAAAAAATGGAACCTTGTTAAGAGATCATGTCGTTTATGAATATGAAAGAGTAAAACAGTATAACAGTGAATTAATTGAAACGGAAGGAAGGAGTTGTAATAATAAATATCATTATTATATTAATTATGTGAATAGTATAAATGAGAATTATAAATTTTTAGGTCTTGACACAAATGTAATATGTGATTGTATAAATAAGAAGATATCCTTATTTTTAGAATTATTT…	MKDIKQADVKHYLETYYTDNSIGDDLKEAFDYIERNKHKNNFHKLFEDYLEDYNKKLLKNGTLLRDHVVYEYERVKQYNSELIETEGRSCNNKYHYYINYVNSINENYKFLGLDTNVICDCINKKISLFLELFLKYSKKLNLNIEIEPILNMSDDESYIFGRIYTENEMNISESNIILEGNMKWNNGDKAQLLNLTDMRNICFFLGQILAIKGKKEINQFSIKYYVSNVYAGLPSHLKVQIDKEFVLKHFNTKEIEEDSKIHENILHLYNNENIHIMICNGYIYNDNNYSENLDNFLKVVNEKLPHVVLIFGPFLYIRNFSETIQKIGDINIIYENLFKKITKFAKNEILEKTHFFIIPSIYDSINIYPLPQPPFYYENSNINSPNVHFLSNPSYIYIN…	539	0	null	no	GO_0003677, GO_0003887	GO_0003887	GO_0003677,GO_0003887,GO_0003887	0	0	0	0	0	0	0	0	0	0	0	0	0	0	0	0	0	0	0	0	0	0	0	0	0	0	0	0	0	0	0	0	0	0	0	0	0
706	PF3D7_0411900	DNA polymerase alpha catalytic subunit A	null	ATGAGTAGTGTTTTTGATAAACTCAAGAAACAGAGATCAAAGGAATGTAAGGCAACCGATTTTTATGAGGTTAAAAATAAAAATGATGAAATATACGAAGTAGTGGATGAGGAAGGGTATATGAAAAATAAAAGGTCCTTACAAAATTTTATAGTTGGAGGTGATAAAGATTTTGATTCAAGTGATGATGTGATTGTGGAAAATATAAATTTTACTTTATTGAAAAAAAAAAATGTTGATAAAGAACCCAAAGTCAAGAGAAATCAAACCCTAGATGATTTCATACGAGAAAAGAAACTTCGAAAAACGTTGTCAGGAAATAAATTAAGCAAAGAAGAAATTCACAAAACAAAAAATATCGAAGAACTTATGGACCAAAATACCTCAAGTGATAGTGAT…	MSSVFDKLKKQRSKECKATDFYEVKNKNDEIYEVVDEEGYMKNKRSLQNFIVGGDKDFDSSDDVIVENINFTLLKKKNVDKEPKVKRNQTLDDFIREKKLRKTLSGNKLSKEEIHKTKNIEELMDQNTSSDSDGESRTRKRKTRESYENSMYKNMNKSSCYIRSKDYEYNIYDMKHTNEYNKKIIENNNNNNNNYYYYNNYNDMSFSNKDLEYSKYTKVKNEKEDIDKHQPYDIHRDMGSSLKKKENYVKQEEQSNMINVGNDDDINEKKNKIHLMKNELVLKKEIQIKENEENIKEVKEQGSKNNNNKNNNDNNNNNNNVDDFYNDYILNEMNISPLFIKIENETLKKEEKKLKENDINDKEEDILENDIDSEMLKNKYEQLIKYEENNNLFVNVYVF…	1912	0	null	no	GO_0003677, GO_0003887, GO_0003676, GO_0000166	GO_0003887	GO_0003677,GO_0003887,GO_0003676,GO_0000166,GO_0003887	0	0	0	0	0	0	0	0	0	0	0	0	0	0	0	0	0	0	0	0	0	0	0	0	0	0	0	0	0	0	0	0	0	0	0	0	0
2835	PF3D7_1037000	DNA polymerase zeta catalytic subunit, putative	null	ATGAATTTAGCTGAAAAACCAAAAGCTTTTTTTATTTGCAAATTTTTATTTTTTTATTATATTTATAAAAAACCCATCTTACCTTTTGATTCTTTGAAATGTAAAATTAGTGGTAAAGAGATACCCTATGTTTGTATTATTCAAATATTAGGTCTAAGTCTTTTAGGCCAACGTGTGTGCTTGTATATACACGACTTTTATCCTTTCTTTTATTTATTAATACCACCTGAGGAAAAGCAAAATGATAAGCTAGAAATAGAATTGTGCTCATTTTTGGAGGAAGAATATGGAAAAGCACGAAAAGATCCAAGTAATAATGTGTGTGTTTATAATATAGAAAGAGTTAAAAGGAAAGGGATTTATGGGTATAATGAAGAGTGCGATGATTTTTTGAAAATA…	MNLAEKPKAFFICKFLFFYYIYKKPILPFDSLKCKISGKEIPYVCIIQILGLSLLGQRVCLYIHDFYPFFYLLIPPEEKQNDKLEIELCSFLEEEYGKARKDPSNNVCVYNIERVKRKGIYGYNEECDDFLKISFLYPNTINYFASLLKKKLFKKRIWDLYEVHINYMLHFLCMKNIYGCSEIYIDKNIYFRKEFVNEINFECIEKEERWYLGEKKYNLDNFKRNKYLEVDAPLVFTIKTINVNFSSLKRETTYDIECDIKHQHILNEKIYTYEFEKNKIKWKKEFNFDLPINHLDSFAKMWMKEKKRCKYMDMDLKRELFYFKSYENDLCFDTFDVLTERTKKMFQGFLEFMKRMQSEKDKVNYEQILEYDNIENVKKYNKVINDDMKLKEDHNFNSD…	2226	0	null	no	GO_0003677, GO_0003887, GO_0003676, GO_0000166, GO_0005515	GO_0003887	GO_0003677,GO_0003887,GO_0003676,GO_0000166,GO_0005515,GO_0003887	0	0	0	0	0	0	0	0	0	0	0	0	0	0	0	0	0	0	0	0	0	0	0	0	0	0	0	0	0	0	0	0	0	0	0	0	0
1446	PF3D7_0630300	DNA polymerase epsilon catalytic subunit A, putative	null	ATGTCTACACAAACAAGGACAAAAGGATGGGAGAAGGAATCAAAAATTAATCCAGATTATGAATATGAGAGATTGTTAAAATTAGAAAATAAGTTTCATATAAAAGCATGGATTAATAAAGGAGAGAAAGAAGGATATCTTTATAATATAGTTCCTACTACTATGAATGTAGTAGCAAAAAATTCAAATAAATCACATAAAAAAACAGGTGTACACATGTATTTTGTGTCAGACAATAACAAGACGTGGAGATTAACTCTTTTTTATAGACCCTACTTTTATTTAAAAACCAAGAATATACATAATTATGAACAAGTAACAAAATTTTTAAAAAAGGAACTAGATAAGTATAACGTTGAAATTGATTATGTAAAAAAAGAGGATTTAAGTTTATACGAT…	MSTQTRTKGWEKESKINPDYEYERLLKLENKFHIKAWINKGEKEGYLYNIVPTTMNVVAKNSNKSHKKTGVHMYFVSDNNKTWRLTLFYRPYFYLKTKNIHNYEQVTKFLKKELDKYNVEIDYVKKEDLSLYDHLNKKRSYLSNIFFKLSYDTIENLMNARDFLVKIIERNKKQNKNYNNSNNDKHIFNNEDLSYSQLEFSYKNEYSYNKYDDQKENTQKQQFTTNITEEDDKKRILNAKSNDNNNNNNNNTHNSNNNNNILNMNDIIVTTKKQILSKEEIMNEIIEIYEYDVKYLTRICIDKNIRCGLWYKVKREEDELYTELIQFEILNKKVLAPLNILAWDIECYKDELKFPDKEKDEIILISYMYNAQGYLIVNRNVMSKNIREFLYKPNEEYSG…	2907	0	null	no	GO_0008408, GO_0003887, GO_0003676, GO_0000166, GO_0008270	GO_0003887	GO_0008408,GO_0003887,GO_0003676,GO_0000166,GO_0008270,GO_0003887	0	0	0	0	0	0	0	0	0	0	0	0	0	0	0	0	0	0	0	0	0	0	0	0	0	0	0	0	0	0	0	0	0	0	0	0	0
2633	PF3D7_1017000	DNA polymerase delta catalytic subunit	null	ATGGAAGAACTGAAAACTTGCCCATTCACAAATGTGATTCCGTACGGGTTGCTATATGATAAATTAAAAAAAGAAAAAAATAATGACGTTCCTGAAAATTATGTAATAGAAGAATTTGATAAGCTCTTGAAAAATTATGAGAGACCAAATGTATACGATGAGATAGGAAATGCAACATTTAAGAATGATGAAGATTTGATAACGTTTCAAATAGATTTGGATTATACAGTAGAAAATATATTTAAAAATATGATATATAACGAAAGTGGTTCAAATAATAGTATATTAAATGATATATATATGCCATATAGGATTTTATTAAGTAAAGATAAAAATTATGTGTCTGTTCCTATTATTCGTATATATAGTTTAAGAAAAGATGGATGTAGTGTTTTAATA…	MEELKTCPFTNVIPYGLLYDKLKKEKNNDVPENYVIEEFDKLLKNYERPNVYDEIGNATFKNDEDLITFQIDLDYTVENIFKNMIYNESGSNNSILNDIYMPYRILLSKDKNYVSVPIIRIYSLRKDGCSVLINVHNFFPYFYVEKPDDFDNEDLIKLEMLMNENLNLNSQYKIYEKKILKIEIVKTESLMYFKKNGKKDFLKITVLLPKMVPSLKKYFEGIVHVNNKSIGGIVYEANLPFILRYIIDHKITGSSWINCKKGHYYIRNKNKKISNCTFEIDISYEHVEPITLENEYQQIPKLRILSFDIECIKLDGKGFPEAKNDPIIQISSILYFQGEPIDNCTKFIFTLLECASIPGSNVIWFNDEKTLLEAWNEFIIRIDPDFLTGYNIINFDLPY…	1094	0	null	no	GO_0003677, GO_0003887, GO_0003676, GO_0000166	GO_0003887, GO_0008310	GO_0003677,GO_0003887,GO_0003676,GO_0000166,GO_0003887,GO_0008310	0	0	0	0	0	0	0	0	0	0	0	0	0	0	0	0	0	0	0	0	0	0	0	0	0	0	0	0	0	0	0	0	0	0	0	0	0
4960	PF3D7_1438700	DNA primase small subunit	null	ATGAAAATGGAAATAGTTGGAGATATAAAAGATTCGATCGTTAACGAAAATGATTTAATATTTTATTACAGGAGCTTGTGTCCAATAAATGATTTATATAACTGGTTAAATTATAAAAATGATATTAAGGGTAAATATACCAAATTAAATGATCCTCATTTTTTTTCGAAAAGAGAATTTTCATTCACATGTAAAAAAAGTGATCAAGGAAAAGAAGAGATTTATATAAGATGGCTGTCCTTTAGTAACCCTGAAGAATTTAAGAATAAACTATTATCCGATCTAGTACCTATAAAATTTGATATTGGAGCTATTTATAATTTTCCTGTTTCTCAAAAAGATCAAAAAGGAGATATTTTTCTACCAGTCCAAAAAGAATTAATATTTGATATTGATATG…	MKMEIVGDIKDSIVNENDLIFYYRSLCPINDLYNWLNYKNDIKGKYTKLNDPHFFSKREFSFTCKKSDQGKEEIYIRWLSFSNPEEFKNKLLSDLVPIKFDIGAIYNFPVSQKDQKGDIFLPVQKELIFDIDMNDYDDIRTCCTDKKVCKLCWKFLTVAIVLLDTALREDFSFEHILWVYSGRRGIHCWVADESCRYYTTDARAALADYLNILSGSDTKKKKVSIWGKDKYPMFERAFDICYKYFDVLMEEQDFFKKGSPHVQKLIDYLPYASGKVTDPLKAMKLNELKEYINNNNFNSREIFEKFSSIYNFLTPSNYFKRKNVSGNINMPSFVKEIVFHFTYPRLDINVSKEINHLLKSPFCIHNSTGRVCVPLDIKNINNFNPQSVPTLKLLREQFD…	452	0	null	no	GO_0003896	GO_0003896	GO_0003896,GO_0003896	0	0	0	0	0	0	0	0	0	0	0	0	0	0	0	0	0	0	0	0	0	0	0	0	0	0	0	0	0	0	0	0	0	0	0	0	0
923	PF3D7_0509400	RNA polymerase I	RNAPI	ATGTACGATATAAATAAGTCAATATGTGCTGAGATAAAAAGTGCGGAACTTGATGTATTAAACAGTGGGGAGTTGAGAAGAATATCTATGGGTAAATACGAAAATGAGAAATATGAATATGAAAAAACTCATAAAAGTGGAGTTGTTACAAAAATGTATTATGACCCGAAATATGGTACTATTGATCATAATCAAATATGTTCAGTATGTTTTGAAAGGCACGAGAATTGTACAGGTCATATTGGTCATATTGAATTTGTTCTTCCGTTATTTAATCCATTATTTTATAAAGAATTACAAGAATTATTAAATTTGATTTGTTATCATTGTTATAATTTTTGTTGTTCTGAGGATGTCATTTTTTTATTAAAACATATTTTTCAATTGAAATCTTTGAAT…	MYDINKSICAEIKSAELDVLNSGELRRISMGKYENEKYEYEKTHKSGVVTKMYYDPKYGTIDHNQICSVCFERHENCTGHIGHIEFVLPLFNPLFYKELQELLNLICYHCYNFCCSEDVIFLLKHIFQLKSLNQIESTNKIKYKKNCDYEYIIDQVEKLYKKICKDSNISLDDIVEAIYDDYENVHEDKDGNFDESVDLLDSLEKIKDEPDEKNKNNNNKNNNNNNNNNNNNYNNDVDIDVDNNNNNVDINVDNNNNYFNSDLVDLAPNEEIYEEETDAGRSDDNNKENKPDYNKLKERIKKYKFDANKLAFQSNYNYEEYLILSKTIKLHMKKSSKCCFCKFQRNISAKVSQRRDTINFIGVHTNNPFFKKYMPKKKQKKNEKDDQEDVDDLENMNNI…	2914	0	null	no	GO_0003677, GO_0003899	GO_0003899	GO_0003677,GO_0003899,GO_0003899	0	0	0	0	0	0	0	0	0	0	0	0	0	0	0	0	0	0	0	0	0	0	0	0	0	0	0	0	0	0	0	0	0	0	0	0	0
4174	PF3D7_1329000	DNA-directed RNA polymerase III subunit RPC1, putative	null	ATGATGAAGAAGAAAAATATCGACATAGAGGAGCTTAAAAGGCTCATTGAAGAAAGCAGCATGAAAAAAAGATTTGTAAAAGATATAAAAAGAAATTGTGAAATAAAAAGTATAAGGTTTGGTATTATGAGTAAGGAAGATATAATAAAATATTCAGAAGTGAAAATAATGAATAGAGAAATGTATAAGAATAATAGTGGTATACCATATCCTTATGGTGTTTTAGATTTAAAACTAGGTGCTCATAAAAGTAACTCTGTATGTGAAACATGTAATAAGAAATTAATAAATTGTTCAGGACATTTTGGTTATATAGAATTGAATTATCCTGTATTTCATATTGGTTATTATAAATATATAATACATATATTATATTGTATATGTAAATATTGTTCAAGT…	MMKKKNIDIEELKRLIEESSMKKRFVKDIKRNCEIKSIRFGIMSKEDIIKYSEVKIMNREMYKNNSGIPYPYGVLDLKLGAHKSNSVCETCNKKLINCSGHFGYIELNYPVFHIGYYKYIIHILYCICKYCSSLLLSKEKIDFYCNLKKKSTDDSFYKKHLFKRILNNCKKVNKCYICGNPQGVIKKIIKPSLDQFMKLKHILKVKENGKMIIKEEDLNSLYVLKLFKNINPYHVKLLNIENPEKLIITALLVPPNTIRPSVIIDEHGTAEDDLTCILSEITQLNNTIYNQCTNGYQTNQFLGNVEFLQLQITRFINSDSPAVSQLLATQNISKPGRGICQRLKGKEGRFRCNLSGKRVDFSSRTVISPDPNISIDEVVIPKIIAMRLTYPETVNKYNI…	2356	0	null	no	GO_0003677, GO_0003899	GO_0003899	GO_0003677,GO_0003899,GO_0003899	0	0	0	0	0	0	0	0	0	0	0	0	0	0	0	0	0	0	0	0	0	0	0	0	0	0	0	0	0	0	0	0	0	0	0	0	0
3932	PF3D7_1304900	DNA-directed RNA polymerase II subunit RPB11, putative	RPB11	ATGTCTGTACCAACATTATCAAACAAGCCTGAAACTGTTGATTTGTTGGTATTAGCCCCAGGAGAAAAAAAAGTAACTTGTACCATATCTGATAAAGGAGATTGTAACATCTTTGTAATAAAATTGGAAGATCACACTATAGGAAATTTAATTAAAATACAACTCTGTCAAGACCCTAAAGTTCTTTTTGCTGCTTACAGACAACCACACCCTCTTCAAAATGCTATAGAAATTACTATTAAACCTAAGGGTTATGCAGGTGTGAAATTATTGTCAGATAATGTAAATAACATATTATCACAAGTTGCCACATTAAAGGAAAATTTTGCGAAAAAAATTCAAAAATATAAGGAAAGCAATTCTTATTATGAAGATTACTGA	MSVPTLSNKPETVDLLVLAPGEKKVTCTISDKGDCNIFVIKLEDHTIGNLIKIQLCQDPKVLFAAYRQPHPLQNAIEITIKPKGYAGVKLLSDNVNNILSQVATLKENFAKKIQKYKESNSYYEDY	126	0	null	no	GO_0003677, GO_0046983	GO_0003899	GO_0003677,GO_0046983,GO_0003899	0	0	0	0	0	0	0	0	0	0	0	0	0	0	0	0	0	0	0	0	0	0	0	0	0	0	0	0	0	0	0	0	0	0	0	0	0
4741	PF3D7_1415200	DNA-directed RNA polymerases I and III subunit RPAC2, putative	null	ATGGAAGAAAAAAAGTACTACGAAAATTTGAAAAATTTGACTCACGCAACCTTTTGCTTTGAGAATGAAGATCATACATTAGGAAATTGTTTGCGTTGTATTTTGTTACAAAAAGAAGGTGTGGAATTTGCAGGATATACAGTACCTCATCCAACTCAACCTGAAATTAATGTTAGAATTCAGACAACAGGAAAACCAGCTATAGACATTTTAAAAGAATCGCTAGATGATTTAGGAAATATGTGTGATATAATGTTGAACAAATTTAATGAGGCATTAAAACAGTCATGA	MEEKKYYENLKNLTHATFCFENEDHTLGNCLRCILLQKEGVEFAGYTVPHPTQPEINVRIQTTGKPAIDILKESLDDLGNMCDIMLNKFNEALKQS	96	0	null	no	GO_0003677, GO_0046983	GO_0003899	GO_0003677,GO_0046983,GO_0003899	0	0	0	0	0	0	0	0	0	0	0	0	0	0	0	0	0	0	0	0	0	0	0	0	0	0	0	0	0	0	0	0	0	0	0	0	0
188	PF3D7_0205500	DNA-directed RNA polymerase II 16 kDa subunit, putative	null	ATGGCAAATAATATCAATGGAGATATAAAAAATTTAGACCTTGGTCCTGATTTTAAGAATTGTAAATGTTTGAATTTATGTGAGCTTCAATTAATTTTGGGAGACCAGCTTCGATTAACATCCAAGAGAAATGAAGAAGCTCAAGCATTGATTAAATCGTCCTATGATTATGCCAATAAATTTGCTGCAATAAAAAATAGAAGTTCAATTGTCGATATTAGAACTAACTTAGAACGTATAGGCGATTTACATGAATATGAAATAGCCATGTTAGTTAATCTTTTACCTAAGACCATATTAGAAGCTAGATATTTAATTCCTTCGTTAATTCGTTTAAATGACGAAACCTTAAATTCTATTTTAGAACATCTTATAAGCTATAAAATGTACGTTTCTTAA	MANNINGDIKNLDLGPDFKNCKCLNLCELQLILGDQLRLTSKRNEEAQALIKSSYDYANKFAAIKNRSSIVDIRTNLERIGDLHEYEIAMLVNLLPKTILEARYLIPSLIRLNDETLNSILEHLISYKMYVS	132	0	null	no	GO_0003899, GO_0003824, GO_0000166	GO_0003899	GO_0003899,GO_0003824,GO_0000166,GO_0003899	0	0	0	0	0	0	0	0	0	0	0	0	0	0	0	0	0	0	0	0	0	0	0	0	0	0	0	0	0	0	0	0	0	0	0	0	0
3959	PF3D7_1307600	DNA-directed RNA polymerase alpha chain, putative	null	ATGTCATTATTATTCCTATTACTATTCTTTTTAACAGAGTGCAATATTTATTGGTCTTTTTGTGTAATTTTAAAAACTAAAAACCCGGCTTTCTTGCCCATACAAATTAAGAACCCTGAGAGACATAAACCCAATAATCTCAAACGATTTTATATCAACCAAAATGAGGGTGTGAAAAATAGAAAATATAACAACAGAGATATTTATAAATTTGAGGGAATTGATGAAGAAAATAAAGATGGGAAAGAAAATATTGACGAAGATTATTTGAAAGAATATGAAGAAGCATATCATAAATATGATGATATGGATGATGATGAAAGGAAAAGAAGAGGATCCGAAAATAAAATGAATTGGTTTGAAATAAGAAAAGGAGAAAAGGAAAGGGAACATCGATAT…	MSLLFLLLFFLTECNIYWSFCVILKTKNPAFLPIQIKNPERHKPNNLKRFYINQNEGVKNRKYNNRDIYKFEGIDEENKDGKENIDEDYLKEYEEAYHKYDDMDDDERKRRGSENKMNWFEIRKGEKEREHRYNVYDNEIIKKDLKEIDLERVDKMNRSIGELPPYIYEGGKVYEGMPMDYKPEIYDFHKYNKYFDDLCKEKKSLIDSYQLDKKLLDDTYYDAKRGGPKTFGFRFKQIQPVKYHEGRAYTYFFMHSHDVELSPIFLNAFRRVAIKHLKGGRVTALRIPNMKHEFYCIVGVRENFFDLAQNLRQITFKNVPEDVDMDNYMIGKFRIKGPMIVVAGHMQLPKNVEIVNRNQYICSVAAGSYLSMDVKIESIEEYVMPEYGSQSRNRDICKD…	619	0	HMM: MSLLFLLLFFLTECN, NN: MSLLFLLLFFLTECNIYWSF	yes	GO_0003899, GO_0046983	GO_0003899	GO_0003899,GO_0046983,GO_0003899	0	0	0	0	0	0	0	0	0	0	0	0	0	0	0	0	0	0	0	0	0	0	0	0	0	0	0	0	0	0	0	0	0	0	0	0	0
5300	PF3D7_1472700	DNA-directed RNA polymerase, alpha subunit, putative	null	ATGCCGTTTCTCGTCATTATTTCCATATGGTTACATACAATAATAGTAATATATAAATGTGTACATATTTTAAAATCTTCATATATTCCCAATGCTGAAAAATTGTTGATGTTTGAAAGGAAAAATAAAAGAGGAAAGATAAAATTGATTTTAAATAAAAATAAAGAAGAAAAAAGTATAAGAAGAAAATCATTAAAGAAATATATTGTTTATTCTATTAACAATGATAAAGAGTTTATACCGATAAATGATAATTATAAAATATTTCAAAAAAGAAATTTTATTAAAAAATATCATGTGAAGGATGAAGAAATAAAAGAATACATTGAAGAAATAAAGAAAAATAGAGCTAGTGGTTATGAACCTAAATTTCCTGAGGAGACCTTTCGAACGCCTGAT…	MPFLVIISIWLHTIIVIYKCVHILKSSYIPNAEKLLMFERKNKRGKIKLILNKNKEEKSIRRKSLKKYIVYSINNDKEFIPINDNYKIFQKRNFIKKYHVKDEEIKEYIEEIKKNRASGYEPKFPEETFRTPDGLTNIILDYKYKNDNLRIHNYYFFFLYFLKKLGDEEQRKIKLRKRMEGKNDEYGDSINDDVDNRMINVQEFLFLKKKGFFEGELYTWKNWVLLNRGEWRDTIVYGDEVDNNNNNNNSNSSSSSSSSSSSSSSSSSSSSSSSSSSSSSSSSNRSSNFCGDDNIYNVYNNYDDESYDIKTLRPLVEPKMKRMPIEYWGSFRAIDFNVNHYPIYKKLFDYFNKVNVNENDERGKFYPFLFFPRFGVGRDRSGLGYGDAQYFGNYGDFYE…	861	0	HMM: MPFLVIISIWLHTI, NN: MPFLVIISIWLHTIIVIYKCVHILKSS	yes	GO_0003899, GO_0046983	GO_0003899	GO_0003899,GO_0046983,GO_0003899	0	0	0	0	0	0	0	0	0	0	0	0	0	0	0	0	0	0	0	0	0	0	0	0	0	0	0	0	0	0	0	0	0	0	0	0	0
534	PF3D7_0318200	DNA-directed RNA polymerase II subunit RPB1	RPB1	ATGACGGTTGATTTGAATATTCCATATTCAGCATGTGAATTAAAGAGAGTAAAACGATTAGAGTTAGGTGTTTTGGATCCAGAAATAATAAAAAAGATAAGTGTTTGTGAAATAGTAAATGTAGATATATATAAAGATGGTTTTCCAAGAGAAGGTGGATTAAATGATATACGTATGGGTACTATTGATTATAGGACCTTATGTGGTACATGTAATATGAATGTAAAATATTGTCCTGGTCATTTTGGTCATATAGAATTAGCGAAACCTATGTATCATTATGGTTTTATGAATGTAGTATTAAATGTTTTAAGATGTGTATGTTATCATTGTGGTAGATTATTATGTAATGTGAACAGTTCTAAAGTTAAATATATTGAAAAGATTAAAGTAAATAGT…	MTVDLNIPYSACELKRVKRLELGVLDPEIIKKISVCEIVNVDIYKDGFPREGGLNDIRMGTIDYRTLCGTCNMNVKYCPGHFGHIELAKPMYHYGFMNVVLNVLRCVCYHCGRLLCNVNSSKVKYIEKIKVNSLRLRKLAELCLGIRACDHSVEEEGLNINDNSLNNFYNNDLSNLNMNQQMLLNKSNYTNIFEMVSKEDVDCGCVQPKYSREGPNMYIQFLHSSEEDIDESKRKLSAEEALEILKKIRKEEMSILGFNSDRCVPASLILTCIPIPPPCARPYVQYGNQRSEDDLTLKLLDIVKTNIQLKRQTDRGAKSHVLQDLCSLLQFHITTLFDNDIPGMPIATTRSKKPIKAIRTRLKGKEGRLRGNLMGKRVDFSARTVITGDPNLNIDYIGV…	2457	0	null	no	GO_0003677, GO_0003899	GO_0003899, GO_0005515	GO_0003677,GO_0003899,GO_0003899,GO_0005515	0	0	0	0	0	0	0	0	0	0	0	0	0	0	0	0	0	0	0	0	0	0	0	0	0	0	0	0	0	0	0	0	0	0	0	0	0
963	PF3D7_0513600	deoxyribodipyrimidine photo-lyase, putative	null	ATGGCAAGCGATAGGGATAATAAAGTAGATGGAATAGTACACGAAGCCCTTAAAAAGAAAGAAACGAATTTATTTCAAAAATCCGAAGTTATTAAAAAATTAAATGAAGAAAGAAAAGAGAAAATAATAATACAAGATGGACAAGAAAATAACTTGGATGAGAAAAAAAAAAAAAAAACGATAATAAAAAATAATGAAGATATATTAAAAGATAATATTAATAATTTAAAAAATAATAATAAAACTCACATAAATATTAATAAAGGCATTACCATATGTGAGAAAAATAATAATAATAATAAATATGAAATTCCCATTATAGGAGCATCTAAGAGAATGGATGATATTTCTTCTTATGATGAAAAAAAAGATATTATAACTAATGTAAAGGAAAATCAT…	MASDRDNKVDGIVHEALKKKETNLFQKSEVIKKLNEERKEKIIIQDGQENNLDEKKKKKTIIKNNEDILKDNINNLKNNNKTHININKGITICEKNNNNNKYEIPIIGASKRMDDISSYDEKKDIITNVKENHVDDKKKNIIIINKEDIQKDNTNSNVINNHMRYNKLNANICKYENVFSEKGNKTDIISCTFTDSNKKKQVSFFSQVDKNIMQQTKGNIKKKKKNDEQEEEEKEKEEEKEKEEEKEKEKEKVEEKEKEKVETYLKEPINKLLYKEQFCTDIYKMEILKKDENHKKSIEKNNIVVKGKQNINTSSKNNIFIPLQNNVYLPSQNNVYLPSQNNVCPPLQNNVYLPSQNNVCPPLQNNVCPPSQNKACPSSQNNVCPSSQNNVCPSSQNNV…	1113	0	null	no	GO_0003913	GO_0003904	GO_0003913,GO_0003904	0	0	0	0	0	0	0	0	0	0	0	0	0	0	0	0	0	0	0	0	0	0	0	0	0	0	0	0	0	0	0	0	0	0	0	0	0
5244	PF3D7_1467100	DNA-3-methyladenine glycosylase, putative	null	ATGGAAAAAATGAACGAATTCTCGAATAATAATAATAATAATAATAATGATGATGATGATAGAGGTTCACTAAAATTAAAACAATTACGTAATTCTATTAAGGGAAAGAAAAGAAAACATGATAGTATAACAAAAGACAATGATATAATAAATGCATCCAAGGTTATTATAAAAAAAAATGTTATGACGACACAACTGTTTGATGATATTAATAAATTGAGTTATGTATATTTCTTATTAAAATATTATTTTGATAATAATCCATTGAAAATATTAAATGAAAATTTCTATCTTAAAGATGATGTATTATATATTACAGAAATATTAATAGGTCATATTTTATGGGTTTTTGACGAGAAACAAAATAAATTATATGGTTCTAGGATTATTGAATTGGAA…	MEKMNEFSNNNNNNNNDDDDRGSLKLKQLRNSIKGKKRKHDSITKDNDIINASKVIIKKNVMTTQLFDDINKLSYVYFLLKYYFDNNPLKILNENFYLKDDVLYITEILIGHILWVFDEKQNKLYGSRIIELESYNGVNDKASHAYNNRKTNRNMSMFEKGGISYVYLCYGIHNCLNIVTNIQNIPDAILVRSTEPLYNIEYFLSNKFEKISQYLLSNSIFIHKNIKEQQKNNSTPKNKRNQQGNISNKDGNIINETNYLTKIDELINIFKMIKKKQLLKLCSGPGCVTKSQDITRQDDKQYFFVGTNIEKENKTNTINNNNNNKRNNCSNLQKNSKYFNNNDYIKKNNNKSNNIHSDNDCSIDISNCTKENKQTNHCKNEYIQDHVNYNELMEYYYFL…	501	0	null	no	GO_0003677, GO_0003905, GO_0003824	GO_0003905	GO_0003677,GO_0003905,GO_0003824,GO_0003905	0	0	0	0	0	0	0	0	0	0	0	0	0	0	0	0	0	0	0	0	0	0	0	0	0	0	0	0	0	0	0	0	0	0	0	0	0
409	PF3D7_0305600	AP endonuclease (DNA-[apurinic or apyrimidinic site] lyase), putative	null	ATGAAAATTACTAGTCTTCATTTTTTAATATTTCATAAAAACTTAAATTACGTTTCATCAAAAGTTAAAGCGAAAAAAATATTTTATCAGAGGGCTTTGAATAATATATATCTTTGTACTATTAGAACGATGATTGTTGATATAGCTGAAATAAAGAAAAGAGATAATCATGCATTAGACACTCAGGAATCGCAAGAATTGGTAAACAAAATAAAAGAAATAAAAAACAGTGACGAACAAAATAATAGTAATAATAATAATAATAATAGTAGTAGTAGTAATTTTTGTAGTAATAATAATTCTCCCTTTAGTCACAAAGAAACCAAACTTATGGTTAAAGAAGAGGTGCCAAATTCTATTGTTAAGAATATTCTAAATAATAATAGTTGTGCTACTAGC…	MKITSLHFLIFHKNLNYVSSKVKAKKIFYQRALNNIYLCTIRTMIVDIAEIKKRDNHALDTQESQELVNKIKEIKNSDEQNNSNNNNNNSSSSNFCSNNNSPFSHKETKLMVKEEVPNSIVKNILNNNSCATSIINNKFYTQINNIIPVKPEAMKEENINVSTVNTENDISKEKKENSHYFCDEIKVMKKEYSKDDFVTDVKLEMNDKEEEEEEKQKIGQESTHINIKVEKDTFNECNNSNVNEKKRNRSVDIHNELSNKRILTEDVVVKCNIKNDVKIIVTWNMNSITVRYKNKKKWDEFMNFFNNLNADVLCFQEVRLPAMNLSEPCDNKNKNKNKNDGIRDRGKIKNSDQKSLADYEIMEQILNDDFKDYNAYFSLANIKYSGQLVLVKKNIHIES…	617	0	null	no	GO_0004518	GO_0003906	GO_0004518,GO_0003906	0	0	0	0	0	0	0	0	0	0	0	0	0	0	0	0	0	0	0	0	0	0	0	0	0	0	0	0	0	0	0	0	0	0	0	0	0
3924	PF3D7_1304100	DNA ligase I	LigI	ATGAATTTCCTAATATTAGTTGTATTAATTAAGATGGTTGTATGTAAAATTATTAATTATGTTAGAAGTGATTATAATTTTATGCTGTCATTTTTAAGGACGAGAAAAATATTTAGTCATAAAAAGATTTATTTCAATTTTAAAGTTTCTAAGAATATTACAAAGAATTCATCATCTAATAGTTATAGTGATATATTAAAATGTTTCTCTTTTCCAAGAAAAGGAACTAACGATAAGACGAAGGAAAATGAAACATTTGAAAAAGGAGAAGTAAAAGAAGAAGAAGAAGAAAAAGATAAAAACGTCAAAAGGAAAATTATTAATGAAAGTAGTAAAAATAAAAGAGCTAAAGTTAAGAATGAAAATGATGTTATAAAAAAAGGGTCGTTATTTAATTGT…	MNFLILVVLIKMVVCKIINYVRSDYNFMLSFLRTRKIFSHKKIYFNFKVSKNITKNSSSNSYSDILKCFSFPRKGTNDKTKENETFEKGEVKEEEEEKDKNVKRKIINESSKNKRAKVKNENDVIKKGSLFNCVVREDEKVNDLSSPKFNPVHFNINDLYLSEKDKEKHKFKDSLLFTFLTNAFNQIEELKGSGTGSKKNVSIILSNIFRVLIYYSPNDLIPAVYITLNKVAPDYLNVEAGVGEALILKTMSEAYSRTESSIKKDLQQIEDLGIIAENCSCKMRTIFPLPRLTIQSVFHELKSIPNLIGSNSQQKKREVIKKLLVSAKTSEAKYIVRFLQQRLRIGVNSATVVQALSYAFILTRPSIPDDIIKRGKEINENLINGKLDGTNNLINKSNN…	912	0	HMM: MNFLILVVLIKMVVCK, NN: MNFLILVVLIKMVVCK	yes	GO_0005524, GO_0003677, GO_0003910	GO_0003910, GO_0005509, GO_0000287, GO_0030145	GO_0005524,GO_0003677,GO_0003910,GO_0003910,GO_0005509,GO_0000287,GO_0030145	0	0	0	0	0	0	0	0	0	0	0	0	0	0	0	0	0	0	0	0	0	0	0	0	0	0	0	0	0	0	0	0	0	0	0	0	0
934	PF3D7_0510500	topoisomerase I	TopoI	ATGCAATCAATGGAAATAAATGATAATAACAGTATCAAGAATGAAAGTACATCTGATGATGATATATTAATTAATAAAATTAAACAAAACTTGGGTAATAATAAATCATGTAATTCTAGATCTTCCAAAAAGGAATCTATAAAAAAGCAAAAGAGCAATTCTGAACTTGGTATAAAAAAGAACACAAAGAAATCATTAGGTATAAAAAAAGAGGAAGAAAAAAAAAAACAAATAAGCAAAAGAAAAAGTAATGAACTAAAAGAAAAAAATAATTTGAAAGAGGGAAAAAAGAAATATGTGGAAAAAAAATCTAGAACAGTAAAAGATGAAACCAAGTTAACGAATGTTATAAAAAAAGAAACTCAAAATAATAAGAAACCTAAAAAATTACTTAAAAAA…	MQSMEINDNNSIKNESTSDDDILINKIKQNLGNNKSCNSRSSKKESIKKQKSNSELGIKKNTKKSLGIKKEEEKKKQISKRKSNELKEKNNLKEGKKKYVEKKSRTVKDETKLTNVIKKETQNNKKPKKLLKKSEENFEPINRWWEKIDDQTDIQWNYLEHRGLIFSPPYVQHHVPIFYKSIKIELNAKSEELATYWCSAIGSDYCTKEKFILNFFKTFINSLENDNIIKQENETKLKKGDISNFKFIDFMPIKDHLLKLREEKLNKTKEEKEEEKKMRMEKELPYTYALVDWIREKISSNKAEPPGLFRGRGEHPKQGLLKKRIFPEDVVINISKDAPVPRLYDNMCGHNWGDIYHDNKVTWLAYYKDSINDQIKYTFLSAQSKFKGYKDLMKYENAR…	839	0	null	no	GO_0003677, GO_0003917, GO_0003918	GO_0003917	GO_0003677,GO_0003917,GO_0003918,GO_0003917	0	0	0	0	0	0	0	0	0	0	0	0	0	0	0	0	0	0	0	0	0	0	0	0	0	0	0	0	0	0	0	0	0	0	0	0	0
4909	PF3D7_1433500	DNA topoisomerase 2	TOP2	ATGGCGAAAAATAAAACTATTGAGGAGAGGTATCAGAAGAAGTCTCAAATCGAACATATTTTGTTAAGACCTGATACCTACATAGGAAGTGTAGAAATGCATACTCAGTTATTATGGGTATGGAATAAAGAAAAGAATCGTATGGTTCAAAAGAATATTACATATGTACCAGGTTTGTATAAAATTTTTGACGAGATTATAGTAAATGCAGCAGATGTTAAAGCAAGAGAAAAAGAGAAGAGCGAGAATCCTATGACATGTATCAAAATTGAAATAAATAAAGAAAATAAGCGAATAAGTGTATATAATGATGGGGAAGGTATTCCTGTAGATATACATAAAGAAATGAATATATATGTACCACATATGATTTTTGGAGAATTATTAACTTCTGATAAT…	MAKNKTIEERYQKKSQIEHILLRPDTYIGSVEMHTQLLWVWNKEKNRMVQKNITYVPGLYKIFDEIIVNAADVKAREKEKSENPMTCIKIEINKENKRISVYNDGEGIPVDIHKEMNIYVPHMIFGELLTSDNYDDAEDRITGGRNGFGAKLTNIFSKEFIVQCGDSSRKKEFKMTWSDNMSKFSEPHIKNYNGKDYVKVTFKPDLNKFGMTEMDDDIESLLFKRVYDLAGTCSVRVYLNGQRLAVKDFKSYVDLYLKDNSNDNKNNKGQNDNNNNNNNNNDENANQNNDNLDVSLSNEPADGTPTKNNNNNNNNNDEDEIVKIHEKQHRWEIVVSKSDGSQFQQVSFVNSICTTKGGSHVNYIVEQLLSSLSKKANAKNKGGMEIKSGHIRNHLWVFV…	1472	0	null	no	GO_0005524, GO_0003677, GO_0003918	GO_0003918	GO_0005524,GO_0003677,GO_0003918,GO_0003918	0	0	0	0	0	0	0	0	0	0	0	0	0	0	0	0	0	0	0	0	0	0	0	0	0	0	0	0	0	0	0	0	0	0	0	0	0
2610	PF3D7_1015000	FAD synthetase, putative	null	ATGGATAGCAAAGACAATGATGTATGGAATGATTATTCAAATTCATTGATGTTATATGAAAGGATAGAAAATTTATATAATGATCATTTGATTGAAAAAAGTAAATTAAATGAACAGAATAAAGAGTTAATTAATAACAATATGACCCATGTTCAGAGGGAAACAAAAAATGTTATTAGAAATAAGGATATGATTAAGGCAAATATGTATAATTATGATATAATAAATTATTATAATGATGAATTTATATTAAAAAAAAAAGTGATGGAATTATCGGAAGATATAATGATGGGTATAGATTATATTTATGATATTTTCCGTTTATGTAAAGAGAGCAATGTCTTTTTATCATTTAATGGTGGAAAGGATGCTGTTGTTATTTTACATTTATTTCGGTGT…	MDSKDNDVWNDYSNSLMLYERIENLYNDHLIEKSKLNEQNKELINNNMTHVQRETKNVIRNKDMIKANMYNYDIINYYNDEFILKKKVMELSEDIMMGIDYIYDIFRLCKESNVFLSFNGGKDAVVILHLFRCAYAKYLKDMNIKRKKPQLIYFKDEMNEFPEVYQFLNESAFMFDFHISIIKGTWKNGITNFIENVQKKYQITIIDQLKTNSIDPTIFYSTLAFINGTRFNDTNTEKLQILNVSSRGLPPYLYVNPVFYWTYGAIWTFILYFKFNYCILYDHGYSSIGSIKDTVKNEFLKCNDCYLPAYFLKNWNYERYNRIQPNDK	328	1	null	no	GO_0003824	GO_0003919	GO_0003824,GO_0003919	0	0	0	0	0	0	0	0	0	0	0	0	0	0	0	0	0	0	0	0	0	0	0	0	0	0	0	0	0	0	0	0	0	0	0	0	0
2586	PF3D7_1012600	GMP synthase [glutamine-hydrolyzing]	GMPS	ATGGAAGGAGAGGAATATGACAAGATTTTGGTATTGAATTTCGGTTCTCAATACTTCCATTTGATTGTAAAAAGATTAAACAATATAAAAATATTTAGTGAAACTAAAGATTATGGTGTTGAATTAAAAGATATTAAGGATATGAATATAAAAGGTGTTATATTATCTGGTGGTCCATATTCAGTAACAGAGGCTGGTTCTCCACATTTAAAGAAAGAAGTGTTTGAATATTTTTTAGAAAAGAAGATTCCAATTTTTGGTATATGTTATGGTATGCAAGAGATAGCAGTACAGATGAATGGTGAGGTTAAGAAATCTAAGACATCCGAATATGGATGTACTGATGTAAACATATTAAGAAATGATAATATTAATAATATAACATATTGTAGAAATTTT…	MEGEEYDKILVLNFGSQYFHLIVKRLNNIKIFSETKDYGVELKDIKDMNIKGVILSGGPYSVTEAGSPHLKKEVFEYFLEKKIPIFGICYGMQEIAVQMNGEVKKSKTSEYGCTDVNILRNDNINNITYCRNFGDSSSAMDLYSNYKLMNETCCLFENIKSDITTVWMNHNDEVTKIPENFYLVSSSENCLICSIYNKEYNIYGVQYHPEVYESLDGELMFYNFAYNICKCKKQFDPIRYHELELKNIEKYKHDHYVIAAMSGGIDSTVAAAYTHKIFKERFFGIFIDNGLLRKNEAENVYTFLKSTFPDMNITKIDASENFLSNLQGVTDPEQKRKIIGKLFIEEFEKAVNNIDIDINKTFLLQGTLYPDIIESKCSKNLSDTIKTHHNVGGLPKNLK…	555	0	null	no	GO_0005524, GO_0003922, GO_0016462	GO_0003921	GO_0005524,GO_0003922,GO_0016462,GO_0003921	0	0	0	0	0	0	0	0	0	0	0	0	0	0	0	0	0	0	0	0	0	0	0	0	0	0	0	0	0	0	0	0	0	0	0	0	0
484	PF3D7_0313500	Ras-like G protein	PfG	ATGAAAAATGTTTTAAAAAAAGAGTTCGTAAGAAGCTTTTGCTACAAAATATGTATCGCAGGAGCCTGTAATAGTGGTAAATCATCCTTTAATAATGATTTATTAGATAGATTAAATGTTAGTCATAAAAAATCAGTTATTAGTAATGTGGATAATTATTGTATAAACAATAATGAGAATATTTTTAAACTTCATAAAAAGAAATGTTCTGTAACGGATACAATAGGATTAAATGAACGAATGATAAGTAAATTAGAAAAATGGAAATTAGAAGGGTATAATATGGATATGGAAAATAATAATATTTTAAAAAATTATTATAATTTAATTATGGATAGTAATTTAATATTTCTATGTATAAAACATACAGAAATAAGACAATGTGATATTCTCTCATAT…	MKNVLKKEFVRSFCYKICIAGACNSGKSSFNNDLLDRLNVSHKKSVISNVDNYCINNNENIFKLHKKKCSVTDTIGLNERMISKLEKWKLEGYNMDMENNNILKNYYNLIMDSNLIFLCIKHTEIRQCDILSYNIIKDMYKNLDNIYTIVYNNIKDGTNTQHTHIQSYNFLDIYEDFTNIIFYPYDINEDLTNVIKEKIINFYEIKKVTSQQNDDQFKDHHELKNDISQDNDNILKNCHINKNLLNTLNKKEEEKEEELLFNNNQMYDIIDESVRIFHPSMSSETRNYFYKFVNLKKKDKSNMKLFNDYFSERILNRTPRKIGQVEFDEKKNKIINNENNENVKNNENVKNNGNSDNNGNSDNNGNSDNNGNSDNSDNNGNSDNNDNSDNNDNNVITMN…	911	0	null	no	GO_0005525	GO_0003924	GO_0005525,GO_0003924	0	0	0	0	0	0	0	0	0	0	0	0	0	0	0	0	0	0	0	0	0	0	0	0	0	0	0	0	0	0	0	0	0	0	0	0	0
1924	PF3D7_0817100	tRNA modification GTPase, putative	null	ATGATAAAGAGACCCTTTGTTCATTTCGTTTTGTTAAAATGCATTACCGTGACACTTTTTTTATTTATTATTTTCGTTGACACGTTTAAAGGAAAGAGGAGAAATAAACCGAAACGTTTTCCCTTTTTTATTCCATTGAAGATTATGAAATGTAGAAAAGAAATGCATCTAATAAAGAGCAAAATAGGGAATAGAAAAATGTTCGAGCAGAAGGAAAACATTTTAAGTTTAAATATGGAGGAAGAATCATTTATTGATAAGAATGAGCAAAATAAAGAATGCGAGAAAAAAAATATGGATATCAATACAATTCATAATTTTCTTGTAAACAATAATTTTGCATCCAATGAAGATGAAAAAAAAAAAAATATATGTGATAACATATCAACATATTACAGT…	MIKRPFVHFVLLKCITVTLFLFIIFVDTFKGKRRNKPKRFPFFIPLKIMKCRKEMHLIKSKIGNRKMFEQKENILSLNMEEESFIDKNEQNKECEKKNMDINTIHNFLVNNNFASNEDEKKKNICDNISTYYSEANNNMINYVTNYDDVRKEYLLKIMSDKETIYALSSGNVQSAISVIRISGPLSKMILEILLHKGKDKKIKINNNNNNNNNNKNNICYNNYGKRQHFKKDNINRICNEKRTTNDVYNLSYETSGNEKLGDYNLHDIIHMRKNLEERKLYMGKLYDKNNDIIDIVMYSYFKEPKSYTGEELVEIYCHGNMLIVKEIMSAINNMNELFYKIIIEERQNNIYNNDMLCSFIEDNNNNNNNNTKYDTNEGNNNPTNDHIIYEKIHERCHHN…	830	1	HMM: MIKRPFVHFVLLKCITVTLFLFIIFVDTF, NN: MIKRPFVHFVLLKCITVTLFLFIIFVDTF	yes	GO_0005525	GO_0003924	GO_0005525,GO_0003924	0	0	0	0	0	0	0	0	0	0	0	0	0	0	0	0	0	0	0	0	0	0	0	0	0	0	0	0	0	0	0	0	0	0	0	0	0
4046	PF3D7_1316200	ADP-ribosylation factor, putative	null	ATGAATGTTTTAGATGTTTTAAAAAGATGGTTTATTCTTGTTTTTTTTATGTTACAACGTTTTTTTGAATTTAAATCAAAAATAACCAAAAAAAGTTTCATTATTTTTGGATTGCCTTCATCTGGAAAAACATCCATAATATATTTTTTCAAGCTTGGATATTTAATAACGACTGTAAGTACCCTTTTTATTAATGAAGAGAATTTCAAGATAAATTTAAAAATTGAAAAAGACGACACGAAGGAACAAAATTATGATATTACATTTTATGAAGTTGGAAAAAATTGTTCTTATAATTTAATAAAAGAATATTCAGATATATCTAATGATGTTATATATATTGTTGATAGTGTACAAAAAGGAAACTTAAGTGAAGCAAGAGATGATTTTATACGTATT…	MNVLDVLKRWFILVFFMLQRFFEFKSKITKKSFIIFGLPSSGKTSIIYFFKLGYLITTVSTLFINEENFKINLKIEKDDTKEQNYDITFYEVGKNCSYNLIKEYSDISNDVIYIVDSVQKGNLSEARDDFIRILYEFRFIYRKCKFLIFMNKQDSNGCLSSQEIINFFALPKDLLIRCNFISCSTLSGQGLKEGLEWLLYYNLPFYNNELNCIDRRTATKHLEL	224	0	null	no	GO_0005525	GO_0003924	GO_0005525,GO_0003924	0	0	0	0	0	0	0	0	0	0	0	0	0	0	0	0	0	0	0	0	0	0	0	0	0	0	0	0	0	0	0	0	0	0	0	0	0
4470	PF3D7_1359800	ADP-ribosylation factor, putative	null	ATGGGTAATACTGTAAATAAAAAGACAGTTGTTACTAATGAAAATGTAAAGGTTAAAACGATAATACCCCAAAAAAAGTATAATATTTTAATTTTGGGCCTGAATGGGTCAGGTAAAACGACATTATTATATCATAATTTTATTCCAGAATGGACAAATATAACGTCTTATATGGAGCCCACAATTTCGTATCATTATGAGGAAATTAAATGGATAAATGGAAGACTTGGTTTTTGGGATTTATCTGGAAATCCTTTGATGAGAAATATTTGGCCATTAATATATAGAAATGTAAAAGTGAACGCAATTTTATATATTATTAACATTATGGATATATCAGATGAATGTATATCGGAAAATAACTCATTAATAAGCCTTTTGCTAAATGATGAATGTTTA…	MGNTVNKKTVVTNENVKVKTIIPQKKYNILILGLNGSGKTTLLYHNFIPEWTNITSYMEPTISYHYEEIKWINGRLGFWDLSGNPLMRNIWPLIYRNVKVNAILYIINIMDISDECISENNSLISLLLNDECLQTSCIVLVFNTFNEVHNIQENLKNDMLIKYKIEDLINHYGNRIHYLFVDCKNCKMDKGWIQLMQQISYYF	203	0	null	no	GO_0005525	GO_0003924	GO_0005525,GO_0003924	0	0	0	0	0	0	0	0	0	0	0	0	0	0	0	0	0	0	0	0	0	0	0	0	0	0	0	0	0	0	0	0	0	0	0	0	0
4813	PF3D7_1423000	nucleolar GTP-binding protein 2, putative	NOG2	ATGATAAAAAAGGGGAGCTTGAAGATAAAAAACCTAAGCGTGGCGAAGAACCGCGTTAATAATGTTAAGGAAAATGGGCGCTTAATAAATAAAGGTAATGGGCAAGAAAAAAAAGAAGCAGAAAAGTTAAAAAGATTAAAAATGTATCGTACGAAAGCAAATTTAAAAAAAATGAACCAGAAAATTAATGAAGTAAGAAGAATCGAACCAAGTATTAAATGGTTTAATAATACAAGAACAATAAGTCAAAATAAATTAGAAATATTTAGAAATAAATTAGAAGAAACTACACATGATCCATTTAGTATTGTAATAAAACGATCTAAAATTCCTGTAGAGTTATTAAAAGATGAAAAAAATGTAGTTACAAAAAAATATAAAAACGAAAATTTTCTTCGT…	MIKKGSLKIKNLSVAKNRVNNVKENGRLINKGNGQEKKEAEKLKRLKMYRTKANLKKMNQKINEVRRIEPSIKWFNNTRTISQNKLEIFRNKLEETTHDPFSIVIKRSKIPVELLKDEKNVVTKKYKNENFLRIEKYHDIYSKKKKRKKPKLNVGTLEEYAKRAEQNLSTYETKNDNSLIEKRNEIEKKFSKDQLLKIGQSKRIWAELYKVIDSSDILLQVLDARDPIGTRCKKLEETLKKDRPNKHMILILNKIDLIPVSVAEKWIKILSKDYPTIAYHANINKPFGKSDLFNIIRQYTDFFKSQKKKHIHIGLIGYPNVGKSAIINSLKKKVVCISACIPGQTKYWQFIKLTNKIYLIDCPGIVPYDIEDSEKILRCTMRLEKITNPHFYIDDIFKM…	487	0	null	no	GO_0005525	GO_0003924	GO_0005525,GO_0003924	0	0	0	0	0	0	0	0	0	0	0	0	0	0	0	0	0	0	0	0	0	0	0	0	0	0	0	0	0	0	0	0	0	0	0	0	0
4993	PF3D7_1442000	ADP-ribosylation factor, putative	null	ATGGTATTGTTAAAAATTCTAAAGAAAATAAAAGATAATAAAAGGAATTTAAGAATACTAATATTAGGGTTAGATAATGCTGGGAAAACAACTATAATAAAAAGATTATTAGGTGAAGATATTTATAGTGTTAGTCCAACATTTGGATTTAATATTGAAACATTAGAATTTGGTAATAATATTCTTAACATATGGGATATAGGAGGACAAAAGAGTATTCGTCATTTTTGGAAAAATTATTATGAAGATGTAGATGGTATTATTTTTGTTGTTGATAGCACGGATTTGTTTCGATTACAATTATGTTCATTTGAATTGAAACAAATATTAAAGGAGGAAAGATTATATGGATCTACTTTATTAATTTTATCAAATAAAGTGGACATTGATAAATCTCTA…	MVLLKILKKIKDNKRNLRILILGLDNAGKTTIIKRLLGEDIYSVSPTFGFNIETLEFGNNILNIWDIGGQKSIRHFWKNYYEDVDGIIFVVDSTDLFRLQLCSFELKQILKEERLYGSTLLILSNKVDIDKSLTINQIVEILKLNEMNMDRHWCINECSAFSGKGLLKSFMWLIDDITDRIDS	183	0	null	no	GO_0005525	GO_0003924	GO_0005525,GO_0003924	0	0	0	0	0	0	0	0	0	0	0	0	0	0	0	0	0	0	0	0	0	0	0	0	0	0	0	0	0	0	0	0	0	0	0	0	0
60	PF3D7_0106800	ras-related protein Rab-5C	RAB5c	ATGGCTTATTATTTATCAAATTTAAATAATAATGAAAAATATGAAACCAACCAAAGTTATAATTCTACAAAAGTTTTTAATTCTAAACTAGTTTTATTAGGAGATACATCTGTTGGGAAATCTTGTATCGTTGTAAGATTTGCTAAAAATGAATTTTATGAATATCAAGAATCAACTATTGGTGCTGCTTTTATGACCCAGTTAATTGATATTGGTGAATGCACGATTAAATTTGAAATATGGGACACAGCAGGACAAGAACGTTATAGAAGTTTAGCTCCGATGTATTACAGAGGTGCATCGGCAGCCGTTATAGTTTATGATATAACAAATAAAAAATCCTTTGAAGGAGCTAAAGGATGGATTCATGAATTAAAATCAGTACACTCAAATGATATA…	MAYYLSNLNNNEKYETNQSYNSTKVFNSKLVLLGDTSVGKSCIVVRFAKNEFYEYQESTIGAAFMTQLIDIGECTIKFEIWDTAGQERYRSLAPMYYRGASAAVIVYDITNKKSFEGAKGWIHELKSVHSNDIIIALAGNKNDLEEHRAVDRELAESFANSNNILFIETSAKTGQNVNELFLRIAKKLPLHKKEQEKCPAIQINNTEETKKKCC	214	0	null	no	GO_0005525, GO_0003924	GO_0003924	GO_0005525,GO_0003924,GO_0003924	0	0	0	0	0	0	0	0	0	0	0	0	0	0	0	0	0	0	0	0	0	0	0	0	0	0	0	0	0	0	0	0	0	0	0	0	0
3313	PF3D7_1145400	dynamin-like protein	DYN1	ATGGAAACGTCAATGTACAATAACCTACGAAAATTAATTAACGTTATCGACGAGTTGAGAGATATTGGATTGCAGAAATATATAAATTTACCAAGAATATGTGTTGTGGGTACCCAAAGTAGTGGTAAGAGTAGTGTTCTTGAATCCATTGTAGGTATGGATTTTTTACCTAGAGGTGAAGGGATTGTAACAAGGAGACCGATTGAATTTCGTTTAATACATATAAAAGAAGATAGTGAAATTAAATATTGGGCAGTATTTGAAAATGAGAAGAATAAAAAGTATACAGATTTTAATGAAGTAAGGGAACAAATAAATAGATTAACAGATGAAATAGCTGGAAAAAATAAGGGGATAATTGATGAACCTATTGTATTAAATATATATTCAATTAAATGT…	METSMYNNLRKLINVIDELRDIGLQKYINLPRICVVGTQSSGKSSVLESIVGMDFLPRGEGIVTRRPIEFRLIHIKEDSEIKYWAVFENEKNKKYTDFNEVREQINRLTDEIAGKNKGIIDEPIVLNIYSIKCPDLSLIDLPGITRVPLKNSDQTDDIERLTRDMALRYVKDPRTIILAVLPANADMSTSDALQIARKVDPKGLRTIGVITKIDLMDKGADASKMLLNDEINLRLGYTGVVNRSTADIKKGKTISQALKDELEFFQKHPVYKKLPPALYGTNSLTDKLTKVLLRHIKNFLPDIKIEINDKIRYINDKLYELGTNVPLDATKKTQLLWSMITDYCEIFKNTLKGKYDKRVQVFIENNDILCGLKVRTIFNEFLDEYVGKNVTSELTDNDI…	837	0	null	no	GO_0005525, GO_0003924	GO_0003924	GO_0005525,GO_0003924,GO_0003924	0	0	0	0	0	0	0	0	0	0	0	0	0	0	0	0	0	0	0	0	0	0	0	0	0	0	0	0	0	0	0	0	0	0	0	0	0
2840	PF3D7_1037500	dynamin-like protein	DYN2	ATGGATAAATTAGTACCGATTGTAAACAAATTACAGAATGTTTTATCATCTTTTATTAGTAGTGAAACCTTGAGCTTACCACATATAGCAGTGGTAGGGGCTCAATCAGTTGGAAAAACCTCATTACTAGAATCATTAGTAGGTTTAAGTTTTATGCCTAAAGGAGAAGATATAGTAACTCGGACTCCAATAATAATTCAGCTAACGAATTCTAAATCAGATGATTGTTATTGTACCTTAACATATTGTGATTATGATAATAATAGAGTAGAAAAACATATAGATGATTTTTCTATTTTGAATGAAATATTAATTGACGTTACAGAAGAAATTACTGGGGGTAATAAATGTATTAAAGAAACTCCTATTATAATTGAGATTCATAAAAATGATGTTTTA…	MDKLVPIVNKLQNVLSSFISSETLSLPHIAVVGAQSVGKTSLLESLVGLSFMPKGEDIVTRTPIIIQLTNSKSDDCYCTLTYCDYDNNRVEKHIDDFSILNEILIDVTEEITGGNKCIKETPIIIEIHKNDVLDLTLIDLPGLTKVPVGNQPQNVEEQIVNLVNKYIKNPNCIILAVSSANIDLANSDSLKMARNVDPKHERTIGVITKCDMVEKPEIWKKMISGSLYPLKKGFVAVVCRSQKDVEDDITIEMSIKKEEEYFSQCIDFSNQMECIMECGIKNLAKKLNNILIEHIKNTVPFLKPKIDSLKSIEEERLLELGEPMDNMNRSEYLAVLVNYITKFSQQYQDIIDGKVFYKDRVDELKGGARIHYIFNDWYIKSLNDFSPLEMLTDEEIRIA…	709	0	null	no	GO_0005525, GO_0003924	GO_0003924, GO_0003777	GO_0005525,GO_0003924,GO_0003924,GO_0003777	0	0	0	0	0	0	0	0	0	0	0	0	0	0	0	0	0	0	0	0	0	0	0	0	0	0	0	0	0	0	0	0	0	0	0	0	0
5283	PF3D7_1471000	RNA 3'-terminal phosphate cyclase-like protein, putative	RCL1	ATGGAATTCTACGGAAGTAATTTTTTCCGACTGCGGCTAGCTTTAAGCCTAATAAGTGGTAAAGCCATAACAATAAAAAATATCCGAAAGAAAAGAAAGAGTATAATTAAAAATGGAATGAATAATGAAATGGATATACAAGAAGAATTACGGAAGAACAAAGATGGTGATAATTATAATAAATATGGTCTTAAAGAATATGAAGCAAAAATATTAAAATTAATTGATAAATTATGTGATAATACTACTATAAAAATAAATGAAGAAGGAGATGAATTATATTTCGAACCCGGATATCTTATTGGTAATACAAATGAAGAAGATTCAAGGAATATGTATAATATGACATTTCATTGTGGTAAAGAAAGAAGTATAACATATTATTTAGAATTTTTGATT…	MEFYGSNFFRLRLALSLISGKAITIKNIRKKRKSIIKNGMNNEMDIQEELRKNKDGDNYNKYGLKEYEAKILKLIDKLCDNTTIKINEEGDELYFEPGYLIGNTNEEDSRNMYNMTFHCGKERSITYYLEFLIMIVLFFKNPVNILLKGITDDYIDNNVYTCKIICEHFFKEILKLNEDFLYINILKRSTKPECSGEVHFFMRNIKKINPFDITNVGVVNKISGSILSNNISLMFRNKIMNFAKKQLYHFTPYINIDVQKEDDKKNKNINSHFISFSLFAHTKCNCIYAADICVDELFLKKLKEGINHRDKHEHMQDSSNILEDKQHYMNGNYHTNDENIVPSYTQKDQQNNIITKHINNNLHDVDIYERLGFFISLKMINQIKGLSSVDTNYQWLPLL…	467	0	HMM: MEFYGSNFFRLRLALSLISGKAI, NN: MEFYGSNFFRLRLALSLISGKAITI	yes	GO_0003824	GO_0003963	GO_0003824,GO_0003963	0	0	0	0	0	0	0	0	0	0	0	0	0	0	0	0	0	0	0	0	0	0	0	0	0	0	0	0	0	0	0	0	0	0	0	0	0
2738	PF3D7_1027400	DNA-directed RNA polymerase II subunit RPB7, putative	RPB7	ATGTATTTTGTTATTGAAGAATGGAAAAATGTAATCATTAAACCAAGCCAACTAGGCCCCAGATATCAACAATATATTGAAGATATGTTAAGGAATAGTGTAGAAGGGCAATGTAGTGTAAAATATGGATATGTTATTTGTGTTATTAGAATAATTCATAGTGAACCTGGGCGAGTTCAGGATGGAACTGGTATGATTGTAGTTAAGGTTAAATATCAAGCCATTGTTTTTAAGCCTTTCAAAGATGAGGTATTGGATGCCATTGTAACGGACGTGAACAAGTTAGGTTTTTTTGCTCAAGCAGGTCCATTAAAAATATTTATATCAAGAACGGCTATTCCAAAATATTTCGAGTATTCTGAGGATTTACATTACCCCTGTTTTTCATCAGGAGATTAT…	MYFVIEEWKNVIIKPSQLGPRYQQYIEDMLRNSVEGQCSVKYGYVICVIRIIHSEPGRVQDGTGMIVVKVKYQAIVFKPFKDEVLDAIVTDVNKLGFFAQAGPLKIFISRTAIPKYFEYSEDLHYPCFSSGDYNIKPQTTVRIKLQGIRYDLSNMFAIATINNEYLGCIESNILQVM	177	0	null	no	GO_0003899, GO_0003723, GO_0003676	GO_0003968	GO_0003899,GO_0003723,GO_0003676,GO_0003968	0	0	0	0	0	0	0	0	0	0	0	0	0	0	0	0	0	0	0	0	0	0	0	0	0	0	0	0	0	0	0	0	0	0	0	0	0
564	PF3D7_0321200	UDP-N-acetylglucosamine--dolichyl-phosphate N-acetylglucosaminephosphotransferase, putative	ALG7	ATGAAGAATAAAATTTTAAAAAATTATGTTAAGCCTAATAAAGTCATAATATATAAACCTAATATATCTGAAAGGTGTTTGTTTCTTATTCTTACAATTTATTTATTATTTGTTTTATATGTGTTAAAAAATACAGTGTATAGAAACATAATTCTCCTTTATATTGCACCTTGTTTCATACTTTTTAAGGTTACCTTTATATGTTTACCAAAGTTTATACATTTCCTCAATGAAAAAGGCTTATGTGGAATCGATTTGAATAAAAGTGGAAAAGAATATGTTGCTGAGCCTATTGGTTTATTTCCATCCATTCTATATTTCATATTTGTCTTATTTTATCAGCTGATATATTATAATGATCATAGAATCTTATTGGAGTACAACGCAGGATTACTGTCA…	MKNKILKNYVKPNKVIIYKPNISERCLFLILTIYLLFVLYVLKNTVYRNIILLYIAPCFILFKVTFICLPKFIHFLNEKGLCGIDLNKSGKEYVAEPIGLFPSILYFIFVLFYQLIYYNDHRILLEYNAGLLSIIFMTFLGFIDDILDLKWRYKVILPFFASLPLLLSYSGETHIRIPNFLIFIFKHRIINIGFLYYVYIILLSVFCTNAINIYAGINGLEIGQSLIISFFITIHNLIEITLNIGKSPIIENLILKQHFLSIIFTIPFLTINLATFSFNFYPSKGFVGNTLTYFCGMFLAVVSIFGHFSKTLVLFLIPQFLNFFISLPQLFHIIPCPRHRLPIINYKTNKLMYSHNYTLINLILYLFGPLSEYHLVLILLTFQFLTCSFGLFLRYYI	397	12	null	no	GO_0008963	GO_0003975	GO_0008963,GO_0003975	0	0	0	0	0	0	0	0	0	0	0	0	0	0	0	0	0	0	0	0	0	0	0	0	0	0	0	0	0	0	0	0	0	0	0	0	0
4311	PF3D7_1343600	UDP-N-acetylglucosamine pyrophosphorylase, putative	null	ATGCAAAAAGTTTTTGAACTGTTAGAACAATACAATCAAGATTTGCTTCTAGAGTATTTTAAAAAGTTTCCATCATTTGATTTTAATAATTTAAATGCGAACGATTTAGAACATTTTTTACAAAATTTGAACAAAATAAAAAATGAAGATAAAGAAAAGAAAGAATATTTAATATCACCACCTGAAATTATTGATATTGATAGTATTTATAATTGTAGTAAGCCACCAAATGGTAGTATATTTATCAATACATATAAAAAAGAAAATTTATGTAATGAATTAAATGAAATAGGTATAGAGATTATTAAGAAAAATCAAGTTTCTGTTTTATTCTTAGCTGGAGGATTAGGTTCTAGGCTTGGATTAAATAAACCTAAAGTATTATTAGAAGTCACTCCT…	MQKVFELLEQYNQDLLLEYFKKFPSFDFNNLNANDLEHFLQNLNKIKNEDKEKKEYLISPPEIIDIDSIYNCSKPPNGSIFINTYKKENLCNELNEIGIEIIKKNQVSVLFLAGGLGSRLGLNKPKVLLEVTPLTNKTFLQFFFEQIIFLQEYCSLYEKKEHLNKINDNHKLVNSDNFKKGINNNIHINKNNDMYSNNNNNNNIDYNKSEHSKSSITNLNNIKGTNYNKCKINLDKHQFKNQEKKETLIYIYIMTSNFTHDNIVTYLQNNNFFGLKKEQVIFFKQCDNFSTDMNYNLLLSSPEIFLENPGGNGCIFKALDRYNIIDHMIKQNIKYTQIISIDNILNKIADPILIGFSSSFNCDIANKAVQREDEESMGVFCLKEKVKNKINKKYNKKNK…	593	0	null	no	GO_0070569	GO_0003977	GO_0070569,GO_0003977	0	0	0	0	0	0	0	0	0	0	0	0	0	0	0	0	0	0	0	0	0	0	0	0	0	0	0	0	0	0	0	0	0	0	0	0	0
5081	PF3D7_1450900	acetyl-CoA acetyltransferase, putative	null	ATGTTAATAAATAACCTGAGAAAGGTTTTTATTGTTGGTTTTGCTAGAACCCCCATTGGCGCATTAGGTGGATGTATTTCACATATACCAGTTCACAAATTAGCTTGTGCTACCATTTTAAAAGCTCTTGAGAGAAGTCAAATAGAGAAAGAACACATTGATTGCTTAATTTTTGGTCAATCATTTTCTAGTGGTTGTGGTCCGGTACCATTGCAGAAAATTGCCATATCAACCGGTATGCATATAAATACCAAAACTTATCTTGTGAATAATCTATGCTGTAGTGGTTTAGATTCTATAACGATTGGATATGATCTAATTAGGGGGGGTAAAGATACATGTGTTGTAGGTTCTATGGAATGCATGTCTCAAAGTCCATATTTTTTAAAAAACTTGAGA…	MLINNLRKVFIVGFARTPIGALGGCISHIPVHKLACATILKALERSQIEKEHIDCLIFGQSFSSGCGPVPLQKIAISTGMHINTKTYLVNNLCCSGLDSITIGYDLIRGGKDTCVVGSMECMSQSPYFLKNLRTEKYSLGNNILRDSIIHDGYDFMVNNKELKTNNSMELFCKKYNIPRVDLDEYVINSFKRTANAYSENLIQQELFPLVIQKNKNKMQVDKSVIDSDEIYKNYNIDKICNLNSESIITNYNIAPFADGACALVLMSEQKLKELDINPIAEIITYDNASVYPDEFPFSIPYSIEKCLKKINKSFIDYYEINELSALSVIFAMKKLNIDLSNININGGALSLGHPTAVSGSRIVMSLITVLKNYDMKLGCASINNYLGSSTSIIVENAY	398	0	null	no	GO_0003824, GO_0016747	GO_0003985	GO_0003824,GO_0016747,GO_0003985	0	0	0	0	0	0	0	0	0	0	0	0	0	0	0	0	0	0	0	0	0	0	0	0	0	0	0	0	0	0	0	0	0	0	0	0	0
1421	PF3D7_0627800	acetyl-CoA synthetase, putative	ACS	ATGAATAATTTGAAGAGTTATGGAAGTCTATCAAAAGTCGACTCTGTTCAAATCAACGGTATGGATATAGATACAAATATTTTTCTTAATATGAATTCTTACCCTACCAAGGAAATATATGATGATGAGAATAATAAGAATGATGGAAATCATAACATAAAAAATTTCCAAGCATATAAAGCAATGTATGAAGAGAGTATAAATAATCCAGAAGCTTTTTGGGGAAATTTAGCAAAGAATAATTTAATATGGTATAAATTATTTACTAAAGTATTTTTAGGTAATTTTAAAAAAGGAAATATAAATTGGTTTGTTAATGGGAAAATTAATGCTTGTGAAAATTGTGTTGATAGATGGGTTGAAAAAGATCCTAATAAAATTGCACTTATATGGGAACAA…	MNNLKSYGSLSKVDSVQINGMDIDTNIFLNMNSYPTKEIYDDENNKNDGNHNIKNFQAYKAMYEESINNPEAFWGNLAKNNLIWYKLFTKVFLGNFKKGNINWFVNGKINACENCVDRWVEKDPNKIALIWEQDCPDQYKKITYQKLLEKTCKVANLLKLIGVKKQDTVTIYLPMIPELIYSMLACVRIGAIHNVVFAGYSAASLSDRIIDSRSTVLITSDFGLRGGKLTKLKQIADVAMDMCGMIQTCIVFKNKTKMKDKNIQIKTPMENPIYNFTSFDSNSAQNFTINNSNDFIQIKSTHSHQSDHQNDFSLQQEDNNYTKNSNMSYTTSMYYHDNNLNHINTNKNNDHYNNNLNNKNYLNNNINDQSPMYVHTMNHNDNNDDNNNNNNNNNVDDDN…	997	0	null	no	GO_0003824	GO_0003987	GO_0003824,GO_0003987	0	0	0	0	0	0	0	0	0	0	0	0	0	0	0	0	0	0	0	0	0	0	0	0	0	0	0	0	0	0	0	0	0	0	0	0	0
4952	PF3D7_1437700	succinyl-CoA ligase, putative	null	ATGATTAGTAAAAGAACAAATTCTACCTTTCTTATAATAAAAAATTATTATAACGTATGGGTGGGATACAACAAGAATGTACAACATAATTCTTATTTTAAAAATAGTTTGGATTATATTTTCAAACCGAGAAGTATTGGAATTATTGGCGCCACTGAAAGAAAAGGTTCTGTTGGGAATTCTATTGTAGATAACCTAATAAAAGGAGAATCAAATTATAAGTTATATTTTGTAAATTCTAAAGGTAGTAAGATTTATAATAGACAGAGTTATAAAAGTTTAAAAGATATAAAAGAGGATAGTATCGATTTAGCTGTTATAGCAGTACCCCGAAATAATGTTGTAAATGTTATGCATGAATTAAAAATTAAAAATGTTCGTGGTGTTGTTATAATAACA…	MISKRTNSTFLIIKNYYNVWVGYNKNVQHNSYFKNSLDYIFKPRSIGIIGATERKGSVGNSIVDNLIKGESNYKLYFVNSKGSKIYNRQSYKSLKDIKEDSIDLAVIAVPRNNVVNVMHELKIKNVRGVVIITAGFKETGAEGLRLENEIINIGKTNNMRIIGPNCLGIIHSYHNMNASFASSDILKGHFSLLSQSGAICSAALDLSLQHNIGFSHFISVGSMCDVQFYELVEYLFYDVNTKYILLYVESIGDMNRFVAVCKKVCLYKPIILLKSGKTAKAAEAAISHTGSMVGNYEIFYATMKKLGVLVVDNFEELFNMCKVLNSSKYPETNEVCVVTNAGGPGVLLVDNIIKNDGVLSNLNDKLKNNLNSFLPDSWSKANPIDILGDASPVLYKKTI…	973	0	null	no	GO_0048037	GO_0003987	GO_0048037,GO_0003987	0	0	0	0	0	0	0	0	0	0	0	0	0	0	0	0	0	0	0	0	0	0	0	0	0	0	0	0	0	0	0	0	0	0	0	0	0
5269	PF3D7_1469600	biotin carboxylase subunit of acetyl CoA carboxylase, putative	ACC	ATGATTAATTTTTTTTTATCATTATTATTGTTTGTTCTATTTTTTGAAAATCTTGTAGTGTCTATAAAATATAGAAATATTCATTATATACACATGCCTAACAATGCTCATAATAAAAACTTTAATGAAAAAGAAAACAGAGAAATATATCATAATGTAAATATATCAGGAGGTAATACAATATATGAAGAACCTAAAAATAAGTATATTACTTTGTTTTTATCTAATGGAAAAAAAATCCTACATTCCATTTTTCGAAATAATAATAATAATAATATAACCATATGTAATGAAAATACGGGGAAAAATTCAAACATCAACTTGAAAAATAATTCTGAGAACAATACTAAGAGCAATTCTAAGAATTATTCTAGGGGTTCTTCATCGTGCTTAAATATA…	MINFFLSLLLFVLFFENLVVSIKYRNIHYIHMPNNAHNKNFNEKENREIYHNVNISGGNTIYEEPKNKYITLFLSNGKKILHSIFRNNNNNNITICNENTGKNSNINLKNNSENNTKSNSKNYSRGSSSCLNIQNVSNTYYDKRRIKKDIMNKKVEENLIHDENENNIINDKICCDEKQDLDKEIHVDEQNEKKSNSTLNNESFISILSNDNSEKKKDMEESNNYSNNFYLNSLEENIIYPTQHVDCDFNGKWKSHVDDILENDSYYSNMNDNSNKSCISDYELLKTSILLNNTKDDFPLYENSRKNILTTSGKINKNKNLKERKKKNLNRLFYTLKLTNNFSFKNSKNRRKYTNSYNSGSSTHSRYVMDNKEYIIYHNNNNNNNNNYNSYSNNCNNMY…	3367	0	HMM: MINFFLSLLLFVLFFENLVVSI, NN: MINFFLSLLLFVLFFENLVVSI	yes	GO_0005524, GO_0004075, GO_0003824, GO_0016874, GO_0046872	GO_0003989, GO_0009374, GO_0004075	GO_0005524,GO_0004075,GO_0003824,GO_0016874,GO_0046872,GO_0003989,GO_0009374,GO_0004075	0	0	0	0	0	0	0	0	0	0	0	0	0	0	0	0	0	0	0	0	0	0	0	0	0	0	0	0	0	0	0	0	0	0	0	0	0
2761	PF3D7_1029600	adenosine deaminase	ADA	ATGAATTGTAAGAATATGGATACTTCATATGAGATTATTAATTATTTAACAAAGGATGAGCTTGATATAGATTTATCATGTATGGATAAGAAGGAAAGATATAAAATATGGAAACGACTTCCCAAATGCGAATTACATTGTCATTTAGATGTATGTTTTTCTGTTGATTTTTTTTTGAATGTTATTCGTAAATATAATATACAACCAAATATGAGTGATGAAGAAATTATCGATTATTATTTATTTTCCAAACCTGGTAAATCATTAGATGAATTTGTTGAAAAAGCTTTAAGGTTAACCGATATATATATTGATTATACTGTTGTTGAAGATTTAGCAAAACATGCTGTATTTAACAAATATAAAGAAGGTGTTGTTTTAATGGAGTTTCGTTATTCT…	MNCKNMDTSYEIINYLTKDELDIDLSCMDKKERYKIWKRLPKCELHCHLDVCFSVDFFLNVIRKYNIQPNMSDEEIIDYYLFSKPGKSLDEFVEKALRLTDIYIDYTVVEDLAKHAVFNKYKEGVVLMEFRYSPSFMSFKHNLDKDLIHEAIVKGLNEAVALLEYKIQVGLLCTGDGGLSHERMKEAAEFCIKHKKDFVGYDHAGHEVDLKPFKDIFDNIREEGISLSVHAGEDVSIPNLNSLYTAINLLHVKRIGHGIRVSESQELIDLVKEKDILLEVCPISNVLLNNVKSMDTHPIRMLYDAGVKVSVNSDDPGMFLTNITDNYEELYTHLNFTLADFMKMNLWAVQKSFVDPDIKNKIISKYF	367	0	null	no	GO_0019239	GO_0004000	GO_0019239,GO_0004000	0	0	0	0	0	0	0	0	0	0	0	0	0	0	0	0	0	0	0	0	0	0	0	0	0	0	0	0	0	0	0	0	0	0	0	0	0
1187	PF3D7_0604600	DNA helicase, putative	null	ATGAAAAGTAAATATTTTTCGAAAGGCAAAAAAGCAAGTAAAAAAAACAATAACAATAATAATAATAATTACAACACTTTAGAATACAACAACCCTGTATCGACTAGCCTATATATTTCCACAATATTAAACAAACATGAAAAATTAATTAATAAAAAAAACAAAAATAAAATTAAACTCTACCATCGTAATTATTATAATGATGATGAAGGGACGCCGTTTAAGAGAGAAGGACAAATAAAATTATTAGATGATATTATAGCAAGAGATAATAAAAAAGAGAAAAAAAATGAAATTATTAATATAGAAAGTTATAGTAATGATCAGCTTAAAAATGATAATATAAATAATAAACGTATTGTAGATATAGATGTCGGTAGTACTTATGTTGATGGGAAA…	MKSKYFSKGKKASKKNNNNNNNNYNTLEYNNPVSTSLYISTILNKHEKLINKKNKNKIKLYHRNYYNDDEGTPFKREGQIKLLDDIIARDNKKEKKNEIINIESYSNDQLKNDNINNKRIVDIDVGSTYVDGKHFIDISLEHIRRNYHIFHNKNENYVKEEKQNVSYDNKDDFKITRKKLHLLKEEDLNFKYEQIISVNKKFDNIIKNLKLSDKELVKYIICKKCTNLTILKKGKYGTFFFCKSCNKNVSKKYIDNYIFNEQENTFYKDKNKISFEIEKKNSYRIHTFGNIQYAHATNQIINEIIKEIISDIIVIKKNKFKYKNIIKYISKINMPYPMNTCNYYPYGFAYKRKKNKKNIQPNKDHNEQDKTYQRIEAYKIYKGQEIHKVYDTNNKYYKK…	1712	0	null	no	GO_0005524, GO_0003677, GO_0004519, GO_0003676	GO_0004003	GO_0005524,GO_0003677,GO_0004519,GO_0003676,GO_0004003	0	0	0	0	0	0	0	0	0	0	0	0	0	0	0	0	0	0	0	0	0	0	0	0	0	0	0	0	0	0	0	0	0	0	0	0	0
4494	PF3D7_1362200	RuvB-like helicase 3	RUVB3	ATGAAGCTCGAAGAAGTGAAAGATATTCAAAAAATAGAAAGAATTGGAGCACATTCCCATATTCGAGGGTTAGGGTTAAATGATTGTTTAGATGCTAGGTATTGTTCTGAAGGTATGATCGGGCAAATGAGTGCTCGTAAGGCTGCTGGTATTGTCTTGAGAATGATTAAAGAAGGAAGAATAAGTGGAAGAGCTATTTTATTAGCTGGTCAACCAGGTACAGGGAAAACAGCCATTGCTATGGGTATTGCAAAAGCTTTAGGTGAAGATACTCCCTTTACTCATATTTCGGGTTCGGAAGTTTATTCTTTAGAAATGAGCAAAACAGAAGCATTGACACAAGCTTTTAGAAGATCTATTGGTGTAAGAGTAAAAGAAGAATCAGAAGTAATAGAAGGA…	MKLEEVKDIQKIERIGAHSHIRGLGLNDCLDARYCSEGMIGQMSARKAAGIVLRMIKEGRISGRAILLAGQPGTGKTAIAMGIAKALGEDTPFTHISGSEVYSLEMSKTEALTQAFRRSIGVRVKEESEVIEGEVVEIEIEKFNERDINNKNKKLGKMILKTTEMETLYDLGSKMIEALQKENITAGDVICIDKGTGKITKIGKSFARSKDYDAMDPNTLFVQCPEGELQKRKEVVHTVTLHDIDAINSRTQGFLALFSGDTGEIKNEIREHIDMKINEWQEDEKAEIVPGVLFIDEVHMLDIECFSYLNRALESEQSPIVIMATNRGITHIRGTDYKAPHGIPLDLLDRTLIIPTYPYKHQDILKILEQRAEEEDVDIDEYAKELLCKIASESSLRYA…	483	0	null	no	GO_0005524, GO_0003678	GO_0004003, GO_0016887, GO_0005515	GO_0005524,GO_0003678,GO_0004003,GO_0016887,GO_0005515	0	0	0	0	0	0	0	0	0	0	0	0	0	0	0	0	0	0	0	0	0	0	0	0	0	0	0	0	0	0	0	0	0	0	0	0	0
318	PF3D7_0218400	ATP-dependent RNA helicase DDX47, putative	DDX47	ATGAAATACAAAAATTATAACACGGCCACAATACTAGAAAACTTTGATAAGAAATTAAATAAGAATTATAAAGTTTTTAATAATGAGGAAATTAAAAAAATGGATGAGGAGTATGAGCATAAGATTAAGAAGAAGGAGCAATTAAAATTACAAAAGAAACAAATAAAAAAACAGGAACATAAAAATGAAAAGAAAAAAAAAAATAAAAATCTAAATAAAAAACACAATCAAAATAATACTAATAATAGTGATAATAGTTTCCATAATAGTGATAACAATATTAATCAAAATGGTAATTATACAAATAATAGTGATTATAATATCATTAATAATAATCATGATAATATTAATTTTATTCATGGTAATAAAAATAAAAACCATGATAATAGTTTTCACAAT…	MKYKNYNTATILENFDKKLNKNYKVFNNEEIKKMDEEYEHKIKKKEQLKLQKKQIKKQEHKNEKKKKNKNLNKKHNQNNTNNSDNSFHNSDNNINQNGNYTNNSDYNIINNNHDNINFIHGNKNKNHDNSFHNNDDVKNGEVKNLVTNEEREKQNVTFEDLNICEEILESIKELGWKKPTEIQREILPHAFLKKDIIGLSETGSGKTACFIIPILQDLKVNKQSFYALVISPTRELCIQISQNFQALGMNLLINICTIYGGVDIVTQSLNLAKKPNVIVSTPGRILDHLNNTKGFNLKNLKYLVFDEADKLLSQDFESSINKLLLILPPNRITFLFSATMTKNVAKLKKACLKNPVKVEVSNKYSTVSTLIETYIFLPLKYKYTYLSSLCFHYQTRNII…	562	0	null	no	GO_0005524, GO_0003676	GO_0004004	GO_0005524,GO_0003676,GO_0004004	0	0	0	0	0	0	0	0	0	0	0	0	0	0	0	0	0	0	0	0	0	0	0	0	0	0	0	0	0	0	0	0	0	0	0	0	0
641	PF3D7_0405000	ATP-dependent RNA helicase DDX51, putative	DDX51	ATGAAAAGGTCCTTTTTTATAAATCACCTGGAGAGGTTTGTGAATGATGAGATGTCGAAGAAGGAAAATTTTGATGATCTAAAAATAGTCGATATTGCTGAAAAAAAGAAGCATATGATTTGTTGTGATAATATAAATATTGATATAAATGATAACAATAATGATAACAATAATGATAACATATGTGATGATATTATGAAGAAAGAAATTAAGAAAGAGAAAAAAAGGAAGAAAAAGAAAATTGAACAAATCCGGAATACGTTAAGTTCACATTGTCGAATTGTGGAAATAAATGATGATGAAGAGATTAGTATATTAGATTGGAATAATATAAAGAGTACAAAAATAAATGAATATATAATTAATAGTTTAATTAATAAATTTCACTTTAATAATTTC…	MKRSFFINHLERFVNDEMSKKENFDDLKIVDIAEKKKHMICCDNINIDINDNNNDNNNDNICDDIMKKEIKKEKKRKKKKIEQIRNTLSSHCRIVEINDDEEISILDWNNIKSTKINEYIINSLINKFHFNNFLACQSNVLEYLLLYKYGSNCIKNGDIYIEVPTGLGKTLCYIISIIDYFLYNNENTLYCLILTATDELVNQIINVINIFELRNLKCMNIDMNNFHSNLYFDETINHKKFLSDCNILVTTTKKFEGLFYSNEDIFMNLRFLIIDEVDKIVAYTQCNICSIVNSLTNLVRKHQNNCANIYKPKYFLQKILVSATLCKVSDNLMSLDLYRPIFFYYMLNYKRNEEFYFFTKNKYTKMYTLIKLLLDDIPNKDMLSMLIFCGDEDSSHTLY…	567	0	null	no	GO_0005524, GO_0003676	GO_0004004	GO_0005524,GO_0003676,GO_0004004	0	0	0	0	0	0	0	0	0	0	0	0	0	0	0	0	0	0	0	0	0	0	0	0	0	0	0	0	0	0	0	0	0	0	0	0	0
703	PF3D7_0411400	DEAD box ATP-dependent RNA helicase, putative	null	ATGTTATGTGCTTCTAAAATAAAACATGATGAGAAATCATATAGAAATATATTTTCGTACATTTTTCAAAAAATAAAAAGAAAAAGGAAACAAAACAATTATGTATTTACAAAAAATATAATAAATGATGTTTTATGTATTCGTGATAGTATCAAAAAAGATGAGATAGAAGAAGAAGAAAAAAAAAAAAAAATTATTGAAGAAAAGGAAGGAACTTTTTTAATTAATTTTGTAAATGAAAAGAATAAAATAATTTATGATAATATAAACGATCTAAATAAATATTGTATAGACAAATTTAAAAAATACAAATGTGATGTCTATATATCTACGTCATCTAATAGAGAATATGTACCATATTATATATATGATTTTTTTATAAACTATCCATTATTAAAA…	MLCASKIKHDEKSYRNIFSYIFQKIKRKRKQNNYVFTKNIINDVLCIRDSIKKDEIEEEEKKKKIIEEKEGTFLINFVNEKNKIIYDNINDLNKYCIDKFKKYKCDVYISTSSNREYVPYYIYDFFINYPLLKWYITNKTTHKISDNYMNSNRCISSNYHMCRKKKKKYNNFRECKRVYYIQKNIKRYSMNNLFDNKNNICKYLILNKKRLEANNLFNLIKYYNVHKKELFLSSLEHKKLDNINFDSYIKLSLIKNFNVKYLTTVQYVTFPLFLKNYDLLISSFKSSGKTLAYMNCLVHKIIIQINNLRKKTNIKDNYVLGLIICPNVILVEQSYGILKKLIMYHPYNIICYYMHGKKYINIQDEIKNLKKKRPHIIITTPGYLMNFIKYFKNFSQIFF…	1304	0	null	no	GO_0005524, GO_0003676	GO_0004004	GO_0005524,GO_0003676,GO_0004004	0	0	0	0	0	0	0	0	0	0	0	0	0	0	0	0	0	0	0	0	0	0	0	0	0	0	0	0	0	0	0	0	0	0	0	0	0
803	PF3D7_0422500	pre-mRNA-splicing helicase BRR2, putative	BRR2	ATGGCTGAGGAATATGAGAAATTTAAGCGATTTGAATATCGGATGAACTCCAACCTTGTTTTACAAAGGGAAGGTCCAATATCGAACACCAAAGAACCCACCGGTGAAAGCGAGAGTTTAGTAGGAAGATTAAAATATAAGATGGGTGATAAGGTTGAATATAGTAATAAGAATAAGAAGAATATTATGTTAGTACAAGATAATAAAGAAATGGCTATAAATAGAAATAAAAGAAAAGATATTTTTGATGATGATAAATATAATAGACGATCTAATAAGAAAATTCGTCATAAAGAAAAGAGTGTATTAAATGTAAACATTGAAGATATTTTTTTATATAAGCCTACAACAAAGTATACAGAAGAGATATATACGAAACTTATGAGTAAGATAAGATTT…	MAEEYEKFKRFEYRMNSNLVLQREGPISNTKEPTGESESLVGRLKYKMGDKVEYSNKNKKNIMLVQDNKEMAINRNKRKDIFDDDKYNRRSNKKIRHKEKSVLNVNIEDIFLYKPTTKYTEEIYTKLMSKIRFLLGDNTGDIINSACNEILYILKNEELNNEEKKKQVESELEIYINDDIFIEINNLSKEIYDFNKQEEGEYVENDEGVAVIFEEDDDYFNIGRNITRGYINDHETMELQELSDDNEEEDISEDDDGDDEEEDDEEADAEEADDEDGDDEDGDDEEGDDEYGENEDGDDNNNNNNNNNNSVRRKKKKKGNQINHLKSYDKKNKKFENYLSLKNTNKNLYYDEENKNVQDNDELNINVIDSHWLQRELNKIFPDPSLCLDKEKEVLNVLN…	2874	0	null	no	GO_0005524, GO_0003676	GO_0004004	GO_0005524,GO_0003676,GO_0004004	0	0	0	0	0	0	0	0	0	0	0	0	0	0	0	0	0	0	0	0	0	0	0	0	0	0	0	0	0	0	0	0	0	0	0	0	0
2680	PF3D7_1021500	ATP-dependent RNA helicase ROK1, putative	ROK1	ATGGATGTTATTAAACAACTGACTTACGGTTTAAATTTGAAAAGTTCTTTGAAAAATGGTGATTTGATGAGTTTGAAAGAAGAAAATTTAAAACCTTTAAAAAATATATTAAATATAAAAAAAGAAAACGAATCAAATGAAGATGAAAAAACGAAAAAAATTGTGCAAAGTTGTGAGGGAATAAAATATTCTCAATTTTATGATAACTCAAATTTGATTAATAGTTATATGAAAGTTAATGAAATAAATGTTGAGTATGAAAATATAAATAGGAATATTGTTCCCATTCGCTCTTTTCATGATATTATAGAATATTTAAAAATAATAAATAATGAAAGGGATGATGAAAAAGAAGATGAGAAAATGAATAATATAAATAAATTAAATCATAACATGAAA…	MDVIKQLTYGLNLKSSLKNGDLMSLKEENLKPLKNILNIKKENESNEDEKTKKIVQSCEGIKYSQFYDNSNLINSYMKVNEINVEYENINRNIVPIRSFHDIIEYLKIINNERDDEKEDEKMNNINKLNHNMKPYNSDSDNQNNKEKDMEKNKIDTLTNEQKEIISNKEKEKRKNDKSNNKTYIINKEYEKLLSTIKNTLYFKKPTCIQKMCIPSILNDYNTICISQTGSGKTCSFLIPLLIKLNNIYLEKHEREKKKNNNNNNNNNNNNNNNNNNKNNNNNNNLDNISDKNNLNENLIFIKSLIIVPTNELACQIYEQALLLFESYKHINIIHLNKLNDIIENNVIDVCVCTPMILLNMIHEKGEKAEKIEGKKKKVSLKKCFFIVFDEVDKLFEIKF…	680	0	null	no	GO_0005524, GO_0003676	GO_0004004	GO_0005524,GO_0003676,GO_0004004	0	0	0	0	0	0	0	0	0	0	0	0	0	0	0	0	0	0	0	0	0	0	0	0	0	0	0	0	0	0	0	0	0	0	0	0	0
3759	PF3D7_1241800	ATP-dependent RNA helicase DBP9, putative	DBP9	ATGAATGATGCACAAATAAAGGATATGATGAATGATGAAGAAGAAAAAGAAGAAATAGAAATTAAGGAAAACATAAATGATAAGATAAATGAAATTGATGATAATGATGATAATGATGATGGTGATGATGATGGTGATGATGATGATGAAGATGAAGATGAAGATAGTGATGATAATGATGATGAAGATAATGATGAAGATGAAGATAATGATGATAATGATGATAATGACGATAGTGATAATAATGATGATGACCACAACGATGTTAAAAAATCTAGTAAGAATAAAAAAAAGAATAACGAGGAAATGTTCGACAGAAGTAACCATTTTGATAATTTTGATAACATTATGTTAGATGTGAGATTAAGAAAAGCTTTATTATATTTATTCAAATATCAA…	MNDAQIKDMMNDEEEKEEIEIKENINDKINEIDDNDDNDDGDDDGDDDDEDEDEDSDDNDDEDNDEDEDNDDNDDNDDSDNNDDDHNDVKKSSKNKKKNNEEMFDRSNHFDNFDNIMLDVRLRKALLYLFKYQHPTIIQKMSICKILNGHDVIISSKTGSGKTMAYLIPVVHNLIKFNLNEKDHLKFFYKCIIICPTEELCLQIYDVTKKLCTYLKDIITVNHNVNNTFYEHPTILISTPKDLCTHIIEKKKKNNLDILMNLKILILDEADVLHTQEFQSYLKTLTSYLPKKFNKKYQIVMASATLKRNILEKTKLFLHNPIYVSHEQKNESSFEKKKNKTNNTNSVIMKREEAGKNNIHDEGNEGKTKYQKFTGKAFYYVYKEELIKYIYLYNLIKIK…	878	0	null	no	GO_0005524, GO_0003676	GO_0004004	GO_0005524,GO_0003676,GO_0004004	0	0	0	0	0	0	0	0	0	0	0	0	0	0	0	0	0	0	0	0	0	0	0	0	0	0	0	0	0	0	0	0	0	0	0	0	0
3855	PF3D7_1251500	ATP-dependent RNA helicase DRS1, putative	DRS1	ATGTTTAAAAAAAATATGAAGAAAAAAATATGCCAAGATAAAAAAATGAGTGATGTAGATAATGTGAGTGAACCAGAAAGTTATGATAAAGATATAAATGGTAAGGATAATACGAATAGAATTAAAAATGTTAGTGATAGAGATGAAGATGATGTCGAAGAAATGAAGGAAGGTACAAGCGAAAGAACAAGTATAAGTAGAAATAATAAAAATAGTGAGAATCCCAAGAAGAATAATAACAATATTATTGATATGAATTGCCTGTGGAGTGATTTATACATATCGAGACCTTTTTTAAAGGTTTTATATGAACAAAAATTTAGTAATCCTACATATATTCAGAGAGATGTGATTCCATTAGCCTTAGAGGGTAAAAGTATTTTAGCTAACTCAGAAACG…	MFKKNMKKKICQDKKMSDVDNVSEPESYDKDINGKDNTNRIKNVSDRDEDDVEEMKEGTSERTSISRNNKNSENPKKNNNNIIDMNCLWSDLYISRPFLKVLYEQKFSNPTYIQRDVIPLALEGKSILANSETGSGKTLAFVLPILERLLQSVNIKMRRNNMKGSYNITKALILLPTRELSLQCYDVIRSLTKYVTITYSLFCGGIDIKQQEYEFKKRNDIFVCTPGRILDLLLNSSSDFINYLEIVVFDEADKLLELGFKEECLKILDVCKFKKQILFFSATLTSDIKQLANFSLKNPVFIQSGMSFDKNVDGKNTYNAYNTCNTYNDNDNNNIVVNNIISNSFLKISNKASFKISENLKQEFVNIIQEKYRKASLLYLCNNIYKNHCIIFFKTKRET…	705	0	null	no	GO_0005524, GO_0003676	GO_0004004	GO_0005524,GO_0003676,GO_0004004	0	0	0	0	0	0	0	0	0	0	0	0	0	0	0	0	0	0	0	0	0	0	0	0	0	0	0	0	0	0	0	0	0	0	0	0	0
3956	PF3D7_1307300	ATP-dependent RNA helicase DBP6, putative	DBP6	ATGAAAAACTTTTTTATACTTCACTTGAGGAATAATTATTCCATCTTTTTGAATAAGCCTCTACAAGTATTTACATTAAATGTTAAATTAAATAGTCATGTTAAAGTAAACTATAAACATGAGCTATTAACTTATGAGTTCAGAAAAATAACATATGTTAAAAAAAAAAAAAAAAAAAGTTATCATAATTGTGATGGAAGATATATTACTACATTAAACAAAACGATTAATATTAATGAAAAATACAGTAAGCTTAAAAACGATGGTTTATTAAATTCTACTCCAGACAATCATATAAAAGATAACATTATTAAAGAAGACTTATTATATAGAAAGAATAACGAAAAAGAAAATGAAGAGGTAATAAAATCAAATATAGATGAAAATAAAAATGTACAT…	MKNFFILHLRNNYSIFLNKPLQVFTLNVKLNSHVKVNYKHELLTYEFRKITYVKKKKKKSYHNCDGRYITTLNKTININEKYSKLKNDGLLNSTPDNHIKDNIIKEDLLYRKNNEKENEEVIKSNIDENKNVHMNDQNEQNKHCYNKLLIESCCHIDKDVKKSLLEIFQYKEFTDVQRIVYDNIIKEKKQNDLLIQAKTGTGKTIAYLLLSINDIIKNKILSVHTLIIVPTRELANQIYNECKLLLTYKHNINVLTLTGGIKRRDDQLNIRRIKPDIIICTVGRLLDHFESTYLFNTLFENLKMLIIDEADQLLSTGYENDIHRLLTYLPSNRRNILLSATLGYNLDEIRKKMCKSDYIYLNCVKDISKHTSDQLIQYVLFHKAIDTTIILYNLLIEHM…	630	0	null	no	GO_0005524, GO_0003676	GO_0004004	GO_0005524,GO_0003676,GO_0004004	0	0	0	0	0	0	0	0	0	0	0	0	0	0	0	0	0	0	0	0	0	0	0	0	0	0	0	0	0	0	0	0	0	0	0	0	0
4211	PF3D7_1332700	ATP-dependent RNA helicase DBP8, putative	DBP8	ATGATAATATGTGCGAGGACAAAGAAACCCTCGCTAAGGTTTTGCAAACTATTTAGACGTTACTACATAAGAAAATTTTTAAAAAATAAAATTAAAGAGGATCTTATAAAAAAGAAAAGATATAAATATAAAGAACGTGAAAATGTAGATGGCACCCGCTTATATAATGAGGAACAGATAAATAGTTACAGTGACCAAAGTAATAATATAACGTTTGAAGAATTAGGTGTTGAAGATTGGTTAATAAAAATTAGTAAGAGTGTTCATATATTATATCCAACCAAAATCCAACAATTATGTTTACCTTTAATTATACAAGGGAAAAATGTAATTGGTTCTTCAGAAACAGGTAGTGGGAAAACTATATGTTATTGTTGGAGTATATTACAAGAATTAAAT…	MIICARTKKPSLRFCKLFRRYYIRKFLKNKIKEDLIKKKRYKYKERENVDGTRLYNEEQINSYSDQSNNITFEELGVEDWLIKISKSVHILYPTKIQQLCLPLIIQGKNVIGSSETGSGKTICYCWSILQELNKNVYGIFSLILLPTRELVFQIIEQFHLYGSKIGVMILSCIGGFSLIEQRKSVMTKPHIIVGTPGRISDILESSIDIQNCFKRLRFLVLDEADLLLQKCFEDKLQNILNNLPKNYANERKTLFFSSTITNSLQLLIDTFPYNNLILVNVNKKQKPPKNLDQRYIYVEEIAHITYLIYILKNKVNNLSGIIFTANSYKCELVYTVLNMLGIDNVDAMHSSKDQKNRFATLAKFKNGLCKILVATDIISRGIDIPKISFVINFDFPNDT…	490	0	null	no	GO_0005524, GO_0003676	GO_0004004	GO_0005524,GO_0003676,GO_0004004	0	0	0	0	0	0	0	0	0	0	0	0	0	0	0	0	0	0	0	0	0	0	0	0	0	0	0	0	0	0	0	0	0	0	0	0	0
4772	PF3D7_1418900	ATP-dependent RNA helicase DBP4, putative	DBP4	ATGATAAATAATAAAGGAAACGTTGGTAAAGGTAAAAGGATTTTCAATAAAAATTATGGAAGTATATCAAAAAAAAAGAAGAAGAGAAATGATAAATTAAAAAAGGATGTTAGTAATAATAAAGATGAAAGATTGGAGTTACAAAAAAGAATTGATGAGACTTTAGGTTTGATAGTAGAAGAAAATAAAAGAAAACAATATGAAGAGAAGATTAATAATGATTTAGAAAAAAATGAGAATGTTAAGAATTTTTTAAAAAGTGATAAGACAAATAATAATACATATGATGAAGATGAATTAAAAAATAATAAGAATAAAAAATATAAAAATAATTTAACTATTATTGATAAAAATGTATTGACATCTGCTGAATTTAAAACATTACCAATTAGTAAAAGA…	MINNKGNVGKGKRIFNKNYGSISKKKKKRNDKLKKDVSNNKDERLELQKRIDETLGLIVEENKRKQYEEKINNDLEKNENVKNFLKSDKTNNNTYDEDELKNNKNKKYKNNLTIIDKNVLTSAEFKTLPISKRTLRALNENNFIYMTNIQYVSLPIVLLNKHIYAQAQTGTGKTLCFCIPLIEKMYRNSIDNYNKILGGIIITPTRELVFQIFEVLNMLNKYHKLNICCAIGGKNEEKEKSIFSYANIIVCTTGRLLYHLENNYYCNLDYLSTLIIDEIDKLIDKSFYDNLKNILLYKPKENCQICLFSATICKFLNVILNTFHIKDYEYVSINDNDKYIESNNVKQIYIECDIYEKINYLYTFLFSKKNKKIIVFFSTCKQVRFMYEVFKKIKVGVMK…	876	0	null	no	GO_0005524, GO_0003676	GO_0004004	GO_0005524,GO_0003676,GO_0004004	0	0	0	0	0	0	0	0	0	0	0	0	0	0	0	0	0	0	0	0	0	0	0	0	0	0	0	0	0	0	0	0	0	0	0	0	0
4774	PF3D7_1419100	ATP-dependent rRNA helicase SPB4, putative	SPB4	ATGAATGAAGAGGAAAAAAAGAAATATCCATTTGATGAACTTAAATTAGATGAATCCATAATATTTTCACTATATATTCAGAAATATTTTTATTGTGCTAATATTCAAAAAAAAACCATACCTCCTTTAATAAAAAAAGAAAATGTTTTATTACATTCACAAACAGGGAGTGGTAAAACATTATGTTTTGTCATACCTATATTACAATATTTAATACATCATAGAAACAAATTATGTCCAAATGATGAGAAGTTTATAAAAAGGAATGACTTATTCAACAAGAAAAATGTTAATGACACAGTTTCATATAATAAAGATCAAATTGAACGTATTTATGAAACTGTTGAAAATATAAATATAGAAAAAAAAAATGCATATCGAGACGTAAATGTAAATATA…	MNEEEKKKYPFDELKLDESIIFSLYIQKYFYCANIQKKTIPPLIKKENVLLHSQTGSGKTLCFVIPILQYLIHHRNKLCPNDEKFIKRNDLFNKKNVNDTVSYNKDQIERIYETVENINIEKKNAYRDVNVNIDIRNFLLYTHNMLRNTNEEDISKKVEINQNDNKVMTYKDKIISDDQVNIIKKDEINIQKNNNQEEIIRKNDLQNITFATTCNSNYQDDKQETNKEKHEQKIEEKYNEQNIQTNNQTKKPHNNNNNNNNNNSKKKTQKLLNIQAIIITPTRELCIQIYNLINKFLFFLRFYISHTLNNNMDNNVLTKENFFINCLLFRGAVKISEDIKIIENEILKNNRYQIIISTPGKLSSLLSEYNNKYFNTNELKYFVLDEGDKLLEDSYIRYM…	1041	0	null	no	GO_0005524, GO_0003676	GO_0004004	GO_0005524,GO_0003676,GO_0004004	0	0	0	0	0	0	0	0	0	0	0	0	0	0	0	0	0	0	0	0	0	0	0	0	0	0	0	0	0	0	0	0	0	0	0	0	0
4964	PF3D7_1439100	DEAD/DEAH box helicase, putative	null	ATGAAGGAAAGAATAAATGAAAAGTTTAAAATAAATTCATATCAAGATTATTCTGATAAAAATAATGAATGGAATATTGACGATGCAATTAATTATATAAAAAGAAATGCCTTTTTTAAAAAGTATAAAGATATTAACGATGTTAATGATATATGTGATATTAATGTAGATGATCATATTAATGATGATGACAAATTCTATCAGAATTTCGAGAATATCTTAATAGAAGAGAAAAAATATTTAAAAAAGTTGTTGAGAGAAAACCGATGGAATGATAATATATTAAAGGAATATGTGGATGGAAAAGTACTAGAGAATGAAGAAAATGAAGAATCTGGTTTAATGTATGTTTATAATACATGTTATAATATATTAAGCAGTAAAAATGAGATCACTGAT…	MKERINEKFKINSYQDYSDKNNEWNIDDAINYIKRNAFFKKYKDINDVNDICDINVDDHINDDDKFYQNFENILIEEKKYLKKLLRENRWNDNILKEYVDGKVLENEENEESGLMYVYNTCYNILSSKNEITDINNKDNSIINHSNYNEGYIIINKNNTMKKIYINEINELLIEIIYITLTRENLENSLVDLLGDRFLDFIIQIIKNKEQIEKDIKLLSKQIVIKENTLVSNFFITNKSSKKIKNQQILYKKENIEKIIDHFLYLLTDDSYNQMKKIYIPNDQDKLEEIHVPKNTIYSYTDNITKVKISRLENLQFHKKELVSVNVLPFWHKYIFDFEYFNYVQSKVFNSAFRSNKNLLVCAPTGCGKTNIALLVILQQIILFCEQNKIKLEKIVKSYL…	2472	0	null	no	GO_0005524, GO_0003676	GO_0004004	GO_0005524,GO_0003676,GO_0004004	0	0	0	0	0	0	0	0	0	0	0	0	0	0	0	0	0	0	0	0	0	0	0	0	0	0	0	0	0	0	0	0	0	0	0	0	0
2515	PF3D7_1005500	regulator of nonsense transcripts 1, putative	UPF1	ATGGATAAAACTTTCGATTATAATAATATTCATGTAGATAATTTTGACGAACTGTACGATTTTTGTATTTCTAAGGATACGAATAAAAAAAAAATAAAAGAAGAAAACTATTTTTCAGAAGATACACAACAAAAATTTAATGACGATAAGGATACATGTAATAAAGAGGTGTTAAAAAAAAATACAAATATAAAACCTACAAAAAAACATGGGAAAAATAAAAAATCGGAATATTCTCCATGTAAAATAATAGAGGAAAAGAGGTTAGATATGTTAAATGAAAGTTTGGAAGATACGGAATCATATTATGATCGAAAAAAAAAAAATTCACATAAATACAAAGAAATAAATAACAGCAATAATAATAATAATAATAATAATAATAATAATGATGATAAC…	MDKTFDYNNIHVDNFDELYDFCISKDTNKKKIKEENYFSEDTQQKFNDDKDTCNKEVLKKNTNIKPTKKHGKNKKSEYSPCKIIEEKRLDMLNESLEDTESYYDRKKKNSHKYKEINNSNNNNNNNNNNNDDNNSKKHIDPHGNDCIHQGKHKNEHEQQYYSNKHMKNNSECLSDISSYTDIRSCNNVEDGIYDEYDLTNKMKYEKTNKYKNKNKNKNGYNNKYENKNNYYKNDYSKYYSNHKDDTHNELYEEGNNYRYKNKKSKDDLKYYRCRYCEIDSIDSVVQCNNCKRWFCNGSYGTCGSHIVTHLVRSKHKEIRLHKNSLLGETILECYNCACRNVFLLGFLPTSEEGVVVIICRDPCLSSYISLYEKHVGPFDEHKSKSLQDDMEKEILLEDH…	1579	0	null	no	GO_0005524, GO_0003677, GO_0004386, GO_0008270	GO_0004004	GO_0005524,GO_0003677,GO_0004386,GO_0008270,GO_0004004	0	0	0	0	0	0	0	0	0	0	0	0	0	0	0	0	0	0	0	0	0	0	0	0	0	0	0	0	0	0	0	0	0	0	0	0	0
2766	PF3D7_1030100	pre-mRNA-splicing factor ATP-dependent RNA helicase PRP22, putative	PRP22	ATGGATTGTTTAAGTAAAATAAATTTAATACGAAAAGTAAATGAAGAATTATATAACAGTATAGGAGTCGAGGATGATAACCTTTCCGAGTTTTTAATTTACTTATGTGAAAAATCTACATCCTTAGAAGAATTTTGTAAGGATGTTTTTGAAAATGGAGGGGTGATTGAACAAGCCGTTCTTAAATATATATATAATATGATTAAAAAGGATAATAAAAAAAAAAAAGATCATGATAATGAAGATGATGTAAATAGTAAAGAAAATATTTTTTTGCAGAACTTAAATTATAATGATAATAACTTAGAATATAAAAAAATAGAAATGAAAAATGAAAAAATGAAAAAATATCATTGCCTAACTTTAAAAAATGAAGATATAACTAATTTAGTAGATAGT…	MDCLSKINLIRKVNEELYNSIGVEDDNLSEFLIYLCEKSTSLEEFCKDVFENGGVIEQAVLKYIYNMIKKDNKKKKDHDNEDDVNSKENIFLQNLNYNDNNLEYKKIEMKNEKMKKYHCLTLKNEDITNLVDSDENDKKEKSIKGTKEKKESIEITSKQKKNSDINVTTRDLSDSSYQKKRRKKKNSSGGSSKNTESSFETKDIKKDNKYESGKKRKYDERYYDRHSKEHHHSNKHRHSKEHRHSKEHLHSKEHHHSNKHHHSNDHHHSNDHHHSKDHHHSNKHHHRRHISSSSDSSYYNNKKKKEKTHRDKKNEEDKSYDDYMALKLNNIFNGTINKITDFGLFVSFKTNEGYKEGLVHATDILPNRKRVVNMNEKFKRNMKVKVKVKGIFNQKISLN…	1290	0	null	no	GO_0005524, GO_0003723, GO_0004386, GO_0003676	GO_0004004	GO_0005524,GO_0003723,GO_0004386,GO_0003676,GO_0004004	0	0	0	0	0	0	0	0	0	0	0	0	0	0	0	0	0	0	0	0	0	0	0	0	0	0	0	0	0	0	0	0	0	0	0	0	0
1162	PF3D7_0602100	ATP-dependent RNA helicase, putative	null	ATGTCCAACAATATTGATGATTTATTTGACGTTTTTGAAGAAAATGAAATACCAGAAATTATTTCAATAAAAGATGAAGAACAACAACAAGAAAAAAAAAACCATATCATACAAAATGACAACGAAATTATAACTTCAACTAATAATAGTAAAAATGAAGACGAAGAAGAAAAAGAAGAAACTGAAAAAAATATAAATAAACAAAACAACAATATTAACAATATAGATAAAGATGATGTAAATAAAGATAATGTAGGAAATCATAAAAAGGAAAATCTATACAAAGATATAAATATTGAAAATTATAAAATTAATGTAGAATATTTAATTAAGAATAAAAAAGCCGAAGAAAATATAAAAAAACAAATACAAGAAGAAATATATAGTGATATACAAAAT…	MSNNIDDLFDVFEENEIPEIISIKDEEQQQEKKNHIIQNDNEIITSTNNSKNEDEEEKEETEKNINKQNNNINNIDKDDVNKDNVGNHKKENLYKDINIENYKINVEYLIKNKKAEENIKKQIQEEIYSDIQNFDKTNKNVNKIRKLSLQENNNINNNHINGKNINNNINEDNLTGETYPNDDSIPQENNKITNKLIVEETIIENSKTINNDDVLVLEEFGGDVNCIHKCVRPQSYVHNEIKEPLIPARTYKFELDTFQKKSIECLERNESVLVSAHTSAGKTVIAEYAIALGLRDKQRVIYTSPIKALSNQKYRDLGEEFKDVGLITGDISINPEASIIVMTTEILRSMLYRGSSLTKEVKWVIFDEIHYMRDRDRGVIWEETIILLPLMVRFIFLSA…	1350	0	null	no	GO_0005524, GO_0003723, GO_0016817, GO_0016818, GO_0003676	GO_0004004	GO_0005524,GO_0003723,GO_0016817,GO_0016818,GO_0003676,GO_0004004	0	0	0	0	0	0	0	0	0	0	0	0	0	0	0	0	0	0	0	0	0	0	0	0	0	0	0	0	0	0	0	0	0	0	0	0	0
2180	PF3D7_0909900	helicase SKI2W, putative	null	ATGGCATATAATATATATTCCAACTTGTCCGATTTTTGGACTAGTGATGATGATGAAGGGGACGAAGGATCAAATGAAGAAGAGGAAGAGAAGAGTGTATCAAATGATAAAGAAGAAAATAATAATTTAAAAAATGAAACCTATGGTTATGATATAGAAGATAGTTTTAATGAATATAATATTTATAAGAGAGAAGATATGAATATGATGTATAATGATGATAATTCATTTAATAAAACAATAGATGAAAGATTACATTTTAATATAAATGATATAATGAATGAATGTTCAAATGAAATATCAGAAAACTTTACCATAAATAATCTTTTAGAAAAGTATGATATAAATAATTTTATATATAATGATAATTTATTAAAATATTGTGAAACAGGTGTAGCC…	MAYNIYSNLSDFWTSDDDEGDEGSNEEEEEKSVSNDKEENNNLKNETYGYDIEDSFNEYNIYKREDMNMMYNDDNSFNKTIDERLHFNINDIMNECSNEISENFTINNLLEKYDINNFIYNDNLLKYCETGVAINDEKPNNEKLILNEDFEFNVKCSFNYVNPPSYGLKINRDVKNEVPQENIKNNNLEMKQVIYNKEEMLVEKKVLDDNENVDMEKIDHPNGKNIDNNKKYDDDDNNNKKYDDDNNNNNNDNNLNEAQILNNNIENTKIKYIRKKWVIEDNESDISNFNKNDLLLNYDFELDDFQKRSIKHLNNFKHVFVAAHTSAGKTLIAEHAIALSIKLQKKAIYTSPIKALSNQKYYEFKNIFKDVGIITGDVKMNVNANCIIMTTEILRNLLY…	1373	0	null	no	GO_0005524, GO_0003723, GO_0016818, GO_0003676	GO_0004004	GO_0005524,GO_0003723,GO_0016818,GO_0003676,GO_0004004	0	0	0	0	0	0	0	0	0	0	0	0	0	0	0	0	0	0	0	0	0	0	0	0	0	0	0	0	0	0	0	0	0	0	0	0	0
1966	PF3D7_0821300	ATP-dependent RNA helicase DHX36, putative	DHX36	ATGAGAGAATTACCCATATTGAAATACAAACATGAAATTAAAAAATTGATAAAAAAAAATAATTTAATCATAATAAAAGGAGAAACAGGTTGTGGAAAGACTACTCAAGTTCCCCAAATAATAAATGAAATATTTTTTGATAAAAAAGAGAAAAAATATGATAATATCAAACATAAAAATGATGAAAAAAAGAAAAGGAAAGAGAAAAAAAAAATGTTAATATCTCTTCCTAGAAGAGTAGCAACTATTACTGTTGCTGAAAGAGTTTCCAAAGAAATGAAAAGAGGTGATATAGGTAATTATGTTGGTTATACTATAAGATTTAAAAATGTATGTTCTGATAAAACTCGAATAAAATTTGTTACAGATGGTATATTAATTAGAGAAATCATGAATGAT…	MRELPILKYKHEIKKLIKKNNLIIIKGETGCGKTTQVPQIINEIFFDKKEKKYDNIKHKNDEKKKRKEKKKMLISLPRRVATITVAERVSKEMKRGDIGNYVGYTIRFKNVCSDKTRIKFVTDGILIREIMNDPLLKKYKFLILDEIHERSIRTDVLLGYTKILLQKRKKIKIILMSATFDINIFNQFFNNPPIITIPHKLHKITIYYPRRNIEDYILSVVSTILQIHFGNTSYSSEFENDDDHRENKPNELNELNKSNEQNELNESNEVNKEHDSYESNKTHDINEIDEQNNLQTDNISMNNINEDIKKTEDKSLGDILVFLPGQEEIEMVNIMLKEKLKIIYKGNLLNKLMKERNNYNNQNDFQNKINNKFNTDDHILNEICFHFGKTEIMPDKIYN…	867	0	null	no	GO_0005524, GO_0004386, GO_0003676	GO_0004004	GO_0005524,GO_0004386,GO_0003676,GO_0004004	0	0	0	0	0	0	0	0	0	0	0	0	0	0	0	0	0	0	0	0	0	0	0	0	0	0	0	0	0	0	0	0	0	0	0	0	0
3663	PF3D7_1231600	pre-mRNA-splicing factor ATP-dependent RNA helicase PRP2, putative	PRP2	ATGAATGAAAAAAGTGATTTACATAAGAGATCAATTGAATTTACCGATAATGATGAATCAAAAAAAAAAATAAAAACAGACGGAGAAGAAAATGATATAATGGAAAGTAAAGGAAAAGATTCTTATTCTTTATATTTAGAATATCAAAAAGGTAGGAATAAAAAATTAAAGAATAATGAAGAATACATTGAATATTTAAAAAAAGATGCTAGGAGAAAATATTTAAAAGAAAGAGAAAAAGAAAAATTAGATATAACGAAGAAATTATTAGATGATGAATTATTATATAGTACTGTAAAATTAGAAGGAAAAGATTTAAAAGAATTACAGTTTTCTAAAAAAATATATAATATAGCAAAAGAAAATATAAATCTAAGAGAAAAATTACAAGAAGAATCA…	MNEKSDLHKRSIEFTDNDESKKKIKTDGEENDIMESKGKDSYSLYLEYQKGRNKKLKNNEEYIEYLKKDARRKYLKEREKEKLDITKKLLDDELLYSTVKLEGKDLKELQFSKKIYNIAKENINLREKLQEESYYFQQDIDKNKKTQTYENDKVDKSLYNYDEQILNKGILKFGSAISKQNIQKQNNNEFVFDDDIITTNRKSIKRESFEEKKMNESPTKKKKKRKDDIESDNKCDKDEKYDKYGKFYKRDKHHKYDKHDKHDKYDKHDKHDKHDKHDKHDKHDKHDKNDKHDKHDKHDKHDKHNKKYHSKYKELNTSYDNNSPTDSTYKSEEESSSSGDKNHRNNKYDSDKIKHEKKKKKKSIMTDEERNVDSNKRSFEKKESELNENGLTDVVEFVH…	1168	0	null	no	GO_0005524, GO_0004386, GO_0003676	GO_0004004	GO_0005524,GO_0004386,GO_0003676,GO_0004004	0	0	0	0	0	0	0	0	0	0	0	0	0	0	0	0	0	0	0	0	0	0	0	0	0	0	0	0	0	0	0	0	0	0	0	0	0
4514	PF3D7_1364300	pre-mRNA-splicing factor ATP-dependent RNA helicase PRP16	PRP16	ATGATTGCTAAATCATATGTTTATAGTGATTCCTCATCTGATGGCAATAAAAAAAACAATGACAAAATACAGACGGGATTTCTATATAATGAAAAGAAAAATGAAAAAACATTAGAATTTAAAAGAAGGAAAGTAAACAAAATTAATAAGAAACTCACAACAGATGATGTGAAATCTAATATTTTTAAAAAAATTGATACTTTTGAGGAAGCATCATTTAAAAAAGACAAAGTTTCTAAAAGATATCTTAATAACAATGAAAAAGAAAAATATTATAAAGATAGAGATAAAAATAAAATTAAAAAAAATAATATTAAGGATAAACATGTTAATCAAAAGTATAATATATATAATTCTTCTACATCACCAGATAATTCAGATATAGATAATTTATATAAT…	MIAKSYVYSDSSSDGNKKNNDKIQTGFLYNEKKNEKTLEFKRRKVNKINKKLTTDDVKSNIFKKIDTFEEASFKKDKVSKRYLNNNEKEKYYKDRDKNKIKKNNIKDKHVNQKYNIYNSSTSPDNSDIDNLYNHKENKNNHKYNKSDYSEDSINISINIKNDESNKYNLSNKQHHNRYSNKTFEKDEKQKKDYYKKNNDKILDEIWYTKEDEFVDSFYNMDIEATYEKEKKMINNLKTRINSNTGKKVNQKNLDNNLWELNKLKQGGVTSTYNKLQLEKINEANVTNEIKKIVLTRTVNPPFIDKFKSYNKRFVNIEQRNNFDDQKSEKKKSDNINNDKYYSNKPIQSTSYSTVVKDETCDFVKAAKKGSEFLKYFKSENEKSKARDRYWEISNSKLGE…	1151	0	null	no	GO_0005524, GO_0004386, GO_0003676	GO_0004004	GO_0005524,GO_0004386,GO_0003676,GO_0004004	0	0	0	0	0	0	0	0	0	0	0	0	0	0	0	0	0	0	0	0	0	0	0	0	0	0	0	0	0	0	0	0	0	0	0	0	0
1379	PF3D7_0623700	ATP-dependent RNA helicase SUV3, putative	SUV3	ATGTTTATAAAAAAAAACGAATTTTTTTTTTTTAATATTTATGATTTATTAAAGAAACGAAAGTTTAGGTTTAGTCACTTTATAGAACGTACGAATGATAATTTTAAAAAACAAGTAAATGAAGAATATGCAAGGGTTCAACGCAATATTTCGTTAAATGAGGATGATATATTAAAAATAAGAAATGTCATGATAAGAATTGGGAATGATAAAAATATACTTAGTAGTATTATACATACATATAATATTCCTTCTTTTTTTTTATTAGATAAGGATGTAAGAAATCATTTCTTGAGTTATATAAAAGATGATATAAGTTATGCTGATCAATTAAGAAATTGTATCCTTATGCATAATGATGTTGATGAAAACAAGGATGATGATAATTTTTTTAATGTA…	MFIKKNEFFFFNIYDLLKKRKFRFSHFIERTNDNFKKQVNEEYARVQRNISLNEDDILKIRNVMIRIGNDKNILSSIIHTYNIPSFFLLDKDVRNHFLSYIKDDISYADQLRNCILMHNDVDENKDDDNFFNVQVKKNNNENIKPDNYCNKLDLFNHSNENYTTTPPNQIYNNNNNKNNNNNNNNYYYNNYCCDKQNIHNITKEKLKRSDEIIVNILLIFIKKYYYKQWMFYEHIKRLCDYTEINLYIKNNNKKKVRNIHLYVGPPNSGKTYHAFQKLMLSKNGLYCSPLRLLAWEVYSKLTRMNKKVNLLTGQEIIIKHNNNKQYGDIHHNNNQHGDIHHNNKQHGDIHHNNNQHGDIHHNNKQHGDIHHNNNQHGDIHHNNKQHGDIHHNNNQHGDI…	1137	0	null	no	GO_0016817	GO_0004004	GO_0016817,GO_0004004	0	0	0	0	0	0	0	0	0	0	0	0	0	0	0	0	0	0	0	0	0	0	0	0	0	0	0	0	0	0	0	0	0	0	0	0	0
232	PF3D7_0209800	ATP-dependent RNA helicase UAP56	UAP56	ATGGCTTCAATGGATCATAATGCTCAAGATGAATTAGTAGATTATGAAGATGATGAGAATATATTAGATAGTAAAGATGTTAAAGGGAATTTAGGAAATAATATTTTAAATAATAATAATAAGGGTGGAGCTATGAGAGGTAGTTATGCAACTGTGCATACAGGAGGATTTAAAGATTTTTTTTTAAAACCAGAATTATTAAGAGCAATAAGTGAAAGTGGTTTTGAGCATCCTTCAGAGGTACAGCAAGAAACTATTCCCGCAGCAATTACAGGAACTGATATCCTTTGTCAGGCCAAGAGTGGTATGGGAAAAACAGCCGTTTTTGTTTTATCCATTTTACAACAGCTAGATACGAATGAAAATCAAGATATGCAGGACACGAAAGAAATGAATAAT…	MASMDHNAQDELVDYEDDENILDSKDVKGNLGNNILNNNNKGGAMRGSYATVHTGGFKDFFLKPELLRAISESGFEHPSEVQQETIPAAITGTDILCQAKSGMGKTAVFVLSILQQLDTNENQDMQDTKEMNNDNNNNGDNKFVRCLGLAHTRELAYQIKNEFDRFSKYLKNVRCEVVYGGISMNKHIKLFKEDNIPHIIIGTPGRILALIREKYLITDKIQHFVLDECDKCLEKLDMRSDVQKIFISTPLKKQVMFFSATMAKEMRDVCKKFLQNPVEIFIDDEAKLKLHGLLQHYVKLQEKDKTRKLIEILDALEFNQVIIFVKSVTRAITLDKLLTECNFPSIAIHGGLEQQERIERYDKFKKFENRILVSTDLFGRGIDIERVNIVINYDMPENS…	457	0	null	no	GO_0005524, GO_0003676	GO_0004004, GO_0003723	GO_0005524,GO_0003676,GO_0004004,GO_0003723	0	0	0	0	0	0	0	0	0	0	0	0	0	0	0	0	0	0	0	0	0	0	0	0	0	0	0	0	0	0	0	0	0	0	0	0	0
1452	PF3D7_0630900	ATP-dependent RNA helicase HAS1	HAS1	ATGATGGATGATGATAATGATTATAATACAATGAAAAATTCAAATGATAATAATTTGAAAAAAACCAAAAAAAACAGTATAATAAAAAAGAAAAAAAAGAAAAAGAAAAAAGAGATTTTAGAAAATAAAGATAGTAATATAGATAACTTAAAAAATGAAAATTATAGAAGCGAATCAGAAGCAGAAAGTGAAAGTACTAATGACAGTGTTTCATTGAACAATATAGAAGAAGATAACGAATTAAATGAAAATAGCGAAAATAATGAAAATAACGAAAATGACGAAGATAATAAAAATAATAAAAATAATGAAAATAATGAAAATACTTCAAGTGAAGAAATTTGTGACCATGATAAAAATGATAAAACATACACAGACGAAATAAAAAGTAATAACAGT…	MMDDDNDYNTMKNSNDNNLKKTKKNSIIKKKKKKKKKEILENKDSNIDNLKNENYRSESEAESESTNDSVSLNNIEEDNELNENSENNENNENDEDNKNNKNNENNENTSSEEICDHDKNDKTYTDEIKSNNSDHNNNNSKEHFYSELKFEELNICDALKKGLKELNFVTLTEIQAKCIPHFLSGKDILGAAKTGSGKTLAFLVPSINILYNIKFLPKNGTGVLIISPTRELCLQIYQVCKDLCKYIPQTNGIIIGGMSRNEEKKKFIHGINILIATPGRLLDHMQNTKEFIYKNLICLIIDEADRLLQIGFEEEINLIIKRLPKKRQTALFSATQTTKVESLIRLSLQKPIFIEVTTKIATVERLQQGYALVDEDKRFLLLFTFLKKNMSKKIMVFFN…	601	0	null	no	GO_0005524, GO_0003676	GO_0004004, GO_0003723	GO_0005524,GO_0003676,GO_0004004,GO_0003723	0	0	0	0	0	0	0	0	0	0	0	0	0	0	0	0	0	0	0	0	0	0	0	0	0	0	0	0	0	0	0	0	0	0	0	0	0
1655	PF3D7_0721300	ATP-dependent RNA helicase DBP7, putative	DBP7	ATGAATAAGCATGATCAAAAAAAGAAAAGAAACAAACAACATACTGACAATGTGATGGGTAAAAAATCCAAGGGATTTATTAAAAACAAGAAAAATATCGGAGAATCAGGAAACGAAAAAAAAAGAAATAATAACTTTAATAATATTTGGAAGAAGAAAAAGAGAAGTGGAAATTCGGAAAAAGATCAAGTTGACATACTAGGATTATTAAAAGGTGATAGTGAAAATATGAATGATGATGATGATAATAATATGAACGATGATTATAATAATAATAATATTAAAGGTGATTATAATAATAATAATATTAAAGATGATGATGTTGATGATGATGATTATGATGATGATGATGATGACAATTTTGATGAGAACAAAAATTGTAATGATAATTGTTCTTCT…	MNKHDQKKKRNKQHTDNVMGKKSKGFIKNKKNIGESGNEKKRNNNFNNIWKKKKRSGNSEKDQVDILGLLKGDSENMNDDDDNNMNDDYNNNNIKGDYNNNNIKDDDVDDDDYDDDDDDNFDENKNCNDNCSSKHKRNVPSKKEHDILELNNINFNETRKKMINYKNIFDGKFCDLKYILSESLINTLEKNEFIKMTSIQKMSIPLFFKPNDIFLKSMTGSGKTLCYAIPSIEKILNMKEKVKITRDMGIFVLVLSPTRELAIQINNLFCILTKPYPYIVASCITGGEKKKSEKNRLKKGISILTCTPGRLLDHLENTKSLKLTFLKMVILDEADKIIYLGTQDKIKLIYDMIRKIKQEEFSKVHKKKKKEENEVLDHINDTNMSDMNNISNDHSNDYE…	899	0	null	no	GO_0005524, GO_0003676	GO_0004004, GO_0003723	GO_0005524,GO_0003676,GO_0004004,GO_0003723	0	0	0	0	0	0	0	0	0	0	0	0	0	0	0	0	0	0	0	0	0	0	0	0	0	0	0	0	0	0	0	0	0	0	0	0	0
3909	PF3D7_1302700	ATP-dependent RNA helicase DHR1, putative	null	ATGACAAAAGGAAATGCAATATTGATAGATGATATTAATACGACTTTTATTAAAGATGACGAAGAAAAAAAAGAAATGGTCCAAGCAAATGACGGTTCAAGTTCTTCAACACCAGTCTCTTTTAATGAACCTAACAAATTAAGTAATAAAGAAAAAAAGAAATTAGAATATCAAAAAAGAATACAAAGAAAAAAAGAAAAACAACTCAAAAAAGTTCAGAAACTAATTACAAAAACACAATCAGGATCGCTAAGTTATTTGAAGAATAATATTGCTAGTTCGTCCGTATTTAATAAATTAGTAGATCAAAAAAAGGAACAGAACAAAAATAATATTAAAAATAATTATATAGAAAATGAAGCTATTGGAAACAAAAATAATGATGTAAATTTAAACAAT…	MTKGNAILIDDINTTFIKDDEEKKEMVQANDGSSSSTPVSFNEPNKLSNKEKKKLEYQKRIQRKKEKQLKKVQKLITKTQSGSLSYLKNNIASSSVFNKLVDQKKEQNKNNIKNNYIENEAIGNKNNDVNLNNNDINVKNNDLNIMNSDNINNTNDIYNNSNNKKKKKNKIKNINKNTADNSSESSHEEQNGKSDLYCALENISKKKLIKKLKNKNKHEKEIEKKKLFKKIQEFKLNNTEQKNLMIPFDIKAVPKNTEHLDKLLKTYEELNIELPHYLNIIKKKIEKKRKRFLDKMEYLKEEKNVQLTESIKSKEVDGDVKKKKNKINSLKEESESYIETNSINETYTDQCNIIIKSESSDEDYNKMEPHGSYDDSDMDHENISSYHNSTKEKKNDING…	1566	0	null	no	GO_0005524, GO_0004386, GO_0003676	GO_0004004, GO_0003724	GO_0005524,GO_0004386,GO_0003676,GO_0004004,GO_0003724	0	0	0	0	0	0	0	0	0	0	0	0	0	0	0	0	0	0	0	0	0	0	0	0	0	0	0	0	0	0	0	0	0	0	0	0	0
560	PF3D7_0320800	ATP-dependent RNA helicase DDX6	DOZI	ATGAGTTATAAAACCAATTGTACGAACTCTAATGCTAATACAAATACTTTGAATAGTTCTTCAAATTATAACAAAATAGATGATAATATAATATTAGATGAAGAATGGAAAAAGAAAATTCTGGAACCATTAAAAGATCTAAGATATAAGACAGAAGATGTAACGAAAACGAAAGGCAATGAATTTGAAGATTATTTTTTGAAGAGAGAATTATTAATGGGTATCTTTGAAAAAGGATATGAGAAACCATCACCTATACAAGAGGAAAGTATACCTGTAGCTTTGGCTGGAAAAAATATTTTAGCAAGGGCAAAAAATGGTACAGGCAAAACAGCAGCTTTTGCTATACCCTTACTAGAGAAATGTAATACCCACAAAAATTTTATTCAAGGACTCATT…	MSYKTNCTNSNANTNTLNSSSNYNKIDDNIILDEEWKKKILEPLKDLRYKTEDVTKTKGNEFEDYFLKRELLMGIFEKGYEKPSPIQEESIPVALAGKNILARAKNGTGKTAAFAIPLLEKCNTHKNFIQGLILVPTRELALQTSAMIKELGKHMKVQCMVTTGGTSLREDIMRLYNVVHILCGTPGRILDLANKDVANLSGCHIMVMDEADKLLSPEFQPIVEELMKFLPKEKQILMYSATFPVTVKEFRAIYLSDAHEINLMDELTLKGITQYYAFVKERQKVHCLNTLFAKLQINQAIIFCNSITRVELLAKKITELGYSSFYIHARMSQTHRNRVFHDFRNGACRCLVSSDLFTRGIDIQSVNVVINFDFPKNSETYLHRIGRSGRYGHLGLAIN…	433	0	null	no	GO_0005524, GO_0003676	GO_0004004, GO_0005515	GO_0005524,GO_0003676,GO_0004004,GO_0005515	0	0	0	0	0	0	0	0	0	0	0	0	0	0	0	0	0	0	0	0	0	0	0	0	0	0	0	0	0	0	0	0	0	0	0	0	0
805	PF3D7_0422700	eukaryotic initiation factor 4A-III, putative	EIF4A3	ATGGAAAAGGATGATCACTATAAGACTTCAGAAAAATATGAAATATGCACAAGTTTTGAAAATATTGGAATAGATGAGGGTTTACTGAGAGGAATATATGCATACGGTTTTGAAAAGCCATCTGCTATTCAACAGAGGGGTATAAAGCCTATATTAAATGGAAGGGATGTAATATTACAAAGTCAGAGTGGTACAGGTAAAACTTGTGTGTTTGCGGTTGGTGCTTTGAATTGTGTAAATAGGAATTTGAATGAGACTCAAGTAATAATATTATCTCCAACAAGAGAATTAGCTGAGCAGACTCAGAAGGTTTGTTTAGCATTGGCTGATTATATCCATGTGACAATATATTGTTGCATTGGTGGTAAGAAAATGAGTGATGATATAAAAGCATTAAAT…	MEKDDHYKTSEKYEICTSFENIGIDEGLLRGIYAYGFEKPSAIQQRGIKPILNGRDVILQSQSGTGKTCVFAVGALNCVNRNLNETQVIILSPTRELAEQTQKVCLALADYIHVTIYCCIGGKKMSDDIKALNNGVHVISGTPGRIYHMLNLRHLKCKYIKQLVIDEADEMLNKGFKEQVYDIYRFLSPNTQIILSSATLPQEVLEITNKFMHKPVKILVKRDELTLEGIKQFFVSIEKEQWKYETLADLYESLTITQAVVFCNTQMKVDWLTKKMLESNFTVCKMHAGMSQSERDDIMLKFRQCKFRVLISTDIWGRGLDVQEVSLVVNYDLPNSRESYIHRIGRSGRFGRKGVAINFVKNDDIKILRDIEQYYSTQIDEMPMNITELL	390	0	null	no	GO_0005524, GO_0003676	GO_0004004, GO_0044822	GO_0005524,GO_0003676,GO_0004004,GO_0044822	0	0	0	0	0	0	0	0	0	0	0	0	0	0	0	0	0	0	0	0	0	0	0	0	0	0	0	0	0	0	0	0	0	0	0	0	0
3547	PF3D7_1219600	aminophospholipid-transporting P-ATPase	ATPase2	ATGTCCTTAGTTTATAGAAAAACACTGAACTTTTTAAAAGGAAAAAATGAAGATGATAAGGATGTTAAAATAAACATAAATGGGGAAAACAAAAGGACCTGTAACAATTCCGTGATAACGTCTAAATATACCGTTTTTAATTTCATATTTTTAAATATGTATGAACAATTTCATAAGATATCAAATGTGTACTTTTTTTTCATTGGTATATTACAAGTAATACCTCAATTTACTGCTACCAATGGAATTCCCACAGTTTTTTTTCCCCTTTTAATTGTGCTAACAGCAAATGCCATAAAAGATGCTTTTGAAGATTGGAATAGGCATAAAACCGATAAAATTGAAAATAATAGAATGTGTTATGGTATTGTAAGTGAAGAAGAAAAGAAAATATATCAA…	MSLVYRKTLNFLKGKNEDDKDVKININGENKRTCNNSVITSKYTVFNFIFLNMYEQFHKISNVYFFFIGILQVIPQFTATNGIPTVFFPLLIVLTANAIKDAFEDWNRHKTDKIENNRMCYGIVSEEEKKIYQEKSNKKNIFKKLKRYFFGNRKICNTENYYDEDDMCDDEITDINDYINNYEDNLENIEGTVKKRWKDIKAGDIILCRRSEFFCADILLLCTSHKNGIAFVETSSLDGETNLKVKEANTFLFNILGNDRNSAIDNVKNLKGFILSDKPNKDLSTMYGTIYFEKDKKIDVENIGIQELLKKTTEEIEYRKKRLSSVDLSKSSSAIGSNLCNNNNKSDSKSDIKNYNKDDDDFDDMDENNILKNDNYIRIPFDEKQFVLRGCKLKNTDWI…	1555	10	null	no	GO_0005524, GO_0019829, GO_0000287, GO_0046872, GO_0000166, GO_0004012	GO_0004012	GO_0005524,GO_0019829,GO_0000287,GO_0046872,GO_0000166,GO_0004012,GO_0004012	0	0	0	0	0	0	0	0	0	0	0	0	0	0	0	0	0	0	0	0	0	0	0	0	0	0	0	0	0	0	0	0	0	0	0	0	0
2797	PF3D7_1033100	S-adenosylmethionine decarboxylase/ornithine decarboxylase	AdoMetDC/ODC	ATGAACGGAATTTTTGAAGGAATTGAAAAAAGGGTTGTGATCAAATTAAAGGAGAGTTTTTTCAAAGGAAATAGAAATGTGAACTCCTTTTTAGATATACCTAAAGAATTATGGGAAGAAAAATTAAAATACATTGGTTGTAGTATTGTATCGGAAATAAGTGAGGACAAGAACGAGAGAAGAGGTGAACGATGTCGTGTGTATTTATTGTCAGAGAGTTCTTTATACATTTTTGATGATTCTTTATTTATTAAGACATGTGGCAAAACAAGAGTTTTATTTTTCATACCGTTTGTGGTTGATTTATTAATATATCATATGGATAATGTAGGTATAATAGAAAAGAATTGTGTATATGATGAGACGTTTATTGAAAACGAGAAATTCCATAATATAGCT…	MNGIFEGIEKRVVIKLKESFFKGNRNVNSFLDIPKELWEEKLKYIGCSIVSEISEDKNERRGERCRVYLLSESSLYIFDDSLFIKTCGKTRVLFFIPFVVDLLIYHMDNVGIIEKNCVYDETFIENEKFHNIAEFIKEHFLYCFFTHMNYRNKTKDGYFEQEYPHKSLEDEKKFFEFFFKNVQMYNTHLPMEKMHYIFFYSSDDVHMTDIASTFKFCSEIHLFGINKYNEKNQFHDAYLNNKSLNLFTRVHEDNLKLYDSSDADKEVTTHIYSTRGTYEDTGMVNCVDVIYKNESTLLNRNNIENIPSIENKESNNNSRCCHNNNYSGSCHNIVSVVPSERNNDHVHHRHYEDTLNRSNISAEDNNRNAQLEKEKDEDVRRDDEENKVLIKMIDTNLYE…	1434	0	null	no	GO_0004014, GO_0003824	GO_0004014, GO_0004586	GO_0004014,GO_0003824,GO_0004014,GO_0004586	0	0	0	0	0	0	0	0	0	0	0	0	0	0	0	0	0	0	0	0	0	0	0	0	0	0	0	0	0	0	0	0	0	0	0	0	0
1784	PF3D7_0802600	adenylyl cyclase beta	ACbeta	ATGTTAAAAAATATATTTAGCGAGTATTTAAAATCGTATGATAACAAAGACGAGAACTATGAGCGTATAAATAACCTGAGCAGAAATTATTCATGTGACTATACTTCTGATTGGAGATGGTTTAGTATAAAATGCGAACGGTTTTTAGAAAATGAATTATATAAGAAATATAATAAAGAAGAAAGAGAAAAAAAGAAGAAAAATAAAAATATCATAAAAGAAAATGAGAACCTTGCAATATTTAGGTCCTTCTTTCCCAAAATTTTGTTAAATATTTATAGCAAATGTGAAAACCCGGCACAGTTTTTCTCAAATCTTGTTATTCAGAAGTTTAACTCGGTTGTGTTTTTCTGTGACGCCAGCGGATTTTCTAACCTCGCTGAACAACTCGACAAACGA…	MLKNIFSEYLKSYDNKDENYERINNLSRNYSCDYTSDWRWFSIKCERFLENELYKKYNKEEREKKKKNKNIIKENENLAIFRSFFPKILLNIYSKCENPAQFFSNLVIQKFNSVVFFCDASGFSNLAEQLDKRINGTELLGNCLNKFFNILIKIIDYWGGDIIKFSGDAVLVIWPLHNVLKNKKKKKKKNGTQNNDSDDEHVNLKDNKTSHDRYNLDKHIDMEKHKTNFENFNLSNNHNNIHNIYNNDDDDYGDHQNEVYDNIKNYNLKNNKISKSNIAQANNSDDNYPSDYNKKKKNQNAVEIRKICLLALGCCMDIHKLLNKFPTPIENKYLKVHIAITYGKVSFLQIGNVLRKREYLLSGKPLEEIGAGESLAKNGESVLSYSFYKNIKDKVMVQG…	2279	0	null	no	GO_0005524, GO_0004383, GO_0016849, GO_0004672, GO_0004872	GO_0004016	GO_0005524,GO_0004383,GO_0016849,GO_0004672,GO_0004872,GO_0004016	0	0	0	0	0	0	0	0	0	0	0	0	0	0	0	0	0	0	0	0	0	0	0	0	0	0	0	0	0	0	0	0	0	0	0	0	0
4629	PF3D7_1404600	adenylyl cyclase alpha	ACalpha	ATGCCAGAACCAAAACAAATATATGCAAATAATATTTTTGATAATGATAAGTTGAAAAGATTTTTCTTAAAATATAGATCAAAAGAAAAAGTATTATATTCCTTTACATCAGAAAATGACATCATAAATGAAGAGAAGAGAAAAAGCAAAAATAACTTGTGCATGTTAAAATATAAAAATATATGTCTTAATATACATACAAGCAAATTTTTCAAATACTCCAAATGGAAATATGATTTTATATCAGATATTTTTATTTCCATTCTCTTATTTGGATGTCTTATCGAAATAATTTTTAATTTTTTAATGGATTCAACATATATCTTTTATTTTATGTTTTTTGATATTATATCGTTCATGCTGTTATTCTTTGATATCTTTCTTTTCGAAAAATATTTT…	MPEPKQIYANNIFDNDKLKRFFLKYRSKEKVLYSFTSENDIINEEKRKSKNNLCMLKYKNICLNIHTSKFFKYSKWKYDFISDIFISILLFGCLIEIIFNFLMDSTYIFYFMFFDIISFMLLFFDIFLFEKYFFDFFIYFTNSLYTWKKIDKDNIIYLIQLFKSLRIIKIYRFVINFIKKHTKEKYKHRNEWNFEKMESMKNRPLKESLKFTNKMHLALIKRYFMSLIFIMLSYIMIEIIYISKESKSPMNYFIYNLDLIVFDEFYETEFLKALYFYSAIQKNKRDEEYLISIKSKRKLKNFINKKEIDISGINYLLWDFTNLSHNDLLKFVTPSSANQNVEEEIILDHTIKNINELRYFETKIYESKDFIFHINIKRYIERTIKNIIILKIFIIIFSF…	865	4	null	no	GO_0016849	GO_0004016	GO_0016849,GO_0004016	0	0	0	0	0	0	0	0	0	0	0	0	0	0	0	0	0	0	0	0	0	0	0	0	0	0	0	0	0	0	0	0	0	0	0	0	0
2548	PF3D7_1008900	adenylate kinase	AK1	ATGAATGAAAATTTAGAAAATTTTTCAACAATTGATTTGTTGAATGAATTAAAGAGGAGGTATGCATGTTTGAGTAAACCAGATGGTAGATATATTTTTTTAGGTGCCCCAGGATCTGGAAAAGGAACACAATCCTTGAACCTTAAGAAGTCTCATTGTTACTGTCATTTATCAACAGGTGATTTGTTAAGAGAAGCAGCTGAGAAAAAAACGGAACTTGGACTTAAAATTAAGAACATCATTAATGAAGGGAAATTAGTTGATGATCAAATGGTATTGTCACTAGTCGATGAGAAATTAAAAACACCTCAATGTAAAAAAGGATTTATTCTTGATGGATATCCAAGAAATGTAAAACAAGCTGAAGATTTAAATAAGCTACTACAAAAAAATCAAACA…	MNENLENFSTIDLLNELKRRYACLSKPDGRYIFLGAPGSGKGTQSLNLKKSHCYCHLSTGDLLREAAEKKTELGLKIKNIINEGKLVDDQMVLSLVDEKLKTPQCKKGFILDGYPRNVKQAEDLNKLLQKNQTKLDGVFYFNVPDEVLVNRISGRLIHKPSGRIYHKIFNPPKVPFRDDVTNEPLIQREDDNEDVLKKRLTVFKSETSPLISYYKNKNLLINLDATQPANDLEKKISQHIDG	242	0	null	no	GO_0005524, GO_0004017, GO_0016776	GO_0004017	GO_0005524,GO_0004017,GO_0016776,GO_0004017	0	0	0	0	0	0	0	0	0	0	0	0	0	0	0	0	0	0	0	0	0	0	0	0	0	0	0	0	0	0	0	0	0	0	0	0	0
1922	PF3D7_0816900	adenylate kinase 2	AK2	ATGGGATCATGTTATAGTAGAAAAAATAAAGTATCAACAATATCATTAGATGAAGAGGAAAAAAAAAAAGAAAAAAAGAAGAAAAAAAAAATATATATTTTAAATGGAGCATCTGGGTCAGGAAAAGATACACAATGTAGATTATTAGAAAAAAAATACAATTATAAAATAATTTGTATAAGTAAATTATTAAAAGAATATAAAGAAGAATATAATAAAGAAAATGTATTAAATGAAGAAGAAAATTATTTTGATGAAATAGAAAAATGTATGATAGATGGATCTTTAGTTAATGATCAAATTGTTATAGAGATATTTCATAAACAATTGAACAAATATATAAATGATGATAAATATAATGGTATTATAATAAATGGTTTTCCTAGAAATTATGAACAA…	MGSCYSRKNKVSTISLDEEEKKKEKKKKKKIYILNGASGSGKDTQCRLLEKKYNYKIICISKLLKEYKEEYNKENVLNEEENYFDEIEKCMIDGSLVNDQIVIEIFHKQLNKYINDDKYNGIIINGFPRNYEQALLIIQNNISITKFINIQVGKDTLWTRINNRIIDPITNISYNENIIQIIKKKREGQELSDKEQKQLIIDNHLYNNLSNDILERLTKRKDDEEQVFNKRFQLYIESEQKINSLFKNICKNVDGEKSINDIFDQICSIIDDNPN	275	0	null	no	GO_0005524	GO_0004017, GO_0005515	GO_0005524,GO_0004017,GO_0005515	0	0	0	0	0	0	0	0	0	0	0	0	0	0	0	0	0	0	0	0	0	0	0	0	0	0	0	0	0	0	0	0	0	0	0	0	0
199	PF3D7_0206700	adenylosuccinate lyase	ADSL	ATGGATGTACATGTGAACCAACTGAAAAACATATCGCCCATCGACGGGAGATACAAAAGATCGTGCCAGGAAGTAAGCGAATATTTTTCAGAGTACGCTTTAATAAAATATCGAATAATAGTTGAAATAAAATGGTTATTATTTTTAAATGACAAAGAATATTTCTTTCCAAAAGTTAGTGAGAAGAGTTTGAGTAATATCACATCGATTATGGAATTAATAAATGATAATGATATATTACGTGTAAAAAAGATAGAAGAAGAAACGAATCATGATGTTAAGGCGGTTGAATATTTTATAAGAGAGAAATTAGAAAGTTTAAAAAATGAAGAAATAACAAAAGTAATACCATATGTACATTATTTATGTACCAGTGAAGATATTAATAATATAGCATAT…	MDVHVNQLKNISPIDGRYKRSCQEVSEYFSEYALIKYRIIVEIKWLLFLNDKEYFFPKVSEKSLSNITSIMELINDNDILRVKKIEEETNHDVKAVEYFIREKLESLKNEEITKVIPYVHYLCTSEDINNIAYGLCLYNCIHNIIIPNIQNIIDKLKEFSFNYSDVSLLSKTHGQPASPTTFGKEMSNYYYRLYKHINKLKNIEIYVKFNGAVGNFNAHKVCDPNIDWIDNIKYFIETYFNLHFSLYCTQIQDHDYICEISDTLARLNYTLIDLSVDMWLYISSNVLKLKVIQKEIGSSTMPHKVNPIDFENAEGNLHLANSLFKLFSSKLPISRLQRDLSDSTVLRNLGSSFAYSLISYKSLLRGLNKIDVDQNVMNEQLNQNWCTLAEPIQIIMKKY…	471	0	null	no	GO_0004018, GO_0003824	GO_0004018	GO_0004018,GO_0003824,GO_0004018	0	0	0	0	0	0	0	0	0	0	0	0	0	0	0	0	0	0	0	0	0	0	0	0	0	0	0	0	0	0	0	0	0	0	0	0	0
3035	PF3D7_1117600	peptidyl-tRNA hydrolase ICT1	ICT1	ATGTTTGCATTAAGTAGATATTTTTTACTATCTTTTGAAATTCCCTTTAATCAAATTCAAAAAATTACAGCACGTTCATCAGGTCCAGGAGGACAAAGTGTCAATAAGGCTGAAACGAAAGTACAAATCCGATTTAATGTGGATGATGCTAAATGGATTCCTCTAAATGTTAAAGAAAATTTAAAAAAGATTTATAAAAATAAACTGAGCAAAAACAACGATCTCATAATTGAATCTGAAGAAACGTCTTCACAAATATCTAACTATAAAATATGTGCTGACAAACTTAAACATATTCTTGAAGAAGCCGAAAATTATAAAGAAAAAATTAAACATACATGTATAAAAGATTTTATTCATTTAATTAAGTCTGATGAACAGATAAAAAAATACAAAGAT…	MFALSRYFLLSFEIPFNQIQKITARSSGPGGQSVNKAETKVQIRFNVDDAKWIPLNVKENLKKIYKNKLSKNNDLIIESEETSSQISNYKICADKLKHILEEAENYKEKIKHTCIKDFIHLIKSDEQIKKYKDNLINQKKKRQQRKFNKRDYD	153	0	null	no	GO_0003747, GO_0016149	GO_0004045, GO_0043022	GO_0003747,GO_0016149,GO_0004045,GO_0043022	0	0	0	0	0	0	0	0	0	0	0	0	0	0	0	0	0	0	0	0	0	0	0	0	0	0	0	0	0	0	0	0	0	0	0	0	0
4525	PF3D7_1365500	aminomethyltransferase, mitochondrial, putative	GCVT	ATGAAGAATATTTTTAAATATAAAAATAGATTAACCTTTTTTAGAAAAGGTTTCTCAACAACTAATAAGCCAAAGGTGGAAATAAAAAAAACCATACTGTATGATTCACATAAGAAGAATAATGCAATTTTTAAGATACAACATGGTTTCTATTTACCAGACGAATACAAAGACATCACGTTGATTACCTCGAATTTGCATACTCGAACAAACTGTTCATTATTTGATTATACCTATAGACCTATATTAAAAATAAGTGGGGAGGATAAAATAAATTTCATTGAAAAATATGTAGGTAGTGATATTAAAGGATTATGGGAAAATGAATGTAGAATTAGTTTACTGTTAAATGACAAAGGTGGTATTATAGACGATATTATGATTATACTTCGAGAGAAA…	MKNIFKYKNRLTFFRKGFSTTNKPKVEIKKTILYDSHKKNNAIFKIQHGFYLPDEYKDITLITSNLHTRTNCSLFDYTYRPILKISGEDKINFIEKYVGSDIKGLWENECRISLLLNDKGGIIDDIMIILREKYLLLYLNIQCKEKVYKYLKDKLLENGKLQVQIEEFTSHSSICIQGSKSSDVLKELIDYNNESVETNLDNCSFMSSTLTKINKIDNCILNRYTCTGEDGFDILIPNKYVNDLYNLILKNELVKPGGLAVQNTLRLESGFCEYGKDINEDITPIESNYKWSLGQRRLKELNFNGAHIIMDQIKNGTKIKRVGILINTNIVPKENTKIYSHENAEQIIGYITSSVFSPVLQKPICMGYVKSEYAHINNLIKVDCLNKLEIAQITKLPFV…	406	0	null	no	GO_0004047	GO_0004047	GO_0004047,GO_0004047	0	0	0	0	0	0	0	0	0	0	0	0	0	0	0	0	0	0	0	0	0	0	0	0	0	0	0	0	0	0	0	0	0	0	0	0	0
2144	PF3D7_0906500	arginase	null	ATGTTGGATACTATAGAAAGTTACATCAAAAGTCACAAGGAAAAGGAAAACCTTTATGTTAAGAAAAACGTTTCCATTATTGGTTCTCCTCTTGCCGCTGGTCAACCTCTTGGAGGGGTGCAATTAGCATGTGATGACTTGAGAAAATTAGGTTTGCACAATGTTATAGATGTGTTAGGATGGAAATATGAAGATATAGGCAATATAGATAATGGGGATAATGAAATGAAACAAGAAAAAAAAACTAATAATTATATTAATAATAATGATAATAATAATGATAACAATAATGATAATAATAATGATAATAATAATAATTGTTATATTCCCAATGGTGTAATTAAAGAAAAGAAACATGATTTGTCAAATAATAAAATGAATGGATATGTGAACCATAAT…	MLDTIESYIKSHKEKENLYVKKNVSIIGSPLAAGQPLGGVQLACDDLRKLGLHNVIDVLGWKYEDIGNIDNGDNEMKQEKKTNNYINNNDNNNDNNNDNNNDNNNNCYIPNGVIKEKKHDLSNNKMNGYVNHNFYGNYEENNVISTNDKYKNNCYYDNIRNIKEIGIFSKNLFDTMSNELRKKNFVLNIGGDHGVAFSSILSSLQMYQNLRVIWIDAHGDINIPETSPSGNYHGMTLAHTLGLFKKKVPYFEWSENLTYLKPENTAIIGIRDIDAYEKIILKKCNINYYTIFDIEKNGIYNTICTALEKIDPNSNCPIHISLDIDSVDNVFAPGTGTVAKGGLNYREINLLMKILAETKRVVSMDLVEYNPSLDEVDKKVHGDSLPILDNATKTGKLCL…	411	0	null	no	GO_0046872	GO_0004053	GO_0046872,GO_0004053	0	0	0	0	0	0	0	0	0	0	0	0	0	0	0	0	0	0	0	0	0	0	0	0	0	0	0	0	0	0	0	0	0	0	0	0	0
262	PF3D7_0212900	arginyl-tRNA--protein transferase	ATEL1	ATGAGTGAACAAGGAAATCTAAGTAGTCATAATATGAAATCTAAAATGGATAGAAATGATTCTGATAAAGTAAAATGTAAAAACCAAGAAGGTATTAATGAATGTGTCAATAAAGAAAACACACAAGAAGAAAATCAAAACATACATGATGAAAAAAAAAAATCATGTGAACAAAACAGAAATAATATAACTCTTGATGATGATGTAAATATAAACAAGATTGTAGAAAGAATGTCAGTGGAAGAGCCTGAAGTATTAACAAAAATATTCAATTTGATGAAAAATAATAACTGTTTAAATTTTTATCCGTTGCTTACACCTTATCATAATATAGAAAAAATTGTAGATATATTAATGCAAGAAAATTATGAATATGAAAATACGTGGACTGTACATTGT…	MSEQGNLSSHNMKSKMDRNDSDKVKCKNQEGINECVNKENTQEENQNIHDEKKKSCEQNRNNITLDDDVNINKIVERMSVEEPEVLTKIFNLMKNNNCLNFYPLLTPYHNIEKIVDILMQENYEYENTWTVHCDASFICRLLYEGFIPVASKQKLYKIENYETVMYKECLLIPKIHFIRSCMHPSEIHISKKVKKKCKHFYITIDKNFEGVMEGIVEKHGQNWLYPFVQEEFKKIFYKHVTYKNVELHSVELWFGKELVAGEIGNTVGSIYTSLTGFQRKSCAGTIQLCALAKLLEIQKFELWDLGMLLPYKKDIGSKEITMKEFFRKHRLFKHQPAEFKTPFMDKLNCSVLIKGTDPQTLKEQE	365	0	null	no	GO_0008914	GO_0004057	GO_0008914,GO_0004057	0	0	0	0	0	0	0	0	0	0	0	0	0	0	0	0	0	0	0	0	0	0	0	0	0	0	0	0	0	0	0	0	0	0	0	0	0
1032	PF3D7_0520600	bis(5'-nucleosyl)-tetraphosphatase [asymmetrical]	Ap4AH	ATGAAAATTAATATTATTAAAGCTTTTGGAATATTATTATGTAGACTTAAAAAATATAATCCAGTTACTACAGGAGATATTAATAAGTTTGAATTTCTCTTTTTGAAAGCTTCATATGCAGATAAACATTGGACACCTCCAAAAGGATTGCATGAAAATAATGAAAGCGGTTTAGAAACAGCAGTAAGAGAAACATTGGAAGAAACTGGAATAAATAAGGATAAATATAAACTTCTCAATTATCAAAAGACTTTAAAATATAATGTGAAAGATAAACCAAAAGAGACCACGTATTATTTGGCTATGTTGTTAAATAATGAGGAAAATGTAATTTTATCTGATGAACACACGGATTATAAATGGATTGGAAGCCATGAATCAGATACGTATAACCTTCCT…	MKINIIKAFGILLCRLKKYNPVTTGDINKFEFLFLKASYADKHWTPPKGLHENNESGLETAVRETLEETGINKDKYKLLNYQKTLKYNVKDKPKETTYYLAMLLNNEENVILSDEHTDYKWIGSHESDTYNLPESLADLLKEAEEFLNKEQL	152	0	null	no	GO_0016787	GO_0004081	GO_0016787,GO_0004081	0	0	0	0	0	0	0	0	0	0	0	0	0	0	0	0	0	0	0	0	0	0	0	0	0	0	0	0	0	0	0	0	0	0	0	0	0
3965	PF3D7_1308200	carbamoyl phosphate synthetase	cpsSII	ATGACTTCAGAATTTTGGCCAGATTTAGATTTTAAAACAGTTGGGAGGTTAATTCTTGAAGATGGTAACGAATTTGTAGGGTACAGTGTAGGTTACGAAGGGTGTAAAGGAAATAATAGTATATCATGTCATAAGGAGTATAGAAATATTATTAATAATGATAATAGCAAGAATAGTAATAATTCATTTTGTAATAATGAAGAAAACAATTTGAAAGATGATTTATTATATAAAAATAGTCGATTAGAAAATGAAGATTTTATTGTTACAGGTGAAGTTATATTTAATACAGCTATGGTTGGATATCCTGAAGCTTTAACGGACCCAAGTTATTTTGGTCAAATATTAGTTTTAACATTTCCTTCTATTGGTAATTATGGTATTGAAAAAGTAAAACAT…	MTSEFWPDLDFKTVGRLILEDGNEFVGYSVGYEGCKGNNSISCHKEYRNIINNDNSKNSNNSFCNNEENNLKDDLLYKNSRLENEDFIVTGEVIFNTAMVGYPEALTDPSYFGQILVLTFPSIGNYGIEKVKHDETFGLVQNFESNKIQVQGLVICEYSKQSYHYNSYITLSEWLKIYKIPCIGGIDTRALTKLLREKGSMLGKIVIYKNRQHINKLYKEINLFDPGNIDTLKYVCNHFIRVIKLNNITYNYKNKEEFNYTNEMITNDSSMEDHDNEINGSISNFNNCPSISSFDKSESKNVINHTLLRDKMNLITSSEEYLKDLHNCNFSNSSDKNDSFFKLYGICEYDKYLIDLEENASFHYNNVDEYGYYDVNKNTNILSNNKIEQNNNNENNKNN…	2375	0	null	no	GO_0005524, GO_0003824, GO_0046872	GO_0004088	GO_0005524,GO_0003824,GO_0046872,GO_0004088	0	0	0	0	0	0	0	0	0	0	0	0	0	0	0	0	0	0	0	0	0	0	0	0	0	0	0	0	0	0	0	0	0	0	0	0	0
3259	PF3D7_1140000	carbonic anhydrase	CA	ATGAAGCTTTTATATTTACTATATCCCATTTTACTCTTTTACAACGTAAACGTATTTATTAACTATAAGAAGAGTAGACTAATGCTTGAAATGATAGATAAATATAATACCCATTTTGTACAAACAACCAAACCTTATTACGAATTTAATGTAACTAATCTAACTAATTCCAAAAAAAAAAAAAAAAAAAAAAAAAGGGAAAATCACCTGATCGGTTCAGGTGAAAATATGCAAAAAAAGGATGAAAAAAATATAAAGGATTTTCATATAAATGATTATGAAATAGATGGGAAAACAATTCATAATAAAGAGAACAAGGATTCCTTTAAAATGAATAAAAATAAATTAAACGATAACGAAGAATTATTTTATATGGACAATATATTATCTTATAAACCA…	MKLLYLLYPILLFYNVNVFINYKKSRLMLEMIDKYNTHFVQTTKPYYEFNVTNLTNSKKKKKKKKRENHLIGSGENMQKKDEKNIKDFHINDYEIDGKTIHNKENKDSFKMNKNKLNDNEELFYMDNILSYKPNKKKLFTYSFSENEGNSEKEETLYNFKNMKNINSVQNNINKTFLYNKLKNVDYYEHGYNWDIGQCKTGKYQSPVDLPMKDLKERELKNISDVYLNLFDDDNYAWNNYNKPWMKGDFFYYYEYFIKKIVINRQNNIFQIKAARDGIIPFGVLFTTEQPAMFYADQIHFHAPSEHTFQGSGNRREIEMQIFHSTNYFYDIQDDKSKYKKKYGLHIYNNLKKNSKETSKKDSSRYHSYLMSFLMNSLSNEQLQNKYNKKKRIKKMKNQY…	600	1	null	no	GO_0008270	GO_0004089	GO_0008270,GO_0004089	0	0	0	0	0	0	0	0	0	0	0	0	0	0	0	0	0	0	0	0	0	0	0	0	0	0	0	0	0	0	0	0	0	0	0	0	0
4050	PF3D7_1316600	choline-phosphate cytidylyltransferase	CCT	ATGATAATTAAGGTTAATTCGGTTCAAACACAGAAGAGCCAAGATGGTAACAAAGTTCATAATAGTCAAGATGATATGGATAATGAGGAAAAAAGCATAAGGATATATGCAGATGGTGTTTATGACCTGCTACATTTGGGTCATATGAAACAGCTTGAGCAAGCCAAACATGTAGATAAGAATGTTACCCTAATTGTGGGTGTTACAGGAGATAATGAGACTAGAAAGTTTAAAGGTCAAATTGTTCAAACTCTAGAAGAAAGAACAGAGACTTTAAAACATATACGATGGGTAGATGAAATAATTTCTCCATGCCCATGGGTGATTACTCCTGAATTTATGGAGGAACATAAAATAGATTATGTTGCACATGATGATATACCATATGCAAATAATCAG…	MIIKVNSVQTQKSQDGNKVHNSQDDMDNEEKSIRIYADGVYDLLHLGHMKQLEQAKHVDKNVTLIVGVTGDNETRKFKGQIVQTLEERTETLKHIRWVDEIISPCPWVITPEFMEEHKIDYVAHDDIPYANNQKKKKKKKSKGKSFSFDEENEDIYAWLKRAGKFKATQRTEGVSTTDLIVRILKNYEDYIERSLQRGIHPNELNIGVTKAQSIKMKKNLIRWGEKVTDELTKVTLTDKPLGTDFDQGIDIIRDKVHDLFKLWRYHSKKLLKDFAKSFDPMFIIIRKRYRKDNLSAMYLSDSNYFSSSMKDELKKKKSLSSTFNNIDEYYYSADEEDTRDNSFYRVINKIANHTYYSEKENYETCFELEHSLRDKKKSLIFKDKNMKLSPDDLLHFTNP…	896	0	null	no	GO_0003824	GO_0004105	GO_0003824,GO_0004105	0	0	0	0	0	0	0	0	0	0	0	0	0	0	0	0	0	0	0	0	0	0	0	0	0	0	0	0	0	0	0	0	0	0	0	0	0
2690	PF3D7_1022500	citrate synthase, mitochondrial, putative	CS	ATGGAAGGAATAAGATACCTATCATGCAATAAAATTTTGTATAAAAGAACAGGGTCTACAAAAACGCTTATAAATTCATTAAGAAAAAGATATGTGCATAATAATTTTAAAAAGAAAACTTGTGAACAAGTATTAAATACTGTAAATAAATTGCATAATGAAAAGCGATATTTTAATTTTTCTTGTTCTTTTACAAAATCCAGTAGATGGAATATTTGTATGAATAGACATAACAGTCGTTTTTTTTCTAGCAATGAATCTAATAAGAATTTATATCTTGAAAATTATGCTAATATTAGAAAACATATTAATAGTATAGATAATGAAGAATCTGTTATTATGAATATTTTGAAAGAAAAGACATATGAATGTATTAAGAAAACAAGAGAACAATTAAAA…	MEGIRYLSCNKILYKRTGSTKTLINSLRKRYVHNNFKKKTCEQVLNTVNKLHNEKRYFNFSCSFTKSSRWNICMNRHNSRFFSSNESNKNLYLENYANIRKHINSIDNEESVIMNILKEKTYECIKKTREQLKEIIHTYPNTPISICTPNNVIGGLRNTITLITDTSILEKKKGILFRGKPVEKILREFPKWDNTCEYPMAEAMLWFLLTKEVPAVDDLKLLSRELYCRAKKIPQFVFDFIDNIPPFTHPMSQLVSTVSFLESLSLFKYKYSEGILKTDYWKYILEDAISLISQIQVIGAYIFKRTFINNDIRKGEGMNLDLDLDWSANFAKLIGYENKEVQDLLRLYFLLHSDHEGGNASAHVSHLIGSTLGNPYLSYSGCVIALSGPLHGLANQECL…	563	0	null	no	GO_0046912	GO_0004108	GO_0046912,GO_0004108	0	0	0	0	0	0	0	0	0	0	0	0	0	0	0	0	0	0	0	0	0	0	0	0	0	0	0	0	0	0	0	0	0	0	0	0	0
3283	PF3D7_1142400	coproporphyrinogen-III oxidase	CPO	ATGAAAGATGAGATAGCTCCTAATGAATATTTTAGAAATTTATGGGAAAATTTATTAAAGTCTGAGCAGAATAATATATGTAGTTTAATTGAATCACTTGATAATAAAAAGTTTCAAGAAGAAGTATGGTATAGGAAGTCTGGGAAGAATAAAAATTTGGGTGGTGGTATAACAAGAATTTTAGAAGATGGGAATATATTTGAAAAGTGTGCTGTAAATTATTCTTGTATATATGGAGCTATAGATAAGGAATCAGCTAAACAAATGTGTGTAAATCATTATAATAAAGAATTTATTAATACAACAAAGATTTGTCATTCGGATGATATCAATATTTTAATTTCACGAGTTTTAAATTCTCATAATATACGAATTATTAACGAAAAATATAAATTTTAT…	MKDEIAPNEYFRNLWENLLKSEQNNICSLIESLDNKKFQEEVWYRKSGKNKNLGGGITRILEDGNIFEKCAVNYSCIYGAIDKESAKQMCVNHYNKEFINTTKICHSDDINILISRVLNSHNIRIINEKYKFYASGISIIAHPVNPNVPTVHMNFRFFQIFIKTGKKKKKYNNLNNVNNNNLNNNLNNNFVKNKIDNNYKSIKHWFGGGCDLSPCYIFPDLFTEFHNSFKLVCDKYNHLFYRHFKIWCDLYFRIKHRNINRGIGGIFFDNLLNNIIKNKKVIRSGKLKDINKKNGNDPTINNNNNNNKDCKCYSCNNIMDKSYRMIYFFIQECIINFRKSYLHILLETVNFKYDDNMLKWQRVCRGRYVEFNLLYDRGTKFGIELNRYKIYRRKKKQKK…	470	0	null	no	GO_0004109	GO_0004109	GO_0004109,GO_0004109	0	0	0	0	0	0	0	0	0	0	0	0	0	0	0	0	0	0	0	0	0	0	0	0	0	0	0	0	0	0	0	0	0	0	0	0	0
5278	PF3D7_1470500	phosphodiesterase delta, putative	PDEdelta	ATGAATGAGTATAATAATGATAATATGGAACAGGAGAAGGAAAAAAAAAAAGAGGAACAGAAATATAAGAATATTATAAAGAAGGAATATTTTATATTTCCTCGATTATATGACAAAAATAAAGAAATAGAATACAATAAATTAAGGATACATAATATAAAAGAATATATTTGTATTCACCTGACCATATCTCTATTTATTATTCTTATAGAATGTTTTGTATTTTCCTTCAATTTGAATATAAAAGATACAACATATGTGGAAATATGTGTAGTAATATTTTCCATTTTGAATTGTTTGATGCATATTGTTGTGTTAATAAAAATGTATTTTTTTACATCTGAAAGTGTGTATACTAAAGGGGTATTCATTGGATATATAGTTTTAAATCAGGTTTTT…	MNEYNNDNMEQEKEKKKEEQKYKNIIKKEYFIFPRLYDKNKEIEYNKLRIHNIKEYICIHLTISLFIILIECFVFSFNLNIKDTTYVEICVVIFSILNCLMHIVVLIKMYFFTSESVYTKGVFIGYIVLNQVFQFLSLYFFTKRNEQSKNDIAHLKYYDNSFNLYVHFFVDSVFILCLPALSFFLSVLFMMMFLCLNILLINMIKFNKTNYGSDIYHICLLSVVLLMFLILRYMMEERNRLLFFFIKDMMFDNYKKWYSDYIGAHYDKDKDSTTINGDNNKYEKEKCEDYKFLFSNKCILFHDFTLNACYKDYYSMICFLNKLLKSCNIKEDMSSNTSVNINGDTYQNMNFHDNINSNIPKNYNSFYEELKKNLNESDILTIAYEVEVLKNIKKINCDE…	815	6	null	no	GO_0004114	GO_0004114, GO_0030552	GO_0004114,GO_0004114,GO_0030552	0	0	0	0	0	0	0	0	0	0	0	0	0	0	0	0	0	0	0	0	0	0	0	0	0	0	0	0	0	0	0	0	0	0	0	0	0
4099	PF3D7_1321500	3',5'-cyclic nucleotide phosphodiesterase, putative	PDEbeta	ATGGGTAAGGTAGAAGATTTTGAAGAACATAATAAAAATAGTAATCAAGATATTGAAAAGAATGTAGGGAATAGAAGAAGGTCTAATAGTAATACGATCAATGATCAAAATGAGAATATAAATAAAAATAAAGCTATAGTAACTAAAAAGAGTTTTATAATGAATTTATTACGAAATAAAGAAAAAACAAAGGTAGAACAAAATGATGATAATATAGTAGAAAATATGAATGAAAGGAAAAACAGTTTAAAAGATATGTCACTTATTAGTGATAATGTAGAAAAAGATAATAAAGTAAAAAAAAAAAATAGCTATTTAAAAAATTTAAATATTCTTGGTAAAACAAAATCTATAGAATTTTCATTTCCATCTAATATATTAAATAATGCACGTAAAAAT…	MGKVEDFEEHNKNSNQDIEKNVGNRRRSNSNTINDQNENINKNKAIVTKKSFIMNLLRNKEKTKVEQNDDNIVENMNERKNSLKDMSLISDNVEKDNKVKKKNSYLKNLNILGKTKSIEFSFPSNILNNARKNIQEIDEESPLTSNSLRTYKEGISEDNRQNQRNADNNSLNWSTSNINTECNSEFSNIEVKVLKTEKSNSVKLKDNIIDIPNDKNKKELQEINIKNTNKDSYKNLYLKVRNSISFNDNIKIDDENKNDKNNIIDNYNNYDDINSSNEITIDGLNHDDNIKKIDNINNFDNKHDDNLQDHHQNHVHHTFRSSRKSLGNIKSNNTNIKLNNDKNFDTNINKRSILEKYFYDIWKRNITIKKEIYSLSSKNPPNPLKSTFADACQNESSEK…	1139	6	null	no	GO_0004114	GO_0004117	GO_0004114,GO_0004117	0	0	0	0	0	0	0	0	0	0	0	0	0	0	0	0	0	0	0	0	0	0	0	0	0	0	0	0	0	0	0	0	0	0	0	0	0
4101	PF3D7_1321600	phosphodiesterase gamma, putative	PDEgamma	ATGTTCCATAGTAATAATAGTAATCTTTATAAAAAAAGGGATATGGTTAAAAATGTCTTTTCTCTTTTTTCCTTTACAAGTAATGTAGACGATAAAGCTATTAAATTATGGCCCTTAAAATTTATTGAGAAGGAAGAAGAATCTTTATATATTATAAAAATTTGTCATAATATTTACAAGAAAAGATTTTTTCTCCTCATAACACATCTGAGCTCTCTTATATTTATGTATTCCATATGTTTGATAGTAGCAAAAATTAATGAGCTATTTTCCAAGTTAAAATTCACGTTTATATTTTTACACATTTTTGTTGTAATTAATATATTATTCATTTTAATGTTGCACTATACACATTATGTAGAAAAACTTCGAAGGTGGAGAGGGAAATTATTTGTATTG…	MFHSNNSNLYKKRDMVKNVFSLFSFTSNVDDKAIKLWPLKFIEKEEESLYIIKICHNIYKKRFFLLITHLSSLIFMYSICLIVAKINELFSKLKFTFIFLHIFVVINILFILMLHYTHYVEKLRRWRGKLFVLHSICIFLLWCSWLFILFNDVKDYLPIVVNVNKFLYATYTHNKINIIFCFFAYVPIFYLITIIPCRICYSFTFDLLFFILRIAIFSVYYLITVKNYILIDNIFMIASSIVGSIFIFVIRYIIEIQRRLAFHSWNKQIKQINTLKSNLKEQKEKLSLTNIEEIFNLINDCIGNYCNTNEHLEEKNISVVNNLKKILTILKEDNLFSPDSKFLNRKKYNHIYAYIMDVNRNKTLSENKEPFKDVTEEFKEESETESLMESISEERSKTK…	769	6	null	no	GO_0004114	GO_0004117	GO_0004114,GO_0004117	0	0	0	0	0	0	0	0	0	0	0	0	0	0	0	0	0	0	0	0	0	0	0	0	0	0	0	0	0	0	0	0	0	0	0	0	0
4883	PF3D7_1430900	cytochrome c oxidase subunit 2, putative	COX2	ATGGATAAGATTAAAAGTTGGTTAGGATTTAATAAAAAGATCGTTTTTACAGAAAATAAATTTTTATTAAGAAATGTAAATGACCAAGAAAGTTTACAAGCAGAAAATGTAAGAGCAGAAGATTATCCAATACCTGAGAAATATTTAGAGGATCCAGATAAAATACCAAAGTATTACGTTTTTCAATCAAATATGGTAACAGATGAAGATTTACAACCTGGTATGTTAAGACAATTAGAAGTTGATAAAAGATTAACATTGCCTACAAGAACACATATATCTTTTCTAGTAACAGCTACTGATGTTATACATTCATGGTCTATTCCTAGTTTAGGAATAAAAGCTGATGCTATTCCGGGGCGCTTACATAAAATTACAACTTTTATATTAAGAGAAGGG…	MDKIKSWLGFNKKIVFTENKFLLRNVNDQESLQAENVRAEDYPIPEKYLEDPDKIPKYYVFQSNMVTDEDLQPGMLRQLEVDKRLTLPTRTHISFLVTATDVIHSWSIPSLGIKADAIPGRLHKITTFILREGVYYGQCSEMCGTLHGFMPIVVEAVSPEAYAAHAKKYYKE	172	0	null	no	GO_0005507, GO_0004129	GO_0004129	GO_0005507,GO_0004129,GO_0004129	0	0	0	0	0	0	0	0	0	0	0	0	0	0	0	0	0	0	0	0	0	0	0	0	0	0	0	0	0	0	0	0	0	0	0	0	0
2681	PF3D7_1021600	deoxyribose-phosphate aldolase, putative	DPA	ATGGCTAACTATGCAGAAACTTTTTCAGCATGGACAAGTATTTGCCTGACCGATCATACACTTTTAGGTGAAAATGACACAGAAGATGATATAAGAGAATTATGTGAGGAATCAGTTAAAACTTGTCCATTTGCAGCAGCTGTTTGCGTAAAGCCTGAATTTGTGAAATTTATAAACGACACAATAAAAAAAGAAATATGTCCATTTAAGCCGAAAGTTGCGTGTGTAATTAATTTTCCTCATGGAACTGATGTTGTTGAAAAAGTATTGGAAGATACAAAGAAGGTATTAGAGGACGGAGTTGATGAAATTGATTTAGTTATAAATTATAAAAAAGTTTTACAAAATGTTGAAGAAGGTTTAAAAGAAGCAACTGAATTAACAAAAAAAGTGAAAAAT…	MANYAETFSAWTSICLTDHTLLGENDTEDDIRELCEESVKTCPFAAAVCVKPEFVKFINDTIKKEICPFKPKVACVINFPHGTDVVEKVLEDTKKVLEDGVDEIDLVINYKKVLQNVEEGLKEATELTKKVKNLMKEKVLKVIIETGELKNDELIIKTTLAVLEGNADFVKTSSGKVPVNATPGAVKAIIEAMKQYVEKNPQKKDKIGLKVAGGVGDLNSASYYILLARRFLSALACHPNNFRIGSSSLVPKLRKIIAQNPAV	263	0	null	no	GO_0004139, GO_0016829	GO_0004139	GO_0004139,GO_0016829,GO_0004139	0	0	0	0	0	0	0	0	0	0	0	0	0	0	0	0	0	0	0	0	0	0	0	0	0	0	0	0	0	0	0	0	0	0	0	0	0
5010	PF3D7_1443700	dephospho-CoA kinase, putative	DPCK	ATGTTTTTAAAATTCTTTCTTGATAAATGTATTTTATGTTTCCTGGCTTTGGGTTCGATTCCAATTGGATATATAAATAGAAAGAATAAGTTTAGGAAAATTGAAAATCAGAAATATGCCTTATTCAGTTCTATAGTTATGAACAGTTTTTTAATATACCTAAATAAGTTTTTTGGAATATTAGGAATATTTAATTTTTTTTTAGGGAATTATTTATGTTTAATTGGAATAACAGGTGGTATAGCCGTTGGAAAATCAACTTTTTGTAATTTTTTAAAAAAAAAAGATGTGGTTGTAATAAATGCTGATGAAATTACTAGTAAGATTTATACAAAAGATTCTATATGCTATAAAAAAATTGTAAAACACTTTGGAGAAAATATTTTAAATAATGATAAA…	MFLKFFLDKCILCFLALGSIPIGYINRKNKFRKIENQKYALFSSIVMNSFLIYLNKFFGILGIFNFFLGNYLCLIGITGGIAVGKSTFCNFLKKKDVVVINADEITSKIYTKDSICYKKIVKHFGENILNNDKSINRTLLRKIVFNNEENVKYINKITHTYIILQIIKECLKYKFLYFKYNVAIEAPLLIETKLYLLTSPVILLKSSVRNQIKRILSRDKNCTYDTAMGIIKNQLPTDEKIKYADIIINNDGDILDLQMKCDVVYNKYLKNFFF	274	3	HMM: MFLKFFLDKCILCFLALGSIPI, NN: MFLKFFLDKCILCFLALGS	yes	GO_0005524, GO_0004140	GO_0004140	GO_0005524,GO_0004140,GO_0004140	0	0	0	0	0	0	0	0	0	0	0	0	0	0	0	0	0	0	0	0	0	0	0	0	0	0	0	0	0	0	0	0	0	0	0	0	0
5287	PF3D7_1471400	diacylglycerol kinase, putative	null	ATGAAGTACATTTTTTTGTTTGTTAATCCTACTTCGGGGGGAAACAAAGCCTCGATATTTACAGAATTTGGAGTAAATGAGATAATATTTCACAAACCTCACAAATGTCACTTTTTTATATACAACATTTTAGAAGGAGAGAAAGGAAAGAAGCCAGGATTTATTAACCTAAGTAATATTATGAATAATCATAATAAGTATGAAAGTAAGGGTTTTTCGGCTAGTTCGCTTAACAACAAAAGTTTTAGTATGACAAATGATAAGATAACATGTGGAAATGAAAAGAAAGAAATGGAAGGAGAGGGTATATTAAATGGATCTTCGAAAGTTGATGAAGAAGATAAAAATATATATAATAGTAAAAACAATAATAATAATATGAATTATTTTAATAATAAA…	MKYIFLFVNPTSGGNKASIFTEFGVNEIIFHKPHKCHFFIYNILEGEKGKKPGFINLSNIMNNHNKYESKGFSASSLNNKSFSMTNDKITCGNEKKEMEGEGILNGSSKVDEEDKNIYNSKNNNNNMNYFNNKKIETKKTLGHKDIFVYVLVAGGDGTVNWVLKEAEYYNINDNNFAIGVIPFGTGNDFAKAFGWKKIDRMLNHSFLFDVLKKIVDQTFKSKVEKHDYWNIHVVLKEQGYFNKINSRTKKKETLLNDDKENLHEMKLCMSNYFSIGIDSRIGRGFERHRQKSAVCNKFIYAVEGFKKVSFKKNTPINLIIDKMINMDNNNDNNDNDNNIDGNDNNNDGNDNNNVIFTTNHNESYPLLKKAMSIICINIPSYSSGNDIWNYTHKIGLILP…	499	0	null	no	GO_0003951, GO_0004143	GO_0004143	GO_0003951,GO_0004143,GO_0004143	0	0	0	0	0	0	0	0	0	0	0	0	0	0	0	0	0	0	0	0	0	0	0	0	0	0	0	0	0	0	0	0	0	0	0	0	0
575	PF3D7_0322300	diacylglycerol O-acyltransferase	DGAT	ATGAATAATAAAAATGATGAGGGACAAAAATTAAAACGTAAATCATTATATGAAAATTACCACAAAATTAATCAAACAAGTTTACTGTCACATAATTCATTAGAAATTGATATGAAAGGTTTTCTGAACTTATTAATTATAATAATATGTACTACACACTTTAGATTAATATTAGAAAATTTTAAAAAATATGGTTTAATTATAAAGATACCAAAGAATTGTGATTTAGTAAAAAACCTTCCACTTTTATTTTGCTTTATATCTTTGCATGTAACTATATTTTTTAGCTGGTTTATTGAAAGATATGTAACTTCCTGGTTATATACATGTATCGATGAAGACGACCAACACACTTTTAAAAATATCCCTATGGATGATCTGAGCAACAAAACAGATATG…	MNNKNDEGQKLKRKSLYENYHKINQTSLLSHNSLEIDMKGFLNLLIIIICTTHFRLILENFKKYGLIIKIPKNCDLVKNLPLLFCFISLHVTIFFSWFIERYVTSWLYTCIDEDDQHTFKNIPMDDLSNKTDMIIEKKNYKSLYPNLIRRKKKNNTINNDNENNNNNNNSNNNNSNNNNNSNNNNSNNNNNNNNNNYNNCLHKDPPSIYSYDSNTTYENEPYDKFDKDNSTYDKCDKDILCDKKDSKQTCNDICKKKLKELKNNNTEKNNNNNNNNNYINTCAHNIHTHIKDDDISTSSCLKKKKKKKVHGWKSFHLSIFLLRCINSIFILLFPLLTISYYDTEPTLSSILLTISIVWFFKFYSFHEVCYEARKLHIENVDLKNLIEDDLSSEMYYIKR…	653	9	null	no	GO_0008374, GO_0004144	GO_0004144	GO_0008374,GO_0004144,GO_0004144	0	0	0	0	0	0	0	0	0	0	0	0	0	0	0	0	0	0	0	0	0	0	0	0	0	0	0	0	0	0	0	0	0	0	0	0	0
4092	PF3D7_1320800	dihydrolipoyllysine-residue succinyltransferase component of 2-oxoglutarate dehydrogenase complex	null	ATGACAAAGAATCTTGTATTTCGATTAAATAAATCCTTATTACATCATGTCAAAAGTTTTAATAGAACATTTTTAAACCATAAGTATAATTCAAATGCAAATATTGAAGGATCACTTAAGAGATATTTTTCCATAGAAACCATTAAAGTACCTAGACTTGGTGATTCAATCACAGAAGGTACAATAAATGAATGGAAAAAAAAAGTGGGAGATTATGTTAAGGCGGATGAAACGATAACAATTATCGATACAGATAAAGTTAGTGTTGATATAAATTCTAAAGTAAGTGGAGGGTTATCCAAAATTTTTGCGGATGTAGGAGATGTTGTTTTGGTAGATGCACCTTTATGTGAAATTGATACATCTGTAGAACCACCTGAAGATATTTGTAAAACTAAA…	MTKNLVFRLNKSLLHHVKSFNRTFLNHKYNSNANIEGSLKRYFSIETIKVPRLGDSITEGTINEWKKKVGDYVKADETITIIDTDKVSVDINSKVSGGLSKIFADVGDVVLVDAPLCEIDTSVEPPEDICKTKEEVGESKNNENNYTFNQLNRDIKDEAHIKDEVSKNEKDIFVKDPICFGNDYESINERTERRVRMLPIRKRIAERLKESQNTCALLTTFNECDMSKAMLLRSELNDIFQKKYSCKLGFVSLFMYASTLALKKMPNVNAYIENDEIVYKNYIDISVAVATPNGLTVPVIRNCQNKNLPQLELALSDLATKARSNKLSIDDFSGGTFTISNGGVFGSMLSTPIINMPQSAILGMHTIKNRPVVVNNEIVIRPIMYLALTYDHRLLDGRE…	421	0	null	no	GO_0004149, GO_0016746	GO_0004149	GO_0004149,GO_0016746,GO_0004149	0	0	0	0	0	0	0	0	0	0	0	0	0	0	0	0	0	0	0	0	0	0	0	0	0	0	0	0	0	0	0	0	0	0	0	0	0
5302	PF3D7_1472900	dihydroorotase, putative	null	ATGAAAAATTACTTTTATATTCCAATAGCTGATGACATGCACTGTCACTTAAGGCAAGGCGACATGCTGGATTTTACGGTAAATTCCATTAGAAGAGGCGGCTGTAATCGTGTTTTAGTGATGCCGAACACGCATCCTATTATAAGTACTTGTAGTGATGCACAAAAATATTTATATCAACTGAAAAGTCGTGATGATGATATAGAATATTTAATGACCTTGTATTTGAATAAGAATACGGATGAAAACGATATATTAAGTAATTACTATAAGTGTAATTTACAAGGCGTAAAAATATATCCTAGTAATGTAACCACTAATTCGAGTGATGGTATTACTAGCCTAGAACCTTATTATAAGGTATTTCATGCACTAGAAAAATTAAATAAGAGTATACAT…	MKNYFYIPIADDMHCHLRQGDMLDFTVNSIRRGGCNRVLVMPNTHPIISTCSDAQKYLYQLKSRDDDIEYLMTLYLNKNTDENDILSNYYKCNLQGVKIYPSNVTTNSSDGITSLEPYYKVFHALEKLNKSIHIHCEEPNINPLYAEEKYLPHIHDLAIKFPGLNIVLEHISSSESINVIKEFRNVAGSITPHHLYLTIDDVVNMDIYDHAIDNTYIEKYIKNTYHYCKPLPKLLEDKIALQDVIKDDFPRVFLGSDSAPHYKVMKRKPYYKPGIYTQPFLINYVAHILNKFDALDKMENFTSKNASLFLNLAEKKKLAKYYICVEKHPFKLPREYNGVVPFLAGKTLDYDIHYVSKF	358	0	null	no	GO_0003824, GO_0004151	GO_0004151	GO_0003824,GO_0004151,GO_0004151	0	0	0	0	0	0	0	0	0	0	0	0	0	0	0	0	0	0	0	0	0	0	0	0	0	0	0	0	0	0	0	0	0	0	0	0	0
1174	PF3D7_0603300	dihydroorotate dehydrogenase	DHODH	ATGATCTCTAAATTGAAACCTCAATTTATGTTTTTACCAAAGAAACATATTTTAAGTTATTGTAGAAAGGATGTTTTAAATTTGTTTGAACAGAAGTTTTATTATACTAGCAAACGGAAAGAAAGTAATAATATGAAGAATGAATCTTTATTAAGATTAATTAATTATAATAGATATTATAATAAGATAGATTCTAATAATTATTATAATGGTGGAAAAATATTAAGTAATGATAGGCAATATATATATTCACCATTATGTGAATATAAAAAGAAAATAAATGATATATCATCATATGTATCTGTACCTTTTAAGATTAATATAAGAAATTTAGGTACTTCCAATTTTGTAAATAATAAGAAGGATGTACTTGATAATGATTATATTTATGAAAATATT…	MISKLKPQFMFLPKKHILSYCRKDVLNLFEQKFYYTSKRKESNNMKNESLLRLINYNRYYNKIDSNNYYNGGKILSNDRQYIYSPLCEYKKKINDISSYVSVPFKINIRNLGTSNFVNNKKDVLDNDYIYENIKKEKSKHKKIIFLLFVSLFGLYGFFESYNPEFFLYDIFLKFCLKYIDGEICHDLFLLLGKYNILPYDTSNDSIYACTNIKHLDFINPFGVAAGFDKNGVCIDSILKLGFSFIEIGTITPRGQTGNAKPRIFRDVESRSIINSCGFNNMGCDKVTENLILFRKRQEEDKLLSKHIVGVSIGKNKDTVNIVDDLKYCINKIGRYADYIAINVSSPNTPGLRDNQEAGKLKNIILSVKEEIDNLEKNNIMNDESTYNEDNKIVEKKNNF…	569	1	null	no	GO_0004152	GO_0004152	GO_0004152,GO_0004152	0	0	0	0	0	0	0	0	0	0	0	0	0	0	0	0	0	0	0	0	0	0	0	0	0	0	0	0	0	0	0	0	0	0	0	0	0
1860	PF3D7_0810800	hydroxymethyldihydropterin pyrophosphokinase-dihydropteroate synthase	PPPK-DHPS	ATGGAAACTATACAAGAACTAATACTTTCTGAGGAAAATAAAACTAATATTGCCGTATTAAACTTAGGAACAAATGATAGAAGAAACGCTGTGTTGATTCTAGAAACTGCTCTGCACCTTGTCGAAAAATATTTAGGAAAAATTATTAATACGTCCTACTTGTATGAAACCGTTCCAGAATACATTGTATTAGATAAAAAGGAAAGTTGCGAAAAAATAAACAAGGATTGTCGTATATATGATGTTAATTATATAAACGAATTGATGCAAAATTTAGAAGAATCTAAATATGAAGAGAATAAAGAATTAATTGATAAATGTGAAGAATATGAAACATTTTTGAAAAATGGAAAAGTTGATAATAGTATTCTAAAGGAAGTAAATGTAGAAAATTATTTA…	METIQELILSEENKTNIAVLNLGTNDRRNAVLILETALHLVEKYLGKIINTSYLYETVPEYIVLDKKESCEKINKDCRIYDVNYINELMQNLEESKYEENKELIDKCEEYETFLKNGKVDNSILKEVNVENYLLECNNIIVKNDEIMKNNLSKYKDKYYTSYFYNLTVVVKTFVNDPLSMLVVIKYIEELMKRENVKEKEKFENRIIDIDILFFNDFTIFMKNIKLEKNMIYKILSKYIHLERDIKNGNDNMSKVNMDKDINLNNNNNIKKKNNNDIDCDCVDQKMNNHVNNKNYINSFRDPQEIINNMVDNIEFLSIPHVYTTHRYSILLCLNDMIPEYKHNVLNNTIRCLYNKYVSRMKEQYNINIKENNKRIYVLKDRISYLKEKTNIVGILNVNY…	706	0	null	no	GO_0003848, GO_0004156	GO_0004156	GO_0003848,GO_0004156,GO_0004156	0	0	0	0	0	0	0	0	0	0	0	0	0	0	0	0	0	0	0	0	0	0	0	0	0	0	0	0	0	0	0	0	0	0	0	0	0
2549	PF3D7_1009000	diphthine methyl ester synthase, putative	DPH5	ATGGTGTTGTATATTATCGGTTTAGGTTTAGGGGATGAAAAAGATATAACAATAAAAGGTAAAGAATTAATCGAAAAATCGGATGTAGTGTATCTAGAAACATATACATCCATTTTATTTGTATCTAAAGATGTATTAGAAGAAACATATAAAAAAAGTATAGAGGAGGTAGATCGTGATTTTGCGGAAGAAAATTGTGATAAAATATTAGACGAAGCAAAAAACAAAAAGGTTTCTTTTCTTGTAGTTGGTGATCCTTTATGTGCTACTACTCATCACGATATAATTTTAAGAGCAAAGAAAAAAAATATTGACGTAGAAATTATACATAATACATCCATAATTTCAGCTATAGGGGAATGTGGTATGCAATTATATAATTTTGGTCAAATCGTTTCT…	MVLYIIGLGLGDEKDITIKGKELIEKSDVVYLETYTSILFVSKDVLEETYKKSIEEVDRDFAEENCDKILDEAKNKKVSFLVVGDPLCATTHHDIILRAKKKNIDVEIIHNTSIISAIGECGMQLYNFGQIVSIPYFEDNYKPTSYYDKIYINLKNNFHTLCLLDIKVKERTVENIMRNKKIYEPPRFMTINDSIEQLLYCEHIHKKNIITKNTLGIAIIQIGTDNQQIISGDLLTLKDISYNKPLHSLIICAPTLHDIEKEYFDLYHYNNMKK	274	0	null	no	GO_0004164, GO_0008168	GO_0004164	GO_0004164,GO_0008168,GO_0004164	0	0	0	0	0	0	0	0	0	0	0	0	0	0	0	0	0	0	0	0	0	0	0	0	0	0	0	0	0	0	0	0	0	0	0	0	0
3131	PF3D7_1127100	deoxyuridine 5'-triphosphate nucleotidohydrolase	dUTPase	ATGCATTTAAAAATTGTATGTCTGAGTGATGAGGTCAGAGAAATGTACAAGAATCATAAAACACATCATGAAGGTGATAGTGGATTAGATTTGTTTATTGTAAAAGATGAAGTACTGAAGCCAAAGTCCACAACTTTTGTTAAGCTTGGAATTAAGGCAATAGCATTACAATATAAATCTAATTATTATTATAAATGTGAAAAATCGGAAAATAAAAAAAAAGATGATGACAAATCCAATATTGTAAATACGAGCTTTTTATTATTTCCTCGTAGCAGTATATCCAAAACCCCATTACGCTTAGCTAATTCAATTGGACTAATTGATGCAGGTTATAGAGGAGAAATTATTGCCGCCTTGGATAATACTAGTGACCAAGAGTATCACATTAAAAAAAAT…	MHLKIVCLSDEVREMYKNHKTHHEGDSGLDLFIVKDEVLKPKSTTFVKLGIKAIALQYKSNYYYKCEKSENKKKDDDKSNIVNTSFLLFPRSSISKTPLRLANSIGLIDAGYRGEIIAALDNTSDQEYHIKKNDKLVQLVSFTGEPLSFELVEELDETSRGEGGFGSTSNNKY	173	0	null	no	GO_0016787	GO_0004170	GO_0016787,GO_0004170	0	0	0	0	0	0	0	0	0	0	0	0	0	0	0	0	0	0	0	0	0	0	0	0	0	0	0	0	0	0	0	0	0	0	0	0	0
522	PF3D7_0317000	proteasome subunit alpha type-3, putative	null	ATGGCTGGACTTAGTGCTGGGTATGATTTATCCGTGTCAACTTTTTCTCCAGACGGTCGTTTGTATCAGGTTGAATATATTTATAAATCAATAAATAATAACAACACAGCTTTATGTTTAGAATGTAAGGATGGAATAATATGTTGTTGTATAAATTCAAATATGGATAAGAATAAGATGATTAAAAAAAATAGTTATAATAGAATATATCATGTCAATAATAATATTATAATAACATATTCAGGATTTGATGGAGATGCAAGAAATATAATAGATAGAGCAAGAAGTGAAGCAAATACTTATTATTATAATTTCCATACAAACATACCATTACATATTTTAGTAAACAGAATTTCTTTATATATCCATGCGTATACATTATATTGGCACATGAGACCT…	MAGLSAGYDLSVSTFSPDGRLYQVEYIYKSINNNNTALCLECKDGIICCCINSNMDKNKMIKKNSYNRIYHVNNNIIITYSGFDGDARNIIDRARSEANTYYYNFHTNIPLHILVNRISLYIHAYTLYWHMRPFAASIIISSFNEKDKGDIYCIEPNGACYKYSGIVIGKNKEMFKTEIEKKDYKDINVRDAIEDIYKFILTSDDHMNKNNLQNLVNFSWICKESSYEFQNIHEEILTPALNKAVEYIEKLN	252	0	null	no	GO_0004175, GO_0004298	GO_0004175	GO_0004175,GO_0004298,GO_0004175	0	0	0	0	0	0	0	0	0	0	0	0	0	0	0	0	0	0	0	0	0	0	0	0	0	0	0	0	0	0	0	0	0	0	0	0	0
1227	PF3D7_0608500	proteasome subunit alpha type-2, putative	null	ATGGCAGATGGTGAATATAGTTTTTCTTTAACAACTTTTAGTCCAACAGGAAAATTAGTACAAATTGAATATGCTCTTAATAGAGTATCTAGCAGTTCGCCAGCTTTAGGTATTAGAGCCAAGAATGGTGTGATAATTGCTACCGAAAAGAAAAGTCCAAATGAATTAATAGAAGAAAATAGCATATTCAAAATACAACAAATAAGTGAACATATAGGTATTGTATATGCAGGAATGCCTGGAGATTTCCGTGTATTATTAAAAAGGGCAAGAAAAGAAGCCATAAGATATTCTTTACAATATGGAAGTGAAATATTAGTAAAAGAATTAGTAAAAATAATTGCATCAATAGTTCAAGAATTTACACAAACAGGTGGGGTAAGACCATTTGGTTTATCT…	MADGEYSFSLTTFSPTGKLVQIEYALNRVSSSSPALGIRAKNGVIIATEKKSPNELIEENSIFKIQQISEHIGIVYAGMPGDFRVLLKRARKEAIRYSLQYGSEILVKELVKIIASIVQEFTQTGGVRPFGLSLLICGVDVYGYHLYQIDPSGCYFNWMATCVGKDYQNNMSFLEKRYNKDIEIEDAIHTAILTLKESYEGVLNEKNIEIGVAYDNKPFKILTQNEIKDYLIEIE	235	0	null	no	GO_0004175, GO_0004298	GO_0004175	GO_0004175,GO_0004298,GO_0004175	0	0	0	0	0	0	0	0	0	0	0	0	0	0	0	0	0	0	0	0	0	0	0	0	0	0	0	0	0	0	0	0	0	0	0	0	0
1710	PF3D7_0727400	proteasome subunit alpha type-5, putative	null	ATGTTTTCAACAAGGAGTGAATATGATAGGGGAGTAAATACCTTTTCTCCTGAAGGACGACTTTTTCAAGTTGAATATGCCTTAGGGGCGATAAAACTTGGTAGTACGGCTGTAGGTATTTGTGTGAACGATGGAGTGATATTAGCATCCGAGAGAAGAATTTCCTCAACACTTATCGAAAAAGATTCCGTTGAGAAATTATTATCGATAGATGATCATATTGGTTGTGCGATGAGTGGTTTGATGGCTGATGCAAGAACATTAATTGATTATGCAAGAGTCGAGTGTAATCATTATAAATTTATTTATAATGAGAATATAAATATAAAGTCATGTGTAGAACTAATATCTGAATTAGCTTTAGATTTTTCTAATTTGTCTGATAGTAAAAGAAAAAAG…	MFSTRSEYDRGVNTFSPEGRLFQVEYALGAIKLGSTAVGICVNDGVILASERRISSTLIEKDSVEKLLSIDDHIGCAMSGLMADARTLIDYARVECNHYKFIYNENINIKSCVELISELALDFSNLSDSKRKKIMSRPFGVALLIGGVDKNGPCLWYTEPSGTNTRFSAASIGSAQEGAELLLQENYKKDMTFEQAEILALTVLRQVMEDKLSTSNVEICAIKKSDQTFYKYNTDDISRIIDVLPSPVYPTIDMTA	256	0	null	no	GO_0004175, GO_0004298	GO_0004175	GO_0004175,GO_0004298,GO_0004175	0	0	0	0	0	0	0	0	0	0	0	0	0	0	0	0	0	0	0	0	0	0	0	0	0	0	0	0	0	0	0	0	0	0	0	0	0
1830	PF3D7_0807500	proteasome subunit alpha type-6, putative	null	ATGGTAAGGCCTTCACAGAGTATGTATGATAGACACTTGACGATTTTTTCTCCAGATGGGAATTTATATCAAATAGAATATGCTATAAAAGCAGTAAAAAATACAAATATAACCTCCGTAGGAGTAAAGGGAGAAAATTGTGCTGTAATAATTTCCCAAAAGAAAATGGCTACACAATATATTTCTCAAGATAAATTATTAGATTATAATAACATAACTAATATATATAATATAACAGATGAAATAGGATGCTCAATGGTAGGTATGCCAGGAGATTGTTTAAGTATGGTTTATAAAGCTAGATCAGAAGCATCCGAATTTTTATATAGTAACGGATATAATGTAAATGCCGAAACGTTATGTAGAAATATTTGTGATAAAATACAAGTGTATACACAA…	MVRPSQSMYDRHLTIFSPDGNLYQIEYAIKAVKNTNITSVGVKGENCAVIISQKKMATQYISQDKLLDYNNITNIYNITDEIGCSMVGMPGDCLSMVYKARSEASEFLYSNGYNVNAETLCRNICDKIQVYTQHAYMRLHACSGMIIGIDENNKPELFKFDPSGFCAGYRACVIGNKEQESISVLERLLEKRKKKIQQETIDEDIRNTTILAIEALQTILAFDLKASEIEVAIVSTKNRNFTQISEKEIDNYLTYIAERD	260	0	null	no	GO_0004175, GO_0004298	GO_0004175	GO_0004175,GO_0004298,GO_0004175	0	0	0	0	0	0	0	0	0	0	0	0	0	0	0	0	0	0	0	0	0	0	0	0	0	0	0	0	0	0	0	0	0	0	0	0	0
4412	PF3D7_1353800	proteasome subunit alpha type-4, putative	null	ATGGCAAGAAGATATGATAGTAGAACAACTACCTTTTCTCCAGAAGGAAGGTTATATCAAGTAGAATATGCTTTGGAAGCCATAAATAATGCAAGTATAACAATTGGTTTAATAACAAAGGATGGAGTAATATTAGGAGCGGATAAAGTTTTTATTTCAAAATTAATTGATAAAGCTAATAATTATGAAAAAATATATAAAATTGATAAACACATATTTTGTGGTGTAGCAGGATTGAATGCTGACGCAAATATTTTAATAAACCAATCTAGATTATATGCACAAAGATATTTATATAATTATAATGAAGTACAACCAGTATCACAATTAGTAGTTCAAATATGTGATATCAAGCAAAGTTACACACAATATGGTGGATTAAGACCATATGGTGTTAGC…	MARRYDSRTTTFSPEGRLYQVEYALEAINNASITIGLITKDGVILGADKVFISKLIDKANNYEKIYKIDKHIFCGVAGLNADANILINQSRLYAQRYLYNYNEVQPVSQLVVQICDIKQSYTQYGGLRPYGVSFLIGGYDTKDGYQLYHTDPSGNYSGWFATAIGTNNLTASSVLKQEWKNDMTLEEGLLLALKTLAKSTDTEIPKSEKIELAYLTNKDGEVYQKYLTEKEIEELIKLYTQKYIKE	246	0	null	no	GO_0004175, GO_0004298	GO_0004175	GO_0004175,GO_0004298,GO_0004175	0	0	0	0	0	0	0	0	0	0	0	0	0	0	0	0	0	0	0	0	0	0	0	0	0	0	0	0	0	0	0	0	0	0	0	0	0
4413	PF3D7_1353900	proteasome subunit alpha type-7, putative	null	ATGTCTTATGATAGAGCTATAACAGTTTTTAGTCCTGATGGACATTTGCTACAAGTAGAACATGCCTTAGAAGCAGTTAAAAAAGGTGGTTGTGCTGTAGCTATAAAAAGTTCAAATTTCGCTGTTTTAGCAGTCGAAAAAAAGAATATACCTAAATTACAAAACCCAAAAACTACTGAAAAATTGATTAAATTAGATGAACATAATTGTTTAGCCTTTGCTGGTTTAAATGCTGATGCAAGAGTATTAGTCAATAAGACTCGATTAGAATGCCAAAGATATTATTTAAATATGGATGAACCGGCACCTGTAGATTATATTGCAAAATATGTTGCAAAAGTACAACAGAAATTTACACATAGGGGTGGTGTAAGACCATTTGGTATAGCCACACTAATA…	MSYDRAITVFSPDGHLLQVEHALEAVKKGGCAVAIKSSNFAVLAVEKKNIPKLQNPKTTEKLIKLDEHNCLAFAGLNADARVLVNKTRLECQRYYLNMDEPAPVDYIAKYVAKVQQKFTHRGGVRPFGIATLIAGFKNNKEICIYQTEPSGIYAAWKAQAIGKNAKIVQEFLEKNYQENMEQKDCIFLALKAIFEVVELSSKNVEVALLTEKDLTFIEEQEINSMVELIDQERTKNNEQNE	241	0	null	no	GO_0004175, GO_0004298	GO_0004175	GO_0004175,GO_0004298,GO_0004175	0	0	0	0	0	0	0	0	0	0	0	0	0	0	0	0	0	0	0	0	0	0	0	0	0	0	0	0	0	0	0	0	0	0	0	0	0
5320	PF3D7_1474800	proteasome subunit alpha type-1, putative	null	ATGTATCGAAATTTATATGATACAGACAATATAATTTACTCTCCAGAAGGAAGATTGTACCAAGTAGAATATGCAAGTGAAGCAATAAAACAAGGAACATGTGCAGTAGCTATAAAGTCAAAGGATTATGTGGTTGTGAGTGGATTAAAGAAATGCATTAGTAAATTATCTTTTCCTCAAGAGAAGATATTTAAAATTGATGATTATATTGGTATTAGTATGAGTGGAATTACTTCTGATGCTAAGGTTTTAACAAAATTTATGCAGAATGAATGTTTATCTCATAAATTTTTATATAATGAAAATATAAATATTGAATCCTTAGTAAGAAGTGTAGCAGATAAATATCAGAAGAATACACAAAAAAGTAGTAAGAGAGCATTTGGAGTAGGGTTAATG…	MYRNLYDTDNIIYSPEGRLYQVEYASEAIKQGTCAVAIKSKDYVVVSGLKKCISKLSFPQEKIFKIDDYIGISMSGITSDAKVLTKFMQNECLSHKFLYNENINIESLVRSVADKYQKNTQKSSKRAFGVGLMIAAYHNEPCIFETRPNGSYFEYDALSFGARSHASKTYLEKNLHLFEECSLEELILHCLKALKCSLSSESELTISNTALAVVGKNHPWQEISSLQLEEYLSKVKMDAEQEQVEENVQNEANE	254	0	null	no	GO_0004175, GO_0004298	GO_0004175	GO_0004175,GO_0004298,GO_0004175	0	0	0	0	0	0	0	0	0	0	0	0	0	0	0	0	0	0	0	0	0	0	0	0	0	0	0	0	0	0	0	0	0	0	0	0	0
72	PF3D7_0108000	proteasome subunit beta type-3, putative	null	ATGGGGTCTATATATAATTATAATGGTGGTTGCGTTTTAGGAATGAGTGGATCAAATTGTGTCGCGATAGCATGTGATTTGAGATTAGGAGCAAATACATTTACAACCGTTAGTACAAAATTTAGTAAGATTTTCAAGATGAATAATAATGTATATGTAGGATTAAGTGGATTAGCTACTGATATACAAACGTTATATGAAATATTAAGATATCGTGTTAATTTATATGAAGTTAGGCAAGATGCAGAAATGGATGTTGAATGTTTTGCAAATATGTTATCGAGCATACTATATTCTAATAGATTCTCTCCTTATTTTGTTAATCCTATAGTTGTTGGATTTAAACTTAAACATTATGTAGATGAAGAAGGAGAAAAGAAAGTTAATTATGAACCTTAT…	MGSIYNYNGGCVLGMSGSNCVAIACDLRLGANTFTTVSTKFSKIFKMNNNVYVGLSGLATDIQTLYEILRYRVNLYEVRQDAEMDVECFANMLSSILYSNRFSPYFVNPIVVGFKLKHYVDEEGEKKVNYEPYLTAYDLIGAKCETRDFVVNGVTSEQLFGMCESLYVKDQDENGLFETISQCLLSALDRDCISGWGAEVLVLTPEKIIKKKLKARMD	218	0	null	no	GO_0004298	GO_0004175	GO_0004298,GO_0004175	0	0	0	0	0	0	0	0	0	0	0	0	0	0	0	0	0	0	0	0	0	0	0	0	0	0	0	0	0	0	0	0	0	0	0	0	0
1009	PF3D7_0518300	proteasome subunit beta type-1, putative	null	ATGGATCTTATATTATATAATGACAATTTAACAGAAAAGAAAACAGAGAAGGAAAATGTAATAGAGCATGGTCGTGGTTTTAAAAGATGGTATCCATATATTGACAATGGAGGAACTGTCATTGGCTTAACTGGTAAAGATTATGTTATTTTAGCTGCAGATACAAGATTATCTTTATCATATTCAATATATACAAGATTCTGCCCAAAGATATCTAAATTGACTGATAAGTGTATTATAGGTTCCTCAGGAATGCAGTCTGATATAAAAACACTCCATTCATTATTACAAAAAAAAATTCAATTGTTTGTTTTGGAACACTCCCATTATCCAGACATTCATGTTATAGCTAGATTGTTGTGTGTAATATTATATAGTAGAAGATTTTTCCCGTATTAT…	MDLILYNDNLTEKKTEKENVIEHGRGFKRWYPYIDNGGTVIGLTGKDYVILAADTRLSLSYSIYTRFCPKISKLTDKCIIGSSGMQSDIKTLHSLLQKKIQLFVLEHSHYPDIHVIARLLCVILYSRRFFPYYAFNILAGVDENNKGVLYNYDSVGSYCEATHSCVGSGSQLILPILDNRVEQKNQLIKNTNFNLGDDINFVKDAITSATERDIYTGDKTLIYVIDKMGINVNTLDLKQD	240	0	null	no	GO_0004298	GO_0004175	GO_0004298,GO_0004175	0	0	0	0	0	0	0	0	0	0	0	0	0	0	0	0	0	0	0	0	0	0	0	0	0	0	0	0	0	0	0	0	0	0	0	0	0
1796	PF3D7_0803800	proteasome subunit beta type-4	null	ATGACCTTAGGCCCAGTAGTAACAGGTACATCCGTGATAGCTATAAAATACAAACACGGCATAATGATTGCAGCAGATAGAAAAGCTAGCTATGGTAGTTATGCAAAATTTCAGAATGTCGAAAGAATTTTTAAAATAAATAATAAGACGGTTATGGGTTTTAGTGGTGAGCTAGCTGATGCTCAATATTTGCATGAGTTACTTACACGTAAGAATATTAATAATTTAAGTGAGAAGAAAAGAAAAGAAGATATGTATACACCCCAACATTACCATTCGTATGTAAGTAGAGTATTTTATGTTAGAAAAAATAGGATAGATCCCTTATTTAATAATATAATTATAGCAGGAATAAATTCACAAAAATATGATAATAATGATGATAATGTTTTATTATAT…	MTLGPVVTGTSVIAIKYKHGIMIAADRKASYGSYAKFQNVERIFKINNKTVMGFSGELADAQYLHELLTRKNINNLSEKKRKEDMYTPQHYHSYVSRVFYVRKNRIDPLFNNIIIAGINSQKYDNNDDNVLLYTNKNNDDEQNEYKNNEEYKEIHKDDLYIGFVDMHGTNFCDDYITTGYARYFALTLLRDHYKDNMTEEEARILINECLRILYFRDATSSNFIQIVKVTSKGVEYEEPYILPCVLNSADYVYPSTLLPPAGCMW	265	0	null	no	GO_0004298	GO_0004175	GO_0004298,GO_0004175	0	0	0	0	0	0	0	0	0	0	0	0	0	0	0	0	0	0	0	0	0	0	0	0	0	0	0	0	0	0	0	0	0	0	0	0	0
2574	PF3D7_1011400	proteasome subunit beta type-5	null	ATGGTAATAGCAAGTGATGAAAGCTTTATGAATGAAATTGATAATTTAATAAATGATGTGGAAGATGAAAGAATAGATAATGATGAATTAGAGTTTTGTGTAGCTCCAGTGAATGTACCAAGAAATTTTATAAAATATGCACAAACTCAAAATAAGAAATTATTTGATTTTCATAAAGGTACTACAACTTTAGCATTTAAATTTAAAGATGGGATAATAGTTGCAGTAGATTCCCGAGCATCTATGGGATCTTTTATATCTTCACAGAATGTTGAAAAGATTATTGAAATAAATAAAAATATATTAGGAACAATGGCAGGAGGAGCTGCTGATTGCTTATATTGGGAAAAATATTTAGGTAAAATAATAAAGATTTATGAATTAAGAAATAACGAAAAA…	MVIASDESFMNEIDNLINDVEDERIDNDELEFCVAPVNVPRNFIKYAQTQNKKLFDFHKGTTTLAFKFKDGIIVAVDSRASMGSFISSQNVEKIIEINKNILGTMAGGAADCLYWEKYLGKIIKIYELRNNEKISVRAASTILSNILYQYKGYGLCCGIILSGYDHTGFNMFYVDDSGKKVEGNLFSCGSGSTYAYSILDSAYDYNLNLDQAVELARNAIYHATFRDGGSGGKVRVFHIHKNGYDKIIEGEDVFDLHYHYTNPEQKDQYVM	271	0	null	no	GO_0004298	GO_0004175	GO_0004298,GO_0004175	0	0	0	0	0	0	0	0	0	0	0	0	0	0	0	0	0	0	0	0	0	0	0	0	0	0	0	0	0	0	0	0	0	0	0	0	0
4166	PF3D7_1328100	proteasome subunit beta type-7, putative	null	ATGAAACTCGAATATATAAATATACTCAAAGAAGAAAACGGAGGATATAATTTTGATAACTTAAAAAGAAATGAAATATTAAAAGAAAAGGGAGTAAAGTTTCCACAATTTCGAAAAACAGGAACAACAATCTGTGGATTGGTTTGCCAAAATGCAGTTATTTTGGGTGCCGATACAAGAGCTACGGAGGGACCAATAGTAGCTGATAAAAATTGTAGTAAATTACATTATATAAGTAAAAATATATGGTGTGCAGGTGCAGGTGTAGCAGGAGATTTAGAACATACAACTTTATGGTTACAACATAATGTCGAATTACATCGTTTAAATACAAATACACAACCAAGAGTATCCATGTGTGTATCAAGATTAACTCAAGAATTATTTAAATATCAAGGA…	MKLEYINILKEENGGYNFDNLKRNEILKEKGVKFPQFRKTGTTICGLVCQNAVILGADTRATEGPIVADKNCSKLHYISKNIWCAGAGVAGDLEHTTLWLQHNVELHRLNTNTQPRVSMCVSRLTQELFKYQGYKVCAIVLGGVDVNGPQLYGIHPHGSSCLLPFTALGSGSLNAMAVLEAKYRDNMTIEEGKNLVCEAICAGIFNDLGSGGNVDICVITKDSYQHIRPYKEPNMRLYHLPHPTIYPKGTTPILSEKIEYIKKFISVEDA	270	0	null	no	GO_0004298	GO_0004175	GO_0004298,GO_0004175	0	0	0	0	0	0	0	0	0	0	0	0	0	0	0	0	0	0	0	0	0	0	0	0	0	0	0	0	0	0	0	0	0	0	0	0	0
5282	PF3D7_1470900	proteasome subunit beta type-2, putative	null	ATGGATACGTTGATTGGTTTAAGAGGAAACAATTTCGTAGTCCTGGCTGCTGATACATATAGCATAAATTCAATAATTAAATTAAAAAATGATGACAACACAAAATTTTATGATATACATGGAAATAAATGTTTATTACTAGGAGGTTCGATAGGAGACAGATTACAATTTGGAGAATTCATTCGTAAAAATGTGCACTTGTATCAGTATCAAAATAATACAGATATGTTTGTTAAAAGTTTTGCTTTTTTTACAAGAAAAAATTTGGCTTACTACTTGAGAAGAAACCCTTTTGAAGTTAATTGTCTGATAGCTGGATATGATAAGAAGGATGGATATCAACTATACTGGTGTGATTATTTAAGTAATATGGATTCTGTTAATAAAGGTGCTCATGGA…	MDTLIGLRGNNFVVLAADTYSINSIIKLKNDDNTKFYDIHGNKCLLLGGSIGDRLQFGEFIRKNVHLYQYQNNTDMFVKSFAFFTRKNLAYYLRRNPFEVNCLIAGYDKKDGYQLYWCDYLSNMDSVNKGAHGYGAYLVSAILDKYYHENLTVDEALDIFKLCFEELKKRFLLTQINYELRIMYDNKVETQYVTV	195	0	null	no	GO_0004298	GO_0004175	GO_0004298,GO_0004175	0	0	0	0	0	0	0	0	0	0	0	0	0	0	0	0	0	0	0	0	0	0	0	0	0	0	0	0	0	0	0	0	0	0	0	0	0
5236	PF3D7_1466300	26S proteasome regulatory subunit RPN2, putative	RPN2	ATGAGATTTGAAAATCAGTTTAGTAAACATGATATCGTTACGTCCGCCAGTGGTGTAATAGCATTATTAAATGAAGAAGAAACAAGTTTAAAGCTTTTTGGTCTAGAAAAATTAAATGCAATAGTAGATGTATATTGGCCAGAACTCGCTGATTCTATATTTAAGATAGAAGAATTATGTGAAGATGAAGATTTTGTTGGTAGAGAATTAGCTAATTTATTGGCAAGCAAAATATATTTTCATTTAGAAAAATATTCAGAAGCTTTAAAATATGCATTGTGTGCTGGTAAATTATTTAATATTAAAGAAAAATCACAATATGTTGAGACCATGTTAGCGAAATGTATAGAGAAATATGTCGAAATCAGAGAAATGCAATATGACATAGATTATAACAAT…	MRFENQFSKHDIVTSASGVIALLNEEETSLKLFGLEKLNAIVDVYWPELADSIFKIEELCEDEDFVGRELANLLASKIYFHLEKYSEALKYALCAGKLFNIKEKSQYVETMLAKCIEKYVEIREMQYDIDYNNQHNINDGITNNNDIFNAYNNNDLVELNSHNELLNKETDIFRFDINNEINQKMELLVDEMIDVCIKSNDIKEALGVALDARRLDKVEYIIANAENKIEILAHSINNEKHINMNKSFRNEYFKLLVNLYLSLSEEELKTEYINLCECLYYIDDYKKVAEILLKLLHNYHLMAYQISFDLVDFENKIFLRNILGQIKENLIQNKAYYFGEEYFVTTPQEENNDADNKENESNAITNEQQDENNNEKEDKDNNDGKNPEHNDDNNKPNDN…	1172	0	null	no	GO_0005488, GO_0030234	GO_0004175	GO_0005488,GO_0030234,GO_0004175	0	0	0	0	0	0	0	0	0	0	0	0	0	0	0	0	0	0	0	0	0	0	0	0	0	0	0	0	0	0	0	0	0	0	0	0	0
2643	PF3D7_1017900	26S proteasome regulatory subunit p55, putative	RPN5	ATGGATGATAATACAGCTAACATAATTGGATCTCATGATAATATTTTAACAGACCCAAGGATAGCACAAGATTGTAGTGCTGAGACGAATGAACTGTTAAACAAAGCAGAACAGTATTACAAGGTTGGAGAACTTGATGTTATGGTTGAGGAACTTATATCGTTAGAAAAGAAATGCAGACAATCATATGATGGAATATCTACTAGTAAGATATGTTGTTTTATTTTGAATAAATATAAAGAGGTTGGTAACTATAGTAAGGTTAATGAATATCTTATATTTTTTAACAAAAAAAGAGGGCAATTAAAAAGAACGATAATAGATATAATAAATTTATGTAAAGGTTGGATAGAAGATATACAAAATAAAGAAGAGAAATTAAATTTAATAAATACCTTG…	MDDNTANIIGSHDNILTDPRIAQDCSAETNELLNKAEQYYKVGELDVMVEELISLEKKCRQSYDGISTSKICCFILNKYKEVGNYSKVNEYLIFFNKKRGQLKRTIIDIINLCKGWIEDIQNKEEKLNLINTLCLVSEGKIFVEVERSEVIRMLSKIKEEDGNIEEAANILQDVQVETFISMNKRDKTEYILEQMRLVLLRKDFIRCHVISRKINPSLLNTEEFADLKLKYYMYMIQYYINEESYLDVAKCYEERFHTDIVLNDRNLWIDEMKCYIIFLILSPYDEQQNKLSNLLKMQKKKLKEIPIYQNLVQDFIEQDLIQWPLPYQQELFNFFIFDDSIFLGGQNRKDLFKKKVMHHNIHVISNCYDQISLNRLAQLLNASIEDSENLLSELVSAKF…	467	0	null	no	GO_0005515	GO_0004175	GO_0005515,GO_0004175	0	0	0	0	0	0	0	0	0	0	0	0	0	0	0	0	0	0	0	0	0	0	0	0	0	0	0	0	0	0	0	0	0	0	0	0	0
2770	PF3D7_1030500	26S proteasome regulatory subunit RPN9, putative	RPN9	ATGGGGGAAAGCGATAAATATAATCATATTAATCAATATCTAAACGAAAATGAAGAAATTCTTTTGAAAGAATTAAAGGGTAAATACGAATTTATGGATATGGAAGAAATAAAGAATTACAAAGAGAAGAAACTTCATCATGAATTAACTTTAGAAGTTCAAAAGTTTGTTAATAACAAAGATGTGGAATTAATAGATAAGTTTCGTTTATTTTATACGTATTTATCACCATTAATAACCAAATTAAAAAAAACTATATATGCTGAATTATTATATATAGTAACAGTAGATTTTGATACAAATTGGACAATAGAATATGTAAAAGAATCTGAAAAGAATTTAGAAAATGACAAGGATGCGATAATAATATATAGATGTATATTAATATTAAAATATATA…	MGESDKYNHINQYLNENEEILLKELKGKYEFMDMEEIKNYKEKKLHHELTLEVQKFVNNKDVELIDKFRLFYTYLSPLITKLKKTIYAELLYIVTVDFDTNWTIEYVKESEKNLENDKDAIIIYRCILILKYIKLEDYKNCEAEIENAKNMLQGVIGLNVVAHKFYNYALMCYYKALKKSDLYVKYALLYLAYTPLNDLNDYDRIDIGTYICIHSIISENVYNIGEIIQLPLINVCIKNNEETNWLYELIYIYNEGNIDSFNETIGKYQSNIENCILKNYQHNMLKKMTLLALMDLAFKKKKQREDISFHEIAQHCKIDINEVEKMLITAKSKNIITCKIDEIQKTVKITWVKPRVLNNEKIYFMKESIDKWINNSKNLITYMEDLSVELLIS	393	0	null	no	GO_0005515	GO_0004175	GO_0005515,GO_0004175	0	0	0	0	0	0	0	0	0	0	0	0	0	0	0	0	0	0	0	0	0	0	0	0	0	0	0	0	0	0	0	0	0	0	0	0	0
3152	PF3D7_1129200	26S proteasome regulatory subunit RPN7, putative	RPN7	ATGGAAGATAATAAAGAAGAAAATTGTGAACTGAATAAGAACAGTTATCCAAATTTTCACCTAGCAGATTTATTTTATCTTTTACAATTACCTAATATATCAATAAATGAAAGGAATGATTTATTACAATCTCTTTTTGATGAAATAAAAAAAAATCATATGTATCCATATTATAATTATATATGTCAAGAATTAAATTTAAATTTCGATGAAGAATATTTTAAAAGTTTAAAAGAAAAAGCAGATGAAGAATTAAACCAAATAGAAAATAAACTGTCCGAGTCAGCTGAAAATTTTGATTCCTTAGATAATAAAAATGATGTTTTACTGAAGGCAAATTTTTTCTGTAAGATAAGTGATAAGGAAAATGCCTTTAAGGAATATGAGGAAACTTATAAG…	MEDNKEENCELNKNSYPNFHLADLFYLLQLPNISINERNDLLQSLFDEIKKNHMYPYYNYICQELNLNFDEEYFKSLKEKADEELNQIENKLSESAENFDSLDNKNDVLLKANFFCKISDKENAFKEYEETYKKGIGMGMKLDILLTMIRICIFYNDVKNLKKYLEQARTQMEKGGDWERKNKLKIYEALNYIMIRNFAEASKILIDAASTFTATEIISYEKIIFYVVILGIMTEERTVLDKKILNSSVILQITSSDEDLHTYLHSFYHCDYRTFMEKTIKIAMRVKRDRYLGRHYRYFIRNTRVRAYKQFLEPFKNVTLKNMAFAFGVSEEFIENEISSFIANGKLNCKIDKVNGSIESNQPNERNTMYQNTIKKGDILLNRIQKLSRVIDM	393	0	null	no	GO_0005515	GO_0004175	GO_0005515,GO_0004175	0	0	0	0	0	0	0	0	0	0	0	0	0	0	0	0	0	0	0	0	0	0	0	0	0	0	0	0	0	0	0	0	0	0	0	0	0
4607	PF3D7_1402300	26S proteasome regulatory subunit RPN6	RPN6	ATGGATAACTTTGAAGAAATCGAAAGAGGTTACAAAGAAATAGAAGATGAAATAATAAAAACGATTGAGGATTTATGCGGTGGTAATTACTTAAAGATAAAGGATGAGGTGATTATGCCACATATGAGCGATGAGTTGATTAATAAGATAAAAATATTGAATAAGCATATAAATGATAAGAGTAACGAAGAATTATTTGAGAAAAGGGTTACGAATGAGAAGGTGATGCAAATAAATGACAAGTTGATATATTTATTATGTGATTATTATATTAATAAGAAAGAGATAGATAAATTGATTGAGTTTACTACAAGTAATGAGAATTATTTTAATATATTACCACAAGCAAAAACGGCTAAATTGATTAGGAATATTGTTGAGAAGATATCTAAAAAGATA…	MDNFEEIERGYKEIEDEIIKTIEDLCGGNYLKIKDEVIMPHMSDELINKIKILNKHINDKSNEELFEKRVTNEKVMQINDKLIYLLCDYYINKKEIDKLIEFTTSNENYFNILPQAKTAKLIRNIVEKISKKIRNISTLYIIFKKYMNWAYEKKRNFLRCRIEVKIIILYIIKQKYKTALSLIDRLLKEVKKVDDKTLLLELYIVQTKIYMLLKNSTKMKASLTFAKNIANTINTAIYINSEIDLLSGILFIYEKDYKSAYIYLYECYETLYTYIYNSHNNTMDFLSKKHNDFYSILIHNIINTSTISSQNKTKSISQISPFLLSFYTFYEYYDTNNSILSLDEMNIISNNLNLIYSDVICKISSSYEELEQDKMYCITNPIELNYELIQKLSIDNYGN…	666	0	null	no	GO_0005515	GO_0004175	GO_0005515,GO_0004175	0	0	0	0	0	0	0	0	0	0	0	0	0	0	0	0	0	0	0	0	0	0	0	0	0	0	0	0	0	0	0	0	0	0	0	0	0
3998	PF3D7_1311500	26S protease regulatory subunit 7, putative	RPT1	ATGGAAGAAGAAACTAACACTCAATCGAAGCCATTAGATGATGAAGATATAAATATATTGAAATCATATGGCTCTGGACCATATTCGAAGACCATTAAAAAGGTAGAAGGAGACATATCAGGACTCCTAGTTAATATAAATAAATTATGTGGTGTAAGGGAGAGTGATACAGGATTATGTTTACCAAATCAATGGGATTTACAATTAGATAAACAAATGTTAAATGAAGAACAACCTTTACAAGTTGCAAGATGCACAAAAATTATTAATGCAGATACAGATCAAACTAAATATATTATAAATGTAAAACAAATAGCTAAATTTGTAGTAGGGTTAGGAGATAAGGTAGCACCCAGTGATATTGAAGAAGGAATGAGAGTAGGTGTTGATCGTACGAAA…	MEEETNTQSKPLDDEDINILKSYGSGPYSKTIKKVEGDISGLLVNINKLCGVRESDTGLCLPNQWDLQLDKQMLNEEQPLQVARCTKIINADTDQTKYIINVKQIAKFVVGLGDKVAPSDIEEGMRVGVDRTKYKIQILLPPKIDPSVTMMTVEEKPDITYNDIGGCKEQLEKLREVVEMPLLQPERFVTLGIDPPKGVLLYGPPGTGKTLTARAIANRTDACFICVIGSELVQKYVGEGARMVRELFQMAKSKKACILFIDEVDAIGGSRGDESAHGDHEVQRTMLEIVNQLDGFDNRGNIKVLMATNRPDTLDSALVRPGRIDRRIEFSLPDLEGRTHIFKIHANTMNMSRDVRFELLARLCPNSTGSDIRSVCTEAGMFAIRARRKTITEKDLLLA…	420	0	null	no	GO_0005524, GO_0016787	GO_0004175	GO_0005524,GO_0016787,GO_0004175	0	0	0	0	0	0	0	0	0	0	0	0	0	0	0	0	0	0	0	0	0	0	0	0	0	0	0	0	0	0	0	0	0	0	0	0	0
4261	PF3D7_1338100	26S proteasome regulatory subunit RPN3, putative	RPN3	ATGAAAGATAAACATAAAAAAGTAGAATATGCCGAGAAGGATGTTGAAATAAAAGAAATTGAGAAAGATGATGGAGATAATAAAGTATTTGTAAACAATTTGTTGACGAGCGTAAATTATATTAACAATGCTATAGTACATAAAGATAATAGGCATATGTTACGTATGTTGAAATATATTAAAAATATTCGATTAAGTATTAAGAATGATAAGAATATGTCGATGCCAATAATTATTTATTTAATAAAAAGAATTTTTAAAGAAAATTATCCTATATATAATATATTAAATAAATATATGAATATATATGAGGAAGGGTTATATAAAGAAATTAGTGATTTTTATAATATAAACGAAAAAACATATATGAATTGTTTACCAGAGTTAGAAGTTTTTTTT…	MKDKHKKVEYAEKDVEIKEIEKDDGDNKVFVNNLLTSVNYINNAIVHKDNRHMLRMLKYIKNIRLSIKNDKNMSMPIIIYLIKRIFKENYPIYNILNKYMNIYEEGLYKEISDFYNINEKTYMNCLPELEVFFYLLILLYLLDEKCYDEGMELSTIIINRINKINRRSLDYINAKVYFYYSWIHELGGKLSQVRQKLLFIYRNACLHRDIMTQTVVVNLILRDYIKHNLYDLAVRFISKTSFPENLSSNAQYARYLYYIGKILAVQLDYSEAHRKITQALRKAPQHTQSAKGFKLAATKMEIVVELLMGDIPDRSIFSNKIMYKKLIPYKHVVSAVRNGDINKFAQVMNNYTDLFIHDGVYLLIKRIHHNVIKTALRIINLSYSRISINDIGKKIGIES…	503	0	null	no	GO_0030234, GO_0005515	GO_0004175	GO_0030234,GO_0005515,GO_0004175	0	0	0	0	0	0	0	0	0	0	0	0	0	0	0	0	0	0	0	0	0	0	0	0	0	0	0	0	0	0	0	0	0	0	0	0	0
5222	PF3D7_1464900	ATP-dependent zinc metalloprotease FTSH, putative	null	ATGTTACTTCTACGGAATATTGTAATACTAGATTTAAAAAGGAGTAATAAATTACTAAATATTAATAATTTACCAAAAATCGCTTGTATTTTAAATACAAGAAAGGGATTTTCTGTATTAAAAAATGAAAGATTAGATAGGTTAAAAAGAGAAGTAAGGAATAAACCTAATGATAACTTTTTAATATTACAATTTTATAAAGAGGCAAATGTGCATAATCCAAATGAAGTCATAAAACATTATGAAAATGCTAATTATATAAAAGATGAAAGTATAACAAAAGAATATATAAAAGCATTAGTATATACAAATAAATTAAAATATACCAATCTCGATAATATTAAATATGATAGCGATCATAATATGTATAATAAATCTATGCATGATACTACTACAAAT…	MLLLRNIVILDLKRSNKLLNINNLPKIACILNTRKGFSVLKNERLDRLKREVRNKPNDNFLILQFYKEANVHNPNEVIKHYENANYIKDESITKEYIKALVYTNKLKYTNLDNIKYDSDHNMYNKSMHDTTTNEMHSNERSNNIYEGNNVNSENNYNNMSSNHSTHKVEYMDKKRNQHPEMYSLHIDPKKPLKVSVIDSNKKGLWNLLKSTIGFLILVAAGSVYMEGVSQNVQKGIGVSNKKIIPVENVKVTFADVKGCDEVKQELEEIIDYLKNSDKFTKIGAKLPKGILLSGEPGTGKTLIARAIAGEANVPFLQASGSEFEEMFVGVGARRIRELFQAAKKHAPCIVFIDEIDAVGSKRSSRDNSAVRMTLNQLLVELDGFEQNEGIVVICATNFP…	706	0	null	no	GO_0005524, GO_0004222	GO_0004176	GO_0005524,GO_0004222,GO_0004176	0	0	0	0	0	0	0	0	0	0	0	0	0	0	0	0	0	0	0	0	0	0	0	0	0	0	0	0	0	0	0	0	0	0	0	0	0
4738	PF3D7_1414900	ATP-dependent protease, putative	null	ATGCTGGCGCTCCATTGGAACCTCCTGACTTTCAGGAGGAAGGCAAATTACAAAAGGTGCGCATATTATTTTTATAGAACATCAACAAACAAGAAACGAAATTCTTATGAAAACGATTTAAAAAGAGTTAAAGAGGTAAAGTGTGTAGTTTTATTAAACAAACCATTATTTCCTGGACTTACCTATGTTTTGAATAGTGATAAGAATGTAGTAAAGTATTTAGGTGTTCATAATGATTATAAAGAAAAGAAAAATATATTTGTTGGACTTTTTTTTCATAAGGAAAAAACAATAGAAACACACCTTGAAACAAATAACACGTTCTATAATAAGAATTGTAATACATATAAACCACCCGATTTTTTAAATGAGAAAAGAATAAAGGTAGATAAAAATATA…	MLALHWNLLTFRRKANYKRCAYYFYRTSTNKKRNSYENDLKRVKEVKCVVLLNKPLFPGLTYVLNSDKNVVKYLGVHNDYKEKKNIFVGLFFHKEKTIETHLETNNTFYNKNCNTYKPPDFLNEKRIKVDKNILKKDIDICTNINDIYSYGCVGVIKEILYDEDNLNSICDEKDYNNINESNDIMKKHHFNENNKKEKDNYLLKNHIDMTNMNRSNDLLIHNKLKEKNNENLNLNMHKSIYRIVVETMAKIKIEKWNEVEKVGYIDIIRNEDYDINNKEIKIYYLEIIDKIKKIICMNSCNNREYNILLKYYNTKNLYNLIYFVGNISLSKNNIIQNLLERNILKDQLKICIQILCDDIYLLEMKQKLNEQINEKFENDKKNMIIKEQINILKKQQQLL…	1192	0	null	no	GO_0005524, GO_0004176, GO_0004252	GO_0004176, GO_0004252	GO_0005524,GO_0004176,GO_0004252,GO_0004176,GO_0004252	0	0	0	0	0	0	0	0	0	0	0	0	0	0	0	0	0	0	0	0	0	0	0	0	0	0	0	0	0	0	0	0	0	0	0	0	0
426	PF3D7_0307400	ATP-dependent Clp protease proteolytic subunit	ClpP	ATGATATATTTATTCTTATTCCTATTTTTGATCTTATTAAAAAATAAGAAAATACAAACTAAAAAAAGTATAAAGAACTCGAATATTTTAACATTCATACCATTATCCAAAAAAAATGAAATTGTTAAAGAAAACATAGGGAAACTATTAACGTATAATTTACAATATGATCAAGGATATACAAACTATAATAAAAAGGTAAGAAAAATAAACGTACATAATAGCTCATCAGAATTCGCAAATAATATTAACCTAGATATCGAAAAGCAAAATAATGAAAGAGCCATTTTAAAAAAAGAAGATTTAAATTTTCAAATAAAAAATGACTGTATATCAAAGGATAACATAAATAAAAAAAAAATAAAAAATATGCATAATAAAGATCAAGGAATGATACAA…	MIYLFLFLFLILLKNKKIQTKKSIKNSNILTFIPLSKKNEIVKENIGKLLTYNLQYDQGYTNYNKKVRKINVHNSSSEFANNINLDIEKQNNERAILKKEDLNFQIKNDCISKDNINKKKIKNMHNKDQGMIQHTNTNDNIDYTNSNYNNYLNYDVKKKKNKKRKYSKVQQQIITNNDDIKDMKKDVKLFFFKKRIIYLTDEINKKTADELISQLLYLDNINHNDIKIYINSPGGSINEGLAILDIFNYIKSDIQTISFGLVASMASVILASGKKGKRKSLPNCRIMIHQPLGNAFGHPQDIEIQTKEILYLKKLLYHYLSSFTNQTVETIEKDSDRDYYMNALEAKQYGIIDEVIETKLPHPYFNKVEK	370	0	HMM: MIYLFLFLFLILLKNKKIQTK, NN: MIYLFLFLFLILLKNKKIQTK	yes	GO_0004252	GO_0004176, GO_0016787	GO_0004252,GO_0004176,GO_0016787	0	0	0	0	0	0	0	0	0	0	0	0	0	0	0	0	0	0	0	0	0	0	0	0	0	0	0	0	0	0	0	0	0	0	0	0	0
3651	PF3D7_1230400	ATP-dependent protease subunit ClpQ	ClpQ	ATGTTTATCAGAAACTTTGTAAATATAATTGGATCACAAAAATCAATAACCAAAACAATTGCTAGAAATTATTTTTCTGATAACAGCAAGTTGATAATTCCTCGTCATGGAACTACCATATTATGTGTTAGGAAAAATAATGAAGTGTGTTTGATCGGTGATGGAATGGTTTCTCAAGGAACGATGATAGTTAAGGGAAATGCAAAAAAGATAAGACGTTTAAAGGACAATATATTAATGGGTTTCGCAGGAGCTACAGCGGATTGTTTTACCTTGCTAGATAAATTTGAGACAAAGATTGATGAATATCCAAATCAACTTTTGAGAAGTTGTGTTGAGTTAGCCAAACTTTGGAGAACTGATAGATATTTAAGACATTTAGAGGCCGTTTTAATAGTG…	MFIRNFVNIIGSQKSITKTIARNYFSDNSKLIIPRHGTTILCVRKNNEVCLIGDGMVSQGTMIVKGNAKKIRRLKDNILMGFAGATADCFTLLDKFETKIDEYPNQLLRSCVELAKLWRTDRYLRHLEAVLIVADKDILLEVTGNGDVLEPSGNVLGTGSGGPYAMAAARALYDVENLSAKDIAYKAMNIAADMCCHTNNNFICETL	207	0	null	no	GO_0004298	GO_0004176, GO_0070011	GO_0004298,GO_0004176,GO_0070011	0	0	0	0	0	0	0	0	0	0	0	0	0	0	0	0	0	0	0	0	0	0	0	0	0	0	0	0	0	0	0	0	0	0	0	0	0
4001	PF3D7_1311800	M1-family alanyl aminopeptidase	M1AAP	ATGAAATTAACAAAAGGCTGTGCCTATAAATATATTATTTTCACAGTGTTAATTTTAGCGAATATTCTTTATGATAATAAAAAAAGGTGCATGATTAAAAAAAATTTACGTATTAGTTCGTGCGGTATAATAAGTCGCTTGCTCAAATCTAATTCAAATTATAATAGTTTTAATAAGAATTATAATTTCACGTCTGCTATATCAGAATTACAATTTTCCAATTTTTGGAATTTAGATATTTTACAAAAGGATATATTTAGTAATATACATAATAACAAAAACAAGCCTCAATCATATATAATACATAAAAGACTAATGAGTGAGAAAGGAGATAATAATAATAATAATCACCAAAATAATAATGGGAATGACAATAAGAAAAGATTAGGATCTGTTGTA…	MKLTKGCAYKYIIFTVLILANILYDNKKRCMIKKNLRISSCGIISRLLKSNSNYNSFNKNYNFTSAISELQFSNFWNLDILQKDIFSNIHNNKNKPQSYIIHKRLMSEKGDNNNNNHQNNNGNDNKKRLGSVVNNEENTCSDKRMKPFEEGHGITQVDKMNNNSDHLQQNGVMNLNSNNVENNNNNNSVVVKKNEPKIHYRKDYKPSGFIINNVTLNINIHDNETIVRSVLDMDISKHNVGEDLVFDGVGLKINEISINNKKLVEGEEYTYDNEFLTIFSKFVPKSKFAFSSEVIIHPETNYALTGLYKSKNIIVSQCEATGFRRITFFIDRPDMMAKYDVTVTADKEKYPVLLSNGDKVNEFEIPGGRHGARFNDPHLKPCYLFAVVAGDLKHLSATY…	1085	1	null	no	GO_0008237, GO_0008270	GO_0004177, GO_0004222	GO_0008237,GO_0008270,GO_0004177,GO_0004222	0	0	0	0	0	0	0	0	0	0	0	0	0	0	0	0	0	0	0	0	0	0	0	0	0	0	0	0	0	0	0	0	0	0	0	0	0
5116	PF3D7_1454400	aminopeptidase P	APP	ATGCAATTGAATTTTCTTTTGTTTGTTTTTATATTTTTAATGGTATTCCATTTAAATATTTTTAATAAGGGTAAGAGGCAAAATTTAGTATCGGCTTATTTAAATCATTTTAAAAAGTCATATTTTAGTGGCGTTACGAGCGGATCTGATTGTGTAAATAAAAGTGAAGTGAGTAGTGATAATAATAATAATAATAATAATAATAATAATAAGATAGCACATAATTTTTTCTCCAAAAAATATCAGAGAAATTTCGAGAATAATAATTTAAGTGAGAATCAAGAAAATAATAAGAATATAATATATAGTGGTTCCAATATATTTAAGAATATATATAATACCGAAATGATGAGTAATAATAATACCGTTGATGTTAACATGATGGATAATAATCCTGCT…	MQLNFLLFVFIFLMVFHLNIFNKGKRQNLVSAYLNHFKKSYFSGVTSGSDCVNKSEVSSDNNNNNNNNNNKIAHNFFSKKYQRNFENNNLSENQENNKNIIYSGSNIFKNIYNTEMMSNNNTVDVNMMDNNPAARLEELRTIMKKNKIDVYILINSDEHNSEIINEKDKKIVKITNYSGADGILIVTKDKPILYVNALYELQAMNELDQNLFTLRISRIDNRDEIFETISSLEFNTIAFDGKNTSVVFYEKLRKALLNAYPKKKIVEKIIYNNNFDDVNKKDDENVLNFLVLEKSLVEIKDYPVNNKTLYIHDRKYNGACAGEKIDKLKQSLMYDIKNVDNLLLSELDEIAYLLNLRGYDYQYSPLFYSYLLFQFDREEQDFSKIVFFTTVKNLPADVK…	777	1	HMM: MQLNFLLFVFIFLMVFHLN, NN: MQLNFLLFVFIFLMVFHLNIFN	yes	GO_0016787	GO_0004177, GO_0070006, GO_0042803	GO_0016787,GO_0004177,GO_0070006,GO_0042803	0	0	0	0	0	0	0	0	0	0	0	0	0	0	0	0	0	0	0	0	0	0	0	0	0	0	0	0	0	0	0	0	0	0	0	0	0
468	PF3D7_0311700	plasmepsin VI	PM6	ATGCCGTACTTCCATATATTCCTATACATTTTAATTTTTTGTGTTCTTGTTCATATATGTCCTATTCATACTTTAAATATTTTTAAAAATGATGAAAATGAAAAGGGATCTTTAAATATCCCTCTAGGAAAAGAAAACAATTTATTTTTTAATGAAATAAAATTAGAAAATAGATTTAAAAATAATATCAAAGGATATATACAAAATGTTCAGAAATTTCATTATCTTATGGAAAAAAATAAACCAAATGTATTATCATATATCCAAGAAGATTTATTAAATTTTCATAATAGTCAATTTATTGCTGATATAGGGGTAGGAAATCCACCTCAAGTATTTAAGGTGGTTTTTGATACAGGGTCCAGTAATCTAGCAATCCCATCAACGAAATGTATCAAG…	MPYFHIFLYILIFCVLVHICPIHTLNIFKNDENEKGSLNIPLGKENNLFFNEIKLENRFKNNIKGYIQNVQKFHYLMEKNKPNVLSYIQEDLLNFHNSQFIADIGVGNPPQVFKVVFDTGSSNLAIPSTKCIKGGCASHKKFNPNKSRTFTKNLKNNQESVYTYIQYGTGTSILEQSYDDVYLKGLKIKHQCIGLAIEESLHPFSDLPFDGIVGLGFSDPDFRSQNKYASPLIETIKKQNLLKRNIFSFYVPKKLEKSGAITFGKANKKYTVEGKSIEWFPVISLYYWEINLLDIQLSHKNLFLCESKKCRAAIDTGSSLITGPSTFIQPLLEKINLERDCSNKESLPIISFVLKNVEGKEITLDFMPEDYIIEEGDTENNTLECVIGIMPLDVPPPRG…	432	1	HMM: MPYFHIFLYILIFCVLVHICPIHTL, NN: MPYFHIFLYILIFCVLVHICPIHTL	yes	GO_0004190	GO_0004190	GO_0004190,GO_0004190	0	0	0	0	0	0	0	0	0	0	0	0	0	0	0	0	0	0	0	0	0	0	0	0	0	0	0	0	0	0	0	0	0	0	0	0	0
1837	PF3D7_0808200	plasmepsin X	null	ATGAAACGCATTAGCCCTCTAAACACCCTTTTTTATTTAAGTTTATTTTTTTCATACACATTTAAAGGGTTAAAATGCACCAGAATATATAAAATCGGAACGAAAGCGTTACCGTGTTCTGAGTGTCACGATGTATTTGATTGTACCGGGTGTTTATTCGAGGAAAAAGAATCTTCTCATGTGATACCTTTAAAATTAAACAAGAAGAATCCAAACGATCATAAAAAATTACAAAAACATCATGAGTCTCTAAAATTAGGGGACGTAAAATATTATGTAAACAGAGGAGAAGGAATTTCCGGAAGTTTAGGAACGTCGTCTGGTAATACATTAGATGATATGGATTTAATAAATGAAGAAATAAATAAAAAACGAACAAATGCACAATTAGATGAAAAA…	MKRISPLNTLFYLSLFFSYTFKGLKCTRIYKIGTKALPCSECHDVFDCTGCLFEEKESSHVIPLKLNKKNPNDHKKLQKHHESLKLGDVKYYVNRGEGISGSLGTSSGNTLDDMDLINEEINKKRTNAQLDEKNFLDFTTYNKNKAQDISDHLSDIQKHVYEQDAQKGNKNFTNNENNSDNENNSDNENNSDNENNLDNENNLDNENNSDNSSIEKNFIALENKNATVEQTKENIFLVPLKHLRDSQFVGELLVGTPPQTVYPIFDTGSTNVWVVTTACEEESCKKVRRYDPNKSKTFRRSFIEKNLHIVFGSGSISGSVGTDTFMLGKHLVRNQTFGLVESESNNNKNGGDNIFDYISFEGIVGLGFPGMLSAGNIPFFDNLLKQNPNVDPQFSFYIS…	573	0	HMM: MKRISPLNTLFYLSLFFSYTFKGLKCT, NN: MKRISPLNTLFYLSLFFSYTFKGLKCT	yes	GO_0004190	GO_0004190	GO_0004190,GO_0004190	0	0	0	0	0	0	0	0	0	0	0	0	0	0	0	0	0	0	0	0	0	0	0	0	0	0	0	0	0	0	0	0	0	0	0	0	0
2804	PF3D7_1033800	plasmepsin VII	null	ATGAATAAAAATATTATTCAAATATACCTATTTGTTTTTATATTATTACTTAAACAACATATTGTTATTTTAAAAAATGAAGAATTCACGAATCCTTATTCCATAAGAAAGAAGGATATTAAAGCTATTGTAAATGTTAATAATAAATTGAAGAGTATTAATATACATAAATTAGACAATATCAATAAAAAAGATCTTTTAGGAAGTTATAATGAAAATTATATTTTAATAAAATTAAAAAAGCAGGATATTTTTTCCAAAAAATTATCTACTTATTATGGTGAGGTACAAATAGGTGAACAGTCAGAAAATAATATGAACGTTCTTTTTGATACAGGTTCATCACAAGTATGGATTTTAAATGATACTTGTAAAAATAGTTTGTGTAATAATATACAT…	MNKNIIQIYLFVFILLLKQHIVILKNEEFTNPYSIRKKDIKAIVNVNNKLKSINIHKLDNINKKDLLGSYNENYILIKLKKQDIFSKKLSTYYGEVQIGEQSENNMNVLFDTGSSQVWILNDTCKNSLCNNIHSKYKRTKSFVYKYDKKGLPSVIEIFYLSGKIVAFEGYDTIYLGKKLKIPHTNISFATKVDIPILEEFKWDGIIGLGFQNGDSIKRGIKPFLDILKDDKILTNKNYKNQFGYYLSDKEGYITLGGIDNRLKNTPDEEIIWTPVSTEMGYWTIQIMGIRKEYVNNHFEENKEEEEVIVKYEAFHDGGKNSIIDTGTYLIYAPKNTMENYLKDLKINNCDEKYNLPHLIFQIKSDEIKTIKGSAIIEIVLTPNDYVIEYVDKKNNTKEC…	450	1	HMM: MNKNIIQIYLFVFILLLKQHIVILK, NN: MNKNIIQIYLFVFILLLKQHIVILK	yes	GO_0004190	GO_0004190	GO_0004190,GO_0004190	0	0	0	0	0	0	0	0	0	0	0	0	0	0	0	0	0	0	0	0	0	0	0	0	0	0	0	0	0	0	0	0	0	0	0	0	0
4120	PF3D7_1323500	plasmepsin V	PMV	ATGAATAATTATTTTTTAAGGAAAGAAAATTTTTTTATATTGTTTTGTTTTGTTTTTGTGAGTATCTTTTTTGTATCAAATGTAACAATAATAAAATGTAATAATGTGGAAAATAAAATTGACAATGTTGGAAAAAAAATTGAAAATGTGGGAAAAAAAATTGGCGATATGGAAAATAAAAATGACAATGTGGAAAATAAAAATGACAATGTGGGAAATAAAAATGACAATGTAAAAAATGCTTCTTCAGATTTGTATAAATATAAATTATATGGTGATATAGATGAATATGCTTATTATTTTCTAGATATAGATATAGGGAAACCATCGCAAAGAATTTCTTTAATTCTAGATACAGGTTCATCTTCGTTAAGTTTCCCGTGTAATGGTTGTAAAGAT…	MNNYFLRKENFFILFCFVFVSIFFVSNVTIIKCNNVENKIDNVGKKIENVGKKIGDMENKNDNVENKNDNVGNKNDNVKNASSDLYKYKLYGDIDEYAYYFLDIDIGKPSQRISLILDTGSSSLSFPCNGCKDCGIHMEKPYNLNYSKTSSILYCNKSNCPYGLKCVGNKCEYLQSYCEGSQIYGFYFSDIVTLPSYNNKNKISFEKLMGCHMHEESLFLHQQATGVLGFSLTKPNGVPTFVDLLFKHTPSLKPIYSICVSEHGGELIIGGYEPDYFLSNQKEKQKMDKSDNNSSNKGNVSIKLKNNDKNDDEENNSKDVIVSNNVEDIVWQAITRKYYYYIKIYGLDLYGTNIMDKKELDMLVDSGSTFTHIPENIYNQINYYLDILCIHDMTNIYEI…	590	2	HMM: MNNYFLRKENFFILFCFVFVSIFFVSNVTIIKCN, NN: MNNYFLRKENFFILFCFVFVSIFFVSNVTIIKCN	yes	GO_0004190	GO_0004190	GO_0004190,GO_0004190	0	0	0	0	0	0	0	0	0	0	0	0	0	0	0	0	0	0	0	0	0	0	0	0	0	0	0	0	0	0	0	0	0	0	0	0	0
4663	PF3D7_1407800	plasmepsin IV	PM4	ATGGCTCTTACCGTTAAAGAAGAAGAATTTTCGAATACATTGATTAAAAATGCTTCAGCATTTGATCGATTGAAATTAGGTAATTTGAAGAACTTGAAAATCCAGAAAAAGCTTCAGTTTTTATATTTAATATTGTTTGTCCTTATTACGGGTGTGTTTTTCTTTTTTTTGATTGGAAATTTTTATTCACATCGCAAGTTGTATCAAGTTATTAAAAACACAAAACACACAACTATAGGATTTAAAATTGATAGACCACATGATAAGGTTTTGAGCTCTGTATTGAAAAATAAATTAAGCACATATGTAAAAGAGAGCTTCAAATTTTTTAAATCAGGTTATGCACAAAAAGGATATTTAGGAAGTGAAAATGACAGTATTGAATTAGATGATGTTGCT…	MALTVKEEEFSNTLIKNASAFDRLKLGNLKNLKIQKKLQFLYLILFVLITGVFFFFLIGNFYSHRKLYQVIKNTKHTTIGFKIDRPHDKVLSSVLKNKLSTYVKESFKFFKSGYAQKGYLGSENDSIELDDVANLMFYGEGQIGTNKQPFMFIFDTGSANLWVPSVNCDSIGCSTKHLYDASASKSYEKDGTKVEISYGSGTVRGYFSKDVISLGDLSLPYKFIEVTDADDLEPIYSGSEFDGILGLGWKDLSIGSIDPVVVELKKQNKIDNALFTFYLPVHDKHVGYLTIGGIESDFYEGPLTYEKLNHDLYWQIDLDIHFGKYVMQKANAVVDSGTSTITAPTSFLNKFFRDMNVIKVPFLPLYVTTCDNDDLPTLEFHSRNNKYTLEPEFYMDPLS…	449	1	null	no	GO_0004190	GO_0004190	GO_0004190,GO_0004190	0	0	0	0	0	0	0	0	0	0	0	0	0	0	0	0	0	0	0	0	0	0	0	0	0	0	0	0	0	0	0	0	0	0	0	0	0
4664	PF3D7_1407900	plasmepsin I	PMI	ATGGCTTTATCAATTAAAGAAGATTTTTCAAGCGCTTTTGCGAAAAATGAATCAGCTGTGAATAGCTCTACATTTAATAATAATATGAAAACATGGAAGATTCAGAAACGATTTCAAATATTATACGTGTTTTTTTTCTTATTGATTACCGGAGCATTATTTTATTATCTTATAGATAATGTATTATTCCCAAAAAATAAAAAGATAAATGAAATTATGAATACCTCAAAACATGTAATAATTGGATTTAGTATTGAAAATTCTCATGACAGAATTATGAAAACAGTAAAACAACACAGATTAAAAAATTATATTAAAGAATCCTTGAAATTTTTCAAAACAGGACTTACACAAAAACCACATTTAGGTAATGCTGGTGATAGTGTAACATTAAATGAT…	MALSIKEDFSSAFAKNESAVNSSTFNNNMKTWKIQKRFQILYVFFFLLITGALFYYLIDNVLFPKNKKINEIMNTSKHVIIGFSIENSHDRIMKTVKQHRLKNYIKESLKFFKTGLTQKPHLGNAGDSVTLNDVANVMYYGEAQIGDNKQKFAFIFDTGSANLWVPSAQCNTIGCKTKNLYDSNKSKTYEKDGTKVEMNYVSGTVSGFFSKDIVTIANLSFPYKFIEVTDTNGFEPAYTLGQFDGIVGLGWKDLSIGSVDPVVVELKNQNKIEQAVFTFYLPFDDKHKGYLTIGGIEDRFYEGQLTYEKLNHDLYWQVDLDLHFGNLTVEKATAIVDSGTSSITAPTEFLNKFFEGLDVVKIPFLPLYITTCNNPKLPTLEFRSATNVYTLEPEYYLQQ…	452	1	null	no	GO_0004190	GO_0004190	GO_0004190,GO_0004190	0	0	0	0	0	0	0	0	0	0	0	0	0	0	0	0	0	0	0	0	0	0	0	0	0	0	0	0	0	0	0	0	0	0	0	0	0
4665	PF3D7_1408000	plasmepsin II	null	ATGGATATTACAGTAAGAGAACATGATTTTAAACATGGCTTTATCAAAAGCAATTCAACATTTGATGGATTAAACATTGACAATTCAAAGAACAAAAAAAAAATACAGAAAGGATTTCAAATACTATATGTACTTCTCTTTTGTAGTGTAATGTGTGGTTTATTTTATTATGTGTATGAAAATGTATGGCTTCAAAGAGATAATGAAATGAATGAAATTTTAAAAAATTCCGAACATTTAACTATTGGATTTAAAGTTGAAAATGCACATGATAGAATTTTGAAAACTATAAAAACACATAAATTAAAAAATTACATTAAAGAATCTGTCAATTTTCTTAATTCAGGACTTACTAAAACAAATTATTTAGGTAGTTCAAATGATAATATCGAATTAGTA…	MDITVREHDFKHGFIKSNSTFDGLNIDNSKNKKKIQKGFQILYVLLFCSVMCGLFYYVYENVWLQRDNEMNEILKNSEHLTIGFKVENAHDRILKTIKTHKLKNYIKESVNFLNSGLTKTNYLGSSNDNIELVDFQNIMFYGDAEVGDNQQPFTFILDTGSANLWVPSVKCTTAGCLTKHLYDSSKSRTYEKDGTKVEMNYVSGTVSGFFSKDLVTVGNLSLPYKFIEVIDTNGFEPTYTASTFDGILGLGWKDLSIGSVDPIVVELKNQNKIENALFTFYLPVHDKHTGFLTIGGIEERFYEGPLTYEKLNHDLYWQITLDAHVGNIMLEKANCIVDSGTSAITVPTDFLNKMLQNLDVIKVPFLPFYVTLCNNSKLPTFEFTSENGKYTLEPEYYLQ…	453	1	null	no	GO_0004190	GO_0004190	GO_0004190,GO_0004190	0	0	0	0	0	0	0	0	0	0	0	0	0	0	0	0	0	0	0	0	0	0	0	0	0	0	0	0	0	0	0	0	0	0	0	0	0
4666	PF3D7_1408100	plasmepsin III	HAP	ATGAATTTAACCATTAAAGAAGAAGATTTTACCAACACCTTCATGAAAAATGAAGAATCCTTTAACACGTTTCGAGTAACTAAAGTAAAAAGATGGAATGCTAAAAGATTATTTAAAATATTATTTGTGACAGTTTTCATAGTTTTGGCAGGAGGTTTTTCTTATTATATTTTTGAAAATTTCGTTTTTCAAAAGAACCGTAAAATTAATCACATAATTAAGACTTCAAAATATTCGACAGTAGGATTTAATATTGAAAATTCTTATGATAGACTTATGAAAACAATTAAAGAGCATAAATTAAAAAATTATATAAAAGAATCAGTAAAACTTTTTAATAAAGGTTTAACCAAAAAAAGTTATTTAGGTAGTGAGTTTGATAATGTGGAATTAAAAGAT…	MNLTIKEEDFTNTFMKNEESFNTFRVTKVKRWNAKRLFKILFVTVFIVLAGGFSYYIFENFVFQKNRKINHIIKTSKYSTVGFNIENSYDRLMKTIKEHKLKNYIKESVKLFNKGLTKKSYLGSEFDNVELKDLANVLSFGEAKLGDNGQKFNFLFHTASSNVWVPSIKCTSESCESKNHYDSSKSKTYEKDDTPVKLTSKAGTISGIFSKDLVTIGKLSVPYKFIEMTEIVGFEPFYSESDVDGVFGLGWKDLSIGSIDPYIVELKTQNKIEQAVYSIYLPPENKNKGYLTIGGIEERFFDGPLNYEKLNHDLMWQVDLDVHFGNVSSKKANVILDSATSVITVPTEFFNQFVESASVFKVPFLSLYVTTCGNTKLPTLEYRSPNKVYTLEPKQYLEP…	451	1	null	no	GO_0004190	GO_0004190	GO_0004190,GO_0004190	0	0	0	0	0	0	0	0	0	0	0	0	0	0	0	0	0	0	0	0	0	0	0	0	0	0	0	0	0	0	0	0	0	0	0	0	0
4876	PF3D7_1430200	plasmepsin IX	null	ATGTTTTTTATAAATTTTAAGAAAATAAAAAAGAAACAATTTCCGATATATTTAACTCAACATAGAATTATAACAGTGTTTCTTATTTTTATTTATTTTATAAACTTAAAAGATTGTTTCCATATAAATAATTCGCGTATATTAAGTGATGTAGATAAACATAGAGGATTGTATTATAATATACCAAAATGTAACGTATGTCATAAGTGTTCGATATGTACCCACGAAAATGGAGAGGCACAGAATGTCATTCCTATGGTTGCTATACCGAGCAAGAGAAAACATATTCAAGATATAAATAAGGAAAGGGAGGAAAACAAATATCCTTTACATATATTTGAAGAAAAAGACATTTATAATAATAAAGATAATGTTGTTAAAAAAGAAGATATATATAAA…	MFFINFKKIKKKQFPIYLTQHRIITVFLIFIYFINLKDCFHINNSRILSDVDKHRGLYYNIPKCNVCHKCSICTHENGEAQNVIPMVAIPSKRKHIQDINKEREENKYPLHIFEEKDIYNNKDNVVKKEDIYKLRKKKKQKKNCLNFLEKDTMFLSPSHDKETFHINHMNKIKDEKYKQEYEEEKEIYDNTNTSQEKNETNNEQNLNINLINNDKVTLPLQQLEDSQYVGYIQIGTPPQTIRPIFDTGSTNIWIVSTKCKDETCLKVHRYNHKLSSSFKYYEPHTNLDIMFGTGIIQGVIGVETFKIGPFEIKNQSFGLVKREKASDNKSNVFERINFEGIVGLAFPEMLSTGKSTLYENLMSSYKLQHNEFSIYIGKDSKYSALIFGGVDKNFFEGDI…	627	0	HMM: MFFINFKKIKKKQFPIYLTQHRIITVFLIFIYFINLKDCF, NN: MFFINFKKIKKKQFPIYLTQHRIITVFLIFIYFINLKDCF	yes	GO_0004190	GO_0004190	GO_0004190,GO_0004190	0	0	0	0	0	0	0	0	0	0	0	0	0	0	0	0	0	0	0	0	0	0	0	0	0	0	0	0	0	0	0	0	0	0	0	0	0
4422	PF3D7_1354800	metacaspase 1	MCA1	ATGGAAAAAATATACGTCAAAATATATGAATTGTCTGGATTAGAAGATAAGGATAATTTTTCATGTTATATAAAAATATATTGGCAGAATAAGAAATATAAAAGTTGTATACTTCAAAAGAATCCATATAAATTTAATGAAATCTTTTTATTACCTATAGACATAAAAAATAATGTTAAAGATGAGAAAAATAATATTTTGTCCATTGAAGTATGGTCCAGTGGTATATTAAATAATAATAAAATAGCCTATACCTTTTTTGAGCTCGATCATATTAGAAGAGAAAGAATATCAAGTGAAAAGATTAATTTGATTGATGTTGTAAAGAAATGTACATTGCAAATATCTGTTCATATAATAAATAATAATCAAGATATCCTATTTTGTAATATAAAAGAT…	MEKIYVKIYELSGLEDKDNFSCYIKIYWQNKKYKSCILQKNPYKFNEIFLLPIDIKNNVKDEKNNILSIEVWSSGILNNNKIAYTFFELDHIRRERISSEKINLIDVVKKCTLQISVHIINNNQDILFCNIKDIFGNNKNDKEIHDAILKYGGNERHIIKELRKEKEIGQYNNIYFNDYVNVLNTDPSQNYIYNDMPKITPNNIYNNMNNDQTNHTYLKAPNSLYNNENTIYSSNVHYSTYMNNSPTYKNSNNMNHVTNMYASNDLHNSNHFKPHSNAYSTINYDNNNYIYPQNHTNIYNRASPGSDQTLYFSPCNQKKALLIGINYYGTKYELNGCTNDTLRMKDLLVTKYKFYDSSNNIVRLIDNEANPNYRPTRRNILSALMWLTRDNKPGDILFF…	613	0	null	no	GO_0004197, GO_0005515	GO_0004197	GO_0004197,GO_0005515,GO_0004197	0	0	0	0	0	0	0	0	0	0	0	0	0	0	0	0	0	0	0	0	0	0	0	0	0	0	0	0	0	0	0	0	0	0	0	0	0
3011	PF3D7_1115300	cysteine proteinase falcipain 2b	FP2B	ATGGATTACCACATGGATTATATTCCGAATGAGGTAATTTCTCATCAAGGAGAAAGATTTGTCGACAAATATGTTGATAGAAAAATTTTAAAGAATAAAAAATCATTGTTAGTTATTATTTCATTATCAGTACTTTCAGTAGTTGGTTTTATTTTATTTTATTTTACTCCAAATTTTAGAAAAAGTGATTTATTTAAAAACTCTTCAGTTGAAAATAATAATGATGACTATATAATAAATAGCTTGCTAAAAAGCCCTAATGGCAAGAAATTTATCGTCTCAAAAATTGATGAAGCCTTATCATTCTATGATAATAAAATGAAAGATATAAATAAAAACAATAACAATAATACTTCATCCGATTTTAAAGGTCTTAGCTTATTTAAAGAAAACAAACCA…	MDYHMDYIPNEVISHQGERFVDKYVDRKILKNKKSLLVIISLSVLSVVGFILFYFTPNFRKSDLFKNSSVENNNDDYIINSLLKSPNGKKFIVSKIDEALSFYDNKMKDINKNNNNNTSSDFKGLSLFKENKPSNNFIHNENYFINVFDHKFLMNNVEHINQFYTFIKTNNKQYNSPNEMKERFQVFLQNAHKVKMHNNNKKSLYKKELNRFADLTYHEFKSKYLTLRSSKPLKNSKYLLDQINYDAVIKKYKGNENFDHAAYDWRLHSGVTPVKDQKNCGSCWAFSSIGSVESQYAIRKNKLITLSEQELVDCSFKNYGCNGGLINNAFEDMIELGGICTDDDYPYVSDAPNLCNIDRCTEKYGIKNYLSVPDNKLKEALRFLGPISISIAVSDDFPF…	482	1	null	no	GO_0008234	GO_0004197	GO_0008234,GO_0004197	0	0	0	0	0	0	0	0	0	0	0	0	0	0	0	0	0	0	0	0	0	0	0	0	0	0	0	0	0	0	0	0	0	0	0	0	0
3012	PF3D7_1115400	cysteine proteinase falcipain 3	FP3	ATGGAATATCATATGGAATATTCACCGAACGAGGTGATTAAACAAGAAAGAGAAGTATTTGTAGGAAAAGAAAAAAGTGGCAGCAAATTTAAAAGAAAGAGATCTATTTTTATAGTTCTTACAGTATCAATATGTTTTATGTTTGCTTTAATGTTATTTTATTTTACAAGAAATGAAAATAACAAGACCTTGTTTACTAATAGTTTATCAAATAATATAAACGATGATTACATAATAAATTCATTATTAAAAAGTGAGAGTGGTAAAAAATTCATTGTATCAAAACTTGAAGAATTAATATCTTCTTATGATAAAGAGAAAAAAATGAGAACTACTGGAGCAGAAGAAAATAACATGAATATGAATGGTATAGACGATAAAGATAATAAAAGTGTTAGT…	MEYHMEYSPNEVIKQEREVFVGKEKSGSKFKRKRSIFIVLTVSICFMFALMLFYFTRNENNKTLFTNSLSNNINDDYIINSLLKSESGKKFIVSKLEELISSYDKEKKMRTTGAEENNMNMNGIDDKDNKSVSFVNKKNGNLKVNNNNQVSYSNLFDTKFLMDNLETVNLFYIFLKENNKKYETSEEMQKRFIIFSENYRKIELHNKKTNSLYKRGMNKFGDLSPEEFRSKYLNLKTHGPFKTLSPPVSYEANYEDVIKKYKPADAKLDRIAYDWRLHGGVTPVKDQALCGSCWAFSSVGSVESQYAIRKKALFLFSEQELVDCSVKNNGCYGGYITNAFDDMIDLGGLCSQDDYPYVSNLPETCNLKRCNERYTIKSYVSIPDDKFKEALRYLGPISI…	492	1	null	no	GO_0008234	GO_0004197	GO_0008234,GO_0004197	0	0	0	0	0	0	0	0	0	0	0	0	0	0	0	0	0	0	0	0	0	0	0	0	0	0	0	0	0	0	0	0	0	0	0	0	0
3015	PF3D7_1115700	cysteine proteinase falcipain 2a	FP2A	ATGGATTACAACATGGATTATGCTCCCCATGAAGTAATTTCTCAACAAGGAGAAAGATTTGTTGACAAATATGTTGATAGAAAAATTTTAAAGAATAAAAAATCATTGTTAGTTATTATTTCATTATCTGTACTTTCAGTTGTTGGTTTTGTTTTATTTTATTTTACTCCAAATTCTAGAAAAAGTGATTTATTTAAAAACTCTTCAGTTGAAAATAATAATGATGACTATATAATAAATAGCTTGCTAAAAAGCCCTAATGGCAAGAAATTTATCGTCTCAAAAATTGATGAAGCCTTATCATTCTATGATAGTAAAAAGAATGACATAAATAAATACAACGAAGGTAATAACAACAATAATGCTGACTTTAAAGGTCTTAGCTTATTTAAAGAAAAC…	MDYNMDYAPHEVISQQGERFVDKYVDRKILKNKKSLLVIISLSVLSVVGFVLFYFTPNSRKSDLFKNSSVENNNDDYIINSLLKSPNGKKFIVSKIDEALSFYDSKKNDINKYNEGNNNNNADFKGLSLFKENTPSNNFIHNKDYFINFFDNKFLMNNAEHINQFYMFIKTNNKQYNSPNEMKERFQVFLQNAHKVNMHNNNKNSLYKKELNRFADLTYHEFKNKYLSLRSSKPLKNSKYLLDQMNYEEVIKKYKGNENFDHAAYDWRLHSGVTPVKDQKNCGSCWAFSSIGSVESQYAIRKNKLITLSEQELVDCSFKNYGCNGGLINNAFEDMIELGGICTDDDYPYVSDAPNLCNIDRCTEKYGIKNYLSVPDNKLKEALRFLGPISISVAVSDDF…	484	1	null	no	GO_0008234	GO_0004197, GO_0005515	GO_0008234,GO_0004197,GO_0005515	0	0	0	0	0	0	0	0	0	0	0	0	0	0	0	0	0	0	0	0	0	0	0	0	0	0	0	0	0	0	0	0	0	0	0	0	0
721	PF3D7_0413900	ubiquitin carboxyl-terminal hydrolase 13, putative	USP13	ATGGCTGATATTAAAAGTATAATATCTTTAATTTCTACAATTGTAAAAGATGAGCCTACCAAAGAAGAAGTAATATATTTAGGAGAATGTAGTATAACAGGGCATAAAGATTTTTTTGAAGATGGTATATTCATCGATTTGTTGTCCTTCGAAAGTTTCAGTTTGAAATTCTTAAAATGCAATTATAACCGATTAAGTAAGTTATCAAGTGAAGGAAAAAATCACCGATTTTACCTGAATATAAAAAAGAAGAAAAATTTGCTAGAGAATATAGAAAAAAAAGTTATAACGAATTTGAATATTAATGCGGAAGGTGGTTTTAATGAAAACAAAGTTTATGAATATGAATGGGAATATTCTGTATATGATATAGAAACAGGTTTGTATATAAAATTAGAA…	MADIKSIISLISTIVKDEPTKEEVIYLGECSITGHKDFFEDGIFIDLLSFESFSLKFLKCNYNRLSKLSSEGKNHRFYLNIKKKKNLLENIEKKVITNLNINAEGGFNENKVYEYEWEYSVYDIETGLYIKLEDLDESVQKICKGIINHKNEVKKDNINKWVNDIKESKYAKDLVQLEGIKIKNENIHCAVCKSTKNIWLNLSDGYIGCGRKIFNYGGGCLNNEEGAALKHFYESGKKYPLVVKIGTITKDGEADVFSYADDENDSVIDPYIGVHLKNLGINIMNLEKTEITTLEKEIEENQNINFSSILDNNIQTICQQGKIGFVNLGNTCYMNSALQVLLSIKDISYRYLNNISDFLLSLDYKKKTHDDLFLQYSKLCYMIFEEDYITKKKQYVKKF…	853	0	null	no	GO_0008242, GO_0005515, GO_0004843, GO_0036459, GO_0008270	GO_0004221	GO_0008242,GO_0005515,GO_0004843,GO_0036459,GO_0008270,GO_0004221	0	0	0	0	0	0	0	0	0	0	0	0	0	0	0	0	0	0	0	0	0	0	0	0	0	0	0	0	0	0	0	0	0	0	0	0	0
1665	PF3D7_0722300	ubiquitin carboxyl-terminal hydrolase, putative	null	ATGTTTCATTTAATTGTGTACAGCGACGAAAGTCTACAAAAAGTAAAACGCTCGCTGAACGTTTTTGAAAATATTTATGATCAAAATGGAAACAAGTTTGAAAAATCAGTTGAACAGAATATTAAAAAATGTATGGATTTAGATGTTCCAAAATATATTCATAAATTAATTGATGATGAAAATAAGGATTATAAAGAATATATTAATGAAGATATTTATAATTTTTATCTTAGAAAAGATATTATACAATTTTTTACTTGTAATTTGATACAATTATATATTAAGGATACAAAAAATTGTGATTTATATTTAATTGACGAATGTGAAGAAGAAAAAAAAGAAAAAGAAAAAAAAGAATCAAAATGTAAAGATGACAAACAAAAATATAAAAATACACAA…	MFHLIVYSDESLQKVKRSLNVFENIYDQNGNKFEKSVEQNIKKCMDLDVPKYIHKLIDDENKDYKEYINEDIYNFYLRKDIIQFFTCNLIQLYIKDTKNCDLYLIDECEEEKKEKEKKESKCKDDKQKYKNTQNLFKKEKHALDENNVLSSSNNTDDISVGINLPLHRSHILLILSLPTYYTFYEFFLLIQGFMNFIVHIKIFKLNGYLNFLKKKKKKKKKKKKKKFNNKNNHNNNNNNNNNNNNNNNNNNNNNNNNNNNNNNNNNNNNNNSNNNNYYYYNNCCTYSCCIDKMNKKNIKGNIKKKRTQNIHGDTQTNSYNDNTKPQSKGKQKVNTLNNESNTYIHNKELCKLNNKNYNKFAHVEKKEQKCYSENMYTHNNIYDDHLNSYDHMDDSSISS…	1221	0	null	no	GO_0008270	GO_0004221	GO_0008270,GO_0004221	0	0	0	0	0	0	0	0	0	0	0	0	0	0	0	0	0	0	0	0	0	0	0	0	0	0	0	0	0	0	0	0	0	0	0	0	0
626	PF3D7_0403500	ubiquitin specific protease, putative	null	ATGAATATTACCGAAAATAACCTTCTCGAGCTCCTATCATTAAAAAATTATGATTATTATTTAAAATATTATAACTATGAACATGTTGAAAGAAAACACATTTCGTTTAATAACAGCGGGAACATATGTTACTGTAACGCTTCTTTACAATTAATATTATCTATAAAACCTTTGTGTATTTATTTATTGAAAAAATTAAAAAAAATATCTTTTAATACAAAATCTAAATATAAAGGAGATATATTAAAAACTGTTTGTGATTTAATAGAAGAAGTATATGGGAAAACCAACTCAGATAGTAATAATAATAATAATAATAGTAATAGTAATAATAAAAATAAAAGTTATATAATTTGTACAAATAAACATATAAATTTATTAAAAAAAATTAAAAAATAT…	MNITENNLLELLSLKNYDYYLKYYNYEHVERKHISFNNSGNICYCNASLQLILSIKPLCIYLLKKLKKISFNTKSKYKGDILKTVCDLIEEVYGKTNSDSNNNNNNSNSNNKNKSYIICTNKHINLLKKIKKYNNNIIINAQNDAHEFLLMLLNFINVECNRYLKIPENFDIKLNDKDNKQNAGDKYWIKYLFKDNSIVTDLLGFQNISSITCINCGHTRYSFEFCIDLGLEFHEENMKSTNLIDLLKNNIIQEEHFCYLDCENCKLKKTSRVKKGIYRLPNLYMIIYIKRFKWIYDQRTNYYNNKIKKIDTTVLLPLDGIIDFTSFSHMSTHKSLINSKYIIESIICHTGNCYNGHYTCIVKYSDGFYKCNDEKIRKINNPYSSENINDIYLLLLRRLP	400	0	null	no	GO_0036459	GO_0004221	GO_0036459,GO_0004221	0	0	0	0	0	0	0	0	0	0	0	0	0	0	0	0	0	0	0	0	0	0	0	0	0	0	0	0	0	0	0	0	0	0	0	0	0
4736	PF3D7_1414700	ubiquitin carboxyl-terminal hydrolase, putative	null	ATGAGTTTTGTTAAAGGTGCAATACACGTTTCAATTTTGAATAACTACATGGACTTCTATAAAGAAAGTACGGTAGATAAAATTGAAACGTCATTTTCCATAAGAAATAATAACGAATCTAATACTAAAAATAATGAAAAAAGGAAGTCCTCCTTATGTATTATGAACGACGAAGAAAAAATGAAAAACAAAATATCCAAGTGTATAAAGAACAACAATTTATATAAAAATAAGAAAAAGCGAAGGAAGGAAAAAAATATAATAAGTAATAAATCCAGAAGTAAGAAATTTTTAAAGTTCAACATAAAAGGTAAGGATAAAAAGAATAACATAAATAGCAACATATACAACAATGCAAATAACAACAAATTAAAAATTAAAAATAAAAATAATAATAAT…	MSFVKGAIHVSILNNYMDFYKESTVDKIETSFSIRNNNESNTKNNEKRKSSLCIMNDEEKMKNKISKCIKNNNLYKNKKKRRKEKNIISNKSRSKKFLKFNIKGKDKKNNINSNIYNNANNNKLKIKNKNNNNNNNNNKINSCCRNVYKGSTNKRNSKLLLNGEIKHDEIFHTNIDNSFICMNKNDMNLIRKCKENNHPIKQMNTKIKKKKYNKKNVLISKQINKEIQMLKSNNSYIMYHMNEKRNIEKEKKKKKCKKIVKSILYNRKRSHYYISNFLKTCMKIKNNKIQKKLKKYVYLKDIYSTINMSNKQTCNNLNEQNKSQFFFDDLQKVRQVNKCDNKLYKMNFKSLKHQTNGKKNNIKENDNNNNFYNEDNSIAEILSDDYIILNKNKSNKMEN…	1384	0	null	no	GO_0036459	GO_0004221	GO_0036459,GO_0004221	0	0	0	0	0	0	0	0	0	0	0	0	0	0	0	0	0	0	0	0	0	0	0	0	0	0	0	0	0	0	0	0	0	0	0	0	0
1057	PF3D7_0523100	mitochondrial-processing peptidase subunit alpha, putative	null	ATGAAGAAAAATATACAATGCTTGAATATTTTTTATAAAACCAAATGGAGAAATATACACAACAGTAGTATTGTGAGGTCAAAAGAAAATTTGAACCTTCAAAAAATATATACAGGAGAAAAACAAAATTTTAACAAAGTATCCTTTAAAAAAGAGAAAATAGAAGATGTCATTAAAGAAGTGAAGTTTGATTACTATTATTTTAATGAAGGAAAAAAAAATAAATACAAAGATATCCCATTAAATATATCCATAATTAATGAATCGGACTTTCCGCCATTTAAGGCAGTTGATGAAAAACTGCATTTCTCAGTATTAGAAAATGATTTGAAAATTATATCAACCAATAGAAACAATAGTGTGTGTTCGATAGGTTTATATGTAAAGTGCGGATCCAGA…	MKKNIQCLNIFYKTKWRNIHNSSIVRSKENLNLQKIYTGEKQNFNKVSFKKEKIEDVIKEVKFDYYYFNEGKKNKYKDIPLNISIINESDFPPFKAVDEKLHFSVLENDLKIISTNRNNSVCSIGLYVKCGSRYEEINDKVNEQGMSVMLENMAFHSTAHLSHLRTIKSLEKIGATVSCNAFREHMVYSCECLKEYLPIVTNLIIGNVLFPRFLSWEMKNNVNRLNLMREKLFENNELYITELLHNTAWYNNTLGNKLYVYESSIENYTSENLRNFMLKHFSPKNMTLIGVNVEHDELTKWTSRAFQDYVPIPYTNQKEVTPKYTGGFISVEDKNVKKTNIAIAYETQGGWKSSDMITLTVLQTLMGGGGSFSTGGPGKGMYSRLFLNVLNSYNFIESC…	534	0	null	no	GO_0003824, GO_0046872	GO_0004222	GO_0003824,GO_0046872,GO_0004222	0	0	0	0	0	0	0	0	0	0	0	0	0	0	0	0	0	0	0	0	0	0	0	0	0	0	0	0	0	0	0	0	0	0	0	0	0
2420	PF3D7_0933600	mitochondrial-processing peptidase subunit beta, putative	MAS1	ATGTGGAAAAGAAAAGTGGTAAACGTCGTGTCATGCATTAGGAAAAATAGCAGACCTTTTCTTGGGTACCGATCAAATTATAGTACTTACAATTTACCTCAAGAAATAATAAATCAGCCTATAACACGAGTAACTGAATTATCTAATAAATTAAAAGTAGCTACTGTTCATACAAATTGTGAAATACCTACAATTGGTTTATGGATAAGTAGTGGTAGTAAATATGAAAATAAAAAAAATAATGGTGTTGCTCATTTTTTAGAGCATATGATATTTAAAGGTACTAAAAAAAGAAATCGAATTCAATTAGAAAAAGAAATCGAAAATATGGGAGCACATCTAAATGCTTATACGGCTAGAGAACAGACAGGATATTATTGTAAATGCTTTAAGAATGAT…	MWKRKVVNVVSCIRKNSRPFLGYRSNYSTYNLPQEIINQPITRVTELSNKLKVATVHTNCEIPTIGLWISSGSKYENKKNNGVAHFLEHMIFKGTKKRNRIQLEKEIENMGAHLNAYTAREQTGYYCKCFKNDIKWCIELLSDILSNSIFDDNLIELEKHVILREMEEVEKCKDEVIFDKLHMTAFRDHPLGFTILGPEENIKNMKRKDIIDYINKNYTSDRMVLCAVGDVQHEEIVKLAELNFNHLKTQEQKNNSIIHNNNDKPFFCGSEIIIRDDDSGPNAHVAVAFEGVPWNSPDSITFMLMQCIIGTYKKNEEGILPGKLSANRTVNNICNKMTVGCADYFTSFNTCYNNTGLFGFYVQCDEIAVEHALGELMFGVTSLSYSITDEEVELAKIHL…	484	0	null	no	GO_0003824, GO_0046872	GO_0004222	GO_0003824,GO_0046872,GO_0004222	0	0	0	0	0	0	0	0	0	0	0	0	0	0	0	0	0	0	0	0	0	0	0	0	0	0	0	0	0	0	0	0	0	0	0	0	0
4479	PF3D7_1360800	falcilysin	FLN	ATGAATTTAACAAAATTAATGAAAGTTATTGGATATATAAATATAATCACAAATTGTGTTCAAAGCTTTACAAATAGAGCTGATAAAAAAAGATATAATGTTTTTGCAAAAAGTTTTATAAATACAATAAATACAAATTTATATACATTTAAAGCAGTCATGAGTAAAACACCAGAGTGGATACATGAGAAATCACCTAAGCACAATAGTTATGATATTATAGAAAAGAGGTATAATGAGGAATTTAAGATGACTTATACGGTATATCAACATAAGAAGGCTAAAACACAAGTAATATCCTTAGGTACTAATGATCCTTTAGATGTTGAACAAGCTTTTGCTTTTTATGTTAAAACGTTGACACATTCTGGTAAGGGTATACCTCATATTTTAGAACAT…	MNLTKLMKVIGYINIITNCVQSFTNRADKKRYNVFAKSFINTINTNLYTFKAVMSKTPEWIHEKSPKHNSYDIIEKRYNEEFKMTYTVYQHKKAKTQVISLGTNDPLDVEQAFAFYVKTLTHSGKGIPHILEHSVLSGSKNYNYKNSIGLLEKGTLHTHLNAYTFNDRTVYMAGSMNNKDFFNIMGVYMDSVFQPNVLENKYIFETEGWTYEVEKLKEDEKGKAEIPQMKDYKVSFNGIVYNEMKGALSSPLEDLYHEEMKYMFPDNVHSNNSGGDPKEITNLTYEEFKEFYYKNYNPKKVKVFFFSKNNPTELLNFVDQYLGQLDYSKYRDDAVESVEYQTYKKGPFYIKKKYGDHSEEKENLVSVAWLLNPKVDKTNNHNNNHSNNQSSENNGYSNG…	1193	0	null	no	GO_0003824, GO_0046872	GO_0004222	GO_0003824,GO_0046872,GO_0004222	0	0	0	0	0	0	0	0	0	0	0	0	0	0	0	0	0	0	0	0	0	0	0	0	0	0	0	0	0	0	0	0	0	0	0	0	0
4975	PF3D7_1440200	stromal-processing peptidase, putative	SPP	ATGTTAAAATCAGATGTAGTGCTTTTATTGTATATACTTATAATAAATTTAATTTGTTGTCTTAATGGGAACTCTAAGAAAAGAGCTTATATTTTAAATACACCTAAATCTTCAAATTGTAAGAGATCAAGTTTCAGAAGATGGAATAATCCCGTGAATAATAATATAAATGAATTAAAGGAAGACGAAGACCTAATAAAATATGAGCTACAAAATGGGTTAAGCAACATAATATATAAGAAAAGGAAAAGCGTCAATAAAAAAAAATATATTTTGAATAATGAAAATCATGTAATTCTACCAACATATAAAATATCAGATGAATATAAGTGTTATATTAATCCAATAGATTATAATTATGAAGAACTACATGTTTATATGGAAGTAAATACAGGAAGT…	MLKSDVVLLLYILIINLICCLNGNSKKRAYILNTPKSSNCKRSSFRRWNNPVNNNINELKEDEDLIKYELQNGLSNIIYKKRKSVNKKKYILNNENHVILPTYKISDEYKCYINPIDYNYEELHVYMEVNTGSVNEKKNQQGISHLCEHVSYMGSKNRKNIVDKNIRTNAYTDFHHIVFYISVSLNNEIYKENFYSDFKCDQFIKNIREEDIEDYDIYTVDEFNYKHAILSQCIDTMVEVLKGETQFNKERITKEKKAIFSEYSIINNIEYKMNSDIIKVLHKENRLSHRLPIGKLELLKRYGEKDVKEYFNLFFRPENVNFFVYGDVNVDIAQKLISSKLENIKGKDLKEQDKIYLNILNDRCTLRSRNKNLPAVFHMFGNNSDIKVKEEEEEEVKKN…	1560	0	HMM: MLKSDVVLLLYILIINLICCL, NN: MLKSDVVLLLYILIINLICCL	yes	GO_0003824, GO_0046872	GO_0004222	GO_0003824,GO_0046872,GO_0004222	0	0	0	0	0	0	0	0	0	0	0	0	0	0	0	0	0	0	0	0	0	0	0	0	0	0	0	0	0	0	0	0	0	0	0	0	0
4651	PF3D7_1406600	ATP-dependent Clp protease regulatory subunit ClpC, putative	ClpC	ATGAATGTTTTATACATTTTCATTGCTGTACTTATTTTAAATGGTATATTAAATATACATGTAAGTAAAAAAAAAACAAGTTTTTTAAATAACACCTATCCTATTAATAAATATAAAACTATTAATATAAAAAGACATTATAGAAAGGTCCAAAATCGAAATAATAAGTTATATGTATCTTTATTTGATGAATATGATGAGAAATGTATAAAAGCACTAATTATGGCTAGAGAAGTAGCCAAAAATGACAATGAAAATGAAATATTATTAAAACATCTTCTTATTGCTATTATTAGGATTGATTCTAATTTAGTTCAAAATATTTTAAAGAATTTTAATATCTCATTAACCAATTTTTTAGATAAATTCCACGTAGCCATAAATAAAATATCAAAAAGT…	MNVLYIFIAVLILNGILNIHVSKKKTSFLNNTYPINKYKTINIKRHYRKVQNRNNKLYVSLFDEYDEKCIKALIMAREVAKNDNENEILLKHLLIAIIRIDSNLVQNILKNFNISLTNFLDKFHVAINKISKSYTNSNNGHNNIYEQSGSAQNNLNEQEKKNISLTNEEIDMKNILNEEDENQVENRKQNENGNVNGNGNVNENVNENINENEKLLNDFINKHLKDMEEKINILKNLNNEEDNASLDDINNKDYIINDISSSNNITKENNNNNNNNNNNNDKGNFNNLDTNNDSGNLSNNVPKNESHNVLHNHTYKINNNNKMMNQEILGNPNFDIKFSENCKLVLHNAVLEAKRKRKIFVNIIDILLSIINIAQEKKHYDFLKYIEELNININDLKSL…	1341	1	HMM: MNVLYIFIAVLILNGI, NN: MNVLYIFIAVLILNGILNIHVSK	yes	GO_0005524	GO_0004252	GO_0005524,GO_0004252	0	0	0	0	0	0	0	0	0	0	0	0	0	0	0	0	0	0	0	0	0	0	0	0	0	0	0	0	0	0	0	0	0	0	0	0	0
904	PF3D7_0507500	subtilisin-like protease 1	SUB1	ATGATGCTCAATAAAAAAGTTGTTGCTTTGTGCACACTTACCTTACATCTTTTTTGTATATTTCTATGTCTAGGAAAGGAAGTAAGGTCTGAAGAAAATGGGAAAATACAAGATGATGCTAAAAAGATTGTTAGCGAATTACGATTCCTAGAAAAAGTAGAAGATGTTATTGAAAAGAGTAACATAGGAGGGAATGAGGTAGATGCCGATGAAAATTCATTTAATCCGGATACTGAGGTTCCCATAGAAGAGATAGAAGAAATAAAAATGAGGGAACTGAAAGATGTAAAGGAAGAAAAAAATAAAAATGACAACCATAATAATAATAATAATAATATTAGTAGTAGTAGTAGTAGTAGTAGTAATACTTTTGGTGAAGAAAAAGAAGAAGTATCTAAG…	MMLNKKVVALCTLTLHLFCIFLCLGKEVRSEENGKIQDDAKKIVSELRFLEKVEDVIEKSNIGGNEVDADENSFNPDTEVPIEEIEEIKMRELKDVKEEKNKNDNHNNNNNNISSSSSSSSNTFGEEKEEVSKKKKKLRLIVSENHATTPSFFQESLLEPDVLSFLESKGNLSNLKNINSMIIELKEDTTDDELISYIKILEEKGALIESDKLVSADNIDISGIKDAIRRGEENIDVNDYKSMLEVENDAEDYDKMFGMFNESHAATSKRKRHSTNERGYDTFSSPSYKTYSKSDYLYDDDNNNNNYYYSHSSNGHNSSSRNSSSSRSRPGKYHFNDEFRNLQWGLDLSRLDETQELINEHQVMSTRICVIDSGIDYNHPDLKDNIELNLKELHGRKGF…	688	0	HMM: MMLNKKVVALCTLTLHLFCIFLCLGK, NN: MMLNKKVVALCTLTLHLFCIFLCLGK	yes	GO_0004252	GO_0004252, GO_0008236	GO_0004252,GO_0004252,GO_0008236	0	0	0	0	0	0	0	0	0	0	0	0	0	0	0	0	0	0	0	0	0	0	0	0	0	0	0	0	0	0	0	0	0	0	0	0	0
3106	PF3D7_1124600	ethanolamine kinase	EK	ATGGAATATCAACTAAGAGAAATTGATGAATCAGAGAAAGAAATAACTCAACAAAGAAAAAAGAATAGTGTCACTACAAAAAATTTCGATAATTTGTCAAATAGTAATTCTCAAATTACCGAAATGACAAACGAACAAGGTGTGATACCTTTGAGGGAAAAGGATTTAACAATAAATGTTGGGGATAATAGAAATTTAAAAGTAGAAGAATTTATGACTAATTTTATAAGTAATGTTTTTGAAAATAAGAATGCGTTGTTTTTATATTGTAAATATGTTTTATTATTTTATGGAAAAGAATTATTAAATGAAAATAATGTAGAATCTTTAAATTTTGAAATTATTAAAGGAGGGATAACAAATATATTGGTTAAGGTAGAGGATAATATTCATCAGAAC…	MEYQLREIDESEKEITQQRKKNSVTTKNFDNLSNSNSQITEMTNEQGVIPLREKDLTINVGDNRNLKVEEFMTNFISNVFENKNALFLYCKYVLLFYGKELLNENNVESLNFEIIKGGITNILVKVEDNIHQNKYLIRLYGPKTSEIINREREKLISNILCDKNISKKIYVFFPNGRIEEFKDGYALSREDIKNKDFQKEIAENLRILHDIQLDDTIYKKLQALQNIQGNRSSFLWSTLWKYFNTLKEERQKKYSFNPKAYILKLIDFDMLESIITEIQELCCKKNSPVVLCHCDLLSSNIIKTEGSSISFIDFEYSCPMERAYDIANHFNEYAGFNCEWDLTPNRSEEYHFIKHYLKTDDEQLINQLIDEIQPFYVCSHIVWGLWALLQGLHSVIDFD…	423	0	null	no	GO_0016772	GO_0004305	GO_0016772,GO_0004305	0	0	0	0	0	0	0	0	0	0	0	0	0	0	0	0	0	0	0	0	0	0	0	0	0	0	0	0	0	0	0	0	0	0	0	0	0
4352	PF3D7_1347700	ethanolamine-phosphate cytidylyltransferase	ECT	ATGAGTAACCAATTTTTAGTTGACACGATTTATAACCATGGATACATGAGAAAATTTCTTAGTATCTTGAGGAGTGTAAAAAAAAATGACAAGTTTCAATATATAATGAAGCTATGTGAAAATACAAATATAGAAGAAGATGAAGAATTATATAAGGTATTTATAAATGAGTTACATAACATAAGTAATACCTCTTCAACAAGAAGAAAAAAGAATGATAGTAGTTGTAATGAAAGTACTAATAATACTGGTAATAATAAAGAAAATGGAAGTAATAATACCCATTTTGAAGATATGAAAGATATTAATAGTTCAATATCTAACAATTCAGAGGAAATTAACGAATTTGAAATAGATTCTAGTACATCAACACAAGAAAAAACAAAAGAAACAAGGATA…	MSNQFLVDTIYNHGYMRKFLSILRSVKKNDKFQYIMKLCENTNIEEDEELYKVFINELHNISNTSSTRRKKNDSSCNESTNNTGNNKENGSNNTHFEDMKDINSSISNNSEEINEFEIDSSTSTQEKTKETRIYVDGIFDLSHSGHFNAMRQAKKLGDIVVVGINSDEDALNSKGVKPIYTQEERGALIAGCKWVDEVIIGTKYNVDMDLLEKYNCDYAAHGTDLAYDKNGTCCYEEVRKFNKLKIFERSYGISTTTIINHLLQAVNNSNYYSSSNNNNNNNNNNNTLVNSNNNNNNNDTNSVSTNEISDINNETNYVYNTNTNSEQLDNFNKNKDNPNILEITEEQIYNSELGISDDNKTKVSEQQHDIDTLPKNLLNRNRCHITTSQIYQFIDNNEL…	573	0	null	no	GO_0003824	GO_0004306	GO_0003824,GO_0004306	0	0	0	0	0	0	0	0	0	0	0	0	0	0	0	0	0	0	0	0	0	0	0	0	0	0	0	0	0	0	0	0	0	0	0	0	0
1426	PF3D7_0628300	choline/ethanolaminephosphotransferase, putative	CEPT	ATGGGGATTCTTTTTAAATTAAATAAAAGTGTTTATTCAAATTGTAAATCTTATGTTTATAAGAGTGGAGGGAATTCACTCCTTGACAATCTTTTTGATGCTTTCTGGAATATTTGTGTAAAATTCGTACCAAAGTCCATAACACCAAACCTCTTAACATTATTAGGATTCTTATGTTCAACAATTGCTTTTGTTCTTACATTTGTTTTTGATTCTCAAAATAAAAAATATGATTATATCTACATATATGCAGGAATCTTTTTATTCATATACCAAACATTTGATGCCCTTGATGGAAAACAAGCTAGAAAAACTAATACAAGTTCACCTTTGGGACAATTATTTGATCATGGATGTGATTCAATAACAACGTCCTTCTTTGTTTTTATTGCTTGCAAG…	MGILFKLNKSVYSNCKSYVYKSGGNSLLDNLFDAFWNICVKFVPKSITPNLLTLLGFLCSTIAFVLTFVFDSQNKKYDYIYIYAGIFLFIYQTFDALDGKQARKTNTSSPLGQLFDHGCDSITTSFFVFIACKAAGFPKSLIYYILLAIVQIQGYMFSWMEYHTKVFNTSVGKIGTTESHVLVITMCILRGLKGAGVFQRTTLKDILPKSISSVLCKCVLSVTMNYVILIPVIFFIILSISRCTYIGMQNAKKKKSEAIMQLAVVYIFSLMQYYFYYTNVTPKTELICFSIIALYSCFYNLFINLSTILKIKMDLIPVPVIFYYLSILLIFLKRNTKYKFLKHPLLKDSYILYYILFFGIIYLLDYAHTIITNICKELNITFIFNKKYKKK	391	8	null	no	GO_0016780	GO_0004307	GO_0016780,GO_0004307	0	0	0	0	0	0	0	0	0	0	0	0	0	0	0	0	0	0	0	0	0	0	0	0	0	0	0	0	0	0	0	0	0	0	0	0	0
1406	PF3D7_0626300	3-oxoacyl-acyl-carrier protein synthase I/II	FabB/FabF	ATGAGAAAATACATTATAAAAATATATTATTTCCTGTTCTTTTATGTGCTACAAGTTAACAGTAAAAGGTATGCCTTCATTAAAAGGGGTATACCTGGAATATCCAAGAATTATTTTAAAGGTTTCAAGTTGTACAATTCGAGAGAAATGAAAAATCTTTGTGAAACTTCTAGAGTGGTGTGCACAGGTGTAGGGGTAGTAACTGGATTAGGGATTGGCATAGAACATTTTTGGAATAATATTATAAATGGATATACATCAATAGATAAAATTACAAAATTTGATATAACCGGTATGTCATGTGGTATTGGTAGTGAAATAAAGAAAAGCGATTTTAATCCTAGTGATTATTACACAAATAAAAAAGATGTTAATCGTAATGATGATTGTACTCATTAT…	MRKYIIKIYYFLFFYVLQVNSKRYAFIKRGIPGISKNYFKGFKLYNSREMKNLCETSRVVCTGVGVVTGLGIGIEHFWNNIINGYTSIDKITKFDITGMSCGIGSEIKKSDFNPSDYYTNKKDVNRNDDCTHYAVAATRLALDDAKLNLEKLDKDKTGTIIGSGIGGLRFLEKEMKTMYEKGHKRITPYLIPAMIANTPSGYVSIENNIRGISLGMLSACATSGNTIGEAYRYIKYKEYDVMICGGTEASITPISFAGFNSLKALCTGYNDNPKKGCRPFDLKRSGFVMGEGSGILILESYEHAIKRNAPIYGEIISYSSECDAYHITAPEPNGKGLTNSIHKALKNANININDVKYINAHGTSTNLNDKIETKVFKNVFKDHAYKLYISSTKSMTGHC…	473	0	HMM: MRKYIIKIYYFLFFYVLQVNSK, NN: MRKYIIKIYYFLFFYVLQVNSK	yes	GO_0003824, GO_0016747	GO_0004315, GO_0004312	GO_0003824,GO_0016747,GO_0004315,GO_0004312	0	0	0	0	0	0	0	0	0	0	0	0	0	0	0	0	0	0	0	0	0	0	0	0	0	0	0	0	0	0	0	0	0	0	0	0	0
4519	PF3D7_1364900	ferrochelatase	FC	ATGGACGTACAGGATTTTCTGAATTGTAACAAATTAAAAATATCAAAAGAGAAAATTAGCAACCTTAATAAAAGTAAAATAGGAATACTGATTACAAATTTAGGAAGCCCAGAAAAACTAACCTACTGGTCTTTATATAAATATTTATCGGAATTTTTGACTGATCCTCGAGTTGTAAAATTGAACAGGTTTTTATGGCTTCCAATATTGTACACATTTGTATTACCTTTCAGGAGTGGCAAAGTCTTATCAAAATATAAAAGTATATGGATAAAAGATGGATCACCATTATGTGTTAATACTCATAATCAGTGTTTAGCTTTAAAGAAGATTCTAAACGAAAAGTACAATAACAAAGTTGTCATTAGTTATGGTATGAGATATGGAGAAAGGTCCATA…	MDVQDFLNCNKLKISKEKISNLNKSKIGILITNLGSPEKLTYWSLYKYLSEFLTDPRVVKLNRFLWLPILYTFVLPFRSGKVLSKYKSIWIKDGSPLCVNTHNQCLALKKILNEKYNNKVVISYGMRYGERSIKKGLEYLQKENINKLLVLPLYPQSAECTVSSTLDCIGKNLKNWSNVPELRFISGYCLKDIFINTMKENIENYWELYGKSKKLIISYHSLPIRNVIQGDLYPFFCIESTKKLVKSLNLNKDDYILVFQSKIKGQQWVKPCIEDTIIRLAKQGYKQIDIVSPSFSSDCLETLEEIKIHYQQLFRKYSNGNLRYINCLNDTTIGIKLIMNLIEQNIIGWV	350	0	null	no	GO_0004325	GO_0004325, GO_0008198	GO_0004325,GO_0004325,GO_0008198	0	0	0	0	0	0	0	0	0	0	0	0	0	0	0	0	0	0	0	0	0	0	0	0	0	0	0	0	0	0	0	0	0	0	0	0	0
4935	PF3D7_1436000	glucose-6-phosphate isomerase	GPI	ATGAATATGGAGATTACAAATTTGAAGAGCTATAAGGAACTTGTCACCTTAAGCGCTGAAGAAAAAACAAAGGATCTAAAGGACTATTTAAATGATAAGAATAGATCTGAATCGTTAATAAAGAAGTTTAAGAATTTTTATATGGATTTATCTCGTCAAAGGTATAGCGAAAAGACTTTAAACAAATTAGTTGAATATGCTGAAGAGGTAGAATTAAAGAAGAAGGTTGAAAAAACATTTATGGGAGAAAAAGTTAATATGACAGAGAATCGCAGTGTTTTACATACAGCTTTAAGAATACCCATAGAGAAAATAAATACACATAAAATAATAATTGATAATAAGAATGTGTTAGAAGACGTACATGGAGTATTAAAAAAAATAGAGAAATATTCAGAT…	MNMEITNLKSYKELVTLSAEEKTKDLKDYLNDKNRSESLIKKFKNFYMDLSRQRYSEKTLNKLVEYAEEVELKKKVEKTFMGEKVNMTENRSVLHTALRIPIEKINTHKIIIDNKNVLEDVHGVLKKIEKYSDDIRNGVIKTCKNTKFKNVICIGIGGSYLGTEFVYEAMKYYYYNMELNKNEKDQVNNFNNNYDQDNVFNVRFLANVDPNDVNRAIQNLDQYDTLVIIISKTFTTAETMLNARSIKKWLSLKIKDDENLSKHMVAVSTNLKLTDEFGISRDNVFEFWDWVGGRFSVTSSVGILPLSIAFGYKNMRNFLNGCHDMDEHFLHADLKENIPVLLALTSFYNSHFFDYKNVAILPYFQNLLKFSAHIQQLSMESNGKSVDRNNQPIHYNTCQ…	579	0	null	no	GO_0004347	GO_0004347	GO_0004347,GO_0004347	0	0	0	0	0	0	0	0	0	0	0	0	0	0	0	0	0	0	0	0	0	0	0	0	0	0	0	0	0	0	0	0	0	0	0	0	0
1778	PF3D7_0802000	glutamate dehydrogenase, putative	GDH3	ATGGATATTGATAGAAGGTCGGCATTAAGTTGCTCCCCCAATAACATGGAGTGCGGATTCGGTAGCGGGCATTTTTCTAATAACAGTATTACGTGGAAAGAGAAATATGAACAGACTAAAGAATTGTTGAAGAGTTATAATTTATTTTCAGATCATTTAATAAATTATAGTATCGATTTTTATTTTAACAAGTTAGGATTTAACAAGTTTCATTTTGAAGAGACAAGCCCCGAGTTGATTAGTAAAGTGGTTGTGTGTATTATAACTGCCAAGATTAATGAACAGTATTCTAGTGATAAATATTTTCCTACTTTCGAAGAGACCCATGACAATGTAATATTTATAATAACAAGAGTATTTGCTGATGATAATAAAACAAGATTAAATTATAAGATGGAG…	MDIDRRSALSCSPNNMECGFGSGHFSNNSITWKEKYEQTKELLKSYNLFSDHLINYSIDFYFNKLGFNKFHFEETSPELISKVVVCIITAKINEQYSSDKYFPTFEETHDNVIFIITRVFADDNKTRLNYKMEKKIEEKYFNFSDMSKDCYRLKSFRSVHSVFDKEHTYQEPLRTYILELPTYNDDIIKENETDLKKLMDVNFYNYIKGTRSEQIYYELNKAVLYDLTGQFLQTHYYETSSSTFTLTIAVKRSNVISSIFSLIGDCLNMHRCFSYSKYVEPLKNGVLLIILNVKVIVNNEMEREKQKLDLKDKIYKVVKSLKTLCLFNDSKFIQLSVKRTFTAQESAYLFMIIKFITFFSTNTLSSYKNVEHALNLRNYNNNIMDTTTNSSSSPSSVLN…	1397	0	null	no	GO_0016491	GO_0004352	GO_0016491,GO_0004352	0	0	0	0	0	0	0	0	0	0	0	0	0	0	0	0	0	0	0	0	0	0	0	0	0	0	0	0	0	0	0	0	0	0	0	0	0
4754	PF3D7_1416500	NADP-specific glutamate dehydrogenase	GDH1	ATGAGTGCTCTTAAAGACAAAACGGGAAGGTTTGTTGTTCTGGATAAAAATGCTAGCAACTATGAATCTTTAGTCGATCAAGAAATGAATAACGTATATGAAAGAGTTATGAAATTGGATCCTAACCAAGTTGAATTTTTGCAAGCATTTCATGAAATATTATATTCTTTAAAACCATTATTTATGGAAGAACCTAAATATTTACCAATAATTGAAACGTTATCAGAACCTGAACGAGCAATACAATTTCGTGTTTGTTGGTTAGATGATAATGGTGTTCAAAGAAAAAATCGTTGTTTTCGTGTTCAATATAATAGTGCCTTGGGTCCTTACAAAGGTGGTTTACGATTTCATCCATCAGTTAATTTATCTATTGTAAAATTTTTAGGATTTGAACAA…	MSALKDKTGRFVVLDKNASNYESLVDQEMNNVYERVMKLDPNQVEFLQAFHEILYSLKPLFMEEPKYLPIIETLSEPERAIQFRVCWLDDNGVQRKNRCFRVQYNSALGPYKGGLRFHPSVNLSIVKFLGFEQIFKNSLTGLSMGGGKGGSDFDPKGKSDNEILKFCQAFMNELYRHIGPCTDVPAGDIGVGGREIGYLYGQYKKIVNSFNGTLTGKNVKWGGSNLRVEATGYGLVYFVLEVLKSLNIPVEKQTAVVSGSGNVALYCVQKLLHLNVKVLTLSDSNGYVYEPNGFTHENLEFLIDLKEEKKGRIKEYLNHSSTAKYFPNEKPWGVPCTLAFPCATQNEINLEDAKLLQKNGCILVGEGANMPSTVDAINLFKSNNIIYCPSKAANAGGVA…	470	0	null	no	GO_0016491, GO_0016639	GO_0004354	GO_0016491,GO_0016639,GO_0004354	0	0	0	0	0	0	0	0	0	0	0	0	0	0	0	0	0	0	0	0	0	0	0	0	0	0	0	0	0	0	0	0	0	0	0	0	0
4881	PF3D7_1430700	NADP-specific glutamate dehydrogenase	GDH2	ATGATTTTGTATTCATGTGTTGTTTGTTTTATTGTTTTTGTTTTTCATGTGAAGGCATATTCCAAAAATAAAGTTCTTAAATATGCTAAACCAGGTTTTATTACAAATGAAATTGATATAGGGGCGTATGCAAAGAGAAGAGGAAAAAGTAGACTAGGTAGTCTACACAACTACGGCTATACTTCTACCAAATCTGTAGATAACCAAATTGAAGAATTACGAGAAAAGGTTGTATCTAAAAATAAAAACGAACCAGAATTTCTTCAAGCGTTTGAAGAAGTATTATCATGTTTAAAGCCAGTGTTTAAAAAAGACAATGTATATATAGGAGTACTAGAAAATATCGCCGAACCAGAAAGGGTAATTCAATTTCGTGTACCTTGGATAAATGATAAAGGA…	MILYSCVVCFIVFVFHVKAYSKNKVLKYAKPGFITNEIDIGAYAKRRGKSRLGSLHNYGYTSTKSVDNQIEELREKVVSKNKNEPEFLQAFEEVLSCLKPVFKKDNVYIGVLENIAEPERVIQFRVPWINDKGEHKMNRGFRVQYNSVLGPYKGGLRFHPTVNLSVIKFLGFEQIFKNSLTTLPMGGGKGGSDFDPKGKSENEILKFCQSFMTNLFRYIGPNTDVPAGDIGVGGREIGYLFGQYKKLKNSFEGVLTGKNIKWGGSNIRAEATGYGVVYFAENVLKDLNDNLENKKCLVSGSGNVAQYLVEKLIEKGAIVLTMSDSNGYILEPNGFTKEQLNYIMDIKNNQRLRLKEYLKYSKTAKYFENQKPWNIPCDIAFPCATQNEINENDADLFIQ…	510	0	HMM: MILYSCVVCFIVFVFHVKAY, NN: MILYSCVVCFIVFVFHVKAYSK	yes	GO_0016491, GO_0016639	GO_0004354	GO_0016491,GO_0016639,GO_0004354	0	0	0	0	0	0	0	0	0	0	0	0	0	0	0	0	0	0	0	0	0	0	0	0	0	0	0	0	0	0	0	0	0	0	0	0	0
3020	PF3D7_1116200	pyridoxine biosynthesis protein PDX2	PDX2	ATGTCAGAAATAACTATAGGGGTATTATCACTACAAGGTGATTTTGAACCGCATATAAATCATTTTATCAAATTACAAATACCGTCGTTAAATATTATCCAAGTAAGAAATGTTCATGATTTGGGACTATGTGACGGGCTTGTAATTCCAGGTGGAGAATCCACAACTGTACGTCGATGTTGTGCTTATGAAAATGATACCTTATATAATGCTTTAGTACATTTCATTCATGTGCTAAAAAAGCCAATTTGGGGCACTTGTGCAGGTTGTATTCTCTTATCTAAGAATGTAGAAAATATAAAACTTTATAGCAATTTTGGAAATAAATTTTCTTTTGGAGGATTGGATATAACTATATGTAGAAATTTTTATGGATCACAAAATGATAGTTTTATATGC…	MSEITIGVLSLQGDFEPHINHFIKLQIPSLNIIQVRNVHDLGLCDGLVIPGGESTTVRRCCAYENDTLYNALVHFIHVLKKPIWGTCAGCILLSKNVENIKLYSNFGNKFSFGGLDITICRNFYGSQNDSFICSLNIISDSSAFKKDLTAACIRAPYIREILSDEVKVLATFSHESYGPNIIAAVEQNNCLGTVFHPELLPHTAFQQYFYEKVKNYKYS	219	0	null	no	GO_0016740	GO_0004359	GO_0016740,GO_0004359	0	0	0	0	0	0	0	0	0	0	0	0	0	0	0	0	0	0	0	0	0	0	0	0	0	0	0	0	0	0	0	0	0	0	0	0	0
2716	PF3D7_1025100	glutamine--fructose-6-phosphate aminotransferase [isomerizing], putative	GFPT	ATGAATTTTAAATTCAAAACAGTAATACACAATTTAAAAAGTAAATTCAAACATGAATTTGTGTCTGATAAAAAGCAATTATATTTTTGTAATATTATGAAAAATAAATATAATGTATATGAAAATATTGGGTTTTTAAATTATGGTTGTTCAATTAAAAAATATTTATTTTACAATCGTAAAGAAGATCAAGATGAGGAATTTAAAGGTTCATTTAAAAATGGGACAATGAACGGTCTTAAAATATGGAAATATAATAATATATCATCACAAAAAGATACATATAATAATATATCATCACAAAAAGATACATATAATAATATATCATCACATAAAAATACATATAATAATATATCATCACATAAAAATACATATAATAATGTATCATCACATAAAAAT…	MNFKFKTVIHNLKSKFKHEFVSDKKQLYFCNIMKNKYNVYENIGFLNYGCSIKKYLFYNRKEDQDEEFKGSFKNGTMNGLKIWKYNNISSQKDTYNNISSQKDTYNNISSHKNTYNNISSHKNTYNNVSSHKNTYNNISSHKDTYNKYYYALFNNNIFNQKKLYIFFMAICLALNKFLNTQEENNENNNSLKKKKKKKIMNSHFFGLSNETASCCGIMAYMGNRDASKILIDGIEILQNRGYDSCGMSTISNKNVLKTTKYASNTTCDAIEKLKSNYLNSHKNDHIGIAHTRWATHGCKTDENAHPHVDYGERISIVHNGIIENYREIKTFLLKNNIPFKSNTDTEVVANLIGYFLDKKQSFQDAVLSAITQLEGTWSFCIIHKNHPDEMILASNGSPL…	829	0	null	no	GO_0030246, GO_0097367, GO_0004360	GO_0004360	GO_0030246,GO_0097367,GO_0004360,GO_0004360	0	0	0	0	0	0	0	0	0	0	0	0	0	0	0	0	0	0	0	0	0	0	0	0	0	0	0	0	0	0	0	0	0	0	0	0	0
4781	PF3D7_1419800	glutathione reductase	GR	ATGGTTTACGATTTAATTGTAATTGGTGGTGGAAGTGGAGGAATGGCTGCAGCTAGGAGGGCAGCAAGGCATAACGCAAAAGTTGCTCTTGTCGAAAAATCCCGTTTAGGTGGAACGTGTGTCAACGTTGGATGTGTTCCTAAAAAAATTATGTTCAATGCTGCCTCAGTTCATGATATTTTGGAAAATTCCAGGCATTACGGATTTGACACCAAATTTTCGTTCAACTTACCTCTGTTGGTAGAGAGAAGGGATAAGTACATTCAAAGGTTGAATAATATTTATAGACAGAATTTAAGTAAGGATAAGGTAGATTTGTACGAAGGAACAGCTAGCTTTTTAAGCGAAAATAGGATATTAATAAAAGGCACAAAAGATAATAATAATAAGGATAATGGG…	MVYDLIVIGGGSGGMAAARRAARHNAKVALVEKSRLGGTCVNVGCVPKKIMFNAASVHDILENSRHYGFDTKFSFNLPLLVERRDKYIQRLNNIYRQNLSKDKVDLYEGTASFLSENRILIKGTKDNNNKDNGPLNEEILEGRNILIAVGNKPVFPPVKGIENTISSDEFFNIKESKKIGIVGSGYIAVELINVIKRLGIDSYIFARGNRILRKFDESVINVLENDMKKNNINIVTFADVVEIKKVSDKNLSIHLSDGRIYEHFDHVIYCVGRSPDTENLNLEKLNVETNNNYIVVDENQRTSVNNIYAVGDCCMVKKSKEIEDLNLLKLYNEETYLNKKENVTEDIFYNVQLTPVAINAGRLLADRLFLKKTRKTNYKLIPTVIFSHPPIGTIGLSEE…	500	0	null	no	GO_0050660, GO_0016491	GO_0004362	GO_0050660,GO_0016491,GO_0004362	0	0	0	0	0	0	0	0	0	0	0	0	0	0	0	0	0	0	0	0	0	0	0	0	0	0	0	0	0	0	0	0	0	0	0	0	0
4776	PF3D7_1419300	glutathione S-transferase	GST	ATGGGAGATAATATAGTGTTATATTATTTTGATGCAAGGGGTAAAGCTGAATTGATAAGATTAATTTTTGCCTACCTTGGAATAGAATATACAGATAAAAGATTTGGAGTAAACGGTGATGCTTTTGTTGAATTTAAAAATTTTAAAAAAGAAAAGGATACTCCTTTTGAGCAAGTACCCATATTACAAATTGGAGATTTGATATTAGCTCAAAGCCAAGCTATAGTTCGTTATTTATCAAAAAAATATAATATATGTGGTGAAAGTGAATTGAATGAATTTTATGCAGATATGATATTTTGTGGTGTTCAGGATATTCATTATAAATTTAATAATACCAATTTATTTAAACAAAATGAAACAACTTTTTTAAATGAGGATTTACCAAAATGGTCAGGT…	MGDNIVLYYFDARGKAELIRLIFAYLGIEYTDKRFGVNGDAFVEFKNFKKEKDTPFEQVPILQIGDLILAQSQAIVRYLSKKYNICGESELNEFYADMIFCGVQDIHYKFNNTNLFKQNETTFLNEDLPKWSGYFEKLLKKNHTNNNNDKYYFVGNNLTYADLAVFNLYDDIETKYPSSLKNFPLLKAHNEFISNLPNIKNYITNRKESVY	211	0	null	no	GO_0005515	GO_0004364	GO_0005515,GO_0004364	0	0	0	0	0	0	0	0	0	0	0	0	0	0	0	0	0	0	0	0	0	0	0	0	0	0	0	0	0	0	0	0	0	0	0	0	0
4263	PF3D7_1338300	elongation factor 1-gamma, putative	EF-1gamma	ATGGATTTTAAATTACTTGCTCCCAAAAATGACGTCAGAACTTTGAAGGTTCAAACAGTAGCATCATTTTGCAATGTGAAATTAAATATGCCGAACTTTGAACTTGGTAAAGATAACAAGACAGCCGATTTTTTAAAACACTCTCCGCTAGGTAGGTTGCCTGTTTTGGTTACGTCTCATGGTTCTATTTTTGAAAGTAATGCTGTTTGTAAATACCTTTGTAGTATTCATAGAGAAGGGGATTATTTAGGTAAGGGTTCTTTTGAAGAAGCACAAGTAAATATGTGGGTAGATTTCAACACATACGAATTAGAAATTCCTATGACTTGTTATATGAATAATAAATCCTGTGAGAAATCTTTAAAACATATAGAAGATACTTTAAAATGTTATAATAAT…	MDFKLLAPKNDVRTLKVQTVASFCNVKLNMPNFELGKDNKTADFLKHSPLGRLPVLVTSHGSIFESNAVCKYLCSIHREGDYLGKGSFEEAQVNMWVDFNTYELEIPMTCYMNNKSCEKSLKHIEDTLKCYNNHLLYNQYMVGNSITIADIFISVILYFSLNSGALNESIVLKYKNLYRLYDTISNQKQFKYVFACDQNKKKNTQDKSTGAKKKQGNNKKDDNNNNNNNDADNQHADLLSDDLAEKKQPKKTNPLDLLPPSNFSLDEWKYKFSNEKDLLNNAMPHFWKTYDPNGFSLYYMKYDKLEDECQISFVACNMAGGFLQRLENNFSKYSFAVVTVLGENKSYDIEGVWLFRGTDIPFEMKDHPSFEYHIFKKLDINNTQDKKIVEEYWCSKETV…	411	0	null	no	GO_0005515, GO_0003746	GO_0004364, GO_0003746	GO_0005515,GO_0003746,GO_0004364,GO_0003746	0	0	0	0	0	0	0	0	0	0	0	0	0	0	0	0	0	0	0	0	0	0	0	0	0	0	0	0	0	0	0	0	0	0	0	0	0
5202	PF3D7_1462800	glyceraldehyde-3-phosphate dehydrogenase	GAPDH	ATGGCAGTAACAAAACTTGGAATTAATGGATTTGGTCGTATCGGACGTTTAGTATTTAGAGCAGCCTTTGGAAGGAAAGATATCGAAGTAGTTGCTATTAACGACCCATTTATGGACCTTAACCACTTATGCTATCTCTTGAAATACGATTCAGTACATGGTCAATTTCCATGTGAGGTAACCCACGCTGATGGATTTTTATTAATCGGAGAAAAGAAAGTCAGTGTTTTTGCTGAAAAGGATCCATCTCAAATTCCTTGGGGAAAATGCCAAGTAGATGTTGTATGTGAATCAACTGGTGTATTTTTAACCAAAGAATTAGCTAGCAGTCACCTTAAGGGAGGAGCCAAGAAGGTTATTATGTCCGCCCCACCAAAGGATGACACCCCAATTTATGTT…	MAVTKLGINGFGRIGRLVFRAAFGRKDIEVVAINDPFMDLNHLCYLLKYDSVHGQFPCEVTHADGFLLIGEKKVSVFAEKDPSQIPWGKCQVDVVCESTGVFLTKELASSHLKGGAKKVIMSAPPKDDTPIYVMGINHHQYDTKQLIVSNASCTTNCLAPLAKVINDRFGIVEGLMTTVHASTANQLVVDGPSKGGKDWRAGRCALSNIIPASTGAAKAVGKVLPELNGKLTGVAFRVPIGTVSVVDLVCRLQKPAKYEEVALEIKKAAEGPLKGILGYTEDEVVSQDFVHDNRSSIFDMKAGLALNDNFFKLVSWYDNEWGYSNRVLDLAVHITNN	337	0	null	no	GO_0051287, GO_0050661, GO_0016620	GO_0004365, GO_0005515	GO_0051287,GO_0050661,GO_0016620,GO_0004365,GO_0005515	0	0	0	0	0	0	0	0	0	0	0	0	0	0	0	0	0	0	0	0	0	0	0	0	0	0	0	0	0	0	0	0	0	0	0	0	0
4066	PF3D7_1318200	glycerol-3-phosphate 1-O-acyltransferase	G3PAT	ATGATTAAATTTTCTGTTCTTTCCTTTTTAACAACATTATTTCTTGTTGTACTTAAATTCCATGTTGTAAAGAATGTAAAAAATAAATCATGTTTCCTAAATACGTTTGGTGTATCTCCTATTGTAACAAAGCTATTTCCTAAATATATAGATAAAAGTATAAATAGAAAAGTTCCTATTACATGTAAAAAAAGTAAAATTATAACATTTTTAAATAATAATATATATGAAGATGCCTACGATAGAATAATGAACAAATTAGATTTATTGATAAAAGAGAGTTATGATATTACAGATCATATTAATACTTTTAAAGGTTTTTTAAGGAAATATCTATATGAAATAAAAAAGCATAAATCTTGTTCTTCACAAGATTTCTTAAATAATTTTCTAATTTAT…	MIKFSVLSFLTTLFLVVLKFHVVKNVKNKSCFLNTFGVSPIVTKLFPKYIDKSINRKVPITCKKSKIITFLNNNIYEDAYDRIMNKLDLLIKESYDITDHINTFKGFLRKYLYEIKKHKSCSSQDFLNNFLIYIDTFKKYQNYEFPNIHRYDQTLYEWSLKFWSELIDKKNSKFLGISNIKKIEEWRDKGHNIIIFSNHHIEADANIIKYFFHIQDSEQISRNIIFIGGHKIRVDPLSRPFSVTANLLCIYSKKYIENPPHLKEEKTLFNHKSLNVLRNLLNKGKQIIWLAPSGGRDRKGADGKIHISPFDPKIIQTFNVFAKRSKVKTHFIGLALNTYNICPPPNTIDVDEIEKERTCNYSPVYLNLGQDIFDLYPNMDEGQITTYLYNYVNQLYKQIS	400	0	HMM: MIKFSVLSFLTTLFLVVLK, NN: MIKFSVLSFLTTLFLVVLKFHVVKNV	yes	GO_0004366, GO_0016746	GO_0004366	GO_0004366,GO_0016746,GO_0004366	0	0	0	0	0	0	0	0	0	0	0	0	0	0	0	0	0	0	0	0	0	0	0	0	0	0	0	0	0	0	0	0	0	0	0	0	0
3006	PF3D7_1114800	glycerol-3-phosphate dehydrogenase, putative	G3PDH	ATGTTGAAATTTTTCATTTTATATTTCTACCTTATATTTCAAGCAATTACATGTTTTTCTGTAAATCAGATTAATGTAGGAAATAAATATTCTCTGATAAGAAATCCTCAAAGTAATGTACCATTAAAGGTATCTATTATTGGTAGTGGGAATTGGGGAACAGTCGTTTCAAAAATTATTGGAATGAACGCTCAAAAGTTAAAAATATTTCATCCAATTGTTAAAATGTATGTTAAAGAAGAAATTGTGGAGGAAGAAAAACTATCTGATATTATCAATAAAAAGAAAGAAAACATAAAATATATGAAAGGAATGAAAATTCCTGAAAATATTCTAGCCATTTCAAACTTGAAGGAAGTTATTGATGATGCAGATTTGTTAATATTTGTATTACCACAC…	MLKFFILYFYLIFQAITCFSVNQINVGNKYSLIRNPQSNVPLKVSIIGSGNWGTVVSKIIGMNAQKLKIFHPIVKMYVKEEIVEEEKLSDIINKKKENIKYMKGMKIPENILAISNLKEVIDDADLLIFVLPHQYLDNVLDEIVQNNNLKKNARAISLIKGIKMVRSKPQLLSDIIEKKLDIECLALSGSNIAEELSREHFSESTIGFEKKGNEVIWQNLFDRTYFKVNCIQDKPGVEICGALKNVIALGVGFIDGLTASYNTKSAIIRIGLEEMKKFAKMFFPNVLDETFLDSCGLADLITTCLGGRNFKCAKEFAKRKGRDSWELIEAELLNGQKLQGIDTTKEVYDVLEYHQLKTEFPLICTIYEISFQKKNPCSIIDVLSTKKLRNIKYK	394	0	HMM: MLKFFILYFYLIFQAITCF, NN: MLKFFILYFYLIFQAITCFSV	yes	GO_0051287, GO_0004367, GO_0016616, GO_0042803	GO_0004367	GO_0051287,GO_0004367,GO_0016616,GO_0042803,GO_0004367	0	0	0	0	0	0	0	0	0	0	0	0	0	0	0	0	0	0	0	0	0	0	0	0	0	0	0	0	0	0	0	0	0	0	0	0	0
3516	PF3D7_1216200	glycerol-3-phosphate dehydrogenase [NAD(+)], putative	null	ATGTATAGAAACCTTTTTGACAAGTTGAAGGATGGTCCTCTGAAGATAAGTATTCTAGGAAGTGGTAACTGGGCTAGTGCCATTAGTAAAGTTGTTGGCACGAATGCCAAGAATAATTATTTATTCGAAAATGAAGTTAGGATGTGGATAAGAGATGAATTTGTAAATGGAGAAAGGATGGTCGATATAATTAATAATAAACATGAGAATACAAAATACTTAAAAGGTGTACCTTTACCTCATAATATTGTAGCTCATTCTGATTTAGCTAGTGTTATTAATGATGCTGATTTATTAATTTTTATCGTCCCATGTCAATATTTAGAAAGTGTGTTAGCCTCAATCAAAGAAAGTGAATCTATAAAAATAGCTAGCCACGCTAAAGCTATTTCTTTAACT…	MYRNLFDKLKDGPLKISILGSGNWASAISKVVGTNAKNNYLFENEVRMWIRDEFVNGERMVDIINNKHENTKYLKGVPLPHNIVAHSDLASVINDADLLIFIVPCQYLESVLASIKESESIKIASHAKAISLTKGFIVKKNQMKLCSNYISDFLNIPCSALSGANIAMDVAMENFSEATIGGNDKDSLVIWQRVFDLPYFKINCVNETIEVEICGALKNIITLACGFCDGLNLPTNSKSAIIRNGINEMILFGKVFFQKFNENILLESCGFADIITSFLAGRNAKCSAEFIKSTPKKTWEELENEILKGQKLQGTVTLKYVYHMIKEKNMTNEFPLFTVLHKISFENEDPSSLLKTFMNNKINQLNL	367	0	null	no	GO_0051287, GO_0004367, GO_0016616, GO_0042803	GO_0004367	GO_0051287,GO_0004367,GO_0016616,GO_0042803,GO_0004367	0	0	0	0	0	0	0	0	0	0	0	0	0	0	0	0	0	0	0	0	0	0	0	0	0	0	0	0	0	0	0	0	0	0	0	0	0
417	PF3D7_0306400	FAD-dependent glycerol-3-phosphate dehydrogenase, putative	null	ATGATTAAAAAAGTTGCTATTTGTAGTGGGACCTTGGGTATTTTATCCTATGGAGGGTTTTATTTTTTAAAAATAAATTTTCAAAAGAATATGATAGATAAAGATGTGACATATAAATATAGTCCTTGTATAAAAAGAAACGAAATGATTAAGAAGCTACAAGAAAATCAATATGATTTATTAATAATAGGAGGAGGTGCTACAGGTGCTGGTTTGGCCTTAGATGCAGCCACAAGAGGATTAAAATGTGCGCTAGTAGAAAAGAATGATTTTTCAAGTGGTACATCTTCTAAGTCTACCAAATTATTACATGGTGGTATAAGATATTTAGAAAATGCAGTAAATAATTTAGATTTTACAGAATTATATTTTGTATGGGAAGCATTAGCAGAAAGAGCG…	MIKKVAICSGTLGILSYGGFYFLKINFQKNMIDKDVTYKYSPCIKRNEMIKKLQENQYDLLIIGGGATGAGLALDAATRGLKCALVEKNDFSSGTSSKSTKLLHGGIRYLENAVNNLDFTELYFVWEALAERAHTMKIAPYLSRPVSILMPIYKYWQVPYFSYNIKIYDLLADLVCYFDKGVPNSLYIRKSNTIDNFPLLRKDKLKGSLIYFDGQHDDSRMNLNLILTSAIDNYVPGQIGATVCNHMEVKNFIKDENNKLVGVRAIDKINDKEIEIFSKVIINATGPYGDIIRKLADENRKPMIQVSVGCHFILPKWYSTKNNGMIIPKTSDDRVLFLLPWENNTLVGTTDEKRIMQDDPKIQEKDIEFLTNELSKYIHVSAEEIKNDITAAWCGFRPL…	653	1	null	no	GO_0016491	GO_0004368	GO_0016491,GO_0004368	0	0	0	0	0	0	0	0	0	0	0	0	0	0	0	0	0	0	0	0	0	0	0	0	0	0	0	0	0	0	0	0	0	0	0	0	0
3702	PF3D7_1235600	serine hydroxymethyltransferase	SHMT	ATGTTTAACAACGACCCTTTGCAAAAATATGACAAGGAGCTCTTTGATTTATTAGAAAAGGAAAAGAACAGACAAATAGAAACTATTAACCTTATAGCTTCAGAGAATTTAACAAACACAGCAGTACGTGAATGCCTTGGAGATAGAATAAGCAATAAATATTCCGAAGGTTATCCTCATAAAAGATATTATGGTGGGAATGATTATGTGGATAAAATAGAAGAGTTATGTTATAAAAGAGCTTTGGAAGCCTTTAATGTAAGTGAAGAAGAATGGGGTGTGAACGTACAACCGTTGTCAGGTTCAGCTGCGAATGTTCAAGCTTTATATGCCTTAGTAGGAGTTAAAGGTAAAATAATGGGTATGCATTTATGTTCAGGTGGTCATTTGACACATGGT…	MFNNDPLQKYDKELFDLLEKEKNRQIETINLIASENLTNTAVRECLGDRISNKYSEGYPHKRYYGGNDYVDKIEELCYKRALEAFNVSEEEWGVNVQPLSGSAANVQALYALVGVKGKIMGMHLCSGGHLTHGFFDEKKKVSITSDLFESKLYKCNSEGYVDMESVRNLALSFQPKVIICGYTSYPRDIDYKGFREICDEVNAYLFADISHISSFVACNLLNNPFTYADVVTTTTHKILRGPRSALIFFNKKRNPGIDQKINSSVFPSFQGGPHNNKIAAVACQLKEVNTPFFKEYTKQVLLNSKALAECLLKRNLDLVTNGTDNHLIVVDLRKYNITGSKLQETCNAINIALNKNTIPSDVDCVSPSGIRIGTPALTTRGCKEKDMEFIADMLLKAIL…	442	0	null	no	GO_0004372	GO_0004372	GO_0004372,GO_0004372	0	0	0	0	0	0	0	0	0	0	0	0	0	0	0	0	0	0	0	0	0	0	0	0	0	0	0	0	0	0	0	0	0	0	0	0	0
5134	PF3D7_1456100	serine hydroxymethyltransferase, putative	SHMT	ATGCTGAAGGAGTTTGTTAAAAATGTAAATGTTAGAAACCATAGATACATCAGTTTTTATTCTCTAAGAAATCAGAGCCGTTTAAATGATATAGATGATGAGACCTATAATATGTTAAAGAGTTATAAAAATAAGAATGATATAAATTTATCTCTTGTACATAATATAATGCCTACATATATGAAGGAATATTTAAGTATAGATTTAAATCGAAATATATTTGTGAATAATAAGAATATAGAAAATTTGGAATATATAGCCTTAAATTCATTTAATTTACAAAAGAAATATTGGGGTTGCCTTATTAGTAATGTTTCTCTTAATAATAATAAATCCATTGATGATTATTTTTTCATTAAATTGTATGGACATTTTTTAAAGAAGGAATGTAAAATATTA…	MLKEFVKNVNVRNHRYISFYSLRNQSRLNDIDDETYNMLKSYKNKNDINLSLVHNIMPTYMKEYLSIDLNRNIFVNNKNIENLEYIALNSFNLQKKYWGCLISNVSLNNNKSIDDYFFIKLYGHFLKKECKILRINYCLEQNIENNVSNDIMQNLYNIINIKNRNEPNYDEIQKISNDFNPDIIYFDESNNPYNIDYDRFIKGLKNKNNKIHNKPIIITNMNNKANLISQNLINSPFTHSDIVFTYFNENFRAHNSFVIFYKKGYKCVNTDGHIIEYDYEKKLKYAFDDIYLNNIFFSFFTSFKLMKNEEFKEYVKQIKENTYILYKYINRKYFHIQYSQNNSFFNLNPSSCTFNIQEFYLLCNKLNIYFDILKDKSSNQKSFNIGTNNLTSLGLLTHD…	462	0	null	no	GO_0004372	GO_0004372	GO_0004372,GO_0004372	0	0	0	0	0	0	0	0	0	0	0	0	0	0	0	0	0	0	0	0	0	0	0	0	0	0	0	0	0	0	0	0	0	0	0	0	0
3245	PF3D7_1138400	guanylyl cyclase	GCalpha	ATGTCAGATAGTAAAAAGCATTACAACGAATCTAATGTACGATATAAAGTGAAATATTCAGGAAAAATATTTGGTAATAATATGAAAAAATTAAATGAAAATAATAATCATGATTTTACAACTGCTGAAGCAGCATGGATGGAAAAGAAAAAGAAATTATATAAAGATACAAATAATCAACCTTTATGGGATTTTCGAAAAATTCAAATAAATCCAACAGAAACTGATGAATTAATTAGTTTTCCATCAAATAAAATATGCTCAAAAAATTACGGAAAATATTCATTTATATTTAAAGGATTATATGAACAATTTTTGAGATTACCAAATATATGGTTTTTATTAATTTCCTTATTAGAATTTATCCCACAATATCAAAATTTGAGTAATTATATGTAT…	MSDSKKHYNESNVRYKVKYSGKIFGNNMKKLNENNNHDFTTAEAAWMEKKKKLYKDTNNQPLWDFRKIQINPTETDELISFPSNKICSKNYGKYSFIFKGLYEQFLRLPNIWFLLISLLEFIPQYQNLSNYMYYSKHSSFFLLLFFICVSIIKNIYEDSRRSNIDYQINNRLCHMLDGPNSQLKAVRWMELSVGSIIRLIENEQVPADILLLSCNNSEGVVYIETSLLNGETNLNKKYCVNETRNETSIYAISNIRGRIVCEKPNSNMESFNGSLKLDAHPRATSLSINNVIFKGSHIKNTEYIFGVILYTGNDTKIMKNISNNKHKLGYVNKELNSYTIIGLIFTFICVFISVLFKWTEDDKFRNGSHFFLITVKDNICESIVKYTLLYSNIIPISIL…	4226	19	null	no	GO_0046872, GO_0000166, GO_0016849	GO_0004383	GO_0046872,GO_0000166,GO_0016849,GO_0004383	0	0	0	0	0	0	0	0	0	0	0	0	0	0	0	0	0	0	0	0	0	0	0	0	0	0	0	0	0	0	0	0	0	0	0	0	0
2372	PF3D7_0928900	guanylate kinase	GK	ATGAATAATATTTATCCCCTGGTTATTTGTGGTCCTTCGGGTGTTGGTAAAGGTACCTTGATAAAAAAGCTGTTGAATGAATTTCCAAATTATTTTTATTTTTCCGTAAGCTGTACGACAAGAAAAAAGAGAGAGAAAGAAAAAGAAGGTGTAGATTATTATTTCATAGATAAGACTATATTTGAAGATAAATTAAAAAATGAAGATTTTTTAGAATATGATAATTATGCTAATAATTTTTATGGAACATTAAAAAGTGAATATGATAAAGCAAAAGAACAAAATAAAATCTGCTTATTTGAAATGAATATTAATGGTGTCAAACAATTGAAAAAATCAACACATATAAAAAATGCTCTCTATATATTTATTAAACCACCAAGTACTGATGTACTCTTA…	MNNIYPLVICGPSGVGKGTLIKKLLNEFPNYFYFSVSCTTRKKREKEKEGVDYYFIDKTIFEDKLKNEDFLEYDNYANNFYGTLKSEYDKAKEQNKICLFEMNINGVKQLKKSTHIKNALYIFIKPPSTDVLLSRLLTRNTENQEQIQKRMEQLNIELHEANLLNFNLSIINDDLTLTYQQLKNYLLNSYIHLNNHTRN	199	0	null	no	GO_0004385, GO_0005515	GO_0004385, GO_0019206	GO_0004385,GO_0005515,GO_0004385,GO_0019206	0	0	0	0	0	0	0	0	0	0	0	0	0	0	0	0	0	0	0	0	0	0	0	0	0	0	0	0	0	0	0	0	0	0	0	0	0
455	PF3D7_0310500	ATP-dependent RNA helicase DHX57, putative	DHX57	ATGAACAATACGTTTAAGATAAATAAGAAGCGAAGAACAGTATACGAGTCATATAATATAATAAATATAGCTAATAAAAAACGATACATGTGTAATGATAATAAAATGGATAACGATAATAATATTATTAATGAAAAAAAATATTTTAATAATTCATCTTCAATAAAAAATACAGGAAATAATTATAAGAATGATAATATTGATAAATCGTATGATATGTGTGAAAGAAGAAGTATGATGGATAGAGATGAAAATATATATAATAATAATTATAAAAATAAAAATAGAAATAATTATAGTAATAAAAATAATTATAGTAATAATATAAACCATATGGATAATAGAAGAAATACTTATAAGGGAGATTTAGATGGAAGAAAACAATATTTAAGCAACAAA…	MNNTFKINKKRRTVYESYNIINIANKKRYMCNDNKMDNDNNIINEKKYFNNSSSIKNTGNNYKNDNIDKSYDMCERRSMMDRDENIYNNNYKNKNRNNYSNKNNYSNNINHMDNRRNTYKGDLDGRKQYLSNKHYESKNDNENSYNLKKYNFNIPPIKYNNNNNNNNNNNNNDRQNIDNNIYKFYDDKNEKKSNKTHSYGNNFNNEFNTFNDPKQNYMSNESHNMTQDGHPIYNHNNNNNDGRIKNRKDISLSSYGYNKISNDNLSKENTSYINQYNNSGGANRHVINAQHNNNQHNNNQHNNNFNYHNYKNAKPYQDKYKNGDSFKFSAYNAEQHDNMDKNYYQDIHKNNMKHSTKGDTAISFNGQKVFGSFKNKQMKEKRKFFKNKERGSSINRPGM…	2269	0	null	no	GO_0005524, GO_0003676	GO_0004386	GO_0005524,GO_0003676,GO_0004386	0	0	0	0	0	0	0	0	0	0	0	0	0	0	0	0	0	0	0	0	0	0	0	0	0	0	0	0	0	0	0	0	0	0	0	0	0
4018	PF3D7_1313400	DEAD box helicase, putative	null	ATGGAAAATTATATAAATAAAATATTGTTTTTGTTAATATTTTTCATATTTCATTTGAATAGTACAAAGAATTATAAAAAAACATACAGATATATTATTTCTTTCTTGCTTTATTTTATAAATATTTTATATGCTCAGAAGATTTGGGGAAATGGTAAGAAACAGATACGATGTTGTTTTATAAAAAATTTATATAATAATAATAGAGGCATATTTAGATTATTGGATAATGATATAAAAAGGAAATATAATATAATTTATTTAAAAAAGAAAAATAATGGATTTGCAAATAATGAACATGCATTTGTTAAAAATACTGTTTTTATTGAAAGGGGACAAAATGATGAAAATAAAATAAATTATGTTCAAGGTAATTTTGATGAAAATGTCAAAGATATT…	MENYINKILFLLIFFIFHLNSTKNYKKTYRYIISFLLYFINILYAQKIWGNGKKQIRCCFIKNLYNNNRGIFRLLDNDIKRKYNIIYLKKKNNGFANNEHAFVKNTVFIERGQNDENKINYVQGNFDENVKDIKYLSDMQKNFIYLLERNNNLLVHAKTSSGKTTICLYYLILKFFYNCEFIFKEDIEREEYIMKNDYIDRNIYESKNKSRKYFNQNKYRFIPYSEKYSEISDIKEYTNLMIENKCKTKLKKDEKVLILCPSKELCVQVAQNILSFMNNKNESLIKLFIDKDYKNENKEKQNFKEEECINKMEHIQINECDDHYMHHTSKHSVNNNKDTMDIEENKLYMLEHDNLNEDNSSSKVKKKNKINDNNNNSNNNSNNNSNNNNNNNSRSQLHH…	830	2	HMM: MENYINKILFLLIFFIFHLNSTK, NN: MENYINKILFLLIFFIFHLNST	yes	GO_0005524, GO_0003676	GO_0004386	GO_0005524,GO_0003676,GO_0004386	0	0	0	0	0	0	0	0	0	0	0	0	0	0	0	0	0	0	0	0	0	0	0	0	0	0	0	0	0	0	0	0	0	0	0	0	0
4826	PF3D7_1425400	DEAD/DEAH box helicase, putative	null	ATGAACAAGAATTGGATTAAGAATTTAGAAAATATAATTGACAAGAATAAAATATTTGAGTGGGATGAGAAGAAGAACGAGAAATTGAAAGATGTGTGTAAGAATTTTATAAAAAAGGATTATAGTATTCATCATTATGTTACGAATCCTATAATAATAGATAATTATAAGAAAGAAAAAATAAAAGAATTATATGAATGGCAAGATGAATGTTTAAGAGAATTAAGAAAAGTAAACTGGGAGAAAGGAGAGAATTTTATATGTGTAGCTCCAACATCTGGTGGGAAAACTTTAGTTACCGAATTATTTATATTTGAAGAGATAAAAAATGGCAAAAAACAAATATTTTTCTTATTTCCATTAAAATCATTAATAAATGAAAAAATGACATATTTAAAA…	MNKNWIKNLENIIDKNKIFEWDEKKNEKLKDVCKNFIKKDYSIHHYVTNPIIIDNYKKEKIKELYEWQDECLRELRKVNWEKGENFICVAPTSGGKTLVTELFIFEEIKNGKKQIFFLFPLKSLINEKMTYLKNICKGTNIRIGVEIEENDIILCTYEKFNNYLNKRKLYDDNKSDKYNIKSNISSNCTNNNNNNNNLENLKNDNIIVIIDEFHHINEKGRGIYIENIVSKILYMNKKRSRIKIICMSGTLNNISILKKWMKAKFYISTYRPQEIKEHYVCNFNVYKKVQDGKFYNTCNVFSFNDTCYDKNVQKNESASFQNQKFYETNMMNTSECSLQYLNKDNIYNNNNNIEMVGMNSSHVFMAGGQEERKQCSGHNKRSSYNRGRSYSYEPNNNNN…	1236	0	null	no	GO_0005524, GO_0003676	GO_0004386	GO_0005524,GO_0003676,GO_0004386	0	0	0	0	0	0	0	0	0	0	0	0	0	0	0	0	0	0	0	0	0	0	0	0	0	0	0	0	0	0	0	0	0	0	0	0	0
5025	PF3D7_1445200	ATP-dependent RNA helicase MAK5, putative	MAK5	ATGAAACAAACGAGTAACATGAATTTTAAGCCCCTTAAAATAAAACCTTCTCTACTTAAAGAGTTGAAGAAGGAAGGGCTAATTTCTATTGAAGAGGCAGAAGGAAACAATGTAAAAATTTTGAGCGCAGATAATTTAAATAGTCATAATATACATTACGGAAATAAATGTAAGAATGTTTCAAAAAATAACGAAAGTAAGAAGAAGTTATCTCTCAAAAGAAAAAAAGATTCCACAAAAAGGGAGAATCAAGATGATACAACTGTGGGTTGCATATCTCGAGAGGACAAGAAAATAAAAATTGAGGAATCATTACAGAACGATAGGTTAGAACATTTTGATATAAATGATAATAATTTTATAGAAAAACGAAAAAGGAAAAGAAAGAGAGGTAAAAAG…	MKQTSNMNFKPLKIKPSLLKELKKEGLISIEEAEGNNVKILSADNLNSHNIHYGNKCKNVSKNNESKKKLSLKRKKDSTKRENQDDTTVGCISREDKKIKIEESLQNDRLEHFDINDNNFIEKRKRKRKRGKKKKKIINSNMQINTTDNNLKKEKDDEEEEEREQEREQEREQENEEKRGEKKSTENVNISNINSSSNQNSNKKKELFDIERIIKNEEELEKDNNIKYKIHCNNWNNGGKIFILHSVMKSLFDNAFFKPTEIQSKTLEKSINDKNDIVVISKTGTGKTLTFCLPILNNILINKLKEYKKKLKNIQKFRCLILVPTRELALQILKHFNYINKYINLFISTIIGGLNLNKQKRILMKKPEILICTPGRLKYFLHLENPIKYIYQMKNIRYL…	796	0	null	no	GO_0005524, GO_0003676	GO_0004386	GO_0005524,GO_0003676,GO_0004386	0	0	0	0	0	0	0	0	0	0	0	0	0	0	0	0	0	0	0	0	0	0	0	0	0	0	0	0	0	0	0	0	0	0	0	0	0
4130	PF3D7_1324500	DEAD box helicase, putative	null	ATGGTTGAACGATTTAATGAGGAAATAAAAAGGTTTTTTCCTTTCGAGCCATACAAGATTCAGTTAAATTTTATGAGATTATTTTATCAAGTTTTGACAAGTTCAAATATTAAAAAATATGATAACTTAAATTTAATTTATGAAGTTATTAAACAAAATCAAAATATACAAGGTATGTTAAAGGATGATGCTTCTAATTTAATCTTTGATCATTTGAATGTTTTAAAAAATGAGGATATTAAAAATACGGAAGAAGAGCATATTATTTGTGAAATGAAGACTGGTTCAGGTAAATCCTTGACCCTCCTGACGTCTTTAATATATTGGTTGTGGAAACATAAGATGAACCTATTTTTCATAAAAGAAAACATAGAATTAAAAAGTACAGAACCCGATTGG…	MVERFNEEIKRFFPFEPYKIQLNFMRLFYQVLTSSNIKKYDNLNLIYEVIKQNQNIQGMLKDDASNLIFDHLNVLKNEDIKNTEEEHIICEMKTGSGKSLTLLTSLIYWLWKHKMNLFFIKENIELKSTEPDWVKESVIEKVIEKYKHNIQQDHKIKENNLNILKKYFSFTDDKIALHKNIKISKKKCEQHEPVQKNDNFVLPDNNDEVRSDYSIDDKDKKKQIFICSRTQSQLNQYFHELKKIEKKMGEDFSINMIIIGSRKHLCINEAFLKKYKNINELNDCCKNSKCKYKEIYNEKMSEKWKKKNGKKKRIFYDSSCSSNSSENEDIETIDNYILITKLINNRNVDIEDIKDICKNEHIEICPYYLSKENIKNADIILLPYICILNENIRNNLKIN…	1099	2	null	no	GO_0005524, GO_0004003, GO_0008026, GO_0003677, GO_0016818, GO_0003676	GO_0004386	GO_0005524,GO_0004003,GO_0008026,GO_0003677,GO_0016818,GO_0003676,GO_0004386	0	0	0	0	0	0	0	0	0	0	0	0	0	0	0	0	0	0	0	0	0	0	0	0	0	0	0	0	0	0	0	0	0	0	0	0	0
5032	PF3D7_1445900	ATP-dependent RNA helicase DDX5, putative	DDX5	ATGAGAGGATTTAATTACAACAACAATAGTAATAATAATAATAGATATAGTGCTTACCCCGATTATAATAATAGTTATGGAAACTACCAAGCATATGGTCAACAATATAGAGCGAATTATGGAACAGGGTATGTTCCAAATTACAATAATAATTCTAATAATTATGGTAAAAATTTAGCTCCAATTGATTGGAAAACTATAAATTTAGTTCCGTTTGAAAAGAATTTTTATAAAGAACATGAAGATATAAGTAAATTATCAACAAAAGAAGTTAAAGAAATTAGAGATAAACATAAAATTACAATATTAGAAGGTGAGAATGTACCCAAACCTGTCGTGTCAATTAATAAAATAGGATTTCCAGATTATGTTATAAAATCCTTAAAAAATAATAATATT…	MRGFNYNNNSNNNNRYSAYPDYNNSYGNYQAYGQQYRANYGTGYVPNYNNNSNNYGKNLAPIDWKTINLVPFEKNFYKEHEDISKLSTKEVKEIRDKHKITILEGENVPKPVVSINKIGFPDYVIKSLKNNNIVAPTPIQIQGWPIALSGKDMIGKAETGSGKTLAFILPAFVHILAQPNLKYGDGPIVLVLAPTRELAEQIRQECIKFSTESKIRNTCAYGGVPKSGQIYALKQGVHILIACPGRLIDLLEQNVTNLMRVTYLVLDEADKMLDMGFELQIRKIVDQIRPDRQTLMWSATWPKEVQALAKDLCKEQPIQVNVGSLTLTACRSIKQEIYLLEEHEKIGNLKSLLQRIFKDNDRIIVFVETKKNADFITKALRLDGMPALCIHGDKKQEER…	527	0	null	no	GO_0005524, GO_0003676	GO_0004386, GO_0003676	GO_0005524,GO_0003676,GO_0004386,GO_0003676	0	0	0	0	0	0	0	0	0	0	0	0	0	0	0	0	0	0	0	0	0	0	0	0	0	0	0	0	0	0	0	0	0	0	0	0	0
2579	PF3D7_1011900	heme oxygenase	HO	ATGATAAGGAAGATTATTATATTGATGTTTACATTTTTTTCGAACATACATAATGAAAAGATATATCATCATAAACAGAGAAGGAAGTTTTTGAAAGGCCCATTAGGATATTTAAATAGAAATGTCATCCAAAAAAAACATTATAATCTTTATGCTAAGAAATTTATAAACTATAAAGAAATTCAAATACAAAGAATAAACGATTATAGGAAAAGAAGTGGAGTAGACAAAAATAATATAAACTATAATTTGAGAGATACATATAATTACCACGAAACTCACCTTTTTGTAAGAAATGAAGTGCTACCGACGTTAGCCAAAATAGAAAATGAAAATTTAAAAGAGAAAGAAAAAAACAAGGAAATTTTTAGAAATATAAATGATTATAATTCTAATTTT…	MIRKIIILMFTFFSNIHNEKIYHHKQRRKFLKGPLGYLNRNVIQKKHYNLYAKKFINYKEIQIQRINDYRKRSGVDKNNINYNLRDTYNYHETHLFVRNEVLPTLAKIENENLKEKEKNKEIFRNINDYNSNFTRQTFLQFLMDLYNIFLKIDDLFLENKTYFSILIYNGPMQLTNHLYDDIIYVSSVVENSDDVSPSEYCMEYISHLENLCEENKLSFLAHAYVFYKNFHLSKEHLLKSICKYLNIIKKLKSSTYVADVENFEFCLNKMSRKWSRWEKDNFLASLHNATNKMMILTKHFEKVKS	305	0	null	no	GO_0005524, GO_0004392	GO_0004392	GO_0005524,GO_0004392,GO_0004392	0	0	0	0	0	0	0	0	0	0	0	0	0	0	0	0	0	0	0	0	0	0	0	0	0	0	0	0	0	0	0	0	0	0	0	0	0
1382	PF3D7_0624000	hexokinase	HK	ATGAGTGAGTACGATATTGCAAAAAATGATGTAACATATACCAAGTTAGATACAATAGAATGTGATATACCAATAAATGAAGAGTTATCATGGAGAATTAATAAATTTGTGAATCAGTTAAGAATATCTTATTCAACATTAGAAGAATTTGTAGACAATTTTGTATATGAATTAAAGAAAGGTTTAGAAGCTCATCGTAAACATCCAAATTTATGGATTCCTCATGAGTGTAGTTTTAAGATGTTGGATTCATGTATTGCTAATATTCCTACTGGTCAAGAGAAGGGTACATATTATGCTATAGATTTCGGTGGTACTAATTTTCGAGCTGTAAGAGCTTCATTAGATGGAAAAGGAAAAATAAAGAGAGATCAAGAAACATATAGTTTAAAATTTACA…	MSEYDIAKNDVTYTKLDTIECDIPINEELSWRINKFVNQLRISYSTLEEFVDNFVYELKKGLEAHRKHPNLWIPHECSFKMLDSCIANIPTGQEKGTYYAIDFGGTNFRAVRASLDGKGKIKRDQETYSLKFTGSYSHEKGLLDKHATASQLFDHFAERIKYIMGEFNDLDNKEVKSVGFTFSFPCTSPSINCSILIDWTKGFETGRATNDPVEGRDVCKLMNDAFVRAAIPAKVCCVLNDAVGTLMSCAYQKGRGTPPCYIGIILGTGSNGCYYEPEWKKYKYAGKIINIEFGNFDKDLPTSPIDLVMDWYSANRSRQLFEKMISGAYLGEIVRRFMVNVLQSACSKKMWISDSFNSESGSVVLNDTSKNFEDSRKVAKAAWDMDFTDEQIYVLRKIC…	493	0	null	no	GO_0005524, GO_0005536, GO_0016773	GO_0004396	GO_0005524,GO_0005536,GO_0016773,GO_0004396	0	0	0	0	0	0	0	0	0	0	0	0	0	0	0	0	0	0	0	0	0	0	0	0	0	0	0	0	0	0	0	0	0	0	0	0	0
3626	PF3D7_1227800	elongator complex protein 3, putative	ELP3	ATGATTAAATTTAAGATTGGTAGAAGTAATAAAAAATATGAGAAAAAAAGTAATATAGATAATAATGAGGAAAATATAAAAGAAAGTTGTGATGATAATATATTAAATGATCAAGTTGCAACAGATTTGAATTCAGAAGAATTAAATGAAAAGAATTATATAAACGAAATATTAGATGAATCTAGTGAAGATGATGGTAACGTCATAAATTCTTCATATGAAGAAAACAAGAAAACAAAAAACAAGGAAGAAAGCTATTATTATATTAATGATGCAATAAAAAGAAATTATCCATTAGAATATGAGGATAATAAAATATATCCAAAAGTATATTGTTATGAACCTACTAATTTTGAAAATTTTAAAAAAAAAATTAAAAATAAAAATGAGTTGAGGCAT…	MIKFKIGRSNKKYEKKSNIDNNEENIKESCDDNILNDQVATDLNSEELNEKNYINEILDESSEDDGNVINSSYEENKKTKNKEESYYYINDAIKRNYPLEYEDNKIYPKVYCYEPTNFENFKKKIKNKNELRHYECYSSTMNEFFYKYNENYYDDILKNESFKKFAEELWSNRSNIKTDQQYQDLCVQLRKKYKISPSKHQISVALQHHYLQSLDDDKKDMESIIELQKNSDHISDINDMDNIIAVDNTNRVDNMNKHDSSHVDETNAPSEEDEFMINKKGKDVKFVLENVNKMIITKEMKNYKDLDKESVHFLQINKRKGVRSNSGVLVVTIITHPHKFSCKYDCHYCPNEPNQPRSYLSTEPAILRANQNNFDVICQFFNRTTTLVNNGHVADKIEV…	1092	1	null	no	GO_0003824, GO_0051536	GO_0004402	GO_0003824,GO_0051536,GO_0004402	0	0	0	0	0	0	0	0	0	0	0	0	0	0	0	0	0	0	0	0	0	0	0	0	0	0	0	0	0	0	0	0	0	0	0	0	0
3046	PF3D7_1118600	histone acetyltransferase	MYST	ATGGTCCTGGGGGGAAAGAATGAAAACAAAGTGAACGTGATTAAAGGGGCTGGAAGTATAGGCAAGTATATTATGAAGGAAAATGGTAGTAAAATAAAAGAAGTGGGGGAATGGAATAACAGTAGTGAAAATGAAAATAGTGATAATAATAATAATGATAGAGAAGATAATATAAAGGAAAAGGTAGATAATAATAATAAGAATGATGATAATAATAATAATGATAGAGAAGATAATATAAAGGAAAAGGTAGATAATAATAATAATAATGATGATAATAATAATGATAATAATAATAATAATAAGAGTGATAATAATAATAATAAGAGTGATAATAATAATAATAAGAGTGATAATTATAATAATAAAATTGGCGATGTTAGCAATATTCCAAGCACG…	MVLGGKNENKVNVIKGAGSIGKYIMKENGSKIKEVGEWNNSSENENSDNNNNDREDNIKEKVDNNNKNDDNNNNDREDNIKEKVDNNNNNDDNNNDNNNNNKSDNNNNKSDNNNNKSDNYNNKIGDVSNIPSTNTSTVSNKIQGKGSVSYKSKEKTGDHSSNNKNTKGNNNKVRTSGKVINSLSKYSDSYALIFPNALPVKQVLWGLDPLNKVWRYCSIVYARPKNKVLNDTNFMFPLNMNKNEIINKVNNELNNNNSVSMSEGDYDYYVHWEKFDRRLDCWLAYENLRLLDKEPDDGLPLIKDNDNVSDHEHAGIDKEYLREHEENTKLKTINQIRFGKYLIDTWYFSPYPKEYQNIDILYICEFCLSFFKEYSELKRHIEKCEIRHPPGNEIYREEK…	608	0	null	no	GO_0016747	GO_0004402	GO_0016747,GO_0004402	0	0	0	0	0	0	0	0	0	0	0	0	0	0	0	0	0	0	0	0	0	0	0	0	0	0	0	0	0	0	0	0	0	0	0	0	0
736	PF3D7_0415300	cdc2-related protein kinase 3	CRK3	ATGAACGTTAAAGATGTGGATACCCTTTTAGATATTTTTAGAGGGGGGCCAGGTGTTCATACTTGCTCAGGTATTGAAAATTATTTTTTAGAAAACAATACGTTAGATGTTGATATTAAAAAAGAATTCATAAAAAGGTTGGAGAACCCCACATTTTTATCAAAGTTTTGTATGTTAAAGAGAAAGTTCGTTTATAACTTTTTTCTAGTCAAAAAGGAAATAGTAAAAAAAAGGTTATGGACTTATATAGAAAATATTATTGATAAATTAAATGATGATGATATTATAAAAGTACATAAATATTTAGAAAAGGAATCTGGGAATGTTATTCATACCTTTTTAAATAATTTATATTTGTATAAAGATATGGAAAATAAAAGAAGAAGGAGGAAAAATATA…	MNVKDVDTLLDIFRGGPGVHTCSGIENYFLENNTLDVDIKKEFIKRLENPTFLSKFCMLKRKFVYNFFLVKKEIVKKRLWTYIENIIDKLNDDDIIKVHKYLEKESGNVIHTFLNNLYLYKDMENKRRRRKNIKRKKKEKKKRNNHDIYNNCNINSNKLDCNLPYNLNLENIFWKQINLKNYKKKYFYHINKNINSLWKVYLSYNLLNINKCERKDLIKNILHTLLKKEYEQLSCFEWDSKVVLYKLLKNQDLKKCSLENYTEDDVTSNPSNDFDNTVDIDLNMKENVQNKDKVHVGDKIGSIPEGDNICLQTDDQTYNHNNNNIMLKKKKKSSENHILINSNNVLLNYNKNSELLDDCFKLCNNNNNNVHIYDKSNVSYTNLNDLKNGYYKDTDIIYD…	1339	0	null	no	GO_0005524, GO_0004672, GO_0016772	GO_0004407, GO_0004672	GO_0005524,GO_0004672,GO_0016772,GO_0004407,GO_0004672	0	0	0	0	0	0	0	0	0	0	0	0	0	0	0	0	0	0	0	0	0	0	0	0	0	0	0	0	0	0	0	0	0	0	0	0	0
654	PF3D7_0406400	cytosolic glyoxalase II	cGloII	ATGAAGCCATGCGCACAAGTACTTGTAGTGCCCGTGTTAAATGATAATTTCTCTTATGTTATAATTGATGAGAAAACTAAAAAGGCAGCTTCTATAGACCCAGTAGAACCAGATAAAGTATTAAAAAGAATAGAAACAGCCAATGTTGAATTGGAATATGTTTTATGCACACATCATCATTATGATCATTCAGGTGGAAATATTCGAATGAGAGAATTAAAACAAAATATCAAAGTGGTCGGATCAGCATATGAACCAACCCCAGGTGTAAACGAGAAAGTATACGACGGTCAAATTATACGTTTAGGTGAGTTGAACATAAAAGCTATTCATGCACCTTGTCATACGAAGGGACACATTTTATATTATGTATACAAAACTGATGAAGCAAAACAAGAA…	MKPCAQVLVVPVLNDNFSYVIIDEKTKKAASIDPVEPDKVLKRIETANVELEYVLCTHHHYDHSGGNIRMRELKQNIKVVGSAYEPTPGVNEKVYDGQIIRLGELNIKAIHAPCHTKGHILYYVYKTDEAKQEDHKYKPILFTGDTLFIAGCGRFFEGSAKDMFKNIEKVKNMRKETLIYCGHEYTLNNLRFALSIENDNEYMKNKLNEVTEKLKNKEHSVPSTIEEENLINPFFRTHCYVNKFNMNDEIKILDKLRQLKNNF	263	0	null	no	GO_0004416, GO_0008270	GO_0004416	GO_0004416,GO_0008270,GO_0004416	0	0	0	0	0	0	0	0	0	0	0	0	0	0	0	0	0	0	0	0	0	0	0	0	0	0	0	0	0	0	0	0	0	0	0	0	0
3742	PF3D7_1239600	hydroxyethylthiazole kinase	ThzK	ATGAGAAAATATAATTTTTTTACAAAAAGTCGCTTATTCTCTACCTTAACCAAAATAAATAGCGTTAAGGAATATCATGATGATATAATAAAGTGCATTGAGAAAGTTCGGGTTATTAATCCTCTTGTTCATTGTATAACTAATAGAGTAACCACTGAAAAGGTGGCAAACAGTTTATTGGCCTTTGGCTCTTCTCCGGCTATGATTGATAATCCTAAGGAAGTTGAAGAATTTGCTAAAATAGCTTCATGTACTTATTTCAACTTAGGGTTACATACGACGCAGGTAGAAAATATTAATTTATTAGAAAAGTTAAGAAAAGAATGTATGAAAGATAAATTTATGTTAATTATAGATCCAATAGCTGTTGGAGCAACAACCTATAGAACTAATGTTATT…	MRKYNFFTKSRLFSTLTKINSVKEYHDDIIKCIEKVRVINPLVHCITNRVTTEKVANSLLAFGSSPAMIDNPKEVEEFAKIASCTYFNLGLHTTQVENINLLEKLRKECMKDKFMLIIDPIAVGATTYRTNVIKDIILKCQPNVIKGNIAEIYYLDKGEFLGKGVDSNNNNTHNETDVINSARNVALKYNCAVVVTSKTDYIVSPCSHYVAKINCDLKILTKITGSGCSVGALCAAATSVYPQNPFIACISATLIYKLAAFKAYQKEKYPGSLSHKIIDDIYYYSHNPHFLNFQIVDIYKAA	302	0	null	no	GO_0004417	GO_0004417	GO_0004417,GO_0004417	0	0	0	0	0	0	0	0	0	0	0	0	0	0	0	0	0	0	0	0	0	0	0	0	0	0	0	0	0	0	0	0	0	0	0	0	0
[truncated: 4,970 more rows]
[truncated: 2,548 more columns]
