# Supplementary material for: Proteome-wide analysis of a malaria vaccine study reveals personalized humoral immune profiles in Tanzanian adults
Source: eLife. 2020 Jul 14;9:e53080. doi: 10.7554/eLife.53080 (PMC7386907; doi:10.7554/eLife.53080)
Supplement: Source data 3. [file elife-53080-data3.csv]

Index	GeneID	Product.Description	Gene.Name	CDS	AA.Seq	AA.Len	N.TM	SignalP	SignalP_yn	Predicted.GO.Process.IDs	Curated.GO.Process.IDs	All.GO.Process.IDs	GO_0000015	GO_0000139	GO_0000151	GO_0000172	GO_0000178	GO_0000214	GO_0000221	GO_0000275	GO_0000276	GO_0000439	GO_0000502	GO_0000775	GO_0000786	GO_0000796	GO_0000930	GO_0000940	GO_0005576	GO_0005578	GO_0005581	GO_0005622	GO_0005634	GO_0005663	GO_0005665	GO_0005666	GO_0005669	GO_0005672	GO_0005673	GO_0005674	GO_0005681	GO_0005685	GO_0005694	GO_0005730	GO_0005737	GO_0005739	GO_0005740	GO_0005741	GO_0005743
4546	PF3D7_1367600	ribosome biogenesis protein MRT4, putative	null	ATGCCGAAATCAAAAAGAAATGTTAAGATATCCTTGACCAAAGTCAAGAAGAAAGTCAACAAAAAAGAAATGAAAGACCTGAAATTATTAGAAATAAAAAAAATGATTCAAATACCAAATGTTTATGTTTATGTATTAGATATTAGAACTTATTCAAACAATAATCTCAAAGTAGCCATAGAACATTTTAAACCAAACGGAAAATTTTTTATTGGAAAGAATAAATTAATGAAATTAGCACTTGGTATCAATGAAAATAATGAAGTCAAACCAAACATGAGCAAAATATCAGAGCTACTTATTGGGAACCGTATTCTTTTAATCACCAAGGATGGCCCATTAAGCGTTCTGAAATTTTTTAATGAATTTCAACCAGAAGAATATATAAAACACGGAAAT…	MPKSKRNVKISLTKVKKKVNKKEMKDLKLLEIKKMIQIPNVYVYVLDIRTYSNNNLKVAIEHFKPNGKFFIGKNKLMKLALGINENNEVKPNMSKISELLIGNRILLITKDGPLSVLKFFNEFQPEEYIKHGNISPQDITLKCGEVLNVPVSMQKDLQKRKLNFDIVDQKIILKENKVLAEKDKLISLENSKILRMLNMKIAFFDITVLGYWYLDKFVSLMN	222	0	null	no	GO_0042254	GO_0000027, GO_0042273	GO_0042254,GO_0000027,GO_0042273	0	0	0	0	0	0	0	0	0	0	0	0	0	0	0	0	0	0	0	0	0	0	0	0	0	0	0	0	0	0	0	0	0	0	0	0	0
3166	PF3D7_1130700	structural maintenance of chromosomes protein 1, putative	SMC1	ATGGAGAGAAGGGGAAAAAATCAAACCAACGATGCTACTCTTAACGAATTTGATGATGATACCTCTGAATTTAGTATGAACATATTGAATCATCCTAACACGGATGTATTAGTAAGTCCCATTAAAGTTGTGGACCATGATTTTAATAATTTTATTAATAATAAATGTTTAGATTATTCAATTGATTCTTCTTTAGATATTACTACTAGTAATTTAACAACTCTCAAAAGTAAAGGGCAACAAAAAATAAATAAGTCGAATCACGCAGTTCAAAATGGAAATAATAATATGGATGAGAAAATAAAGAAAAACACCATATTAGTAAATAAAGAGGAAAAGAATAAAAAAGGAGATGCAAATGTAAATGTTGCTCATGAAAATGTCGCCCTTCAAAATGTC…	MERRGKNQTNDATLNEFDDDTSEFSMNILNHPNTDVLVSPIKVVDHDFNNFINNKCLDYSIDSSLDITTSNLTTLKSKGQQKINKSNHAVQNGNNNMDEKIKKNTILVNKEEKNKKGDANVNVAHENVALQNVALQNAALQNVEEENNLTRNKGNFKYAENFSGSNNNHYGSRVIQKSKHTQDYRKDGSYEQEEIEDNEYINISQSKAQHEDMNNVQSIIPHDDSIITPSNHNNLKCDVLIKDKDQSYNRNMKKYSEFNLKQQDLSISQDYLNNSILSSVGLYKENDLCFIKYIIVSNFKSYEDENIIGPFSKFTSIIGPNGSGKSNIMDCICFALGINNKYLRVKNLRNLIYHKENEKAEDINKRICYVKIILECNKENVEIKRTLNYKGVSNFYIND…	1818	0	null	no	GO_0051276	GO_0000070	GO_0051276,GO_0000070	0	0	0	0	0	0	0	0	0	0	0	0	0	0	0	0	0	0	0	0	0	0	0	0	0	0	0	0	0	0	0	0	0	0	0	0	0
3839	PF3D7_1249900	apicoplast dimethyladenosine synthase, putative	null	ATGATTTATTATTCATTTAAGTTACGCTGGGCTTTATTTTTTTTCCTTCTAGTAACACTTTTTAAAATAAATAATGTTTTTTCAAAAAGGAAACGAAAAACGTATGTAAAAAATGTAAAGTGGTATCCCCAAAGAATTAATCATTACTATATAAACGGTGTAGTGTTCCCAAGAAAGAGAAGAAGGCTCGCCACATTCTTTGTGTTTCTTGGAAATAATGGAAAAAAGAAAAACAAAAGAAATTATAAATTTAATATTAAGAGTAAGTTAAACGTTGAAGGGGAGAACAAAAATGAAGATGACCAAAAAAATGAAGGTGACCAAAAAAATGAAGATGACCAAAAAAATGAAGATGACCAAAAAAATGAAGATGACCAAAAAAATGAAGGTGACCAAAAA…	MIYYSFKLRWALFFFLLVTLFKINNVFSKRKRKTYVKNVKWYPQRINHYYINGVVFPRKRRRLATFFVFLGNNGKKKNKRNYKFNIKSKLNVEGENKNEDDQKNEGDQKNEDDQKNEDDQKNEDDQKNEGDQKNEDDQKNEGDQKKNEYNNKMYNTEPIDDKNQFISRTFEGINIFPIKQNEKDQDYLKTKLPSKEFKPKRSLGQNYLKDTNIIKKMISAIEYNVEHHLFQNKKRMSVRKEEDKKKKNKKKKINNNKKKKKKKNNNNNNNNNNNNQNNNQNNNNNNNNQNNNNYNNNNYNSPNQEQCDDIKTKQYVKDNVENNKKIDEQQNCCKESYNEDKEKNNHNCIDGIYTEDIITKKKKCNNDNITEEGENMNVQNLESLQNDGNGVIELGCGLG…	639	2	HMM: MIYYSFKLRWALFFFLLVTLFKINNVFSK, NN: MIYYSFKLRWALFFFLLVTLFKINNVFSK	yes	GO_0000154	GO_0000154	GO_0000154,GO_0000154	0	0	0	0	0	0	0	0	0	0	0	0	0	0	0	0	0	0	0	0	0	0	0	0	0	0	0	0	0	0	0	0	0	0	0	0	0
4747	PF3D7_1415800	dimethyladenosine transferase, putative	null	ATGTCATCCTACTTTTTAAACAACTGCTTGAAACTATTTAAAAATAATATAGTAACAATGAAAGTGAATAAAGGATTTTATAATAATATAATAAATAATAACAAGTCGACAAAAATTATAAAAAATGTAAGCGATGGAATAAGTAAAAAGAGTCATGGAAAGAGAAATATAAGTACTTCAAAAGTACAAAAAGGAAATAAAATGAATATGATATTATATAAAAAACATGGTCAGCATCTTTTAAAAAACCCAGGTATTTTAGATAAAATTATATATGCAGCAAAAATAAAAAGCTCAGATATAGTATTAGAAATTGGATGTGGTACAGGAAATTTAACGGTTAAATTGTTACCACTAGCTAAAAAAGTTATAACAATAGATATTGATTCAAGAATGATT…	MSSYFLNNCLKLFKNNIVTMKVNKGFYNNIINNNKSTKIIKNVSDGISKKSHGKRNISTSKVQKGNKMNMILYKKHGQHLLKNPGILDKIIYAAKIKSSDIVLEIGCGTGNLTVKLLPLAKKVITIDIDSRMISEVKKRCLYEGYNNLEVYEGDAIKTVFPKFDVCTANIPYKISSPLIFKLISHRPLFKCAVLMFQKEFAERMLANVGDSNYSRLTINVKLFCKVTKVCNVNRSSFNPPPKVDSVIVKLIPKESSFLTNFDEWDNLLRICFSRKRKTLHAIFKRNAVLNMLEHNYKNWCTLNKQVPVNFPFKKYCLDVLEHLDMCEKRSINLDENDFLKLLLEFNKKGIHFFNISNVKNNDMTNIFLDDDMNDSDQNVDD	381	0	null	no	GO_0000154, GO_0006364	GO_0000154	GO_0000154,GO_0006364,GO_0000154	0	0	0	0	0	0	0	0	0	0	0	0	0	0	0	0	0	0	0	0	0	0	0	0	0	0	0	0	0	0	0	0	0	0	0	0	0
327	PF3D7_0219500	pseudouridine synthase, putative	null	ATGATTTGTTCAAATTTATCTCTGTTGAGATATGTTCATTTAGTTTATTACTTTATAATAATATCATTTTGCATTCATAATAATATTTCTTGTTTTAATGTGAATCTTACTAAAACAAATGAAGATGCTAATATTATAAGACTTAACAAATTAATTTCCATGAAAAGAAATATTTCAAGAAGAAAATCAGATGAATTTATTAAAGATGGAAAAGTTAAAATAAACAATAAAATAATAACAAATCCAGGTACACATGTACATATAGGAAAAGATAGTTTACGTATATACGACAAAAAAATTAAATTAACAAATATTATAAATATGATAAAACAAAATGAAAACAAATTACATAAATGGATAGTTTTACATAAACCAAAAGGATTATTATGTACATCCAAT…	MICSNLSLLRYVHLVYYFIIISFCIHNNISCFNVNLTKTNEDANIIRLNKLISMKRNISRRKSDEFIKDGKVKINNKIITNPGTHVHIGKDSLRIYDKKIKLTNIINMIKQNENKLHKWIVLHKPKGLLCTSNDEKNRKSIYTLFPEEMLQKYRLVTVGRLDRNTSGVLLLTNDYAWVNKLTHPKYQRIRTYRVHIEGPVKMNALKELARGIYLEEDEKTQPKKIYNYKESREKSNIDDKKKKKMSKMKKKTNPAFIEILREEKIKIKEDTKKITVLNISIKEGRNRQIRKMFQQINQPVIKIKRTSFENITLKNIYFPKQYRELNQKEVNDLKLRNF	338	1	null	no	GO_0009451, GO_0001522	GO_0000154	GO_0009451,GO_0001522,GO_0000154	0	0	0	0	0	0	0	0	0	0	0	0	0	0	0	0	0	0	0	0	0	0	0	0	0	0	0	0	0	0	0	0	0	0	0	0	0
2997	PF3D7_1113900	mitogen-activated protein kinase 2	MAPK2	ATGTTAAAAAAAAAAAAGGATTACGAAAATGCTGATTTAGAGGATTGCAATACCAAAGAGATAAAGGGATATTCAAAAGTAGGGAGCGAAAAAAATATAAAAAAAAAAATGACTTCTATAAAAGAGTCTAGTAGTAGGGATGAAGAAGAAGAAGATGCTAATGTAAATAAAAATATTAAAAAATTTAAAGAAGGCAATAAAAAAGACAATATTTCAAAAAATTGTAATATTGTAGAAAAGAAAAATAATAAAAGCAAAGAAGAGAAAATAAATATCAAAGAAGCTATTATTAAAAATGTAAAGGTACCAGATAATTACGAAATAAAACATTTGATTGGTAGAGGATCCTATGGATATGTATATTTAGCTTATGATAAAAATGCAAATAAAAATGTGGCT…	MLKKKKDYENADLEDCNTKEIKGYSKVGSEKNIKKKMTSIKESSSRDEEEEDANVNKNIKKFKEGNKKDNISKNCNIVEKKNNKSKEEKINIKEAIIKNVKVPDNYEIKHLIGRGSYGYVYLAYDKNANKNVAIKKVNRMFEDLIDCKRILREITILNRLKSDYIIRLHDLIIPEDLLKFDELYIVLEIADSDLKKLFKTPIFLTEQHVKTILYNLLLGEKFIHESGIIHRDLKPANCLLNQDCSVKICDFGLARTINSDKDIHIVNDLEEKEENEEPGPHNKNLKKQLTSHVVTRWYRAPELILLQENYTNSIDIWSTGCIFAELLNMMKSHINNPTNRFPLFPGSSCFPLSPDHNSKKVHEKSNRDQLNIIFNVIGTPPEEDLKCITKQEVIKYIKL…	508	0	null	no	GO_0006468	GO_0000165, GO_0006468, GO_0007165	GO_0006468,GO_0000165,GO_0006468,GO_0007165	0	0	0	0	0	0	0	0	0	0	0	0	0	0	0	0	0	0	0	0	0	0	0	0	0	0	0	0	0	0	0	0	0	0	0	0	0
2515	PF3D7_1005500	regulator of nonsense transcripts 1, putative	UPF1	ATGGATAAAACTTTCGATTATAATAATATTCATGTAGATAATTTTGACGAACTGTACGATTTTTGTATTTCTAAGGATACGAATAAAAAAAAAATAAAAGAAGAAAACTATTTTTCAGAAGATACACAACAAAAATTTAATGACGATAAGGATACATGTAATAAAGAGGTGTTAAAAAAAAATACAAATATAAAACCTACAAAAAAACATGGGAAAAATAAAAAATCGGAATATTCTCCATGTAAAATAATAGAGGAAAAGAGGTTAGATATGTTAAATGAAAGTTTGGAAGATACGGAATCATATTATGATCGAAAAAAAAAAAATTCACATAAATACAAAGAAATAAATAACAGCAATAATAATAATAATAATAATAATAATAATAATGATGATAAC…	MDKTFDYNNIHVDNFDELYDFCISKDTNKKKIKEENYFSEDTQQKFNDDKDTCNKEVLKKNTNIKPTKKHGKNKKSEYSPCKIIEEKRLDMLNESLEDTESYYDRKKKNSHKYKEINNSNNNNNNNNNNNDDNNSKKHIDPHGNDCIHQGKHKNEHEQQYYSNKHMKNNSECLSDISSYTDIRSCNNVEDGIYDEYDLTNKMKYEKTNKYKNKNKNKNGYNNKYENKNNYYKNDYSKYYSNHKDDTHNELYEEGNNYRYKNKKSKDDLKYYRCRYCEIDSIDSVVQCNNCKRWFCNGSYGTCGSHIVTHLVRSKHKEIRLHKNSLLGETILECYNCACRNVFLLGFLPTSEEGVVVIICRDPCLSSYISLYEKHVGPFDEHKSKSLQDDMEKEILLEDH…	1579	0	null	no	GO_0000184	GO_0000184	GO_0000184,GO_0000184	0	0	0	0	0	0	0	0	0	0	0	0	0	0	0	0	0	0	0	0	0	0	0	0	0	0	0	0	0	0	0	0	0	0	0	0	0
1795	PF3D7_0803700	tubulin gamma chain	g-tub	ATGCCGAGAGAAATTATCACACTTCAATGTGGTCAATGCGGAAATCAAATAGGTGTGGAATTTTGGAAACAGCTATGCAATGAACATAATATTGATCAAGAGGGTATACTAAAAAATAATAATTTTTTAAATGAAGATAGGAAAGATATATTTTTTTACCAAGCCGATGATGAACATTTTATTCCGAGGGCTTTGTTATTTGATTTAGAACCTCGTGTAATTAATAGTATCCAGACTAGCGAATATCGAAATTTGTATAATCCTGAGAATATGTTTATTTCTAAAGAAGGTGGAGGTGCAGGTAATAATTGGGGTTGTGGATATAGTCAAGGACATAAAGTAGAAGAAGAAATTATTGATATGATTGATAGAGAAGTGGATAATAGTGATAATTTAGAA…	MPREIITLQCGQCGNQIGVEFWKQLCNEHNIDQEGILKNNNFLNEDRKDIFFYQADDEHFIPRALLFDLEPRVINSIQTSEYRNLYNPENMFISKEGGGAGNNWGCGYSQGHKVEEEIIDMIDREVDNSDNLEGFILSHSIAGGTGSGMGSYLLELLNDNYSKKMIQTFSVFPLLTNESSDVVVQPYNSILTLKRLILSTDSVVVIDNTSLNRIFVERLKLNNPTFQQTNTIISNVMSASTTTLRYPGSMNNDMISLISSLIINPKCHFLITSYTPITIDKHISNVQKTTVLDVMKRLLHTKNIMVSAPVRRGMYISILNIIRGETDPTQVHKGLQRIRDRKLVNFIKWNPASIQVTLAKQSPHVVSQHKVCGLMMANHTSISTLFERCVTQFDRLYKR…	452	0	null	no	GO_0006184, GO_0031122, GO_0007020, GO_0051258	GO_0000226	GO_0006184,GO_0031122,GO_0007020,GO_0051258,GO_0000226	0	0	0	0	0	0	0	0	0	0	0	0	0	0	0	0	0	0	0	0	0	0	0	0	0	0	0	0	0	0	0	0	0	0	0	0	0
2546	PF3D7_1008700	tubulin beta chain	null	ATGAGAGAAATTGTTCATATTCAAGCTGGCCAATGTGGAAATCAAATAGGTGCAAAGTTTTGGGAAGTCATTTCTGATGAGCATGGAATAGATCCAAGTGGTACCTATTGTGGGGACAGTGACTTACAGTTAGAAAGAGTTGACGTTTTTTACAACGAAGCAACAGGAGGTAGATATGTTCCAAGAGCTATATTGATGGACTTGGAACCTGGTACTATGGATAGTGTTCGTGCTGGCCCCTTTGGTCAATTATTTCGTCCAGATAATTTTGTGTTTGGTCAAACAGGTGCAGGAAATAATTGGGCTAAAGGACATTATACTGAAGGTGCTGAATTGATAGATGCAGTTTTAGATGTCGTTAGAAAAGAAGCAGAAGGTTGTGATTGTTTACAAGGATTT…	MREIVHIQAGQCGNQIGAKFWEVISDEHGIDPSGTYCGDSDLQLERVDVFYNEATGGRYVPRAILMDLEPGTMDSVRAGPFGQLFRPDNFVFGQTGAGNNWAKGHYTEGAELIDAVLDVVRKEAEGCDCLQGFQITHSLGGGTGSGMGTLLISKIREEYPDRIMETFSVFPSPKVSDTVVEPYNATLSVHQLVENADEVQVIDNEALYDICFRTLKLTTPTYGDLNHLVSAAMSGVTCSLRFPGQLNSDLRKLAVNLIPFPRLHFFMIGFAPLTSRGSQQYRALTVPELTQQMFDAKNMMCASDPRHGRYLTACAMFRGRMSTKEVDEQMLNVQNKNSSYFVEWIPHNTKSSVCDIPPKGLKMAVTFVGNSTAIQEMFKRVSDQFTAMFRRKAFLHWYT…	445	0	null	no	GO_0006184, GO_0051258	GO_0000226, GO_0042493	GO_0006184,GO_0051258,GO_0000226,GO_0042493	0	0	0	0	0	0	0	0	0	0	0	0	0	0	0	0	0	0	0	0	0	0	0	0	0	0	0	0	0	0	0	0	0	0	0	0	0
1663	PF3D7_0722100	protein pelota homolog, putative	null	ATGAAGTTGTTATACAGAAAGCGTGATAACGATAAGATGATTATCGGTTTAATTACGGAAGAGGATGATGATTTGTGGGGAGTGTATAATTTGTTAAGTTTAAATGATGAAATAGAATCTTATACTTCAAGAAAGGTTCAAAAAGATATTGGTAATAATTCATATGTAACTGAAATAAGAAAGTTGATGTTAACATTGTGTATTACTAAAATTGATTTTGATTGTGAGAATAATAGTTTAAGAGTATCAGGGAAAAATGTCAAAGCAAATGAGTATGTTAAGATTGGTCAGTATCATACTTTTGATATAGGTCTTAATGATAAGATAAAAATTATGAAAAAGAACTGGGATCATATACATAGAGAAAAATTAGAAGAATGTACTAATATAAAGAATAAT…	MKLLYRKRDNDKMIIGLITEEDDDLWGVYNLLSLNDEIESYTSRKVQKDIGNNSYVTEIRKLMLTLCITKIDFDCENNSLRVSGKNVKANEYVKIGQYHTFDIGLNDKIKIMKKNWDHIHREKLEECTNIKNNCEIAILLIDCGRANMYLLTQQLYKTVFSINKIIHKKKDKNNSSSYKKSLENFFNIVLKNLYSSINFEKIKCIVLGGPGFFKNDFFSYLYEKSDMKNDKNILTLKNKFLIVKTSNIFKNSLNEILNDENMKKQILNLKVVSHVDILNKFYKIFEKNEDKICYGPDEVKYASKINAIDSLLITDKTFRSCDVKTRKEYVQVVQYVKNTGGQVYIFSDNHTSGEQLNSLTGIAAILKFPIFYDINQAHEKGQSTKEDYIKREDTQNGEH…	403	0	null	no	GO_0071025, GO_0070966, GO_0070481	GO_0000280	GO_0071025,GO_0070966,GO_0070481,GO_0000280	0	0	0	0	0	0	0	0	0	0	0	0	0	0	0	0	0	0	0	0	0	0	0	0	0	0	0	0	0	0	0	0	0	0	0	0	0
2787	PF3D7_1032100	mRNA-decapping enzyme subunit 1, putative	DCP1	ATGAAAAAGAGGAATACGTTAAGTACAAGCTATGGGCGCTTGAAGGGTCGTGTGAGTCGTTATGATATGAACAGCTCATATAATTTAAATGAGCATAAAAATAATAAAAATAGTGCACTAGAAGAAATAAAAGATTATAAAACTGGTGAGACATCACATGATAATATAAATGGTAACAACATAAATAATAATAAGAACATAAATAATAATAACAAAATAAATAATAACAAAATAAATAGTAGTAATAATTGTGCACTTGTAAATTCTTCCAACACGATTAATAACAACCTGAACAACATTAATAATATTAATAATATTAGTAATACAAACCATAGTGTTAATAATAGTACTTACCAAAGTTGTAATAATAAATATAATAAAAATGGATTTGTTTATGAT…	MKKRNTLSTSYGRLKGRVSRYDMNSSYNLNEHKNNKNSALEEIKDYKTGETSHDNINGNNINNNKNINNNNKINNNKINSSNNCALVNSSNTINNNLNNINNINNISNTNHSVNNSTYQSCNNKYNKNGFVYDYNTYYTKKSSDLKGKLKNENESMNSDGNNDVTRINSNHSNNIVLNDLNNSMNSLNIPKDNNISHVNNMTPINNMMKGINNRNDSVNTHMYNMKNLKDIRLYNHKEKKNVNEENVNVDQDNEEKNLVETQNENDKRNEKKEEDDDEDVDEAEEKEEEGMKLLREKICFKMLKSIDIYITEIIMKSCFVTVYKMKDDELKWKRADIEGFLYIVKRSIKPYYRLIITNKKNEKHLLQDIDTNMNLSTDQNYIFYRIINEETNVRNIYSL…	1190	0	null	no	GO_0043085	GO_0000290	GO_0043085,GO_0000290	0	0	0	0	0	0	0	0	0	0	0	0	0	0	0	0	0	0	0	0	0	0	0	0	0	0	0	0	0	0	0	0	0	0	0	0	0
3020	PF3D7_1116200	pyridoxine biosynthesis protein PDX2	PDX2	ATGTCAGAAATAACTATAGGGGTATTATCACTACAAGGTGATTTTGAACCGCATATAAATCATTTTATCAAATTACAAATACCGTCGTTAAATATTATCCAAGTAAGAAATGTTCATGATTTGGGACTATGTGACGGGCTTGTAATTCCAGGTGGAGAATCCACAACTGTACGTCGATGTTGTGCTTATGAAAATGATACCTTATATAATGCTTTAGTACATTTCATTCATGTGCTAAAAAAGCCAATTTGGGGCACTTGTGCAGGTTGTATTCTCTTATCTAAGAATGTAGAAAATATAAAACTTTATAGCAATTTTGGAAATAAATTTTCTTTTGGAGGATTGGATATAACTATATGTAGAAATTTTTATGGATCACAAAATGATAGTTTTATATGC…	MSEITIGVLSLQGDFEPHINHFIKLQIPSLNIIQVRNVHDLGLCDGLVIPGGESTTVRRCCAYENDTLYNALVHFIHVLKKPIWGTCAGCILLSKNVENIKLYSNFGNKFSFGGLDITICRNFYGSQNDSFICSLNIISDSSAFKKDLTAACIRAPYIREILSDEVKVLATFSHESYGPNIIAAVEQNNCLGTVFHPELLPHTAFQQYFYEKVKNYKYS	219	0	null	no	GO_0006543, GO_0042823	GO_0000304, GO_0042819	GO_0006543,GO_0042823,GO_0000304,GO_0042819	0	0	0	0	0	0	0	0	0	0	0	0	0	0	0	0	0	0	0	0	0	0	0	0	0	0	0	0	0	0	0	0	0	0	0	0	0
3030	PF3D7_1117100	deubiquinating/deneddylating enzyme	UCH54	ATGGCGAGGGATAATGAAAACATTTTAGAAGAGTGGTGTTTAATAGAAAGTAACCCGTGTATATTTTATGATATGCTTAAACGTATGGGTGCTACAGAAATTTCAGTAGAAGATGTGTATAGTTTATCTTATTTTGATGATTATATAAATAATAAGGAGATTATAAATATGAATCATATATTGGGTGTTGATACATATTTAGGAGAAAATAATAAAACGCTGGATAAAGAGAATAATGTTGTTGATGTTATCGAATTATATAAGAATAATATATGTATGGAAGATAAATATAATAAATTATTAAAACATCATAGTTATATTTATGGTATAATATTTTTATTTAATATTGGAAAGCATTATAAAAATAATAAATATATTGAGCATAATGTTCCTGATAAT…	MARDNENILEEWCLIESNPCIFYDMLKRMGATEISVEDVYSLSYFDDYINNKEIINMNHILGVDTYLGENNKTLDKENNVVDVIELYKNNICMEDKYNKLLKHHSYIYGIIFLFNIGKHYKNNKYIEHNVPDNLFFAKQVIPNACATQAILSIVLNKDIELNDEIKNIKTFSLNFDSSMKGLTLSNCTFLRNIHNSYKPPIYLDKEDVHHDKKKSEDSFHFVSYISFQDKVYLLDGLQSGPVLINADEQNKPNPNNNNNNKDNDNDNNNNNNNNNNNNNNNNNNNNNNNNNNIGMNGKDWIEISREHIKKEIDEICNSQTNNDVRFNIIAVMKDKEYIIQEYINIHRIVKQRVNIKLINLGENIELSDEINEDEFPLLNDIPSIENLPNNVDTLYNIVN…	465	0	null	no	GO_0006511	GO_0000338, GO_0016579, GO_0006511	GO_0006511,GO_0000338,GO_0016579,GO_0006511	0	0	0	0	0	0	0	0	0	0	0	0	0	0	0	0	0	0	0	0	0	0	0	0	0	0	0	0	0	0	0	0	0	0	0	0	0
5177	PF3D7_1460400	ubiquitin carboxyl-terminal hydrolase isozyme L3	UCHL3	ATGGCAAAGAATGATATTTGGACACCTTTAGAGTCCAATCCCGATTCTTTATATTTATATTCTTGTAAACTTGGACAGTCAAAATTAAAATTTGTGGACATCTATGGTTTTAATAATGATTTATTGGATATGATTCCACAACCTGTTCAAGCGGTTATATTTTTATATCCTGTAAATGATAATATAGTTTCTGAAAACAATACCAATGATAAGCACAATTTGAAAGAAAATTTTGATAACGTCTGGTTTATAAAACAATACATTCCAAACTCATGTGGAACCATAGCCTTGTTACATTTATACGGAAATTTAAGGAATAAATTCGAACTAGATAAGGATTCTGTTTTGGATGATTTCTTTAATAAAGTTAATGAGATGTCTGCCGAAAAAAGAGGACAG…	MAKNDIWTPLESNPDSLYLYSCKLGQSKLKFVDIYGFNNDLLDMIPQPVQAVIFLYPVNDNIVSENNTNDKHNLKENFDNVWFIKQYIPNSCGTIALLHLYGNLRNKFELDKDSVLDDFFNKVNEMSAEKRGQELKNNKSIENLHHEFCGQVENRDDILDVDTHFIVFVQIEGKIIELDGRKDHPTVHCFTNGDNFLYDTGKIIQDKFIEKCKDDLRFSALAVIPNDNFDII	232	0	null	no	GO_0006511	GO_0000338, GO_0016579, GO_0006511	GO_0006511,GO_0000338,GO_0016579,GO_0006511	0	0	0	0	0	0	0	0	0	0	0	0	0	0	0	0	0	0	0	0	0	0	0	0	0	0	0	0	0	0	0	0	0	0	0	0	0
3705	PF3D7_1235900	pre-mRNA-splicing factor SYF1, putative	XAB2	ATGGCTTTATTTGGAGAACTGTATGAGTGCGAAGAATTTTTTAACGAAGAGACATTTAACATAAAAGAAGGTGAATTTTATAATTATGATGATTATAGGGATTTAGAAGAATCGTTTGATTACTCAGCACACCCCGAGTATGTTGAATCTAACGATGTAACTTTAATAAATAAGAATAATGATGATTATGATGATGATAATAAGAGTTATATTAAAAATATTGAAATAGACATAAAAGAAAATTTTGATAAGATATCAACAAGATATTTATTTTTATATATTAATAAGTATAAAGAAATGTATATAAAAAATATGAAAGGATTATACGAGGTCCATTTTTATGATATACATTTGAAGGGTGATAAAAAATCAATCCTTGCAACTGATCATAATATTATA…	MALFGELYECEEFFNEETFNIKEGEFYNYDDYRDLEESFDYSAHPEYVESNDVTLINKNNDDYDDDNKSYIKNIEIDIKENFDKISTRYLFLYINKYKEMYIKNMKGLYEVHFYDIHLKGDKKSILATDHNIIEYCMENLMNINNNPDDNNNDTNNKSVHSSDNMHINKDERYNIYRDKKKKKKKKRVYDLFCIYAIILKYFPYSFKLWYHYIKDSIEMITDVYYRNKKNYKYINKIFDQCLLYMYNFKSIYIMYIQFLYIQRDVKKIRQIFNLSLQNVYLNQQNDLWECQLLFNEKINNKVINYEYIKRYVTIYPEQIIHLFKHYVKYKMYKNAMITFFYILNSEDNFDLGNFSKYDIYQEIYKLLNSKGSLNNDIIHLLRNNLYIFKNYESITSIYI…	1031	1	null	no	GO_0006396	GO_0000349	GO_0006396,GO_0000349	0	0	0	0	0	0	0	0	0	0	0	0	0	0	0	0	0	0	0	0	0	0	0	0	0	0	0	0	0	0	0	0	0	0	0	0	0
437	PF3D7_0308600	pre-mRNA-processing factor 19, putative	PRPF19	ATGTCAATAATATGCACCATAAGTGGCCAGACACCTGAAGAACCTGTTATAAGTAAAACGGGATATATTTTTGAGAAAAGATTAATTGAGAAACACATAATTAATTATGGTATATGTCCTGTAAGTGGTGAAGTTTTAACACTAGAAGATTTATATCCAATAAAAAATGAAAAGATAGTCAAACCTAGACCTATTACGGCTAGTAGTATTCCTGGATTATTATCCATTTTTCAAACCGAATGGGATTCGATTATATCAGAAATGTTTAGCCTAAGAACACATGTTAATGATATACGTAATGAATTAAGCCATAGCTTGTATCAATATGATGCTGCTACTAGGGTTATAGCTAAATTATTAAAAGAGAAAAATGGTTATAAAGAAGAAATAGAAAATTTA…	MSIICTISGQTPEEPVISKTGYIFEKRLIEKHIINYGICPVSGEVLTLEDLYPIKNEKIVKPRPITASSIPGLLSIFQTEWDSIISEMFSLRTHVNDIRNELSHSLYQYDAATRVIAKLLKEKNGYKEEIENLKKQIFQLKSSNDLDIYEIGLNEELLEKMQNVAKDLLINRKKRKIDNVCSVEQWKDFKNTNEFNIHSSTIPGVTCITLDVNKYKYNYNDDHMKHNFFSGGNDGNVYYVSLNDNKILSKLQGHLKKVNSIISHPSNFICITASNDKTIRIWKGDDNNVHHNDNGDSDSDNNNNNNDNDGSHLNNNEYIYDNYQFVSAHVITKHKDHVTSLALHPLENYFISSSKDSMWILHDLETAKTIKTSKDNPSSFKHLAIHPDGMMFGIAAQDS…	532	0	null	no	GO_0007023, GO_0016567, GO_0007021	GO_0000349	GO_0007023,GO_0016567,GO_0007021,GO_0000349	0	0	0	0	0	0	0	0	0	0	0	0	0	0	0	0	0	0	0	0	0	0	0	0	0	0	0	0	0	0	0	0	0	0	0	0	0
3662	PF3D7_1231500	mitosis protein dim1, putative	null	ATGTTATACCATTTACATAGCGGCTGGGACGTTGACCAAGCTATATTAAGCGAAGAAGAAAGATTAGTTTGTATTCGTTTTGGTCATGATTATGACCCAGATTGTATGAAAATGGATGAGTTATTATTTAAAGTAGTAGAAGACATAAAAAATTTTTGTGTTATTTATTTAGTAGATATTACAGAAGTTCCTGACTTTAATACTATGTATGAATTATATGATCCTGTTTCTGTTATGTTTTTTTATCGAAACAAACATATGATGATTGATCTAGGTACTGGAAATAATAATAAAATTAATTGGCCTATGAATAATAAACAAGAATTTATTGATATCGTAGAAACAATTTTTAGAGGTGCAAGAAAAGGAAGAGGTTTAGTTATATCCCCAAAAGATTAT…	MLYHLHSGWDVDQAILSEEERLVCIRFGHDYDPDCMKMDELLFKVVEDIKNFCVIYLVDITEVPDFNTMYELYDPVSVMFFYRNKHMMIDLGTGNNNKINWPMNNKQEFIDIVETIFRGARKGRGLVISPKDYSTKYKY	139	0	null	no	GO_0000398, GO_0007067	GO_0000375, GO_0000245	GO_0000398,GO_0007067,GO_0000375,GO_0000245	0	0	0	0	0	0	0	0	0	0	0	0	0	0	0	0	0	0	0	0	0	0	0	0	0	0	0	0	0	0	0	0	0	0	0	0	0
3129	PF3D7_1126900	small nuclear ribonucleoprotein F, putative	SNRPF	ATGTCAGTGGGTATTGCTCCTCTTAACCCTAAGCCATTTTTAAACAGTTTGGCTGGTAATCGAGTAATTATAAAATTAAAATGGGGAATGGAATATAAAGGTATATTGAAATCCTTTGACGGCTACATGAACATAAGACTAACAAACGCAGAAGAATGGATACATGGAGAATTCAAAGGAACGCTTGGTGAAATATTTTTAAGATGCAATAATATCTTATATATAAGGGAAGATAATGAAAAAACAAAAACGGACCTTTGA	MSVGIAPLNPKPFLNSLAGNRVIIKLKWGMEYKGILKSFDGYMNIRLTNAEEWIHGEFKGTLGEIFLRCNNILYIREDNEKTKTDL	86	0	null	no	GO_0006396	GO_0000398	GO_0006396,GO_0000398	0	0	0	0	0	0	0	0	0	0	0	0	0	0	0	0	0	0	0	0	0	0	0	0	0	0	0	0	0	0	0	0	0	0	0	0	0
5317	PF3D7_1474500	splicing factor 3A subunit 1, putative	SF3A1	ATGCTCAATATTATTGTTGAAAAAAGCCTATTTGATGACGATGTGGATATACATGATAAAGAAGTGTTGCAGAAGAGGTTCAACTTTTTGGAGAAAGAAATGATAGTACCTCCAAATAATATAAAAACTGTTATTGATAAAACGGCTACGTTTGTTAAGAAAAATGGAAAAAACTTTGAACAGAAAATATATAGAGAAAAAGAAAAGCAATTTGGTTTTATTAGTCCTTCACATCCATATTTTTATTATTATCAATATAAATTACATGGTTTGTTTTTGGATATTCAAGAAAAGGATGAATTAATTCCTCATGTTATTAAAGAAATAAAAAAAAGAGAAGATGCGAATAAATATACAAATAATGAACATATTTTAAAAATATGTGATTTTATAAAAGAA…	MLNIIVEKSLFDDDVDIHDKEVLQKRFNFLEKEMIVPPNNIKTVIDKTATFVKKNGKNFEQKIYREKEKQFGFISPSHPYFYYYQYKLHGLFLDIQEKDELIPHVIKEIKKREDANKYTNNEHILKICDFIKEDEKEERKNIIYSLDDMKKIDKLENNNNLKIQIQEDIYSLISPFITSLDIDLIKTTALFVARNGKSFLNGLIEREKNNSQYDFLRANNLYFNYFSKLIDIYLKCLLPSDDILDKIKKYANNKSNILNYSYILYSHNKKKKEEEERKLEEKNKSDTYYDWTHFSIVETINFEDDLKNLPCSIDFNNVENYVISELFDTDKMYTNEEKLNNISYHEKNVFKTLGKEELYEDNMGQEIFLDDNKYDARRDELYDEKYEDKHSEQNDEHDG…	701	0	null	no	GO_0006396	GO_0000398	GO_0006396,GO_0000398	0	0	0	0	0	0	0	0	0	0	0	0	0	0	0	0	0	0	0	0	0	0	0	0	0	0	0	0	0	0	0	0	0	0	0	0	0
1029	PF3D7_0520300	U6 snRNA-associated Sm-like protein LSm2, putative	LSM2	ATGCTTTTTTTTACATTTTTTCAACAACTAGCTGAGAAAAATCATCATGTTACTGTCGAATTAAAAAATGATTTACAAATATCAGGAGTTTTGCATTCAGTTGATCAATATTTAAATATAAAATTAACGAATGTGTCAGTAAATAATCCAGAGAAATATCCTCATTTGTTATCGATAAAATCATGTTTTGTTAGAGGATCTGTAGTTAGATATGTTTTCTTACCTTCAAATGAGATTGATGTTCAAAAGTTACATCATATGTGCAGACAAGAAGCAAAAATGGTAGCCGAGAAAGAAAAAGAAAAGAAATAA	MLFFTFFQQLAEKNHHVTVELKNDLQISGVLHSVDQYLNIKLTNVSVNNPEKYPHLLSIKSCFVRGSVVRYVFLPSNEIDVQKLHHMCRQEAKMVAEKEKEKK	103	0	null	no	GO_0006397	GO_0000398	GO_0006397,GO_0000398	0	0	0	0	0	0	0	0	0	0	0	0	0	0	0	0	0	0	0	0	0	0	0	0	0	0	0	0	0	0	0	0	0	0	0	0	0
5261	PF3D7_1468800	splicing factor U2AF large subunit, putative	U2AF2	ATGTGGAAAAAGCTTACTTCACTTAAAAATAGTAATTGCAAATCTGATGTAAGTAATATAGAAGAAAATGATAAAAAAAATGTAAAAAAAAGTGATACACAAAATGAAGATTCCGAAAAAAAAAGTACAGGAACTAGTAATGGTATGTTAAGTATTAAAAAAAAAGATACTAATGAAACTGATAAAACAGATGAATATAATTTAGATTCAAATAAAAAAAAAAAAAGCTTTTACCAAAAAAAAAAAACAAGTAATAAAGAAATTGAAGAACCAAAAGATATATTAAAAGATGATACCAAAGACGTTATTGTAGATGATGATACAAATATAAAAGAAAATGATAATCTTAAAAATGAGTTTATCTCCAGTAATAATAAAAAAAAAGAAAAATATGAAAAA…	MWKKLTSLKNSNCKSDVSNIEENDKKNVKKSDTQNEDSEKKSTGTSNGMLSIKKKDTNETDKTDEYNLDSNKKKKSFYQKKKTSNKEIEEPKDILKDDTKDVIVDDDTNIKENDNLKNEFISSNNKKKEKYEKDLECNEERIHNDKKMNHCHDKEQNEKENEDKESKQIDIKEVKNSIEKIKEKFGKNVDEKIRRNESLDKKKDAHSVKNKTGNRNSTSRSRSRNRNRSKDRYLNKRKTIEVHSNSEENKQEKRRTKSRERSIEYRKKSKDKWRDRSKEKSRQRSRDRSKERSRQRSRDRWRDRSRDRWGLDRRRSRYKDSRDRNKFSYHSRSISSDEEHYSKNKKRTKRRKSRHNIDKDSYSSSSNSTHRRRNRKSSSSNNTRKDDNNSIQKKRKKSK…	833	0	null	no	GO_0006397	GO_0000398	GO_0006397,GO_0000398	0	0	0	0	0	0	0	0	0	0	0	0	0	0	0	0	0	0	0	0	0	0	0	0	0	0	0	0	0	0	0	0	0	0	0	0	0
2308	PF3D7_0922700	pre-mRNA-splicing factor 18, putative	PRP18	ATGGACTCGCTGGATAGTTTTATAAAAAAGAAAAAAGAAGAAATAAAAGAAATTAAAGGAAACAAAAGATGGTTTAAACAAGCAGATTTGGAAAATCAAAAGAATAAGGAGATTAATAACTTTTATGAAAAAGAACTAAAAAAAAAGAAAATTGAAGAATATGAAAGATTAAAGAAATTAAATGACACATTAGATGAAAAACATAAAAAAAATAATGCGGATGTAGAAAATGAGGAAACAAATATAGAAATAACATTAAGTAATAAACAAATTATTATGCTACTTCGTCAATTAAAAGAACCAATTAGATTATTTGGAGAAACAGACTTACAGAGATATAATAGATTGAAGGAGTTAAAAATGAATAAAAATGAATTAAAAATTAATGAACAAAACATT…	MDSLDSFIKKKKEEIKEIKGNKRWFKQADLENQKNKEINNFYEKELKKKKIEEYERLKKLNDTLDEKHKKNNADVENEETNIEITLSNKQIIMLLRQLKEPIRLFGETDLQRYNRLKELKMNKNELKINEQNIFGDVLRGRLKEDSLDLIEDNIEDEIEKGSDKKDKNNSNVSISEKENNEKGKKIDKEKIIHEWIKRTMKEWNEEIENIVDSKKKIKQATYLQTHKDLKPLEKKLKQKTLESDILDKIYNIVSCCQEKNFKAAHDAYMLLAIGNAAWPMGVTMVGIHERAGRSKIYASEVAHILNDETTRKYIQMIKRLLSFCQRKYCTNPSEAVNLSTIHI	343	0	null	no	GO_0008380	GO_0000398	GO_0008380,GO_0000398	0	0	0	0	0	0	0	0	0	0	0	0	0	0	0	0	0	0	0	0	0	0	0	0	0	0	0	0	0	0	0	0	0	0	0	0	0
4314	PF3D7_1343900	U4/U6 small nuclear ribonucleoprotein PRP4, putative	PRPF4	ATGAAAATCGGTGATGTTCTTCATGATTATAAATTGTATGATAATACAAAAAAGAAAAGTAGTGAAATGGTTATTAATGAAAATGATAATAAAGAAAGGTTATTGGAAGAATTCGAAATAAGAAGTAAGGTAAGGAAAGTGTGTTTAGGTATACCTACTCAAGATATTGATGTAAAGAATATTTTGAGATTATTAAAGGAACCTATATGTTTATTTGGAGAAGATAGTTATGATAAAAGGAAACGATTAAAAAATATATTAATAACAAAATATGATAGACTAATAATTAAGAAAAAAATAGAAGAGGAAGATGATGTTGAAGAATTCAAAAATATATTAAAAAGGTATTATATAGATTTTAGTGATTTATATCCATCAGGTTTATCCGAAGCTAATAAA…	MKIGDVLHDYKLYDNTKKKSSEMVINENDNKERLLEEFEIRSKVRKVCLGIPTQDIDVKNILRLLKEPICLFGEDSYDKRKRLKNILITKYDRLIIKKKIEEEDDVEEFKNILKRYYIDFSDLYPSGLSEANKINEVHDKHKLKDVHDTKEEQNVHMKTVREEDKDILKEKCYTEGTKDLKKSRIEITIKTLPRIFLYKEMINKFQNGYSKKEYENYITSFNEHIKKESDLYVSQLGDDRPLTMGKFSPDNSVFAISSFNSYINIFNYRNDDYNLIKTLKNGHEEKINCIEWNYPNNYSYYSTMNYKDLSKHDLLLASCSSDKSFCIWKPFYDEYDDTNDNINDNINEYINENINENINENINENINDNISDNTSDTISDNINDNINDNISDSISDNIS…	648	0	null	no	GO_0008380	GO_0000398	GO_0008380,GO_0000398	0	0	0	0	0	0	0	0	0	0	0	0	0	0	0	0	0	0	0	0	0	0	0	0	0	0	0	0	0	0	0	0	0	0	0	0	0
4054	PF3D7_1317000	U4/U6.U5 tri-snRNP-associated protein 2, putative	USP39	ATGGAAAGGAAATCTAAGAAGAATTCAAAAAGTGAAAAAACAGAATCTGCTTCAAAAAAGAAAAAGAAAAAGGATGATGACATGAGTGAACCAGAAGAAGATGAACAAAAAATAAATGAGGTAGAAGATGGTTCTTTATTACTTAAAAGTGATAAAACAGAAAATAATGTAAATAATAATAATAATAATAATAATAATAATGATAATACCAATTATGATAACCAAAAGAATAACTTATTGTATAAAAAGAGAAATAGGGTGTGCCCATACCTACGTACCATTAATAGAAACCTTCTGGATTTTGACTTTGAAAAATTGTGTAGCATCAGTTTATCAAATTTACATGTATATGCTTGTTTAGTATGTGGTTTATATTTTCAAGGGATAGGAAAAGGGACT…	MERKSKKNSKSEKTESASKKKKKKDDDMSEPEEDEQKINEVEDGSLLLKSDKTENNVNNNNNNNNNNDNTNYDNQKNNLLYKKRNRVCPYLRTINRNLLDFDFEKLCSISLSNLHVYACLVCGLYFQGIGKGTHAYTHSLEKNHYVFINLETCKTCCIPEGYEIVDASLNDIKYFLKPTYNKEQVEHLCYNSVLGKSLDGGDFLPGLVGLNNLKNTDYCNVIIQLICSIIPLRNTLLLYECKENIAKNIIVVLSDLIKKIYNPRNFKGVVSPHEFLQAVGIESNKNFKIGTKKYPLDFFLWLLNKIYRHSNKMLKKRKLSTLKKKTGYMKRKLEDNEPVSKEEKKNLHDKEKIYDEMNKSDNTSNKKKEKDKWAYSNINIVDYCFDGELLIKTIKEEGN…	640	0	null	no	GO_0016579, GO_0006511	GO_0000398, GO_0000245	GO_0016579,GO_0006511,GO_0000398,GO_0000245	0	0	0	0	0	0	0	0	0	0	0	0	0	0	0	0	0	0	0	0	0	0	0	0	0	0	0	0	0	0	0	0	0	0	0	0	0
2765	PF3D7_1030000	transcription elongation factor SPT4, putative	SPT4	ATGTCAGCGTCTAAAGGAAGAAAGAAATCAGATTTAAAAAAAATTGATGATTCGTTTGTAGAAATTAATAAAGATTCTCCGAAGAAATCAAGGAGTGGACTACAAGAAGATAAAGCCTTATTAAAATTACGAGCATGTTTATCATGTCGTATGTTAAAATCGGAAAGTGAATTTTATCAAAATGGTTGTATTAATTGTAAGTTTTTGCAACTAGCGGGAGACAGGCACAGAATTCATGACTGCACTACAGAAAACTTTAATGGCTTTATGGCTATTACAACTCCTAATAAATCTTGGATGGCACAATATAATGATTTGAGTAAATATGCTCCTGGCTTTTATGCTTTACAAGTTATAGGAGAATTACCGGAATCGATAAGAGACCTAAAGCCAAATTAT…	MSASKGRKKSDLKKIDDSFVEINKDSPKKSRSGLQEDKALLKLRACLSCRMLKSESEFYQNGCINCKFLQLAGDRHRIHDCTTENFNGFMAITTPNKSWMAQYNDLSKYAPGFYALQVIGELPESIRDLKPNY	133	0	null	no	GO_0032786, GO_0006355	GO_0000398, GO_0006355	GO_0032786,GO_0006355,GO_0000398,GO_0006355	0	0	0	0	0	0	0	0	0	0	0	0	0	0	0	0	0	0	0	0	0	0	0	0	0	0	0	0	0	0	0	0	0	0	0	0	0
589	PF3D7_0323700	U4/U6.U5 tri-snRNP-associated protein 1, putative	SART1	ATGGATGATAACGTTTGTGAATTAAGCATAGAAGAAACAAATAAGTTAAGAGAAAAGTTAGGTCTGAAAAAATTAGAGATAACAAAAGACAATGTAAAAAAAAATGAGGACCATGATGATGAAAAGGCGGGTAAAAATAAAAGAAAAAATTCTAGTAATAATAAAACGAAGCAAATAGAAAAAGAGGAAGAACATGACGAACATGTGAAAAACACAAAAAAGAAAAAACAAAAAATAAAAACTATAAGTGAAGATTATAAAGATGACGTAAATGATGTTGAAGCATGGATAAATAAAACAAGAAATACAATGAACCAAAGACTAGAACAAGATGAACTTAAATATAGTGATGATGAAAATGAAGAACAATCATATAACAAGAAAAACAAAAAAAAAAAA…	MDDNVCELSIEETNKLREKLGLKKLEITKDNVKKNEDHDDEKAGKNKRKNSSNNKTKQIEKEEEHDEHVKNTKKKKQKIKTISEDYKDDVNDVEAWINKTRNTMNQRLEQDELKYSDDENEEQSYNKKNKKKKKKNSNDNDNDNENENFVSKVKVEHKNEDITEDMILTLKDQNILNSDQEDCLINEELKKKNMKSLLSKKDDNYWTKNYYDPLSYYDDNNNNNNNNLADNSSMQMLPKYKDEKHSFDVNVTYEKTQTKYKHEKDTEKKKKKNEYKNENNSISNNKNESHETNHMVQLKKRKIKNINKRKKEEDAWDFLYNDNTEEDNQESDTTNKYDESKRKEKILRHRRDERDERDEQVEKVEQDEQEQNVDILNDVINKIKEEQMDMDINYFDNPF…	693	0	null	no	GO_0000398	GO_0000481	GO_0000398,GO_0000481	0	0	0	0	0	0	0	0	0	0	0	0	0	0	0	0	0	0	0	0	0	0	0	0	0	0	0	0	0	0	0	0	0	0	0	0	0
2841	PF3D7_1037600	TFIIH basal transcription factor complex helicase XPB subunit, putative	XPB	ATGATGAATAGTTTGAAGGATTCATCTAATTATAGCCCCAATTTGTCTCATACAAGAGGTTCAAGGAAAAGATCAGATATTTTTAATGAGAATTATTATGCAAAAAATTTAAAAAGACGTAAATTGAAGGCTGCCAAGAAATTAAAAGATAGCACAAATGGAGAATTTACAAAAAAGGTAAAAAAACAATTAAAAGATTATTATGAAATGCGATTTGATAAAAAGGTAATAAACTTACCATTTAGCACAGATTCGATAAATATACAACAAAGAGGTTTTCATGATTATAGTAAAGATATGAAATTAAAAAAGAATCATATGAATAAGCCCTTGTGGATATGTTCAGATGGATTTATATATTTAGAAATGTTTAATAGTTGTAGTAAGCAAGCATCTGAT…	MMNSLKDSSNYSPNLSHTRGSRKRSDIFNENYYAKNLKRRKLKAAKKLKDSTNGEFTKKVKKQLKDYYEMRFDKKVINLPFSTDSINIQQRGFHDYSKDMKLKKNHMNKPLWICSDGFIYLEMFNSCSKQASDFLITIAEPICRPELIHEFQLTIFSLYAAISVGITLDELLINLDKFSKNVLPNELISNITKSAESFGKVKLVLRENKYYIEATNKSELDYLLNNDTIQNARIYSTDNNNDKNMISLYNLNNRHRDNNKNDNKNNNDDNNNIDKTTSNLLNEDQKGKDCYVTYEAPVLDTTQLGFKISESEKQLMMEEKKHANLNANENSTNSAEVYSFEVNCDKIEEVKQEALQTMQRPLLMEYDFRRDKKNPNLICSLKSHVQIRYYQEKALRKMF…	886	0	null	no	GO_0006289, GO_0006367	GO_0000717	GO_0006289,GO_0006367,GO_0000717	0	0	0	0	0	0	0	0	0	0	0	0	0	0	0	0	0	0	0	0	0	0	0	0	0	0	0	0	0	0	0	0	0	0	0	0	0
2565	PF3D7_1010600	eukaryotic translation initiation factor 2 subunit beta	eIF2beta	ATGGAAGATAAAGTTGAAGATGCTGGATCAGCTTTTGTTGATTTAGATAAAATAGTAAATGATGATTCGAAACAGTTATTTGATTTTGGTGAGAAGAAAAAGAAAAAGAAGAAGAAAGAGGTTGTAGAAAAGGTAGAAGAGATTATTATAGATGGTACAGGGAAAGTTTTTGAAAGAGGAGCTGTATATCCATATGATGAATTATTACATCGAATTCAAGATTTAATTAATAAACATAACATAGATTTATGTATATCTAAAAAATATACTATTAAACCCCCACAAGTAGTTCGAGTTGGATCAAAAAAAGTAGCATGGATTAATTTTAAAGATATATGTACTATTATGAATAGAAATGAAGAACATGTTTTCCATTTTGTTTTAGCAGAATTAGGAACT…	MEDKVEDAGSAFVDLDKIVNDDSKQLFDFGEKKKKKKKKEVVEKVEEIIIDGTGKVFERGAVYPYDELLHRIQDLINKHNIDLCISKKYTIKPPQVVRVGSKKVAWINFKDICTIMNRNEEHVFHFVLAELGTEGSIAGEGQLVLKGKYGPKHIEALLRKYITEYVTCQMCKSPNTTMEKDSRTRLFHQHCNACGAKRSVTTIKSGFHALGRGERRKAKHTN	222	0	null	no	GO_0006413	GO_0001731, GO_0006413	GO_0006413,GO_0001731,GO_0006413	0	0	0	0	0	0	0	0	0	0	0	0	0	0	0	0	0	0	0	0	0	0	0	0	0	0	0	0	0	0	0	0	0	0	0	0	0
3474	PF3D7_1211900	non-SERCA-type Ca2+ -transporting P-ATPase	ATP4	ATGAGTTCTCAAAATAATAATAAACAGGGTGGACAAGATATTAATAATAAAAAAGACAGTGATGACATAAAACCTTCTGTAAGCAAAGAAGATTTAATAAATTCATTAAAAAATGATGAATTAAATAAAAATACAACGATGGATCAAAACGACATGAAAAAAAATGAAAATATGAATATTAAGAAAAATGAAGTTTTAAATAATTCCAATAATGTAGAAGACGGAGATAATGAAAATTCGAAATTTATGAATAAAAGTAAAGAAGGATTGAATAATATAAATGGAGAAAAGAATGATGACAATAATTCTATTGTAAAAGTAGAAGAATCACCTAAATCTATAGGATATAATTATTATGCATCTGAAAGTATTGAAAATTTATGTAAAGAATTTGGTTTA…	MSSQNNNKQGGQDINNKKDSDDIKPSVSKEDLINSLKNDELNKNTTMDQNDMKKNENMNIKKNEVLNNSNNVEDGDNENSKFMNKSKEGLNNINGEKNDDNNSIVKVEESPKSIGYNYYASESIENLCKEFGLESINTGLNSEQVKINRDKYGENFIEKDEVVPVWLIFLSQYCSPVVLLLLVAAVASLALNEVVEGVAIISIVTLNACLATYMEKSSGDAIGKLAEMASPQCTVLRNGQKVVIPSREVVVGDVVLINTGDSISADLRLFDVIELKTNESLLTGESEDIKKTIVADNLSTPFATNLCFATTSVTSGSGKGIVISTGLDTQVGKIASQLKKSSKGSKLTPLQVALNKLGGLIGLIAIIVLVVIISLAVIIKYRDPAHADKDPTFVIIIIG…	1264	8	null	no	GO_0006812	GO_0002028, GO_0042493	GO_0006812,GO_0002028,GO_0042493	0	0	0	0	0	0	0	0	0	0	0	0	0	0	0	0	0	0	0	0	0	0	0	0	0	0	0	0	0	0	0	0	0	0	0	0	0
1970	PF3D7_0821700	60S ribosomal protein L22, putative	null	ATGGTGGCTAAAAAAGATAGTACAAAAGTTTCCAAGAAGCTCAAGAAAAAAGTTGTAAAGAAAACAAAAATTGTTAAGGGTTTGAAAAAACAAAAGATGAACAAGAGTACTAAGGGAATTAAATATGTTTTGGATTGTACCAAGCCTGTAAAGGATACAATTTTAGATATAAGCGGATTGGAACAATTTTTCAAGGATAAAATTAAAGTTGATAAGAAAACAAATAACTTGAAAAATAAAGTTGTAGTAACATCTGATGAATATAAAATTTATATCACCGTCCACATACCCTTTTCTAAAAGATACATAAAGTATTTGGCAAAGAAGTATATAAAGATGCACCAAATACGTGACTTCTTAAGAGTTATAGCTAAAGGAAAATTAGCCTACGAATTTAAA…	MVAKKDSTKVSKKLKKKVVKKTKIVKGLKKQKMNKSTKGIKYVLDCTKPVKDTILDISGLEQFFKDKIKVDKKTNNLKNKVVVTSDEYKIYITVHIPFSKRYIKYLAKKYIKMHQIRDFLRVIAKGKLAYEFKYFQLNN	139	0	null	no	GO_0006412	GO_0002181	GO_0006412,GO_0002181	0	0	0	0	0	0	0	0	0	0	0	0	0	0	0	0	0	0	0	0	0	0	0	0	0	0	0	0	0	0	0	0	0	0	0	0	0
2622	PF3D7_1015900	enolase	ENO	ATGGCTCATGTAATAACTCGTATTAATGCCCGTGAAATTTTAGATTCTAGAGGAAACCCAACTGTAGAAGTTGACTTAGAGACCAACTTAGGTATTTTCAGAGCTGCCGTACCATCTGGTGCCTCCACTGGTATTTATGAAGCCTTAGAATTAAGAGATAATGACAAGAGCAGGTACTTAGGAAAGGGTGTTCAAAAAGCTATCAAGAACATTAATGAAATTATTGCTCCAAAATTGATTGGAATGAATTGTACTGAACAAAAGAAAATTGACAATTTAATGGTTGAAGAATTAGATGGAAGTAAAAATGAATGGGGATGGTCAAAAAGTAAATTAGGAGCTAATGCTATTTTAGCTATATCCATGGCTGTATGTAGAGCTGGTGCAGCTGCTAATAAA…	MAHVITRINAREILDSRGNPTVEVDLETNLGIFRAAVPSGASTGIYEALELRDNDKSRYLGKGVQKAIKNINEIIAPKLIGMNCTEQKKIDNLMVEELDGSKNEWGWSKSKLGANAILAISMAVCRAGAAANKVSLYKYLAQLAGKKSDQMVLPVPCLNVINGGSHAGNKLSFQEFMIVPVGAPSFKEALRYGAEVYHTLKSEIKKKYGIDATNVGDEGGFAPNILNANEALDLLVTAIKSAGYEGKVKIAMDVAASEFYNSENKTYDLDFKTPNNDKSLVKTGAQLVDLYIDLVKKYPIVSIEDPFDQDDWENYAKLTAAIGKDVQIVGDDLLVTNPTRITKALEKNACNALLLKVNQIGSITEAIEACLLSQKNNWGVMVSHRSGETEDVFIADLVV…	446	0	null	no	GO_0006096	GO_0002253, GO_0000045, GO_0006094, GO_0006096, GO_0006351	GO_0006096,GO_0002253,GO_0000045,GO_0006094,GO_0006096,GO_0006351	0	0	0	0	0	0	0	0	0	0	0	0	0	0	0	0	0	0	0	0	0	0	0	0	0	0	0	0	0	0	0	0	0	0	0	0	0
207	PF3D7_0207400	serine repeat antigen 7	SERA7	ATGGTATATCGCTTATTTATTATTTTAGTATTGTATGTTATCTGTTGTACAAATGTAATAGTAGGACAAGAAAAGCCTCCTCCTGATAGTACTGTTGGTGCAAATCCAGGAGACGAACGTGAATCTTCTGGTAGAGTGAATAATCCTGCTTCAGGTGAGCAAGGTACTACAAATTCACCAACAGAACAACCAGATCAAACAAGAGATAGAAGTTCTTCCGTACCTCAAGGATCTCCAAGAGAACCTGTATCTCCTGAAAATCCAAATCCCGTTACACAAATTCCAGGAAATGGAGGTGCTCTTGTAACTCCAATTCCACTTCCAAAACTTACATTAGAAGATTCTGAATCTTCAAAATCTGTAATTGACATTGAAGTAAAATCTGCTCTTTTAAAAAAC…	MVYRLFIILVLYVICCTNVIVGQEKPPPDSTVGANPGDERESSGRVNNPASGEQGTTNSPTEQPDQTRDRSSSVPQGSPREPVSPENPNPVTQIPGNGGALVTPIPLPKLTLEDSESSKSVIDIEVKSALLKNYDGVKITGPCRSYFRVMLVPHITVYVYATYDRIQLEPKFGPSDLIDINDLTNKCNKDSNKYFKLVLYIKNNILILKWKVQDKDSKPTNIDVDVKKYKIPKLDRPFTSIQVYTVNTEHGLIESKNYDINSEIPEQCEAISTNCFLNGSLDVENCYHCTLLAKKVDSNNECFNYVSKEAKELINKNLEEKNKTFKGEDEDLDSNEQKLEESIDNILSNIYKIYESKQDKERKKSHYNNKKELVTIEELNSVLKIELLNYCKLLKEVDR…	946	1	HMM: MVYRLFIILVLYVICCTNVIVGQ, NN: MVYRLFIILVLYVICCTNVIVGQ	yes	GO_0006508	GO_0002377, GO_0006508, GO_0050776	GO_0006508,GO_0002377,GO_0006508,GO_0050776	0	0	0	0	0	0	0	0	0	0	0	0	0	0	0	0	0	0	0	0	0	0	0	0	0	0	0	0	0	0	0	0	0	0	0	0	0
208	PF3D7_0207500	serine repeat antigen 6	SERA6	ATGATATGTCCTATTTTTTTCCTTTATATAATAAATGTGTTATTTACGCAATATTTTATTAAATGTGAAGGAAATAAAGTGACTGTGATATCACATAATAATGGACATAACGATAATTTAGATGTTAATAAAAATGGTGTGATATCTCAGGAAAATGTATTTGATACTTCAGAAAGTTTAAATTTACCTTCAAATAAAAAAGTTGGTTCCGATGATTTGAATACTACAACTATTTCATTCACTGTACCAGATAATCTGGAAAATGAAGTAAAAGTTGTATCGTCATCTGAATCGGGAAAAGGTGCCACTGTATCTCATACGAAAGTGACATCTGAAGGTTTGTCTGATACGCAACCAAATGTAACCCAATCGGTATCTTCATCTACGCATACACCAGGT…	MICPIFFLYIINVLFTQYFIKCEGNKVTVISHNNGHNDNLDVNKNGVISQENVFDTSESLNLPSNKKVGSDDLNTTTISFTVPDNLENEVKVVSSSESGKGATVSHTKVTSEGLSDTQPNVTQSVSSSTHTPGSLDSTMSTEQHSSVSQSSLPTESSSETLNKATVPEIPIQINSGLLKNYNGVKVTGSCGSYFRVYLVPHILIYALTKYSVIQLESLFNDNARIDVEHKGELQNKCSEGYHFKLVVYITHNVLNLKWKTYKPNEESKSEDSDVRKYRIPKLERPFTSIQVYTANSKAGVIETKNYNIRTDIPDTCDAIATDCFLNGNVNIEKCFQCTLLVQKKDKSHECFKYVSSEMKKKMNEIKVKAQDDFNPNEYKLIESIDNILSKIYKKANKPF…	1031	0	HMM: MICPIFFLYIINVLFTQ, NN: MICPIFFLYIINVLFTQ	yes	GO_0006508	GO_0002377, GO_0006508, GO_0050776	GO_0006508,GO_0002377,GO_0006508,GO_0050776	0	0	0	0	0	0	0	0	0	0	0	0	0	0	0	0	0	0	0	0	0	0	0	0	0	0	0	0	0	0	0	0	0	0	0	0	0
210	PF3D7_0207700	serine repeat antigen 4	SERA4	ATGAAGATACACATTTTTTTGATCGCAACCATATATGTATTATTTAGTGAAAAGTTAATAAAATGGACAACCGCCAGTACTACTCAAGGAGGTGATACAGATACACATCCAGGTACTCCTCCAGGTGAAGGTTCAGATGTTAGTCAAGGCGCAGGTCAAGATGCTAGTCAAGGTGCAGGTCAAGATGCTAATCCAGATCCAACTCTACCTAAACCACCAAGTCCTCCTGCTGATGATACAAAAGATACTGGTTCCCAAGGAGATGCCGATTCTTCATCTTCAAAAATAGAAATCCCTCCATTAGTAAAGCCTGAAAATCATAAAACTATAGTTTCTGCTATGTTAAAAAATTATAAAGGTGTAAAAGTTACTGGAACATGTGGTGCAGATTTTGGTTTA…	MKIHIFLIATIYVLFSEKLIKWTTASTTQGGDTDTHPGTPPGEGSDVSQGAGQDASQGAGQDANPDPTLPKPPSPPADDTKDTGSQGDADSSSSKIEIPPLVKPENHKTIVSAMLKNYKGVKVTGTCGADFGLFLVPHIYVHVKSEDTEIELSSELAPPEMQTKFDKTQLKKFCVKDDTKKFDFIAYIYKDILVFKWKVYEEGLSKEQDVDEMKYLLPNLKQPITSIQVHSWTGTKESYILESKDYVLGEGMPEKCDAIATDCFLSGFTDIGKCFQCKLLMQEKNINDSCFKYVSSNQKELIKKQLKITAQDDEESSEYHLSESIKNLLKNIYKKNNDDNKKKELLHFENVNSALKSELLNYCNLLKEVNMNGVLKDHQLGNVQDVFNNLTKLLEEHKE…	962	0	HMM: MKIHIFLIATIYVLFSEKLIKWTTAS, NN: MKIHIFLIATIYVLFSEKLIKWTTAS	yes	GO_0006508	GO_0002377, GO_0006508, GO_0050776	GO_0006508,GO_0002377,GO_0006508,GO_0050776	0	0	0	0	0	0	0	0	0	0	0	0	0	0	0	0	0	0	0	0	0	0	0	0	0	0	0	0	0	0	0	0	0	0	0	0	0
211	PF3D7_0207800	serine repeat antigen 3	SERA3	ATGAAGTTCAGTATTTCCTTATTTCTAATATTGTGTGTCTTGTTTTGTAAAAATGACATAAAATGTACAACAGTGGACGAGAGTACCAAGGAAGGTTCTCAAAATCCTAAAAATTCATCCTCTACTACACCTGCATCTGGATCTCAAAAGGGTAGTTCTTCTGAATCACCAGGTTCAAGCGTAGAGAAACAATCACAAGAATCCAATAAAGAAAGTACCAATGGTGGTAATGTTGTAAGCCAAGGTACTCCTGCTAATACTTTTGGTCAAAATTCTAATAATCCTTCCGACTCACCCCAAGGTACTAGCACTCTTCCAAGTCCTCCTAAATCAATTGATGTAAAATCTGCTTTCTTAAAACATTACAAAGGAGTAAAGGTTACTGGTTCATGTAATGCA…	MKFSISLFLILCVLFCKNDIKCTTVDESTKEGSQNPKNSSSTTPASGSQKGSSSESPGSSVEKQSQESNKESTNGGNVVSQGTPANTFGQNSNNPSDSPQGTSTLPSPPKSIDVKSAFLKHYKGVKVTGSCNANFQLFLVPHIFINVETKENNIQLDVKFLKLTKRIDFAKDKSMLKNKCESGKNQTFKFVLYFKDDILTIKWKVYEEKSATPQKSEENTVDIKLYKLPKLDQTITSIQVHTLSIEGTSYLMESKDYSLGNNLPEKCDAIASDCFLSGNINVEKCLKCTLKVKKVEASDECYKYVSKDKPKETKLAVSGSEVKEVKAASVDHSNDKEYELSQSINNILNKMYKKESNDEKNNKKELIKLEDADDSLQKELNKYCNSLKEVDLNGVLSKN…	930	0	HMM: MKFSISLFLILCVLFCK, NN: MKFSISLFLILCVLFCKNDIKCT	yes	GO_0006508	GO_0002377, GO_0006508, GO_0050776	GO_0006508,GO_0002377,GO_0006508,GO_0050776	0	0	0	0	0	0	0	0	0	0	0	0	0	0	0	0	0	0	0	0	0	0	0	0	0	0	0	0	0	0	0	0	0	0	0	0	0
212	PF3D7_0207900	serine repeat antigen 2	SERA2	ATGAAGTTTCATATTTCCTTCTTTCTTATATTATATATTGTATTTTTTAAAAATACAATAAAGAGTGAAACCACTACAGATGAATCTGCTACAGGATCATTATCATCCGATGGTTCACGTGTAACAACACAAGCAAGAATTGAAAAACCAAAACAACAACCAACATTACCAACTTTAGCTCAAGAAACACAACCCCAACAACAGCAACAACAAAAAGAAGTAGGAAGTGGTATAGGAGCAGAACAAAAAGTAGAATCAGCAAGACCAGGTGCAGAAGTATCCCAATCAGATGTCGAAAGAGCAGGAAGATCATCAGGAACAGGAGGATCCGTAGGAACAAAGATATCACCTGGATCACAAGGGCAAGGGAAAGTAGCAGGACCACAATTACCACGATTA…	MKFHISFFLILYIVFFKNTIKSETTTDESATGSLSSDGSRVTTQARIEKPKQQPTLPTLAQETQPQQQQQQKEVGSGIGAEQKVESARPGAEVSQSDVERAGRSSGTGGSVGTKISPGSQGQGKVAGPQLPRLPQLPQSFEQSRNQQSSPVTPKRNGISPTNAKSPESVLPPAQSFTNLNKSTIPHTIPIKSSFLKYYKGVKITGSCGVQFQLVIVPHLFIYVETKENNIQLEPRFMKLNERIDFEKDKSNLKNKCDVNKKQSFKFILYLQHDLITIKWKVYEEKPDTTTRIAPGQVDLNVDVKRYKLPKLDQPVISIQIHSLAQDGETYLMESKDYNLEDQIPEKCEAIASDCFLSGNVDIEKCLQCTLLVIKADKNDECLKYVSKNVKDRFEEILTK…	1105	0	HMM: MKFHISFFLILYIVFFKNTIKSE, NN: MKFHISFFLILYIVFFKNTIKSE	yes	GO_0006508	GO_0002377, GO_0006508, GO_0050776	GO_0006508,GO_0002377,GO_0006508,GO_0050776	0	0	0	0	0	0	0	0	0	0	0	0	0	0	0	0	0	0	0	0	0	0	0	0	0	0	0	0	0	0	0	0	0	0	0	0	0
213	PF3D7_0208000	serine repeat antigen 1	SERA1	ATGAAGTTTTTTATACCTTATGTGTATATAATATGTGTTATATTTATCATAAATGTAATTCGTACAAGGGGGGAGGAAGATGATGATAATAATAATATTTCAGGTAAATCAATTTTAGGAACTAGCCATAATAATATATCAAATATAGATTTATCTTCTATTCCTAATTTGGATAGTAACATACATGCTAGTTTTTCAAGTGATACCAAAGAATGGTCACCCAATAATCTTACGTCTAAAAAAAAAAAAAAGAAAAAAGAAATAAGACCTAAAGATATTATGAGTAATAGTGATTCATCTAATACTTCATCAATAAATAAACAAAACAATAATCAAATAAAATCTGTTTTGTTAAAAGAAAATAAAGGAGTAAAAATTACTGGACCATGTAATGTAAAT…	MKFFIPYVYIICVIFIINVIRTRGEEDDDNNNISGKSILGTSHNNISNIDLSSIPNLDSNIHASFSSDTKEWSPNNLTSKKKKKKKEIRPKDIMSNSDSSNTSSINKQNNNQIKSVLLKENKGVKITGPCNVNLSIFLVPHIYIDVETKYNNIELKYELDEFSDSIKFKDTTTELRTSDDTLMNTNFNVGVSRDTLDKDRLYNICAENKTFKFVVYIKDNILTLKWKVYETGVTNNKVDIRQYKMKELTRPITTIQIHSVSENKDTHLLESKNYVIKTDIPETCDVMATNCFLSGNINIEKCLECTLLVQNNDTSSECFTYVSNDVRENFNQIKAEAEDDENFRNYHLTDTINNILKRIYKINKNEGKKELITLEELDNFLKESITDYCKILREIDTNG…	994	0	HMM: MKFFIPYVYIICVIFIINVIRTRGE, NN: MKFFIPYVYIICVIFIINVIRTRGE	yes	GO_0006508	GO_0002377, GO_0006508, GO_0050776	GO_0006508,GO_0002377,GO_0006508,GO_0050776	0	0	0	0	0	0	0	0	0	0	0	0	0	0	0	0	0	0	0	0	0	0	0	0	0	0	0	0	0	0	0	0	0	0	0	0	0
2104	PF3D7_0902800	serine repeat antigen 9	SERA9	ATGAAGGTTTCATTTACATTATTTTTTATAATATATATTATATTAAATTGTGATGTGTTAAAATGTGAAGTTGAATCTTCTGATAGTACCAGTTTCTTAAATTTGATTTCTGGTCAGAGTTCATCTAATTCGGATGATACTGTTTCTAGTTCAGATTCACGTGGTGTTGTTGCATCTGTTTCTGGTACAGTTGATTCTGATGTATCTAGAACAGATTCAACTGGAAATGTAAATAGTAAAAATTCTGAATTATCAGAAACAAGACAAAATTCTGTTGAACAAAATAATAATTCAAATAGTTCAGATAATTCGATTAAAATTAAATCTGCATTTTTAAAAGAAAATGTTGGTGTAAAAATTACTGGTCCATGTGATGAAGGGTTCGGTTTGGTTATGGTA…	MKVSFTLFFIIYIILNCDVLKCEVESSDSTSFLNLISGQSSSNSDDTVSSSDSRGVVASVSGTVDSDVSRTDSTGNVNSKNSELSETRQNSVEQNNNSNSSDNSIKIKSAFLKENVGVKITGPCDEGFGLVMVPHIIINVDTRNTDIQLGKKSSEINYGIKLRKKGKDEYEEKVGIDLLKNVCETGKNFKFVAYIKGDELIIKWKVIEEGNIPIDIKKFKIKRMSPPITSIQVFSSMSDEKSFVLENKNYVVTNNMPEKCEALATNCFLSGNIDIEKCYQCSLLVENDSKSDVCYNFISRENKEKLNEERFKVKGSTEYEESVESELKGAIDLLISSFYKSDGENGENVLISFEDLNSTLEDDIINFCSLLKLVDLSGTFMNHQIGTTADAFNNIVKLL…	932	0	HMM: MKVSFTLFFIIYIILNCD, NN: MKVSFTLFFIIYIILNCDVLKCE	yes	GO_0006508	GO_0002377, GO_0050776	GO_0006508,GO_0002377,GO_0050776	0	0	0	0	0	0	0	0	0	0	0	0	0	0	0	0	0	0	0	0	0	0	0	0	0	0	0	0	0	0	0	0	0	0	0	0	0
4163	PF3D7_1327800	ribose-phosphate pyrophosphokinase, putative	null	ATGATTTACAAATTTTACAATTGCTCAAGGAAGTTGTATGAGCACACAGAGAAATTAAAATATTTTATAACAAAAAATCAGTTAGTAAATACTTATCAAAATAAGTTTCAGAAAAGTATCTATTTTGTTTACAAAAATGGAAATAATGGGGGTTTTAATGAATATACCGTATTTTTAAATAACGAGAATAAACATTATAATGATAGAAAAAGTAACTTTAGAATGCATTATATTGTGTTTGCAAACGTATTAGGTTTAACAGTTCATGTAAAGAAAGATGAAAATTACGAAAACGAAAATATAAATTTTTTAAATAATGAACTATTAACAACTGATTCAACTGTAAATATAAATGAAAATGTTATAAGAAAAAATGAATTTAGTTTTATAGGTAAAAAT…	MIYKFYNCSRKLYEHTEKLKYFITKNQLVNTYQNKFQKSIYFVYKNGNNGGFNEYTVFLNNENKHYNDRKSNFRMHYIVFANVLGLTVHVKKDENYENENINFLNNELLTTDSTVNINENVIRKNEFSFIGKNKLFGNSNDNNTKQSDNVLKGNNKNGSKNDKYEYYQELSEYSNMQIFSSNSHHELANEICSNLGIGLGRAYVGKFSDGEIALQIMDEVRGRDIYIIHSTPAGGKDVHSRLMELFLFISTLRRSSAKKVTAVIPYLNYSRQTKHLDDHNYVHSLGAPEIAILLQACGVDSIISVDLHNARIEGFSTGKKFQPPLMNINPQSLAVEYFKKKKLRNPVVVSIDNEGAERTKEFWIRMNKHSMNAGFTTLVSSNYNEINSREGYPVNDSYE…	560	0	null	no	GO_0009165	GO_0006015	GO_0009165,GO_0006015	0	0	0	0	0	0	0	0	0	0	0	0	0	0	0	0	0	0	0	0	0	0	0	0	0	0	0	0	0	0	0	0	0	0	0	0	0
945	PF3D7_0511800	inositol-3-phosphate synthase	INO1	ATGGAGACGTACAAGGGGATTCAGTTTTTTTCAAATAAGGGAACCGTAAAGAATGCATTTAAGAAAAGCAATTTAGGATATGAAGTAATGTTAGATAGAAAAGAAGATGAGAATTTTATTTATTCAAATTATGAACATGTGGAAACACAAGTAGAAAAGGATTCTAAAGGTATGGTCGTATGTAAAAAATATAAGAATACTTATGAGATATTAGTTGAAAAGGTAAAAGAAAAAAGATTAGGAGTTTTATTAGTTGGGATAGGTGGTAATAATGCTACGACTATGTTAGGAGGTATTTGTGCGAATGCTAAAGATTTAAGTTATATGAATAAATGTGATTTAAAGAGATCTAATTATTTAGGTAGTGTTTTTTTATCATCTAATATTAGATTAGGATAT…	METYKGIQFFSNKGTVKNAFKKSNLGYEVMLDRKEDENFIYSNYEHVETQVEKDSKGMVVCKKYKNTYEILVEKVKEKRLGVLLVGIGGNNATTMLGGICANAKDLSYMNKCDLKRSNYLGSVFLSSNIRLGYNEKDKEHAYAPIYKLIDIYNPENIVYGGWDINNMNLKDCLVRNKVFDNEVIEKIKDDLDYVPLKSVYFKGNFIAGNQQRRVNNILYGKNKLEILEQVREQIRNFKKQNNLNELIVLWSGNTEKNIPHIPGVNDTFLNILHACKKNHESVSPSVIYALAAILENSPFINSSPQNTLVSAVVQLAQQKGIFIIGNDLKTGQTKIKNFLLDFYFGTGLKPKSIVSYNHLGNNDGKNLSSDLQFYSKKVSKSNLICDYVRANENLYVDDE…	604	0	null	no	GO_0006021, GO_0008654	GO_0006021	GO_0006021,GO_0008654,GO_0006021	0	0	0	0	0	0	0	0	0	0	0	0	0	0	0	0	0	0	0	0	0	0	0	0	0	0	0	0	0	0	0	0	0	0	0	0	0
3860	PF3D7_1252200	chitinase	CHT1	ATGAATTTTACTGTGAAATATTCATTTTTAGTTATTTGTTTATTATGCTGTTTATTAAGCACTTATGTAAGTGTCATTGAGGGACATCGAGCACGACCAGGTGAATCAAGAAAAAACCCGAGAGAAATTATAAAAACATTTAAAGAGAGTGGGAAAGGAATTATTCAAGGTTATTATCCATCATGGGTTTCTTATAATCATAACTTGAAAGATTTAAATCCTAATTTAAATGTTGTACATATGTCTTTTGCTAAGATGGATTTATCCTATGACAGTATAGAGAGTATTGTTGGTTCTCCTTTACTTTTCAAGTCATTAATAGGTTTAGAATATATAGGGTTAAACGAATATTTTAATGATGCCATGAATTTAAGAAAAGCTCGTCCAGATATTATTATG…	MNFTVKYSFLVICLLCCLLSTYVSVIEGHRARPGESRKNPREIIKTFKESGKGIIQGYYPSWVSYNHNLKDLNPNLNVVHMSFAKMDLSYDSIESIVGSPLLFKSLIGLEYIGLNEYFNDAMNLRKARPDIIMLLSLGGETYHPSSFDSALNAVEKIANLVDELGFDGIDVDYEPNGSFDGLNDKEKADFFVQYVTKLREYMCDDKLISISQSSNGALSCIGFNDPKKICMDDEAPYNSKYFNKPDVKKELLRAAQMASAGGAIYLMNNLKDMIDMVFVQTFNYTNSTDSTVMKELYDSYAYYGKKYDYVIIMGFTLMFPSTPFNPNDKMLVKSIGDFVKTENKLNKRADGFGLWSLSSDNAAHNEQLAIEYFVESLH	378	1	HMM: MNFTVKYSFLVICLLCCLLSTYVSVIEGH, NN: MNFTVKYSFLVICLLCCLLSTYVSV	yes	GO_0005975, GO_0006032	GO_0006032, GO_0030260	GO_0005975,GO_0006032,GO_0006032,GO_0030260	0	0	0	0	0	0	0	0	0	0	0	0	0	0	0	0	0	0	0	0	0	0	0	0	0	0	0	0	0	0	0	0	0	0	0	0	0
3160	PF3D7_1130000	phosphoacetylglucosamine mutase, putative	PAGM	ATGAACATTATTTGTAACATGAAAGATTTTAAAGAGAGTTGGTTTTATAAAAAAATAAAACCGTGTATTAAGAAATATATGCCAAAATATACGAATGAAGGACACATCATATTTCAAAATCCTTATGAGTTCTCATATGGTAATTGTGGTTATAGAGAAAAATATAATTTATCGTCATGTGATTTATTAAATGCCATAAATAAATGTGGAATATTTGTAGGGTTGTTATTTATAAAATATAATTATGATATAATATTTAATCAAAAAGAAAAAAGAAATGACTTTACCACAACAAAAGGGAATAACAATAATTATGAAAATAAAGATGAGAACAATGAAAAGAAAAATGAAAAGAAAAATGAAAAGAAAAATGAAAAGAAAAATAAAAACAAAAATGAA…	MNIICNMKDFKESWFYKKIKPCIKKYMPKYTNEGHIIFQNPYEFSYGNCGYREKYNLSSCDLLNAINKCGIFVGLLFIKYNYDIIFNQKEKRNDFTTTKGNNNNYENKDENNEKKNEKKNEKKNEKKNKNKNEKKNKNKNENNEKKNENKNKNKNENNENTNENNKNNKNNKNNKNNKNNSNSNNNNNYYYYNHYNMCEKIHKDLVYNYNEYIKLKNVGIIITASHNPHDENGIKIIGVDGKYINKTYENYLIELVNNHLRYIKKNVNCTCDDIINNTIELIVDIFKKEINLDISDDIIYENISILDDIIYNYNIHNKIKTNICIGFDTRNSNIHLNNIIIESLNCLNIYKCINNITYITTPCMHFLIYFLNYINENDEKIDKQIIQQEEYTIHKKSND…	940	0	null	no	GO_0005975, GO_0071704	GO_0006041	GO_0005975,GO_0071704,GO_0006041	0	0	0	0	0	0	0	0	0	0	0	0	0	0	0	0	0	0	0	0	0	0	0	0	0	0	0	0	0	0	0	0	0	0	0	0	0
2716	PF3D7_1025100	glutamine--fructose-6-phosphate aminotransferase [isomerizing], putative	GFPT	ATGAATTTTAAATTCAAAACAGTAATACACAATTTAAAAAGTAAATTCAAACATGAATTTGTGTCTGATAAAAAGCAATTATATTTTTGTAATATTATGAAAAATAAATATAATGTATATGAAAATATTGGGTTTTTAAATTATGGTTGTTCAATTAAAAAATATTTATTTTACAATCGTAAAGAAGATCAAGATGAGGAATTTAAAGGTTCATTTAAAAATGGGACAATGAACGGTCTTAAAATATGGAAATATAATAATATATCATCACAAAAAGATACATATAATAATATATCATCACAAAAAGATACATATAATAATATATCATCACATAAAAATACATATAATAATATATCATCACATAAAAATACATATAATAATGTATCATCACATAAAAAT…	MNFKFKTVIHNLKSKFKHEFVSDKKQLYFCNIMKNKYNVYENIGFLNYGCSIKKYLFYNRKEDQDEEFKGSFKNGTMNGLKIWKYNNISSQKDTYNNISSQKDTYNNISSHKNTYNNISSHKNTYNNVSSHKNTYNNISSHKDTYNKYYYALFNNNIFNQKKLYIFFMAICLALNKFLNTQEENNENNNSLKKKKKKKIMNSHFFGLSNETASCCGIMAYMGNRDASKILIDGIEILQNRGYDSCGMSTISNKNVLKTTKYASNTTCDAIEKLKSNYLNSHKNDHIGIAHTRWATHGCKTDENAHPHVDYGERISIVHNGIIENYREIKTFLLKNNIPFKSNTDTEVVANLIGYFLDKKQSFQDAVLSAITQLEGTWSFCIIHKNHPDEMILASNGSPL…	829	0	null	no	GO_0016051, GO_1901137, GO_1901135, GO_0005975	GO_0006041	GO_0016051,GO_1901137,GO_1901135,GO_0005975,GO_0006041	0	0	0	0	0	0	0	0	0	0	0	0	0	0	0	0	0	0	0	0	0	0	0	0	0	0	0	0	0	0	0	0	0	0	0	0	0
4311	PF3D7_1343600	UDP-N-acetylglucosamine pyrophosphorylase, putative	null	ATGCAAAAAGTTTTTGAACTGTTAGAACAATACAATCAAGATTTGCTTCTAGAGTATTTTAAAAAGTTTCCATCATTTGATTTTAATAATTTAAATGCGAACGATTTAGAACATTTTTTACAAAATTTGAACAAAATAAAAAATGAAGATAAAGAAAAGAAAGAATATTTAATATCACCACCTGAAATTATTGATATTGATAGTATTTATAATTGTAGTAAGCCACCAAATGGTAGTATATTTATCAATACATATAAAAAAGAAAATTTATGTAATGAATTAAATGAAATAGGTATAGAGATTATTAAGAAAAATCAAGTTTCTGTTTTATTCTTAGCTGGAGGATTAGGTTCTAGGCTTGGATTAAATAAACCTAAAGTATTATTAGAAGTCACTCCT…	MQKVFELLEQYNQDLLLEYFKKFPSFDFNNLNANDLEHFLQNLNKIKNEDKEKKEYLISPPEIIDIDSIYNCSKPPNGSIFINTYKKENLCNELNEIGIEIIKKNQVSVLFLAGGLGSRLGLNKPKVLLEVTPLTNKTFLQFFFEQIIFLQEYCSLYEKKEHLNKINDNHKLVNSDNFKKGINNNIHINKNNDMYSNNNNNNNIDYNKSEHSKSSITNLNNIKGTNYNKCKINLDKHQFKNQEKKETLIYIYIMTSNFTHDNIVTYLQNNNFFGLKKEQVIFFKQCDNFSTDMNYNLLLSSPEIFLENPGGNGCIFKALDRYNIIDHMIKQNIKYTQIISIDNILNKIADPILIGFSSSFNCDIANKAVQREDEESMGVFCLKEKVKNKINKKYNKKNK…	593	0	null	no	GO_0008152	GO_0006047	GO_0008152,GO_0006047	0	0	0	0	0	0	0	0	0	0	0	0	0	0	0	0	0	0	0	0	0	0	0	0	0	0	0	0	0	0	0	0	0	0	0	0	0
4390	PF3D7_1351600	glycerol kinase	GK	ATGAATGTCATATTAAGTATAGACCAAAGTACACAATCAACCAAAGTGTTTTTCTATGATGAAGAATTAAATATTGTTCATTCGAATAATTTAAATCATGAACAAAAATGTTTGAAACCTGGTTGGTATGAACATGATCCAATAGAGATTATGACCAACTTATATAATTTAATGAATGAAGGAATAAAAGTGTTAAAAGATAAATATACATCTGTTATAATAAAATGTATAGGTATTACTAACCAAAGAGAAACTGTAATTATATGGGATAGAATAACAGGAAAACCTTTATACAATGCTATAGTTTGGCTAGATACACGTGTAGAAGAACTTGTTACGGAATTTTCTGCGAAATATAATAATAATGATATTCAGAAAAAAACAGGAACTTACTTTAAT…	MNVILSIDQSTQSTKVFFYDEELNIVHSNNLNHEQKCLKPGWYEHDPIEIMTNLYNLMNEGIKVLKDKYTSVIIKCIGITNQRETVIIWDRITGKPLYNAIVWLDTRVEELVTEFSAKYNNNDIQKKTGTYFNTYFSAFKILWLIQNNPEIKQKIDDGTAVIGNINTWLIFNLTKGNCYTDVTNASRTLLMDINTLQWDEKMCKIFNITNMSVLPEIKSNCSNFGLVKSEHVPDYLNIPITGCIGDQQSACIGQAIFDEGEAKCTYGTGVFLLINTGEKVVYSTCGLITTICYKFNDNDKPKYALEGSIGTAGSGVSWLLKNKLIDDPSEASDIMEKCENTTGVIFVPAFSGLYAPRWRSDARASIYGMTFNTERSHIVRALLEGIAFQLNEIVDSLTS…	501	0	null	no	GO_0005975, GO_0006072	GO_0006071	GO_0005975,GO_0006072,GO_0006071	0	0	0	0	0	0	0	0	0	0	0	0	0	0	0	0	0	0	0	0	0	0	0	0	0	0	0	0	0	0	0	0	0	0	0	0	0
3006	PF3D7_1114800	glycerol-3-phosphate dehydrogenase, putative	G3PDH	ATGTTGAAATTTTTCATTTTATATTTCTACCTTATATTTCAAGCAATTACATGTTTTTCTGTAAATCAGATTAATGTAGGAAATAAATATTCTCTGATAAGAAATCCTCAAAGTAATGTACCATTAAAGGTATCTATTATTGGTAGTGGGAATTGGGGAACAGTCGTTTCAAAAATTATTGGAATGAACGCTCAAAAGTTAAAAATATTTCATCCAATTGTTAAAATGTATGTTAAAGAAGAAATTGTGGAGGAAGAAAAACTATCTGATATTATCAATAAAAAGAAAGAAAACATAAAATATATGAAAGGAATGAAAATTCCTGAAAATATTCTAGCCATTTCAAACTTGAAGGAAGTTATTGATGATGCAGATTTGTTAATATTTGTATTACCACAC…	MLKFFILYFYLIFQAITCFSVNQINVGNKYSLIRNPQSNVPLKVSIIGSGNWGTVVSKIIGMNAQKLKIFHPIVKMYVKEEIVEEEKLSDIINKKKENIKYMKGMKIPENILAISNLKEVIDDADLLIFVLPHQYLDNVLDEIVQNNNLKKNARAISLIKGIKMVRSKPQLLSDIIEKKLDIECLALSGSNIAEELSREHFSESTIGFEKKGNEVIWQNLFDRTYFKVNCIQDKPGVEICGALKNVIALGVGFIDGLTASYNTKSAIIRIGLEEMKKFAKMFFPNVLDETFLDSCGLADLITTCLGGRNFKCAKEFAKRKGRDSWELIEAELLNGQKLQGIDTTKEVYDVLEYHQLKTEFPLICTIYEISFQKKNPCSIIDVLSTKKLRNIKYK	394	0	HMM: MLKFFILYFYLIFQAITCF, NN: MLKFFILYFYLIFQAITCFSV	yes	GO_0005975, GO_0046168, GO_0006072, GO_0055114	GO_0006072	GO_0005975,GO_0046168,GO_0006072,GO_0055114,GO_0006072	0	0	0	0	0	0	0	0	0	0	0	0	0	0	0	0	0	0	0	0	0	0	0	0	0	0	0	0	0	0	0	0	0	0	0	0	0
3516	PF3D7_1216200	glycerol-3-phosphate dehydrogenase [NAD(+)], putative	null	ATGTATAGAAACCTTTTTGACAAGTTGAAGGATGGTCCTCTGAAGATAAGTATTCTAGGAAGTGGTAACTGGGCTAGTGCCATTAGTAAAGTTGTTGGCACGAATGCCAAGAATAATTATTTATTCGAAAATGAAGTTAGGATGTGGATAAGAGATGAATTTGTAAATGGAGAAAGGATGGTCGATATAATTAATAATAAACATGAGAATACAAAATACTTAAAAGGTGTACCTTTACCTCATAATATTGTAGCTCATTCTGATTTAGCTAGTGTTATTAATGATGCTGATTTATTAATTTTTATCGTCCCATGTCAATATTTAGAAAGTGTGTTAGCCTCAATCAAAGAAAGTGAATCTATAAAAATAGCTAGCCACGCTAAAGCTATTTCTTTAACT…	MYRNLFDKLKDGPLKISILGSGNWASAISKVVGTNAKNNYLFENEVRMWIRDEFVNGERMVDIINNKHENTKYLKGVPLPHNIVAHSDLASVINDADLLIFIVPCQYLESVLASIKESESIKIASHAKAISLTKGFIVKKNQMKLCSNYISDFLNIPCSALSGANIAMDVAMENFSEATIGGNDKDSLVIWQRVFDLPYFKINCVNETIEVEICGALKNIITLACGFCDGLNLPTNSKSAIIRNGINEMILFGKVFFQKFNENILLESCGFADIITSFLAGRNAKCSAEFIKSTPKKTWEELENEILKGQKLQGTVTLKYVYHMIKEKNMTNEFPLFTVLHKISFENEDPSSLLKTFMNNKINQLNL	367	0	null	no	GO_0005975, GO_0046168, GO_0006072, GO_0055114	GO_0006072	GO_0005975,GO_0046168,GO_0006072,GO_0055114,GO_0006072	0	0	0	0	0	0	0	0	0	0	0	0	0	0	0	0	0	0	0	0	0	0	0	0	0	0	0	0	0	0	0	0	0	0	0	0	0
1955	PF3D7_0820200	phosphatidylglycerophosphate synthase	PGPS	ATGGCTCTGAAGTTTGTCATTCATGAACCTAAAGCAAAATTATTATTTACTCCTAAAGAATTTTTTAATACCTTAAATGACATTTTTAAGAACTCACAAAATCGTATTGTGATTAGCTGTTTATATATGGGAATAGGAGAATTAGAAAAAGAATTAATAGATAGTATAAAAAAGAATGTGAATATAAAAGATTTAAAAGTTGATATATTATTAGATAGACAAAGAGGTACAAGACTAGAAGGGAAATTTAATGAAAGTTCAGTTAGTATTTTATCAGAACTTTTTAAATGTTCAGATAATATTAATATAAGCTTATTTCATAATCCTTTATTAGGTCCTATACTTTATAATATCTTACCTCCTAGAGCAAATGAAGCTATAGGTGTAATGCATATGAAA…	MALKFVIHEPKAKLLFTPKEFFNTLNDIFKNSQNRIVISCLYMGIGELEKELIDSIKKNVNIKDLKVDILLDRQRGTRLEGKFNESSVSILSELFKCSDNINISLFHNPLLGPILYNILPPRANEAIGVMHMKIYIGDNILMLSGANLSDSYLRNRQDRYFVIENKFLADSIHNIINTIQGMSFTLNRDLTIKWENDLMNPLIDAYVFREQYYRRIRFMLQGIQKHISQYNKNYSYNNYYKNIKNDPINDKTYIYNNQNNNKYSYTSNEFRMLNSFSTDIFDKDTYNNKNQKNNHKKENMETHTLLDTNHGTCDSTINLLNNNQNENHTNNLFTYLNEKDEFFYPLFEKNKSILVLELSLQCGFSIPPIYDETDMLENLLKNIEKYDQSLVISSGYLNF…	661	0	null	no	GO_0008152	GO_0006072, GO_0006655	GO_0008152,GO_0006072,GO_0006655	0	0	0	0	0	0	0	0	0	0	0	0	0	0	0	0	0	0	0	0	0	0	0	0	0	0	0	0	0	0	0	0	0	0	0	0	0
1912	PF3D7_0815900	dihydrolipoyl dehydrogenase, apicoplast	aLipDH	ATGGTCATAAGGCAAAATATTAAACATATCGTTAAACTTAACGTCGTTACTCTAATTTGGTTATCTTATCTTTTTCTTCTTAAACCTCATGGAACTTTGAAAAATATGATGGTGTGTAATGCTGTCCTTCTTCCATTTAATGAGAAAAATAAAGGCATAAATAATTTTGTGTATATTAACCCAAAGAATATTATTTTGAATAAAATAAAAAAAGATGTCATAAAACTAGAAAAAGATAATATCATCCTCTGCCAACACAATAGAAAAAGAGATAACTATATTAAACAACAAAAACGAAAAGAAAAAAACGCGAATAATTTTACATTTATGTTAAAAGGAAGTACACAAAATATTATGAACATTAATGAAAAAGAATATGATCTTGCTATAATCGGTTGT…	MVIRQNIKHIVKLNVVTLIWLSYLFLLKPHGTLKNMMVCNAVLLPFNEKNKGINNFVYINPKNIILNKIKKDVIKLEKDNIILCQHNRKRDNYIKQQKRKEKNANNFTFMLKGSTQNIMNINEKEYDLAIIGCGVGGHAAAINAMERNLKVIIFAGDENCIGGTCVNVGCIPSKALLYATNKYRELKNLDKLYYYGIHSNIFQNNKNTEIENNQLVSNSFQINITKLKEYTQSVIDKLRNGISHGFKTLKFNKNSEHVQVIYEHGQLLDKNTIKSKKSGNTYKVKNIIIATGSVPNIPNNVEIDDKSVFTSDMAVKLVGLKNYMSIIGMGIIGLEFADIYTALGSEITFLEYSSELLPIIDNDVAKYFERVFLKNKPVNYHLNTEVKYIKASKNNNPVI…	666	1	HMM: MVIRQNIKHIVKLNVVTLIWLSYLFLLKPHGTLK, NN: MVIRQNIKHIVKLNVVTLIWLSYLFLLKPHGTLK	yes	GO_0045454, GO_0055114	GO_0006086	GO_0045454,GO_0055114,GO_0006086	0	0	0	0	0	0	0	0	0	0	0	0	0	0	0	0	0	0	0	0	0	0	0	0	0	0	0	0	0	0	0	0	0	0	0	0	0
2673	PF3D7_1020800	dihydrolipoamide acyltransferase component E2	DLAT	ATGTTATACAACTTAATTATATTAATTTTTTATTTAAGATTTTCTAAATGTATTTCTAAGAACAATAATTACGGTTACATCAACTTCGGTACCTTTTCAAATGTTGTAAACAACAGTAATAATTTAAGAAATAGAAAAAATGTTGTTTTTTCAAAAATAGAAATAAAAATGCCAGCTCTATCTAGTACCATGACGACAGGCAAAATTGTTAAATGGAATAAAAATATAGGAGATTATGTAAATCTAGGTGATATTATAATGACCGTTGAAAGTGATAAAGCAGACATGGACGTGGAAGCATTTGATGAAGGCTTTTTAAGGGTTAAGCGTTTAGAAGATGGATGTGAAGCAAATGTTGGAGATGTCCTAGGAGTTTTAACTACAGAGGAAAACGAAAAT…	MLYNLIILIFYLRFSKCISKNNNYGYINFGTFSNVVNNSNNLRNRKNVVFSKIEIKMPALSSTMTTGKIVKWNKNIGDYVNLGDIIMTVESDKADMDVEAFDEGFLRVKRLEDGCEANVGDVLGVLTTEENENMDEKKYNDGDINKTENEIKVLNPDKDKSEQIIKEDIHFVKKHINDDVNEEKIFIPFIKCKKKKAKINKWLKNENDFVKKNDLLLYVEDDKSTIEVESPYSGIIKKLLVKEGQFVDLDKEVAIISITEEKDNEKEKIEEPFKNKEDEEINRDNILIHYINKIKKSEEGRKFLKNLSEQEEKTLEERLKLNYEKYNKISNDLFRSSESTKDYVLKEKENESQYEMVLPSASELMRQNKLNPKDITNRKTPNRITYEDVDAFLNGHKNN…	640	0	HMM: MLYNLIILIFYLRFSKCI, NN: MLYNLIILIFYLRFSKCISK	yes	GO_0008152	GO_0006086, GO_0006633, GO_0006099	GO_0008152,GO_0006086,GO_0006633,GO_0006099	0	0	0	0	0	0	0	0	0	0	0	0	0	0	0	0	0	0	0	0	0	0	0	0	0	0	0	0	0	0	0	0	0	0	0	0	0
3105	PF3D7_1124500	pyruvate dehydrogenase E1 component subunit alpha	pdhA	ATGCTGTTAGTAATATGGTTAAACATTTTTTGGTTCATCCCTTATTATTGTTTTAATTACGTTTTATGTGTAGGGAATAAAAATGACATGCTTTTTGTAAAAAATAAAAATCTAATATATCCTTATAATGATATGAATAGAATAAGGAGACATAAAGGGGTGGAACTAAGCAGAAAGATGGTTGCTGAGAATATTCAAATGAGAAATATGAAGAGTAACAATAATAGTAATAATGTTCATGAGAATAATAATATTGATCATAGTAACAATTATAATAATAATTTATATTTATCATGTAGTAATAAAAAAAAAGGAAAAGATGTACAATCATTGTGTGCCATAAAACACGGCAACGTACTGATCAAAAATATAAATGAAGAAGAAAAAGAAAAGGGAATT…	MLLVIWLNIFWFIPYYCFNYVLCVGNKNDMLFVKNKNLIYPYNDMNRIRRHKGVELSRKMVAENIQMRNMKSNNNSNNVHENNNIDHSNNYNNNLYLSCSNKKKGKDVQSLCAIKHGNVLIKNINEEEKEKGIKKNDTDKLESKNDNEHKNEENNFVFSYDKKLNNYSEFNIYMENNNIEEYISDVNISREEICTLYEDMYLGRLFENLVAKLYYNKRVNGFVHLYNGQEAVSTGIIKNLKNSDFVTSTYRDHVHALSKGVPAHKILNELYGNYYGSTNKGKGGSMHIYSKENNFIGGFGFIGEQIPIAVGLAYSILYKNEFHYNPKNTSFTSTKNKNNYIQENENMIHMNNSQNVDVVVCFLGDGTTNIGQFFESLNLASSYNLPIIFVIENNNWAIG…	608	2	HMM: MLLVIWLNIFWFIPYYCFNYVLCV, NN: MLLVIWLNIFWFIPYYCF	yes	GO_0008152	GO_0006086, GO_0006633, GO_0006099	GO_0008152,GO_0006086,GO_0006633,GO_0006099	0	0	0	0	0	0	0	0	0	0	0	0	0	0	0	0	0	0	0	0	0	0	0	0	0	0	0	0	0	0	0	0	0	0	0	0	0
5036	PF3D7_1446400	pyruvate dehydrogenase E1 component subunit beta	pdhB	ATGGGGAGAAAAAGAAACAATATTGTAAACATTAGATATAATTTTTTCTTGATTTATTTTTGGGTGATATTTATGTATCCATGCGAGACAAATAAAGGAAATGTGAAGCCACTAAATTTTATAAAAGGAAAGAATATTTTTTTGAATATAACTAAAAACAAAGTGAAGCATTTAAATACAATAAATGGAATTGAAACTATATCGAATGTTGAGAACAAAAATATTTTGAATGATACAAATTATATAAATGAAATGAAGAATATAAAGGTTAGAAGAAATATAAGTGAAGCTTTACATATGGCCATATATGAAGAAATGAAAAAAGATAAAGGTGTATATGTACTTGGAGAAGATGTAGGATTGTATGGAGGTTCGTATAAAGTTACTAAAAATTTAGCT…	MGRKRNNIVNIRYNFFLIYFWVIFMYPCETNKGNVKPLNFIKGKNIFLNITKNKVKHLNTINGIETISNVENKNILNDTNYINEMKNIKVRRNISEALHMAIYEEMKKDKGVYVLGEDVGLYGGSYKVTKNLAHFFGFSRVLDTPICENAFMGLGIGSAINDLRPIIEGMNLSFLILAFNQISNNACMMRYMCDGQFNIPIVIRGPGGIGKQLGPEHSQRIESYLMSIPGIKIVSCSTPFNARGLLKSAIRDNNPILFIEHVLLYNYEQEIPLLPYTLPIDKAEVVKNGKDLTVLSYGITRHLASEAAKELTKFNIDIEVIDLISLKPFDMETIEKSLKKTKKCLILDESAGFGGIGAELYTQVIEMFSSYLITKPIRLCTKDIPIAYSNKYEDACIIK…	415	1	HMM: MGRKRNNIVNIRYNFFLIYFWVIFMYPCETN, NN: MGRKRNNIVNIRYNFFLIYFWVIFMYPCETN	yes	GO_0008152	GO_0006086, GO_0006633, GO_0006099	GO_0008152,GO_0006086,GO_0006633,GO_0006099	0	0	0	0	0	0	0	0	0	0	0	0	0	0	0	0	0	0	0	0	0	0	0	0	0	0	0	0	0	0	0	0	0	0	0	0	0
4137	PF3D7_1325200	lactate dehydrogenase, putative	null	ATGACATCAGTAAAACATCCCAAAATAAGTGTCTTGGGGGCAGGGGATATAGGTTGCGCTTTGGCTCATATGATTTGTGAAAAAAATTTAGGAGATGTCGTTTTACATGATTTTCGTAAAGATTTACCAAAAGGAAGAGCGTTAGATATATTACACACAAGACCATTAAATAGATCCAGGATAAATATATTAGGAACAAATGAAATAACCGATATTAAAGATTCCTTAGTTGTAGTAGTAACAATAGAAGTATCTGAGAGAGAATTTGCAGAATTTGATGAAGAGGATTTAGAAAAACAAGTATATACATCCAATGTGAAATTGTTGAAAGAAGTTGCAAAGTCATTAAAAAAACATTGTCCCCAAGCATTTGTAGTAGTAACAACAAGTCCTGTTGAT…	MTSVKHPKISVLGAGDIGCALAHMICEKNLGDVVLHDFRKDLPKGRALDILHTRPLNRSRINILGTNEITDIKDSLVVVVTIEVSEREFAEFDEEDLEKQVYTSNVKLLKEVAKSLKKHCPQAFVVVTTSPVDCMAKVLQEHANIPPHKICGMAGVLHSARLRHNLAEKLRVNPGDVQGFVIGAHGDKMVPLPRYCCVNGIPLSDFTKKGAITEKEINQIVEKTRNTGFELLELLPEGSVCFAPSLAIVEIIEAYLKDLKRVLVCSVLLNGHYGHKGVFAGIPVVIGGKGIEKIIELDLNTQEKELFDDSLKHISYLFDNYKHETVVDDENKPN	334	0	null	no	GO_0005975, GO_0044262, GO_0006096, GO_0006108, GO_0055114, GO_0006099, GO_0006100	GO_0006089, GO_0006090	GO_0005975,GO_0044262,GO_0006096,GO_0006108,GO_0055114,GO_0006099,GO_0006100,GO_0006089,GO_0006090	0	0	0	0	0	0	0	0	0	0	0	0	0	0	0	0	0	0	0	0	0	0	0	0	0	0	0	0	0	0	0	0	0	0	0	0	0
1311	PF3D7_0616800	malate:quinone oxidoreductase, putative	MQO	ATGATATGTGTTAAAAATATTTTGAAAAGATATAAAAATAGTCCGTTAAACGAACTACGTAATAATAGGAAATATTATGAAGGGTCATTTGTAAAAAGTATAAAATTTAGTACATCAAATTATGGAAGTAATGAAAAAAAACCAAATGATATTGAAAAGAATAAGAATGTATCTATAAATCTTAATGAAGGTAATATTTTACAAAGTGAAATATATGATACAGTTGTCATAGGAGGAGGGGTAACAGGTACTGCTTTGTTTTTTTTATTATCTAAATTTACTAATTTAAAAAAGCTAGCCATAATTGAAAGAAGAGATAATTTTGCTTTAGTAGCATCACATGGAAAAAATAATAGTCAAACAATTCATTGTGGTGATATTGAAACCAATTATTCTTTT…	MICVKNILKRYKNSPLNELRNNRKYYEGSFVKSIKFSTSNYGSNEKKPNDIEKNKNVSINLNEGNILQSEIYDTVVIGGGVTGTALFFLLSKFTNLKKLAIIERRDNFALVASHGKNNSQTIHCGDIETNYSFEKAKFIKRYADMLRNYLTNIPKEKRENISSVTQKMVLGVGEKECQFLEERYPVFRQLFNSMKLYNKDDIHEVEPRVALKDSHTLREEQLSALYMPPELTTCDYQKLSESFIESARTVPNKTISINLLTEVINIEEVNDSLYKIHTNKGIINSRFVVVCACGHSLMIAQKMNYGLEYSCMPVAGSFYFTDNILKGKVYTIQNPALPFAAVHGDPDIIEKGKTRFGPTAIPLPLLERDNIKTLLDFLKVWNPDLSLFQVYYNLFKDMT…	521	0	null	no	GO_0055114, GO_0006099	GO_0006090	GO_0055114,GO_0006099,GO_0006090	0	0	0	0	0	0	0	0	0	0	0	0	0	0	0	0	0	0	0	0	0	0	0	0	0	0	0	0	0	0	0	0	0	0	0	0	0
2548	PF3D7_1008900	adenylate kinase	AK1	ATGAATGAAAATTTAGAAAATTTTTCAACAATTGATTTGTTGAATGAATTAAAGAGGAGGTATGCATGTTTGAGTAAACCAGATGGTAGATATATTTTTTTAGGTGCCCCAGGATCTGGAAAAGGAACACAATCCTTGAACCTTAAGAAGTCTCATTGTTACTGTCATTTATCAACAGGTGATTTGTTAAGAGAAGCAGCTGAGAAAAAAACGGAACTTGGACTTAAAATTAAGAACATCATTAATGAAGGGAAATTAGTTGATGATCAAATGGTATTGTCACTAGTCGATGAGAAATTAAAAACACCTCAATGTAAAAAAGGATTTATTCTTGATGGATATCCAAGAAATGTAAAACAAGCTGAAGATTTAAATAAGCTACTACAAAAAAATCAAACA…	MNENLENFSTIDLLNELKRRYACLSKPDGRYIFLGAPGSGKGTQSLNLKKSHCYCHLSTGDLLREAAEKKTELGLKIKNIINEGKLVDDQMVLSLVDEKLKTPQCKKGFILDGYPRNVKQAEDLNKLLQKNQTKLDGVFYFNVPDEVLVNRISGRLIHKPSGRIYHKIFNPPKVPFRDDVTNEPLIQREDDNEDVLKKRLTVFKSETSPLISYYKNKNLLINLDATQPANDLEKKISQHIDG	242	0	null	no	GO_0006139	GO_0006091	GO_0006139,GO_0006091	0	0	0	0	0	0	0	0	0	0	0	0	0	0	0	0	0	0	0	0	0	0	0	0	0	0	0	0	0	0	0	0	0	0	0	0	0
1421	PF3D7_0627800	acetyl-CoA synthetase, putative	ACS	ATGAATAATTTGAAGAGTTATGGAAGTCTATCAAAAGTCGACTCTGTTCAAATCAACGGTATGGATATAGATACAAATATTTTTCTTAATATGAATTCTTACCCTACCAAGGAAATATATGATGATGAGAATAATAAGAATGATGGAAATCATAACATAAAAAATTTCCAAGCATATAAAGCAATGTATGAAGAGAGTATAAATAATCCAGAAGCTTTTTGGGGAAATTTAGCAAAGAATAATTTAATATGGTATAAATTATTTACTAAAGTATTTTTAGGTAATTTTAAAAAAGGAAATATAAATTGGTTTGTTAATGGGAAAATTAATGCTTGTGAAAATTGTGTTGATAGATGGGTTGAAAAAGATCCTAATAAAATTGCACTTATATGGGAACAA…	MNNLKSYGSLSKVDSVQINGMDIDTNIFLNMNSYPTKEIYDDENNKNDGNHNIKNFQAYKAMYEESINNPEAFWGNLAKNNLIWYKLFTKVFLGNFKKGNINWFVNGKINACENCVDRWVEKDPNKIALIWEQDCPDQYKKITYQKLLEKTCKVANLLKLIGVKKQDTVTIYLPMIPELIYSMLACVRIGAIHNVVFAGYSAASLSDRIIDSRSTVLITSDFGLRGGKLTKLKQIADVAMDMCGMIQTCIVFKNKTKMKDKNIQIKTPMENPIYNFTSFDSNSAQNFTINNSNDFIQIKSTHSHQSDHQNDFSLQQEDNNYTKNSNMSYTTSMYYHDNNLNHINTNKNNDHYNNNLNNKNYLNNNINDQSPMYVHTMNHNDNNDDNNNNNNNNNVDDDN…	997	0	null	no	GO_0008152	GO_0006091	GO_0008152,GO_0006091	0	0	0	0	0	0	0	0	0	0	0	0	0	0	0	0	0	0	0	0	0	0	0	0	0	0	0	0	0	0	0	0	0	0	0	0	0
4303	PF3D7_1342800	phosphoenolpyruvate carboxykinase	PEPCK	ATGGTTGAAAAGTCGTCTGACTATGATTTAGCAGAAAAGATGGAAGACATGAAAAAGATTGTTATAGAAGAAGTTAGAAGAAATTTGATATACAAGAAACCTATAGGACCTATTATGAGCTCAAAAGACATTTTAACATTAAGCCAAGAACAAGAATCTAAATTTAATGAAGAAGTACATGAATTAGGGTTACATGTAAATAGTATACATCACAATTCAACTCCAGCATTTTTATATGAAATGGCATTAAAATATGAAGGTAATTCTTTTATTACTAGTACAGGTGCTTTGTGTTGTATATCGGGAGAGAAAACTGGTAGATCTCCATCTGATAAAAGAATTGTACAAGAAAAAAGTTCAGAAGATGATATATGGTGGGGTAATGTAAATATACCAATT…	MVEKSSDYDLAEKMEDMKKIVIEEVRRNLIYKKPIGPIMSSKDILTLSQEQESKFNEEVHELGLHVNSIHHNSTPAFLYEMALKYEGNSFITSTGALCCISGEKTGRSPSDKRIVQEKSSEDDIWWGNVNIPIKEKSYEINKSRAIDYLNLQPNLYVIDAYAGWDERCRIKVRVITSRAYHALYMLNMLIPPKNAEEIQNFVPDFIIYNAGEFPSNRLTDGMSSKTSVILNFGSMNMVILGTQYAGEMKKGILTLFMYKMPKEGKLPLHSSCNIGKKNDVTLFFGLSGTGKTTLSADANRYLIGDDEHVWTDDGIFNIEGGCYAKCKGLSKRQEPEIYKAIKFGAILENVVMDPVTREVDYNNCTITENTRCAYPLSYIENAKIPAYIHTHPQNIILLT…	583	0	null	no	GO_0006094	GO_0006094	GO_0006094,GO_0006094	0	0	0	0	0	0	0	0	0	0	0	0	0	0	0	0	0	0	0	0	0	0	0	0	0	0	0	0	0	0	0	0	0	0	0	0	0
4935	PF3D7_1436000	glucose-6-phosphate isomerase	GPI	ATGAATATGGAGATTACAAATTTGAAGAGCTATAAGGAACTTGTCACCTTAAGCGCTGAAGAAAAAACAAAGGATCTAAAGGACTATTTAAATGATAAGAATAGATCTGAATCGTTAATAAAGAAGTTTAAGAATTTTTATATGGATTTATCTCGTCAAAGGTATAGCGAAAAGACTTTAAACAAATTAGTTGAATATGCTGAAGAGGTAGAATTAAAGAAGAAGGTTGAAAAAACATTTATGGGAGAAAAAGTTAATATGACAGAGAATCGCAGTGTTTTACATACAGCTTTAAGAATACCCATAGAGAAAATAAATACACATAAAATAATAATTGATAATAAGAATGTGTTAGAAGACGTACATGGAGTATTAAAAAAAATAGAGAAATATTCAGAT…	MNMEITNLKSYKELVTLSAEEKTKDLKDYLNDKNRSESLIKKFKNFYMDLSRQRYSEKTLNKLVEYAEEVELKKKVEKTFMGEKVNMTENRSVLHTALRIPIEKINTHKIIIDNKNVLEDVHGVLKKIEKYSDDIRNGVIKTCKNTKFKNVICIGIGGSYLGTEFVYEAMKYYYYNMELNKNEKDQVNNFNNNYDQDNVFNVRFLANVDPNDVNRAIQNLDQYDTLVIIISKTFTTAETMLNARSIKKWLSLKIKDDENLSKHMVAVSTNLKLTDEFGISRDNVFEFWDWVGGRFSVTSSVGILPLSIAFGYKNMRNFLNGCHDMDEHFLHADLKENIPVLLALTSFYNSHFFDYKNVAILPYFQNLLKFSAHIQQLSMESNGKSVDRNNQPIHYNTCQ…	579	0	null	no	GO_0006094, GO_0006096	GO_0006094, GO_0006096, GO_0006098	GO_0006094,GO_0006096,GO_0006094,GO_0006096,GO_0006098	0	0	0	0	0	0	0	0	0	0	0	0	0	0	0	0	0	0	0	0	0	0	0	0	0	0	0	0	0	0	0	0	0	0	0	0	0
4134	PF3D7_1324900	L-lactate dehydrogenase	LDH	ATGGCACCAAAAGCAAAAATCGTTTTAGTTGGCTCAGGTATGATTGGAGGAGTAATGGCTACCTTAATTGTTCAGAAAAATTTAGGAGATGTAGTTTTGTTCGATATTGTAAAGAACATGCCACATGGAAAAGCTTTAGATACATCTCATACTAATGTTATGGCATATTCAAATTGCAAAGTAAGTGGTTCAAACACTTATGACGATTTGGCTGGAGCAGATGTAGTAATAGTAACAGCTGGATTTACCAAGGCCCCAGGAAAGAGTGACAAAGAATGGAATAGAGATGATTTATTACCATTAAACAACAAGATTATGATTGAAATTGGTGGTCATATTAAGAAGAATTGTCCAAATGCTTTTATTATTGTTGTAACAAACCCAGTAGATGTTATGGTA…	MAPKAKIVLVGSGMIGGVMATLIVQKNLGDVVLFDIVKNMPHGKALDTSHTNVMAYSNCKVSGSNTYDDLAGADVVIVTAGFTKAPGKSDKEWNRDDLLPLNNKIMIEIGGHIKKNCPNAFIIVVTNPVDVMVQLLHQHSGVPKNKIIGLGGVLDTSRLKYYISQKLNVCPRDVNAHIVGAHGNKMVLLKRYITVGGIPLQEFINNKLISDAELEAIFDRTVNTALEIVNLHASPYVAPAAAIIEMAESYLKDLKKVLICSTLLEGQYGHSDIFGGTPVVLGANGVEQVIELQLNSEEKAKFDEAIAETKRMKALA	316	1	HMM: MAPKAKIVLVGSGMIGGVMAT, NN: MAPKAKIVLVGSGMIGGVMAT	yes	GO_0005975, GO_0019752, GO_0044262, GO_0055114	GO_0006096	GO_0005975,GO_0019752,GO_0044262,GO_0055114,GO_0006096	0	0	0	0	0	0	0	0	0	0	0	0	0	0	0	0	0	0	0	0	0	0	0	0	0	0	0	0	0	0	0	0	0	0	0	0	0
2836	PF3D7_1037100	pyruvate kinase 2	PyKII	ATGAATTTAATTCATATTTGTTTATTTATCATAGTAATAAAATGTTATGTTAATTGCATAAAAAAGAATAACAAACATATTGCCTATGATAAATTTTATAAGCAAGGAAGTAATACCATTGTAGGTTCTGGCAATGGATCGGGGGATTTATTATTTTTGAATAATATAAATATAAATAAAAACGTAGAAAGAAAAAAGAACATTCTCGCACATAGCGAAATAGGGACTGTAAGAAATATAGATGATATAAATCTACTTAATCATAATAAGAAAAATGAAATATCTTTTACAAAATGTAAACAGATTGCTACTATAGGTCCTGCGTCGGAAAATTTTGAACAGCTAGAAAAATTATACTTAAATGGTATAGATGTTTTTAGATTAAATTTTTCACATGGA…	MNLIHICLFIIVIKCYVNCIKKNNKHIAYDKFYKQGSNTIVGSGNGSGDLLFLNNININKNVERKKNILAHSEIGTVRNIDDINLLNHNKKNEISFTKCKQIATIGPASENFEQLEKLYLNGIDVFRLNFSHGLKSIKKYIINSIRILEKKYDTTIGILGDIQGPKIRIGEFEKNQINENDNNTFVELKEGDLFSFDLMNSLGNQNRVQLNYPELIKNAKAGQIILLDDGNLKMKILENNYDTSNIQNSYIKVQVLTGGKLYSKKGFCIPNMIMPIDVLSEKDIKDILFCINEEVDFLGYSFVQTEYDLIFLRNIINDYYESDFYNNIKRKDRINFDQNNLQMKTFDDENDFYIKEVNDYYNNYYLKNVQKYKQIYDVYKNQDLYINDNIQNHYNKNIV…	745	0	HMM: MNLIHICLFIIVIKCYVNCI, NN: MNLIHICLFIIVIKCYVNCI	yes	GO_0006096	GO_0006096	GO_0006096,GO_0006096	0	0	0	0	0	0	0	0	0	0	0	0	0	0	0	0	0	0	0	0	0	0	0	0	0	0	0	0	0	0	0	0	0	0	0	0	0
3061	PF3D7_1120100	phosphoglycerate mutase, putative	PGM1	ATGACTACTTATACTTTAGTTCTTTTAAGACATGGTGAAAGTACATGGAACAAGGAAAACAAGTTCACAGGATGGACCGATGTTCCTTTAAGTGAAAAGGGAGAAGAAGAAGCAATAGCTGCTGGAAAATACCTTAAGGAAAAGAATTTCAAATTCGACGTTGTTTATACATCAGTTTTGAAGAGAGCAATTTGCACAGCCTGGAATGTATTAAAAACAGCTGACCTTTTACATGTTCCAGTTGTTAAAACTTGGAGATTAAATGAAAGGCACTATGGTTCCCTTCAAGGTTTAAACAAATCAGAAACAGCCAAGAAGTATGGAGAGGAACAAGTAAAAATATGGAGAAGATCATATGATATCCCTCCACCAAAATTAGATAAGGAAGATAACAGATGG…	MTTYTLVLLRHGESTWNKENKFTGWTDVPLSEKGEEEAIAAGKYLKEKNFKFDVVYTSVLKRAICTAWNVLKTADLLHVPVVKTWRLNERHYGSLQGLNKSETAKKYGEEQVKIWRRSYDIPPPKLDKEDNRWPGHNVVYKNVPKDALPFTECLKDTVERVLPFWFDHIAPDILANKKVMVAAHGNSLRGLVKHLDNLSEADVLELNIPTGVPLVYELDENLKPIKHYYLLDSEELKKKMDEVANQGKAK	250	0	null	no	GO_0006096	GO_0006096	GO_0006096,GO_0006096	0	0	0	0	0	0	0	0	0	0	0	0	0	0	0	0	0	0	0	0	0	0	0	0	0	0	0	0	0	0	0	0	0	0	0	0	0
540	PF3D7_0318800	triosephosphate isomerase, putative	null	ATGTTAAAAACACTTGTGTTATTATCTTTTTATTCTCTATATACCGTATTCCAAAAATCAACCAACTGTCTAACTATATATTCTTCCTTCCGAAAAAAAGGAAAGGAATGTTATGTATTAATTTCTTCTACTTATATATTAAAAAATAAAAGTAAAAAACTTTCAAGAGATACATGCAGAATCCTGAAAAAATTCGAACGGAATAATTCGAGTGATAAAAAATTTATAAAAACATATTGCATAGAAAATAAAAATGATTATATGGAAAATATATTAACCCATGATGAACAAAAAAAAAAAAAAAAAAAAAAAAAAATTTTAATAGCTAACTGGAAATGCTATTTATCAAAAGAGGAAGCATATAAATTAATTGATAGTTTGACAAGAATTAAATATTCT…	MLKTLVLLSFYSLYTVFQKSTNCLTIYSSFRKKGKECYVLISSTYILKNKSKKLSRDTCRILKKFERNNSSDKKFIKTYCIENKNDYMENILTHDEQKKKKKKKKILIANWKCYLSKEEAYKLIDSLTRIKYSNYVDVILSLNLLYIPYLLQKIKENNSKIYACSQDVSLVNGFGPFTGETTAKLIQDFGNEYTLIGHSERRQGFYKNGETIEEIVLKVYNAINSKLKVILCTGDDYKNCDNPSSSYKMMELLRLIKTKISKDEMKNIIIAFEPRFAIGTGQPVSYDILNKYYYELKRDIAKEIDKSTSEEMMIVYGGSISKSNMKHYVDNTHVDGFLIGKASLNEDFIDIIRYVDH	357	0	HMM: MLKTLVLLSFYSLYTVFQK, NN: MLKTLVLLSFYSLYTVFQKSTNCL	yes	GO_0008152	GO_0006096	GO_0008152,GO_0006096	0	0	0	0	0	0	0	0	0	0	0	0	0	0	0	0	0	0	0	0	0	0	0	0	0	0	0	0	0	0	0	0	0	0	0	0	0
1382	PF3D7_0624000	hexokinase	HK	ATGAGTGAGTACGATATTGCAAAAAATGATGTAACATATACCAAGTTAGATACAATAGAATGTGATATACCAATAAATGAAGAGTTATCATGGAGAATTAATAAATTTGTGAATCAGTTAAGAATATCTTATTCAACATTAGAAGAATTTGTAGACAATTTTGTATATGAATTAAAGAAAGGTTTAGAAGCTCATCGTAAACATCCAAATTTATGGATTCCTCATGAGTGTAGTTTTAAGATGTTGGATTCATGTATTGCTAATATTCCTACTGGTCAAGAGAAGGGTACATATTATGCTATAGATTTCGGTGGTACTAATTTTCGAGCTGTAAGAGCTTCATTAGATGGAAAAGGAAAAATAAAGAGAGATCAAGAAACATATAGTTTAAAATTTACA…	MSEYDIAKNDVTYTKLDTIECDIPINEELSWRINKFVNQLRISYSTLEEFVDNFVYELKKGLEAHRKHPNLWIPHECSFKMLDSCIANIPTGQEKGTYYAIDFGGTNFRAVRASLDGKGKIKRDQETYSLKFTGSYSHEKGLLDKHATASQLFDHFAERIKYIMGEFNDLDNKEVKSVGFTFSFPCTSPSINCSILIDWTKGFETGRATNDPVEGRDVCKLMNDAFVRAAIPAKVCCVLNDAVGTLMSCAYQKGRGTPPCYIGIILGTGSNGCYYEPEWKKYKYAGKIINIEFGNFDKDLPTSPIDLVMDWYSANRSRQLFEKMISGAYLGEIVRRFMVNVLQSACSKKMWISDSFNSESGSVVLNDTSKNFEDSRKVAKAAWDMDFTDEQIYVLRKIC…	493	0	null	no	GO_0005975, GO_0046835, GO_0001678	GO_0006096, GO_0042493	GO_0005975,GO_0046835,GO_0001678,GO_0006096,GO_0042493	0	0	0	0	0	0	0	0	0	0	0	0	0	0	0	0	0	0	0	0	0	0	0	0	0	0	0	0	0	0	0	0	0	0	0	0	0
1411	PF3D7_0626800	pyruvate kinase	PyrK	ATGAGTTCATTTAAGTACAAAAACTCCGCCGCAGGTGCCAGTATGCAAAGTGCTGCTAACATAACCTTGAGACAAATTTTAGAACCCAATAATGTGAATTTACGTTCTAAGAAAACACACATTGTATGTACCTTAGGTCCAGCATGTAAATCTGTTGAAACACTTGTTAAATTGATTGATGCAGGTATGGATATTTGCCGTTTTAACTTTTCTCACGGTAGCCATGAAGATCACAAGGAAATGTTTAACAACGTGTTAAAAGCCCAAGAATTGAGGCCAAATTGCTTATTAGGAATGTTGTTAGATACTAAAGGGCCAGAAATCAGGACAGGGTTTTTAAAAAATAAAGAAGTTCACTTAAAAGAAGGTAGTAAATTAAAATTAGTAACCGATTATGAA…	MSSFKYKNSAAGASMQSAANITLRQILEPNNVNLRSKKTHIVCTLGPACKSVETLVKLIDAGMDICRFNFSHGSHEDHKEMFNNVLKAQELRPNCLLGMLLDTKGPEIRTGFLKNKEVHLKEGSKLKLVTDYEFLGDETCIACSYKKLPQSVKPGNIILIADGSVSCKVLETHEDHVITEVLNSAVIGERKNMNLPNVKVDLPIISEKDKNDILNFAIPMGCNFIAASFIQSADDVRLIRNLLGPRGRHIKIIPKIENIEGIIHFDKILAESDGIMIARGDLGMEISPEKVFLAQKLMISKCNLQGKPIITATQMLESMTKNPRPTRAEVTDVANAVLDGTDCVMLSGETAGGKFPVEAVTIMSKICLEAEACIDYKLLYQSLVNAIETPISVQEAVAR…	511	0	null	no	GO_0006096	GO_0006096, GO_0051289	GO_0006096,GO_0006096,GO_0051289	0	0	0	0	0	0	0	0	0	0	0	0	0	0	0	0	0	0	0	0	0	0	0	0	0	0	0	0	0	0	0	0	0	0	0	0	0
1339	PF3D7_0619500	acyl-CoA synthetase	ACS12	ATGAACCAAACAAATTCCTTAAAATCGTTTTTGAATATTGAAAATGTGAGTGACAGATTTGTAACGGATTTAAATACTTATAAGAAGCAATTTTCTTATAATGAATTATATGAAGAAATCGAAAAGTTTGTAAATTTTTTTGAAAGCATAAATATAAAAAGAGGAGATGAAATATCAATTATTTTATTTAATAGCATTGAATATATCATATCTTTTTTGAGTATTAATTTTAATCATAATATATGTTTACCACAAAACACGAATTTGAAAAAAGAGGAATATAAAAGATATTTAGTAAATAACTGTAAGTATATTATAATTCATGATTATGACGAAAATAATGAAGAATATTCAAGTATTAAAAATAAACATAGTTATTATAAAAATGTGTGTATTTAT…	MNQTNSLKSFLNIENVSDRFVTDLNTYKKQFSYNELYEEIEKFVNFFESINIKRGDEISIILFNSIEYIISFLSINFNHNICLPQNTNLKKEEYKRYLVNNCKYIIIHDYDENNEEYSSIKNKHSYYKNVCIYIKELAEEYGIGLIKIKKNKEKPYFTYSYINNGRKEELPNLNNDLKNEENNINKEEKNMLNSDICLHLHTSGTTSKVKIVQLSNTNIKTTITNITNSYNINRDDNTIIVMPLFHVHGLIGVLLPIIYCKGNILFQLGHSFSASEFWNNVENYNITYFSAIPTILKILIIRYEEDYLRKNKIKKNNDDDHDDDENNKCHKNPMNEKVKHKLRFIRTSSSSLDENLEKEIEEKFEVSVFQAYGMTEACHQVSSNKIIISSLSSPNNLQI…	1392	0	null	no	GO_0008152	GO_0006097	GO_0008152,GO_0006097	0	0	0	0	0	0	0	0	0	0	0	0	0	0	0	0	0	0	0	0	0	0	0	0	0	0	0	0	0	0	0	0	0	0	0	0	0
3550	PF3D7_1219900	ribulose-phosphate 3-epimerase, putative	null	ATGGGTACGTTAAAAGCTATAATTGCCCCTTCAGTACTTGCATCCAATATAAGCAAATTAGCTGAAGAAACACAACGAATGGAATCTTTGGGTGCAGAATGGATCCATTTAGATGTTATGGATATGCATTTTGTTCCTAATTTATCCTTTGGTCCACCTGTTATTAATAATTTAAAAAAATATACAAAAAGTATTTTTTTTGATGTACACTTAATGGTTGAATATCCAGAAAAATATGTACCATTGTTAAAAACATCAAATCAACTAACTTTTCATTTTGAAGCATTAAATGAAGATACCGAAAGATGTATACAATTAGCCAAAGAAATTAGAGATAATAATTTATGGTGTGGAATTTCTATCAAACCTAAAACTGATGTACAAAAATTAGTTCCCATA…	MGTLKAIIAPSVLASNISKLAEETQRMESLGAEWIHLDVMDMHFVPNLSFGPPVINNLKKYTKSIFFDVHLMVEYPEKYVPLLKTSNQLTFHFEALNEDTERCIQLAKEIRDNNLWCGISIKPKTDVQKLVPILDTNLINTVLVMTVEPGFGGQSFMHDMMGKVSFLRKKYKNLNIQVDGGLNIETTEISASHGANIIVAGTSIFNAEDPKYVIDTMRVSVQKYLNN	227	0	null	no	GO_0005975, GO_0008152, GO_0006098	GO_0006098	GO_0005975,GO_0008152,GO_0006098,GO_0006098	0	0	0	0	0	0	0	0	0	0	0	0	0	0	0	0	0	0	0	0	0	0	0	0	0	0	0	0	0	0	0	0	0	0	0	0	0
1249	PF3D7_0610800	transketolase	TK	ATGAACATTATGGATAACGAAATAGACACAAAGTGCATAAACGAAATTCGTATGTTATCAGCAGAATTACCATTAGAAGCAAAGAGTGGACATCAAGGAGCTCCAATAGGTTGTGCCCCTATAGCTCATATATTATGGTCTTATGTAATGAATTATTATAATGAAGATACGAAATGGATAAATAGAGATAGATTTATTTTGTCGAATGGTCATGCTAGTGCATTATTGTATACTATGTTATATTTAACAGAACAAGGATTAAGTATGGAAGATTTAAAATCGTTTCGACAATTTGGAAGTTTAACACCAGGTCATCCAGAAAATCATATAACAAAAGGTGTTGAAGTTACTACAGGACCATTAGGTCAAGGTGCTTCCAATGCTGTAGGTATGGCTATA…	MNIMDNEIDTKCINEIRMLSAELPLEAKSGHQGAPIGCAPIAHILWSYVMNYYNEDTKWINRDRFILSNGHASALLYTMLYLTEQGLSMEDLKSFRQFGSLTPGHPENHITKGVEVTTGPLGQGASNAVGMAIAAHNLADKYNTEEHKIFDNYVYAICGDGCMQEGVFCEAASLAGHLGLGRLILLYDDNKITIDGNTDLSFTENIEKKFEALNWEVRRVEDGNKDYKKILHEIEQGKKNLQQPTLIIVRTACGFGTKVEGTCKSHGLALNDEDLKNAKSFFGLDPQKKFHISDEVKEFYKNVIQKKKENYIKWKNMFDDFSLKYPQVSQEIIRRFQNDLPNNWKDALPKYTPKDAPGATRNLSGIVLNSINKIFPELIGGSADLSESNCTSLKEENDI…	672	0	null	no	GO_0008152	GO_0006098	GO_0008152,GO_0006098	0	0	0	0	0	0	0	0	0	0	0	0	0	0	0	0	0	0	0	0	0	0	0	0	0	0	0	0	0	0	0	0	0	0	0	0	0
2681	PF3D7_1021600	deoxyribose-phosphate aldolase, putative	DPA	ATGGCTAACTATGCAGAAACTTTTTCAGCATGGACAAGTATTTGCCTGACCGATCATACACTTTTAGGTGAAAATGACACAGAAGATGATATAAGAGAATTATGTGAGGAATCAGTTAAAACTTGTCCATTTGCAGCAGCTGTTTGCGTAAAGCCTGAATTTGTGAAATTTATAAACGACACAATAAAAAAAGAAATATGTCCATTTAAGCCGAAAGTTGCGTGTGTAATTAATTTTCCTCATGGAACTGATGTTGTTGAAAAAGTATTGGAAGATACAAAGAAGGTATTAGAGGACGGAGTTGATGAAATTGATTTAGTTATAAATTATAAAAAAGTTTTACAAAATGTTGAAGAAGGTTTAAAAGAAGCAACTGAATTAACAAAAAAAGTGAAAAAT…	MANYAETFSAWTSICLTDHTLLGENDTEDDIRELCEESVKTCPFAAAVCVKPEFVKFINDTIKKEICPFKPKVACVINFPHGTDVVEKVLEDTKKVLEDGVDEIDLVINYKKVLQNVEEGLKEATELTKKVKNLMKEKVLKVIIETGELKNDELIIKTTLAVLEGNADFVKTSSGKVPVNATPGAVKAIIEAMKQYVEKNPQKKDKIGLKVAGGVGDLNSASYYILLARRFLSALACHPNNFRIGSSSLVPKLRKIIAQNPAV	263	0	null	no	GO_0009264	GO_0006098	GO_0009264,GO_0006098	0	0	0	0	0	0	0	0	0	0	0	0	0	0	0	0	0	0	0	0	0	0	0	0	0	0	0	0	0	0	0	0	0	0	0	0	0
5119	PF3D7_1454700	6-phosphogluconate dehydrogenase, decarboxylating, putative	null	ATGTGTGATATTGGTTTGATAGGTTTGGCTGTCATGGGCCAGAATTTAAGTTTGAATATTTCAAGCAAAGGTTTTAAAATTGGTGTTTATAATAGGACATATGAAAGAACAGAAGAAACAATGAAAAGAGCAAAAGAAGAGAATTTGGTTGTTTATGGTTATAAAACAGTAGAAGAATTAATAAATAATTTGAAAAAACCAAGGAAAGTTATTTTATTAATCAAAGCAGGTCCAGCTGTAGATGAGAATATTAGTAATATATTAAAACATTTTGAAAAAGGAGATATAATAATTGATGGTGGGAATGAATGGTATATTAATTCAGAAAGAAGAATAAAATTATGTAAAGAAAAAGATGTAGAATATTTAGCTATGGGTGTGAGTGGAGGTGAAGCAGGT…	MCDIGLIGLAVMGQNLSLNISSKGFKIGVYNRTYERTEETMKRAKEENLVVYGYKTVEELINNLKKPRKVILLIKAGPAVDENISNILKHFEKGDIIIDGGNEWYINSERRIKLCKEKDVEYLAMGVSGGEAGARYGCSFMPGGSKYAYDCVKEILEKCSAQVGNSPCVTYIGPGSSGNYVKMVHNGIEYGDMQLISESYVIMKHILKYDNQKLSEVFNKWNEGILNSYLIEITANILAKKDDLTNNYLVDMILDIAGAKGTGKWTMLEATERGIPCPTMCAALDARNISVFKELRTKAESNFNKDNILIDPNEDLNDFENDLLNALYCCKIISYTQGLFLLKQVSEEMNWKLNLGEIARIWRGGCIIRAVFLDRIANAYKNNEKLELLFLDNEFSDDI…	468	0	null	no	GO_0055114, GO_0006098	GO_0006098	GO_0055114,GO_0006098,GO_0006098	0	0	0	0	0	0	0	0	0	0	0	0	0	0	0	0	0	0	0	0	0	0	0	0	0	0	0	0	0	0	0	0	0	0	0	0	0
4136	PF3D7_1325100	phosphoribosylpyrophosphate synthetase	null	ATGAGTTTCTTTGTATCAAAAAAATGTATATCAAACTGGTATAAGAAGAAGAGTAACAATTTTTTTTATGATAAAGAAGGATGGTATGGATGTAAAGTTGCTATGTTAGTTAGTACGGGAATAATTGGTGGTTATTATATAAGTAAAGAAGAGAATAGAAAAGATTTTAGGAAGGTGTGTTTACATATGAGGAATGGTTTAAAAAATAATAGATTTTTTGATAATAATATGTTATTTTTAAATAATAATAATGTATTTTGTGATATAGGAAATAAAAATAAGAATAATAATTATCATCATCCATTATGGAGATCAGAAGAAAAAAGACCTTTTGAAAAAAAAATGGAAAATGCTATATTATTTAGTGGTACGTCAAATCCATTATTAAGTAAAAATGTA…	MSFFVSKKCISNWYKKKSNNFFYDKEGWYGCKVAMLVSTGIIGGYYISKEENRKDFRKVCLHMRNGLKNNRFFDNNMLFLNNNNVFCDIGNKNKNNNYHHPLWRSEEKRPFEKKMENAILFSGTSNPLLSKNVADHLGTSLGRVNLKRFADGEVSMQFLESIRGKDVYIIQPTCPPVNENLIELLLMISTCRRASAKKITAVIPYYGYARQDRKLSSRVPISAADVARMIEAMGVDRVVAIDLHSGQIQGFFGPRVPVDNLEAQLIGLDYFTKKDLYKPVIVSPDAGGVYRARKFQDGLNHRGIGDCGIAMLIKQRTKPNEIEKMDLVGNVYDSDVIIVDDMIDTSGTLCEAAKQLKKHGARRVFAFATHGLFSGPAIDRIEKSPLEEVVVTDTVKSNK…	437	0	null	no	GO_0009165	GO_0006098, GO_0006166	GO_0009165,GO_0006098,GO_0006166	0	0	0	0	0	0	0	0	0	0	0	0	0	0	0	0	0	0	0	0	0	0	0	0	0	0	0	0	0	0	0	0	0	0	0	0	0
1327	PF3D7_0618500	malate dehydrogenase	MDH	ATGACTAAAATTGCCTTAATAGGTAGTGGTCAAATCGGAGCAATTGTTGGAGAATTGTGTTTGCTGGAAAATCTTGGAGACCTTATTTTATATGATGTAGTCCCAGGTATACCACAAGGAAAGGCTTTAGATTTAAAACATTTTAGTACCATATTAGGAGTAAATAGAAACATTCTTGGTACTAATCAGATCGAAGATATTAAGGATGCAGATATAATAGTTATTACAGCAGGTGTACAAAGAAAAGAAGGAATGACTAGAGAAGATTTGATAGGGGTCAATGGGAAAATAATGAAAAGTGTAGCTGAATCAGTTAAATTACATTGTTCCAAAGCTTTTGTTATTTGTGTTAGTAACCCACTTGATATTATGGTAAATGTTTTTCATAAGTTTAGTAAT…	MTKIALIGSGQIGAIVGELCLLENLGDLILYDVVPGIPQGKALDLKHFSTILGVNRNILGTNQIEDIKDADIIVITAGVQRKEGMTREDLIGVNGKIMKSVAESVKLHCSKAFVICVSNPLDIMVNVFHKFSNLPHEKICGMAGILDTSRYCSLIADKLKVSAEDVNAVILGGHGDLMVPLQRYTSVNGVPLSEFVKKNMISQNEIQEIIQKTRNMGAEIIKLAKASAAFAPAAAITKMIKSYLYNENNLFTCAVYLNGHYNCSNLFVGSTAKINNKGAHPVEFPLTKEEQDLYTESIASVQSNTQKAFDLIK	313	0	null	no	GO_0005975, GO_0019752, GO_0044262, GO_0055114	GO_0006099	GO_0005975,GO_0019752,GO_0044262,GO_0055114,GO_0006099	0	0	0	0	0	0	0	0	0	0	0	0	0	0	0	0	0	0	0	0	0	0	0	0	0	0	0	0	0	0	0	0	0	0	0	0	0
876	PF3D7_0504600	2-oxoisovalerate dehydrogenase subunit beta, mitochondrial, putative	BCKDHB	ATGATGAGACTATTAAGAAATAACGTAAAAAATATGTTCTTAAAAAATTGCTTTCTTGTGAGGAATACAAATGTAAAATGTTGGAGAACCGATAGGTTTCATAATTACAATATGTGGAATACTGTTGAAAATAATGGCATTCGTGGTTTTTCTTCCTCTAGTTTTGAAGAGATAAAAAAAATGAATATGTTTACAGCAATAAATTCAGCTATGCATAATGTATTTGAAAGTAACCCTAATTCTGTATTATTAGGAGAAGATGTTGCTTTCGGAGGTGTGTTTAGATGTTCTTTAGATTTATTAAAAAAATATGGAAACATGAGAGTTTTCAATACTCCCTTATGTGAACAAGGAATTATAGGATTTGCTATAGGTCTAGCTGAAAATGGATTTACAACA…	MMRLLRNNVKNMFLKNCFLVRNTNVKCWRTDRFHNYNMWNTVENNGIRGFSSSSFEEIKKMNMFTAINSAMHNVFESNPNSVLLGEDVAFGGVFRCSLDLLKKYGNMRVFNTPLCEQGIIGFAIGLAENGFTTIAEIQFGDYIFPAFDQIVNDVAKYRYRSGSSFDVGKLTIRSTWGAVGHGGLYHSQSPEAFFAHAAGIKIIVPSDAYKAKGLLLSAINDPNPCLFFEPKILYRSSVCDVPTGPYQLELGKADVVRQGSDVTIVTWGSLVHKMKNAAEILSKKHNIECEVIDLQSIIPWDIETVQKSVEKTGRLLITHEAQLTNGFGAEIAAKIQERCFYNLHTPIKRVCGYDTPFPHVYEPFYMPDAHKVIYEVKKMMK	381	0	null	no	GO_0008152	GO_0006099	GO_0008152,GO_0006099	0	0	0	0	0	0	0	0	0	0	0	0	0	0	0	0	0	0	0	0	0	0	0	0	0	0	0	0	0	0	0	0	0	0	0	0	0
2810	PF3D7_1034400	flavoprotein subunit of succinate dehydrogenase	SDHA	ATGATTAGGAATAATAAAAAATACATAAGATTTATGCAATCAAGTTTTTGTAGATTCTCAAATATTAAAACGAAAGCATATGATATAATTGATCATCATTATGATGCAGTAATTGTAGGAGCTGGAGGTGCTGGATTAAGATCTGCATTGGAATTATCAAAAAATAAATACAAGGTAGCATGTATCAGTAAATTGTTTCCAACACGATCACATACTGTAGCTGCTCAAGGTGGAATAAATGCAGCTTTAGGTAATATGACTGAAGATGATTGGAGATGGCATGCTTATGATACTATCAAAGGTTCAGATTGGCTTGGGGATCAAAACGCTATTCATTATATGTGTAGAGAAGCTCCTGATTCTGTATTAGAATTAGAAGAATTTGGACTCCCGTTTTCA…	MIRNNKKYIRFMQSSFCRFSNIKTKAYDIIDHHYDAVIVGAGGAGLRSALELSKNKYKVACISKLFPTRSHTVAAQGGINAALGNMTEDDWRWHAYDTIKGSDWLGDQNAIHYMCREAPDSVLELEEFGLPFSRTKDGKIYQRAFGGQSLKYGKGGQAYRCAAAADRTGHAMLHTLYGQSLSYNCIFFVEYFVLDLLMLNSNECIGVICINIADGKIHRFFTPHTVIATGGYGRAYLSCTSAHACTGDGNAIVARSKLPLQDLEFVQFHPTGIYPAGCLITEGCRGEGGILRNKEGEAFMMRYAPKAKDLASRDVVSRAMTIEINEQRGCGPNADHIYLDLTHLPYETLKERLPGIMETAKIFAGVDVTKQYIPVLPTVHYNMGGIPTNYKTQVLTQNV…	631	0	null	no	GO_0022900, GO_0055114, GO_0006099	GO_0006099	GO_0022900,GO_0055114,GO_0006099,GO_0006099	0	0	0	0	0	0	0	0	0	0	0	0	0	0	0	0	0	0	0	0	0	0	0	0	0	0	0	0	0	0	0	0	0	0	0	0	0
4332	PF3D7_1345700	isocitrate dehydrogenase [NADP], mitochondrial	IDH	ATGGGAAAGCATATACGAATTTTAAAAAATCAATACCTACAATTTATGTCGAAGAGATGTATTCAAAGCAAGGCGGCTTTTAACATATGCGGTAAAATTAACGTAGAAAACCCTATTGTAGAGTTAGATGGAGATGAAATGACTAGAATAATTTGGAAAGATATAAAAGAAAAATTAATCTTACCATATGTTAACTTAAAGATAAAATATTTTGATTTATCTATTGAAAATCGAGATAAGACTAATGATCAAGTTACCATAGAAGCTGCTGAAGAAATAAAAAAAACTTCAGTAGGTATAAAATGTGCAACTATAACACCTGATGCTGCAAGAGTTAAAGAATTTAATTTAAAGGAAATGTGGAAAAGTCCAAACGGTACTATAAGAAATATATTAGAT…	MGKHIRILKNQYLQFMSKRCIQSKAAFNICGKINVENPIVELDGDEMTRIIWKDIKEKLILPYVNLKIKYFDLSIENRDKTNDQVTIEAAEEIKKTSVGIKCATITPDAARVKEFNLKEMWKSPNGTIRNILDGTVFRTPILIKNIPKLVPNWKKPIVIGRHAYADQYKQKSLKIEKSGKFEIVFTPDDNSQVLRETVFHFKSPGVCLGMYNTEESIRNFALSCFQYALDLKMPVYMSTKSTILKIYDGLFKDIFDEIYEKQFKKSFEQHNLWYEHKLIDDMVAQVLKSEGGFLWACKNYDGDIQSDAVAQGYGSLGLMSSVLLCPDGVTCVSEAAHGTVTRHYRAYQKGEKTSTNPIASIFAWTKGLEHRAKLDKNDNLKQFCYALEKACIETVEDGL…	468	0	null	no	GO_0006102, GO_0055114	GO_0006102, GO_0006099	GO_0006102,GO_0055114,GO_0006102,GO_0006099	0	0	0	0	0	0	0	0	0	0	0	0	0	0	0	0	0	0	0	0	0	0	0	0	0	0	0	0	0	0	0	0	0	0	0	0	0
4092	PF3D7_1320800	dihydrolipoyllysine-residue succinyltransferase component of 2-oxoglutarate dehydrogenase complex	null	ATGACAAAGAATCTTGTATTTCGATTAAATAAATCCTTATTACATCATGTCAAAAGTTTTAATAGAACATTTTTAAACCATAAGTATAATTCAAATGCAAATATTGAAGGATCACTTAAGAGATATTTTTCCATAGAAACCATTAAAGTACCTAGACTTGGTGATTCAATCACAGAAGGTACAATAAATGAATGGAAAAAAAAAGTGGGAGATTATGTTAAGGCGGATGAAACGATAACAATTATCGATACAGATAAAGTTAGTGTTGATATAAATTCTAAAGTAAGTGGAGGGTTATCCAAAATTTTTGCGGATGTAGGAGATGTTGTTTTGGTAGATGCACCTTTATGTGAAATTGATACATCTGTAGAACCACCTGAAGATATTTGTAAAACTAAA…	MTKNLVFRLNKSLLHHVKSFNRTFLNHKYNSNANIEGSLKRYFSIETIKVPRLGDSITEGTINEWKKKVGDYVKADETITIIDTDKVSVDINSKVSGGLSKIFADVGDVVLVDAPLCEIDTSVEPPEDICKTKEEVGESKNNENNYTFNQLNRDIKDEAHIKDEVSKNEKDIFVKDPICFGNDYESINERTERRVRMLPIRKRIAERLKESQNTCALLTTFNECDMSKAMLLRSELNDIFQKKYSCKLGFVSLFMYASTLALKKMPNVNAYIENDEIVYKNYIDISVAVATPNGLTVPVIRNCQNKNLPQLELALSDLATKARSNKLSIDDFSGGTFTISNGGVFGSMLSTPIINMPQSAILGMHTIKNRPVVVNNEIVIRPIMYLALTYDHRLLDGRE…	421	0	null	no	GO_0008152, GO_0006099	GO_0006103	GO_0008152,GO_0006099,GO_0006103	0	0	0	0	0	0	0	0	0	0	0	0	0	0	0	0	0	0	0	0	0	0	0	0	0	0	0	0	0	0	0	0	0	0	0	0	0
1960	PF3D7_0820700	2-oxoglutarate dehydrogenase E1 component	KDH	ATGAGAAAATTTTTTTACACAAATAATTTGGTAAGAAATAATGGAAAAGATATAAGAACACGATCATTTCATTTAAGTTCTTGCTTATATGATTATAATTTTAACCCAAGTATGACCTCGTATATTGAGAATACATATAAGATATGGAAAGAAGACAGAAACAATTTACACAAATCGTGGGACTCTTTATTTAGCATGTATCCACATGCAGAAATGGATAATTATAATAACCCAATAAAAATAAATCGAAAGACTGATAATTATAATAATAGTAATTGTTTTCAAGATGTGCTTAAGAATAATAATCTTCGAATTACATATGTGAATAATGAAATGCTTGAAAAAGGGAAAACAGAAAATATTTATGATCTAGCTAGGATTGTTCAATTAATTAGATGG…	MRKFFYTNNLVRNNGKDIRTRSFHLSSCLYDYNFNPSMTSYIENTYKIWKEDRNNLHKSWDSLFSMYPHAEMDNYNNPIKINRKTDNYNNSNCFQDVLKNNNLRITYVNNEMLEKGKTENIYDLARIVQLIRWYQKKGHLYANINPLPLPKEPPYSSVCYEPCKRKMSYVDFGFNEDDLDKEFFFDLPSISGFSSNGMKKCNLRNLLKRLEETYCGTIGFEYMHITNENIVNYIIQRIEKDKKYEYDTKMKKRILEYTARAFIFENYMAAKFATTKRFGVDGCETLITGMKALIKRAAQLDVDSVLMSMSHRGRLNVLFNVLHKPLEQMMSEFRGKTGFSDNIWGNTGDVKYHLGVEIDYYDEDSQRYIHMGIVDNSSHLESVDPILMGQARAQQYYCN…	1038	0	null	no	GO_0008152, GO_0055114, GO_0006099	GO_0006103, GO_0006099	GO_0008152,GO_0055114,GO_0006099,GO_0006103,GO_0006099	0	0	0	0	0	0	0	0	0	0	0	0	0	0	0	0	0	0	0	0	0	0	0	0	0	0	0	0	0	0	0	0	0	0	0	0	0
2949	PF3D7_1108500	succinyl-CoA synthetase alpha subunit, putative	null	ATGAAATATTCTAATATGAAAAAGTTATCTTTTCCCTTGAAGGAAAGATATTTCTCAGCAACCAGTAAAGTGTTCATAGATAAAAATACAACAGTAATATGTCAAGGAATTACTGGAAAACAGGGTACTTTCCATACAACCGAAGCCTTAAAGTATGGAACAAAAATGGTAGGTGGAGTAAACCCAAGGAAGAAAGGCACAACATGGACCAGTTATGATAATAAATACACCTTACCTGTTTTTGGTACAATTCTTGAAGCAAAAGAAAACACGAATTGTTATGCATCCGTTTTATATGTCCCCCCAGAGCATGCAAAGAGTGCAATGATTGAATCAATTGAAGCTGAAATTCCATTAATTGTATGTATAACTGAAGGAATATGCCAGCATGATATGCTT…	MKYSNMKKLSFPLKERYFSATSKVFIDKNTTVICQGITGKQGTFHTTEALKYGTKMVGGVNPRKKGTTWTSYDNKYTLPVFGTILEAKENTNCYASVLYVPPEHAKSAMIESIEAEIPLIVCITEGICQHDMLEVKSCLKMSKKTTLIGPNCPGIIKPGECKIGIMPSHIHKKGCVGIVSRSGTLTYEGVNQTTKVGLGQSTCIGIGGDPFHGTNFLDCIKLFLEDDQTECILLIGEIGGDSEEQVAQWLIQNNVDNGKRKKKPVFAFIAGKCAPPGKRMGHAGALISGGKGTADGKIEALQNAGVHVILNPTKMGEDIYAVMQTLK	327	0	null	no	GO_0008152	GO_0006104, GO_0006099	GO_0008152,GO_0006104,GO_0006099	0	0	0	0	0	0	0	0	0	0	0	0	0	0	0	0	0	0	0	0	0	0	0	0	0	0	0	0	0	0	0	0	0	0	0	0	0
4890	PF3D7_1431600	succinyl-CoA ligase [ADP-forming] subunit beta, putative	null	ATGGCCCGTTTTAAGAGCCAATTTAATTTCATGCTAAAGTTTAAGAGACATATTGGTAATAAGATAATATGGGGGAGAACAAATAATTTTTTTTATAAAAAGGAATATATTTTTTCTTCATTTAGAAATAATATTGGAAAGAGATACTTAAGTATTCATGAATATTTATCAGTAGATTTATTACGTTCCCATAATGTACCTTGTCCTGAAGGGTATGCAGCGAAAACAGCAGAAGAAGCAGAAGAGAAAGCTTTATTATTACAAAACGTTTGTGGTGATAATGATTTAGTAATAAAAGCTCAAGTATTAAGTGGTGGGAGGGGTGTTGGTTATTTTAAGGAAAATAATTTTGAAGGAGGAGTTCATGTGTGTCGAAATAGTATGGAAGTAAAAGAAATA…	MARFKSQFNFMLKFKRHIGNKIIWGRTNNFFYKKEYIFSSFRNNIGKRYLSIHEYLSVDLLRSHNVPCPEGYAAKTAEEAEEKALLLQNVCGDNDLVIKAQVLSGGRGVGYFKENNFEGGVHVCRNSMEVKEIATKMLNNTLITKQSGPEGKKCNTVFICERFYIRKERYIAFLLDRNSDGIILLGSSIGGSSIEDIIKKNPDAIYKLNIDINNGLTTGQAREFSENIGFKNDQLNIVTDMIVNLYKVFKKYDCTLLEINPLSELNDGRVLCCDAKLNFDDNAEYRQKNIFEKRDLTQENKEELLAKKYNLNYVSLNGNIACMVNGAGLAMATLDLIILHKGNPSNFLDVGGGATEEEITEALKIINNNENAKICFINILGGIMRCDIIANGIINAFKQ…	462	0	null	no	GO_0008152	GO_0006104, GO_0006099	GO_0008152,GO_0006104,GO_0006099	0	0	0	0	0	0	0	0	0	0	0	0	0	0	0	0	0	0	0	0	0	0	0	0	0	0	0	0	0	0	0	0	0	0	0	0	0
4841	PF3D7_1426900	cytochrome b-c1 complex subunit 6, putative	QCR6	ATGTCATATCCATACTATACAGAATTTTTTGTCCGATATCCAAAATTTAAAGAAAGGGATGAAAAAGATCGAACTGTTGATCCAAGAATAGAATTAGAGAAAAAATGTGCAGTCAAATGTGTAAGACCAGTTAATGAATATCAAAATTGTGTTAGTAGAGTGAGGGCAAGAACAGATAATAAGGGAAATTGTTTGGGTCAATATGAAGAACTGTATATTTGTATTGATCATTGTGTAGCGAAGGATTTGTTTAATTATTTAGCCTAG	MSYPYYTEFFVRYPKFKERDEKDRTVDPRIELEKKCAVKCVRPVNEYQNCVSRVRARTDNKGNCLGQYEELYICIDHCVAKDLFNYLA	88	0	null	no	GO_0006122	GO_0006122	GO_0006122,GO_0006122	0	0	0	0	0	0	0	0	0	0	0	0	0	0	0	0	0	0	0	0	0	0	0	0	0	0	0	0	0	0	0	0	0	0	0	0	0
4967	PF3D7_1439400	cytochrome b-c1 complex subunit Rieske, putative	null	ATGAATAATATTAAATATGTGGAACTTTTTTACAAATGCAAAATATTTCGAAAAAATGGATTGAATAGAATAATTAGAAGAAATGGTGGTACATTTAATCATAACATAAAAGAAAATGAACGTATTCCTCCTGCATCTGAAGATCCAAGTTATAAAAATTTATTTGATCATGCAGAAGATATAAAATTATGGGAAATTGAAGAAAAACAAAATGTGTCTCATAAAAAAGTTGAAGATTTATCAGAATTAGTTGAACCGTCAAATCATCCACATCAATATGAAGGTATTTTTGCAAGAACAAGATATGCTCATTATAATCAAACAGCTGAGCCTGTATTTCCAAGAAAACCGGATCTAGAGAAAGGTGAATTGGCTAGCGGAGCAAATGTAACAAGAACT…	MNNIKYVELFYKCKIFRKNGLNRIIRRNGGTFNHNIKENERIPPASEDPSYKNLFDHAEDIKLWEIEEKQNVSHKKVEDLSELVEPSNHPHQYEGIFARTRYAHYNQTAEPVFPRKPDLEKGELASGANVTRTDVWHNPKEPAIVSIGKFEPRNFRPAGYAENCPNPESINSDHHPDFREYRLRSGNEDRRSFMYFISASYFFIMSSIMRSAICKSVHFFWISKDLVAGGTTELDMRTVNPGEHVVIKWRGKPVFVKHRTPEDIQRAKEDDKLIQTMRDPQLDSDRTIKPEWLVNIGICTHLGCVPAQGGNYSGYFCPCHGSHYDNSGRIRQGPAPSNLEVPPYEFVDENTIKIG	355	0	null	no	GO_0055114	GO_0006122	GO_0055114,GO_0006122	0	0	0	0	0	0	0	0	0	0	0	0	0	0	0	0	0	0	0	0	0	0	0	0	0	0	0	0	0	0	0	0	0	0	0	0	0
417	PF3D7_0306400	FAD-dependent glycerol-3-phosphate dehydrogenase, putative	null	ATGATTAAAAAAGTTGCTATTTGTAGTGGGACCTTGGGTATTTTATCCTATGGAGGGTTTTATTTTTTAAAAATAAATTTTCAAAAGAATATGATAGATAAAGATGTGACATATAAATATAGTCCTTGTATAAAAAGAAACGAAATGATTAAGAAGCTACAAGAAAATCAATATGATTTATTAATAATAGGAGGAGGTGCTACAGGTGCTGGTTTGGCCTTAGATGCAGCCACAAGAGGATTAAAATGTGCGCTAGTAGAAAAGAATGATTTTTCAAGTGGTACATCTTCTAAGTCTACCAAATTATTACATGGTGGTATAAGATATTTAGAAAATGCAGTAAATAATTTAGATTTTACAGAATTATATTTTGTATGGGAAGCATTAGCAGAAAGAGCG…	MIKKVAICSGTLGILSYGGFYFLKINFQKNMIDKDVTYKYSPCIKRNEMIKKLQENQYDLLIIGGGATGAGLALDAATRGLKCALVEKNDFSSGTSSKSTKLLHGGIRYLENAVNNLDFTELYFVWEALAERAHTMKIAPYLSRPVSILMPIYKYWQVPYFSYNIKIYDLLADLVCYFDKGVPNSLYIRKSNTIDNFPLLRKDKLKGSLIYFDGQHDDSRMNLNLILTSAIDNYVPGQIGATVCNHMEVKNFIKDENNKLVGVRAIDKINDKEIEIFSKVIINATGPYGDIIRKLADENRKPMIQVSVGCHFILPKWYSTKNNGMIIPKTSDDRVLFLLPWENNTLVGTTDEKRIMQDDPKIQEKDIEFLTNELSKYIHVSAEEIKNDITAAWCGFRPL…	653	1	null	no	GO_0006072, GO_0055114	GO_0006127	GO_0006072,GO_0055114,GO_0006127	0	0	0	0	0	0	0	0	0	0	0	0	0	0	0	0	0	0	0	0	0	0	0	0	0	0	0	0	0	0	0	0	0	0	0	0	0
960	PF3D7_0513300	purine nucleoside phosphorylase	PNP	ATGGATAATCTTTTACGCCATTTAAAAATAAGCAAGGAACAAATAACACCAGTTGTTTTAGTTGTAGGAGATCCAGGAAGAGTCGACAAGATAAAAGTGGTATGTGATTCATATGTTGATTTAGCATACAACAGAGAATACAAAAGTGTAGAATGTCATTATAAGGGTCAGAAATTTTTATGTGTTAGTCACGGTGTAGGTTCAGCAGGATGTGCTGTATGTTTTGAAGAATTATGTCAAAATGGAGCTAAAGTAATTATTCGTGCAGGTTCATGTGGATCTCTTCAACCAGATTTAATAAAAAGAGGTGACATATGTATATGTAATGCAGCTGTTAGGGAAGATAGAGTATCTCATTTATTAATTCATGGAGATTTCCCAGCTGTTGGTGATTTTGAT…	MDNLLRHLKISKEQITPVVLVVGDPGRVDKIKVVCDSYVDLAYNREYKSVECHYKGQKFLCVSHGVGSAGCAVCFEELCQNGAKVIIRAGSCGSLQPDLIKRGDICICNAAVREDRVSHLLIHGDFPAVGDFDVYDTLNKCAQELNVPVFNGISVSSDMYYPNKIIPSRLEDYSKANAAVVEMELATLMVIGTLRKVKTGGILIVDGCPFKWDEGDFDNNLVPHQLENMIKIALGACAKLATKYA	245	0	null	no	GO_0009116	GO_0006148, GO_0006152, GO_0042493	GO_0009116,GO_0006148,GO_0006152,GO_0042493	0	0	0	0	0	0	0	0	0	0	0	0	0	0	0	0	0	0	0	0	0	0	0	0	0	0	0	0	0	0	0	0	0	0	0	0	0
199	PF3D7_0206700	adenylosuccinate lyase	ADSL	ATGGATGTACATGTGAACCAACTGAAAAACATATCGCCCATCGACGGGAGATACAAAAGATCGTGCCAGGAAGTAAGCGAATATTTTTCAGAGTACGCTTTAATAAAATATCGAATAATAGTTGAAATAAAATGGTTATTATTTTTAAATGACAAAGAATATTTCTTTCCAAAAGTTAGTGAGAAGAGTTTGAGTAATATCACATCGATTATGGAATTAATAAATGATAATGATATATTACGTGTAAAAAAGATAGAAGAAGAAACGAATCATGATGTTAAGGCGGTTGAATATTTTATAAGAGAGAAATTAGAAAGTTTAAAAAATGAAGAAATAACAAAAGTAATACCATATGTACATTATTTATGTACCAGTGAAGATATTAATAATATAGCATAT…	MDVHVNQLKNISPIDGRYKRSCQEVSEYFSEYALIKYRIIVEIKWLLFLNDKEYFFPKVSEKSLSNITSIMELINDNDILRVKKIEEETNHDVKAVEYFIREKLESLKNEEITKVIPYVHYLCTSEDINNIAYGLCLYNCIHNIIIPNIQNIIDKLKEFSFNYSDVSLLSKTHGQPASPTTFGKEMSNYYYRLYKHINKLKNIEIYVKFNGAVGNFNAHKVCDPNIDWIDNIKYFIETYFNLHFSLYCTQIQDHDYICEISDTLARLNYTLIDLSVDMWLYISSNVLKLKVIQKEIGSSTMPHKVNPIDFENAEGNLHLANSLFKLFSSKLPISRLQRDLSDSTVLRNLGSSFAYSLISYKSLLRGLNKIDVDQNVMNEQLNQNWCTLAEPIQIIMKKY…	471	0	null	no	GO_0006188, GO_0009152	GO_0006163	GO_0006188,GO_0009152,GO_0006163	0	0	0	0	0	0	0	0	0	0	0	0	0	0	0	0	0	0	0	0	0	0	0	0	0	0	0	0	0	0	0	0	0	0	0	0	0
2586	PF3D7_1012600	GMP synthase [glutamine-hydrolyzing]	GMPS	ATGGAAGGAGAGGAATATGACAAGATTTTGGTATTGAATTTCGGTTCTCAATACTTCCATTTGATTGTAAAAAGATTAAACAATATAAAAATATTTAGTGAAACTAAAGATTATGGTGTTGAATTAAAAGATATTAAGGATATGAATATAAAAGGTGTTATATTATCTGGTGGTCCATATTCAGTAACAGAGGCTGGTTCTCCACATTTAAAGAAAGAAGTGTTTGAATATTTTTTAGAAAAGAAGATTCCAATTTTTGGTATATGTTATGGTATGCAAGAGATAGCAGTACAGATGAATGGTGAGGTTAAGAAATCTAAGACATCCGAATATGGATGTACTGATGTAAACATATTAAGAAATGATAATATTAATAATATAACATATTGTAGAAATTTT…	MEGEEYDKILVLNFGSQYFHLIVKRLNNIKIFSETKDYGVELKDIKDMNIKGVILSGGPYSVTEAGSPHLKKEVFEYFLEKKIPIFGICYGMQEIAVQMNGEVKKSKTSEYGCTDVNILRNDNINNITYCRNFGDSSSAMDLYSNYKLMNETCCLFENIKSDITTVWMNHNDEVTKIPENFYLVSSSENCLICSIYNKEYNIYGVQYHPEVYESLDGELMFYNFAYNICKCKKQFDPIRYHELELKNIEKYKHDHYVIAAMSGGIDSTVAAAYTHKIFKERFFGIFIDNGLLRKNEAENVYTFLKSTFPDMNITKIDASENFLSNLQGVTDPEQKRKIIGKLFIEEFEKAVNNIDIDINKTFLLQGTLYPDIIESKCSKNLSDTIKTHHNVGGLPKNLK…	555	0	null	no	GO_0006177, GO_0006164	GO_0006164	GO_0006177,GO_0006164,GO_0006164	0	0	0	0	0	0	0	0	0	0	0	0	0	0	0	0	0	0	0	0	0	0	0	0	0	0	0	0	0	0	0	0	0	0	0	0	0
2584	PF3D7_1012400	hypoxanthine-guanine phosphoribosyltransferase	HGPRT	ATGCCAATACCAAATAATCCAGGAGCTGGTGAAAATGCCTTTGATCCCGTTTTCGTAAAGGATGACGATGGTTATGACCTTGATTCTTTTATGATCCCTGCACATTATAAAAAATATCTTACCAAGGTCTTAGTTCCAAATGGTGTCATAAAAAACCGTATTGAGAAATTGGCTTATGATATTAAAAAGGTGTACAACAATGAAGAGTTTCATATTCTTTGTTTGTTGAAAGGTTCTCGTGGTTTTTTCACTGCTCTCTTAAAGCATTTAAGTAGAATACATAATTATAGTGCCGTTGAGACGTCCAAACCATTATTTGGAGAACACTACGTACGTGTGAAATCCTATTGTAATGACCAATCAACAGGTACATTAGAAATTGTAAGTGAAGATTTATCT…	MPIPNNPGAGENAFDPVFVKDDDGYDLDSFMIPAHYKKYLTKVLVPNGVIKNRIEKLAYDIKKVYNNEEFHILCLLKGSRGFFTALLKHLSRIHNYSAVETSKPLFGEHYVRVKSYCNDQSTGTLEIVSEDLSCLKGKHVLIVEDIIDTGKTLVKFCEYLKKFEIKTVAIACLFIKRTPLWNGFKADFVGFSIPDHFVVGYSLDYNEIFRDLDHCCLVNDEGKKKYKATSL	231	0	null	no	GO_0009116, GO_0006166	GO_0006166	GO_0009116,GO_0006166,GO_0006166	0	0	0	0	0	0	0	0	0	0	0	0	0	0	0	0	0	0	0	0	0	0	0	0	0	0	0	0	0	0	0	0	0	0	0	0	0
4419	PF3D7_1354500	adenylosuccinate synthetase	ADSS	ATGAACATATTTGATCATCAAATAAAAAATGTGGATAAAGGGAATGTAGTTGCAATATTAGGTGCACAATGGGGTGATGAAGGGAAAGGAAAAATAATTGATATGTTATCAGAATATTCTGATATTACTTGTAGATTTAATGGAGGTGCTAATGCAGGACATACGATATCAGTAAATGATAAGAAATATGCTTTACATTTATTACCATGTGGTGTATTATATGATAATAATATAAGTGTATTAGGAAACGGAATGGTAATACATGTAAAATCATTAATGGAAGAAATTGAATCAGTTGGGGGAAAGTTGTTAGATAGATTATATTTATCAAATAAAGCACATATATTATTTGATATTCATCAAATTATTGATTCAATCCAAGAAACGAAAAAATTAAAA…	MNIFDHQIKNVDKGNVVAILGAQWGDEGKGKIIDMLSEYSDITCRFNGGANAGHTISVNDKKYALHLLPCGVLYDNNISVLGNGMVIHVKSLMEEIESVGGKLLDRLYLSNKAHILFDIHQIIDSIQETKKLKEGKQIGTTKRGIGPCYSTKASRIGIRLGTLKNFENFKNMYSKLIDHLMDLYNITEYDKEKELNLFYNYHLKLRDRIVDVISFMNTNLENNKKVLIEGANAAMLDIDFGTYPYVTSSCTTVGGVFSGLGIHHKKLNLVVGVVKSYLTRVGCGPFLTELNNDVGQYLREKGHEYGTTTKRPRRCGWLDIPMLLYVKCINSIDMINLTKLDVLSGLEEILLCVNFKNKKTGELLEKGCYPVEEEISEEYEPVYEKFSGWKEDISTCNEF…	442	0	null	no	GO_0006164	GO_0006167, GO_0006164	GO_0006164,GO_0006167,GO_0006164	0	0	0	0	0	0	0	0	0	0	0	0	0	0	0	0	0	0	0	0	0	0	0	0	0	0	0	0	0	0	0	0	0	0	0	0	0
4629	PF3D7_1404600	adenylyl cyclase alpha	ACalpha	ATGCCAGAACCAAAACAAATATATGCAAATAATATTTTTGATAATGATAAGTTGAAAAGATTTTTCTTAAAATATAGATCAAAAGAAAAAGTATTATATTCCTTTACATCAGAAAATGACATCATAAATGAAGAGAAGAGAAAAAGCAAAAATAACTTGTGCATGTTAAAATATAAAAATATATGTCTTAATATACATACAAGCAAATTTTTCAAATACTCCAAATGGAAATATGATTTTATATCAGATATTTTTATTTCCATTCTCTTATTTGGATGTCTTATCGAAATAATTTTTAATTTTTTAATGGATTCAACATATATCTTTTATTTTATGTTTTTTGATATTATATCGTTCATGCTGTTATTCTTTGATATCTTTCTTTTCGAAAAATATTTT…	MPEPKQIYANNIFDNDKLKRFFLKYRSKEKVLYSFTSENDIINEEKRKSKNNLCMLKYKNICLNIHTSKFFKYSKWKYDFISDIFISILLFGCLIEIIFNFLMDSTYIFYFMFFDIISFMLLFFDIFLFEKYFFDFFIYFTNSLYTWKKIDKDNIIYLIQLFKSLRIIKIYRFVINFIKKHTKEKYKHRNEWNFEKMESMKNRPLKESLKFTNKMHLALIKRYFMSLIFIMLSYIMIEIIYISKESKSPMNYFIYNLDLIVFDEFYETEFLKALYFYSAIQKNKRDEEYLISIKSKRKLKNFINKKEIDISGINYLLWDFTNLSHNDLLKFVTPSSANQNVEEEIILDHTIKNINELRYFETKIYESKDFIFHINIKRYIERTIKNIIILKIFIIIFSF…	865	4	null	no	GO_0009190, GO_0035556	GO_0006171	GO_0009190,GO_0035556,GO_0006171	0	0	0	0	0	0	0	0	0	0	0	0	0	0	0	0	0	0	0	0	0	0	0	0	0	0	0	0	0	0	0	0	0	0	0	0	0
3245	PF3D7_1138400	guanylyl cyclase	GCalpha	ATGTCAGATAGTAAAAAGCATTACAACGAATCTAATGTACGATATAAAGTGAAATATTCAGGAAAAATATTTGGTAATAATATGAAAAAATTAAATGAAAATAATAATCATGATTTTACAACTGCTGAAGCAGCATGGATGGAAAAGAAAAAGAAATTATATAAAGATACAAATAATCAACCTTTATGGGATTTTCGAAAAATTCAAATAAATCCAACAGAAACTGATGAATTAATTAGTTTTCCATCAAATAAAATATGCTCAAAAAATTACGGAAAATATTCATTTATATTTAAAGGATTATATGAACAATTTTTGAGATTACCAAATATATGGTTTTTATTAATTTCCTTATTAGAATTTATCCCACAATATCAAAATTTGAGTAATTATATGTAT…	MSDSKKHYNESNVRYKVKYSGKIFGNNMKKLNENNNHDFTTAEAAWMEKKKKLYKDTNNQPLWDFRKIQINPTETDELISFPSNKICSKNYGKYSFIFKGLYEQFLRLPNIWFLLISLLEFIPQYQNLSNYMYYSKHSSFFLLLFFICVSIIKNIYEDSRRSNIDYQINNRLCHMLDGPNSQLKAVRWMELSVGSIIRLIENEQVPADILLLSCNNSEGVVYIETSLLNGETNLNKKYCVNETRNETSIYAISNIRGRIVCEKPNSNMESFNGSLKLDAHPRATSLSINNVIFKGSHIKNTEYIFGVILYTGNDTKIMKNISNNKHKLGYVNKELNSYTIIGLIFTFICVFISVLFKWTEDDKFRNGSHFFLITVKDNICESIVKYTLLYSNIIPISIL…	4226	19	null	no	GO_0009190, GO_0035556	GO_0006182, GO_0007165	GO_0009190,GO_0035556,GO_0006182,GO_0007165	0	0	0	0	0	0	0	0	0	0	0	0	0	0	0	0	0	0	0	0	0	0	0	0	0	0	0	0	0	0	0	0	0	0	0	0	0
2372	PF3D7_0928900	guanylate kinase	GK	ATGAATAATATTTATCCCCTGGTTATTTGTGGTCCTTCGGGTGTTGGTAAAGGTACCTTGATAAAAAAGCTGTTGAATGAATTTCCAAATTATTTTTATTTTTCCGTAAGCTGTACGACAAGAAAAAAGAGAGAGAAAGAAAAAGAAGGTGTAGATTATTATTTCATAGATAAGACTATATTTGAAGATAAATTAAAAAATGAAGATTTTTTAGAATATGATAATTATGCTAATAATTTTTATGGAACATTAAAAAGTGAATATGATAAAGCAAAAGAACAAAATAAAATCTGCTTATTTGAAATGAATATTAATGGTGTCAAACAATTGAAAAAATCAACACATATAAAAAATGCTCTCTATATATTTATTAAACCACCAAGTACTGATGTACTCTTA…	MNNIYPLVICGPSGVGKGTLIKKLLNEFPNYFYFSVSCTTRKKREKEKEGVDYYFIDKTIFEDKLKNEDFLEYDNYANNFYGTLKSEYDKAKEQNKICLFEMNINGVKQLKKSTHIKNALYIFIKPPSTDVLLSRLLTRNTENQEQIQKRMEQLNIELHEANLLNFNLSIINDDLTLTYQQLKNYLLNSYIHLNNHTRN	199	0	null	no	GO_0006163	GO_0006186, GO_0016310	GO_0006163,GO_0006186,GO_0016310	0	0	0	0	0	0	0	0	0	0	0	0	0	0	0	0	0	0	0	0	0	0	0	0	0	0	0	0	0	0	0	0	0	0	0	0	0
4688	PF3D7_1410200	cytidine triphosphate synthetase	null	ATGGATAGTGTAGATGATGAAAAACCTATAATAAAATACATCATTGTGACCGGAGGTAATATGAGTGGACTTGGTAAAGGAACAGCTATGAGTAGTATGGCTGTATTATTGTTAACAAAAAACATTTTATTAACAACAATAAAGATTGATCCATATTTAAACATTGATGCAGGAACGATGTCTCCATATGAACATGGAGAAGTTTATGTATTAGAAGATGGGGGTGAAGTTGATTTAGATTTAGGAAATTATGAGCGATTTTTAAATATAAGATTAACTTACAAGAATAATATTACATCAGGAAAAATATATGAAGAAGTTATAAAAAAAGAACGAAAAGGTGAATACTTAGGTAAAACGGTACAAGTAGTACCACATGTAACGGATGCTATCCAAAAA…	MDSVDDEKPIIKYIIVTGGNMSGLGKGTAMSSMAVLLLTKNILLTTIKIDPYLNIDAGTMSPYEHGEVYVLEDGGEVDLDLGNYERFLNIRLTYKNNITSGKIYEEVIKKERKGEYLGKTVQVVPHVTDAIQKWIKDVIDENIKKMKKEYNIDSFNKIPCMCLIEVGGTVGDIESAVYLEALQQLINNLNNDDVCLCHLSYVPIIGNLREQKTKPTQHSVKILREAGLKPDFIFCRCEEPLTQEAIKKIALFSQVKNEHVISLHDTSNVYKVPLILDKQNVCMNVLKKLNLENVVLNNKLQISPYSFNIWKQLADRYESSSEQVVIGIVGKYTASNDTYLSIISSLVHACLECGFKLVIKYINSSHLSLKQKKQKKNMDWKKKARKYSYENFHENSSTE…	858	0	null	no	GO_0006221	GO_0006206	GO_0006221,GO_0006206	0	0	0	0	0	0	0	0	0	0	0	0	0	0	0	0	0	0	0	0	0	0	0	0	0	0	0	0	0	0	0	0	0	0	0	0	0
2697	PF3D7_1023200	orotidine 5'-phosphate decarboxylase	OMPDC	ATGGGTTTTAAGGTAAAATTAGAAAAACGAAGGAATGCAATAAACACGTGTTTATGTATTGGGCTTGATCCTGATGAGAAGGATATTGAGAACTTTATGAAGAATGAGAAAGAAAATAATTATAATAATATAAAGAAAAATTTGAAAGAGAAGTATATAAATAATGTATCTATAAAGAAGGATATTTTATTGAAAGCACCTGATAATATTATAAGAGAAGAAAAAAGTGAGGAATTCTTTTACTTTTTTAATCATTTTTGTTTTTATATAATTAATGAAACGAATAAATATGCCTTAACGTTTAAGATGAATTTTGCTTTTTATATTCCTTATGGATCAGTAGGTATAGATGTATTAAAGAATGTGTTTGATTATTTATATGAATTAAATATTCCAACA…	MGFKVKLEKRRNAINTCLCIGLDPDEKDIENFMKNEKENNYNNIKKNLKEKYINNVSIKKDILLKAPDNIIREEKSEEFFYFFNHFCFYIINETNKYALTFKMNFAFYIPYGSVGIDVLKNVFDYLYELNIPTILDMKINDIGNTVKNYRKFIFEYLKSDSCTVNIYMGTNMLKDICYDEEKNKYYSAFVLVKTTNPDSAIFQKNLSLDNKQAYVIMAQEALNMSSYLNLEQNNEFIGFVVGANSYDEMNYIRTYFPNCYILSPGIGAQNGDLHKTLTNGYHKSYEKILINIGRAITKNPYPQKAAQMYYDQINAILKQNMES	323	0	null	no	GO_0006207, GO_0008152, GO_0006221	GO_0006207	GO_0006207,GO_0008152,GO_0006221,GO_0006207	0	0	0	0	0	0	0	0	0	0	0	0	0	0	0	0	0	0	0	0	0	0	0	0	0	0	0	0	0	0	0	0	0	0	0	0	0
5302	PF3D7_1472900	dihydroorotase, putative	null	ATGAAAAATTACTTTTATATTCCAATAGCTGATGACATGCACTGTCACTTAAGGCAAGGCGACATGCTGGATTTTACGGTAAATTCCATTAGAAGAGGCGGCTGTAATCGTGTTTTAGTGATGCCGAACACGCATCCTATTATAAGTACTTGTAGTGATGCACAAAAATATTTATATCAACTGAAAAGTCGTGATGATGATATAGAATATTTAATGACCTTGTATTTGAATAAGAATACGGATGAAAACGATATATTAAGTAATTACTATAAGTGTAATTTACAAGGCGTAAAAATATATCCTAGTAATGTAACCACTAATTCGAGTGATGGTATTACTAGCCTAGAACCTTATTATAAGGTATTTCATGCACTAGAAAAATTAAATAAGAGTATACAT…	MKNYFYIPIADDMHCHLRQGDMLDFTVNSIRRGGCNRVLVMPNTHPIISTCSDAQKYLYQLKSRDDDIEYLMTLYLNKNTDENDILSNYYKCNLQGVKIYPSNVTTNSSDGITSLEPYYKVFHALEKLNKSIHIHCEEPNINPLYAEEKYLPHIHDLAIKFPGLNIVLEHISSSESINVIKEFRNVAGSITPHHLYLTIDDVVNMDIYDHAIDNTYIEKYIKNTYHYCKPLPKLLEDKIALQDVIKDDFPRVFLGSDSAPHYKVMKRKPYYKPGIYTQPFLINYVAHILNKFDALDKMENFTSKNASLFLNLAEKKKLAKYYICVEKHPFKLPREYNGVVPFLAGKTLDYDIHYVSKF	358	0	null	no	GO_0008152, GO_0019856	GO_0006207	GO_0008152,GO_0019856,GO_0006207	0	0	0	0	0	0	0	0	0	0	0	0	0	0	0	0	0	0	0	0	0	0	0	0	0	0	0	0	0	0	0	0	0	0	0	0	0
3965	PF3D7_1308200	carbamoyl phosphate synthetase	cpsSII	ATGACTTCAGAATTTTGGCCAGATTTAGATTTTAAAACAGTTGGGAGGTTAATTCTTGAAGATGGTAACGAATTTGTAGGGTACAGTGTAGGTTACGAAGGGTGTAAAGGAAATAATAGTATATCATGTCATAAGGAGTATAGAAATATTATTAATAATGATAATAGCAAGAATAGTAATAATTCATTTTGTAATAATGAAGAAAACAATTTGAAAGATGATTTATTATATAAAAATAGTCGATTAGAAAATGAAGATTTTATTGTTACAGGTGAAGTTATATTTAATACAGCTATGGTTGGATATCCTGAAGCTTTAACGGACCCAAGTTATTTTGGTCAAATATTAGTTTTAACATTTCCTTCTATTGGTAATTATGGTATTGAAAAAGTAAAACAT…	MTSEFWPDLDFKTVGRLILEDGNEFVGYSVGYEGCKGNNSISCHKEYRNIINNDNSKNSNNSFCNNEENNLKDDLLYKNSRLENEDFIVTGEVIFNTAMVGYPEALTDPSYFGQILVLTFPSIGNYGIEKVKHDETFGLVQNFESNKIQVQGLVICEYSKQSYHYNSYITLSEWLKIYKIPCIGGIDTRALTKLLREKGSMLGKIVIYKNRQHINKLYKEINLFDPGNIDTLKYVCNHFIRVIKLNNITYNYKNKEEFNYTNEMITNDSSMEDHDNEINGSISNFNNCPSISSFDKSESKNVINHTLLRDKMNLITSSEEYLKDLHNCNFSNSSDKNDSFFKLYGICEYDKYLIDLEENASFHYNNVDEYGYYDVNKNTNILSNNKIEQNNNNENNKNN…	2375	0	null	no	GO_0008152, GO_0006807	GO_0006207, GO_0006538	GO_0008152,GO_0006807,GO_0006207,GO_0006538	0	0	0	0	0	0	0	0	0	0	0	0	0	0	0	0	0	0	0	0	0	0	0	0	0	0	0	0	0	0	0	0	0	0	0	0	0
1174	PF3D7_0603300	dihydroorotate dehydrogenase	DHODH	ATGATCTCTAAATTGAAACCTCAATTTATGTTTTTACCAAAGAAACATATTTTAAGTTATTGTAGAAAGGATGTTTTAAATTTGTTTGAACAGAAGTTTTATTATACTAGCAAACGGAAAGAAAGTAATAATATGAAGAATGAATCTTTATTAAGATTAATTAATTATAATAGATATTATAATAAGATAGATTCTAATAATTATTATAATGGTGGAAAAATATTAAGTAATGATAGGCAATATATATATTCACCATTATGTGAATATAAAAAGAAAATAAATGATATATCATCATATGTATCTGTACCTTTTAAGATTAATATAAGAAATTTAGGTACTTCCAATTTTGTAAATAATAAGAAGGATGTACTTGATAATGATTATATTTATGAAAATATT…	MISKLKPQFMFLPKKHILSYCRKDVLNLFEQKFYYTSKRKESNNMKNESLLRLINYNRYYNKIDSNNYYNGGKILSNDRQYIYSPLCEYKKKINDISSYVSVPFKINIRNLGTSNFVNNKKDVLDNDYIYENIKKEKSKHKKIIFLLFVSLFGLYGFFESYNPEFFLYDIFLKFCLKYIDGEICHDLFLLLGKYNILPYDTSNDSIYACTNIKHLDFINPFGVAAGFDKNGVCIDSILKLGFSFIEIGTITPRGQTGNAKPRIFRDVESRSIINSCGFNNMGCDKVTENLILFRKRQEEDKLLSKHIVGVSIGKNKDTVNIVDDLKYCINKIGRYADYIAINVSSPNTPGLRDNQEAGKLKNIILSVKEEIDNLEKNNIMNDESTYNEDNKIVEKKNNF…	569	1	null	no	GO_0006222, GO_0055114	GO_0006207, GO_0042493	GO_0006222,GO_0055114,GO_0006207,GO_0042493	0	0	0	0	0	0	0	0	0	0	0	0	0	0	0	0	0	0	0	0	0	0	0	0	0	0	0	0	0	0	0	0	0	0	0	0	0
3853	PF3D7_1251300	thymidylate kinase	TMK	ATGACTGATGATAAAAAAAAAGGAAAATTTATAGTTTTTGAAGGTTTAGATAGATCCGGGAAATCTACCCAGTCAAAACTACTTGTTGAATATTTAAAAAATAATAATGTTGAAGTTAAGCATTTATATTTCCCAAATAGGGAAACGGGAATAGGTCAAATAATTTCGAAATATTTAAAGATGGAAAATAGTATGTCTAACGAAACTATTCATTTATTATTTTCAGCCAACAGATGGGAACACATGAACGAAATAAAAAGTCTCTTGTTAAAAGGTATATGGGTTGTCTGTGATAGATATGCATATTCAGGAGTAGCTTATTCCTCAGGGGCCTTGAATTTAAATAAAACGTGGTGTATGAACCCAGACCAAGGTCTAATAAAACCGGATGTTGTTTTC…	MTDDKKKGKFIVFEGLDRSGKSTQSKLLVEYLKNNNVEVKHLYFPNRETGIGQIISKYLKMENSMSNETIHLLFSANRWEHMNEIKSLLLKGIWVVCDRYAYSGVAYSSGALNLNKTWCMNPDQGLIKPDVVFYLNVPPNYAQNRSDYGEEIYEKVETQKKIYETYKHFAHEDYWINIDATRKIEDIHNDIVKEVTKIKVEPEEFNFLWS	210	0	null	no	GO_0006233	GO_0006235, GO_0006227	GO_0006233,GO_0006235,GO_0006227	0	0	0	0	0	0	0	0	0	0	0	0	0	0	0	0	0	0	0	0	0	0	0	0	0	0	0	0	0	0	0	0	0	0	0	0	0
1197	PF3D7_0605600	nucleoside diphosphate kinase, putative	null	ATGAAGGATGAAAGGTGTATTTTTATAATATTACCAGATGTTACTAATGATCTTAAAGACGAAGAAGTTCTAGAAAAATTAGAAGAAAAAAATTTTATTATTTTGAAAAAAAAAAAAGTTCACTTGACAGAAAATGAAATAAAAGAAATATTCGATTTTACACCTGAGCAATATAATGATATAAATGAATTTTATGATTATATAGAAAGTGGTTTGTCATTGATTAGTTTAATAGAACATATAGAAGGAGATACTATTAGTAAATTAAATTCTTTAACTAAAAGTACTTCTATATTAATAAAGGATGAAAAATACTTTGAATGCTTAGAATATCAATGCAATTTAAAGTGCAAAAACGTTCCCTTTTATTTTAGTAAAAATGAGTGGTATTTTATTAGA…	MKDERCIFIILPDVTNDLKDEEVLEKLEEKNFIILKKKKVHLTENEIKEIFDFTPEQYNDINEFYDYIESGLSLISLIEHIEGDTISKLNSLTKSTSILIKDEKYFECLEYQCNLKCKNVPFYFSKNEWYFIRDIDFFFPSYDNICLERTFIILKPDVVEMNKMNAIVNDILNFDLLIVAIKRGVLSVERAKKLYSDLVDKPYYNDLIDFMTSSKGIVCLLIEGPNCIRRAHILCGPSFSLVDFEHMPNYCLKKKYGTNQMKNAVHISKDDNVEKEIDLFFGNENFKSENGIIIIKESILGVDGLMRLREYLNDYGFRILEEKLVSMRTYEIKSIYDMNGINYLNDHSRLQQNIGNNNLIEESNFIIILLSRINCQTCLHYLKYLDIINKCENKKWNNV…	1828	0	null	no	GO_0006241, GO_0006183, GO_0006228, GO_0006165	GO_0006241, GO_0006183, GO_0006228	GO_0006241,GO_0006183,GO_0006228,GO_0006165,GO_0006241,GO_0006183,GO_0006228	0	0	0	0	0	0	0	0	0	0	0	0	0	0	0	0	0	0	0	0	0	0	0	0	0	0	0	0	0	0	0	0	0	0	0	0	0
4535	PF3D7_1366500	nucleoside diphosphate kinase	NDK	ATGGAAAAGAGCTTTATTATGATTAAGCCCGATGGCGTCCAGAGAGGTTTGGTAGGAACAATTATCAAACGCTTTGAAAAGAAGGGATATAAGCTGATAGCCATAAAAATGCTTAATCCAACTGAAGAAATATTGAAAGAACATTATAAAGAATTATCAGACCAACCATTTTTTAAAAATTTAGTAGCATATATAAGTAAAGGACCTGTAGTTGCTATGGTATGGGAAGGTGTCGATATGGTAAAACAAGGAAGAAAATTAATTGGTGAGACTAATCCTTTAACTAGTAACACAGGTACAATAAGAGGAGACTTCTGTTTAGAAGTAAGTAAGAATGTAATACATGGAAGTGATTCAGTAGCTTCAGCTAATAAAGAAATAAATATATGGTTTAAGGCA…	MEKSFIMIKPDGVQRGLVGTIIKRFEKKGYKLIAIKMLNPTEEILKEHYKELSDQPFFKNLVAYISKGPVVAMVWEGVDMVKQGRKLIGETNPLTSNTGTIRGDFCLEVSKNVIHGSDSVASANKEINIWFKAEELTQWKHHMKEWICS	149	0	null	no	GO_0006241, GO_0006183, GO_0006228, GO_0006165	GO_0006241, GO_0006183, GO_0006228	GO_0006241,GO_0006183,GO_0006228,GO_0006165,GO_0006241,GO_0006183,GO_0006228	0	0	0	0	0	0	0	0	0	0	0	0	0	0	0	0	0	0	0	0	0	0	0	0	0	0	0	0	0	0	0	0	0	0	0	0	0
675	PF3D7_0408500	flap endonuclease 1	FEN1	ATGGGAATCAAAGGATTGACTAAATTCATCGCGGATGCCGCTCCGAATGCAATAAAAGAGATAAAAATAGAAAGTTTGATGGGACGGATTATTGCCATCGATGCTTCTATGTCCTTATATCAATTTATCATAGCTATTAGAGATTCTGAACAATATGGTAATTTAACAAATGAGTCAGGAGAAACGACTTCACATATTTCTGGGTTAATGTCTAGGAGTATACGTTTAATGGAAAATGGACTGAAACCCATTTATGTTTTTGATGGCGCGCCCCCTGAATTAAAAGGTTCCGAATTAGAAAAAAGAGGAGAGAAAAGACAGAAAGCTGAAGAGTTATTAAAAAAAGCAAAAGAAGAAGGTAATTTAGAAGAAATAAAAAAGCAGAGTGGTCGAACAGTA…	MGIKGLTKFIADAAPNAIKEIKIESLMGRIIAIDASMSLYQFIIAIRDSEQYGNLTNESGETTSHISGLMSRSIRLMENGLKPIYVFDGAPPELKGSELEKRGEKRQKAEELLKKAKEEGNLEEIKKQSGRTVRVTRKQNEEAKKLLTLMGIPIIEAPCEAESQCAFLTKYNLAHATATEDADALVFGTKILIRNLNANATSNQNKNKNNSKRGYILTEINLEQVLKGLNLTMDEFIDFCILCGCDYCDTIKGIGSKTAYNLIKEYNCIEKIIENIDQNKYQVPSNFRFQEARKSFINPNVLPKEDIKIDWNEPQIEELKHFLIKDYNFNELRVTNYINRLLKARKVTTQRRLDNFFTACTKKSTKLIVEETKKEQTLPARKGKKRPTAGDKNKQKAVK…	672	0	null	no	GO_0006281	GO_0006259	GO_0006281,GO_0006259	0	0	0	0	0	0	0	0	0	0	0	0	0	0	0	0	0	0	0	0	0	0	0	0	0	0	0	0	0	0	0	0	0	0	0	0	0
706	PF3D7_0411900	DNA polymerase alpha catalytic subunit A	null	ATGAGTAGTGTTTTTGATAAACTCAAGAAACAGAGATCAAAGGAATGTAAGGCAACCGATTTTTATGAGGTTAAAAATAAAAATGATGAAATATACGAAGTAGTGGATGAGGAAGGGTATATGAAAAATAAAAGGTCCTTACAAAATTTTATAGTTGGAGGTGATAAAGATTTTGATTCAAGTGATGATGTGATTGTGGAAAATATAAATTTTACTTTATTGAAAAAAAAAAATGTTGATAAAGAACCCAAAGTCAAGAGAAATCAAACCCTAGATGATTTCATACGAGAAAAGAAACTTCGAAAAACGTTGTCAGGAAATAAATTAAGCAAAGAAGAAATTCACAAAACAAAAAATATCGAAGAACTTATGGACCAAAATACCTCAAGTGATAGTGAT…	MSSVFDKLKKQRSKECKATDFYEVKNKNDEIYEVVDEEGYMKNKRSLQNFIVGGDKDFDSSDDVIVENINFTLLKKKNVDKEPKVKRNQTLDDFIREKKLRKTLSGNKLSKEEIHKTKNIEELMDQNTSSDSDGESRTRKRKTRESYENSMYKNMNKSSCYIRSKDYEYNIYDMKHTNEYNKKIIENNNNNNNNYYYYNNYNDMSFSNKDLEYSKYTKVKNEKEDIDKHQPYDIHRDMGSSLKKKENYVKQEEQSNMINVGNDDDINEKKNKIHLMKNELVLKKEIQIKENEENIKEVKEQGSKNNNNKNNNDNNNNNNNVDDFYNDYILNEMNISPLFIKIENETLKKEEKKLKENDINDKEEDILENDIDSEMLKNKYEQLIKYEENNNLFVNVYVF…	1912	0	null	no	GO_0006260, GO_0006139	GO_0006260	GO_0006260,GO_0006139,GO_0006260	0	0	0	0	0	0	0	0	0	0	0	0	0	0	0	0	0	0	0	0	0	0	0	0	0	0	0	0	0	0	0	0	0	0	0	0	0
2633	PF3D7_1017000	DNA polymerase delta catalytic subunit	null	ATGGAAGAACTGAAAACTTGCCCATTCACAAATGTGATTCCGTACGGGTTGCTATATGATAAATTAAAAAAAGAAAAAAATAATGACGTTCCTGAAAATTATGTAATAGAAGAATTTGATAAGCTCTTGAAAAATTATGAGAGACCAAATGTATACGATGAGATAGGAAATGCAACATTTAAGAATGATGAAGATTTGATAACGTTTCAAATAGATTTGGATTATACAGTAGAAAATATATTTAAAAATATGATATATAACGAAAGTGGTTCAAATAATAGTATATTAAATGATATATATATGCCATATAGGATTTTATTAAGTAAAGATAAAAATTATGTGTCTGTTCCTATTATTCGTATATATAGTTTAAGAAAAGATGGATGTAGTGTTTTAATA…	MEELKTCPFTNVIPYGLLYDKLKKEKNNDVPENYVIEEFDKLLKNYERPNVYDEIGNATFKNDEDLITFQIDLDYTVENIFKNMIYNESGSNNSILNDIYMPYRILLSKDKNYVSVPIIRIYSLRKDGCSVLINVHNFFPYFYVEKPDDFDNEDLIKLEMLMNENLNLNSQYKIYEKKILKIEIVKTESLMYFKKNGKKDFLKITVLLPKMVPSLKKYFEGIVHVNNKSIGGIVYEANLPFILRYIIDHKITGSSWINCKKGHYYIRNKNKKISNCTFEIDISYEHVEPITLENEYQQIPKLRILSFDIECIKLDGKGFPEAKNDPIIQISSILYFQGEPIDNCTKFIFTLLECASIPGSNVIWFNDEKTLLEAWNEFIIRIDPDFLTGYNIINFDLPY…	1094	0	null	no	GO_0006260, GO_0006139	GO_0006260	GO_0006260,GO_0006139,GO_0006260	0	0	0	0	0	0	0	0	0	0	0	0	0	0	0	0	0	0	0	0	0	0	0	0	0	0	0	0	0	0	0	0	0	0	0	0	0
2835	PF3D7_1037000	DNA polymerase zeta catalytic subunit, putative	null	ATGAATTTAGCTGAAAAACCAAAAGCTTTTTTTATTTGCAAATTTTTATTTTTTTATTATATTTATAAAAAACCCATCTTACCTTTTGATTCTTTGAAATGTAAAATTAGTGGTAAAGAGATACCCTATGTTTGTATTATTCAAATATTAGGTCTAAGTCTTTTAGGCCAACGTGTGTGCTTGTATATACACGACTTTTATCCTTTCTTTTATTTATTAATACCACCTGAGGAAAAGCAAAATGATAAGCTAGAAATAGAATTGTGCTCATTTTTGGAGGAAGAATATGGAAAAGCACGAAAAGATCCAAGTAATAATGTGTGTGTTTATAATATAGAAAGAGTTAAAAGGAAAGGGATTTATGGGTATAATGAAGAGTGCGATGATTTTTTGAAAATA…	MNLAEKPKAFFICKFLFFYYIYKKPILPFDSLKCKISGKEIPYVCIIQILGLSLLGQRVCLYIHDFYPFFYLLIPPEEKQNDKLEIELCSFLEEEYGKARKDPSNNVCVYNIERVKRKGIYGYNEECDDFLKISFLYPNTINYFASLLKKKLFKKRIWDLYEVHINYMLHFLCMKNIYGCSEIYIDKNIYFRKEFVNEINFECIEKEERWYLGEKKYNLDNFKRNKYLEVDAPLVFTIKTINVNFSSLKRETTYDIECDIKHQHILNEKIYTYEFEKNKIKWKKEFNFDLPINHLDSFAKMWMKEKKRCKYMDMDLKRELFYFKSYENDLCFDTFDVLTERTKKMFQGFLEFMKRMQSEKDKVNYEQILEYDNIENVKKYNKVINDDMKLKEDHNFNSD…	2226	0	null	no	GO_0006260, GO_0006139	GO_0006260	GO_0006260,GO_0006139,GO_0006260	0	0	0	0	0	0	0	0	0	0	0	0	0	0	0	0	0	0	0	0	0	0	0	0	0	0	0	0	0	0	0	0	0	0	0	0	0
1396	PF3D7_0625300	DNA polymerase 1, putative	null	ATGAAATTGTTTGATTCATTTTTTAAACATGCTTTGATAAGAATAAATAAAAGGAATATAATATATTTGAATGCCACTAGGTACTATTGTAATAACATAAATTATAATGCTTTGATAAATTTGTTAAATAAGAAAAATGATATAAATAAAGAAATAAATGCCTTATATTCTTTATTAGAAAGACTGTCAAATTATAAGTACAAACAATATAAAGATAAGTTGACTCTGAAAAATAATATAAACGATGAAATTAAAATAACAAATGCTGATAAAATTAATAATATAAATATTGAAAGGGATATGAATATTTCTCATTTGGATCATCATCATAATAATCATCATCATAATAATAATCATCATAATATTAATCATAATAATCATCATCATAATAATCATCAT…	MKLFDSFFKHALIRINKRNIIYLNATRYYCNNINYNALINLLNKKNDINKEINALYSLLERLSNYKYKQYKDKLTLKNNINDEIKITNADKINNINIERDMNISHLDHHHNNHHHNNNHHNINHNNHHHNNHHNINHHNNHHNNHHNNNHFNDYKKLIDNWKNDKIKIFISWCPEIVEDKYKSKCFSIPTYITFHIVITNNDIKLNNLLHNSHEYDDWNFNKIIQTINNQNNLKDKEKEKENGQQHSQEYIGNCKKGESEIPSYDFKESLLEHINESSQLNHSILSHKTKEQTHHTNNNINGNYNNDEHIEEEGKAKTKQNKTKNSIIEEKKKKTKKKKDEESHNDIINYTIKKKTNTNNSLYNIESILNIPKTYEPNIHYDKCIHKEQNHIFFFSFNI…	1444	0	null	no	GO_0006260, GO_0006261	GO_0006260	GO_0006260,GO_0006261,GO_0006260	0	0	0	0	0	0	0	0	0	0	0	0	0	0	0	0	0	0	0	0	0	0	0	0	0	0	0	0	0	0	0	0	0	0	0	0	0
328	PF3D7_0219600	replication factor C subunit 1, putative	RFC1	ATGAGTTCGAAGGACAAAAACTTATTCAGCGATGACGAAAGCGATGATGGTAGGAAAAAGAAGAGGCTGAAAAAAGTATCTAGTTCCTTATTCCATGATGACGATGATGATAATTTTATAAGTAATAAAAAAGTGGAAAAATCCAAATCGAAAAAAAAAAGTGACGCTATATATATTGATGATAATGAAAGCAATAATAATAACAATTATAATAATACTAATAAAAGTAGTAATAGGAAATCATTAGAAAATAAATCATCGAAAACGTCACCGAAATTTTATGATATAACATCCTTTTTTAAACCCTCTTCAAAAAAACTTGAGGATAATAACACTATGAAGAAATCTAATAGTAAGGAAGATGAGAAACTCGTTGTGAATAATCTTAATGACTATTTT…	MSSKDKNLFSDDESDDGRKKKRLKKVSSSLFHDDDDDNFISNKKVEKSKSKKKSDAIYIDDNESNNNNNYNNTNKSSNRKSLENKSSKTSPKFYDITSFFKPSSKKLEDNNTMKKSNSKEDEKLVVNNLNDYFNILQNDNKVTKEDTKSNNVSPKNEINKSNVKRERESEQYEISSENDTVSSKKNVLISPAKKQKTQNNNNEDLQKFDYLPFHNQKFVITGVFKNFTRDELQSKIKEHGGSVMTAVSTKTNYLVHGEYLEDGRLFNEGRKYTKAFELQQQNKSNIKILNEEELLKLLPQTDQTQENDKTYASDTIKTENKDKNYNYEKKDKNYNYEKKDTHNTQNEILNQLWVEKYRPKNLNELVGNNQNVIKLQNWLASWEDVCIKGIKKPAQKTFR…	904	0	null	no	GO_0006281, GO_0006260	GO_0006260	GO_0006281,GO_0006260,GO_0006260	0	0	0	0	0	0	0	0	0	0	0	0	0	0	0	0	0	0	0	0	0	0	0	0	0	0	0	0	0	0	0	0	0	0	0	0	0
3131	PF3D7_1127100	deoxyuridine 5'-triphosphate nucleotidohydrolase	dUTPase	ATGCATTTAAAAATTGTATGTCTGAGTGATGAGGTCAGAGAAATGTACAAGAATCATAAAACACATCATGAAGGTGATAGTGGATTAGATTTGTTTATTGTAAAAGATGAAGTACTGAAGCCAAAGTCCACAACTTTTGTTAAGCTTGGAATTAAGGCAATAGCATTACAATATAAATCTAATTATTATTATAAATGTGAAAAATCGGAAAATAAAAAAAAAGATGATGACAAATCCAATATTGTAAATACGAGCTTTTTATTATTTCCTCGTAGCAGTATATCCAAAACCCCATTACGCTTAGCTAATTCAATTGGACTAATTGATGCAGGTTATAGAGGAGAAATTATTGCCGCCTTGGATAATACTAGTGACCAAGAGTATCACATTAAAAAAAAT…	MHLKIVCLSDEVREMYKNHKTHHEGDSGLDLFIVKDEVLKPKSTTFVKLGIKAIALQYKSNYYYKCEKSENKKKDDDKSNIVNTSFLLFPRSSISKTPLRLANSIGLIDAGYRGEIIAALDNTSDQEYHIKKNDKLVQLVSFTGEPLSFELVEELDETSRGEGGFGSTSNNKY	173	0	null	no	GO_0046080	GO_0006260, GO_0006399	GO_0046080,GO_0006260,GO_0006399	0	0	0	0	0	0	0	0	0	0	0	0	0	0	0	0	0	0	0	0	0	0	0	0	0	0	0	0	0	0	0	0	0	0	0	0	0
524	PF3D7_0317200	cdc2-related protein kinase 4	CRK4	ATGAATATCGACCAAAATAATAATATTGAAAAAAAAATAGCGAATAAAAGAAAAGGAAACATGAACAAGAAAAAAAATATACTACTAAATCAACCGAAGAACGATGAAGTAATTATGAAAAAGAATATGAAAAAGGTGAAAAATGAAAAAATATGTAAAAATGGAAAAGACAATATAGAAGAAACCTCAACACATTTGATAAATAGAAGAAGAAAAGATAATCATATAAAGGAAGCTATATACAAAGATTTAGAAAAAGAAAAGAAATTTGCATCTTCCACCAAGGGTACATCGATAAAATCTAGTGGTTTGTTAGATTTAAATAAAGAAGAGCATGTTGAAAAGGGCATGGTTGATAATAAAAGTGTAATAACAAGAACGTCTTCTAATTATTCCATA…	MNIDQNNNIEKKIANKRKGNMNKKKNILLNQPKNDEVIMKKNMKKVKNEKICKNGKDNIEETSTHLINRRRKDNHIKEAIYKDLEKEKKFASSTKGTSIKSSGLLDLNKEEHVEKGMVDNKSVITRTSSNYSILNYFKNSKDTNKSGMTNNNNNNNNINNINNNNNIVKTSSGSNKTRNISNNRNNIHNKPNGYNLKRDNIKITNYMKQSDRHIEKNNEVHLDKHGYKDDNYKKTFNHNNYLSMKNNIENNLMNYKKCKLDRIHAENNSSIDSFQSKDDKNVIIENKDTYKNKEYMINKDVVNLTEHKNDSYDMVCNRLGTSCNVLNTISLSQKNNDNINLNACNNSLVIKGEERKSRCTGQNRASSVGLLKRNSIYNYKENLRDDLINNCVEMENMDT…	1553	0	null	no	GO_0006468	GO_0006260, GO_0007067, GO_0006468	GO_0006468,GO_0006260,GO_0007067,GO_0006468	0	0	0	0	0	0	0	0	0	0	0	0	0	0	0	0	0	0	0	0	0	0	0	0	0	0	0	0	0	0	0	0	0	0	0	0	0
4947	PF3D7_1437200	ribonucleoside-diphosphate reductase large subunit, putative	null	ATGGGTGATAATGTAAAAAGACTACCATTACCATCAGAGAATGGAGAAATTAAAAAGAGTACATCAGGAAGATTAAGTGATGATGGTATTAAGAGAACCCCATCAGGTAAACCTATACAAACAATGTATGTGTTGAATAGAAAGGGAGAAGAAGAAGATATATCCTTTGATCAAATTTTAAAAAGAATACAAAGGTTATCATATGGTCTTCATGAATTAGTAGATCCTGCTAGAGTTACACAAGGTGTAATCAATGGGATGTATAGTGGTATAAAAACCTGTGAATTAGATGAATTAGCTGCTCAAACATGTGCATATATGGCTACAACACATCCTGATTTTTCTATATTAGCTGCACGTATTACTACAGATAATTTGCACAAAAATACTAGTGATGAT…	MGDNVKRLPLPSENGEIKKSTSGRLSDDGIKRTPSGKPIQTMYVLNRKGEEEDISFDQILKRIQRLSYGLHELVDPARVTQGVINGMYSGIKTCELDELAAQTCAYMATTHPDFSILAARITTDNLHKNTSDDVAEVAEALYTYKDVRGRPASLISKEVYDFILLHKDRLNKEIDYTRDFNYDYFGFKTLERSYLLRINNKIIERPQHLLMRVSIGIHIDDIDKALETYHLMSQKYFTHATPTLFNSGTPRPQMSSCFLLSMKADSIEGIFETLKQCALISKTAGGIGVAVQDIRGQNSYIRGTNGISNGLVPMLRVFNDTARYVDQGGGKRKGSFAVYIEPWHSDIFEFLDLRKNHGKEELRARDLFYAVWVPDLFMKRVKENKNWTLMCPNECPGLS…	847	0	null	no	GO_0006260, GO_0055114	GO_0006260, GO_0009263	GO_0006260,GO_0055114,GO_0006260,GO_0009263	0	0	0	0	0	0	0	0	0	0	0	0	0	0	0	0	0	0	0	0	0	0	0	0	0	0	0	0	0	0	0	0	0	0	0	0	0
2621	PF3D7_1015800	ribonucleoside-diphosphate reductase small chain, putative	null	ATGAGTAAGGAACAATATCACGATCAAGAAGTATTGTTGGAGGCTCAAAATAATGATGAAATTTTGAAGGAAAATAAGTTCAGATGGGTTATGTTCCCAATAAAGTACAAAACATTCTGGAGTTATTATAAAGAAATTGAATCTCTCTTTTGGACTGCTGAGGATTATAATTTTGATAAAGACAAGCAATATTTAGAAAATATTGATAAAAACATGTTGGTTAAGTTGTTTGAACTTATATGCTTTTATAGTTTAAAAGATTTACATGTTTATGAAGAACAAGCTCTTATCACCAGTAAAATGTTAGACATTATTCAGATACCTGAAGGAAGAGCTTTTTATGGTTTTCAAATGTGTATGGAGAATATACATGATGAAGTATATGCTTGTATATTCGAA…	MSKEQYHDQEVLLEAQNNDEILKENKFRWVMFPIKYKTFWSYYKEIESLFWTAEDYNFDKDKQYLENIDKNMLVKLFELICFYSLKDLHVYEEQALITSKMLDIIQIPEGRAFYGFQMCMENIHDEVYACIFETYIPDSKQKRVIINKVIELDSVLKKQKWLTEIFESNIPYYNKLVLLYISKVLFNGTLNILIGYCKENSILPCLCNVHEKIHRDEYLHGDFSVMCCNHLVNKLKYEHVLDYFKMAVDLEYQFSLEMLELNVLKIKKEQVRAFLEYLTDTMLTNLKYPKHYNSKYPFSWPEFTKIIVNENGKEETVKKGENVYGEKQILFDEDF	335	0	null	no	GO_0009186, GO_0055114	GO_0006260, GO_0009263	GO_0009186,GO_0055114,GO_0006260,GO_0009263	0	0	0	0	0	0	0	0	0	0	0	0	0	0	0	0	0	0	0	0	0	0	0	0	0	0	0	0	0	0	0	0	0	0	0	0	0
1618	PF3D7_0717500	calcium-dependent protein kinase 4	CDPK4	ATGGGACAAGAGGTATCGAGTGTTAACAACACAAAAAATGAACACCATAAAACAAATAAGAAAAGTTTGAAAGGGGGTAATGAGAGACATGAAATGAAAGAGAGTAGTGTAGGTATATCTAAGAAAATCGTAGAGAATAGTTTTAATAATAGTAAATTAAGACCTGGTATGTTTATACAGAATAGTAATGTTGTATTTAATGAACAATATAAAGGAATAAAAATATTGGGTAAAGGTTCTTTTGGTGAGGTGATACTTAGTAGGGATAAACATACTGGTCATGAGTATGCAATAAAAGTTATTAGCAAAAAACATGTTAAAAGAAAAACTGATAAAGAAAGTTTATTAAGAGAAGTAGAGTTATTAAAAATGTTAGATCATATTAATATAATGAAATTA…	MGQEVSSVNNTKNEHHKTNKKSLKGGNERHEMKESSVGISKKIVENSFNNSKLRPGMFIQNSNVVFNEQYKGIKILGKGSFGEVILSRDKHTGHEYAIKVISKKHVKRKTDKESLLREVELLKMLDHINIMKLYEFFEDNNYYYLVSDVYTGGELFDEIISRKRFYEIDAARIIKQILSGITYMHKNNVVHRDLKPENILLETKNKEDMIIKIIDFGLSTHFEYSKKMKDKIGTAYYIAPDVLHGTYDEKCDIWSCGVILYILLSGCPPFNGSNEYDILKKVEAGKYTFDLPQFKKISDKAKDLIKKMLMYTSAVRISARDALEHEWIKMMTSKDNLNIDIPSLELSIANIRQFQSTQKLAQAALLYMGSKLTTIDETKELTKIFKKMDKNGDGQLDRN…	528	0	null	no	GO_0006468	GO_0006260, GO_0036388, GO_0006468, GO_0090307	GO_0006468,GO_0006260,GO_0036388,GO_0006468,GO_0090307	0	0	0	0	0	0	0	0	0	0	0	0	0	0	0	0	0	0	0	0	0	0	0	0	0	0	0	0	0	0	0	0	0	0	0	0	0
1446	PF3D7_0630300	DNA polymerase epsilon catalytic subunit A, putative	null	ATGTCTACACAAACAAGGACAAAAGGATGGGAGAAGGAATCAAAAATTAATCCAGATTATGAATATGAGAGATTGTTAAAATTAGAAAATAAGTTTCATATAAAAGCATGGATTAATAAAGGAGAGAAAGAAGGATATCTTTATAATATAGTTCCTACTACTATGAATGTAGTAGCAAAAAATTCAAATAAATCACATAAAAAAACAGGTGTACACATGTATTTTGTGTCAGACAATAACAAGACGTGGAGATTAACTCTTTTTTATAGACCCTACTTTTATTTAAAAACCAAGAATATACATAATTATGAACAAGTAACAAAATTTTTAAAAAAGGAACTAGATAAGTATAACGTTGAAATTGATTATGTAAAAAAAGAGGATTTAAGTTTATACGAT…	MSTQTRTKGWEKESKINPDYEYERLLKLENKFHIKAWINKGEKEGYLYNIVPTTMNVVAKNSNKSHKKTGVHMYFVSDNNKTWRLTLFYRPYFYLKTKNIHNYEQVTKFLKKELDKYNVEIDYVKKEDLSLYDHLNKKRSYLSNIFFKLSYDTIENLMNARDFLVKIIERNKKQNKNYNNSNNDKHIFNNEDLSYSQLEFSYKNEYSYNKYDDQKENTQKQQFTTNITEEDDKKRILNAKSNDNNNNNNNNTHNSNNNNNILNMNDIIVTTKKQILSKEEIMNEIIEIYEYDVKYLTRICIDKNIRCGLWYKVKREEDELYTELIQFEILNKKVLAPLNILAWDIECYKDELKFPDKEKDEIILISYMYNAQGYLIVNRNVMSKNIREFLYKPNEEYSG…	2907	0	null	no	GO_0006139	GO_0006261	GO_0006139,GO_0006261	0	0	0	0	0	0	0	0	0	0	0	0	0	0	0	0	0	0	0	0	0	0	0	0	0	0	0	0	0	0	0	0	0	0	0	0	0
3581	PF3D7_1223300	DNA gyrase subunit A	GyrA	ATGTCGTTTAAATTTTCCATTGTTTTTGTTCTGTATTTATTATTTTTATTGAAATTTAATAAGAGGTTTATTTTTTTAAAAAGTGAAAAAATTACAAGTTATATAAATACACAAATCCCGAATTATAGTAGCAGCCCTCCTTTTTTTTTAAAAAAAGAGGCTAAAAATAATATTAAAAAATGTTATTTTATAAAGAGAGAGGGGTATAGGAATATAGGCACAAAAAATGCGTCAAATGCGTTTGTTTTAAATTTCAAGAGTAATCGTTCAACATATACAGACAATGCTTTTAGTTGTACATCTTTGTGTTCTGAAAAGAAGGAAAGAAAAAAGGTCCAAGATCCTTATGATCTGAAGGCGAAGAAGAAAGAAAAGACATATGAATTAAATGATATAAAA…	MSFKFSIVFVLYLLFLLKFNKRFIFLKSEKITSYINTQIPNYSSSPPFFLKKEAKNNIKKCYFIKREGYRNIGTKNASNAFVLNFKSNRSTYTDNAFSCTSLCSEKKERKKVQDPYDLKAKKKEKTYELNDIKNNEKKKDDIVNASNDITNDKLDNINNNINESRKLIKGEYYDVEICEILSKSFLSYANFLILNRCLCDYRDGLKTVQRRIIWSMYEINKGIDKKGYKKCARIVGEVIGKYHPHGDKSVYDALVRLAQKHHNNNLLIKGYGNFGSVEYNAAAMRYTEAKISSFCYDILLDEINDENVEYIKNFDGNEREPKVLCSKIPLLLINGCSGIAVSILSSIPCHNLIDVANCCINFLINENIRDDELFHIIKGPDFSTGGIIISKYDILKNIY…	1222	0	HMM: MSFKFSIVFVLYLLFLLKFNKRFIFLK, NN: MSFKFSIVFVLYLLFLLKFNKRFIFLK	yes	GO_0006265	GO_0006265	GO_0006265,GO_0006265	0	0	0	0	0	0	0	0	0	0	0	0	0	0	0	0	0	0	0	0	0	0	0	0	0	0	0	0	0	0	0	0	0	0	0	0	0
3741	PF3D7_1239500	DNA gyrase subunit B	GyrB	ATGAACGTACGTTTTTTCAAGTCACTTTCTCTTTTCATATTTTTTGTGAAAGGTGTAATATTAGTTGTACAAGCAGGAAAAGGAAATTATGCAAACATTTATAAGAAAAATAATATAAATATTTTTAATTGCATGAAAAGGAAATATGATAAGAAATTGTCTTCGTCTGTAGTGAATACTAATGATAAGGCATTATATGAGTCGTCCATTCTGAAATATTATTACCTGCTCGATAAATATAAAAAACCGAATAGGAAAAAGATATATGGATATATAAGTAATGTTTCTCGTTTTCCTTTGGAAGAAGAAAGGAAAAGAAAAAAATTAGAACATATGAATAAACGAAATATATATCCATGTTATAATTATGATGCTAAAGATATTGTAATATTAGAAGGA…	MNVRFFKSLSLFIFFVKGVILVVQAGKGNYANIYKKNNINIFNCMKRKYDKKLSSSVVNTNDKALYESSILKYYYLLDKYKKPNRKKIYGYISNVSRFPLEEERKRKKLEHMNKRNIYPCYNYDAKDIVILEGLEAVRKRPGMYIGNTDVKGLHQILFEIIDNSVDEYNNFECNTIKVVIHKDDSVTIEDNGRGIPCDVHEKTKKSALETVLTVLHSGAKFFDDEMDDEIDNNMNNTGNTNTSEKNNRDNISNNNNNNNNNKRTKKNSKESAQKYKYSSGLHGVGLSVANALSSFMKVKVFRNNKIYSIELEKGKVTKELTITNCPINKRGTQIHYKPDSSIFKSSTKHNSDLIKNRIHQLAYLNEKLTFYFYDERSENKNSIYISKGNKSNEIIKNKK…	1006	0	HMM: MNVRFFKSLSLFIFFVKGVILVVQAG, NN: MNVRFFKSLSLFIFFVKGVILVVQAG	yes	GO_0006265	GO_0006265	GO_0006265,GO_0006265	0	0	0	0	0	0	0	0	0	0	0	0	0	0	0	0	0	0	0	0	0	0	0	0	0	0	0	0	0	0	0	0	0	0	0	0	0
4909	PF3D7_1433500	DNA topoisomerase 2	TOP2	ATGGCGAAAAATAAAACTATTGAGGAGAGGTATCAGAAGAAGTCTCAAATCGAACATATTTTGTTAAGACCTGATACCTACATAGGAAGTGTAGAAATGCATACTCAGTTATTATGGGTATGGAATAAAGAAAAGAATCGTATGGTTCAAAAGAATATTACATATGTACCAGGTTTGTATAAAATTTTTGACGAGATTATAGTAAATGCAGCAGATGTTAAAGCAAGAGAAAAAGAGAAGAGCGAGAATCCTATGACATGTATCAAAATTGAAATAAATAAAGAAAATAAGCGAATAAGTGTATATAATGATGGGGAAGGTATTCCTGTAGATATACATAAAGAAATGAATATATATGTACCACATATGATTTTTGGAGAATTATTAACTTCTGATAAT…	MAKNKTIEERYQKKSQIEHILLRPDTYIGSVEMHTQLLWVWNKEKNRMVQKNITYVPGLYKIFDEIIVNAADVKAREKEKSENPMTCIKIEINKENKRISVYNDGEGIPVDIHKEMNIYVPHMIFGELLTSDNYDDAEDRITGGRNGFGAKLTNIFSKEFIVQCGDSSRKKEFKMTWSDNMSKFSEPHIKNYNGKDYVKVTFKPDLNKFGMTEMDDDIESLLFKRVYDLAGTCSVRVYLNGQRLAVKDFKSYVDLYLKDNSNDNKNNKGQNDNNNNNNNNNDENANQNNDNLDVSLSNEPADGTPTKNNNNNNNNNDEDEIVKIHEKQHRWEIVVSKSDGSQFQQVSFVNSICTTKGGSHVNYIVEQLLSSLSKKANAKNKGGMEIKSGHIRNHLWVFV…	1472	0	null	no	GO_0006265	GO_0006265	GO_0006265,GO_0006265	0	0	0	0	0	0	0	0	0	0	0	0	0	0	0	0	0	0	0	0	0	0	0	0	0	0	0	0	0	0	0	0	0	0	0	0	0
934	PF3D7_0510500	topoisomerase I	TopoI	ATGCAATCAATGGAAATAAATGATAATAACAGTATCAAGAATGAAAGTACATCTGATGATGATATATTAATTAATAAAATTAAACAAAACTTGGGTAATAATAAATCATGTAATTCTAGATCTTCCAAAAAGGAATCTATAAAAAAGCAAAAGAGCAATTCTGAACTTGGTATAAAAAAGAACACAAAGAAATCATTAGGTATAAAAAAAGAGGAAGAAAAAAAAAAACAAATAAGCAAAAGAAAAAGTAATGAACTAAAAGAAAAAAATAATTTGAAAGAGGGAAAAAAGAAATATGTGGAAAAAAAATCTAGAACAGTAAAAGATGAAACCAAGTTAACGAATGTTATAAAAAAAGAAACTCAAAATAATAAGAAACCTAAAAAATTACTTAAAAAA…	MQSMEINDNNSIKNESTSDDDILINKIKQNLGNNKSCNSRSSKKESIKKQKSNSELGIKKNTKKSLGIKKEEEKKKQISKRKSNELKEKNNLKEGKKKYVEKKSRTVKDETKLTNVIKKETQNNKKPKKLLKKSEENFEPINRWWEKIDDQTDIQWNYLEHRGLIFSPPYVQHHVPIFYKSIKIELNAKSEELATYWCSAIGSDYCTKEKFILNFFKTFINSLENDNIIKQENETKLKKGDISNFKFIDFMPIKDHLLKLREEKLNKTKEEKEEEKKMRMEKELPYTYALVDWIREKISSNKAEPPGLFRGRGEHPKQGLLKKRIFPEDVVINISKDAPVPRLYDNMCGHNWGDIYHDNKVTWLAYYKDSINDQIKYTFLSAQSKFKGYKDLMKYENAR…	839	0	null	no	GO_0006265	GO_0006265, GO_0042493	GO_0006265,GO_0006265,GO_0042493	0	0	0	0	0	0	0	0	0	0	0	0	0	0	0	0	0	0	0	0	0	0	0	0	0	0	0	0	0	0	0	0	0	0	0	0	0
3924	PF3D7_1304100	DNA ligase I	LigI	ATGAATTTCCTAATATTAGTTGTATTAATTAAGATGGTTGTATGTAAAATTATTAATTATGTTAGAAGTGATTATAATTTTATGCTGTCATTTTTAAGGACGAGAAAAATATTTAGTCATAAAAAGATTTATTTCAATTTTAAAGTTTCTAAGAATATTACAAAGAATTCATCATCTAATAGTTATAGTGATATATTAAAATGTTTCTCTTTTCCAAGAAAAGGAACTAACGATAAGACGAAGGAAAATGAAACATTTGAAAAAGGAGAAGTAAAAGAAGAAGAAGAAGAAAAAGATAAAAACGTCAAAAGGAAAATTATTAATGAAAGTAGTAAAAATAAAAGAGCTAAAGTTAAGAATGAAAATGATGTTATAAAAAAAGGGTCGTTATTTAATTGT…	MNFLILVVLIKMVVCKIINYVRSDYNFMLSFLRTRKIFSHKKIYFNFKVSKNITKNSSSNSYSDILKCFSFPRKGTNDKTKENETFEKGEVKEEEEEKDKNVKRKIINESSKNKRAKVKNENDVIKKGSLFNCVVREDEKVNDLSSPKFNPVHFNINDLYLSEKDKEKHKFKDSLLFTFLTNAFNQIEELKGSGTGSKKNVSIILSNIFRVLIYYSPNDLIPAVYITLNKVAPDYLNVEAGVGEALILKTMSEAYSRTESSIKKDLQQIEDLGIIAENCSCKMRTIFPLPRLTIQSVFHELKSIPNLIGSNSQQKKREVIKKLLVSAKTSEAKYIVRFLQQRLRIGVNSATVVQALSYAFILTRPSIPDDIIKRGKEINENLINGKLDGTNNLINKSNN…	912	0	HMM: MNFLILVVLIKMVVCK, NN: MNFLILVVLIKMVVCK	yes	GO_0071897, GO_0051103, GO_0006310, GO_0006281	GO_0006266, GO_0006273	GO_0071897,GO_0051103,GO_0006310,GO_0006281,GO_0006266,GO_0006273	0	0	0	0	0	0	0	0	0	0	0	0	0	0	0	0	0	0	0	0	0	0	0	0	0	0	0	0	0	0	0	0	0	0	0	0	0
291	PF3D7_0215800	origin recognition complex subunit 5	ORC5	ATGTATAAAATAAAAAATAACGAGAGTGATATTAATTCCGATGATTGTAATGAAACAGCGCAGGAATGTATATATGGATTCAGTTCTCCAAAAAAGAGTAGAAAGGAATCACCAATTTTTGTGCAGAATAATGATGACACCTGTAGTAGTAACAATATTTATGAAAAGAAAACATGCAGTAATACTAGCGCAAGCAGTGTAAAAAAATATGACAAAAAAGAACAAAGCTTATGTTCTGATATAAATAATTACAACAAAGTGAATATTGAAGGATTAAAAATAAATGAAAGGAATTATGATAGGATAAATAATTCTGAAGAAGAAACAAACATTAACGATGATAATAATGATGATAATAATGGTGATTATGATGATGATAATAATAGTGATGATGATGAT…	MYKIKNNESDINSDDCNETAQECIYGFSSPKKSRKESPIFVQNNDDTCSSNNIYEKKTCSNTSASSVKKYDKKEQSLCSDINNYNKVNIEGLKINERNYDRINNSEEETNINDDNNDDNNGDYDDDNNSDDDDDNDDNNNNDDNNNDDDEDVDDFEDIKENDEYKDPTYSDIYKEAKKCNIRCENIMNSSVNKKNLEEINESDPLNSSDNSMTSSSEESCSEESDKESDKESDKDGNLYDEELNEIIEEGYFKELIPAIPHDILQAYISCLKICGFERQVQLHRLINLLGDLRDPISVIQILGLPGMGKTKVVKNFIKLTNVPFAYVNCLMAVYQSGRSAKNVIYHTILKDLSINLLNEFNEYKKINNITNYSYDPTKLVPNHVSNTDNFFSILHKLLS…	899	0	null	no	GO_0006260	GO_0006267	GO_0006260,GO_0006267	0	0	0	0	0	0	0	0	0	0	0	0	0	0	0	0	0	0	0	0	0	0	0	0	0	0	0	0	0	0	0	0	0	0	0	0	0
4346	PF3D7_1347100	DNA topoisomerase 3, putative	TOP3	ATGGCACGACTGAAAGTGTTGAATGTGGCTGAGAAACCATCTGTAGCCTCTTCCATTGCCGAAATTTTAAGCAAAGGTAGACCTAATAAGATTAAGAGTTGTAGTAAATATAATCCTGTTTTTACATTTGATTATAAGATAAAGAATGACATATGGTATATGTATGTGACATCTGTCACTGGTCATTTGACAGATCAAAAATTTGATGACCGCTATAAAAACTGGCATAATACAGACCCACAAGAATTATTTGATGCTGAAATAACAGTATATGTTGAAAAGGATAAAAAGAATATTGAAAATAATTTAAAAAAATATTCTAAAGAATGTAATATGTTGATTTTATGGTTAGATTGTGATAGAGAAGGGGAACATATATGTTTTGAAGTGATAAATGCC…	MARLKVLNVAEKPSVASSIAEILSKGRPNKIKSCSKYNPVFTFDYKIKNDIWYMYVTSVTGHLTDQKFDDRYKNWHNTDPQELFDAEITVYVEKDKKNIENNLKKYSKECNMLILWLDCDREGEHICFEVINACRITNRKLIIHRAQFSAVTEKDIIHAINNLKEPNKNLAYSVDVRREIDLRMGSIFTRFMTIRYIELVKHETSIISYGPCQFPTLGFVVNRYLDIKNFKNEYYWSIKMKYVYNNDEINPMDDENNYDDHDDEQMDSDSDESDSYYTNNDDSNNYSDETDDYYGDEKKKKKKKKTKKKKKKKNSTKKKKKKKKNKINNNNKKNKHNNVVDFTWSRIRLFDHLAVILIYEELLKNPLCKITNVYESETRKYKPYPLNTLQMTKLVSIYF…	710	0	null	no	GO_0006265	GO_0006268	GO_0006265,GO_0006268	0	0	0	0	0	0	0	0	0	0	0	0	0	0	0	0	0	0	0	0	0	0	0	0	0	0	0	0	0	0	0	0	0	0	0	0	0
4960	PF3D7_1438700	DNA primase small subunit	null	ATGAAAATGGAAATAGTTGGAGATATAAAAGATTCGATCGTTAACGAAAATGATTTAATATTTTATTACAGGAGCTTGTGTCCAATAAATGATTTATATAACTGGTTAAATTATAAAAATGATATTAAGGGTAAATATACCAAATTAAATGATCCTCATTTTTTTTCGAAAAGAGAATTTTCATTCACATGTAAAAAAAGTGATCAAGGAAAAGAAGAGATTTATATAAGATGGCTGTCCTTTAGTAACCCTGAAGAATTTAAGAATAAACTATTATCCGATCTAGTACCTATAAAATTTGATATTGGAGCTATTTATAATTTTCCTGTTTCTCAAAAAGATCAAAAAGGAGATATTTTTCTACCAGTCCAAAAAGAATTAATATTTGATATTGATATG…	MKMEIVGDIKDSIVNENDLIFYYRSLCPINDLYNWLNYKNDIKGKYTKLNDPHFFSKREFSFTCKKSDQGKEEIYIRWLSFSNPEEFKNKLLSDLVPIKFDIGAIYNFPVSQKDQKGDIFLPVQKELIFDIDMNDYDDIRTCCTDKKVCKLCWKFLTVAIVLLDTALREDFSFEHILWVYSGRRGIHCWVADESCRYYTTDARAALADYLNILSGSDTKKKKVSIWGKDKYPMFERAFDICYKYFDVLMEEQDFFKKGSPHVQKLIDYLPYASGKVTDPLKAMKLNELKEYINNNNFNSREIFEKFSSIYNFLTPSNYFKRKNVSGNINMPSFVKEIVFHFTYPRLDINVSKEINHLLKSPFCIHNSTGRVCVPLDIKNINNFNPQSVPTLKLLREQFD…	452	0	null	no	GO_0006269	GO_0006269	GO_0006269,GO_0006269	0	0	0	0	0	0	0	0	0	0	0	0	0	0	0	0	0	0	0	0	0	0	0	0	0	0	0	0	0	0	0	0	0	0	0	0	0
746	PF3D7_0416300	DNA helicase MCM9, putative	MCM9	ATGACGCTATCGAGTTCCGAGTCAAGTATTTTTAGTGAAACAGACGACGATAGTTACAAGGAAGAAGACTACACTTATAATAGAGACGAAAATATAAAGAACATAAAAATTTATAATAAAATAATAATAAAATTATTTTTAAAAAATCGAAAATATTATGAACAAATAAAAAGGATTGCATTAGGATATATAAGTAAAATAGAAGATATTGAATTTTGTAATGTACAAAACAATGAACAGGACAGAAACGAGCATATATATAATTTTTATTTTGATGCCCATGATGCTATTGAATATGGAGAGAATAAATTAATATATTACTTGCAAAACAGTTATCACAAGTTTATGGATGTGATAAACAATTATTCGATTCCACTTTTTTTTCGGATTATCTTTCTT…	MTLSSSESSIFSETDDDSYKEEDYTYNRDENIKNIKIYNKIIIKLFLKNRKYYEQIKRIALGYISKIEDIEFCNVQNNEQDRNEHIYNFYFDAHDAIEYGENKLIYYLQNSYHKFMDVINNYSIPLFFRIIFLSCYFEFLNNEENEKKNNDDNKNNDDNKNNDDNKNNGDNKNNGDNKNNGDNKNYGDNKNYDDNKNYGDNKNYDDNKNYGDNKNYDDNKNYDDNKNYDNNDNDICNDNERKQGEEENNKDNNYYLDSNILHFHNVTTSPSNCLKEDFELFRTNENDMYEKENEHLWQDKNEEYNNIHNEKYINDKNSINNDDTKKKKKKTLDQVGKGRVKENDMDYFFNNFIEYDFCKDNDVMEQIDLYSSCLIKGILFSYMKYTFLKKEEIKLKINN…	1465	0	null	no	GO_0006260	GO_0006270	GO_0006260,GO_0006270	0	0	0	0	0	0	0	0	0	0	0	0	0	0	0	0	0	0	0	0	0	0	0	0	0	0	0	0	0	0	0	0	0	0	0	0	0
1511	PF3D7_0705300	origin recognition complex subunit 2, putative	ORC2	ATGCTGAAAAACTTTGAAGTAAATTCTCCTAAGAAATTGATAAGGAAAATAGAAGAAGAAACATATGAAGAAGACAAAGAAGAGTATTTAATTACGAATCTAACGGAAAATAAAAAAAACATGCCAAGTGTTATTATAAGAATCCCCAGAGATTTAAATAAATTTTTAAGTAATGAAGAAACTACCATAAAATATAATGAAAATATTAAATCATCAAATAATAAAATGAATAAAGAACAAAAATTAACCTCCTTTAAAATGGATAATAAATATGATATGAATTCCGAAGAAAAAATAAGTGCCATGGATAATATAGTTTTAGATAGTACGTATCAATCGGATTCAACACACGAAAGTATATCTTTCTTTAACAAAATCAAAGGACAAAATTATACAATC…	MLKNFEVNSPKKLIRKIEEETYEEDKEEYLITNLTENKKNMPSVIIRIPRDLNKFLSNEETTIKYNENIKSSNNKMNKEQKLTSFKMDNKYDMNSEEKISAMDNIVLDSTYQSDSTHESISFFNKIKGQNYTIDNINNENENNNSSSNGDSDDDSNDDSDNNSYDNSDYYTDDDKPIDESLLKSFKNKYVDVYESNVSNNEYITFIKNHTKNELEHFLQRRKLHHTNEMKVNDIINIDYDKLNEKNIIPYFLTNVFDMEQKKKREKMKLELEKKRKIMEEKRKTKTKVDDKAKTKNDTHINEKKKKKRNENNKVDTKKSVENFTKAANTQKIVKEGKMKTEDNDNSYDEYEDDNSYENKNRRNKKNKTNSNENQKINEDNEESYSDSYNDEFDKEDIDI…	825	0	null	no	GO_0006260	GO_0006270	GO_0006260,GO_0006270	0	0	0	0	0	0	0	0	0	0	0	0	0	0	0	0	0	0	0	0	0	0	0	0	0	0	0	0	0	0	0	0	0	0	0	0	0
4424	PF3D7_1355100	DNA replication licensing factor MCM6	MCM6	ATGTCAGCTATATTTAATGAAAGTGAATTATCCGGACTAGATGCCCATAGTGCCTTTGGTAATAATGAAACTTCCAGTTTTCAAAAGAAGAAAAGGCGAATCGACGAAAATTCTCAAATGAGTGTAAATGATTTAGTTGATGATGGGGAAGAGGAAGAAGATGATGATGATGATGAAGAAGAACCATCATATGTTCAAGATCAAAATATGGCTAAAGTATTTGAGAAATTTTTAAAAACATTTTCTGAAAAAAAAAGTGAAGAAGATGATGATGATGGTGATAGTATTTGGAAAGATAGTTTAAATTTTGATTTTCCAAGTAATTTAGAAATAGCAAAAGATTCTCATTATGTACTATTATTATTTTCTATTCTTCAAAACTCTTATTCAAGAAATAAG…	MSAIFNESELSGLDAHSAFGNNETSSFQKKKRRIDENSQMSVNDLVDDGEEEEDDDDDEEEPSYVQDQNMAKVFEKFLKTFSEKKSEEDDDDGDSIWKDSLNFDFPSNLEIAKDSHYVLLLFSILQNSYSRNKVLIVDMKHVLMWEPTDKNRFDIGSQLYMYIKRHFLRILDIFEKKVQLLAESINPIKTKEVGKICLRFYNKKNPIHSLRSLRCEMLGEMISVRGQVTRTSDVRPELTLAAFKCNECGNIINGVKQQFRYTQPSKCPSASCSNMSDWSLVLEQSYFVDWQKIRLQEIAQESPPGSMPRNMDVILRNDIVDSVHAGDRIIVTGCLIVVPDIPTLMKPGDVPRSVARQLLKKNENSLVSQGLTGIKGVGVQDLNHKLCIYACQIEKLNSS…	929	0	null	no	GO_0006260	GO_0006270	GO_0006260,GO_0006270	0	0	0	0	0	0	0	0	0	0	0	0	0	0	0	0	0	0	0	0	0	0	0	0	0	0	0	0	0	0	0	0	0	0	0	0	0
628	PF3D7_0403700	pre-mRNA-splicing factor CLF1, putative	CLF1	ATGAATTTTAATAGTAAGAAGTTACAGGTTAAGAATAAGAACGCCGCAGAGGTGCAGATTACGGCGGAGCAACTTATTAACGAGGCGTTAGAACTAGAAGAGGTTGAACATAAAGTAAATTACAATTTGATAGATGAAGAAGAGTTGAATGAATATAGAATAAATAAAAGAAAAGAATATGAGGATAAGATACGTAAAAGAAGATATATGATAAGTACGTACATAAAGTATGGATTATGGGAAATAAAACAGAAGGATATTGAAAGATGTCGTTCCATTTTTGAGAGGGCTTTAAATATTGATTATACAAATAAAAATTTATGGTTAAAATATATAGAAGTTGAATTGATTAATAAGAATATAAATAGTGCTAGGAATTTATTAGAAAGGGTTGTTTTA…	MNFNSKKLQVKNKNAAEVQITAEQLINEALELEEVEHKVNYNLIDEEELNEYRINKRKEYEDKIRKRRYMISTYIKYGLWEIKQKDIERCRSIFERALNIDYTNKNLWLKYIEVELINKNINSARNLLERVVLLLPLENIFWKKYAHLEEILNNYVNARNIYERWIKFKIDESSFLCYIYFEERCNEINKCREIFERLIVSIPKLECFYKFIKFEKKYKNIVRARAAYEKCIELLPSCYIDENFYIHFCNFEEEQNEYERCKKIYIEALKILPKNKSELLYKNFLQFQKKYANKDELHESLLIKERIFYEDELKKNKNDYDIWFNYIKLEESNINNINKEKCIIRIRDLYERAISIIPIISSKKFWKRYIYLWINYSIFEELYAQNIQRARDVYNNIIK…	780	0	null	no	GO_0006396	GO_0006270, GO_0000354	GO_0006396,GO_0006270,GO_0000354	0	0	0	0	0	0	0	0	0	0	0	0	0	0	0	0	0	0	0	0	0	0	0	0	0	0	0	0	0	0	0	0	0	0	0	0	0
4055	PF3D7_1317100	DNA replication licensing factor MCM4	MCM4	ATGGGTACACCAAGAAGAAGATTAGGACAACAAAATAACAATAATAATAGTCCCTTTGCATTGAGTTCTTCTAATATATTTGGGTCGAACAATGAGATATTTGGAAGTAATTTTATGCATACGCCTATGTCGAGTAGGAGGACAAAGAACAGTAAAAGTTTTTTAAATAGTATGTTGAATGAATCAAGATATTTAAATCAGAGTAATGCCGGTTCTCAATTTATAAAATATGGACATACCCCTTTAGCTATTAGAAGAATAAAGTGTGCAAGAGCTGATATTGGAGATGTTGGTAGAGAAGCTTTTATGGAAGATGTTGAATCAGGTCGTTTGCCTCATTTTATTGATAGTAATTTAGAACAAATAAAAGAATTATTTAATCAATTTTTTGATGAATTT…	MGTPRRRLGQQNNNNNSPFALSSSNIFGSNNEIFGSNFMHTPMSSRRTKNSKSFLNSMLNESRYLNQSNAGSQFIKYGHTPLAIRRIKCARADIGDVGREAFMEDVESGRLPHFIDSNLEQIKELFNQFFDEFNITNYSDVLDFTDEDRSISEYILLHRDNLKVYLAYYGWKMIKFIETGRQNECRLNNTNYEDDDENNENSEGIRNLEHIKSFEIDLTHIFFFNKKLYKLIIEYPSDCISEIDKIISTKYNSLLALVLEGDTRSSSSDKYPLSSTKQDYCRVRFFNKKHKDTPRKLGPNQIETLVCVKGVIIRCSNIIPEMTMAAFKCTSKKRIGVNNYEKCNEEVYEHVIQGEVQEPVTCSNCNNKNTFELWHNNCCFSSKQLIKLSEVTEHLKQGE…	1005	0	null	no	GO_0006260	GO_0006270, GO_0006268	GO_0006260,GO_0006270,GO_0006268	0	0	0	0	0	0	0	0	0	0	0	0	0	0	0	0	0	0	0	0	0	0	0	0	0	0	0	0	0	0	0	0	0	0	0	0	0
3468	PF3D7_1211300	DNA helicase MCM8, putative	MCM8	ATGGATTTAATTATAGAACTTTATTTTAATAAATCCGAATTGAATGATGATGTGAAGACACTGATATTAAATTGGGTTTCGTTTTTTAAAACAAACTGGAAGGATTTGTTTAATATAGATAAAGAGGTAATATTAAAATTAGAATTTTTTTTGGATAATAAAAAAATAATAAGTAAGAATGCGCCTCCAAACAATGAAGTATACTTACATGAACTTAAGAAGAATCCAGAAGTAGTTTTAAAATTTATGAAAGTGTCTCTTCATCTTTTATTATTTCGATTCTTATGTCTAGATAAAGAAACGGGCGATATAACCATACCTGGTGATGATAAAAATGAAGAAGGAAATAAAAATGGGAAAGGAAATAAAAATGGAAAGGGAAATAAATATGGAAAAGGA…	MDLIIELYFNKSELNDDVKTLILNWVSFFKTNWKDLFNIDKEVILKLEFFLDNKKIISKNAPPNNEVYLHELKKNPEVVLKFMKVSLHLLLFRFLCLDKETGDITIPGDDKNEEGNKNGKGNKNGKGNKYGKGNKYGKGNKYGKGNKNEKNNKNNNDNNIEENDNYNDKEKITKKKNINHNNSNRNNNNNIYCSNKYQMDLFSSKDEIDKFGNEDFLITKLKYDRYKESEIFRNFFFTNKVTIYLYNWNKVDKFESLKSEKVNQLICLRGSVLRVSPIQLLITNLNFVCDKCKCIIKVEFMDGKFEPPKKCMTNNCDGKQFLPIRESAKSLEYQKIILKENRKIVNNIYETNDTNIKNLTVTLEASKFFVNSCIPGNYVEALGILKVISFNNSHLINGK…	1135	0	null	no	GO_0006260	GO_0006270, GO_0006271	GO_0006260,GO_0006270,GO_0006271	0	0	0	0	0	0	0	0	0	0	0	0	0	0	0	0	0	0	0	0	0	0	0	0	0	0	0	0	0	0	0	0	0	0	0	0	0
3758	PF3D7_1241700	replication factor C subunit 4, putative	RFC4	ATGGAGGAAGATTCATTCAAAAATAGATTACTCAAGAGAAATATCGATATATGGATAGAAAAGTACCGACCAGAATTTTTAGATGAAGTAGTAGGAAATCCTTTTGTAATAAATACATTGAAGAGTATTATTACTTCAGGAAATATGCCTAATTTACTTTTAGCTGGTGCTCCTGGTACGGGTAAAACGACAAGCATATTATGTCTGGCAAGCGAAATGCTCGGAAATCAAGCAAAAAAAGCTGTTCTGGAATTAAACGCATCAGATGATAGAGGAATTAATGTGATAAGAGATAGAATAAAAAGTTTTGCAAAAGAAATAATAAGTTTACCACCAGGAAAACATAAAATTATTATATTAGATGAAGTAGATTCTATGACAACAGCAGCTCAACAATCT…	MEEDSFKNRLLKRNIDIWIEKYRPEFLDEVVGNPFVINTLKSIITSGNMPNLLLAGAPGTGKTTSILCLASEMLGNQAKKAVLELNASDDRGINVIRDRIKSFAKEIISLPPGKHKIIILDEVDSMTTAAQQSLRRIMELYSDTTRFALACNQSEKIIDALQSRCAIIRYFKLSDDQVLKRILKICDLENIKYTDDGLDALTFIADGDLRKAVNCLQSTYAGLEVINKENVLHICDIPSPERIENLLKHCVNSEWKKAHDIAYSMIKEGHTPYDISLTSSNVLRRFNIGSEVIQIEFLKIGAMACNTMATGLTSVIQLDKLLADWCMAAKILRSKA	336	0	null	no	GO_0006260	GO_0006272	GO_0006260,GO_0006272	0	0	0	0	0	0	0	0	0	0	0	0	0	0	0	0	0	0	0	0	0	0	0	0	0	0	0	0	0	0	0	0	0	0	0	0	0
5205	PF3D7_1463200	replication factor C subunit 3, putative	RFC3	ATGACCGAAGTTGAACAACAAAGAGGAAGTGAACTAACCCCATGGGTTGAAAAATATAGACCAAATGTACTAAATGATATAATATCGCATGAACAAGTAATATCAACTATTAAAAGATTCGTTCAGAAAGGTGAGTTACCACATTTACTTTTACATGGTCCCCCAGGTACAGGGAAAACGTCTACGATATTGGCTGTGTGTAAAGAATTATATGGAGATAAGAGAAGTTCATTTGTTTTAGAATTGAATGCTTCTGATGATAGAGGTATAAACGTTATTCGTGATCAAATAAAAACATTTGCTGAATCAAAAAATCATTATACAACATGTGAAAAAACAACTTTAAAATTAATTATTTTAGATGAAGCAGATCATATGACATATCCTGCTCAAAACGCT…	MTEVEQQRGSELTPWVEKYRPNVLNDIISHEQVISTIKRFVQKGELPHLLLHGPPGTGKTSTILAVCKELYGDKRSSFVLELNASDDRGINVIRDQIKTFAESKNHYTTCEKTTLKLIILDEADHMTYPAQNAMRRIMENYAKNVRFCLLCNYVNKITPAIQSRCTAFRFAPLKKEYMKNKALDIAKSENVNLTEGGIDSLIRVGHGDMRRILNCLQVVSLSHKNLVIDENVILSTLDIPLPSETKKILEYFTKGSIKESYEFVSNLQYDKGYSTKDIMMCLYESVLTYDFPDSAFCLLLKNFGEIEERCSSGASEQITLSALISAFVEFRTELFKLKYDMSNI	344	0	null	no	GO_0006260	GO_0006272	GO_0006260,GO_0006272	0	0	0	0	0	0	0	0	0	0	0	0	0	0	0	0	0	0	0	0	0	0	0	0	0	0	0	0	0	0	0	0	0	0	0	0	0
409	PF3D7_0305600	AP endonuclease (DNA-[apurinic or apyrimidinic site] lyase), putative	null	ATGAAAATTACTAGTCTTCATTTTTTAATATTTCATAAAAACTTAAATTACGTTTCATCAAAAGTTAAAGCGAAAAAAATATTTTATCAGAGGGCTTTGAATAATATATATCTTTGTACTATTAGAACGATGATTGTTGATATAGCTGAAATAAAGAAAAGAGATAATCATGCATTAGACACTCAGGAATCGCAAGAATTGGTAAACAAAATAAAAGAAATAAAAAACAGTGACGAACAAAATAATAGTAATAATAATAATAATAATAGTAGTAGTAGTAATTTTTGTAGTAATAATAATTCTCCCTTTAGTCACAAAGAAACCAAACTTATGGTTAAAGAAGAGGTGCCAAATTCTATTGTTAAGAATATTCTAAATAATAATAGTTGTGCTACTAGC…	MKITSLHFLIFHKNLNYVSSKVKAKKIFYQRALNNIYLCTIRTMIVDIAEIKKRDNHALDTQESQELVNKIKEIKNSDEQNNSNNNNNNSSSSNFCSNNNSPFSHKETKLMVKEEVPNSIVKNILNNNSCATSIINNKFYTQINNIIPVKPEAMKEENINVSTVNTENDISKEKKENSHYFCDEIKVMKKEYSKDDFVTDVKLEMNDKEEEEEEKQKIGQESTHINIKVEKDTFNECNNSNVNEKKRNRSVDIHNELSNKRILTEDVVVKCNIKNDVKIIVTWNMNSITVRYKNKKKWDEFMNFFNNLNADVLCFQEVRLPAMNLSEPCDNKNKNKNKNDGIRDRGKIKNSDQKSLADYEIMEQILNDDFKDYNAYFSLANIKYSGQLVLVKKNIHIES…	617	0	null	no	GO_0006281	GO_0006281	GO_0006281,GO_0006281	0	0	0	0	0	0	0	0	0	0	0	0	0	0	0	0	0	0	0	0	0	0	0	0	0	0	0	0	0	0	0	0	0	0	0	0	0
963	PF3D7_0513600	deoxyribodipyrimidine photo-lyase, putative	null	ATGGCAAGCGATAGGGATAATAAAGTAGATGGAATAGTACACGAAGCCCTTAAAAAGAAAGAAACGAATTTATTTCAAAAATCCGAAGTTATTAAAAAATTAAATGAAGAAAGAAAAGAGAAAATAATAATACAAGATGGACAAGAAAATAACTTGGATGAGAAAAAAAAAAAAAAAACGATAATAAAAAATAATGAAGATATATTAAAAGATAATATTAATAATTTAAAAAATAATAATAAAACTCACATAAATATTAATAAAGGCATTACCATATGTGAGAAAAATAATAATAATAATAAATATGAAATTCCCATTATAGGAGCATCTAAGAGAATGGATGATATTTCTTCTTATGATGAAAAAAAAGATATTATAACTAATGTAAAGGAAAATCAT…	MASDRDNKVDGIVHEALKKKETNLFQKSEVIKKLNEERKEKIIIQDGQENNLDEKKKKKTIIKNNEDILKDNINNLKNNNKTHININKGITICEKNNNNNKYEIPIIGASKRMDDISSYDEKKDIITNVKENHVDDKKKNIIIINKEDIQKDNTNSNVINNHMRYNKLNANICKYENVFSEKGNKTDIISCTFTDSNKKKQVSFFSQVDKNIMQQTKGNIKKKKKNDEQEEEEKEKEEEKEKEEEKEKEKEKVEEKEKEKVETYLKEPINKLLYKEQFCTDIYKMEILKKDENHKKSIEKNNIVVKGKQNINTSSKNNIFIPLQNNVYLPSQNNVYLPSQNNVCPPLQNNVYLPSQNNVCPPLQNNVCPPSQNKACPSSQNNVCPSSQNNVCPSSQNNV…	1113	0	null	no	GO_0006281	GO_0006281	GO_0006281,GO_0006281	0	0	0	0	0	0	0	0	0	0	0	0	0	0	0	0	0	0	0	0	0	0	0	0	0	0	0	0	0	0	0	0	0	0	0	0	0
1291	PF3D7_0614800	endonuclease III homologue, putative	null	ATGAAGTTATTTCCCTATCTTAACAAAATATGCTTATTGAACTTATATTTTATAAAGATGGAAAAACCATCAATATATTTTATGAATAATAAAATAAAAAAAATACAAATACAATATGAAGAAAGAGAAAATAATGCTCCTATGAAAAATTTTATGTTAGATGAAAAAAAAGAAAATTATGATATAACATATAAAATTAATATAAAAAATGAACAAACTTCTTATCCTTCAAACGATGATATAAAATCACATTGCCAAGATAAACCAGATGAAGGAAATGTATATAAAAATATTAATTTAACAAAAAAAGGAAATAAAAAAGAACATATGAACGATTCATTATTAAATAAAAGAAAGGTTAAAACAGAATATGTAATAAAACAAAAACAAATGAAAAGA…	MKLFPYLNKICLLNLYFIKMEKPSIYFMNNKIKKIQIQYEERENNAPMKNFMLDEKKENYDITYKINIKNEQTSYPSNDDIKSHCQDKPDEGNVYKNINLTKKGNKKEHMNDSLLNKRKVKTEYVIKQKQMKREKEQTVLEEGIKHVHELKKRKNKNVKSDKIKIDEKGVDKKFIDEKGVDKKFIDEKGVDKKIIDEKNVEFKRAHFLLTYNKLKEMRKDIIAPVDKYGCDKLSEKTNDMKVFRFQTLISCMLSSRTKDEVTAMVMDKLKKHGLTVHNILNTTEEQLKKLIYGIGFYNVKAKQILQICHILKNKYNSDIPHTYEELKKLPGIGEKIAQLILQTALNKHEGIAVDIHVHRIANRLNWVNSKNELDTQMKLKSYVQKELWSEINHVLVGFG…	437	0	null	no	GO_0006281, GO_0006284	GO_0006281	GO_0006281,GO_0006284,GO_0006281	0	0	0	0	0	0	0	0	0	0	0	0	0	0	0	0	0	0	0	0	0	0	0	0	0	0	0	0	0	0	0	0	0	0	0	0	0
885	PF3D7_0505500	DNA mismatch repair protein MSH6, putative	MSH6	ATGGCATCATCTAACAAAAAGCAGTCCTCTATTTTAAGTTTTTTTAAAAGCAACGAAGAAAAAACAAATAAATCATCTTGTTTAAACGAAATAAATAATAAAGTTGGTGATGGGAAAGGTCATAAGCAAAATGAGATAAATAACAACGTGCCAGAAAAAAGAAAAAGTGGTGATGATAAGTCCGGAGTGGATTCTAAGAATAAAAATGAAAAAGAGAATTTGGGTTCAAATAAAAAGATAAATATGTTAGATATGTTTTTATCCAAAGGAGAAATGTATAATAAACCTAAAATAATAGATAATATAAATAAGGAGCCGATAAATGGAGATATGTTATCTACGGATAAAAATATGAATGTGAATAAAACTAATAAAATGCATAATCTTTTTCTTGATGAA…	MASSNKKQSSILSFFKSNEEKTNKSSCLNEINNKVGDGKGHKQNEINNNVPEKRKSGDDKSGVDSKNKNEKENLGSNKKINMLDMFLSKGEMYNKPKIIDNINKEPINGDMLSTDKNMNVNKTNKMHNLFLDEEKTDMSKTKCSNDDVYDNNVYNNNVYDNNVHNNNVHNNNVRNNNVHNNNIHNNNNYGNIYRNDNCVVKSNECNNNGVELDEDSNYQNMVHNQMLEGRNYMDNLESSTEDDIIIKKKRKIILDSVSDKECSDAKENNINKNNCSVDNKLTNLLYEPNKEIDDNLLLLDDNNNNNIKKCIEKRKGDDSKKSQELDGLRNKYLNLPISITNDKFRLYIEHYFLYCNTFEFPKWIQPQYIRDINLRTPDHADYDSSTIWTPPPDHKWAIE…	1350	0	null	no	GO_0006298	GO_0006281	GO_0006298,GO_0006281	0	0	0	0	0	0	0	0	0	0	0	0	0	0	0	0	0	0	0	0	0	0	0	0	0	0	0	0	0	0	0	0	0	0	0	0	0
70	PF3D7_0107800	double-strand break repair protein MRE11	MRE11	ATGAAAAGTACACAAAGTAATTTGAATGATGAAGAAAAGGTTATGAATAATAATGAGAAGATTATTAAAAATTCGTATGGAGAATTATTAAGTGGATGTATAAAAAATAAGAGTAGTGATATGAACACAGGTGACGTATATCCTTGTAATGATAAAAACACAAAGATAGTATCCATAAAAAATGTATATAATAATTTGTATAAAACCAGTGATAGCTTGTTTTTTAACGAAGAAAATGAAGAGAACAGGATGGAAAATTGTATCATAAGAAATGATGGAAGGGATATGGAAAATAAATTTAGTTTATATATTAATAATGCTGAAAATAAGGATGATAATAATATGAATAATAATAAAAATGATAATATAAATGATAATATAAATGATAATATAAATGAT…	MKSTQSNLNDEEKVMNNNEKIIKNSYGELLSGCIKNKSSDMNTGDVYPCNDKNTKIVSIKNVYNNLYKTSDSLFFNEENEENRMENCIIRNDGRDMENKFSLYINNAENKDDNNMNNNKNDNINDNINDNINDNINDNINDNINDNINDNINNNINDNINNNIYHNQNNNIYHNIYHNNIINDGVIINEHTSHGDRSSFLNNNKNYNISNYTNHGHNINLNEEKNEKVYMHRNENNEKIHYSNNKDYIEKGNEKSVSSKKGEETYTNNSYNIHLKNMDVKNNERDMCKTMVNNSNIKENKKYSNKTIQQEENTEHEYNIINEEEEEHIKLFKNMNLEEIKNVLSKNDASTLKILLCTDNHLGYKENNSIQKKDSFNSFEEILFIAKKLNVDMILNSGDL…	1233	0	null	no	GO_0006302	GO_0006281	GO_0006302,GO_0006281	0	0	0	0	0	0	0	0	0	0	0	0	0	0	0	0	0	0	0	0	0	0	0	0	0	0	0	0	0	0	0	0	0	0	0	0	0
3155	PF3D7_1129500	A/G-specific adenine glycosylase, putative	null	ATGATGAAAAATGAATCTACTCAAAAAGATAAATTCAACAACATTAAAGAAGAAGAAGACGTGACCTTACCAAATGAACAATCGGATTATCATTATAGCTTTTTACAAAGGTATAGTGTTGAGCTTAAAAAAGATTTACTAAATTGGTATTACAAATATCGACGAAAATTACCATGGAGAGGTGATGAACCCCCCTTTACAACCAGTGTTCAATTATATGAGAACAAAAAACAAGTGGATATTAGATGTTTTTTTGGTAACCATAAAAGGGATGAGATAAAAATAAAAAACAGTAAATCAGATAATGTTAAAAATAATGAGAAAATAAAAGGTACAAAAATTATGAAAATAAAAAAAGAACATAATGAGTTATCATTAGAAAGATGTAAAAGATTAAAA…	MMKNESTQKDKFNNIKEEEDVTLPNEQSDYHYSFLQRYSVELKKDLLNWYYKYRRKLPWRGDEPPFTTSVQLYENKKQVDIRCFFGNHKRDEIKIKNSKSDNVKNNEKIKGTKIMKIKKEHNELSLERCKRLKKEDKDEEKKYNSLSDSLKSENIKSLHDKINNNNNNNNNDDDVVDKNNCNSSLLVHKEEKKHNFINNLMYDKEHLSTKGYQIYISEIMLQQTKVHTVLNFYLKWMNKWNNIFDLAKCNLDDVLILWKGLGYYNRAKNLLECCKIVVDKYNGIFPNDLKLLKTLPGIGDYTSKAICIHLYNRKDICIDTNIIRIFSRITDTINYYNSGTLLKHCEKVSEILCSGESNYSDLSQAFMDLGSSVCNNSPDCSQCPINKYCMIYLKSNKKK…	611	0	null	no	GO_0006281, GO_0006284	GO_0006284	GO_0006281,GO_0006284,GO_0006284	0	0	0	0	0	0	0	0	0	0	0	0	0	0	0	0	0	0	0	0	0	0	0	0	0	0	0	0	0	0	0	0	0	0	0	0	0
4739	PF3D7_1415000	uracil-DNA glycosylase	UDG	ATGAATAATCCAACAATTCAGAAAACAATCGATCAATTTTTCAAAGTAAAAAGAAAAAGTAGTATCCTTAGTGGGGAGATAGAAAAAAAAAGAAAGAAAGTAATTTTAGAAGAAGTAGAAGAAAAATCGTTGGAAGGTAGTTTAAAAGAAGAAAATGTAAACATTTTGAAGACGAAAAAACTTATGAATAATGATGAGGATATAGAAAAGATGGGTACAATAAGTAATATTAGTATGAGTACTAGTACAATAGATAATGAAATAAATAATAATGTAAAACAAAATGTTTGTGAACAAGGATATATGGAAGAAATAAAGAAGTTAATGCATATAGAATGGTATGAGTTATTAAAAGATGAATTAAAAAAAAACTATTTTAAAAATATGTATTTAAAAATA…	MNNPTIQKTIDQFFKVKRKSSILSGEIEKKRKKVILEEVEEKSLEGSLKEENVNILKTKKLMNNDEDIEKMGTISNISMSTSTIDNEINNNVKQNVCEQGYMEEIKKLMHIEWYELLKDELKKNYFKNMYLKIKEERKTKVIYPPEQLVFNAFLKTPLSNIKVVIVGQDPYHQKDQAMGLCFSVPIGVKIPPSLKNILKEMKQKSNHGNLISWSEQGVFLLNTSLTVEENKPASHKNYGWETFTDTVINIINRQKEKIIFMLWGNFAIKKCKNIDINKHFILKAGHPSPLSIKHFENCNHFAKCNKILAQHNLTPIKWELPQ	322	0	null	no	GO_0006281, GO_0006284	GO_0006284	GO_0006281,GO_0006284,GO_0006284	0	0	0	0	0	0	0	0	0	0	0	0	0	0	0	0	0	0	0	0	0	0	0	0	0	0	0	0	0	0	0	0	0	0	0	0	0
5244	PF3D7_1467100	DNA-3-methyladenine glycosylase, putative	null	ATGGAAAAAATGAACGAATTCTCGAATAATAATAATAATAATAATAATGATGATGATGATAGAGGTTCACTAAAATTAAAACAATTACGTAATTCTATTAAGGGAAAGAAAAGAAAACATGATAGTATAACAAAAGACAATGATATAATAAATGCATCCAAGGTTATTATAAAAAAAAATGTTATGACGACACAACTGTTTGATGATATTAATAAATTGAGTTATGTATATTTCTTATTAAAATATTATTTTGATAATAATCCATTGAAAATATTAAATGAAAATTTCTATCTTAAAGATGATGTATTATATATTACAGAAATATTAATAGGTCATATTTTATGGGTTTTTGACGAGAAACAAAATAAATTATATGGTTCTAGGATTATTGAATTGGAA…	MEKMNEFSNNNNNNNNDDDDRGSLKLKQLRNSIKGKKRKHDSITKDNDIINASKVIIKKNVMTTQLFDDINKLSYVYFLLKYYFDNNPLKILNENFYLKDDVLYITEILIGHILWVFDEKQNKLYGSRIIELESYNGVNDKASHAYNNRKTNRNMSMFEKGGISYVYLCYGIHNCLNIVTNIQNIPDAILVRSTEPLYNIEYFLSNKFEKISQYLLSNSIFIHKNIKEQQKNNSTPKNKRNQQGNISNKDGNIINETNYLTKIDELINIFKMIKKKQLLKLCSGPGCVTKSQDITRQDDKQYFFVGTNIEKENKTNTINNNNNNKRNNCSNLQKNSKYFNNNDYIKKNNNKSNNIHSDNDCSIDISNCTKENKQTNHCKNEYIQDHVNYNELMEYYYFL…	501	0	null	no	GO_0006284	GO_0006284	GO_0006284,GO_0006284	0	0	0	0	0	0	0	0	0	0	0	0	0	0	0	0	0	0	0	0	0	0	0	0	0	0	0	0	0	0	0	0	0	0	0	0	0
167	PF3D7_0203300	ERCC1 nucleotide excision repair protein, putative	ERCC1	ATGGTAAGTGATAAGGAAGATCAATGTAACAAAATTAATAACAATGATAATGTTACTAGTCTCGAAAGCATTAATGAAGAAAAAAAAAATAATACAAATGAGGGGGGAGAAAGCTTCTTTGACAATAATGCTGAGCAATATTTAATTATATCATTAAGACAAAAACTGAATCCAGTTATAAAAAAAATAAAAAGAGTTCGTTATAAATTTAATAATATTATACCAGATTTTTTAGTAGGGAAAAATAATGCATGTCTTTTTATATCCATGAAATATCATCGTTTACGCTCAAATTATTTAAAAGCTAGAATAGAAACTTTATCAAATAAATATAATAACAGAATATTATTATGTCTAGTGGATATGGAAAATATTGAAAATTCTTTAGGAGAAATAAAT…	MVSDKEDQCNKINNNDNVTSLESINEEKKNNTNEGGESFFDNNAEQYLIISLRQKLNPVIKKIKRVRYKFNNIIPDFLVGKNNACLFISMKYHRLRSNYLKARIETLSNKYNNRILLCLVDMENIENSLGEINQLSFSFNMTLILCWSNEECARVIEDFRIYEKKISYIIKKKISSSNQEEKIHELLKKIRCIHTTDCITLTTKFKNFKNIIQAKKEDLISCSGLGIKKIQALMATFNDPFF	242	0	null	no	GO_0006281	GO_0006289	GO_0006281,GO_0006289	0	0	0	0	0	0	0	0	0	0	0	0	0	0	0	0	0	0	0	0	0	0	0	0	0	0	0	0	0	0	0	0	0	0	0	0	0
2577	PF3D7_1011700	DNA repair protein RAD23, putative	RAD23	ATGAAAATAAAAGTAAGAACACTACAAAACAACGAAGAGGAAATTAATGTAGACCCTGATGATAGTATACTTGATTTAAAAAAAAAAGTGGAAGTAGTTTTAGCAGACATGCCAAGTGATAAACAGAAATTAATATTCAGCGGGAAAATATTAAAAGATGAAGACAAAGCAACAGATATATTAAAAGATAATGATACAGTTATTGTAATGGTTACTAGAAGAATTATTAATAAAAATAATCAAAAGGAAGATATTAATAAAGAATCATTAAGTAAGATAGAAAATAATAATAATAATAATAATAACAAATCTGATGATAATATTAATGTAACTACATCAAATACAGAAGAACAAAAGGAGAATAAGGAAAATAAAAATGATAATACAAATGATAATATA…	MKIKVRTLQNNEEEINVDPDDSILDLKKKVEVVLADMPSDKQKLIFSGKILKDEDKATDILKDNDTVIVMVTRRIINKNNQKEDINKESLSKIENNNNNNNNKSDDNINVTTSNTEEQKENKENKNDNTNDNIYNSFNNAESMLLTGDKLKESIDNICAMGFEKEQVKKAMILAYNNPNRAIDYLTNGFPNENVNVNVNENINNESNFSNLLNSENNPLLEENSSHPLSSNEETFRNSTFFNAIRDMALSNPQRLPELLQMIGRTDPSFLEYIRQNQTEFLAALQNYGNNINDHEEHSDDNLDNADDENAIQNDSFLQDVGQQVLSDPNNENINIPITPLNENEMESIKKLESLGFPKHVALEAFIACDKNEEMAANYLFENMNDFTSE	389	0	null	no	GO_0006289, GO_0043161	GO_0006289	GO_0006289,GO_0043161,GO_0006289	0	0	0	0	0	0	0	0	0	0	0	0	0	0	0	0	0	0	0	0	0	0	0	0	0	0	0	0	0	0	0	0	0	0	0	0	0
194	PF3D7_0206000	DNA repair protein RAD2, putative	RAD2	ATGGGTGTTAAAGGTCTTTGGTCCATTGTATCTCCTGTAGGTGTTCGGGTTAATCCCGAGATTTTTACAGGGAAAAGAATAGCAATTGATGTTAGTATATGGTTATATGAACTGACCTATGCTAATAACGTGAAAGACTTACGAAATAAATCTTTTGATAACATGAGCATATTCAATGATTTGTGGATAGATTTTTCTGAAAATATATCTAGTGAAATAAAAACAGATAATATTAAAAAAGCACATCTTTATTTTTTTTTTTTAAGAATATGTAAATTATTGTATTATAATATAAGACCGATATTTATATTTGATGGCAACCCACCAGAATTAAAAAGGAAAACTATATTTCAAAGAAACATTAAGAAAAGGAATTATGAAGAAAAATTTAAAAAAACA…	MGVKGLWSIVSPVGVRVNPEIFTGKRIAIDVSIWLYELTYANNVKDLRNKSFDNMSIFNDLWIDFSENISSEIKTDNIKKAHLYFFFLRICKLLYYNIRPIFIFDGNPPELKRKTIFQRNIKKRNYEEKFKKTAEKLVYNYYQRTLLNSMKSKNKKNDNSNNIEDKTNTPNKTNTQNKSNTQNKSNTPNKINADISKSSLIQIYDDIKEKDKSLNSLVEHVGNVPVSVKDVLTICNDDLSKIKNKIFMITDFGPVLFLGEQDGDMGTVENINKLDNRNKDENNLSYSINYNKVQDVNNNNDDDKDKDKENINEVRRDQKNYVYKNKENINNIYLDDDDEKEDIQNKNGVYNNDDIDEQIIRKKHMARKKYYESIPKTFKGFLCMRRPVDIIDISNYNTE…	1516	0	null	no	GO_0006281	GO_0006295	GO_0006281,GO_0006295	0	0	0	0	0	0	0	0	0	0	0	0	0	0	0	0	0	0	0	0	0	0	0	0	0	0	0	0	0	0	0	0	0	0	0	0	0
1699	PF3D7_0726300	DNA mismatch repair protein PMS1, putative	PMS1	ATGAAGATAAAAAATATAGGGGAGGAGTCGATTCATAATATATGCAGCAGTCAGGTTATATTTACCCTGAGCAGTGTAGTAAAAGAATTGGTTGAGAATTCGATAGATGCAGATGCTAGTGAAATAAAAATAAAGCTAGTTGAGAGTGGAATAAAGTTAATAGAGGTTAATGATAATGGTGTTGGTATAAAGAAGATTAATTTTGAGAACATTTGTGCTCGTCATGCTACATCAAAAATAAAAGATTTTAATGATATACATAGTTCTTTAAATACTTTGGGTTTTCGAGGGGAAGCATTAAATTCATTATGTATGTTAAGTAATGTTAATATAACAACGAAGAATGAAGAAAATGATCATGCTTATTTATTAAAATTTGATAAACTTGGTAGACTTTAT…	MKIKNIGEESIHNICSSQVIFTLSSVVKELVENSIDADASEIKIKLVESGIKLIEVNDNGVGIKKINFENICARHATSKIKDFNDIHSSLNTLGFRGEALNSLCMLSNVNITTKNEENDHAYLLKFDKLGRLYHEEPIARLRGTTVSCENIFHNIPIRKKDFIKNIKTQVSDLLLLMQQYAIIYHNIKFVIYNIVTSKGCTKNMNLLITNGTDSIKKNFYSIYGKRNIGNLIEFNIDGNEWNIRGYISDSNSGRRDKDLQFYYINSRPIHILKNVNKLINTIYREFNSRLYPIIICNILSDTKNIDINVTPDKREVFFTFEQEMCEHMKTALVKLFTPKTSNLIDTQIDDYFLKANNILPNQIKSNIKLETHEHDDNHHHHKSTSPSQKHKGNEKPNDN…	1330	0	null	no	GO_0006298	GO_0006298	GO_0006298,GO_0006298	0	0	0	0	0	0	0	0	0	0	0	0	0	0	0	0	0	0	0	0	0	0	0	0	0	0	0	0	0	0	0	0	0	0	0	0	0
3038	PF3D7_1117800	DNA mismatch repair protein MLH	MLH	ATGATTAATGAGGATATAAATATTTGTGGAAATATTAATATGAAGGATAACGATAGAGATAATGATAATAATGATAAATATAATGATAAATATAATAATAATAATAATGATAATATACTTATGAATGATTCCAATGGAGATCGAAGAATAATTAAGCTAGCTGAAGAAGATATTAATCGTATAGCTGCTGGTGAGGTTATAATTCGTCCATGTAATGCTTTAAAAGAACTAGTAGAAAATAGTTTAGATGCAAATTCGAGTTCTATAAGTATACATTTAAATAAAGGAGGATTAAAATCATTACAAATTATAGATGATGGGGATGGTATACATAAAGAGGATTTAAGAATAGTATGTGAAAGATTTACAACTAGTAAAATTAGTAATCATAAAGATATA…	MINEDINICGNINMKDNDRDNDNNDKYNDKYNNNNNDNILMNDSNGDRRIIKLAEEDINRIAAGEVIIRPCNALKELVENSLDANSSSISIHLNKGGLKSLQIIDDGDGIHKEDLRIVCERFTTSKISNHKDIRNIKTFGFRGEALASISHVSYLTITSKKRNSPFCYTCNYKDGKPTQDEPTVCSGKNGTIIRFDDLFYNMPARLKTMNPNDEYNKCLEVLQKYAIHYPNVSFTCKKWLSNTVDLNTQKVGKGIGGYAGIYIIKKKRKERFDENNTTDGNLPCDNNMTCNNLPHDNNITCNNLPHDNNITCNNIPHDNNITCNNLPHDNNITCNNLQHDNNITCNNLPHDNNITCNNLPCDNNHTDKEATDNPDASSCMYNELEKKILEEEKYLDENY…	1016	0	null	no	GO_0006298	GO_0006298	GO_0006298,GO_0006298	0	0	0	0	0	0	0	0	0	0	0	0	0	0	0	0	0	0	0	0	0	0	0	0	0	0	0	0	0	0	0	0	0	0	0	0	0
4848	PF3D7_1427500	DNA mismatch repair protein MSH2, putative	MSH2-1	ATGGAAAATCATGAGGTAGAGGAAGTTAATGAGGATCAAATATTATGCTTATACATAGATACGAAAAAATATCAGAAAAGTTTAGGTGTATGTTTTTATAATTATTTAAAATATGAATTTTTAATGACAGAATTTATTGATAATGGACATTTTACAGCTTTAGAATCTTTATTCATACAGAAAAGACCACATAAGTGTTTTTTCAATAGTACTAATGATTTAGTTGATGATGAAAGACTTTTAAATTTGTTTAAAATTTGTAATGTTCAAGCTATTCCTTTGGAAAAGAAAAAGTATGATGCAACAAATTTAAAAGATGAATTAAAGCTAATTATATCTCATAATGATGATGTAAGAAATTATGATAAACATTTAGAATTAGAAAATGCATGTAAATGT…	MENHEVEEVNEDQILCLYIDTKKYQKSLGVCFYNYLKYEFLMTEFIDNGHFTALESLFIQKRPHKCFFNSTNDLVDDERLLNLFKICNVQAIPLEKKKYDATNLKDELKLIISHNDDVRNYDKHLELENACKCLMVLINYLKLKENQDIHNQCKINIHNMDLYMRLDKAAISALNILPNKKNIHSYNNNTSLLKFLDKCNTTIGSKKLVSWLTQPLTNVAEINKRLNIVEFFIKEDDARNVIFCNYLKRIPELDKLNHYLKEINQNNEIRVNSKYNEEMILKDIVKMYYSILDFKQIYFTLKPIQGKNKETIDEIIINPLRDILNKFSKLLDMIEITIDLEEVQENKVYLISTSFDNELEIIANEKNALMKKIKKHKDDVEKDIFADKYDRTYKRANRE…	811	0	null	no	GO_0006298	GO_0006298	GO_0006298,GO_0006298	0	0	0	0	0	0	0	0	0	0	0	0	0	0	0	0	0	0	0	0	0	0	0	0	0	0	0	0	0	0	0	0	0	0	0	0	0
2938	PF3D7_1107400	DNA repair protein RAD51	RAD51	ATGAAACAAGCAAATACAAAAGAAGATAAGTCGCAGAAAATTTCCAATAGTAGTACTATTGATGAAATAGAAGAAGAACAGTTATATACTGGACCTTTAAAAATAGAACAATTATTAGCAAAAGGTTTTGTAAAAAGAGATTTAGAATTACTTAAGGAGGGTGGATTACAAACTGTTGAATGTGTGGCATATGCTCCTATGCGTACGTTATGTGCTATTAAAGGTATAAGTGAACAGAAAGCAGAGAAATTAAAAAAGGCATGTAAAGAATTATGTAATTCAGGTTTTTGTAATGCTATAGATTATCACGACGCAAGACAAAATTTAATAAAATTTACCACAGGATCAAAACAATTAGATGCCTTATTAAAAGGTGGAATAGAAACAGGTGGTATTACG…	MKQANTKEDKSQKISNSSTIDEIEEEQLYTGPLKIEQLLAKGFVKRDLELLKEGGLQTVECVAYAPMRTLCAIKGISEQKAEKLKKACKELCNSGFCNAIDYHDARQNLIKFTTGSKQLDALLKGGIETGGITELFGEFRTGKSQLCHTLAITCQLPIEQSGGEGKCLWIDTEGTFRPERIVAIAKRYGLHPTDCLNNIAYAKAYNCDHQTELLIDASAMMADARFALLIVDSATALYRSEYIGRGELANRQSHLCRFLRGLQRIADIYGVAVIITNQVVAKVDAMSMFGGHEKIPIGGNIIAHASQTRLYLRKGRGESRICKIYDSPVLPEGEAVFAITEGGIADYEEK	350	0	null	no	GO_0006259, GO_0006281, GO_0000724, GO_1990426	GO_0006310, GO_0006281	GO_0006259,GO_0006281,GO_0000724,GO_1990426,GO_0006310,GO_0006281	0	0	0	0	0	0	0	0	0	0	0	0	0	0	0	0	0	0	0	0	0	0	0	0	0	0	0	0	0	0	0	0	0	0	0	0	0
1692	PF3D7_0725000	exonuclease I, putative	null	ATGGGGATATCCAACTTGCTACAATTTTTGAAGCCCATAATAAAGAACTCACATATCAGCAAATATAAAAATGAAGTCGTTGGTGTCGATATAATGTGCTGGATACACCGTGGGTTAATTAGTTGTGCTTATGATATCGTGACCGATCAATATAATGATAGTTATTTAAATTTCATTGAGAAAATGTTAGTACCAATATATAATCATAACATAAAGGTTGTATTTGTTTTTGATGGAGAGGAATTACCTGAGAAAAAAAAAGAAAATATGATAAGAAAGAATAGAAGAGAAAAAGCAAAAATGGAATTACAAGAAATAATTAGCAAAGTAAAAAATCCAAGAACTAATGAAATGGTTTTAAAGAAATGTATACAAGCTATAAGTGTTTCTAAAGAAATA…	MGISNLLQFLKPIIKNSHISKYKNEVVGVDIMCWIHRGLISCAYDIVTDQYNDSYLNFIEKMLVPIYNHNIKVVFVFDGEELPEKKKENMIRKNRREKAKMELQEIISKVKNPRTNEMVLKKCIQAISVSKEIIDSVKEFCRKKNIDYIISPYEADAQLSYLCRMGFISCAISEDSDLLVYGCPRVLYKLKNTGECNEISLMPINDLIDWNVINKIKNPLSNSYNEFYITPIKKLQNSDDYDSDISLDEETSVECINNDSYVQNNNEFINISKKTKSIVNSNNNNKKKKKKKNKNKKKTNKKKNMQKSKCDNIIKQYIQQFDWPEELFKLQYFNIDMFLTMCVLSGCDYSNDFHITGMGIKTAYNLIFQHKNIENIFHFLISNDRWRNKIPENLNTFDK…	1347	0	null	no	GO_0006281	GO_0006310, GO_0006298	GO_0006281,GO_0006310,GO_0006298	0	0	0	0	0	0	0	0	0	0	0	0	0	0	0	0	0	0	0	0	0	0	0	0	0	0	0	0	0	0	0	0	0	0	0	0	0
3394	PF3D7_1203700	nucleosome assembly protein	NAPL	ATGGCAGCTAATGAAGGAAATCAACCAATTCCACCTGAAGAAGAAAAGGAAATATCATCACTTTTAGAGAGCATTAAAATTGACGATGATAAAATGACCGATTTGACTGAAGAACAAAAGGAAACGTTAAAGAAGTTGAAACTTTATCAGAAAGAGTACTACGATTACGAATCTAAATTTGAATATGAGTTATTTTTGTTAAGGCAGAAATATCACGATTTATATGGTCCTATTTATGACAAGAGAAGAGAAGCTTTAGTAGGTAATGGTGAAGCAAAGATTGGTACACCTAATTTGCCAGAGTTTTGGTTAAGAGCATTAAGGAATAATAACACAGTGAGTCATGTTATTGAAGATCATGATGAAGAGATATTAGTATATTTGAATGATATAAGATGT…	MAANEGNQPIPPEEEKEISSLLESIKIDDDKMTDLTEEQKETLKKLKLYQKEYYDYESKFEYELFLLRQKYHDLYGPIYDKRREALVGNGEAKIGTPNLPEFWLRALRNNNTVSHVIEDHDEEILVYLNDIRCDYIKKNKEKKEGFILSFYFATNPFFSNSVLTKTYHMKCVDCDNEPVLLHTEATVIDWYDNKNILKKNVVKKQHNKNSREVKTVQQTVNRDSFFHFFTSHKVPNSNVIKQLSKHEVAQLEMIIEGDYEVALTIKERIIPYAVDYYLGIIIESESNSIVSDVDSSYSSSENNSNYNSYESNNSAYNDENSNVDTNEYDDNEEEEEGAKSNEDPLTS	347	0	null	no	GO_0006334	GO_0006334	GO_0006334,GO_0006334	0	0	0	0	0	0	0	0	0	0	0	0	0	0	0	0	0	0	0	0	0	0	0	0	0	0	0	0	0	0	0	0	0	0	0	0	0
3113	PF3D7_1125300	DNA-directed RNA polymerase	mtRNAP	ATGTTTGTATGTAAAAAATGTTCAAGATACGTAATTAAGAAGATTTTCTATACGTTTATATGTGAGAGCAAATATCAGCTTCTGTTTTTAAGAAAAGGAAATGATTATAAAAATATTTTTTTTTTGGAGAAAGGATATATTAGTACTCATGTAAGAGGTGACAAAAAAGAAAGAACACAAAAAAAAAAAAATGATTTGGATATAAAAAGGTTGTTTTTGGATAAGCCCAGTACACCAAACATAAAAGATGAATATGAAAAGAAAACAAATGATAACAACAACATGGAAGAGTATAACATATGTAATAATAATATTATTACTAATAATAATAAAATAAAAAATTCTTCACATATGAATACTTTTAATAGTAATAGGAAAAAGGTATGTGTGAAGGATAAT…	MFVCKKCSRYVIKKIFYTFICESKYQLLFLRKGNDYKNIFFLEKGYISTHVRGDKKERTQKKKNDLDIKRLFLDKPSTPNIKDEYEKKTNDNNNMEEYNICNNNIITNNNKIKNSSHMNTFNSNRKKVCVKDNINNNTINNNYEEQKENKEEYINTPKAKNNLYNLPYKNKDTHIIDKKKLDEQVVKELHNLIISIKKIDKDKKENIIKYINTLNKKYVKNINKNIIVFFENLDIYMSVNGLLICDIGGEEIFNYINKIKLTNNIDIKKETYNDDIEKHNVNTNERFLHMDDVTKEDNININNMFDINYIKEKKKRIYGDNIYPIVVKSEEKEEVVPKKKKKNSNNIIVHNNNIINNKCGDYNIINCTNDLGEKTKNHQTNYSNNPKFDYQYNEEKEKE…	1531	0	null	no	GO_0006351	GO_0006351	GO_0006351,GO_0006351	0	0	0	0	0	0	0	0	0	0	0	0	0	0	0	0	0	0	0	0	0	0	0	0	0	0	0	0	0	0	0	0	0	0	0	0	0
4741	PF3D7_1415200	DNA-directed RNA polymerases I and III subunit RPAC2, putative	null	ATGGAAGAAAAAAAGTACTACGAAAATTTGAAAAATTTGACTCACGCAACCTTTTGCTTTGAGAATGAAGATCATACATTAGGAAATTGTTTGCGTTGTATTTTGTTACAAAAAGAAGGTGTGGAATTTGCAGGATATACAGTACCTCATCCAACTCAACCTGAAATTAATGTTAGAATTCAGACAACAGGAAAACCAGCTATAGACATTTTAAAAGAATCGCTAGATGATTTAGGAAATATGTGTGATATAATGTTGAACAAATTTAATGAGGCATTAAAACAGTCATGA	MEEKKYYENLKNLTHATFCFENEDHTLGNCLRCILLQKEGVEFAGYTVPHPTQPEINVRIQTTGKPAIDILKESLDDLGNMCDIMLNKFNEALKQS	96	0	null	no	GO_0006351	GO_0006351	GO_0006351,GO_0006351	0	0	0	0	0	0	0	0	0	0	0	0	0	0	0	0	0	0	0	0	0	0	0	0	0	0	0	0	0	0	0	0	0	0	0	0	0
5300	PF3D7_1472700	DNA-directed RNA polymerase, alpha subunit, putative	null	ATGCCGTTTCTCGTCATTATTTCCATATGGTTACATACAATAATAGTAATATATAAATGTGTACATATTTTAAAATCTTCATATATTCCCAATGCTGAAAAATTGTTGATGTTTGAAAGGAAAAATAAAAGAGGAAAGATAAAATTGATTTTAAATAAAAATAAAGAAGAAAAAAGTATAAGAAGAAAATCATTAAAGAAATATATTGTTTATTCTATTAACAATGATAAAGAGTTTATACCGATAAATGATAATTATAAAATATTTCAAAAAAGAAATTTTATTAAAAAATATCATGTGAAGGATGAAGAAATAAAAGAATACATTGAAGAAATAAAGAAAAATAGAGCTAGTGGTTATGAACCTAAATTTCCTGAGGAGACCTTTCGAACGCCTGAT…	MPFLVIISIWLHTIIVIYKCVHILKSSYIPNAEKLLMFERKNKRGKIKLILNKNKEEKSIRRKSLKKYIVYSINNDKEFIPINDNYKIFQKRNFIKKYHVKDEEIKEYIEEIKKNRASGYEPKFPEETFRTPDGLTNIILDYKYKNDNLRIHNYYFFFLYFLKKLGDEEQRKIKLRKRMEGKNDEYGDSINDDVDNRMINVQEFLFLKKKGFFEGELYTWKNWVLLNRGEWRDTIVYGDEVDNNNNNNNSNSSSSSSSSSSSSSSSSSSSSSSSSSSSSSSSSNRSSNFCGDDNIYNVYNNYDDESYDIKTLRPLVEPKMKRMPIEYWGSFRAIDFNVNHYPIYKKLFDYFNKVNVNENDERGKFYPFLFFPRFGVGRDRSGLGYGDAQYFGNYGDFYE…	861	0	HMM: MPFLVIISIWLHTI, NN: MPFLVIISIWLHTIIVIYKCVHILKSS	yes	GO_0006351	GO_0006351	GO_0006351,GO_0006351	0	0	0	0	0	0	0	0	0	0	0	0	0	0	0	0	0	0	0	0	0	0	0	0	0	0	0	0	0	0	0	0	0	0	0	0	0
1250	PF3D7_0610900	transcription elongation factor SPT5, putative	SPT5	ATGGCTGAAAAGGAAAAAGAACAAAATTTCACTAAGAATATTTTTAGTGACGACGAAAGTGATGTTGACAAAGAAATGATTAAAAACAATAAAAGGAAAAACGATAATAATAATGATGATATAAGTGAACATGATGCAAAAAATATAGAAATGTCAAGGAAAAGAAAAAAAATAAATAATACAAACACAAATATAAATAAGGAAGGGCAAGAAGATAATGAACATAACCATTTTGATGATAATAATGATGAGGAGGAACATGAAGAAGAAGCTGAAGAAGATATTGAAGGACGTGAAGAAGAAGATGATGATGATGATGATGGAGATGACGGCGAAGAAGAAGATTATGAAGATGAAGAAGATGAAAATTTATTATACGAAAATAGTACTTATAATAAT…	MAEKEKEQNFTKNIFSDDESDVDKEMIKNNKRKNDNNNDDISEHDAKNIEMSRKRKKINNTNTNINKEGQEDNEHNHFDDNNDEEEHEEEAEEDIEGREEEDDDDDDGDDGEEEDYEDEEDENLLYENSTYNNNKDMIESGSKKRRIGKNKYLSTFLDTEAQVGDDDEEEEYESSYIDEFEEAKRLEKKKLYEQKLKSGTNHLAQAINKLSKRYENEKEVKEDDILTDGETLTDGEILGDDYSDERRERLQTIDSPKMWLIKLFKNNVERNLAIGIYHKFMKLKDNDFNIKGIYVSDNLKGYIYIEADSLYMLKKFLLGFKFINLNEISIVPIQELTSIFTMCHSKINIPKVNEYVRIKRGLYINDIGQIYEIHEKGIYAIVRLIPRITYEHFMNAKKS…	1280	0	null	no	GO_0032784, GO_0006357, GO_0006412	GO_0006351	GO_0032784,GO_0006357,GO_0006412,GO_0006351	0	0	0	0	0	0	0	0	0	0	0	0	0	0	0	0	0	0	0	0	0	0	0	0	0	0	0	0	0	0	0	0	0	0	0	0	0
3491	PF3D7_1213700	DNA-directed RNA polymerases I, II, and III subunit RPABC3, putative	RPB8	ATGGCATCAAACATTTTATTTGAAGATCGCTTTGTTATAAGTAGTGTAGATAATTCAAAATTTGAAAAAGTGAGTAGAATTAAAGCAAAAAGTACAGGTTATGATGCAGAGTTAATACTTGATGTTCATTCTGAATTGTTCAAGGTTGAAGAAAAGAAGGCTATTTATTTAGCACTTCAAGATAAATTGTTAAATCGAAATGATGAAAAGGGTTGGGAACAAAATGAAAATGTTCCATTAAATAATATTGAATATATTATGAGTGGAAGAATTTTTAAATTTGAGGAATTATCATCTGAAAGAAGGACTGTATATGCTTCCTTTGGAGGATTAATGATGGCACTGACTACTGATAAACAATTCATTGGAGATTTGGAAATCGATATGAAAATATATTTA…	MASNILFEDRFVISSVDNSKFEKVSRIKAKSTGYDAELILDVHSELFKVEEKKAIYLALQDKLLNRNDEKGWEQNENVPLNNIEYIMSGRIFKFEELSSERRTVYASFGGLMMALTTDKQFIGDLEIDMKIYLLTKNIDIERTRE	145	0	null	no	GO_0006351	GO_0006352	GO_0006351,GO_0006352	0	0	0	0	0	0	0	0	0	0	0	0	0	0	0	0	0	0	0	0	0	0	0	0	0	0	0	0	0	0	0	0	0	0	0	0	0
632	PF3D7_0404100	AP2 domain transcription factor AP2-SP2, putative	AP2-SP2	ATGATGAATAAAGAAAAATATGTAGACATTTTAAAAGAGGATAAACCAAGTACTCTATATATTGAAAAAAATATTATTAAAAACAACCATGTCATATTAAATAAAGATAGGAATATTATAAAAACTGTTGATAATAATTTTGAGTATAAGAATGAGTGTTACCAGAAAGATTATAAAAATGATATAATAGATAAAGGAAATGTTTATGATAAATATATTAATAATAATAATAATAATAATGAAGGTACAAAAAAAAATTGTTTGAGATATGATAGATTTCATATTTATGATGATAAAATAAAAAACATCGATGATATAAATGAAACTATAAAAATGAAAGAAGAAAAAATAATAATTCCATTACATACATTTGACGAAAAAAAAACTAATAATATGGAT…	MMNKEKYVDILKEDKPSTLYIEKNIIKNNHVILNKDRNIIKTVDNNFEYKNECYQKDYKNDIIDKGNVYDKYINNNNNNNEGTKKNCLRYDRFHIYDDKIKNIDDINETIKMKEEKIIIPLHTFDEKKTNNMDLKISNNDIYNNMNPCNDNIKNDILEVNIEKEKRNVMNEKGNNFVNNKMGIDNIEGEHKDGIISPNNYIKLKNINENDKINNNDRINNNDKINNNDNINNKKKSSKRTGIPLNERKYYRILAKQMKKIQGLTFDHNQIRWIAYWKNENNKQIQKHFPVCKFGFHEARQLALEFRNLKINDKNKNSNQKNKNINNNNNMNNNNVNNNNVNNNNVNNNNGNYIKKKDKNKKYVINIKNQYNNNGKQYINHYPQNININHMNFNMNNLNM…	2271	0	null	no	GO_0006355	GO_0006355	GO_0006355,GO_0006355	0	0	0	0	0	0	0	0	0	0	0	0	0	0	0	0	0	0	0	0	0	0	0	0	0	0	0	0	0	0	0	0	0	0	0	0	0
1825	PF3D7_0807000	YEATS domain-containing protein, putative	null	ATGGAGAATCGAATGCAAAACGTTAAGTTAATAAAACCTTTGGTGGTTGGAACGTACGCATTTTTATTATCTCCTCAGGAAAAAAAAAAATATGGTAATATGACACATAAATGGACATGCTTAGTAAGATGTCCTGAATCTACGGACATTTCTCTTATTGTTAGTAAAGTAGTTTTTGAATTAGATCCTTCCTTTATGTACCCTAAAAGAGTGTATACACAACCACCATATGAAGTGAATGAAATAGGATGGGGTGAATTTTATTTACAAGTTAAAATACATTTTGTAGATTTAACATTATCCCCAATAAGTATTGTGCACTTTGTCAAGCTCAATACTGATTCTGACCCCAATAACATCCCACCTTGTGTAGTTAATGAGACATATGAAGAAATTATT…	MENRMQNVKLIKPLVVGTYAFLLSPQEKKKYGNMTHKWTCLVRCPESTDISLIVSKVVFELDPSFMYPKRVYTQPPYEVNEIGWGEFYLQVKIHFVDLTLSPISIVHFVKLNTDSDPNNIPPCVVNETYEEIIFKNPTVHFYNKFLQCNNTKIAPHKFQEHFIKYDFKEDSYTKKYLQFQSEVQQEICDLMSEATLLSKDINDVQQKYFTMKSEMGVSSDEN	222	0	null	no	GO_0006355	GO_0006355	GO_0006355,GO_0006355	0	0	0	0	0	0	0	0	0	0	0	0	0	0	0	0	0	0	0	0	0	0	0	0	0	0	0	0	0	0	0	0	0	0	0	0	0
3738	PF3D7_1239200	AP2 domain transcription factor, putative	ApiAP2	ATGAGTGATAAAGGTGAAGGAGATAAGGATAATATGAACAAAAATGGTAATGTGTATGACATGATGGATAATGAAAAAAATGAAGAGGTAAATTATATAATAAATGAAGTGGACTCTTCTAATGATTGTAAAAATGAACTTATCAAAATGAACTATGATAATAATAATAATGATAATAATAATAATAATAATAATAATAATAATGATATATCGTATAATGTGTTAAATTCCAATAGTGTTGATACAAAAAATATGGAGAATAGTTGTAAGAATTATGTATATGATAAAGATATTGAAAATAGAGATACTTATGATAATAGTAATAATAAGTCAAATAAATCTGATGATGTAGATAATAAGACAGGTGATATATCGATGAATAAAAATAAACTTGTAAAC…	MSDKGEGDKDNMNKNGNVYDMMDNEKNEEVNYIINEVDSSNDCKNELIKMNYDNNNNDNNNNNNNNNNDISYNVLNSNSVDTKNMENSCKNYVYDKDIENRDTYDNSNNKSNKSDDVDNKTGDISMNKNKLVNTNIYNSEENIYPCTYNTVVENNAYLKNIDIINTIENVEDNNMKNDVCNENNNIINNLYVDNDNWEKKNYVGLTEKLNCLKLEKTNEILEFNKTLDTSKDTQDINVVNEKLSVESNKNNVISNMNNIDSIDNINKMDNIDCIDNMNNIEKQSRKRKKNKLSDKKNLLNNEEYDNKENYDNLHVGNNYINTKDEINKVIQNINLLKALNTNDQKVNELNMDILNKSNEHNDNNEISKQLLDNIILLNSLSKYMNKDDINKQAKEKMKN…	2577	0	null	no	GO_0006355	GO_0006355	GO_0006355,GO_0006355	0	0	0	0	0	0	0	0	0	0	0	0	0	0	0	0	0	0	0	0	0	0	0	0	0	0	0	0	0	0	0	0	0	0	0	0	0
923	PF3D7_0509400	RNA polymerase I	RNAPI	ATGTACGATATAAATAAGTCAATATGTGCTGAGATAAAAAGTGCGGAACTTGATGTATTAAACAGTGGGGAGTTGAGAAGAATATCTATGGGTAAATACGAAAATGAGAAATATGAATATGAAAAAACTCATAAAAGTGGAGTTGTTACAAAAATGTATTATGACCCGAAATATGGTACTATTGATCATAATCAAATATGTTCAGTATGTTTTGAAAGGCACGAGAATTGTACAGGTCATATTGGTCATATTGAATTTGTTCTTCCGTTATTTAATCCATTATTTTATAAAGAATTACAAGAATTATTAAATTTGATTTGTTATCATTGTTATAATTTTTGTTGTTCTGAGGATGTCATTTTTTTATTAAAACATATTTTTCAATTGAAATCTTTGAAT…	MYDINKSICAEIKSAELDVLNSGELRRISMGKYENEKYEYEKTHKSGVVTKMYYDPKYGTIDHNQICSVCFERHENCTGHIGHIEFVLPLFNPLFYKELQELLNLICYHCYNFCCSEDVIFLLKHIFQLKSLNQIESTNKIKYKKNCDYEYIIDQVEKLYKKICKDSNISLDDIVEAIYDDYENVHEDKDGNFDESVDLLDSLEKIKDEPDEKNKNNNNKNNNNNNNNNNNNYNNDVDIDVDNNNNNVDINVDNNNNYFNSDLVDLAPNEEIYEEETDAGRSDDNNKENKPDYNKLKERIKKYKFDANKLAFQSNYNYEEYLILSKTIKLHMKKSSKCCFCKFQRNISAKVSQRRDTINFIGVHTNNPFFKKYMPKKKQKKNEKDDQEDVDDLENMNNI…	2914	0	null	no	GO_0006351	GO_0006360	GO_0006351,GO_0006360	0	0	0	0	0	0	0	0	0	0	0	0	0	0	0	0	0	0	0	0	0	0	0	0	0	0	0	0	0	0	0	0	0	0	0	0	0
3206	PF3D7_1134700	DNA-directed RNA polymerase I subunit RPA2, putative	RPA2	ATGGCAGAGGAGGTAAATAGAAATATTAAAAGGACGTCTGAATTGATTAATAATAATAAAGTAGATAAAAGTTTTTTAAAAAATATCAACCTACAAATTACGGATGGAGAAATAAAGTTACATTTAAAAATTATTGAAGCCTTATATCCTAATATGAAATTAAAAGTCGATAAATTAATAAATGGAAGTTATAATATTTTTACCAAATTCTTAGTACAATCACATATAGATGATTTTAACTCCTTTATAAATGTTTATATAAAAAATATTGCTGAAAATATACCAATAATGGAATTTTCACCTCAGCAAAATAATTATTCTCTTTTAAATATGAATAAAAACAATTCTGAATCTGTAAAATTTTTCGTGAGTGATATACAAATAAAAAATCCAATGATA…	MAEEVNRNIKRTSELINNNKVDKSFLKNINLQITDGEIKLHLKIIEALYPNMKLKVDKLINGSYNIFTKFLVQSHIDDFNSFINVYIKNIAENIPIMEFSPQQNNYSLLNMNKNNSESVKFFVSDIQIKNPMIKNDKGEYRADYPYLCKLSARTYEGELLIKINRQYKDEIASTTICAGHIPIMIMSNLCNLSNLNKKELAQKGEDQSLLGGFFVVSGRLKVIRYVIHPKYNTLLLNADNKIHINCLLNDNTVVINFLTLTRNNSYVYGFRFQNAVCSLPFHLLLMILSPIKKKSYIFNKIKLGVENENAIKYIELFINSIFLKDTFNEKELFEKYNLSYLGRIAYLRRGIFKYNLNCYEKKAKDILKYCILPHIKNNSEKFETMCFMFKKLIYSNFKL…	1517	0	null	no	GO_0006351	GO_0006360	GO_0006351,GO_0006360	0	0	0	0	0	0	0	0	0	0	0	0	0	0	0	0	0	0	0	0	0	0	0	0	0	0	0	0	0	0	0	0	0	0	0	0	0
3979	PF3D7_1309600	ribosomal RNA methyltransferase, putative	null	ATGATAACAGATTTATTATTTAAATCACAAATTATATATAATAAGAAAGATATATTATGTGCTAGATACATTTTATTTTATCAACACATATGTAAGAGAGGTTATAAAGAAGCTGCTCCTAAGGTTTTTAATAAAAAAAGTAGTCACACAAGTAGATGGATTCAAAGACAGATAAGTGACCGTTATGTATTACGAGCGAAGAATGATAATTATAGAAGTAGGGCGGCATATAAGTTAATTGAATTGGATAATAAATATTTGTTCTTAAAAAAAAATAAAATAATTTTAGATATTGGATGTTATCCAGGTAGTTGGTGTCAAGTTATATTAGAGCGTACTAAAAATTATAAAAATAAAATTATAGGAATAGATAAGAAGATAATGGATCCTATACCTAAC…	MITDLLFKSQIIYNKKDILCARYILFYQHICKRGYKEAAPKVFNKKSSHTSRWIQRQISDRYVLRAKNDNYRSRAAYKLIELDNKYLFLKKNKIILDIGCYPGSWCQVILERTKNYKNKIIGIDKKIMDPIPNVYFIQGEIGKDNMNNIKNINYIDNMNNNSVDYKLKEILQDKKIDIILSDAAVPCIGNKIDDHLNSCELTLSITHFMEQYINIGGTYIVKMYLGSQTNNLKTYLKGMFQLVHTTKPKASRNESREIYLVCKNFLGRKKITEDVQIKGSFSSKEGYY	288	0	null	no	GO_0001510, GO_0032259	GO_0006364	GO_0001510,GO_0032259,GO_0006364	0	0	0	0	0	0	0	0	0	0	0	0	0	0	0	0	0	0	0	0	0	0	0	0	0	0	0	0	0	0	0	0	0	0	0	0	0
4656	PF3D7_1407100	rRNA 2'-O-methyltransferase fibrillarin, putative	NOP1	ATGACAGACTCTTTTAGGGGTGGATCTGGGAATTTTAAGAGGAACAGCAATAATTTTGGGAAGGGAAATAATAACGCTGTACGTAAAGGAAGTAACTGGAAAGGCTTCAATGGTGGTCGAGGTGGAGGAGGTGGAGGAAGAGGCGGAGGAGGAGGTGGACGAGGCGGAGGAGGTGGAGGAAGAGGCGGAGGAGGAGGAAGAGGTGGTGGTGGAGGAAGAGGAAATAAAGATAGAAAGAGTTTTAAAAAGGATAACAAATCTGGAAAAGTAATTGTAGTACCTCATAGATTTCCAGGTGTTTATTTATTAAAAGGAAAATCAGATATATTAGTTACCAAAAATTTAGTGCCTGGAGAAAGTGTATATGGTGAAAAAAGATATGAAGTTATGACAGAAGAT…	MTDSFRGGSGNFKRNSNNFGKGNNNAVRKGSNWKGFNGGRGGGGGGRGGGGGGRGGGGGGRGGGGGRGGGGGRGNKDRKSFKKDNKSGKVIVVPHRFPGVYLLKGKSDILVTKNLVPGESVYGEKRYEVMTEDEKIEYRVWNPFRSKLGACLMGGVGNMPIKPGSKVLYLGAANGTSVSHVSDMVGDEGVVYAVEFSHRSGRDLTNMSKKRSNIVPIVEDARQPTKYRMLVDMVDVVFADVAQPDQARIVAMNAHMFLKTGGWFIISIKANCVDSTAKPEVVFASEMEKLKKENCKPKEKLTLEPFHRHHAIVLGMYR	318	0	null	no	GO_0006364, GO_0008033	GO_0006364	GO_0006364,GO_0008033,GO_0006364	0	0	0	0	0	0	0	0	0	0	0	0	0	0	0	0	0	0	0	0	0	0	0	0	0	0	0	0	0	0	0	0	0	0	0	0	0
1041	PF3D7_0521500	ribosomal large subunit pseudouridylate synthase, putative	null	ATGATTTTTAGAAGATTAATATATCATACGTCGAAACGAAGTAAGGAAAAAAATACTTTTTTTGCATTTTTAAAAAAGCAAAAATATAAATCTGTTCGCAATTATAATATGAAAGAAGAAAAGAAAGAATATGAAGAGTGCCAAAATCATGTTACAACACCCTTATACAAATCATATAAAGGTCACGATTTAAAAATAATATATGAGAATGATTATTTTTTAGTTCTTAATAAACCATATGATATCAAATTAGAGAAAGGAAAACTCGATGACATATATCCATCTGTAGAGACGTTACTTTATCAAAAAAGGAAATTGGATGTATTCAGGATATGTGGACAACTTGATTATGCGACCAGCGGTCTTCTTATTGTAGCCAAAGATAAGCTAAGCTGCAAT…	MIFRRLIYHTSKRSKEKNTFFAFLKKQKYKSVRNYNMKEEKKEYEECQNHVTTPLYKSYKGHDLKIIYENDYFLVLNKPYDIKLEKGKLDDIYPSVETLLYQKRKLDVFRICGQLDYATSGLLIVAKDKLSCNILNYNIESKNISKIYLAILYGHLPLDILHINTPISKNKEGFKMKLCYNYNDYYDNGKYCYSLIYPYKHSYINNEKVTLCEMRTVTGRRHQLRLHSLSLGSSIVGDETYFDDMITNKYKIEYNNVNGKNENEKNIQIKENDNNNNNYDNRYDGKLLCNEKKKKIHVERMMLHCWIILKNKELNNLKKSENINNLEKQIFDQDYIICEDELSQFANENSRTFEDCVLKNNDLINTSFINYNLKGIKKNIKNIDRKLKNNLNNKRDITR…	487	0	null	no	GO_0009451, GO_0001522	GO_0006364	GO_0009451,GO_0001522,GO_0006364	0	0	0	0	0	0	0	0	0	0	0	0	0	0	0	0	0	0	0	0	0	0	0	0	0	0	0	0	0	0	0	0	0	0	0	0	0
4417	PF3D7_1354300	large subunit rRNA methyltransferase, putative	null	ATGGGGAAGAAAAAAAAAGTCGGTAAGGAGAGAATTGATAAGTATTACAAGCTAGCCAAAACGGCAGGATATCGTGCTAGATCCGCTTTTAAGTTAATTCAAATAGCTCAAAAGTTCAACGTTTTCAAAAATGCAAATATATTGATTGATTTATGTGCTGCTCCTGGAGGGTGGTTACAAGTAGCATATAAAAACATGAGTAAACAAAGTACTATCATTGGTGTGGATTTAGTTCCAATTAGAAAAATTGATGATAACGTTATAACGATAAAGAGTGACATTACAACAAGTGATTGTATTAAGAAAATAAAGAATATCATAAAAATGGATAAGGCAGATGTTATATTAAATGATGGTGCCCCAAATGTAGGTACAACATACTCTTATGATAGTTTTAAT…	MGKKKKVGKERIDKYYKLAKTAGYRARSAFKLIQIAQKFNVFKNANILIDLCAAPGGWLQVAYKNMSKQSTIIGVDLVPIRKIDDNVITIKSDITTSDCIKKIKNIIKMDKADVILNDGAPNVGTTYSYDSFNQNVLVLNSIKIAYIFLKKNGIFITKVFRNEEYISLIWVLEKLFGDVKHIKPRSSREISSEIYLVGLNFLGKKVDKKLFDYTYIFSDQFKKNSNKSSLLETKQESYLDNNENYFSDEESNDEEKVGEKIDKKKKKGLSTILKEKKKKNRQGYDVGDDYRATDICTFIKSDNYVDLLIKNNKFTFDKNYKNNSDPMIKTIYECIYKNECTTKEIFFLCNDLKVLGKSDLYNLIKWRYKIKKSVLNQTSKKNNLDFDNHDVEQTTQELS…	1019	0	null	no	GO_0032259, GO_0006364	GO_0006364	GO_0032259,GO_0006364,GO_0006364	0	0	0	0	0	0	0	0	0	0	0	0	0	0	0	0	0	0	0	0	0	0	0	0	0	0	0	0	0	0	0	0	0	0	0	0	0
3783	PF3D7_1244200	RNA polymerase II transcription factor B subunit 2, putative	TFB2	ATGGTTAAAATAAGAAAAAATGTTGAAAATATGGAATTATACGATTACATGAAGGAGCTTAATGAAAATGTGTGGTGTTATTTTTTTGATGATTCTTTAGCACATGAAACAATATATCATTCCCTTAACGAATTAGAACAAATAATTATTTCAAGATTATTATTTATTCAACAAGTAGTTTCAGAAAGAGCTATGAGATTATGGATAAATCCAAATTATTTAAAAAAGTTAAGTGAAAGTATAAAAAATTTAGTAGAAGCAAAAATATTAGTTGAAAGTGATATGAAAAAAGATAATTATAATCAATATAAAATTAATGAAAATTTTAGAATAACCTTATTAAATAAAATTTATAAAACAAATACCAATAATATTTTTATTTTTAATAATAATATTAAA…	MVKIRKNVENMELYDYMKELNENVWCYFFDDSLAHETIYHSLNELEQIIISRLLFIQQVVSERAMRLWINPNYLKKLSESIKNLVEAKILVESDMKKDNYNQYKINENFRITLLNKIYKTNTNNIFIFNNNIKEQLEREKNLYEQNLFPHKEEIFGYAQTKWNNLLHFIASPNFNSVNNYFNSNINNDDPNKYTAYDMARRKRVSKDGGPDMGRKSLDKMASRRSYNRRRKKKKYSDDEDEFDEEEYEGEDDDNSGDDDDDDDDNDDDDDDDDDNDDDDNDDDDNDDDDNDDDSGDDNDDDNDDDNDDDYTNDDNNIYFNDKANSHLLVKHQYDNHQLNNSTAYVENPSDDYTYKKEDDNKTEQRKSVHFNSDIYEKAYNNLYTQQGDSNNINEMEYYM…	945	0	null	no	GO_0006289	GO_0006366	GO_0006289,GO_0006366	0	0	0	0	0	0	0	0	0	0	0	0	0	0	0	0	0	0	0	0	0	0	0	0	0	0	0	0	0	0	0	0	0	0	0	0	0
95	PF3D7_0110400	DNA-directed RNA polymerase II subunit RPB9, putative	RPB9	ATGGCGGAGGTACGCTTTTGTGAAGAATGTAATAATATTTTATATGCGAAAAGTGATAGGAAAAGTAAAAAGTTGATATATGTTTGTAGGAGCTGTGAGTATATATCTCTGAAGCCAAATGAAAATAATAATATTGTGGCAAGGATAAATTATAATTATGATAGAAAAGAAGATATATATATCCACCCCGAAACCAAAAACGATCCAGCCTTAGGACGAGTAAGAGATTGGGTCTGTAAACAATGTGGAAATAATGAAGCGGTATTTTTACAGCTAGCTGAAAAGATAAGTTATAATCCTATGGCATTAATATATGTTTGTACAAATAAACATTGCCATTATTGGGAAAAAGAAGCTCAACAAATTAATGATGATAATTATTTTAATAGTGAAAAATCC…	MAEVRFCEECNNILYAKSDRKSKKLIYVCRSCEYISLKPNENNNIVARINYNYDRKEDIYIHPETKNDPALGRVRDWVCKQCGNNEAVFLQLAEKISYNPMALIYVCTNKHCHYWEKEAQQINDDNYFNSEKSSDISEDQDLLNNNFFLKSEKDNFVLSNHDDGYIKKNKKAWRTIKEEDDKDDDNDDDEEEEKKKNKQEEEEGNKLQEELYKILNLNEKKSNDKLQNEVQSEGENDYDINVEEYFCEE	249	0	null	no	GO_0006351	GO_0006366	GO_0006351,GO_0006366	0	0	0	0	0	0	0	0	0	0	0	0	0	0	0	0	0	0	0	0	0	0	0	0	0	0	0	0	0	0	0	0	0	0	0	0	0
290	PF3D7_0215700	DNA-directed RNA polymerase II subunit RPB2, putative	RPB2	ATGGCTGTAAAGATTGAAGCTCCATATTTTACGAACGATTTTGTAAAAACAGAACAATTAAGCGATAATGATAAGAACCCTAATGAACAGATTACAGAAGATGACAGCTGGGTTGTGATTGGATCATTTTTTGGAAGTCACGGTTTGGTGAATCAACAGATTGAAAGCTACAATGATTTTATTGAATACCGTATGCAAGAAATTATCGATGAGCATCCCAAGATAGAAATAAGACCACAACCCCAATATAGGACAGACAGAGATGAGAATGATAATATAATATATTCTTTAAAATTTGGTCAGCTATCTTTAGATAGACCTTTTTATGATGAGAAGAATTTATCTAATAAGAATTTATGGCCCCAAGAAGCCCGATTAAGGAATTTAACTTATTCATCG…	MAVKIEAPYFTNDFVKTEQLSDNDKNPNEQITEDDSWVVIGSFFGSHGLVNQQIESYNDFIEYRMQEIIDEHPKIEIRPQPQYRTDRDENDNIIYSLKFGQLSLDRPFYDEKNLSNKNLWPQEARLRNLTYSSAIYIDIEQSTYIIDEVTKKPVLKEKFIYERINLGRIPLMLKSMFCWTKGLPENEIADMGECSYDQGGYFIVNGGEKVLVAQERMANNFIYVFKKKQPSKFGWVAEIRSQMERSQATSGFSVKMKTRSGGSQYGSNKSGGQLVATLPYIRTEISVGILFRALGCTSDRDILQRIVYDFNDKLMINALRETLEECIEYPTQDVCLDFIGKRGPTVGASREKRILYAKELLRKEVLPHMGTHPGVESKKSYFIGYMINRLLLAELGRIK…	1340	0	null	no	GO_0006351	GO_0006366	GO_0006351,GO_0006366	0	0	0	0	0	0	0	0	0	0	0	0	0	0	0	0	0	0	0	0	0	0	0	0	0	0	0	0	0	0	0	0	0	0	0	0	0
386	PF3D7_0303300	DNA-directed RNA polymerases I, II, and III subunit RPABC2, putative	RPB6	ATGGATGGCTTTAATGATAATTACTTAAATGAGGATGAGGATTTTATGGGGGATGAATTTGGTCAAGGTATTGATAGTGATGATGGTGAGAATTATGAAAATGATATTGATATAATAACAGATCATCAAATAAAGAAAGACAATAAATCAGATTATGAAAATTCTGAGGCTAATGAAGATAATATTAGAATAACTAGTCCATATTTAACTAAATATGAGAAGGCTAGAATTATAGGTACTAGAGCTTTACAAATAAGTATGAACGCACCCTTAACCATACCTATAGAGACATCAAATGATATGATAAATAGTAAAAATGAGTATGATAATTATTTAAATAATGATCCTTTAGTTATAGCTGAAAAGGAATTATATAATAAATCCATTCCATTTATTTTA…	MDGFNDNYLNEDEDFMGDEFGQGIDSDDGENYENDIDIITDHQIKKDNKSDYENSEANEDNIRITSPYLTKYEKARIIGTRALQISMNAPLTIPIETSNDMINSKNEYDNYLNNDPLVIAEKELYNKSIPFILRRYLPNGSYEDWRLDELIID	153	0	null	no	GO_0006351	GO_0006366	GO_0006351,GO_0006366	0	0	0	0	0	0	0	0	0	0	0	0	0	0	0	0	0	0	0	0	0	0	0	0	0	0	0	0	0	0	0	0	0	0	0	0	0
1535	PF3D7_0708100	DNA-directed RNA polymerases I, II, and III subunit RPABC5, putative	RPB10	ATGATAATACCTGTACGTTGTTTTACTTGTGGTAAATTAATAGGAAACCTATGGAGTGTTTATGAGAAGAAACTAGAAGAAGGTTTATCAAAATGTGATGCTTTGAATGAATTAAATTTATACAGATATTGTTGCCGACGAATGATATTAACACATGCTGATATGATGGATAAATTATTATGTTATAATATATACGAAAGAAAACTGTAA	MIIPVRCFTCGKLIGNLWSVYEKKLEEGLSKCDALNELNLYRYCCRRMILTHADMMDKLLCYNIYERKL	69	0	null	no	GO_0006351	GO_0006366	GO_0006351,GO_0006366	0	0	0	0	0	0	0	0	0	0	0	0	0	0	0	0	0	0	0	0	0	0	0	0	0	0	0	0	0	0	0	0	0	0	0	0	0
3932	PF3D7_1304900	DNA-directed RNA polymerase II subunit RPB11, putative	RPB11	ATGTCTGTACCAACATTATCAAACAAGCCTGAAACTGTTGATTTGTTGGTATTAGCCCCAGGAGAAAAAAAAGTAACTTGTACCATATCTGATAAAGGAGATTGTAACATCTTTGTAATAAAATTGGAAGATCACACTATAGGAAATTTAATTAAAATACAACTCTGTCAAGACCCTAAAGTTCTTTTTGCTGCTTACAGACAACCACACCCTCTTCAAAATGCTATAGAAATTACTATTAAACCTAAGGGTTATGCAGGTGTGAAATTATTGTCAGATAATGTAAATAACATATTATCACAAGTTGCCACATTAAAGGAAAATTTTGCGAAAAAAATTCAAAAATATAAGGAAAGCAATTCTTATTATGAAGATTACTGA	MSVPTLSNKPETVDLLVLAPGEKKVTCTISDKGDCNIFVIKLEDHTIGNLIKIQLCQDPKVLFAAYRQPHPLQNAIEITIKPKGYAGVKLLSDNVNNILSQVATLKENFAKKIQKYKESNSYYEDY	126	0	null	no	GO_0006351	GO_0006366	GO_0006351,GO_0006366	0	0	0	0	0	0	0	0	0	0	0	0	0	0	0	0	0	0	0	0	0	0	0	0	0	0	0	0	0	0	0	0	0	0	0	0	0
4518	PF3D7_1364800	DNA-directed RNA polymerases I, II, and III subunit RPABC1, putative	RPB5	ATGGAAGATCCAGTAACGAGGTTTTATAAATGTCGAAAAACGTGTTGTGAAATGTTGGAGGATAGGGGTTATATTATGACTCCAAGAGAAAAGCTTGAAAACTTTTCAACTTTCAAAGAAATGTTTGAGGATAATGATAGACAACGATCTAAAATGGGTATTAGTACTACTCATAAAAATGATTCAAACAATAGAATTATAGTTTATTTTGCTGATGAAGTTAAAAAAACAGGGGTTAAACCACTAAGGGAATTAACCGAAAGGATGGAAGAAAAATCAATTCAGCGTGCTATTCTTGTAACACAAAATATATTAACCCCTTTTGCCAGAGATGCCATTAAGGAAGCAGCACCAAGACACATTATAGAAAACTTTTTGGATACTGAATTATTGGTTAAT…	MEDPVTRFYKCRKTCCEMLEDRGYIMTPREKLENFSTFKEMFEDNDRQRSKMGISTTHKNDSNNRIIVYFADEVKKTGVKPLRELTERMEEKSIQRAILVTQNILTPFARDAIKEAAPRHIIENFLDTELLVNITKHELVPRHIPLTSDEKKNLLQRYKIMENKLPRIQDVDPVCRYFGLSKGQVVKIIRPSETAGRYVTYRLVV	205	0	null	no	GO_0006351	GO_0006366	GO_0006351,GO_0006366	0	0	0	0	0	0	0	0	0	0	0	0	0	0	0	0	0	0	0	0	0	0	0	0	0	0	0	0	0	0	0	0	0	0	0	0	0
892	PF3D7_0506200	TATA-box-binding protein	TBP	ATGCATAAAGAAGAAAAAGAAAAAGACAAAAAAAAAGATAACAATTACGATAATGATTACCATAATGATTACCATAATGATTACCATAATGATTACCATAATGATTACGATAACGAGAACGATTGTAATAATAATGAACGTGAAGGATCAGTCCATGGGGATAACATCCATGCTTATGAAGAACAAAATTATGAAAACGATATATTAAACATAATAAATAAACAAATGGATAATATAAAAAGTAATGATCCCATAAAAAATAACAGTAATAATAGTTATAATAATAATTTTTTGGATATGAATTTTTTAGAACAAGACCAATTATTTTTAGAAAATATAAACCAAGATAATGTTGTGTCTGCACATTATACATCAGAATATGATAATAATGAAAAAGAA…	MHKEEKEKDKKKDNNYDNDYHNDYHNDYHNDYHNDYDNENDCNNNEREGSVHGDNIHAYEEQNYENDILNIINKQMDNIKSNDPIKNNSNNSYNNNFLDMNFLEQDQLFLENINQDNVVSAHYTSEYDNNEKEKSDDLKNKLVHKNISLNIHNIISSANLCIDINLRLVAVSIRNAEYNPSKINTLIIRLNKPQCTALIFKNGRIMLTGTRTKKDSIMGCKKIAKIIKIVTKDKVKFCNFKIENIIASANCNIPIRLEVLAHDHKEYCNYEPELFAGLVYRYKPTSNLKSVILIFVSGKIIITGCKSVNKLYTVFQDIYNVLIQYKN	327	0	null	no	GO_0006352	GO_0006366	GO_0006352,GO_0006366	0	0	0	0	0	0	0	0	0	0	0	0	0	0	0	0	0	0	0	0	0	0	0	0	0	0	0	0	0	0	0	0	0	0	0	0	0
1048	PF3D7_0522200	transcription initiation factor TFIID subunit 10, putative	TAF10	ATGGATAAAAATTTTGTGAATGAACATGATGAACAATTAATAAAAACATTGCTTAAAAACAAGCCAATATTCAGTGAAGATTTGATTGATTTCTATCTTTCACAAAGTGGATGTCAAATTAACGAAAAATCATGCCTAAGATTAATATCATTAGTGTTACACAAATCATTAGATAATATAATTAATAAAACAATCAGTCTACAAGCCAATGAATCTTCAAATAATGAGGAAAACAAAAAGAGTTTCAAAAACGAATTAAATTATAAAGAATTGGTAGAGGCACTAAAACAACTTGATGATACGTATGAAAATGAAGAATTGTTTAAAAACTTCAATGTATTTTTAGAATAA	MDKNFVNEHDEQLIKTLLKNKPIFSEDLIDFYLSQSGCQINEKSCLRLISLVLHKSLDNIINKTISLQANESSNNEENKKSFKNELNYKELVEALKQLDDTYENEELFKNFNVFLE	116	0	null	no	GO_0006352	GO_0006366	GO_0006352,GO_0006366	0	0	0	0	0	0	0	0	0	0	0	0	0	0	0	0	0	0	0	0	0	0	0	0	0	0	0	0	0	0	0	0	0	0	0	0	0
5322	PF3D7_1475000	mediator of RNA polymerase II transcription subunit 31, putative	MED31	ATGGGAATAAGCCAAAAAAAGTACATTGTGAATAACATTATAGATGATAATAAGAAATCAGTAATTATTCATAAGTATTATAGAGAAAGTTTATTTGAAAATAAATTAAGGTTTGAATGTGAACTCGAATTTTTACAATCATTATGTAATATAGATTATATAAAACATTTATATGAGAATAAATATTTTAATGATTATAATTTTATAAATTATTTGAAATATTTAAATTATTGGAGGAATAAACCTTATATATTTTATGTACATTTTCCTATATGTTTATATGTATTAGATATATTAAATAATAATAACACAAATATATATTTTAATCATGCAAATTCATTTCAAAATTTTATATACTATCTGAAGCTTCATTGGTTATATTTTAGTTACCAAATATAG	MGISQKKYIVNNIIDDNKKSVIIHKYYRESLFENKLRFECELEFLQSLCNIDYIKHLYENKYFNDYNFINYLKYLNYWRNKPYIFYVHFPICLYVLDILNNNNTNIYFNHANSFQNFIYYLKLHWLYFSYQI	132	0	null	no	GO_0006355	GO_0006366	GO_0006355,GO_0006366	0	0	0	0	0	0	0	0	0	0	0	0	0	0	0	0	0	0	0	0	0	0	0	0	0	0	0	0	0	0	0	0	0	0	0	0	0
534	PF3D7_0318200	DNA-directed RNA polymerase II subunit RPB1	RPB1	ATGACGGTTGATTTGAATATTCCATATTCAGCATGTGAATTAAAGAGAGTAAAACGATTAGAGTTAGGTGTTTTGGATCCAGAAATAATAAAAAAGATAAGTGTTTGTGAAATAGTAAATGTAGATATATATAAAGATGGTTTTCCAAGAGAAGGTGGATTAAATGATATACGTATGGGTACTATTGATTATAGGACCTTATGTGGTACATGTAATATGAATGTAAAATATTGTCCTGGTCATTTTGGTCATATAGAATTAGCGAAACCTATGTATCATTATGGTTTTATGAATGTAGTATTAAATGTTTTAAGATGTGTATGTTATCATTGTGGTAGATTATTATGTAATGTGAACAGTTCTAAAGTTAAATATATTGAAAAGATTAAAGTAAATAGT…	MTVDLNIPYSACELKRVKRLELGVLDPEIIKKISVCEIVNVDIYKDGFPREGGLNDIRMGTIDYRTLCGTCNMNVKYCPGHFGHIELAKPMYHYGFMNVVLNVLRCVCYHCGRLLCNVNSSKVKYIEKIKVNSLRLRKLAELCLGIRACDHSVEEEGLNINDNSLNNFYNNDLSNLNMNQQMLLNKSNYTNIFEMVSKEDVDCGCVQPKYSREGPNMYIQFLHSSEEDIDESKRKLSAEEALEILKKIRKEEMSILGFNSDRCVPASLILTCIPIPPPCARPYVQYGNQRSEDDLTLKLLDIVKTNIQLKRQTDRGAKSHVLQDLCSLLQFHITTLFDNDIPGMPIATTRSKKPIKAIRTRLKGKEGRLRGNLMGKRVDFSARTVITGDPNLNIDYIGV…	2457	0	null	no	GO_0006366, GO_0006351	GO_0006366	GO_0006366,GO_0006351,GO_0006366	0	0	0	0	0	0	0	0	0	0	0	0	0	0	0	0	0	0	0	0	0	0	0	0	0	0	0	0	0	0	0	0	0	0	0	0	0
2373	PF3D7_0929000	transcription initiation factor TFIID subunit 7, putative	TAF7	ATGGAAAAAAAAAAGAAGGAAAGTACCATAAAAATATCTCTTAATATAAATACGAAATTTAACGAATCTTATTTGGATGAGCAAAATGATATAATAAATGAGGCACTTATTAAGAACAATAACAAGGAAATTATACATTCCCTGAATCTTATTGAAAACATTCGACAGGGGACATTCGACTACAAGGATCTCAGAGAAGTTTATTTTATGAACGACAATGATTTGTTCAGCATGTTAAATGATAAGAAAGCCTCAGAAGAAAAAGGGAAAGGTAAAGAAGACGCACATAATAATAATAATATTGATAATAAGATATGTAATAATGATAAGGTAGGTGATAAAAATAAAAAGTTAAGTAATAATAATAATAATAATGGAAATGATTTAAATATACAGATT…	MEKKKKESTIKISLNINTKFNESYLDEQNDIINEALIKNNNKEIIHSLNLIENIRQGTFDYKDLREVYFMNDNDLFSMLNDKKASEEKGKGKEDAHNNNNIDNKICNNDKVGDKNKKLSNNNNNNGNDLNIQIEGDQNYNFNKNNETNIFVLDNDVDKVCIIRFPFSVSKDIKKYLLNKNLDMVIQPTTLLNSRFFLIHFKNINKKFHGILLELSTHIEIHKTLDRNNLYKSNDVSQMIYVYEHNTNSKELLKKFINNNFELCGGISKKLNHFIFQNHTKLFKYHDIYFAEKLIYEYLNTPYYDYFDLYVKTLNEMHNHIIMEKENNNKQNEIVDETTDLAAILGSLDNSYNIMNLIEKQDGDIDFEALLNYDIEKENYESDVSDLLLGGTYYLQKK	397	0	null	no	GO_0006367	GO_0006366	GO_0006367,GO_0006366	0	0	0	0	0	0	0	0	0	0	0	0	0	0	0	0	0	0	0	0	0	0	0	0	0	0	0	0	0	0	0	0	0	0	0	0	0
188	PF3D7_0205500	DNA-directed RNA polymerase II 16 kDa subunit, putative	null	ATGGCAAATAATATCAATGGAGATATAAAAAATTTAGACCTTGGTCCTGATTTTAAGAATTGTAAATGTTTGAATTTATGTGAGCTTCAATTAATTTTGGGAGACCAGCTTCGATTAACATCCAAGAGAAATGAAGAAGCTCAAGCATTGATTAAATCGTCCTATGATTATGCCAATAAATTTGCTGCAATAAAAAATAGAAGTTCAATTGTCGATATTAGAACTAACTTAGAACGTATAGGCGATTTACATGAATATGAAATAGCCATGTTAGTTAATCTTTTACCTAAGACCATATTAGAAGCTAGATATTTAATTCCTTCGTTAATTCGTTTAAATGACGAAACCTTAAATTCTATTTTAGAACATCTTATAAGCTATAAAATGTACGTTTCTTAA	MANNINGDIKNLDLGPDFKNCKCLNLCELQLILGDQLRLTSKRNEEAQALIKSSYDYANKFAAIKNRSSIVDIRTNLERIGDLHEYEIAMLVNLLPKTILEARYLIPSLIRLNDETLNSILEHLISYKMYVS	132	0	null	no	GO_0044237, GO_0006351	GO_0006366	GO_0044237,GO_0006351,GO_0006366	0	0	0	0	0	0	0	0	0	0	0	0	0	0	0	0	0	0	0	0	0	0	0	0	0	0	0	0	0	0	0	0	0	0	0	0	0
2738	PF3D7_1027400	DNA-directed RNA polymerase II subunit RPB7, putative	RPB7	ATGTATTTTGTTATTGAAGAATGGAAAAATGTAATCATTAAACCAAGCCAACTAGGCCCCAGATATCAACAATATATTGAAGATATGTTAAGGAATAGTGTAGAAGGGCAATGTAGTGTAAAATATGGATATGTTATTTGTGTTATTAGAATAATTCATAGTGAACCTGGGCGAGTTCAGGATGGAACTGGTATGATTGTAGTTAAGGTTAAATATCAAGCCATTGTTTTTAAGCCTTTCAAAGATGAGGTATTGGATGCCATTGTAACGGACGTGAACAAGTTAGGTTTTTTTGCTCAAGCAGGTCCATTAAAAATATTTATATCAAGAACGGCTATTCCAAAATATTTCGAGTATTCTGAGGATTTACATTACCCCTGTTTTTCATCAGGAGATTAT…	MYFVIEEWKNVIIKPSQLGPRYQQYIEDMLRNSVEGQCSVKYGYVICVIRIIHSEPGRVQDGTGMIVVKVKYQAIVFKPFKDEVLDAIVTDVNKLGFFAQAGPLKIFISRTAIPKYFEYSEDLHYPCFSSGDYNIKPQTTVRIKLQGIRYDLSNMFAIATINNEYLGCIESNILQVM	177	0	null	no	GO_0006351	GO_0006367	GO_0006351,GO_0006367	0	0	0	0	0	0	0	0	0	0	0	0	0	0	0	0	0	0	0	0	0	0	0	0	0	0	0	0	0	0	0	0	0	0	0	0	0
99	PF3D7_0110800	transcription initiation factor TFIIB, putative	null	ATGTCATCCATTTCTCCAAATAAAAAGTTTGCTTTAACCTCTGCGAGTGATAAGCCCATCACTTTAATTAGAACCAATGTAAGTAATGAGAATAATAATGTGAGGAGAAAGATGTTAAGAAACTTTAGGAATAGTAGAAATACGACATGCCCAGATTGTAAAGAAAAAGGAATAATTATTTGTGATACGAGTGAAGGTACTCAAATATGTAATGGATGTGGTATGGTCGTTGAAAGTAAGATTTTGTCAGAAGAACAAGAATGGAGAAATTTTCAAAATGATGGTCAGTCAAAAAATACTGATAGAAATAGAGTAGGTGAAGTTAGTGATATATGGCTAGAAAATAATTTAACTAGTACTACATTTATTAAATCTAGTAAAAAATTACAACATTTAAAT…	MSSISPNKKFALTSASDKPITLIRTNVSNENNNVRRKMLRNFRNSRNTTCPDCKEKGIIICDTSEGTQICNGCGMVVESKILSEEQEWRNFQNDGQSKNTDRNRVGEVSDIWLENNLTSTTFIKSSKKLQHLNMMTQINKNDQTLISAFNILKLICDTFFLRSNVIERAKEITKELQDMEQLKNRINNLNMLAVVYLACREAGHIKSIKELITFDRSYKEKDLGKTINKLKKVLPSRAFVYNENISHLIYSLSNRLQLSIDLIEAIEYVVKKASTLITTSHRLNSLCGGSIHLIVELNTNEEKNMKLPNLSQIATVCGVTTNTLKTTFKELLNAAEYIIPKYYLSEDNPKLSMLKQKYLSEDKRKKN	367	0	null	no	GO_0070897, GO_0006355	GO_0006367	GO_0070897,GO_0006355,GO_0006367	0	0	0	0	0	0	0	0	0	0	0	0	0	0	0	0	0	0	0	0	0	0	0	0	0	0	0	0	0	0	0	0	0	0	0	0	0
4735	PF3D7_1414600	mRNA-capping enzyme subunit alpha	Pgt1	ATGATCACGAGTACATATCACCCTGGAGAAAAAATTGAGAATGAGTTTTTGAAGGAAAAAATTCGCTCCAAAATTAACGAAATGTTAAAATGGAAAAGGAGAGGTTTCCCAGGTTGTAATCCTGTATCTTTAACAAATCATAATATAAAAAATTTATTTACGAAAGAGTATTTAATATGTGAGAAGACGGATGGAGTACGGTACTTTTTATTTATAGCATCAAATACAACATTTTTGATTGATAGGAATTATGAAATTTTTAAGAATGATATGCATATACCTACCATAGAAGATTTATCCAAAAAACAACAACTAACTTTATTAGATGGAGAATTAGTTGAAGATATTATATATAATGAGAAGACTGGTGTAGAAGAAAAAAAAATTGTGTATTTGATA…	MITSTYHPGEKIENEFLKEKIRSKINEMLKWKRRGFPGCNPVSLTNHNIKNLFTKEYLICEKTDGVRYFLFIASNTTFLIDRNYEIFKNDMHIPTIEDLSKKQQLTLLDGELVEDIIYNEKTGVEEKKIVYLIYDGLYIQRKDITNLSYFERLTNVYNYVITPLKKYKKSQKNKKNKNNLQTNHENESLYIELDEKDNIKKRKSNLNNMLTEEENVLISHKKNDHPHINNKNMNAVNVNGVDVNGVNINQDFNNHNENNNLLMNQGILIDENNNGIQNIGTNDNINSLNNCNLLLYKREEHREEKEYEEEEDERSYSSDDTASTIHEEEIPFEIYLKDFYPIEKICELIKIMKKLPHYSDGIIFTPLHSPYITGNFYQLLKWKPLNLNTVDFGIETIYD…	520	0	null	no	GO_0006370, GO_0006397	GO_0006370	GO_0006370,GO_0006397,GO_0006370	0	0	0	0	0	0	0	0	0	0	0	0	0	0	0	0	0	0	0	0	0	0	0	0	0	0	0	0	0	0	0	0	0	0	0	0	0
1399	PF3D7_0625600	poly(A) polymerase PAP, putative	null	ATGCACACTGTTTACGAAAACGAGAACTTGATTGAATGTAGTAATTTTATGCTGAACAGAAAAGATAGCCTTGAGGAATTTTTTGAGGTGAGTGAGATAAAAGAAGAGAATGAGGAAACGTATTTAAATTATAATATAGAATGTACATTAAATAAGAAAATAGAAGATAAGAAGAATAATGTTACGTATAGGCGTGAAATAATAAATGAGGAGAATATACAAGAGAATAAAAAATATGAAGAGGGTGGTGTTACAGAGCCCATATCATTAAATTATCCCTCTGAAGAAGATATTAAGAGATCAAATGATGTAGTAGAATTATTAAAGGGTTATAATTTATTTGAAGAAGAAAGTGGTTTAAAAAAGAGAGAAAATGTTTTAGGTATGATAAATAAATTA…	MHTVYENENLIECSNFMLNRKDSLEEFFEVSEIKEENEETYLNYNIECTLNKKIEDKKNNVTYRREIINEENIQENKKYEEGGVTEPISLNYPSEEDIKRSNDVVELLKGYNLFEEESGLKKRENVLGMINKLFHEFLIELSINQGISEEEANNISGNLYTFGSYRLGVITPNSDIDCIFLAPQNLTREIFFNEFYLKLQQDRNVKKLQALPETYTPIIQFMYDDVDIDLLLATLPYKTLKDCYYSLDNDHILKNLDEVTVRSLNGIRVADLILNSVPNKDYFRNTLRFIKLWAKSRGIYSNILGFLGGISWALLTAKICQLYPNFNVSQLICKFFKVYSIWNWKYPVLLQNIKKYNIEGLNNFPVWDPEKNIKDKLHIMPIITPAFPCMNSTHNVTYC…	631	0	null	no	GO_0031123, GO_0043631	GO_0006378	GO_0031123,GO_0043631,GO_0006378	0	0	0	0	0	0	0	0	0	0	0	0	0	0	0	0	0	0	0	0	0	0	0	0	0	0	0	0	0	0	0	0	0	0	0	0	0
198	PF3D7_0206600	DNA-directed RNA polymerase III subunit RPC10, putative	null	ATGGCCTTTTTTTGCCCCAATTGTCATAACATTGTTTTAGTACATATAGAAAAGGGTGTTTATTTTTATTGTAAATCATGTAATTATAAGTATAAAATAAAAAATAAAATATATAATAAATTCGATTGTCAACAATTTAACAAGACTATTCCTTTGGATGCTGTTGATATAAATAATAAAAATATGTCTAAGACTCAAGCTGTATGTCCAAAATGTACAAACGATGAAGCTTATTTTTATACTTTACAAATAAGATCAGCAGATGAACCTAGTACCATTTTTTATATTTGTGTAAAATGTAACTATCACTGGAAAGAATAA	MAFFCPNCHNIVLVHIEKGVYFYCKSCNYKYKIKNKIYNKFDCQQFNKTIPLDAVDINNKNMSKTQAVCPKCTNDEAYFYTLQIRSADEPSTIFYICVKCNYHWKE	106	0	null	no	GO_0006351	GO_0006383	GO_0006351,GO_0006383	0	0	0	0	0	0	0	0	0	0	0	0	0	0	0	0	0	0	0	0	0	0	0	0	0	0	0	0	0	0	0	0	0	0	0	0	0
3421	PF3D7_1206600	DNA-directed RNA polymerase III subunit RPC2, putative	RPC2	ATGAAAGATATTATTAAGATTAAAGCGAAAAGGAAAAACGTGAATAAAATTAATGAAGAGAATGAAGAGGAAATATACCAGTTAAAAGAAAATAATAGAGCACAAAATGATGATGATGATGATGATTATAATAATAATGAGAAGAATAAGATAAATAAAATAATACTAAAAGATGAAAACATAAATAGCAAAAATGATTATAATAATATGATGAATCCATACAATGTAATTGGTAAAAGCGGAAATGAAGAAGATACACATATAAAAATAGAAGAGGAGAAAAATAAAGATAATTTGTATGAATGTAAAAATGATGATAATAAATTCTATGAGAGTAAAATAAATTTTATTAAAAAACAAGATGAAGCAAATAATGAAGATAATAATAATAATAATAAT…	MKDIIKIKAKRKNVNKINEENEEEIYQLKENNRAQNDDDDDDYNNNEKNKINKIILKDENINSKNDYNNMMNPYNVIGKSGNEEDTHIKIEEEKNKDNLYECKNDDNKFYESKINFIKKQDEANNEDNNNNNNNNNNNCYYNNYENKHLNIFNNKNEVNNKNLSSNKILKDEYYDKNFNEDNINNLKEFIHNENKKPKTGKLYNNMNILNDEENFSGLVIKNKEHNKKIYENSKCVNTLNEKWKLLPAYLKVKGLVKQHIESYNYFIKREIKTIMNATTNKIIKSDIDEHFYVEFLDITVGTPSVEENMIETKLTPQICRQRDLTYSAPIYVDVEYVKGNSIITKNNVEIGRLPVMLRSDICVLNNKSEEELMKLGECPYDPGGYFIVKGTERVLLMQE…	1450	0	null	no	GO_0006351	GO_0006383	GO_0006351,GO_0006383	0	0	0	0	0	0	0	0	0	0	0	0	0	0	0	0	0	0	0	0	0	0	0	0	0	0	0	0	0	0	0	0	0	0	0	0	0
4174	PF3D7_1329000	DNA-directed RNA polymerase III subunit RPC1, putative	null	ATGATGAAGAAGAAAAATATCGACATAGAGGAGCTTAAAAGGCTCATTGAAGAAAGCAGCATGAAAAAAAGATTTGTAAAAGATATAAAAAGAAATTGTGAAATAAAAAGTATAAGGTTTGGTATTATGAGTAAGGAAGATATAATAAAATATTCAGAAGTGAAAATAATGAATAGAGAAATGTATAAGAATAATAGTGGTATACCATATCCTTATGGTGTTTTAGATTTAAAACTAGGTGCTCATAAAAGTAACTCTGTATGTGAAACATGTAATAAGAAATTAATAAATTGTTCAGGACATTTTGGTTATATAGAATTGAATTATCCTGTATTTCATATTGGTTATTATAAATATATAATACATATATTATATTGTATATGTAAATATTGTTCAAGT…	MMKKKNIDIEELKRLIEESSMKKRFVKDIKRNCEIKSIRFGIMSKEDIIKYSEVKIMNREMYKNNSGIPYPYGVLDLKLGAHKSNSVCETCNKKLINCSGHFGYIELNYPVFHIGYYKYIIHILYCICKYCSSLLLSKEKIDFYCNLKKKSTDDSFYKKHLFKRILNNCKKVNKCYICGNPQGVIKKIIKPSLDQFMKLKHILKVKENGKMIIKEEDLNSLYVLKLFKNINPYHVKLLNIENPEKLIITALLVPPNTIRPSVIIDEHGTAEDDLTCILSEITQLNNTIYNQCTNGYQTNQFLGNVEFLQLQITRFINSDSPAVSQLLATQNISKPGRGICQRLKGKEGRFRCNLSGKRVDFSSRTVISPDPNISIDEVVIPKIIAMRLTYPETVNKYNI…	2356	0	null	no	GO_0006351	GO_0006383	GO_0006351,GO_0006383	0	0	0	0	0	0	0	0	0	0	0	0	0	0	0	0	0	0	0	0	0	0	0	0	0	0	0	0	0	0	0	0	0	0	0	0	0
5065	PF3D7_1449300	transcription factor IIIb subunit, putative	BRF1	ATGGTTGGACAATTTATACCATCTAGCGGAAATAAATCGTTCATTTTGTCGTGGGGTATTAGAGAAAGTCGGGAAATATCTTTACAAAAAGGATATGTAAATATTCAAAAAATTGCTGATCACTTACATTTATCAAGTCAACATATTGAAGCGGCGCAGAGAATTTATTTGATGGCCTTACAAAGAAATTTCACCATGGGTCGTAATAATTCATATGTTGCTGCTTCATGTTTATATACCATCTGTAGAAGAGAAAAATCGCCTATAATGTTAATAGATTTCAGTGATATATTACAAACTCCTGTAAAACCTTTAGGCAAAACATTTTTAAAATTATTAAGATTATTACATATTAATGTACCAAATATTGACCCATCTTTATTTTTAGAACGATTTGCT…	MVGQFIPSSGNKSFILSWGIRESREISLQKGYVNIQKIADHLHLSSQHIEAAQRIYLMALQRNFTMGRNNSYVAASCLYTICRREKSPIMLIDFSDILQTPVKPLGKTFLKLLRLLHINVPNIDPSLFLERFAHKLNLKNDIYKVTYTGIKLIQAMTRDWISTGRRPTGLCGAALLISTRMHGICINSNTIADIVRISNPTIIKRLAEFKNTSTAQIKASEFDKISINDIPSNTIPPCVIYYNKKKFKDNISEKNKTLSLCDDVDNLSEDMSCTLINNEENKMDSDMLNDNFPSSKNEENKTTLLSSTHSNIDNNDLIFNKNHSDHLSNSDYSIHVDEICNENPKGNDIHNLAQKIMNTINLDINSNILKNVDTKINLHNNLMDTLSVNTDVSTNTQKG…	684	0	null	no	GO_0070897, GO_0006355	GO_0006384	GO_0070897,GO_0006355,GO_0006384	0	0	0	0	0	0	0	0	0	0	0	0	0	0	0	0	0	0	0	0	0	0	0	0	0	0	0	0	0	0	0	0	0	0	0	0	0
3820	PF3D7_1248000	tRNA-splicing endonuclease, putative	null	ATGAAAATTATATATGAATTTAAAAAAGAATATTATGAAATAATATTGAATGAAAATAATGCTGACGATAATGTAATTGATTTGTTTGAAAAAAATACTAATAAATGTAATATCGAAATAAAACCCTATGACGATATAAATTCAGACTTACTTGATTTTGATCAATTTAAAATGTTCAATATTGATAAGGATGACATTAAAAAAAAAAATGAGGATAAAAAAGATGAAGATAGGATAAAATATATTTTGGATAAAGAGTCATATAACAATTCGATTGATAAGTTAAACGATAATTCATGTGATGAGTCATGTTATATAACAGATGATGAATTATGTAAGCAAATAAATAATCCATTTGATAATACATATAACAATAAATTCGTTGTAAAATATAAAGAA…	MKIIYEFKKEYYEIILNENNADDNVIDLFEKNTNKCNIEIKPYDDINSDLLDFDQFKMFNIDKDDIKKKNEDKKDEDRIKYILDKESYNNSIDKLNDNSCDESCYITDDELCKQINNPFDNTYNNKFVVKYKEYFEENSFIVKKGDIYGADFLLYITEQKYAHSLYAVYIIYKHYILRDLIRILRVSHSIKKKVILILWNELNCFNISDTLVYIKSYKYK	220	0	null	no	GO_0006388	GO_0006388	GO_0006388,GO_0006388	0	0	0	0	0	0	0	0	0	0	0	0	0	0	0	0	0	0	0	0	0	0	0	0	0	0	0	0	0	0	0	0	0	0	0	0	0
5113	PF3D7_1454100	tRNA intron endonuclease, putative	null	ATGATACTTAAAAATAGAAAACGAGAAATTGTTTTCCATGATTTGAATAAACTTTTCATTGTAGTTGATGGTTTTAAATATGGAGCAGATTTTGTACTATATAAAAATAATGTTGATGAAGAACATGGATTTGCTCTAGTTTTTATAAAGGAGGAAAATATATGCTTAAATGAGAAAGAAAAAAACATAATTGTTAGAATATGTGAAAGTGTTAAAAAGAAGGCAATTATTGCTTATATTAATGAAGAGAATAAATCTATAAGATACGAAGAAGTTTTTAGAAAGAGAAAATGA	MILKNRKREIVFHDLNKLFIVVDGFKYGADFVLYKNNVDEEHGFALVFIKEENICLNEKEKNIIVRICESVKKKAIIAYINEENKSIRYEEVFRKRK	97	0	null	no	GO_0006388	GO_0006388	GO_0006388,GO_0006388	0	0	0	0	0	0	0	0	0	0	0	0	0	0	0	0	0	0	0	0	0	0	0	0	0	0	0	0	0	0	0	0	0	0	0	0	0
1082	PF3D7_0525600	RNA methyltransferase, putative	null	ATGATTATACATAATTTTTTTGTTTCTTCATTTCGACAGAAGGTTCATAACTTGAACATATTTAAAAGAAGAAATACGAAAATTTTATTTTATTCCACAATAAATTGCAATATCATTAACAATGAGATAACACCTAAGGAGGATAGTTTAAAACCTCACTGGATTAACATGGATAATAATAAAAAGCTTAAGAATAAATGTGTAGATGATGAGACTTATAAAAATGAAGAGGCAAACCTTCAGAATAATGAATATTTATATATATCTAAGAAATCTAGGATGATGAAATATATTATAAGATTACGAAAAAAAAAAAACTTTCGAAAAAAAAACAATTCATTTTTTGTTAAAGATTCTAATACAATTTTGCATTTATCAAAAAATAAGAATATACAATTT…	MIIHNFFVSSFRQKVHNLNIFKRRNTKILFYSTINCNIINNEITPKEDSLKPHWINMDNNKKLKNKCVDDETYKNEEANLQNNEYLYISKKSRMMKYIIRLRKKKNFRKKNNSFFVKDSNTILHLSKNKNIQFEAVLGTNKDILNNFKNKQCTKLYYINKDILNYIFSDTLNVRRQDKNDAVAIIKIPCLSNKINNIKFLLVLDRIRYAYNLGKILNVAYSFNIDCLYYTKHTADPYNPKVMEITKGTHLNIPHIFGNYQELEQLCKEHKLIPIVAHTKGQNIDTFFKKNKIKNNNINGICLILGSESTGPHTDVFKYAHPIQLPMHEMTNSLNVFVAASILIHYIKKCCL	351	0	null	no	GO_0006396	GO_0006396	GO_0006396,GO_0006396	0	0	0	0	0	0	0	0	0	0	0	0	0	0	0	0	0	0	0	0	0	0	0	0	0	0	0	0	0	0	0	0	0	0	0	0	0
2644	PF3D7_1018000	tRNA pseudouridine synthase, putative	null	ATGGTAATAATCCTCTTACTTGCTATAATCTGCTCATATAATATAACATCATATCCATGTTTAAATTATAAAAGAAGAAAAAACTTTTATTATTGTGAAATATTTAAAAATGAGAAAGAGGAGAATTCATTAAAATATCCGATTTATAAATATAAACGTATAAAAAGGAATCGCTCTAATATAAATGCTTTTAAAAAGTATAATTTAATAAATACGTTAATAAATCGAAATTATAATGTCAATAATAATATGAAGAAGGATGGTTTCCATACAAGAAGATGTGTAGCTCAATTAAGTTTATTCTCTAGAAAGAAAAGAAAAAAAACAAACAATGAAAAAAAATATATATTTAATCATATTCATTTTTATAGTTATATTCTTGTGTATTTTAATGAGGGC…	MVIILLLAIICSYNITSYPCLNYKRRKNFYYCEIFKNEKEENSLKYPIYKYKRIKRNRSNINAFKKYNLINTLINRNYNVNNNMKKDGFHTRRCVAQLSLFSRKKRKKTNNEKKYIFNHIHFYSYILVYFNEGLLQHWTTTPHVTKIIFDNMYKGFRMKGGDNINIMGFYNTHNRKIHNYSLDIHRSDEKDTTDIIKKIKNKTGEKLIKDNNKKKNNNNINSNNNNINSNNNNNNNNNNNNNINDISIKKDRVCCNNPHINNKGDMDEENNEDHVNKTKEEHSFESVLNKYNKELILSKSKIVHLDFPICKNNSSNIVTMDDIFYGGFLNIYKPVKLYSMRVCEKIKKILKDYFYKLNKKKVNIKVGHGGTLDPFAEGVLIIGIQQATKKLSDFLKCYK…	560	0	HMM: MVIILLLAIICSYNITSY, NN: MVIILLLAIICSYNITSY	yes	GO_0009451, GO_0006396, GO_0001522	GO_0006396	GO_0009451,GO_0006396,GO_0001522,GO_0006396	0	0	0	0	0	0	0	0	0	0	0	0	0	0	0	0	0	0	0	0	0	0	0	0	0	0	0	0	0	0	0	0	0	0	0	0	0
1287	PF3D7_0614400	pre-mRNA-splicing factor CWF7, putative	CWF7	ATGGATATGCAAGAGCAGATAAGCGATAAGGGTGCTGATGATTATGATGACACTTTAGTAGAATTAAAGGAAAGTGAATTACTTAAAGAAGACGAGAAAAAAAAAACAAAAAAGAAACTGTATGAATTAAACGAATTACATCATTTAGTTAATGCACTACCTTATATTGATTCATATGACAATGAGTTGGAGCAAAATGCAAAAAGGCTAGTAGAAGAAGAAATGAATTTAATGCATAAAAATAACGAGATAAAAAATTATTTAGAGACTTTCCCTCTTCCTAAAATAACATATTTAAGTAATGATAATTCTATTATACAAAATGAATTAAAACGATGTGAAGAAAATCGAAAAATGCAGAAACTCAACTTTGATCATTATAATATTGAAAATGATGTA…	MDMQEQISDKGADDYDDTLVELKESELLKEDEKKKTKKKLYELNELHHLVNALPYIDSYDNELEQNAKRLVEEEMNLMHKNNEIKNYLETFPLPKITYLSNDNSIIQNELKRCEENRKMQKLNFDHYNIENDVLNNKNIEEWEKTLKKYEIILENSHNALINMELMNKYKEVMWSEHMKVFNHLDINLQNNIKTLKDDIDNINKKRKLHQLSYVNELSTLQNEQKEYKKKNNMVLNEIKKLMTENMLMKYKTNMI	255	0	null	no	GO_0008380, GO_0006397	GO_0006397	GO_0008380,GO_0006397,GO_0006397	0	0	0	0	0	0	0	0	0	0	0	0	0	0	0	0	0	0	0	0	0	0	0	0	0	0	0	0	0	0	0	0	0	0	0	0	0
779	PF3D7_0419600	ran-specific GTPase-activating protein 1, putative	RANBP1	ATGGATGATGATAAGAATGACTACAATCCCGAAGAAGAAGTTGTCACAGGAAATTGGAATACTCCAAAGGTTGAATTAAAAGAAGTGGAAATAAAAACAGGAGAAGAAGACGAAAGTTTATTTTGGTCTGGTCGATCAAAATTGTATAGGTGGGTTGAGGGTGAATGGAAAGAAAGAGGATTAGGTGAATCCAAATTATTATTACATAAGAAAAAAGGAATAATACGATTTCTTTTAAGGCAAGAAAAAACATTGAAAGTTGTAGCTAACCATTATATATATCCCAATGAATCATATTGTAAGCTTGTTCCAAATGCTGGAAGTGAAAAAATATATGCCTGGACAGTGAAAGATTTTGCAGAGGAACCAAAAATTGAACAGTTTGCTTTAAAATTTAAT…	MDDDKNDYNPEEEVVTGNWNTPKVELKEVEIKTGEEDESLFWSGRSKLYRWVEGEWKERGLGESKLLLHKKKGIIRFLLRQEKTLKVVANHYIYPNESYCKLVPNAGSEKIYAWTVKDFAEEPKIEQFALKFNTADAAKLFKQKFDEAGQVNLKLLDSQGNLKEKVEEKKDDDKKEKKDDNSDNNKKTKEDEEEKKDKVEKDEKKKEDEKENVKKDVKEDDEEKDKDDKTKDDDTSKDEKEKEVEQKEDVKEKEEKEKEKDDKRSDDKKSDEEENIKRED	280	0	null	no	GO_0046907	GO_0006405, GO_0006606	GO_0046907,GO_0006405,GO_0006606	0	0	0	0	0	0	0	0	0	0	0	0	0	0	0	0	0	0	0	0	0	0	0	0	0	0	0	0	0	0	0	0	0	0	0	0	0
3037	PF3D7_1117700	GTP-binding nuclear protein RAN/TC4	RAN	ATGGATTCACAAGAATATATTCCACAATATAAATTAATCTTAGTCGGTGATGGTGGTGTTGGCAAAACAACCTTTGTGAAAAGACACTTGACTGGAGAATTTGAAAAAAAATATATACCTACTCTTGGTGTGGAAGTTCACCCCTTAAAATTTCAAACAAACTTTGGAAAAACTCAATTTAACGTATGGGATACTGCAGGACAAGAAAAGTTTGGTGGTTTAAGAGATGGATATTATATAAAAAGTGATTGTGCTATAATTATGTTTGATGTATCTTCTCGTATTACTTACAAGAACGTTCCAAATTGGTATAGAGATATTACAAGAGTGTGTGAAACAATTCCTATGGTTTTAGTTGGAAACAAAGTTGATGTTAAAGACAGACAAGTAAAATCAAGG…	MDSQEYIPQYKLILVGDGGVGKTTFVKRHLTGEFEKKYIPTLGVEVHPLKFQTNFGKTQFNVWDTAGQEKFGGLRDGYYIKSDCAIIMFDVSSRITYKNVPNWYRDITRVCETIPMVLVGNKVDVKDRQVKSRQIQFHRKRNLQYYDLSARSNYNFEKPFLWLARRLSNQPNLVFVGEHAKAPEFQIDLNIVREAEKELEQAAAVAIDEEDIEN	214	0	null	no	GO_0006184, GO_0006886, GO_0006913, GO_0015031, GO_0007165, GO_0007264	GO_0006405, GO_0006886, GO_0051726	GO_0006184,GO_0006886,GO_0006913,GO_0015031,GO_0007165,GO_0007264,GO_0006405,GO_0006886,GO_0051726	0	0	0	0	0	0	0	0	0	0	0	0	0	0	0	0	0	0	0	0	0	0	0	0	0	0	0	0	0	0	0	0	0	0	0	0	0
234	PF3D7_0210100	60S ribosomal protein L37ae, putative	null	ATGTCAAGAAGAACTAAAAAGGTCGGTTTAACAGGAAAATATGGTACCAGATACGGATCATCATTACGTAAACAGATAAAAAAAATTGAATTAATGCAACATGCCAAGTATTTATGTACCTTCTGTGGAAAGACTGCCACAAAAAGAACTTGTGTAGGAATATGGAAATGTAAAAAATGTAAAAGAAAAGTTTGTGGAGGTGCTTGGAGTTTAACCACCCCAGCTGCTGTTGCTGCTAAATCAACGATTATTAGATTAAGAAAACAAAAAGAAGAAGCCCAAAAATCTTAA	MSRRTKKVGLTGKYGTRYGSSLRKQIKKIELMQHAKYLCTFCGKTATKRTCVGIWKCKKCKRKVCGGAWSLTTPAAVAAKSTIIRLRKQKEEAQKS	96	0	null	no	GO_0006412	GO_0006412	GO_0006412,GO_0006412	0	0	0	0	0	0	0	0	0	0	0	0	0	0	0	0	0	0	0	0	0	0	0	0	0	0	0	0	0	0	0	0	0	0	0	0	0
312	PF3D7_0217800	40S ribosomal protein S26	RPS26	ATGCCAAAGAAACGTAGAAACGGAGGAAGGTCCAAACATAACAGAGGACATGTAAATCCTTTAAGATGTTCGAATTGTGGAAGATGTGTTCCTAAGGATAAAGCTATAAAAAGATTCAACATAAGAAATATTGTAGATACATCAGCACAAAGAGATATTAAAGAAGCATCTGTATATTCTACTTTTCAATTACCTAAATTATATATTAAACAATGTTACTGTGTATCATGTGCTATCCATTCACGTTTTGTTCGTGTAAGATCAAGAGAACAAAGAAGAGTAAGAAAAGAAACAGCTAAACATGTTAACCCATCCCAATTATAA	MPKKRRNGGRSKHNRGHVNPLRCSNCGRCVPKDKAIKRFNIRNIVDTSAQRDIKEASVYSTFQLPKLYIKQCYCVSCAIHSRFVRVRSREQRRVRKETAKHVNPSQL	107	0	null	no	GO_0006412	GO_0006412	GO_0006412,GO_0006412	0	0	0	0	0	0	0	0	0	0	0	0	0	0	0	0	0	0	0	0	0	0	0	0	0	0	0	0	0	0	0	0	0	0	0	0	0
323	PF3D7_0219200	40S ribosomal protein S30	null	ATGGGAAAGGTACATGGATCATTAGCAAGAGCTGGTAAAGTTAAAAACCAGACTCCTAAAGTCCCAAAGTTAGATAAGAAAAAACGTTTAACAGGAAGAGCTAAAAAAAGGCAACTTTATAACAGAAGATTTTCAGATAATGGAGGTAGAAAAAAAGGACCTAATTCAAAAGCTTAA	MGKVHGSLARAGKVKNQTPKVPKLDKKKRLTGRAKKRQLYNRRFSDNGGRKKGPNSKA	58	0	null	no	GO_0006412	GO_0006412	GO_0006412,GO_0006412	0	0	0	0	0	0	0	0	0	0	0	0	0	0	0	0	0	0	0	0	0	0	0	0	0	0	0	0	0	0	0	0	0	0	0	0	0
397	PF3D7_0304400	60S ribosomal protein L44	RPL44	ATGGTGAATGTTCCAAAAACAAGAAAAACATATTGTAGTAACAAATGTAAAAAACATACAATGCATAAAGTCAGTCAATATAAAAAAGGAAAAGAAAGATTATCATCATTAGGAAGAAGAAGATATGACATGAAACAAAAAGGTTTTGGAGGTCAAACAAAACCAGTTTTTAAGAAGAAAGCTAAAACTACTAAAAAAATTGTTCTTAAATTAGAATGTACCAAATGTAAAAAAAAAAGATTTCAAACCATGAAAAGATGTAAAACTTTTGAAATGGGAGCTGATAAGAAAAAGAAGGGAGGAGCAGTATATTGA	MVNVPKTRKTYCSNKCKKHTMHKVSQYKKGKERLSSLGRRRYDMKQKGFGGQTKPVFKKKAKTTKKIVLKLECTKCKKKRFQTMKRCKTFEMGADKKKKGGAVY	104	0	null	no	GO_0006412	GO_0006412	GO_0006412,GO_0006412	0	0	0	0	0	0	0	0	0	0	0	0	0	0	0	0	0	0	0	0	0	0	0	0	0	0	0	0	0	0	0	0	0	0	0	0	0
477	PF3D7_0312800	60S ribosomal protein L26, putative	null	ATGAAGTTTAACAAACAAAAATCATCTTCCCGAAGGAAAATGAGGAAAGCTCATTTTACTGCACCCGCAGGTCTAAGAAGAAAAATAATGTCATCAAAATTATCAAAAGAATTAAGATTAAAATATAAGACACGATCGTTGCCCGTTAGAAAAGATGATGAAGTTCTTATATGCAGAGGACACAACCATGGAAGAGAAGGAAAAGTTGTAAAAATAAACAGAAAAAGATATAAGATTTATGTAGAAAGAGTTACAAGAGAAAAAGTAAATGGAGAATCAACATTTATTGGTATTCATCCAAGTAATGTTGTATTAACAAAATTAAAGGTTGATAAAAATCGTAAAAAAATTTTAGATAGAAAAGCAGCAAAGGAAAATTAA	MKFNKQKSSSRRKMRKAHFTAPAGLRRKIMSSKLSKELRLKYKTRSLPVRKDDEVLICRGHNHGREGKVVKINRKRYKIYVERVTREKVNGESTFIGIHPSNVVLTKLKVDKNRKKILDRKAAKEN	126	0	null	no	GO_0006412	GO_0006412	GO_0006412,GO_0006412	0	0	0	0	0	0	0	0	0	0	0	0	0	0	0	0	0	0	0	0	0	0	0	0	0	0	0	0	0	0	0	0	0	0	0	0	0
520	PF3D7_0316800	40S ribosomal protein S15A, putative	null	ATGGTACGTATGAGCGTTTTAGCTGACTGTTTAAAAACCATAAACAATGCCGAGAAAAGAGGAAGGCGACAAGTTTTAATAAGACCCTCCTCAAAAGTTGTAATTAAATTTTTACAATATATGCAAAAGAAAGGATATATAGGAAGTTTTGAAATAGTCGATGATCATAGATCTGGAAAAATTGTTGTGAATTTGTTAGGAAGAATAAACAAATGTGCCGTTATATCGCCAAGATATGATGTTAAGCTTGATGAAATCGAGAAGATTATTACGAGCATATTACCCAGTAGACTTTTTGGTCATTTAATTTTAACAACACCCTACGGAATTATGGATCACGAAGAAGCTAGAAGAAAACACACCGGAGGAAAAGTGTTAGGTTTCTTCTTTTAA	MVRMSVLADCLKTINNAEKRGRRQVLIRPSSKVVIKFLQYMQKKGYIGSFEIVDDHRSGKIVVNLLGRINKCAVISPRYDVKLDEIEKIITSILPSRLFGHLILTTPYGIMDHEEARRKHTGGKVLGFFF	130	0	null	no	GO_0006412	GO_0006412	GO_0006412,GO_0006412	0	0	0	0	0	0	0	0	0	0	0	0	0	0	0	0	0	0	0	0	0	0	0	0	0	0	0	0	0	0	0	0	0	0	0	0	0
581	PF3D7_0322900	40S ribosomal protein S3A, putative	RPS3A	ATGGCAGTAGGAAAAAATAAAAGAACATCTAAGGGAAAAAAAGGTGGAAAAAAAAAAGTTACTGATGTTTTTACCAAAAAAGAATGGTATGACTTAAAGGCCCCAAAAATGTTTTTGGTCAGGAATTTTGGTAAAACCTTAGTCACAAAAACGATAGGAAAAAAATTGGCCACTGATAGTTTGAAGGGAAGAATTTACGAAGTAAACTTGGCCGACCTAAACAACGATGAAGATCAAGCCCATAAGAAAATCAAATTAAGTTGTGATCACATCATCAACAGAGATTGTTATACCGACTTTTGCGGATTAAGTATAACCAGAGATAAATTATGCTCTTTAATTAGAAAAGGATATACGTTAATAGAAGGACATACAGATGTAAAAACCTTAGATAATTAC…	MAVGKNKRTSKGKKGGKKKVTDVFTKKEWYDLKAPKMFLVRNFGKTLVTKTIGKKLATDSLKGRIYEVNLADLNNDEDQAHKKIKLSCDHIINRDCYTDFCGLSITRDKLCSLIRKGYTLIEGHTDVKTLDNYHLRMFCIAFTKKRQNQTKSTCYAQTSQIKKIRKKMVDIMTAEASKVLLKDLVKKFIPESIGKEIEKQCKKIYPLQNVLIRKVKILKRPKLDISKLMELHTDPKEESGKNVNALPESKEATNILTAELKH	262	0	null	no	GO_0006412	GO_0006412	GO_0006412,GO_0006412	0	0	0	0	0	0	0	0	0	0	0	0	0	0	0	0	0	0	0	0	0	0	0	0	0	0	0	0	0	0	0	0	0	0	0	0	0
708	PF3D7_0412100	30S ribosomal protein S12, mitochondrial, putative	null	ATGTTTTTTACCTTATCCAATAAGTTTAGTTATAAAAAAGGTACCCATGTAATTGTAAAATGTAATCCTTTTATTATAAATAATTTTTTCTTTAAAAAATGGATATATAAAATACCATATGATAAGAGTGAATTAATTTTTTCAAAAATGAAAAATGGGATAATCGGGGAAAATAAATATAATAACATATGTAGTAATCCTTTGTTAGAAGATAATCGTATTATAAGTATATCATATATGCATGATGATAAAATAATGAAAAATAAAACCCAAATAACAAACAATAATAATAATAATAATGATAATTATATTAATAATAATAATAATAATAATAATGGTATATTTATTAGTACACATACATCTTATCATTCCTATTTGTTCAACAGTGTAAAACGTTCA…	MFFTLSNKFSYKKGTHVIVKCNPFIINNFFFKKWIYKIPYDKSELIFSKMKNGIIGENKYNNICSNPLLEDNRIISISYMHDDKIMKNKTQITNNNNNNNDNYINNNNNNNNGIFISTHTSYHSYLFNSVKRSFSTKNIRGRLFYKRRPKQIPKLKKKNWRSKWLEGAPQKRGICLKVRVQTPKKPNSGLKKIARVRLSTGRIVSVYIPGIGHNLNTHSIILVRGGRCKDIPGCNYKAIRGVYDLLPVKNRFRGRSKYGVKLSEDKRKHLLERYNFKHITIKKDRDEFNKYKWFNYVDKDKKLREKPLDPEENVPINIFHFNTYYRNKKFQQNSDA	336	0	null	no	GO_0006412	GO_0006412	GO_0006412,GO_0006412	0	0	0	0	0	0	0	0	0	0	0	0	0	0	0	0	0	0	0	0	0	0	0	0	0	0	0	0	0	0	0	0	0	0	0	0	0
742	PF3D7_0415900	60S ribosomal protein L15, putative	null	ATGGGAGCTTATAAGTACATTCAAGAAATATGGAAAAAAAAGCAATCTGATGCTATGCATTTTTTGTTAAGAGTTAGAACATGGGAATATAGGCAACTCCCTGTTGTTCATAGAGTATCCAAACCCAGTAGACCAGATAAAGCACGTCGCTTAGGATATAAGGCCATACAAGGATTTGTGATTTATAGAGTACGTGTTAGAAGAGGTGATAGAAAAAAAAGAGTTAAAAAAGGTATTGTGCACGGGAAACCCAAACACCAAGGTGTTCACAAACAAAAATCAACAAGAAATTTAAAAAGTGTAGCTGAAGGAAAAGTTGGAAAAAGTATATGTGGAAATTTACGTGTTTTAAATAGTTATTGGGTAGGTCAAGATGCTGTTTATAAATATTATGAAGTT…	MGAYKYIQEIWKKKQSDAMHFLLRVRTWEYRQLPVVHRVSKPSRPDKARRLGYKAIQGFVIYRVRVRRGDRKKRVKKGIVHGKPKHQGVHKQKSTRNLKSVAEGKVGKSICGNLRVLNSYWVGQDAVYKYYEVILVDPNHNAVRNNPKINWICNPVHKHRELRGLTSAGKKYRGLRVKGHLSAKSRPSIRANWKRRQLIKLRKCR	205	0	null	no	GO_0006412	GO_0006412	GO_0006412,GO_0006412	0	0	0	0	0	0	0	0	0	0	0	0	0	0	0	0	0	0	0	0	0	0	0	0	0	0	0	0	0	0	0	0	0	0	0	0	0
802	PF3D7_0422400	40S ribosomal protein S19	RPS19	ATGGCTGAACAATTTACCGAAGATATTGGTGTTGTAAACAAAAGGTTGTTAGAACCAGTACCTTTTGTAAAAACAAATAATTGTATAAAAGATGTAGATGCAGATTTATTTATTAGATCATATGCGACTCACTTAAAATTACATAACAAAATAACATATCCTAAATGGTGTACCTTTGTGAAAACAGGAAAGGGTAGGAAATTAGCACCTTTAAATGAAGATTGGTATTTCATAAGAGCATCAAGTATTTTAAGAAGATTATATTTACATCCAGATATAGGAGTAGGATTTTTAAGAAGGCAATTTAGTTCTAAGCAAAGAAGAGGAGTAGCACCTAATCATACAAGTTTGGCTAGTGGAAAAATATTGAGATCGATTTTACAACAACTTGAAAATTTA…	MAEQFTEDIGVVNKRLLEPVPFVKTNNCIKDVDADLFIRSYATHLKLHNKITYPKWCTFVKTGKGRKLAPLNEDWYFIRASSILRRLYLHPDIGVGFLRRQFSSKQRRGVAPNHTSLASGKILRSILQQLENLGYVEQNPKKKGRRLTTKGENAINNFARYINKKVYNKE	170	0	null	no	GO_0006412	GO_0006412	GO_0006412,GO_0006412	0	0	0	0	0	0	0	0	0	0	0	0	0	0	0	0	0	0	0	0	0	0	0	0	0	0	0	0	0	0	0	0	0	0	0	0	0
861	PF3D7_0503000	50S ribosomal protein L28, apicoplast, putative	null	ATGCAAATCACAAATAAAATATATAAATTAATAAAATATGTATATATATTATATATAATTATTCACTCCAACTTTATATTTCCAAAAGTCATATTGACTCAGATTAATAAAAATAAAACGAATAATATATTAAAATATCCGAATTATTTTTATGTAATATCTTTATATAGAAAAAATGTAAGGTTTAAGAATAATAATGTTCTTAACAAGTCAGTTACCAAATTTGCTCTCAATACAAAAAAAAGGCACAAAGAAGCTTTAGCGATAAGAAAATATAGGATGACAGGACCCTCATCCATTAAAAAACATTATGGATTTGGAGCACATAAGAGAATTAACAAAGTCACCATGTTACCACACAAAGAAATAAAATTACCAATAAGAAGGTGCGCTATATTG…	MQITNKIYKLIKYVYILYIIIHSNFIFPKVILTQINKNKTNNILKYPNYFYVISLYRKNVRFKNNNVLNKSVTKFALNTKKRHKEALAIRKYRMTGPSSIKKHYGFGAHKRINKVTMLPHKEIKLPIRRCAILGKMDNWNARKISKSGVRTHRIQRLNLINKRIFFEEENRFIKMKVSAKGLKTIKKYGLAYCIKKFNLDFSKKKYDAGYSSRRRKKKTQELNQTNSERTNVTNENTQQSVEEVDKIMDKLNLDDKKIHKDL	262	1	null	no	GO_0006412	GO_0006412	GO_0006412,GO_0006412	0	0	0	0	0	0	0	0	0	0	0	0	0	0	0	0	0	0	0	0	0	0	0	0	0	0	0	0	0	0	0	0	0	0	0	0	0
868	PF3D7_0503800	60S ribosomal protein L31	RPL31	ATGGTTAAAGGTACTGTAAAAAAACAGAAGAAAACTTTAAAACCAGTTACTAAATTTATTACCATAAATTTGAGTAAATTAACTCATAAAGTATGCTATAAAAGAAAGGCACCAAGAGCCATTAAAGAAATTAGGAGCATAGCAGGAAAACTTATGCACACTAAGGATGTACGTTTAGATGTAAAATTAAACAAATTTATATGGTCTAAAGGTGTTAGAAACCCACCAAAAAGAGTTCGTGTAAAATTAGAAAGAAAAAGAAATGAAGATGAAGATTCAAAGGAAAAGATGTATACTATTGTTGAACATGTAATGGTAGATTCATATAAAGGTTTAGTTAATGAATGTGAAGCAAACGAATAA	MVKGTVKKQKKTLKPVTKFITINLSKLTHKVCYKRKAPRAIKEIRSIAGKLMHTKDVRLDVKLNKFIWSKGVRNPPKRVRVKLERKRNEDEDSKEKMYTIVEHVMVDSYKGLVNECEANE	120	0	null	no	GO_0006412	GO_0006412	GO_0006412,GO_0006412	0	0	0	0	0	0	0	0	0	0	0	0	0	0	0	0	0	0	0	0	0	0	0	0	0	0	0	0	0	0	0	0	0	0	0	0	0
900	PF3D7_0507100	60S ribosomal protein L4	RPL4	ATGGCTACCATAAGACCTGTTGCAAATGTTTATAGTACAAATGGAAAGAACGTCGTTGGCGAAGTAGAAATACCAGTCGTTTTTCAAACCCCAATTAGAAATGACTTAATACAAAGCGTATATACAAATATGTCAAAAAATAGGAGGCATCCATATGCTGTTAAATTAGGTGCTGGATATGAAACATCGGCTGAATCATGGGGTACTGGTAGAGCAGTAGCAAGAATTCCAAGAGTTCCAGGTGGAGGTACTCATAGAGCTGGTCAAGGTGCTTTTGGAAATATGTGTAGAGGTGGTGGTATGTTTAACCCAACAAAAATATGGAGAAGATGGGGAAGGAAAGTTAATTTGAAAGAAAAGAGATATGCCGTATGTTCATCTATTGCAGCTAGTGGTGTA…	MATIRPVANVYSTNGKNVVGEVEIPVVFQTPIRNDLIQSVYTNMSKNRRHPYAVKLGAGYETSAESWGTGRAVARIPRVPGGGTHRAGQGAFGNMCRGGGMFNPTKIWRRWGRKVNLKEKRYAVCSSIAASGVTSLVLARGHRISHLKEVPLVVSNDIESLSKTKEAVNFLVSLGLKDEVNRLVKSKKIRAGKGKMRNRKYKIRNGPLIIYENDNGVKKAFRNIPGVDLCKVTKLNLLKLAPGGSIGRLCIWSESAFKKLDVIYGKIHEKKVTKKNYILPKSIVHNPDIYRIIHSDKVQASLLAKKKPCKKRLQNKNSLTNFAVRCRLNPAYKLLRSLAVLRMRKSILEKSKNKKEKRVQKQIQKKELQKINHDYYKGVAKAVKKKKKREEKKAKSKKT…	411	0	null	no	GO_0006412	GO_0006412	GO_0006412,GO_0006412	0	0	0	0	0	0	0	0	0	0	0	0	0	0	0	0	0	0	0	0	0	0	0	0	0	0	0	0	0	0	0	0	0	0	0	0	0
988	PF3D7_0516200	40S ribosomal protein S11	RPS11	ATGGCATCAAAAAAAGTAAAAACACCTCAACCTGAAACAGCTATTGTTTCTGGTCCTCAACCAAAAGAAGGAGAATTAGTTTTTGGTGTGGCTCATATTTTTGCATCTTTTAACGATACATTTATACACGTAACAGATTTAAGTGGAAGAGAAACTTTAGTTAGAATTACAGGTGGAATGAAAGTTAAAGCTGATAGAGATGAATCTAGTCCATACGCTGCTATGATGGCTGCTCAAGATGTAGCTGCAAGGCTAAAAGAATTAGGAGTTACAGCTATCCATATTAAACTAAGAGCCTCCGGTGGTACTAAATCTAAGACCCCTGGTCCAGGAGCCCAATCAGCCTTAAGAGCTTTAGCACGTTCCGGATTAAAAATAGGAAGAATTGAAGATGTAACT…	MASKKVKTPQPETAIVSGPQPKEGELVFGVAHIFASFNDTFIHVTDLSGRETLVRITGGMKVKADRDESSPYAAMMAAQDVAARLKELGVTAIHIKLRASGGTKSKTPGPGAQSALRALARSGLKIGRIEDVTPIPTDSTRKKSGRRGRRL	151	0	null	no	GO_0006412	GO_0006412	GO_0006412,GO_0006412	0	0	0	0	0	0	0	0	0	0	0	0	0	0	0	0	0	0	0	0	0	0	0	0	0	0	0	0	0	0	0	0	0	0	0	0	0
995	PF3D7_0516900	60S ribosomal protein L2	RPL2	ATGGGAAGAGTTATAAGAGGTCAAAGGAAGGGTAGAGGCTCTATTTTCAAGTCTCATAATCATCATAGAAAGGGCGCAGCAAAATTACGCCATTTAGATTATTGTGAAAAAAAAGGATATATAAAGGGTTTGGTAAAGGATATCATACATGACCCAGGAAGAGGTGCTCCTTTAGCCAAGGTAATATTTAAAAGAACAGAAAAGTATGGAAAGAAAGAAGAATTAATTATAGCTTCAGAAGGTATGTTTACTGGTCAATATATTTCATGTGGTACGAAAGCCCCCTTATCAGTAGGTAATATTTTACCTATTGGAAAAATGCCTGAAGGTACCTTAATATGTAACTTAGAACATAGAACAGGAAATAGAGGAACCTTAGTAAAAGCTTCCGGATGTTAT…	MGRVIRGQRKGRGSIFKSHNHHRKGAAKLRHLDYCEKKGYIKGLVKDIIHDPGRGAPLAKVIFKRTEKYGKKEELIIASEGMFTGQYISCGTKAPLSVGNILPIGKMPEGTLICNLEHRTGNRGTLVKASGCYATVVGQSEDGKKTKVRLPSGAKKTIDAKARAMVGVVGAGGRIDKPILKAGVAHHKYRVKRNCWPKVRGVAMNPVEHPHGGGNHQHIGHPSTVSRSAPAGQKVGLIAARRTGLLRGAKKTKLVGKSEE	260	0	null	no	GO_0006412	GO_0006412	GO_0006412,GO_0006412	0	0	0	0	0	0	0	0	0	0	0	0	0	0	0	0	0	0	0	0	0	0	0	0	0	0	0	0	0	0	0	0	0	0	0	0	0
1051	PF3D7_0522500	50S ribosomal protein L17, apicoplast, putative	RPL17	ATGAAGATATGGATATTATTTTTTTTGTTTTGTAAGAGCGTGTTGAATTTTAAATTGAAACAAAATGTGTCAAATATTTATATAATGAATAGAGAGCCCTTAAAATATATATCAAATAAAAGAAATACTTCATTATTGGCACATACAAATAAAAATTTCAGGAAATTAGGAAGGGATAGAGCTCAAAGGAGAGCTCTTCTAAGGGCATTAACAACTAGTTTACTGAGGTATGGTAAAATAGTAACGACTGAAGCAAAAGCAAAGGAGACTAGAAGAAAAGTTGATAGAATAATAACATATGCTAAAAAGCATGATAACAATAGGCAGTACGCTTATAGATTGATAGCTAATTATGTTTATGATAGAGAATTGGCCCTTAACGTAGTTAAACAGGCCCCT…	MKIWILFFLFCKSVLNFKLKQNVSNIYIMNREPLKYISNKRNTSLLAHTNKNFRKLGRDRAQRRALLRALTTSLLRYGKIVTTEAKAKETRRKVDRIITYAKKHDNNRQYAYRLIANYVYDRELALNVVKQAPVRYKERHGGYTKIKLLPKSRKGDASRMAMLELL	166	0	HMM: MKIWILFFLFCKSV, NN: MKIWILFFLFCKSVLNF	yes	GO_0006412	GO_0006412	GO_0006412,GO_0006412	0	0	0	0	0	0	0	0	0	0	0	0	0	0	0	0	0	0	0	0	0	0	0	0	0	0	0	0	0	0	0	0	0	0	0	0	0
1072	PF3D7_0524600	50S ribosomal protein L12, apicoplast, putative	null	ATGAAAAGTGTAGGAAGTAAAGTTACTAAATTGATAGGAAAGATATTATGTAAAAACGAAAAGAAAAATAGAAGAAGAAAAAATAATAAGACGAAAGATTGTTCATTATTTTTTATAATAAAAAAACAAAGTTGTCCATTGTTATATATTATTTTGTCCATATTATATATAACATATTGTATGGAATGTATTGTATGTATGAAATTATCGAAGAATGACAATTGCTTAAATAGAAATAAATATTTTTTTCTTGAATATAAATTAAATAATGATTATTATGGAAAGAAAAGTTATGTAAATAATATAAGAAAACATATTTCAAAAAAAGATAATGTTATTAATAATCACAAAAATTTTAAATTAAAAAGTTCAAAGGTTGATGAAATTATAGAAAGTTTA…	MKSVGSKVTKLIGKILCKNEKKNRRRKNNKTKDCSLFFIIKKQSCPLLYIILSILYITYCMECIVCMKLSKNDNCLNRNKYFFLEYKLNNDYYGKKSYVNNIRKHISKKDNVINNHKNFKLKSSKVDEIIESLKNLTLLEASELVKKIELTFSVDTKQNLNASNSSGQENKQNESDGKENEEDEENKVYDLILENIEPNKKIPIIKIVKEIKKDLNLKQAKDLVDNLPQTLFEKVNKETADKWKTKLTEAGGIVKLK	257	1	null	no	GO_0006412	GO_0006412	GO_0006412,GO_0006412	0	0	0	0	0	0	0	0	0	0	0	0	0	0	0	0	0	0	0	0	0	0	0	0	0	0	0	0	0	0	0	0	0	0	0	0	0
1191	PF3D7_0605000	50S ribosomal protein L24, putative	null	ATGTTTTGGTCTTCATTTATAGGAAAAATTAATCAACTGCCAGTTTTGAGCCAGTTAAATAATTCTTTTTTGAAACATGTGAGCGTCAGAAATCATAAAATTATTAAACCAAGAAATATTATTAAGATGTGGAAAATAAGGAAAGGAGATGAAGTGAAAGTCATATCTGGAAAAGATAAAGGAAAAATAGGAGAAGTATTAAGTTGTGACAAATTTAGGAATATGGTAAAAGTCAAAGGATGTAATATGAGGAAACTTTTTGTTGATAATAAATTCGTTTATATTGAAAAAAAAATACATTATTCAAATGTTCAATTAATAGATAACTTTTTAAAAACAAATACAAAGGTAGCCTTAAGATATACAGATGATAATCAAGTTATTAGAATATCAAAAAAA…	MFWSSFIGKINQLPVLSQLNNSFLKHVSVRNHKIIKPRNIIKMWKIRKGDEVKVISGKDKGKIGEVLSCDKFRNMVKVKGCNMRKLFVDNKFVYIEKKIHYSNVQLIDNFLKTNTKVALRYTDDNQVIRISKKSGTVIPWPSEKTKEEDYDQIEENPLDTLPQEALKKTYDYKTDVKFMNILRQTVNKYNRELS	194	0	null	no	GO_0006412	GO_0006412	GO_0006412,GO_0006412	0	0	0	0	0	0	0	0	0	0	0	0	0	0	0	0	0	0	0	0	0	0	0	0	0	0	0	0	0	0	0	0	0	0	0	0	0
1288	PF3D7_0614500	60S ribosomal protein L19	RPL19	ATGTCACTCACATTACAAAAAAGATTAGCAGCTTCTGTTTTAAAATGTGGAAAGAATAAAATATGGATGGACCCAAATGAAATTAGCGAAATTTCATTAGCTAATTCAAGGTTTAGCATAAGAAAATTATATAAAGAAGGATTGATTTTAAAAAAGCCCCAAAAAGTTCATAGCAGAGCTAGGGTTAGATTATATAAGCTAGCCAAAAGAAAAGGTAGACATATGGGTATCGGTAAAAGAAAGGGTACCAAAAACGCAAGAACAAATCAAAAAACATTATGGATAAAGAGACAACGTGTTCTTAGAAGATTATTAAAAAGATTAAGAGACTCCAAAAAGGTAGATAGACATTTATATCACTCCTTTTATTTAAAATGTAAGGGAAACCAATTTAAAAAT…	MSLTLQKRLAASVLKCGKNKIWMDPNEISEISLANSRFSIRKLYKEGLILKKPQKVHSRARVRLYKLAKRKGRHMGIGKRKGTKNARTNQKTLWIKRQRVLRRLLKRLRDSKKVDRHLYHSFYLKCKGNQFKNKRTLIEAIQREKNETLKKKAIADQLEAKRLKAQVLRNKRKLKKDKEVVA	182	0	null	no	GO_0006412	GO_0006412	GO_0006412,GO_0006412	0	0	0	0	0	0	0	0	0	0	0	0	0	0	0	0	0	0	0	0	0	0	0	0	0	0	0	0	0	0	0	0	0	0	0	0	0
1626	PF3D7_0718400	mitochondrial ribosomal protein S8 precursor, putative	null	ATGCAGAGAGCATGTGAAATGGTTGTATCTTTATTACGAACAGATTCCATGACTCAAAAATGTCCATTCCATGTTTTGAATGTTCAAATTTTGGAATTATTACAAAAAGAAGGACTTATCAGAGGTTTCTCTATTAAAGGCACAAAAATAGATATACTACTAAAGCATTATAAAGGAGCACCAGTCATTAGAAATATCCGAGTTGTTTCAAAACCTAGTCGAGATATTTGGTTAACTCCTCATGAACTTAAATTTCGGACGAGATTTAACACGGGCCTTTGGGTTATGCAAACTAGCTGTGGTGTTATCAGTCATAGGGATTGTGTTCGCATGGGAATCGGAGGGAAAATGTTATTTGCTGTAAATAATGGATATCAACATTTTTGTTAA	MQRACEMVVSLLRTDSMTQKCPFHVLNVQILELLQKEGLIRGFSIKGTKIDILLKHYKGAPVIRNIRVVSKPSRDIWLTPHELKFRTRFNTGLWVMQTSCGVISHRDCVRMGIGGKMLFAVNNGYQHFC	129	0	null	no	GO_0006412	GO_0006412	GO_0006412,GO_0006412	0	0	0	0	0	0	0	0	0	0	0	0	0	0	0	0	0	0	0	0	0	0	0	0	0	0	0	0	0	0	0	0	0	0	0	0	0
1638	PF3D7_0719600	60S ribosomal protein L11a, putative	null	ATGGAAAACAAAGAACAAAATGTTATGAGAGAAATTAAAGTGAACAAATTGGTGCTCAATATCTGTGTTGGAGAATCGGGTGATAGGCTAACAAGAGCAGCAAGAGTGTTGGAACAACTAACTGAACAGAAGCCAATATTTGGAAAATGTCGATTTACCATAAGATCCTTTGGTGTTAGAAGAAATGAAAAGATATCATGTTTTGTAACAGTACGAGGAAAGAAAGCTTTAGAAATATTAGAGAAAGGGTTAAAAGTAAAAGAATATGAATTAAGAAGAAAGAATTTTTCGGATACAGGAAATTTCGGATTCGGTATTCAAGAACATATTGATTTAGGTATAAAATATGATCCTTCCACAGGTATATATGGTATGGATTTTTATGTTCATTTATCAAGG…	MENKEQNVMREIKVNKLVLNICVGESGDRLTRAARVLEQLTEQKPIFGKCRFTIRSFGVRRNEKISCFVTVRGKKALEILEKGLKVKEYELRRKNFSDTGNFGFGIQEHIDLGIKYDPSTGIYGMDFYVHLSRSGYRVTRRTRRRSKISKTHKVTKEDAMKWFQTKFDGILLK	173	0	null	no	GO_0006412	GO_0006412	GO_0006412,GO_0006412	0	0	0	0	0	0	0	0	0	0	0	0	0	0	0	0	0	0	0	0	0	0	0	0	0	0	0	0	0	0	0	0	0	0	0	0	0
1658	PF3D7_0721600	40S ribosomal protein S5, putative	null	ATGGAAACAACAACGGCTGATATAAAACTTTTTAAAAAATGGTCATATGAAGAGATCAATATTGCTGACTTATCTTTGGTGGATTGTATAGCTGTATCACAAAAGGCATGTGTTTATACACCACATACCGCTGGACGTTATCAAAAGAAAAGGTTTAGAAAGGCCTTATGTCCAATTGTAGAAAGATTGGTTAATTCTATGATGATGCATGGAAGGAATAATGGAAAAAAATTAAAAGCAATAAGAATCGTAGCTTATGCTTTTGAAATTATTCATTTAATGACAGGAGAAAACCCTCTACAAGTTTTTGTAAATGCAGTACAAAAAGGTGGACCCAGAGAAGATTCAACAAGAATTGGATCAGCAGGTGTTGTTAGAAGACAAGCAGTTGATGTTTCT…	METTTADIKLFKKWSYEEINIADLSLVDCIAVSQKACVYTPHTAGRYQKKRFRKALCPIVERLVNSMMMHGRNNGKKLKAIRIVAYAFEIIHLMTGENPLQVFVNAVQKGGPREDSTRIGSAGVVRRQAVDVSPLRRVNQAIYLICTGARNAAFRNIKSISECLAEEIINCANESSSSYAIKKKDEIERVAKANR	195	0	null	no	GO_0006412	GO_0006412	GO_0006412,GO_0006412	0	0	0	0	0	0	0	0	0	0	0	0	0	0	0	0	0	0	0	0	0	0	0	0	0	0	0	0	0	0	0	0	0	0	0	0	0
1853	PF3D7_0810100	apicoplast ribosomal protein L33 precursor, putative	null	ATGAAACCATGTGATCTTTTCATTTACTTATTTTTGTATATTTTTATAATAATGAAATGTTATGATTTTTTCATAATTCCAAAGAATATGAAAATGGTTAAGAATCCTATTTATCAAAATAGATATACAGACAATAAAAGAAATGCACTTTTATATGCAAAAAAAAAAAGGAACAGAAAAGTAGTGATATTAGAATGTACTGAAGCAAGAAAATTGGGAAAGCAGCCATCAAGATATGTAACGGAAAAAAATAAAAATAATACTCCAAAAAAATTACAATTATATAAATACAATAAATATCTTAAAAGAAGAACATTACACGTTGAAATAAAATAG	MKPCDLFIYLFLYIFIIMKCYDFFIIPKNMKMVKNPIYQNRYTDNKRNALLYAKKKRNRKVVILECTEARKLGKQPSRYVTEKNKNNTPKKLQLYKYNKYLKRRTLHVEIK	111	1	HMM: MKPCDLFIYLFLYIFIIMKCY, NN: MKPCDLFIYLFLYIFIIMKCY	yes	GO_0006412	GO_0006412	GO_0006412,GO_0006412	0	0	0	0	0	0	0	0	0	0	0	0	0	0	0	0	0	0	0	0	0	0	0	0	0	0	0	0	0	0	0	0	0	0	0	0	0
1893	PF3D7_0813900	40S ribosomal protein S16, putative	RPS16	ATGACAACAAAAGTAAAAAGAGTTCAAACATTCGGCAAAAAGAAAACTGCCGTTGCTGTAGCAACAGTAACCAATGGTAAAGGGTTAATAAAATTAAACGGTAAGAATTTAGATTTAGTTGAACCCTATATTTTAAAAACTAAAGTATATGAACCCTTATGGTTAATTGGATCAGGCAAATTAAAAAATTTAGATATCCGTATAAGAGTTAAGGGTGGTGGTCAAACTTCTCAAATATATGCTATACGTCAAGCTATTGGTAAAGGAATAATTTCTTATTATCAAAAATATGTAGATGAATCAACTAAAAAAGAATTAAAAGATGTCTTGTTAAGATATGACAGATCATTGTTAGTAGGAGACACAAGAAGATGTGAACCCAAAAAATTTGGTGGAAAG…	MTTKVKRVQTFGKKKTAVAVATVTNGKGLIKLNGKNLDLVEPYILKTKVYEPLWLIGSGKLKNLDIRIRVKGGGQTSQIYAIRQAIGKGIISYYQKYVDESTKKELKDVLLRYDRSLLVGDTRRCEPKKFGGKGARARYQKSYR	144	0	null	no	GO_0006412	GO_0006412	GO_0006412,GO_0006412	0	0	0	0	0	0	0	0	0	0	0	0	0	0	0	0	0	0	0	0	0	0	0	0	0	0	0	0	0	0	0	0	0	0	0	0	0
1894	PF3D7_0814000	60S ribosomal protein L13-2, putative	null	ATGGTTGCCCATAATAACGTTTTACCAAATGTACATCTTCATAAATGGTGGCAAAGGCATGTAAGAGTTAACTTTAGTAAAAATATAAAAAAAAAAAAAAGAAGATTGTTGAGAGAAAAAAGAAGAAAAGCTAATGGAGGTACTCCTATTGAAAAATTACACCCAATTGTACACTGTCCAACTCAAAGATATAATTTTAGAACTAGGCTAGGAAAAGGATTTACCTTTGAAGAGTTAAAGGGAGCCGGATTAACTCCTAGAGCTGCACAAACTATAGGTATATGCTATGACAAAAGAAGAAAAAACAGATCTGAAGAATCCTTGACAAAAAATGTCGAAAGATTATTAAAGTATAAGAACAGTTTAGTTATGATCCCACTTAAGAAAAACAAAGCAAAG…	MVAHNNVLPNVHLHKWWQRHVRVNFSKNIKKKKRRLLREKRRKANGGTPIEKLHPIVHCPTQRYNFRTRLGKGFTFEELKGAGLTPRAAQTIGICYDKRRKNRSEESLTKNVERLLKYKNSLVMIPLKKNKAKKGIGGIPADADKNTIKEFRNKKPLLSIFKKEKNTKPFYETIEVSKIDKEFLAYKTLRRAKLAERRKNRRQQKKDIKFKSKDN	215	0	null	no	GO_0006412	GO_0006412	GO_0006412,GO_0006412	0	0	0	0	0	0	0	0	0	0	0	0	0	0	0	0	0	0	0	0	0	0	0	0	0	0	0	0	0	0	0	0	0	0	0	0	0
2027	PF3D7_0827500	apicoplast ribosomal protein L21 precursor, putative	null	ATGTTTTTTTTTTCGAGTAAAAATAAATCATTTTTGCTATGGGCAAGTTTTATGCTTATATATTTTACTAACATATCAATATACGTAAGCAAAATACATCATCATGGTTTGAATAAAAAAATATATAATTTAAATTTTGTGAGTAATGTATTTAAGTATAATGCAAGAAGGAGAGGTAATTCATTAAATGTTTTAATCAATTCTCCAGCACAAGTAAAATTATCCGAAATGGAAGATGCTAAAGATAGAAGTGGGAAATATTGTATTATAGAAATATGTGGGAAAATTAGATGGGTAGAAGAAGGTCGGTTTTATGATGTATTTAGAATAAAACAAGAAGAAAATAGAAATATATATTTGAATAGAATTTTATTTTATAGTAATGAAGAGGGGAATATA…	MFFFSSKNKSFLLWASFMLIYFTNISIYVSKIHHHGLNKKIYNLNFVSNVFKYNARRRGNSLNVLINSPAQVKLSEMEDAKDRSGKYCIIEICGKIRWVEEGRFYDVFRIKQEENRNIYLNRILFYSNEEGNIFFGRPFLDNVRIHATVLNHFRGHKIYRLKYKPKKNYKRFYGHRQEMTRIKINKIEYNNELLGQEKRIYNFFKDDSLYYILNRIHNIVRPSLELKHLKKNFIEYINSFCSLKFETFYKHKGNYKKEKMLRNILKTKKLSKRPEVIEEVKKIEEEKKKQRLTKCDPLDDFDPVVNEFMIKEHFYS	316	1	HMM: MFFFSSKNKSFLLWASFMLIYFTNISI, NN: MFFFSSKNKSFLLWASFMLIYFTNISIYVSK	yes	GO_0006412	GO_0006412	GO_0006412,GO_0006412	0	0	0	0	0	0	0	0	0	0	0	0	0	0	0	0	0	0	0	0	0	0	0	0	0	0	0	0	0	0	0	0	0	0	0	0	0
2495	PF3D7_1003500	40S ribosomal protein S20e, putative	null	ATGAGTAAATTAATGAAAGGAGCTATTGATAACGAGAAGTATAGGCTTCGTCGTATTCGTATTGCTTTAACATCCAAAAACTTAAGAGCCATAGAAAAAGTATGCAGTGATATAATGAAAGGAGCTAAAGAAAAAAATTTGAATGTATCAGGACCTGTAAGATTACCAGTAAAAACCTTAAGAATAACTACCAGAAAATCACCATGCGGAGAAGGTACAAATACATGGGATAGATTTGAATTAAGAATATATAAAAGACTTATTGATTTATATTCACAATGTGAAGTTGTTACTCAAATGACATCCATCAATATCGATCCAGTTGTCGAAGTAGAAGTTATTATAACTGATTCTTAA	MSKLMKGAIDNEKYRLRRIRIALTSKNLRAIEKVCSDIMKGAKEKNLNVSGPVRLPVKTLRITTRKSPCGEGTNTWDRFELRIYKRLIDLYSQCEVVTQMTSINIDPVVEVEVIITDS	118	0	null	no	GO_0006412	GO_0006412	GO_0006412,GO_0006412	0	0	0	0	0	0	0	0	0	0	0	0	0	0	0	0	0	0	0	0	0	0	0	0	0	0	0	0	0	0	0	0	0	0	0	0	0
2500	PF3D7_1004000	60S ribosomal protein L13, putative	null	ATGTATAAGAAGGAATATGTTATCGATTGCAAAGGTCACCTATTAGGAAGGTTGGCATCTCTTATAGCAAAGGAATTATTAAATGGTCAAAGAATAGTAGCCGTAAGATGTGAAGATATAAACATCTCAGGAAGTTTATATAGGAATAAGCTTAAGTATCAAGAATTTTTAAGATTAAGAACTAACACTAATCCTAAAAAAGGACCTTTACATTTAAGAGAACCCTCAAAAATTTTGTGGAGATGTGTACGTGGTATGTTACCACATAAAACATATAAAGGACAACTTGCCTTAAAGAAATTGAAAGTATGTGTTGGTATGCCATATCCATATGATAAGAAAAAGAAATACGTTTTACCAAGTGCTCTTAGAGCTTTCCGTTTAAAAAAACACAGAAGA…	MYKKEYVIDCKGHLLGRLASLIAKELLNGQRIVAVRCEDINISGSLYRNKLKYQEFLRLRTNTNPKKGPLHLREPSKILWRCVRGMLPHKTYKGQLALKKLKVCVGMPYPYDKKKKYVLPSALRAFRLKKHRRYCRLGTLSSRVGWNYDTLVKKNEVLRKQVSKAYYKKKVNNLNEKKEIKTEALNLINPEQRQVLENFGYA	202	0	null	no	GO_0006412	GO_0006412	GO_0006412,GO_0006412	0	0	0	0	0	0	0	0	0	0	0	0	0	0	0	0	0	0	0	0	0	0	0	0	0	0	0	0	0	0	0	0	0	0	0	0	0
2732	PF3D7_1026800	40S ribosomal protein S2	RPS2	ATGAGTAACAAAAAAGGTCAATCCCCCAAAGAAGAGAGCATTGCTAAGATGCTTATATGTAAAGTGCATATAGGTACAAAAAATTTAGAGAACAAGATGAAAAGATACGTTTATACGAGAGCAAAGGATGGTGTACATATTATAAACTTAGCGAAGACATATGAGAAATTACAGCTTGCTGCACGAATTATCGTAGCTATAAGCAACCCAGCAGATGTAGTAGTTGTATCAGCAAGACCTTTTGGAAGTAGAGCTGTGTTAAAATTTGCTCAGTATACAGGAGCACAAGCCATAGCCGGTAGATGGACTCCTGGTATGTTAACAAATCAAATTATCCAAAAATTTACAGAACCAAGATTATTAATTGTAACGGATCCAAGAACAGATGCACAATCGGTT…	MSNKKGQSPKEESIAKMLICKVHIGTKNLENKMKRYVYTRAKDGVHIINLAKTYEKLQLAARIIVAISNPADVVVVSARPFGSRAVLKFAQYTGAQAIAGRWTPGMLTNQIIQKFTEPRLLIVTDPRTDAQSVKESAYANIPVIALCDSDSPLEHVDIAIPCNNKGKESIALMYWLLAQEVLYLKGVIPRSEPWNVMVDMFLWRDPEQFELKNLANEENTPTAPHLIENQYAAEAPYDEWTKKEEWNDNTNEDWKNPIAAEEW	263	0	null	no	GO_0006412	GO_0006412	GO_0006412,GO_0006412	0	0	0	0	0	0	0	0	0	0	0	0	0	0	0	0	0	0	0	0	0	0	0	0	0	0	0	0	0	0	0	0	0	0	0	0	0
2743	PF3D7_1027800	60S ribosomal protein L3	RPL3	ATGTCACATCGTAAATTTGAAAGGCCACGTCACGGTTCCTTAGGTTTCTTACCCAGGAAAAGATGCAAAAGATTAAGAGGAAAAATTCGATCCTTTCCAAAAGATGATAAAGAGAAGCCTCCACATTTTACAGCATTTATGGGATATAAAGCTGGTATGACACATATTGTTAGAGAAGTAGATAAACCCGGTTCAAAATTACATAAAAAAGAAATTGTAGAAGCATGTACTATTATTGAATGTGCTCCTATGGTAGTTGTTGGTATTGTAGGATATAGAGAAACCCCAAAGGGTTTACGTATCTTAAGTACTGTATGGGCTAATCATGTTTCTGATGAATTTAGAAGAAGATATTATAAGAACTGGTACAAATCCGAGAAAAAAGCTTTTACAAAATCA…	MSHRKFERPRHGSLGFLPRKRCKRLRGKIRSFPKDDKEKPPHFTAFMGYKAGMTHIVREVDKPGSKLHKKEIVEACTIIECAPMVVVGIVGYRETPKGLRILSTVWANHVSDEFRRRYYKNWYKSEKKAFTKSLNVPEATKNCLLKRIEKYCTVLRAICHTQPSKTPLRMKKAHIMEVQINGGSMKEKLEFVKEMLEKNLPVSTVFNPNEMIDVISVTKGHGTKGVVSRYGVKRLPRKTHRGLRKVACIGAWHPARVQFQIPRHGQKGYFHRTERNKKIYRIGLKTDKNSASTDADITEKKITPMGGFPHYGVVNEDFLLLKGCVAGTKKRPITLRKNIVPQVSRDALAQVSLKFIDTSSKIGHGRFQTSEEKVKYYGPLKKDLKA	386	0	null	no	GO_0006412	GO_0006412	GO_0006412,GO_0006412	0	0	0	0	0	0	0	0	0	0	0	0	0	0	0	0	0	0	0	0	0	0	0	0	0	0	0	0	0	0	0	0	0	0	0	0	0
2808	PF3D7_1034200	apicoplast ribosomal protein L27 precursor, putative	null	ATGAAAAATAAGGTTGTCATAATTTACTTTTTAGTATACATTACATATGTCATATTAGCTAAGTCAAAAAATGACCTTAAAGTTACGAAGGCATATTTAAGATATGGAAAGAATGATCAAAATATTCAAAATAGGAAACGAGAAAAAAGAACTCATATGTATTTGAATAACTCCAGTTTGTTGTCATCAAAGAATAATAATATGAATAAAACATTTTTCAAATATAATAAATTTATTGATCAAAATAATGACAAAGAATATTTTATGAAAACTTTTTTTAAAAATGGGAATATAATAAAATTTAGATATACTCATGAATTGTGGGCAAAAAAAAAAGGAGTAGGAAGTAGTCGAAATGGTAGAGATAGTAATCCAAAGAATTTGGGAGTGAAAGTATTA…	MKNKVVIIYFLVYITYVILAKSKNDLKVTKAYLRYGKNDQNIQNRKREKRTHMYLNNSSLLSSKNNNMNKTFFKYNKFIDQNNDKEYFMKTFFKNGNIIKFRYTHELWAKKKGVGSSRNGRDSNPKNLGVKVLGNNFAHAGNIIVRQRGRTFKPGNGVKQGRDFTLIAVKSGKVHFFNRVVSIIDVSEPKPLTFKDIYQENPTIIGLSKMWMSA	214	1	HMM: MKNKVVIIYFLVYITYVILAK, NN: MKNKVVIIYFLVYITYVILAKSK	yes	GO_0006412	GO_0006412	GO_0006412,GO_0006412	0	0	0	0	0	0	0	0	0	0	0	0	0	0	0	0	0	0	0	0	0	0	0	0	0	0	0	0	0	0	0	0	0	0	0	0	0
2957	PF3D7_1109900	60S ribosomal protein L36	RPL36	ATGGGAAGGAAATCAACCATTAAGCCAGCCACAGGAATAGCAGTTGGATTTAATAGTGGACATGTTGTAACAAAGAGAAATTTAAAATTACATAAGAAAAAGAAACCATTTTCTAAAAGAAAAGAATTGATAAAAGATGTCGTTAGAGAAATTACTGGATTTAGTCCATATGAAAAAAGAATAATTGAATTGATAAAAATAGGTACATCTGCTTCTACTAAAAGAAGTTTAAAATACGCTAAAAAAAAGTTAGGAACCCATAAAAGAGGAAAAGCTAAGAGAGAAGAAATTCAAAAAGTCGTTATTTTACAAAGAAGAAAAGCTGCTGAAAAACATTAA	MGRKSTIKPATGIAVGFNSGHVVTKRNLKLHKKKKPFSKRKELIKDVVREITGFSPYEKRIIELIKIGTSASTKRSLKYAKKKLGTHKRGKAKREEIQKVVILQRRKAAEKH	112	0	null	no	GO_0006412	GO_0006412	GO_0006412,GO_0006412	0	0	0	0	0	0	0	0	0	0	0	0	0	0	0	0	0	0	0	0	0	0	0	0	0	0	0	0	0	0	0	0	0	0	0	0	0
2964	PF3D7_1110600	mitochondrial ribosomal protein L11 precursor, putative	null	ATGTCCAGAATAGGAAGATTTAATTTAATCGTTTTGTCTGGTACGGCAAAACCAAGCGCAAGTATTGGACAAACCCTGGGACCACTAGGTATAAATATGATGACGTTTTTTAAAGAATTCAATGATAGAACGAAATGTATAGCCAAAAATGTACCAATACAAGTTACATTAGAACCTTTAAACGATAGAACGTATAGATTTTATTTAAGAACACCTACTGTTGTGTGGTTTATTAGAAGATGTGCAAGAGTTCCTATGTTTAGCTCTATGGCAAAACATAATACTGTTGGTTCCATAACCCTAGCTGAAGTTTTTCATATTGCCAAGTGTAAACGTATGGATCCACCTTTGATAAATTTATCCTTAAAGAGTATATGTAAATATATTATTGGAACATGC…	MSRIGRFNLIVLSGTAKPSASIGQTLGPLGINMMTFFKEFNDRTKCIAKNVPIQVTLEPLNDRTYRFYLRTPTVVWFIRRCARVPMFSSMAKHNTVGSITLAEVFHIAKCKRMDPPLINLSLKSICKYIIGTCNSMGIRVCKELNDEEKKKYFVDVNKLDNIKKDIRTRNKQQKRSKK	178	0	null	no	GO_0006412	GO_0006412	GO_0006412,GO_0006412	0	0	0	0	0	0	0	0	0	0	0	0	0	0	0	0	0	0	0	0	0	0	0	0	0	0	0	0	0	0	0	0	0	0	0	0	0
3109	PF3D7_1124900	60S ribosomal protein L35, putative	RPL35	ATGAGTAATGTTAAAGCTTATGAATTAAGGACCCTCAAGAAAAAAGAATTATTAGATAAATTAGATGAATTGAAAAAGGAGTTAAGTGGCTTAAGAATAAGCAAAGCCTTAGGGAACTCTGCTAAGAATTCCAAAATCCACGGCGTCAGGAAAAATGTGGCAAGAGTTTTGACAGTTTATAATCAAAAAAGAAAAATGGAATTGAGACAATTATACAAAAATAAAAAATTCAAACCATATAATTTAAGAAAAAAGTTGACAAAAAATAAAAGACTTCAATTATCTCCCAAACAAAAAGCAGCCATGACCTTAAGACAAAAAAAAAAAGTACAAAATTTCCCACAAAGAAAATACCTCGTTGTACACAAGGAATAA	MSNVKAYELRTLKKKELLDKLDELKKELSGLRISKALGNSAKNSKIHGVRKNVARVLTVYNQKRKMELRQLYKNKKFKPYNLRKKLTKNKRLQLSPKQKAAMTLRQKKKVQNFPQRKYLVVHKE	124	0	null	no	GO_0006412	GO_0006412	GO_0006412,GO_0006412	0	0	0	0	0	0	0	0	0	0	0	0	0	0	0	0	0	0	0	0	0	0	0	0	0	0	0	0	0	0	0	0	0	0	0	0	0
3122	PF3D7_1126200	40S ribosomal protein S18, putative	RPS18	ATGTCACTACAAGTAATAGATAATAATGATTTTCAACATATATTAAGAATTTTAAATACAAATGTAGATGGTAAAGAAAAAGTAATTATTGCCTTAACAGCTATTAAAGGTATTGGAAAGAGAATGGCAACTGTTATATGTAAACAAGCAAATGTTGACCCCACGAAAAGAGCAGGAGAATTAACTACTGAAGAAATAGATAATATCGTACATATTATGAGTACTCCTACCCAATTTAAAATCCCTGATTGGTTTTTAAACAGGAGAAAGGATTTGAAAGAAGGAAAAAATATTCATGTTATTGCTAACCAACTTGATTCTTACTTACGTGAAGATTTAGAAAGAATGAAGAAAATTAGATTACACAGAGGTTTACGTCATCACTGGGGATTAAGAGTT…	MSLQVIDNNDFQHILRILNTNVDGKEKVIIALTAIKGIGKRMATVICKQANVDPTKRAGELTTEEIDNIVHIMSTPTQFKIPDWFLNRRKDLKEGKNIHVIANQLDSYLREDLERMKKIRLHRGLRHHWGLRVRGQHTKTTGRRGRTVGVAKKKGA	156	0	null	no	GO_0006412	GO_0006412	GO_0006412,GO_0006412	0	0	0	0	0	0	0	0	0	0	0	0	0	0	0	0	0	0	0	0	0	0	0	0	0	0	0	0	0	0	0	0	0	0	0	0	0
3161	PF3D7_1130100	60S ribosomal protein L38	RPL38	ATGCCAAAACAAATTACTGATATTCGTAAATTTTTAAAAATTAGTAGGAAGCCTGATACCACTGCTGTAATTATAATGAAGAAGAAAAGTAAAACAAAGAAAAATACTGTGATAACAAAATTAAAGTTAAGAACAAAAAAATATTTATACACTATGGTTTTTGCTGATCGTAAAAAAGCTGAAAGAATTGAAAACTCCTTATTACCAAGTTTGAAGAGAATTTATTATCCACAAAAAAAAGTAGGAAAAACTGTTAAGAAATGA	MPKQITDIRKFLKISRKPDTTAVIIMKKKSKTKKNTVITKLKLRTKKYLYTMVFADRKKAERIENSLLPSLKRIYYPQKKVGKTVKK	87	0	null	no	GO_0006412	GO_0006412	GO_0006412,GO_0006412	0	0	0	0	0	0	0	0	0	0	0	0	0	0	0	0	0	0	0	0	0	0	0	0	0	0	0	0	0	0	0	0	0	0	0	0	0
3186	PF3D7_1132700	50S ribosomal protein L2, putative	mRPL2	ATGAATGGATTGCAGTTTTTATTACGAATTAATAAAAATATTATAAGACGATTTTCAAGTTTGTATTCTCCAAATATAAAGAAGAATGTGCCTGATTATATAGATTTCGAAACATTTTACCCTAAAAAAGAAATAAAGCCAGATATTATGACAGCTTTTACTATGGCCAAACAACAACGATTAGAAAAGCTGTTGGAAAATAATCCTTTGGTATTATACAAGGGTAGGGTTATAAAAAAATTATCATGTCCAAGAATAAAAAATTCAGGAAGAAACAATGTAGGAAAAATAACTGTTCGTCATAGAGGTGGAGGTCATGCCCAGAGATTACGATTTATTGATTTTAAAAGATCAAGAAAAGATATATATAGCACTGTATTACGAATAGAATATGACCCA…	MNGLQFLLRINKNIIRRFSSLYSPNIKKNVPDYIDFETFYPKKEIKPDIMTAFTMAKQQRLEKLLENNPLVLYKGRVIKKLSCPRIKNSGRNNVGKITVRHRGGGHAQRLRFIDFKRSRKDIYSTVLRIEYDPSRSAHIALIQYEDGVLSYILAPLLLRPGDKIIASKYANINPGNSLPLQNIPVGSIIHNIEMRPGAGGQLIRAAGTYATIISKDNEYATIKLKSTEIRKFPLQCWATIGQVSNLERHMRILGKAGVNRWLGKRPVVRGVAMNPSKHPHGGGTSKKHTKRPKCSLWGICRDGYKTRSKKKPLGLIIRRNICGRLQKKYGVKS	333	0	null	no	GO_0006412	GO_0006412	GO_0006412,GO_0006412	0	0	0	0	0	0	0	0	0	0	0	0	0	0	0	0	0	0	0	0	0	0	0	0	0	0	0	0	0	0	0	0	0	0	0	0	0
3232	PF3D7_1137100	mitochondrial ribosomal protein S9 precursor, putative	null	ATGATAGGTATAAAATCTTTAAGAAATTTCATTTTAAAAAATATCAAGGAAAATATTAATAAAGGATTTTTTATTCAATACATACATAATTATTCTACACAAAATGAAATAAGTAAAAAATATAAAAATGATTATATTTTATCCTTAGATGAAGCATTATATTTATCTAAAGAGTTGGGAATTAAGACAACTACAGAGATCCAAAGAATTATTATGAGGTCCCCACCATTTTCTCCAGATACAAGTCCGTTCGTTATTGAAAATTTTTTTTCTAGTGAACGACAAGAAAATGATTTAGAAGAATTTTCAGAAATTGATAAAAAAATTATGGAATTAGAAACGACAAAAAAAGAAAAAGAGGAAGATAAAAAAAACCAAGGTGATTTTTGTTCTAATAAT…	MIGIKSLRNFILKNIKENINKGFFIQYIHNYSTQNEISKKYKNDYILSLDEALYLSKELGIKTTTEIQRIIMRSPPFSPDTSPFVIENFFSSERQENDLEEFSEIDKKIMELETTKKEKEEDKKNQGDFCSNNIKISECENNYNDSIINKILIDNFNKKRVKTFWHDNNEWLEESEGIGTNKRSCAYVYIKRGSGIIKINDKEDLYIRWPYFYNRMDVLEPFYITNTACVFDVFIKLKGGGISGQSKAARLAVGRALLNACPHIYNELKQHDILYEDMRQKFPKMPGRKKSRAMKQWSKR	300	0	null	no	GO_0006412	GO_0006412	GO_0006412,GO_0006412	0	0	0	0	0	0	0	0	0	0	0	0	0	0	0	0	0	0	0	0	0	0	0	0	0	0	0	0	0	0	0	0	0	0	0	0	0
3236	PF3D7_1137500	apicoplast ribosomal protein S14p/S29e precursor, putative	null	ATGTTGAGTTTTATAAAATTATTATTATTTTTTTTTAATTTTATGATCTTTCAAGGAAAGGTTATATTATGTGTAAATCATAAAAGTTCAGATTTATCCTTATTTTTATATTCCCATAGAATTTATGAAAACAAAAAGAAAAATCATGTGAGGAAAAAATTGAGTATATTAAATTTAAAGAAGAGATTAGACCCGAATGATAAATACACTGTGATAAAAAGGCATGAATCCAAAATACAAAGAAATTTAAAAAGAAAATATATGATCGAAAGATATAAAGAAAAGAGGCAACAATTAAAAAAATATATATCTGAAGCTTCATCACCTATTGAATATGTTTATTGGAAATATAAACTTTCAACATTACCTAGAGATTCATGTCCAGTACGATATAGAAAT…	MLSFIKLLLFFFNFMIFQGKVILCVNHKSSDLSLFLYSHRIYENKKKNHVRKKLSILNLKKRLDPNDKYTVIKRHESKIQRNLKRKYMIERYKEKRQQLKKYISEASSPIEYVYWKYKLSTLPRDSCPVRYRNRCAITGRARGYYSFFGLCRHQARSLIQKMFFPGFVKASW	172	0	HMM: MLSFIKLLLFFFNFMIFQGKVILCV, NN: MLSFIKLLLFFFNFMIFQGK	yes	GO_0006412	GO_0006412	GO_0006412,GO_0006412	0	0	0	0	0	0	0	0	0	0	0	0	0	0	0	0	0	0	0	0	0	0	0	0	0	0	0	0	0	0	0	0	0	0	0	0	0
3285	PF3D7_1142600	60S ribosomal protein L35ae, putative	null	ATGGAAAATGTAAAAGTAAAAAAAGAACAAACGGAAGTATCTCAGAAAAAAAAAGTTGTCAAGAAGGTTTTAAAGAAAAATAAAAAAACATCTAACAAAAAACTCCAAGCTGTTCGATTATATGAAAAGGGAGTTATATTAGGATACAAAAGATCTCAAAGAAATCAAGATCCCAACTTTACATTAATATCCATTAAAAATGTGAACACGAAAAAGCACGCACAATTCTATGTAGGAAAAAGAGTTGCTTATGTTTATAGAACAACTAAACATCATGATGGAGTTAAAATAAAATGTATATGGGGAAAAGTATGTAGGACTCATGGTAATAGTGGTGTTATAAGAGCAAAATTTAAAACTCATATCCCACCTAAAGCTTTCGGTGATAGAGTTAGAATA…	MENVKVKKEQTEVSQKKKVVKKVLKKNKKTSNKKLQAVRLYEKGVILGYKRSQRNQDPNFTLISIKNVNTKKHAQFYVGKRVAYVYRTTKHHDGVKIKCIWGKVCRTHGNSGVIRAKFKTHIPPKAFGDRVRILMYPSNI	140	0	null	no	GO_0006412	GO_0006412	GO_0006412,GO_0006412	0	0	0	0	0	0	0	0	0	0	0	0	0	0	0	0	0	0	0	0	0	0	0	0	0	0	0	0	0	0	0	0	0	0	0	0	0
3299	PF3D7_1144000	40S ribosomal protein S21	RPS21	ATGTTTAACGATCAAAAAGTTTTAGTCGATATTTATATACCCAGGAAGTGCTCAGCTACATCACGACTTATTCCGGCCAAGGAACATGGAGCTGTACAAATAAATGTTGGAATGGTTGATGCTAATGGAGTTTACAACGGTAAAACCGAAACCTTCGCTATCTCTGGTCATGTCAGACAAAATGGAGAATCAGATGCTTGCTTAAATAGACTTATGTATGAAAAGAAATTATTATCCTTTCAAAACTAA	MFNDQKVLVDIYIPRKCSATSRLIPAKEHGAVQINVGMVDANGVYNGKTETFAISGHVRQNGESDACLNRLMYEKKLLSFQN	82	0	null	no	GO_0006412	GO_0006412	GO_0006412,GO_0006412	0	0	0	0	0	0	0	0	0	0	0	0	0	0	0	0	0	0	0	0	0	0	0	0	0	0	0	0	0	0	0	0	0	0	0	0	0
3737	PF3D7_1239100	mitochondrial ribosomal protein L23 precursor, putative	null	ATGTTTTTGAGCTTTGTTCGATATACTCCTCCTAAAACGCCAAGAAATGTATTTTTTCCATGGCATACATTTTGTATACATAAGTCAGGTAGTTTCTTAGAAAAGAACCGATTGGCTTTAAGAGTTCCTATAAATTTGACAAAATTTGAAATACGAGAATATTTAAGAAAAATATATAATGCAAAAGTAATTAAGGTGAATACATTAATTAAGATACCTGAACGACGACGTAATTTAACAGATCATAGATTTAATTATTATAGGAATGGACCAAGATATAAAAAAGCTATTATTACATTAGAACATGAAGTACCGGATAGTGTTAAAATGATACAGTCATGTAAAAATATAGGTAGAAATCCATATATAACAAAAAAAAATATTACATATGGGGTTAGA…	MFLSFVRYTPPKTPRNVFFPWHTFCIHKSGSFLEKNRLALRVPINLTKFEIREYLRKIYNAKVIKVNTLIKIPERRRNLTDHRFNYYRNGPRYKKAIITLEHEVPDSVKMIQSCKNIGRNPYITKKNITYGVRSDVKIRPTRSQLWHMGECRYSWRLPLTNLLSDYNMNLNPDLRIDDEFVQLTPDPTKPFMHSGISSETIKPNNVPKQTFPHIDLTPWRRQVKKIYDSGTLAPPESFPVTYNGKETIEYSSENKNIKKSSSSKWKPPS	269	0	null	no	GO_0006412	GO_0006412	GO_0006412,GO_0006412	0	0	0	0	0	0	0	0	0	0	0	0	0	0	0	0	0	0	0	0	0	0	0	0	0	0	0	0	0	0	0	0	0	0	0	0	0
3768	PF3D7_1242700	40S ribosomal protein S17, putative	null	ATGGGAAGAGTCAGGACTAAAACTATTAAAAGAGCCGCAAGGCAAATTGTAGAAAAGTACTATGCCAAATTAACTCTAGATTTTCAAATTAACAAAAAGATAACAGAGGAAGTAGCCATAATTCCCTCAAAGAGAATGAAAAATAAAGTTGCTGGTTTTGTTACTCACTTAATGAAAAGAATACAAAAGGGACCTGTACGTGGTATTAGTTTGAAATTACAAGAAGAAGAAAGAGAAAGACGTTTAGATTTTGTCCCAGAAAAATCACAAATTGATGTTAGCGTAATTTATGTAGAACCTGATACATTACGTATGATCAAATCCTTGGGTATAAATATTAGCAACATGAAAGTACATAATCCCATGATTAACACTAACCAACAAAAACAAAACAGAATG…	MGRVRTKTIKRAARQIVEKYYAKLTLDFQINKKITEEVAIIPSKRMKNKVAGFVTHLMKRIQKGPVRGISLKLQEEERERRLDFVPEKSQIDVSVIYVEPDTLRMIKSLGINISNMKVHNPMINTNQQKQNRMNNQF	137	0	null	no	GO_0006412	GO_0006412	GO_0006412,GO_0006412	0	0	0	0	0	0	0	0	0	0	0	0	0	0	0	0	0	0	0	0	0	0	0	0	0	0	0	0	0	0	0	0	0	0	0	0	0
3794	PF3D7_1245400	50S ribosomal protein L3, mitochondrial, putative	null	ATGATTTTTTCGAGGTATCCCCTTATTTGTGGTAATAAAAAAAAAATAGAGGATGGATTTTTTTATTTTATAAAGAATGAGAAAAAGGGTTTTTATGCCTCAAAATGGATACGTAGATTACAATTATTAAATGAAAAATATAATTATAAGATAGATAAAGAAGAAGAAGAAATAGAATATGAAGAGAAGAAAGAGGATGATAATATAAAAAAAGTATATCCTTTATGGAATAGTAGAAGATCAGGATTATTAGGTTATAAAGTTGGATGTATGAGTATATGGGATGTATGGGGTGTTAAGCATGCTGTTACGGTTGTTAAGATAGATAATTGTTATGTAATTAATCAAAAAACTATAAGTAAAAATGGATATGAAGCTTTAGAGCTTGGAGTTGGTAAT…	MIFSRYPLICGNKKKIEDGFFYFIKNEKKGFYASKWIRRLQLLNEKYNYKIDKEEEEIEYEEKKEDDNIKKVYPLWNSRRSGLLGYKVGCMSIWDVWGVKHAVTVVKIDNCYVINQKTISKNGYEALELGVGNMNVIKQSKNNIGNFIKRKLGFIHKIKEFKCTSDCFLPIHHKFSCRHFSPGQNLFISSGIKNKGFCGAMKKWNFSGKNKSHGTESKAHRSLGSVSMGKTINIVFRNKKMNTHIGEKSLVKCSNNKLFRINSLKNLLFIKGTIGGYKNKVIKISDAKGRSFNKFKNKIFLYYPTFIYKKNKKYKNVIDMPHSVEDPFLYNEIPLYDPPNK	341	0	null	no	GO_0006412	GO_0006412	GO_0006412,GO_0006412	0	0	0	0	0	0	0	0	0	0	0	0	0	0	0	0	0	0	0	0	0	0	0	0	0	0	0	0	0	0	0	0	0	0	0	0	0
3910	PF3D7_1302800	40S ribosomal protein S7, putative	null	ATGGATGCTGTTCAAAAGAGAGTATTGAAAAGTAACCCAAGCGATTTAGAAAAAGAAATAGCACAATGTTTGTTAGACATTGAATTATCTAGTTCTTCGGATATAAAAACAGATGCTAAAGAAATAAAATTATTATCATGTGATTTAATAGAAGTAGAAAAATTAAAAAAGAAAACCATTTTAATTTATATTCCTTACAAAATTTATACAACCTATGTAAGAAAAATCCAAAGAAAATTAATTAATGAATTAGAAAAAAAAACGAAAAAATATGTTGTGTTAGTTGCAAAAAGAACAATATTAAAAGGAAAACAAAAAAATAAATCTTTCAAAATTATCCCAAGATCAAGAACTTTAACCAGTGTATATGATTCAATCCTTGAAGATATTGTATCACCA…	MDAVQKRVLKSNPSDLEKEIAQCLLDIELSSSSDIKTDAKEIKLLSCDLIEVEKLKKKTILIYIPYKIYTTYVRKIQRKLINELEKKTKKYVVLVAKRTILKGKQKNKSFKIIPRSRTLTSVYDSILEDIVSPSEIIGKRISMKADGKRVFKIMLDSKERQRDNIEEKLISFAAVYKKITRRDAVFSLPPTNEK	194	0	null	no	GO_0006412	GO_0006412	GO_0006412,GO_0006412	0	0	0	0	0	0	0	0	0	0	0	0	0	0	0	0	0	0	0	0	0	0	0	0	0	0	0	0	0	0	0	0	0	0	0	0	0
3966	PF3D7_1308300	40S ribosomal protein S27	RPS27	ATGAATGTCGATTTATTAAATCCAGATCCAGTTGAAGAATCAAAGAAACATAAATTAAAGAGATTAATTCCAACTCCTAATTCTTATTTTATGGATGTTAAATGCCCAGGATGTCTCCAAATTACAACTTTATTTAGTCACGCACAAAATGTTGTTTTGTGTGGAAGCTGTAACATTATGTTGTGCCAACCAACCGGTGGAAAATGTAAATTGACTGAAGGTTGCTCCTTTAGGAAAAAAATTGAATAA	MNVDLLNPDPVEESKKHKLKRLIPTPNSYFMDVKCPGCLQITTLFSHAQNVVLCGSCNIMLCQPTGGKCKLTEGCSFRKKIE	82	0	null	no	GO_0006412	GO_0006412	GO_0006412,GO_0006412	0	0	0	0	0	0	0	0	0	0	0	0	0	0	0	0	0	0	0	0	0	0	0	0	0	0	0	0	0	0	0	0	0	0	0	0	0
4062	PF3D7_1317800	40S ribosomal protein S19	RPS19	ATGGAGGATGCAAATAAGCCCAAGAAGAGAACCTTTCGTACCTTTCAATATAGAGGTGTTGATTTAGATAAGTTATTAGACTTAAGCCAAGATGAACTTATAAAATTATTTAAAGCAAGACAAAGAAGAAAGTTCCAAAGAGGAATAAGCAAGAAAGCTAAATCACTTTTAAAAAAAATTAGAAAATCTAAAAAAAATTGTGAACCAGGAGAAAAGCCAAATCCTGTCCCTACCCATTTAAGAAATATGACCATCATACCAGAAATGGTAGGATCTATTGTAGCTGTACATAATGGTAAACAATATACGAATGTAGAAATTAAACCAGAAATGATTGGTTATTATCTTGGTGAATTTTCAATTACTTATAAACACACAAGACATGGAAAACCAGGTATT…	MEDANKPKKRTFRTFQYRGVDLDKLLDLSQDELIKLFKARQRRKFQRGISKKAKSLLKKIRKSKKNCEPGEKPNPVPTHLRNMTIIPEMVGSIVAVHNGKQYTNVEIKPEMIGYYLGEFSITYKHTRHGKPGIGATHSSRFIPLK	145	0	null	no	GO_0006412	GO_0006412	GO_0006412,GO_0006412	0	0	0	0	0	0	0	0	0	0	0	0	0	0	0	0	0	0	0	0	0	0	0	0	0	0	0	0	0	0	0	0	0	0	0	0	0
4116	PF3D7_1323100	60S ribosomal protein L6, putative	null	ATGAAAACTATAGTATCAACACAAAAAGTATTAATTCCTGAAGGAGTCAAGGTAGCCATAAATGCAAGAAAGGTAACCGTATCTGGTAAGTACGGAACCTTAAGAAGGAGCTTCAGGCATTTACCAATAGATATTAGATTAAACAAATTAAAGAAATATATTAAGGTAGTTATGTGGTTTGGTGTCCCTGACAGTTTAGCTTGTATTCGTACGGTTTGTACACATTTAAAAAATATGTTTACTGGTGTTACCAAAAAGTTCTTATATAAAATGAGATTAGTACATGCTCACTTTCCCATCAACTCTAATATTGTAGATAATAACACAAGAATCGAAATTAGAAACTACTTAGGAGAAAAAAGTGTTAGATTTGTTAAAGCCTTGCCAGGAGTTGTTATC…	MKTIVSTQKVLIPEGVKVAINARKVTVSGKYGTLRRSFRHLPIDIRLNKLKKYIKVVMWFGVPDSLACIRTVCTHLKNMFTGVTKKFLYKMRLVHAHFPINSNIVDNNTRIEIRNYLGEKSVRFVKALPGVVIEKSPNVKDEIYVSGADIENVSLTAALIHQSVLCRNKDIRKFLDGIYVSEVTTVEKDE	190	0	null	no	GO_0006412	GO_0006412	GO_0006412,GO_0006412	0	0	0	0	0	0	0	0	0	0	0	0	0	0	0	0	0	0	0	0	0	0	0	0	0	0	0	0	0	0	0	0	0	0	0	0	0
4119	PF3D7_1323400	60S ribosomal protein L23	RPL23	ATGACACAAGTAGAAAAAAAAAAAAAAAACGTCAAGAACGTGAATAAACACAAAATCATCCATAAGAGAGTTATAAAAAAGGGGAATAGAAAATATACAAATGGAAATACAAAAGTAAAGTATAGAAAACAGGTAGTAAAAAAAACCATAAATAAAAATGTGTCGAAGAAAAAATTATTGAAAGAAAATGTTGACAAGGATGAAAAGAAGAAAAAAATGAAAATATCCATTCGTTTTAAGAAGCCCAAAACCTTGATATACGCAAGAAATCCAAAGTGTCCAAGAATCGTAAAATCATGTCATAGTAAAACATTAGATAAATATGGATTAATTAAATATCCTTTAACATCAGAAAAGGCTATGAAAAAAATCGAAGAAATAAATACCTTAGTTTTTATG…	MTQVEKKKKNVKNVNKHKIIHKRVIKKGNRKYTNGNTKVKYRKQVVKKTINKNVSKKKLLKENVDKDEKKKKMKISIRFKKPKTLIYARNPKCPRIVKSCHSKTLDKYGLIKYPLTSEKAMKKIEEINTLVFMCDKRANKKNIKKSVKNLFGIECDKVNVLNTLNGDKKAYVRLSGEHDALEVANKIGIL	190	0	null	no	GO_0006412	GO_0006412	GO_0006412,GO_0006412	0	0	0	0	0	0	0	0	0	0	0	0	0	0	0	0	0	0	0	0	0	0	0	0	0	0	0	0	0	0	0	0	0	0	0	0	0
4262	PF3D7_1338200	60S ribosomal protein L6-2, putative	null	ATGACAAACACAAGCAACGAATTAAAGCACTATAATGTGAAAGGAAAGAAAAAAGTTTTAGTACCGGTAAATGCAAAAAAAACCATTAACAAGAAATACTTCGGAAGGAAAGTTGCTTCCAAAAAGAAATATGTTGTACAAAGAAAATTAAGGAAATCTATAGAAGTAGGAAAGGTAGCCATCATATTAACAGGAAAACATATGGGTAAGAGATGTATAATAACCAAAATTTTAAATTCAGGATTATTAGCTGTAGTAGGTCCATATGAAATTAATGGGGTTCCTTTAAAAAGAGTTGATTCAAGATATTTAGTTGTTACATCTACTAATATTTTTAACTTTGAAAATATAGCCAAGTTAAAAGATGACTTCCTTAACTATGCTCAAGATATTGATGAT…	MTNTSNELKHYNVKGKKKVLVPVNAKKTINKKYFGRKVASKKKYVVQRKLRKSIEVGKVAIILTGKHMGKRCIITKILNSGLLAVVGPYEINGVPLKRVDSRYLVVTSTNIFNFENIAKLKDDFLNYAQDIDDDSFIKTLEIKKKQKKLLKNKNEALFMNNVIDKIKEIRKEDPKVQKLEGIQKDIGSLLKPEILKNKVFAHYLKSKFTLRNDMVLHKMKF	221	0	null	no	GO_0006412	GO_0006412	GO_0006412,GO_0006412	0	0	0	0	0	0	0	0	0	0	0	0	0	0	0	0	0	0	0	0	0	0	0	0	0	0	0	0	0	0	0	0	0	0	0	0	0
4288	PF3D7_1341200	60S ribosomal protein L18, putative	null	ATGGTTAAAAAAATAGATAACTCTTTAAATACAAATATACACCAATATCATATTGTTGGAAGAGCTATTCCTACAGCTAAGGATAAGAACCCAAATGTTTATCGCATGTGTATATTTGCTAAGAATGACACTAATGCAAAATCTCGCTTTTGGTACTTTATGAAAAAGATTAATAAACTTAAAAAATCTAATGGAGAATTATTAGCATGTGAACAAATTAAAGAAAGATTTCCCTTACGTGTAAAGAACTATGGTGTTTTATTAAGATATGATAGTAGAACAGGTACTCATAATATGTATAAAGAATTTAGAGATACAACCAAAGAAGGAGCCATAGCTCAATTATATTCTGAAATGGCTGGTAGGCACAGAGCAAGAGCCTCATCTATTAATATTATA…	MVKKIDNSLNTNIHQYHIVGRAIPTAKDKNPNVYRMCIFAKNDTNAKSRFWYFMKKINKLKKSNGELLACEQIKERFPLRVKNYGVLLRYDSRTGTHNMYKEFRDTTKEGAIAQLYSEMAGRHRARASSINIIRISEISSSLVRRPHIKQLLKRRLRFPALHLPTLQKEYRKKFASKRPSTYRM	184	0	null	no	GO_0006412	GO_0006412	GO_0006412,GO_0006412	0	0	0	0	0	0	0	0	0	0	0	0	0	0	0	0	0	0	0	0	0	0	0	0	0	0	0	0	0	0	0	0	0	0	0	0	0
4295	PF3D7_1342000	40S ribosomal protein S6	null	ATGAAGCTGAACATTTCTAACCCCCTTAACAATGTACAAAAAAGCATAGAGATCGACGATGAAAAGAAGTTATTACCTTTTATGGAAAAGAGGATAGGAAATGCTGTACCTGGAGATTCAATAGGCGAAGAATTTACGGGTTATGTATTTAGAATCACTGGAGGTAATGATAAACAAGGTTTTCCTATGATTCAGGGTGTGTTAACTAATAATCGTGTTCGTTTATTATTTAAGAAAGGTATGAAATGTTATAGACCCAGGAAAAAGGGTGAAAGGAAAAGAAAGTCCGTGAGAGGTTGTATTGTTGGTCAAGATTTATCAGCATTAAATTTAACATTAGTTAAAAAAGGTGTAAATGAAATACCAGGTTTAACGGATAAAGCCGTAGGTAAAAAACTA…	MKLNISNPLNNVQKSIEIDDEKKLLPFMEKRIGNAVPGDSIGEEFTGYVFRITGGNDKQGFPMIQGVLTNNRVRLLFKKGMKCYRPRKKGERKRKSVRGCIVGQDLSALNLTLVKKGVNEIPGLTDKAVGKKLGPKRASKIRKLFNLDKSDDVRKYVIGRAITKNGKTKFIKPKIQRLVTEKRLLRKRNLLQAKEKRRLEKKQQLKEYKQLLNKYRSELNQQHDVETTKKKKVKKSLSKTNKTASKSKLNTKQEQKDKTEKKQNKTNNIKNDKSEKKEQAKKKTKTNENTQQTKQNKPDKKNKAKK	306	0	null	no	GO_0006412	GO_0006412	GO_0006412,GO_0006412	0	0	0	0	0	0	0	0	0	0	0	0	0	0	0	0	0	0	0	0	0	0	0	0	0	0	0	0	0	0	0	0	0	0	0	0	0
4460	PF3D7_1358800	40S ribosomal protein S15	RPS15	ATGGGACGTATGTACGGTAAAGGTAAAGGTATATCTAGTTCTACACTTCCATATAAAAGGAAACAACCAAGTTGGTTAAAACAAAAACCATCAGAAATTGAGGATGCTATAATTAAGTTAGCTAAAAAAGGACAAACCCCATCACAAATAGGTGCCACCTTAAGAGATAATTATGGTATTCCACAGGTAAAATCTGTTACCGGAAATAAAATTTTAAGAATCTTAAGAGCTCAAGGTATTGCTACAACTATTCCTGAAGATTTATATTTTTTAATTAAAAAAGCTGTTTCTATGAGAAAACATCTTGAAAAGAACAAGAAAGATAAAGATTGTAAGTTCAGACTTATTTTAACCGAATCCAAAATTCATAGAATATCACGATATTATAAAAGAAAAAAA…	MGRMYGKGKGISSSTLPYKRKQPSWLKQKPSEIEDAIIKLAKKGQTPSQIGATLRDNYGIPQVKSVTGNKILRILRAQGIATTIPEDLYFLIKKAVSMRKHLEKNKKDKDCKFRLILTESKIHRISRYYKRKKLLPSNWKYQSSTASALIA	151	0	null	no	GO_0006412	GO_0006412	GO_0006412,GO_0006412	0	0	0	0	0	0	0	0	0	0	0	0	0	0	0	0	0	0	0	0	0	0	0	0	0	0	0	0	0	0	0	0	0	0	0	0	0
4521	PF3D7_1365100	mitochondrial ribosomal protein S17 precursor, putative	null	ATGATAAGGCTAAACAAAACTTATTCTTATTGGCATTATAAAGCCTGGCAAAGGGCAACAGCTGGATATCTTAGAACGTTTCTTAAAAACAATCTTGCTAATAAGGAAATGATTGGATATGTAATTAATGACAAGCACCCCAAAAGTATAAGAGTAGCTTGTGATAGATATATGTATGTTGTTAGATACAAAAAAACCTTCAGATATACAAAAAAAATATGGGCCCATGACGAAAAAAGTGAAGCCAAAGTTGGGGACGTTGTGCGTATTCAACCGCTAGGATATAGAATTGGACCTTGGAAAAATTATATCCTTGTAAAAATTTTATACAAGGAAAATAAAGATTAA	MIRLNKTYSYWHYKAWQRATAGYLRTFLKNNLANKEMIGYVINDKHPKSIRVACDRYMYVVRYKKTFRYTKKIWAHDEKSEAKVGDVVRIQPLGYRIGPWKNYILVKILYKENKD	115	0	null	no	GO_0006412	GO_0006412	GO_0006412,GO_0006412	0	0	0	0	0	0	0	0	0	0	0	0	0	0	0	0	0	0	0	0	0	0	0	0	0	0	0	0	0	0	0	0	0	0	0	0	0
4627	PF3D7_1404400	mitochondrial ribosomal protein L16 precursor, putative	null	ATGCCCCCAATAATTTATAAAAGTCCTCTACCTGTTCGATTAAAAGCCCCGAAGGGTAGAATAACACCTTTGAATGGACCCGATATAAAAATTGGGAAATCATTAATAGCTGCCTGTCCAAAAAGAATAAGAGGAGAAAAATTAGCTGAAATGAAACAAACAATACGTAAGTATTTAGGAAAGAAAAAAGAATATTTGATTGATGTTCATGCAACTTATAGTGTAACAAAAAAACCTGATGGAACAAAAATGGGACAAGGTAAAGGAATCATTGATCATTTTGTAGCTAGAGTACCTTCAGGAAAAACTATTTTTTCTATACCTACCATAAGCCCATTCAATACATTAGGGTTTGATGACCCTGTATATAGAGTATTAAAAAAAGCAGCAGCAAAAGTA…	MPPIIYKSPLPVRLKAPKGRITPLNGPDIKIGKSLIAACPKRIRGEKLAEMKQTIRKYLGKKKEYLIDVHATYSVTKKPDGTKMGQGKGIIDHFVARVPSGKTIFSIPTISPFNTLGFDDPVYRVLKKAAAKVAIPCVFRTQNNLFRVHNIKYISQQKVKNDQLKHFNQFKSKLFQKKDEV	181	0	null	no	GO_0006412	GO_0006412	GO_0006412,GO_0006412	0	0	0	0	0	0	0	0	0	0	0	0	0	0	0	0	0	0	0	0	0	0	0	0	0	0	0	0	0	0	0	0	0	0	0	0	0
4671	PF3D7_1408600	40S ribosomal protein S8e, putative	null	ATGGGTATTAGCCGTGACGGAAGACACAAGCTTCGCTTGACAGGTGGAAAAAAAAAGATCCACAAGAAAAAAAGAAAATATGAATTAGGTAGGCCTCCTTCAAATACCAAATTAGGTAGCAGACAAGTACACGTAGTTAGAGGAAGAGGAAGAAATTACAAATATCGTGCCATTAAATTAGATTCAGGTAGTTTTTCATGGCCTACCTTTGGTATTTCAAAGAATACAAGAATTATTGATGTTGTTTATAATGCATCAAACAACGAACTTGTAAGAACAAAAACACTCGTCAAAAATTGTATAGTCGTAATAGATTCCCACCCATTCACCACATGGTATGAAAACACATTCGGAACAACCCTTGGAAAAAAGAAGAAAGAAAAGAAGGAAGAAGATAAT…	MGISRDGRHKLRLTGGKKKIHKKKRKYELGRPPSNTKLGSRQVHVVRGRGRNYKYRAIKLDSGSFSWPTFGISKNTRIIDVVYNASNNELVRTKTLVKNCIVVIDSHPFTTWYENTFGTTLGKKKKEKKEEDNKEENKQEVENNEEAAKDETTKTYGVIKKIGKSKNIDPLLLEQFKQGRVLACISSRPGQCGKADGYIIEGDELLFYKRKMDKKKRN	218	0	null	no	GO_0006412	GO_0006412	GO_0006412,GO_0006412	0	0	0	0	0	0	0	0	0	0	0	0	0	0	0	0	0	0	0	0	0	0	0	0	0	0	0	0	0	0	0	0	0	0	0	0	0
4723	PF3D7_1413400	30S ribosomal protein S9, putative	null	ATGTTTTTTAATCATGTAAAGAGTTATATAATTTTGTTCATTTTATTTTGTTCATATTACATAAATGGGAGGGGTGTTAATAGGATTTATAAAAATTGTGGAAGAAAAAAATTGGGAAATATTTTTTGTTGTGCAAATATTATATGTGTTAAGGAAAGAGTAAAAAAGATAAAGCATATTGATAGGTGGGAATATAAAAGAAAGAAAAGAAAAAATATAAATATTTTTTTATATATACCAATAAAGAAAGATATAAATAAGATGAAATATTATAATTTTCGAAATATTGTTATAAATGATTTTTTTTTTTTTATAAATAAATATGTATGTGCATCTAAGATTATAAATATTCATTCAAAATGTAGAAAGAAATTTGTTTTGTTTAAAAAAGATAAGGGA…	MFFNHVKSYIILFILFCSYYINGRGVNRIYKNCGRKKLGNIFCCANIICVKERVKKIKHIDRWEYKRKKRKNINIFLYIPIKKDINKMKYYNFRNIVINDFFFFINKYVCASKIINIHSKCRKKFVLFKKDKGSDKSNNALKKKDKKTFSEEEIEELRKKAKEKSQANRSISEESKRKKSIEKGMKRKRYIKNQKQVKKKKSTSDEEEKKKKELKDKDDTKENVDDGDDIYLRKSKESKDKIQKDEDLNSYIGTIDDFEKISNVTKNIINEKEVEYLQKIIDCDDALLKYDKREKNVKLNIEDTIFDEGNYMEHYINNISKFRYDIYNLHNKNEFDRLTKYLNYQYVEEIPITFPTDKNYHIKLKKYFYESVCDLINKYKHRFQNYTLQQENMSDSHDK…	643	2	HMM: MFFNHVKSYIILFILFCSYYINGR, NN: MFFNHVKSYIILFILFCSYYINGR	yes	GO_0006412	GO_0006412	GO_0006412,GO_0006412	0	0	0	0	0	0	0	0	0	0	0	0	0	0	0	0	0	0	0	0	0	0	0	0	0	0	0	0	0	0	0	0	0	0	0	0	0
4732	PF3D7_1414300	60S ribosomal protein L10, putative	null	ATGGGAAGAAGACCAGCAAGGTGTTATAGGTACTGTAAAAATAAACCCTACCCAAAGAGTCGTTACTGTAGAGGTGTTCCTGACCCTAAGATAAGAATTTATGATATGGGTAGAAAGAAAGCTGATGTCAATGAATTTAGCGGTGTAGTACATTTAGTATCTTACGAATATGAACAGATATCATCTGAAGCTTTAGAAGCTGCACGTATTAGTGCAAACAAATATATGATTACCAATTGTGGTAAAGATAATTTCCACTTAAGAGTAAGAATACATCCTTTCCACGTTTTAAGAATTAATAAGATGTTGTCATGTGCAGGAGCTGATAGACTTCAAACTGGTATGAGAGGAGCCTTCGGTAAACCTAATGGTGTTGTGGCTAGAGTAGATATTGGTCAA…	MGRRPARCYRYCKNKPYPKSRYCRGVPDPKIRIYDMGRKKADVNEFSGVVHLVSYEYEQISSEALEAARISANKYMITNCGKDNFHLRVRIHPFHVLRINKMLSCAGADRLQTGMRGAFGKPNGVVARVDIGQVLLSIRTKENFVSKACEALRRAKYKFPGRQKVFVSNKWGFTPFSKDEYQQYKKKGRIISDGVSCKFIREKGPLDKIYKDINTVLES	219	0	null	no	GO_0006412	GO_0006412	GO_0006412,GO_0006412	0	0	0	0	0	0	0	0	0	0	0	0	0	0	0	0	0	0	0	0	0	0	0	0	0	0	0	0	0	0	0	0	0	0	0	0	0
4822	PF3D7_1424100	60S ribosomal protein L5, putative	RPL5	ATGGCATATGTAAAGGTTGTTAAAAATAAAGCATACTTTAAAAGATACCAAGTGAAATATAGAAGAAGAAGAGAGGGAAAAACCGACTACAGGGCTAGGAAAGCTTTAATATTACAAGACAAGAATAAGTATAATGCTCAAAAGCTTCGTTTTGTTGTTCGTAAAACAAATAGTCAGGTAATATGCCAAATAGCTTGTGCACATATTGAAGGAGATAAAATATTAGCAGAAGCAAAGTCAAAAGAATTGATAAGATACGGTATCCCTGTTGGATTAAAGAATTATGCAGCTGCTTATGCCACCGGTTTATTGTGTGCACGTCGTTTTTTAAAATCTTTAAATTTAGATACTCAATTCTTAGGTGTTGAGAAAGTAACAGGAGAAATAGAAAATAATGAA…	MAYVKVVKNKAYFKRYQVKYRRRREGKTDYRARKALILQDKNKYNAQKLRFVVRKTNSQVICQIACAHIEGDKILAEAKSKELIRYGIPVGLKNYAAAYATGLLCARRFLKSLNLDTQFLGVEKVTGEIENNEDKEDEEGRKPIKAFLDVGITRTTTGNRVFAALKGACDGGLNIPHGNNRFPGSKNEFNPEQLRKNILGIHVAEYMKTLQEEDNDKYKTHFNDYLKNNIGADDIEQMYLNAHEKIRQNPEKESKDTKNVKKFVSKHEKPKKLNAKLRKKRVKEKLALYVEKLQ	294	0	null	no	GO_0006412	GO_0006412	GO_0006412,GO_0006412	0	0	0	0	0	0	0	0	0	0	0	0	0	0	0	0	0	0	0	0	0	0	0	0	0	0	0	0	0	0	0	0	0	0	0	0	0
4832	PF3D7_1426000	60S ribosomal protein L21	RPL21	ATGGGAGGAAAATCAAGAGGAAAAAGGTCAGGTACAAGATATAAGTTTTCTAAAAAATTTAGAAAACATGGAGAATGTACTGCAAATAAGTATTTAGAAAAATTAAATTACGGTGATTATGTTGATATAGTTTGTGATTCTACCCAACAAAAAGGTATGCCGTTTAATTATTATCATGGGAAAACAGGAAAAATATTTCACATAACCAAAAGAGGTGTTGGTGTATTAGTAAATAAAAGAGTTAAACATCGTATTGAACAAAAAAAAGTTTGTGTAAGAATAGAACATGTTAGAAAATCAAGATGTAATGAAGATTTCTTATTAAGAAAAATTAAAAATGCTGAATTAATTAAAGAAGCCAAATTAAAAAATGAACATATCAATATTAAAAGAAAAACT…	MGGKSRGKRSGTRYKFSKKFRKHGECTANKYLEKLNYGDYVDIVCDSTQQKGMPFNYYHGKTGKIFHITKRGVGVLVNKRVKHRIEQKKVCVRIEHVRKSRCNEDFLLRKIKNAELIKEAKLKNEHINIKRKTEGPKPAAMIKVPPSKIITIEPLPFYEEY	161	0	null	no	GO_0006412	GO_0006412	GO_0006412,GO_0006412	0	0	0	0	0	0	0	0	0	0	0	0	0	0	0	0	0	0	0	0	0	0	0	0	0	0	0	0	0	0	0	0	0	0	0	0	0
4884	PF3D7_1431000	mitochondrial ribosomal protein L17-2 precursor, putative	null	ATGGGATATACTTCTACCCTTAAATTCGTGAACTTAGGGGTGAGGAGGAGATTATTTAGAAGAGCTCATAAACAGCCACATCATAAATGGGATAGTATAAAAAACCAGTTGAATGAATTATTAAAATATGGAAGGATAGAAACAACTTTAACAAAGGCAAAAGAGTTACAAGGATATGCTGAGGAGTTAATTTATTTGGCTAAAAAAGATAATGTAGAAAATAATTTAAAAGTAGAAAGTATGTTAAGAACAGCACAAGGGAGAAGAAGATTATACGAATTTTATGTGCCATTATATAGACATAGACCTTTTTTTTTTACTAGGATTATTAATCAATGGAAATTACGTTTAAGAGATTCAGCACCTTTGGCTTATATCGAATTTATAGATAGACCAGGA…	MGYTSTLKFVNLGVRRRLFRRAHKQPHHKWDSIKNQLNELLKYGRIETTLTKAKELQGYAEELIYLAKKDNVENNLKVESMLRTAQGRRRLYEFYVPLYRHRPFFFTRIINQWKLRLRDSAPLAYIEFIDRPGELRPAKPVGYNKIKFIYEEMKKNRRNFRKYFNIAKRFHLLDENDHLLPDFADTGHVPEKSWYDEENEEDDDEIIINPELIQKYKKFNNPMLKGPKKGREPFYVDLPLPSVTERTFLNYRKKFKP	257	0	null	no	GO_0006412	GO_0006412	GO_0006412,GO_0006412	0	0	0	0	0	0	0	0	0	0	0	0	0	0	0	0	0	0	0	0	0	0	0	0	0	0	0	0	0	0	0	0	0	0	0	0	0
4891	PF3D7_1431700	60S ribosomal protein L14, putative	null	ATGCCACGAGTTGAATTAACAGAAGAAGAAAAATTATATATTTCTAAAAAAAATCTTTTGTTTAAAAGATTTGTAGAGCCAGGCAGATTATGCCTTATTGAGTATGGTCCATACGCTGGAAAGTTATGTTTTATTGTAGATATTGTAACCATCACTCGTGTTATCGTCGATGGAGCATTTATTACAGGAGTGCCTCGTATGGTCATCCCCTTGAAAAGATTAAAGTTATTAAAGGAAAGAATTAAAATTAACAAAAATTGTAAAAGTGGATTTTTAAGGAAAACAGTTAACAGCACCAAGGTATTAGAAGAGTTTAATAATTCAAAGTTGGGAAAGAAAATGATCATCAAAAAAAAAAGAGATGAAGCTACCGACTTCGAAAGATTCCAAGTATATTTT…	MPRVELTEEEKLYISKKNLLFKRFVEPGRLCLIEYGPYAGKLCFIVDIVTITRVIVDGAFITGVPRMVIPLKRLKLLKERIKINKNCKSGFLRKTVNSTKVLEEFNNSKLGKKMIIKKKRDEATDFERFQVYFAKRELKKKMTTIKNKKNGENKKVKKNVQKVKA	165	0	null	no	GO_0006412	GO_0006412	GO_0006412,GO_0006412	0	0	0	0	0	0	0	0	0	0	0	0	0	0	0	0	0	0	0	0	0	0	0	0	0	0	0	0	0	0	0	0	0	0	0	0	0
4985	PF3D7_1441200	60S ribosomal protein L1, putative	null	ATGAGCAAGTTGAATCAAGATTTACTTAAAAAAGCCATTTCCGACGTATTTGAAGGAACCAAACAAAAAAAGAGAAAATTTGTAGAAACAATTGAACTCCAAATAGGTTTAAAGGATTATGATACTCAAAGAGATAAACGTTTCTCAGGTACCGTAAGGTTATCTAATGAAGTTCGTAAGAAGTTAAAAGTATGTATTTTAGGAGATGCTGTACATGTAGAAGAAGCTCAAAAATTAGAATTAGATTATATGGACATTGAAGCTATGAAAAAATTAAATAAAGATAAAACTCTTGTTAAGAAACTAGCCAAAAAGTATGATGCATTTTTAGCAAGTCAGGTTATATTACCTCAAATTCCTAAATTACTTGGTCCAGGTTTAAATAAGGCAGGTAAATTT…	MSKLNQDLLKKAISDVFEGTKQKKRKFVETIELQIGLKDYDTQRDKRFSGTVRLSNEVRKKLKVCILGDAVHVEEAQKLELDYMDIEAMKKLNKDKTLVKKLAKKYDAFLASQVILPQIPKLLGPGLNKAGKFPSLITHNDKINDKILELKSSIKFQLKKVLCMGVPVGHANLKEEELRSNIVHAINFLVSLLKKNWQNIRTLHIKSTMGKPQRIYG	217	0	null	no	GO_0006412	GO_0006412	GO_0006412,GO_0006412	0	0	0	0	0	0	0	0	0	0	0	0	0	0	0	0	0	0	0	0	0	0	0	0	0	0	0	0	0	0	0	0	0	0	0	0	0
5042	PF3D7_1447000	40S ribosomal protein S5	null	ATGGAAGATAGAGGAGGTTTTTCAAGAGGTTTTGGAAGAGGTGTTAGAGGAACTCGTGGAAGAGGCGGCAGAGGAGCACGAGGAAGAGGAAGAGGCTCTGCAGAAGATGATTTAAAAAATTGGGTTCCTGTAACCAAGTTAGGTAGATTAGTAAAAGAAGGAAAGATAGTTTCTATTGAAGAAATATATTTACATTCATTACCAATAAAGGAATATCAAATAATAGATTATTTCTTTCAACCTAATGAATGTTCTCATCCTTTAAAAGATGATGTTGTAAAAATAATGCCAGTACAAAAACAAACAAGAGCTGGTCAGAGAACCAGATTTAAAGCATTTGTTGCTATTGGTGATGGTAATGGTCATTGTGGTTTAGGTGTAAAATGTGCAAAGGAAGTA…	MEDRGGFSRGFGRGVRGTRGRGGRGARGRGRGSAEDDLKNWVPVTKLGRLVKEGKIVSIEEIYLHSLPIKEYQIIDYFFQPNECSHPLKDDVVKIMPVQKQTRAGQRTRFKAFVAIGDGNGHCGLGVKCAKEVATAIRGAIISAKLSLIPVRRGYWGNKIGDPHTVPMKVSGKCGSVRIRLVPAPRGTQIVGAPTTKKMLNFAGIKDCFSSSCGKTKTKGNFLRAIFNALSKTYGYLTPDLWKVTNFDKSPYEEWSDFLETYQNLKGIKGTV	272	0	null	no	GO_0006412	GO_0006412	GO_0006412,GO_0006412	0	0	0	0	0	0	0	0	0	0	0	0	0	0	0	0	0	0	0	0	0	0	0	0	0	0	0	0	0	0	0	0	0	0	0	0	0
5118	PF3D7_1454600	mitochondrial ribosomal protein S11 precursor, putative	null	ATGAATGTTTTATCTAAAAACAAGAGCCTTGTTAATTATAAAACCATATTCTCAAGTCCCATTTACATGAATATATGCATAAACCATTTTGTAAATAAATTAATAAATGTATATTCAGCAAAAAGTCTAAAATTTACGACCCTTTCTTCAGATGCAGTAAAGGCAATAACGAATTTAAAAGAATCTGTAAAGAAGCCAGATAAAAAAAAGAAAAACATTACAAGGGAGACACTTAAAAATTGTCAAGGTCATAAGAGAAGATACAAATTATTTGGTGATAGAGAAGAATTTCATAATATAGATAGAGATAAAAATAATTTAATAATTGAACCTACAGATAGTTTTCGAGCTGTTATTACTACATCTAAAAATAATGTACATATTCAAGTTGTAAATAAA…	MNVLSKNKSLVNYKTIFSSPIYMNICINHFVNKLINVYSAKSLKFTTLSSDAVKAITNLKESVKKPDKKKKNITRETLKNCQGHKRRYKLFGDREEFHNIDRDKNNLIIEPTDSFRAVITTSKNNVHIQVVNKSKNYKTIFGSFAGNVGFTKTLQQSERCAYRIGENIAKKCRRLGIFSIDIKFRRIMRVETVLQAMYANNLNITQIIHEPRLPKCGLNASKPRKRRRV	229	0	null	no	GO_0006412	GO_0006412	GO_0006412,GO_0006412	0	0	0	0	0	0	0	0	0	0	0	0	0	0	0	0	0	0	0	0	0	0	0	0	0	0	0	0	0	0	0	0	0	0	0	0	0
5180	PF3D7_1460700	60S ribosomal protein L27	RPL27	ATGGGAAAATTATTGAAACCAGGAAAAGTTATCATAATATTAAACGGTCGTAGAGCTGGAAAAAAGGCTGTCATAGTAAACACTTATGAAGGTCAAACCCGTGAAAGACCATATAGTTACTGCTTAGTAGCTGGTATAGAAAAACATCCATTAAAAGTTAACAAAAGTATGACCAAGAAAAAAATCGTAAAAAGATCAAAAGTTAAGGCCTTTATAAAATGTATTAACGTAAATCACATCCTTCCAACAAGATACCAAGTAGCTAATGATTTCGATATTAAAAGTTTAGCATCTGATGATGTCTTGAAATCCAAAAATAAAAAGAAGGAAGTAAAAAAATTGGGAAAAATATTTAGAGACAAATTTTTGGAACCAGTTAACAAAAAAACCGGAGAGGTT…	MGKLLKPGKVIIILNGRRAGKKAVIVNTYEGQTRERPYSYCLVAGIEKHPLKVNKSMTKKKIVKRSKVKAFIKCINVNHILPTRYQVANDFDIKSLASDDVLKSKNKKKEVKKLGKIFRDKFLEPVNKKTGEVSKDISFLHKKLYF	146	0	null	no	GO_0006412	GO_0006412	GO_0006412,GO_0006412	0	0	0	0	0	0	0	0	0	0	0	0	0	0	0	0	0	0	0	0	0	0	0	0	0	0	0	0	0	0	0	0	0	0	0	0	0
5187	PF3D7_1461300	40S ribosomal protein S28e, putative	null	ATGGAAAAATCAAAATTAGCAAAAGTTGAAAAGGTTTTAGGAAGAACAGGAAGCAGAGGAGGTGTTATTCAGGTAAGGGCACAATTTATGGGAGATTCTGAATTAGCAGGAAGATTCTTAATTAGGAATGTTAAAGGTCCTGTGAGAGAAGGTGATATCTTAGCTTTATTAGAAACTGAAAGAGAAGCAAGAAGATTACGTTAA	MEKSKLAKVEKVLGRTGSRGGVIQVRAQFMGDSELAGRFLIRNVKGPVREGDILALLETEREARRLR	67	0	null	no	GO_0006412	GO_0006412	GO_0006412,GO_0006412	0	0	0	0	0	0	0	0	0	0	0	0	0	0	0	0	0	0	0	0	0	0	0	0	0	0	0	0	0	0	0	0	0	0	0	0	0
5232	PF3D7_1465900	40S ribosomal protein S3	null	ATGTCAGCTCCTATTTCAAAAAAGAGAAAGTTTATTAATGATGGTGTTTTTCAAGCCGAGTTAAATGAATTTTTAGCTCGTATTTTGGCAGAAGATGGATATTCAGGTGTTGAAGTTAGGGTTACACCTATAAGAACGGAGGTTATTATAAGAGCCACTCGTACTAGAGAAGTTCTTGGAGATAAAGGAAGGAGAATACGTGAATTAACATCATTAGTACAAAAAAGATTCTTTAATAAATCAACAAATAGTGTTGAATTATTTGCTGAAAGAGTAGAACATAGAGGATTGTGTGCAATGGCACAAGCCGAATCTTTAAGATATAAATTATTAAAAGGATTAGCAGTAAGAAGAGCATGTTATGGAGTTTTAAGACATATAATGGAATCTGGTGCTAAA…	MSAPISKKRKFINDGVFQAELNEFLARILAEDGYSGVEVRVTPIRTEVIIRATRTREVLGDKGRRIRELTSLVQKRFFNKSTNSVELFAERVEHRGLCAMAQAESLRYKLLKGLAVRRACYGVLRHIMESGAKGCEVIVSGKLRAQRAKSMKFRDGYLISTGEPSKRFVNTATRSAQLKQGVLGIKVKIMLPTAIDTRTGLTSILPDNISVLEPKTDTVDL	221	0	null	no	GO_0006412	GO_0006412	GO_0006412,GO_0006412	0	0	0	0	0	0	0	0	0	0	0	0	0	0	0	0	0	0	0	0	0	0	0	0	0	0	0	0	0	0	0	0	0	0	0	0	0
5313	PF3D7_1474100	mitochondrial ribosomal protein L20 precursor, putative	null	ATGAAATTACCAAGAGAAGTTGTTTTTCAAGTTGCCAAAGGATTTAGAGGAAGGAGTAAAGGATGTTTTAAAATAGCAAGGAGTAGAGCAATGAAAGCTTTGTTATATTCTTATATAATGAGGCGTCAAAAATATAGGAGATTAAGAGTTCATTGGATTGCTAGTATTAACCGGGCATGTAGAGAATGGAAGTTTACATATGCTCATTTTATGAATAGTTTACTTAACAACAATATTTTGTTAAGTAGAAAAAGTTTGTATAATTTATGTTATACGGAACCTATTAGTTTTAAGTGTTTAATTGATGAGTCAAAATTTCTTTATTTCCAGAGAAAATTGAAGTATCGTGATATATCACAGCTGTGA	MKLPREVVFQVAKGFRGRSKGCFKIARSRAMKALLYSYIMRRQKYRRLRVHWIASINRACREWKFTYAHFMNSLLNNNILLSRKSLYNLCYTEPISFKCLIDESKFLYFQRKLKYRDISQL	121	0	null	no	GO_0006412	GO_0006412	GO_0006412,GO_0006412	0	0	0	0	0	0	0	0	0	0	0	0	0	0	0	0	0	0	0	0	0	0	0	0	0	0	0	0	0	0	0	0	0	0	0	0	0
2896	PF3D7_1103100	60S acidic ribosomal protein P1, putative	RPP1	ATGGCATCAATTCCAGCATCAGAATTACCAGAATGTGAAAAGCAGGAACTTTTATGTACCTATGCTGCTTTAATATTACATGAAGAAAAAATGAGTATAACAAGTGACAATATTTTAAAGCTTATTAAAAATTCTAACAATACTGTTTTGCCATACTTACCAATGCTTTTCGAAAGGGCTTTAAAGGGAAAAGATATTCAGAGCTTATTAAGTAACTTAAGTGTAGGAAGTGCCCCTGCAGCTGCTGCCCAAGTTACAACTGAGAAACCAAGTGAAGACAAAAAGGAAGCCAAAAAAGAAGAGAAAGTAGAGGAAGAAGAAGAAGAAGATGATTTAGGTTTCTCCTTATTTGGTTAA	MASIPASELPECEKQELLCTYAALILHEEKMSITSDNILKLIKNSNNTVLPYLPMLFERALKGKDIQSLLSNLSVGSAPAAAAQVTTEKPSEDKKEAKKEEKVEEEEEEDDLGFSLFG	118	0	null	no	GO_0006414	GO_0006412	GO_0006414,GO_0006412	0	0	0	0	0	0	0	0	0	0	0	0	0	0	0	0	0	0	0	0	0	0	0	0	0	0	0	0	0	0	0	0	0	0	0	0	0
3162	PF3D7_1130200	60S ribosomal protein P0	PfP0	ATGGCGAAATTATCCAAGCAACAAAAAAAGCAAATGTACATTGAGAAGCTTAGCTCTCTCATTCAACAATATTCCAAAATATTAATTGTGCATGTAGACAATGTGGGATCTAATCAAATGGCTAGTGTTCGTAAAAGTTTAAGAGGAAAGGCTACAATATTGATGGGAAAAAATACAAGAATTCGAACGGCTCTTAAAAAGAATTTACAAGCTGTACCTCAAATAGAAAAATTGTTACCTTTAGTAAAATTAAATATGGGTTTTGTATTTTGTAAAGATGATTTATCTGAAATAAGAAACATCATTTTAGATAATAAATCTCCAGCACCAGCAAGATTAGGTGTTATAGCACCAATAGACGTTTTTATTCCACCAGGACCAACAGGTATGGATCCATCT…	MAKLSKQQKKQMYIEKLSSLIQQYSKILIVHVDNVGSNQMASVRKSLRGKATILMGKNTRIRTALKKNLQAVPQIEKLLPLVKLNMGFVFCKDDLSEIRNIILDNKSPAPARLGVIAPIDVFIPPGPTGMDPSHTSFFQSLGISTKIVKGQIEIQEHVHLIKQGEKVTASSATLLQKFNMKPFSYGVDVRTVYDDGVIYDAKVLDITDEDILEKFSKGVSNVAALSRATGVITEASYPHVFVEAFKNIVALIIDSDYTFPLMENIKKMVENPEAFAAVAAPASAAKADEPKKEEAKKVEEEEEEEEDGFMGFGMFD	316	0	null	no	GO_0042254, GO_0006414	GO_0006412	GO_0042254,GO_0006414,GO_0006412	0	0	0	0	0	0	0	0	0	0	0	0	0	0	0	0	0	0	0	0	0	0	0	0	0	0	0	0	0	0	0	0	0	0	0	0	0
502	PF3D7_0315100	eukaryotic translation initiation factor 4E	eIF4E	ATGAAGTATTTAACATTTAATAAAAATAACAGAGATGCTATTGATTTGAGTGAAAAACTAGAAGCTACTAAAATAGATTTATCGAATCCCTTATTATTACAATATAATTGGGTGATATGGGAACAAGTATCAGATAATAAAATAAAACAAAGTAATAATTATAAGGATTATACAAGACCACTAGCTAAATTTAATAGTGTTCAAAAATTTTGGCAATTATGGAATAGATTACCTCAACCAAGTGATTTACTGGCACAAAGAAGTATGACCAGATTTTCAGAAGATGGAATATTTCGTATTGTTGATGCTCTTATGATATTTAGAGATAATATACAACCTATGTGGGAAGATCCAGCAAATTCAGGCGGTGGTCATTTTGAATATAAAATATTACCTAAG…	MKYLTFNKNNRDAIDLSEKLEATKIDLSNPLLLQYNWVIWEQVSDNKIKQSNNYKDYTRPLAKFNSVQKFWQLWNRLPQPSDLLAQRSMTRFSEDGIFRIVDALMIFRDNIQPMWEDPANSGGGHFEYKILPKDYPYSQIDEFWNNLVLAIIGCSLKHYDLITGIRLVDKLSTTRYGYIRIEIWYTTITDESVKNYLRKDLEEHMCNRIDGSTIFPPRVKSLSHIHR	227	0	null	no	GO_0006413	GO_0006413	GO_0006413,GO_0006413	0	0	0	0	0	0	0	0	0	0	0	0	0	0	0	0	0	0	0	0	0	0	0	0	0	0	0	0	0	0	0	0	0	0	0	0	0
3293	PF3D7_1143400	translation initiation factor eIF-1A, putative	null	ATGCCAAAGAATAAAGGAAAGGGAGGTAAAAACAGAAGGAGAGGAAAGAATGATAACGAAGGAGAAAAAAGAGAATTATTATACAAGGAAGAAGATCAAGAATATGCTCAAGTTTTAAGAATGTTGGGTAATGGTAGATTAGAGGCCCATTGTTTTGATGGTGTCAAAAGATTGTGTCATATTAGGGGTAAAATGAGAAAAAGGGTATGGATTAATTCAGGTGATATTATTTTAGTGTCCTTAAGAGATTATCAAGACAGTAAAGCTGATGTTATAGCAAAATATACTCCTGATGAGGCAAGAAGCTTGAAGGCTCACGGAGAATTACCAGAAACAGCAAAAATAAACGAAACAGACATTTTTGATGACGATGGACAAAATGGAGTGGAATTTTTGGAT…	MPKNKGKGGKNRRRGKNDNEGEKRELLYKEEDQEYAQVLRMLGNGRLEAHCFDGVKRLCHIRGKMRKRVWINSGDIILVSLRDYQDSKADVIAKYTPDEARSLKAHGELPETAKINETDIFDDDGQNGVEFLDDESDEEAQEEMNNARRLDIEDI	155	0	null	no	GO_0006413	GO_0006413	GO_0006413,GO_0006413	0	0	0	0	0	0	0	0	0	0	0	0	0	0	0	0	0	0	0	0	0	0	0	0	0	0	0	0	0	0	0	0	0	0	0	0	0
3777	PF3D7_1243600	translation initiation factor SUI1, putative	null	ATGAACCTCGCTATACAGAATCTTGGTATTAATGACCCCTTTACAAATGAAAATATTGTCGATAAGGGGAATGGTAAATCCAACGCGACGAATTTAATACATATTAGAAATCAACAAAGAAATGGTAGAAAAAGTGTTACTACAGTACAAGGATTAGGAAAAACATTTGATTTGAAAAAGATGGTTAGAGCCTTAAAAAAGGAATTTAATTGTAATGGAACAATTATTGAAGATATTGAGCATGGTTCAATTATTCAACTTCAAGGCGATAAAAGAAACAACGTTAAAGAGTTTCTAATAAGAGAAGGAATTTGCGCATTAGAGCACATACGTATACACGGTGCTTAA	MNLAIQNLGINDPFTNENIVDKGNGKSNATNLIHIRNQQRNGRKSVTTVQGLGKTFDLKKMVRALKKEFNCNGTIIEDIEHGSIIQLQGDKRNNVKEFLIREGICALEHIRIHGA	115	0	null	no	GO_0006413	GO_0006413	GO_0006413,GO_0006413	0	0	0	0	0	0	0	0	0	0	0	0	0	0	0	0	0	0	0	0	0	0	0	0	0	0	0	0	0	0	0	0	0	0	0	0	0
5263	PF3D7_1469000	translation initiation factor IF-1	IF1	ATGTGTAGTGTTTTCATAACCCGTTTGTCTTTTGATTTTTTTGTTTTCCTTTTTTTTTGTTTTTTTTTTTTGTATTTCCCATCAGAAGAAATAAAAGTTGAGAAGAAAACATTCTCTTTCTTAAATTTTAATAATAATATATCACAATGGAAAAATAATAAAACCTCAAGATTTTTTCATAAAATATCATGGAATAAAAAGCATATTAAAAATAATATAAATCATTTTTTAAGAGATAAAAAAGGAGTACACATATTATATGAAAAAAATGAAAATGTAAAAAATGAAATTCCAAAAACAAAAGAAAATGATACATTCGAAATGAATGGTGTAGTAGTAGAATGCTTAGCTAACACAAATTTTATTGTAAGCATACCAAATGGTGAAAAATTTTTATGT…	MCSVFITRLSFDFFVFLFFCFFFLYFPSEEIKVEKKTFSFLNFNNNISQWKNNKTSRFFHKISWNKKHIKNNINHFLRDKKGVHILYEKNENVKNEIPKTKENDTFEMNGVVVECLANTNFIVSIPNGEKFLCFISGKLRINKVKINLGDMVKFQIHKLNFEKRRGKIVFRYLQHTSLKKKK	182	1	HMM: MCSVFITRLSFDFFVFLFFCFFFLYFPSE, NN: MCSVFITRLSFDFFVFLFFCFFFLYFPSE	yes	GO_0006413	GO_0006413	GO_0006413,GO_0006413	0	0	0	0	0	0	0	0	0	0	0	0	0	0	0	0	0	0	0	0	0	0	0	0	0	0	0	0	0	0	0	0	0	0	0	0	0
3399	PF3D7_1204300	eukaryotic translation initiation factor 5A	EIF5A	ATGTCAGATCATGAAATGTACGATAATATTGATGCTGGAGCATCACAAACGTACCCTGTGCAAGCAGGTGCAATAAAAAAAAATGGTCATGTAATGTTGAAAGAGCATCCATGTAAGGTGGTTGATTATTCCACATCAAAAACAGGAAAGCATGGTCATGCAAAAGCACACATTGTAGGTATAGATATATTTACAGGAAGGAAATATGAAGATATATGTCCAACATCTCATAATATGGATGTACCTGTTGTAAAAAGAACTGAATTACAATTAATTGATATTACAGAAGATGGTTTTGTGTCTCTTTTATATGATAATGGAGATACCAAAGATGATTTAAGTTTACCAAAAGATACCGAAGGAAACTTAGATGAAGTAGCTAAACAAATACGAAATTTA…	MSDHEMYDNIDAGASQTYPVQAGAIKKNGHVMLKEHPCKVVDYSTSKTGKHGHAKAHIVGIDIFTGRKYEDICPTSHNMDVPVVKRTELQLIDITEDGFVSLLYDNGDTKDDLSLPKDTEGNLDEVAKQIRNLFDNGKSVLVSVLSACGQEKIIAAKELSS	161	0	null	no	GO_0008612, GO_0045901, GO_0045905, GO_0006452	GO_0006413	GO_0008612,GO_0045901,GO_0045905,GO_0006452,GO_0006413	0	0	0	0	0	0	0	0	0	0	0	0	0	0	0	0	0	0	0	0	0	0	0	0	0	0	0	0	0	0	0	0	0	0	0	0	0
4016	PF3D7_1313200	methionyl-tRNA formyltransferase, putative	MTFMT	ATGTATGTAAAATGTTTCTTTTATGTGATACAAATATTATTTATAATATTTTTAAAATGTCATTGTTATAAAATAAAATGTTTTAACATATTAGACCTCAATAAAAAGAAATATTATTCTTTTCGTGAACATATTAATTGTGAGCATATAAGAAATAGCGTAAATCGAAATAATTTGTCAAATGTTTTATTAAGAAGAAGAACAAAAAATGCACTTGTTAAAGAATTATATGTTTCAAAGTTAAAAGATAATTACAAAACACATACCAATTTCATAAGGACAAATAATATATTCTTAGAAGAAGATAAAAAAATACAAGAATGTAATATAAATAACATAATAAATAATAATGTGGACATTCAAGAAAATGTTGAAAAATATAATATTTTATATAAAAAT…	MYVKCFFYVIQILFIIFLKCHCYKIKCFNILDLNKKKYYSFREHINCEHIRNSVNRNNLSNVLLRRRTKNALVKELYVSKLKDNYKTHTNFIRTNNIFLEEDKKIQECNINNIINNNVDIQENVEKYNILYKNQLDDINILYILLFNTLMIYKKKYDFFMNENYIRSYYYIYKNNLGRDKKIYNTKNYFINTFSITWYNTIKPYMNNIFLEILNIIENTLGNKIFYIDIKQELNKNRDEIINTLYNIYKGNFRKRDKKPIKLLFIGSNEYSNLCFKIILLIIKRLRNDIILDNVITKSPRRKGRNLILKKSNVEDEAIKNNINVFYYDKLKNNIHMLQNKKMDLCISISFGEIFNCNFFKTIKSNIFSLHPSLLPFYKGASPIQRSLLNNEILYGYSVF…	665	0	HMM: MYVKCFFYVIQILFIIFLKCHCY, NN: MYVKCFFYVIQILFIIFLKCHCY	yes	GO_0009058	GO_0006413	GO_0009058,GO_0006413	0	0	0	0	0	0	0	0	0	0	0	0	0	0	0	0	0	0	0	0	0	0	0	0	0	0	0	0	0	0	0	0	0	0	0	0	0
403	PF3D7_0305000	elongation factor Ts	EF-Ts	ATGAAATTGTTTTATTTTTTCTTGTTAAGCTTTCTGAGCAGTTATATAATTGCGTTTTCTTTTAAAAGTACGCAGAGTGCACATTTTATATTATCTGTGGGGAGATGTAATGAAAATTACGGTAATAATATTAAGAAAAATAGATTATATTCTACAAATAATGATCATTTAAAATTATTAAAATATGTAAGAGAAGTTACTAATGCTAGTATACAATTATGTAATAAAGCTTTGAAAGAATGTAACAATGATGTAGATAAAGCAATTGAACATGTTAGGAAAAATACCAAAAGTTCAACATTTGTTTCAACAAATATTAAAGTAAAAAAAGAAGGATTAGTAGCTAGCCAAATAAAAGATGACAAAATAGTTTTGTTAGAACTTTTAACTGACTCTGAT…	MKLFYFFLLSFLSSYIIAFSFKSTQSAHFILSVGRCNENYGNNIKKNRLYSTNNDHLKLLKYVREVTNASIQLCNKALKECNNDVDKAIEHVRKNTKSSTFVSTNIKVKKEGLVASQIKDDKIVLLELLTDSDFVARNKMFVQFVYSLLNVTLDNDLSVGNCKNAGDNKNSEDGYTTSGNILSNNNIMDEILSLPYVDEENKSNSTMREQLNYLRNIFREDIKIGRFSKYSKKNPNEFLHYYIHNKLDDHVGLSGVLLVLHINNLDEILKTKKEDIVNFANDLSMHIISAKPASVSIDTLNPKITKKEMDIIRDGLKDMKKPENILNNMIQGKMKKFYSSIVFLEQEYMLDETKRKVSQVIKDFGKDHNINISVNHFNYFAIGEKNVLME	390	0	HMM: MKLFYFFLLSFLSSYIIAF, NN: MKLFYFFLLSFLSSYIIAF	yes	GO_0006414	GO_0006414	GO_0006414,GO_0006414	0	0	0	0	0	0	0	0	0	0	0	0	0	0	0	0	0	0	0	0	0	0	0	0	0	0	0	0	0	0	0	0	0	0	0	0	0
548	PF3D7_0319600	elongation factor 1-delta, putative	EF-1delta	ATGGCAAATACGTATGATGAATTATATGTACCTTTAAGTTATTATATTCTACAAAATGAGGGAGGAAATACCAGTAAAATAGATCAAGCTAATACTAAGAAACCCAAAAAGAAGGAAGTTATTAATAAGTCATCCCTAATTATTGATATAAAACCCTATGGTGAAAATACAGATCTTGATGAGGTGTTAAAACTTGTAAAAAATATAACAATGGAAGGATTAACTTGGGGAAAAGCTCATAAGAAAACACCCTTCGCCTTTGGACTTTTCAAATTACAAGTATCTTGTGTTATAGTAGACGATTTAGTTAATACAGATGAACTTATAGAAACGATTGAAAACCTTGGATTGGATAATGAACAGTTACAAAAGAAAAAACAAATGGATGATGATGAAGAA…	MANTYDELYVPLSYYILQNEGGNTSKIDQANTKKPKKKEVINKSSLIIDIKPYGENTDLDEVLKLVKNITMEGLTWGKAHKKTPFAFGLFKLQVSCVIVDDLVNTDELIETIENLGLDNEQLQKKKQMDDDEENYDEDDEIGGLVQSAEIISFNKL	156	0	null	no	GO_0006414	GO_0006414	GO_0006414,GO_0006414	0	0	0	0	0	0	0	0	0	0	0	0	0	0	0	0	0	0	0	0	0	0	0	0	0	0	0	0	0	0	0	0	0	0	0	0	0
4192	PF3D7_1330600	elongation factor Tu, putative	null	ATGCTTAAAAGTAAATGTATCTTTTTGAACTCTTTTACGAAGAGTGATAAATTGAAGCACACATTTGAACGGTTAAACCTAATGATGGAAAAAAGAAATATGAATAATTTGTTATATAACAAAGCAGTTGAATGTCACATATATATAAGAAGAGATAGAGATACGAAGGAAACAAATAAAAAGTTAAACAATATGTATAATAAATATTCATGTAAATGTAATATAACAAATAAATGTAGTAATAAGAATAAAGTATATAATATATATAAAAGACAAAATAATTTGGTTGATAATAAAGATAAGTTCTTTTGTATATTTCGTCAGAATTTTGCTATTGGAATATTTGAGAGAAAAAAGCCTCATATGAATATAGGTACTATAGGTCATGTGGACCATGGG…	MLKSKCIFLNSFTKSDKLKHTFERLNLMMEKRNMNNLLYNKAVECHIYIRRDRDTKETNKKLNNMYNKYSCKCNITNKCSNKNKVYNIYKRQNNLVDNKDKFFCIFRQNFAIGIFERKKPHMNIGTIGHVDHGKTTLTAAITKVCSDLNRGVFKSYEEIDKTPEEQKRGITINATHVEYETEKRHYSHIDCPGHLDYIKNMITGTSQMDGSILVVSAYDGLMPQTKEHVLLSRQIGIEKMIVYLNKIDMCEDQELVDLVELEIRELLSFHKYDGDNIPFIKGSALKALNGDQSEYGVPSILKLLDACDNYIEEPKRKTDLPFLMSIDDVLQISGKGTVATGKVEQGTLKLNDQVEILGIKEKSIKTVITGIEMFRKILDTAQAGDQIGIMLKNVKRNDI…	505	0	null	no	GO_0006414	GO_0006414	GO_0006414,GO_0006414	0	0	0	0	0	0	0	0	0	0	0	0	0	0	0	0	0	0	0	0	0	0	0	0	0	0	0	0	0	0	0	0	0	0	0	0	0
4263	PF3D7_1338300	elongation factor 1-gamma, putative	EF-1gamma	ATGGATTTTAAATTACTTGCTCCCAAAAATGACGTCAGAACTTTGAAGGTTCAAACAGTAGCATCATTTTGCAATGTGAAATTAAATATGCCGAACTTTGAACTTGGTAAAGATAACAAGACAGCCGATTTTTTAAAACACTCTCCGCTAGGTAGGTTGCCTGTTTTGGTTACGTCTCATGGTTCTATTTTTGAAAGTAATGCTGTTTGTAAATACCTTTGTAGTATTCATAGAGAAGGGGATTATTTAGGTAAGGGTTCTTTTGAAGAAGCACAAGTAAATATGTGGGTAGATTTCAACACATACGAATTAGAAATTCCTATGACTTGTTATATGAATAATAAATCCTGTGAGAAATCTTTAAAACATATAGAAGATACTTTAAAATGTTATAATAAT…	MDFKLLAPKNDVRTLKVQTVASFCNVKLNMPNFELGKDNKTADFLKHSPLGRLPVLVTSHGSIFESNAVCKYLCSIHREGDYLGKGSFEEAQVNMWVDFNTYELEIPMTCYMNNKSCEKSLKHIEDTLKCYNNHLLYNQYMVGNSITIADIFISVILYFSLNSGALNESIVLKYKNLYRLYDTISNQKQFKYVFACDQNKKKNTQDKSTGAKKKQGNNKKDDNNNNNNNDADNQHADLLSDDLAEKKQPKKTNPLDLLPPSNFSLDEWKYKFSNEKDLLNNAMPHFWKTYDPNGFSLYYMKYDKLEDECQISFVACNMAGGFLQRLENNFSKYSFAVVTVLGENKSYDIEGVWLFRGTDIPFEMKDHPSFEYHIFKKLDINNTQDKKIVEEYWCSKETV…	411	0	null	no	GO_0006414	GO_0006414	GO_0006414,GO_0006414	0	0	0	0	0	0	0	0	0	0	0	0	0	0	0	0	0	0	0	0	0	0	0	0	0	0	0	0	0	0	0	0	0	0	0	0	0
4443	PF3D7_1357100	elongation factor 1-alpha	null	ATGGGAAAGGAAAAAACACATATTAACTTAGTTGTTATTGGTCACGTCGATAGTGGAAAATCAACCACTACAGGTCACATTATTTACAAATTAGGAGGTATAGATAGAAGAACTATTGAAAAATTTGAGAAAGAATCTGCTGAAATGGGTAAGGGTAGTTTTAAATATGCATGGGTTTTAGATAAACTTAAGGCAGAAAGAGAAAGAGGTATTACCATTGATATTGCCTTATGGAAATTTGAAACCCCAAGGTATTTCTTTACTGTCATTGATGCACCAGGTCACAAGGATTTTATTAAAAATATGATTACAGGTACATCACAAGCAGATGTTGCTTTATTAGTTGTCCCAGCTGAAGTAGGTGGTTTCGAAGGTGCCTTTTCAAAGGAAGGTCAAACA…	MGKEKTHINLVVIGHVDSGKSTTTGHIIYKLGGIDRRTIEKFEKESAEMGKGSFKYAWVLDKLKAERERGITIDIALWKFETPRYFFTVIDAPGHKDFIKNMITGTSQADVALLVVPAEVGGFEGAFSKEGQTKEHALLAFTLGVKQIVVGVNKMDTVKYSEDRYEEIKKEVKDYLKKVGYQADKVDFIPISGFEGDNLIEKSDKTPWYKGRTLIEALDTMEPPKRPYDKPLRIPLQGVYKIGGIGTVPVGRVETGILKAGMVLNFAPSAVVSECKSVEMHKEVLEEARPGDNIGFNVKNVSVKEIKRGYVASDTKNEPAKGCSKFTAQVIILNHPGEIKNGYTPVLDCHTSHISCKFLNIDSKIDKRSGKVVEENPKAIKSGDSALVSLEPKKPMVVE…	443	0	null	no	GO_0006414	GO_0006414	GO_0006414,GO_0006414	0	0	0	0	0	0	0	0	0	0	0	0	0	0	0	0	0	0	0	0	0	0	0	0	0	0	0	0	0	0	0	0	0	0	0	0	0
4547	PF3D7_1367700	alanine--tRNA ligase	AlaRS	ATGATTGTTTATTCCTTTTCCTTTTTGATATTCCTTTATTTTTGTTTATATTTGAATATTAAAGAAAGCATTATATTAGGTAATTGTAAGATTATATTAAGTAGGCCCTTTAAAGAAGAGAAGAAGAAGAAAGATATATATTTTTTTTTTAATTCTGGAAAGAATTTATTAAAAAGAAAGAAAAGTACCTTTGATTTGTTGCCTCTGCATTCAAATAAAAGGAGAAGAATAAATTTATTTATTAATAATGATAAAAAAAAAAAAATAAAAAGCAATAGTAATAATAATAATAGTAATAATAATAGTAATAATAACAATAGTAATAATAACAATAGTAATAATAACAATAATAATAGTAGTAGTATAAAAAGAGAATGTGGTGAACCATTTTTTTCTTTT…	MIVYSFSFLIFLYFCLYLNIKESIILGNCKIILSRPFKEEKKKKDIYFFFNSGKNLLKRKKSTFDLLPLHSNKRRRINLFINNDKKKKIKSNSNNNNSNNNSNNNNSNNNNSNNNNNNSSSIKRECGEPFFSFYSYENILTVHNNKILKDQNNNYVLLHLCKKIKKKYKKEKNKKREYCNHYKFMYLNSIKRKDIFIKLNKINNKSHFYKDIHKSNKCIKTFIYSSSHNFHNSNYSSLNAFSFKSLFTKNTYNRSFLNFLKYTTKNNLKEKKNIKDFFSFSIKLGKDKNINLDNLKKGYYKDINTNNRSNHNKHNNNKYNYNNNNCSSNHFCSNHFCSNHFCSNHFCINMDMNDKLNNRNNWSNTNNPKDDNIKNTNCSTNDEGQKKYMSAEEVRNNFI…	1408	0	HMM: MIVYSFSFLIFLYFCLYLNIKESI, NN: MIVYSFSFLIFLYFCLYLNIKESI	yes	GO_0006419, GO_0043039	GO_0006419	GO_0006419,GO_0043039,GO_0006419	0	0	0	0	0	0	0	0	0	0	0	0	0	0	0	0	0	0	0	0	0	0	0	0	0	0	0	0	0	0	0	0	0	0	0	0	0
3540	PF3D7_1218600	arginine--tRNA ligase	RRS	ATGATAACAATGGAATGTATAACAAAGAAGATAAAAACCATATTTCAAAATTCTATTCAAAAATGTTTCCCTTCTATTAGTGAAGATGCTATTGTTACTTATGCCAATCTTAAATTTGGACATTATCAATGCAATAACGCTATAAATATTTATAAAAAATATGGAAAGGAATTAAACTATGAAAATGCCCAGAAAATATCAGAATTTATAATTTCCAATATAAACGAAACAATATTTGAGGAAATAAAATCGTCACCCCAAGGTTTTATAACAGTGAAGTTATCAAAGGACTATATTGAGACATCATTAAAAAAATTGTTTAATGGGGAAAAAATAGATATAAGTATAAATATAAATGATATAAAGGAATCTAATGAGAATTATGGTAATGTACTGGTT…	MITMECITKKIKTIFQNSIQKCFPSISEDAIVTYANLKFGHYQCNNAINIYKKYGKELNYENAQKISEFIISNINETIFEEIKSSPQGFITVKLSKDYIETSLKKLFNGEKIDISININDIKESNENYGNVLVDFSSPNIAKEMHVGHLRSTIIGDSICRVFEFLKINTHRVNHVGDWGTQFGMIINYIKTHYPNFKEEMPDLSNLTSLYQESKKMYDADKEFEKSSKENAIKLQNNDEDCKFVWNKLCESSKKEFDKLYNILDIKLEYVGESFYVPMLSTVLDLLKESKLLTNIGDAICYQSENFKVPLFLQKSNGGYGYDSTDVAALYYRLTQLNCNCVIYVTDIGQLTHFETIFDLIKKTNWGDKNAKLMHVGFGFVLNEDNKKFKTRSGTTVKLI…	590	0	null	no	GO_0006420, GO_0006418	GO_0006420	GO_0006420,GO_0006418,GO_0006420	0	0	0	0	0	0	0	0	0	0	0	0	0	0	0	0	0	0	0	0	0	0	0	0	0	0	0	0	0	0	0	0	0	0	0	0	0
251	PF3D7_0211800	asparagine--tRNA ligase	AsnRS	ATGTGTGAGAAAGACGATATTACTGTGAATGAGGAAATTTTACAAAAGGCACAAGAGTTTCAGGTGGAAAATGAGAAGGATATAAAGATGAAGAAATTAAAACCAATAACTGAAGGGTTGTTAAAACCAGAGGTCGATTTATTACAAATAAGTGAGAGAGGTAGTCGAGGAAGAGTAAAGATATGTAATGTATTAAATGTTCCAAGAAGCGAAAAGGAATATAATAATAATAATAGTGATAAAGTAGAAAATAAATATATTGGTAAAATAATTACAGTATGTGGTTGGAGTAAAGCTATACGTAAACAAGGAGGTGGAAGATTTTGTTTTGTGAATTTAAATGATGGATCATGTCATTTAAATTTACAGATTGTTGTAAATCAGTGTATAGAAAATTAT…	MCEKDDITVNEEILQKAQEFQVENEKDIKMKKLKPITEGLLKPEVDLLQISERGSRGRVKICNVLNVPRSEKEYNNNNSDKVENKYIGKIITVCGWSKAIRKQGGGRFCFVNLNDGSCHLNLQIVVNQCIENYEKLLKCGAGCCFRFTGELIISPVQNDNNKKGLLKENVELALNNNDIHNFEIYGENLDPQKYPLSKKNHGKEFLREVAHLRPRSYFISSVIRIRNSLSIATHLFFQSRGFLYIHTPLITTSDCEGGGEMFTVTTLLNENGDIRSIPRINLKNKKKEKREDILNEKNGKKDHMNDSLNNNTCNNNNNNGNSSSSNIVSSPQYEDNYLIDYKKDFFSKQAFLTVSGQLSLENLCSSMGDVYTFGPTFRAENSHTSRHLAEFWMIEPEIA…	610	0	null	no	GO_0006421, GO_0006418	GO_0006421	GO_0006421,GO_0006418,GO_0006421	0	0	0	0	0	0	0	0	0	0	0	0	0	0	0	0	0	0	0	0	0	0	0	0	0	0	0	0	0	0	0	0	0	0	0	0	0
925	PF3D7_0509600	asparagine--tRNA ligase	AsnRS	ATGAGAATATATTTTATCACATTAATCTATTTCTTTACATTATTATTTTTATTAACAAAATGTATTAAAAACAAGAACAGAAATAAGATATCAAATATAAGCTGTACCTATAATTTGTCAAGGATAAGAAATAGGCCTGTACTTACAACAGGTACTAAAAGGAGAAAGCTGAGGAATAATTTTTTTTTTTTAAACAACTACAGAAAAATGATATCATTATGTAATAAAATAGATATAAAGAAAAGGTTCTTACTTCCTAAGCTTCAGGGGAAATATAATCTGTACTGTACAACAAAAAATGTTGAAAGGACGAGAATTAAAGACCTATTTAAAATGGACATAAAAGAAGCACAACATAAAAATTTTAAAATTTGTGGTTGGATAAAATCAGTGAGAACA…	MRIYFITLIYFFTLLFLLTKCIKNKNRNKISNISCTYNLSRIRNRPVLTTGTKRRKLRNNFFFLNNYRKMISLCNKIDIKKRFLLPKLQGKYNLYCTTKNVERTRIKDLFKMDIKEAQHKNFKICGWIKSVRTVGKSYFVFVDINDGSYYKNLQVIIDDKIPDYEYILKTSTDDAIECFGELKGSIGKKQNVELCVYDISKNHYIKLFKQMNQDTVEEKEKINDSGNEKDNHNFNSNGHVNNYNDSNNNNNNNNNNYNNNNHVNNYHDSNNINDNIIFTKNSSGHINEDNKTKGAKHNKEDYYVISKKYHTKQYLRNYPHLRARTKLYSSLFRLKSDIIFETFNFLKKKKNYTYINTPILTSNDCEGAGKLFYATTLFDQQIKNEQREEDHMKKGITNE…	722	1	HMM: MRIYFITLIYFFTLLFLLTKCI, NN: MRIYFITLIYFFTLLFLLTKCI	yes	GO_0006421, GO_0006418	GO_0006421	GO_0006421,GO_0006418,GO_0006421	0	0	0	0	0	0	0	0	0	0	0	0	0	0	0	0	0	0	0	0	0	0	0	0	0	0	0	0	0	0	0	0	0	0	0	0	0
970	PF3D7_0514300	aspartate--tRNA ligase, putative	null	ATGATATATGTTGTGAAATATATATTTTTGATTTGCTATATAAATACATTATTTTTAAGAAGAGTTTTATTTTGCTATTCATATAATTTATCACAACATTTTTCTTTATACAATAATTCAAAGTTTGTGTTATTCAAAAGAAATAAAAAAAGAAACAAAATAAATAAATATCATAATATTTATTATCATAAGGGTGGTTTTCATTATGAAAATAATATCGGGAATAATAATATAAGTAATCCATTTTTTTTAAATAAGTTTATATATAATAAGAAGAAGCATAAATTGAATTTTTTTAATAGTCCTACTTCTTCTTATGATGATGCGTGTATTTTAAAAAATCTTTTTAATTCCTTTACAACAGAGAGAAGAATAAAAAATAAAAAGAGTGATAAAAAT…	MIYVVKYIFLICYINTLFLRRVLFCYSYNLSQHFSLYNNSKFVLFKRNKKRNKINKYHNIYYHKGGFHYENNIGNNNISNPFFLNKFIYNKKKHKLNFFNSPTSSYDDACILKNLFNSFTTERRIKNKKSDKNVKMNVMIKKKCMLYLTFNRKENDNIINNNNNDNNKNNNNNNNNDNNNYHVDESYLSNIGEPCILLRSTSWGHLSLFYGSHLNRDYYTYEDIIKYIETNEKKFVKCINNNIYNNNDNNNTDITKQTFIDKKYILIRGRMERKKKQSKRIFLYLRLSNGMYLTCVYEKKIPTNKNNQSIYSIDNMYTYIKNLKNESVIDVVGRIKLHGTLYKHNISYIESLLNQTVIELVAEQINCISESFYNPPFMINDNDVHTNKIQMVIRGDNNK…	1128	0	HMM: MIYVVKYIFLICYINTLFLRRVLFCYSY, NN: MIYVVKYIFLICYINTLFLRRVLFC	yes	GO_0006418	GO_0006422	GO_0006418,GO_0006422	0	0	0	0	0	0	0	0	0	0	0	0	0	0	0	0	0	0	0	0	0	0	0	0	0	0	0	0	0	0	0	0	0	0	0	0	0
22	PF3D7_0102900	aspartate--tRNA ligase	null	ATGATAAACTGCCTATTACAGTTGAATGGTAGATTGAATTATTTAAAAAAATATTTATTATTAATAAATTTGTTTAATTTAAAAAATAAGGATATAAATTTTATATTAGTAAGAAAAGGTTTGTTTGTATGTGGTCTTAGAAAAATGGAAAAGGATGATGTTGTGAGTAGTACCCCTGCAGCTACGGAAGAAGCTGTGATGAATGATAAGAAGAAAGAGAAGAAGGCTAAAAAGCTAGCTGAGAAAGAATTAAAGTTAGCTAAGAAATTGGAAAGAGAGAATTTAAAAAATGAAGCAGCAAAAGTATTAGATTATGTTTGTGAAGATATAAATAAAGATAATTATGGGTATATAAAAGTAAGTACATTACAAAAGTATGCAGATAGTATTATGGAATTA…	MINCLLQLNGRLNYLKKYLLLINLFNLKNKDINFILVRKGLFVCGLRKMEKDDVVSSTPAATEEAVMNDKKKEKKAKKLAEKELKLAKKLERENLKNEAAKVLDYVCEDINKDNYGYIKVSTLQKYADSIMELYNLEDIYNFFVKSEDCENEKREICVDKNVGDVKDAYNEENLLGKKKIWVRGRIHDIRSKGSIAFIILRHKLYSLQCILDIKNNNNDKNMMKWVSNLSLECIVDIYGEIKKPEIPIDSTNIKYEIHINKIFCLSKTMKELPFLLKDANMKETNDEITIKVNQDNRLNNRCFDLRTYANYSIFSLQSVICHIFRTFLLQHNFVEIHTPKLLGESSEGGANAFKINYFNQNGYLAQSPQLYKQMCINSGFDKVFEVGPVFRAENSNTYR…	626	0	null	no	GO_0006422, GO_0006418	GO_0006422	GO_0006422,GO_0006418,GO_0006422	0	0	0	0	0	0	0	0	0	0	0	0	0	0	0	0	0	0	0	0	0	0	0	0	0	0	0	0	0	0	0	0	0	0	0	0	0
4444	PF3D7_1357200	glutamate--tRNA ligase	null	ATGATATTTATTTATTTTTTTTTTGTCACCTTAATTATAATTAATTTGAATACCATAGAATCAAAATATTTATTTGGATATTCATATAATGGTAATCCAAAATGTCCTATAAATATATTATATGATAAAAAATATATATATTCCTTCATCTTAAATAATAATAAAAGGAATACATATAATTCAAGAATAAAGTGTGCAAAAAAAAGTTCAATAATTCCTAATGAAATTGTTGAGGGTAAAGTACGGTTAAGATTTGCTCCAAGCCCAACAGGTTTTTTACATGTTGGGGGGTGTAGAACTTTTTTATATAATTATATTTTATCAAAACAAATGAATGGATCTCTAATACTTCGATTGGAAGATACAGATATCAAAAGAAACACCAAGGATTCATTAGAT…	MIFIYFFFVTLIIINLNTIESKYLFGYSYNGNPKCPINILYDKKYIYSFILNNNKRNTYNSRIKCAKKSSIIPNEIVEGKVRLRFAPSPTGFLHVGGCRTFLYNYILSKQMNGSLILRLEDTDIKRNTKDSLDEIIKDLNWLNLTWDEGPDKVGEYGPYKQSEKIQLYKKIAHQFVNEGKAYFCFCSKEELQEIKEKSKMMKKKYIYNRKCRDMNNEQIKMKLEQNIAYTIRFKSPLKRKIILKDILKGDIIDEVLEDFIILRSNELPTYNFSVSVDDYLMKITHVIRGVEHISNTFKQILILETLNADIPHYAHIPVITTEEKKKISKRNNEYLIRNLREEGFKPECVVNYMTTLGWGSISKKEIYTMSELIDTFNIHKLNKSSVVFDIKKLKWMNKK…	574	1	HMM: MIFIYFFFVTLIIINLNTIESK, NN: MIFIYFFFVTLIIINLNTIESK	yes	GO_0006424, GO_0043039	GO_0006424	GO_0006424,GO_0043039,GO_0006424	0	0	0	0	0	0	0	0	0	0	0	0	0	0	0	0	0	0	0	0	0	0	0	0	0	0	0	0	0	0	0	0	0	0	0	0	0
4367	PF3D7_1349200	glutamate--tRNA ligase, putative	null	ATGATAGAGAATACCAAAGTGAATATATTTTATGGAAATAATAAGTATCCATTTATTTGTAAGAGCATTTTGAATGTATATAAAAATAAGAATAAGAAGATTCTTGAGAAAACGGAAACTACTGTAAATGTTGATGAGAACATAAAGTTTATAAAGGATGCAAATGTCGAAGAACTAAAAATTGAATTTTTAACTAACGCTCCGAACAATAATAACAATAATAATAATAATAACAATAATAATAATAATAACAATAATAATAATAATAATAATATTAATAAGGGTAATATGAACCACTGTGGTAAGAATCAAGAAGAAGAAAAAAAAAACTTAAGCAAAAGTAATAATATTGAAAAGGTACCATATATTTGTAGTAGTGATAAGATATTCGCCAAAATA…	MIENTKVNIFYGNNKYPFICKSILNVYKNKNKKILEKTETTVNVDENIKFIKDANVEELKIEFLTNAPNNNNNNNNNNNNNNNNNNNNNNNINKGNMNHCGKNQEEEKKNLSKSNNIEKVPYICSSDKIFAKILDHLLKTDLYNISEKIDPKNNKVVNIYVQTQYEEWLDFFRSRNVNKDIVFICEHLNKHLHLNTFVVSEYLTLSDIFIYFQMYKYFHVSSTQYAKYSKMYKNINRWHKLIDSLIYFEDAEWKKNLKCLICDNKMNFDDRKDNLKNNNKSMNNTDDVKCKKKTVTTSYSGKLENAVIGNVVTRFPPEPSGYLHVGHAKAAFLNNYYAQMYEGKMLLRFDDTNPVLEDIKYEKSIIEDLENLGLKYEKISYSSDHFDLLEKYCIDMIKM…	863	0	null	no	GO_0006424, GO_0043039, GO_0006418, GO_0006412	GO_0006424	GO_0006424,GO_0043039,GO_0006418,GO_0006412,GO_0006424	0	0	0	0	0	0	0	0	0	0	0	0	0	0	0	0	0	0	0	0	0	0	0	0	0	0	0	0	0	0	0	0	0	0	0	0	0
4788	PF3D7_1420400	glycine--tRNA ligase	GlyRS	ATGATAATTATTGTAATATTTCTCCTTTCTATGTTTTTTTTTGAGAATAAAACGTATTGTTTTATTTCTAAGATAAATATAAAAAACTTACGACATAATAAAAATAATAATAATAAATATCATTTATTTGCCTCTAGAGAATTAAGAAAGATTAGCTCCTTTGTGTTGGATAATAGAATATTATTTAATAAGCAAAAGATAAGAAAAAGAAAATTTAATTTTTTTAATGTTTATTCTAACAAAATGAGTGATATGGATAATATAAAGGAACAAAAAGAGAATGATGGATGTGGTAGTTTGGAAGAGCTTATAGAAAGATACGTTTGTGAAATATCATCCTTGATAGAAAGAAATGAATGTATTAAAGGAATAGACGATGAAGATTTAAAAAAGGAATTT…	MIIIVIFLLSMFFFENKTYCFISKINIKNLRHNKNNNNKYHLFASRELRKISSFVLDNRILFNKQKIRKRKFNFFNVYSNKMSDMDNIKEQKENDGCGSLEELIERYVCEISSLIERNECIKGIDDEDLKKEFMENEKLLQDKKMKLKDLYGKPSEELKLVENRTKLENLVKRKFFYTNSFEIYGGASGLFDYGPSGCLLKSELENLWRCHFIYYDEMLEISGSCVTPYQVLKTSGHVDRFTDLMIRDVVTNDCYRADKYLGDFLKAKIEELRKKNTKGDEHVDEKEKKQKRDDDINENKENNKNNENNKNDENNENNKNDENNKNNDNNNNNNNSCNYNCDMVGGLHNGNERLIQKIELILRKLDGMNEEEIKEIIKEYNIKSPLKNDLSEPFPFNLM…	889	0	HMM: MIIIVIFLLSMFFFENKTYCF, NN: MIIIVIFLLSMFFFENKTYCF	yes	GO_0006426, GO_0006418	GO_0006426	GO_0006426,GO_0006418,GO_0006426	0	0	0	0	0	0	0	0	0	0	0	0	0	0	0	0	0	0	0	0	0	0	0	0	0	0	0	0	0	0	0	0	0	0	0	0	0
5024	PF3D7_1445100	histidine--tRNA ligase, putative	null	ATGAGTATAAGTATTTACAAAAGTAAAGTATTCAATAGCAAGGATATTGTGGATATTAGCATCCATGAAAAAAATTTGAAAGTAGAGCCTTCCAGCTTTAAAGATTGTTTTTATAGATTGAATGATAAAAGAATAAATATTGACGAATTAGAAAATAAAATAGAATATCACTTATTAAATGATGAAATTAGGAACAATAATAATAATAATTATGATAATAGTGTGAAGAAAGAATATATTGTTGAAAAAGATCAAAATGATGAGAAATGTAATAATAAAAAAACAAATGTTTTTGATATAAAATTAAATAATGATTTAAATTATAATATGCATTTAACATCTAATAATTTAGAAGAAATAAAATGTTTGTATTTTTTCTTTTTAATTAATATTTTAAGA…	MSISIYKSKVFNSKDIVDISIHEKNLKVEPSSFKDCFYRLNDKRINIDELENKIEYHLLNDEIRNNNNNNYDNSVKKEYIVEKDQNDEKCNNKKTNVFDIKLNNDLNYNMHLTSNNLEEIKCLYFFFLINILRFKNNLDLNVIRSICTHINNISNNDKNNNQYMCIDKIKENCLYSLKLKDFFVSVLKQCGKNEYNLNDFNRSIHIVIEKSSVIFLNTYKIVSSCKYLTCCFANLLEIFNLNYDILFMNSFNNNINNSNIKSINNIVSNLKWMLHDSKIEKNSNLSKKFSSNILLYIYTQSKLTDECEYFMNLINQNFKNSIESFTHEYNEEMTSIDTYINILCNNMNQTFYIYIDNLLNMCKNIMPLYIEKLNEFLLSEERIITHNVNFKKPPVDGII…	1132	0	null	no	GO_0006418	GO_0006427, GO_0006418	GO_0006418,GO_0006427,GO_0006418	0	0	0	0	0	0	0	0	0	0	0	0	0	0	0	0	0	0	0	0	0	0	0	0	0	0	0	0	0	0	0	0	0	0	0	0	0
1370	PF3D7_0622800	leucine--tRNA ligase, putative	null	ATGGCGAGACGTATGAACTTATTAACTATTGAAAAGAACATTCAGCATTTATGGAGGGAACATAATGTTTATGAGAAAGATTTTAGCGATATGAATGAAAGCCGATATACAGGCAATTTCCCTTACCCTTATATGAACGGTTTATTACATATTGGTCATGCTTTTACTTTAAGTAAATTGGATTTTATAGTTCGATATAAAAATATGGTTTGTGATAATGTGTTACTTCCGTTTTCGTTTCATTGTACAGGTACACCTATTGTTGTGTGTGCCGATAAATTAAAGAATGAATTAAATAAGAAGAATATACAAGATTTTGAAGATATATCATATGAGAAGAAGGAAGATGATTATTCTTTATGTAGATCTATTAGTGATGATAAAAATAATGTAGATAAG…	MARRMNLLTIEKNIQHLWREHNVYEKDFSDMNESRYTGNFPYPYMNGLLHIGHAFTLSKLDFIVRYKNMVCDNVLLPFSFHCTGTPIVVCADKLKNELNKKNIQDFEDISYEKKEDDYSLCRSISDDKNNVDKNKLVEDTDSNKKNTDVTIFRSNKSKAQSKGSKQNTQYDIMKQMNIKDEEIHLFQNPEYWCYYFSSKAKDHLYSFGLYCDWRRSFITTNINPYYDKFVSWHINTLYKKNLIYYGSRVTIFSRYNNQACADHERSEGEGVKCQEYTLIKIFVSNVKDFYSIFMNSIRSSQSVLNACIEKKEAPNNNNNKINNNKINNNKINNNKINNNKSNNNKSNNNNNCGSSANISNTFFTDFEKGEEDLKNKIWNEDFFVKDKKVIFLGSTLKPE…	1447	0	null	no	GO_0006418	GO_0006429	GO_0006418,GO_0006429	0	0	0	0	0	0	0	0	0	0	0	0	0	0	0	0	0	0	0	0	0	0	0	0	0	0	0	0	0	0	0	0	0	0	0	0	0
2034	PF3D7_0828200	leucine--tRNA ligase, putative	null	ATGTTTTTTAAGTTTGTCCGCTTTTTAATATACATATTTCTGTACTCCTTATGCTATCAACATGTTAACAATGTTTTTGCGTTACATATTAATAAATATAAGAATGTGTTTTTATTTGAATCACCTAGTGTGTTAATAAAGAACAGAAGAAACTATAAGAGGAAAATATATTCACATGACGAAGAAAAAGGAAAGTACGATTTTCATAGGATTGAGGAAAAATGGCAAACCATATGGAATTCAAAGCGTTTGTTAGATAAGGACTTTGAGCAGTATAACAAAATTAATTTGGGAAGAAAAGAAAAAAAGGAAAAGAGACATAAGGATAAACAAAATGGTTTCATTGACAAACCATATAACGATGTATACGAAAAAGGTGATAATACATATAAATATAAT…	MFFKFVRFLIYIFLYSLCYQHVNNVFALHINKYKNVFLFESPSVLIKNRRNYKRKIYSHDEEKGKYDFHRIEEKWQTIWNSKRLLDKDFEQYNKINLGRKEKKEKRHKDKQNGFIDKPYNDVYEKGDNTYKYNKKKFYILDMFPYPSSEGLHVGHILCFTITDIISKFKKMNNYCVFHPIGWDSFGLPCDRLSMKKKIDPREIIHKNISNFKNQLIKLGFLFNWESEINTCDENYYKWTQWIIIQLFLNNLSYKKRSYVNWSNELRCVISNDELRNEINLQYLNIQKIKLLQWYLKITKYANRLIKDLNMIHWPMKIKNMQINWIGKKTGIFLKARIISLDKFLNNTHFNFVNIKKSYNNNMINVFYNNIFNHLFFIFINYILSIFTFHMYINNPNEQK…	1481	4	HMM: MFFKFVRFLIYIFLYSLCYQHVNNVFAL, NN: MFFKFVRFLIYIFLYSLCYQHVNNVFAL	yes	GO_0006418	GO_0006429, GO_0006412	GO_0006418,GO_0006429,GO_0006412	0	0	0	0	0	0	0	0	0	0	0	0	0	0	0	0	0	0	0	0	0	0	0	0	0	0	0	0	0	0	0	0	0	0	0	0	0
4757	PF3D7_1416800	lysine--tRNA ligase, putative	null	ATGAAAAAGAAGAAAAGGCCATATATAATTCTCCTATTTTTATTGTTCCCATTAAATATTTTTTTGTCCTTTTCATTTATTCGTTATAATTCCATATCATTTAAAAATAATCAAAGTAATAAAAATAATTTTTTTTTTGTTCCAAATGAGTGTATAGGTACAATATGTAATAACAGGAAAAAAAAAAAACATTTTTCCTTGTATAATCATGGAAAAGAATTTCATGAAAGAGTAAAGAAATTACATATTTTATCAGATGCTTTAAATATTGATGCTTATCCATCCTCTTTTATAAAAAGAAATATAAAGATAGATGATCTAAAAAAAAAATTCGAACATTTAAAAGATGGAGAAAGGGATGATAAAATATATGTGATATATGGCAGAGTAACCGTTAAA…	MKKKKRPYIILLFLLFPLNIFLSFSFIRYNSISFKNNQSNKNNFFFVPNECIGTICNNRKKKKHFSLYNHGKEFHERVKKLHILSDALNIDAYPSSFIKRNIKIDDLKKKFEHLKDGERDDKIYVIYGRVTVKRNNGMFMNIQDDEGNIQIYLDENLPIKGKKNDNKKINNNKIEEVPNKYHMENNTVSSILSNNNKTNNNDYVINDQSYNEKYETYNNQIMARKIIELGDFVAVKGFVRKTLRGEITLHVKDIYMLSKSLLPLPDKYKGMKDVEYKYRKRYLDFLTNNDQKDKIKARYDIIQEIRKYLLKRNFLEVDTPILQLIPGGATAKPFETYLKSLNLILYLRISPELFLKKLIVSGISEQIFELSKCFRNEGLSSIHNPEFTMLEIYKSYTNY…	674	1	HMM: MKKKKRPYIILLFLLFPLNIFLSFSF, NN: MKKKKRPYIILLFLLFPLNIFLSFSF	yes	GO_0006418	GO_0006430	GO_0006418,GO_0006430	0	0	0	0	0	0	0	0	0	0	0	0	0	0	0	0	0	0	0	0	0	0	0	0	0	0	0	0	0	0	0	0	0	0	0	0	0
2510	PF3D7_1005000	methionine--tRNA ligase, putative	MRSapi	ATGAAAATTTATTTTATTTTTATATTATTTTTGTATCTAAATTTTTTTATTTTAATTATAGAAATATTAAGCAAAGATATAATAAAAACTAGACGCTCTTTTCCTTCATATATAAAGGATGGAGAGAAAAGAAAAAGCAATAAAATAAAAAGAAAACGAATAAAAAATGATGCTTATATAAATGTTTATAGGAAAAATATATTGGATAGCATAAATATAAAAGGTGATCAAAATAAAATTAAAGAAAAATGGTTGCAGAATTTAAAAAAGAAAAAAGCATTTGACAAAATAAGTGTGCGTTTATCAAATTATAATGATGATAAAAAAGAGATATTTGATATAACGTTTGTAAATAATAAAGAAGACAGGAATGATGATAATTATGATAATAAGAGTTGT…	MKIYFIFILFLYLNFFILIIEILSKDIIKTRRSFPSYIKDGEKRKSNKIKRKRIKNDAYINVYRKNILDSINIKGDQNKIKEKWLQNLKKKKAFDKISVRLSNYNDDKKEIFDITFVNNKEDRNDDNYDNKSCIKKVCNAEEYLLISTPVYYSNDRPHIGHAYCNILCDVLYKYEKLKGVEKKKKGIIFFSGMDEHGLKIEKKCNKNKMKIIEYIDDISNYYKDMNKKLSVDVNLFYRTSYSFHKMFVQNVWKYLVHNNYIYKDTYKGYYNINEERYISEQELREGKYKIDNENIIYVEEENSYFFNILKFKDYLIDFYEKNENFIYPPYLRKQVIYTLKNELRNICISRYNTKWAIQIPNEAEGTIYVWFDALLSYVSSMLYLHKIKKNNNNNNNNNN…	749	1	HMM: MKIYFIFILFLYLNFFILIIEILSK, NN: MKIYFIFILFLYLNFFILIIEILSK	yes	GO_0006418	GO_0006431	GO_0006418,GO_0006431	0	0	0	0	0	0	0	0	0	0	0	0	0	0	0	0	0	0	0	0	0	0	0	0	0	0	0	0	0	0	0	0	0	0	0	0	0
2815	PF3D7_1034900	methionine--tRNA ligase	MRScyt	ATGATGAAGCCTTTAAATATGATTTTATATCCTCACAAGTTTTTTTTGAATACAGTAAAATGTATGCTTGCTGCTCATATATACAATTTTAATGTAGAACTTAGTGAAGACTTTTTATATACTAGAACATTTGATATTGAGAAAAGTTTAATAATTAATAAGAAGCCATTATTAATATATGAGAATAACTATGTGAGTTCAACTAAGGCTATATGTTTTTTATTTCATCGTTTACGAAATAAAAGTAAGAAACCATTTGATGAGAACCTTAGTTATTATTTAGGTTGGTTAGAATGGAGTGATCTTTTAGAGAAGCATATAGAGGTGTTAAATAAGAAGAATATTATAGAAAGTTTAGATGAATTAGAATTGTATTTAAAGGAAAATAAAAATAAGAAT…	MMKPLNMILYPHKFFLNTVKCMLAAHIYNFNVELSEDFLYTRTFDIEKSLIINKKPLLIYENNYVSSTKAICFLFHRLRNKSKKPFDENLSYYLGWLEWSDLLEKHIEVLNKKNIIESLDELELYLKENKNKNKNFINNDDEKDENKLSLADIFVYTSLKHSCIEICKESWVHINEYIEKINNLQEIQNVIKNVEEIYKYKNIYSVFISKIHDKNVNEYLKNETFYITTAINYVNGDPHIGHAYEIVLADAIARYHKIIGRDTFFTTGADEHGLKIANQAAKNNMTPKELCDKNVLKFQNLNKLLYVEDDYYVRTTRDSHKKIAQEVWDKCEKNGDIYLGEYEGWYNVREETYVPENEAKLMNYIDPLNNIKLEKMKEPSYFFKMSKYQDKLIEYIQSN…	889	0	null	no	GO_0006431, GO_0006418	GO_0006431	GO_0006431,GO_0006418,GO_0006431	0	0	0	0	0	0	0	0	0	0	0	0	0	0	0	0	0	0	0	0	0	0	0	0	0	0	0	0	0	0	0	0	0	0	0	0	0
2903	PF3D7_1104000	phenylalanine--tRNA ligase beta subunit	null	ATGCCTACCATATCAGTGTATGAAGATGATTTATTCGAAAAGCTTGGGGAGGAAATTATAGAAGAGAAATTATTGGATGTTTGTTTTGATTTTGGTCTTGAGGTAGATGATATTGAATATAAGAATGATAAGAAAATATATAAAATCGAAGTACCAGCTAATAGATATGATTTAATATGTGTAGAAGGATTATGTCGTGCTTTAAAAAATTTCATGTGTAAATTTGATGATATAAAATATGATATATCAATGAATAATTATGATATATGTATAAAAGGAAATCAATATATTAAAGTAGATGGATCTGTTGATGATCGAAGAGGTTATGTTGTTTGTTGTGTTTTAAAGAATATGAATATAAATGATAGTGTATATAATAATATTATAGAGATACAAGAA…	MPTISVYEDDLFEKLGEEIIEEKLLDVCFDFGLEVDDIEYKNDKKIYKIEVPANRYDLICVEGLCRALKNFMCKFDDIKYDISMNNYDICIKGNQYIKVDGSVDDRRGYVVCCVLKNMNINDSVYNNIIEIQEKLHHNLGKKRSVLAIGIHDYDKIKFPLKYKFEKKEKINFIPLNEKTNLNGMNLIDFYSKNLNLKPYLKIIKDFDKYPIIVDSNEQILSLPPIINCDHTKISLNTKNVFIECTAIDRNKAQIALNILCSMLSEYCVPKYSIQSFVVIYENQDFSDDQNLKKKETQFLYPIFENKSLTCNIDYVRKLSGISHITVHEVNNLLKRMMLSCDIMDNNTFKVTIPFYRSDIMHCCDIIEDIAIAYGYGNIKYEPPQICKKHSLNNCSELFR…	623	0	null	no	GO_0006432	GO_0006432	GO_0006432,GO_0006432	0	0	0	0	0	0	0	0	0	0	0	0	0	0	0	0	0	0	0	0	0	0	0	0	0	0	0	0	0	0	0	0	0	0	0	0	0
1178	PF3D7_0603700	phenylalanine--tRNA ligase	mFRS	ATGTTATTACCCAAAACTATCTTATCAAATGAAGGAAGAATATTATGTAATACGATAAACCACCCATTGAGAACTGTAAAAAATAAGATCGAAAATTTTTTCAAGTTTGAAAATATTGACAATTTAAAAAGTGAAATATGTATAAAACAAAATTTCGATGATCTTAATGTACCTTTAACACATCCTGTAAGAAATATTAGAGATACCTTTTATTTAAATGAAAATTATATAAAGAACTATAATTCTATTCTTTCAACATATTATATACCATTTGATATTTTAAATACATTTTATAAATATTATTTAAGCAACAAATTATTATCTCATGATAAAATAATATTGAAAAGAACTCATATGACGTCACACTTAAATGATTTATTAAAAGGATCTTATACAAAT…	MLLPKTILSNEGRILCNTINHPLRTVKNKIENFFKFENIDNLKSEICIKQNFDDLNVPLTHPVRNIRDTFYLNENYIKNYNSILSTYYIPFDILNTFYKYYLSNKLLSHDKIILKRTHMTSHLNDLLKGSYTNVIYTGQVYRKDEIDKYHYPIFHQTDGFLIKPEMFNVEIELKQKLEQLIYYLFNKNNIEIKWESDTSFPFTHPSYELYIKRKQDNKWIEILGCGKIKNEVLAMSLYHNHINKIIENEITIYNKTLLNSFQQKFLSNEKETIRQSHLINHLCNKQLNHNIQIKINELLKSINYQGWAFGIGLERLCMLLYDINDIRLFWSNDKRFINQFKENQITTFRPFSNFPCIQKDISFYIKQYFNETSFFQICRDIANDNIEQIQKIDKYYDPK…	443	0	null	no	GO_0006432, GO_0043039, GO_0006418, GO_0008033	GO_0006432	GO_0006432,GO_0043039,GO_0006418,GO_0008033,GO_0006432	0	0	0	0	0	0	0	0	0	0	0	0	0	0	0	0	0	0	0	0	0	0	0	0	0	0	0	0	0	0	0	0	0	0	0	0	0
3667	PF3D7_1232000	phenylalanine--tRNA ligase	aFRS	ATGTTTTTTTCCTTCTTTGTTTGTTTCATATTTGTTATTATTGAATTTATAGAAAGTTATAAAAAAAATCCACAGATCAGCGATATATATTTTAGAAAGCTTAATAAAAATTATCATATAAAAGATGATATAATAAATTACAATAGATTTAAATATGTTTACAAAATAAAGAATCATCCGTTAAATGAAATAAAAGAAGAGGTATTAAATTTTTTAAAAAAAAAAACATCTTTTTATTTAGTATATAATAAATGCCCACTTTATTATAAGAATTTATGTTTTAAAGAAATACTTATAAGAGATACAAACGAAACAACTTCAATAAAAAATAATTTCTATTTTTCTCATGATTATTTATATATTCCTCAAGCTACCTCTTTATTTCCATACATATATGAT…	MFFSFFVCFIFVIIEFIESYKKNPQISDIYFRKLNKNYHIKDDIINYNRFKYVYKIKNHPLNEIKEEVLNFLKKKTSFYLVYNKCPLYYKNLCFKEILIRDTNETTSIKNNFYFSHDYLYIPQATSLFPYIYDLLKNNNKQNIQKCNDTIYVRNNPYSENTPNNNIDVNNNIEKKQDNYINKEIVENNNVHIINNSNILNKQRDNFCIISNIFRKDNIDKLHFPFFNQMDIYFKITNELVHKKKQLVYFLCELLSNIFGPNYKWRIRKDSFDFTTHSLQAEVFHNNKWIEILGSGILKSKIIFNKKKKYEINDYLAVGIGLDRIAMIKWDIDRIRDLYLYIYNTEKNIYSVEQHNEKDKCSQHISNDIFNKNINEYINHNDSYNHNNVKNYFLKNKKNE…	556	0	HMM: MFFSFFVCFIFVIIEFIESY, NN: MFFSFFVCFIFVIIEFIESY	yes	GO_0006432, GO_0043039, GO_0008033	GO_0006432	GO_0006432,GO_0043039,GO_0008033,GO_0006432	0	0	0	0	0	0	0	0	0	0	0	0	0	0	0	0	0	0	0	0	0	0	0	0	0	0	0	0	0	0	0	0	0	0	0	0	0
89	PF3D7_0109800	phenylalanine--tRNA ligase alpha subunit	cPheRS	ATGAGTACGAATAATGTGGAAGAGAAAAAAAATGAGGAATTATATAATTTGCTGAACATACTTGAAGAAGAATTTAATTTGAGTAAGATAGAAAATAAAAATAATAATAAGAATGATGATGGTGATGATGATGATGTTAATAAAAGAGAAGATAATAATAATAATGAATATTACAAAAAATTAAAAGATGAGAAAGGTTTAGATGTACTTATAAATGAATATACAACATCCTTAAAGATAAGTAAGAAATATAATATTGATCATAATAAAGTAATGGGTATGATTAAAAAACTTGAAACATTATATTATATTATTAATCTTATTAAATCTTTTAATACATATCATTTGAGTGACGAAGGTAAACAATATTTAAAAGAAGGTTCTCCTGAATTTATTGTT…	MSTNNVEEKKNEELYNLLNILEEEFNLSKIENKNNNKNDDGDDDDVNKREDNNNNEYYKKLKDEKGLDVLINEYTTSLKISKKYNIDHNKVMGMIKKLETLYYIINLIKSFNTYHLSDEGKQYLKEGSPEFIVIKYVIQNNKCTLEDLKKNLGKIGDIGLNTNLKNRTIQLNKADKCLTCNCNLHDIQDFTQIYLDIINQYGHDEELLFAHLKNKNHTKNALNNNEMKNSCKDNNIINNLIQDLKKRKLLEIKKNSYSHVIKTSIFKKDIKKQITDINYLLLKNEEYKKYDIKKYNFFSSGKKINKGNIHLLTKQMRTFKEIFFSLGFEEMETHNYVESSFWCFDALYIPQQHPSRDLQDTFFIKEPETCIDKFVDTEYIDNIKRVHTHGDYGSFGWNY…	575	0	null	no	GO_0006432, GO_0043039, GO_0006418	GO_0006432, GO_0042493	GO_0006432,GO_0043039,GO_0006418,GO_0006432,GO_0042493	0	0	0	0	0	0	0	0	0	0	0	0	0	0	0	0	0	0	0	0	0	0	0	0	0	0	0	0	0	0	0	0	0	0	0	0	0
1620	PF3D7_0717700	serine--tRNA ligase, putative	null	ATGGTTTTAGATATAAATTTATTTCGTAAAGAAAAAGGAGGGAATCCTGACAAGATTAAAGAGTCTGAAAGGAAACGTTATCATGATGAAAATAATGTAGATAAAGTTATTGAATATGATGATAAGTGGAGGAAGTGTATATTTGAACTCGAAGAATTAAAAAAAAATATAAATATGATAAATAAAGAAATAGGAAATAAAAAGAAGGTTGACAAGAATGCTGATGTTGAAGATTTGAAAAAGAAGAGTTTAAATATAAAGGAAGAAATACCTAAATATCAATTGAAAGAAAAAGAATTATTAAAAGAAAGAAATAAGTATATAAGTAAAATCGGTAATTTATTAAATATTAAGGTAGTATGTTCAGATAATGAAGATAATAATAAGATAGTTAAAACA…	MVLDINLFRKEKGGNPDKIKESERKRYHDENNVDKVIEYDDKWRKCIFELEELKKNINMINKEIGNKKKVDKNADVEDLKKKSLNIKEEIPKYQLKEKELLKERNKYISKIGNLLNIKVVCSDNEDNNKIVKTWGECKILPACEENDNSIHDNVVNSNNIKRETLNNEVDNKKKIKYYYHYDLLRKIGGANFKKGIQVAGHRGYYLTGAGFLLHNAILQYALNFLVNKKYIPVYPPFFMKKNIMEECAELDDFEETLYKIPSTSNSTLSSQQVSTSPTKISSQADIKDDTTCNSQKKTNIPSNEDLTRDDLFLIATSEQPLCALHKDETIESKRLPLKYAGFSSCFRKEAGAHGKDIRGILRVHQFDKVEQFCIALPQHSNKIHEEMIQTCEEFYQSLN…	539	0	null	no	GO_0006434, GO_0006418	GO_0006434	GO_0006434,GO_0006418,GO_0006434	0	0	0	0	0	0	0	0	0	0	0	0	0	0	0	0	0	0	0	0	0	0	0	0	0	0	0	0	0	0	0	0	0	0	0	0	0
3514	PF3D7_1216000	serine--tRNA ligase, putative	null	ATGCATTTAAGTAAAATAATTTTCCTTCTGATCATATTATTTCCTTATCATGTGAACTCGAGAAAACCCATTAAATATAAAAATGTAAATAATGTATTCATTGAAATATATCCATGTAAAGCTATTAAATGGGAACGTAAAAAAAAAAAGAGAGATTTAATAAAAAATAATAAATTAATACATAATGTAGATGTTAATTATATTAATATGATAACAAATGATAATCATATATCATCAGAAAAATGTAGAGATATAAAAAAGAAAAGAAAAATTACAAGTAGCGAGTATGGAATGAGTCTTGAATTTTTTAAGAAAAATCCAAAAAAAGTTGTTCAAAATTTGAAAAAGAGAGGTATGGAAAAATATCTAAATGTTATTGTGATGCTAAAAAAATTAATT…	MHLSKIIFLLIILFPYHVNSRKPIKYKNVNNVFIEIYPCKAIKWERKKKKRDLIKNNKLIHNVDVNYINMITNDNHISSEKCRDIKKKRKITSSEYGMSLEFFKKNPKKVVQNLKKRGMEKYLNVIVMLKKLINEKNENEVLRNKLRNRRKLLSDHIKNLIFNSKKYEDIINRDITNDSDHKTNLIHVDEEKKKTEKKNDTQDILKDNQKIRYINKENQATNNNINNQDNSNDVLKKNKIQIEEIKKETNQINKDIDHIEMNIINLKKKIEFNLYKLPNILLNKVPKGKTTEDNKIIKFYKKENIIQLNNEEYDFIEPHEEIIKKYENNFIFSNISNKIGFGYNILVNDIAKLERALIDFMINTHVNKFLYTYVKAPEIVTKSALFNTGQLPKFEEDLF…	618	0	HMM: MHLSKIIFLLIILFPYHVNSR, NN: MHLSKIIFLLIILFPYHVNSR	yes	GO_0006434, GO_0006418	GO_0006434	GO_0006434,GO_0006418,GO_0006434	0	0	0	0	0	0	0	0	0	0	0	0	0	0	0	0	0	0	0	0	0	0	0	0	0	0	0	0	0	0	0	0	0	0	0	0	0
4250	PF3D7_1336900	tryptophan--tRNA ligase	cTrpRS	ATGGATAAATTGAAAACTATTTATTTGGATTCTGCTTTGAGTATAATTAAAGGAGCTTTATGCATTATTCTTCAAATACCAACAAGTAGAACTACAGAAAGTGTAAAAAAAAAGGCAAACAATGTTGGTGTTATCACAGTAAAATCGATTTTGTCAGAACCCACAATTCATCAGTATGACGACATAAAGAAACTAATTAAAAATAAACTTCAAGAATGCGTCCCTTTTTATAATTATAATATGAATCGTTCTTTTGCTGAGAAAATTTACGGAGACTGCATCTATGATAATTATGGATTGTCAAAAGAGATTAATGAAATAAATTTAATAATATTAGAAGAGTGGAATATTAATTGTAATAAAAATAGAGTTTTAAAAAATACAGGATTAATTAAAGAA…	MDKLKTIYLDSALSIIKGALCIILQIPTSRTTESVKKKANNVGVITVKSILSEPTIHQYDDIKKLIKNKLQECVPFYNYNMNRSFAEKIYGDCIYDNYGLSKEINEINLIILEEWNINCNKNRVLKNTGLIKEITINQFKYSTNKESLEVHFAVSPKYTFEELSTMYKNEKGLYEFLLSPIIKIICNENDKKLLDNMNEECTYLNAEDILPKNKVLPPSGIENIDYERSKDVTPWDVNINNEEGINYNKLIKEFGCSKITENHIKRIEKLTNSKAHHFIRRGIFFSHRDLDFLLNYYEQHKCFYIYTGRGPSSLSMHLGHLIPFYFCKYLQEAFNVPLVIQLSDDEKYLFNQNYSLEYINTLTNENVKDIISVGLNPELTFIFKNTEYAGYLYPTVLSI…	632	0	null	no	GO_0006418, GO_0006436	GO_0006436	GO_0006418,GO_0006436,GO_0006436	0	0	0	0	0	0	0	0	0	0	0	0	0	0	0	0	0	0	0	0	0	0	0	0	0	0	0	0	0	0	0	0	0	0	0	0	0
1834	PF3D7_0807900	tyrosine--tRNA ligase	TyrRS	ATGGAAACCACAGATACTAAAAGAGAAGAACAAGAAATTGAAGAAAAAAAAGCTCAAGAAGAATCAAAAATAGAAGATGTTGATAAAATATTAAATGATATACTTTCCATATCCTCGGAATGTATTCAACCGGATGAATTGAGAGTTAAATTATTATTGAAAAGGAAATTAATCTGTTATGATGGTTTCGAGCCATCAGGCCGTATGCACATAGCTCAAGGATTACTTAAGAGCATTATTGTAAACAAACTGACAAGCAACGGCTGCACATTTATATTTTGGATTGCGGACTGGTTTGCTCATTTGAACAATAAAATGTCTGGTGATTTGAAAAAGATAAAGAAGGTTGGTAGTTATTTCATCGAGGTATGGAAGAGTTGTGGAATGAATATGGAGAAT…	METTDTKREEQEIEEKKAQEESKIEDVDKILNDILSISSECIQPDELRVKLLLKRKLICYDGFEPSGRMHIAQGLLKSIIVNKLTSNGCTFIFWIADWFAHLNNKMSGDLKKIKKVGSYFIEVWKSCGMNMENVQFLWASEEINKKPNEYWSLVLDISRSFNINRMKRCLKIMGRSEGEENYCSQILYPCMQCADIFFLNVDICQLGIDQRKVNMLAREYCDIKKIKKKPVILSHGMLPGLLEGQEKMSKSDENSAIFMDDSESDVNRKIKKAYCPPNVIENNPIYAYAKSIIFPSYNEFNLVRKEKNGGDKTYYTLQELEHDYVNGFIHPLDLKDNVAMYINKLLQPVRDHFQNNIEAKNLLNEIKKYKVTK	373	0	null	no	GO_0006418	GO_0006437	GO_0006418,GO_0006437	0	0	0	0	0	0	0	0	0	0	0	0	0	0	0	0	0	0	0	0	0	0	0	0	0	0	0	0	0	0	0	0	0	0	0	0	0
3034	PF3D7_1117500	tyrosine--tRNA ligase	TyrRSapi	ATGATAATATTAAAGGTTTTATTTATATATAATGGTTTAATACAAATAATAAGATGTTATAAAAAGTTTGCTCCTCATAGATTGAATAACATAATTCACGAGAATAATAAAAATAACATAGGTACCTATGATATTAAATCGAAAGCTTTAAAAAAATTATATGAAAGGAAATTGATTCATTATGTAAGTGATATAAGAAATATTGATAAGATATTATATCACAATGAAAATGAGAAAGAAAAGAAAAATAGAAAAAGTGTTTATGCAGGTATTGATTTAACATGCAAATATTTGCATTTAGGTAATTTAGTACCTTTGATTACTTTGGATATATTACGTAATCATAATACAGATGTTATTATATTATTAGGAAATAGTACCACACAAATAGGAGACCCT…	MIILKVLFIYNGLIQIIRCYKKFAPHRLNNIIHENNKNNIGTYDIKSKALKKLYERKLIHYVSDIRNIDKILYHNENEKEKKNRKSVYAGIDLTCKYLHLGNLVPLITLDILRNHNTDVIILLGNSTTQIGDPSFQKVERQKTLEKDILENEENIRRTIIELFLQREICEEDMNELIKKSNIERDKEFIYESDNKGSLIILKNSLWYDKMNIIDFLKYGEYFSINKLLRKECFLNKIKKNLTLKDLNYITLQSFDFLHLFNKFKTCIQIGGSDQWGNIQSGIELAQYISNTQLYGLTTNLLVYKNNIKYSKSQFNENKRLPIWIDKNYNSPYLFWNFLRNVEDQKVQSYIDMLTNLKININQEIETVYNPMDTNLNEILDETLDDSNKKKKNNDNNNNN…	561	0	HMM: MIILKVLFIYNGLIQIIRCY, NN: MIILKVLFIYNGLIQIIRCY	yes	GO_0006418, GO_0006437	GO_0006437	GO_0006418,GO_0006437,GO_0006437	0	0	0	0	0	0	0	0	0	0	0	0	0	0	0	0	0	0	0	0	0	0	0	0	0	0	0	0	0	0	0	0	0	0	0	0	0
463	PF3D7_0311200	valine--tRNA ligase, putative	null	ATGACAATTCTCCTGACCTTGTTCATAATTTATGTTTGTTTAATTGGTCATTTAACAAAAGTATATATAAAAGAAAATATATCAAACCAAAAAAAGAATCCACTTAACTTTATTAGGAGAAAGCATAATAACACCAAGAAAAACAGAAAACTTTCATTTAATATAAATAAAAATATTAATCATTGTAAAAGAATTGTTAAGGTGGAACCTTTTTTTATTCATAAAAATGTAAGAAGGTATGTGTATAGAAGAAGCTGTTTTATTTTTAACATTTGGAATAGTAGTAAAGTAATAAAAGATATTTATAAATATATTGATTCATGTACATCCTTTTTGAGGAAATTTAAATCTCTTCCATCCATAATAAATGTAGAAAATAAAAAATATGGGAAATTAGAA…	MTILLTLFIIYVCLIGHLTKVYIKENISNQKKNPLNFIRRKHNNTKKNRKLSFNINKNINHCKRIVKVEPFFIHKNVRRYVYRRSCFIFNIWNSSKVIKDIYKYIDSCTSFLRKFKSLPSIINVENKKYGKLEKRKKEKNDLCPNIFITYSSNNVPRNISNKLEHFIYKQKDIPKEQNILTYDFFKRDEELLNDQNRNDFIKKYYNPSYHCDEHPFEHIYNIKDMEHIYDKSIINYIYDLKRKEEIEYIRKFNRSHYLNSYLLIYPPPNLSGNLHAGHFFNFIHQHIFFLYNKYIMGKYAIPFFGFDHGGLSAHEMFAKHMRGEELGREKYINEIKKWQENLKENMLKDLQNMNITYNEKMLFNTMDKGMIDLINKAFYILYKNNMIINRLYPVYYCKE…	1367	0	HMM: MTILLTLFIIYVCLIGHLT, NN: MTILLTLFIIYVCLIGHLTKVYIK	yes	GO_0006418	GO_0006438	GO_0006418,GO_0006438	0	0	0	0	0	0	0	0	0	0	0	0	0	0	0	0	0	0	0	0	0	0	0	0	0	0	0	0	0	0	0	0	0	0	0	0	0
5193	PF3D7_1461900	valine--tRNA ligase, putative	null	ATGAATATTAGGTTAATTAAAAAAATAGGCATTAATTATATTAATAAATCATTTAATACATATTGTAATAAAAAATTGTCAAAGATGGATATGAAAAATATAAAAGAGAATATAAAAACAATGAAGGATGCATATGATCCTAAGGAAGTCGAATCAAAGTGGTATAGTTTTTGGGAAGAAAATGATTATTTTAAACCGAAAAAAGAATTAATAGAAGAAAATAAGAATAATGAACATATAAAGAAATTTGTGATTATATTACCCCCACCAAATGTAACAGGTACGTTACATATTGGTCATACATTAACAGTAGCTATTCAAGATTCTTTAGTTCGATATAAAAGAATGAAAAATTATTTAACTTTATATATACCAGGAACAGATCATGCTGGTATAGCA…	MNIRLIKKIGINYINKSFNTYCNKKLSKMDMKNIKENIKTMKDAYDPKEVESKWYSFWEENDYFKPKKELIEENKNNEHIKKFVIILPPPNVTGTLHIGHTLTVAIQDSLVRYKRMKNYLTLYIPGTDHAGIATQTVVEKMLYKKENKIRQDYGREEFVKKIYEWKDLHGNKINNQMKRIGASVDWSREYFTMNENLSNAVKEAFIKFYESGLIYRDNRLVAWCPHLKTALSDIEVNLEEIKKPTKIKIPSFDHLVEVGVLYKFFYQIKDSEEKIEIATTRIETMLGDVAVAVHPKDKRYAHLIGKEIVHPFIPNRKIIIIADDFVDMQYGTGAVKITPAHDKNDYDMMKRHNLNYINIFTLDGHINENGGKLFQGQHRFECRFKIQEELKKLNLLSDK…	1090	0	null	no	GO_0006418, GO_0006438	GO_0006438	GO_0006418,GO_0006438,GO_0006438	0	0	0	0	0	0	0	0	0	0	0	0	0	0	0	0	0	0	0	0	0	0	0	0	0	0	0	0	0	0	0	0	0	0	0	0	0
3422	PF3D7_1206700	eukaryotic translation initiation factor 5, putative	EIF5	ATGTCGTACGTTAATATTCCTAGGGATCGGAACGATCCTAATTACAGATACAAAATGCCCAAATTAATTTCTAAAATAGAAGGAAGAGGTAATGGTATAAGAACTAATATATCTAATATGGGTGAAATAGCTAGGTCATTAAAACGACCACCAATGTATCCGACAAAATTTTTTGGTTGTGAATTAGGTACTATGGTAAAGTTTGAAGAAAATGAAGAAAAAGCTATTGTGAATGGAGCACATAAAGAAAAGGATTTAGTAAATATATTAGATAAATTTATTGAGATGTATGTTTTATGTCCCCATTGTTTATTACCCGAAACGGATATTGTTGTGAAGAAAGGTATTTTAATATGTAAATGTAATGCTTGTGGTAATATCGGAGAACTTAATAATTCT…	MSYVNIPRDRNDPNYRYKMPKLISKIEGRGNGIRTNISNMGEIARSLKRPPMYPTKFFGCELGTMVKFEENEEKAIVNGAHKEKDLVNILDKFIEMYVLCPHCLLPETDIVVKKGILICKCNACGNIGELNNSHKIATYMIKNPPMISTVGSKKKKGKEKKVEKSSKGKSEKTDKNEDNNRNGVIYSDDEENDDSDDLLDSDKSISNGKKENKKNKKKDTSSSNNNNSNNNNNNSSSSNSKKKKEEENFVLEKECLHFGSPEIKEVIERMKTIFKESTQMNDIQYAEELRVLQVSQCFDSKCRVFICLCSLFEDKISKELLEKNIKYIKKINDTSVTTMDIFLALEYYVNKVAINSLSIYPYILQVLYNNDIFESKDIIKRYDDDGKNENNHNNKSSNS…	565	0	null	no	GO_0006413	GO_0006446	GO_0006413,GO_0006446	0	0	0	0	0	0	0	0	0	0	0	0	0	0	0	0	0	0	0	0	0	0	0	0	0	0	0	0	0	0	0	0	0	0	0	0	0
2037	PF3D7_0828500	translation initiation factor eIF-2B subunit alpha, putative	null	ATGGAATGTTACGATAACACGAAACAGAAGGATTTACAAGAAGAGCACGATGTGGTACGTAATTTCAGAAGATATTATTTTCAGGAAAAAGAAGAAATGCATATAGCAGCCATAAAATCAATATCCGATGTCTTAAAAAATAGCATATCGGAAACGAACTTTGAATTATTTATTAATATGAATGAAGCAAAATGTAAATTAAATAATTTTATTAATAATAATCAAACACAACAAGATATTATATCTGTCCCACATTCCAAAAGAATGACTATATATCCAATAATTTCCTCGTGTGATATATATCATCATTTTGTTGTAAAAAAATACACACACAACGAAAATAACTTCCATGTACTTAAAAATGTTATCGAAAATAACGCGGATGAATTCTCAGCAAGC…	MECYDNTKQKDLQEEHDVVRNFRRYYFQEKEEMHIAAIKSISDVLKNSISETNFELFINMNEAKCKLNNFINNNQTQQDIISVPHSKRMTIYPIISSCDIYHHFVVKKYTHNENNFHVLKNVIENNADEFSASLQKSLETIGSSSNIMFLNKHTTILTHSNSDCVKSLIMDVVKNQNKQVSIYFTCTSQVNLNYEEKEKKFDENFLEELNKENINITKIDLTQVKDIINKIDFVLIGSEIVTDNGGIINKKGIKLISELCLLYKKPFYVTCQAYKFLKIDKNKCSKDFYTFCTQTVTNNFNNIYEFVSPDFITLFYTDIGIFPPSNISYELSKLYINDAFYF	342	0	null	no	GO_0044237	GO_0006446	GO_0044237,GO_0006446	0	0	0	0	0	0	0	0	0	0	0	0	0	0	0	0	0	0	0	0	0	0	0	0	0	0	0	0	0	0	0	0	0	0	0	0	0
2599	PF3D7_1013900	translation initiation factor eIF-2B subunit delta, putative	null	ATGGATGATAAATCCTATTCAACCTTTGCCAAGAGAAAAAAAAAAAGGGTGAATGGAAAAATAAATAAAGAGAAATTTAAAAAGAATATTATAAAGAATGATAAGTATGTAAAAGCATCAACATTAAATAAAAATATTAGTAAGAAAACTTTTTTACATACTTTATTTAAAAGTTTTATTAAACCATATAATGAGAAGAATACAGCATTTTACTCTATTTTATGTATTATAAATAATATTTATAAATGTACTTATTTTAATGAACATCGGTGTTTTATTTGTAAATCTTTATATGAAGACACATCGAAGCAGTTAGAAGAAAAAAAAAATATTTATTATTATTATAGTAGTGATGGGGATGATAATAATTTCCCTTACAATATATATTATAATATAAAA…	MDDKSYSTFAKRKKKRVNGKINKEKFKKNIIKNDKYVKASTLNKNISKKTFLHTLFKSFIKPYNEKNTAFYSILCIINNIYKCTYFNEHRCFICKSLYEDTSKQLEEKKNIYYYYSSDGDDNNFPYNIYYNIKKINLNESNKTSKNSSNSNKIIVTTNKNNAKTLNSCLLNECPHFSDSSNLEYRDEERKKNDGTTEDHNEAKENKENKESKENIKNMTNVENCNKVKMNVTLRHISNNNKSTNINNNNNNNNNNSNNNYSENQLCACPVQNFVNVKLNFCNSNQYHFLSHEKSNFVDIYNFKVFDKINMYDKILLDLNQNEIHPNILRTGIFFNKCSITTHNHRNVDLLIALKSFIKDYTLPPYEPINKHMKVVIDKEINYIIMCKKHSVSMGEVIRW…	1074	0	null	no	GO_0044237	GO_0006446	GO_0044237,GO_0006446	0	0	0	0	0	0	0	0	0	0	0	0	0	0	0	0	0	0	0	0	0	0	0	0	0	0	0	0	0	0	0	0	0	0	0	0	0
3846	PF3D7_1250600	translation initiation factor eIF-2B subunit beta, putative	null	ATGGATTTACATGTAAAAAAGAATAATTATGATCAAGTTTTAAATATAAATAAAAATCAAGGAAATTCGAATTATGACCTGATCGAAATAAAAAATAATACCAACAATAATAATAATAGTAACAATAATAATAATAATAACAAATTAATAGAACATAACCATTTTAATAATATAGACGAACAAACAAAAGAAAAACAAAATGTATTTTATGATAATGATGTGAGGGAAGTAAACACAAATGTAACCTCAAATGTAAAAGAAAATAAACCATCTAAGAATAATACGGATACTAATGTATATTTATCTATTAATAGATGTGTGAATAATGAGTGTTCAAAAAAAGAAGATTATTACAAAGATGTTTATAATAATATATCACATATATTAGACCATGGTTTA…	MDLHVKKNNYDQVLNINKNQGNSNYDLIEIKNNTNNNNNSNNNNNNNKLIEHNHFNNIDEQTKEKQNVFYDNDVREVNTNVTSNVKENKPSKNNTDTNVYLSINRCVNNECSKKEDYYKDVYNNISHILDHGLANKSCVPKGCLELDNKKDVFNKMININSNICNTNNKDIYNKITNEHNYKDLNSLNHINDEEKKSNIPNENILREKSAHCEDEKKSEAWNYKESINYNKNQFEKKKKKSFEEKKERQKELFVAYWLNGIVDLLKRGFKNGNICGSNSVGKKIAEVLKKIVEIYQWKNVFDLIEIIKYLGKQIIKNNKMFFVIPNIIRRVLTIIRVEHFKQLYLYNNNYMDNINMFDDKVCEENRGTQSPNNYCHNNNKNNCIDNNIFYDKNKVKKKN…	679	0	null	no	GO_0044237	GO_0006446	GO_0044237,GO_0006446	0	0	0	0	0	0	0	0	0	0	0	0	0	0	0	0	0	0	0	0	0	0	0	0	0	0	0	0	0	0	0	0	0	0	0	0	0
4296	PF3D7_1342100	aconitate hydratase	IRP	ATGCATTTTCGAAGGTGTATACGAAAATATTGTATAAATAAAAAAATTGTTAACCCCTTTGAACATGTACAGAGAACTTTAAATGAGAAGAACTATTATTATTATGATATTAACGAACTGCATGATAGCAGAATTAAGAGTTTACCATATTCGATAAGGGTTTTACTAGAATCTGCTGTTCGAAATTGTGACAATTTAAAAGTCAGTGAAAAGAATGTAGAAACTATATTAGGATGGAAAGAAAATTGTAAGAAGAAAAAGGAAGTTCCTTTTATGCCTACGAGAGTATTATTACAAGATTTAACGGGTGTCCCATGTATTGTTGATTTAGCTACCATGAGAGACACAGCCGAAAAATTAGGATGTGATGCAGAACGAATTAATCCTTTAATCCCTGTA…	MHFRRCIRKYCINKKIVNPFEHVQRTLNEKNYYYYDINELHDSRIKSLPYSIRVLLESAVRNCDNLKVSEKNVETILGWKENCKKKKEVPFMPTRVLLQDLTGVPCIVDLATMRDTAEKLGCDAERINPLIPVDLVIDHSVQVDYSRREDALELNEKKEYERNLERFKFLKWGMNSFKNMLILPPGSGIVHQINLEYLAHCVFNKDNLLYPDSVVGTDSHTTMINGLGILGWGVGGIEAEATMLGLPISMTLPEVVGINVVGKLSDYLLSTDIVLYITSFLRKEVGVVNKYVEFFGTGLKDLKLADRATISNMAPEYGATVGFFPVDDITLEYLLQTGRDKEKVELIREYLMKNSMFNTYKDNVEYTDVYTLDLSKLNLSLSGPKRPHDNVLLSELHKD…	909	0	null	no	GO_0008152	GO_0006447, GO_0006099	GO_0008152,GO_0006447,GO_0006099	0	0	0	0	0	0	0	0	0	0	0	0	0	0	0	0	0	0	0	0	0	0	0	0	0	0	0	0	0	0	0	0	0	0	0	0	0
572	PF3D7_0322000	peptidyl-prolyl cis-trans isomerase	CYP19A	ATGAGTAAGAGGAGTAAAGTTTTTTTTGATATATCTATTGACAATAGTAATGCTGGAAGAATAATTTTTGAATTATTCAGTGATATAACTCCTAGAACCTGTGAAAACTTTAGAGCTTTATGTACAGGTGAAAAAATAGGATCAAGAGGTAAAAACTTACATTACAAAAATTCAATATTCCATAGAATTATTCCTCAATTTATGTGTCAAGGAGGTGATATTACAAATGGAAATGGATCAGGAGGAGAATCAATATATGGAAGATCTTTTACGGATGAAAATTTTAATATGAAACATGATCAACCAGGATTATTATCTATGGCAAATGCTGGACCAAATACCAACTCATCACAATTCTTTATCACCTTAGTACCTTGCCCATGGTTAGATGGTAAACAT…	MSKRSKVFFDISIDNSNAGRIIFELFSDITPRTCENFRALCTGEKIGSRGKNLHYKNSIFHRIIPQFMCQGGDITNGNGSGGESIYGRSFTDENFNMKHDQPGLLSMANAGPNTNSSQFFITLVPCPWLDGKHVVFGKVIEGMNVVREMEKEGAKSGYVKRSVVITDCGEL	171	0	null	no	GO_0006457, GO_0000413	GO_0006457	GO_0006457,GO_0000413,GO_0006457	0	0	0	0	0	0	0	0	0	0	0	0	0	0	0	0	0	0	0	0	0	0	0	0	0	0	0	0	0	0	0	0	0	0	0	0	0
931	PF3D7_0510200	peptidyl-prolyl cis-trans isomerase	CYP87	ATGAGTAAAAATGATGAATATAAAAATGAAAAAGGAGAAGGAGAAGAATTACCTTCTTCAGATGGTGAGTCAAGCGATGGAAGTTTTGGTCCAGTTCCATTACAACAAAATAAGGACAACATAAATGATGAGAATTATAATGATGAGAATTATAATGATGAGAATTATAATGATAAGAATTATAATGATAATGATTATATTAGTGGTAATGAGAAGGATGTAGTTTTGTTGGATAGTAAAAAAAAAAAAAAAAATTCTGTATCATGCTCATCTTCATCATCCATAAATATACCAGAAAATGAAGAATTATTAAATAAAAAGAAAAGAAAAGTAAAAGGAATAATAGAAGAGAACAAAAAAAATCAAGAAAAGATGAAAAAGAAGAAAATACGAATTAAT…	MSKNDEYKNEKGEGEELPSSDGESSDGSFGPVPLQQNKDNINDENYNDENYNDENYNDKNYNDNDYISGNEKDVVLLDSKKKKKNSVSCSSSSSINIPENEELLNKKKRKVKGIIEENKKNQEKMKKKKIRINNDIYLKNLPTNKNYQVSYMHTDIVTHVVVSNKKKYIITASLNGIIKFWYKNIGCIEFVKHFKIHSDEIINIFISEDEEHLGSLSKDKTYKQFDITSFDMNIVIKLSFIPRTGEFIYSSIFSTEVKVAISSSEKACIYIYKPLESDICIQTIDFGCCNIIEIIKYNKFYDLCVFSDNEGLLDIVDVTNFKFPTSKEEKKSKTNNNMDHKLIDFMNKRYPIKKINFSFKSETDLYELCKYKTYALCISLSLDGEYMAILSENYFLRIY…	747	0	null	no	GO_0006457, GO_0000413	GO_0006457	GO_0006457,GO_0000413,GO_0006457	0	0	0	0	0	0	0	0	0	0	0	0	0	0	0	0	0	0	0	0	0	0	0	0	0	0	0	0	0	0	0	0	0	0	0	0	0
1112	PF3D7_0528700	peptidyl-prolyl cis-trans isomerase	CYP23	ATGTTCACCTTATGCAAAGGTTATAGTGAGGATGAAGACGAAGAAGAAGTAAAAGACATTATTGACAATTTAAAAGAACAGAAGAAATCGTTTGAAGAAAAAATAAATTATTATAAATTAAAAGGGAATATTGAAAGAAGTCATATAACAATATATACAAATTTAGGTGAATTTCAAGTTGAATTATATTGGTATCATAGTCCTAAAACGTGTTTAAATTTTTATACATTATGTACTATGGGTTATTATGATAATACAATATTTCACCGAGTAATTCCGGATTATATTATACAAGGAGGAGATCCAACAGGAACAGGAAAAGGTGGAAAAAGTATTTACGGTGAATATTTCGAAGATGAAATTAATACAGAATTAAAACATACAGGAGCTGGAATCTTA…	MFTLCKGYSEDEDEEEVKDIIDNLKEQKKSFEEKINYYKLKGNIERSHITIYTNLGEFQVELYWYHSPKTCLNFYTLCTMGYYDNTIFHRVIPDYIIQGGDPTGTGKGGKSIYGEYFEDEINTELKHTGAGILSMSNNGPNTNGSQFFITLCPLPHLDGKHTIFARVSKNMTCIENIASVQTTATNKPIFDVKILRTSTAVNVD	204	0	null	no	GO_0006457, GO_0000413	GO_0006457	GO_0006457,GO_0000413,GO_0006457	0	0	0	0	0	0	0	0	0	0	0	0	0	0	0	0	0	0	0	0	0	0	0	0	0	0	0	0	0	0	0	0	0	0	0	0	0
1803	PF3D7_0804800	peptidyl-prolyl cis-trans isomerase	CYP24	ATGAAAAATTTGAATCAGAATATGAAAAATAATGATAATAAAAAGAATGAAAAAATATCAGGGTTAGAAGAGAATGAAGAACATAATAATAACAATATAGTACCATATTATTTATCAAATTTATTAACGAATCCATCTAATCCTGTTGTATTTATGGATATAAATTTAGGTAATCATTTTTTGGGAAAATTCAAATTTGAATTATTTCAAAACATTGTACCCAGAACAAGTGAAAATTTTAGGAAGTTTTGTACAGGTGAACATAAAATAAACAACTTACCAGTAGGATATAAAAATACAACATTTCATAGGGTAATAAAAGATTTTATGATTCAAGGTGGAGATTTTGTTAACTATAATGGTAGTGGATGTATAAGTATATATGGAGAACATTTTGAT…	MKNLNQNMKNNDNKKNEKISGLEENEEHNNNNIVPYYLSNLLTNPSNPVVFMDINLGNHFLGKFKFELFQNIVPRTSENFRKFCTGEHKINNLPVGYKNTTFHRVIKDFMIQGGDFVNYNGSGCISIYGEHFDDENFDIKHDKEGLLSMANTGPNTNGCQFFIITKKCEWLDGKNVVFGRIIDNDSLILLKKIENVSVTPYIYKPKIAINIVECGEL	217	0	null	no	GO_0006457, GO_0000413	GO_0006457	GO_0006457,GO_0000413,GO_0006457	0	0	0	0	0	0	0	0	0	0	0	0	0	0	0	0	0	0	0	0	0	0	0	0	0	0	0	0	0	0	0	0	0	0	0	0	0
3014	PF3D7_1115600	peptidyl-prolyl cis-trans isomerase	CYP19B	ATGAATAAATTAGTGTCAATCATTTTAGTTATATTCTTTTTGTTCCATAAATATGCTTTATGCGCCGAGGAACATGAAATTACTCACAAAACCTATTTTGATATAACTATCGATGACAAGCCACTTGGAAGAATCGTATTTGGTTTATATGGAAAGGTAGCCCCCAAGACAGTAGAAAATTTTGTAAGTATATGTAAAGGGACGGTTGTAGATGGAAAAATGTTACACTATACGAATTCTATTTTTCATCGTATAATACCCAATTTTATGGCTCAAGGAGGAGACATTACTAATTTTAATGGTACTGGTGGTTTAAGTATTTATGGAAAAAAATTTGAAGATGAAAATTTTAAAGTAAATCATAGTAAAAGAGGATTATTATCAATGGCTAATGCAGGA…	MNKLVSIILVIFFLFHKYALCAEEHEITHKTYFDITIDDKPLGRIVFGLYGKVAPKTVENFVSICKGTVVDGKMLHYTNSIFHRIIPNFMAQGGDITNFNGTGGLSIYGKKFEDENFKVNHSKRGLLSMANAGKNTNGSQFFILFIPTPWLDGRHVVFGEVVEGLDKLVHIEAVGTDSGEPLKRVLVKESGELPL	195	0	HMM: MNKLVSIILVIFFLFHKYALCA, NN: MNKLVSIILVIFFLFHKYALCA	yes	GO_0006457, GO_0000413	GO_0006457	GO_0006457,GO_0000413,GO_0006457	0	0	0	0	0	0	0	0	0	0	0	0	0	0	0	0	0	0	0	0	0	0	0	0	0	0	0	0	0	0	0	0	0	0	0	0	0
3022	PF3D7_1116300	peptidyl-prolyl cis-trans isomerase	CYP19C	ATGTCTTTGAGTATACATACAAATTATGGAGATATAAAAATAGAATTATTCTGTTATGAGGTTCCAAAAACGTGTAAAAACTTCTTAGCTTTATGTGCTTCTGGATATTATGATAATACCAAATTTCACAAAAATATAAAAGGATTTGCCATACAAGGCGGAGACCCAACCAATACAGGAAAAGGAGGGCAAAGTATTTATGGGAAATATTTCGAGGACGAATTTGATTCAACATTAAAGCATGACAAAAGAGGTATTGTATCAATGGCAAATAAGGGAAAACCAAATACTAACGGTTCTCAATTTTTTATAACATATTCTAGACAACCACATCTTAATGGTATTTATCCTGTCTTTGGAAAGGTGATTGACGGCATGGATGTTCTATCTGTTCTTGAG…	MSLSIHTNYGDIKIELFCYEVPKTCKNFLALCASGYYDNTKFHKNIKGFAIQGGDPTNTGKGGQSIYGKYFEDEFDSTLKHDKRGIVSMANKGKPNTNGSQFFITYSRQPHLNGIYPVFGKVIDGMDVLSVLENEPVGEKSRPIKDIIIETITIHANPIAEEESVDN	167	0	null	no	GO_0006457, GO_0000413	GO_0006457	GO_0006457,GO_0000413,GO_0006457	0	0	0	0	0	0	0	0	0	0	0	0	0	0	0	0	0	0	0	0	0	0	0	0	0	0	0	0	0	0	0	0	0	0	0	0	0
3381	PF3D7_1202400	peptidyl-prolyl cis-trans isomerase	CYP26	ATGAATATTCCTAATCCTCGTGTATTTTTGGATATAGCCATTGGTGGGAGGAATGCCGGACGAATGATATTTGAGCTTTTTATGGATAAACTTCCCATAACGTGTGAAAATTTTAGATGTCTATGTACTGGAGAAACAGGTTTAGGTTATTATTTAAAACCACGATGGTATAAGAATTCTCCTATCCATAGAATAGTGACCGATTTTATGTTTCAGGGGGGAGATTTTAACTTTGGGAATGGTTATGGTGGGGAATCAATATATGGTCAATATTTTAGAAATGAAAAATTTATTTATAAGCATTCGAAAAGGGGTATATTATCAATGTGTCAAACAAGAATAAAACACACAAATAATTCCCAATTTTTTGTTACTTTTAAAAGTTGCCCTTGGTTAGAT…	MNIPNPRVFLDIAIGGRNAGRMIFELFMDKLPITCENFRCLCTGETGLGYYLKPRWYKNSPIHRIVTDFMFQGGDFNFGNGYGGESIYGQYFRNEKFIYKHSKRGILSMCQTRIKHTNNSQFFVTFKSCPWLDKRHVVLGHLEYGFDTLSFIEEQGTLIGKPKKQVFIYNCGVIPLDKIKYKSADNSDDDYIIPDIEKPLLEKDISINENSDFNELRNMYKYNKHF	226	0	null	no	GO_0006457, GO_0000413	GO_0006457	GO_0006457,GO_0000413,GO_0006457	0	0	0	0	0	0	0	0	0	0	0	0	0	0	0	0	0	0	0	0	0	0	0	0	0	0	0	0	0	0	0	0	0	0	0	0	0
3506	PF3D7_1215200	peptidyl-prolyl cis-trans isomerase	CYP32	ATGCTTTATAAAAGTTTGAAAGCAAGTACAATCATTGGTAGAAAATGTTTTCATTGGTGGAATAATTTGCCCATAACGTGGAAAGTGGGTATTGCCTGTTCGGTACTTTTTCCACCTTTATGGAATTATAATGAAAGAAGAAAAGCAAAAGAAAAACAAATATTTTATAATAAATCTATTAGAGATTATGTATTTTTTGACATTGCAATAGAAAATAAATATGTTGGTAGGGTCTTGATCGGATTATATTCTGATCAAGTACCATTATCAACTGAGAATTTTATACAGCTAGCTGAAGGATATCAAATAAAAGATAAATATATAGGATATCGTAATACATCAATACATAAAATATACCCTGGTATTGGTTTAGTAGGAGGAAATGTTTTAAATGATAAA…	MLYKSLKASTIIGRKCFHWWNNLPITWKVGIACSVLFPPLWNYNERRKAKEKQIFYNKSIRDYVFFDIAIENKYVGRVLIGLYSDQVPLSTENFIQLAEGYQIKDKYIGYRNTSIHKIYPGIGLVGGNVLNDKEGLSIYGKKFPDENFDMEFVQDGDVALFNEGPHSNSSQFIITFSPMPILHKHNVVIGTVLKGMNIIRMIENVGTKLGHPMYNVRIVNCGLYKGLEKDGPPFFNFTEIIEKNKEHLISKKEFEKLSKEQRQSLLNDSNKTEKKKKQAL	280	0	null	no	GO_0006457, GO_0000413	GO_0006457	GO_0006457,GO_0000413,GO_0006457	0	0	0	0	0	0	0	0	0	0	0	0	0	0	0	0	0	0	0	0	0	0	0	0	0	0	0	0	0	0	0	0	0	0	0	0	0
4815	PF3D7_1423200	peptidyl-prolyl cis-trans isomerase	CYP52	ATGTCAGAAGTGTATAGCATCGAACCAAAAACACATGGTAAGGTAATAATTTATACAAGTTTAGGAGAACTAGAGATTCATTTATTTAGTAATGAATGCCCAGAAGCATGTAGAAATTTCATTCAACATTGTTTAAATAATTATTATAACAAGAATGAATTTTTCAGAGTAATTCCTAGATTTTTAATACAAACGGGGGACCACACAAATACAGGATTGCATAATGAGTATGCCTTTAGTAGTCCCTTCAAAAATGAATATAACAGTAGATTAAAATTTTTATACACAGGATGTTTATCTTTTGCAAACCTCAATATTGACAAACCTTCGAATGGAAGTCAATTTTTTATCACATTAGATAAAGCAGAATATTTAAATAATAAGAACACGTTATTTGGA…	MSEVYSIEPKTHGKVIIYTSLGELEIHLFSNECPEACRNFIQHCLNNYYNKNEFFRVIPRFLIQTGDHTNTGLHNEYAFSSPFKNEYNSRLKFLYTGCLSFANLNIDKPSNGSQFFITLDKAEYLNNKNTLFGKVAKHSIYNLLKFNNIKTNKHDKPIEDIPYIEYVKIIENPFHHLVPSINYEYNTKNQNVKDKNEYLNKTKKKKEQNLLSFDYDQEISDDSETFFRGDKDQTVKQKNVSSYDKFGNVEDNKGEDDKGEDDKGEDNKGEDNKGEDNKGEDDKGEDIKGEDIKGEDIKRDEKNNKTTEDKINTLKKRTCDIENSNRKKNKTSSSIKDIINMDEEYLKNMKKYNKMSKKEREKLSLKKLQDFDNRLKDLFSRENNEESTKHNWLNKSGLK…	446	0	null	no	GO_0006457, GO_0000413	GO_0006457	GO_0006457,GO_0000413,GO_0006457	0	0	0	0	0	0	0	0	0	0	0	0	0	0	0	0	0	0	0	0	0	0	0	0	0	0	0	0	0	0	0	0	0	0	0	0	0
3181	PF3D7_1132200	T-complex protein 1 subunit alpha	TCP1	ATGTCTTTGAGTATTTATGGAAATCGAGAAAGCGGCCAAGATGTGAGAACAGCAAATGTTACGGCTGTTCAAGCGATCTCGAATATTTTAAAGTCGAGCCTTGGGCCACAAGGACTTGATAAAATGCTTGTAGATAATATTGGGGATGTGACTATAACAAACGATGGAGCTACAATATTAAAACAATTAGAAGTTCAACACCCTGCTGCGAAGATTTTAGTTAATCTTTCAGAATTACAAGATCAAGAGGTTGGTGATGGTACAACATCTGTTGTGTTATTAGCTTCTGAATTGTTGAGAAGAGGTAATGAATTAATAAAAATGGATATTCATCCGACAACTGTTATTTGTGGTTATAAATTAGCTATGAAAGAATCAGTTAAATATATAAAAGAGAAA…	MSLSIYGNRESGQDVRTANVTAVQAISNILKSSLGPQGLDKMLVDNIGDVTITNDGATILKQLEVQHPAAKILVNLSELQDQEVGDGTTSVVLLASELLRRGNELIKMDIHPTTVICGYKLAMKESVKYIKEKLSERVSNLGKDVIINIAKTTLSSKFISYESDYFAKMVANAIQSVKIINESGKTKYPVSSVNVIKVHGMSSLDSKLIEGYAIMSGRASQAMPTVIKNAKIAFLDFPLKQYRLHLGVQVNINDPKELEKIRQKEKDITKERVNKILESGANVILTTQGIDDMPLKYFVEAGAIAVRRVNKDDLRRIAKLTNGQIRLTLSSIDGTEKFEASSLGYCDEVYEDKVGDWDLMFFKGCRTSKSNTILLRGANDFVLDEMQRSIHDALCSVSR…	544	0	null	no	GO_0044267	GO_0006457	GO_0044267,GO_0006457	0	0	0	0	0	0	0	0	0	0	0	0	0	0	0	0	0	0	0	0	0	0	0	0	0	0	0	0	0	0	0	0	0	0	0	0	0
273	PF3D7_0214000	T-complex protein 1 subunit theta	CCT8	ATGTTTTCCAACAAATTAGGTGTGAACTCCATTTTGAAGGATGGTTATCGTATTATGAAAAATAATGAGGACACCATTTTGAAGAACATAGAAGCATGTAAAGAGATATGTAACATACTTCAAACATCTCTAGGACCAAAATGTATGAATAAGTTAATTATTAATCATATACATAAGAAGATTGTTTCGAGTGATTGTATTACTATATTAAATGATATGGAAATAAATCATCCTGTTGTTAATATATTAAAGAAATTATCTGAAACGATTAATTATGAGTATGGTGACTTTACGAATTATGCATTTACCATAACATGTGAGATCTTAGATAAGGCAAGTTTTTTAATACAGCAAGGTTTTAATATTAATGATATATTGAATGGTTTTGTTTTAGGATAT…	MFSNKLGVNSILKDGYRIMKNNEDTILKNIEACKEICNILQTSLGPKCMNKLIINHIHKKIVSSDCITILNDMEINHPVVNILKKLSETINYEYGDFTNYAFTITCEILDKASFLIQQGFNINDILNGFVLGYKEIEKVLEEMIVWKVPNFYEEKELIKVLKSVMLTKNISNNYNFLIQLLAKCISTLMPEKIEDFDVDNIRVSKLNGGNIIDSEFLMGMVIAREANGIIKKKENANVIVLNCGLEGPTTETKGTVLLHNAEELINYTKGEELQMKKYIDNFKKANVDVIIVNGAISDIAQHFCDTNNIMTLKITSKFETLRICKLLNISSLIKLSTPQPEDIGKVSSIYVSEIASKKVTIINSKNKKVGTIILRGATFNLLDEVERCIHDGINSIKNA…	542	0	null	no	GO_0044267, GO_0006457	GO_0006457	GO_0044267,GO_0006457,GO_0006457	0	0	0	0	0	0	0	0	0	0	0	0	0	0	0	0	0	0	0	0	0	0	0	0	0	0	0	0	0	0	0	0	0	0	0	0	0
421	PF3D7_0306800	T-complex protein 1 subunit beta	CCT2	ATGATGAATTCTGTTATGCCTGATGTTTTAAAAGAAGGGGCCCAAGAAGATAAGGGGGAAATTGCGAGACTACAATATTTTGTAGGTGCTATCGCAGTAGGTGATTTAGTTAAAAGTACATTAGGTCCAAGAGGTTTAGATAAAATTTTGACACCTTTAAACATTGAAGGAACTAGGTCCCATCAACATACTGTTACAAATGATGGAGCAACGATATTAAAATCTGTGTGGTTAGATAATCCTGTTTCAAAAATATTAGTAGATGTGAGTATGCAACAAGATAATAAATGTGGTGATGGTACTACAGGTGTTGTTGTATTGGCTGCTGAAATGTTAAGAAATGCTGAAATATTAGTAGAGAATAAGATTCATCCTCAAATAATATGTGATGGATTTCGT…	MMNSVMPDVLKEGAQEDKGEIARLQYFVGAIAVGDLVKSTLGPRGLDKILTPLNIEGTRSHQHTVTNDGATILKSVWLDNPVSKILVDVSMQQDNKCGDGTTGVVVLAAEMLRNAEILVENKIHPQIICDGFRMALASAREALLDSCFCHDVDSELFKEDMLKIARTTLSSKLLTHEKEHFAELAVNAILRIKDNLNLDLIQIIKKTGGTIKDSYLEEGFILEKRIGINQPKSLSNCKIMVANTPMDTDKIKIYGTKVNVHSFEDVQDLENEERLKMKNKVENIISHGCNVFINRQLIYNYPEQIFRENNVMTIEHSDFDGMERLANCLDAEIASTFEKDLNIKLGYCDKIEEIIIGEDKLVRFSGCKKNGACTIILRGASTHILEESERSLHDALAVL…	533	0	null	no	GO_0044267, GO_0006457	GO_0006457	GO_0044267,GO_0006457,GO_0006457	0	0	0	0	0	0	0	0	0	0	0	0	0	0	0	0	0	0	0	0	0	0	0	0	0	0	0	0	0	0	0	0	0	0	0	0	0
434	PF3D7_0308200	T-complex protein 1 subunit eta	CCT7	ATGAGTCACTTAATGTCCTTACCGATTGTTCTTTTGAAGGAAGGGACGGATACCGCTCAGGGTAGAAGCCAAATAATTAGGAATATCAATGCTTGTCAGATTATCGTAGATATAGTAAAGACAACTTTAGGTCCTCGAGGTATGGATAAATTAATTTATACAGAAAGAGATGTTACGATAACAAATGATGGTGCTACCGTAATGAATTTATTAAATATTAGTCACCCAGCTGCTTCGATATTAGTTGATATAGCAAAATCTCAAGATGACGAAGTTGGTGATGGTACTACTTCTGTTGTTGTTGTGGCAGGTGAATTATTGAATGAAGCAAAGGGTTTGTTAAATGATGGTATTGAACCGAATATGATTATAGATGGATTTCGTAACGCTTGTAATGTT…	MSHLMSLPIVLLKEGTDTAQGRSQIIRNINACQIIVDIVKTTLGPRGMDKLIYTERDVTITNDGATVMNLLNISHPAASILVDIAKSQDDEVGDGTTSVVVVAGELLNEAKGLLNDGIEPNMIIDGFRNACNVAINKLNELSLNFSNKNEEEKRSILLKCAQTALNSKLVSNHKEFFGELVVNAVYKLGDNLDKSNIGIKKVTGGSCLDTQLIYGVAFKKTFSYAGFEQQPKKFINPKILLLNVELELKAEKENAEVRIENPNEYNSIVQAEWDIIFKKLNLIKDCGANIVLSKLPIGDIATQFFADHDIFCAGRVEDADLKRTANATGALVQTSLFNLNDDVLGTCGVFEEVQIGNERYNIFKECLKTKSVTIILRGGAKQFIEEVERSINDAIMIVL…	539	0	null	no	GO_0044267, GO_0006457	GO_0006457	GO_0044267,GO_0006457,GO_0006457	0	0	0	0	0	0	0	0	0	0	0	0	0	0	0	0	0	0	0	0	0	0	0	0	0	0	0	0	0	0	0	0	0	0	0	0	0
555	PF3D7_0320300	T-complex protein 1 subunit epsilon	CCT5	ATGAATATTGCTATTGATGAGTATGGTCAACCCTTTGTTATATTAAGGGAAGAAGAAAAGAAACGAATTAAGGGGATTGAGGCACATAAGAGTAACATATTAGCAGCTAAGGTAGTAGCTGATATATTGAAAAGTTCAATAGGTCCAAGAGGTATGGATAAAATAATAGTAAGTGAAGATAATAATGTAACTGTTACAAATGACGGAGCAACAATTTTGGAGAAAATTGATGTACAACATGAATGTGCTAAATTATTAGTAGAATTATCAAAAAGTCAAGATAATGAAATTGGAGATGGTACTACAGGAGTAGTTATTATAGCAGGTGTATTATTAGAAGAAGCTTATGCTTTAATTGATAAAGGAATACATCCTTTAAGAATAGCTGATGGATTTGAG…	MNIAIDEYGQPFVILREEEKKRIKGIEAHKSNILAAKVVADILKSSIGPRGMDKIIVSEDNNVTVTNDGATILEKIDVQHECAKLLVELSKSQDNEIGDGTTGVVIIAGVLLEEAYALIDKGIHPLRIADGFENACNIALKVIEDIALTVDIEENDHKILKKVAKTSLSSKIVSSKKDLLSNIVVDAVLSVADMKRKDVRFDLIKIEGKTGGLLEESTLIKGIVLNKELSHSQMIKEVRNAKIAILTCPFEPPKPKIKHKLNITNVDAYRDLQAIEKKYFYDMVASLKKAGANFVICQWGFDDEANYLLLKENIPAIRWVGGVEMELIAIATGGKIIPRFEDIDESKLGKADLIREISHGTVNNPMVYIEGCSNTKAITILLRGGNQMMIEECERSVHD…	535	0	null	no	GO_0044267, GO_0006457	GO_0006457	GO_0044267,GO_0006457,GO_0006457	0	0	0	0	0	0	0	0	0	0	0	0	0	0	0	0	0	0	0	0	0	0	0	0	0	0	0	0	0	0	0	0	0	0	0	0	0
1229	PF3D7_0608700	T-complex protein 1 subunit zeta	CCT6	ATGTCCATACACCTGTTGAACAAGAAGGCGGATAGCTTGCGTTCCACAAATGTGCTCATGACGAATATGAACGCAAGCAAAGGGATGTATGAAATAATAAAAAGTAATTTAGGACCTAAAGGAAGTTATAAAATGTTAGTTAGTAGTTCAGGTGCTATAAAGATAACAAAAGATGGTAATGTTTTATTAAATGAAATGATGATTCAACATCCTACAGCAAGTATGTTAAGTAGAATTTGCTCAAGCATTGATGAAACTTTAGGAGACGGTTCTAGTAGTAACTTAATAGTTGCAACTTCTTTAATATATTTATCGGAGAAATATATTTTGTATGAAAATATTCATCCACGTATTATAACACAAGGATTTGATATCGCTAAAGGTATATTATTAGAATTC…	MSIHLLNKKADSLRSTNVLMTNMNASKGMYEIIKSNLGPKGSYKMLVSSSGAIKITKDGNVLLNEMMIQHPTASMLSRICSSIDETLGDGSSSNLIVATSLIYLSEKYILYENIHPRIITQGFDIAKGILLEFLDSMKIPVNIEENFDKELLYNVCKTCIRTKLPICLADKLADDLVESIKIIYKPTKQIDLHMIEIMDIKRNMSINTKLVRGMVLDHGCRHPNMPNKLTKCFILVLNVSLEYEKSEVFSSFVYSNAEDRDKLVESERKFTDDKVKKIIELKKILVEKKFKETNEIYNFAVFNQKGIDPISLDLLAKENIMALRRIKRRNLERIVLCCGGNPCNNVYDLTEEDVGYAGLVYEISINDEKYTFIEEVQNPKSCTIFIQAPNDYTIKQIKD…	543	0	null	no	GO_0044267, GO_0006457	GO_0006457	GO_0044267,GO_0006457,GO_0006457	0	0	0	0	0	0	0	0	0	0	0	0	0	0	0	0	0	0	0	0	0	0	0	0	0	0	0	0	0	0	0	0	0	0	0	0	0
3642	PF3D7_1229500	T-complex protein 1 subunit gamma	CCT3	ATGTTAAAAAATCCAGGTACAGTGTTGGTTTTTAAGCCTAATACAAAAAGGGAGGAAGGAAGAAAAACACAGTTATCAAATATACAGGCGAGCCGAGCCGTGAGCGATATCGTTAAAACGACCTTGGGTCCTATGGCAATGTTGAAAATGATGTTGGATCCTCTTGGAGGTATTGTAATTACAAATGATGGGAATTGTATATTAAGAGAAGTAGATGTTGCTCATCCAGCTGCTAAATCTTTGATTGAATTAAGCAGATCACAAGATGAAGAAGTTGGTGACGGTACAACATCTGTTGTTATTTTATCAGGGGAGTTATTAAGTGTTGCTGAAACGTTTTTGAGGCAGAATATTCACCCTACGATAATTGTAAATTGTTATATGAACGCTTTGGATAGT…	MLKNPGTVLVFKPNTKREEGRKTQLSNIQASRAVSDIVKTTLGPMAMLKMMLDPLGGIVITNDGNCILREVDVAHPAAKSLIELSRSQDEEVGDGTTSVVILSGELLSVAETFLRQNIHPTIIVNCYMNALDSSLKFLEEISIDIDVNSESDLLKAIDSCLSTKFVNRYNKIVSKLALEATRCVKMDNLMGRKEIDIKRYAKVEKIPGGDITDSYVLKGVMINKDITHPKMRRYIKNPRILLLDCTLEYKKAESQTNVEILDEKTWNELLLQEEIEVKKMCEYIIDSKCDIVITEKGVSDLAQHFLVKKNISVIRRVRKTDLNRLERISGATIVNRCEEIVEGDIGTKCGLFEIKKIGDDYYSFFVECKDPHACTILLRGSTKDVLNEIERNLHDGMNV…	542	0	null	no	GO_0044267, GO_0006457	GO_0006457	GO_0044267,GO_0006457,GO_0006457	0	0	0	0	0	0	0	0	0	0	0	0	0	0	0	0	0	0	0	0	0	0	0	0	0	0	0	0	0	0	0	0	0	0	0	0	0
4450	PF3D7_1357800	T-complex protein 1 subunit delta	CCT4	ATGGCAGAAGTAGCAAAGAATAAAAACACAGAAAAATTAAATAGAAATGAAAAGCAAAACGATGTGAGGCTAACAAATATATTAGCAGCAAAGGCCGTTGCCGATGTCACAAGAACGAGCTTAGGGCCTAAGGGGATGGATAAGATGATTGAAGATGGTAAAGGGGGAGTTATTATAACTAATGATGGAGCTACAATTTTAAAAGAAATGGCTGTAGCCCACCCAACAGCGAAAATGATTGTTGAGCTGAGTAAAGCTCAAGATGTAGAGGCAGGTGACGGCACTACATCCGTTGTAGTAATGTGTGGTTCGTTTTTAAATGTATGCAAATCATTATTAGATAAAAATATACATTGTCAGAAAATATCTGAAAGTTTTTTTGAAGCCTCATTAAAAAGT…	MAEVAKNKNTEKLNRNEKQNDVRLTNILAAKAVADVTRTSLGPKGMDKMIEDGKGGVIITNDGATILKEMAVAHPTAKMIVELSKAQDVEAGDGTTSVVVMCGSFLNVCKSLLDKNIHCQKISESFFEASLKSEEILREMSIPIDLNDKNMLIQNAITSLNSKVVSYNSSLLAPIAVDVILKITDINKDTNVDLNNVRIVKKLGGTIEDTEIVDGLIFTGNKISKKAQGLKNLTQAKIGLIQFCLSLPKTDMDNTVVVKDYNSMDRLLREERLIIGKMIKKIASTGCNLLIIQKSILRDAVNDLALDFLAKAKIMVIKDIDREDIEFISKTCNCIPVASLDYFTSDKLGYAENVTTESVGYGEIVKITGVESKNTISVLLRASNNLMLDEAERSLHDAL…	529	0	null	no	GO_0044267, GO_0006457	GO_0006457	GO_0044267,GO_0006457,GO_0006457	0	0	0	0	0	0	0	0	0	0	0	0	0	0	0	0	0	0	0	0	0	0	0	0	0	0	0	0	0	0	0	0	0	0	0	0	0
3668	PF3D7_1232100	60 kDa chaperonin	CPN60	ATGAGAATGAAAAGAATTCATATTTTGTTGCTTGTAATATTTTTGTTATGTTTGCGGTATGGATATAGTATTAAGAAGAAGCGCAGTCCTAATAACAAGAATAGGCTTTTTATAAATAAGAGATTGAAATATATAAATAGTAAGATAATAAGTAGAAGAAAAGAAAATTATGTAAAGATGAAAATGACAGAGAATAAAGTGAAGGGTAAAGACATAATATATGGAAATGAGTGTCGAAATGAATTATTAAAAGGAATATTAACAGTATCAGATGTTGTGAAATTAACATTAGGTCCAAGAGGGAGAAATGTATTATTAGAAAAAGAATATGGAAGTCCATTAATAATAAATGATGGAGTAACAATAGCAAAAAATATATCTTTAAAAGATCGAAAGAAA…	MRMKRIHILLLVIFLLCLRYGYSIKKKRSPNNKNRLFINKRLKYINSKIISRRKENYVKMKMTENKVKGKDIIYGNECRNELLKGILTVSDVVKLTLGPRGRNVLLEKEYGSPLIINDGVTIAKNISLKDRKKNNGVKLMQESTNISNDKAGDGTSSTALMTATITKKGIEQVNRNHNPIPIQRGIQLASKMIIEKIKSLSTPIKTYKDILNIATIASNNDVHMGQIIANAYDKLGKNAAIILDDNADINDKLEFTEGYNFDRGIINPYLLYNENKDYIEYSNVSTLITDQNIDNIQSILPILEIFAKNKQPLCIIADDFSNEVLQTLIINKLKGAIKVVPIRAPSFGDRRKDYLKDLCIVTNSKYISADVGLDLNNLHNNMSSFDNNYLSLLGSANTL…	718	1	HMM: MRMKRIHILLLVIFLLCLRYGYSI, NN: MRMKRIHILLLVIFLLCLRYGYSI	yes	GO_0044267, GO_0042026	GO_0006457	GO_0044267,GO_0042026,GO_0006457	0	0	0	0	0	0	0	0	0	0	0	0	0	0	0	0	0	0	0	0	0	0	0	0	0	0	0	0	0	0	0	0	0	0	0	0	0
2031	PF3D7_0827900	protein disulfide isomerase	PDI8	ATGAACAGAAAGTATTTTTCTTCCCTTTTTTTATTTCTTATTTCTTTTGTGTTCGAATCATTTGTTCGTTCGCATGGTGACCTTTTTAATCATTTTGTAACTGATATACATGATGGGGAACTTGATAAATTCATAACAAAGAATGATATAGTTTTGGTTATGTTTTACGCTCCATGGTGCGGTCATTGTAAAAGGCTAATCCCAGAATATAATGAAGCTGCAAATATGTTGAATGAGAAAAAGAGCGAAATAAAATTAGTAAGTATTGATGCTACTTCAGAAAATGCTCTTGCTCAAGAATATGGAATAACAGGATATCCAACTTTGATTTTATTTAATAAAAAGAACAAAATAAATTATGGAGGCGGGAGAACAGCTCAATCTATTGTTGATTGGTTA…	MNRKYFSSLFLFLISFVFESFVRSHGDLFNHFVTDIHDGELDKFITKNDIVLVMFYAPWCGHCKRLIPEYNEAANMLNEKKSEIKLVSIDATSENALAQEYGITGYPTLILFNKKNKINYGGGRTAQSIVDWLLQMTGPVFSHVEGNIEDVLKEKKINVAFYLEYTSEDNDLYKKFNEVGDKNREIAKYFVKKNDKHNKLFCFRTDEKKVEYDEKTPLEEFVTSESFPLFGEINTENYRFYAESPKELVWVCATYEQYNEIKEHVRLAAQELRKKTHFVLLNIPEYAEHAKASLGLTEFPGLAFQSNEGRYLLKNPKESLLNHNAIINFFKDVEAGKIEKSLKSEPIPEDDKNAPVKIVVGNSFVDVVLKSGKDVLIEIYAPWCGHCKKLEPVYEDLGR…	483	1	HMM: MNRKYFSSLFLFLISFVFESFVRSHGD, NN: MNRKYFSSLFLFLISFVFESFVRSH	yes	GO_0045454	GO_0006457	GO_0045454,GO_0006457	0	0	0	0	0	0	0	0	0	0	0	0	0	0	0	0	0	0	0	0	0	0	0	0	0	0	0	0	0	0	0	0	0	0	0	0	0
5299	PF3D7_1472600	protein disulfide-isomerase	PDI-14	ATGCATATTGATAAGTTGCTGATTGTTTTTATTTTTTTAATAAAGTTATGTGTGTGCCATACAGAAAAAGGAGTTAAGAAGGAAATCGTTTCTATAAATATTGATGAATTTAATAATATTTTAAAAGACGAAGGAAACTATACACTTTTAATAGTGTACACACACTGGTCATACAATTCAAATTTATTATTAGAAAACCTAGACAAACTATCCAAACTTTTATTGTATGAAGAGAATATAAAGTTATGTAAAATAAATGCAGCAGCAAATACATTTATTATAGATAAGTTAGATGTGTATAGTTATCCATCTTTATTTATGATTCGAAATAAAGAAATATATAGATATAATGGTGTGAATAATATTAGAGGATTATTATTATGGATATATCAATACTTA…	MHIDKLLIVFIFLIKLCVCHTEKGVKKEIVSINIDEFNNILKDEGNYTLLIVYTHWSYNSNLLLENLDKLSKLLLYEENIKLCKINAAANTFIIDKLDVYSYPSLFMIRNKEIYRYNGVNNIRGLLLWIYQYLDFKIYEINNIERLDVFIDLNEYNNTILFFIFKDLGTANNNINNISRINDLINICLLTNKTLCYYIKENNVIDYFEKNIIQDKYHYNLKNINQDSYYAILFKNDEFDDYFFPLNKKELDMLSNNEYTNEEKIDHLYNWINEREQPLVIQFSEHFFSMLFSNDAVTLFIIYNNINNINKDDIIKCAKKYNHKIKFAISGTTQIFEKRLLNELLIEDNIKKPLMRITEFKNYIRFPYKYKPQSDDQEINEKTIDDFINGYLQEKKYFYR…	553	0	HMM: MHIDKLLIVFIFLIKLCVCH, NN: MHIDKLLIVFIFLIKLCVCH	yes	GO_0045454	GO_0006457	GO_0045454,GO_0006457	0	0	0	0	0	0	0	0	0	0	0	0	0	0	0	0	0	0	0	0	0	0	0	0	0	0	0	0	0	0	0	0	0	0	0	0	0
3100	PF3D7_1124000	endoplasmic reticulum oxidoreductin, putative	ERO1	ATGAAAATTTGCTTAATACCAGTATTTTTATCCTTAATAATATATGTTATTTTATTTTTAAAAGGGAAGAAAATAGGTGATTTATATATTACTGAGCATTTAAGAAATAAGTTTGAAAATATTTTATTGTATTTTAATATTTTTGAAGTACAATACCCTGAAAGTTATTTAAATAATGAAAAATTATTAGGATTACATGTAAGGGATATTGAAAAAGATGCATACAGAGCATATCCTATATTAAAAGAATTAAAACAAAAAGATTATTTTAGAATATTCAAAGTTAATTTACATTTATCATGTAAAGTATTTTTAAAAGGTAATGAAAAATGTAAAGAAATAAAAAAATGTAGTGTTTGTGAATGTGAACAAGATGAAATACCATATAATTTTAGAACT…	MKICLIPVFLSLIIYVILFLKGKKIGDLYITEHLRNKFENILLYFNIFEVQYPESYLNNEKLLGLHVRDIEKDAYRAYPILKELKQKDYFRIFKVNLHLSCKVFLKGNEKCKEIKKCSVCECEQDEIPYNFRTNEIEIIENKMTNEDLKKTFIESKLYKDILGIYAPSNEGFISYVDLVYNSPSFTAYEGRNIWNMIYKENCFQNEKSECEEMNSFYKIISGMQSNIAVLSSEYFYLKNDFLFGEIQINNKFNNDYFKNLNYDYSVTFFKEKIGLYPERIENLYFTFAILLRSMCRLKSLFKQCKCNSGYEQNDKEAVRLLDDLLENFYHSCSSKEFLEPLFPQHGKDILSKFMNITNILDCVPCVKCRLHGKLKTTALQIALVEGVSDEHIGSLERNE…	465	2	HMM: MKICLIPVFLSLIIYVILFLKGK, NN: MKICLIPVFLSLIIYVILFLKGK	yes	GO_0055114	GO_0006457	GO_0055114,GO_0006457	0	0	0	0	0	0	0	0	0	0	0	0	0	0	0	0	0	0	0	0	0	0	0	0	0	0	0	0	0	0	0	0	0	0	0	0	0
2618	PF3D7_1015600	heat shock protein 60	HSP60	ATGATATCAACATTACGAGGGAAAATTTTTAATAACGGCAGTAATAGAAACAAGTGTGTTTCAATTTTAAGTAATATTCAGAAGAGAAACATATCAAAAGATATAAGATTTGGAAGTGATGCAAGGACTGCTATGCTTACAGGTTGCAATAAGTTGGCCGACGCGGTTAGTGTAACGCTTGGTCCAAAAGGAAGAAATGTTATCATAGAACAGTCATTTGGTTCACCCAAAATAACAAAGGATGGTGTAACAGTTGCTAAGAGCATTGAATTTAACAACAAGCTAGCTAATCTTGGTGCACAAATGGTAAAACAAGTTGCTGCAAATACCAATGATAAAGCAGGTGATGGTACAACAACAGCTACAATTTTAGCTAGATCAATATTTCAACAGGGTTGT…	MISTLRGKIFNNGSNRNKCVSILSNIQKRNISKDIRFGSDARTAMLTGCNKLADAVSVTLGPKGRNVIIEQSFGSPKITKDGVTVAKSIEFNNKLANLGAQMVKQVAANTNDKAGDGTTTATILARSIFQQGCKAVDSGMNPMDLLRGINKGVEKVLEYLNSIKKDVTTTEEIFNVASISANGDKNIGQLIADTMKKVGKEGTITVTEGKTLQHELEIVEGIKFDRGYISPYFINNSKDQKVELDKPYILIHEKKISTVKSLLPVLEHVLQNQSSLLVIAEDVDSDALATLIVNKLRLGLKICAVKAPGFGEHRKALIHDIAVMTGAKVITEETGLKLDDPQVVSYLGKAKSINVTKDSTLIMEGEGKKEEINERCESIRNAIKMNTSDYEKEKLQERL…	580	0	null	no	GO_0044267, GO_0042026	GO_0006457, GO_0006626, GO_0006986	GO_0044267,GO_0042026,GO_0006457,GO_0006626,GO_0006986	0	0	0	0	0	0	0	0	0	0	0	0	0	0	0	0	0	0	0	0	0	0	0	0	0	0	0	0	0	0	0	0	0	0	0	0	0
2951	PF3D7_1108700	heat shock protein J2	Pfj2	ATGAATGTTACAAATGTAGTAAAAAGACGAAAGAAGTTATCTTATTTTCATTCACTTCTTCTGATAATATTTTCTTTTTTTCTATCATGTGCTAGAGGCATGGATTATTACAAAAGACTGGGCGTTAAACGGAACGCCACAAAAGAAGATATTTCAAAAGCTTATAGGCAGCTAGCTAAAGAATATCATCCAGATATAGCGCCCGACAAAGAAAAAGATTTTATAGAAATTGCAAACGCCTATGAAACGTTATCAGATCCTGAGAAAAGAAAAATGTATGATATGTATGGTGAGGACTATGCCCAAGGAGGTATGGGAGGAGGAAGTCCCGGGAGAGGGGAACATGCACATGGTTTTCATTTTGATCAAGATGTAGTAAATGAAATATTTAAACAATTT…	MNVTNVVKRRKKLSYFHSLLLIIFSFFLSCARGMDYYKRLGVKRNATKEDISKAYRQLAKEYHPDIAPDKEKDFIEIANAYETLSDPEKRKMYDMYGEDYAQGGMGGGSPGRGEHAHGFHFDQDVVNEIFKQFAGGGGAGASGGRAGNFHFKFTSGGPSFNHFEDEYEDIYKNEVLKINSKNIESVLNDISFSLIINFYSPTCSHCISFKKKYLKLRKKFDGYITFAVVNCQEENMLCRKYNVKSLPQLILMRSDKTYETFYGNRTDENLTYFIKNNIPSAIIECNNQKKLDNFLTQNIEIPKVLFFISHNDNIVMLKALSLEFKKRINIGIIYNTNYSVMKLFKKKNIKTPSLLLVDDIDSLSGDLTQLKNFDFNILSLKLSHIVAQNRLKNNLYGHV…	540	1	HMM: MNVTNVVKRRKKLSYFHSLLLIIFSFFLSCARGM, NN: MNVTNVVKRRKKLSYFHSLLLIIFSFFLSCARGM	yes	GO_0045454	GO_0006457, GO_0009408	GO_0045454,GO_0006457,GO_0009408	0	0	0	0	0	0	0	0	0	0	0	0	0	0	0	0	0	0	0	0	0	0	0	0	0	0	0	0	0	0	0	0	0	0	0	0	0
1627	PF3D7_0718500	prefoldin subunit 3, putative	null	ATGTCATTTGACGATTTAACTGATAATACCAAATCTGTAAGGAACATTCCAGGAGCGAAATTTATAGAACATGTCACAGAATTTTTACAAAATAAAAATGAGGAAAGTATACTCCGCCTAGCAAGAGAACTTTTATTGAAATATAAATTTATGGAACATGCCTTTGTAAGTAGACAAATTAACACTCAAAAAAAAATTCCAGAATTAAAAGATGCCTTAAGAGTTGTGCAATTACTTGAAAAAAGAAAGAAAATAAAAGAAAAAAAAAATTTAGAAACGTTTTTCCCCGTGGAAGAATCTTTGTATGCTAGGGGAATCGTCCAAAAAACTGACAAAATATTGTTATGGCTAGGGGCTAACGTAATGGTTGAGTTTCCCTTTGATGAAGCTACAGATCTT…	MSFDDLTDNTKSVRNIPGAKFIEHVTEFLQNKNEESILRLARELLLKYKFMEHAFVSRQINTQKKIPELKDALRVVQLLEKRKKIKEKKNLETFFPVEESLYARGIVQKTDKILLWLGANVMVEFPFDEATDLLNQHLERAINLSQEMDNELLWLHEQITTTEINISRIHNYIELKKGMMGKEVDKKTEQVN	192	0	null	no	GO_0006457	GO_0006458	GO_0006457,GO_0006458	0	0	0	0	0	0	0	0	0	0	0	0	0	0	0	0	0	0	0	0	0	0	0	0	0	0	0	0	0	0	0	0	0	0	0	0	0
85	PF3D7_0109400	tubulin-specific chaperone a, putative	null	ATGGAATATATGGCATTGGAATTAAAACTTTTGAAAATTAATCATGGAGCTGTGAGGAGACTCTTGAAGGAATTAATATTCTACGAAGAGGAAGAAAAGGAATTAAGAAGTAAATTGAACACCCTTAAGGATGAGAATAAGGGTGAAAACGAAATAAAGAGGGCAAAAGATATTTTAGAAGAAACTGTAAAAGTAGTACCACATATAAATAGTTCTTTACAAAAAAGCTTGAAAAAGTTATATGAAACAGTTTATGAAAAATTTCCAGACATCCTGGAAATCAATGACAAAAAAGTTGGCATTTCAAAAAAATGTACAGAAGAAGAATTAAAAGAATTATTTAAAACAAACTATGAAGAATTTCGTAATGAAATTAATATTATTAATCAAACATTAGAA…	MEYMALELKLLKINHGAVRRLLKELIFYEEEEKELRSKLNTLKDENKGENEIKRAKDILEETVKVVPHINSSLQKSLKKLYETVYEKFPDILEINDKKVGISKKCTEEELKELFKTNYEEFRNEINIINQTLENVFLHIKDATLPSSKKSVISEPVLYQMEECIDI	166	0	null	no	GO_0007023, GO_0007021	GO_0006461, GO_0006457, GO_0007021	GO_0007023,GO_0007021,GO_0006461,GO_0006457,GO_0007021	0	0	0	0	0	0	0	0	0	0	0	0	0	0	0	0	0	0	0	0	0	0	0	0	0	0	0	0	0	0	0	0	0	0	0	0	0
4529	PF3D7_1365900	ubiquitin-60S ribosomal protein L40	null	ATGCAAATTTTTGTAAAAACATTAACTGGAAAAACAATTACCCTTGATGTTGAGCCATCTGATACGATTGAGAATGTTAAGGCAAAAATTCAAGATAAAGAAGGAATTCCTCCTGATCAACAAAGATTAATATTTGCTGGAAAACAATTAGAAGATGGAAGGACCTTATCAGATTATAATATTCAAAAGGAATCAACTTTACACTTGGTTTTAAGATTAAGAGGAGGAGCCATAGAACCATCCTTAGCACAACTAGCTCAAAAATACAATTGCCAAAAATTAATTTGTAGAAAATGTTATGCTAGATTACACCCAAGAGCTACCAACTGCAGAAATAAAAAATGTGGAAGAACCAATCAACTAAGACCAAAGAAAAAACTCAAATGA	MQIFVKTLTGKTITLDVEPSDTIENVKAKIQDKEGIPPDQQRLIFAGKQLEDGRTLSDYNIQKESTLHLVLRLRGGAIEPSLAQLAQKYNCQKLICRKCYARLHPRATNCRNKKCGRTNQLRPKKKLK	128	0	null	no	GO_0006412	GO_0006464, GO_0006412, GO_0006511	GO_0006412,GO_0006464,GO_0006412,GO_0006511	0	0	0	0	0	0	0	0	0	0	0	0	0	0	0	0	0	0	0	0	0	0	0	0	0	0	0	0	0	0	0	0	0	0	0	0	0
4920	PF3D7_1434600	methionine aminopeptidase 2	METAP2	ATGAATAAGAACAACAATAAAGGTAGTGTTAAAAAAAACAATAATTCCAAGAAAAAAACAAGCACAAATATAAACAATGTGAACAATTTAAGTAGTATAAAAAATATAAAGAATGAACAGAATGTGAAAAACGGAGATGTAAATGATGAAATTGCTACTACTACTAGTAGTAACCATGTTAATATGGTGTTGAATGGAAATGATGAAGGGATAAAAGATGTTAAAGTTGTTAATAATTTAAATATTGATAACAAAAGAGAAGATAATAATGTTAGAATAAATGTACAAGGAGAAGAAACTCTTAATAATGATAGTAAAAATAAAGAGGCTGAAAATAAAAGCAATATAAAGAATAATAAATCGAACCAGTCCAACCAATCGAACAAGAAGACGAAGAAC…	MNKNNNKGSVKKNNNSKKKTSTNINNVNNLSSIKNIKNEQNVKNGDVNDEIATTTSSNHVNMVLNGNDEGIKDVKVVNNLNIDNKREDNNVRINVQGEETLNNDSKNKEAENKSNIKNNKSNQSNQSNKKTKNNNNNKNNNNNNNNNNNNNNNNNKNSTSNKKNSKNKKKVDKLDLILNEFKNDIKNEKGENNQNDNKLLNGAIETNNNNNNNNNNSGNNRIHFDKEEIKEIKKKIILKEHVLEEQDNSSIRLLKNWPQLEKTYQTNPPCIPIDMIYGKDGKYPVGEILEYNNYNLSGQSLVEKKEREKLSIDYYEDLRKAAECHRQVRKHMQAFIKPGKKMIDIAQETERKTKELILAEKLKCGWGFPTGCSLNHCAAHYTPNYGDETVLKYDDVCKL…	628	0	null	no	GO_0006508	GO_0006464, GO_0006417, GO_0006412	GO_0006508,GO_0006464,GO_0006417,GO_0006412	0	0	0	0	0	0	0	0	0	0	0	0	0	0	0	0	0	0	0	0	0	0	0	0	0	0	0	0	0	0	0	0	0	0	0	0	0
4030	PF3D7_1314600	lipoate-protein ligase 1	LipL1	ATGAAACGAATATTCAGGTTGGTAAGAAGATGCCATTATTCCACTGAAAAAAGGACAAATGGACCTTTGGTATTAGTATCTAATAATCAGAATATTCATTTTAATTTATCTTTAGAAAATTTTCTTTTAAACAATTATAATGATTTACTAAAATATTTAAATATAAATACTATTGAGAAGTTTAATGAACCAATTTTATTTCTATGGAGAAATAACCGATCTATAATTATAGGAAAAAATCAAAATATATGGAGTGAATGTAATTTAAAAAATATAAAAGAAGATGGTGTTTTAGTAGCTCGTCGATTTACTGGTGGAGGTGCCGTTTATCATGACTTAGGAAATGTATGTTTTACATTTTTAAATAATAATATTAATACTTCATCTAATTTCTTAATC…	MKRIFRLVRRCHYSTEKRTNGPLVLVSNNQNIHFNLSLENFLLNNYNDLLKYLNINTIEKFNEPILFLWRNNRSIIIGKNQNIWSECNLKNIKEDGVLVARRFTGGGAVYHDLGNVCFTFLNNNINTSSNFLIILNTLKNHFNIEAKTQGRNDITVNDQKCSGSAFKKIKDVFLHHGTILINLEKNILNKYLTPDKIKYIKHGVSSVNARTINLSEINNNITCENLCIALIKEFTKFYEQNYKENINNIKNLENNINNSNFQNKEQININNTNENNLINNTNIIPNDITVHYIDQNNNITKNPEFLKYYNLLKDWDWCYGKTPKFQNHIWKQFTFGKLELFFNVSNGFIKDGNIFSDCLDINLIDHLKSIFNNDIKYSKEDISIFFKKLNVENKNYLDE…	408	0	null	no	GO_0006464	GO_0006464, GO_0006629, GO_0009249	GO_0006464,GO_0006464,GO_0006629,GO_0009249	0	0	0	0	0	0	0	0	0	0	0	0	0	0	0	0	0	0	0	0	0	0	0	0	0	0	0	0	0	0	0	0	0	0	0	0	0
559	PF3D7_0320700	signal peptidase complex subunit SPC2, putative	SPC2	ATGTCAGGCAATAATGTTCAAGAGGAAGATAGCACATTTCATGTGAGCAACTTATACAGCGAAACGGAAATAAAGAAAATTACCCAAGACTTTATAAGTGAAAAAATACGAGAACAAAATTTTGAGGAAATTGTAAAATACTCAAATATACGAATTTTTTTGAGCTTAGTTTTGATAGTTATAGGAACATACTGCTCAATATTTGTTCAGTATAAAAAAAACCCAGTGATTATGATACAACTATTGGTGGCTTTTTTTGTAGTATCAACAACTTTGATTATCTTTGAATATTTTTTCTTTGATGATGTTTTTATGATATTAAGATCGAATAACGGTTCCTTGGTAAAATTGTATTGTCGTTTGGACGTGAAAAAAAGTACCCTAATTTTGGCCTATAAA…	MSGNNVQEEDSTFHVSNLYSETEIKKITQDFISEKIREQNFEEIVKYSNIRIFLSLVLIVIGTYCSIFVQYKKNPVIMIQLLVAFFVVSTTLIIFEYFFFDDVFMILRSNNGSLVKLYCRLDVKKSTLILAYKLNKNVFETSFELKRLYNENGYLMKPYAKNVVMNFLSAHGRTLKLKN	179	2	null	no	GO_0006465	GO_0006465	GO_0006465,GO_0006465	0	0	0	0	0	0	0	0	0	0	0	0	0	0	0	0	0	0	0	0	0	0	0	0	0	0	0	0	0	0	0	0	0	0	0	0	0
4198	PF3D7_1331300	signal peptidase 21 kDa subunit	SP21	ATGGATTTTATAAAAGAACAATATAATTCGTTAGTCCTAGACCTTAGAAAGACATTTAGAAATAAAAGAGATGGACTATCTCATATTTTAAATGTCATATGTTTATTACTTAACGCATTGATGATATGGAAACTTTTGGTAGTATTCACAGGATGTGAATCACCCGTTGTTGTTGTATTAAGTGGGAGTATGGAGCCAGGGTATTATCGAGGTGACACATTGGCATTGTATCATCCTCCAAAAATACATGCGGGGGATGTAGTTGTATATCAAATAAATGGAAGAGATATACCAATTGTTCATAGGATTTTAAGTTTGCACACATCAAAAGATAATAAATTTCACTTATTATCAAAGGGTGATAATAATAATATTGATGATAGAGGTTTATATGATCCA…	MDFIKEQYNSLVLDLRKTFRNKRDGLSHILNVICLLLNALMIWKLLVVFTGCESPVVVVLSGSMEPGYYRGDTLALYHPPKIHAGDVVVYQINGRDIPIVHRILSLHTSKDNKFHLLSKGDNNNIDDRGLYDPHQYWLENEHVLGLSVGYTPYIGILTIWINEYPVVKWAIVSIMLIMILMGYE	184	3	null	no	GO_0006465	GO_0006465	GO_0006465,GO_0006465	0	0	0	0	0	0	0	0	0	0	0	0	0	0	0	0	0	0	0	0	0	0	0	0	0	0	0	0	0	0	0	0	0	0	0	0	0
19	PF3D7_0102600	serine/threonine protein kinase, FIKK family	FIKK1	ATGCTAAATATGATACAAAAAAAAAAAAACCTATTTTTAAGATCTATATTAATTAAATTTATTATTATATCTTTTTTGGGAATATTATATCTGTTTTTTTACAATGTCGAAGTTTTGGAGGATAAGGAAACTAATAATTTAGAATTAATCGTGAATGAGTCACGATATTTAGCTGAAAGTCGAAAAGATTTAGAGAAAAAAGGTGATAAACCTAATAATATTAATGTTGATAATTTCGGAGTTAGGGGAAGTAAAAATAAATGTGCTATAAATAGTGAAGAGAGGCGTGGAAATAATTGTGAAGGAATAAGTAAATTGTTTGTAGGGTGTACAAAAGGTTTAAAAAAATTTTGGAATAAAATTAGTTGTGATCCTTTATGTATTGAAAAAAACGATTCA…	MLNMIQKKKNLFLRSILIKFIIISFLGILYLFFYNVEVLEDKETNNLELIVNESRYLAESRKDLEKKGDKPNNINVDNFGVRGSKNKCAINSEERRGNNCEGISKLFVGCTKGLKKFWNKISCDPLCIEKNDSNSDNNYNNDNNIQNNTCSVNNDLLKNEFEIKDVNVKEVDDDIISRDMNKNCVNEINNMNKEKDSKIIYTWDLGRESLGKLLDSSKNFSINGVKYDDWETTPIPTCGASRVMEKCQKMYKVVIKPKEKDDKVDNKIKMGNCNDCDKIKGKDNNEEEGDEIKLFMKKVPIDVWVKQYDLMKEYDGEYLSVGENFVMESVVLAFLNEYHPGIAPKFYKFLYEPDMNNDLNNKCDEKNKYVLHIDRNLDTFNERLREEVNNNKKGYVVMV…	630	1	HMM: MLNMIQKKKNLFLRSILIKFIIISFLGILYLF, NN: MLNMIQKKKNLFLRSILIKFIIISFLGILYLF	yes	GO_0006468	GO_0006468	GO_0006468,GO_0006468	0	0	0	0	0	0	0	0	0	0	0	0	0	0	0	0	0	0	0	0	0	0	0	0	0	0	0	0	0	0	0	0	0	0	0	0	0
68	PF3D7_0107600	serine/threonine protein kinase, putative	null	ATGCTAATAAATAAAAGAAAAAGAAGAAAAGCATACATATACAACGACGGATATGAATATATAAATAAAAAAATAAAAAACAAATTTATATTTATATGTTTAATAGCGGTTGGAGGGTTTTCATGTGTATATAAAATAAAGAAGAAAGAAAAAAAAGAAAAAAAAGGAAAAAAGAAAAAAGAGAAATACTATTATGATCAGAAACAAAATTGTAAGGACAAATTTTATGCTTTAAAGAAAATAAAATTTCATGCAAATCCAAAAAATTTAAAAGAACAAATTTTATTAAATTTAAGAGAAATCAAATATTTAAACCTCTTGAAAAAATATACAAATATCGTTTACCCACATGAATACTGGATAGAAATTTATAAACCTTTTTACAAACAAAAGAAAATT…	MLINKRKRRKAYIYNDGYEYINKKIKNKFIFICLIAVGGFSCVYKIKKKEKKEKKGKKKKEKYYYDQKQNCKDKFYALKKIKFHANPKNLKEQILLNLREIKYLNLLKKYTNIVYPHEYWIEIYKPFYKQKKIKSDKKKKNKKKIKKQKLSLFKDTIKIIKKRKKDKLKKKKKIEFFFKNIQYSSDTDDIKITFEDAHPEKVKNNNNIKDIKYIKKKVQKDYKKNNKKNDKNNVNKNNTYNNKYKVVINKIIGKKYIINKIKINRNKKIYIYRHMYGHIYGHMYGHMYDLFNINKNSYYTYNNNNNNNNNDKFKSLKGLKRNNLFINKNQTIPYPSSCYYYSSHTTNKFKSLNEKQFTYVSSFSSHMWCTASRRKTFSYNQKDNYQEIKKLNKYYNYKS…	1595	1	null	no	GO_0006468	GO_0006468	GO_0006468,GO_0006468	0	0	0	0	0	0	0	0	0	0	0	0	0	0	0	0	0	0	0	0	0	0	0	0	0	0	0	0	0	0	0	0	0	0	0	0	0
165	PF3D7_0203100	protein kinase, putative	null	ATGTTTTCAGTCGAATTAGAAAATCGATCAGGTTATAAAAAAAGGAAAAAAAAGAAATGGAATAATAAAAGTACTGGTCAGGATAAATTTACGAACAAAGATATTATATCAGAGGAAAAAGAAGAAGGACTTGATATAGAATGTGGTCATAATATTCTGGGGGATGTACAATATGATGGTACATATAATATAAATGAACAAGTTAAGAAAAATTCATTGTTCTATTTTAAATGTAAAGAGGAAATTAATTTAAAAGATGGAAATATAATATTGGATGATAAAAATAGAAAAGTGGATGATATAAATATAACAGGGGATGATAAAAATATAAAAGTGGATGATAAAAATATAAAAGTGGATGATAAAAATATAACAGGGGAGGATAAAAATATAACAGGG…	MFSVELENRSGYKKRKKKKWNNKSTGQDKFTNKDIISEEKEEGLDIECGHNILGDVQYDGTYNINEQVKKNSLFYFKCKEEINLKDGNIILDDKNRKVDDINITGDDKNIKVDDKNIKVDDKNITGEDKNITGEDKNITGDDKNIIFDVDEILIHQHNTSNSNIYINCNDNNNDIRNSSNVQHYYNDKIKENINKQNKKYVLINDYINNKYILSKNKTCKINKGKKLIKKKKVNNISRRRNHILYKCRNKLYNGNVFSDDIIKSEVNVCNSLTVLHKNYNINMDNYLDDNIHTNNSNIYDINYTNENVINSTCRYYPIGNNNTLSKDEVTKSSSKINSLSYFDDIINVNKNDIPILHDKENINIISNKESCHKDEKEEEKYIMYNSNLVEEKKQKKMIW…	2485	0	null	no	GO_0006468	GO_0006468	GO_0006468,GO_0006468	0	0	0	0	0	0	0	0	0	0	0	0	0	0	0	0	0	0	0	0	0	0	0	0	0	0	0	0	0	0	0	0	0	0	0	0	0
250	PF3D7_0211700	tyrosine kinase-like protein, putative	TKL1	ATGGGAAAAAGAATAAAATGTAATAACGTTTCTTATATAAGAACTGTCAGGGGAGTTTATATCGGCAGAATAGAAAACGGACAAAAGAATGGATGGGGTTTACAAATAAATAATAACGGAAATAAATATGAAGGCTTATTTAAAAATGATGAAAAGTATTTATTCGGGTTAGAATTAATATGTTGTTTGTGTGGTCATACGTATAGGAATAAAGTTCAAAATGGAATATATGAAAAAGGTAAAATTCATTATAAGGATGTAAATAATATTAGTGCTTACAATAATGATGATCAGCACGACAATATTCATCATGAAAAGGTTTATCATGAAAATATTCATCATGAAAAGGTTTATCATGAAAATATTCATCATGAAAAGGTTTATCATGACAATATTAAT…	MGKRIKCNNVSYIRTVRGVYIGRIENGQKNGWGLQINNNGNKYEGLFKNDEKYLFGLELICCLCGHTYRNKVQNGIYEKGKIHYKDVNNISAYNNDDQHDNIHHEKVYHENIHHEKVYHENIHHEKVYHDNINHEKVYHGNIYDHNIYHNNKFNFQYSSENEFAKGNICVHENRYIYIGTYKKGKKHGKGILINYNNYFMYSCIFYKNKIIYVDMLFSKVQKYMNMKNIDMKHYNTHKKKKIYLFLQKEYKNKILGFINFYKHITHKIKKKQENVHDKITFLKCLKELFFVTHTNKENNQMEGIIHTYKNYTINKNDNTYNIFKEKLHNITQGGNKTQHEKRYMKTIYRHAGHENVILNNKRKEKNKSTNMSSDEKKTNKHTNISSDEKKKNKHTNISS…	1233	0	null	no	GO_0006468	GO_0006468	GO_0006468,GO_0006468	0	0	0	0	0	0	0	0	0	0	0	0	0	0	0	0	0	0	0	0	0	0	0	0	0	0	0	0	0	0	0	0	0	0	0	0	0
279	PF3D7_0214600	serine/threonine protein kinase, putative	null	ATGGATAACAATGGAGTGGCCAAAACTTTGAAAAAAGATATTTCATATTTTGATGAAACGAAAGAGTATTCAAAAAAAAGGTTTGATAAGTTTAATGATATATATGAAATTATTACTAATCATAAGAACAAGCAACCTCATATAAAAGAAAATAATATAAAATATATAACAAGAAATGTGAACTATGATAGACTGTCTGTTGATGAGAAGAAGAAAAAAAATGATATTAACAATATAGATAAGTATGAGAAAACAAAGACCTGTTCATACGTTTTAAATAATTTACATAAGAAATATAATCATCATAATAATAAAATGTATGATGAATATAAATTTTATGATTATTACGAATTGATTAACAAAATAAAGAAATTGAAAGGTTTTAAAAATGTAATAGAG…	MDNNGVAKTLKKDISYFDETKEYSKKRFDKFNDIYEIITNHKNKQPHIKENNIKYITRNVNYDRLSVDEKKKKNDINNIDKYEKTKTCSYVLNNLHKKYNHHNNKMYDEYKFYDYYELINKIKKLKGFKNVIEERGKGNDNRLGVSSTSNDKKKNNKKRYNNNNNNDNNNDINNDCNNNKYNPCCSSCNGNVLSSSKTFNMCEGDKKISYGRQITNLVSCYKYNNQLKSPYNIHTINQQVHDNNIYVDNQHMLYHNYTDNLKYSNYNKMNDLSYNLHEKKNSFSNFINSGPRDNPMELCKKLKKAVEYKERVIDINKEKDFVLLGISKTCVKKCNTCSGDNVTKDIDKCVEDEEKSKEGVILNYMKKDILFYNTFNRNNNDPNRKEKPKECDKYNKDDV…	1714	0	null	no	GO_0006468	GO_0006468	GO_0006468,GO_0006468	0	0	0	0	0	0	0	0	0	0	0	0	0	0	0	0	0	0	0	0	0	0	0	0	0	0	0	0	0	0	0	0	0	0	0	0	0
376	PF3D7_0302100	serine/threonine protein kinase	SRPK1	ATGAGTTTTAGTAATACATGCTCACTATCCAATAACAGCAACAGTTCTAGTAGTAGTGAAGATGCTACTTCTGGTAAATTACAATACACCGAAAGTGATGATGAAGGAAGTGATGAATACTGCGAAGGAGGGTATCACCCAGTCAAAATTAATGAAATATATAATGATAGATATAGAATTGAAGGAAAATTAGGTTGGGGACATTTTTCAACCGTTTGGGTTGCTACTGATTTAAAAAGTAAACCCTTAAAATTTGTTGCTATAAAAATTCAAAAAGGATCAGAAACTTATACTGAATCAGCCAAATGTGAAATTAATTATTTAAATACAGTCAAAGTAAATTCTTTTGATTCTTCATGGGTTGAATTAAAAGAACAACAAAGAGAAAGATTATTTCAT…	MSFSNTCSLSNNSNSSSSSEDATSGKLQYTESDDEGSDEYCEGGYHPVKINEIYNDRYRIEGKLGWGHFSTVWVATDLKSKPLKFVAIKIQKGSETYTESAKCEINYLNTVKVNSFDSSWVELKEQQRERLFHYNMTKGVVSFIDSFEHKGPNGTHICMVFEFMGPNLLSLIKHYDYKGIPLNLVRKIATHVLIGMQYLHDVCKIIHSDIKPENVLVSPLTTIPKPKDYTKDKLESNKSNQVEKKENDQNVDKKLITTMNNNINTNLSEKKKVINDTQKNDKNIEYDQKCTSSKENIEDNVSFVNDPSDPNQKNNLNNNITDNNIIPSNVQIEKQSTLSKNKKNEKDSYININNSLTNDDQNLKREDIKFNDKAEGITKYDMLNIKNNISIKEKINDCH…	1338	0	null	no	GO_0006468	GO_0006468	GO_0006468,GO_0006468	0	0	0	0	0	0	0	0	0	0	0	0	0	0	0	0	0	0	0	0	0	0	0	0	0	0	0	0	0	0	0	0	0	0	0	0	0
443	PF3D7_0309200	serine/threonine protein kinase, putative	ARK2	ATGAATGAACATATCAAAAGTTTTAAAAATGATAATGTTCATTATACCAAGAAAAATGTTATAAGAAATTATGATGATCATAATAATATTAAAGCAAACTCACATTTAAAATTGCAGTCAAAAGAATATACTACACATAATGATGAAAAACAAAGATGGATCACTTCAAATAATACTAATAATAATATACAAACTCATGCAAATGTAAAATGTGATGATAAATCAGTAGAAAATAAAACAACAACCCTGATAAATAAAGATATTAATGAAATCACAAATATTTCAAAACAGGATAAAAATTACACAAAATATAATTGTCTGAATTTTAATAAAAGTGATGTAATGAGGGATTATGTGAGATATAGTAAAAAGGAAGATTCTTCAAGTAATAACATGAAC…	MNEHIKSFKNDNVHYTKKNVIRNYDDHNNIKANSHLKLQSKEYTTHNDEKQRWITSNNTNNNIQTHANVKCDDKSVENKTTTLINKDINEITNISKQDKNYTKYNCLNFNKSDVMRDYVRYSKKEDSSSNNMNGNNNMNGNNNMNGNNNMNGNNNMNGNNNMNGNNNMNGNNNMNDNNNMNGNNIMNGNNIMNGNNNINRNNIMNGNNIMNGNNNINRNNIMNRNNITNNHIIHHISNKTSLIENNKKKEENIFPSANLYKKEMNVKGSSDTFDLLYKRKIDKDDNLSKKKKRPNYLFNKDGEHFVNKENVQNNIIDDDDDDDDDNHHDNVVVVYDKVKENEMNENKNKKSVKEDGLHNVLVELRNKDNLVVNDNIINKSFEKNNILYIKTSDSLNENY…	1650	0	null	no	GO_0006468	GO_0006468	GO_0006468,GO_0006468	0	0	0	0	0	0	0	0	0	0	0	0	0	0	0	0	0	0	0	0	0	0	0	0	0	0	0	0	0	0	0	0	0	0	0	0	0
451	PF3D7_0310100	calcium-dependent protein kinase 3	CDPK3	ATGAATGATTTGATTATTAAGAATAATAAAAAGGGAAGCTGCGATGTGATTATAAAATATAAATGTAAAAAGTCAGATGAGAATATAAAAAGAAGAAAGAGTTCACATAAATATATAAAAAATAAGAGTGTCGTATTAGGTCGAAGCATAATGACAAATAAGAAGGAGAAATTAAAAGGAGCTTTAAAATACAAAGGATCAAAAAAAGAGATAAAAATATGTAATAAGAAAAGTATGATAAAAAATGACAAAGATGAAAATACAACTTTAAAATCTATGAAAAGTGACAATTTTAAATTTTCAAGAAGAGGATTTATTCTGAGTTTTACTGGTAATTTAGAAGATTTTTATAATTTATCAAAAGAACCATTAGGTAAAGGTACATATGGATGTGTATAT…	MNDLIIKNNKKGSCDVIIKYKCKKSDENIKRRKSSHKYIKNKSVVLGRSIMTNKKEKLKGALKYKGSKKEIKICNKKSMIKNDKDENTTLKSMKSDNFKFSRRGFILSFTGNLEDFYNLSKEPLGKGTYGCVYKATDKLLKISRAVKVVSKKKLKNIPRFRQEIDIMKNLDHPNVVKLLETFEDSNQIYLVMELCTGGELFDKIVKKGCFVETFASFIMKQIFSVLNYLHIRNICHRDIKPENFLFYDMTPESLIKIIDFGLASYFTHNNYEMKTKAGTPYYVAPQVLTGSYNYKCDMWSSGVLFYILLCGYPPFFGESDHEILSMVKKGKYQFKGKEWNNISEEAKDLIKRCLTMDADKRICASEALQHPWFKKKKYAFNMDMKMDIHVLENFKNYGL…	562	0	null	no	GO_0006468	GO_0006468	GO_0006468,GO_0006468	0	0	0	0	0	0	0	0	0	0	0	0	0	0	0	0	0	0	0	0	0	0	0	0	0	0	0	0	0	0	0	0	0	0	0	0	0
465	PF3D7_0311400	protein kinase, putative	null	ATGCAATTAAAAAACAATTTTTACCTTTCAGAAAAAAAAGACAACGAAAAATTGGTTAATAAGAATACACATTTAGATAATTCAATAATAAAAAAAATCTATACTTTTTATAAAAATAAAGATGAGAAAGTGGTAGATAATTTTGATTGGACGTTAGAAATTCTGAATAACCTTTATAATGTCGAATTACCAATATTATATAAAATGTTTGATATAAATAGTATTTGTGTATCTTTAAAGTTGAAATTGAAAATAAAAAATAATAATGAGGCATCAAATAAAAATTATTTTTTATATTTCGATATAAATCCTGGAGGAATCATGTCCAAAAATCAAGAAAAAATTTATTATGAGTATAAATTTATTAGGGATAAAAATGACGACACTTTGGAAAAGATG…	MQLKNNFYLSEKKDNEKLVNKNTHLDNSIIKKIYTFYKNKDEKVVDNFDWTLEILNNLYNVELPILYKMFDINSICVSLKLKLKIKNNNEASNKNYFLYFDINPGGIMSKNQEKIYYEYKFIRDKNDDTLEKMPREQKMKYFSSLSYKLAGKVIEYKESKYKLINVLQSAIYGSVYLSEVVEGGGNGLSKRYKAIKILSKHLIEMAKDKVQEDPLSEYYYRDSMSGHSNILSCDNIFDDNLYIYMVMPFAVHGDLFEVMKNRNKCFNEEEARYLFHQILLAIKFLHSKKMALRDISLENILLFENEKNGLIYPVLNDPGQAIYFNVNKRNNVILEDYKKMFGKIFRPPEIYMKCKYDPTKVDIFCVGYILYFCLTKHELFKCSLDKDIYWKMFKNKNYK…	2515	0	null	no	GO_0006468	GO_0006468	GO_0006468,GO_0006468	0	0	0	0	0	0	0	0	0	0	0	0	0	0	0	0	0	0	0	0	0	0	0	0	0	0	0	0	0	0	0	0	0	0	0	0	0
566	PF3D7_0321400	protein kinase, putative	null	ATGGGTTTACGTTATTCATCAAAGGAAGAAAATGCTAAATATTTTCATCGAGGATATATATTTGAACCAAATATAAGACAAATTGATGGTTTGGATTTTTATAATTGTATTTTTCTTAAGAAAGGAGAAAAACGATTAGTTAGAAAAGTGAATAATGTCATGTTGAAGGGATGGACATTTCATGATTTGTTAAAAATAAGAACATTGAATTATGAATGTATAAATACTCACTTAAATTATTTATTAAGGATTTATAATATTTTTGAAGACCAAGATTTTGCTTATGTTGTTTCAGAAAATTGCTCGGGAGGATTTCTGTTTGACGTTTTAAAAAACAATGACACGATTATTAGTGAGCAATCATTATCTACATGGCTATATCAAATAATAACAGCTCTT…	MGLRYSSKEENAKYFHRGYIFEPNIRQIDGLDFYNCIFLKKGEKRLVRKVNNVMLKGWTFHDLLKIRTLNYECINTHLNYLLRIYNIFEDQDFAYVVSENCSGGFLFDVLKNNDTIISEQSLSTWLYQIITALLFMEEHDIYHGNVNGYCIFFKDEDRKEIRVSLLSKNSKYDNFDEDGNLYGLFYIRSPQEIRKLYHDKNNTWYIGVLLYLFLFGTYPFISNNVLLNYYNIVSKDILFNTSQIQNKNFSPFVLDFLEKALEKNYVKRPTLKELLKHPWITGREKHSNIDIVDEKTRMMAQQTIVCAENIILNLEEDNE	319	1	null	no	GO_0006468	GO_0006468	GO_0006468,GO_0006468	0	0	0	0	0	0	0	0	0	0	0	0	0	0	0	0	0	0	0	0	0	0	0	0	0	0	0	0	0	0	0	0	0	0	0	0	0
736	PF3D7_0415300	cdc2-related protein kinase 3	CRK3	ATGAACGTTAAAGATGTGGATACCCTTTTAGATATTTTTAGAGGGGGGCCAGGTGTTCATACTTGCTCAGGTATTGAAAATTATTTTTTAGAAAACAATACGTTAGATGTTGATATTAAAAAAGAATTCATAAAAAGGTTGGAGAACCCCACATTTTTATCAAAGTTTTGTATGTTAAAGAGAAAGTTCGTTTATAACTTTTTTCTAGTCAAAAAGGAAATAGTAAAAAAAAGGTTATGGACTTATATAGAAAATATTATTGATAAATTAAATGATGATGATATTATAAAAGTACATAAATATTTAGAAAAGGAATCTGGGAATGTTATTCATACCTTTTTAAATAATTTATATTTGTATAAAGATATGGAAAATAAAAGAAGAAGGAGGAAAAATATA…	MNVKDVDTLLDIFRGGPGVHTCSGIENYFLENNTLDVDIKKEFIKRLENPTFLSKFCMLKRKFVYNFFLVKKEIVKKRLWTYIENIIDKLNDDDIIKVHKYLEKESGNVIHTFLNNLYLYKDMENKRRRRKNIKRKKKEKKKRNNHDIYNNCNINSNKLDCNLPYNLNLENIFWKQINLKNYKKKYFYHINKNINSLWKVYLSYNLLNINKCERKDLIKNILHTLLKKEYEQLSCFEWDSKVVLYKLLKNQDLKKCSLENYTEDDVTSNPSNDFDNTVDIDLNMKENVQNKDKVHVGDKIGSIPEGDNICLQTDDQTYNHNNNNIMLKKKKKSSENHILINSNNVLLNYNKNSELLDDCFKLCNNNNNNVHIYDKSNVSYTNLNDLKNGYYKDTDIIYD…	1339	0	null	no	GO_0006468	GO_0006468	GO_0006468,GO_0006468	0	0	0	0	0	0	0	0	0	0	0	0	0	0	0	0	0	0	0	0	0	0	0	0	0	0	0	0	0	0	0	0	0	0	0	0	0
761	PF3D7_0417800	cdc2-related protein kinase 1	CRK1	ATGGGAAAAGGGCATGATGTAAAGAAAGAAAGAGGGAAGAAGGATGAAGATGAACACAATGAGTATCATCCTTATCGTCGGGATAATAAATCTTTTTATTCAAAAAATTATAAAATGAAAAATAAGCATTCGTATAATTCCTCAGATGAATATAAGAAATATGTTTCACATGATACGTACAATTCATATGATACATATAATTCATATAAATCACATGAAGAGCATAAAAATAACAAACATATTTCCATCAAGCCAGTAAACAAAAACAAATATGTACATTCCCCGTCTCCCAAAAAAACAAAAAAAATATATGATGAATTAAGTGATTATAATAAACATAAAAAATACTCTAGCTCCAAAATGGATAAAAAAAAAGATTCTTACTATAAGGAACAATCA…	MGKGHDVKKERGKKDEDEHNEYHPYRRDNKSFYSKNYKMKNKHSYNSSDEYKKYVSHDTYNSYDTYNSYKSHEEHKNNKHISIKPVNKNKYVHSPSPKKTKKIYDELSDYNKHKKYSSSKMDKKKDSYYKEQSNKYKEKRKYDESSQDTYDKKRKRKRKKKKYDYEREEEKYNRYDERRDSSYYTSNYSEDSSKREGGKKEKEDLYISRKEFSGKKKSHKGEHNNNNHHTDQHIKNNYHTDQHNNNNHHTDQHNNNNHHTDQHNNNNHHTDQHNNTISDQINIFPEKNKRDNRINEEKYTIKEHLIYEDEQNISYESNKDSSSEENTILNEYSSDEEKNKIDCILNGCRNVKNYKKLNKISEGTYGAVYRAQNKRTKKIVALKKLKNFSSMHNEGFAMT…	699	0	null	no	GO_0006468	GO_0006468	GO_0006468,GO_0006468	0	0	0	0	0	0	0	0	0	0	0	0	0	0	0	0	0	0	0	0	0	0	0	0	0	0	0	0	0	0	0	0	0	0	0	0	0
822	PF3D7_0424500	serine/threonine protein kinase, FIKK family	FIKK4.1	ATGAAGAAAAAAACAAGGGAAGAAATAATAATATTCTTAAAATGGGTGTCTTGTAAAAAATATATATTTTCAGTTTTTGTGTTTTTATGTTGCTTTTTAATGAGCTTCAACATATTTGAACCCAGAATCGAAATAATAGAATTGAATTGGCATGTTAGATACTATAGACATTTAACCGAAGTATGGGATAATAATAATAATAATGATGAGGGAGAACAGAATTTAAAGGATAAGTATGATACATATGATGAGAAGGAAAAAGTGAAGAAAAAATATGTAGAAGATGAATTTAATACGAAGGAAAAAGTGAAGAAAAAACATAGAGATGATAAATATAATAAGAAGGAAAAATCGAAGAAAAAACATAGAGATGATAAATATAATAAGAAGGAAAAATCG…	MKKKTREEIIIFLKWVSCKKYIFSVFVFLCCFLMSFNIFEPRIEIIELNWHVRYYRHLTEVWDNNNNNDEGEQNLKDKYDTYDEKEKVKKKYVEDEFNTKEKVKKKHRDDKYNKKEKSKKKHRDDKYNKKEKSKKKYVEDKFNKKNKHKENDVSLKKDQCKKSLSIREDCNNKNSKSYNEKEICDNENCVNLEDIKIYDNTTWKYKIKKLITCSYNSDKDAKVLYNWKLGKSILGKMINSTEDFSINGISYKDWTLNTIPDIGYSQNNRRSQEVFKTEVKSKDENTESVKLFIKKVPASIWVRQYIILNEHKGEYSLGEENFVMEAISLAFLNKYYPGIAPKFYGILYESPDKPNDNVCFSFGRGKCNNLKKFNDMLINQLQLNNKANVIMISELYGED…	622	1	null	no	GO_0006468	GO_0006468	GO_0006468,GO_0006468	0	0	0	0	0	0	0	0	0	0	0	0	0	0	0	0	0	0	0	0	0	0	0	0	0	0	0	0	0	0	0	0	0	0	0	0	0
839	PF3D7_0500900	serine/threonine protein kinase, FIKK family	FIKK5	ATGTTGGGTTTTAATTTTTTTTGTTCTTTTTTAAATGAATACACCCTAAAAGAAAATATAATAAGGCGCAATGATAGAGTTTGTGCTTCTTATATGGATAAAAAGAGAAAATTGAAACATTGTTCATTAAGTAGACCATTTAATATACAGTCATTTGTATCTGTACTTATATTTTCCTTATTAGTAATTTTTGTCTCTGGTGATAAAATATTTATTGATTCATTAGATATAAAAAGTTCCCATTGCAGAAAATTAAATGAAAGTGTTAATGTTATTGTTAATGAAAATTTTAATTCGGAAGATAATAAATTAAAAGGAATAAGTAAAATAGATGAAAATCGTTTGAATCATGAAGTTTTATATAATAATCGAAAAATATCAATTAAGAAACATGAAAAT…	MLGFNFFCSFLNEYTLKENIIRRNDRVCASYMDKKRKLKHCSLSRPFNIQSFVSVLIFSLLVIFVSGDKIFIDSLDIKSSHCRKLNESVNVIVNENFNSEDNKLKGISKIDENRLNHEVLYNNRKISIKKHENKDESLENSNKNFELNGVDLYHGNVELKNIKNLDDNDKMDLKHEYNNENVGDTNNLEEEIKDKTIYTWALGKDALSDKLYSSSNYSLNGIQYNYWRLSAIPTINYSVRTSRVQKMFKTIIDPKKENAKDQVKAFIKKIPVDIWVKQFHSMNEYDGEFLVGGENFVMEAVTSAFLTKYHPGITAKLYALLYEPYRKYIQEDSPPKSSFENIDSFNEMLEEKIKNNKKGNVVLIYELFGESLFTNLVKSRRKPILKNRYAKKKKIIYDS…	600	0	null	no	GO_0006468	GO_0006468	GO_0006468,GO_0006468	0	0	0	0	0	0	0	0	0	0	0	0	0	0	0	0	0	0	0	0	0	0	0	0	0	0	0	0	0	0	0	0	0	0	0	0	0
866	PF3D7_0503500	protein kinase, putative	null	ATGTTACAATATTTTGTGAATAAACTTTTTGGTGATTTACCATCAAGTTTTAATTATATGATAGGCAAAAAGATAGAGTATGATATAAAGATTAGTTATTATGAAATATATGAAGGGCATGATAAAAATGGTGAAGAGGTTTGTGTATTTATATATGAGAAGAATAATAAAGAAACGAGTTTTGTAAAAAGATATATAAAAAACCATTTGTCATATTCTAAGAAATTAATTCATCCTAATATTTTAAAAGTACTAGATACTTATGAGAATGAGAAAAGGATATATATAGTAACTGAGAAATGTGTACCATTAATTTATGAAAAAATAAAGAGTGACCCTATATGGGGTTTATATGAAATAATGAGATGTATTCATTTTATTAATTCATGTAATTATATA…	MLQYFVNKLFGDLPSSFNYMIGKKIEYDIKISYYEIYEGHDKNGEEVCVFIYEKNNKETSFVKRYIKNHLSYSKKLIHPNILKVLDTYENEKRIYIVTEKCVPLIYEKIKSDPIWGLYEIMRCIHFINSCNYIHGLINPLSIFVNSKGRWKLSNFDCIHEKNMSICNIYNDIKDHIFCSYGYKINIPNNIHSTYIDCNGLILLMIWSYKKYICSTGSMNDEYMFYENGKNNSNNVMRNMSKVDGLKMGSEKNDALFTFGNNIYNKNNVHNNTCSMMNYLSSDPYSITFPIFNVNYKKDKMEYIPHNLHKIYDMLNTYNCVEIDLNKILNDENLKNNNHIVRTMLFLTEIHMRSKIEKSIFLDNLFKHIDNISLDVKVQMILPELCKNIDIFENYIKCLK…	850	0	null	no	GO_0006468	GO_0006468	GO_0006468,GO_0006468	0	0	0	0	0	0	0	0	0	0	0	0	0	0	0	0	0	0	0	0	0	0	0	0	0	0	0	0	0	0	0	0	0	0	0	0	0
1085	PF3D7_0525900	NIMA related kinase 2	NEK2	ATGTCTAAACCCAAAATGATAGGTCCTTATGAGGTGGTAAAAAGTATAGGAAGGGGTTCGTTTGGAATTGTAACTGCTGTTAAAGATGAGAATGAGAAAATTTTTGTAATTAAGGAGCTGGACATATCATGTATGAACAACAAGGAAAAAATGAATGTAGTAAATGAAATAAGAGCCCTCATAAAAATGTCAGTTCACCCTTTCATAGTTAGATATAAAGAAGCTTTCGTTGAGGATTGTGTTTTGTATGTAGCCATGGATTATTGCATAAATGGGGATTTAGGAAAAGTAATAAAAAAACATAAAGAATTAGAAACTCCCATCCCTGAGAAGAAAATAAAAAGATGGTTGTTACAAATAATTATGGCTATAAAATTTATACATGATAAGAAATTAATA…	MSKPKMIGPYEVVKSIGRGSFGIVTAVKDENEKIFVIKELDISCMNNKEKMNVVNEIRALIKMSVHPFIVRYKEAFVEDCVLYVAMDYCINGDLGKVIKKHKELETPIPEKKIKRWLLQIIMAIKFIHDKKLIHRDLKCNNIFLDEKERAKIGDFGLAKFIEQTEQTNTLCGTIGYMAPEICKNINYSFPADIWSLGIILYELISLKPPFKSNNSNMLSVAQKICEDEPDPLPDSFSKDLINLCYWMLKKDWKDRPTIYDIISTDYIQDELQLFKREMLQERNSQI	286	0	null	no	GO_0006468	GO_0006468	GO_0006468,GO_0006468	0	0	0	0	0	0	0	0	0	0	0	0	0	0	0	0	0	0	0	0	0	0	0	0	0	0	0	0	0	0	0	0	0	0	0	0	0
1247	PF3D7_0610600	calcium-dependent protein kinase 2	CDPK2	ATGGGAAATCACTTATCAGTAAATAAATTAAAAAGGAAAAAAAAAAAAAAAAGCTTTTTAAATATATATGGAAAAAATACTAATGAAAATACAAGTAAACAAAGTAATGATTATAAATATGATATAAATACAAGTTGTATATCAAGAGAAGGTACAACAACATTAGAAAGGAAAAATTTAATATTATGTCATTCGGGAAAATTAGAAGATAAATATATTATTGATGAAAAATTAGGACAAGGTACCTATGGTTGTGTATACAAAGGTATAGATAAAGTTACAAATCAATTATATGCTATAAAAGAAGAAAAAAAAGATCGATTGAAAAATATAAATCGTTTTTTTCAAGAAATTGAAATTATGAAAAAATTAGATCATCCAAATATTGTAAAATTATAT…	MGNHLSVNKLKRKKKKKSFLNIYGKNTNENTSKQSNDYKYDINTSCISREGTTTLERKNLILCHSGKLEDKYIIDEKLGQGTYGCVYKGIDKVTNQLYAIKEEKKDRLKNINRFFQEIEIMKKLDHPNIVKLYETYENDNYIYLIMELCSGRELFDSIIENGSFTEKNAATIMKQIFSAIFYLHSLNIVHRDLKPENFLFQSENKDSLLKIIDFGLSKNLGTGEFTTTKAGTPYYVAPQVLDGKYDKKCDIWSSGVIMYTLLCGYPPFYGDTDNEVLKKVKKGEFCFYENDWGSISSDAKNLITKLLTYNPNERCTIEEALNHPWITQMTKSHEHVELSSTLLKNLKNFKKENELKKIALTIIAKHLCDVEINNLRNIFIALDVDNSGTLSSQEILDGL…	513	0	null	no	GO_0006468	GO_0006468	GO_0006468,GO_0006468	0	0	0	0	0	0	0	0	0	0	0	0	0	0	0	0	0	0	0	0	0	0	0	0	0	0	0	0	0	0	0	0	0	0	0	0	0
1380	PF3D7_0623800	tyrosine kinase-like protein, putative	TKL4	ATGGAGAATCCATTTAAGATTCCAAAAAATGATGTTGATATGAATAATAATAATAATAATAATAATAAAAATAATAATATTTCAAAAAATATACATAATAGTATACATAATAATATACATAATAATTATTATTATATAAGTAATAATAGTAATATAGATAATATTAATAATAACCCTAATAGTAGCATTAGTAATAATAACAATATATTATTAAAAAGTAGCACAATAAATAATAAGTTATTATATAATACACATCGTGAGAATATCAACATATTAAATAATAAGAGTAAGAGTAATAGTAATAATAATAGTAGTAGTAGTAGTAGTAGTAGTAGTAGTAATATTAGTTTACTTATGAACCCATTAGGAAATAATAATAAAATAATAAAAAATCACGAA…	MENPFKIPKNDVDMNNNNNNNNKNNNISKNIHNSIHNNIHNNYYYISNNSNIDNINNNPNSSISNNNNILLKSSTINNKLLYNTHRENINILNNKSKSNSNNNSSSSSSSSSSNISLLMNPLGNNNKIIKNHEFNNEYLNNKKSPIEEDKNFNLVYINNNLLFNENNNNINTYTRTLSFKSCNNENIHDYKNDKYYASHIKLLENLEIDQFVGDHNSNVFISNKEIKSGLKANIRNNNCMNNIENNNINKNNSTTNNFISNNIGKYLTCGLNDHKIININNNSNNNNNNNINRKNIFLSNKINPFSNAQGVHSIKNLIGEKLINNNNNNNNNNNNNNNNNSNSNNIPMNDSKNNKNVILDNFMEIRNKIYNIKREKTDYEKEEKYLLHLKDLDKYKNIS…	2404	0	null	no	GO_0006468	GO_0006468	GO_0006468,GO_0006468	0	0	0	0	0	0	0	0	0	0	0	0	0	0	0	0	0	0	0	0	0	0	0	0	0	0	0	0	0	0	0	0	0	0	0	0	0
1425	PF3D7_0628200	eukaryotic translation initiation factor 2-alpha kinase	PK4	ATGTGTAATTTTATAAAAAAAGGTATTAGGTTTAATGGAGATAAATATATTTTCCTTTTTGATATATTTATAAAGAAATATTTATTAAATGTATTCGTAGCAAATATATTATGGGAAGAAGAGAATAATATATGTTTTTTAAATAGATTAAAAAATAAAAGAAAGAAAAGTATTTTATTTCTTAAAGAAGAATATTTACGATATTTAATGATATTAAATAAGGAAGAGAAGAATAAAAAGAAACGATTAAAAAAAATATATGAATGTATAAAAGTTTTTTCTATTAAAGAATTTCGATGGCTTATCAATAAGTTGGAAATAATATATTTTTATTTTTTTTGTCATTTATTACTTTTATGTATTTTTCAAAATATTTTTCTACTTACATACATGAGTAAA…	MCNFIKKGIRFNGDKYIFLFDIFIKKYLLNVFVANILWEEENNICFLNRLKNKRKKSILFLKEEYLRYLMILNKEEKNKKKRLKKIYECIKVFSIKEFRWLINKLEIIYFYFFCHLLLLCIFQNIFLLTYMSKEYFLKNIHDYMINILSNDIKFNTCIEFTHNDKYEQKCITMAYYDFLLNKKGKLKKRNKYYDIKNIEPLTGKDKNLYSYYNFSPFFPMSSSDIINVNTNDKISNILWNDKYIDTLNHVNMKKKDIPLNIHSNNILMNNYAYRKYVRSYMIKKRINDLILYNLKNIFEKINNIEKLTNINNFMNFKKEYEKVSKEVCNNNNNNYDPSDYMLILPNSSKDHALYNNINNDEYMYKKFCNFISQAREIKKQREKEKCHRDEKCDRGENYD…	3072	1	null	no	GO_0006468	GO_0006468	GO_0006468,GO_0006468	0	0	0	0	0	0	0	0	0	0	0	0	0	0	0	0	0	0	0	0	0	0	0	0	0	0	0	0	0	0	0	0	0	0	0	0	0
1624	PF3D7_0718100	exported serine/threonine protein kinase	EST	ATGAATAATAGAAAGGGTAAAACACGAAACTTTAAGAAACAAATTAAGTCGAATATGAATAAGGAAAAATGCGAAATCATAAATGACATTCATTCAAGCAATGTAGAAATAGAAAACCGTGATAATAAAAGAAATGAGATAATAAATTATAGAAAGGAAAAACATCCATGTTCTAACTTATCAAATATGACATTAAATCCGAGTTCTTATCATGTTTCAAATCCAATAAATTCACATAATGTAAATGTGTATTCATCAAGTAATAATATTATGAATTTCCGCAAGTATATAAACGACGATAGTAGTAATGACATAACAAAACAAAGTAATTTGAGTTCTATAGAATCGCATACAATGAACCTGAATAATTTATACAACTTTAATAACATATGTAATGAA…	MNNRKGKTRNFKKQIKSNMNKEKCEIINDIHSSNVEIENRDNKRNEIINYRKEKHPCSNLSNMTLNPSSYHVSNPINSHNVNVYSSSNNIMNFRKYINDDSSNDITKQSNLSSIESHTMNLNNLYNFNNICNEINSYGFKSNPLDNTKVQNMNSSYCNQMKYSDYYQHKPCLCHRRGILNTSNSSENQINSSDVCSLHKNDYTKISMNFPNASSSVNVDSNVYNSNITAPCVMNSNPMNYNNGKWGSDIINMMQTTNMNNLKINDLNLNEINKINFQDSDLSICSHGTSKSKKHKSDYSTVPYNILSNNMKPNHFTSNSVPSNNILSNNMIPNNIALNNMSSSSIISNNMASCNIPLNNMISNDGISNNIILSNLLLKSLSNKHTSNNMVSNDMLNNMP…	2695	0	null	no	GO_0006468	GO_0006468	GO_0006468,GO_0006468	0	0	0	0	0	0	0	0	0	0	0	0	0	0	0	0	0	0	0	0	0	0	0	0	0	0	0	0	0	0	0	0	0	0	0	0	0
2856	PF3D7_1039000	serine/threonine protein kinase, FIKK family	FIKK10.2	ATGGGTAATTTTTGTAAATACAACTATATGGAAACTAATAGGTTATTATATATGAAATGTTTTAAATGTAATAATTCCCCTATGTATACAATTAGTAAAAAAGATGAATATAAAAAAAAGGAAAGTTGGAATTTTGTGAATTCATTACTTTCTCGAAATTTAATATTATTTACCTTGACATTCTTATTTTTAAATATATTGAATTGTGTAAACTATAATCAGTATGATTATCCAAGTCAACATATTATAAATAATTCTATAAGACATTTATCTGATTATTCCTCAAGTAATGATAATTTGAGTGATGAACAAGAATATTTTACAACATCAGATGATTCTGAAGAAGAGAAAAAGCATAATGAGAAGATAAATAAAAAGAGGAAAAAGTGTAAGAAATAT…	MGNFCKYNYMETNRLLYMKCFKCNNSPMYTISKKDEYKKKESWNFVNSLLSRNLILFTLTFLFLNILNCVNYNQYDYPSQHIINNSIRHLSDYSSSNDNLSDEQEYFTTSDDSEEEKKHNEKINKKRKKCKKYKKRRGKLREKKKGKSNLYHNGKNKKNVSNCKKHNINLKNNLNNNNDLLNNNYNISNDCYICEQMTSQNKTKVPYGYYEEIDYIDDDDDDDDDSFRNKISNEKIELVNGNSKDKGIYYKNNLGNEKKNDYRTEDQTHLGIELIEEEFKGRNGNLDEENIDYNKERIRENIYHGLEKIEEEIKERMEELIDDGREIENEENREYNNNDIKKRRFDGDQENITSSFERTQKSVKYDSDESEELSEAESNGGIPEQNGYDNEDVVSGSDE…	913	0	null	no	GO_0006468	GO_0006468	GO_0006468,GO_0006468	0	0	0	0	0	0	0	0	0	0	0	0	0	0	0	0	0	0	0	0	0	0	0	0	0	0	0	0	0	0	0	0	0	0	0	0	0
3091	PF3D7_1123100	calcium-dependent protein kinase 7	CDPK7	ATGGGTCTCCAAACAGAAAAGGATAAAGAAAAGGAACATCAAAAAAATAATTTTAAAATATGTAGCAAAAAATTTGAAACAGATGAATTAGAAGTCCTAAAAAAGATATATAAAGAACTAGGTAGTAGATCTGGCTCAAGTTATATTGACAAAGAAACGTTTCTTCAATTTTTTCCTTTACCAGGGTTGTGGGGAGAAAGATTATTTTTAAAATTTAATTTCAAAAATACTGGTTTTATAGATTTTGAAGAGTTTATAATAGGTATAGCAATATGTTGTCGAGGGACAAAAAGTGATAAGATAAATGTATTGTTTGATATTTTTGATTTGAATGCAGATGGGTTTATCCAAAAGTCTGAGATGGTAGCTATGCTATCTAACATTCCTTATATTCATAAA…	MGLQTEKDKEKEHQKNNFKICSKKFETDELEVLKKIYKELGSRSGSSYIDKETFLQFFPLPGLWGERLFLKFNFKNTGFIDFEEFIIGIAICCRGTKSDKINVLFDIFDLNADGFIQKSEMVAMLSNIPYIHKLKNIFFNKDNRKNIYRDDYTKDDDNADDENEDHENGDAIIDSNVGTNSDGNIDIDSDADVEYNDSDSDDFTIDDDEDVDSLDDISDSFSSAYEDEDEYSNNNNNNNNNNIENMNISSDNKNVEENNIGNCSKCIKQQKNKALNANINSKRNANGNNTSLNVKELAKKIRKEEKRKFVKKLRELNAVHLYKDNQLSNKKEKDKERKKKNKDPNVSKNSPFFKSESEDYNSSSSNNTDAFVHDHIKYINKYKKKSLKNEVKKNGHKYK…	2265	0	null	no	GO_0006468	GO_0006468	GO_0006468,GO_0006468	0	0	0	0	0	0	0	0	0	0	0	0	0	0	0	0	0	0	0	0	0	0	0	0	0	0	0	0	0	0	0	0	0	0	0	0	0
3225	PF3D7_1136500	casein kinase 1	CK1	ATGGAAATTAGAGTGGCAAATAAATATGCTTTAGGAAAAAAATTAGGGAGTGGTTCCTTTGGTGATATATATGTTGCCAAGGATATTGTAACGATGGAAGAATTTGCTGTAAAATTAGAATCAACACGATCAAAACATCCCCAACTATTGTATGAGTCAAAATTATATAAAATATTAGGAGGAGGAATTGGTGTACCTAAAGTATATTGGTACGGTATAGAAGGGGATTTTACTATCATGGTTCTTGATTTATTAGGCCCATCCCTTGAAGATTTATTTACCTTATGTAATAGAAAATTTTCTTTAAAGACTGTCCTTATGACAGCAGATCAAATGTTAAATAGAATTGAATATGTGCATTCAAAAAATTTTATACATAGAGATATTAAACCAGATAAC…	MEIRVANKYALGKKLGSGSFGDIYVAKDIVTMEEFAVKLESTRSKHPQLLYESKLYKILGGGIGVPKVYWYGIEGDFTIMVLDLLGPSLEDLFTLCNRKFSLKTVLMTADQMLNRIEYVHSKNFIHRDIKPDNFLIGRGKKVTLIHIIDFGLAKKYRDSRSHTHIPYKEGKNLTGTARYASINTHLGIEQSRRDDIEALGYVLMYFLRGSLPWQGLKAISKKDKYDKIMEKKISTSVEVLCRNASFEFVTYLNYCRSLRFEDRPDYTYLRRLLKDLFIREGFTYDFLFDWTCVYASEKDKKKMLENKNRFDQTADQEGRVKQN	323	0	null	no	GO_0006468	GO_0006468	GO_0006468,GO_0006468	0	0	0	0	0	0	0	0	0	0	0	0	0	0	0	0	0	0	0	0	0	0	0	0	0	0	0	0	0	0	0	0	0	0	0	0	0
3347	PF3D7_1149300	serine/threonine protein kinase, FIKK family	FIKK11	ATGATTTATATTAAATTACGCTTATATATATTTTGGTTTCTATTTTTAATTCTATTGAATTTGACATTAACAGATAGGAAAATATTTGAATATATAAGATTAATTGATATATATTTTAGAATTTTATATGAGTATAATGGAATAAATAAATTATGTGGTGGAAAATCTTGTAATAAAATATTTGATCAGCGTATATTAGGTGAAGAAGAATGTATTTATAAAGGTGATGATAAAAAAAAAAAAAAAACCAAACTAATAGATATGATTAATTTATGTAAAATATGGAATAAAATTAAAAAGGTAATTTATAAGGATGAAAATATATTAAAAAGTGGAAGCAACTTAAATATAAAAGAAAATAAAAAATTTATTTATAAACTAAATGGGGAAAATACTGGT…	MIYIKLRLYIFWFLFLILLNLTLTDRKIFEYIRLIDIYFRILYEYNGINKLCGGKSCNKIFDQRILGEEECIYKGDDKKKKKTKLIDMINLCKIWNKIKKVIYKDENILKSGSNLNIKENKKFIYKLNGENTGINDNQQYIDELKDNIHSKNIYNWIEGYKSLVKMFGLSNNFSINGVKYSDWKLIPISFIEYNKKKFRVQEMFKTVITSKNDDNKNNISLFIKKIPVDIWLKQFEMMELYNGEYLVNAENYVMEASILAFLNEYYQGFIAPKLYKILYEENYEENNKENMFPPYMFNEKKELNINNLHEFKNFLKERINKNVNGYIVIVSELYGQNVFEYIEKRQKENNNILSDREKKKILYECLKLLIKLHNVGIAHLDISLENILMTENYEFLLCD…	560	1	HMM: MIYIKLRLYIFWFLFLILLNLTLTD, NN: MIYIKLRLYIFWFLFLILLNLTLTD	yes	GO_0006468	GO_0006468	GO_0006468,GO_0006468	0	0	0	0	0	0	0	0	0	0	0	0	0	0	0	0	0	0	0	0	0	0	0	0	0	0	0	0	0	0	0	0	0	0	0	0	0
3735	PF3D7_1238900	protein kinase 2	PK2	ATGGAGAAAAGATATCAGCAATTGTTTAAAGGGAAAAGAATTGATTTCCCTTTAGCAACAGGAGCTGCTTCACATGTATCATTAACATATGATGAGAAGAAGAATCCATACTTATTATGTTGGACATATATATATCAAGAGAAACCAGAATTTACTGTACCTTTGAAAGGTTGTCGTATAATTAATAATATAACAGAAATTGGTCCATGTATTCATATAATTACATCGAATGAAGAGTATCAATTTCAATGTAGAAGTAAAGAGGAGTTTGATGAAATGAGTCAATTTTTTAATATGTTAGGTTATCCAATATTAGGATTTAAGAATGTATATGTATTAAATAAGAAAATTGGTAAAGGTAGTTTTTCTACTGCATATATAGGTACAAATATATTATAT…	MEKRYQQLFKGKRIDFPLATGAASHVSLTYDEKKNPYLLCWTYIYQEKPEFTVPLKGCRIINNITEIGPCIHIITSNEEYQFQCRSKEEFDEMSQFFNMLGYPILGFKNVYVLNKKIGKGSFSTAYIGTNILYGNRVVVKEVDKSKVKESNVYTEIEVLRKVMHKYIIKLISAYEQEGFVYLVLEYLKGGELFEYLNNNGPYTEQVAKKAMKRVLIALEALHSNGVVHRDLKMENLMLENPNDPSSLKIIDFGLASFLNSPSMNMRCGSPGYVAPEILKCASYGTKVDIFSLGVILFNILCGYPPFRGNNVKEIFKKNMRCHISFNTKHWINKSESVKEIILWMCCKNPDDRCTALQALGHQWFLPKLTDMHMTANINELKRNEAIVHKSNDQQDMCKK…	509	0	null	no	GO_0006468	GO_0006468	GO_0006468,GO_0006468	0	0	0	0	0	0	0	0	0	0	0	0	0	0	0	0	0	0	0	0	0	0	0	0	0	0	0	0	0	0	0	0	0	0	0	0	0
3815	PF3D7_1247500	serine/threonine protein kinase, putative	null	ATGTTGAAATTTCGAAGTATTTGTACTACTTTAATCGGTGGCAAGGTTTACAATATTAATGGGAAGACGATAAGAGAAGAGAAATTAATTTCTGAGGGAGCGTATTCATTTGTTTATATGGCGAAGGATTTAAACACGAATCGAGCTTATACTATAAAGAAGACCATATGTCAAGATAAAGAGAAAATAGATATGGCGAATAAAGAAATCAACATTCTTAAAAGTTTACCTCCACATAAAAATATAGTACAATATTATGGTTCCACTATTATTTCTGAGAATAATTATAAAATTGTTATTATGTTGATGGAGTATTGTGAGAGAGGAAATTTATTAAATATTTTTCAAAAAAATAAAGACAAGATTAAAGAAATTCACATTGTAAATATTTTAAAAGAT…	MLKFRSICTTLIGGKVYNINGKTIREEKLISEGAYSFVYMAKDLNTNRAYTIKKTICQDKEKIDMANKEINILKSLPPHKNIVQYYGSTIISENNYKIVIMLMEYCERGNLLNIFQKNKDKIKEIHIVNILKDIITGLCFLHNQEIPIIHRDIKLENILCDKNGVYKICDFCSHSISNSFFPNDLSKSELSNLKEEIERDTTLIYRPPELIDLYSNFEISWKIDIWMVGCILYLLLFKIHPFQNNNFLSIINASFTIPYCTKYSKRIISILLMTLNKNPQKRIDTSTLLFILENYADLKKWFVHIPADIKKRVNQIFEKMNELNMNNKHTDLIEVSHEKLIDVKISSQKYETNLPKSNNNFLKFFTTSNLSGDIFKKKIEKEETKKEIKQVGNKQVSET…	909	0	null	no	GO_0006468	GO_0006468	GO_0006468,GO_0006468	0	0	0	0	0	0	0	0	0	0	0	0	0	0	0	0	0	0	0	0	0	0	0	0	0	0	0	0	0	0	0	0	0	0	0	0	0
4044	PF3D7_1316000	protein kinase, putative	null	ATGAATAAAATGAAAAGTACTAAAATTGAAAACCCAAAATATAAATTAATGAAATTGATTGGGAAGGGTACATTCGGGAAAGTATATTCTGCTATTGATATGTCTACTCAAGAAGCAGTTGCAATTAAAAGATCTCCAAAATGGAGAAATAAAGTTTCAAGGGAAGTAGATTTATTAAAAAAAATGAATGGTAGTACAAATATAGTTAAAATAAAGTCTGTATTTTATACAACTACCAAAAAAGGATATAGAATTCAAAACATTGTTTTTAAATATATGACATATAGTTTGGGAAGATATATAAGAATGAAAAAACAAGAAAAGCGTGAAAATAAATATGATAGAATTAATCCAGCTGACTTAAAAAATATTATTTATCAAATATGTATAGGGATAAAA…	MNKMKSTKIENPKYKLMKLIGKGTFGKVYSAIDMSTQEAVAIKRSPKWRNKVSREVDLLKKMNGSTNIVKIKSVFYTTTKKGYRIQNIVFKYMTYSLGRYIRMKKQEKRENKYDRINPADLKNIIYQICIGIKDLHKNDFAHRDLKPDNILIDLDSSNIKIEICDLGSAKKVQRNIISIPYICSRWYRAPELLCGSMFYTTEVDLWSLGCIIFELINLCPLFPGKFKKDEYSEECSQIINLIEVIGSPQMSFFENIKDHTSKKNTLLIKELCELNIKPLCWDEILGNILEIEEKELINIIDGLLKWNPNERLNIDAVLSNPYFSTLNK	328	0	null	no	GO_0006468	GO_0006468	GO_0006468,GO_0006468	0	0	0	0	0	0	0	0	0	0	0	0	0	0	0	0	0	0	0	0	0	0	0	0	0	0	0	0	0	0	0	0	0	0	0	0	0
4269	PF3D7_1338900	serine/threonine protein kinase, putative	null	ATGAAATTGTCCTCTTGCATAACATATGTTTCAATATTGTGTAATTTAATAATAGTTGGTCGTTTTTTGTATTCTTCATTTTTGTTTTTGTTTAGTGAAAATATTTTAAATTATTTTGAAAGGAATAATCCTTTTATTCATAGGAAAAAATATCTTATTCATAAAAGGACCCAACCAATTTTGCATTCTTCAAAATATAGACATCCATATGAAGGTTCATTCAAAAAGAAGGTAATTTATGACAATAATTATTTTGGAATAAGAAAAGAAATAAACTTGGTTCATTATAATAAATTCTCTTTTTATGAATATTTATTTTTGCTTCTTTTTTACAAAAAGGGTATTCACAAAATTTTTGATTATGTTTATGTATATTATTATAAAACAAATATATTTGAT…	MKLSSCITYVSILCNLIIVGRFLYSSFLFLFSENILNYFERNNPFIHRKKYLIHKRTQPILHSSKYRHPYEGSFKKKVIYDNNYFGIRKEINLVHYNKFSFYEYLFLLLFYKKGIHKIFDYVYVYYYKTNIFDSLYNYNNEYVKNNLLFAFAKDIKKYFLIFNSNIKKLDVQLAILIKKKRRKKKKRIYEQKHLASYSSKLERTTNGNKYINTYDGNEEENIFVHEEINTAYGNYEGKPVLNSKYCLIKKIKNILKKKTLRKSNINKLDVIHLPIDDESVENKNNVELNNYVCKSCIIDIEEKSLYALKIREEEKEKDSNNISLYKEKSRHIQIYYDYEDMQEYIMKKKKKNEKNEKNEKKKKKKIMMRNFNKSISGTKPIINTPYYEPLKNNYQMINF…	931	1	HMM: MKLSSCITYVSILCNLIIVGR, NN: MKLSSCITYVSILCNLIIVGRFLYSS	yes	GO_0006468	GO_0006468	GO_0006468,GO_0006468	0	0	0	0	0	0	0	0	0	0	0	0	0	0	0	0	0	0	0	0	0	0	0	0	0	0	0	0	0	0	0	0	0	0	0	0	0
4368	PF3D7_1349300	tyrosine kinase-like protein	TKL3	ATGAGTGAACATTCATCTGGGGTATCAAGAAAGCTGTTTTGTAATTCTGATAAATTATTTTATGACAATTTTAGGAATTTGGATGATCGTCTTAATTTGAATAATAATTTTAATGAAAATAGATATGAAGAAATATACAATAAAAAATATTTGAGAAATAATCGGAGATTTAAAACGGAGCCTCCGAAACATTTATATGAAAATGAAAGTGAACAATCTTATTCTTCACTTTTTCATAACATACTTAGAAGTATATCAAAGAATATAAGAAATGATGAAAAAGAGGAATCCAGCGATAATAATAATTGTGATGATGATAATGATAATAATAATGATGATGATGATAATAATAATCAAAGTGACTCCATTCCTAATAATTCTGAAAATTTTAATTATGAT…	MSEHSSGVSRKLFCNSDKLFYDNFRNLDDRLNLNNNFNENRYEEIYNKKYLRNNRRFKTEPPKHLYENESEQSYSSLFHNILRSISKNIRNDEKEESSDNNNCDDDNDNNNDDDDNNNQSDSIPNNSENFNYDDNSCCEISPYDEISKKTKRVHNKIHKNEDGEYYKNVLYNNNNLSKENQINNICSSINKTQRTLKRIDTNINETLNNVKYIKMVNSDIISDVFLKNNVKSLIVYDTGGIDIELIENENPEFLYHTYTGNRISNIYYEYDDCIKNKDTYKNEEKKKKKNTFNSSLLYRENYIFKKEHELNYCYKNKDDNKKKIKNNPSEKNQIMNYSSDICSNSDSKKLFTKNKKQENVINKNIYYNNPSDYNILNNEVNYNKNTVHNTNLSKDTCEH…	1807	0	null	no	GO_0006468	GO_0006468	GO_0006468,GO_0006468	0	0	0	0	0	0	0	0	0	0	0	0	0	0	0	0	0	0	0	0	0	0	0	0	0	0	0	0	0	0	0	0	0	0	0	0	0
4440	PF3D7_1356800	serine/threonine protein kinase, putative	ARK3	ATGAAGGATTATTATATGGACAAGATTAAAAAGAATATTAATGAAATAAAGAAATATCAAAATATAAATATATTAGAAAAAACAAATGAAACTAATAATGCATTTTTTTATGAAAATAAAAATGTTACGTTGAAATATAATGAAGAACAGAAATATAAAAAGACAGAGGATATAATCAGTAATATATCAACGGATAAAAAGGATATTAAAAATAATAACTGTAATAATATATCTAATGATGAATATGTGAGAATAGAAAATGGACCTAAAAATAATTATGTCTCATATAACAATAACAAAATAATTAATAATGATAATGAAAAATATGACAATATATATAATAATTATGGATCCGTCATACATAAATTAAATGTACAAGATATGAATAATATACCTAAT…	MKDYYMDKIKKNINEIKKYQNINILEKTNETNNAFFYENKNVTLKYNEEQKYKKTEDIISNISTDKKDIKNNNCNNISNDEYVRIENGPKNNYVSYNNNKIINNDNEKYDNIYNNYGSVIHKLNVQDMNNIPNQNYNNNVVISTKKNKNDVIYNIPYNTNSFIDTKQNMNINNDVGTKYYLDNNKNGYIMNENINYDIENKMTNTLNDINKCVHVNRNDFSYYLNIKDGNKIEDDNATYTHYINNSNIHQYDNTTNNTFYNKKCDEQYYDKCESGTRINKINEKYINEHFNNNGSDGDNIYFHKLLSHKNSNEKKYVFQEKIEKRNNDKYKYCYNDKDKDISSYMVNKENYNGNKDLDILNNYYQMKNNLLSNKNNIYIINSNNQKRDLSLQNKEDEKI…	4044	0	null	no	GO_0006468	GO_0006468	GO_0006468,GO_0006468	0	0	0	0	0	0	0	0	0	0	0	0	0	0	0	0	0	0	0	0	0	0	0	0	0	0	0	0	0	0	0	0	0	0	0	0	0
4819	PF3D7_1423600	calcium-dependent protein kinase, putative	null	ATGGGTAACGCTTTAAATAAATTACTAAAACATTATAGAAACGTCGAAAAAAAAAAAAATGAATATAAATTTGGTAAGATACTTGGATGTGGATCCTTTGGGGTTGTGAGGGAATGTATTAACAAAATGACAAAAGAAGTGTATGCAGTGAAAATAATTAAGAAAAAGAAAAAGCACAAAAAGAGTTACAATTTTGAGAAAATGGTAAAAAATGAGATTAAGTATTTATCTATAATGAGTCATGAAAATATTATTAAGTTCAAAGACTTTTTTGAAGATAAAAATAAGTTCTATATAGTTTTAGAAAAATGTGAAGGGGGAGAATTATTTTATAAAGTTGTTAAAAATAAATGTTTGATGGAGAGTGAATCAGCTTTAATTGTCAGACAGATTTGTTGT…	MGNALNKLLKHYRNVEKKKNEYKFGKILGCGSFGVVRECINKMTKEVYAVKIIKKKKKHKKSYNFEKMVKNEIKYLSIMSHENIIKFKDFFEDKNKFYIVLEKCEGGELFYKVVKNKCLMESESALIVRQICCALQYLHSNNIIHRDIKAENFLFKNKNTKNIKLIDFGMAKRVNCEYLTELCGSPHYISPELIRKKYTMSSDIWALGVMVFFMLTGKYPFEGKNTPKVVDEILNKNINWKGKEFSSLSIEAVDFLKRLLERNEKKRLTAYQALHHPWITSQVG	284	0	null	no	GO_0006468	GO_0006468	GO_0006468,GO_0006468	0	0	0	0	0	0	0	0	0	0	0	0	0	0	0	0	0	0	0	0	0	0	0	0	0	0	0	0	0	0	0	0	0	0	0	0	0
4889	PF3D7_1431500	mitogen-activated protein kinase 1	MAPK1	ATGCCTAAAGAAGATTGCAAGACAGAAAAGAGTATAGACAGTATTGATGAGAATGTATTAAAAAAATATGATATATTAAAAAAAGTTGGTAAAGGAGCTTATGGTGTTGTATTTAAAGGTAGATGTAAGAAAAATAAGAACATTGTAGCTGTGAAGAAAATATTTGGAGCTTTTCAAAATTGTACAGATGCTCAAAGAACGTTTAGAGAAATAATATTTTTATATGAATTAAATGGACATGATAATATAATAAAATTAATGGATGTTATAAAAGCAAAGAATGATAATGATATATATCTTATTTTTGATTTCATGGAAACCGATTTACATGAAGTAATAAAAGCAGATTTATTAGAAGAGATCCATAAGAAATATATAATATATCAATTATTAAGAGCT…	MPKEDCKTEKSIDSIDENVLKKYDILKKVGKGAYGVVFKGRCKKNKNIVAVKKIFGAFQNCTDAQRTFREIIFLYELNGHDNIIKLMDVIKAKNDNDIYLIFDFMETDLHEVIKADLLEEIHKKYIIYQLLRALKYIHSGGLLHRDIKPSNILVNSECHIKVADFGLARSISTHVNENKVPILTDYVATRWYRAPEILLGSTHYTEDVDMWSLGCIMGELLCGKPLFTGNSTMNQLEKIIQVIGKPNKKDIEDIRSPFAEKIISSFVDLKKKNLKDICYKASNESLDLLEKLLQFNPSKRISAENALKHKYVEEFHSIIDEPTCRHIITIPINDNTKYRVNFYRNVVYFVIMRRNKFHSNVLNQGESKKEEKKDRYYRRDKDKKKCICENNKVHMEDKE…	914	0	null	no	GO_0006468	GO_0006468	GO_0006468,GO_0006468	0	0	0	0	0	0	0	0	0	0	0	0	0	0	0	0	0	0	0	0	0	0	0	0	0	0	0	0	0	0	0	0	0	0	0	0	0
4986	PF3D7_1441300	serine/threonine protein kinase, putative	null	ATGACTACAACGGATACCTGGAAAGTTGAGTGGGACAATGAACTTCGCCAGCTCCCAAACGTTGAGTCCGTAACATGTTTTGATTTACAACTAACGGAAAATGTATTTCTGATATGGCAGTTTTTAAAACTTTATCTATCTACGAGCCCCCAAGTTAGAAGTATCATAGACTTCATTGCAATTAAAAAAGCTCAGAGCTTACAATGGGGTGATCACATTGATAGTGTAATGTCAAGTGGGCTAAGGAAAGGACAAGAATTATTTCATGTATTTTTGTCGAATGGAAAAAAAATTCAAACAACTTATTCAAAAAAAAAATTATGTGATAGATTAGAATATTATCACATTAAGAATTATATCATTTTAGAAAAAATAAATACAGGTTCTGTGGGTCAAGTT…	MTTTDTWKVEWDNELRQLPNVESVTCFDLQLTENVFLIWQFLKLYLSTSPQVRSIIDFIAIKKAQSLQWGDHIDSVMSSGLRKGQELFHVFLSNGKKIQTTYSKKKLCDRLEYYHIKNYIILEKINTGSVGQVHVALDKSTDTFVAAKAIDKSTVQGDIGLFEKLKDEIKISCMMNHPNVVKTLNILETKDKIIQIMEYCDAGDLISYVRNKLYLDEVSAQYFFRKIVEGLKYMHKNNIAHRDLKPENIFLCKIQISQKEKTLIRVGKLPSCIEYDLKIGDFGACCINEKNKLHHDIVGTLSYAAPEVLNCNNNNGYNSEKADIWSLGIILYAMLFGLLPYDSEDKDVKEAYNEIIKKKIVFPKNRVNKFSTSVRSLLLAMLNINPQNRLSLDEVMKHE…	2247	0	null	no	GO_0006468	GO_0006468	GO_0006468,GO_0006468	0	0	0	0	0	0	0	0	0	0	0	0	0	0	0	0	0	0	0	0	0	0	0	0	0	0	0	0	0	0	0	0	0	0	0	0	0
5003	PF3D7_1443000	serine/threonine protein kinase	SRPK2	ATGAGTAAGACAGAATATGATATTCTTTCACTTGTAAATGCAGTTGAAGAATTTAGCAAATATTGTTCAGAATATAAGAAGAGACACCTAACGAATTATATACAATCTTGTTCTGTTAAAAACCAAATTAATAACAATGAAGAGGTAATATTTAAAACAACCTTACAAGATTTTATGAACAAGGTTAATATGTTAGGTAATAATATTTTGCAAATTGAAAAAATAAATAAATGTCAGATACCTGAGAATATATTATATGAAAAAAATGGAAATAAAATGATATATGATCCAAAACATTACAATGAAGACAAATTAAATAATGAAAATATATTGGAAGATAAAAATAAAAGAAATATTTGCGAACACATAAAATCCAAAATAAATGACAAAAACTTTGTA…	MSKTEYDILSLVNAVEEFSKYCSEYKKRHLTNYIQSCSVKNQINNNEEVIFKTTLQDFMNKVNMLGNNILQIEKINKCQIPENILYEKNGNKMIYDPKHYNEDKLNNENILEDKNKRNICEHIKSKINDKNFVQNNDYGKNIKIINNINEQNLLMKDKNDYTNISENLYMRKISTEYTSSDRSSEDNVLLHNINNVLVKYVSGLDYTLNIRRISRKDLIEEIKQFYIIHNNNIQLNDYSTYLSDEVINILKQKKDNIKCLDKNNLFIIEKNVDFYKNNFLPFFYIPCNYLFIKNYCNDNERCLETTYDTNDEKNSTTENSYILSSPNHMYNTNTNSYNSHSNSIIARNTSSNKCNSPIFGINERNSSPNFGIFNESIKNHKDQYNMDPNYLIMRYNLNE…	1268	0	null	no	GO_0006468	GO_0006468	GO_0006468,GO_0006468	0	0	0	0	0	0	0	0	0	0	0	0	0	0	0	0	0	0	0	0	0	0	0	0	0	0	0	0	0	0	0	0	0	0	0	0	0
5072	PF3D7_1450000	serine/threonine protein kinase, putative	null	ATGGGGTCAACAATAAGTAAAAGAAAAAACAATACAGATAAAAATGTGAAGGACGAATCAGTTGAAAATAAGAGACAAAAAAAAAACGAGGAAAATGATTCAAATTTAGAATTTATTAAAAAATATAAAATAATTAATAAAATTGGAGATGGTAATTTTTCCAAAGTATTTTGTTGTCGAGGAGAGAATAAAAAAAAATGTGCAATGAAGCTGATGTGCTGTCCACTCAAAAAAACATCTCATTATAATTGCTTTAAGAGAGAGTTATTTATTATGAAAACGATAAATAATAAACATCCGTACATTGTAAAAATACTTGATTATCATGAGAAAATATGGAAAAAATATTATATTGTAAAATTAATACTGGAATATTGTGAAGGAGGGAATTTATTTGAG…	MGSTISKRKNNTDKNVKDESVENKRQKKNEENDSNLEFIKKYKIINKIGDGNFSKVFCCRGENKKKCAMKLMCCPLKKTSHYNCFKRELFIMKTINNKHPYIVKILDYHEKIWKKYYIVKLILEYCEGGNLFEYIKINGSCTHSEARVIIIKLTKTIQYINSLKIMHRDIKPENILLRTKDNIKSVVLSDFGLAKITPSNQSVVKSRSVCGSDFYLAPEIIKNKEYGIKIDIWSLGVLIFFIITGKVPFTGKNANELYNNILKANIPELLSKEKSLNIQPGLKNLLENILVHDPDQRFSCADILNHRWIRGTLTSCEFKIFNSASYIKKLRLDKKKASYDEEAKDNQIKDKSFENEKDSFANKKKRYTFFLKKITN	376	0	null	no	GO_0006468	GO_0006468	GO_0006468,GO_0006468	0	0	0	0	0	0	0	0	0	0	0	0	0	0	0	0	0	0	0	0	0	0	0	0	0	0	0	0	0	0	0	0	0	0	0	0	0
267	PF3D7_0213400	protein kinase 7	PK7	ATGAAGGATATTTTATCTAATTATTCAAACCTCATATATCTTAACAAATATGTGAAAGAAAAGGATAAATATATAAATGACTATAGAATTATCAGAACATTAAATCAAGGCAAATTCAACAAAATAATTTTGTGTGAAAAGGATAATAAATTCTATGCCTTGAAGAAATATGAGAAAAGCTTGTTAGAAAAAAAAAGAGATTTTACAAAAAGTAATAATGACAAGATTTCAATAAAGTCCAAGTATGATGATTTCAAAAATGAGCTACAAATAATAACAGATATAAAAAATGAATACTGTTTAACTTGTGAAGGTATCATAACAAATTATGATGAGGTATATATAATATATGAGTATATGGAAAACGATAGTATTTTAAAATTCGATGAATACTTTTTT…	MKDILSNYSNLIYLNKYVKEKDKYINDYRIIRTLNQGKFNKIILCEKDNKFYALKKYEKSLLEKKRDFTKSNNDKISIKSKYDDFKNELQIITDIKNEYCLTCEGIITNYDEVYIIYEYMENDSILKFDEYFFVLDKNYTCFIPIQVIKCIIKSVLNSFSYIHNEKNICHRDVKPSNILMDKNGRVKLSDFGESEYMVDKKIKGSRGTYEFMPPEFFSNESSYNGAKVDIWSLGICLYVMFYNVVPFSLKISLVELFNNIRTKNIEYPLDRNHFLYPLTNKKSTCSNNFLSNEDIDFLKLFLRKNPAERITSEDALKHEWLADTNIEDLREFSKELYKKRKKL	343	0	null	no	GO_0006468	GO_0006468, GO_0007165	GO_0006468,GO_0006468,GO_0007165	0	0	0	0	0	0	0	0	0	0	0	0	0	0	0	0	0	0	0	0	0	0	0	0	0	0	0	0	0	0	0	0	0	0	0	0	0
1596	PF3D7_0715300	calcium/calmodulin-dependent protein kinase, putative	null	ATGGTTCTGAAAAAAACTCCCTTTTCGTTCTTATATGAAATAGGATATGCAGAAAAGACCGATAGAAATATAAACGATATAGGGAGAAATAATAATTTAGACTTATACGAAAACATACAAGAATATGAGATTCCAGAACTAGGAAACTTTCGAATAGTAAGCATTTTATTAAAAGGTTTTTCAAGTACAGTATGTTTATGCCAATGGATTCTTGACTTGAATGAAACATTAACATTATGTGATTATGTAAGATATATAAATAGAAATATTTTAAATAATAATATACAAATCGTAAAAGGGGACCACATGGAAAAAAGAGAAGCCATTTCTTTATGGCAAGATACAACAAATATAAGATCAAAGACAAATATGAATACATGTATTTATCCTCACATTTTT…	MVLKKTPFSFLYEIGYAEKTDRNINDIGRNNNLDLYENIQEYEIPELGNFRIVSILLKGFSSTVCLCQWILDLNETLTLCDYVRYINRNILNNNIQIVKGDHMEKREAISLWQDTTNIRSKTNMNTCIYPHIFNNAYVNVNMDVHLNNVHNLNQGLEGVEYIYPSGKPNIYNNIININNNLEGYKNKREETKEIAHINMFTHSDIIRNNEITNHYDQIYEPYNIMKRKNKDTYNIQIMNLVLKIKHKGLYYKIKEIEQLREEIEIHKDLKHTNILQIILCAEDENDIWIFLEYSSIGTLYSYVGFNILQEKQVQIIICQILYALYYLHIKGIIHCDIKPQNLLLFNFDQSICIQNNFLLYDHTLNHLNMKKLNFQKLFSHNNDHKTNQQNNVFNNIVKI…	517	0	null	no	GO_0006468	GO_0006468, GO_0007165	GO_0006468,GO_0006468,GO_0007165	0	0	0	0	0	0	0	0	0	0	0	0	0	0	0	0	0	0	0	0	0	0	0	0	0	0	0	0	0	0	0	0	0	0	0	0	0
1634	PF3D7_0719200	NIMA related kinase 4	NEK4	ATGAATAAATATGAAAAGATTAGAGATATAGGAAAAGGAAATTATGGAAATACAATACTTGTTAGAGATCGAAAAAATGACCATTATGTAATGAAAATAATAAACATTTCACAAATGTCTCAGAAAGAAAAGAGGCAATGTTTAAAAGAAGTTGAATTATTATCCAAATTAAATCATCCTTTTATTGTAAAATATATTGAAAGTTATATTGAAGGGGATACACTTAGAATAGTTATGAAGCACTGTAAAGGAGGTGATTTATATCATTACATCCAAAATAAAAAGAAACAAAATACGCCTATAAAAGAAAAACGTATACTCATCTGGCTAACTCAAATATTAACTGCTCTTAAATTTCTTCACTCAAATCATATTCTTCATAGAGATATGAAGTCTCTA…	MNKYEKIRDIGKGNYGNTILVRDRKNDHYVMKIINISQMSQKEKRQCLKEVELLSKLNHPFIVKYIESYIEGDTLRIVMKHCKGGDLYHYIQNKKKQNTPIKEKRILIWLTQILTALKFLHSNHILHRDMKSLNILIDSDKRVRLCDFGISKVLENTLDYANTLIGTPYYLSPELCKDKKYSWPSDVWATGCLIYELATFRTPFHSTKGIQQLCYNIRYAPIPDLPNIYSKELNNIYKSMLIREPSYRATVQQLLVSDIVQRQLKLLIEEKIREKQSMKKPLKEKPAIENENSGANEQEVKTLLLDVVDT	310	0	null	no	GO_0006468	GO_0006468, GO_0007165	GO_0006468,GO_0006468,GO_0007165	0	0	0	0	0	0	0	0	0	0	0	0	0	0	0	0	0	0	0	0	0	0	0	0	0	0	0	0	0	0	0	0	0	0	0	0	0
2932	PF3D7_1106800	protein kinase, putative	null	ATGGGCAACACCCTTGATAGTAACAAACCCAAAAACTTTGTTACTTACGCAGATTATAAATATATAGGAAAATTAAATAATAAAAACGAACATCATGGGATAGGTATCATTTTATATAATTCTGGAGAATCATTTTATGGTTCCTTTATAAACGGGAAAAAAGAAGGCAAAGGGATATATATTGATAAGAATTTAACAAGATATATAAATACTTGGGTTGATAATAAAGTTTTCGGAAAAGTAAAAGTTGTTCCATATAATAGTAATAGAGTATATTATTTTTATTACAAAAATTATATGATAGAGAAATGTATATATTTTGATAATAATATAAATAATAAAGAGTCTCATCATAAAAATAATATTTATAATAACTACGATAATAATTCGTATAATAAT…	MGNTLDSNKPKNFVTYADYKYIGKLNNKNEHHGIGIILYNSGESFYGSFINGKKEGKGIYIDKNLTRYINTWVDNKVFGKVKVVPYNSNRVYYFYYKNYMIEKCIYFDNNINNKESHHKNNIYNNYDNNSYNNNSCDDEEKRKYPIGVTKFKEDLSNYIHSTHIMKKNNKLFNKNDNEYNIFSSSLSYSSDSENINLLDILKKKKNKKNKKNKKKKNKKTKNTQILSCTQHKMYEHNMNESNFTKKDNVNCEHTDKMNISLHEKNDKKNEKKNEKKNKKKKLFKYFSNNIENLIIENYQTWSLREVIQWLMLCNVPVKWLISFYKNNITGDKLKYININTIRNELGIIAYGHAIKILQLIKNLQVMAYNKKFNNLIQIEEYKNYIRQKENTNKNIKKGK…	1501	0	null	no	GO_0006468	GO_0006468, GO_0007169	GO_0006468,GO_0006468,GO_0007169	0	0	0	0	0	0	0	0	0	0	0	0	0	0	0	0	0	0	0	0	0	0	0	0	0	0	0	0	0	0	0	0	0	0	0	0	0
5027	PF3D7_1445400	protein serine/threonine kinase-1	CLK1	ATGACTGAATTGAATATTATTGATAATAATGAAAAACATAGTAAATATAAATTATATAAATATTGTAGAAATTATATAAATGATTTTAAAAATAAATATATGATGGGTTATTCATCGAATTTGTATAAAAATAGTCCCAACAAATATTACTACGATACGCGAAATAATAGTAATAATAATAATAATGGTTATTATTACCATAATTATAATAATGGTTATCAAATACGAAATAAAAGAAATCGTAGTTTTGAGACTGTAAGTAATTCAAAAAACAAACATAAAATTTCAAAAAAATATAAATATAATAATGAACCCCATGAAAGTTTTAGAGACTATGATTACAAAAGTAAACCTAGTTATTCTTCTGTAAAAAAAATTTATGATAGAGAACAGAAGCGT…	MTELNIIDNNEKHSKYKLYKYCRNYINDFKNKYMMGYSSNLYKNSPNKYYYDTRNNSNNNNNGYYYHNYNNGYQIRNKRNRSFETVSNSKNKHKISKKYKYNNEPHESFRDYDYKSKPSYSSVKKIYDREQKRYNKMFVESRYNENHKNKYINNYNLSRKRNYYSYKKKIYTDRRNFDTHFGQGNIIYNNEYYLINDGSSLNKKRLHYAKGSFRSRSRSKNYNTYNLEKSKKMKYSSRHNIYRYHNGNKNKSISRWEDNYTYKDIYQPSSSLHKYKRRSNFTRDDNSIKSKMYYENKKTDHLYSYEDKYYNKYDDKYDDKYDDKYDDKYDDKYDDKYDDKYDDKYDDKYDDNYDDKYDYGEEEHRQEYYKKKKISFNNSTNNKSSINYDDVKRELKKRK…	881	0	null	no	GO_0006468	GO_0006468, GO_0045595	GO_0006468,GO_0006468,GO_0045595	0	0	0	0	0	0	0	0	0	0	0	0	0	0	0	0	0	0	0	0	0	0	0	0	0	0	0	0	0	0	0	0	0	0	0	0	0
1298	PF3D7_0615500	cdc2-related protein kinase 5	CRK5	ATGTTTGGAATTACATTAACAAAGTGCAAAATATACTTCAATAATATATATTCGACCGTATCTCTCGAAGAAAAATTAGGGGGGGGCACCTATGGTGACGTGTACAAAGGGAAAGTAATAAAATATAATAATAATAATAATAATAATGATTTATATCAAAATACAAATTATTTACCTTATGATTATTATACTGATGAATTTGTTTTTTTTCGTAAAAATGTTTATGCCATAAAATTTTTTCGAGACGATTTAAGGACCATAAATGAAGAAGGTATAAGTTGTACAACATTAAGAGAATTAAGCTGTTTAAAAAATATTGGGAGGCATCCTAATATCCTTCGTTTAATAGATGTTACTATAGATAGACAAAAGCTTATAAGTGAATATATAAATAGACAG…	MFGITLTKCKIYFNNIYSTVSLEEKLGGGTYGDVYKGKVIKYNNNNNNNDLYQNTNYLPYDYYTDEFVFFRKNVYAIKFFRDDLRTINEEGISCTTLRELSCLKNIGRHPNILRLIDVTIDRQKLISEYINRQILQHYTSNYHHHHHSKLDITPLAADQKFIFAAYEYCDGGDLKKLIQKTKISDDQAGLNLKEAKWLSFQLLNGLAYLHNNKMCHRDLKPENVMLQETSNHKYLLKIGDLGLCRELKNDGDMTPTVCTIYYRPLEVLLSKFELSNKHHHKSHATNHRRDDNDDDEDEDDDDDEDEDDDDEEEEDDDVDENVEVKLHGRNKTSSNNKNNNNKNHNSNINYNNHNWSRRKNKMKKKKKKKKKKKEQDDDYYNKDFQYGLNVDIWSAACII…	705	0	null	no	GO_0006468	GO_0006468, GO_0051726	GO_0006468,GO_0006468,GO_0051726	0	0	0	0	0	0	0	0	0	0	0	0	0	0	0	0	0	0	0	0	0	0	0	0	0	0	0	0	0	0	0	0	0	0	0	0	0
2604	PF3D7_1014400	MO15-related protein kinase	MRK	ATGGAAAATAATTCAACAGAAAGATATATATTCAAGCCTAATTTTTTAGGTGAGGGTTCCTATGGTAAAGTTTATAAGGCATATGATACAATTTTAAAAAAAGAAGTTGCAATAAAGAAGATGAAATTAAATAAGATAAGTAATTATATTGATGATTGTGGTATAAATTTTGTTTTGTTAAGAGAAATTAAAATAATGAAGGAAATTAAACATAAAAATATTATGAGTGCTTTAGATTTGTATTGTGAGAAAGATTATATAAATTTAGTAATGGAAATAATGGACTATGATTTATCTAAGATAATAAATCGAAAAATTTTTCTAACAGATAGTCAAAAAAAGTGTATACTTTTACAAATTTTAAATGGTCTAAATGTATTACATAAATATTATTTTATG…	MENNSTERYIFKPNFLGEGSYGKVYKAYDTILKKEVAIKKMKLNKISNYIDDCGINFVLLREIKIMKEIKHKNIMSALDLYCEKDYINLVMEIMDYDLSKIINRKIFLTDSQKKCILLQILNGLNVLHKYYFMHRDLSPANIFINKKGEVKLADFGLCTKYGYDMYSDKLFRDKYKKNLNLTSKVVTLWYRAPELLLGSNKYNSSIDMWSFGCIFAELLLQKALFPGENEIDQLGKIFFLLGTPNENNWPEALCLPLYTEFTKATKKDFKTYFKIDDDDCIDLLTSFLKLNAHERISAEDAMKHRYFFNDPLPCDISQLPFNDL	324	0	null	no	GO_0006468	GO_0006468, GO_0051726	GO_0006468,GO_0006468,GO_0051726	0	0	0	0	0	0	0	0	0	0	0	0	0	0	0	0	0	0	0	0	0	0	0	0	0	0	0	0	0	0	0	0	0	0	0	0	0
5234	PF3D7_1466100	protein phosphatase containing kelch-like domains	PPKL	ATGAATAATGGGTCGTTTAAAGAAACAAGTGTTTGTAGAAAAGAAAAACAAAAAGGAGACATTCCTGCTCCTCGTTTTGGACACACTGCTACATACTTAGGTAATAACAAAGTTGCTATATTTGGCGGAGCTATTGGGGATGCAGGAAAATATAATATAACAGATGATATATATTTATATGATTTAACACAAAACAAATGGAAAAAGTTAATAACAGAGAATACACCATCTGCTAGAGCGGCCCATGCAGCTGCTTGCGTGGATGAACAACAATTGGTTATATATGGAGGAGCTACCGGTGGTGGTTCCTTATCTTTAGATGATTTGTATATATTAGATTTAAGAAAGGAACAAAAATATACATGGATGACAGTACCAACAAAAGGTGTAACTCCTGGG…	MNNGSFKETSVCRKEKQKGDIPAPRFGHTATYLGNNKVAIFGGAIGDAGKYNITDDIYLYDLTQNKWKKLITENTPSARAAHAAACVDEQQLVIYGGATGGGSLSLDDLYILDLRKEQKYTWMTVPTKGVTPGRRYGHVMVYSKPNLIVFGGNDGQNTLNDVWYMHVEMPPFEWVRVIIPNTCKVPPQRVYHSADMCKEGPASGMIVIFGGRSAENKSLDDTWGLRQHRDGRWDWVEAPIKKGSPPEARYQHTSVFIGSKIFILGGRNDNGCAVPLSTALYNTETIEWVTLPSISKFRHTSWVYKYTIYTFGGFSHQTQQYPTNELECLECFNLLSSLNSLDSEKKKSIKQSSLKQKQLTNDNLKHSSSDLRNVNSYNLNSQDVINTQQHNISTNNQFN…	889	0	null	no	GO_0009742	GO_0006470	GO_0009742,GO_0006470	0	0	0	0	0	0	0	0	0	0	0	0	0	0	0	0	0	0	0	0	0	0	0	0	0	0	0	0	0	0	0	0	0	0	0	0	0
2989	PF3D7_1113100	protein tyrosine phosphatase	PRL	ATGAAGAGTTTGGAGAATAACGAAATGCATAACTTGTGTCCAATACATTATTATTTTAACGGGAGAGATTATAATAGTGATACAATAATAAATAATGTAAATATAAAATATTTCAATATGGATAATTGTTTAGGGAATGCTAATCTTCATATGGATTATTTAAATCCTGTATTAAACCACCCAACTAAAATAGAACATGGAAAAATAAAAATTTTAATATTAGATGCACCTACAAATGATTTATTACCCTTATATATAAAGGAAATGAAAAACTATAATGTAACAGATTTAGTACGTACATGTGAAAGGACATATAATGATGGAGAAATTCAGGACGCTGGCATTAATGTCCATGAACTTATTTTTCCTGATGGGGATGCCCCAACAGAAGATATAGTA…	MKSLENNEMHNLCPIHYYFNGRDYNSDTIINNVNIKYFNMDNCLGNANLHMDYLNPVLNHPTKIEHGKIKILILDAPTNDLLPLYIKEMKNYNVTDLVRTCERTYNDGEIQDAGINVHELIFPDGDAPTEDIVSNWLNIVNNVIKNNCAVAVHCVAGLGRAPVLASIVLIEFGMDPIDAIVFIRDRRKGAINKRQLQFLKEYRKKKKKKNCLRKCHFM	218	0	null	no	GO_0016311, GO_0006470	GO_0006470, GO_0018342	GO_0016311,GO_0006470,GO_0006470,GO_0018342	0	0	0	0	0	0	0	0	0	0	0	0	0	0	0	0	0	0	0	0	0	0	0	0	0	0	0	0	0	0	0	0	0	0	0	0	0
2674	PF3D7_1020900	ADP-ribosylation factor	ARF1	ATGGGTTTATATGTAAGTAGGTTATTTAATCGTTTATTTCAAAAAAAAGATGTACGTATTTTAATGGTTGGATTAGATGCTGCTGGAAAAACTACAATATTATATAAAGTAAAACTTGGTGAAGTTGTTACGACTATTCCAACAATAGGTTTCAATGTTGAAACTGTCGAATTTCGTAACATTTCATTTACCGTATGGGATGTAGGAGGACAAGATAAGATCCGACCTTTATGGAGACATTATTATTCCAACACAGACGGATTAATATTTGTCGTAGATAGTAATGATAGAGAAAGAATAGATGATGCTCGTGAAGAATTACATAGAATGATAAATGAAGAAGAATTAAAAGATGCTATAATTTTAGTCTTCGCTAATAAACAAGATTTACCAAATGCT…	MGLYVSRLFNRLFQKKDVRILMVGLDAAGKTTILYKVKLGEVVTTIPTIGFNVETVEFRNISFTVWDVGGQDKIRPLWRHYYSNTDGLIFVVDSNDRERIDDAREELHRMINEEELKDAIILVFANKQDLPNAMSAAEVTEKLHLNTIRERNWFIQSTCATRGDGLYEGFDWLTTHLNNAK	181	0	null	no	GO_0006886, GO_0015031, GO_0007264	GO_0006471	GO_0006886,GO_0015031,GO_0007264,GO_0006471	0	0	0	0	0	0	0	0	0	0	0	0	0	0	0	0	0	0	0	0	0	0	0	0	0	0	0	0	0	0	0	0	0	0	0	0	0
4993	PF3D7_1442000	ADP-ribosylation factor, putative	null	ATGGTATTGTTAAAAATTCTAAAGAAAATAAAAGATAATAAAAGGAATTTAAGAATACTAATATTAGGGTTAGATAATGCTGGGAAAACAACTATAATAAAAAGATTATTAGGTGAAGATATTTATAGTGTTAGTCCAACATTTGGATTTAATATTGAAACATTAGAATTTGGTAATAATATTCTTAACATATGGGATATAGGAGGACAAAAGAGTATTCGTCATTTTTGGAAAAATTATTATGAAGATGTAGATGGTATTATTTTTGTTGTTGATAGCACGGATTTGTTTCGATTACAATTATGTTCATTTGAATTGAAACAAATATTAAAGGAGGAAAGATTATATGGATCTACTTTATTAATTTTATCAAATAAAGTGGACATTGATAAATCTCTA…	MVLLKILKKIKDNKRNLRILILGLDNAGKTTIIKRLLGEDIYSVSPTFGFNIETLEFGNNILNIWDIGGQKSIRHFWKNYYEDVDGIIFVVDSTDLFRLQLCSFELKQILKEERLYGSTLLILSNKVDIDKSLTINQIVEILKLNEMNMDRHWCINECSAFSGKGLLKSFMWLIDDITDRIDS	183	0	null	no	GO_0006886, GO_0015031, GO_0007264	GO_0006471	GO_0006886,GO_0015031,GO_0007264,GO_0006471	0	0	0	0	0	0	0	0	0	0	0	0	0	0	0	0	0	0	0	0	0	0	0	0	0	0	0	0	0	0	0	0	0	0	0	0	0
4470	PF3D7_1359800	ADP-ribosylation factor, putative	null	ATGGGTAATACTGTAAATAAAAAGACAGTTGTTACTAATGAAAATGTAAAGGTTAAAACGATAATACCCCAAAAAAAGTATAATATTTTAATTTTGGGCCTGAATGGGTCAGGTAAAACGACATTATTATATCATAATTTTATTCCAGAATGGACAAATATAACGTCTTATATGGAGCCCACAATTTCGTATCATTATGAGGAAATTAAATGGATAAATGGAAGACTTGGTTTTTGGGATTTATCTGGAAATCCTTTGATGAGAAATATTTGGCCATTAATATATAGAAATGTAAAAGTGAACGCAATTTTATATATTATTAACATTATGGATATATCAGATGAATGTATATCGGAAAATAACTCATTAATAAGCCTTTTGCTAAATGATGAATGTTTA…	MGNTVNKKTVVTNENVKVKTIIPQKKYNILILGLNGSGKTTLLYHNFIPEWTNITSYMEPTISYHYEEIKWINGRLGFWDLSGNPLMRNIWPLIYRNVKVNAILYIINIMDISDECISENNSLISLLLNDECLQTSCIVLVFNTFNEVHNIQENLKNDMLIKYKIEDLINHYGNRIHYLFVDCKNCKMDKGWIQLMQQISYYF	203	0	null	no	GO_0007264	GO_0006471	GO_0007264,GO_0006471	0	0	0	0	0	0	0	0	0	0	0	0	0	0	0	0	0	0	0	0	0	0	0	0	0	0	0	0	0	0	0	0	0	0	0	0	0
3025	PF3D7_1116600	dolichyl-diphosphooligosaccharide--protein glycosyltransferase subunit STT3, putative	STT3	ATGGTTAAGGATGAAAATATGCGAGATGAGCTGGAAGAAGAGATTGATAATTTAAGAGCTCGTTTTTTTGTAAATCGTCTTTTTGAGAGGGTATTTTGTAGTCATTATTTAAGGAAGGTAATGATAAGAAGCAAATGGATGAGATACAGAATGGAAGTGTTTATATTACTTCTAATAGGTGTGTTAAGTTTTATTATAAGATTATTTTCAGTAATACGTAATGAGGCTATAATACATGAATATGATCCTTATTTTAATTATAAATTAACAAATATTTTAAAAGAAGAAGATTTTTATAAATTTTGGAATTATTTCGATGAAAAGTCATGGTATCCATTAGGTAGAACAACTGGGCAAACATTATTTCCAGGATTAATGATTACTAGTTTTTTATTTTAT…	MVKDENMRDELEEEIDNLRARFFVNRLFERVFCSHYLRKVMIRSKWMRYRMEVFILLLIGVLSFIIRLFSVIRNEAIIHEYDPYFNYKLTNILKEEDFYKFWNYFDEKSWYPLGRTTGQTLFPGLMITSFLFYKICHFFGILVSMRNICIYIGPIFSFFTCIISYFLTREIYNFSGAALLSALFVSISPSHISRTVAGSYDNESISIFLLLLCIYNWIRCLKKGSLLSVLICSLSTYYMALSWGAYIFITNSISLFMLIIIILKKYTIKHFIIYNVYYILTTILCLNIPCIHRSVFISIEHLATHSIYILSTFMMFLHFIMKHFHLNEIYIKHKFIQLSFIFFIIIFKYFIFTDKLSWNHRSRTLLDPTYASKHNPIVASISEHQPTTWSSYFFDIHLI…	856	13	null	no	GO_0006486	GO_0006487	GO_0006486,GO_0006487	0	0	0	0	0	0	0	0	0	0	0	0	0	0	0	0	0	0	0	0	0	0	0	0	0	0	0	0	0	0	0	0	0	0	0	0	0
1133	PF3D7_0530750	dolichol-phosphate mannosyltransferase subunit 3, putative	DPM3	ATGATAACCAGGGGAAAGGTTATCGTCTTAATTTTTATCCTATCAACCATTTTATGGATATATAAATTTGACAAGTATAAAAAATCAAATGCTTTAATGAAATGGATACTTATACCCTTATATCTTGTAAGTGCCTTAGGTCTCTATGCAGTCATATCCATATCAATAAGTTTATACAACTTCAATAATATTCCAAATGGTCATGAACAATTATTAAAAGAATTACATAATGTTAAAAAGGAACTTCAAAAAAGGAATTTTATATTTGATTAA	MITRGKVIVLIFILSTILWIYKFDKYKKSNALMKWILIPLYLVSALGLYAVISISISLYNFNNIPNGHEQLLKELHNVKKELQKRNFIFD	90	2	HMM: MITRGKVIVLIFILSTILW, NN: MITRGKVIVLIFILSTILWIY	yes	GO_0006486	GO_0006506	GO_0006486,GO_0006506	0	0	0	0	0	0	0	0	0	0	0	0	0	0	0	0	0	0	0	0	0	0	0	0	0	0	0	0	0	0	0	0	0	0	0	0	0
1331	PF3D7_0618900	phosphatidylinositol N-acetylglucosaminyltransferase subunit GPI1	GPI1	ATGAGTGGTGTCAATTATGATGTAAAATTAAACGAATGTTTAAGTATATTTTTCCCTCAAAATATAGCAACAATTAATCCAGATACAAAATATTATTTATATGGTTTTTCAAATGATAACATATATATTATTGTCCACATTACAGATAAATATATAGAAAACTTTAAATTAAAAAAGAAACATGAAAAATATTCAGAATGGAAAATTTTCAGAATTGTAGGTGAACTTACTTTTATTGAGAATTTCAATGAATTAAATAAAAACATGTGCACTACAAAAAATGAAGACAATAATAAAGTGAATTATCTGTATCTCATTTATTATAATAATATACCTATATTTAAAAAAAAAAGTGGAAATGAACAAAACATAAGTGCGCTATTTATTTTATATGATGTA…	MSGVNYDVKLNECLSIFFPQNIATINPDTKYYLYGFSNDNIYIIVHITDKYIENFKLKKKHEKYSEWKIFRIVGELTFIENFNELNKNMCTTKNEDNNKVNYLYLIYYNNIPIFKKKSGNEQNISALFILYDVKKYVYNMVHDHVNTLVLEAFRREDIIKKIKVKEKQNNNDKNKESNIEKDKNEQTKFTDIYDTNSKSDKDIQKNNMNDGDSNNKNSSLFIDPFESDSYEKNNFSNEKCALQNVDKSKKDKEHIYSENITPSSSNNNNDNNKENDCDKEQLDKYNKDKENKLKLNDKDEYISFNFIEDKLTESFHMNQIIHLINKKCVFTKCLENYENRYFVLKKEEILKKKKKQKKMSIFSYIVSIILFFTYIISLINSCLYYVICTPKLFSEYIFS…	729	6	null	no	GO_0006506	GO_0006506	GO_0006506,GO_0006506	0	0	0	0	0	0	0	0	0	0	0	0	0	0	0	0	0	0	0	0	0	0	0	0	0	0	0	0	0	0	0	0	0	0	0	0	0
2790	PF3D7_1032400	phosphatidylinositol N-acetylglucosaminyltransferase subunit A, putative	PIGA	ATGGAAAGTGCAGTTAGCGAATGCAATATATACAAAAAGGAAAAAGATAAAAATATAATTTACAAACAAGAAAGAAAATGTTGTATTTGCATGGTGAGTGATTTTTTTTATCCAAATTTGGGAGGAATAGAAACTCACATTTTTGAATTGTCTAAGAATTTGATAAAAAAGGGTTTCAAGGTTATAGTTGTAACAAATTTTAATAATAATAGGCATGGTATAAGATGGATGGGTAATGGTATTAAGGTTTATTATTTGCCCTTCCAGCCTTTTTTAGATGTAGTGAGTTTTCCAAATATTATAGGGACTTTACCACTATGTAGAAATATATTATATAGGGAAAAAGTCGACATAGTACATGGTCACCAGGCTACGTCAGCATTAGCTCATCAATTCATT…	MESAVSECNIYKKEKDKNIIYKQERKCCICMVSDFFYPNLGGIETHIFELSKNLIKKGFKVIVVTNFNNNRHGIRWMGNGIKVYYLPFQPFLDVVSFPNIIGTLPLCRNILYREKVDIVHGHQATSALAHQFILHAKTLGIKTIYTDHSLYSFSDKGCIHVNKLLKYCINDVDHSICVSHTNRENLVLRTESNPYKTSVIGNALDTTKFVPCISKRPKFPRINIIVISRLTYRKGIDLIVKVIPLVCQKYPFIKFIIGGEGPKRLLLEEMREKYHLHNSVVLLGKVKQENVKNILQTGHIFLNTSLTEAFCIAIIEAASCGLLVISTDVGGISEVLPHDMMILAKPNHIELCKAVDKALKIVQKVDSNLFHERLTKMYSWEKVAEKTEKVYMNVLNYAN…	461	1	null	no	GO_0006506, GO_0009058	GO_0006506	GO_0006506,GO_0009058,GO_0006506	0	0	0	0	0	0	0	0	0	0	0	0	0	0	0	0	0	0	0	0	0	0	0	0	0	0	0	0	0	0	0	0	0	0	0	0	0
206	PF3D7_0207300	serine repeat antigen 8	SERA8	ATGTTTTCCCTGTGTACAGTACATTCAAATATGTTAATTAATTGCTTTGGAGTTCTACATTGTAATATATGCCGCACAGTATTAAGAAATTGCTTTTTGTCTGGGACATCTGATTTACAAAAATGTATTTCATGTGGAGAGAAGTATTACAAAATTAGTCCTTGTACACAAAACCATGAAAGCTTTTTGATGTCCAAAATAGATATGAATAACACATTTGTGGAGTTAAAGGATCACGAAGAAGTAACCGATGAGAAGATGAAAAATTTGATAACAAAAATAATAGAAATTGCCATAGACAGGCATACGTTGGGTTTACACGATTTTAGTAGTGTTAGCGATGAATATAAAGAGAAAATAAAAATGTTATGTATGTTTTCTAACTATAAAGATAACTAT…	MFSLCTVHSNMLINCFGVLHCNICRTVLRNCFLSGTSDLQKCISCGEKYYKISPCTQNHESFLMSKIDMNNTFVELKDHEEVTDEKMKNLITKIIEIAIDRHTLGLHDFSSVSDEYKEKIKMLCMFSNYKDNYENANNHRQAKVEIVEEHIHKIVESYINEENNMEHMKDLLKNPALCLKNPNQWVKDRAGFKDDDKPSVGIIPERKIFKPYDIKTLKSSLYASSTNCDRQFCDRFSDSNECEHRIRVLNQGKCGNCWVFASSVVIAAYRCRKGLGFAEPSIKYVTLCKNKHLMDIDNNPFGHYNDNICKEGGHLSYYLETLEKTRMLPTSHDVPYNEPITGSECPDNKETWSNIWKGVNLMDRIYAGYIYHGYFKVSFKDYVVSNRTNDLINIIKDYI…	679	0	null	no	GO_0006508	GO_0006508	GO_0006508,GO_0006508	0	0	0	0	0	0	0	0	0	0	0	0	0	0	0	0	0	0	0	0	0	0	0	0	0	0	0	0	0	0	0	0	0	0	0	0	0
468	PF3D7_0311700	plasmepsin VI	PM6	ATGCCGTACTTCCATATATTCCTATACATTTTAATTTTTTGTGTTCTTGTTCATATATGTCCTATTCATACTTTAAATATTTTTAAAAATGATGAAAATGAAAAGGGATCTTTAAATATCCCTCTAGGAAAAGAAAACAATTTATTTTTTAATGAAATAAAATTAGAAAATAGATTTAAAAATAATATCAAAGGATATATACAAAATGTTCAGAAATTTCATTATCTTATGGAAAAAAATAAACCAAATGTATTATCATATATCCAAGAAGATTTATTAAATTTTCATAATAGTCAATTTATTGCTGATATAGGGGTAGGAAATCCACCTCAAGTATTTAAGGTGGTTTTTGATACAGGGTCCAGTAATCTAGCAATCCCATCAACGAAATGTATCAAG…	MPYFHIFLYILIFCVLVHICPIHTLNIFKNDENEKGSLNIPLGKENNLFFNEIKLENRFKNNIKGYIQNVQKFHYLMEKNKPNVLSYIQEDLLNFHNSQFIADIGVGNPPQVFKVVFDTGSSNLAIPSTKCIKGGCASHKKFNPNKSRTFTKNLKNNQESVYTYIQYGTGTSILEQSYDDVYLKGLKIKHQCIGLAIEESLHPFSDLPFDGIVGLGFSDPDFRSQNKYASPLIETIKKQNLLKRNIFSFYVPKKLEKSGAITFGKANKKYTVEGKSIEWFPVISLYYWEINLLDIQLSHKNLFLCESKKCRAAIDTGSSLITGPSTFIQPLLEKINLERDCSNKESLPIISFVLKNVEGKEITLDFMPEDYIIEEGDTENNTLECVIGIMPLDVPPPRG…	432	1	HMM: MPYFHIFLYILIFCVLVHICPIHTL, NN: MPYFHIFLYILIFCVLVHICPIHTL	yes	GO_0006508	GO_0006508	GO_0006508,GO_0006508	0	0	0	0	0	0	0	0	0	0	0	0	0	0	0	0	0	0	0	0	0	0	0	0	0	0	0	0	0	0	0	0	0	0	0	0	0
901	PF3D7_0507200	subtilisin-like protease 3	SUB3	ATGATAAATAGACAGTATTTTATTTGGTATATTTTTATTTTTAATATAATAAACAAAATATATTTTGAAAATATAAGATATGTAAAAAACTATGAGGTGGTGATAAGGAAGAAAAAAAATATAGAAAGGGGGATAGGAAATGATTTTGCATTTATAAGGAGATATTATAAAAGCAGACTTTTGAGTGATGTGTCTTATAAAAATAATAGTATTAAAGGAAAAAATAGAGTGGATAAAGAGGGGGATATAAAAAAATATGATAATAATGATGATAACAAAATGGATAATTCGTATGATTATAAAAATAAGAGTATAAAGGAAAATGAAACCAAAATAAGAAAGGAGCAAGTTATTTCATTAGATAAAAGGTACAATAGGAATATAAATGAAAAAGAAGAA…	MINRQYFIWYIFIFNIINKIYFENIRYVKNYEVVIRKKKNIERGIGNDFAFIRRYYKSRLLSDVSYKNNSIKGKNRVDKEGDIKKYDNNDDNKMDNSYDYKNKSIKENETKIRKEQVISLDKRYNRNINEKEEIKKKIKDIQRKRLIIYFKQDNTILSSRNYKHIFMKVLSSCGHIEKLTFINFYLYEFPKSINNEDMLLKICLRLLESRRINVENDNQISHTVQMKSYNNNNNKWDNINSKNNCIYQIKDKIKDLPNVSPSASTFTSISTSPYTLKLRDRNKYANDKNHIFKINHSNKHKNNNNNNNNNDYHNNNKSNYHSHSSAKCQTQRLNKKMIGTNILDGYDIIQMEEGLNLSHNYELNDVNVCIIDTGIDENHIDLKDNIIEKKTFMKHSYKK…	769	0	null	no	GO_0006508	GO_0006508	GO_0006508,GO_0006508	0	0	0	0	0	0	0	0	0	0	0	0	0	0	0	0	0	0	0	0	0	0	0	0	0	0	0	0	0	0	0	0	0	0	0	0	0
1100	PF3D7_0527300	methionine aminopeptidase 1a, putative	METAP1a	ATGTCTTTTTTAAATAAAAGTTTGATGTTGAATTTTTTAAATACCTTTCCAAAAAAAGGAAAATTTCAACATACTTATATATTAACACCAAAATTAAATAAATCGAAATTACCTGAACGTAAAACATTTAAACCAACCCTACAAGATGGCAAATATAAGGTAACAGCTAGCCAAAAAGTTCCCGAACATATAAAATGCCCAAGTTATGCTAAAACAGGAATTGTACAAAATTCGAATATTAATTATGAAATTAAGGATGACAAATATATAGAAAAGATGAAAAAAGCTTGTAAACTAGCTTCTGAATGTTTAAAGTTATGTTTAGAAAATTCAAAAGAAGGGATAACAACAGATATTATTGATAATATGGCATATGATTTTTATATAAAAAATAATGCA…	MSFLNKSLMLNFLNTFPKKGKFQHTYILTPKLNKSKLPERKTFKPTLQDGKYKVTASQKVPEHIKCPSYAKTGIVQNSNINYEIKDDKYIEKMKKACKLASECLKLCLENSKEGITTDIIDNMAYDFYIKNNAYPAGLNFHSFPKSICASPNEVVCHGIPNLRKLQRGDIITYDCTVFLDGVFGDCAGTVGIGEISERHKKLMDVSKECLYKAISICRDGQLFSEIGRIITEHANKNGFNVIKDFCGHFIGTHMHMYPLIEHHYPNSHNNHRMKKGQIFTIEPILSEGSINIYTWKDKWTVCTNDNSFCSQWEHTILVLDNYAEILT	327	0	null	no	GO_0006508	GO_0006508	GO_0006508,GO_0006508	0	0	0	0	0	0	0	0	0	0	0	0	0	0	0	0	0	0	0	0	0	0	0	0	0	0	0	0	0	0	0	0	0	0	0	0	0
1775	PF3D7_0801700	sentrin-specific protease 2, putative	SENP2	ATGAAAAGTAGTAATAACAAAGAATGTCGATTTAAAGATATACATAATAAAAAAAGCTCCAAATACTTAGATAAGAAAAATATTAAACAAGACCAAGGTGCAAATAATTTATGTGAGATATTATCATCAGATGATAACAACGAAGAATGTAATAACAAAATAAACGATAATTTTATTATTGTGGAACTTATTTCTTATTTATGTGGAAATTCAAAAATTATTTCATTTTATCCAAGTACTAATATAAAAAATTCTGATCAGAATAAATATCTCTATCATTTTTATAAAAAAAAAAAAGTAAAACTATATTTATGCTTAAATAAAAAAAACGATGAAATATTCATATATCAAGTTCAATGTAAATATACCAAAAAAAAGAAAAAAAAAAATGACAGCGAC…	MKSSNNKECRFKDIHNKKSSKYLDKKNIKQDQGANNLCEILSSDDNNEECNNKINDNFIIVELISYLCGNSKIISFYPSTNIKNSDQNKYLYHFYKKKKVKLYLCLNKKNDEIFIYQVQCKYTKKKKKKNDSDADDNNINNNKTKSKDNHCINNNVGHSLDIAVNNNERNVKIKMENNLERNIENYMEDHIKKKINKHENEHIYHSYNYPQSITIDEYLSSSSSKDIKTNHNIEKKQGNIEDNYHNYNYKKKIFIKKLFDSINCSYDLSNIEYTKLQTTDDKTLNSLKLILQQKINKTQNTIKTEQQTYEQKSDINHDSNSGHQQINNFIVNTNNTDTQYSLKNNFNKNYLTCSENNKDKNICKDEEKKFSNDNKTDDNEMKTLFLYFNEPSNIYMNQF…	1784	0	null	no	GO_0006508	GO_0006508	GO_0006508,GO_0006508	0	0	0	0	0	0	0	0	0	0	0	0	0	0	0	0	0	0	0	0	0	0	0	0	0	0	0	0	0	0	0	0	0	0	0	0	0
1837	PF3D7_0808200	plasmepsin X	null	ATGAAACGCATTAGCCCTCTAAACACCCTTTTTTATTTAAGTTTATTTTTTTCATACACATTTAAAGGGTTAAAATGCACCAGAATATATAAAATCGGAACGAAAGCGTTACCGTGTTCTGAGTGTCACGATGTATTTGATTGTACCGGGTGTTTATTCGAGGAAAAAGAATCTTCTCATGTGATACCTTTAAAATTAAACAAGAAGAATCCAAACGATCATAAAAAATTACAAAAACATCATGAGTCTCTAAAATTAGGGGACGTAAAATATTATGTAAACAGAGGAGAAGGAATTTCCGGAAGTTTAGGAACGTCGTCTGGTAATACATTAGATGATATGGATTTAATAAATGAAGAAATAAATAAAAAACGAACAAATGCACAATTAGATGAAAAA…	MKRISPLNTLFYLSLFFSYTFKGLKCTRIYKIGTKALPCSECHDVFDCTGCLFEEKESSHVIPLKLNKKNPNDHKKLQKHHESLKLGDVKYYVNRGEGISGSLGTSSGNTLDDMDLINEEINKKRTNAQLDEKNFLDFTTYNKNKAQDISDHLSDIQKHVYEQDAQKGNKNFTNNENNSDNENNSDNENNSDNENNLDNENNLDNENNSDNSSIEKNFIALENKNATVEQTKENIFLVPLKHLRDSQFVGELLVGTPPQTVYPIFDTGSTNVWVVTTACEEESCKKVRRYDPNKSKTFRRSFIEKNLHIVFGSGSISGSVGTDTFMLGKHLVRNQTFGLVESESNNNKNGGDNIFDYISFEGIVGLGFPGMLSAGNIPFFDNLLKQNPNVDPQFSFYIS…	573	0	HMM: MKRISPLNTLFYLSLFFSYTFKGLKCT, NN: MKRISPLNTLFYLSLFFSYTFKGLKCT	yes	GO_0006508	GO_0006508	GO_0006508,GO_0006508	0	0	0	0	0	0	0	0	0	0	0	0	0	0	0	0	0	0	0	0	0	0	0	0	0	0	0	0	0	0	0	0	0	0	0	0	0
2615	PF3D7_1015300	methionine aminopeptidase 1b, putative	METAP1b	ATGGCAAATATTGATGATATAGAAAAACAAATTGAAAATATAAAAATAAATTCAGATGATAATAAGAATAATGTTTCCAAGAATAAAAATATTTTATTAAATGGAGTAAATTTGAAAGATCATGAAATAAAAGATAATGTTAAATCTGTTGATTATAATAATAATAATAATGAAAATGATACTATGAATGAAATAAATAAACATGTTAAAAATGATGAATATTGTAATAAAGAAAATAGTAATAATAATAATAATAATAATAATAATAATAATAATAATTTAGATACACAGATAAATGAGACTTTAAATTTAAATGAAAAATTTGAAAAAAAAAATGAAGAAAATTTGTGTAGTGGATGCAAAAAAGTATTAATTAAAAAATTAAGTTGCCCTATATGT…	MANIDDIEKQIENIKINSDDNKNNVSKNKNILLNGVNLKDHEIKDNVKSVDYNNNNNENDTMNEINKHVKNDEYCNKENSNNNNNNNNNNNNNLDTQINETLNLNEKFEKKNEENLCSGCKKVLIKKLSCPICLKNKIFSYFCNQECFKGSWKEHQKIHENMNKENNEKEDHLKTIVKKHLSPENFDPTNRKYWVYDDHLKNFVNFKFTGDVRPWPLSKINHVPSHIERPDYAISSIPESELIYKRKSDIYVNNEEEIQRIREACILGRKTLDYAHTLVSPGVTTDEIDRKVHEFIIKNNAYPSTLNYYKFPKSCCTSVNEIVCHGIPDYRPLKSGDIINIDISVFYKGVHSDLNETYFVGDINDVPKEGKELVETCYFSLMEAIKKCKPGMFYKNIGT…	517	0	null	no	GO_0006508	GO_0006508	GO_0006508,GO_0006508	0	0	0	0	0	0	0	0	0	0	0	0	0	0	0	0	0	0	0	0	0	0	0	0	0	0	0	0	0	0	0	0	0	0	0	0	0
2804	PF3D7_1033800	plasmepsin VII	null	ATGAATAAAAATATTATTCAAATATACCTATTTGTTTTTATATTATTACTTAAACAACATATTGTTATTTTAAAAAATGAAGAATTCACGAATCCTTATTCCATAAGAAAGAAGGATATTAAAGCTATTGTAAATGTTAATAATAAATTGAAGAGTATTAATATACATAAATTAGACAATATCAATAAAAAAGATCTTTTAGGAAGTTATAATGAAAATTATATTTTAATAAAATTAAAAAAGCAGGATATTTTTTCCAAAAAATTATCTACTTATTATGGTGAGGTACAAATAGGTGAACAGTCAGAAAATAATATGAACGTTCTTTTTGATACAGGTTCATCACAAGTATGGATTTTAAATGATACTTGTAAAAATAGTTTGTGTAATAATATACAT…	MNKNIIQIYLFVFILLLKQHIVILKNEEFTNPYSIRKKDIKAIVNVNNKLKSINIHKLDNINKKDLLGSYNENYILIKLKKQDIFSKKLSTYYGEVQIGEQSENNMNVLFDTGSSQVWILNDTCKNSLCNNIHSKYKRTKSFVYKYDKKGLPSVIEIFYLSGKIVAFEGYDTIYLGKKLKIPHTNISFATKVDIPILEEFKWDGIIGLGFQNGDSIKRGIKPFLDILKDDKILTNKNYKNQFGYYLSDKEGYITLGGIDNRLKNTPDEEIIWTPVSTEMGYWTIQIMGIRKEYVNNHFEENKEEEEVIVKYEAFHDGGKNSIIDTGTYLIYAPKNTMENYLKDLKINNCDEKYNLPHLIFQIKSDEIKTIKGSAIIEIVLTPNDYVIEYVDKKNNTKEC…	450	1	HMM: MNKNIIQIYLFVFILLLKQHIVILK, NN: MNKNIIQIYLFVFILLLKQHIVILK	yes	GO_0006508	GO_0006508	GO_0006508,GO_0006508	0	0	0	0	0	0	0	0	0	0	0	0	0	0	0	0	0	0	0	0	0	0	0	0	0	0	0	0	0	0	0	0	0	0	0	0	0
3011	PF3D7_1115300	cysteine proteinase falcipain 2b	FP2B	ATGGATTACCACATGGATTATATTCCGAATGAGGTAATTTCTCATCAAGGAGAAAGATTTGTCGACAAATATGTTGATAGAAAAATTTTAAAGAATAAAAAATCATTGTTAGTTATTATTTCATTATCAGTACTTTCAGTAGTTGGTTTTATTTTATTTTATTTTACTCCAAATTTTAGAAAAAGTGATTTATTTAAAAACTCTTCAGTTGAAAATAATAATGATGACTATATAATAAATAGCTTGCTAAAAAGCCCTAATGGCAAGAAATTTATCGTCTCAAAAATTGATGAAGCCTTATCATTCTATGATAATAAAATGAAAGATATAAATAAAAACAATAACAATAATACTTCATCCGATTTTAAAGGTCTTAGCTTATTTAAAGAAAACAAACCA…	MDYHMDYIPNEVISHQGERFVDKYVDRKILKNKKSLLVIISLSVLSVVGFILFYFTPNFRKSDLFKNSSVENNNDDYIINSLLKSPNGKKFIVSKIDEALSFYDNKMKDINKNNNNNTSSDFKGLSLFKENKPSNNFIHNENYFINVFDHKFLMNNVEHINQFYTFIKTNNKQYNSPNEMKERFQVFLQNAHKVKMHNNNKKSLYKKELNRFADLTYHEFKSKYLTLRSSKPLKNSKYLLDQINYDAVIKKYKGNENFDHAAYDWRLHSGVTPVKDQKNCGSCWAFSSIGSVESQYAIRKNKLITLSEQELVDCSFKNYGCNGGLINNAFEDMIELGGICTDDDYPYVSDAPNLCNIDRCTEKYGIKNYLSVPDNKLKEALRFLGPISISIAVSDDFPF…	482	1	null	no	GO_0006508	GO_0006508	GO_0006508,GO_0006508	0	0	0	0	0	0	0	0	0	0	0	0	0	0	0	0	0	0	0	0	0	0	0	0	0	0	0	0	0	0	0	0	0	0	0	0	0
3015	PF3D7_1115700	cysteine proteinase falcipain 2a	FP2A	ATGGATTACAACATGGATTATGCTCCCCATGAAGTAATTTCTCAACAAGGAGAAAGATTTGTTGACAAATATGTTGATAGAAAAATTTTAAAGAATAAAAAATCATTGTTAGTTATTATTTCATTATCTGTACTTTCAGTTGTTGGTTTTGTTTTATTTTATTTTACTCCAAATTCTAGAAAAAGTGATTTATTTAAAAACTCTTCAGTTGAAAATAATAATGATGACTATATAATAAATAGCTTGCTAAAAAGCCCTAATGGCAAGAAATTTATCGTCTCAAAAATTGATGAAGCCTTATCATTCTATGATAGTAAAAAGAATGACATAAATAAATACAACGAAGGTAATAACAACAATAATGCTGACTTTAAAGGTCTTAGCTTATTTAAAGAAAAC…	MDYNMDYAPHEVISQQGERFVDKYVDRKILKNKKSLLVIISLSVLSVVGFVLFYFTPNSRKSDLFKNSSVENNNDDYIINSLLKSPNGKKFIVSKIDEALSFYDSKKNDINKYNEGNNNNNADFKGLSLFKENTPSNNFIHNKDYFINFFDNKFLMNNAEHINQFYMFIKTNNKQYNSPNEMKERFQVFLQNAHKVNMHNNNKNSLYKKELNRFADLTYHEFKNKYLSLRSSKPLKNSKYLLDQMNYEEVIKKYKGNENFDHAAYDWRLHSGVTPVKDQKNCGSCWAFSSIGSVESQYAIRKNKLITLSEQELVDCSFKNYGCNGGLINNAFEDMIELGGICTDDDYPYVSDAPNLCNIDRCTEKYGIKNYLSVPDNKLKEALRFLGPISISVAVSDDF…	484	1	null	no	GO_0006508	GO_0006508	GO_0006508,GO_0006508	0	0	0	0	0	0	0	0	0	0	0	0	0	0	0	0	0	0	0	0	0	0	0	0	0	0	0	0	0	0	0	0	0	0	0	0	0
4120	PF3D7_1323500	plasmepsin V	PMV	ATGAATAATTATTTTTTAAGGAAAGAAAATTTTTTTATATTGTTTTGTTTTGTTTTTGTGAGTATCTTTTTTGTATCAAATGTAACAATAATAAAATGTAATAATGTGGAAAATAAAATTGACAATGTTGGAAAAAAAATTGAAAATGTGGGAAAAAAAATTGGCGATATGGAAAATAAAAATGACAATGTGGAAAATAAAAATGACAATGTGGGAAATAAAAATGACAATGTAAAAAATGCTTCTTCAGATTTGTATAAATATAAATTATATGGTGATATAGATGAATATGCTTATTATTTTCTAGATATAGATATAGGGAAACCATCGCAAAGAATTTCTTTAATTCTAGATACAGGTTCATCTTCGTTAAGTTTCCCGTGTAATGGTTGTAAAGAT…	MNNYFLRKENFFILFCFVFVSIFFVSNVTIIKCNNVENKIDNVGKKIENVGKKIGDMENKNDNVENKNDNVGNKNDNVKNASSDLYKYKLYGDIDEYAYYFLDIDIGKPSQRISLILDTGSSSLSFPCNGCKDCGIHMEKPYNLNYSKTSSILYCNKSNCPYGLKCVGNKCEYLQSYCEGSQIYGFYFSDIVTLPSYNNKNKISFEKLMGCHMHEESLFLHQQATGVLGFSLTKPNGVPTFVDLLFKHTPSLKPIYSICVSEHGGELIIGGYEPDYFLSNQKEKQKMDKSDNNSSNKGNVSIKLKNNDKNDDEENNSKDVIVSNNVEDIVWQAITRKYYYYIKIYGLDLYGTNIMDKKELDMLVDSGSTFTHIPENIYNQINYYLDILCIHDMTNIYEI…	590	2	HMM: MNNYFLRKENFFILFCFVFVSIFFVSNVTIIKCN, NN: MNNYFLRKENFFILFCFVFVSIFFVSNVTIIKCN	yes	GO_0006508	GO_0006508	GO_0006508,GO_0006508	0	0	0	0	0	0	0	0	0	0	0	0	0	0	0	0	0	0	0	0	0	0	0	0	0	0	0	0	0	0	0	0	0	0	0	0	0
4876	PF3D7_1430200	plasmepsin IX	null	ATGTTTTTTATAAATTTTAAGAAAATAAAAAAGAAACAATTTCCGATATATTTAACTCAACATAGAATTATAACAGTGTTTCTTATTTTTATTTATTTTATAAACTTAAAAGATTGTTTCCATATAAATAATTCGCGTATATTAAGTGATGTAGATAAACATAGAGGATTGTATTATAATATACCAAAATGTAACGTATGTCATAAGTGTTCGATATGTACCCACGAAAATGGAGAGGCACAGAATGTCATTCCTATGGTTGCTATACCGAGCAAGAGAAAACATATTCAAGATATAAATAAGGAAAGGGAGGAAAACAAATATCCTTTACATATATTTGAAGAAAAAGACATTTATAATAATAAAGATAATGTTGTTAAAAAAGAAGATATATATAAA…	MFFINFKKIKKKQFPIYLTQHRIITVFLIFIYFINLKDCFHINNSRILSDVDKHRGLYYNIPKCNVCHKCSICTHENGEAQNVIPMVAIPSKRKHIQDINKEREENKYPLHIFEEKDIYNNKDNVVKKEDIYKLRKKKKQKKNCLNFLEKDTMFLSPSHDKETFHINHMNKIKDEKYKQEYEEEKEIYDNTNTSQEKNETNNEQNLNINLINNDKVTLPLQQLEDSQYVGYIQIGTPPQTIRPIFDTGSTNIWIVSTKCKDETCLKVHRYNHKLSSSFKYYEPHTNLDIMFGTGIIQGVIGVETFKIGPFEIKNQSFGLVKREKASDNKSNVFERINFEGIVGLAFPEMLSTGKSTLYENLMSSYKLQHNEFSIYIGKDSKYSALIFGGVDKNFFEGDI…	627	0	HMM: MFFINFKKIKKKQFPIYLTQHRIITVFLIFIYFINLKDCF, NN: MFFINFKKIKKKQFPIYLTQHRIITVFLIFIYFINLKDCF	yes	GO_0006508	GO_0006508	GO_0006508,GO_0006508	0	0	0	0	0	0	0	0	0	0	0	0	0	0	0	0	0	0	0	0	0	0	0	0	0	0	0	0	0	0	0	0	0	0	0	0	0
5034	PF3D7_1446200	M17 leucyl aminopeptidase	LAP	ATGTATTTTTCTTCCTTATGTAAATTTTTGCCAATATCTGAAAAAGAAAAGATATATTTAAATATTGTAAAAAAACGCTTCTGTAAATCAAATATATATTATAATAATAATAATAATAATATTATTAATTATAATAAGAGAGGTTTAAAATTTTATCCTTTTTGTAATAATTTAAAAAAAAATATAAATTTTGTAAATATTAATAATAAGAAGGGAATAAATTTTCATAGTATAAATAAAGAAAGAAAAATGGCAAGTGAAGTACCACAAGTTGTTTCCTTAGATCCAACAAGTATTCCTATTGAATATAATACTCCTATACATGATATAAAAGTTCAGGTTTATGATATAAAAGGAGGTTGTAATGTTGAAGAAGGATTAACTATTTTCTTAGTTAAT…	MYFSSLCKFLPISEKEKIYLNIVKKRFCKSNIYYNNNNNNIINYNKRGLKFYPFCNNLKKNINFVNINNKKGINFHSINKERKMASEVPQVVSLDPTSIPIEYNTPIHDIKVQVYDIKGGCNVEEGLTIFLVNNPGKENGPVKISSKVNDKNVSEFLKDENMEKFNVKLGTSKHFYMFNDNKNSVAVGYVGCGSVADLSEADMKRVVLSLVTMLHDNKLSKLTVVFEINVDKNLFRFFLETLFYEYMTDERFKSTDKNVNMEYIKHLGVYINNADTYKEEVEKARVYYFGTYYASQLIAAPSNYCNPVSLSNAAVELAQKLNLEYKILGVKELEELKMGAYLSVGKGSMYPNKFIHLTYKSKGDVKKKIALVGKGITFDSGGYNLKAAPGSMIDLMKFD…	605	0	null	no	GO_0019538, GO_0006508	GO_0006508	GO_0019538,GO_0006508,GO_0006508	0	0	0	0	0	0	0	0	0	0	0	0	0	0	0	0	0	0	0	0	0	0	0	0	0	0	0	0	0	0	0	0	0	0	0	0	0
3743	PF3D7_1239700	ATP-dependent zinc metalloprotease FTSH 1	FTSH1	ATGAGTTCGAAGTATGACAATCAGAGTTTTCTGTCAACAGGATCAGATAAATATGGTGAACAAGAAAATTCTGTTTTATTGCATGATGAGGAAGATGAATATATAAATGAGAATAAAAAGAAGAGAAATGAACGTGATAAGAAATTTCGATATTATGAAAATTTTTTTAATAGAAGGAGAAGTAAAAAGTGGAATTATTTCATAATATTTTTTTTAGGTGTATGTTTAGGTTTTGCCATATGGCCATTTTTTATGACTATAATAACGTATAGATTATTTTATAAAGATAATTTTAATAATACAAATTATCGAACAAATAATTCTTCCACTTCTTTGAAATCTTATGGAAATGAGAAAAATAAGAAGAGTGATAACAATGGAAAAGTACCCATGAAAGAT…	MSSKYDNQSFLSTGSDKYGEQENSVLLHDEEDEYINENKKKRNERDKKFRYYENFFNRRRSKKWNYFIIFFLGVCLGFAIWPFFMTIITYRLFYKDNFNNTNYRTNNSSTSLKSYGNEKNKKSDNNGKVPMKDQSPNKVSPHFKPIRFEEIAGIDESKLELLEVVDFIKNREKYHEMGARMPKGVLLVGPPGSGKTMLARAVATEANVPYIYTSGPEFIEIYVGQGAKRIRQLFAHARSVAPSIVFIDEIDAIGGKRSSGSVNGAGQREHDQTLNQLLVEMDGFSNTVHIMVIGATNRIDTLDSALLRPGRFDRIVYVPLPDINGRKKILEIYIKKIKSDLKLEDIEKIARLTPGFSGADLENVVNEATILATRNNKSLVTINELYEARDKVSMGPERK…	880	1	null	no	GO_0006508	GO_0006508, GO_0042493	GO_0006508,GO_0006508,GO_0042493	0	0	0	0	0	0	0	0	0	0	0	0	0	0	0	0	0	0	0	0	0	0	0	0	0	0	0	0	0	0	0	0	0	0	0	0	0
721	PF3D7_0413900	ubiquitin carboxyl-terminal hydrolase 13, putative	USP13	ATGGCTGATATTAAAAGTATAATATCTTTAATTTCTACAATTGTAAAAGATGAGCCTACCAAAGAAGAAGTAATATATTTAGGAGAATGTAGTATAACAGGGCATAAAGATTTTTTTGAAGATGGTATATTCATCGATTTGTTGTCCTTCGAAAGTTTCAGTTTGAAATTCTTAAAATGCAATTATAACCGATTAAGTAAGTTATCAAGTGAAGGAAAAAATCACCGATTTTACCTGAATATAAAAAAGAAGAAAAATTTGCTAGAGAATATAGAAAAAAAAGTTATAACGAATTTGAATATTAATGCGGAAGGTGGTTTTAATGAAAACAAAGTTTATGAATATGAATGGGAATATTCTGTATATGATATAGAAACAGGTTTGTATATAAAATTAGAA…	MADIKSIISLISTIVKDEPTKEEVIYLGECSITGHKDFFEDGIFIDLLSFESFSLKFLKCNYNRLSKLSSEGKNHRFYLNIKKKKNLLENIEKKVITNLNINAEGGFNENKVYEYEWEYSVYDIETGLYIKLEDLDESVQKICKGIINHKNEVKKDNINKWVNDIKESKYAKDLVQLEGIKIKNENIHCAVCKSTKNIWLNLSDGYIGCGRKIFNYGGGCLNNEEGAALKHFYESGKKYPLVVKIGTITKDGEADVFSYADDENDSVIDPYIGVHLKNLGINIMNLEKTEITTLEKEIEENQNINFSSILDNNIQTICQQGKIGFVNLGNTCYMNSALQVLLSIKDISYRYLNNISDFLLSLDYKKKTHDDLFLQYSKLCYMIFEEDYITKKKQYVKKF…	853	0	null	no	GO_0016579, GO_0006511	GO_0006511	GO_0016579,GO_0006511,GO_0006511	0	0	0	0	0	0	0	0	0	0	0	0	0	0	0	0	0	0	0	0	0	0	0	0	0	0	0	0	0	0	0	0	0	0	0	0	0
3998	PF3D7_1311500	26S protease regulatory subunit 7, putative	RPT1	ATGGAAGAAGAAACTAACACTCAATCGAAGCCATTAGATGATGAAGATATAAATATATTGAAATCATATGGCTCTGGACCATATTCGAAGACCATTAAAAAGGTAGAAGGAGACATATCAGGACTCCTAGTTAATATAAATAAATTATGTGGTGTAAGGGAGAGTGATACAGGATTATGTTTACCAAATCAATGGGATTTACAATTAGATAAACAAATGTTAAATGAAGAACAACCTTTACAAGTTGCAAGATGCACAAAAATTATTAATGCAGATACAGATCAAACTAAATATATTATAAATGTAAAACAAATAGCTAAATTTGTAGTAGGGTTAGGAGATAAGGTAGCACCCAGTGATATTGAAGAAGGAATGAGAGTAGGTGTTGATCGTACGAAA…	MEEETNTQSKPLDDEDINILKSYGSGPYSKTIKKVEGDISGLLVNINKLCGVRESDTGLCLPNQWDLQLDKQMLNEEQPLQVARCTKIINADTDQTKYIINVKQIAKFVVGLGDKVAPSDIEEGMRVGVDRTKYKIQILLPPKIDPSVTMMTVEEKPDITYNDIGGCKEQLEKLREVVEMPLLQPERFVTLGIDPPKGVLLYGPPGTGKTLTARAIANRTDACFICVIGSELVQKYVGEGARMVRELFQMAKSKKACILFIDEVDAIGGSRGDESAHGDHEVQRTMLEIVNQLDGFDNRGNIKVLMATNRPDTLDSALVRPGRIDRRIEFSLPDLEGRTHIFKIHANTMNMSRDVRFELLARLCPNSTGSDIRSVCTEAGMFAIRARRKTITEKDLLLA…	420	0	null	no	GO_0030163	GO_0006511	GO_0030163,GO_0006511	0	0	0	0	0	0	0	0	0	0	0	0	0	0	0	0	0	0	0	0	0	0	0	0	0	0	0	0	0	0	0	0	0	0	0	0	0
193	PF3D7_0205900	26S proteasome regulatory subunit RPN1, putative	RPN1	ATGACAGCAGAGGATAAAAAGGCCGTATCTATACAAGTTCCAGTGAAAGATGTGGATGATAAAAGAAGAAAATTGAATAATTCAAAAATAAAAAAGGAAGAATTAAACGAAGAAGAAAAGAAGAAGAAAGAAGAATTAGAATTATTAATTACAAGATTAAGAGATGAAGATGTAAATGTTGTAAATTTGTCGATTAGTTTATTAAATAAAGAAATTATAGATACAAGTGGTATATTAACATCATCGTTATTAGCATTAAAGGTATTAAAAACACATTATAATACGTTAATAGAAATATTTAATGAAATGATATTTGAAGAATGTAAAAAAAAGTTAAGTAATATGATCAGTGCATTATCTACAACCATAGGAGATGAAAATAATATTGTAAAATTTGTT…	MTAEDKKAVSIQVPVKDVDDKRRKLNNSKIKKEELNEEEKKKKEELELLITRLRDEDVNVVNLSISLLNKEIIDTSGILTSSLLALKVLKTHYNTLIEIFNEMIFEECKKKLSNMISALSTTIGDENNIVKFVITGNKHDLINYGHEYIKNLITKLLVEYKILKEEENNQNGLTTTSTTSNKLVTINHIYDIVNIVVPYCFAHNTEYEAIDLLIEVDKINDIYLYVDEKSCDRSILYLLNLTHYSSSTDEYYKLMDVILNILKKHNKHVECLKILLRLNKIDKIKDLIFECNDILICKQIALICSRHCVHIQFTEEEIKKYTHLNLNEISTLTSGEHLSPIFLKLAKDLDVEEPKLPEDVYKSHLEEKRNTTVWDSAKQNLSSTFVNAFVNAAFCKDKL…	966	0	null	no	GO_0042176	GO_0006511	GO_0042176,GO_0006511	0	0	0	0	0	0	0	0	0	0	0	0	0	0	0	0	0	0	0	0	0	0	0	0	0	0	0	0	0	0	0	0	0	0	0	0	0
4261	PF3D7_1338100	26S proteasome regulatory subunit RPN3, putative	RPN3	ATGAAAGATAAACATAAAAAAGTAGAATATGCCGAGAAGGATGTTGAAATAAAAGAAATTGAGAAAGATGATGGAGATAATAAAGTATTTGTAAACAATTTGTTGACGAGCGTAAATTATATTAACAATGCTATAGTACATAAAGATAATAGGCATATGTTACGTATGTTGAAATATATTAAAAATATTCGATTAAGTATTAAGAATGATAAGAATATGTCGATGCCAATAATTATTTATTTAATAAAAAGAATTTTTAAAGAAAATTATCCTATATATAATATATTAAATAAATATATGAATATATATGAGGAAGGGTTATATAAAGAAATTAGTGATTTTTATAATATAAACGAAAAAACATATATGAATTGTTTACCAGAGTTAGAAGTTTTTTTT…	MKDKHKKVEYAEKDVEIKEIEKDDGDNKVFVNNLLTSVNYINNAIVHKDNRHMLRMLKYIKNIRLSIKNDKNMSMPIIIYLIKRIFKENYPIYNILNKYMNIYEEGLYKEISDFYNINEKTYMNCLPELEVFFYLLILLYLLDEKCYDEGMELSTIIINRINKINRRSLDYINAKVYFYYSWIHELGGKLSQVRQKLLFIYRNACLHRDIMTQTVVVNLILRDYIKHNLYDLAVRFISKTSFPENLSSNAQYARYLYYIGKILAVQLDYSEAHRKITQALRKAPQHTQSAKGFKLAATKMEIVVELLMGDIPDRSIFSNKIMYKKLIPYKHVVSAVRNGDINKFAQVMNNYTDLFIHDGVYLLIKRIHHNVIKTALRIINLSYSRISINDIGKKIGIES…	503	0	null	no	GO_0042176	GO_0006511	GO_0042176,GO_0006511	0	0	0	0	0	0	0	0	0	0	0	0	0	0	0	0	0	0	0	0	0	0	0	0	0	0	0	0	0	0	0	0	0	0	0	0	0
5236	PF3D7_1466300	26S proteasome regulatory subunit RPN2, putative	RPN2	ATGAGATTTGAAAATCAGTTTAGTAAACATGATATCGTTACGTCCGCCAGTGGTGTAATAGCATTATTAAATGAAGAAGAAACAAGTTTAAAGCTTTTTGGTCTAGAAAAATTAAATGCAATAGTAGATGTATATTGGCCAGAACTCGCTGATTCTATATTTAAGATAGAAGAATTATGTGAAGATGAAGATTTTGTTGGTAGAGAATTAGCTAATTTATTGGCAAGCAAAATATATTTTCATTTAGAAAAATATTCAGAAGCTTTAAAATATGCATTGTGTGCTGGTAAATTATTTAATATTAAAGAAAAATCACAATATGTTGAGACCATGTTAGCGAAATGTATAGAGAAATATGTCGAAATCAGAGAAATGCAATATGACATAGATTATAACAAT…	MRFENQFSKHDIVTSASGVIALLNEEETSLKLFGLEKLNAIVDVYWPELADSIFKIEELCEDEDFVGRELANLLASKIYFHLEKYSEALKYALCAGKLFNIKEKSQYVETMLAKCIEKYVEIREMQYDIDYNNQHNINDGITNNNDIFNAYNNNDLVELNSHNELLNKETDIFRFDINNEINQKMELLVDEMIDVCIKSNDIKEALGVALDARRLDKVEYIIANAENKIEILAHSINNEKHINMNKSFRNEYFKLLVNLYLSLSEEELKTEYINLCECLYYIDDYKKVAEILLKLLHNYHLMAYQISFDLVDFENKIFLRNILGQIKENLIQNKAYYFGEEYFVTTPQEENNDADNKENESNAITNEQQDENNNEKEDKDNNDGKNPEHNDDNNKPNDN…	1172	0	null	no	GO_0042176	GO_0006511	GO_0042176,GO_0006511	0	0	0	0	0	0	0	0	0	0	0	0	0	0	0	0	0	0	0	0	0	0	0	0	0	0	0	0	0	0	0	0	0	0	0	0	0
72	PF3D7_0108000	proteasome subunit beta type-3, putative	null	ATGGGGTCTATATATAATTATAATGGTGGTTGCGTTTTAGGAATGAGTGGATCAAATTGTGTCGCGATAGCATGTGATTTGAGATTAGGAGCAAATACATTTACAACCGTTAGTACAAAATTTAGTAAGATTTTCAAGATGAATAATAATGTATATGTAGGATTAAGTGGATTAGCTACTGATATACAAACGTTATATGAAATATTAAGATATCGTGTTAATTTATATGAAGTTAGGCAAGATGCAGAAATGGATGTTGAATGTTTTGCAAATATGTTATCGAGCATACTATATTCTAATAGATTCTCTCCTTATTTTGTTAATCCTATAGTTGTTGGATTTAAACTTAAACATTATGTAGATGAAGAAGGAGAAAAGAAAGTTAATTATGAACCTTAT…	MGSIYNYNGGCVLGMSGSNCVAIACDLRLGANTFTTVSTKFSKIFKMNNNVYVGLSGLATDIQTLYEILRYRVNLYEVRQDAEMDVECFANMLSSILYSNRFSPYFVNPIVVGFKLKHYVDEEGEKKVNYEPYLTAYDLIGAKCETRDFVVNGVTSEQLFGMCESLYVKDQDENGLFETISQCLLSALDRDCISGWGAEVLVLTPEKIIKKKLKARMD	218	0	null	no	GO_0051603	GO_0006511	GO_0051603,GO_0006511	0	0	0	0	0	0	0	0	0	0	0	0	0	0	0	0	0	0	0	0	0	0	0	0	0	0	0	0	0	0	0	0	0	0	0	0	0
1009	PF3D7_0518300	proteasome subunit beta type-1, putative	null	ATGGATCTTATATTATATAATGACAATTTAACAGAAAAGAAAACAGAGAAGGAAAATGTAATAGAGCATGGTCGTGGTTTTAAAAGATGGTATCCATATATTGACAATGGAGGAACTGTCATTGGCTTAACTGGTAAAGATTATGTTATTTTAGCTGCAGATACAAGATTATCTTTATCATATTCAATATATACAAGATTCTGCCCAAAGATATCTAAATTGACTGATAAGTGTATTATAGGTTCCTCAGGAATGCAGTCTGATATAAAAACACTCCATTCATTATTACAAAAAAAAATTCAATTGTTTGTTTTGGAACACTCCCATTATCCAGACATTCATGTTATAGCTAGATTGTTGTGTGTAATATTATATAGTAGAAGATTTTTCCCGTATTAT…	MDLILYNDNLTEKKTEKENVIEHGRGFKRWYPYIDNGGTVIGLTGKDYVILAADTRLSLSYSIYTRFCPKISKLTDKCIIGSSGMQSDIKTLHSLLQKKIQLFVLEHSHYPDIHVIARLLCVILYSRRFFPYYAFNILAGVDENNKGVLYNYDSVGSYCEATHSCVGSGSQLILPILDNRVEQKNQLIKNTNFNLGDDINFVKDAITSATERDIYTGDKTLIYVIDKMGINVNTLDLKQD	240	0	null	no	GO_0051603	GO_0006511	GO_0051603,GO_0006511	0	0	0	0	0	0	0	0	0	0	0	0	0	0	0	0	0	0	0	0	0	0	0	0	0	0	0	0	0	0	0	0	0	0	0	0	0
2574	PF3D7_1011400	proteasome subunit beta type-5	null	ATGGTAATAGCAAGTGATGAAAGCTTTATGAATGAAATTGATAATTTAATAAATGATGTGGAAGATGAAAGAATAGATAATGATGAATTAGAGTTTTGTGTAGCTCCAGTGAATGTACCAAGAAATTTTATAAAATATGCACAAACTCAAAATAAGAAATTATTTGATTTTCATAAAGGTACTACAACTTTAGCATTTAAATTTAAAGATGGGATAATAGTTGCAGTAGATTCCCGAGCATCTATGGGATCTTTTATATCTTCACAGAATGTTGAAAAGATTATTGAAATAAATAAAAATATATTAGGAACAATGGCAGGAGGAGCTGCTGATTGCTTATATTGGGAAAAATATTTAGGTAAAATAATAAAGATTTATGAATTAAGAAATAACGAAAAA…	MVIASDESFMNEIDNLINDVEDERIDNDELEFCVAPVNVPRNFIKYAQTQNKKLFDFHKGTTTLAFKFKDGIIVAVDSRASMGSFISSQNVEKIIEINKNILGTMAGGAADCLYWEKYLGKIIKIYELRNNEKISVRAASTILSNILYQYKGYGLCCGIILSGYDHTGFNMFYVDDSGKKVEGNLFSCGSGSTYAYSILDSAYDYNLNLDQAVELARNAIYHATFRDGGSGGKVRVFHIHKNGYDKIIEGEDVFDLHYHYTNPEQKDQYVM	271	0	null	no	GO_0051603	GO_0006511	GO_0051603,GO_0006511	0	0	0	0	0	0	0	0	0	0	0	0	0	0	0	0	0	0	0	0	0	0	0	0	0	0	0	0	0	0	0	0	0	0	0	0	0
4166	PF3D7_1328100	proteasome subunit beta type-7, putative	null	ATGAAACTCGAATATATAAATATACTCAAAGAAGAAAACGGAGGATATAATTTTGATAACTTAAAAAGAAATGAAATATTAAAAGAAAAGGGAGTAAAGTTTCCACAATTTCGAAAAACAGGAACAACAATCTGTGGATTGGTTTGCCAAAATGCAGTTATTTTGGGTGCCGATACAAGAGCTACGGAGGGACCAATAGTAGCTGATAAAAATTGTAGTAAATTACATTATATAAGTAAAAATATATGGTGTGCAGGTGCAGGTGTAGCAGGAGATTTAGAACATACAACTTTATGGTTACAACATAATGTCGAATTACATCGTTTAAATACAAATACACAACCAAGAGTATCCATGTGTGTATCAAGATTAACTCAAGAATTATTTAAATATCAAGGA…	MKLEYINILKEENGGYNFDNLKRNEILKEKGVKFPQFRKTGTTICGLVCQNAVILGADTRATEGPIVADKNCSKLHYISKNIWCAGAGVAGDLEHTTLWLQHNVELHRLNTNTQPRVSMCVSRLTQELFKYQGYKVCAIVLGGVDVNGPQLYGIHPHGSSCLLPFTALGSGSLNAMAVLEAKYRDNMTIEEGKNLVCEAICAGIFNDLGSGGNVDICVITKDSYQHIRPYKEPNMRLYHLPHPTIYPKGTTPILSEKIEYIKKFISVEDA	270	0	null	no	GO_0051603	GO_0006511	GO_0051603,GO_0006511	0	0	0	0	0	0	0	0	0	0	0	0	0	0	0	0	0	0	0	0	0	0	0	0	0	0	0	0	0	0	0	0	0	0	0	0	0
5282	PF3D7_1470900	proteasome subunit beta type-2, putative	null	ATGGATACGTTGATTGGTTTAAGAGGAAACAATTTCGTAGTCCTGGCTGCTGATACATATAGCATAAATTCAATAATTAAATTAAAAAATGATGACAACACAAAATTTTATGATATACATGGAAATAAATGTTTATTACTAGGAGGTTCGATAGGAGACAGATTACAATTTGGAGAATTCATTCGTAAAAATGTGCACTTGTATCAGTATCAAAATAATACAGATATGTTTGTTAAAAGTTTTGCTTTTTTTACAAGAAAAAATTTGGCTTACTACTTGAGAAGAAACCCTTTTGAAGTTAATTGTCTGATAGCTGGATATGATAAGAAGGATGGATATCAACTATACTGGTGTGATTATTTAAGTAATATGGATTCTGTTAATAAAGGTGCTCATGGA…	MDTLIGLRGNNFVVLAADTYSINSIIKLKNDDNTKFYDIHGNKCLLLGGSIGDRLQFGEFIRKNVHLYQYQNNTDMFVKSFAFFTRKNLAYYLRRNPFEVNCLIAGYDKKDGYQLYWCDYLSNMDSVNKGAHGYGAYLVSAILDKYYHENLTVDEALDIFKLCFEELKKRFLLTQINYELRIMYDNKVETQYVTV	195	0	null	no	GO_0051603	GO_0006511	GO_0051603,GO_0006511	0	0	0	0	0	0	0	0	0	0	0	0	0	0	0	0	0	0	0	0	0	0	0	0	0	0	0	0	0	0	0	0	0	0	0	0	0
522	PF3D7_0317000	proteasome subunit alpha type-3, putative	null	ATGGCTGGACTTAGTGCTGGGTATGATTTATCCGTGTCAACTTTTTCTCCAGACGGTCGTTTGTATCAGGTTGAATATATTTATAAATCAATAAATAATAACAACACAGCTTTATGTTTAGAATGTAAGGATGGAATAATATGTTGTTGTATAAATTCAAATATGGATAAGAATAAGATGATTAAAAAAAATAGTTATAATAGAATATATCATGTCAATAATAATATTATAATAACATATTCAGGATTTGATGGAGATGCAAGAAATATAATAGATAGAGCAAGAAGTGAAGCAAATACTTATTATTATAATTTCCATACAAACATACCATTACATATTTTAGTAAACAGAATTTCTTTATATATCCATGCGTATACATTATATTGGCACATGAGACCT…	MAGLSAGYDLSVSTFSPDGRLYQVEYIYKSINNNNTALCLECKDGIICCCINSNMDKNKMIKKNSYNRIYHVNNNIIITYSGFDGDARNIIDRARSEANTYYYNFHTNIPLHILVNRISLYIHAYTLYWHMRPFAASIIISSFNEKDKGDIYCIEPNGACYKYSGIVIGKNKEMFKTEIEKKDYKDINVRDAIEDIYKFILTSDDHMNKNNLQNLVNFSWICKESSYEFQNIHEEILTPALNKAVEYIEKLN	252	0	null	no	GO_0051603, GO_0006511	GO_0006511	GO_0051603,GO_0006511,GO_0006511	0	0	0	0	0	0	0	0	0	0	0	0	0	0	0	0	0	0	0	0	0	0	0	0	0	0	0	0	0	0	0	0	0	0	0	0	0
1227	PF3D7_0608500	proteasome subunit alpha type-2, putative	null	ATGGCAGATGGTGAATATAGTTTTTCTTTAACAACTTTTAGTCCAACAGGAAAATTAGTACAAATTGAATATGCTCTTAATAGAGTATCTAGCAGTTCGCCAGCTTTAGGTATTAGAGCCAAGAATGGTGTGATAATTGCTACCGAAAAGAAAAGTCCAAATGAATTAATAGAAGAAAATAGCATATTCAAAATACAACAAATAAGTGAACATATAGGTATTGTATATGCAGGAATGCCTGGAGATTTCCGTGTATTATTAAAAAGGGCAAGAAAAGAAGCCATAAGATATTCTTTACAATATGGAAGTGAAATATTAGTAAAAGAATTAGTAAAAATAATTGCATCAATAGTTCAAGAATTTACACAAACAGGTGGGGTAAGACCATTTGGTTTATCT…	MADGEYSFSLTTFSPTGKLVQIEYALNRVSSSSPALGIRAKNGVIIATEKKSPNELIEENSIFKIQQISEHIGIVYAGMPGDFRVLLKRARKEAIRYSLQYGSEILVKELVKIIASIVQEFTQTGGVRPFGLSLLICGVDVYGYHLYQIDPSGCYFNWMATCVGKDYQNNMSFLEKRYNKDIEIEDAIHTAILTLKESYEGVLNEKNIEIGVAYDNKPFKILTQNEIKDYLIEIE	235	0	null	no	GO_0051603, GO_0006511	GO_0006511	GO_0051603,GO_0006511,GO_0006511	0	0	0	0	0	0	0	0	0	0	0	0	0	0	0	0	0	0	0	0	0	0	0	0	0	0	0	0	0	0	0	0	0	0	0	0	0
1710	PF3D7_0727400	proteasome subunit alpha type-5, putative	null	ATGTTTTCAACAAGGAGTGAATATGATAGGGGAGTAAATACCTTTTCTCCTGAAGGACGACTTTTTCAAGTTGAATATGCCTTAGGGGCGATAAAACTTGGTAGTACGGCTGTAGGTATTTGTGTGAACGATGGAGTGATATTAGCATCCGAGAGAAGAATTTCCTCAACACTTATCGAAAAAGATTCCGTTGAGAAATTATTATCGATAGATGATCATATTGGTTGTGCGATGAGTGGTTTGATGGCTGATGCAAGAACATTAATTGATTATGCAAGAGTCGAGTGTAATCATTATAAATTTATTTATAATGAGAATATAAATATAAAGTCATGTGTAGAACTAATATCTGAATTAGCTTTAGATTTTTCTAATTTGTCTGATAGTAAAAGAAAAAAG…	MFSTRSEYDRGVNTFSPEGRLFQVEYALGAIKLGSTAVGICVNDGVILASERRISSTLIEKDSVEKLLSIDDHIGCAMSGLMADARTLIDYARVECNHYKFIYNENINIKSCVELISELALDFSNLSDSKRKKIMSRPFGVALLIGGVDKNGPCLWYTEPSGTNTRFSAASIGSAQEGAELLLQENYKKDMTFEQAEILALTVLRQVMEDKLSTSNVEICAIKKSDQTFYKYNTDDISRIIDVLPSPVYPTIDMTA	256	0	null	no	GO_0051603, GO_0006511	GO_0006511	GO_0051603,GO_0006511,GO_0006511	0	0	0	0	0	0	0	0	0	0	0	0	0	0	0	0	0	0	0	0	0	0	0	0	0	0	0	0	0	0	0	0	0	0	0	0	0
1830	PF3D7_0807500	proteasome subunit alpha type-6, putative	null	ATGGTAAGGCCTTCACAGAGTATGTATGATAGACACTTGACGATTTTTTCTCCAGATGGGAATTTATATCAAATAGAATATGCTATAAAAGCAGTAAAAAATACAAATATAACCTCCGTAGGAGTAAAGGGAGAAAATTGTGCTGTAATAATTTCCCAAAAGAAAATGGCTACACAATATATTTCTCAAGATAAATTATTAGATTATAATAACATAACTAATATATATAATATAACAGATGAAATAGGATGCTCAATGGTAGGTATGCCAGGAGATTGTTTAAGTATGGTTTATAAAGCTAGATCAGAAGCATCCGAATTTTTATATAGTAACGGATATAATGTAAATGCCGAAACGTTATGTAGAAATATTTGTGATAAAATACAAGTGTATACACAA…	MVRPSQSMYDRHLTIFSPDGNLYQIEYAIKAVKNTNITSVGVKGENCAVIISQKKMATQYISQDKLLDYNNITNIYNITDEIGCSMVGMPGDCLSMVYKARSEASEFLYSNGYNVNAETLCRNICDKIQVYTQHAYMRLHACSGMIIGIDENNKPELFKFDPSGFCAGYRACVIGNKEQESISVLERLLEKRKKKIQQETIDEDIRNTTILAIEALQTILAFDLKASEIEVAIVSTKNRNFTQISEKEIDNYLTYIAERD	260	0	null	no	GO_0051603, GO_0006511	GO_0006511	GO_0051603,GO_0006511,GO_0006511	0	0	0	0	0	0	0	0	0	0	0	0	0	0	0	0	0	0	0	0	0	0	0	0	0	0	0	0	0	0	0	0	0	0	0	0	0
4412	PF3D7_1353800	proteasome subunit alpha type-4, putative	null	ATGGCAAGAAGATATGATAGTAGAACAACTACCTTTTCTCCAGAAGGAAGGTTATATCAAGTAGAATATGCTTTGGAAGCCATAAATAATGCAAGTATAACAATTGGTTTAATAACAAAGGATGGAGTAATATTAGGAGCGGATAAAGTTTTTATTTCAAAATTAATTGATAAAGCTAATAATTATGAAAAAATATATAAAATTGATAAACACATATTTTGTGGTGTAGCAGGATTGAATGCTGACGCAAATATTTTAATAAACCAATCTAGATTATATGCACAAAGATATTTATATAATTATAATGAAGTACAACCAGTATCACAATTAGTAGTTCAAATATGTGATATCAAGCAAAGTTACACACAATATGGTGGATTAAGACCATATGGTGTTAGC…	MARRYDSRTTTFSPEGRLYQVEYALEAINNASITIGLITKDGVILGADKVFISKLIDKANNYEKIYKIDKHIFCGVAGLNADANILINQSRLYAQRYLYNYNEVQPVSQLVVQICDIKQSYTQYGGLRPYGVSFLIGGYDTKDGYQLYHTDPSGNYSGWFATAIGTNNLTASSVLKQEWKNDMTLEEGLLLALKTLAKSTDTEIPKSEKIELAYLTNKDGEVYQKYLTEKEIEELIKLYTQKYIKE	246	0	null	no	GO_0051603, GO_0006511	GO_0006511	GO_0051603,GO_0006511,GO_0006511	0	0	0	0	0	0	0	0	0	0	0	0	0	0	0	0	0	0	0	0	0	0	0	0	0	0	0	0	0	0	0	0	0	0	0	0	0
4413	PF3D7_1353900	proteasome subunit alpha type-7, putative	null	ATGTCTTATGATAGAGCTATAACAGTTTTTAGTCCTGATGGACATTTGCTACAAGTAGAACATGCCTTAGAAGCAGTTAAAAAAGGTGGTTGTGCTGTAGCTATAAAAAGTTCAAATTTCGCTGTTTTAGCAGTCGAAAAAAAGAATATACCTAAATTACAAAACCCAAAAACTACTGAAAAATTGATTAAATTAGATGAACATAATTGTTTAGCCTTTGCTGGTTTAAATGCTGATGCAAGAGTATTAGTCAATAAGACTCGATTAGAATGCCAAAGATATTATTTAAATATGGATGAACCGGCACCTGTAGATTATATTGCAAAATATGTTGCAAAAGTACAACAGAAATTTACACATAGGGGTGGTGTAAGACCATTTGGTATAGCCACACTAATA…	MSYDRAITVFSPDGHLLQVEHALEAVKKGGCAVAIKSSNFAVLAVEKKNIPKLQNPKTTEKLIKLDEHNCLAFAGLNADARVLVNKTRLECQRYYLNMDEPAPVDYIAKYVAKVQQKFTHRGGVRPFGIATLIAGFKNNKEICIYQTEPSGIYAAWKAQAIGKNAKIVQEFLEKNYQENMEQKDCIFLALKAIFEVVELSSKNVEVALLTEKDLTFIEEQEINSMVELIDQERTKNNEQNE	241	0	null	no	GO_0051603, GO_0006511	GO_0006511	GO_0051603,GO_0006511,GO_0006511	0	0	0	0	0	0	0	0	0	0	0	0	0	0	0	0	0	0	0	0	0	0	0	0	0	0	0	0	0	0	0	0	0	0	0	0	0
5320	PF3D7_1474800	proteasome subunit alpha type-1, putative	null	ATGTATCGAAATTTATATGATACAGACAATATAATTTACTCTCCAGAAGGAAGATTGTACCAAGTAGAATATGCAAGTGAAGCAATAAAACAAGGAACATGTGCAGTAGCTATAAAGTCAAAGGATTATGTGGTTGTGAGTGGATTAAAGAAATGCATTAGTAAATTATCTTTTCCTCAAGAGAAGATATTTAAAATTGATGATTATATTGGTATTAGTATGAGTGGAATTACTTCTGATGCTAAGGTTTTAACAAAATTTATGCAGAATGAATGTTTATCTCATAAATTTTTATATAATGAAAATATAAATATTGAATCCTTAGTAAGAAGTGTAGCAGATAAATATCAGAAGAATACACAAAAAAGTAGTAAGAGAGCATTTGGAGTAGGGTTAATG…	MYRNLYDTDNIIYSPEGRLYQVEYASEAIKQGTCAVAIKSKDYVVVSGLKKCISKLSFPQEKIFKIDDYIGISMSGITSDAKVLTKFMQNECLSHKFLYNENINIESLVRSVADKYQKNTQKSSKRAFGVGLMIAAYHNEPCIFETRPNGSYFEYDALSFGARSHASKTYLEKNLHLFEECSLEELILHCLKALKCSLSSESELTISNTALAVVGKNHPWQEISSLQLEEYLSKVKMDAEQEQVEENVQNEANE	254	0	null	no	GO_0051603, GO_0006511	GO_0006511	GO_0051603,GO_0006511,GO_0006511	0	0	0	0	0	0	0	0	0	0	0	0	0	0	0	0	0	0	0	0	0	0	0	0	0	0	0	0	0	0	0	0	0	0	0	0	0
178	PF3D7_0204500	aspartate transaminase	AspAT	ATGGATAAGTTATTAAGCAGCTTAGAAAATATCGAAGTCGACAATATCTTAAAAACGGCAAGAGAGTTTAAGGAAGATACATGTGAGGAGAAAATAAATTTATCCATCGGTGTGTGTTGTAATGATGATGGAGACTTACATATATTTGATAGTGTATTAAATGCCGATAAGTTAGTAACAGAAAATTATAAAGAGAAACCATATTTGTTAGGTAACGGTACAGAAGATTTTTCAACATTAACACAGAATTTAATATTTGGTAATAATTCCAAATATATAGAAGATAAAAAAATATGTACAATTCAATGTATTGGAGGTACTGGTGCTATTTTTGTTTTATTAGAATTTTTAAAAATGTTAAATGTTGAAACTTTATATGTTACAAATCCACCTTATATT…	MDKLLSSLENIEVDNILKTAREFKEDTCEEKINLSIGVCCNDDGDLHIFDSVLNADKLVTENYKEKPYLLGNGTEDFSTLTQNLIFGNNSKYIEDKKICTIQCIGGTGAIFVLLEFLKMLNVETLYVTNPPYINHVNMIESRGFNLKYINFFDYNLIDINYDLFLNDLRNIPNGSSVILQISCYNPCSVNIEEKYFDEIIEIVLHKKHVIIFDIAYQGFGHTNLEEDVLLIRKFEEKNIAFSVCQSFSKNMSLYGERAGALHIVCKNQEEKKIVFNNLCFIVRKFYSSPVIHTNRILCQLLNNQNLKLNWIKELSQLSQRITNNRILFFNKLETYQKKYNLNYDWNVYKKQRGLFSFVPLLAKIAEHLKTHHIYIINNGRINVSGITKNNVDYIADKIC…	405	0	null	no	GO_0009058	GO_0006520	GO_0009058,GO_0006520	0	0	0	0	0	0	0	0	0	0	0	0	0	0	0	0	0	0	0	0	0	0	0	0	0	0	0	0	0	0	0	0	0	0	0	0	0
4881	PF3D7_1430700	NADP-specific glutamate dehydrogenase	GDH2	ATGATTTTGTATTCATGTGTTGTTTGTTTTATTGTTTTTGTTTTTCATGTGAAGGCATATTCCAAAAATAAAGTTCTTAAATATGCTAAACCAGGTTTTATTACAAATGAAATTGATATAGGGGCGTATGCAAAGAGAAGAGGAAAAAGTAGACTAGGTAGTCTACACAACTACGGCTATACTTCTACCAAATCTGTAGATAACCAAATTGAAGAATTACGAGAAAAGGTTGTATCTAAAAATAAAAACGAACCAGAATTTCTTCAAGCGTTTGAAGAAGTATTATCATGTTTAAAGCCAGTGTTTAAAAAAGACAATGTATATATAGGAGTACTAGAAAATATCGCCGAACCAGAAAGGGTAATTCAATTTCGTGTACCTTGGATAAATGATAAAGGA…	MILYSCVVCFIVFVFHVKAYSKNKVLKYAKPGFITNEIDIGAYAKRRGKSRLGSLHNYGYTSTKSVDNQIEELREKVVSKNKNEPEFLQAFEEVLSCLKPVFKKDNVYIGVLENIAEPERVIQFRVPWINDKGEHKMNRGFRVQYNSVLGPYKGGLRFHPTVNLSVIKFLGFEQIFKNSLTTLPMGGGKGGSDFDPKGKSENEILKFCQSFMTNLFRYIGPNTDVPAGDIGVGGREIGYLFGQYKKLKNSFEGVLTGKNIKWGGSNIRAEATGYGVVYFAENVLKDLNDNLENKKCLVSGSGNVAQYLVEKLIEKGAIVLTMSDSNGYILEPNGFTKEQLNYIMDIKNNQRLRLKEYLKYSKTAKYFENQKPWNIPCDIAFPCATQNEINENDADLFIQ…	510	0	HMM: MILYSCVVCFIVFVFHVKAY, NN: MILYSCVVCFIVFVFHVKAYSK	yes	GO_0006520, GO_0055114	GO_0006520, GO_0006537	GO_0006520,GO_0055114,GO_0006520,GO_0006537	0	0	0	0	0	0	0	0	0	0	0	0	0	0	0	0	0	0	0	0	0	0	0	0	0	0	0	0	0	0	0	0	0	0	0	0	0
1609	PF3D7_0716600	cysteine desulfurase	SufS	ATGTTAAGAGGCCCTAGATGTCTCTACATATATTTATTTTTTGTATTTCTTCCTTTTTCTTTTTGCTATATAAGAAATAATGATAATCGTTTTGTGTATATTGTGAAATCGATAAGAAAGGGTCCTAATATAAAATTAAGATTGACAAAAGATGAAAAGCCTAATATAGATAATCATATAATAGATTATTTTAAAAATGTAAGAGAACATTTTCCTTTCTTTAAAGAAAATAAATCGTTGATATATTTTGATAGTGCAGCTACAACACACAAACCTAGTTGTGTGATAGAGAAAATGAGTGAGTTTTATAAAAAGGAAAACTCGAATATTCATCGAGGAATTTACAAACTAAGCCACAATGCCACAAATAATTATGAAAAGGTAAGAGAAACAATAAAA…	MLRGPRCLYIYLFFVFLPFSFCYIRNNDNRFVYIVKSIRKGPNIKLRLTKDEKPNIDNHIIDYFKNVREHFPFFKENKSLIYFDSAATTHKPSCVIEKMSEFYKKENSNIHRGIYKLSHNATNNYEKVRETIKEYINCEKNDNIIFTNGSTYGLNVVCKMMIEEIIKKEEDEIYLSYMEHHSNIIPWQEYINKEKKGRIKYVPLNKSGYINIKKLISNMNINTKVISICHASNVIGNIQNIEKIIKKIKNVYPHIIIIIDASQSFAHIKYDIKKMKKNKSCPDILITSGHKFCASLGTGFIFINKELSSKYKFKPLLYGSNIITNVSKYKSKFVTSLSELLETGTQNIPGILSMGISLEFFKKINWNYVYQYEMYLYDLFIYYMNKYMKNHFVQLPNLN…	546	1	HMM: MLRGPRCLYIYLFFVFLPFSFCY, NN: MLRGPRCLYIYLFFVFLPFSFCY	yes	GO_0008152	GO_0006534	GO_0008152,GO_0006534	0	0	0	0	0	0	0	0	0	0	0	0	0	0	0	0	0	0	0	0	0	0	0	0	0	0	0	0	0	0	0	0	0	0	0	0	0
1708	PF3D7_0727200	cysteine desulfurase, putative	NFS	ATGAAATTTCTTCAAATAATAAAACATCTCAAATTACAAAACAAAAAGAACGCACTCGATAATTTTGTAAATTGTCGTACCTATGAACATATCAGTAATATTAACAAATTATTCCTCAATAACTTTAGTTCCACGAAGGAACATTCTGAACATGGTCAGGTAAAACATGAAAACTTCCTGAACAGTACATTAAAATATGAAGAAAACAGCCAAAATGGGTCAACAAATAATTTAAAGAATGGAAAGTACAATATGTATGTTTCTGAAGGAAATGTTAATATAAATGAAGAGAAATATAAAGATAACAATATATCTAGTAATAATACTCAATATAATAATAATAGTAGTAATTCTGGTAGTTTGAATGATGAAGGACCACTATGGAAAGAGCACATTGAT…	MKFLQIIKHLKLQNKKNALDNFVNCRTYEHISNINKLFLNNFSSTKEHSEHGQVKHENFLNSTLKYEENSQNGSTNNLKNGKYNMYVSEGNVNINEEKYKDNNISSNNTQYNNNSSNSGSLNDEGPLWKEHIDDVVNENKKKKMNRFYLDSQATTMIDPRVLDKMLPYMTYIYGNAHSRNHFFGWESEKAVEDARTNLLNLINGKNNKEIIFTSGATESNNLALIGICTYYNKLNKQKNHIITSQIEHKCILQTCRFLQTKGFEVTYLKPDTNGLVKLDDIKNSIKDNTIMASFIFVNNEIGVIQDIENIGNLCKEKNILFHTDASQAAGKVPIDVQKMNIDLMSMSGHKLYGPKGIGALYIKRKKPNIRLNALIHGGGQERGLRSGTLPTHLIVGFGE…	553	0	null	no	GO_0008152	GO_0006534	GO_0008152,GO_0006534	0	0	0	0	0	0	0	0	0	0	0	0	0	0	0	0	0	0	0	0	0	0	0	0	0	0	0	0	0	0	0	0	0	0	0	0	0
1778	PF3D7_0802000	glutamate dehydrogenase, putative	GDH3	ATGGATATTGATAGAAGGTCGGCATTAAGTTGCTCCCCCAATAACATGGAGTGCGGATTCGGTAGCGGGCATTTTTCTAATAACAGTATTACGTGGAAAGAGAAATATGAACAGACTAAAGAATTGTTGAAGAGTTATAATTTATTTTCAGATCATTTAATAAATTATAGTATCGATTTTTATTTTAACAAGTTAGGATTTAACAAGTTTCATTTTGAAGAGACAAGCCCCGAGTTGATTAGTAAAGTGGTTGTGTGTATTATAACTGCCAAGATTAATGAACAGTATTCTAGTGATAAATATTTTCCTACTTTCGAAGAGACCCATGACAATGTAATATTTATAATAACAAGAGTATTTGCTGATGATAATAAAACAAGATTAAATTATAAGATGGAG…	MDIDRRSALSCSPNNMECGFGSGHFSNNSITWKEKYEQTKELLKSYNLFSDHLINYSIDFYFNKLGFNKFHFEETSPELISKVVVCIITAKINEQYSSDKYFPTFEETHDNVIFIITRVFADDNKTRLNYKMEKKIEEKYFNFSDMSKDCYRLKSFRSVHSVFDKEHTYQEPLRTYILELPTYNDDIIKENETDLKKLMDVNFYNYIKGTRSEQIYYELNKAVLYDLTGQFLQTHYYETSSSTFTLTIAVKRSNVISSIFSLIGDCLNMHRCFSYSKYVEPLKNGVLLIILNVKVIVNNEMEREKQKLDLKDKIYKVVKSLKTLCLFNDSKFIQLSVKRTFTAQESAYLFMIIKFITFFSTNTLSSYKNVEHALNLRNYNNNIMDTTTNSSSSPSSVLN…	1397	0	null	no	GO_0006520, GO_0055114	GO_0006536	GO_0006520,GO_0055114,GO_0006536	0	0	0	0	0	0	0	0	0	0	0	0	0	0	0	0	0	0	0	0	0	0	0	0	0	0	0	0	0	0	0	0	0	0	0	0	0
4754	PF3D7_1416500	NADP-specific glutamate dehydrogenase	GDH1	ATGAGTGCTCTTAAAGACAAAACGGGAAGGTTTGTTGTTCTGGATAAAAATGCTAGCAACTATGAATCTTTAGTCGATCAAGAAATGAATAACGTATATGAAAGAGTTATGAAATTGGATCCTAACCAAGTTGAATTTTTGCAAGCATTTCATGAAATATTATATTCTTTAAAACCATTATTTATGGAAGAACCTAAATATTTACCAATAATTGAAACGTTATCAGAACCTGAACGAGCAATACAATTTCGTGTTTGTTGGTTAGATGATAATGGTGTTCAAAGAAAAAATCGTTGTTTTCGTGTTCAATATAATAGTGCCTTGGGTCCTTACAAAGGTGGTTTACGATTTCATCCATCAGTTAATTTATCTATTGTAAAATTTTTAGGATTTGAACAA…	MSALKDKTGRFVVLDKNASNYESLVDQEMNNVYERVMKLDPNQVEFLQAFHEILYSLKPLFMEEPKYLPIIETLSEPERAIQFRVCWLDDNGVQRKNRCFRVQYNSALGPYKGGLRFHPSVNLSIVKFLGFEQIFKNSLTGLSMGGGKGGSDFDPKGKSDNEILKFCQAFMNELYRHIGPCTDVPAGDIGVGGREIGYLYGQYKKIVNSFNGTLTGKNVKWGGSNLRVEATGYGLVYFVLEVLKSLNIPVEKQTAVVSGSGNVALYCVQKLLHLNVKVLTLSDSNGYVYEPNGFTHENLEFLIDLKEEKKGRIKEYLNHSSTAKYFPNEKPWGVPCTLAFPCATQNEINLEDAKLLQKNGCILVGEGANMPSTVDAINLFKSNNIIYCPSKAANAGGVA…	470	0	null	no	GO_0006520, GO_0055114	GO_0006536	GO_0006520,GO_0055114,GO_0006536	0	0	0	0	0	0	0	0	0	0	0	0	0	0	0	0	0	0	0	0	0	0	0	0	0	0	0	0	0	0	0	0	0	0	0	0	0
4525	PF3D7_1365500	aminomethyltransferase, mitochondrial, putative	GCVT	ATGAAGAATATTTTTAAATATAAAAATAGATTAACCTTTTTTAGAAAAGGTTTCTCAACAACTAATAAGCCAAAGGTGGAAATAAAAAAAACCATACTGTATGATTCACATAAGAAGAATAATGCAATTTTTAAGATACAACATGGTTTCTATTTACCAGACGAATACAAAGACATCACGTTGATTACCTCGAATTTGCATACTCGAACAAACTGTTCATTATTTGATTATACCTATAGACCTATATTAAAAATAAGTGGGGAGGATAAAATAAATTTCATTGAAAAATATGTAGGTAGTGATATTAAAGGATTATGGGAAAATGAATGTAGAATTAGTTTACTGTTAAATGACAAAGGTGGTATTATAGACGATATTATGATTATACTTCGAGAGAAA…	MKNIFKYKNRLTFFRKGFSTTNKPKVEIKKTILYDSHKKNNAIFKIQHGFYLPDEYKDITLITSNLHTRTNCSLFDYTYRPILKISGEDKINFIEKYVGSDIKGLWENECRISLLLNDKGGIIDDIMIILREKYLLLYLNIQCKEKVYKYLKDKLLENGKLQVQIEEFTSHSSICIQGSKSSDVLKELIDYNNESVETNLDNCSFMSSTLTKINKIDNCILNRYTCTGEDGFDILIPNKYVNDLYNLILKNELVKPGGLAVQNTLRLESGFCEYGKDINEDITPIESNYKWSLGQRRLKELNFNGAHIIMDQIKNGTKIKRVGILINTNIVPKENTKIYSHENAEQIIGYITSSVFSPVLQKPICMGYVKSEYAHINNLIKVDCLNKLEIAQITKLPFV…	406	0	null	no	GO_0006546	GO_0006546	GO_0006546,GO_0006546	0	0	0	0	0	0	0	0	0	0	0	0	0	0	0	0	0	0	0	0	0	0	0	0	0	0	0	0	0	0	0	0	0	0	0	0	0
2303	PF3D7_0922200	S-adenosylmethionine synthetase	SAMS	ATGAGTCAGTTGAAAATTAAAAGAGGAAACTTTTTATTCACATCTGAATCAGTGAATGAAGGACACCCAGATAAAATATGTGACCAGATATCTGATGCTATTTTAGATAGTTGTTTACGTGAGGATCCATATAGCAAGGTTGCATGTGAAGTATGTGCTAAAAAGAATTATATTTTTATATTTGGAGAAATAACTACAAAGGCTAAGGTAAATTATGACAAAGTTACACGAGACGTATTAAAACACATTGGTTATGATGATGAAAGTAAAGGTTTAGATTACAAAACGGCAGAGATAAAAGTATCTATAGATGAACAATCTCCTGATATAGCTCAATGTGTACATGAAAATAGGTCACCAGAATTAATAGGAGCAGGAGATCAAGGAATTATGTTTGGT…	MSQLKIKRGNFLFTSESVNEGHPDKICDQISDAILDSCLREDPYSKVACEVCAKKNYIFIFGEITTKAKVNYDKVTRDVLKHIGYDDESKGLDYKTAEIKVSIDEQSPDIAQCVHENRSPELIGAGDQGIMFGYATDETENYMPLTHHYATLLGKRLTEVRKLGILPYLGPDGKTQITIEYKNKGSCGGHLEPLRVHTVLISTQHAEDIKYEQLKTDLMENVIKYVIPEKLLDNETLYYLNPSGKFVLGGPAADAGLTGRKIICDTYGGWGAHGGGAFSGKDASKVDRSAAYYLRFIAKSLVANKFCRRVLVQASYSIGIANPISLNVNSYGTVSTGYTDYDLEQIILRNFDLRPGFIIQELKLTEPVFSKTSAYGHFGREGDTFTWEKIKDLSHEKNA…	402	0	null	no	GO_0006556	GO_0006556, GO_0045454	GO_0006556,GO_0006556,GO_0045454	0	0	0	0	0	0	0	0	0	0	0	0	0	0	0	0	0	0	0	0	0	0	0	0	0	0	0	0	0	0	0	0	0	0	0	0	0
4451	PF3D7_1357900	pyrroline-5-carboxylate reductase, putative	null	ATGGAAAATATAAAATTAGGTTTTATGGGTCTTGGTCAAATGGGATCTGCATTAGCCCATGGAATAGCAAATGCAAATATCATAAAGAAGGAAAATTTATTTTACTATGGACCATCTAAAAAAAATACTACCTTGAATTATATGAGTTCCAATGAAGAACTTGCACGCCATTGTGATATAATTGTATGTGCCGTAAAACCCGATATAGCTGGTTCTGTATTGAATAATATTAAGCCCTACTTATCATCCAAATTGTTAATATCAATATGCGGTGGATTAAACATTGGAAAATTGGAAGAGATGGTAGGAAGTGAAAACAAAATCGTGTGGGTTATGCCCAATACACCATGTTTAGTAGGTGAAGGATCTTTCATATATTGTTCCAATAAAAATGTAAAC…	MENIKLGFMGLGQMGSALAHGIANANIIKKENLFYYGPSKKNTTLNYMSSNEELARHCDIIVCAVKPDIAGSVLNNIKPYLSSKLLISICGGLNIGKLEEMVGSENKIVWVMPNTPCLVGEGSFIYCSNKNVNSTDKKYVNDIFNSCGIIHEIKEKDMDIATAISGCGPAYVYLFIESLIDAGVKNGLSRELSKNLVLQTIKGSVEMVKKSDQPVQQLKDNIVSPGGITAVGLYSLEKNSFKYTVMNAVEAACEKSKAMGSK	262	0	null	no	GO_0055114, GO_0006561	GO_0006561	GO_0055114,GO_0006561,GO_0006561	0	0	0	0	0	0	0	0	0	0	0	0	0	0	0	0	0	0	0	0	0	0	0	0	0	0	0	0	0	0	0	0	0	0	0	0	0
2797	PF3D7_1033100	S-adenosylmethionine decarboxylase/ornithine decarboxylase	AdoMetDC/ODC	ATGAACGGAATTTTTGAAGGAATTGAAAAAAGGGTTGTGATCAAATTAAAGGAGAGTTTTTTCAAAGGAAATAGAAATGTGAACTCCTTTTTAGATATACCTAAAGAATTATGGGAAGAAAAATTAAAATACATTGGTTGTAGTATTGTATCGGAAATAAGTGAGGACAAGAACGAGAGAAGAGGTGAACGATGTCGTGTGTATTTATTGTCAGAGAGTTCTTTATACATTTTTGATGATTCTTTATTTATTAAGACATGTGGCAAAACAAGAGTTTTATTTTTCATACCGTTTGTGGTTGATTTATTAATATATCATATGGATAATGTAGGTATAATAGAAAAGAATTGTGTATATGATGAGACGTTTATTGAAAACGAGAAATTCCATAATATAGCT…	MNGIFEGIEKRVVIKLKESFFKGNRNVNSFLDIPKELWEEKLKYIGCSIVSEISEDKNERRGERCRVYLLSESSLYIFDDSLFIKTCGKTRVLFFIPFVVDLLIYHMDNVGIIEKNCVYDETFIENEKFHNIAEFIKEHFLYCFFTHMNYRNKTKDGYFEQEYPHKSLEDEKKFFEFFFKNVQMYNTHLPMEKMHYIFFYSSDDVHMTDIASTFKFCSEIHLFGINKYNEKNQFHDAYLNNKSLNLFTRVHEDNLKLYDSSDADKEVTTHIYSTRGTYEDTGMVNCVDVIYKNESTLLNRNNIENIPSIENKESNNNSRCCHNNNYSGSCHNIVSVVPSERNNDHVHHRHYEDTLNRSNISAEDNNRNAQLEKEKDEDVRRDDEENKVLIKMIDTNLYE…	1434	0	null	no	GO_0008295, GO_0006597	GO_0006596, GO_0009445	GO_0008295,GO_0006597,GO_0006596,GO_0009445	0	0	0	0	0	0	0	0	0	0	0	0	0	0	0	0	0	0	0	0	0	0	0	0	0	0	0	0	0	0	0	0	0	0	0	0	0
4711	PF3D7_1412300	nuclear transport factor 2, putative	NTF2	ATGGATATGCTCAATCCACAATTTGAAGAAATAGGCAAGGAATTTGTTAATCACTACTTTCAGTTATTTAACAGTGGAAGGAATGAATTGGCTGCATTATATAAAGATATAAGTATGATGAGTTTTGAAAATGATCAATGTAGAGGAACAAGTCAAATAATAGAAAGATTAAATAAATTACCACCTACGGTTGTCCATAAATGTTTAAGTTTAGATATACAACCAACTCCAAATAATGGAATCTTAATATTAGTATGTGGAGATATTATTATTGAAGAAAATAAACCATTAAAATTCTGTAGAAGTTTTCACCTTTTCCCATTACCAAGTGGTGGATATTTTATTTTCAATGACTTATTCAGATTTTGCATCAGTTAA	MDMLNPQFEEIGKEFVNHYFQLFNSGRNELAALYKDISMMSFENDQCRGTSQIIERLNKLPPTVVHKCLSLDIQPTPNNGILILVCGDIIIEENKPLKFCRSFHLFPLPSGGYFIFNDLFRFCIS	125	0	null	no	GO_0006810	GO_0006606	GO_0006810,GO_0006606	0	0	0	0	0	0	0	0	0	0	0	0	0	0	0	0	0	0	0	0	0	0	0	0	0	0	0	0	0	0	0	0	0	0	0	0	0
1420	PF3D7_0627700	transportin	null	ATGAATAATAGTTATTTTGAAAATAATAATACATATATGGAATGGAAATTAGACGAAAAGATATATAAAACAATAGTAGGAGCTTTAGGTTCTTGTAATAGTTCAAATAATAGTGTACAAGTAGAAGTAACAAAGGTATTAAAAGATTTAAATGAGAATGTAGCCGATGCTGCTTTATATTTATTACATATATTTATGAATAAACAAGAAAATAATGATGTAAGGCAGGTGGGTGGTTTATTATTAAAGAATTATATAAATTCAAAAAACAAGTTTTTGAGTAATGATATATTAAAAATAATAAAGAATGAAATATTTAAATTAGTAGAGGACGAAGTAAAGGAAATAAGAAATACATCAGGATCTGTTATAACTACTATATTAACAAAATATGAAGGA…	MNNSYFENNNTYMEWKLDEKIYKTIVGALGSCNSSNNSVQVEVTKVLKDLNENVADAALYLLHIFMNKQENNDVRQVGGLLLKNYINSKNKFLSNDILKIIKNEIFKLVEDEVKEIRNTSGSVITTILTKYEGIEQWPEALYNLLLLIERGNNDVVDGAFRAILIIIEDELMNRKNRDSLFFQFCKSQLLQKLFQFCSPQEKNIKKKYAAECLDLFITSSCFTTNGVFNDMFAQLWECLGYLASEEDPQILKIVVSCMTIITDTRYSSIFSNLDAIIQFMVNATNSNDRKVQLEALEFWPIFIKDRSYVAYASYNNPKSDINKSDSNYIDENVYKNINELRTEALKRLKNYLPYLCKILIDNTVYTKWDYLAMDESHFQNDNANVPDLIQDISPELYNN…	1147	0	null	no	GO_0006886	GO_0006606	GO_0006886,GO_0006606	0	0	0	0	0	0	0	0	0	0	0	0	0	0	0	0	0	0	0	0	0	0	0	0	0	0	0	0	0	0	0	0	0	0	0	0	0
1905	PF3D7_0815200	importin beta, putative	null	ATGGAATCAAGCAACATTGGTCAGATTTTATACGCTACTGTAGATCCCAATATAAATATTCGTTCAGAAGCAGAGAATAAATTAAAATTAGCTAAGGAAAGTAATTTTGTACAATATATAAATCAATTATCGAATGAATTTTGTAAGAGTGAGAATGATCCATATTTAAGACAAATAGCCGGTTTATTAATAAAGAATGCTTTTACTTCGAAAGATAATTATGAAAGTGAAGAAAAAGCTAGGACATGGCTAAATTTTCCAGAAGATATAAAGATGGAATTAAAAAATAATTTATTAGTTTTGTTAAGTCAACAAAGTGATAAGATAGTTATAGGAACTGCTTGTCAAATAATATCTATAATAGCTAAGATTGAATTATCACATAATAAATCATCTGAA…	MESSNIGQILYATVDPNINIRSEAENKLKLAKESNFVQYINQLSNEFCKSENDPYLRQIAGLLIKNAFTSKDNYESEEKARTWLNFPEDIKMELKNNLLVLLSQQSDKIVIGTACQIISIIAKIELSHNKSSELLHKLVNNIIEKNAYTKKSSTVCLAYLTEDIADVCNESKSKYAFTQPDLDLILTAIINSLCEPAEESTHCANMKVLYNLMSFIEHNFKTQVERDIIMKTVIDGCKDTERQSVQIAAYECLINIVSYFYSYLDAYMYAIGPLTWVAIESENERIAISAIEFWNTVCEEETFIDQYELQEGKKNHNIVKQAMVFLLPKIFNAMITQESEDIDIDAWTLSMASATFLALSAQLLKNDIVEPVISFVEENFIHEDWRRRDAAVLAYGSIM…	877	0	null	no	GO_0006886	GO_0006607	GO_0006886,GO_0006607	0	0	0	0	0	0	0	0	0	0	0	0	0	0	0	0	0	0	0	0	0	0	0	0	0	0	0	0	0	0	0	0	0	0	0	0	0
[truncated: 4,971 more rows]
[truncated: 2,548 more columns]
