# Supplementary material for: Proteome-wide analysis of a malaria vaccine study reveals personalized humoral immune profiles in Tanzanian adults
Source: eLife. 2020 Jul 14;9:e53080. doi: 10.7554/eLife.53080 (PMC7386907; doi:10.7554/eLife.53080)
Supplement: Supplementary file 1. — This table lists Pfam protein family prediction (El-Gebali et al., 2019), and gene ontology prediction available on Plasmodb.org (Huntley et al., 2015) and identified protein characteristics and distinct functional categories which were identified as being reactive in at least 80% of the protected or non protected group before and after immunization. Reactive proteins were associated to each group using the Fisher’s exact test, and p value correct using the Benjamini-Hochberg method (BH) (Benjamini and Hochberg, 1995). Pfam and GO description were found in https://www.ebi.ac.uk/QuickGO/ and https://biocyc.org/ and https://www.ebi.ac.uk/QuickGO/ and https://biocyc.org/, respectively. See also Source datas 1–4. [file elife-53080-supp1.xlsx]

## Sheet: Sheet1
		Before immz		After immz		name	definition
		Protected (n=5)	Non prototected (n=33)	Protected (n=5)	Non prototected (n=33)
GOcomponent
GO:0016021		X	X	X	X	integral component of membrane	The component of a membrane consisting of the gene products and protein complexes having at least some part of their peptide sequence embedded in the hydrophobic region of the membrane.
GO:0020002		X	X	X	X	host cell plasma membrane	The plasma membrane surrounding a host cell
GO:0020030		X	X	X	X	infected host cell surface knob
GO:0020036		X	..	X	..	Maurer's cleft	A disk-like structure that appears at the periphery of a red blood cell infected by an apicomplexan parasite, characterized by a translucent lumen and an electron-dense coat of variable thickness; often appears to be tethered to the host cell membrane by fibrous connections with the erythrocyte cytoskeleton.
Gofunction
GO:0004872		X	X	X	X	signaling receptor activity	Receiving a signal and transmitting it in the cell to initiate a change in cell activity. A signal is a physical entity or change in state that is used to transfer information in order to trigger a response.
GO:0046789		X	..	X	..	host cell surface receptor binding	Interacting selectively and non-covalently with a receptor on the host cell surface.
GO:0050839		X	X	X	X	cell adhesion molecule binding	Interacting selectively and non-covalently with a cell adhesion molecule.
GOprocess
GO:0009405		X	X	X	X	pathogenesis	The set of specific processes that generate the ability of an organism to induce an abnormal, generally detrimental state in another organism.
GO:0016337		X	X	X	X	cell-cell adhesion	The attachment of one cell to another cell via adhesion molecules.
GO:0020013		X	X	X	..	modulation by symbiont of host erythrocyte aggregation	Any process in which a symbiont organism modulates the frequency, rate or extent of erythrocyte aggregation in its host organism, e.g. the binding of parasite-infected erythrocytes to uninfected erythrocytes. PMID:19467172 PMID:21305024
GO:0020033		X	X	X	X	antigenic variation	Any process involved in the biological strategy of changing antigenic determinants on the surface that are exposed to another organism's immune system.
GO:0020035		X	X	X	X	cytoadherence to microvasculature, mediated by symbiont protein	The adherence of symbiont-infected erythrocytes to microvascular endothelium via symbiont proteins embedded in the membrane of the erythrocyte.
GO:0050776		X	..	X	..	regulation of immune response	Any process that modulates the frequency, rate or extent of the immune response, the immunological reaction of an organism to an immunogenic stimulus.
Pfmatrix
PF02009		X	..	X	..	Rifin	Rifin
PF03011		X	X	X	X	PFEMP	PFEMP DBL domain
PF05424		X	X	X	X	Duffy_binding	Duffy binding domain
PF05658		X	..	X	..	YadA_head	Head domain of trimeric autotransporter adhesin
PF05887		X	..	X	..	Trypan_PARP	Procyclic acidic repetitive protein (PARP)
PF06424		X	..	X	..	PRP1_N	PRP1 splicing factor, N-terminal
PF15445		X	X	X	X	ATS	acidic terminal segments, variant surface antigen of PfEMP1
PF15447		X	X	X	X	NTS	N-terminal segments of PfEMP1
