# Supplementary material for: Proteome-wide analysis of a malaria vaccine study reveals personalized humoral immune profiles in Tanzanian adults
Source: eLife. 2020 Jul 14;9:e53080. doi: 10.7554/eLife.53080 (PMC7386907; doi:10.7554/eLife.53080)
Supplement: Table 1—source data 1. [file elife-53080-table1-data1.xlsx]

## Sheet: Deeploc_all_reactive_genes_loca
Gene ID	Description	Localization	Type	Cell membrane	Cytoplasm	Endoplasmic reticulum	Extracellular	Golgi apparatus	Lysosome/Vacuole	Mitochondrion	Nucleus	Peroxisome	Plastid
PF3D7_0100100	erythrocyte membrane protein 1, PfEMP1	Nucleus	Soluble	0.1166	0.3277	0.0094	0.0005	0.0055	0.0128	0.0016	0.5223	0.0031	0.0004
PF3D7_0100200	rifin	Cell membrane	Membrane	0.7958	0.0003	0.1133	0.0039	0.0085	0.0119	0.0439	0.0033	0.0084	0.0107
PF3D7_0100300	erythrocyte membrane protein 1, PfEMP1	Nucleus	Soluble	0.0946	0.3097	0.0213	0.0036	0.016	0.0925	0.0253	0.3718	0.0581	0.0071
PF3D7_0100400	rifin	Cell membrane	Membrane	0.5191	0.0008	0.2524	0.0001	0.0238	0.0157	0.1131	0.0037	0.0223	0.0489
PF3D7_0100600	rifin	Endoplasmic reticulum	Membrane	0.3535	0	0.6018	0.0001	0.0397	0.0033	0.0011	0.0001	0.0001	0.0004
PF3D7_0100800	rifin	Cell membrane	Membrane	0.5862	0.0002	0.2991	0.0009	0.0103	0.0045	0.0406	0.0012	0.0036	0.0535
PF3D7_0100900	rifin	Cell membrane	Membrane	0.9162	0	0.055	0.0008	0.0015	0.0011	0.0037	0.0002	0.0007	0.0209
PF3D7_0101000	rifin	Cell membrane	Membrane	0.9719	0	0.0248	0	0.0022	0.0008	0.0001	0	0	0.0001
PF3D7_0101100	exported protein family 4	Endoplasmic reticulum	Membrane	0.2436	0.0001	0.6297	0.0001	0.1056	0.0088	0.0059	0.0026	0.0013	0.0023
PF3D7_0101300	Pfmc-2TM Maurer's cleft two transmembrane protein	Endoplasmic reticulum	Membrane	0.0304	0.0001	0.847	0.0005	0.1009	0.0012	0.013	0.0006	0.0027	0.0035
PF3D7_0101600	rifin	Cell membrane	Membrane	0.6932	0.0001	0.2871	0	0.0052	0.0038	0.0055	0.0004	0.0037	0.0009
PF3D7_0101800	stevor	Cell membrane	Membrane	0.9328	0	0.0392	0.0008	0.0078	0.0159	0.0028	0.0001	0.0003	0.0002
PF3D7_0101900	rifin	Cell membrane	Membrane	0.8809	0	0.1066	0	0.0064	0.0013	0.0039	0.0001	0.0004	0.0005
PF3D7_0102200	ring-infected erythrocyte surface antigen	Nucleus	Soluble	0.0011	0.0635	0.0086	0.0003	0.021	0.0029	0.0019	0.9	0.0005	0.0002
PF3D7_0102500	erythrocyte binding antigen-181	Golgi apparatus	Membrane	0.0624	0.0045	0.3708	0.0189	0.4828	0.0378	0.009	0.0135	0.0001	0.0002
PF3D7_0102600	serine/threonine protein kinase, FIKK family	Golgi apparatus	Membrane	0.0117	0.0009	0.261	0.0001	0.6551	0.0644	0.0045	0.0022	0.0001	0.0001
PF3D7_0102700	merozoite-associated tryptophan-rich antigen	Endoplasmic reticulum	Soluble	0.0034	0.0029	0.5958	0.133	0.0995	0.1466	0.0169	0.0012	0.0006	0.0002
PF3D7_0103400	zinc-carboxypeptidase, putative	Nucleus	Soluble	0.0084	0.065	0.0034	0.0007	0.0019	0.0006	0.0007	0.918	0.0013	0.0001
PF3D7_0103500	conserved Plasmodium protein, unknown function	Cytoplasm	Soluble	0.0068	0.6513	0.0492	0.001	0.0415	0.0795	0.0019	0.1658	0.0029	0
PF3D7_0103800	actin-related protein	Peroxisome	Soluble	0.0073	0.2734	0.0192	0.0049	0.0008	0.0142	0.0449	0.0092	0.6083	0.0176
PF3D7_0103900	parasite-infected erythrocyte surface protein	Endoplasmic reticulum	Membrane	0.0808	0.0007	0.4447	0.0005	0.3317	0.1376	0.0023	0.0014	0.0002	0
PF3D7_0104000	thrombospondin-related sporozoite protein	Cell membrane	Membrane	0.6299	0.0001	0.2546	0	0.0621	0.0043	0.043	0.0013	0.0043	0.0002
PF3D7_0104100	conserved Plasmodium membrane protein, unknown function	Lysosome/Vacuole	Membrane	0.2307	0.0018	0.1996	0	0.082	0.4822	0.0011	0.0019	0.0005	0
PF3D7_0104600	conserved Plasmodium protein, unknown function	Mitochondrion	Soluble	0.0015	0.1319	0.008	0.0008	0.0057	0.0024	0.7167	0.1243	0.008	0.0008
PF3D7_0105600	conserved Plasmodium protein, unknown function	Nucleus	Soluble	0.0014	0.1699	0.0175	0.0001	0.0148	0.0086	0.002	0.7846	0.0009	0.0002
PF3D7_0105700	asparagine-rich antigen Pfa35-2	Nucleus	Soluble	0.0033	0.3047	0.0012	0.0016	0.0057	0.0851	0.0005	0.5976	0.0002	0
PF3D7_0105900	3'-5' exonuclease, putative	Mitochondrion	Soluble	0.0027	0.1465	0.0419	0.0031	0.0414	0.0363	0.6337	0.0912	0.0017	0.0016
PF3D7_0106200	EF hand domain-containing protein, putative	Cytoplasm	Soluble	0.005	0.5181	0.028	0.0027	0.0241	0.0423	0.0136	0.3595	0.0058	0.001
PF3D7_0106500	conserved Plasmodium protein, unknown function	Nucleus	Soluble	0.002	0.3432	0.0015	0.0002	0.0042	0.0307	0.0007	0.6171	0.0004	0
PF3D7_0107900	conserved Plasmodium protein, unknown function	Endoplasmic reticulum	Soluble	0.004	0.0014	0.5794	0.3836	0.0029	0.0161	0.0113	0.0008	0	0.0004
PF3D7_0108000	proteasome subunit beta type-3, putative	Cytoplasm	Soluble	0.0469	0.2322	0.0385	0.0311	0.0171	0.1077	0.1379	0.1319	0.0488	0.2078
PF3D7_0108300	conserved Plasmodium protein, unknown function	Cytoplasm	Soluble	0.0037	0.6968	0.0025	0.0002	0.0099	0.0253	0.0005	0.2604	0.0006	0.0001
PF3D7_0108400	mitochondrial carrier protein, putative	Endoplasmic reticulum	Membrane	0.0538	0.003	0.5454	0.0001	0.0878	0.0052	0.2258	0.0027	0.0762	0.0003
PF3D7_0108600	conserved protein, unknown function	Mitochondrion	Membrane	0.0106	0.0123	0.0854	0.0004	0.0679	0.0048	0.7181	0.0776	0.0226	0.0004
PF3D7_0108700	secreted ookinete protein, putative	Endoplasmic reticulum	Membrane	0.0434	0.0207	0.676	0.0064	0.179	0.0382	0.0042	0.0308	0.001	0.0004
PF3D7_0108800	mitochondrial carrier protein, putative	Endoplasmic reticulum	Membrane	0.0112	0.0478	0.4918	0.0005	0.0261	0.0151	0.2247	0.0162	0.1657	0.001
PF3D7_0109200	cleavage and polyadenylation specificity factor subunit 5, putative	Cytoplasm	Soluble	0.0025	0.5163	0.0128	0.0026	0.0036	0.004	0.1896	0.2348	0.0292	0.0047
PF3D7_0109800	phenylalanine--tRNA ligase alpha subunit	Cytoplasm	Soluble	0.0044	0.5427	0.0135	0.0011	0.0098	0.0128	0.0078	0.3926	0.0144	0.001
PF3D7_0109950	conserved protein, unknown function	Endoplasmic reticulum	Membrane	0.0091	0.0423	0.4643	0.0136	0.0091	0.0045	0.2147	0.0128	0.2226	0.007
PF3D7_0110000	conserved Plasmodium protein, unknown function	Golgi apparatus	Membrane	0.0089	0.0018	0.3007	0.0049	0.6564	0.0113	0.0112	0.0044	0.0002	0.0002
PF3D7_0110500	bromodomain protein, putative	Nucleus	Soluble	0.0048	0.3226	0.0047	0.0008	0.0125	0.1371	0.001	0.5159	0.0005	0.0001
PF3D7_0110600	phosphatidylinositol-4-phosphate 5-kinase	Nucleus	Soluble	0.0024	0.2944	0.0018	0.0001	0.0024	0.0072	0.0007	0.6883	0.0026	0.0001
PF3D7_0110700	chromatin assembly factor 1 protein WD40 domain, putative	Nucleus	Soluble	0	0.0205	0.0001	0	0.0001	0.0002	0.0001	0.979	0	0
PF3D7_0110800	transcription initiation factor TFIIB, putative	Cytoplasm	Soluble	0.0098	0.2951	0.0162	0.0016	0.0135	0.0115	0.073	0.2754	0.1115	0.1925
PF3D7_0111000	kinesin-8, putative	Cytoplasm	Soluble	0.0054	0.666	0.0025	0.0002	0.0106	0.0247	0.0004	0.2887	0.0011	0.0003
PF3D7_0111300	P-loop containing nucleoside triphosphate hydrolase, putative	Nucleus	Soluble	0.0033	0.3983	0.0118	0.0003	0.0123	0.0142	0.0014	0.5565	0.0017	0.0003
PF3D7_0111500	UMP-CMP kinase, putative	Endoplasmic reticulum	Soluble	0.0058	0.0272	0.7888	0.0783	0.0078	0.0591	0.0262	0.006	0.0003	0.0005
PF3D7_0111700	conserved protein, unknown function	Mitochondrion	Soluble	0.0009	0.1699	0.0425	0.0104	0.0032	0.0089	0.7292	0.0334	0.0016	0
PF3D7_0112000	TatD-like deoxyribonuclease	Endoplasmic reticulum	Membrane	0.0126	0.0799	0.4447	0.0145	0.0746	0.0157	0.2666	0.0403	0.0469	0.0042
PF3D7_0112100	conserved Plasmodium protein, unknown function	Endoplasmic reticulum	Soluble	0.0032	0.0218	0.4566	0.1259	0.1893	0.1306	0.0462	0.0222	0.0024	0.0018
PF3D7_0112200	multidrug resistance-associated protein 1	Lysosome/Vacuole	Membrane	0.232	0.0005	0.1592	0	0.0825	0.5216	0.002	0.0017	0.0005	0
PF3D7_0113100	surface-associated interspersed protein 1.1 (SURFIN 1.1)	Cytoplasm	Soluble	0.0102	0.437	0.2314	0.0001	0.0433	0.0262	0.0335	0.1882	0.0248	0.0053
PF3D7_0113300	Plasmodium exported protein (hyp1), unknown function	Golgi apparatus	Membrane	0.006	0.0006	0.0223	0.0863	0.8556	0.0095	0.0026	0.0172	0	0
PF3D7_0113400	Plasmodium exported protein, unknown function	Endoplasmic reticulum	Membrane	0.0089	0.0318	0.5424	0.0004	0.2122	0.0284	0.0785	0.0894	0.0078	0.0002
PF3D7_0113800	DBL containing protein, unknown function	Nucleus	Soluble	0.008	0.1368	0.0388	0.0001	0.0348	0.062	0.0004	0.7181	0.0009	0.0001
PF3D7_0113900	CX3CL1-binding protein 1	Endoplasmic reticulum	Membrane	0.0875	0.0002	0.6959	0.0052	0.1362	0.0243	0.021	0.0017	0.0018	0.0264
PF3D7_0114000	exported protein family 1	Golgi apparatus	Membrane	0.0007	0.0115	0.1212	0	0.7723	0.0047	0.0288	0.0597	0.0001	0.0012
PF3D7_0114100	Pfmc-2TM Maurer's cleft two transmembrane protein	Endoplasmic reticulum	Membrane	0.0288	0.0004	0.8221	0.0005	0.1171	0.0033	0.0213	0.0008	0.0045	0.0013
PF3D7_0115000	surface-associated interspersed protein 1.3 (SURFIN 1.3)	Nucleus	Soluble	0.1017	0.235	0.0999	0	0.0553	0.0361	0.1124	0.2872	0.0299	0.0426
PF3D7_0115200	rifin	Cell membrane	Membrane	0.7985	0.0001	0.1857	0	0.0083	0.0029	0.0023	0.0003	0.0018	0.0002
PF3D7_0115300	rifin	Cell membrane	Membrane	0.9817	0	0.0167	0	0.0009	0.0004	0.0002	0	0	0
PF3D7_0115400	stevor	Cell membrane	Membrane	0.8309	0	0.1452	0.0002	0.0156	0.0066	0.0011	0.0001	0.0002	0.0002
PF3D7_0115700	erythrocyte membrane protein 1, PfEMP1	Nucleus	Soluble	0.0765	0.2246	0.0212	0.0002	0.0155	0.0141	0.001	0.645	0.0016	0.0004
PF3D7_0200100	erythrocyte membrane protein 1, PfEMP1	Nucleus	Soluble	0.0411	0.2376	0.0061	0.0002	0.0023	0.0021	0.0011	0.7018	0.0072	0.0005
PF3D7_0200200	rifin	Cell membrane	Membrane	0.6497	0.0003	0.2852	0.0001	0.009	0.0036	0.0192	0.0032	0.002	0.0277
PF3D7_0200400	stevor	Cell membrane	Membrane	0.6428	0.0001	0.2852	0.0003	0.0434	0.0177	0.0065	0.0004	0.0031	0.0005
PF3D7_0200500	rifin	Cell membrane	Membrane	0.9419	0	0.0544	0	0.002	0.0008	0.0005	0.0001	0.0001	0.0001
PF3D7_0200600	rifin	Cell membrane	Membrane	0.7571	0	0.2015	0.0001	0.0316	0.0071	0.0019	0.0001	0.0002	0.0005
PF3D7_0200700	rifin	Cell membrane	Membrane	0.8318	0.0001	0.1477	0.0001	0.0044	0.0038	0.0067	0.0003	0.0039	0.0011
PF3D7_0200800	erythrocyte membrane protein 1 (PfEMP1), exon 2, pseudogene	Endoplasmic reticulum	Soluble	0.0076	0.2858	0.2864	0.0033	0.0581	0.0725	0.0156	0.2485	0.0214	0.0009
PF3D7_0201000	rifin	Cell membrane	Membrane	0.7296	0	0.2213	0.0012	0.0106	0.0088	0.0151	0.0004	0.0012	0.0117
PF3D7_0201200	rifin	Cell membrane	Membrane	0.8341	0.0001	0.1101	0.0004	0.004	0.0027	0.0047	0.0012	0.0023	0.0405
PF3D7_0201300	stevor	Cell membrane	Membrane	0.9097	0	0.0682	0.0002	0.0103	0.0089	0.0023	0.0001	0.0002	0.0001
PF3D7_0201500	Plasmodium exported protein (hyp9), unknown function	Endoplasmic reticulum	Membrane	0.0978	0.0002	0.5487	0.0001	0.2646	0.0108	0.0615	0.0056	0.0097	0.0011
PF3D7_0201700	DnaJ protein, putative	Golgi apparatus	Membrane	0.0007	0.0551	0.1186	0.0002	0.4331	0.0046	0.0841	0.3024	0.0011	0.0001
PF3D7_0201800	knob associated heat shock protein 40	Golgi apparatus	Membrane	0.0052	0	0.0227	0.0003	0.9665	0.0012	0.0038	0.0001	0.0001	0.0001
PF3D7_0201900	erythrocyte membrane protein 3	Golgi apparatus	Membrane	0.1025	0.0138	0.0943	0.0022	0.5813	0.0135	0.0551	0.1368	0.0001	0.0004
PF3D7_0202000	knob-associated histidine-rich protein	Golgi apparatus	Membrane	0.178	0.0012	0.0119	0.1144	0.5615	0.0013	0.0339	0.0975	0.0002	0
PF3D7_0202300	Plasmodium exported protein (hyp11), unknown function	Endoplasmic reticulum	Membrane	0.0186	0.1374	0.5042	0.0236	0.0536	0.0371	0.0847	0.1175	0.021	0.0023
PF3D7_0202400	translation-enhancing factor	Endoplasmic reticulum	Soluble	0.0028	0.0414	0.5334	0.1776	0.0734	0.0026	0.0436	0.1251	0	0
PF3D7_0202500	early transcribed membrane protein 2	Extracellular	Soluble	0.0891	0.0077	0.0432	0.5544	0.0236	0.0113	0.2602	0.0038	0.005	0.0019
PF3D7_0202600	nucleic acid binding protein, putative	Cytoplasm	Soluble	0.0038	0.3642	0.0323	0.0007	0.1901	0.2097	0.0053	0.1932	0.0002	0.0005
PF3D7_0202700	octaprenyl pyrophosphate synthase	Mitochondrion	Soluble	0.0006	0.0817	0.0024	0.0005	0.002	0.0006	0.8247	0.0827	0.0041	0.0006
PF3D7_0203000	repetitive organellar protein, putative	Golgi apparatus	Soluble	0.0089	0.3272	0.016	0.0001	0.4137	0.0225	0.0017	0.2096	0.0001	0.0003
PF3D7_0203100	protein kinase, putative	Nucleus	Soluble	0.0018	0.3332	0.0013	0.0001	0.0064	0.014	0.0003	0.6426	0.0003	0
PF3D7_0203200	conserved Plasmodium protein, unknown function	Nucleus	Soluble	0.0077	0.2747	0.0223	0.0014	0.0526	0.0387	0.0083	0.5675	0.0265	0.0003
PF3D7_0203800	conserved Plasmodium protein, unknown function	Nucleus	Soluble	0.0052	0.1844	0.0101	0.0003	0.0114	0.0024	0.1109	0.6711	0.0022	0.002
PF3D7_0204100	Sel1 repeat-containing protein, putative	Endoplasmic reticulum	Soluble	0.0234	0.195	0.4562	0.0357	0.0702	0.1508	0.0116	0.0543	0.0022	0.0007
PF3D7_0204300	conserved Plasmodium protein, unknown function	Cytoplasm	Soluble	0.0073	0.524	0.0215	0.0003	0.0643	0.0256	0.0156	0.3392	0.0008	0.0014
PF3D7_0204500	aspartate transaminase	Cytoplasm	Soluble	0.0105	0.4897	0.0434	0.0112	0.0572	0.1541	0.0107	0.2103	0.004	0.0088
PF3D7_0204600	5'-3' exonuclease, putative	Extracellular	Soluble	0.0088	0.0038	0.3793	0.5034	0.0138	0.0818	0.0052	0.0037	0.0002	0.0001
PF3D7_0204800	3'-5' exonuclease, putative	Mitochondrion	Soluble	0.0396	0.1962	0.0588	0.0098	0.0701	0.0464	0.463	0.1027	0.0119	0.0015
PF3D7_0206000	DNA repair protein RAD2, putative	Nucleus	Soluble	0.0056	0.3086	0.0104	0.0004	0.0368	0.017	0.0134	0.6042	0.0025	0.0011
PF3D7_0206100	cysteine desulfuration protein SufE	Golgi apparatus	Membrane	0.0095	0.0012	0.1181	0.0042	0.8329	0.0097	0.0224	0.0011	0.0008	0.0002
PF3D7_0206200	pantothenate transporter	Lysosome/Vacuole	Membrane	0.1295	0.0003	0.1335	0	0.1084	0.6203	0.0052	0.0008	0.0017	0.0003
PF3D7_0206800	merozoite surface protein 2	Cell membrane	Membrane	0.7961	0.0002	0.0431	0.0326	0.1082	0.0071	0.0055	0.0051	0	0.0021
PF3D7_0206900	merozoite surface protein 5	Nucleus	Membrane	0.0208	0.0251	0.1326	0.0028	0.1374	0.0234	0.0041	0.6533	0.0004	0.0001
PF3D7_0207000	merozoite surface protein 4	Endoplasmic reticulum	Membrane	0.1471	0.0006	0.6595	0.0033	0.1351	0.0153	0.0066	0.0316	0.0001	0.0008
PF3D7_0207100	conserved Plasmodium protein, unknown function	Cytoplasm	Soluble	0.0029	0.5218	0.0012	0.0001	0.0033	0.0053	0.0006	0.4635	0.0011	0.0001
PF3D7_0207200	iron-sulfur assembly protein, putative	Mitochondrion	Soluble	0.0023	0.0115	0.0008	0.0063	0.0014	0.0013	0.9741	0.0014	0.0003	0.0006
PF3D7_0207300	serine repeat antigen 8	Extracellular	Soluble	0.02	0.2167	0.0043	0.3149	0.0035	0.0295	0.1225	0.1898	0.0046	0.0943
PF3D7_0207400	serine repeat antigen 7	Extracellular	Soluble	0.0067	0.0012	0.3017	0.5683	0.0084	0.1128	0.0004	0.0003	0	0
PF3D7_0207500	serine repeat antigen 6	Endoplasmic reticulum	Soluble	0.0374	0.1002	0.3148	0.3135	0.0261	0.0989	0.009	0.0984	0.0008	0.001
PF3D7_0207600	serine repeat antigen 5	Extracellular	Soluble	0.0016	0.0032	0.0752	0.8897	0.0003	0.0293	0.0002	0.0004	0	0
PF3D7_0207700	serine repeat antigen 4	Extracellular	Soluble	0.0152	0.0303	0.1122	0.7191	0.0159	0.1045	0.001	0.0018	0	0
PF3D7_0208000	serine repeat antigen 1	Extracellular	Soluble	0.0511	0.0293	0.2241	0.4862	0.0768	0.0911	0.0161	0.0237	0.0002	0.0014
PF3D7_0208100	conserved Plasmodium protein, unknown function	Nucleus	Soluble	0.0053	0.2068	0.0057	0.0001	0.0084	0.0069	0.0007	0.7635	0.0024	0.0001
PF3D7_0208700	conserved Plasmodium protein, unknown function, unspecified product	Cytoplasm	Soluble	0.0099	0.4874	0.0198	0.0052	0.0323	0.037	0.0699	0.3227	0.0137	0.0021
PF3D7_0208900	6-cysteine protein P230p	Endoplasmic reticulum	Soluble	0.0365	0.1985	0.3476	0.0109	0.0952	0.1566	0.0463	0.0995	0.0055	0.0035
PF3D7_0209100	patatin-like phospholipase, putative	Cytoplasm	Soluble	0.0079	0.4921	0.0328	0.0038	0.02	0.0586	0.0088	0.3096	0.0652	0.0013
PF3D7_0209300	2C-methyl-D-erythritol 2,4-cyclodiphosphate synthase	Endoplasmic reticulum	Membrane	0.0189	0.0097	0.7028	0.0582	0.0863	0.0686	0.0368	0.0021	0.0075	0.0092
PF3D7_0209400	conserved protein, unknown function	Cytoplasm	Soluble	0.0087	0.3828	0.078	0.0068	0.1146	0.3084	0.0049	0.0948	0.0008	0.0002
PF3D7_0209800	ATP-dependent RNA helicase UAP56	Nucleus	Soluble	0.0024	0.4165	0.0037	0.0005	0.0068	0.0142	0.0034	0.5479	0.003	0.0016
PF3D7_0210200	conserved Plasmodium protein, unknown function	Nucleus	Soluble	0.0008	0.2397	0.0014	0	0.0034	0.0094	0.0002	0.745	0.0002	0
PF3D7_0210300	monocarboxylate transporter, putative	Golgi apparatus	Membrane	0.062	0	0.2556	0	0.5274	0.1544	0.0006	0	0	0
PF3D7_0210600	conserved protein, unknown function	Endoplasmic reticulum	Membrane	0.0219	0.0406	0.7401	0.0303	0.0159	0.0636	0.0421	0.0371	0.0024	0.0061
PF3D7_0210700	syntaxin, Qa-SNARE family	Endoplasmic reticulum	Membrane	0.0283	0.0053	0.6284	0	0.2319	0.0819	0.0061	0.015	0.0027	0.0004
PF3D7_0211100	conserved Plasmodium protein, unknown function	Cytoplasm	Soluble	0.003	0.4412	0.0723	0.0005	0.0547	0.0106	0.2126	0.1987	0.0063	0.0003
PF3D7_0211200	ras-related protein Rab-5A	Cytoplasm	Soluble	0.0999	0.3112	0.0628	0.0531	0.1619	0.1035	0.051	0.1291	0.0201	0.0073
PF3D7_0211300	ubiquinol-cytochrome-c reductase complex assembly factor 1, putative	Mitochondrion	Membrane	0.0011	0.0798	0.0384	0.0007	0.0133	0.0014	0.8395	0.0138	0.012	0.0001
PF3D7_0211900	pseudouridine synthase, putative	Mitochondrion	Soluble	0.0005	0.0675	0.0023	0.0002	0.0032	0.0005	0.7134	0.2086	0.0035	0.0002
PF3D7_0212200	ribosomal protein L12, mitochondrial, putative	Mitochondrion	Soluble	0.0001	0.0099	0.0001	0.0001	0.0001	0	0.9326	0.0569	0.0001	0
PF3D7_0212300	peptide chain release factor subunit 1, putative	Cytoplasm	Soluble	0.0087	0.6393	0.0058	0.0049	0.0012	0.1968	0.004	0.0273	0.0919	0.0202
PF3D7_0212400	conserved Plasmodium membrane protein, unknown function	Cytoplasm	Soluble	0.0074	0.5088	0.0635	0.0007	0.0342	0.228	0.0011	0.1545	0.0017	0.0001
PF3D7_0212500	conserved Plasmodium protein, unknown function	Nucleus	Soluble	0.0017	0.3565	0.002	0	0.0037	0.0104	0.0002	0.6253	0.0003	0
PF3D7_0212700	SRR1-like protein	Nucleus	Soluble	0.0029	0.3246	0.011	0.0016	0.0042	0.0943	0.0014	0.558	0.002	0.0001
PF3D7_0212900	arginyl-tRNA--protein transferase	Nucleus	Soluble	0.0131	0.2786	0.006	0.0009	0.0072	0.0148	0.0019	0.6736	0.0032	0.0006
PF3D7_0213000	conserved protein, unknown function	Mitochondrion	Membrane	0.0037	0.1181	0.1698	0.0099	0.03	0.0025	0.5719	0.0196	0.0741	0.0005
PF3D7_0213400	protein kinase 7	Cytoplasm	Soluble	0.0088	0.4239	0.0811	0.003	0.0281	0.0348	0.0561	0.313	0.0485	0.0026
PF3D7_0213500	tetratricopeptide repeat protein, putative	Cytoplasm	Soluble	0.0041	0.5997	0.0104	0.0003	0.019	0.0098	0.0035	0.3521	0.0009	0.0001
PF3D7_0213900	RTR1 domain-containing protein, putative	Nucleus	Soluble	0.0024	0.305	0.0137	0.0002	0.0347	0.0955	0.001	0.5468	0.0007	0
PF3D7_0214100	protein transport protein SEC31	Cytoplasm	Soluble	0.0068	0.919	0.0012	0.0004	0.0043	0.0115	0.0001	0.0558	0.0009	0.0001
PF3D7_0214300	conserved Plasmodium protein, unknown function	Nucleus	Soluble	0.0011	0.3519	0.0002	0	0.0004	0.0005	0	0.6459	0.0001	0
PF3D7_0215700	DNA-directed RNA polymerase II subunit RPB2, putative	Cytoplasm	Soluble	0.0085	0.895	0.0021	0.0006	0.0031	0.0168	0.0009	0.057	0.0147	0.0013
PF3D7_0216400	vacuolar protein sorting-associated protein 45, putative	Cytoplasm	Soluble	0.0041	0.6497	0.066	0.0022	0.0376	0.0897	0.007	0.1381	0.0051	0.0003
PF3D7_0216700	autophagy-related protein 11, putative	Cytoplasm	Soluble	0.0028	0.4955	0.0177	0	0.2814	0.0183	0.0007	0.1835	0	0.0001
PF3D7_0216900	conserved Plasmodium protein, unknown function	Nucleus	Soluble	0.0017	0.3628	0.0068	0.0003	0.0312	0.0533	0.001	0.5416	0.0011	0.0002
PF3D7_0217400	conserved protein, unknown function	Mitochondrion	Membrane	0.0147	0.004	0.3509	0.0039	0.1556	0.0042	0.4382	0.0066	0.0198	0.002
PF3D7_0217700	E2F-associated phosphoprotein, putative	Nucleus	Soluble	0.002	0.1034	0.0024	0.0028	0.0075	0.0065	0.0464	0.8286	0.0002	0.0003
PF3D7_0217900	conserved Plasmodium protein, unknown function	Mitochondrion	Soluble	0.0083	0.2955	0.0307	0.0059	0.0718	0.0254	0.4485	0.1068	0.0048	0.0025
PF3D7_0218300	rRNA methyltransferase, putative	Endoplasmic reticulum	Soluble	0.0136	0.0187	0.4876	0.2094	0.026	0.2035	0.0289	0.0086	0.0016	0.0022
PF3D7_0219300	conserved Plasmodium protein, unknown function	Mitochondrion	Membrane	0.0148	0.0061	0.3831	0.0015	0.046	0.0015	0.4955	0.0112	0.0399	0.0004
PF3D7_0219400	ribosome associated membrane protein RAMP4, putative, unspecified product	Endoplasmic reticulum	Membrane	0.1019	0.0017	0.5842	0.0002	0.1811	0.0069	0.0835	0.0039	0.0344	0.0022
PF3D7_0219600	replication factor C subunit 1, putative	Nucleus	Soluble	0.0001	0.0091	0.0001	0	0.0001	0	0	0.9906	0	0
PF3D7_0219700	Plasmodium exported protein (PHISTc), unknown function	Golgi apparatus	Membrane	0.0011	0.0028	0.1261	0.0001	0.7869	0.0084	0.042	0.0313	0.0012	0.0001
PF3D7_0219900	Plasmodium exported protein, unknown function	Endoplasmic reticulum	Membrane	0.0051	0.0027	0.7487	0	0.1114	0.0016	0.0687	0.0026	0.0587	0.0006
PF3D7_0220000	liver stage antigen 3	Golgi apparatus	Membrane	0.01	0.0181	0.1514	0.0002	0.6003	0.0379	0.0626	0.0839	0.0049	0.0306
PF3D7_0220100	DnaJ protein, putative	Golgi apparatus	Membrane	0.0203	0.0165	0.2761	0.0002	0.5363	0.0791	0.014	0.0548	0.0025	0.0003
PF3D7_0220600	Plasmodium exported protein (hyp9), unknown function	Endoplasmic reticulum	Membrane	0.1058	0.0002	0.7488	0.0001	0.1103	0.0259	0.0058	0.0003	0.0021	0.0009
PF3D7_0221400	stevor	Endoplasmic reticulum	Membrane	0.3778	0.0001	0.4954	0.0001	0.1016	0.0194	0.0035	0.0005	0.0013	0.0002
PF3D7_0221600	Plasmodium exported protein, unknown function, pseudogene	Nucleus	Membrane	0.0009	0.0292	0.0189	0.0002	0.0077	0.0003	0.0505	0.8888	0.0034	0.0001
PF3D7_0222000	exported protein family 1	Endoplasmic reticulum	Soluble	0.0047	0.1071	0.6042	0.0278	0.0388	0.1605	0.0224	0.0283	0.0025	0.0035
PF3D7_0222100	Pfmc-2TM Maurer's cleft two transmembrane protein	Endoplasmic reticulum	Membrane	0.0314	0.0007	0.8315	0.001	0.1027	0.0026	0.0208	0.0013	0.0077	0.0005
PF3D7_0222500	rifin	Cell membrane	Membrane	0.6286	0	0.3247	0.0001	0.0161	0.0253	0.0018	0.0004	0.0005	0.0024
PF3D7_0222600	rifin	Cell membrane	Membrane	0.8937	0	0.0978	0.0012	0.0055	0.0011	0.0004	0.0002	0.0001	0.0001
PF3D7_0222700	rifin	Cell membrane	Membrane	0.8319	0	0.1507	0.0001	0.0101	0.0018	0.0024	0.0001	0.0004	0.0024
PF3D7_0222800	stevor	Cell membrane	Membrane	0.9689	0	0.0277	0	0.0022	0.0009	0.0002	0	0	0
PF3D7_0222900	erythrocyte membrane protein 1 (PfEMP1), exon 2, pseudogene	Nucleus	Soluble	0.0167	0.2015	0.2084	0.0029	0.0498	0.1411	0.0132	0.3589	0.0075	0.0001
PF3D7_0223100	rifin	Cell membrane	Membrane	0.7992	0.0001	0.1743	0.0001	0.005	0.0044	0.0075	0.0004	0.0073	0.0017
PF3D7_0223200	rifin	Cell membrane	Membrane	0.8774	0	0.0866	0.0002	0.0026	0.0021	0.0199	0.0002	0.0036	0.0074
PF3D7_0223300	erythrocyte membrane protein 1 (PfEMP1), exon 2	Plastid	Membrane	0.0249	0.0484	0.245	0.0255	0.0536	0.0901	0.122	0.0331	0.0101	0.3473
PF3D7_0223400	rifin	Cell membrane	Membrane	0.9353	0	0.041	0.0001	0.0016	0.0013	0.0121	0.0002	0.0047	0.0035
PF3D7_0223500	erythrocyte membrane protein 1, PfEMP1	Nucleus	Soluble	0.0235	0.209	0.0026	0.0001	0.0026	0.0012	0.0004	0.7601	0.0004	0.0002
PF3D7_0300100	erythrocyte membrane protein 1, PfEMP1	Nucleus	Soluble	0.04	0.4117	0.0047	0.0002	0.0064	0.0221	0.0007	0.5121	0.0017	0.0004
PF3D7_0300200	rifin	Cell membrane	Membrane	0.6198	0.0041	0.2456	0.0029	0.0089	0.0122	0.0626	0.0042	0.0316	0.0082
PF3D7_0300400	stevor	Cell membrane	Membrane	0.7009	0	0.2089	0.0004	0.0456	0.0396	0.0034	0.0003	0.0006	0.0002
PF3D7_0300500	rifin	Endoplasmic reticulum	Membrane	0.4287	0	0.5408	0.0001	0.0253	0.0023	0.0018	0.0001	0.0002	0.0007
PF3D7_0300700	rifin	Cell membrane	Membrane	0.8498	0	0.1288	0.0001	0.0114	0.0074	0.0011	0.0001	0.0001	0.0011
PF3D7_0300800	rifin	Cell membrane	Membrane	0.857	0	0.0856	0.0004	0.0048	0.0051	0.0092	0.0001	0.0006	0.0372
PF3D7_0300900	stevor-like	Endoplasmic reticulum	Membrane	0.0092	0.0036	0.8249	0.092	0.0146	0.0267	0.0244	0.0016	0.0026	0.0003
PF3D7_0301100	Plasmodium exported protein (hyp13), unknown function	Endoplasmic reticulum	Membrane	0.0495	0.0004	0.7584	0.0001	0.0687	0.0127	0.0914	0.0013	0.0159	0.0014
PF3D7_0301200	serine/threonine protein kinase, FIKK family	Endoplasmic reticulum	Membrane	0.0113	0.0479	0.4976	0.002	0.2831	0.0483	0.0384	0.0604	0.0105	0.0005
PF3D7_0301300	epoxide hydrolase 1	Golgi apparatus	Membrane	0.077	0.0002	0.1332	0.0023	0.7086	0.0773	0.001	0.0003	0.0001	0
PF3D7_0301400	Plasmodium exported protein, unknown function	Endoplasmic reticulum	Membrane	0.0037	0.0137	0.8573	0.0017	0.045	0.0093	0.0295	0.0242	0.0149	0.0007
PF3D7_0301500	Plasmodium exported protein, unknown function	Endoplasmic reticulum	Membrane	0.006	0.0258	0.4229	0.0001	0.3648	0.1083	0.0164	0.0544	0.0011	0.0002
PF3D7_0301700	Plasmodium exported protein, unknown function	Endoplasmic reticulum	Membrane	0.0401	0.0051	0.6609	0.0002	0.1192	0.0511	0.0246	0.0847	0.0128	0.0011
PF3D7_0301800	Plasmodium exported protein, unknown function	Golgi apparatus	Membrane	0.0019	0.0004	0.3219	0.0002	0.6512	0.0049	0.018	0.001	0.0005	0.0001
PF3D7_0301900	conserved protein, unknown function	Mitochondrion	Membrane	0.0115	0.1315	0.0691	0.001	0.0468	0.0109	0.5425	0.166	0.0205	0.0002
PF3D7_0302000	pre-mRNA-splicing factor PRP46, putative	Nucleus	Soluble	0.0041	0.1722	0.001	0.0016	0.0008	0.0012	0.0015	0.8163	0.001	0.0003
PF3D7_0302200	cytoadherence linked asexual protein 3.2	Endoplasmic reticulum	Soluble	0.0109	0.0213	0.773	0.0249	0.0421	0.0945	0.0132	0.0185	0.0008	0.0006
PF3D7_0302500	cytoadherence linked asexual protein 3.1	Endoplasmic reticulum	Membrane	0.0096	0.0153	0.8228	0.0091	0.0475	0.0645	0.0155	0.0137	0.0014	0.0006
PF3D7_0302800	conserved Plasmodium protein, unknown function	Cytoplasm	Soluble	0.011	0.7183	0.0153	0.0021	0.0391	0.0754	0.0036	0.1264	0.0082	0.0004
PF3D7_0302900	exportin-1, putative	Cytoplasm	Soluble	0.0024	0.6898	0.0208	0.0001	0.0839	0.0677	0.0006	0.1344	0.0002	0.0001
PF3D7_0303200	HAD superfamily protein, putative	Nucleus	Soluble	0.0009	0.0591	0.0018	0.0001	0.0054	0.001	0.0006	0.9308	0.0003	0
PF3D7_0303700	lipoamide acyltransferase component of branched-chain alpha-keto acid dehydrogenase complex	Mitochondrion	Soluble	0.0006	0.0873	0.002	0.0005	0.0041	0.0013	0.8403	0.0597	0.0032	0.0009
PF3D7_0303800	IBR domain protein, putative	Nucleus	Soluble	0.001	0.3286	0.0039	0.0002	0.0014	0.0012	0.001	0.6624	0.0002	0
PF3D7_0304000	inner membrane complex protein 1a, putative	Cytoplasm	Soluble	0.0421	0.512	0.0058	0.001	0.0621	0.0743	0.0045	0.2951	0.0017	0.0015
PF3D7_0304100	inner membrane complex protein 1e, putative	Cytoplasm	Soluble	0.1055	0.5724	0.005	0.0006	0.0267	0.0507	0.0026	0.2342	0.0017	0.0005
PF3D7_0304200	EH domain-containing protein	Cytoplasm	Soluble	0.0095	0.446	0.0813	0.0025	0.1163	0.0536	0.0842	0.1998	0.0052	0.0015
PF3D7_0304600	circumsporozoite (CS) protein	Cell membrane	Membrane	0.5114	0.0033	0.1249	0.1501	0.1608	0.0383	0.0041	0.0067	0.0002	0.0001
PF3D7_0305100	conserved Plasmodium protein, unknown function	Nucleus	Soluble	0.0046	0.4612	0.0035	0.0001	0.0053	0.0215	0.0007	0.5019	0.0012	0
PF3D7_0305200	conserved Plasmodium protein, unknown function	Cytoplasm	Soluble	0.0033	0.4615	0.0219	0.0002	0.2107	0.0965	0.0012	0.2042	0.0003	0.0002
PF3D7_0305500	conserved Plasmodium protein, unknown function	Cytoplasm	Soluble	0.0047	0.6415	0.0089	0.0002	0.0122	0.0592	0.0007	0.2713	0.0013	0
PF3D7_0305600	DNA-(apurinic or apyrimidinic site) lyase, putative	Mitochondrion	Soluble	0.001	0.1183	0.0055	0.0044	0.0059	0.0023	0.5394	0.3034	0.0016	0.0182
PF3D7_0306200	activator of Hsp90 ATPase	Cytoplasm	Soluble	0.0236	0.447	0.0502	0.0065	0.0314	0.1837	0.0161	0.2288	0.0059	0.007
PF3D7_0307300	microtubule-associated protein RP/EB family, putative	Cytoplasm	Soluble	0.0063	0.8105	0.0046	0.0007	0.0144	0.0228	0.0013	0.1369	0.0023	0.0002
PF3D7_0307500	spindle and kinetochore-associated protein 2, putative	Nucleus	Soluble	0.0972	0.2207	0.0019	0.0007	0.0029	0.004	0.0059	0.6638	0.0027	0.0002
PF3D7_0307700	conserved Plasmodium protein, unknown function	Nucleus	Soluble	0.0021	0.2874	0.0006	0.0003	0.0084	0.0488	0.0002	0.6517	0.0005	0
PF3D7_0308000	DNA polymerase delta small subunit, putative	Cytoplasm	Soluble	0.0021	0.4819	0.0016	0.0004	0.0021	0.0369	0.0008	0.4734	0.0007	0.0002
PF3D7_0308100	zinc finger protein, putative	Nucleus	Soluble	0.0033	0.4822	0.0016	0.0001	0.0053	0.0089	0.0005	0.4975	0.0005	0.0001
PF3D7_0308300	conserved Plasmodium protein, unknown function	Nucleus	Soluble	0.007	0.3122	0.0095	0.0056	0.0303	0.1597	0.0266	0.4436	0.0027	0.0029
PF3D7_0308700	conserved protein, unknown function	Cytoplasm	Soluble	0.0104	0.4453	0.0272	0.0037	0.0281	0.0311	0.0905	0.3408	0.018	0.0048
PF3D7_0308900	splicing factor 3B subunit 1, putative	Nucleus	Soluble	0.0098	0.3787	0.0215	0.0003	0.0291	0.0219	0.0059	0.5154	0.0166	0.001
PF3D7_0309000	dual specificity protein phosphatase	Cytoplasm	Soluble	0.0051	0.4832	0.0104	0.0163	0.0147	0.034	0.0092	0.424	0.0027	0.0005
PF3D7_0309100	conserved Plasmodium protein, unknown function	Endoplasmic reticulum	Soluble	0.0006	0.0051	0.6841	0.1495	0.0021	0.156	0.0015	0.001	0	0.0001
PF3D7_0309200	serine/threonine protein kinase, putative	Nucleus	Soluble	0.0031	0.3797	0.002	0.0001	0.0172	0.0062	0.0004	0.5907	0.0005	0.0002
PF3D7_0309600	60S acidic ribosomal protein P2	Cytoplasm	Soluble	0.0107	0.7718	0.0097	0.1096	0.0013	0.0218	0.0347	0.0297	0.0027	0.0081
PF3D7_0309900	conserved Plasmodium protein, unknown function	Cytoplasm	Soluble	0.0071	0.4274	0.0628	0.004	0.0342	0.1562	0.0866	0.2157	0.0048	0.0012
PF3D7_0310200	phd finger protein, putative	Nucleus	Soluble	0.0021	0.1217	0.0013	0.0004	0.0016	0.0247	0.0002	0.8477	0.0003	0
PF3D7_0310300	phosphoglycerate mutase, putative	Nucleus	Soluble	0.0013	0.2926	0.0007	0.0002	0.001	0.0035	0.0009	0.6989	0.0008	0.0001
PF3D7_0310500	ATP-dependent RNA helicase DHX57, putative	Cytoplasm	Soluble	0.0057	0.5929	0.0049	0.0007	0.0097	0.0601	0.0013	0.3224	0.002	0.0001
PF3D7_0310700	trafficking protein particle complex subunit 4, putative	Cytoplasm	Soluble	0.0043	0.5059	0.0325	0.0089	0.0453	0.2267	0.0192	0.1546	0.0023	0.0005
PF3D7_0310800	conserved Plasmodium protein, unknown function	Endoplasmic reticulum	Membrane	0.0699	0.0017	0.6105	0.0055	0.2353	0.0298	0.0377	0.0032	0.0041	0.0023
PF3D7_0311100	pre-mRNA splicing factor, putative	Nucleus	Soluble	0	0.0004	0	0	0	0	0	0.9996	0	0
PF3D7_0311400	kinase-related protein PKRP, putative	Nucleus	Soluble	0.0118	0.3514	0.0004	0.0002	0.0006	0.0009	0.0001	0.6344	0.0002	0
PF3D7_0311600	dolichyl-diphosphooligosaccharide--protein glycosyltransferase subunit 1, putative	Endoplasmic reticulum	Membrane	0.0213	0.0022	0.8672	0.0013	0.0714	0.032	0.002	0.0025	0.0002	0
PF3D7_0311700	plasmepsin VI	Endoplasmic reticulum	Soluble	0.0063	0.0114	0.5769	0.2418	0.0079	0.1499	0.0017	0.0037	0.0001	0.0003
PF3D7_0311800	ATP synthase F0 subunit d-like protein, putative	Mitochondrion	Soluble	0.0013	0.1332	0.0275	0.0004	0.0147	0.0164	0.7597	0.0446	0.0016	0.0007
PF3D7_0311900	heptatricopeptide repeat-containing protein, putative	Mitochondrion	Soluble	0.0025	0.2639	0.0342	0.0028	0.0174	0.007	0.5873	0.07	0.0146	0.0003
PF3D7_0312200	tetratricopeptide repeat protein, putative	Cytoplasm	Soluble	0.0051	0.4976	0.0129	0.0001	0.0233	0.0102	0.0008	0.4494	0.0005	0.0001
PF3D7_0312300	26S proteasome regulatory subunit RPN12, putative	Lysosome/Vacuole	Soluble	0.0058	0.2902	0.072	0.0108	0.0981	0.3059	0.0167	0.1926	0.0013	0.0066
PF3D7_0312400	glycogen synthase kinase 3	Nucleus	Soluble	0.0019	0.3227	0.0107	0.0008	0.0114	0.0253	0.0036	0.6198	0.0034	0.0003
PF3D7_0313000	conserved Plasmodium protein, unknown function	Nucleus	Soluble	0.004	0.0649	0.0081	0.002	0.0166	0.0029	0.0022	0.8993	0.0001	0
PF3D7_0313100	ubiquitin-protein ligase, putative	Endoplasmic reticulum	Membrane	0.0105	0.0408	0.7912	0.0274	0.0271	0.0209	0.0482	0.0248	0.0082	0.001
PF3D7_0313200	conserved protein, unknown function	Mitochondrion	Soluble	0.0005	0.0995	0.0048	0.0025	0.0056	0.0034	0.6569	0.226	0.0005	0.0002
PF3D7_0313300	YGGT family protein, putative	Endoplasmic reticulum	Membrane	0.0022	0.0097	0.877	0.0588	0.0074	0.0025	0.0396	0.0004	0.0022	0.0002
PF3D7_0313400	conserved Plasmodium protein, unknown function	Nucleus	Soluble	0.002	0.3868	0.0037	0.0002	0.007	0.002	0.001	0.5968	0.0004	0
PF3D7_0313600	conserved Plasmodium protein, unknown function	Nucleus	Soluble	0.0002	0.0669	0.0004	0.0001	0.0017	0.0001	0.0004	0.9302	0	0
PF3D7_0313700	conserved Plasmodium protein, unknown function, unspecified product	Endoplasmic reticulum	Membrane	0.0142	0.0049	0.9191	0.0019	0.0245	0.0065	0.0169	0.009	0.0018	0.0012
PF3D7_0313800	conserved Plasmodium protein, unknown function	Endoplasmic reticulum	Membrane	0.0064	0.046	0.3762	0.0042	0.1311	0.0104	0.2704	0.1353	0.0089	0.011
PF3D7_0315100	eukaryotic translation initiation factor 4E	Cytoplasm	Soluble	0.0032	0.6644	0.0314	0.0125	0.0084	0.0163	0.0831	0.1321	0.0467	0.0019
PF3D7_0315200	circumsporozoite- and TRAP-related protein	Cell membrane	Membrane	0.6269	0.0019	0.0975	0.2044	0.0192	0.0379	0.0059	0.0051	0.0006	0.0007
PF3D7_0315400	conserved Plasmodium protein, unknown function	Extracellular	Soluble	0.0005	0.0085	0.1498	0.7497	0.0019	0.044	0.0044	0.041	0	0.0001
PF3D7_0315900	conserved Plasmodium protein, unknown function	Endoplasmic reticulum	Membrane	0.0033	0.007	0.8905	0.0439	0.0266	0.0233	0.0033	0.002	0.0001	0
PF3D7_0316300	inorganic pyrophosphatase, inorganic pyrophosphatase, putative	Endoplasmic reticulum	Soluble	0.0028	0.0051	0.7389	0.1893	0.0019	0.0272	0.0133	0.0014	0.0001	0.02
PF3D7_0316500	kinetochore protein NUF2, putative	Cytoplasm	Soluble	0.003	0.7003	0.014	0.0001	0.0484	0.0143	0.0088	0.2103	0.0006	0.0002
PF3D7_0317200	cdc2-related protein kinase 4	Cytoplasm	Soluble	0.0036	0.5384	0.0013	0.0004	0.0041	0.0091	0.0003	0.4412	0.0016	0.0002
PF3D7_0317300	conserved Plasmodium protein, unknown function	Cytoplasm	Soluble	0.0018	0.5391	0.0078	0.0001	0.0357	0.028	0.0004	0.3871	0.0001	0
PF3D7_0317400	DNA replication complex GINS protein, putative	Nucleus	Soluble	0.0066	0.34	0.0134	0.0008	0.0207	0.017	0.002	0.5986	0.0006	0.0002
PF3D7_0317500	kinesin-5	Cytoplasm	Soluble	0.0038	0.6443	0.0024	0.0003	0.007	0.0174	0.0008	0.3232	0.0008	0.0001
PF3D7_0317700	CPSF (cleavage and polyadenylation specific factor), subunit A, putative	Nucleus	Soluble	0.0031	0.3906	0.0013	0.0002	0.002	0.0237	0.0002	0.5782	0.0006	0
PF3D7_0317800	26S proteasome non-ATPase regulatory subunit 9, putative	Cytoplasm	Soluble	0.0086	0.5153	0.0142	0.0016	0.0185	0.0524	0.0041	0.3774	0.0016	0.0063
PF3D7_0318200	DNA-directed RNA polymerase II subunit RPB1	Cytoplasm	Soluble	0.0042	0.779	0.0005	0.0002	0.0012	0.0062	0.0001	0.2069	0.0013	0.0003
PF3D7_0318500	conserved Plasmodium protein, unknown function	Nucleus	Soluble	0.0128	0.4144	0.0122	0.0001	0.0119	0.0179	0.0007	0.5288	0.0012	0
PF3D7_0318600	cleavage and polyadenylation specificity factor, putative	Nucleus	Soluble	0.0006	0.1678	0.002	0.0002	0.0023	0.001	0.0031	0.8204	0.0025	0.0001
PF3D7_0319000	P-type ATPase, putative	Lysosome/Vacuole	Membrane	0.3381	0.0009	0.2197	0.0001	0.0871	0.3449	0.002	0.0061	0.0011	0.0001
PF3D7_0319100	E3 ubiquitin-protein ligase RBX1, putative	Mitochondrion	Soluble	0.0061	0.0929	0.0003	0.2449	0.001	0.0054	0.5549	0.0904	0.0001	0.0039
PF3D7_0319700	ABC transporter I family member 1, putative	Endoplasmic reticulum	Membrane	0.139	0.0032	0.3901	0.0001	0.157	0.2971	0.0016	0.0112	0.0006	0
PF3D7_0319900	conserved protein, unknown function	Cytoplasm	Soluble	0.0118	0.3888	0.0422	0.0262	0.028	0.1239	0.0066	0.3658	0.0058	0.0008
PF3D7_0320200	CPW-WPC family protein	Extracellular	Soluble	0.0081	0.0044	0.0352	0.9183	0.005	0.0226	0.0029	0.0033	0	0
PF3D7_0320400	oocyst capsule protein Cap380	Endoplasmic reticulum	Soluble	0.0121	0.15	0.4589	0.0944	0.038	0.195	0.0137	0.0326	0.0042	0.0013
PF3D7_0320500	nicotinamidase, putative	Cytoplasm	Soluble	0.0169	0.3779	0.0325	0.0235	0.0364	0.1218	0.0097	0.3588	0.0202	0.0023
PF3D7_0320800	ATP-dependent RNA helicase DDX6	Cytoplasm	Soluble	0.0512	0.5921	0.0173	0.0046	0.0329	0.0588	0.0068	0.1975	0.0254	0.0133
PF3D7_0321500	peptidase, putative	Cytoplasm	Soluble	0.0143	0.5085	0.0156	0.0084	0.016	0.193	0.0202	0.2182	0.0039	0.0019
PF3D7_0321600	ATP-dependent RNA helicase DDX42, putative	Nucleus	Soluble	0.0001	0.0951	0.0007	0	0.0012	0.0003	0.0004	0.9021	0.0001	0
PF3D7_0321800	WD repeat-containing protein, putative	Nucleus	Soluble	0.0017	0.1762	0.0003	0.0001	0.0006	0.0198	0.0001	0.8008	0.0003	0
PF3D7_0322100	mRNA-capping enzyme subunit beta	Cytoplasm	Soluble	0.0029	0.5264	0.0039	0.0005	0.0064	0.0115	0.0036	0.4415	0.0026	0.0006
PF3D7_0322900	40S ribosomal protein S3A, putative	Nucleus	Soluble	0.0003	0.052	0	0	0	0	0.0003	0.9473	0	0
PF3D7_0323300	conserved protein, unknown function	Lysosome/Vacuole	Soluble	0.0208	0.3059	0.0507	0.059	0.0392	0.351	0.026	0.1423	0.0034	0.0017
PF3D7_0323600	conserved Plasmodium protein, unknown function	Nucleus	Soluble	0.0034	0.3693	0.0323	0.0002	0.0258	0.0184	0.0046	0.5439	0.0013	0.0007
PF3D7_0323800	conserved Plasmodium protein, unknown function	Cytoplasm	Soluble	0.0172	0.6946	0.0083	0.0061	0.0128	0.0895	0.001	0.1693	0.0008	0.0003
PF3D7_0324100	Pfmc-2TM Maurer's cleft two transmembrane protein	Endoplasmic reticulum	Membrane	0.0127	0.0003	0.8884	0.0001	0.081	0.0017	0.0125	0.0004	0.0018	0.0011
PF3D7_0324400	rifin	Cell membrane	Membrane	0.9504	0	0.0345	0	0.0131	0.0011	0.0004	0.0001	0	0.0004
PF3D7_0324600	stevor	Cell membrane	Membrane	0.9733	0	0.021	0.0004	0.0022	0.002	0.0007	0.0002	0.0001	0
PF3D7_0324800	rifin	Cell membrane	Membrane	0.8764	0	0.1116	0.0001	0.0053	0.0014	0.0024	0.0003	0.001	0.0014
PF3D7_0324900	erythrocyte membrane protein 1, PfEMP1	Nucleus	Soluble	0.0611	0.2599	0.0117	0.0002	0.0092	0.006	0.0028	0.6438	0.0046	0.0006
PF3D7_0400100	erythrocyte membrane protein 1, PfEMP1	Nucleus	Soluble	0.0286	0.2894	0.006	0.0003	0.0023	0.0338	0.0006	0.6373	0.0014	0.0003
PF3D7_0400200	erythrocyte membrane protein 1 (PfEMP1), exon 2, pseudogene	Cytoplasm	Soluble	0.0075	0.4574	0.0161	0.0125	0.0138	0.0284	0.0556	0.3933	0.0089	0.0066
PF3D7_0400300	rifin	Cell membrane	Membrane	0.5715	0.0019	0.2765	0.0227	0.0195	0.0357	0.0395	0.0034	0.0212	0.0082
PF3D7_0400400	erythrocyte membrane protein 1, PfEMP1	Nucleus	Soluble	0.0174	0.4294	0.0018	0.0003	0.0016	0.0059	0.0002	0.5427	0.0007	0.0001
PF3D7_0400500	rifin	Cell membrane	Membrane	0.2908	0.0022	0.2239	0.0003	0.0198	0.0119	0.2759	0.0055	0.0462	0.1235
PF3D7_0400700	rifin	Cell membrane	Membrane	0.5071	0.0036	0.2893	0.0016	0.0166	0.0305	0.0815	0.0045	0.0313	0.0341
PF3D7_0400800	stevor	Cell membrane	Membrane	0.6274	0.0001	0.2796	0.0004	0.0449	0.0217	0.0209	0.0005	0.0031	0.0016
PF3D7_0400900	rifin	Cell membrane	Membrane	0.8153	0.0001	0.0519	0.0004	0.0016	0.0041	0.0401	0.001	0.0035	0.0819
PF3D7_0401000	rifin	Cell membrane	Membrane	0.8547	0	0.1344	0.0001	0.0066	0.0022	0.0011	0	0.0001	0.0007
PF3D7_0401200	rifin	Cell membrane	Membrane	0.4703	0.0048	0.2408	0.0004	0.024	0.0329	0.1414	0.007	0.0541	0.0242
PF3D7_0401300	rifin	Cell membrane	Membrane	0.7737	0	0.1965	0.0004	0.0107	0.0088	0.0037	0.0005	0.0015	0.0042
PF3D7_0401400	rifin	Cell membrane	Membrane	0.897	0	0.0708	0.0005	0.0032	0.0024	0.0032	0.0002	0.0008	0.022
PF3D7_0401600	rifin	Endoplasmic reticulum	Membrane	0.3077	0	0.6697	0.0001	0.0122	0.0092	0.0007	0	0.0001	0.0002
PF3D7_0401900	acyl-CoA synthetase	Endoplasmic reticulum	Membrane	0.0213	0.0202	0.8588	0.0135	0.0399	0.014	0.0134	0.0177	0.0002	0.0011
PF3D7_0402000	Plasmodium exported protein (PHISTa), unknown function	Golgi apparatus	Membrane	0.0093	0.0053	0.0605	0.0008	0.6841	0.0004	0.1092	0.129	0.0006	0.0007
PF3D7_0402100	Plasmodium exported protein (PHISTb), unknown function	Golgi apparatus	Membrane	0.009	0.0044	0.2444	0.0002	0.5806	0.0863	0.0463	0.0275	0.0008	0.0005
PF3D7_0402200	surface-associated interspersed protein 4.1 (SURFIN 4.1), pseudogene	Cytoplasm	Soluble	0.0297	0.4915	0.0272	0.0001	0.0251	0.025	0.0014	0.3931	0.0054	0.0013
PF3D7_0402400	Plasmodium exported protein, unknown function	Endoplasmic reticulum	Membrane	0.0034	0.0104	0.5623	0.0009	0.32	0.0679	0.0165	0.0142	0.0043	0.0001
PF3D7_0402600	stevor	Cell membrane	Membrane	0.4713	0.0004	0.353	0.0044	0.0293	0.0497	0.0516	0.001	0.0069	0.0324
PF3D7_0403500	ubiquitin specific protease, putative	Cytoplasm	Soluble	0.0019	0.5253	0.0145	0.0303	0.0029	0.0216	0.0275	0.373	0.0021	0.001
PF3D7_0403600	conserved Plasmodium protein, unknown function	Nucleus	Soluble	0.0051	0.2637	0.0084	0.0006	0.0102	0.0236	0.0021	0.6797	0.0066	0.0001
PF3D7_0403900	SET domain protein, putative	Nucleus	Soluble	0.0003	0.1078	0.0003	0.0001	0.0004	0.0002	0.0002	0.8906	0.0001	0
PF3D7_0404100	AP2 domain transcription factor AP2-SP2, putative	Nucleus	Soluble	0.0038	0.3948	0.0007	0.0007	0.0014	0.1025	0.0005	0.4951	0.0005	0
PF3D7_0404200	conserved Plasmodium protein, unknown function	Mitochondrion	Soluble	0.0002	0.0129	0.0008	0.0033	0.0002	0.0001	0.9742	0.0071	0.0012	0
PF3D7_0404600	conserved Plasmodium membrane protein, unknown function	Cytoplasm	Soluble	0.0116	0.6089	0.0249	0.0009	0.0321	0.1847	0.0008	0.1353	0.0008	0
PF3D7_0404700	dipeptidyl aminopeptidase 3	Endoplasmic reticulum	Soluble	0.0171	0.1097	0.2776	0.2634	0.0203	0.2022	0.0204	0.0819	0.0018	0.0055
PF3D7_0404800	conserved Plasmodium protein, unknown function	Endoplasmic reticulum	Soluble	0.0159	0.0041	0.6184	0.07	0.1884	0.0265	0.0399	0.0364	0.0002	0.0001
PF3D7_0405300	liver specific protein 2, putative	Endoplasmic reticulum	Membrane	0.016	0.1298	0.4527	0.0032	0.1876	0.0656	0.0237	0.1151	0.0025	0.0039
PF3D7_0405400	pre-mRNA-processing-splicing factor 8, putative	Cytoplasm	Soluble	0.0021	0.556	0.0008	0.0001	0.0019	0.0052	0.0003	0.4324	0.0011	0
PF3D7_0405600	TMEM33 domain-containing protein, putative	Endoplasmic reticulum	Membrane	0.0073	0.0002	0.9277	0	0.053	0.0012	0.0057	0.0003	0.0047	0
PF3D7_0405700	lysine decarboxylase, putative	Cytoplasm	Soluble	0.0045	0.8169	0.0015	0.0007	0.0027	0.0299	0.0002	0.1427	0.0009	0.0001
PF3D7_0405900	apical sushi protein	Endoplasmic reticulum	Membrane	0.0435	0.0089	0.3627	0.008	0.232	0.0088	0.0075	0.328	0.0004	0.0002
PF3D7_0406200	sexual stage-specific protein precursor	Endoplasmic reticulum	Membrane	0.24	0.0005	0.2659	0.2243	0.2127	0.034	0.0192	0.0017	0.0002	0.0015
PF3D7_0406500	NYN domain-containing protein, putative	Nucleus	Soluble	0.0007	0.303	0.0011	0	0.0119	0.0012	0.0002	0.6818	0	0
PF3D7_0406700	conserved Plasmodium protein, unknown function	Cytoplasm	Soluble	0.0106	0.616	0.0401	0.0001	0.1249	0.0446	0.0019	0.1611	0.0005	0.0002
PF3D7_0406800	ribosomal protein L25, putative	Mitochondrion	Soluble	0.0004	0.1437	0.0063	0.0006	0.001	0.0134	0.8151	0.0161	0.0031	0.0004
PF3D7_0406900	conserved Plasmodium protein, unknown function	Nucleus	Soluble	0.0006	0.1524	0.0001	0.0001	0.0004	0.0001	0.0001	0.8461	0.0001	0
PF3D7_0407000	conserved Plasmodium protein, unknown function	Mitochondrion	Membrane	0.0127	0.0637	0.0231	0.0012	0.0103	0.0895	0.3803	0.3516	0.0676	0.0001
PF3D7_0407200	peptidyl-tRNA hydrolase 2, putative	Endoplasmic reticulum	Membrane	0.0599	0.0236	0.6547	0.0011	0.1218	0.0268	0.0553	0.0383	0.0096	0.0088
PF3D7_0407700	conserved Plasmodium protein, unknown function	Nucleus	Soluble	0.0005	0.1211	0.0017	0	0.004	0.0019	0.0002	0.8704	0.0001	0
PF3D7_0408000	conserved Plasmodium protein, unknown function	Cytoplasm	Soluble	0.0017	0.6434	0.0082	0.0036	0.0009	0.0016	0.1393	0.1878	0.0128	0.0006
PF3D7_0408600	sporozoite invasion-associated protein 1	Endoplasmic reticulum	Soluble	0.0187	0.0415	0.3749	0.3702	0.0043	0.1751	0.0063	0.0062	0.0006	0.0023
PF3D7_0408700	perforin-like protein 1	Golgi apparatus	Soluble	0.0332	0.0258	0.1277	0.2272	0.2983	0.0198	0.0548	0.2127	0.0004	0.0001
PF3D7_0408900	tRNA N6-adenosine threonylcarbamoyltransferase	Endoplasmic reticulum	Membrane	0.0108	0.0395	0.7491	0.0509	0.0243	0.0361	0.0495	0.0351	0.0024	0.0023
PF3D7_0409200	protein SOF1, putative	Nucleus	Soluble	0.001	0.1821	0.0005	0.0001	0.0004	0.0004	0.0004	0.8148	0.0003	0
PF3D7_0409500	NAD(P)-binding protein, putative	Endoplasmic reticulum	Membrane	0.0022	0.0001	0.9276	0	0.0645	0.0006	0.0037	0.0002	0.001	0
PF3D7_0409600	replication protein A1, large subunit	Cytoplasm	Soluble	0.005	0.8439	0.0028	0.0018	0.0057	0.0567	0.0006	0.081	0.002	0.0004
PF3D7_0409900	actin-like protein, putative	Cytoplasm	Soluble	0.0177	0.4981	0.0643	0.0067	0.0203	0.1626	0.025	0.0673	0.1181	0.0199
PF3D7_0410300	protein phosphatase PPM1, putative	Cytoplasm	Soluble	0.0209	0.5186	0.0081	0.0128	0.0065	0.0312	0.0043	0.3459	0.0496	0.002
PF3D7_0410500	conserved Plasmodium protein, unknown function	Nucleus	Soluble	0.0009	0.0865	0.0005	0.0006	0.0009	0.0004	0.0751	0.8346	0.0004	0.0002
PF3D7_0410800	conserved Plasmodium protein, unknown function	Cytoplasm	Soluble	0.0077	0.5993	0.0069	0.0003	0.0181	0.0436	0.0019	0.3199	0.0021	0.0002
PF3D7_0410900	conserved Plasmodium protein, unknown function	Cytoplasm	Soluble	0.0045	0.5406	0.0314	0.0003	0.0953	0.1241	0.002	0.201	0.0005	0.0003
PF3D7_0411000	conserved Plasmodium protein, unknown function	Nucleus	Soluble	0.0032	0.4656	0.002	0.0008	0.0034	0.0449	0.0009	0.4788	0.0002	0
PF3D7_0411700	conserved Plasmodium protein, unknown function	Mitochondrion	Soluble	0.0049	0.0774	0.0901	0.3168	0.0557	0.0215	0.3606	0.0673	0.0054	0.0003
PF3D7_0411900	DNA polymerase alpha catalytic subunit A	Nucleus	Soluble	0.0013	0.3058	0.0007	0	0.0024	0.005	0.0002	0.6844	0.0001	0
PF3D7_0412000	LITAF-like zinc finger protein, putative	Endoplasmic reticulum	Membrane	0.0419	0.013	0.4484	0.0004	0.1679	0.0635	0.0161	0.2436	0.0041	0.0012
PF3D7_0412400	erythrocyte membrane protein 1, PfEMP1	Nucleus	Soluble	0.0415	0.1896	0.0048	0.0009	0.0036	0.0028	0.0015	0.7497	0.0046	0.001
PF3D7_0412700	erythrocyte membrane protein 1, PfEMP1	Nucleus	Soluble	0.0408	0.1217	0.0088	0.0002	0.0026	0.0406	0.001	0.7789	0.0049	0.0004
PF3D7_0412900	erythrocyte membrane protein 1, PfEMP1	Nucleus	Soluble	0.076	0.1946	0.009	0.0003	0.0044	0.0035	0.0009	0.7083	0.0028	0.0002
PF3D7_0413200	rifin	Cell membrane	Membrane	0.8504	0.0001	0.0402	0.0002	0.0021	0.003	0.0397	0.001	0.0033	0.06
PF3D7_0413300	rifin	Cell membrane	Membrane	0.9614	0	0.0326	0	0.0025	0.0012	0.0017	0.0001	0.0003	0.0002
PF3D7_0414000	structural maintenance of chromosomes protein 3, putative	Cytoplasm	Soluble	0.0032	0.5662	0.0154	0	0.0816	0.0156	0.0011	0.3167	0.0001	0.0001
PF3D7_0414700	GTP-binding protein, putative	Mitochondrion	Soluble	0.0018	0.0408	0.0319	0.0389	0.0073	0.0022	0.7776	0.0967	0.0017	0.0009
PF3D7_0414900	armadillo-domain containing rhoptry protein	Cell membrane	Soluble	0.333	0.1813	0.0304	0.0182	0.0798	0.202	0.0168	0.1291	0.007	0.0024
PF3D7_0415000	arsenical pump-driving ATPase, putative	Cytoplasm	Soluble	0.0031	0.4885	0.0082	0.0003	0.0325	0.0696	0.0041	0.3904	0.0019	0.0015
PF3D7_0415100	conserved protein, unknown function	Mitochondrion	Soluble	0.0062	0.2166	0.0823	0.0123	0.0272	0.011	0.5315	0.0995	0.0133	0.0001
PF3D7_0415300	cdc2-related protein kinase 3	Nucleus	Soluble	0.0002	0.0514	0.0001	0	0.0001	0.0001	0	0.9479	0	0
PF3D7_0415400	coatomer subunit zeta, putative	Cytoplasm	Soluble	0.006	0.4774	0.017	0.0049	0.0265	0.216	0.0096	0.2355	0.0014	0.0057
PF3D7_0416300	DNA helicase MCM9, putative	Nucleus	Soluble	0.0018	0.2376	0.0021	0.0002	0.0021	0.0073	0.0004	0.7478	0.0007	0.0001
PF3D7_0416400	histone acetyltransferase, putative	Nucleus	Soluble	0.0001	0.0084	0.0001	0	0.0001	0	0	0.9912	0	0
PF3D7_0416600	prohibitin-like protein PHBL, putative	Mitochondrion	Membrane	0.0025	0.1338	0.0711	0.0022	0.0425	0.0056	0.5331	0.2025	0.0063	0.0004
PF3D7_0416900	conserved Plasmodium protein, unknown function	Nucleus	Soluble	0.0028	0.3307	0.0018	0.0001	0.0033	0.0246	0.0004	0.6357	0.0007	0
PF3D7_0417100	mRNA-binding protein PUF2	Cytoplasm	Soluble	0.0071	0.4294	0.0791	0.0015	0.057	0.2288	0.0099	0.1783	0.0032	0.0056
PF3D7_0417400	conserved Plasmodium protein, unknown function	Nucleus	Soluble	0.0027	0.3278	0.0009	0.0003	0.0011	0.0136	0.0003	0.6528	0.0005	0
PF3D7_0418000	conserved Plasmodium protein, unknown function	Cytoplasm	Soluble	0.0058	0.6996	0.0077	0.0003	0.013	0.0518	0.0004	0.2206	0.0006	0.0001
PF3D7_0418800	MOLO1 domain-containing protein, putative	Cell membrane	Membrane	0.5586	0.0006	0.2981	0.0075	0.029	0.0944	0.0053	0.0009	0.0013	0.0043
PF3D7_0419100	conserved Plasmodium protein, unknown function	Mitochondrion	Soluble	0.004	0.0691	0.1956	0.0481	0.0364	0.0331	0.569	0.0137	0.0124	0.0187
PF3D7_0419200	protein transport protein GOT1, putative	Endoplasmic reticulum	Membrane	0.0005	0	0.729	0	0.2692	0	0.0012	0	0.0001	0
PF3D7_0419300	conserved Plasmodium protein, unknown function	Nucleus	Soluble	0.0024	0.2069	0.0038	0.0045	0.0014	0.0032	0.0089	0.7674	0.001	0.0004
PF3D7_0419400	conserved Plasmodium protein, unknown function	Endoplasmic reticulum	Membrane	0.1814	0.0011	0.4408	0.0004	0.1282	0.2467	0.0002	0.0013	0.0001	0
PF3D7_0419500	conserved Plasmodium membrane protein, unknown function	Endoplasmic reticulum	Membrane	0.0221	0.0051	0.4908	0.0001	0.2401	0.223	0.0046	0.0106	0.0035	0
PF3D7_0419700	apical merozoite protein	Endoplasmic reticulum	Membrane	0.0816	0.0003	0.6095	0.0099	0.2227	0.0707	0.0015	0.0037	0	0.0001
PF3D7_0419900	phosphatidylinositol 4-kinase, putative	Nucleus	Soluble	0.0157	0.3058	0.0418	0.0003	0.0189	0.0143	0.0016	0.5974	0.0043	0
PF3D7_0420000	zinc finger protein, putative	Nucleus	Soluble	0.0026	0.2293	0.0017	0.0001	0.0072	0.0175	0.0003	0.741	0.0003	0
PF3D7_0420300	AP2 domain transcription factor, putative	Cytoplasm	Soluble	0.0039	0.557	0.0018	0.0004	0.0048	0.0426	0.0003	0.388	0.0013	0
PF3D7_0420600	conserved Plasmodium protein, unknown function	Cytoplasm	Soluble	0.0051	0.4882	0.0123	0.0003	0.1156	0.0783	0.0035	0.2942	0.0024	0.0001
PF3D7_0420700	erythrocyte membrane protein 1, PfEMP1	Nucleus	Soluble	0.0068	0.1867	0.0006	0	0.0035	0.0017	0.0002	0.8002	0.0002	0.0001
PF3D7_0420900	erythrocyte membrane protein 1, PfEMP1	Nucleus	Soluble	0.0647	0.1812	0.0039	0.0001	0.0044	0.0014	0.0005	0.7422	0.0013	0.0003
PF3D7_0421200	rifin	Cell membrane	Membrane	0.7416	0	0.2284	0	0.0238	0.0053	0.0007	0	0.0001	0.0001
PF3D7_0421300	erythrocyte membrane protein 1, PfEMP1	Nucleus	Soluble	0.1015	0.0874	0.0065	0.0001	0.0021	0.0031	0.0007	0.7934	0.0048	0.0003
PF3D7_0421800	conserved Plasmodium protein, unknown function	Nucleus	Soluble	0.0043	0.008	0.0005	0.0048	0.0005	0.0002	0.0075	0.9738	0.0001	0.0002
PF3D7_0422000	steroid dehydrogenase, putative	Endoplasmic reticulum	Membrane	0.0024	0.0007	0.9151	0.0002	0.0692	0.0003	0.0081	0.0002	0.0038	0.0001
PF3D7_0422100	transmembrane emp24 domain-containing protein, putative	Endoplasmic reticulum	Membrane	0.0589	0.0005	0.6339	0.0075	0.2637	0.0222	0.0081	0.0035	0.0016	0.0002
PF3D7_0422200	erythrocyte membrane-associated antigen	Cytoplasm	Soluble	0.0075	0.4857	0.0016	0.0004	0.0024	0.0304	0.0005	0.4702	0.0013	0
PF3D7_0422300	alpha tubulin 2	Cytoplasm	Soluble	0.0037	0.7099	0.0041	0.0027	0.0026	0.0255	0.0075	0.2229	0.0121	0.009
PF3D7_0422400	40S ribosomal protein S19	Cytoplasm	Soluble	0.001	0.5529	0.0004	0.0014	0.0001	0.0002	0.1703	0.26	0.013	0.0007
PF3D7_0422500	pre-mRNA-splicing helicase BRR2, putative	Nucleus	Soluble	0.0007	0.3971	0.0009	0	0.002	0.0078	0.0002	0.5913	0.0001	0
PF3D7_0422700	eukaryotic initiation factor 4A-III, putative	Cytoplasm	Soluble	0.0041	0.8232	0.0053	0.0011	0.0061	0.0178	0.0014	0.132	0.0077	0.0012
PF3D7_0423100	AP-4 complex subunit sigma, putative	Cytoplasm	Soluble	0.0033	0.5455	0.014	0.0047	0.0119	0.0337	0.0265	0.3582	0.0009	0.0013
PF3D7_0423400	apical asparagine-rich protein AARP	Extracellular	Soluble	0.0135	0.0285	0.081	0.7131	0.0272	0.0188	0.0573	0.0594	0	0.0012
PF3D7_0423700	early transcribed membrane protein 4	Endoplasmic reticulum	Membrane	0.1614	0.0021	0.507	0.1386	0.0512	0.025	0.1064	0.0022	0.0038	0.0023
PF3D7_0424200	reticulocyte binding protein homologue 4	Endoplasmic reticulum	Membrane	0.126	0.0108	0.6367	0.0029	0.1412	0.0584	0.0104	0.0132	0.0002	0.0002
PF3D7_0424600	Plasmodium exported protein (PHISTb), unknown function	Golgi apparatus	Membrane	0.0045	0.0072	0.1883	0.0085	0.6107	0.0306	0.0775	0.0116	0.0033	0.0577
PF3D7_0424800	Plasmodium exported protein (PHISTb), unknown function	Endoplasmic reticulum	Soluble	0.0048	0.1049	0.4154	0.022	0.1378	0.0256	0.1521	0.0964	0.0392	0.0017
PF3D7_0425100	Plasmodium exported protein (hyp6), unknown function	Endoplasmic reticulum	Membrane	0.0045	0.0063	0.8726	0.0168	0.0074	0.0032	0.0735	0.0059	0.0079	0.002
PF3D7_0425200	Plasmodium exported protein (hyp15), unknown function	Endoplasmic reticulum	Membrane	0.3553	0.0002	0.4446	0.0003	0.0869	0.0574	0.0114	0.0018	0.0024	0.0397
PF3D7_0425300	Plasmodium exported protein (PHISTa), unknown function, pseudogene	Golgi apparatus	Membrane	0.0052	0.0023	0.3147	0.0009	0.6361	0.0267	0.0092	0.0043	0.0005	0.0001
PF3D7_0425500	stevor	Cell membrane	Membrane	0.6039	0.0001	0.0889	0.0002	0.0213	0.0434	0.0643	0.0008	0.0015	0.1755
PF3D7_0425700	rifin	Cell membrane	Membrane	0.4943	0.0024	0.2121	0.0009	0.0223	0.0464	0.125	0.0038	0.0458	0.0471
PF3D7_0425800	erythrocyte membrane protein 1, PfEMP1	Nucleus	Soluble	0.0655	0.3222	0.0143	0.0008	0.0147	0.0121	0.0009	0.5658	0.0034	0.0002
PF3D7_0425900	rifin	Cell membrane	Membrane	0.6251	0.0041	0.1956	0.0036	0.0214	0.0337	0.0714	0.0062	0.023	0.0159
PF3D7_0426000	erythrocyte membrane protein 1, PfEMP1	Nucleus	Soluble	0.0313	0.3942	0.0041	0.0004	0.0044	0.0173	0.0012	0.5431	0.0036	0.0005
PF3D7_0500100	erythrocyte membrane protein 1, PfEMP1	Cytoplasm	Soluble	0.0514	0.5384	0.0052	0.0006	0.0089	0.0173	0.0015	0.3744	0.0018	0.0005
PF3D7_0500400	rifin	Cell membrane	Membrane	0.8314	0.0001	0.0751	0.0001	0.002	0.0009	0.0148	0.0004	0.002	0.0732
PF3D7_0500500	rifin	Cell membrane	Membrane	0.9383	0	0.0497	0.0001	0.0034	0.0028	0.0044	0.0001	0.0007	0.0006
PF3D7_0500800	mature parasite-infected erythrocyte surface antigen	Nucleus	Membrane	0.0051	0.0277	0.0746	0.0002	0.3339	0.0038	0.0128	0.5407	0.0001	0.001
PF3D7_0500900	serine/threonine protein kinase, FIKK family	Endoplasmic reticulum	Membrane	0.0194	0.0274	0.3735	0.0035	0.3623	0.1104	0.0298	0.0614	0.0048	0.0074
PF3D7_0501000	Plasmodium exported protein, unknown function	Endoplasmic reticulum	Membrane	0.0272	0.0026	0.53	0.0003	0.2363	0.1598	0.024	0.0055	0.0135	0.0008
PF3D7_0501100	heat shock protein 40, type II	Golgi apparatus	Membrane	0.0024	0.0023	0.2899	0.0016	0.6724	0.0077	0.019	0.0019	0.0019	0.001
PF3D7_0501200	parasite-infected erythrocyte surface protein	Endoplasmic reticulum	Membrane	0.011	0.0006	0.8422	0.0094	0.1052	0.0012	0.0275	0.0012	0.0007	0.001
PF3D7_0501500	rhoptry-associated protein 3	Endoplasmic reticulum	Soluble	0.0009	0.0042	0.8734	0.0497	0.0142	0.0509	0.0043	0.0023	0.0002	0.0001
PF3D7_0501600	rhoptry-associated protein 2	Endoplasmic reticulum	Soluble	0.001	0.0085	0.5343	0.3561	0.0016	0.0915	0.0052	0.0016	0.0001	0.0001
PF3D7_0501800	chromatin assembly factor 1 subunit A	Nucleus	Soluble	0.0013	0.2258	0.0055	0.0002	0.0069	0.0032	0.0015	0.7545	0.0012	0
PF3D7_0501900	conserved protein, unknown function	Cytoplasm	Soluble	0.0081	0.6198	0.0466	0.0101	0.0182	0.0796	0.0336	0.1401	0.0276	0.0162
PF3D7_0502000	vacuolar protein sorting-associated protein 11, putative	Cytoplasm	Soluble	0.0033	0.6185	0.0422	0.0006	0.0496	0.0609	0.0032	0.22	0.0016	0.0001
PF3D7_0502200	protein Mpv17, putative	Endoplasmic reticulum	Membrane	0.0098	0.0022	0.7001	0.0001	0.0882	0.08	0.0936	0.0017	0.0242	0.0001
PF3D7_0502400	merozoite surface protein 8	Endoplasmic reticulum	Membrane	0.1433	0.0011	0.5255	0.0737	0.1705	0.078	0.001	0.0068	0.0001	0.0001
PF3D7_0502700	conserved protein, unknown function	Nucleus	Soluble	0.0015	0.0779	0.0031	0.0009	0.0033	0.001	0.3598	0.5462	0.0052	0.001
PF3D7_0502800	DnaJ protein, putative	Cytoplasm	Soluble	0.0063	0.494	0.0167	0.0265	0.0097	0.0483	0.0214	0.376	0.0007	0.0003
PF3D7_0503000	50S ribosomal protein L28, apicoplast, putative	Mitochondrion	Membrane	0.0004	0.0283	0.0049	0.0012	0.002	0.0001	0.9068	0.05	0.0061	0.0002
PF3D7_0503600	myosin B	Cytoplasm	Soluble	0.0083	0.5561	0.0365	0.001	0.0408	0.1006	0.018	0.2298	0.0081	0.0008
PF3D7_0503900	conserved Plasmodium protein, unknown function	Cytoplasm	Soluble	0.0085	0.2753	0.2222	0.0108	0.1763	0.0947	0.0949	0.093	0.0238	0.0005
PF3D7_0504200	ATP-dependent RNA helicase DDX27, putative	Endoplasmic reticulum	Membrane	0.0093	0.0343	0.8288	0.036	0.0024	0.0119	0.0559	0.0148	0.0045	0.0021
PF3D7_0504400	ATP-dependent helicase, putative	Golgi apparatus	Membrane	0.0018	0.0041	0.1492	0.001	0.6886	0.0026	0.1196	0.0305	0.0023	0.0002
PF3D7_0504500	MOLO1 domain-containing protein, putative	Endoplasmic reticulum	Membrane	0.1468	0.0009	0.6819	0.0007	0.1137	0.0418	0.005	0.0066	0.0019	0.0008
PF3D7_0504600	2-oxoisovalerate dehydrogenase subunit beta, mitochondrial, putative	Mitochondrion	Soluble	0.0001	0.0055	0.0001	0.0001	0	0.0001	0.9921	0.0002	0.0018	0.0001
PF3D7_0504800	conserved Plasmodium protein, unknown function	Cytoplasm	Soluble	0.0029	0.6194	0.0022	0.0002	0.0047	0.0606	0.0004	0.3093	0.0005	0
PF3D7_0505100	trafficking protein particle complex subunit 8, putative	Cytoplasm	Soluble	0.0031	0.5611	0.0035	0.0002	0.0058	0.0184	0.0006	0.4066	0.0008	0
PF3D7_0505200	actin-like protein, putative	Cytoplasm	Soluble	0.0034	0.563	0.02	0.0433	0.0119	0.0927	0.0051	0.2545	0.005	0.0011
PF3D7_0505400	conserved protein, unknown function	Endoplasmic reticulum	Soluble	0.0077	0.0526	0.5693	0.055	0.0193	0.0028	0.1536	0.1374	0.001	0.0014
PF3D7_0505500	DNA mismatch repair protein MSH6, putative	Nucleus	Soluble	0.0079	0.3574	0.0087	0.0004	0.0161	0.0126	0.0014	0.5928	0.0021	0.0007
PF3D7_0506200	TATA-box-binding protein	Cytoplasm	Soluble	0.0044	0.5179	0.0139	0.0027	0.0103	0.0187	0.0105	0.4095	0.0118	0.0004
PF3D7_0506300	conserved protein, unknown function	Mitochondrion	Soluble	0.0004	0.0261	0.0013	0.0008	0.0017	0.0004	0.8305	0.1332	0.0033	0.0024
PF3D7_0506800	transcription factor 25, putative	Nucleus	Soluble	0.0036	0.2902	0.0071	0.0002	0.0137	0.0034	0.0006	0.6811	0.0002	0
PF3D7_0506900	rhomboid protease ROM4	Cell membrane	Membrane	0.3981	0.0015	0.2854	0.0005	0.1411	0.141	0.0131	0.0117	0.0067	0.001
PF3D7_0507200	subtilisin-like protease 3	Nucleus	Soluble	0.0376	0.1879	0.1365	0.1038	0.029	0.0259	0.0508	0.3981	0.0266	0.0038
PF3D7_0507300	subtilisin-like ookinete protein SOPT	Nucleus	Membrane	0.0243	0.0133	0.1716	0.0057	0.0812	0.0066	0.0464	0.6479	0.0026	0.0004
PF3D7_0507700	nuclear protein localization protein 4, putative	Cytoplasm	Soluble	0.004	0.4871	0.0043	0.0006	0.0091	0.0074	0.0193	0.4666	0.0011	0.0006
PF3D7_0507900	conserved Plasmodium protein, unknown function	Endoplasmic reticulum	Membrane	0.0209	0.1308	0.5548	0.0022	0.1204	0.0726	0.0073	0.0855	0.0052	0.0002
PF3D7_0508000	6-cysteine protein	Endoplasmic reticulum	Membrane	0.3818	0.0006	0.4061	0.0037	0.1167	0.0878	0.0006	0.0027	0	0
PF3D7_0508400	conserved protein, unknown function	Nucleus	Soluble	0.0006	0.049	0.0098	0.0021	0.0127	0.0006	0.0771	0.8472	0.0007	0.0003
PF3D7_0508500	guanidine nucleotide exchange factor	Cytoplasm	Soluble	0.009	0.5553	0.0047	0.0017	0.003	0.1154	0.0004	0.307	0.0033	0.0001
PF3D7_0508600	conserved protein, unknown function	Nucleus	Soluble	0	0.0016	0	0	0	0	0	0.9984	0	0
PF3D7_0508900	conserved Plasmodium protein, unknown function	Nucleus	Soluble	0.004	0.3443	0.0015	0.0001	0.0103	0.0178	0.0002	0.6217	0.0002	0
PF3D7_0509000	alpha-soluble NSF attachment protein, putative	Cytoplasm	Soluble	0.0111	0.7926	0.0178	0.0003	0.0145	0.0403	0.004	0.1166	0.0023	0.0005
PF3D7_0509100	structural maintenance of chromosomes protein 4, putative	Nucleus	Soluble	0.0001	0.1194	0.0003	0	0.0025	0.0002	0.0001	0.8774	0	0
PF3D7_0509200	leucine-rich repeat protein	Cytoplasm	Soluble	0.0035	0.5652	0.0396	0.0007	0.0105	0.0236	0.005	0.3131	0.0384	0.0003
PF3D7_0509500	ERCC4 domain-containing protein, putative	Nucleus	Soluble	0.0033	0.4364	0.0129	0.0007	0.0088	0.0084	0.0041	0.5225	0.0026	0.0003
PF3D7_0509600	asparagine--tRNA ligase	Endoplasmic reticulum	Soluble	0.0225	0.0211	0.6353	0.1723	0.0354	0.0375	0.0541	0.0127	0.0018	0.0072
PF3D7_0509700	conserved Plasmodium protein, unknown function	Nucleus	Soluble	0.002	0.3867	0.0282	0.0004	0.0523	0.0579	0.0028	0.4682	0.001	0.0004
PF3D7_0509800	phosphatidylinositol 4-kinase	Nucleus	Soluble	0.002	0.3826	0.001	0.0001	0.0074	0.0063	0.0003	0.5997	0.0005	0
PF3D7_0509900	conserved protein, unknown function	Nucleus	Soluble	0.0026	0.2845	0.0061	0.0002	0.0043	0.0042	0.0015	0.6957	0.0008	0.0001
PF3D7_0510100	conserved protein, unknown function	Cytoplasm	Soluble	0.0071	0.7034	0.0039	0.0014	0.0111	0.1235	0.0011	0.1477	0.0007	0.0001
PF3D7_0510400	PDCD2 domain-containing protein, putative	Nucleus	Soluble	0.003	0.4045	0.0067	0.0012	0.0151	0.0252	0.0045	0.5387	0.0009	0.0002
PF3D7_0510800	WD repeat-containing protein, putative	Cytoplasm	Soluble	0.0153	0.5654	0.0132	0.0074	0.0209	0.0477	0.0051	0.3193	0.0044	0.0014
PF3D7_0511100	conserved Plasmodium protein, unknown function	Extracellular	Soluble	0.0028	0.0034	0.123	0.8327	0.0023	0.0121	0.0172	0.0033	0.0002	0.003
PF3D7_0511300	MORN repeat protein, putative	Cytoplasm	Soluble	0.0046	0.5768	0.0241	0.003	0.015	0.1234	0.0023	0.2468	0.0038	0.0002
PF3D7_0511400	conserved Plasmodium protein, unknown function	Endoplasmic reticulum	Membrane	0.0212	0.0004	0.9141	0.0012	0.04	0.0075	0.0094	0.0048	0.0003	0.001
PF3D7_0511500	RNA pseudouridylate synthase, putative	Cytoplasm	Soluble	0.003	0.6026	0.0027	0.0002	0.0059	0.024	0.0002	0.361	0.0004	0
PF3D7_0511600	apical rhoptry neck protein	Endoplasmic reticulum	Membrane	0.1597	0.0001	0.7307	0.0033	0.0893	0.0115	0.0028	0.0016	0.0008	0.0002
PF3D7_0512100	conserved protein, unknown function	Mitochondrion	Soluble	0.0002	0.0666	0.0004	0.0013	0.0003	0.0002	0.8856	0.0435	0.0019	0.0001
PF3D7_0512600	ras-related protein Rab-1B	Golgi apparatus	Membrane	0.1481	0.0885	0.0348	0.0201	0.6026	0.0786	0.0038	0.0218	0.0016	0.0002
PF3D7_0512900	AKAP-like protein	Mitochondrion	Soluble	0.0019	0.0546	0.074	0.0061	0.0125	0.0105	0.8137	0.0227	0.0026	0.0013
PF3D7_0513000	conserved protein, unknown function	Extracellular	Soluble	0.0009	0.0128	0.1102	0.7234	0.0008	0.1486	0.0021	0.0009	0.0001	0.0004
PF3D7_0513100	conserved protein, unknown function	Cytoplasm	Soluble	0.0094	0.4652	0.0861	0.002	0.0355	0.0358	0.0566	0.2579	0.0428	0.0087
PF3D7_0513200	conserved Plasmodium protein, unknown function	Nucleus	Soluble	0.0012	0.3357	0.0009	0	0.0017	0.0043	0.0002	0.6556	0.0003	0
PF3D7_0513300	purine nucleoside phosphorylase	Cytoplasm	Soluble	0.0067	0.7011	0.0097	0.0148	0.005	0.0231	0.0392	0.0563	0.0771	0.0669
PF3D7_0513400	GTP-binding protein, putative	Mitochondrion	Soluble	0.0016	0.0772	0.0085	0.001	0.0102	0.002	0.816	0.0609	0.0214	0.001
PF3D7_0513700	secreted ookinete protein, putative	Lysosome/Vacuole	Soluble	0.0022	0.158	0.2642	0.1563	0.019	0.3657	0.0147	0.0167	0.002	0.0013
PF3D7_0514000	tubulin--tyrosine ligase, putative	Mitochondrion	Soluble	0.0023	0.3209	0.1054	0.0027	0.0129	0.0077	0.408	0.1182	0.0208	0.0013
PF3D7_0514100	ATP-dependent DNA helicase UvrD	Nucleus	Soluble	0.0033	0.4147	0.0047	0.0002	0.0174	0.012	0.0028	0.5422	0.0025	0.0003
PF3D7_0514600	ribose-5-phosphate isomerase, putative	Cytoplasm	Soluble	0.0045	0.7049	0.0189	0.0075	0.0014	0.021	0.0147	0.0204	0.1532	0.0535
PF3D7_0514900	conserved Plasmodium protein, unknown function	Cytoplasm	Soluble	0.0019	0.4951	0.0176	0.0006	0.0175	0.0135	0.0097	0.4405	0.0035	0
PF3D7_0516000	RAP protein, putative	Mitochondrion	Soluble	0.0014	0.1171	0.0085	0.0002	0.0095	0.0012	0.6315	0.2279	0.0021	0.0005
PF3D7_0516400	phosducin-like protein, putative	Nucleus	Soluble	0.0015	0.3461	0.0036	0.0011	0.0028	0.0051	0.009	0.6244	0.0062	0.0004
PF3D7_0516500	major facilitator superfamily domain-containing protein, putative	Golgi apparatus	Membrane	0.1465	0	0.1848	0	0.3535	0.3137	0.0011	0.0001	0.0001	0
PF3D7_0516600	sporozoite surface antigen MB2	Endoplasmic reticulum	Soluble	0.0219	0.0346	0.5354	0.0455	0.1541	0.0571	0.072	0.074	0.0028	0.0026
PF3D7_0516800	AP2 domain transcription factor AP2-O2, putative	Cytoplasm	Soluble	0.0036	0.4668	0.0026	0.0005	0.006	0.0644	0.0005	0.4551	0.0005	0
PF3D7_0517600	F-actin-capping protein subunit beta, putative	Cytoplasm	Soluble	0.0061	0.5366	0.1197	0.0127	0.0146	0.0446	0.057	0.1749	0.0316	0.0021
PF3D7_0517700	eukaryotic translation initiation factor 3 subunit B, putative	Nucleus	Soluble	0.0042	0.3365	0.0191	0.0006	0.03	0.0242	0.008	0.5685	0.0071	0.0018
PF3D7_0517900	zinc finger protein, putative	Nucleus	Soluble	0.0039	0.3875	0.0031	0.0005	0.0057	0.013	0.0024	0.581	0.0017	0.0011
PF3D7_0518400	cyclin, putative	Cytoplasm	Soluble	0.0109	0.5404	0.1905	0.0019	0.0235	0.0363	0.0135	0.1341	0.0485	0.0005
PF3D7_0518600	WD repeat-containing protein 26, putative	Nucleus	Soluble	0.0004	0.0694	0	0.0001	0.0001	0	0	0.93	0	0
PF3D7_0518700	mRNA-binding protein PUF1	Cytoplasm	Soluble	0.0233	0.4984	0.0249	0.091	0.0118	0.0748	0.0013	0.2741	0.0004	0
PF3D7_0518800	secreted ookinete protein, putative	Extracellular	Soluble	0.0014	0.0168	0.4072	0.4788	0.0093	0.036	0.0127	0.0372	0	0.0006
PF3D7_0518900	conserved protein, unknown function	Cytoplasm	Soluble	0.0114	0.4285	0.0279	0.0157	0.0093	0.0279	0.0753	0.3923	0.0091	0.0027
PF3D7_0519000	histone RNA hairpin-binding protein, putative	Nucleus	Soluble	0.0013	0.2384	0.0013	0.0006	0.001	0.0002	0.0698	0.6859	0.0015	0.0001
PF3D7_0519100	50S ribosomal protein L14, mitochondrial, putative	Mitochondrion	Soluble	0.0011	0.0124	0.0002	0.0229	0.0003	0.0001	0.9611	0.0016	0.0002	0.0002
PF3D7_0519200	V-type proton ATPase 16 kDa proteolipid subunit	Lysosome/Vacuole	Soluble	0.0843	0	0.0052	0.0011	0.0124	0.8965	0.0005	0	0	0
PF3D7_0519300	protoheme IX farnesyltransferase, putative	Endoplasmic reticulum	Membrane	0.1967	0.0011	0.6106	0.0001	0.0931	0.0177	0.059	0.0015	0.0197	0.0004
PF3D7_0519900	conserved protein, unknown function	Endoplasmic reticulum	Membrane	0.012	0.0058	0.7071	0.0007	0.2376	0.007	0.0227	0.0038	0.002	0.0012
PF3D7_0520000	40S ribosomal protein S9, putative	Cytoplasm	Soluble	0.0005	0.6411	0.0001	0.0001	0	0	0.0036	0.353	0.0016	0
PF3D7_0520100	protein phosphatase PPM9, putative	Nucleus	Soluble	0.0048	0.2257	0.038	0.0004	0.0211	0.0148	0.0033	0.6874	0.0043	0.0002
PF3D7_0520400	single-stranded DNA-binding protein, putative	Mitochondrion	Soluble	0.0007	0.0389	0.006	0.001	0.0021	0.0022	0.9223	0.0197	0.0069	0.0001
PF3D7_0521200	conserved protein, unknown function	Cytoplasm	Soluble	0.0066	0.4179	0.0541	0.0059	0.0232	0.0216	0.144	0.2598	0.0655	0.0014
PF3D7_0521300	zinc finger protein, putative	Nucleus	Soluble	0.0004	0.1693	0.0001	0	0.0004	0.0001	0.0002	0.8294	0.0001	0
PF3D7_0521400	conserved protein, unknown function	Mitochondrion	Soluble	0.0044	0.0118	0.4253	0.075	0.0173	0.0086	0.4451	0.009	0.0017	0.0018
PF3D7_0521600	conserved Plasmodium protein, unknown function	Nucleus	Soluble	0.0044	0.3525	0.0096	0.0064	0.0038	0.0035	0.1917	0.4239	0.004	0.0002
PF3D7_0521700	ATP-dependent RNA helicase DDX1, putative	Cytoplasm	Soluble	0.0123	0.5186	0.0326	0.0089	0.0139	0.1294	0.0047	0.2724	0.0058	0.0014
PF3D7_0521800	AFG1-like ATPase, putative	Mitochondrion	Soluble	0.0035	0.1151	0.0794	0.0042	0.0095	0.0201	0.669	0.0435	0.0089	0.0468
PF3D7_0522400	conserved Plasmodium protein, unknown function	Nucleus	Soluble	0.0038	0.4263	0.0009	0.0001	0.0014	0.0058	0.0003	0.5608	0.0004	0
PF3D7_0522500	50S ribosomal protein L17, apicoplast, putative	Extracellular	Soluble	0.0002	0.0185	0.0144	0.6155	0	0.0001	0.3481	0.0016	0	0.0016
PF3D7_0523100	mitochondrial-processing peptidase subunit alpha, putative	Mitochondrion	Soluble	0.0029	0.1893	0.0064	0.0062	0.0005	0.0034	0.7616	0.0117	0.0158	0.0023
PF3D7_0523400	DnaJ protein, putative	Endoplasmic reticulum	Membrane	0.2027	0.0207	0.3564	0.0055	0.0644	0.1805	0.1047	0.0084	0.0412	0.0154
PF3D7_0523800	divalent metal transporter, putative	Lysosome/Vacuole	Membrane	0.1888	0.0025	0.2008	0.0001	0.0952	0.5047	0.0027	0.0038	0.0014	0.0001
PF3D7_0524100	conserved Plasmodium protein, unknown function	Nucleus	Soluble	0.0001	0.0209	0.0002	0	0.0002	0	0	0.9785	0	0
PF3D7_0524200	conserved Plasmodium membrane protein, unknown function	Endoplasmic reticulum	Membrane	0.0282	0.0001	0.5712	0	0.3913	0.0053	0.0033	0.0002	0.0005	0
PF3D7_0524300	conserved Plasmodium protein, unknown function	Cytoplasm	Soluble	0.0019	0.6387	0.0088	0.0001	0.0201	0.0225	0.0003	0.3075	0.0001	0
PF3D7_0524400	ribosome-interacting GTPase 1, putative	Cytoplasm	Soluble	0.0339	0.657	0.0133	0.0036	0.0052	0.0254	0.0236	0.1331	0.0646	0.0401
PF3D7_0524500	conserved Plasmodium protein, unknown function	Cytoplasm	Soluble	0.0029	0.3277	0.0284	0.02	0.0289	0.2766	0.0308	0.279	0.0005	0.0052
PF3D7_0524700	mitochondrial import receptor subunit TOM22, putative	Mitochondrion	Membrane	0.0805	0.0014	0.0661	0.0011	0.2209	0.007	0.5898	0.0026	0.0087	0.0218
PF3D7_0524800	ubiquitin fusion degradation protein 1, putative	Nucleus	Soluble	0.0038	0.482	0.0035	0.0012	0.0072	0.0141	0.0046	0.4826	0.0007	0.0003
PF3D7_0525000	zinc finger protein, putative	Nucleus	Soluble	0.0053	0.3452	0.0025	0.003	0.0042	0.0219	0.0011	0.616	0.0005	0.0001
PF3D7_0525100	acyl-CoA synthetase	Cytoplasm	Soluble	0.0085	0.6248	0.01	0.0009	0.0033	0.0091	0.0056	0.2746	0.061	0.0022
PF3D7_0525200	structural maintenance of chromosomes protein 6, putative	Nucleus	Soluble	0.0023	0.4571	0.002	0.0001	0.0071	0.0148	0.0005	0.5156	0.0004	0.0001
PF3D7_0525300	conserved protein, unknown function	Cytoplasm	Soluble	0.0061	0.4421	0.0769	0.002	0.049	0.0861	0.0105	0.3176	0.0092	0.0006
PF3D7_0525800	inner membrane complex protein 1g, putative	Cytoplasm	Soluble	0.1107	0.4945	0.0055	0.0172	0.0206	0.0902	0.0235	0.2158	0.0048	0.0171
PF3D7_0526200	ADP-ribosylation factor GTPase-activating protein, putative	Golgi apparatus	Soluble	0.0284	0.3031	0.0851	0.006	0.3313	0.1343	0.0275	0.0762	0.0063	0.0018
PF3D7_0526600	conserved Plasmodium protein, unknown function	Cytoplasm	Soluble	0.0055	0.5224	0.0003	0	0.0023	0.0044	0	0.465	0.0001	0
PF3D7_0526900	transmembrane emp24 domain-containing protein, putative	Endoplasmic reticulum	Membrane	0.0624	0.0001	0.8125	0	0.107	0.0122	0.0042	0.0002	0.0013	0
PF3D7_0527200	ubiquitin carboxyl-terminal hydrolase 14	Nucleus	Soluble	0.0039	0.4701	0.0057	0.0003	0.0198	0.0156	0.0031	0.4802	0.0011	0.0002
PF3D7_0527600	conserved Plasmodium protein, unknown function	Nucleus	Soluble	0.0004	0.0205	0.0077	0.0001	0.002	0.0004	0.0025	0.9659	0.0006	0
PF3D7_0528200	eukaryotic translation initiation factor 3 subunit E, putative	Cytoplasm	Soluble	0.0057	0.5593	0.1324	0.0008	0.0498	0.0455	0.0024	0.2002	0.0037	0.0002
PF3D7_0528300	conserved protein, unknown function	Cytoplasm	Soluble	0.0034	0.5448	0.0319	0.0008	0.038	0.0378	0.0039	0.3373	0.0017	0.0004
PF3D7_0528400	palmitoyltransferase DHHC7	Endoplasmic reticulum	Membrane	0.1067	0.0024	0.5435	0.0001	0.1327	0.1865	0.003	0.0222	0.0028	0.0001
PF3D7_0528500	F-actin-capping protein subunit alpha, putative	Cytoplasm	Soluble	0.007	0.4259	0.0547	0.011	0.0568	0.0401	0.2661	0.1211	0.0153	0.0022
PF3D7_0529000	conserved Plasmodium protein, unknown function	Lysosome/Vacuole	Membrane	0.2554	0.0004	0.259	0.0006	0.1494	0.33	0.0035	0.0012	0.0004	0
PF3D7_0529400	conserved Plasmodium protein, unknown function	Cytoplasm	Soluble	0.016	0.6517	0.0083	0.0014	0.0295	0.052	0.0008	0.2393	0.0009	0.0002
PF3D7_0529700	heptatricopeptide repeat-containing protein, putative	Nucleus	Soluble	0.0048	0.413	0.0118	0.0054	0.0095	0.0284	0.0758	0.4461	0.0031	0.0023
PF3D7_0530100	SNARE protein, putative	Endoplasmic reticulum	Membrane	0.0298	0.0049	0.5723	0	0.2737	0.093	0.0015	0.0244	0.0001	0.0002
PF3D7_0530900	formin 1	Cytoplasm	Soluble	0.0075	0.8406	0.0016	0.0001	0.0097	0.0196	0.0001	0.1196	0.001	0.0001
PF3D7_0531100	conserved Plasmodium protein, unknown function	Nucleus	Soluble	0.0013	0.3769	0.0018	0	0.0044	0.0077	0.0004	0.6071	0.0003	0
PF3D7_0531400	conserved Plasmodium protein, unknown function	Nucleus	Soluble	0.0019	0.3763	0.0132	0.0003	0.0077	0.0218	0.0009	0.5775	0.0006	0
PF3D7_0532100	early transcribed membrane protein 5	Endoplasmic reticulum	Membrane	0.2028	0.0002	0.376	0.0237	0.0669	0.0134	0.3018	0.0016	0.0014	0.0123
PF3D7_0532300	Plasmodium exported protein (PHISTb), unknown function	Nucleus	Soluble	0.0048	0.1374	0.1899	0.0031	0.2147	0.0318	0.0181	0.3992	0.0005	0.0006
PF3D7_0532400	lysine-rich membrane-associated PHISTb protein	Nucleus	Membrane	0.0268	0.0262	0.2782	0.0046	0.1892	0.0096	0.1502	0.3025	0.0108	0.0019
PF3D7_0533100	erythrocyte membrane protein 1 (PfEMP1), pseudogene	Cytoplasm	Soluble	0.0135	0.571	0.0005	0.0006	0.0004	0.0016	0.0001	0.4118	0.0004	0
PF3D7_0600200	erythrocyte membrane protein 1, PfEMP1	Nucleus	Soluble	0.0119	0.4725	0.0019	0.0003	0.0015	0.0026	0.0003	0.508	0.0008	0.0001
PF3D7_0600300	rifin	Endoplasmic reticulum	Membrane	0.4611	0.0004	0.463	0.0001	0.0222	0.0208	0.0137	0.0024	0.0092	0.0071
PF3D7_0600400	erythrocyte membrane protein 1, PfEMP1	Cytoplasm	Soluble	0.1035	0.4413	0.0209	0.0038	0.0161	0.0593	0.0221	0.2603	0.0674	0.0053
PF3D7_0600500	rifin	Cell membrane	Membrane	0.8604	0	0.1228	0.0001	0.0033	0.0022	0.0056	0.0002	0.0012	0.0041
PF3D7_0600700	rifin	Cell membrane	Membrane	0.8619	0.0002	0.0674	0.0002	0.0038	0.0202	0.0196	0.0003	0.0171	0.0092
PF3D7_0601000	exported protein family 4	Endoplasmic reticulum	Membrane	0.2314	0.0001	0.641	0.0001	0.1071	0.0085	0.0057	0.0026	0.0014	0.0021
PF3D7_0601200	Pfmc-2TM Maurer's cleft two transmembrane protein	Endoplasmic reticulum	Membrane	0.0157	0.0006	0.8544	0.0009	0.0878	0.0014	0.0284	0.0012	0.0078	0.0019
PF3D7_0601500	Plasmodium exported protein (PHISTb), unknown function	Endoplasmic reticulum	Membrane	0.0227	0.009	0.6967	0.0016	0.1619	0.0659	0.0026	0.0392	0.0001	0.0004
PF3D7_0601700	Plasmodium exported protein (PHISTa), unknown function, pseudogene	Golgi apparatus	Membrane	0.008	0.0017	0.3565	0.0062	0.5735	0.0286	0.0213	0.0021	0.0017	0.0005
PF3D7_0602000	zinc finger protein, putative	Cytoplasm	Soluble	0.0062	0.5256	0.0033	0.0051	0.0076	0.1045	0.0015	0.3458	0.0005	0.0001
PF3D7_0602100	ATP-dependent RNA helicase, putative	Nucleus	Soluble	0.0005	0.2633	0.0028	0	0.0112	0.0035	0.0007	0.7177	0.0003	0.0001
PF3D7_0602200	MYND-type zinc finger protein, putative	Nucleus	Soluble	0.045	0.2944	0.0119	0.0933	0.0355	0.0535	0.067	0.3904	0.0018	0.0071
PF3D7_0602600	SAC3 domain-containing protein, putative	Cytoplasm	Soluble	0.0019	0.6707	0.0022	0.0002	0.0108	0.0165	0.0004	0.2965	0.0006	0
PF3D7_0602700	conserved Plasmodium protein, unknown function	Nucleus	Soluble	0.0454	0.325	0.0635	0.0153	0.0255	0.0777	0.0227	0.4029	0.0193	0.0027
PF3D7_0603100	RNA-binding protein, putative	Cytoplasm	Soluble	0.0047	0.7035	0.0129	0.0056	0.0166	0.1063	0.0116	0.1347	0.0027	0.0015
PF3D7_0603300	dihydroorotate dehydrogenase	Mitochondrion	Soluble	0.0026	0.1344	0.0623	0.0034	0.0061	0.0053	0.662	0.0311	0.0901	0.0028
PF3D7_0603800	centrosomal protein CEP76, putative	Nucleus	Soluble	0.019	0.282	0.1156	0.0017	0.0383	0.0233	0.0566	0.3773	0.0837	0.0026
PF3D7_0604000	conserved Plasmodium protein, unknown function	Nucleus	Soluble	0.0022	0.4232	0.0026	0.0001	0.0045	0.0058	0.0048	0.5555	0.0013	0.0001
PF3D7_0604100	AP2 domain transcription factor	Nucleus	Soluble	0.0042	0.412	0.0012	0.0002	0.0044	0.0447	0.0005	0.5319	0.0009	0
PF3D7_0604500	conserved Plasmodium protein, unknown function	Cytoplasm	Soluble	0.0075	0.5264	0.0044	0.0004	0.0135	0.0269	0.0006	0.42	0.0002	0.0001
PF3D7_0605000	50S ribosomal protein L24, putative	Mitochondrion	Soluble	0.0001	0.0127	0.0002	0.0002	0	0.0001	0.9415	0.0009	0.0008	0.0435
PF3D7_0605500	cyclin dependent kinase binding protein, putative	Nucleus	Soluble	0.0008	0.0493	0.0015	0.0005	0.001	0.0006	0.0046	0.94	0.0014	0.0004
PF3D7_0605600	nucleoside diphosphate kinase, putative	Nucleus	Soluble	0.0018	0.4559	0.0047	0.0001	0.0054	0.0054	0.0002	0.5262	0.0001	0.0002
PF3D7_0606000	conserved Plasmodium protein, unknown function	Cytoplasm	Soluble	0.0073	0.6314	0.0086	0.0005	0.0502	0.0729	0.0031	0.2224	0.0032	0.0005
PF3D7_0606100	RNA-binding protein, putative	Nucleus	Soluble	0	0.0033	0	0	0	0	0	0.9967	0	0
PF3D7_0606500	polypyrimidine tract-binding protein, putative	Nucleus	Soluble	0.002	0.348	0.0019	0.0004	0.003	0.0041	0.0012	0.6358	0.0035	0.0001
PF3D7_0606600	conserved Plasmodium protein, unknown function	Cytoplasm	Soluble	0.0033	0.6533	0.0043	0.0002	0.0271	0.0579	0.001	0.252	0.0008	0.0001
PF3D7_0606700	coatomer alpha subunit, putative	Cytoplasm	Soluble	0.004	0.8111	0.0051	0.0013	0.0116	0.0305	0.0039	0.1302	0.0021	0.0002
PF3D7_0606800	VFT protein	Extracellular	Soluble	0.0005	0.012	0.3428	0.4155	0.0013	0.2215	0.0034	0.0021	0.0001	0.0007
PF3D7_0607300	uroporphyrinogen III decarboxylase	Endoplasmic reticulum	Membrane	0.0198	0.0064	0.7523	0.0129	0.0388	0.156	0.0093	0.0025	0.0008	0.0012
PF3D7_0607600	spindle assembly abnormal protein 6, putative	Cytoplasm	Soluble	0.0065	0.7464	0.0104	0.0011	0.0346	0.064	0.0024	0.1325	0.0016	0.0005
PF3D7_0607700	conserved Plasmodium protein, unknown function	Cytoplasm	Soluble	0.0066	0.7488	0.0024	0.0009	0.0056	0.075	0.0007	0.1582	0.0015	0.0002
PF3D7_0608100	conserved Plasmodium protein, unknown function	Nucleus	Soluble	0.0148	0.0478	0.3696	0.0132	0.0748	0.0122	0.0455	0.4208	0.0005	0.0008
PF3D7_0608310	sorting assembly machinery 50 kDa subunit, putative	Cytoplasm	Soluble	0.0136	0.3649	0.1819	0.0279	0.0124	0.1381	0.0633	0.0229	0.1667	0.0084
PF3D7_0608400	conserved Plasmodium protein, unknown function	Mitochondrion	Membrane	0.0017	0.0018	0.0102	0.0003	0.0149	0.0002	0.9637	0.0013	0.0059	0
PF3D7_0608500	proteasome subunit alpha type-2, putative	Cytoplasm	Soluble	0.0028	0.698	0.0121	0.003	0.0026	0.088	0.0057	0.0502	0.0178	0.1198
PF3D7_0609000	nucleoporin NUP637, putative	Cytoplasm	Soluble	0.0043	0.7958	0.0086	0.0002	0.0149	0.0372	0.0003	0.1379	0.0007	0.0001
PF3D7_0609300	conserved Plasmodium protein, unknown function	Nucleus	Soluble	0.0059	0.3971	0.0135	0.0005	0.1117	0.0308	0.0062	0.4331	0.0009	0.0003
PF3D7_0609900	conserved Plasmodium protein, unknown function	Cytoplasm	Soluble	0.0033	0.4639	0.0269	0.0005	0.0193	0.0441	0.0014	0.4384	0.0021	0.0001
PF3D7_0610000	mitochondrial ribosomal protein L19 precursor, putative	Mitochondrion	Soluble	0.0004	0.0467	0.0001	0.0005	0.0002	0	0.9024	0.0489	0.0009	0
PF3D7_0610200	RNA-binding protein 25, putative	Nucleus	Soluble	0.0005	0.1541	0.0018	0	0.006	0.0008	0.0002	0.8366	0	0
PF3D7_0611800	conserved Plasmodium protein, unknown function	Cytoplasm	Soluble	0.0052	0.6181	0.0057	0.0004	0.0141	0.1055	0.0008	0.2496	0.0004	0.0001
PF3D7_0611900	lsm12, putative	Cytoplasm	Soluble	0.0047	0.6982	0.0128	0.013	0.0057	0.0243	0.0318	0.1963	0.0103	0.0029
PF3D7_0612700	6-cysteine protein	Cell membrane	Membrane	0.6555	0.0001	0.0923	0.0012	0.1294	0.1197	0.0008	0.001	0	0
PF3D7_0613300	rhoptry protein ROP14	Endoplasmic reticulum	Membrane	0.1121	0.0007	0.4335	0	0.1911	0.2589	0.001	0.0023	0.0002	0
PF3D7_0613900	myosin E, putative	Nucleus	Soluble	0.0001	0.1441	0.0016	0	0.0069	0.0031	0.0001	0.8438	0	0.0001
PF3D7_0614000	thiamine-phosphate synthase, putative	Cytoplasm	Soluble	0.0261	0.386	0.1481	0.0109	0.1706	0.0716	0.0586	0.1029	0.0221	0.003
PF3D7_0614400	pre-mRNA-splicing factor CWF7, putative	Nucleus	Soluble	0.0006	0.1953	0.002	0	0.0048	0.0024	0.0014	0.7931	0.0002	0.0001
PF3D7_0614800	endonuclease III-like protein 1, putative	Mitochondrion	Soluble	0.0021	0.0411	0.0129	0.0166	0.0029	0.0004	0.6622	0.2612	0.0004	0.0001
PF3D7_0615100	enoyl-acyl carrier reductase	Extracellular	Soluble	0.0093	0.0134	0.3441	0.4013	0.0365	0.0813	0.1032	0.008	0.0019	0.0009
PF3D7_0615600	zinc finger protein, putative	Nucleus	Soluble	0.0018	0.3591	0.0174	0.0001	0.0193	0.031	0.0005	0.5704	0.0004	0
PF3D7_0615800	conserved oligomeric Golgi complex subunit 4, putative	Cytoplasm	Soluble	0.0027	0.5544	0.0191	0.0008	0.0281	0.068	0.0017	0.3246	0.0005	0.0001
PF3D7_0616000	pyridoxal kinase	Nucleus	Soluble	0.004	0.3943	0.0035	0.0053	0.0025	0.0226	0.012	0.5478	0.004	0.0039
PF3D7_0616300	conserved Plasmodium protein, unknown function	Nucleus	Soluble	0.0013	0.14	0.004	0.0003	0.0031	0.0046	0.0052	0.8388	0.0009	0.0019
PF3D7_0616800	malate:quinone oxidoreductase	Mitochondrion	Membrane	0.0103	0.049	0.0066	0.0018	0.0039	0.0023	0.8548	0.0104	0.0511	0.0097
PF3D7_0617000	mitochondrial import receptor subunit TOM40, putative	Cytoplasm	Soluble	0.0187	0.4366	0.0475	0.0304	0.0173	0.0442	0.0879	0.1729	0.106	0.0385
PF3D7_0617400	erythrocyte membrane protein 1, PfEMP1	Nucleus	Soluble	0.0359	0.2663	0.0071	0.0002	0.0029	0.0137	0.0007	0.6692	0.0036	0.0004
PF3D7_0617600	stevor	Cell membrane	Membrane	0.9124	0	0.069	0.0004	0.0114	0.0057	0.0008	0	0.0001	0.0001
PF3D7_0617700	rifin	Cell membrane	Membrane	0.8528	0	0.1337	0.0003	0.0063	0.0038	0.0016	0.0002	0.0005	0.0008
PF3D7_0618500	malate dehydrogenase	Cytoplasm	Soluble	0.0011	0.9189	0.0013	0.0019	0.0004	0.0104	0.0038	0.0061	0.0526	0.0036
PF3D7_0618700	trafficking protein particle complex subunit 6A, putative	Nucleus	Soluble	0.0037	0.2881	0.1462	0.0107	0.0523	0.045	0.0138	0.4329	0.0062	0.0011
PF3D7_0618900	phosphatidylinositol N-acetylglucosaminyltransferase subunit GPI1	Endoplasmic reticulum	Membrane	0.0299	0.0022	0.5215	0.0001	0.2426	0.1856	0.0064	0.0077	0.0041	0.0001
PF3D7_0619000	conserved protein, unknown function	Nucleus	Soluble	0.0014	0.3618	0.0131	0.0001	0.0382	0.0097	0.0003	0.5753	0.0002	0
PF3D7_0619400	cell division cycle protein 48 homologue, putative	Nucleus	Soluble	0.0044	0.3186	0.0021	0.0003	0.0014	0.0038	0.0009	0.6596	0.0065	0.0023
PF3D7_0619700	conserved protein, unknown function	Nucleus	Soluble	0.012	0.2405	0.0147	0.0021	0.0165	0.0072	0.0086	0.6964	0.0019	0.0001
PF3D7_0619900	splicing factor 3A subunit 2, putative	Nucleus	Soluble	0.0058	0.2286	0.0015	0.0055	0.0019	0.0022	0.0538	0.6939	0.0045	0.002
PF3D7_0620000	secreted ookinete protein 25, putative	Endoplasmic reticulum	Membrane	0.0086	0.0001	0.8446	0.0018	0.1381	0.0053	0.0004	0.0011	0	0
PF3D7_0620100	ATP synthase-associated protein, putative	Mitochondrion	Soluble	0.0003	0.0279	0.0006	0.0007	0.0011	0.0005	0.9231	0.0437	0.0012	0.0009
PF3D7_0620200	conserved Plasmodium protein, unknown function	Endoplasmic reticulum	Soluble	0.0078	0.2075	0.257	0.0113	0.1113	0.1743	0.0112	0.2177	0.0017	0.0001
PF3D7_0620400	merozoite surface protein 10	Endoplasmic reticulum	Membrane	0.1169	0.0069	0.3721	0.0616	0.3209	0.0723	0.0113	0.0362	0.0018	0.0001
PF3D7_0620600	conserved Plasmodium protein, unknown function	Cytoplasm	Soluble	0.0016	0.5194	0.0238	0.0019	0.0101	0.0189	0.0054	0.417	0.0016	0.0004
PF3D7_0621200	pyridoxine biosynthesis protein PDX1	Cytoplasm	Soluble	0.0015	0.784	0.0007	0.0005	0.0001	0.0018	0.0031	0.0219	0.1824	0.0039
PF3D7_0621400	Pf77 protein	Cytoplasm	Soluble	0.009	0.5392	0.0071	0.0023	0.0075	0.0571	0.0021	0.3705	0.0031	0.0022
PF3D7_0621900	signal recognition particle subunit SRP68, putative	Nucleus	Soluble	0.0023	0.422	0.0073	0.0007	0.0074	0.0129	0.0033	0.5394	0.0044	0.0002
PF3D7_0622000	conserved Plasmodium protein, unknown function	Endoplasmic reticulum	Membrane	0.0538	0.0004	0.803	0.0011	0.1311	0.0048	0.0027	0.0017	0.0015	0
PF3D7_0622100	conserved Plasmodium protein, unknown function	Cytoplasm	Soluble	0.0038	0.6026	0.0037	0.001	0.0097	0.0375	0.0009	0.3399	0.0008	0.0001
PF3D7_0622800	leucine--tRNA ligase, putative	Cytoplasm	Soluble	0.0024	0.6374	0.0072	0.0008	0.0161	0.0326	0.0059	0.2963	0.0011	0.0001
PF3D7_0623300	EGF-like membrane protein, putative	Cell membrane	Membrane	0.8701	0	0.0603	0.0002	0.0686	0.0007	0	0	0	0
PF3D7_0623400	MEI2-like RNA-binding protein, putative	Cytoplasm	Soluble	0.0101	0.5171	0.0184	0.0093	0.0164	0.036	0.0232	0.3247	0.0419	0.0027
PF3D7_0623700	ATP-dependent RNA helicase SUV3, putative	Cytoplasm	Soluble	0.0073	0.6162	0.0114	0.0086	0.0073	0.0873	0.0107	0.246	0.0044	0.0007
PF3D7_0623800	tyrosine kinase-like protein, putative	Nucleus	Soluble	0.005	0.3744	0.0024	0.0005	0.0076	0.0188	0.001	0.5887	0.0014	0.0001
PF3D7_0623900	ribonuclease H2 subunit A, putative	Cytoplasm	Soluble	0.0055	0.7387	0.0351	0.0287	0.0017	0.0714	0.007	0.0358	0.0568	0.0193
PF3D7_0624500	anaphase-promoting complex subunit 11, putative	Extracellular	Soluble	0	0.0169	0	0.9323	0	0	0.0444	0.0063	0	0
PF3D7_0624600	SNF2 helicase, putative	Nucleus	Soluble	0.0002	0.0439	0	0	0.0002	0	0	0.9557	0	0
PF3D7_0624900	GAS8-like protein, putative	Nucleus	Soluble	0.0009	0.3489	0.0016	0	0.0092	0.0022	0.0004	0.6367	0.0001	0
PF3D7_0625000	sphingomyelin synthase 1, putative	Endoplasmic reticulum	Membrane	0.1478	0.0001	0.6259	0	0.1536	0.0695	0.0015	0.0006	0.001	0.0001
PF3D7_0625400	conserved Plasmodium protein, unknown function	Endoplasmic reticulum	Soluble	0.0017	0.0301	0.5924	0.2225	0.0154	0.1137	0.0104	0.0134	0.0001	0.0002
PF3D7_0625500	conserved Plasmodium membrane protein, unknown function	Endoplasmic reticulum	Membrane	0.0051	0.0012	0.867	0	0.0707	0.0396	0.0096	0.0008	0.006	0
PF3D7_0625600	poly(A) polymerase PAP, putative	Cytoplasm	Soluble	0.0087	0.3177	0.2059	0.0039	0.0904	0.0978	0.0545	0.1874	0.0317	0.002
PF3D7_0626100	oxidoreductase, short-chain dehydrogenase family, putative	Endoplasmic reticulum	Membrane	0.0029	0.0032	0.6411	0	0.3058	0.004	0.0323	0.001	0.0096	0
PF3D7_0626600	conserved Plasmodium protein, unknown function	Mitochondrion	Soluble	0.0013	0.2572	0.0575	0.0136	0.0096	0.0069	0.6201	0.0195	0.0128	0.0014
PF3D7_0626800	pyruvate kinase	Cytoplasm	Soluble	0.0042	0.3839	0.003	0.0012	0.0039	0.004	0.2307	0.0392	0.0504	0.2795
PF3D7_0626900	mitochondrial ribosomal protein L46 precursor, putative	Nucleus	Soluble	0.0005	0.1672	0.0014	0.0005	0.0037	0.0008	0.1218	0.7033	0.0007	0.0001
PF3D7_0627000	conserved Plasmodium protein, unknown function	Nucleus	Soluble	0.0039	0.4534	0.0083	0.001	0.009	0.0147	0.0324	0.4749	0.0011	0.0013
PF3D7_0627100	ankyrin-repeat protein, putative	Nucleus	Soluble	0.0019	0.3973	0.0006	0.0001	0.0019	0.0057	0.0002	0.5919	0.0003	0
PF3D7_0627400	mitochondrial import inner membrane translocase subunit TIM22, putative	Mitochondrion	Membrane	0.017	0.0047	0.1674	0.0002	0.0083	0.0044	0.6535	0.0013	0.1385	0.0046
PF3D7_0628000	6-pyruvoyltetrahydropterin synthase	Cytoplasm	Soluble	0.0036	0.4773	0.0125	0.0008	0.0108	0.0151	0.0579	0.415	0.0046	0.0024
PF3D7_0628100	HECT-domain (ubiquitin-transferase), putative	Cytoplasm	Soluble	0.0045	0.6313	0.0034	0.0002	0.0062	0.0251	0.0003	0.3284	0.0006	0
PF3D7_0628200	eukaryotic translation initiation factor 2-alpha kinase	Nucleus	Soluble	0.0393	0.2922	0.0524	0.0003	0.0551	0.0776	0.0021	0.4756	0.0051	0.0002
PF3D7_0628600	DNA methyltransferase 1-associated protein 1, putative	Nucleus	Soluble	0.0081	0.3801	0.0272	0.0007	0.0181	0.0105	0.0039	0.5475	0.0013	0.0026
PF3D7_0629000	glucosamine 6-phosphate N-acetyltransferase	Endoplasmic reticulum	Soluble	0.0051	0.3599	0.3614	0.0008	0.0203	0.0115	0.0327	0.0723	0.1359	0.0002
PF3D7_0629300	phospholipase, putative	Endoplasmic reticulum	Soluble	0.0146	0.0337	0.4019	0.3555	0.0266	0.0943	0.0305	0.0307	0.0003	0.012
PF3D7_0629500	amino acid transporter AAT1	Endoplasmic reticulum	Membrane	0.1022	0.0001	0.5311	0	0.211	0.1488	0.0025	0.0034	0.001	0
PF3D7_0629600	RNA-binding protein, putative	Nucleus	Soluble	0.0051	0.1618	0.0057	0.0052	0.0036	0.0026	0.0546	0.74	0.0209	0.0004
PF3D7_0629700	SET domain protein, putative	Nucleus	Soluble	0.0021	0.1228	0.0005	0.0001	0.0011	0.0087	0.0001	0.8644	0.0002	0
PF3D7_0629900	sec14-like cytosolic factor or phosphatidylinositol/phosphatidylcholine transfer protein, putative	Cytoplasm	Soluble	0.0073	0.6319	0.007	0.0054	0.0078	0.0398	0.0132	0.2721	0.0116	0.0039
PF3D7_0630300	DNA polymerase epsilon catalytic subunit A, putative	Cytoplasm	Soluble	0.0025	0.7471	0.0021	0.0001	0.0028	0.0134	0.0004	0.2309	0.0007	0
PF3D7_0630600	conserved protein, unknown function	Cytoplasm	Soluble	0.0075	0.549	0.0594	0.0015	0.0427	0.0879	0.0016	0.248	0.0024	0.0001
PF3D7_0631000	tetratricopeptide repeat protein, putative	Cytoplasm	Soluble	0.033	0.3024	0.059	0.0119	0.094	0.1043	0.1264	0.2565	0.006	0.0067
PF3D7_0631100	Plasmodium exported protein (PHISTb), unknown function	Endoplasmic reticulum	Membrane	0.0235	0.0086	0.702	0.0016	0.1578	0.0687	0.0018	0.0354	0.0001	0.0003
PF3D7_0631400	Pfmc-2TM Maurer's cleft two transmembrane protein	Endoplasmic reticulum	Membrane	0.019	0.0004	0.8702	0.0002	0.0759	0.0011	0.0251	0.0006	0.0052	0.0022
PF3D7_0631800	rifin	Cell membrane	Membrane	0.919	0	0.0628	0.0001	0.0011	0.001	0.0034	0	0.0002	0.0123
PF3D7_0631900	stevor	Cell membrane	Membrane	0.7765	0	0.1815	0.0003	0.0246	0.0129	0.0033	0.0002	0.0007	0.0001
PF3D7_0632000	rifin	Cell membrane	Membrane	0.9354	0	0.0563	0.0001	0.0037	0.0014	0.0012	0.0003	0.0007	0.001
PF3D7_0632100	rifin	Cell membrane	Membrane	0.9274	0	0.0342	0.0003	0.0014	0.001	0.0045	0.0001	0.0002	0.0311
PF3D7_0632200	rifin	Cell membrane	Membrane	0.5003	0.0025	0.2058	0.0003	0.0247	0.0209	0.1625	0.0042	0.0343	0.0444
PF3D7_0632300	rifin	Endoplasmic reticulum	Membrane	0.4349	0	0.5154	0	0.0455	0.0033	0.0006	0.0001	0	0.0001
PF3D7_0632400	rifin	Cell membrane	Membrane	0.8563	0.0001	0.1239	0.0002	0.0027	0.0013	0.0064	0.0003	0.0042	0.0047
PF3D7_0632500	erythrocyte membrane protein 1, PfEMP1	Nucleus	Soluble	0.0095	0.4691	0.0009	0.0003	0.0015	0.0038	0.0002	0.5138	0.0007	0.0001
PF3D7_0632700	rifin	Cell membrane	Membrane	0.7963	0.0004	0.1598	0.0004	0.0092	0.009	0.0148	0.0029	0.0058	0.0014
PF3D7_0632800	erythrocyte membrane protein 1, PfEMP1	Nucleus	Soluble	0.0327	0.2459	0.0057	0.0001	0.0045	0.0052	0.0007	0.7038	0.0011	0.0003
PF3D7_0700100	erythrocyte membrane protein 1, PfEMP1	Nucleus	Soluble	0.0319	0.2196	0.0027	0.0005	0.0031	0.0026	0.0005	0.7369	0.0018	0.0003
PF3D7_0700200	rifin	Cell membrane	Membrane	0.8474	0	0.11	0.0006	0.0028	0.0027	0.0039	0.0002	0.0009	0.0316
PF3D7_0700300	rifin	Cell membrane	Membrane	0.9476	0	0.0441	0	0.0052	0.0012	0.001	0.0003	0.0004	0.0001
PF3D7_0700400	stevor	Cell membrane	Membrane	0.8338	0	0.1366	0.0001	0.0215	0.0073	0.0005	0.0001	0.0001	0.0001
PF3D7_0700500	rifin	Cell membrane	Membrane	0.9477	0	0.0249	0.0001	0.0015	0.0007	0.0006	0	0.0001	0.0244
PF3D7_0701000	erythrocyte membrane protein 1 (PfEMP1), pseudogene	Cytoplasm	Soluble	0.0241	0.2164	0.1687	0.0073	0.0962	0.1175	0.1727	0.1773	0.0166	0.0034
PF3D7_0701100	rifin	Cell membrane	Membrane	0.6156	0.002	0.2344	0.0006	0.0107	0.0177	0.0722	0.0043	0.0305	0.0121
PF3D7_0701600	Pfmc-2TM Maurer's cleft two transmembrane protein	Endoplasmic reticulum	Membrane	0.0134	0.0001	0.8852	0.0001	0.0863	0.0009	0.0096	0.0004	0.0013	0.0027
PF3D7_0701800	rifin	Cell membrane	Membrane	0.9197	0	0.0566	0.0001	0.0121	0.0043	0.004	0.0003	0.0008	0.0021
PF3D7_0701900	Plasmodium exported protein, unknown function	Golgi apparatus	Membrane	0.1364	0.0012	0.3439	0.0001	0.3941	0.0264	0.0448	0.0441	0.0049	0.0043
PF3D7_0702200	lysophospholipase, putative	Lysosome/Vacuole	Soluble	0.0259	0.2226	0.201	0.0124	0.0837	0.325	0.036	0.0555	0.0249	0.013
PF3D7_0702300	sporozoite threonine and asparagine-rich protein	Endoplasmic reticulum	Membrane	0.0275	0.0035	0.4436	0.0064	0.3594	0.086	0.0337	0.0341	0.0028	0.0028
PF3D7_0702400	small exported membrane protein 1	Endoplasmic reticulum	Membrane	0.0427	0.0345	0.663	0.0237	0.0228	0.0085	0.0699	0.0751	0.0592	0.0006
PF3D7_0702500	Plasmodium exported protein, unknown function	Endoplasmic reticulum	Membrane	0.2661	0.0051	0.3835	0.0002	0.1987	0.0562	0.0193	0.0549	0.0059	0.0102
PF3D7_0702600	chitinase precursor fragment, truncated	Extracellular	Soluble	0.0307	0.0019	0.0289	0.8549	0.0149	0.0588	0.0076	0.0003	0	0.002
PF3D7_0703100	MIP18 family protein, putative	Cytoplasm	Soluble	0.0025	0.5689	0.1041	0.0023	0.0302	0.0819	0.0406	0.1522	0.016	0.0012
PF3D7_0703200	conserved Plasmodium protein, unknown function	Nucleus	Soluble	0.0049	0.4305	0.0087	0.0009	0.015	0.0157	0.0014	0.5215	0.0012	0.0001
PF3D7_0703300	conserved Plasmodium protein, unknown function	Mitochondrion	Soluble	0.0105	0.0394	0.0249	0.0113	0.0396	0.1381	0.6251	0.0258	0.0015	0.0837
PF3D7_0703500	erythrocyte membrane-associated antigen	Cytoplasm	Soluble	0.0128	0.6689	0.0145	0.0029	0.047	0.05	0.075	0.0922	0.0248	0.0119
PF3D7_0703700	conserved protein, unknown function	Nucleus	Soluble	0.016	0.2804	0.005	0.1293	0.0214	0.0308	0.0802	0.4341	0.0004	0.0023
PF3D7_0704000	conserved Plasmodium membrane protein, unknown function	Lysosome/Vacuole	Soluble	0.0215	0.2725	0.1706	0.0012	0.0782	0.308	0.0014	0.1434	0.0029	0.0001
PF3D7_0704200	tRNA m5C-methyltransferase, putative	Cytoplasm	Soluble	0.0037	0.6748	0.0097	0.0012	0.015	0.0558	0.0018	0.2356	0.002	0.0002
PF3D7_0704300	conserved Plasmodium membrane protein, unknown function	Endoplasmic reticulum	Membrane	0.0323	0.0046	0.4656	0	0.4265	0.0404	0.0053	0.0249	0.0003	0.0003
PF3D7_0704500	serine/threonine protein kinase, putative	Nucleus	Soluble	0.0015	0.1201	0.0005	0.0008	0.0005	0.0002	0.0048	0.8712	0.0003	0
PF3D7_0704600	E3 ubiquitin-protein ligase	Nucleus	Soluble	0.0036	0.3295	0.0072	0.0001	0.0149	0.0179	0.0002	0.6264	0.0002	0
PF3D7_0704800	protein phosphatase PPM12, putative	Nucleus	Soluble	0.0053	0.4647	0.0021	0.0003	0.0054	0.0363	0.0016	0.4838	0.0005	0.0001
PF3D7_0704900	peptide chain release factor 2	Endoplasmic reticulum	Membrane	0.0337	0.021	0.5599	0.0895	0.1341	0.0535	0.0751	0.029	0.0028	0.0013
PF3D7_0705000	mRNA cap guanine-N7 methyltransferase, putative	Nucleus	Soluble	0.0006	0.1928	0.0037	0.0001	0.0065	0.0054	0.0004	0.7904	0.0002	0
PF3D7_0705500	inositol-phosphate phosphatase, putative	Cytoplasm	Soluble	0.0076	0.6714	0.004	0.0005	0.0148	0.0532	0.0006	0.2462	0.0017	0.0001
PF3D7_0705600	RNA helicase, putative	Nucleus	Soluble	0.0008	0.069	0.0003	0.0002	0.0005	0.0001	0.0336	0.8948	0.0006	0.0001
PF3D7_0706500	conserved Plasmodium protein, unknown function	Nucleus	Soluble	0.001	0.1917	0.0018	0.0019	0.0042	0.0329	0.0002	0.7663	0.0001	0
PF3D7_0706700	DNA mismatch repair protein MSH2, putative	Cytoplasm	Soluble	0.0318	0.54	0.0154	0.0022	0.0392	0.0524	0.0062	0.2916	0.0201	0.0011
PF3D7_0707200	conserved Plasmodium protein, unknown function	Cytoplasm	Soluble	0.0077	0.4581	0.0627	0.0005	0.0451	0.1266	0.0011	0.2972	0.0011	0
PF3D7_0707300	rhoptry-associated membrane antigen	Endoplasmic reticulum	Membrane	0.0044	0.0028	0.6067	0.0407	0.2134	0.0049	0.0139	0.1122	0	0.0009
PF3D7_0707400	AAA family ATPase, putative	Nucleus	Soluble	0.0255	0.3591	0.0516	0.001	0.0957	0.0184	0.0277	0.4059	0.0128	0.0024
PF3D7_0707500	conserved Plasmodium protein, unknown function	Cytoplasm	Soluble	0.0028	0.6437	0.0057	0.0008	0.0036	0.0197	0.0021	0.3176	0.0039	0.0001
PF3D7_0707700	E3 ubiquitin-protein ligase, putative	Cytoplasm	Soluble	0.0047	0.7109	0.0037	0.0012	0.01	0.033	0.0005	0.2354	0.0006	0.0002
PF3D7_0708000	cytoskeleton associated protein, putative	Cytoplasm	Soluble	0.0066	0.4404	0.0525	0.0037	0.0174	0.1402	0.0054	0.3292	0.0022	0.0024
PF3D7_0708400	heat shock protein 90	Nucleus	Soluble	0.0013	0.4716	0.0057	0.0001	0.0149	0.006	0.0012	0.4976	0.0009	0.0007
PF3D7_0709000	chloroquine resistance transporter	Lysosome/Vacuole	Membrane	0.1533	0.0002	0.2014	0	0.1232	0.5187	0.0016	0.0009	0.0007	0
PF3D7_0709100	Cg1 protein	Cytoplasm	Soluble	0.09	0.3021	0.229	0.0616	0.0429	0.1933	0.0042	0.0725	0.0023	0.0022
PF3D7_0709300	Cg2 protein	Cytoplasm	Soluble	0.0046	0.6373	0.0077	0.0004	0.0102	0.0812	0.0006	0.2568	0.0011	0
PF3D7_0709400	Cg7 protein	Cytoplasm	Soluble	0.0046	0.618	0.0077	0.0002	0.0157	0.0452	0.0011	0.3066	0.0006	0.0003
PF3D7_0709700	prodrug activation and resistance esterase	Cytoplasm	Soluble	0.0219	0.3696	0.0882	0.0063	0.0238	0.0089	0.0956	0.2845	0.0972	0.004
PF3D7_0709900	conserved protein, unknown function	Nucleus	Membrane	0.262	0.0661	0.1963	0.001	0.0692	0.0799	0.0049	0.3139	0.0066	0.0002
PF3D7_0710200	conserved Plasmodium protein, unknown function	Cytoplasm	Soluble	0.0031	0.4942	0.0043	0	0.0707	0.0128	0.0003	0.4146	0	0
PF3D7_0710300	conserved protein, unknown function	Endoplasmic reticulum	Membrane	0.012	0	0.6296	0	0.3577	0.0006	0.0001	0	0	0
PF3D7_0710400	DNA repair protein RAD14, putative	Nucleus	Soluble	0.0012	0.1876	0.002	0.0007	0.0035	0.0045	0.0085	0.7906	0.0012	0.0002
PF3D7_0710500	conserved protein, unknown function	Endoplasmic reticulum	Membrane	0.0081	0.0169	0.8497	0.0118	0.0207	0.0392	0.0394	0.006	0.0012	0.0069
PF3D7_0711000	AAA family ATPase, CDC48 subfamily	Golgi apparatus	Membrane	0.0156	0.0182	0.124	0.0134	0.6003	0.0258	0.1166	0.0788	0.0055	0.0018
PF3D7_0711100	conserved protein, unknown function	Endoplasmic reticulum	Membrane	0.0585	0.0016	0.7045	0.0018	0.1162	0.0367	0.0432	0.0128	0.0239	0.001
PF3D7_0711200	conserved Plasmodium protein, unknown function	Cytoplasm	Soluble	0.0028	0.5997	0.0226	0.0019	0.0316	0.0279	0.1586	0.1509	0.0035	0.0004
PF3D7_0711300	conserved Plasmodium protein, unknown function	Mitochondrion	Soluble	0.0026	0.3189	0.0066	0.0219	0.0019	0.0074	0.3363	0.2974	0.0062	0.0008
PF3D7_0711700	erythrocyte membrane protein 1, PfEMP1	Nucleus	Soluble	0.0567	0.3014	0.0092	0.0013	0.0097	0.0262	0.0019	0.59	0.003	0.0006
PF3D7_0712000	erythrocyte membrane protein 1, PfEMP1	Nucleus	Soluble	0.0132	0.144	0.0012	0.0001	0.002	0.0006	0.0002	0.8376	0.0009	0.0002
PF3D7_0712300	erythrocyte membrane protein 1, PfEMP1	Nucleus	Soluble	0.0792	0.2548	0.0127	0.0003	0.0044	0.0079	0.001	0.6348	0.0044	0.0004
PF3D7_0712400	erythrocyte membrane protein 1, PfEMP1	Nucleus	Soluble	0.1283	0.4038	0.0154	0.0007	0.0052	0.0166	0.0045	0.4182	0.0062	0.0011
PF3D7_0712600	erythrocyte membrane protein 1, PfEMP1	Nucleus	Soluble	0.0079	0.1463	0.0018	0.0001	0.0026	0.0004	0.0006	0.8396	0.0004	0.0002
PF3D7_0712800	erythrocyte membrane protein 1, PfEMP1	Nucleus	Soluble	0.0227	0.3648	0.0023	0.0002	0.0028	0.0047	0.0004	0.6009	0.0011	0.0001
PF3D7_0712900	erythrocyte membrane protein 1, PfEMP1	Nucleus	Soluble	0.0143	0.1513	0.0018	0.0001	0.0036	0.0011	0.0002	0.8268	0.0006	0.0001
PF3D7_0713000	rifin	Cell membrane	Membrane	0.9064	0	0.0456	0.0006	0.0014	0.0018	0.0065	0.0001	0.0005	0.0371
PF3D7_0713100	Pfmc-2TM Maurer's cleft two transmembrane protein	Endoplasmic reticulum	Membrane	0.0503	0.0001	0.8492	0	0.08	0.0022	0.0138	0.0006	0.0025	0.0012
PF3D7_0713600	mitochondrial ribosomal protein S5 precursor, putative	Mitochondrion	Soluble	0.0037	0.2291	0.0058	0.0008	0.0101	0.0071	0.4166	0.3206	0.0048	0.0012
PF3D7_0713900	conserved Plasmodium protein, unknown function	Nucleus	Soluble	0.0009	0.2319	0.001	0.0001	0.0033	0.0412	0.0001	0.7213	0.0001	0
PF3D7_0714000	histone H2B variant	Cytoplasm	Soluble	0.0006	0.5633	0.0001	0.0008	0.0001	0	0.0175	0.4168	0.0007	0
PF3D7_0714200	conserved Plasmodium protein, unknown function	Cytoplasm	Soluble	0.0076	0.6302	0.0087	0.001	0.0384	0.1046	0.002	0.206	0.001	0.0006
PF3D7_0715000	4-nitrophenylphosphatase	Cytoplasm	Soluble	0.0313	0.4871	0.0373	0.0255	0.0445	0.2401	0.0294	0.0593	0.0269	0.0187
PF3D7_0715300	calcium/calmodulin-dependent protein kinase, putative	Endoplasmic reticulum	Soluble	0.0228	0.2164	0.3605	0.0296	0.0467	0.122	0.0715	0.0549	0.0725	0.0032
PF3D7_0715600	GTP-binding translation elongation factor tu family protein, putative	Mitochondrion	Soluble	0.0012	0.0598	0.0023	0.0008	0.0015	0.0008	0.8279	0.0879	0.0158	0.002
PF3D7_0715800	drug/metabolite transporter DMT1, putative	Endoplasmic reticulum	Membrane	0.0802	0.0002	0.535	0	0.2808	0.0995	0.0019	0.0015	0.0008	0
PF3D7_0716200	PDCD2 domain-containing protein, putative	Nucleus	Soluble	0.0006	0.1137	0.0019	0.0008	0.0022	0.0032	0.0014	0.8759	0.0001	0.0001
PF3D7_0716300	conserved protein, unknown function	Extracellular	Soluble	0.0036	0.0024	0.3087	0.554	0.0086	0.1173	0.0037	0.0016	0	0.0001
PF3D7_0717000	conserved Plasmodium membrane protein, unknown function	Endoplasmic reticulum	Membrane	0.0012	0	0.5709	0	0.4183	0.0091	0.0003	0	0.0001	0
PF3D7_0717200	conserved Plasmodium protein, unknown function	Nucleus	Soluble	0.0125	0.2524	0.0322	0.0018	0.058	0.0122	0.0102	0.6177	0.0028	0.0001
PF3D7_0717300	transcription initiation factor IIE subunit alpha, putative	Nucleus	Soluble	0.0015	0.1666	0.0075	0	0.004	0.0017	0.0009	0.8177	0.0001	0.0001
PF3D7_0717500	calcium-dependent protein kinase 4	Cytoplasm	Soluble	0.0089	0.5506	0.0097	0.0003	0.0131	0.0298	0.0007	0.3832	0.003	0.0007
PF3D7_0717700	serine--tRNA ligase, putative	Nucleus	Soluble	0.0084	0.272	0.0064	0.0009	0.0057	0.0046	0.0053	0.6924	0.0036	0.0006
PF3D7_0718000	dynein heavy chain, putative	Cytoplasm	Soluble	0.0025	0.5525	0.0046	0.0001	0.008	0.0142	0.0003	0.4171	0.0006	0
PF3D7_0718100	exported serine/threonine protein kinase	Cytoplasm	Soluble	0.0022	0.5956	0.0013	0	0.0058	0.0098	0.0002	0.3848	0.0003	0
PF3D7_0718300	cysteine repeat modular protein 2	Cell membrane	Membrane	0.8785	0.0001	0.076	0.0001	0.0232	0.0206	0.0003	0.0012	0	0
PF3D7_0718600	conserved Plasmodium protein, unknown function	Nucleus	Soluble	0.0024	0.2969	0.0024	0.0001	0.0085	0.0036	0.0012	0.684	0.0005	0.0003
PF3D7_0718800	conserved protein, unknown function	Lysosome/Vacuole	Membrane	0.0972	0.0032	0.3338	0.0001	0.197	0.3558	0.0053	0.0038	0.003	0.0007
PF3D7_0719000	conserved protein, unknown function	Nucleus	Soluble	0.0018	0.1972	0.0031	0.0008	0.0059	0.0077	0.0073	0.7747	0.0005	0.001
PF3D7_0719100	ATP synthase F0 subunit a-like protein, putative	Endoplasmic reticulum	Membrane	0.0048	0.0007	0.7098	0	0.099	0.001	0.1686	0.0006	0.0153	0.0002
PF3D7_0719200	NIMA related kinase 4	Cytoplasm	Soluble	0.0038	0.5205	0.0089	0.0003	0.0073	0.0032	0.0276	0.4242	0.0035	0.0006
PF3D7_0719400	conserved Plasmodium protein, unknown function	Endoplasmic reticulum	Soluble	0.049	0.0772	0.3948	0.0632	0.1065	0.2041	0.0297	0.0709	0.0039	0.0008
PF3D7_0719500	LEM3/CDC50 family protein, putative	Endoplasmic reticulum	Membrane	0.0368	0.0085	0.6149	0.0002	0.1658	0.0725	0.013	0.0776	0.0079	0.003
PF3D7_0719600	60S ribosomal protein L11a, putative	Cytoplasm	Soluble	0.0023	0.7204	0.0035	0.0016	0.0002	0.0007	0.0615	0.1468	0.0607	0.0022
PF3D7_0719700	40S ribosomal protein S10, putative	Cytoplasm	Soluble	0.0013	0.5633	0.0008	0.0039	0.0002	0.0008	0.0751	0.3474	0.0062	0.001
PF3D7_0721000	conserved Plasmodium membrane protein, unknown function	Nucleus	Soluble	0.0028	0.3479	0.0064	0.0002	0.006	0.0097	0.0005	0.6257	0.0007	0
PF3D7_0721100	conserved protein, unknown function	Extracellular	Soluble	0.0114	0.007	0.3596	0.3648	0.0818	0.1415	0.025	0.007	0.0004	0.0014
PF3D7_0721600	40S ribosomal protein S5, putative	Cytoplasm	Soluble	0.0025	0.5475	0.0008	0.001	0.0003	0.0007	0.0168	0.4055	0.0207	0.0041
PF3D7_0721700	secreted ookinete protein, putative	Extracellular	Soluble	0.0033	0.0031	0.4077	0.5243	0.0008	0.0542	0.006	0.0002	0.0002	0.0002
PF3D7_0722600	U3 small nucleolar RNA-associated protein 7, putative	Nucleus	Soluble	0.0021	0.2134	0.0012	0.0002	0.0011	0.0008	0.0011	0.7793	0.0008	0
PF3D7_0722800	conserved protein, unknown function	Extracellular	Soluble	0.0665	0.0057	0.2632	0.566	0.0389	0.048	0.0047	0.0066	0.0004	0.0001
PF3D7_0723000	tRNAHis guanylyltransferase, putative	Cytoplasm	Soluble	0.0036	0.4912	0.0285	0.0063	0.0199	0.0249	0.0562	0.3576	0.0105	0.0012
PF3D7_0723200	conserved Plasmodium protein, unknown function	Lysosome/Vacuole	Soluble	0.0021	0.0181	0.2628	0.3351	0.0027	0.3742	0.0024	0.0018	0.0005	0.0002
PF3D7_0723400	conserved Plasmodium protein, unknown function	Nucleus	Soluble	0.0011	0.1923	0.0007	0.0001	0.0196	0.017	0.0001	0.7691	0.0001	0
PF3D7_0723500	dynactin subunit 5, putative	Cytoplasm	Soluble	0.0074	0.3719	0.042	0.048	0.0156	0.1295	0.1544	0.1843	0.0214	0.0255
PF3D7_0723700	metallo-hydrolase/oxidoreductase, putative	Golgi apparatus	Membrane	0.1409	0.0163	0.1151	0.0157	0.4875	0.1059	0.054	0.0532	0.0099	0.0016
PF3D7_0723800	conserved Plasmodium protein, unknown function	Cytoplasm	Soluble	0.0028	0.4964	0.008	0.0002	0.0318	0.0367	0.0008	0.4225	0.0007	0.0001
PF3D7_0723900	RNA-binding protein, putative	Nucleus	Soluble	0.0265	0.2821	0.0206	0.0024	0.05	0.0188	0.0028	0.5959	0.0009	0.0001
PF3D7_0724300	ubiquinone biosynthesis O-methyltransferase, putative	Mitochondrion	Soluble	0.0022	0.2147	0.0348	0.003	0.0142	0.0106	0.5933	0.1198	0.0068	0.0005
PF3D7_0724400	mitochondrial import inner membrane translocase subunit TIM14, putative	Mitochondrion	Membrane	0.0009	0.0205	0.0088	0.0209	0.0002	0.0005	0.9378	0.0005	0.0066	0.0031
PF3D7_0724700	conserved Plasmodium protein, unknown function	Cytoplasm	Soluble	0.0017	0.4872	0.0036	0.0001	0.0041	0.0233	0.0005	0.4784	0.0011	0
PF3D7_0725100	conserved Plasmodium membrane protein, unknown function	Nucleus	Soluble	0.0112	0.4137	0.0437	0.0002	0.0377	0.0268	0.0008	0.464	0.0019	0
PF3D7_0725200	mago nashi protein homologue, putative	Cytoplasm	Soluble	0.0062	0.7281	0.0659	0.0033	0.0074	0.0106	0.0113	0.1536	0.0133	0.0003
PF3D7_0726100	Plasmodium exported protein, unknown function	Endoplasmic reticulum	Membrane	0.2492	0.0027	0.301	0.0008	0.224	0.1792	0.0168	0.0185	0.0056	0.0024
PF3D7_0726200	serine/threonine protein kinase, FIKK family	Endoplasmic reticulum	Soluble	0.0248	0.1279	0.3137	0.0078	0.1071	0.029	0.1337	0.2297	0.0249	0.0015
PF3D7_0726400	conserved Plasmodium membrane protein, unknown function	Cytoplasm	Soluble	0.0066	0.5168	0.0525	0.0005	0.043	0.2055	0.0019	0.1715	0.0016	0
PF3D7_0726500	ubiquitin carboxyl-terminal hydrolase, putative	Cytoplasm	Soluble	0.0038	0.5638	0.0009	0.0001	0.0034	0.0163	0.0002	0.4109	0.0004	0
PF3D7_0726600	conserved Plasmodium protein, unknown function	Cytoplasm	Soluble	0.0125	0.4552	0.0336	0.0042	0.0944	0.1159	0.0212	0.242	0.0174	0.0036
PF3D7_0727000	vacuolar protein sorting-associated protein 53, putative	Cytoplasm	Soluble	0.0028	0.6509	0.0062	0.0004	0.0122	0.0188	0.0012	0.3069	0.0006	0.0001
PF3D7_0727200	cysteine desulfurase, putative	Mitochondrion	Soluble	0.0011	0.0772	0.0015	0.0029	0.0031	0.0012	0.8626	0.048	0.002	0.0004
PF3D7_0727800	cation transporting ATPase, putative	Lysosome/Vacuole	Membrane	0.275	0.0008	0.2901	0.0001	0.104	0.326	0.0008	0.0027	0.0004	0
PF3D7_0727900	conserved Plasmodium protein, unknown function	Cytoplasm	Soluble	0.0026	0.6579	0.0063	0.0015	0.0059	0.023	0.0006	0.3016	0.0006	0.0001
PF3D7_0728000	eukaryotic translation initiation factor 2 subunit alpha	Nucleus	Soluble	0.0003	0.1016	0.0008	0	0.0007	0.0022	0.0011	0.8916	0.0005	0.0012
PF3D7_0728200	actin-like protein, putative	Cytoplasm	Soluble	0.003	0.6554	0.0161	0.0033	0.0098	0.0477	0.001	0.2619	0.0017	0.0002
PF3D7_0728300	conserved protein, unknown function	Mitochondrion	Soluble	0.0048	0.217	0.0053	0.0038	0.0028	0.0016	0.5447	0.2095	0.0098	0.0007
PF3D7_0728600	RING zinc finger protein, putative	Nucleus	Soluble	0.0001	0.0186	0	0	0.0001	0	0	0.9812	0	0
PF3D7_0728700	alpha/beta hydrolase, putative	Nucleus	Soluble	0.009	0.2411	0.0147	0.0005	0.0089	0.0145	0.0042	0.7025	0.004	0.0004
PF3D7_0728800	conserved Plasmodium protein, unknown function	Endoplasmic reticulum	Soluble	0.015	0.0564	0.608	0.0513	0.0383	0.0391	0.0654	0.1195	0.0024	0.0047
PF3D7_0729500	mRNA (N6-adenosine)-methyltransferase, putative	Nucleus	Soluble	0.0043	0.3419	0.0039	0.0006	0.007	0.005	0.0009	0.6351	0.0011	0.0001
PF3D7_0729700	conserved protein, unknown function	Cytoplasm	Soluble	0.0063	0.4888	0.1341	0.004	0.0523	0.0924	0.0087	0.2039	0.0088	0.0008
PF3D7_0729800	dynein light chain, putative	Cytoplasm	Soluble	0.0013	0.6601	0.0254	0.0344	0.0015	0.0096	0.1697	0.0862	0.0078	0.004
PF3D7_0729900	dynein heavy chain, putative	Cytoplasm	Soluble	0.0061	0.7439	0.0162	0.0004	0.0393	0.0596	0.0013	0.1316	0.0015	0.0002
PF3D7_0730000	conserved protein, unknown function	Mitochondrion	Membrane	0.0026	0.0028	0.1253	0.0065	0.0258	0.0006	0.8119	0.0017	0.0091	0.0136
PF3D7_0730300	AP2 domain transcription factor AP2-L, putative	Cytoplasm	Soluble	0.0024	0.6041	0.0027	0.0004	0.0075	0.0637	0.0007	0.3174	0.001	0.0001
PF3D7_0730500	conserved Plasmodium protein, unknown function	Nucleus	Soluble	0.0011	0.2846	0.0001	0.0001	0.0012	0.0006	0.0001	0.7121	0.0001	0
PF3D7_0730800	Plasmodium exported protein, unknown function, unspecified product	Extracellular	Soluble	0.0112	0.0122	0.1802	0.3651	0.021	0.0148	0.1779	0.1014	0.0058	0.1102
PF3D7_0730900	EMP1-trafficking protein	Golgi apparatus	Soluble	0.073	0.1634	0.1234	0.003	0.3454	0.059	0.0035	0.2273	0.0016	0.0005
PF3D7_0731100	EMP1-trafficking protein	Golgi apparatus	Membrane	0.021	0.0077	0.1915	0.0019	0.6852	0.0464	0.0222	0.0205	0.0029	0.0006
PF3D7_0731200	Plasmodium exported protein, unknown function	Endoplasmic reticulum	Membrane	0.0306	0.0011	0.4446	0	0.3857	0.1186	0.0027	0.0162	0.0004	0.0002
PF3D7_0731500	erythrocyte binding antigen-175	Endoplasmic reticulum	Membrane	0.1457	0.0574	0.3714	0.0544	0.1715	0.0921	0.0095	0.0944	0.0015	0.0021
PF3D7_0731600	acyl-CoA synthetase	Endoplasmic reticulum	Soluble	0.0074	0.0082	0.8724	0.088	0.0023	0.0111	0.0029	0.0063	0.0003	0.0011
PF3D7_0732000	stevor	Cell membrane	Membrane	0.7765	0	0.1701	0.0003	0.022	0.0271	0.0031	0.0003	0.0005	0.0003
PF3D7_0732200	rifin	Cell membrane	Membrane	0.7996	0	0.1883	0.0001	0.0057	0.0018	0.0021	0.0002	0.0016	0.0005
PF3D7_0732300	rifin	Cell membrane	Membrane	0.8392	0.0001	0.1384	0.0002	0.005	0.0022	0.0064	0.0002	0.0069	0.0014
PF3D7_0732400	rifin	Cell membrane	Membrane	0.8671	0	0.1233	0	0.0068	0.0016	0.0008	0.0001	0.0002	0.0001
PF3D7_0732500	rifin	Cell membrane	Membrane	0.9002	0	0.0792	0.0001	0.007	0.0021	0.0023	0.0003	0.0011	0.0077
PF3D7_0732700	rifin	Endoplasmic reticulum	Membrane	0.4638	0	0.5118	0.0001	0.0196	0.0025	0.0014	0.0001	0.0002	0.0005
PF3D7_0732900	rifin	Cell membrane	Membrane	0.7146	0.0005	0.1632	0.0001	0.0086	0.0235	0.0504	0.002	0.0267	0.0104
PF3D7_0733000	erythrocyte membrane protein 1, PfEMP1	Nucleus	Soluble	0.0297	0.3156	0.0025	0.0003	0.002	0.0023	0.0003	0.646	0.0012	0.0002
PF3D7_0800100	erythrocyte membrane protein 1, PfEMP1	Nucleus	Soluble	0.1865	0.2689	0.0159	0.0006	0.0125	0.0104	0.0027	0.4993	0.0025	0.0008
PF3D7_0800200	erythrocyte membrane protein 1, PfEMP1	Nucleus	Soluble	0.0497	0.4401	0.0074	0.0007	0.0043	0.0135	0.0015	0.4789	0.0035	0.0002
PF3D7_0800300	erythrocyte membrane protein 1, PfEMP1	Cytoplasm	Soluble	0.0383	0.509	0.0049	0.0012	0.0038	0.004	0.001	0.4332	0.0041	0.0005
PF3D7_0800400	rifin	Cell membrane	Membrane	0.7763	0.0005	0.1419	0.0003	0.0088	0.0121	0.0303	0.0018	0.0209	0.0073
PF3D7_0800500	rifin	Cell membrane	Membrane	0.7522	0.0009	0.1905	0.009	0.0058	0.0048	0.0174	0.001	0.0084	0.0101
PF3D7_0800700	surface-associated interspersed protein 8.3 (SURFIN 8.3)	Cytoplasm	Soluble	0.12	0.3014	0.1192	0	0.0506	0.0601	0.022	0.2961	0.0159	0.0147
PF3D7_0801000	Plasmodium exported protein (PHISTc), unknown function	Golgi apparatus	Membrane	0.0161	0.037	0.1315	0.0033	0.6113	0.0259	0.0155	0.1572	0.0019	0.0003
PF3D7_0801600	conserved protein, unknown function	Endoplasmic reticulum	Membrane	0.0033	0.0072	0.7438	0.0001	0.0118	0.0018	0.1332	0.003	0.0933	0.0026
PF3D7_0801700	sentrin-specific protease 2, putative	Nucleus	Soluble	0.0034	0.3324	0.0034	0.0003	0.0096	0.0422	0.0004	0.6073	0.0009	0
PF3D7_0801800	mannose-6-phosphate isomerase, putative	Nucleus	Soluble	0.0044	0.2855	0.0038	0.0003	0.0108	0.0185	0.0066	0.6686	0.0011	0.0001
PF3D7_0801900	lysine-specific histone demethylase, putative	Nucleus	Soluble	0.0008	0.132	0	0	0.0002	0.0001	0	0.8668	0	0
PF3D7_0802000	glutamate dehydrogenase, putative	Cytoplasm	Soluble	0.008	0.7021	0.0045	0.0011	0.0073	0.051	0.0015	0.2178	0.0053	0.0014
PF3D7_0802300	periodic tryptophan protein 2, putative	Nucleus	Soluble	0.0079	0.1354	0.0207	0.0042	0.0147	0.0187	0.0272	0.7631	0.0058	0.0022
PF3D7_0802600	adenylyl cyclase beta	Cytoplasm	Soluble	0.0053	0.498	0.0036	0.0004	0.0082	0.0235	0.0007	0.4581	0.0019	0.0001
PF3D7_0802800	serine/threonine protein phosphatase 2B catalytic subunit A	Nucleus	Soluble	0.0047	0.4527	0.0086	0.0006	0.0088	0.017	0.0009	0.5031	0.0035	0.0002
PF3D7_0803200	filament assembling protein, putative	Cytoplasm	Soluble	0.0076	0.5907	0.0065	0.0002	0.0478	0.0181	0.0023	0.3261	0.0005	0.0003
PF3D7_0803400	DNA repair and recombination protein RAD54, putative	Nucleus	Soluble	0.0014	0.2098	0.0008	0	0.0025	0.0036	0.0001	0.7817	0.0001	0
PF3D7_0803600	conserved Plasmodium protein, unknown function	Nucleus	Soluble	0.0092	0.2643	0.1862	0.0008	0.0654	0.0609	0.0239	0.367	0.0221	0.0002
PF3D7_0804000	cactin homolog, putative	Nucleus	Soluble	0.0018	0.1994	0.0017	0.0002	0.0017	0.0021	0.0002	0.7921	0.0006	0.0001
PF3D7_0804500	conserved Plasmodium membrane protein, unknown function	Cytoplasm	Soluble	0.0187	0.4479	0.0168	0.0005	0.0185	0.1565	0.001	0.3381	0.002	0.0001
PF3D7_0804600	tRNA pseudouridine synthase, putative	Nucleus	Soluble	0.0023	0.3042	0.0038	0.0004	0.0037	0.0019	0.0023	0.6801	0.0014	0.0001
PF3D7_0804800	peptidyl-prolyl cis-trans isomerase	Cytoplasm	Soluble	0.0095	0.5874	0.0129	0.0198	0.0075	0.0417	0.0038	0.3109	0.0059	0.0006
PF3D7_0804900	GTPase-activating protein, putative	Cytoplasm	Soluble	0.0667	0.2486	0.0649	0.0087	0.2144	0.1127	0.046	0.2186	0.0128	0.0065
PF3D7_0805100	conserved Plasmodium protein, unknown function	Nucleus	Soluble	0.0069	0.2809	0.0027	0.0006	0.0032	0.0055	0.031	0.652	0.011	0.0061
PF3D7_0805300	conserved Plasmodium protein, unknown function	Nucleus	Soluble	0.0016	0.144	0.0003	0.0002	0.0015	0.0006	0.001	0.8506	0.0002	0
PF3D7_0805400	N-acetyltransferase, GNAT family, putative	Cytoplasm	Soluble	0.0011	0.6006	0.0085	0.0003	0.0062	0.0113	0.0023	0.365	0.0045	0.0002
PF3D7_0805700	serine/threonine protein kinase, FIKK family	Cytoplasm	Soluble	0.0056	0.6559	0.0049	0.0015	0.0097	0.0328	0.0011	0.2874	0.001	0.0001
PF3D7_0806000	AAA family ATPase, putative	Nucleus	Soluble	0.0043	0.4361	0.0075	0.0011	0.0058	0.0072	0.0268	0.5015	0.0085	0.0011
PF3D7_0806200	Dpy-19-like C-mannosyltransferase, putative	Endoplasmic reticulum	Membrane	0.0541	0.0044	0.5123	0	0.2257	0.1999	0.0016	0.0013	0.0006	0
PF3D7_0806300	ferlin, putative	Cell membrane	Membrane	0.2793	0.0593	0.2256	0.0007	0.0914	0.189	0.0289	0.0985	0.0244	0.003
PF3D7_0806500	DnaJ protein, putative	Nucleus	Soluble	0.023	0.4016	0.045	0.004	0.0311	0.0388	0.0097	0.4176	0.023	0.0061
PF3D7_0806600	kinesin-like protein, putative	Nucleus	Soluble	0.0086	0.4756	0.0053	0.0003	0.0128	0.0141	0.004	0.4757	0.0034	0.0002
PF3D7_0806700	conserved Plasmodium membrane protein, unknown function	Cytoplasm	Soluble	0.0102	0.4568	0.0334	0.0011	0.0288	0.1581	0.0036	0.3039	0.0039	0.0002
PF3D7_0806800	V-type proton ATPase subunit a, putative	Lysosome/Vacuole	Membrane	0.1685	0.0031	0.293	0.0001	0.0863	0.4211	0.0032	0.021	0.0033	0.0003
PF3D7_0806900	conserved protein, unknown function	Golgi apparatus	Membrane	0.0015	0.001	0.1954	0.0002	0.7625	0.0019	0.035	0.0021	0.0003	0.0001
PF3D7_0807100	DNA helicase PSH3	Nucleus	Soluble	0.0036	0.4231	0.0022	0.0004	0.0023	0.0084	0.0005	0.5589	0.0006	0.0001
PF3D7_0807700	serine protease DegP	Endoplasmic reticulum	Soluble	0.0491	0.0282	0.552	0.1183	0.056	0.0697	0.0571	0.0495	0.0073	0.0127
PF3D7_0807800	26S proteasome regulatory subunit RPN10, putative	Cytoplasm	Soluble	0.0029	0.5526	0.0127	0.0012	0.0404	0.0722	0.0017	0.3159	0.0004	0.0001
PF3D7_0808100	AP-3 complex subunit delta, putative	Cytoplasm	Soluble	0.0085	0.4942	0.1286	0.0015	0.1029	0.1339	0.0093	0.1172	0.0035	0.0004
PF3D7_0808200	plasmepsin X	Extracellular	Soluble	0.0233	0.0718	0.2235	0.2541	0.0645	0.0832	0.1262	0.1338	0.0153	0.0042
PF3D7_0808400	coatomer subunit epsilon, putative	Cytoplasm	Soluble	0.0016	0.567	0.0369	0.0027	0.0186	0.2796	0.001	0.0919	0.0005	0.0002
PF3D7_0808600	erythrocyte membrane protein 1, PfEMP1	Nucleus	Soluble	0.0498	0.0999	0.0048	0.0002	0.0034	0.0013	0.0011	0.8344	0.0046	0.0006
PF3D7_0808700	erythrocyte membrane protein 1, PfEMP1	Nucleus	Soluble	0.0056	0.1344	0.0003	0	0.001	0.001	0.0001	0.8573	0.0001	0
PF3D7_0808800	rifin	Cell membrane	Membrane	0.7211	0	0.2371	0.0001	0.028	0.0111	0.0012	0.0005	0.0006	0.0003
PF3D7_0808900	rifin	Cell membrane	Membrane	0.762	0	0.2136	0.0003	0.0148	0.0017	0.0052	0.0003	0.0019	0.0002
PF3D7_0809100	erythrocyte membrane protein 1, PfEMP1	Cytoplasm	Soluble	0.0342	0.5104	0.0063	0.0006	0.0063	0.0281	0.0017	0.4076	0.0042	0.0004
PF3D7_0809200	asparagine-rich antigen Pfa55-14	Cytoplasm	Soluble	0.0085	0.4866	0.0112	0.0011	0.0193	0.1809	0.0011	0.2894	0.0016	0.0002
PF3D7_0809500	histone acetyltransferase subunit NuA4, putative	Nucleus	Soluble	0.003	0.2081	0.0005	0.0027	0.0008	0.0002	0.1006	0.6831	0.0009	0.0002
PF3D7_0809600	peptidase family C50, putative	Cytoplasm	Soluble	0.0117	0.502	0.0285	0.0005	0.0202	0.1025	0.0014	0.3314	0.0019	0
PF3D7_0809900	JmjC domain-containing protein, putative	Nucleus	Soluble	0.0022	0.1403	0.0015	0.0001	0.002	0.0087	0.0003	0.8441	0.0007	0
PF3D7_0810300	protein phosphatase PPM5, putative	Nucleus	Membrane	0.3346	0.0139	0.0357	0.0008	0.0466	0.0097	0.0018	0.5542	0.0009	0.0018
PF3D7_0810800	hydroxymethyldihydropterin pyrophosphokinase-dihydropteroate synthase	Cytoplasm	Soluble	0.005	0.5967	0.0339	0.0014	0.0389	0.162	0.0042	0.1541	0.0024	0.0015
PF3D7_0810900	conserved Plasmodium protein, unknown function	Cytoplasm	Soluble	0.0023	0.5653	0.0195	0.001	0.0086	0.051	0.0016	0.3498	0.0007	0.0002
PF3D7_0811600	conserved protein, unknown function	Endoplasmic reticulum	Soluble	0.0006	0.0196	0.6659	0.2135	0.0062	0.0827	0.0072	0.0042	0.0001	0.0001
PF3D7_0812100	proteasome activator complex subunit 4, putative	Cytoplasm	Soluble	0.0067	0.6406	0.0288	0.0003	0.0459	0.0702	0.0013	0.2046	0.0016	0
PF3D7_0812400	karyopherin alpha	Nucleus	Soluble	0.0086	0.1527	0.001	0.0002	0.0026	0.0018	0.0007	0.8314	0.0007	0.0003
PF3D7_0812600	ubiquitin-conjugating enzyme E2, putative	Mitochondrion	Soluble	0.0061	0.1712	0.0082	0.0015	0.0175	0.0033	0.5429	0.2329	0.0157	0.0007
PF3D7_0812700	U1 small nuclear ribonucleoprotein C, putative	Nucleus	Soluble	0.0002	0.2529	0.0004	0.0001	0.0006	0.0012	0.0023	0.7423	0.0001	0
PF3D7_0812900	conserved Plasmodium protein, unknown function	Endoplasmic reticulum	Membrane	0.2479	0.0003	0.4227	0	0.0993	0.2203	0.0029	0.0036	0.0028	0.0001
PF3D7_0813400	conserved protein, unknown function	Cytoplasm	Soluble	0.0032	0.532	0.0026	0.001	0.0063	0.0121	0.0017	0.4398	0.0013	0.0001
PF3D7_0813700	ABC transporter F family member 1	Endoplasmic reticulum	Soluble	0.0131	0.0265	0.515	0.151	0.0138	0.017	0.064	0.1853	0.0004	0.014
PF3D7_0813900	40S ribosomal protein S16, putative	Cytoplasm	Soluble	0.0001	0.9654	0.0001	0.0002	0	0	0.0094	0.0108	0.0139	0.0001
PF3D7_0814600	conserved protein, unknown function	Cytoplasm	Soluble	0.0521	0.5283	0.0129	0.0675	0.0106	0.076	0.034	0.1781	0.0196	0.0208
PF3D7_0815100	heptatricopeptide repeat and RAP domain-containing protein, putative	Nucleus	Soluble	0.0022	0.3225	0.0041	0.0001	0.0066	0.003	0.0015	0.659	0.0009	0.0001
PF3D7_0815300	FAD-dependent monooxygenase, putative	Cytoplasm	Soluble	0.0103	0.4397	0.0485	0.0098	0.0233	0.056	0.2775	0.0584	0.0743	0.0021
PF3D7_0815400	ATP synthase-associated protein, putative	Cytoplasm	Soluble	0.0041	0.5624	0.0285	0.017	0.0184	0.0571	0.0939	0.2125	0.0044	0.0016
PF3D7_0815500	conserved Plasmodium protein, unknown function	Nucleus	Soluble	0.0069	0.2043	0.2701	0.0014	0.0603	0.0879	0.0041	0.3606	0.0042	0.0002
PF3D7_0816100	phosphopantothenoylcysteine decarboxylase, putative	Cytoplasm	Soluble	0.0094	0.6314	0.0179	0.0312	0.0168	0.0569	0.0225	0.2064	0.0036	0.0038
PF3D7_0816200	vacuolar protein sorting-associated protein 2, putative	Golgi apparatus	Soluble	0.1106	0.1845	0.0311	0.0011	0.212	0.2089	0.0387	0.2105	0.0008	0.0018
PF3D7_0816500	small heat shock protein HSP20, putative	Cell membrane	Membrane	0.5738	0.1796	0.0019	0.0066	0.0105	0.1165	0.0063	0.0728	0.0009	0.0311
PF3D7_0816600	chaperone protein ClpB1	Endoplasmic reticulum	Membrane	0.0196	0.0821	0.6838	0.0145	0.0324	0.0332	0.0719	0.0196	0.0043	0.0386
PF3D7_0816700	trafficking protein particle complex subunit 2-like protein, putative	Cytoplasm	Soluble	0.0039	0.4777	0.0282	0.024	0.0154	0.0815	0.0132	0.3393	0.0047	0.0122
PF3D7_0817300	conserved Plasmodium protein, unknown function	Cytoplasm	Soluble	0.0034	0.5735	0.0014	0.002	0.003	0.0688	0.0007	0.347	0.0002	0.0001
PF3D7_0817700	rhoptry neck protein 5	Endoplasmic reticulum	Membrane	0.0096	0.0322	0.6365	0.1142	0.007	0.0116	0.1636	0.0066	0.01	0.0087
PF3D7_0818500	zinc finger protein, putative	Nucleus	Soluble	0.0074	0.1503	0.0005	0.0192	0.0022	0.0018	0.196	0.6219	0.0001	0.0005
PF3D7_0818900	heat shock protein 70	Cytoplasm	Soluble	0.0163	0.8898	0.0013	0.0007	0.0026	0.0087	0.0067	0.0497	0.017	0.0071
PF3D7_0819600	conserved Plasmodium protein, unknown function	Nucleus	Soluble	0.0017	0.1556	0.0021	0.0002	0.0048	0.0069	0.0014	0.8268	0.0005	0
PF3D7_0819800	conserved Plasmodium protein, unknown function	Nucleus	Soluble	0.0008	0.3821	0.0156	0	0.0086	0.0033	0.0005	0.5888	0.0003	0
PF3D7_0820600	conserved protein, unknown function	Endoplasmic reticulum	Membrane	0.0211	0.0018	0.8865	0.0015	0.0671	0.0063	0.0105	0.001	0.0041	0
PF3D7_0821000	conserved Plasmodium protein, unknown function	Endoplasmic reticulum	Membrane	0.0285	0.0034	0.8001	0	0.125	0.0308	0.0022	0.0049	0.005	0
PF3D7_0821300	ATP-dependent RNA helicase DHX36, putative	Nucleus	Soluble	0.0014	0.1703	0.0021	0.0002	0.0031	0.0008	0.0048	0.8162	0.0012	0.0001
PF3D7_0821500	ribosomal RNA small subunit methyltransferase NEP1, putative	Nucleus	Soluble	0.0028	0.3486	0.0035	0.0012	0.0036	0.0052	0.0033	0.6262	0.0051	0.0005
PF3D7_0821600	polyribonucleotide 5'-hydroxyl-kinase Clp1, putative	Cytoplasm	Soluble	0.006	0.6542	0.0154	0.0028	0.0132	0.0462	0.0101	0.2447	0.0069	0.0005
PF3D7_0822600	protein transport protein SEC23	Cytoplasm	Soluble	0.0155	0.7535	0.0052	0.0036	0.0068	0.0242	0.0025	0.1734	0.0143	0.0009
PF3D7_0823300	histone acetyltransferase GCN5	Cytoplasm	Soluble	0.0023	0.623	0.0061	0.0005	0.0148	0.0244	0.0006	0.326	0.0021	0.0002
PF3D7_0823500	inner membrane complex protein 1i, putative	Cytoplasm	Soluble	0.0089	0.4749	0.0041	0.0023	0.0121	0.0185	0.0073	0.4634	0.0063	0.0022
PF3D7_0823800	DnaJ protein, putative	Endoplasmic reticulum	Membrane	0.0313	0.0102	0.6169	0.0001	0.2193	0.0632	0.0178	0.0302	0.011	0.0002
PF3D7_0823900	dicarboxylate/tricarboxylate carrier	Mitochondrion	Membrane	0.0023	0.0031	0.0348	0.0002	0.0004	0.0003	0.6599	0.0002	0.293	0.0056
PF3D7_0824200	conserved Plasmodium protein, unknown function	Cytoplasm	Soluble	0.0015	0.72	0.0075	0.0011	0.0083	0.0359	0.0014	0.2234	0.0009	0.0001
PF3D7_0824600	Fe-S cluster assembly protein DRE2, putative	Nucleus	Soluble	0.0027	0.1847	0.0052	0.0053	0.0047	0.011	0.028	0.7556	0.0015	0.0012
PF3D7_0824700	lipase maturation factor, putative	Endoplasmic reticulum	Membrane	0.0603	0.0001	0.563	0	0.2109	0.1644	0.0006	0.0005	0.0002	0
PF3D7_0825200	translation initiation factor IF-3	Extracellular	Soluble	0.0309	0.0139	0.1585	0.5596	0.0438	0.0091	0.171	0.0112	0.0015	0.0005
PF3D7_0825600	cytochrome c oxidase assembly factor 5, putative	Mitochondrion	Soluble	0.0005	0.0137	0	0.2485	0.0001	0.0001	0.7001	0.037	0	0
PF3D7_0825800	conserved protein, unknown function	Endoplasmic reticulum	Soluble	0.0034	0.0089	0.629	0.0425	0.1458	0.016	0.0673	0.0863	0.0003	0.0005
PF3D7_0826000	conserved Plasmodium protein, unknown function	Nucleus	Soluble	0.0033	0.2378	0.0036	0.001	0.0054	0.0067	0.0172	0.7241	0.0007	0.0001
PF3D7_0826100	HECT-like E3 ubiquitin ligase, putative	Cytoplasm	Soluble	0.0036	0.7024	0.0084	0.0003	0.0264	0.0736	0.0002	0.1847	0.0005	0
PF3D7_0826300	SPRY domain, putative	Nucleus	Soluble	0.0173	0.4096	0.0097	0.0095	0.0093	0.0408	0.0093	0.473	0.0143	0.0073
PF3D7_0826400	dehydrodolichyl diphosphate synthetase, putative	Endoplasmic reticulum	Membrane	0.0094	0.2129	0.3992	0.0075	0.0779	0.0853	0.1022	0.0508	0.0507	0.0041
PF3D7_0826500	ubiquitin conjugation factor E4 B, putative	Cytoplasm	Soluble	0.0024	0.7195	0.0063	0	0.0165	0.0178	0.0007	0.236	0.0008	0
PF3D7_0826700	receptor for activated c kinase	Cytoplasm	Soluble	0.0201	0.5025	0.0076	0.099	0.0037	0.047	0.0161	0.2622	0.014	0.0277
PF3D7_0827100	translation initiation factor IF-2, putative	Cytoplasm	Soluble	0.0043	0.6939	0.0014	0.0005	0.0036	0.0208	0.0032	0.2704	0.0016	0.0004
PF3D7_0827600	conserved Plasmodium protein, unknown function	Endoplasmic reticulum	Soluble	0.0197	0.1159	0.3828	0.0328	0.052	0.0432	0.0229	0.3271	0.0011	0.0024
PF3D7_0827800	SET domain protein, putative	Nucleus	Soluble	0.0027	0.2797	0.0007	0.0002	0.0021	0.0093	0.0002	0.7047	0.0003	0
PF3D7_0827900	protein disulfide isomerase	Endoplasmic reticulum	Soluble	0.0005	0.0038	0.8691	0.0285	0.0045	0.0919	0.0012	0.0004	0	0
PF3D7_0828100	conserved Plasmodium protein, unknown function	Cytoplasm	Soluble	0.0116	0.3696	0.1905	0.0021	0.0604	0.0518	0.0418	0.2597	0.0119	0.0005
PF3D7_0828200	leucine--tRNA ligase, putative	Endoplasmic reticulum	Membrane	0.0159	0.0242	0.7399	0.0373	0.0276	0.0143	0.111	0.0198	0.0086	0.0015
PF3D7_0828400	mitochondrial inner membrane protein OXA1, putative	Endoplasmic reticulum	Membrane	0.0418	0.0196	0.3223	0.0063	0.0633	0.135	0.174	0.0512	0.1615	0.0251
PF3D7_0828500	translation initiation factor eIF-2B subunit alpha, putative	Lysosome/Vacuole	Soluble	0.0471	0.2813	0.0756	0.0548	0.0382	0.3491	0.019	0.1306	0.0013	0.0031
PF3D7_0829000	conserved Plasmodium membrane protein, unknown function	Cytoplasm	Soluble	0.0103	0.399	0.0649	0.0009	0.0415	0.2932	0.0009	0.1869	0.0019	0.0004
PF3D7_0829600	early transcribed membrane protein 8	Endoplasmic reticulum	Membrane	0.1349	0.0061	0.4227	0.2132	0.0532	0.0319	0.1074	0.0013	0.0122	0.0171
PF3D7_0830600	Plasmodium exported protein (PHISTc), unknown function	Golgi apparatus	Soluble	0.0024	0.0339	0.3371	0.0004	0.3813	0.0731	0.0185	0.1524	0.0006	0.0002
PF3D7_0830800	surface-associated interspersed protein 8.2 (SURFIN 8.2)	Nucleus	Soluble	0.0089	0.2682	0.0408	0	0.0517	0.0249	0.0017	0.602	0.001	0.0008
PF3D7_0831100	surface-associated interspersed protein 8.1 (SURFIN 8.1)	Nucleus	Membrane	0.0112	0.1571	0.162	0	0.0731	0.0155	0.2361	0.2626	0.0175	0.0649
PF3D7_0831200	DnaJ protein, putative	Endoplasmic reticulum	Membrane	0.0232	0.0578	0.3073	0.0002	0.2642	0.0618	0.0485	0.2201	0.0151	0.0016
PF3D7_0831300	Plasmodium exported protein, unknown function	Endoplasmic reticulum	Membrane	0.0011	0.0127	0.546	0.0065	0.2227	0.0044	0.068	0.13	0.0081	0.0005
PF3D7_0831400	Plasmodium exported protein, unknown function	Endoplasmic reticulum	Soluble	0.0026	0.0011	0.5181	0.3643	0.0274	0.0558	0.0187	0.0117	0	0.0001
PF3D7_0831500	Plasmodium exported protein (PHIST), unknown function	Golgi apparatus	Membrane	0.0082	0.0125	0.1761	0.0016	0.5264	0.0193	0.1104	0.138	0.0062	0.0013
PF3D7_0831700	heat shock protein 70	Endoplasmic reticulum	Soluble	0.0029	0.0024	0.8282	0.1216	0.0036	0.039	0.0013	0.0007	0.0001	0.0002
PF3D7_0831800	histidine-rich protein II	Extracellular	Soluble	0.0196	0.0238	0.0028	0.5555	0.0047	0.0155	0.0821	0.2958	0	0.0001
PF3D7_0832000	stevor	Cell membrane	Membrane	0.4817	0.0006	0.1613	0.0025	0.0432	0.0297	0.1185	0.006	0.0144	0.142
PF3D7_0832300	Plasmodium exported protein (PHISTa-like), unknown function	Golgi apparatus	Membrane	0.0434	0.0173	0.2177	0.0006	0.6158	0.0847	0.012	0.0066	0.0017	0.0003
PF3D7_0832400	stevor	Cell membrane	Membrane	0.9143	0	0.0679	0.0002	0.0098	0.0065	0.001	0	0.0002	0
PF3D7_0832800	rifin	Cell membrane	Membrane	0.5339	0.0019	0.181	0.0074	0.0123	0.0126	0.1804	0.0035	0.0535	0.0135
PF3D7_0832900	stevor	Cell membrane	Membrane	0.9515	0	0.0349	0.0002	0.0038	0.0076	0.0016	0	0.0001	0.0001
PF3D7_0833000	rifin	Cell membrane	Membrane	0.8619	0.0013	0.0717	0.0226	0.0034	0.0036	0.023	0.0019	0.0068	0.0038
PF3D7_0833100	rifin	Cell membrane	Membrane	0.6795	0.0064	0.1718	0.0038	0.0104	0.006	0.0718	0.009	0.0295	0.0118
PF3D7_0833200	rifin	Cell membrane	Membrane	0.648	0	0.2526	0.0001	0.0789	0.0076	0.0085	0.0001	0.0004	0.0037
PF3D7_0833300	erythrocyte membrane protein 1 (PfEMP1), exon 2, pseudogene	Nucleus	Soluble	0.0045	0.4134	0.0157	0.004	0.0104	0.0533	0.019	0.4706	0.0039	0.0054
PF3D7_0833400	rifin	Cell membrane	Membrane	0.9701	0	0.0219	0.0001	0.002	0.0013	0.0014	0.0001	0.0007	0.0023
PF3D7_0833500	erythrocyte membrane protein 1, PfEMP1	Nucleus	Soluble	0.0177	0.1851	0.0005	0.0001	0.0012	0.0007	0.0002	0.7934	0.0009	0.0001
PF3D7_0900100	erythrocyte membrane protein 1, PfEMP1	Nucleus	Soluble	0.0347	0.1247	0.0029	0.0001	0.0011	0.0004	0.0003	0.8336	0.0021	0.0003
PF3D7_0900200	rifin	Cell membrane	Membrane	0.7247	0.0003	0.2398	0.0003	0.0072	0.0022	0.0102	0.0005	0.0095	0.0053
PF3D7_0900300	rifin	Cell membrane	Membrane	0.6595	0	0.2729	0.0001	0.038	0.0027	0.0203	0.0003	0.0014	0.0047
PF3D7_0900400	rifin	Cell membrane	Membrane	0.3753	0.0027	0.1363	0.0008	0.0095	0.0097	0.3047	0.0031	0.076	0.082
PF3D7_0900500	rifin	Cell membrane	Membrane	0.706	0.0001	0.2239	0.0005	0.0108	0.0022	0.0422	0.0006	0.0034	0.0102
PF3D7_0900600	rifin	Cell membrane	Membrane	0.861	0	0.1274	0.0001	0.0047	0.0006	0.0023	0.0003	0.0024	0.0012
PF3D7_0900700	rifin	Cell membrane	Membrane	0.8447	0.0001	0.0871	0.0004	0.0042	0.0018	0.036	0.0002	0.0026	0.0229
PF3D7_0900900	stevor	Cell membrane	Membrane	0.8968	0	0.0453	0.0026	0.0096	0.039	0.0056	0.0002	0.0005	0.0004
PF3D7_0901000	rifin	Cell membrane	Membrane	0.7263	0	0.2491	0.0001	0.0179	0.0024	0.0021	0.0001	0.0002	0.0018
PF3D7_0901100	rifin	Cell membrane	Membrane	0.9696	0	0.0156	0	0.0058	0.0046	0.0037	0.0002	0.0003	0.0001
PF3D7_0901300	rifin	Cell membrane	Membrane	0.4375	0.0013	0.1526	0.0004	0.0128	0.0109	0.2692	0.0045	0.0302	0.0806
PF3D7_0901400	rifin	Cell membrane	Membrane	0.8337	0	0.1362	0.0003	0.0065	0.0046	0.0052	0.0002	0.0015	0.0117
PF3D7_0901500	rifin	Cell membrane	Membrane	0.6601	0	0.3032	0	0.0175	0.0082	0.0035	0.0004	0.0019	0.0052
PF3D7_0901600	stevor	Cell membrane	Membrane	0.9713	0	0.0222	0.0001	0.0034	0.0025	0.0004	0	0	0
PF3D7_0901800	Plasmodium exported protein, unknown function	Mitochondrion	Membrane	0.0053	0.037	0.245	0.0046	0.1125	0.0082	0.5582	0.017	0.0121	0
PF3D7_0902200	serine/threonine protein kinase, FIKK family	Endoplasmic reticulum	Soluble	0.0107	0.0242	0.819	0.0366	0.0209	0.0572	0.0119	0.017	0.0016	0.0009
PF3D7_0902300	serine/threonine protein kinase, FIKK family	Golgi apparatus	Membrane	0.0035	0.0005	0.3547	0.0001	0.6338	0.0033	0.002	0.0018	0.0002	0.0001
PF3D7_0902400	serine/threonine protein kinase, FIKK family	Endoplasmic reticulum	Soluble	0.009	0.0912	0.6185	0.0884	0.0147	0.1351	0.0182	0.0193	0.0048	0.0009
PF3D7_0902600	serine/threonine protein kinase, FIKK family	Endoplasmic reticulum	Membrane	0.0328	0.0918	0.6158	0.0663	0.0463	0.0839	0.0214	0.0362	0.0048	0.0007
PF3D7_0902800	serine repeat antigen 9	Extracellular	Soluble	0.0021	0.0021	0.0532	0.9191	0.0008	0.0217	0.0002	0.0008	0	0
PF3D7_0902900	conserved Plasmodium protein, unknown function	Extracellular	Soluble	0.0239	0.0007	0.3414	0.5483	0.0235	0.0413	0.0196	0.0003	0.0007	0.0005
PF3D7_0903000	conserved protein, unknown function	Mitochondrion	Membrane	0.002	0.0243	0.0603	0.0013	0.0221	0.003	0.8016	0.0358	0.0402	0.0094
PF3D7_0903300	conserved protein, unknown function	Cytoplasm	Soluble	0.0036	0.5287	0.0027	0.0001	0.0034	0.0183	0.0001	0.4425	0.0005	0
PF3D7_0903400	ATP-dependent RNA helicase DDX60, putative	Nucleus	Soluble	0.0023	0.4023	0.007	0.0001	0.0109	0.0074	0.0005	0.569	0.0004	0.0001
PF3D7_0903500	nucleoporin NUP138, putative	Cytoplasm	Soluble	0.0135	0.699	0.0093	0.0004	0.0857	0.0519	0.0008	0.1377	0.0012	0.0005
PF3D7_0903700	alpha tubulin 1	Cytoplasm	Soluble	0.0034	0.7021	0.0043	0.0024	0.003	0.0163	0.0118	0.237	0.0099	0.0098
PF3D7_0903800	LCCL domain-containing protein	Endoplasmic reticulum	Soluble	0.0257	0.1604	0.3468	0.2151	0.027	0.1633	0.0108	0.0473	0.0026	0.0009
PF3D7_0904900	copper-transporting ATPase	Endoplasmic reticulum	Membrane	0.1302	0.0095	0.4173	0.0002	0.1719	0.0905	0.0128	0.1649	0.0013	0.0014
PF3D7_0905100	nucleoporin NUP221, putative	Cytoplasm	Soluble	0.0061	0.7779	0.0054	0.0002	0.0207	0.0258	0.0002	0.1627	0.001	0
PF3D7_0905300	dynein heavy chain, putative	Cytoplasm	Soluble	0.002	0.5313	0.0026	0	0.0093	0.0121	0.0002	0.4423	0.0001	0
PF3D7_0905400	high molecular weight rhoptry protein 3	Endoplasmic reticulum	Membrane	0.0038	0.0043	0.8159	0.002	0.1404	0.0093	0.0086	0.0153	0.0003	0.0002
PF3D7_0905600	WD repeat-containing protein 66, putative	Cytoplasm	Soluble	0.0042	0.487	0.0122	0.0006	0.0143	0.0449	0.0041	0.4296	0.0016	0.0016
PF3D7_0905900	coatomer subunit beta, putative	Nucleus	Soluble	0.0018	0.4559	0.009	0.0004	0.017	0.0302	0.0013	0.4838	0.0006	0.0001
PF3D7_0906200	conserved Plasmodium protein, unknown function	Endoplasmic reticulum	Soluble	0.0248	0.0623	0.4906	0.2211	0.0201	0.0799	0.0554	0.0404	0.0047	0.0006
PF3D7_0906300	Maf-like protein, putative	Cytoplasm	Soluble	0.0162	0.4493	0.0676	0.0047	0.0492	0.0901	0.0097	0.298	0.0132	0.0021
PF3D7_0906400	dynein intermediate light chain, putative	Cytoplasm	Soluble	0.0031	0.6411	0.0095	0.0005	0.0192	0.0497	0.0015	0.2732	0.002	0.0002
PF3D7_0906500	arginase	Cytoplasm	Soluble	0.0035	0.7848	0.0086	0.0136	0.0016	0.0499	0.0054	0.0807	0.046	0.0059
PF3D7_0906890	conserved Plasmodium protein, unknown function	Cytoplasm	Soluble	0.0022	0.5352	0.0266	0.0083	0.0095	0.0211	0.0521	0.3427	0.0022	0.0002
PF3D7_0907200	GTPase-activating protein, putative	Cytoplasm	Soluble	0.0177	0.3463	0.0773	0.0006	0.0793	0.1496	0.0019	0.3246	0.0026	0.0001
PF3D7_0907600	translation initiation factor SUI1, putative	Cytoplasm	Soluble	0.0031	0.5222	0.0049	0.0005	0.0127	0.01	0.0033	0.441	0.0022	0.0001
PF3D7_0907700	proteasome activator 28 subunit beta, putative	Cytoplasm	Soluble	0.0073	0.5335	0.025	0.0018	0.019	0.0466	0.005	0.3512	0.0048	0.0059
PF3D7_0908200	conserved Plasmodium protein, unknown function	Nucleus	Soluble	0.0018	0.4326	0.0018	0.0003	0.0021	0.0264	0.0015	0.533	0.0005	0
PF3D7_0908300	conserved protein, unknown function	Endoplasmic reticulum	Membrane	0.0124	0	0.8948	0	0.0917	0.0006	0.0003	0	0.0002	0
PF3D7_0908400	conserved Plasmodium protein, unknown function	Endoplasmic reticulum	Membrane	0.0014	0.0125	0.8438	0	0.0221	0.0003	0.0273	0.0042	0.0884	0
PF3D7_0908500	conserved Plasmodium protein, unknown function	Nucleus	Soluble	0.0056	0.4064	0.0246	0.0003	0.0122	0.0151	0.0054	0.5232	0.0071	0.0001
PF3D7_0908700	tRNA pseudouridine synthase, putative	Endoplasmic reticulum	Soluble	0.0052	0.2522	0.285	0.198	0.0083	0.1424	0.0337	0.0701	0.0032	0.0019
PF3D7_0909100	conserved Plasmodium membrane protein, unknown function	Endoplasmic reticulum	Membrane	0.0501	0.0116	0.4433	0.0001	0.1397	0.3343	0.0017	0.0186	0.0007	0
PF3D7_0909500	subpellicular microtubule protein 1, putative	Nucleus	Soluble	0.0056	0.346	0.0001	0.0006	0.0003	0.0005	0.0014	0.6436	0.0014	0.0005
PF3D7_0909600	conserved protein, unknown function	Endoplasmic reticulum	Soluble	0.0018	0.0162	0.9036	0.006	0.0286	0.0322	0.0053	0.0061	0.0001	0.0002
PF3D7_0909700	FHA domain protein, putative	Nucleus	Soluble	0.0015	0.2856	0.0013	0.0009	0.0025	0.0227	0.0013	0.6835	0.0006	0
PF3D7_0909900	helicase SKI2W, putative	Nucleus	Soluble	0.0011	0.3347	0.0023	0.0001	0.0061	0.0077	0.0013	0.6464	0.0003	0.0001
PF3D7_0910000	SET domain protein, putative	Cytoplasm	Soluble	0.0133	0.4715	0.0086	0.0009	0.019	0.0268	0.0043	0.4525	0.0029	0.0004
PF3D7_0910200	conserved Plasmodium protein, unknown function	Nucleus	Soluble	0.002	0.3553	0.0016	0.0003	0.0182	0.0194	0.0005	0.6026	0.0002	0.0001
PF3D7_0910400	selenide water dikinase, putative	Nucleus	Soluble	0.015	0.3353	0.0517	0.0023	0.0388	0.0456	0.0335	0.4682	0.0083	0.0012
PF3D7_0910900	DNA primase large subunit, putative	Nucleus	Soluble	0.0055	0.2918	0.0066	0.0027	0.0079	0.0043	0.1236	0.5436	0.0127	0.0012
PF3D7_0911100	conserved protein, unknown function	Nucleus	Soluble	0.0051	0.261	0.0025	0.0004	0.0064	0.0065	0.0003	0.7172	0.0006	0
PF3D7_0911300	cysteine repeat modular protein 1	Cell membrane	Membrane	0.6656	0	0.1893	0.0001	0.0649	0.0773	0.0004	0.0022	0.0001	0
PF3D7_0911900	falstatin	Extracellular	Soluble	0.0038	0.0015	0.0351	0.9433	0.0012	0.0091	0.0033	0.0026	0	0.0001
PF3D7_0912500	SAP domain-containing protein, putative	Nucleus	Soluble	0.0001	0.0076	0	0.0001	0.0001	0.0001	0.0005	0.9914	0	0
PF3D7_0912600	conserved Plasmodium protein, unknown function	Nucleus	Soluble	0.0237	0.2452	0.0135	0.0014	0.0185	0.0093	0.0089	0.6685	0.0107	0.0003
PF3D7_0912800	tRNA (adenine(58)-N(1))-methyltransferase non-catalytic subunit TRM6, putative	Nucleus	Soluble	0.0023	0.3253	0.0055	0.0002	0.0313	0.0293	0.0147	0.5887	0.0025	0.0002
PF3D7_0912900	26S proteasome regulatory subunit RPN8, putative	Cytoplasm	Soluble	0.0036	0.5918	0.0639	0.0007	0.0148	0.0187	0.002	0.3018	0.0026	0.0002
PF3D7_0913500	protease, putative	Endoplasmic reticulum	Membrane	0.0023	0.0001	0.8371	0	0.0791	0.0794	0.0017	0.0001	0.0003	0
PF3D7_0914000	pseudouridylate synthase, putative	Endoplasmic reticulum	Membrane	0.0167	0.0676	0.6587	0.0137	0.0615	0.0464	0.0275	0.105	0.0023	0.0006
PF3D7_0914100	conserved Plasmodium protein, unknown function	Nucleus	Soluble	0.0022	0.2688	0.0019	0.0002	0.0036	0.0056	0.001	0.7163	0.0002	0.0001
PF3D7_0914200	phospholipid or glycerol acyltransferase, putative	Endoplasmic reticulum	Membrane	0.0194	0.0001	0.7697	0	0.1901	0.018	0.0017	0.0001	0.0008	0
PF3D7_0914800	GINS complex subunit Psf3, putative	Cytoplasm	Soluble	0.0019	0.7586	0.0179	0.0006	0.0111	0.0243	0.0025	0.1795	0.0031	0.0005
PF3D7_0915300	heptatricopeptide repeat-containing protein, putative	Mitochondrion	Soluble	0.004	0.3309	0.0215	0.0012	0.031	0.0152	0.4885	0.1014	0.0057	0.0005
PF3D7_0915400	ATP-dependent 6-phosphofructokinase	Cytoplasm	Soluble	0.0232	0.6627	0.0301	0.0062	0.0097	0.0572	0.0183	0.114	0.0746	0.004
PF3D7_0916200	conserved Plasmodium protein, unknown function	Endoplasmic reticulum	Membrane	0.0085	0.0248	0.4709	0.0007	0.4137	0.032	0.0197	0.0262	0.0033	0.0001
PF3D7_0916700	RNA-binding protein musashi, putative	Nucleus	Soluble	0.0009	0.3502	0.0028	0.0006	0.0046	0.0054	0.0038	0.6273	0.0042	0.0001
PF3D7_0916800	conserved Plasmodium protein, unknown function	Mitochondrion	Membrane	0.0095	0.1559	0.0663	0.0507	0.0373	0.0219	0.5128	0.1114	0.0241	0.0102
PF3D7_0917000	merozoite organizing protein	Cytoplasm	Soluble	0.0023	0.5545	0.0072	0.0001	0.0161	0.0199	0.0005	0.399	0.0005	0
PF3D7_0917200	conserved protein, unknown function	Golgi apparatus	Membrane	0.0891	0.0002	0.2817	0	0.5206	0.106	0.0014	0.0007	0.0003	0
PF3D7_0917300	conserved protein, unknown function	Endoplasmic reticulum	Membrane	0.1199	0	0.5883	0	0.2482	0.0428	0.0005	0.0001	0.0001	0
PF3D7_0917500	conserved protein, unknown function	Cytoplasm	Soluble	0.0052	0.4959	0.0155	0.0006	0.0299	0.0443	0.0037	0.4009	0.0033	0.0009
PF3D7_0917900	heat shock protein 70	Endoplasmic reticulum	Soluble	0.0008	0.001	0.9309	0.0304	0.0071	0.0288	0.0009	0.0002	0	0.0001
PF3D7_0918000	glideosome-associated protein 50	Cell membrane	Membrane	0.7507	0	0.2115	0.0033	0.0159	0.0161	0.002	0	0.0002	0.0002
PF3D7_0918300	eukaryotic translation initiation factor 3 subunit F, putative	Cytoplasm	Soluble	0.0031	0.5569	0.0418	0.0023	0.0561	0.0543	0.0619	0.2201	0.0032	0.0003
PF3D7_0918900	gamma-glutamylcysteine synthetase	Nucleus	Soluble	0.0035	0.3279	0.0044	0.0002	0.03	0.0127	0.0024	0.6181	0.0006	0.0002
PF3D7_0919200	PPPDE peptidase, putative	Cytoplasm	Soluble	0.0034	0.4074	0.0269	0.059	0.0125	0.2028	0.1271	0.1508	0.0044	0.0058
PF3D7_0919400	protein disulfide isomerase	Endoplasmic reticulum	Soluble	0.0018	0.0193	0.7921	0.0042	0.0407	0.1315	0.0015	0.0088	0	0.0001
PF3D7_0919800	TLD domain-containing protein	Cytoplasm	Soluble	0.0065	0.7474	0.0048	0.0014	0.0084	0.0597	0.0006	0.169	0.002	0.0002
PF3D7_0919900	regulator of chromosome condensation-PP1-interacting protein	Nucleus	Soluble	0.0055	0.3204	0.0023	0.0002	0.0143	0.0358	0.0004	0.6205	0.0007	0
PF3D7_0920300	conserved Plasmodium protein, unknown function	Endoplasmic reticulum	Soluble	0.0012	0.0063	0.6315	0.1872	0.0026	0.1607	0.0028	0.0072	0	0.0005
PF3D7_0920400	conserved Plasmodium protein, unknown function	Cytoplasm	Soluble	0.0054	0.3536	0.1845	0.0002	0.118	0.1427	0.003	0.1903	0.0023	0
PF3D7_0920800	inosine-5'-monophosphate dehydrogenase	Cytoplasm	Soluble	0.0079	0.5295	0.0038	0.0109	0.0006	0.0528	0.0172	0.0227	0.3248	0.0299
PF3D7_0920900	U4/U6 snRNA-associated-splicing factor, putative	Nucleus	Soluble	0.0001	0.0107	0.0001	0	0	0	0	0.9891	0	0
PF3D7_0921200	conserved Plasmodium membrane protein, unknown function	Nucleus	Soluble	0.0027	0.4356	0.0353	0.0002	0.0304	0.0271	0.0027	0.4637	0.0022	0.0001
PF3D7_0921400	NifU-like scaffold protein	Endoplasmic reticulum	Soluble	0.009	0.0279	0.6762	0.0903	0.0252	0.1473	0.012	0.011	0.0002	0.0009
PF3D7_0921800	ribosome production factor 1, putative	Nucleus	Soluble	0.0007	0.0926	0.0005	0.0001	0.0002	0.0002	0.0003	0.9046	0.0009	0
PF3D7_0922100	ubiquitin-like protein, putative	Nucleus	Soluble	0.0068	0.3598	0.011	0.0003	0.0182	0.0693	0.0008	0.5324	0.0014	0
PF3D7_0922200	S-adenosylmethionine synthetase	Cytoplasm	Soluble	0.0021	0.6321	0.0037	0.0039	0.0003	0.0093	0.0308	0.0618	0.2332	0.0227
PF3D7_0922500	phosphoglycerate kinase	Cytoplasm	Soluble	0.0083	0.5757	0.0046	0.0043	0.0014	0.0135	0.1524	0.0118	0.1996	0.0283
PF3D7_0922800	conserved Plasmodium protein, unknown function	Nucleus	Soluble	0.0025	0.4623	0.0033	0.0001	0.0029	0.01	0.0003	0.5179	0.0005	0
PF3D7_0923800	thioredoxin reductase	Mitochondrion	Soluble	0.0002	0.018	0.0011	0.0006	0.0001	0.0005	0.8331	0.0006	0.0113	0.1345
PF3D7_0924000	patatin-like phospholipase, putative	Endoplasmic reticulum	Membrane	0.0867	0.0151	0.3977	0.0019	0.2828	0.1307	0.0234	0.0468	0.014	0.001
PF3D7_0924200	heptatricopeptide repeat-containing protein, putative	Cytoplasm	Soluble	0.0112	0.4699	0.0618	0.0031	0.0451	0.1406	0.0893	0.1644	0.0141	0.0006
PF3D7_0924600	conserved Plasmodium protein, unknown function	Nucleus	Soluble	0.0053	0.4266	0.0011	0.0002	0.006	0.0137	0.0003	0.5464	0.0003	0.0001
PF3D7_0925300	proline--tRNA ligase, putative	Mitochondrion	Membrane	0.007	0.0937	0.2937	0.0545	0.0176	0.0151	0.4235	0.0729	0.0108	0.0113
PF3D7_0925800	armadillo repeat protein, putative	Cytoplasm	Soluble	0.0028	0.5785	0.0124	0.0003	0.0175	0.0211	0.0006	0.3658	0.0009	0
PF3D7_0925900	parasitophorous vacuolar protein 5, putative	Extracellular	Soluble	0.0011	0.0047	0.3157	0.5467	0.0014	0.1263	0.0014	0.0018	0.0002	0.0007
PF3D7_0926200	conserved Plasmodium protein, unknown function	Extracellular	Membrane	0.0649	0.0006	0.2514	0.3674	0.2401	0.0453	0.0216	0.0005	0	0.0081
PF3D7_0926500	tetratricopeptide repeat protein, putative	Cytoplasm	Soluble	0.0125	0.5018	0.0671	0.002	0.0465	0.1497	0.0024	0.2154	0.0025	0.0001
PF3D7_0927300	fumarate hydratase	Mitochondrion	Soluble	0.0029	0.3642	0.0148	0.0149	0.001	0.0105	0.5283	0.0113	0.0423	0.0099
PF3D7_0927700	serine/threonine protein phosphatase 4, putative	Cytoplasm	Soluble	0.0074	0.6909	0.0244	0.0265	0.0044	0.0507	0.0178	0.1455	0.0143	0.0182
PF3D7_0927800	cytochrome c oxidase subunit 5B, putative	Mitochondrion	Soluble	0.0014	0.0893	0.0023	0.004	0.001	0.0048	0.8821	0.0108	0.0023	0.002
PF3D7_0927900	phosphatidylserine decarboxylase	Golgi apparatus	Membrane	0.0016	0.002	0.458	0.0002	0.5025	0.0039	0.021	0.0006	0.0099	0.0004
PF3D7_0928600	conserved Plasmodium protein, unknown function	Endoplasmic reticulum	Membrane	0.0065	0.0568	0.3833	0.0014	0.0286	0.0042	0.288	0.0214	0.2054	0.0044
PF3D7_0928700	conserved Plasmodium protein, unknown function	Cytoplasm	Soluble	0.0069	0.4084	0.09	0.0037	0.0371	0.0368	0.0376	0.3704	0.0082	0.0009
PF3D7_0929000	transcription initiation factor TFIID subunit 7, putative	Cytoplasm	Soluble	0.0028	0.6066	0.0138	0.0009	0.0138	0.0551	0.0014	0.304	0.0013	0.0003
PF3D7_0929600	G2 protein, putative	Nucleus	Membrane	0.2396	0.1691	0.0312	0.0012	0.1537	0.0325	0.0191	0.3517	0.0016	0.0004
PF3D7_0929800	conserved Plasmodium protein, unknown function	Golgi apparatus	Membrane	0.0145	0.0067	0.1155	0.0014	0.4396	0.008	0.3692	0.0247	0.019	0.0014
PF3D7_0929900	conserved Plasmodium protein, unknown function	Endoplasmic reticulum	Membrane	0.0028	0.0029	0.7166	0.0031	0.0336	0.0014	0.2221	0.0011	0.0145	0.0018
PF3D7_0930100	heptatricopeptide repeat-containing protein, putative	Endoplasmic reticulum	Soluble	0.0087	0.0742	0.5731	0.0043	0.0877	0.0924	0.0474	0.1034	0.0052	0.0034
PF3D7_0930200	leucine-rich repeat protein	Cytoplasm	Soluble	0.0017	0.5403	0.0212	0.0002	0.027	0.0223	0.0016	0.3852	0.0004	0.0001
PF3D7_0930300	merozoite surface protein 1	Cell membrane	Membrane	0.5452	0.0002	0.3168	0.0004	0.104	0.0316	0.0004	0.0014	0	0
PF3D7_0930600	peptidyl-prolyl cis-trans isomerase	Nucleus	Soluble	0.0034	0.1489	0.0021	0.0004	0.0051	0.001	0.0055	0.8322	0.0013	0.0001
PF3D7_0930700	conserved Plasmodium protein, unknown function	Nucleus	Soluble	0.002	0.4779	0.0035	0.0012	0.0026	0.01	0.0022	0.4987	0.0016	0.0002
PF3D7_0931300	conserved Plasmodium protein, unknown function	Nucleus	Soluble	0.0376	0.0793	0.0956	0.0825	0.0688	0.1007	0.0796	0.3123	0.0004	0.1433
PF3D7_0931400	PUB domain-containing protein, putative	Nucleus	Soluble	0.0059	0.4081	0.0239	0.0001	0.0522	0.0791	0.0009	0.4285	0.0006	0.0006
PF3D7_0931600	conserved protein, unknown function	Cytoplasm	Soluble	0.004	0.609	0.0172	0.0006	0.0101	0.0315	0.0026	0.3212	0.0028	0.0009
PF3D7_0931700	PIH1 domain-containing protein, putative	Nucleus	Soluble	0.0031	0.3953	0.0187	0.0001	0.073	0.0209	0.0012	0.4872	0.0004	0.0001
PF3D7_0931800	proteasome subunit beta type-6, putative	Cytoplasm	Soluble	0.0146	0.4468	0.0152	0.014	0.0082	0.0511	0.0337	0.3614	0.0237	0.0311
PF3D7_0932100	protein MAM3, putative	Endoplasmic reticulum	Membrane	0.1094	0.0101	0.6005	0.0093	0.1046	0.042	0.0156	0.098	0.0077	0.0028
PF3D7_0932300	M18 aspartyl aminopeptidase	Cytoplasm	Soluble	0.0294	0.5432	0.0476	0.0084	0.0246	0.0719	0.0271	0.1967	0.0488	0.0022
PF3D7_0932700	conserved Plasmodium protein, unknown function	Cytoplasm	Soluble	0.0036	0.511	0.0894	0.0008	0.0564	0.0217	0.0999	0.2123	0.0046	0.0002
PF3D7_0933100	conserved Plasmodium protein, unknown function	Endoplasmic reticulum	Membrane	0.0231	0.0245	0.5346	0.0001	0.0895	0.0119	0.0154	0.2764	0.0242	0.0002
PF3D7_0933500	gamma-tubulin complex component, putative	Cytoplasm	Soluble	0.0048	0.4994	0.0117	0.0009	0.0118	0.024	0.0042	0.4347	0.0081	0.0006
PF3D7_0933600	mitochondrial-processing peptidase subunit beta, putative	Mitochondrion	Soluble	0.0003	0.0067	0.0004	0.0001	0.0005	0.0002	0.9848	0.0058	0.0009	0.0002
PF3D7_0933900	conserved Plasmodium protein, unknown function	Nucleus	Soluble	0.0043	0.4168	0.0204	0.0043	0.0296	0.0474	0.0056	0.4651	0.0064	0.0001
PF3D7_0934300	ATP synthase-associated protein, putative	Mitochondrion	Membrane	0.0033	0.0168	0.2606	0.0223	0.0045	0.0015	0.5793	0.0049	0.1062	0.0008
PF3D7_0935600	gametocytogenesis-implicated protein	Cytoplasm	Soluble	0.0018	0.4949	0.0067	0.0013	0.0121	0.0872	0.0012	0.3882	0.0058	0.0009
PF3D7_0935800	cytoadherence linked asexual protein 9	Endoplasmic reticulum	Soluble	0.0139	0.0772	0.6944	0.025	0.0381	0.0835	0.0334	0.0219	0.0098	0.0028
PF3D7_0935900	ring-exported protein 1	Golgi apparatus	Membrane	0.0065	0.0123	0.2363	0.0001	0.6991	0.012	0.009	0.0245	0.0001	0.0001
PF3D7_0936200	Plasmodium exported protein (hyp11), unknown function	Endoplasmic reticulum	Soluble	0.0021	0.019	0.7275	0.0923	0.0081	0.1114	0.0253	0.0082	0.0003	0.0058
PF3D7_0936300	ring-exported protein 3	Golgi apparatus	Membrane	0.0015	0.0071	0.3282	0.0008	0.6206	0.008	0.0246	0.0089	0.0003	0.0001
PF3D7_0936400	ring-exported protein 4	Endoplasmic reticulum	Membrane	0.0148	0.0161	0.5526	0.0017	0.2629	0.0704	0.0612	0.0148	0.0051	0.0005
PF3D7_0936500	virulence-associated protein 1	Endoplasmic reticulum	Membrane	0.0143	0.0002	0.8526	0	0.1179	0.0016	0.0093	0.0003	0.0037	0.0001
PF3D7_0936600	gametocyte exported protein 5	Endoplasmic reticulum	Membrane	0.0166	0.0163	0.653	0.0018	0.1998	0.0579	0.0146	0.0345	0.002	0.0035
PF3D7_0936700	lysophospholipase, putative	Cytoplasm	Soluble	0.0138	0.4413	0.0747	0.0105	0.0584	0.1992	0.0195	0.1538	0.024	0.0048
PF3D7_0936800	Plasmodium exported protein (PHISTc), unknown function	Golgi apparatus	Membrane	0.0025	0.0002	0.0626	0.0038	0.8876	0.0025	0.018	0.0227	0	0
PF3D7_0937000	Plasmodium exported protein (PHISTb), unknown function	Endoplasmic reticulum	Membrane	0.0044	0.0127	0.6076	0.0021	0.3122	0.0129	0.0343	0.0113	0.0022	0.0003
PF3D7_0937200	lysophospholipase, putative	Cytoplasm	Soluble	0.0169	0.5135	0.0613	0.0118	0.0147	0.1069	0.0241	0.1037	0.1302	0.017
PF3D7_0937300	rifin	Cell membrane	Membrane	0.8874	0	0.0901	0	0.0077	0.0066	0.0072	0.0001	0.0005	0.0003
PF3D7_0937400	rifin	Cell membrane	Membrane	0.5719	0	0.3842	0	0.0338	0.0093	0.0005	0.0001	0.0001	0.0001
PF3D7_0937500	rifin	Cell membrane	Membrane	0.3784	0.0027	0.2272	0.0003	0.0189	0.0116	0.2453	0.0046	0.0364	0.0747
PF3D7_0937600	erythrocyte membrane protein 1, PfEMP1	Cytoplasm	Soluble	0.1123	0.4092	0.016	0.0037	0.01	0.0494	0.0198	0.3067	0.0692	0.0037
PF3D7_0937700	rifin	Cell membrane	Membrane	0.7492	0.0009	0.1618	0.006	0.0089	0.0205	0.0217	0.0038	0.0172	0.01
PF3D7_0937800	erythrocyte membrane protein 1, PfEMP1	Nucleus	Soluble	0.0277	0.1532	0.009	0.0002	0.0059	0.0009	0.0013	0.7985	0.0027	0.0006
PF3D7_1000100	erythrocyte membrane protein 1, PfEMP1	Nucleus	Soluble	0.0437	0.2864	0.0052	0.0003	0.0042	0.0035	0.0006	0.6542	0.0017	0.0003
PF3D7_1000200	rifin	Cell membrane	Membrane	0.837	0.0012	0.1038	0.0024	0.0076	0.0073	0.0213	0.003	0.0159	0.0005
PF3D7_1000300	rifin	Cell membrane	Membrane	0.8822	0	0.102	0.0009	0.0068	0.007	0.0008	0	0.0001	0.0001
PF3D7_1000400	rifin	Cell membrane	Membrane	0.9212	0	0.0692	0.0001	0.0056	0.0011	0.001	0.0003	0.0005	0.0009
PF3D7_1000500	rifin	Cell membrane	Membrane	0.948	0	0.0417	0.0001	0.0011	0.0008	0.006	0.0001	0.0003	0.002
PF3D7_1001300	Plasmodium exported protein (PHISTa), unknown function	Golgi apparatus	Membrane	0.0076	0.0088	0.3995	0.0003	0.4801	0.082	0.0098	0.0112	0.0005	0.0002
PF3D7_1001500	early transcribed membrane protein 10.1	Mitochondrion	Membrane	0.162	0.0027	0.08	0.2227	0.0394	0.0316	0.4281	0.0126	0.0062	0.0147
PF3D7_1001600	exported lipase 2	Mitochondrion	Soluble	0.0056	0.0792	0.0433	0.0021	0.0495	0.0081	0.4347	0.3644	0.0111	0.0021
PF3D7_1001700	Plasmodium exported protein (PHISTc), unknown function	Endoplasmic reticulum	Soluble	0.018	0.0132	0.4478	0.3628	0.0235	0.0413	0.0579	0.034	0.0004	0.001
PF3D7_1001900	Plasmodium exported protein (hyp16), unknown function	Endoplasmic reticulum	Membrane	0.0126	0.0093	0.6853	0.0004	0.201	0.0303	0.0299	0.01	0.0208	0.0005
PF3D7_1002100	EMP1-trafficking protein	Endoplasmic reticulum	Membrane	0.0328	0.0143	0.5045	0.0016	0.2362	0.0072	0.0381	0.0998	0.0648	0.0007
PF3D7_1002500	conserved protein, unknown function	Nucleus	Soluble	0.0335	0.3205	0.0407	0.0197	0.0422	0.0555	0.1077	0.3748	0.0043	0.001
PF3D7_1002800	DnaJ protein, putative	Nucleus	Soluble	0.0011	0.3761	0.0012	0.0001	0.0024	0.0099	0.0004	0.6084	0.0004	0
PF3D7_1003100	conserved protein, unknown function	Mitochondrion	Membrane	0.0254	0.0023	0.0043	0.003	0.0125	0.0009	0.9372	0.0017	0.0018	0.0108
PF3D7_1003400	conserved Plasmodium protein, unknown function	Nucleus	Soluble	0.0045	0.4738	0.0024	0.0003	0.0058	0.0146	0.0005	0.4974	0.0007	0
PF3D7_1003600	inner membrane complex protein 1c, putative	Cytoplasm	Soluble	0.0818	0.4744	0.0131	0.0069	0.2061	0.0793	0.0125	0.1176	0.0039	0.0044
PF3D7_1003800	U5 small nuclear ribonucleoprotein component, putative	Nucleus	Soluble	0.0004	0.0861	0.0015	0	0.0038	0.0094	0.0004	0.8979	0.0003	0.0001
PF3D7_1004200	WD repeat-containing protein, putative	Nucleus	Soluble	0.0075	0.3973	0.0101	0.0002	0.0099	0.0162	0.0015	0.5539	0.0032	0.0002
PF3D7_1004300	E3 ubiquitin-protein ligase, putative	Nucleus	Soluble	0.0006	0.1768	0.001	0.0008	0.0034	0.0178	0.0002	0.7995	0	0
PF3D7_1004800	ADP/ATP carrier protein, putative	Endoplasmic reticulum	Membrane	0.0071	0.0009	0.7138	0	0.0263	0.0005	0.2023	0.0044	0.0446	0
PF3D7_1005000	methionine--tRNA ligase, putative	Endoplasmic reticulum	Membrane	0.0341	0.0779	0.6741	0.0291	0.0546	0.0559	0.0238	0.0456	0.0028	0.002
PF3D7_1005300	conserved Plasmodium protein, unknown function	Endoplasmic reticulum	Membrane	0.0237	0.0025	0.7596	0.0002	0.1616	0.0179	0.0276	0.0032	0.0026	0.0012
PF3D7_1005500	regulator of nonsense transcripts 1, putative	Nucleus	Soluble	0.0015	0.3402	0.0003	0.0002	0.0006	0.0014	0.0001	0.6555	0.0003	0
PF3D7_1005700	peptidase, putative	Mitochondrion	Soluble	0.0097	0.1815	0.0836	0.0231	0.0271	0.0268	0.5982	0.0423	0.0074	0.0001
PF3D7_1006000	IMP1-like protein, putative	Nucleus	Soluble	0.1663	0.1781	0.0124	0.0034	0.024	0.007	0.0015	0.6068	0.0002	0.0003
PF3D7_1006500	conserved Plasmodium protein, unknown function	Mitochondrion	Soluble	0.0015	0.2632	0.0209	0.0065	0.0463	0.0207	0.4112	0.1365	0.0051	0.0881
PF3D7_1007000	transmembrane protein 147, putative	Endoplasmic reticulum	Membrane	0.0061	0	0.7489	0	0.238	0.0044	0.002	0.0002	0.0005	0
PF3D7_1007300	RING zinc finger protein, putative	Nucleus	Soluble	0.0042	0.2815	0.0044	0.0022	0.0071	0.0049	0.0462	0.6458	0.0022	0.0014
PF3D7_1007700	AP2 domain transcription factor AP2-I	Nucleus	Soluble	0.0022	0.4777	0.0007	0.0003	0.0028	0.0148	0.0004	0.5008	0.0003	0
PF3D7_1007800	conserved Plasmodium protein, unknown function	Mitochondrion	Soluble	0.0021	0.0829	0.014	0.0007	0.0225	0.003	0.6289	0.2276	0.0112	0.0072
PF3D7_1008000	histone deacetylase 2	Nucleus	Soluble	0.0014	0.2268	0.0002	0.0001	0.0007	0.0017	0	0.769	0.0001	0
PF3D7_1008100	zinc finger protein, putative	Nucleus	Soluble	0.0015	0.1917	0.0005	0	0.0013	0.0082	0.0001	0.7964	0.0002	0
PF3D7_1008200	endonuclease, putative	Mitochondrion	Soluble	0.0029	0.0973	0.0284	0.0031	0.0423	0.0035	0.6661	0.1389	0.013	0.0044
PF3D7_1008400	26S protease regulatory subunit 4, putative	Nucleus	Soluble	0.1092	0.0752	0.0009	0.0004	0.0008	0.0003	0.0018	0.8067	0.0015	0.0032
PF3D7_1008600	zinc finger (CCCH type) protein, putative	Nucleus	Soluble	0.0004	0.1408	0.0007	0.0008	0.0018	0.0315	0.0098	0.8137	0.0003	0.0001
PF3D7_1008700	tubulin beta chain	Cytoplasm	Soluble	0.0015	0.6197	0.0033	0.0013	0.0024	0.0174	0.0102	0.33	0.0073	0.0067
PF3D7_1008800	nucleolar protein 5, putative	Nucleus	Soluble	0.005	0.0852	0.002	0.0027	0.0004	0.0005	0.0104	0.8831	0.0043	0.0064
PF3D7_1009000	diphthine methyl ester synthase, putative	Cytoplasm	Soluble	0.0015	0.7565	0.0066	0.004	0.006	0.0518	0.0122	0.1566	0.0014	0.0033
PF3D7_1009300	conserved Plasmodium protein, unknown function	Mitochondrion	Soluble	0.004	0.2822	0.0187	0.0058	0.0145	0.0127	0.3218	0.313	0.0234	0.0039
PF3D7_1009500	metalloprotease, putative	Nucleus	Soluble	0.0004	0.0946	0.002	0	0.0003	0.0001	0.0006	0.9017	0.0002	0
PF3D7_1009600	protein phosphatase PPM10, putative	Extracellular	Soluble	0.0165	0.0489	0.2027	0.4477	0.0188	0.1674	0.0496	0.0406	0.0016	0.0062
PF3D7_1010200	DNA2/NAM7 helicase, putative	Nucleus	Soluble	0.0031	0.3515	0.0039	0.0001	0.0117	0.0773	0.0009	0.5502	0.0011	0.0001
PF3D7_1010900	conserved Plasmodium protein, unknown function	Cytoplasm	Soluble	0.0102	0.4803	0.1132	0.0045	0.0595	0.1486	0.0086	0.1714	0.003	0.0008
PF3D7_1011300	protein ARV1, putative	Endoplasmic reticulum	Membrane	0.0221	0.0042	0.6836	0.0005	0.1138	0.1603	0.0042	0.0053	0.0058	0
PF3D7_1011400	proteasome subunit beta type-5	Cytoplasm	Soluble	0.0021	0.607	0.0225	0.01	0.0014	0.2042	0.0208	0.0762	0.0275	0.0282
PF3D7_1011500	conserved protein, unknown function	Endoplasmic reticulum	Membrane	0.3035	0	0.4316	0	0.2581	0.0062	0.0005	0.0001	0	0
PF3D7_1011700	DNA repair protein RAD23, putative	Nucleus	Soluble	0.0002	0.0294	0.0008	0	0.0035	0.0013	0.0006	0.964	0	0.0001
PF3D7_1011800	PRE-binding protein	Nucleus	Soluble	0.0085	0.1873	0.007	0.0002	0.0161	0.0032	0.0009	0.7764	0.0003	0.0001
PF3D7_1011900	heme oxygenase	Mitochondrion	Soluble	0.0021	0.0733	0.1985	0.1712	0.0026	0.0365	0.5022	0.0096	0.0018	0.0022
PF3D7_1012000	RING zinc finger protein, putative	Nucleus	Soluble	0.0006	0.2274	0.0008	0	0.0004	0.0002	0.0001	0.7703	0.0001	0
PF3D7_1012100	conserved protein, unknown function	Mitochondrion	Soluble	0.0002	0.03	0.0005	0.0001	0.0004	0.0001	0.7536	0.2141	0.0008	0.0001
PF3D7_1012200	rhoptry associated adhesin	Extracellular	Soluble	0.002	0.0024	0.3409	0.6224	0.009	0.0124	0.0037	0.0072	0	0
PF3D7_1012400	hypoxanthine-guanine phosphoribosyltransferase	Cytoplasm	Soluble	0.0354	0.5842	0.0138	0.0298	0.0099	0.0614	0.0214	0.204	0.0224	0.0176
PF3D7_1012500	phosphoglucomutase, putative	Cytoplasm	Soluble	0.0114	0.7135	0.0491	0.005	0.0139	0.0712	0.0138	0.0805	0.0349	0.0066
PF3D7_1012600	GMP synthase [glutamine-hydrolyzing]	Cytoplasm	Soluble	0.0156	0.6896	0.0259	0.0148	0.0092	0.1508	0.003	0.0505	0.0361	0.0044
PF3D7_1012700	NLI interacting factor-like phosphatase, putative	Nucleus	Soluble	0.0018	0.4469	0.004	0.0002	0.0093	0.0229	0.001	0.5133	0.0004	0.0001
PF3D7_1013100	U3 small nucleolar RNA-associated protein 13, putative	Nucleus	Soluble	0.0011	0.3302	0.0053	0.0001	0.0095	0.0189	0.0016	0.6326	0.0006	0.0001
PF3D7_1013200	conserved Plasmodium protein, unknown function	Nucleus	Soluble	0.0043	0.2103	0.0024	0.0001	0.0036	0.0076	0.0007	0.7677	0.0031	0.0001
PF3D7_1013400	conserved Plasmodium protein, unknown function	Nucleus	Soluble	0.0017	0.3412	0.0031	0.0003	0.0108	0.004	0.0056	0.6323	0.0007	0.0004
PF3D7_1013700	conserved Plasmodium protein, unknown function	Endoplasmic reticulum	Soluble	0.0045	0.2559	0.3844	0.1305	0.0082	0.0364	0.0991	0.0232	0.0578	0.0001
PF3D7_1013900	translation initiation factor eIF-2B subunit delta, putative	Nucleus	Soluble	0.0039	0.3852	0.0018	0.0005	0.0027	0.0085	0.001	0.5952	0.0011	0.0001
PF3D7_1014000	GDP-L-fucose synthase	Cytoplasm	Soluble	0.0067	0.7094	0.0262	0.015	0.0081	0.0541	0.0642	0.0959	0.0162	0.0042
PF3D7_1014100	merozoite surface protein MSA180, putative	Endoplasmic reticulum	Soluble	0.0018	0.0369	0.5591	0.1659	0.0162	0.2119	0.0017	0.0064	0.0001	0
PF3D7_1014300	SPRY domain-containing protein, putative	Nucleus	Soluble	0.0034	0.0874	0.0457	0.0001	0.027	0.0056	0.0005	0.8296	0.0007	0
PF3D7_1014500	conserved Plasmodium protein, unknown function	Cytoplasm	Soluble	0.0088	0.4721	0.0281	0.0009	0.0286	0.0704	0.0035	0.3848	0.0027	0.0002
PF3D7_1014600	transcriptional coactivator ADA2	Nucleus	Soluble	0.0044	0.3892	0.0006	0	0.0015	0.0024	0	0.6017	0.0001	0
PF3D7_1014800	conserved Plasmodium protein, unknown function	Cytoplasm	Soluble	0.0052	0.6287	0.0366	0.0006	0.0293	0.0735	0.0026	0.2223	0.0009	0.0003
PF3D7_1014900	conserved Plasmodium protein, unknown function	Cytoplasm	Soluble	0.0095	0.6403	0.005	0.0003	0.0247	0.0256	0.0013	0.2925	0.0007	0.0001
PF3D7_1015100	CWC16 domain-containing protein, putative	Nucleus	Soluble	0.0008	0.1082	0.005	0.0001	0.0464	0.0045	0.0043	0.8286	0.0019	0.0002
PF3D7_1015200	cysteine--tRNA ligase	Endoplasmic reticulum	Soluble	0.0012	0.0091	0.9359	0.0214	0.0035	0.0069	0.0185	0.0019	0.0003	0.0013
PF3D7_1015500	conserved Plasmodium protein, unknown function	Mitochondrion	Soluble	0.0034	0.2368	0.0536	0.0187	0.0266	0.0373	0.4911	0.1155	0.0114	0.0056
PF3D7_1015900	enolase	Cytoplasm	Soluble	0.0026	0.7151	0.0009	0.0026	0.0001	0.0054	0.0517	0.0055	0.192	0.0241
PF3D7_1016000	conserved Plasmodium protein, unknown function	Nucleus	Soluble	0.0059	0.2938	0.0015	0.0007	0.0032	0.0052	0.0034	0.678	0.0083	0.0001
PF3D7_1016200	Rab3 GTPase-activating protein non-catalytic subunit, putative	Cytoplasm	Soluble	0.0027	0.7076	0.0197	0.0009	0.0361	0.0278	0.01	0.1857	0.0086	0.0007
PF3D7_1016300	GBP130 protein	Golgi apparatus	Membrane	0.0009	0.007	0.2152	0.0002	0.7085	0.0062	0.0288	0.0326	0.0005	0.0002
PF3D7_1016500	Plasmodium exported protein (PHISTc), unknown function	Nucleus	Soluble	0.0283	0.0628	0.142	0.0014	0.0507	0.0058	0.0023	0.7023	0.0044	0.0001
PF3D7_1016700	Plasmodium exported protein (PHISTc), unknown function	Nucleus	Soluble	0.027	0.0989	0.1837	0.0097	0.1361	0.0514	0.0201	0.4619	0.011	0.0002
PF3D7_1016900	early transcribed membrane protein 10.3	Golgi apparatus	Membrane	0.0661	0.0006	0.1852	0.2066	0.3298	0.0213	0.1736	0.0089	0.0023	0.0057
PF3D7_1017000	DNA polymerase delta catalytic subunit	Cytoplasm	Soluble	0.012	0.7409	0.0079	0.0027	0.0058	0.0557	0.0019	0.1543	0.0163	0.0024
PF3D7_1017100	rhoptry neck protein 12	Endoplasmic reticulum	Soluble	0.0045	0.0006	0.6268	0.053	0.2837	0.0257	0.0029	0.0027	0.0001	0.0001
PF3D7_1017300	golgi re-assembly stacking protein 1, golgi re-assembly stacking protein 2	Endoplasmic reticulum	Soluble	0.0033	0.0451	0.6535	0.004	0.1747	0.0872	0.0115	0.0194	0.0009	0.0004
PF3D7_1017800	conserved Plasmodium protein, unknown function	Cytoplasm	Soluble	0.0057	0.4179	0.1551	0.0034	0.0324	0.0299	0.125	0.2088	0.0211	0.0007
PF3D7_1017900	26S proteasome regulatory subunit p55, putative	Cytoplasm	Soluble	0.0038	0.6527	0.013	0.0001	0.0336	0.0356	0.0014	0.2585	0.0006	0.0007
PF3D7_1018000	tRNA pseudouridine synthase, putative	Extracellular	Soluble	0.0196	0.025	0.1104	0.5169	0.0067	0.0205	0.1891	0.1065	0.0014	0.0039
PF3D7_1018100	conserved Plasmodium protein, unknown function	Nucleus	Soluble	0.0026	0.2145	0.0175	0.0003	0.0209	0.0033	0.0041	0.7361	0.0007	0
PF3D7_1018300	peptidase, putative	Endoplasmic reticulum	Membrane	0.2498	0.0221	0.2919	0.0108	0.1923	0.174	0.0058	0.045	0.0082	0.0003
PF3D7_1019000	eukaryotic translation initiation factor subunit eIF2A, putative	Cytoplasm	Soluble	0.009	0.8621	0.0033	0.0006	0.0117	0.0374	0.0004	0.0739	0.0016	0.0001
PF3D7_1019300	zinc finger protein, putative	Cytoplasm	Soluble	0.0044	0.5398	0.0015	0.0009	0.0037	0.1122	0.0007	0.336	0.0005	0.0002
PF3D7_1019400	60S ribosomal protein L30e, putative	Cytoplasm	Soluble	0.0048	0.5112	0.001	0.0138	0.0009	0.003	0.0168	0.4437	0.0025	0.0023
PF3D7_1019500	conserved Plasmodium membrane protein, unknown function	Endoplasmic reticulum	Membrane	0.1864	0.0005	0.4425	0	0.1167	0.2502	0.0012	0.0019	0.0007	0
PF3D7_1020200	conserved Plasmodium protein, unknown function	Cytoplasm	Soluble	0.0038	0.556	0.0037	0	0.0312	0.0049	0.001	0.3991	0.0001	0.0001
PF3D7_1020300	cytoplasmic dynein intermediate chain, putative	Cytoplasm	Soluble	0.0058	0.6009	0.004	0.001	0.0105	0.0481	0.0012	0.3271	0.0011	0.0004
PF3D7_1020500	ribosomal silencing factor RsfS, putative	Cytoplasm	Soluble	0.0036	0.5655	0.0133	0.0039	0.0125	0.0387	0.0403	0.3176	0.0037	0.0009
PF3D7_1020700	N-acetyltransferase, GNAT family, putative	Nucleus	Soluble	0.0046	0.2136	0.0039	0.0002	0.0035	0.0034	0.001	0.7678	0.002	0.0001
PF3D7_1020800	dihydrolipoamide acyltransferase component E2	Endoplasmic reticulum	Soluble	0.0068	0.0633	0.4794	0.0864	0.0109	0.04	0.2538	0.0175	0.003	0.0389
PF3D7_1021000	conserved protein, unknown function	Endoplasmic reticulum	Membrane	0.0032	0.0166	0.4463	0.0082	0.1669	0.0097	0.3252	0.0153	0.0053	0.0033
PF3D7_1021200	conserved Plasmodium protein, unknown function	Nucleus	Soluble	0.0001	0.1288	0.0002	0	0.0002	0.0003	0.0001	0.8702	0	0
PF3D7_1021500	ATP-dependent RNA helicase ROK1, putative	Nucleus	Soluble	0.0022	0.2371	0.0023	0.0003	0.0018	0.0006	0.0005	0.7549	0.0003	0.0001
PF3D7_1021600	deoxyribose-phosphate aldolase, putative	Cytoplasm	Soluble	0.0129	0.6872	0.0085	0.0076	0.0021	0.011	0.0184	0.0768	0.0883	0.0872
PF3D7_1021700	conserved Plasmodium membrane protein, unknown function	Nucleus	Soluble	0.0309	0.2513	0.0373	0.0002	0.0371	0.0569	0.0033	0.5771	0.0057	0.0002
PF3D7_1021800	schizont egress antigen-1	Nucleus	Soluble	0	0.0935	0.0002	0	0.0021	0.0037	0	0.9004	0	0
PF3D7_1021900	PHAX domain-containing protein, putative	Cytoplasm	Soluble	0.0063	0.5096	0.0027	0.0011	0.005	0.0185	0.0004	0.455	0.0014	0.0001
PF3D7_1022000	RNA-binding protein, putative	Cytoplasm	Soluble	0.0103	0.8176	0.0056	0.0016	0.013	0.0554	0.0012	0.0921	0.003	0.0002
PF3D7_1022200	conserved Plasmodium membrane protein, unknown function	Endoplasmic reticulum	Membrane	0.0251	0.0001	0.5591	0	0.2918	0.1219	0.0011	0.0003	0.0006	0
PF3D7_1022300	ZIP domain-containing protein, putative	Lysosome/Vacuole	Membrane	0.0858	0.0007	0.2814	0.0008	0.1057	0.5218	0.002	0.0015	0.0002	0.0001
PF3D7_1022700	phospholipid scramblase, putative	Endoplasmic reticulum	Membrane	0.0638	0.1262	0.3456	0.0177	0.0778	0.0583	0.0551	0.2342	0.0194	0.002
PF3D7_1023100	dynein heavy chain, putative	Cytoplasm	Soluble	0.0017	0.6665	0.0082	0	0.0227	0.0313	0.0004	0.2687	0.0003	0
PF3D7_1023200	orotidine 5'-phosphate decarboxylase	Cytoplasm	Soluble	0.0349	0.4924	0.0492	0.009	0.0704	0.0712	0.0283	0.1983	0.043	0.0033
PF3D7_1023900	chromodomain-helicase-DNA-binding protein 1 homolog, putative	Nucleus	Soluble	0.0024	0.2435	0.0008	0	0.0097	0.0055	0.0002	0.737	0.0008	0.0001
PF3D7_1024000	conserved Plasmodium protein, unknown function	Endoplasmic reticulum	Soluble	0.0182	0.0794	0.3373	0.1793	0.0245	0.0485	0.231	0.076	0.0031	0.0026
PF3D7_1024300	ATP synthase-associated protein, putative	Mitochondrion	Soluble	0.0098	0.2719	0.0256	0.0336	0.018	0.0495	0.3508	0.2339	0.0043	0.0027
PF3D7_1024400	conserved Plasmodium protein, unknown function	Nucleus	Soluble	0.0045	0.2196	0.1992	0.0008	0.1221	0.0256	0.0121	0.4124	0.0031	0.0007
PF3D7_1024800	exported protein 3	Endoplasmic reticulum	Membrane	0.021	0.0037	0.4738	0.0033	0.3968	0.0305	0.0204	0.0454	0.0026	0.0024
PF3D7_1026500	conserved Plasmodium protein, unknown function	Endoplasmic reticulum	Membrane	0.1508	0.0171	0.2998	0.1459	0.2084	0.139	0.0275	0.0096	0.0018	0.0001
PF3D7_1026900	biotin--protein ligase 1	Cytoplasm	Soluble	0.0029	0.6338	0.0293	0.0021	0.0363	0.0973	0.0027	0.1941	0.0011	0.0004
PF3D7_1027000	conserved Plasmodium protein, unknown function	Cytoplasm	Soluble	0.0036	0.5447	0.0041	0.0006	0.012	0.0821	0.0008	0.3515	0.0005	0.0001
PF3D7_1027400	DNA-directed RNA polymerase II subunit RPB7, putative	Cytoplasm	Soluble	0.0109	0.3598	0.0655	0.0666	0.053	0.3159	0.0296	0.0918	0.0047	0.0022
PF3D7_1028000	methyltransferase, putative	Cytoplasm	Soluble	0.0058	0.4238	0.0416	0.0033	0.021	0.0184	0.1376	0.3422	0.004	0.0023
PF3D7_1028300	rRNA-processing protein EBP2, putative	Nucleus	Soluble	0	0.0028	0	0	0	0	0	0.9972	0	0
PF3D7_1028700	merozoite TRAP-like protein	Endoplasmic reticulum	Membrane	0.3185	0.0009	0.403	0.0029	0.17	0.0217	0.0403	0.0304	0.0051	0.0071
PF3D7_1028900	inner membrane complex protein 1m, putative	Nucleus	Soluble	0.1286	0.2721	0.0707	0.0096	0.0124	0.0679	0.0429	0.2943	0.0923	0.0091
PF3D7_1029400	LEM3/CDC50 family protein, putative	Endoplasmic reticulum	Membrane	0.2607	0.0011	0.4412	0.0001	0.2354	0.0453	0.004	0.0069	0.0052	0.0002
PF3D7_1029500	conserved Plasmodium protein, unknown function	Endoplasmic reticulum	Membrane	0.0492	0.0779	0.3507	0.0066	0.0417	0.003	0.2139	0.2337	0.021	0.0023
PF3D7_1030200	claudin-like apicomplexan microneme protein, putative	Cell membrane	Membrane	0.6226	0.0001	0.1837	0	0.1808	0.0105	0.0013	0.0007	0.0004	0
PF3D7_1030400	conserved protein, unknown function	Nucleus	Soluble	0.0018	0.3432	0.0071	0.001	0.0022	0.0076	0.0016	0.6344	0.0011	0.0001
PF3D7_1030500	26S proteasome regulatory subunit RPN9, putative	Cytoplasm	Soluble	0.0042	0.6381	0.0288	0.0002	0.038	0.0742	0.001	0.2143	0.0009	0.0003
PF3D7_1030700	RNA methyltransferase, putative	Cytoplasm	Soluble	0.0151	0.4531	0.021	0.0032	0.0042	0.0131	0.0108	0.3587	0.1171	0.0038
PF3D7_1030800	calmodulin, putative	Cytoplasm	Soluble	0.0023	0.4496	0.0344	0.0015	0.0346	0.0526	0.002	0.4211	0.0016	0.0003
PF3D7_1031500	DEAD/DEAH box helicase, putative	Cytoplasm	Soluble	0.0027	0.5314	0.0017	0.0004	0.0033	0.0052	0.0008	0.4525	0.002	0.0001
PF3D7_1031800	conserved protein, unknown function	Cytoplasm	Soluble	0.0013	0.5065	0.0069	0.0002	0.0088	0.0076	0.001	0.4673	0.0004	0
PF3D7_1032100	mRNA-decapping enzyme subunit 1, putative	Cytoplasm	Soluble	0.0218	0.5745	0.0143	0.0011	0.0582	0.1005	0.0031	0.2234	0.0028	0.0003
PF3D7_1032400	phosphatidylinositol N-acetylglucosaminyltransferase subunit A, putative	Endoplasmic reticulum	Membrane	0.0515	0.0438	0.5129	0.0004	0.1648	0.0323	0.0704	0.0533	0.0671	0.0034
PF3D7_1032900	RNA polymerase II-associated protein 1, putative	Cytoplasm	Soluble	0.0028	0.6166	0.0305	0.0011	0.0353	0.0867	0.0008	0.2255	0.0007	0
PF3D7_1033700	bromodomain protein 1	Cytoplasm	Soluble	0.0054	0.4787	0.0088	0.001	0.0202	0.0196	0.0041	0.4602	0.0009	0.0012
PF3D7_1033800	plasmepsin VII	Endoplasmic reticulum	Soluble	0.0076	0.0432	0.6299	0.148	0.0035	0.135	0.0178	0.0035	0.0075	0.004
PF3D7_1034100	conserved protein, unknown function	Extracellular	Soluble	0.0067	0.0447	0.1235	0.6523	0.0021	0.1265	0.0312	0.0106	0.0005	0.002
PF3D7_1034500	conserved Plasmodium protein, unknown function	Cytoplasm	Soluble	0.0046	0.3789	0.17	0.0003	0.109	0.0429	0.0044	0.2874	0.0025	0
PF3D7_1034700	ADP-ribosylation factor, putative	Golgi apparatus	Membrane	0.0093	0.0284	0.0663	0.0322	0.6896	0.0356	0.128	0.0052	0.0034	0.002
PF3D7_1034900	methionine--tRNA ligase	Cytoplasm	Soluble	0.0025	0.5777	0.0656	0.005	0.0384	0.0903	0.1287	0.0828	0.005	0.004
PF3D7_1035000	U2 snRNA/tRNA pseudouridine synthase, putative	Nucleus	Soluble	0.0009	0.1168	0.0054	0.0001	0.0073	0.0017	0.0036	0.8634	0.0007	0.0001
PF3D7_1035100	probable protein, unknown function	Endoplasmic reticulum	Soluble	0.0075	0.0015	0.7855	0.1187	0.0453	0.0223	0.0113	0.0078	0	0.0001
PF3D7_1035200	S-antigen	Endoplasmic reticulum	Soluble	0.0149	0.0004	0.4974	0.289	0.1409	0.0172	0.011	0.029	0	0
PF3D7_1035300	glutamate-rich protein GLURP	Endoplasmic reticulum	Soluble	0.0006	0.0004	0.4848	0.3226	0.18	0.0072	0.0027	0.0016	0	0
PF3D7_1035600	merozoite surface protein	Endoplasmic reticulum	Soluble	0.0105	0.0549	0.5327	0.0303	0.1165	0.0263	0.1123	0.1097	0.0021	0.0047
PF3D7_1035700	duffy binding-like merozoite surface protein	Endoplasmic reticulum	Soluble	0.0081	0.0433	0.6017	0.0234	0.1745	0.0289	0.0376	0.0815	0.0003	0.0007
PF3D7_1035800	probable protein, unknown function	Extracellular	Soluble	0.0021	0.0008	0.305	0.571	0.0008	0.1182	0.0014	0.0005	0	0.0002
PF3D7_1035900	probable protein, unknown function	Endoplasmic reticulum	Soluble	0.0003	0.005	0.684	0.2491	0.0371	0.0157	0.0043	0.0037	0	0.0007
PF3D7_1036000	merozoite surface protein 11	Endoplasmic reticulum	Soluble	0.0009	0.0006	0.5504	0.4004	0.0082	0.0353	0.0031	0.0011	0	0
PF3D7_1036300	duffy binding-like merozoite surface protein 2	Endoplasmic reticulum	Soluble	0.0167	0.0529	0.477	0.0822	0.1463	0.0399	0.0174	0.1662	0.0002	0.0012
PF3D7_1036400	liver stage antigen 1	Endoplasmic reticulum	Membrane	0.0111	0.0092	0.5669	0.0376	0.3343	0.0022	0.0174	0.0204	0	0.0008
PF3D7_1036500	conserved Plasmodium protein, unknown function	Nucleus	Soluble	0	0.013	0.0001	0.0001	0.0003	0.0007	0.0001	0.9857	0	0
PF3D7_1036600	conserved protein, unknown function, unspecified product	Mitochondrion	Membrane	0.0011	0.009	0.0004	0.0007	0.0004	0.0001	0.9729	0.0123	0.0028	0.0003
PF3D7_1036900	conserved Plasmodium protein, unknown function	Nucleus	Soluble	0.0089	0.4335	0.0019	0.0003	0.0101	0.0211	0.0003	0.5234	0.0004	0
PF3D7_1037000	DNA polymerase zeta catalytic subunit, putative	Nucleus	Soluble	0.0078	0.2972	0.0411	0.0006	0.0349	0.0153	0.0098	0.59	0.003	0.0003
PF3D7_1037100	pyruvate kinase 2	Endoplasmic reticulum	Soluble	0.0127	0.0539	0.4243	0.2766	0.0109	0.1827	0.0255	0.0101	0.0013	0.0022
PF3D7_1037200	conserved Plasmodium protein, unknown function	Nucleus	Soluble	0.0147	0.2975	0.1071	0.0007	0.1091	0.0239	0.0154	0.4299	0.0015	0.0001
PF3D7_1037600	TFIIH basal transcription factor complex helicase XPB subunit, putative	Nucleus	Soluble	0.0185	0.1518	0.0143	0.0018	0.0149	0.0055	0.0072	0.7773	0.0043	0.0045
PF3D7_1038400	gametocyte-specific protein	Nucleus	Soluble	0.0067	0.0956	0.0317	0	0.1419	0.1489	0.0029	0.5569	0	0.0153
PF3D7_1038500	Plasmodium exported protein, unknown function	Endoplasmic reticulum	Membrane	0.0451	0.015	0.4644	0.0018	0.2383	0.1826	0.0206	0.0134	0.0182	0.0006
PF3D7_1038600	Plasmodium exported protein, unknown function	Endoplasmic reticulum	Membrane	0.0244	0.0007	0.534	0	0.3632	0.0627	0.0122	0.0017	0.001	0.0001
PF3D7_1038900	esterase, putative	Endoplasmic reticulum	Soluble	0.0168	0.2216	0.2565	0.0256	0.0494	0.2197	0.0567	0.0248	0.1173	0.0116
PF3D7_1039700	Pfmc-2TM Maurer's cleft two transmembrane protein	Endoplasmic reticulum	Membrane	0.0064	0.0002	0.9346	0.0002	0.0432	0.0003	0.0121	0.0002	0.0027	0.0002
PF3D7_1039900	exported protein family 4	Endoplasmic reticulum	Membrane	0.2594	0.0001	0.6179	0.0001	0.1028	0.0076	0.0059	0.0027	0.0015	0.0022
PF3D7_1040000	rifin	Cell membrane	Membrane	0.9349	0	0.0567	0.0001	0.0046	0.0026	0.0003	0.0002	0.0001	0.0004
PF3D7_1040100	rifin	Cell membrane	Membrane	0.4554	0	0.4086	0.0004	0.0813	0.016	0.0225	0.0005	0.0016	0.0137
PF3D7_1040200	stevor	Cell membrane	Membrane	0.8428	0	0.1222	0.0001	0.0191	0.0102	0.0034	0.0003	0.0005	0.0014
PF3D7_1040300	rifin	Cell membrane	Membrane	0.7493	0.0001	0.161	0.0003	0.0046	0.0035	0.0431	0.0003	0.0034	0.0344
PF3D7_1040400	rifin	Cell membrane	Membrane	0.9242	0	0.0614	0.0002	0.0023	0.0012	0.0074	0.0001	0.0011	0.0022
PF3D7_1040500	rifin	Cell membrane	Membrane	0.9334	0.0001	0.0316	0.0003	0.001	0.0005	0.0076	0.0004	0.0091	0.0159
PF3D7_1040600	rifin	Cell membrane	Membrane	0.7138	0.0001	0.1764	0.0026	0.0519	0.0062	0.0348	0.0026	0.006	0.0056
PF3D7_1040700	rifin	Cell membrane	Membrane	0.8485	0.0002	0.0771	0.0006	0.0026	0.0033	0.0321	0.0017	0.0057	0.0282
PF3D7_1040900	rifin	Cell membrane	Membrane	0.9079	0	0.0745	0	0.0045	0.0028	0.0079	0	0.0003	0.002
PF3D7_1041000	rifin	Cell membrane	Membrane	0.963	0	0.0324	0	0.0023	0.0014	0.0007	0	0.0001	0
PF3D7_1041100	rifin	Cell membrane	Membrane	0.8816	0	0.109	0.0033	0.0037	0.0007	0.0015	0.0001	0.0001	0.0001
PF3D7_1041200	rifin	Cell membrane	Membrane	0.559	0.0001	0.3871	0.0001	0.0146	0.0176	0.0103	0.0009	0.008	0.0024
PF3D7_1041300	erythrocyte membrane protein 1, PfEMP1	Nucleus	Soluble	0.0891	0.34	0.0121	0.0003	0.0105	0.0064	0.0011	0.538	0.0022	0.0004
PF3D7_1100100	erythrocyte membrane protein 1, PfEMP1	Nucleus	Soluble	0.08	0.3078	0.0057	0.0004	0.0033	0.0055	0.0013	0.5893	0.0063	0.0005
PF3D7_1100200	erythrocyte membrane protein 1, PfEMP1	Nucleus	Soluble	0.0604	0.363	0.0101	0.0004	0.0089	0.0121	0.0011	0.5404	0.0033	0.0003
PF3D7_1100300	rifin	Cell membrane	Membrane	0.4011	0.002	0.1109	0.0007	0.0077	0.0084	0.3144	0.0024	0.0646	0.0877
PF3D7_1100400	rifin	Cell membrane	Membrane	0.8914	0	0.0889	0.0001	0.004	0.0041	0.0052	0.0002	0.0004	0.0057
PF3D7_1100500	rifin	Cell membrane	Membrane	0.7566	0	0.1996	0	0.0245	0.0122	0.0042	0.0004	0.0021	0.0003
PF3D7_1100800	Pfmc-2TM Maurer's cleft two transmembrane protein	Endoplasmic reticulum	Membrane	0.0549	0.0006	0.8168	0.0008	0.0774	0.0068	0.0276	0.0027	0.0076	0.0048
PF3D7_1101100	rifin	Cell membrane	Membrane	0.7422	0.0008	0.1266	0.0003	0.0087	0.0069	0.061	0.0018	0.0348	0.017
PF3D7_1101200	rifin	Cell membrane	Membrane	0.6113	0	0.3612	0	0.0237	0.0011	0.002	0	0.0001	0.0005
PF3D7_1101300	rifin	Cell membrane	Membrane	0.755	0	0.22	0.0001	0.0123	0.0023	0.0043	0.0004	0.0017	0.0039
PF3D7_1101500	exported protein family 4	Endoplasmic reticulum	Membrane	0.244	0.0001	0.6285	0.0001	0.1069	0.0084	0.0058	0.0027	0.0015	0.002
PF3D7_1101700	Pfmc-2TM Maurer's cleft two transmembrane protein	Endoplasmic reticulum	Membrane	0.0129	0.0003	0.8763	0.0003	0.0831	0.0009	0.0203	0.0005	0.005	0.0002
PF3D7_1102200	DnaJ protein, putative	Golgi apparatus	Membrane	0.0056	0.0335	0.3956	0.0006	0.4375	0.0348	0.0526	0.0365	0.0029	0.0006
PF3D7_1102400	phosphopantothenate--cysteine ligase, putative	Cytoplasm	Soluble	0.0139	0.38	0.058	0.0253	0.0464	0.171	0.0151	0.2825	0.0054	0.0025
PF3D7_1102500	Plasmodium exported protein (PHISTb), unknown function	Endoplasmic reticulum	Membrane	0.0019	0.0087	0.6326	0.0008	0.3301	0.0137	0.0052	0.0059	0.0005	0.0006
PF3D7_1102700	early transcribed membrane protein 11.1	Mitochondrion	Membrane	0.0789	0.0025	0.1232	0.379	0.0162	0.0111	0.3828	0.0007	0.0034	0.0021
PF3D7_1102800	early transcribed membrane protein 11.2	Mitochondrion	Membrane	0.1336	0.0054	0.1232	0.2118	0.0376	0.0054	0.4666	0.0008	0.0103	0.0052
PF3D7_1103000	conserved Plasmodium protein, unknown function	Cell membrane	Membrane	0.5269	0.0003	0.2693	0	0.1348	0.0532	0.0021	0.0126	0.0002	0.0004
PF3D7_1103100	60S acidic ribosomal protein P1, putative	Nucleus	Soluble	0.003	0.4393	0.0012	0.0013	0.0026	0.0069	0.0951	0.4409	0.0012	0.0085
PF3D7_1103500	CPW-WPC family protein	Extracellular	Soluble	0.0172	0.0551	0.0343	0.8161	0.0082	0.0223	0.0261	0.016	0.0018	0.0031
PF3D7_1103800	CCR4-NOT transcription complex subunit 1, putative	Cytoplasm	Soluble	0.0057	0.7986	0.0076	0.0003	0.0296	0.0377	0.0005	0.1196	0.0005	0
PF3D7_1104000	phenylalanine--tRNA ligase beta subunit	Cytoplasm	Soluble	0.0053	0.5121	0.0192	0.0004	0.0769	0.1405	0.001	0.2417	0.0005	0.0023
PF3D7_1104100	syntaxin, Qa-SNARE family	Golgi apparatus	Membrane	0.0091	0.0073	0.3642	0	0.4338	0.1613	0.0032	0.0203	0.0005	0.0002
PF3D7_1104200	chromatin remodeling protein	Nucleus	Soluble	0.0024	0.1678	0.0024	0	0.0043	0.0074	0.0007	0.8128	0.0019	0.0002
PF3D7_1104800	metabolite/drug transporter, putative	Endoplasmic reticulum	Membrane	0.0421	0	0.6734	0	0.2807	0.0029	0.0008	0	0.0001	0
PF3D7_1105200	WD repeat-containing protein WRAP73, putative	Nucleus	Soluble	0.063	0.2876	0.0746	0.0722	0.0621	0.1076	0.0131	0.3125	0.0065	0.0007
PF3D7_1105600	translocon component PTEX88	Endoplasmic reticulum	Soluble	0.0025	0.0168	0.3957	0.2982	0.0039	0.2773	0.0019	0.0034	0.0001	0.0001
PF3D7_1105900	conserved Plasmodium membrane protein, unknown function	Cell membrane	Membrane	0.3323	0	0.3307	0	0.313	0.024	0.0001	0	0	0
PF3D7_1106100	apicoplast ribosomal protein S15 precursor, putative	Extracellular	Soluble	0.0361	0.0119	0.324	0.3968	0.0798	0.0132	0.1233	0.0138	0.0009	0.0003
PF3D7_1106300	exonuclease, putative	Endoplasmic reticulum	Soluble	0.0128	0.0639	0.6609	0.0348	0.0401	0.0621	0.0649	0.0457	0.0071	0.0076
PF3D7_1106700	DNA replication ATP-dependent helicase/nuclease DNA2, putative	Nucleus	Soluble	0.0011	0.2074	0.0016	0.0001	0.0015	0.0009	0.0007	0.7863	0.0002	0.0002
PF3D7_1107400	DNA repair protein RAD51	Cytoplasm	Soluble	0.0307	0.6044	0.0142	0.003	0.0077	0.0136	0.0048	0.2842	0.0342	0.0033
PF3D7_1107500	prefoldin, putative	Cytoplasm	Soluble	0.0063	0.5817	0.0484	0.0034	0.0413	0.0613	0.019	0.2333	0.0029	0.0022
PF3D7_1107600	conserved Plasmodium protein, unknown function	Cytoplasm	Soluble	0.0016	0.4888	0.0042	0.0001	0.0221	0.0088	0.0009	0.4732	0.0002	0.0001
PF3D7_1107800	AP2 domain transcription factor, putative	Cytoplasm	Soluble	0.0048	0.5757	0.0018	0.0007	0.0058	0.0271	0.0009	0.3827	0.0003	0.0001
PF3D7_1107900	mechanosensitive ion channel protein, putative	Cell membrane	Membrane	0.4448	0.0048	0.2523	0.0002	0.0433	0.1418	0.008	0.0967	0.0077	0.0003
PF3D7_1108100	conserved Plasmodium protein, unknown function	Nucleus	Soluble	0.005	0.3257	0.0061	0.001	0.0127	0.0339	0.001	0.6132	0.0013	0.0001
PF3D7_1108600	endoplasmic reticulum-resident calcium binding protein	Endoplasmic reticulum	Soluble	0.0006	0.0008	0.9629	0.0033	0.0189	0.0088	0.0023	0.0022	0	0.0002
PF3D7_1109200	conserved Plasmodium protein, unknown function	Cytoplasm	Soluble	0.002	0.4905	0.0127	0.0001	0.035	0.012	0.0028	0.4445	0.0001	0.0002
PF3D7_1110200	pre-mRNA-processing factor 6, putative	Nucleus	Soluble	0.0005	0.2709	0.0009	0	0.0028	0.0009	0.0016	0.7214	0.0007	0.0003
PF3D7_1110400	RNA-binding protein, putative	Nucleus	Soluble	0.0006	0.0511	0.0005	0.0002	0.0005	0.0022	0	0.9448	0	0
PF3D7_1110700	actin-like protein, putative	Cytoplasm	Soluble	0.014	0.6982	0.0159	0.003	0.0291	0.1103	0.0023	0.0948	0.0299	0.0025
PF3D7_1111000	tRNA m5C-methyltransferase, putative	Cytoplasm	Soluble	0.0073	0.5488	0.0204	0.0348	0.0133	0.0561	0.0412	0.248	0.0291	0.001
PF3D7_1111300	protein transport protein BOS1, putative	Endoplasmic reticulum	Membrane	0.0066	0.0032	0.6532	0.0001	0.259	0.0103	0.0348	0.0121	0.0203	0.0004
PF3D7_1111400	conserved Plasmodium protein, unknown function	Cytoplasm	Soluble	0.001	0.5205	0.005	0.0004	0.0016	0.0024	0.0012	0.4673	0.0005	0
PF3D7_1111600	endonuclease/exonuclease/phosphatase family protein, putative	Cytoplasm	Soluble	0.0048	0.7103	0.0021	0.0018	0.0039	0.0133	0.0014	0.2596	0.0026	0.0002
PF3D7_1111800	peptidyl-prolyl cis-trans isomerase, putative	Endoplasmic reticulum	Membrane	0.0122	0.0113	0.5374	0.0003	0.3246	0.011	0.0134	0.0758	0.0139	0.0002
PF3D7_1111900	Josephin domain-containing protein, putative	Cytoplasm	Soluble	0.0026	0.4067	0.0464	0.0049	0.0103	0.0139	0.0989	0.4059	0.0101	0.0003
PF3D7_1112100	conserved Plasmodium protein, unknown function	Nucleus	Soluble	0.001	0.1243	0.0007	0	0.0012	0.0002	0.0001	0.8724	0.0001	0
PF3D7_1112400	nucleic acid binding protein, putative	Cytoplasm	Soluble	0.0008	0.4803	0.0087	0.0002	0.0097	0.0232	0.0022	0.4744	0.0004	0
PF3D7_1113000	conserved Plasmodium protein, unknown function	Cytoplasm	Soluble	0.0054	0.7143	0.0203	0.0002	0.0261	0.088	0.0012	0.1433	0.0011	0
PF3D7_1113700	glyoxalase I	Cytoplasm	Soluble	0.0049	0.5662	0.0392	0.0122	0.0186	0.2288	0.0173	0.1007	0.009	0.0031
PF3D7_1114500	conserved Plasmodium protein, unknown function	Endoplasmic reticulum	Membrane	0.0083	0.1538	0.541	0.004	0.09	0.0379	0.0604	0.0688	0.0353	0.0006
PF3D7_1114700	serine/threonine protein kinase, putative	Nucleus	Soluble	0.0012	0.226	0.0027	0.0001	0.0037	0.0018	0.0009	0.7623	0.0011	0.0002
PF3D7_1114900	conserved protein, unknown function	Cytoplasm	Soluble	0.0031	0.6634	0.006	0.0004	0.0097	0.032	0.0008	0.2836	0.001	0.0001
PF3D7_1115200	histone-lysine N-methyltransferase SET7	Nucleus	Soluble	0.0008	0.0604	0.0037	0.0001	0.0095	0.0048	0.0031	0.9171	0.0001	0.0003
PF3D7_1115300	cysteine proteinase falcipain 2b	Endoplasmic reticulum	Membrane	0.1103	0.0022	0.4646	0.0041	0.2835	0.1196	0.009	0.0019	0.003	0.0017
PF3D7_1115400	cysteine proteinase falcipain 3	Golgi apparatus	Membrane	0.0552	0.0003	0.2167	0.0004	0.518	0.2058	0.0009	0.0011	0.0011	0.0004
PF3D7_1115600	peptidyl-prolyl cis-trans isomerase	Endoplasmic reticulum	Soluble	0.0023	0.0127	0.7403	0.1741	0.0011	0.0559	0.0073	0.0008	0.0021	0.0033
PF3D7_1115700	cysteine proteinase falcipain 2a	Endoplasmic reticulum	Membrane	0.1045	0.0025	0.421	0.0055	0.3017	0.1416	0.012	0.0018	0.0062	0.0031
PF3D7_1116000	rhoptry neck protein 4	Endoplasmic reticulum	Soluble	0.0111	0.0199	0.5805	0.2241	0.0714	0.0591	0.0116	0.0216	0.0001	0.0008
PF3D7_1116800	heat shock protein 101	Endoplasmic reticulum	Membrane	0.0016	0.0024	0.5982	0.0056	0.336	0.0041	0.0491	0.0016	0.0011	0.0003
PF3D7_1117000	conserved Plasmodium membrane protein, unknown function	Lysosome/Vacuole	Membrane	0.1412	0.0012	0.3183	0.0002	0.0984	0.4335	0.0019	0.0045	0.0007	0
PF3D7_1117200	conserved Plasmodium protein, unknown function	Nucleus	Soluble	0.0045	0.2129	0.0024	0.0002	0.0009	0.0021	0.0003	0.7763	0.0004	0
PF3D7_1117800	DNA mismatch repair protein MLH	Nucleus	Soluble	0.007	0.4287	0.0057	0.0016	0.0076	0.0276	0.0034	0.51	0.0069	0.0014
PF3D7_1117900	conserved Plasmodium protein, unknown function	Cytoplasm	Soluble	0.0079	0.6672	0.0024	0.0013	0.0102	0.0185	0.0009	0.2901	0.0015	0.0001
PF3D7_1118100	AP-1 complex subunit sigma, putative	Cytoplasm	Soluble	0.0039	0.5186	0.0134	0.0036	0.0068	0.0054	0.2705	0.1725	0.0037	0.0016
PF3D7_1118200	heat shock protein 90, putative	Mitochondrion	Soluble	0.0034	0.1987	0.0036	0.0003	0.0199	0.005	0.5181	0.239	0.0071	0.0048
PF3D7_1118300	insulinase, putative	Cytoplasm	Soluble	0.0044	0.525	0.0092	0.0007	0.0205	0.0446	0.0006	0.394	0.0008	0.0001
PF3D7_1118800	actin-related protein 2/3 complex subunit 1, putative	Nucleus	Soluble	0.0296	0.331	0.0174	0.0155	0.0183	0.1824	0.0098	0.3847	0.0013	0.0102
PF3D7_1119400	ubiquitin-protein ligase, putative	Cytoplasm	Soluble	0.003	0.6108	0.0105	0.0005	0.0107	0.0375	0.0005	0.3254	0.001	0.0001
PF3D7_1119500	AP-4 complex subunit mu, putative	Cytoplasm	Soluble	0.0043	0.5337	0.0438	0.009	0.026	0.1053	0.0789	0.1198	0.0729	0.0064
PF3D7_1119700	conserved Plasmodium protein, unknown function	Nucleus	Soluble	0.0157	0.2828	0.0104	0.0039	0.0156	0.0273	0.0234	0.6063	0.0143	0.0004
PF3D7_1119900	protein transport protein SEC16, putative	Cytoplasm	Soluble	0.0024	0.5149	0.0037	0.0005	0.0052	0.0553	0.0007	0.4166	0.0006	0
PF3D7_1120300	CorA-like Mg2+ transporter protein, putative	Endoplasmic reticulum	Membrane	0.0027	0.0092	0.5035	0.0001	0.0579	0.0031	0.382	0.005	0.0357	0.001
PF3D7_1120400	alpha/beta hydrolase fold domain containing protein, putative	Cytoplasm	Soluble	0.0256	0.4222	0.1244	0.0093	0.0331	0.0684	0.0313	0.2142	0.0526	0.019
PF3D7_1120700	conserved Plasmodium protein, unknown function	Nucleus	Soluble	0.0015	0.3336	0.0009	0.0001	0.0018	0.003	0.0015	0.6571	0.0004	0
PF3D7_1120800	conserved Plasmodium protein, unknown function	Mitochondrion	Membrane	0.011	0.0032	0.255	0.0026	0.1434	0.0023	0.5489	0.0021	0.0286	0.003
PF3D7_1121200	conserved protein, unknown function	Cytoplasm	Soluble	0.0103	0.4703	0.0157	0.0143	0.0126	0.0154	0.2948	0.1613	0.0048	0.0005
PF3D7_1121600	exported protein 1	Cell membrane	Membrane	0.4465	0.0002	0.1745	0.1717	0.0178	0.0847	0.0873	0.0026	0.0003	0.0144
PF3D7_1121700	protein GCN20	Cytoplasm	Soluble	0.0062	0.5799	0.0459	0.0008	0.0706	0.1016	0.0084	0.1793	0.0022	0.0052
PF3D7_1121800	peptidase M16, putative	Golgi apparatus	Membrane	0.0077	0.0742	0.3394	0.0051	0.4385	0.0886	0.0266	0.0185	0.0012	0.0002
PF3D7_1122000	conserved protein, unknown function	Mitochondrion	Soluble	0.0016	0.2461	0.0829	0.0045	0.0465	0.0559	0.5061	0.0483	0.0074	0.0006
PF3D7_1122500	conserved Plasmodium protein, unknown function	Cytoplasm	Soluble	0.0062	0.7959	0.003	0.0005	0.0122	0.0372	0.0008	0.142	0.002	0.0002
PF3D7_1122600	conserved Plasmodium protein, unknown function	Cytoplasm	Soluble	0.0057	0.5011	0.0166	0.0004	0.0155	0.069	0.005	0.3793	0.0011	0.0063
PF3D7_1122800	calcium-dependent protein kinase 6	Nucleus	Soluble	0.0019	0.3319	0.0049	0.0003	0.0102	0.0271	0.0018	0.6202	0.0015	0.0003
PF3D7_1122900	dynein heavy chain, putative	Cytoplasm	Soluble	0.0024	0.5913	0.0036	0.0001	0.0131	0.0184	0.0002	0.3705	0.0003	0
PF3D7_1123000	conserved Plasmodium protein, unknown function	Nucleus	Soluble	0.0008	0.0788	0.0001	0.0001	0.0001	0.0005	0	0.9196	0.0001	0
PF3D7_1123200	leucine-rich repeat protein	Cytoplasm	Soluble	0.0024	0.6595	0.0009	0.0004	0.0017	0.0068	0.001	0.3265	0.0005	0.0001
PF3D7_1123400	translation elongation factor EF-1, subunit alpha, putative	Cytoplasm	Soluble	0.002	0.6666	0.0021	0.0007	0.0021	0.0177	0.0012	0.2951	0.0094	0.0031
PF3D7_1123500	golgi protein 2	Endoplasmic reticulum	Membrane	0.1042	0.0137	0.6389	0.0005	0.1446	0.0475	0.0037	0.045	0.0019	0.0001
PF3D7_1124000	endoplasmic reticulum oxidoreductin, putative	Endoplasmic reticulum	Membrane	0.0885	0.0007	0.8392	0	0.0561	0.0069	0.0033	0.0031	0.0019	0.0002
PF3D7_1124100	BEACH domain-containing protein, putative	Nucleus	Soluble	0.0019	0.3351	0.001	0.0002	0.0017	0.0095	0.0006	0.6495	0.0005	0.0001
PF3D7_1124300	conserved protein, unknown function	Nucleus	Soluble	0.0006	0.2331	0.0034	0.0001	0.0056	0.0016	0.0011	0.7541	0.0003	0.0001
PF3D7_1124400	U6 snRNA-associated Sm-like protein LSm1, putative	Cytoplasm	Soluble	0.0008	0.4803	0.0124	0.0026	0.0082	0.0569	0.0075	0.4288	0.0006	0.0019
PF3D7_1124500	pyruvate dehydrogenase E1 component subunit alpha	Endoplasmic reticulum	Soluble	0.0245	0.0332	0.651	0.1222	0.0087	0.0401	0.0882	0.0169	0.0024	0.0129
PF3D7_1124600	ethanolamine kinase	Cytoplasm	Soluble	0.0157	0.4951	0.0871	0.0014	0.0533	0.0673	0.0071	0.2672	0.0032	0.0026
PF3D7_1124700	GrpE protein homolog, mitochondrial, putative	Mitochondrion	Membrane	0	0.016	0	0	0	0	0.9608	0.0216	0.0016	0
PF3D7_1125300	DNA-directed RNA polymerase	Nucleus	Soluble	0.0053	0.2833	0.0045	0.0027	0.0075	0.0055	0.2434	0.4408	0.0065	0.0005
PF3D7_1125400	mitochondrial import inner membrane translocase subunit TIM44, putative	Mitochondrion	Soluble	0.0001	0.0188	0.0002	0.0001	0.0002	0	0.9439	0.0355	0.0011	0.0001
PF3D7_1125700	kelch domain-containing protein, putative	Cytoplasm	Soluble	0.0017	0.4423	0.0209	0.0011	0.0272	0.0266	0.0246	0.4421	0.0118	0.0015
PF3D7_1125800	kelch domain-containing protein, putative	Cytoplasm	Soluble	0.0147	0.669	0.0148	0.004	0.0283	0.0782	0.0036	0.1752	0.0096	0.0027
PF3D7_1126000	threonine--tRNA ligase	Nucleus	Soluble	0.0067	0.1872	0.1557	0.0505	0.0166	0.0112	0.2419	0.3262	0.0026	0.0014
PF3D7_1126100	autophagy-related protein 7, putative	Cytoplasm	Soluble	0.003	0.5553	0.005	0.0006	0.0064	0.0176	0.0014	0.4095	0.001	0.0001
PF3D7_1126300	DnaJ protein, putative	Nucleus	Soluble	0.0019	0.3193	0.0022	0.0003	0.0031	0.0026	0.0007	0.6693	0.0006	0
PF3D7_1126400	mediator of RNA polymerase II transcription subunit 21, putative	Nucleus	Soluble	0.0177	0.3426	0.0512	0.0057	0.0769	0.1006	0.0511	0.3449	0.0035	0.0059
PF3D7_1126500	WD repeat-containing protein, putative	Nucleus	Soluble	0.0035	0.4386	0.0096	0.0021	0.0043	0.058	0.0025	0.4789	0.0022	0.0003
PF3D7_1127000	protein phosphatase, putative	Endoplasmic reticulum	Membrane	0.0278	0.0101	0.5408	0.0003	0.3156	0.071	0.0142	0.0166	0.0034	0.0003
PF3D7_1127300	tRNA (guanine-N(7)-)-methyltransferase, putative	Nucleus	Soluble	0.0049	0.1529	0.1868	0.0004	0.0227	0.0021	0.0033	0.6222	0.0047	0
PF3D7_1127400	conserved Plasmodium protein, unknown function	Extracellular	Soluble	0.0088	0.093	0.1821	0.3039	0.1082	0.0246	0.2579	0.0156	0.0058	0.0001
PF3D7_1127600	CRAL/TRIO domain-containing protein, putative	Cytoplasm	Soluble	0.0139	0.5166	0.1125	0.0015	0.0553	0.0531	0.0262	0.1719	0.0461	0.0029
PF3D7_1127700	conserved Plasmodium protein, unknown function	Endoplasmic reticulum	Membrane	0.0047	0.0673	0.3555	0.0019	0.3242	0.0561	0.0489	0.1175	0.0229	0.001
PF3D7_1127900	conserved Plasmodium protein, unknown function	Nucleus	Soluble	0.0081	0.3513	0.012	0.0009	0.0453	0.1419	0.0035	0.4358	0.0005	0.0007
PF3D7_1128100	prefoldin subunit 5, putative	Nucleus	Soluble	0.0098	0.2658	0.0207	0.0012	0.0202	0.0162	0.0229	0.64	0.0026	0.0006
PF3D7_1128300	ATP-dependent 6-phosphofructokinase	Nucleus	Soluble	0.002	0.4088	0.0028	0.0001	0.0049	0.0026	0.0005	0.5777	0.0005	0.0001
PF3D7_1128500	Fe-S cluster assembly protein, putative	Nucleus	Soluble	0.0081	0.3968	0.0121	0.0018	0.0089	0.0307	0.0027	0.535	0.0026	0.0013
PF3D7_1129000	spermidine synthase	Endoplasmic reticulum	Membrane	0.0108	0.0192	0.5606	0.0082	0.2349	0.0361	0.1081	0.0073	0.0104	0.0043
PF3D7_1129100	parasitophorous vacuolar protein 1	Endoplasmic reticulum	Soluble	0.0049	0.022	0.5557	0.2377	0.0291	0.1129	0.0146	0.0224	0.0001	0.0006
PF3D7_1129200	26S proteasome regulatory subunit RPN7, putative	Cytoplasm	Soluble	0.0055	0.6802	0.032	0.0015	0.0224	0.0526	0.0028	0.1985	0.004	0.0004
PF3D7_1129500	A/G-specific adenine glycosylase, putative	Nucleus	Soluble	0.001	0.1248	0.0006	0.0002	0.0005	0.0004	0.0003	0.8717	0.0003	0
PF3D7_1129600	phosphatidylinositol-4-phosphate 5-kinase, putative	Cytoplasm	Soluble	0.0115	0.5722	0.0088	0.002	0.0071	0.0386	0.0012	0.3531	0.0052	0.0001
PF3D7_1129700	conserved Plasmodium protein, unknown function	Cytoplasm	Soluble	0.0038	0.5253	0.063	0.0026	0.0126	0.0094	0.0839	0.26	0.0391	0.0003
PF3D7_1129800	conserved Plasmodium protein, unknown function	Cytoplasm	Soluble	0.0066	0.3165	0.1922	0.0097	0.0896	0.1649	0.009	0.2062	0.0046	0.0008
PF3D7_1130200	60S ribosomal protein P0	Cytoplasm	Soluble	0.0093	0.6985	0.0021	0.0007	0.0022	0.0064	0.0095	0.2434	0.023	0.0049
PF3D7_1130400	26S protease regulatory subunit 6A, putative	Cytoplasm	Soluble	0.0058	0.7446	0.0057	0.0011	0.0125	0.0689	0.0026	0.1412	0.0137	0.0038
PF3D7_1131200	conserved Plasmodium protein, unknown function	Nucleus	Soluble	0.0003	0.0742	0.0004	0	0.0004	0.0001	0.0004	0.9238	0.0003	0
PF3D7_1131600	kelch domain-containing protein, putative	Cytoplasm	Soluble	0.0065	0.6872	0.0054	0.0026	0.0065	0.1448	0.0006	0.1452	0.0011	0.0002
PF3D7_1131800	oxysterol-binding protein, putative	Nucleus	Soluble	0.003	0.3762	0.0024	0.0003	0.0043	0.0897	0.0006	0.5225	0.0008	0.0001
PF3D7_1132300	nucleic acid binding protein, putative	Cytoplasm	Soluble	0.0078	0.5838	0.0353	0.003	0.0171	0.2466	0.0012	0.1003	0.0024	0.0024
PF3D7_1132900	glycine cleavage system H protein	Mitochondrion	Soluble	0.0009	0.2074	0.0149	0.0017	0.0074	0.0044	0.6483	0.1107	0.0024	0.0019
PF3D7_1133200	conserved Plasmodium protein, unknown function	Nucleus	Soluble	0.0002	0.0776	0.0001	0	0.0031	0.0003	0	0.9187	0	0
PF3D7_1133400	apical membrane antigen 1	Cell membrane	Membrane	0.9621	0	0.0284	0	0.0067	0.0022	0.0006	0	0	0
PF3D7_1133500	conserved Plasmodium protein, unknown function	Cytoplasm	Soluble	0.0079	0.3114	0.2273	0.0374	0.0203	0.0437	0.2449	0.0434	0.0629	0.0008
PF3D7_1133700	FHA domain-containing protein, putative	Nucleus	Soluble	0.0001	0.0065	0.0002	0	0	0	0	0.9931	0	0
PF3D7_1133800	RNA (uracil-5-)methyltransferase, putative	Endoplasmic reticulum	Soluble	0.0376	0.0597	0.4549	0.0801	0.0393	0.0296	0.13	0.1616	0.002	0.0053
PF3D7_1133900	conserved Plasmodium protein, unknown function	Nucleus	Soluble	0.0028	0.1656	0.3407	0.0129	0.0372	0.0291	0.0016	0.4099	0.0002	0.0001
PF3D7_1134000	heat shock protein 70	Mitochondrion	Soluble	0.017	0.2165	0.0213	0.005	0.0116	0.0157	0.6251	0.0168	0.0493	0.0216
PF3D7_1134200	conserved Plasmodium protein, unknown function	Nucleus	Soluble	0.002	0.2385	0.0041	0	0.0039	0.0012	0.0006	0.7489	0.0008	0
PF3D7_1134300	conserved Plasmodium protein, unknown function	Nucleus	Soluble	0.0066	0.4052	0.0041	0.0003	0.0103	0.0193	0.0004	0.5531	0.0005	0
PF3D7_1134500	alpha/beta hydrolase, putative	Cytoplasm	Soluble	0.0058	0.5202	0.03	0.0008	0.0087	0.0085	0.0342	0.3622	0.0291	0.0004
PF3D7_1134700	DNA-directed RNA polymerase I subunit RPA2, putative	Cytoplasm	Soluble	0.0102	0.5924	0.0061	0.0011	0.0074	0.0205	0.0043	0.3439	0.0135	0.0006
PF3D7_1135100	protein phosphatase PPM8, putative	Endoplasmic reticulum	Soluble	0.0114	0.1067	0.3726	0.0581	0.1091	0.0412	0.2102	0.0638	0.0251	0.0017
PF3D7_1135400	conserved Plasmodium protein, unknown function	Endoplasmic reticulum	Soluble	0.0061	0.036	0.78	0.0451	0.036	0.0646	0.0232	0.0059	0.0008	0.0024
PF3D7_1136100	conserved Plasmodium protein, unknown function	Endoplasmic reticulum	Soluble	0.0042	0.1378	0.4398	0.1227	0.0296	0.182	0.0482	0.0339	0.0003	0.0015
PF3D7_1136200	conserved Plasmodium protein, unknown function	Golgi apparatus	Membrane	0.1048	0.0174	0.1662	0.0024	0.3211	0.0971	0.0272	0.2612	0.0014	0.0013
PF3D7_1136300	tudor staphylococcal nuclease	Nucleus	Soluble	0.0054	0.39	0.0133	0.0006	0.0247	0.0174	0.0048	0.5406	0.0025	0.0006
PF3D7_1136500	casein kinase 1	Cytoplasm	Soluble	0.003	0.5726	0.031	0.0012	0.0016	0.0024	0.0687	0.0629	0.249	0.0075
PF3D7_1136600	conserved Plasmodium protein, unknown function	Nucleus	Soluble	0.0002	0.1818	0.0012	0	0.005	0.0015	0.0002	0.81	0	0
PF3D7_1136700	conserved Plasmodium protein, unknown function	Nucleus	Soluble	0.0012	0.1978	0.0041	0.0005	0.0038	0.0044	0.0086	0.7745	0.0035	0.0017
PF3D7_1136900	subtilisin-like protease 2	Endoplasmic reticulum	Membrane	0.1561	0.0127	0.6064	0.0087	0.0808	0.0379	0.0376	0.0423	0.0058	0.0116
PF3D7_1137100	mitochondrial ribosomal protein S9 precursor, putative	Mitochondrion	Soluble	0.0011	0.0922	0.0042	0.0033	0.0043	0.0016	0.71	0.174	0.0086	0.0006
PF3D7_1137300	CLPTM1 domain-containing protein, putative	Endoplasmic reticulum	Membrane	0.1638	0.0007	0.3734	0	0.1878	0.2677	0.0034	0.0018	0.0011	0.0001
PF3D7_1137600	conserved Plasmodium protein, unknown function	Nucleus	Soluble	0.012	0.2609	0.0099	0.0031	0.049	0.0534	0.0048	0.6065	0.0003	0.0001
PF3D7_1137900	conserved Plasmodium protein, unknown function	Cytoplasm	Soluble	0.0135	0.6033	0.0446	0.0008	0.0412	0.068	0.0133	0.2129	0.002	0.0004
PF3D7_1138000	conserved Plasmodium protein, unknown function	Cytoplasm	Soluble	0.0092	0.6995	0.0097	0.0005	0.0384	0.0984	0.0014	0.1421	0.0007	0.0002
PF3D7_1138100	ubiquitin-related modifier 1, putative	Cytoplasm	Soluble	0.0007	0.7755	0.0034	0.003	0.0013	0.0144	0.0089	0.1887	0.0013	0.0028
PF3D7_1138400	guanylyl cyclase	Cell membrane	Membrane	0.3822	0.0059	0.3075	0.0002	0.0942	0.1318	0.0128	0.0592	0.0056	0.0006
PF3D7_1138800	WD repeat-containing protein, putative	Cytoplasm	Soluble	0.0101	0.7231	0.0177	0.0007	0.0368	0.0904	0.0013	0.1179	0.0018	0.0002
PF3D7_1139100	RNA-binding protein, putative	Cytoplasm	Soluble	0.0154	0.5244	0.0134	0.0033	0.0209	0.3133	0.0012	0.106	0.0018	0.0003
PF3D7_1139200	VPS9 domain-containing protein, putative	Cytoplasm	Soluble	0.0021	0.4981	0.0897	0.0121	0.0409	0.2316	0.0633	0.0575	0.0039	0.0007
PF3D7_1139300	AP2 domain transcription factor, putative	Nucleus	Soluble	0.0044	0.444	0.0031	0.0001	0.0236	0.0309	0.0006	0.4927	0.0005	0
PF3D7_1139500	AAA family ATPase, putative, unspecified product	Nucleus	Soluble	0.0007	0.1491	0.0013	0.0002	0.0013	0.0019	0.0013	0.8429	0.0011	0.0002
PF3D7_1140000	carbonic anhydrase	Endoplasmic reticulum	Membrane	0.0257	0.0069	0.8363	0.013	0.0499	0.0087	0.0424	0.0118	0.0045	0.0008
PF3D7_1140100	V-type proton ATPase subunit F, putative	Cytoplasm	Soluble	0.013	0.4875	0.027	0.0071	0.0391	0.0591	0.0174	0.3431	0.0052	0.0014
PF3D7_1140500	myosin K, putative	Nucleus	Soluble	0.0008	0.1693	0.0003	0	0.0006	0.0002	0.0002	0.8284	0.0003	0
PF3D7_1140900	conserved Plasmodium protein, unknown function	Cytoplasm	Soluble	0.0067	0.3666	0.2152	0.0003	0.1655	0.0938	0.0054	0.1427	0.0038	0
PF3D7_1141200	ATP synthase-associated protein, putative	Mitochondrion	Membrane	0.0047	0.0099	0.1115	0.0046	0.0032	0.0003	0.7936	0.0008	0.0714	0.0001
PF3D7_1141400	phosphatidylinositol N-acetylglucosaminyltransferase subunit H, putative	Endoplasmic reticulum	Membrane	0.0186	0.0448	0.4389	0.0002	0.1525	0.158	0.0043	0.177	0.0053	0.0004
PF3D7_1141900	inner membrane complex protein 1b, putative	Cytoplasm	Soluble	0.0047	0.6537	0.0082	0.0005	0.0178	0.0232	0.0029	0.2866	0.0016	0.0009
PF3D7_1142800	ATP synthase-associated protein, putative	Nucleus	Soluble	0.0225	0.1271	0.0125	0.0327	0.0145	0.01	0.1578	0.6201	0.0022	0.0007
PF3D7_1142900	conserved Plasmodium protein, unknown function	Nucleus	Soluble	0.0024	0.4464	0.0047	0.0005	0.0036	0.0021	0.0451	0.4763	0.0185	0.0004
PF3D7_1143000	alpha/beta hydrolase, putative	Extracellular	Soluble	0.0052	0.0409	0.2559	0.439	0.0033	0.1277	0.1068	0.0131	0.0005	0.0075
PF3D7_1143100	AP2 domain transcription factor AP2-O, putative	Nucleus	Soluble	0.0025	0.3959	0.0044	0.0007	0.0093	0.053	0.0021	0.5314	0.0005	0.0002
PF3D7_1143300	DNA-directed RNA polymerases I and III subunit RPAC1, putative	Cytoplasm	Soluble	0.0047	0.6606	0.0103	0.0022	0.0062	0.0233	0.0029	0.2869	0.0023	0.0008
PF3D7_1143900	ATP-dependent (S)-NAD(P)H-hydrate dehydratase, putative	Cytoplasm	Soluble	0.0364	0.3438	0.1044	0.0016	0.0314	0.0577	0.0209	0.1444	0.2512	0.0082
PF3D7_1144200	conserved Plasmodium protein, unknown function	Nucleus	Soluble	0.0015	0.1444	0.0019	0.0001	0.0038	0.0033	0.0004	0.8444	0.0002	0.0001
PF3D7_1144500	SUMO-activating enzyme subunit 1	Cytoplasm	Soluble	0.0185	0.6176	0.0198	0.0052	0.0914	0.0668	0.0023	0.1763	0.0016	0.0005
PF3D7_1144600	transcription initiation factor IIF subunit beta, putative	Nucleus	Soluble	0.0021	0.1991	0.0043	0.0009	0.0021	0.0014	0.0153	0.7642	0.0092	0.0014
PF3D7_1145200	serine/threonine protein kinase, putative	Nucleus	Soluble	0.0049	0.3692	0.0013	0.0002	0.0052	0.0182	0.0002	0.6001	0.0006	0
PF3D7_1145400	dynamin-like protein	Cytoplasm	Soluble	0.0116	0.842	0.0047	0.0005	0.0254	0.0335	0.0009	0.079	0.0021	0.0003
PF3D7_1145500	ABC transporter B family member 3, putative	Endoplasmic reticulum	Membrane	0.0474	0.0016	0.7523	0.0359	0.0487	0.09	0.017	0.0023	0.0045	0.0002
PF3D7_1145900	conserved Plasmodium protein, unknown function	Nucleus	Soluble	0.001	0.0702	0.0206	0.001	0.013	0.0033	0.0337	0.8554	0.0004	0.0013
PF3D7_1146000	ribosome assembly protein 4, putative	Nucleus	Soluble	0.0005	0.246	0.0006	0	0.0021	0.0105	0.0002	0.7399	0.0003	0
PF3D7_1146500	leucine-rich repeat protein	Nucleus	Soluble	0.0011	0.4342	0.0128	0.0005	0.014	0.0108	0.0038	0.519	0.0036	0.0002
PF3D7_1146700	kinesin-like protein, putative	Nucleus	Soluble	0.0041	0.4445	0.0059	0.0005	0.0061	0.011	0.0086	0.5138	0.0051	0.0004
PF3D7_1146800	conserved Plasmodium protein, unknown function	Cytoplasm	Soluble	0.002	0.6047	0.0019	0.0008	0.0053	0.0481	0.0005	0.3361	0.0005	0
PF3D7_1147200	tubulin--tyrosine ligase, putative	Cytoplasm	Soluble	0.0077	0.5876	0.0018	0.0005	0.0025	0.06	0.0007	0.3373	0.0017	0.0001
PF3D7_1147800	membrane associated erythrocyte binding-like protein	Endoplasmic reticulum	Membrane	0.2032	0.112	0.3211	0.0166	0.1643	0.0523	0.0096	0.1174	0.0024	0.0011
PF3D7_1148900	Plasmodium exported protein, unknown function	Endoplasmic reticulum	Membrane	0.0275	0.0003	0.9012	0	0.0211	0.0008	0.0343	0.0003	0.0145	0
PF3D7_1149000	antigen 332, DBL-like protein	Nucleus	Soluble	0.0013	0.0907	0.0259	0.0001	0.3465	0.0084	0.0002	0.5236	0	0.0031
PF3D7_1149100	Plasmodium exported protein, unknown function	Nucleus	Soluble	0.0321	0.043	0.034	0.0109	0.069	0.0071	0.038	0.765	0.0002	0.0007
PF3D7_1149200	ring-infected erythrocyte surface antigen	Nucleus	Soluble	0.0018	0.1449	0.0172	0.0005	0.0251	0.0044	0.0047	0.7997	0.0016	0.0004
PF3D7_1149500	ring-infected erythrocyte surface antigen 2, pseudogene	Endoplasmic reticulum	Membrane	0.0048	0.1032	0.3191	0.0006	0.1688	0.0073	0.2367	0.1378	0.0201	0.0015
PF3D7_1149900	stevor	Cell membrane	Membrane	0.7318	0	0.1864	0.0003	0.0333	0.0391	0.0071	0.0003	0.001	0.0007
PF3D7_1150000	rifin	Cell membrane	Membrane	0.9716	0	0.0244	0.0001	0.0021	0.001	0.0006	0	0.0001	0.0001
PF3D7_1150200	rifin	Cell membrane	Membrane	0.564	0.0001	0.4063	0.0001	0.0162	0.0019	0.0061	0.0003	0.0027	0.0023
PF3D7_1150300	rifin	Cell membrane	Membrane	0.4548	0.0052	0.1956	0.0008	0.019	0.027	0.2018	0.0054	0.0771	0.0132
PF3D7_1150400	erythrocyte membrane protein 1, PfEMP1	Nucleus	Soluble	0.1063	0.3049	0.03	0.0005	0.015	0.0488	0.0011	0.4902	0.0029	0.0002
PF3D7_1200100	erythrocyte membrane protein 1, PfEMP1	Nucleus	Soluble	0.0533	0.1966	0.0159	0.0003	0.0056	0.0139	0.002	0.7051	0.0067	0.0005
PF3D7_1200200	rifin	Cell membrane	Membrane	0.9028	0.0001	0.0763	0.0004	0.0021	0.0009	0.0079	0.0003	0.0049	0.0043
PF3D7_1200300	rifin	Cell membrane	Membrane	0.939	0	0.0533	0	0.0038	0.0007	0.0023	0	0.0002	0.0005
PF3D7_1200400	erythrocyte membrane protein 1, PfEMP1	Cytoplasm	Soluble	0.0173	0.5165	0.0022	0.0005	0.0035	0.0053	0.0008	0.4524	0.0013	0.0003
PF3D7_1200500	rifin	Cell membrane	Membrane	0.9883	0	0.0107	0	0.0005	0.0002	0.0002	0	0	0
PF3D7_1200600	erythrocyte membrane protein 1, PfEMP1	Cytoplasm	Soluble	0.046	0.522	0.0053	0.0015	0.003	0.0471	0.0009	0.3711	0.0029	0.0002
PF3D7_1200800	serine/threonine protein kinase, FIKK family	Endoplasmic reticulum	Membrane	0.004	0.001	0.8237	0.001	0.1588	0.0036	0.0068	0.0008	0.0002	0.0001
PF3D7_1201200	Plasmodium exported protein (PHISTa-like), unknown function	Golgi apparatus	Membrane	0.0421	0.0046	0.1894	0.0022	0.6117	0.0301	0.0864	0.0141	0.0028	0.0166
PF3D7_1201300	liver stage associated protein 1	Endoplasmic reticulum	Membrane	0.182	0.001	0.3306	0.246	0.0273	0.2015	0.007	0.0021	0.0006	0.0019
PF3D7_1201400	Plasmodium exported protein, unknown function	Nucleus	Membrane	0.0043	0.07	0.3608	0.001	0.1464	0.0312	0.004	0.3811	0.0004	0.0007
PF3D7_1202200	mitochondrial phosphate carrier protein	Mitochondrion	Membrane	0.001	0.0012	0.0488	0.0001	0.0006	0.0001	0.784	0.0002	0.1628	0.0013
PF3D7_1202300	dynein heavy chain, putative	Cytoplasm	Soluble	0.0033	0.6709	0.012	0.0001	0.0129	0.0227	0.0003	0.2773	0.0005	0
PF3D7_1202600	conserved protein, unknown function	Nucleus	Soluble	0.0002	0.0304	0.0004	0	0.0008	0.0001	0.0001	0.9679	0	0
PF3D7_1203700	nucleosome assembly protein	Nucleus	Soluble	0.0009	0.3041	0.0033	0.0001	0.0088	0.0086	0.0014	0.6721	0.0004	0.0002
PF3D7_1203900	ubiquitin-conjugating enzyme E2	Cytoplasm	Soluble	0.0142	0.4777	0.0076	0.0379	0.008	0.0115	0.1254	0.2951	0.0183	0.0042
PF3D7_1204300	eukaryotic translation initiation factor 5A	Cytoplasm	Soluble	0.0022	0.7706	0.0016	0.0017	0.0019	0.0418	0.0053	0.1364	0.0034	0.0351
PF3D7_1205100	O-phosphoseryl-tRNA(Sec) selenium transferase, putative	Cytoplasm	Soluble	0.0203	0.5195	0.0933	0.0039	0.0315	0.0565	0.0136	0.2364	0.019	0.006
PF3D7_1205400	kelch domain-containing protein, putative	Nucleus	Soluble	0.02	0.3276	0.0187	0.0097	0.0178	0.1185	0.0432	0.4302	0.0114	0.0029
PF3D7_1205500	zinc finger protein, putative	Cytoplasm	Soluble	0.0033	0.5102	0.0012	0.0007	0.0018	0.0207	0.0005	0.4604	0.0011	0.0001
PF3D7_1205800	high mobility group protein B3, putative	Nucleus	Soluble	0.0035	0.3825	0.0018	0.0001	0.0054	0.0172	0.0007	0.5881	0.0007	0
PF3D7_1206000	shewanella-like protein phosphatase 2	Endoplasmic reticulum	Soluble	0.0044	0.0293	0.6579	0.0808	0.0457	0.1689	0.0052	0.0061	0.0012	0.0005
PF3D7_1206100	IMP-specific 5'-nucleotidase, putative	Cytoplasm	Soluble	0.0116	0.4955	0.0302	0.0119	0.0354	0.1535	0.0025	0.2556	0.0026	0.0011
PF3D7_1206600	DNA-directed RNA polymerase III subunit RPC2, putative	Nucleus	Soluble	0.0067	0.2478	0.0043	0.0012	0.0073	0.0041	0.0023	0.7239	0.002	0.0003
PF3D7_1206900	conserved Plasmodium protein, unknown function	Nucleus	Soluble	0.0015	0.3427	0.0133	0.0002	0.0566	0.1788	0.0039	0.4024	0.0004	0.0003
PF3D7_1207000	conserved Plasmodium protein, unknown function	Cytoplasm	Soluble	0.0092	0.4868	0.0057	0.0002	0.0913	0.0334	0.0008	0.3722	0.0002	0.0001
PF3D7_1207200	conserved Plasmodium protein, unknown function	Cytoplasm	Soluble	0.0047	0.6142	0.0027	0.0004	0.0038	0.0397	0.0012	0.3318	0.0016	0.0001
PF3D7_1207400	conserved Plasmodium protein, unknown function	Nucleus	Soluble	0.0061	0.0907	0.0443	0.0012	0.0694	0.0041	0.1027	0.546	0.0017	0.1338
PF3D7_1207500	RNA-binding protein, putative	Extracellular	Soluble	0.014	0.0693	0.0857	0.649	0.0028	0.0205	0.1514	0.0065	0.0006	0.0002
PF3D7_1207600	tRNA delta(2)-isopentenylpyrophosphate transferase, putative	Endoplasmic reticulum	Membrane	0.0184	0.0307	0.5751	0.1086	0.0171	0.0166	0.2084	0.0155	0.0039	0.0057
PF3D7_1208000	apicoplast ribosomal protein L29 precursor, putative	Extracellular	Soluble	0.0038	0.0133	0.0922	0.7079	0.0003	0.0017	0.1801	0.0006	0.0001	0
PF3D7_1208100	conserved Plasmodium protein, unknown function	Cytoplasm	Soluble	0.0055	0.4865	0.0338	0.0001	0.0257	0.0328	0.0026	0.4085	0.0046	0
PF3D7_1208500	conserved Plasmodium protein, unknown function	Cytoplasm	Soluble	0.0027	0.7352	0.008	0.0009	0.0101	0.04	0.0013	0.2007	0.001	0.0001
PF3D7_1208800	zinc finger protein, putative	Endoplasmic reticulum	Membrane	0.2414	0.0039	0.3691	0.0004	0.1158	0.1731	0.0028	0.0915	0.002	0.0001
PF3D7_1208900	protein phosphatase PPM11, putative	Nucleus	Soluble	0.0044	0.3358	0.0032	0.0003	0.0021	0.0115	0.0004	0.6406	0.0017	0.0001
PF3D7_1209400	cytosolic iron-sulfur protein assembly protein 1, putative	Nucleus	Soluble	0.0052	0.3432	0.0098	0.0024	0.0551	0.1188	0.008	0.4557	0.0014	0.0004
PF3D7_1209500	cGMP-specific phosphodiesterase	Endoplasmic reticulum	Membrane	0.0377	0.004	0.5618	0	0.1803	0.206	0.0035	0.0051	0.0015	0
PF3D7_1209900	ABC transporter B family member 7, putative	Endoplasmic reticulum	Membrane	0.048	0.0111	0.4337	0.0003	0.09	0.0715	0.25	0.0169	0.0759	0.0025
PF3D7_1210100	syntaxin, Qa-SNARE family	Golgi apparatus	Membrane	0.0041	0.0112	0.4231	0	0.4246	0.1236	0.0032	0.0095	0.0006	0.0001
PF3D7_1210600	conserved Plasmodium protein, unknown function	Cytoplasm	Soluble	0.006	0.641	0.0025	0.0014	0.0047	0.0307	0.0007	0.3112	0.0015	0.0001
PF3D7_1211000	kinesin-7, putative	Nucleus	Soluble	0.0013	0.2286	0.0007	0	0.005	0.0702	0.0001	0.6937	0.0002	0.0001
PF3D7_1211300	DNA helicase MCM8, putative	Nucleus	Soluble	0.0031	0.3583	0.0021	0.0003	0.0032	0.0034	0.0013	0.6274	0.001	0.0001
PF3D7_1211600	lysine-specific histone demethylase 1, putative	Nucleus	Soluble	0.0026	0.2153	0.0011	0.0001	0.0024	0.0034	0.0002	0.7746	0.0004	0
PF3D7_1211900	non-SERCA-type Ca2+ -transporting P-ATPase	Cell membrane	Membrane	0.5556	0.0002	0.1947	0.0001	0.0329	0.2115	0.0024	0.0006	0.0019	0.0001
PF3D7_1212000	glutathione peroxidase-like thioredoxin peroxidase	Endoplasmic reticulum	Soluble	0.0048	0.0875	0.367	0.2023	0.0124	0.0806	0.1989	0.0103	0.0055	0.0308
PF3D7_1212400	tetratricopeptide repeat protein, putative	Endoplasmic reticulum	Membrane	0.0073	0.0307	0.6925	0.0003	0.0417	0.0055	0.0299	0.0747	0.1163	0.0011
PF3D7_1212500	glycerol-3-phosphate 1-O-acyltransferase	Endoplasmic reticulum	Membrane	0.2593	0.001	0.5135	0	0.0939	0.1154	0.0097	0.0018	0.0052	0.0002
PF3D7_1212700	eukaryotic translation initiation factor 3 subunit A, putative	Nucleus	Soluble	0.0019	0.1807	0.0037	0	0.0091	0.0007	0	0.8039	0.0001	0
PF3D7_1212800	succinate dehydrogenase [ubiquinone] iron-sulfur subunit, mitochondrial	Mitochondrion	Soluble	0.0044	0.1187	0.0036	0.0019	0.0046	0.0005	0.5131	0.351	0.002	0.0001
PF3D7_1212900	bromodomain protein 2, putative	Nucleus	Soluble	0.0037	0.149	0.0019	0.0002	0.0033	0.0067	0.0008	0.8307	0.0034	0.0003
PF3D7_1213400	kelch domain-containing protein, putative	Nucleus	Soluble	0.0062	0.321	0.0066	0.006	0.0041	0.0184	0.0032	0.6263	0.0068	0.0015
PF3D7_1213500	integral membrane protein GPR180, putative	Endoplasmic reticulum	Membrane	0.0374	0.0007	0.5214	0.0004	0.1412	0.2944	0.0023	0.0017	0.0004	0
PF3D7_1214000	conserved protein, unknown function	Mitochondrion	Membrane	0.0242	0.0118	0.0439	0.0097	0.3034	0.0073	0.5819	0.0103	0.0075	0.0001
PF3D7_1215100	SUN domain-containing protein, putative	Nucleus	Soluble	0.0365	0.2165	0.2179	0.0087	0.1312	0.0912	0.0372	0.237	0.0163	0.0074
PF3D7_1215200	peptidyl-prolyl cis-trans isomerase	Mitochondrion	Membrane	0.0038	0.0141	0.0376	0.0019	0.0164	0.0027	0.9163	0.0012	0.0054	0.0005
PF3D7_1215400	conserved Plasmodium protein, unknown function	Nucleus	Membrane	0.0151	0.0655	0.2869	0.0008	0.1302	0.1205	0.0056	0.3701	0.005	0.0003
PF3D7_1215900	serpentine receptor, putative	Lysosome/Vacuole	Soluble	0.0315	0.0027	0.352	0.0003	0.111	0.4913	0.0031	0.0079	0.0002	0.0001
PF3D7_1216300	signal recognition particle subunit SRP19	Cytoplasm	Soluble	0.0008	0.4918	0.0007	0.0013	0.0002	0.0007	0.0463	0.4522	0.005	0.0012
PF3D7_1216500	male development gene 1	Endoplasmic reticulum	Soluble	0.0012	0.0359	0.6941	0.1091	0.0612	0.0631	0.0187	0.0159	0.0001	0.0007
PF3D7_1216600	cell traversal protein for ookinetes and sporozoites	Endoplasmic reticulum	Soluble	0.009	0.0038	0.446	0.1516	0.1078	0.2328	0.0307	0.0039	0.0025	0.0119
PF3D7_1216900	DNA-binding chaperone, putative	Nucleus	Soluble	0.0054	0.3481	0.0031	0.0005	0.0116	0.0063	0.0019	0.6223	0.0007	0.0002
PF3D7_1217900	PPPDE peptidase domain-containing protein, putative	Cytoplasm	Soluble	0.0053	0.5408	0.0408	0.0028	0.084	0.0829	0.0428	0.1924	0.0076	0.0006
PF3D7_1218200	conserved Plasmodium protein, unknown function	Cytoplasm	Soluble	0.0038	0.4706	0.0932	0.0007	0.0738	0.0849	0.0037	0.2678	0.0015	0.0001
PF3D7_1218500	dynamin-like protein, putative	Cytoplasm	Soluble	0.0063	0.5794	0.0219	0.001	0.0387	0.1205	0.004	0.2203	0.0068	0.0011
PF3D7_1218600	arginine--tRNA ligase	Cytoplasm	Soluble	0.0181	0.3215	0.1536	0.009	0.0958	0.1542	0.1216	0.1051	0.0138	0.0072
PF3D7_1219000	formin 2	Cytoplasm	Soluble	0.0042	0.4944	0.0011	0	0.0109	0.0055	0.0003	0.4833	0.0001	0.0001
PF3D7_1219100	clathrin heavy chain, putative	Cytoplasm	Soluble	0.0062	0.7242	0.0115	0.002	0.0233	0.1369	0.0005	0.0947	0.0007	0.0001
PF3D7_1219300	erythrocyte membrane protein 1, PfEMP1	Nucleus	Soluble	0.0224	0.3455	0.0053	0.0004	0.0023	0.0084	0.0008	0.6133	0.0014	0.0002
PF3D7_1219600	aminophospholipid-transporting P-ATPase	Lysosome/Vacuole	Membrane	0.209	0.0015	0.1726	0	0.1032	0.5086	0.0011	0.0034	0.0005	0.0001
PF3D7_1219700	raf kinase inhibitor	Cytoplasm	Soluble	0.0027	0.7524	0.0032	0.0275	0.0014	0.0148	0.0285	0.1521	0.012	0.0054
PF3D7_1219800	conserved Plasmodium protein, unknown function	Endoplasmic reticulum	Membrane	0.1701	0.0001	0.4278	0	0.3594	0.0305	0.0022	0.0079	0	0.002
PF3D7_1219900	ribulose-phosphate 3-epimerase, putative	Cytoplasm	Soluble	0.006	0.5083	0.0214	0.0834	0.0024	0.0418	0.0911	0.0295	0.1226	0.0934
PF3D7_1220100	pre-mRNA-processing factor 17, putative	Nucleus	Soluble	0.0016	0.1199	0.0014	0.0009	0.0016	0.0006	0.0008	0.8724	0.0007	0.0001
PF3D7_1220300	cell cycle associated protein, putative	Cytoplasm	Soluble	0.0033	0.5932	0.0051	0.0003	0.005	0.0173	0.0014	0.3726	0.0019	0.0001
PF3D7_1220600	conserved Plasmodium protein, unknown function	Endoplasmic reticulum	Membrane	0.0231	0.0065	0.6376	0.0016	0.0547	0.1459	0.1043	0.0102	0.0133	0.0029
PF3D7_1221000	histone-lysine N-methyltransferase, H3 lysine-4 specific	Nucleus	Soluble	0.0017	0.3651	0.0007	0.0001	0.0027	0.0193	0.0002	0.6101	0.0002	0
PF3D7_1221300	conserved Plasmodium protein, unknown function	Nucleus	Soluble	0.0171	0.2327	0.0124	0.0017	0.0187	0.0189	0.0056	0.6804	0.0058	0.0066
PF3D7_1221400	inner membrane complex protein 1h, putative	Cytoplasm	Soluble	0.0068	0.6495	0.0015	0.0003	0.0037	0.0038	0.0014	0.3301	0.0024	0.0005
PF3D7_1221500	heptatricopeptide repeat-containing protein, putative	Nucleus	Soluble	0.0013	0.3157	0.0013	0.0001	0.0057	0.0013	0.0005	0.6739	0.0003	0
PF3D7_1221600	protein TSSC1, putative	Nucleus	Soluble	0.0015	0.1881	0.0033	0.0095	0.0064	0.0366	0.0293	0.7246	0.0006	0.0001
PF3D7_1221900	conserved Plasmodium membrane protein, unknown function	Endoplasmic reticulum	Membrane	0.0338	0.0151	0.5565	0	0.1935	0.141	0.0081	0.0311	0.0207	0.0002
PF3D7_1222300	endoplasmin, putative	Endoplasmic reticulum	Soluble	0.0016	0.004	0.9283	0.0216	0.018	0.0159	0.0051	0.0052	0.0001	0.0003
PF3D7_1222600	AP2 domain transcription factor AP2-G	Nucleus	Soluble	0.0023	0.4498	0.0008	0.0006	0.0009	0.0168	0.0003	0.5283	0.0003	0
PF3D7_1222700	glideosome-associated protein 45	Cell membrane	Membrane	0.5202	0.0152	0.0108	0.0038	0.1056	0.0038	0.0151	0.3251	0	0.0004
PF3D7_1223100	cAMP-dependent protein kinase regulatory subunit	Cell membrane	Membrane	0.81	0.0333	0.0138	0.0005	0.0501	0.0423	0.0099	0.0373	0.0017	0.0011
PF3D7_1223600	conserved Plasmodium protein, unknown function	Nucleus	Soluble	0.0043	0.3468	0.049	0.0009	0.0343	0.0653	0.0011	0.4975	0.0008	0.0001
PF3D7_1223700	vacuolar iron transporter	Lysosome/Vacuole	Membrane	0.0924	0.0012	0.3696	0	0.1559	0.3742	0.0039	0.0018	0.0008	0.0001
PF3D7_1223800	citrate/oxoglutarate carrier protein, putative	Peroxisome	Membrane	0.0067	0.0191	0.2243	0.0024	0.0042	0.0023	0.3167	0.0035	0.4137	0.0069
PF3D7_1223900	50S ribosomal protein L24, putative	Nucleus	Soluble	0.0014	0.2287	0.0001	0.0004	0.0001	0	0.0264	0.7419	0.0008	0.0001
PF3D7_1224200	BRO1 domain-containing protein, putative	Cytoplasm	Soluble	0.0016	0.5439	0.0673	0.0004	0.0454	0.1217	0.0115	0.2062	0.0015	0.0004
PF3D7_1224500	histone chaperone ASF1, putative	Cytoplasm	Soluble	0.0025	0.6761	0.0082	0.0011	0.0273	0.0704	0.001	0.2122	0.0007	0.0005
PF3D7_1225600	conserved Plasmodium protein, unknown function	Nucleus	Soluble	0	0.0368	0.0001	0	0.0001	0	0	0.963	0	0
PF3D7_1226000	conserved protein, unknown function	Mitochondrion	Soluble	0.0014	0.1796	0.0202	0.0018	0.0078	0.0047	0.6707	0.1065	0.0038	0.0034
PF3D7_1226100	haloacid dehalogenase-like hydrolase, putative	Cytoplasm	Soluble	0.0116	0.6357	0.0184	0.0076	0.0128	0.0697	0.0289	0.1565	0.057	0.0019
PF3D7_1226300	haloacid dehalogenase-like hydrolase, putative	Cytoplasm	Soluble	0.006	0.7842	0.0159	0.0066	0.0024	0.0863	0.0052	0.0422	0.0421	0.0091
PF3D7_1226400	conserved Plasmodium protein, unknown function	Nucleus	Soluble	0.0014	0.3043	0.007	0.0001	0.007	0.0028	0.0004	0.6766	0.0003	0
PF3D7_1226800	ataxin-3, putative	Cytoplasm	Soluble	0.0033	0.566	0.0109	0.0022	0.0161	0.0288	0.0647	0.2998	0.0049	0.0033
PF3D7_1227100	DNA helicase 60	Mitochondrion	Soluble	0.0021	0.1709	0.0013	0.0008	0.0039	0.0063	0.5162	0.2901	0.0077	0.0006
PF3D7_1227200	potassium channel K1	Endoplasmic reticulum	Membrane	0.1975	0.005	0.3483	0.0004	0.1205	0.2417	0.0102	0.0621	0.0138	0.0004
PF3D7_1227300	conserved Plasmodium protein, unknown function	Cytoplasm	Soluble	0.0048	0.5018	0.051	0.0009	0.0205	0.0137	0.0262	0.3682	0.0127	0.0002
PF3D7_1227500	protein SOC2, putative	Nucleus	Soluble	0.0039	0.3021	0.0006	0.0002	0.0007	0.0054	0.0001	0.6865	0.0004	0
PF3D7_1228100	leucine-rich repeat protein	Cytoplasm	Soluble	0.0075	0.483	0.0117	0.0003	0.0186	0.0109	0.0015	0.4604	0.0049	0.0011
PF3D7_1228300	NIMA related kinase 1	Cytoplasm	Soluble	0.0133	0.7822	0.0015	0.0006	0.0059	0.0063	0.0003	0.1881	0.0015	0.0001
PF3D7_1228400	conserved Plasmodium protein, unknown function	Nucleus	Soluble	0.0003	0.0839	0.0003	0.0001	0.0004	0.0002	0.0001	0.9147	0	0
PF3D7_1228600	merozoite surface protein 9	Endoplasmic reticulum	Soluble	0.0018	0.0173	0.8143	0.0564	0.0263	0.0082	0.0347	0.0407	0	0.0004
PF3D7_1228700	conserved Plasmodium protein, unknown function	Endoplasmic reticulum	Soluble	0.016	0.0324	0.6133	0.1455	0.0185	0.0647	0.0388	0.0669	0.0005	0.0034
PF3D7_1228800	WD repeat-containing protein, putative	Nucleus	Soluble	0.0061	0.379	0.0041	0.0002	0.0103	0.0124	0.0001	0.5872	0.0007	0
PF3D7_1229300	conserved Plasmodium protein, unknown function	Endoplasmic reticulum	Membrane	0.0298	0.0066	0.535	0.0044	0.277	0.121	0.008	0.0176	0.0005	0.0001
PF3D7_1229600	conserved Plasmodium protein, unknown function	Nucleus	Soluble	0.0058	0.0903	0.2903	0.0157	0.0265	0.0093	0.0096	0.5511	0.0009	0.0005
PF3D7_1230000	TBC domain-containing protein, putative	Nucleus	Soluble	0.0042	0.4002	0.0028	0.0002	0.0016	0.0159	0.0007	0.5736	0.0007	0
PF3D7_1230400	ATP-dependent protease subunit ClpQ	Mitochondrion	Soluble	0.0008	0.1006	0.0007	0.0024	0.0003	0.0009	0.8778	0.0041	0.0083	0.0041
PF3D7_1230600	sun-family protein, putative	Mitochondrion	Soluble	0.0001	0.0259	0.0015	0.0004	0.0003	0.0001	0.9577	0.0083	0.0054	0.0002
PF3D7_1230700	protein transport protein SEC13	Cytoplasm	Soluble	0.0032	0.6275	0.0007	0.0014	0.0018	0.0125	0.0002	0.3523	0.0003	0
PF3D7_1231000	conserved Plasmodium protein, unknown function	Nucleus	Soluble	0.0024	0.1037	0.0007	0.0001	0.0031	0.0033	0.0012	0.8846	0.0003	0.0005
PF3D7_1231400	amino acid transporter, putative	Cell membrane	Membrane	0.312	0.0019	0.2307	0.0001	0.1535	0.2814	0.003	0.016	0.0013	0.0002
PF3D7_1231500	mitosis protein dim1, putative	Nucleus	Soluble	0.0069	0.3578	0.0118	0.0237	0.0079	0.0685	0.0943	0.3967	0.006	0.0266
PF3D7_1231600	pre-mRNA-splicing factor ATP-dependent RNA helicase PRP2, putative	Nucleus	Soluble	0.0001	0.0238	0.0001	0	0	0	0	0.976	0	0
PF3D7_1232000	phenylalanine--tRNA ligase	Endoplasmic reticulum	Soluble	0.008	0.0575	0.7398	0.046	0.0248	0.0518	0.0446	0.024	0.0016	0.0019
PF3D7_1232100	60 kDa chaperonin	Endoplasmic reticulum	Membrane	0.0019	0.0011	0.5623	0.0044	0.3939	0.0051	0.0152	0.0158	0.0001	0.0003
PF3D7_1232600	conserved Plasmodium protein, unknown function	Mitochondrion	Soluble	0.0047	0.2056	0.0407	0.0103	0.0233	0.024	0.5747	0.1102	0.0059	0.0005
PF3D7_1232700	conserved Plasmodium protein, unknown function	Endoplasmic reticulum	Soluble	0.0024	0.2854	0.3523	0.0354	0.1031	0.1158	0.0378	0.0627	0.0046	0.0006
PF3D7_1233200	conserved Plasmodium protein, unknown function	Nucleus	Soluble	0.0026	0.3414	0.0006	0.0003	0.0009	0.0115	0.0003	0.6418	0.0007	0
PF3D7_1233300	pentatricopeptide repeat domain-containing protein, putative	Nucleus	Soluble	0.0027	0.3168	0.0118	0.0004	0.0165	0.0114	0.0319	0.6049	0.0023	0.0013
PF3D7_1233400	conserved Plasmodium membrane protein, unknown function	Endoplasmic reticulum	Membrane	0.0245	0.0027	0.4889	0	0.1884	0.2845	0.0018	0.0076	0.0015	0
PF3D7_1233600	asparagine and aspartate rich protein 1	Cytoplasm	Soluble	0.0032	0.5143	0.0036	0.0003	0.0053	0.071	0.0004	0.401	0.0007	0.0001
PF3D7_1233700	homocysteine S-methyltransferase, putative	Nucleus	Soluble	0.0047	0.3798	0.012	0.0035	0.0035	0.0197	0.0063	0.5664	0.0035	0.0005
PF3D7_1233800	conserved protein, unknown function	Nucleus	Soluble	0.0008	0.0984	0.0003	0.0006	0.0018	0.0004	0.3077	0.5893	0.0005	0.0003
PF3D7_1234300	DNA polymerase epsilon subunit B, putative	Cytoplasm	Soluble	0.0035	0.645	0.0179	0.002	0.0278	0.095	0.0044	0.203	0.001	0.0003
PF3D7_1234600	protein TOC75, putative	Endoplasmic reticulum	Membrane	0.0085	0.0128	0.431	0.0196	0.3633	0.0138	0.1141	0.0266	0.0101	0.0002
PF3D7_1234700	upregulated in late gametocytes ULG8	Extracellular	Soluble	0.0239	0.037	0.138	0.6477	0.0426	0.0587	0.004	0.0482	0.0001	0
PF3D7_1234800	splicing factor 3B subunit 3, putative	Nucleus	Soluble	0.0027	0.3856	0.0063	0.0003	0.0146	0.0281	0.0067	0.5531	0.002	0.0006
PF3D7_1235000	PIH1 domain-containing protein, putative	Cytoplasm	Soluble	0.0154	0.3375	0.0632	0.0151	0.0825	0.0374	0.1389	0.2992	0.0084	0.0023
PF3D7_1235200	V-type K+-independent H+-translocating inorganic pyrophosphatase	Lysosome/Vacuole	Soluble	0.2123	0.0001	0.0698	0.0001	0.0606	0.6555	0.0012	0.0001	0.0003	0
PF3D7_1235400	tetQ family GTPase, putative	Cytoplasm	Soluble	0.0096	0.4912	0.0428	0.0012	0.0853	0.0904	0.0836	0.1813	0.0136	0.0009
PF3D7_1235800	conserved Plasmodium protein, unknown function	Nucleus	Soluble	0.0027	0.4114	0.0072	0.0001	0.0091	0.0249	0.0005	0.5437	0.0005	0
PF3D7_1236000	vesicle transport v-SNARE protein VTI1, putative	Golgi apparatus	Membrane	0.0059	0.035	0.402	0.0003	0.4429	0.0483	0.0136	0.0494	0.0022	0.0005
PF3D7_1236100	clustered-asparagine-rich protein	Cytoplasm	Soluble	0.0045	0.6378	0.0058	0.004	0.0063	0.0378	0.0049	0.2924	0.0058	0.0006
PF3D7_1236200	conserved Plasmodium protein, unknown function	Nucleus	Soluble	0.0022	0.4176	0.0008	0	0.0023	0.0073	0.0002	0.5693	0.0002	0
PF3D7_1236300	conserved protein, unknown function	Cytoplasm	Soluble	0.0034	0.5354	0.0648	0.0012	0.0374	0.1299	0.0036	0.2199	0.0031	0.0012
PF3D7_1236500	conserved Plasmodium protein, unknown function	Nucleus	Soluble	0.004	0.3716	0.0113	0.0021	0.0032	0.0169	0.0032	0.5842	0.0018	0.0016
PF3D7_1237300	conserved Plasmodium protein, unknown function	Cytoplasm	Soluble	0.0013	0.7031	0.0073	0.0017	0.0095	0.0618	0.0041	0.2075	0.0008	0.0028
PF3D7_1237400	hydrolase, putative	Cytoplasm	Soluble	0.0042	0.6321	0.022	0.0104	0.0126	0.112	0.0116	0.1777	0.0074	0.0099
PF3D7_1237900	conserved Plasmodium protein, unknown function	Nucleus	Membrane	0.0004	0.0029	0.1081	0.0003	0.2365	0.0032	0.0343	0.6139	0.0002	0.0003
PF3D7_1238200	conserved Plasmodium protein, unknown function	Nucleus	Soluble	0.0064	0.3076	0.0128	0.0034	0.022	0.006	0.1925	0.4421	0.0071	0.0002
PF3D7_1238400	conserved protein, unknown function	Cytoplasm	Soluble	0.0033	0.404	0.0535	0.003	0.0264	0.014	0.072	0.4021	0.021	0.0008
PF3D7_1238600	sphingomyelin phosphodiesterase	Cytoplasm	Soluble	0.0082	0.2393	0.1486	0.0206	0.0446	0.0461	0.2391	0.1656	0.0581	0.0299
PF3D7_1238800	acyl-CoA synthetase	Cytoplasm	Soluble	0.0068	0.6404	0.0091	0.0031	0.0061	0.0265	0.0054	0.2875	0.0138	0.0013
PF3D7_1239200	AP2 domain transcription factor, putative	Nucleus	Soluble	0.0029	0.3734	0.0025	0.0001	0.0233	0.0248	0.0006	0.5722	0.0003	0
PF3D7_1239400	conserved protein, unknown function	Extracellular	Soluble	0.0002	0.0019	0.2627	0.7041	0.0005	0.0281	0.0022	0.0002	0	0
PF3D7_1239600	hydroxyethylthiazole kinase	Mitochondrion	Soluble	0.0013	0.0912	0.0024	0.0029	0.0018	0.0012	0.8748	0.0084	0.015	0.0011
PF3D7_1239700	ATP-dependent zinc metalloprotease FTSH 1	Endoplasmic reticulum	Membrane	0.0285	0.0057	0.5006	0.0001	0.2601	0.0655	0.0328	0.0916	0.0113	0.0039
PF3D7_1239800	conserved Plasmodium protein, unknown function	Cytoplasm	Soluble	0.0034	0.5905	0.0062	0	0.1644	0.0201	0.0004	0.2149	0	0.0001
PF3D7_1240000	3-hydroxyisobutyryl-coenzyme A hydrolase, putative	Mitochondrion	Soluble	0.0004	0.0466	0.0044	0.0005	0.0022	0.0049	0.8943	0.0186	0.002	0.026
PF3D7_1240300	erythrocyte membrane protein 1, PfEMP1	Nucleus	Soluble	0.0336	0.3843	0.0071	0.0006	0.0069	0.0183	0.0011	0.5462	0.0017	0.0002
PF3D7_1240400	erythrocyte membrane protein 1, PfEMP1	Nucleus	Soluble	0.04	0.3777	0.0078	0.0005	0.0046	0.008	0.0015	0.5545	0.0047	0.0006
PF3D7_1240600	erythrocyte membrane protein 1, PfEMP1	Nucleus	Soluble	0.0517	0.3742	0.0024	0.0003	0.0045	0.0089	0.0008	0.5553	0.0016	0.0003
PF3D7_1240900	erythrocyte membrane protein 1, PfEMP1	Nucleus	Soluble	0.0189	0.1849	0.0008	0.0001	0.0011	0.0005	0.0002	0.7924	0.0009	0.0001
PF3D7_1241300	ribosome-binding factor A, putative	Nucleus	Soluble	0.0021	0.1348	0.0155	0.0007	0.0322	0.0102	0.2771	0.5229	0.0037	0.0007
PF3D7_1241400	RNA-binding protein, putative	Cytoplasm	Soluble	0.0068	0.808	0.0018	0.0011	0.0044	0.0707	0.0004	0.1058	0.0009	0.0001
PF3D7_1241700	replication factor C subunit 4, putative	Cytoplasm	Soluble	0.019	0.555	0.017	0.0011	0.0093	0.013	0.0087	0.108	0.2661	0.0028
PF3D7_1242800	rab specific GDP dissociation inhibitor	Cytoplasm	Soluble	0.0081	0.6449	0.0598	0.0263	0.0055	0.1638	0.0076	0.0541	0.0267	0.0032
PF3D7_1243200	conserved Plasmodium protein, unknown function	Endoplasmic reticulum	Membrane	0.0341	0.0001	0.5185	0.0001	0.4284	0.0163	0.0021	0.0003	0.0002	0
PF3D7_1243500	vacuolar-sorting protein SNF7, putative	Nucleus	Membrane	0.0505	0.049	0.0075	0.0009	0.1898	0.0051	0.0298	0.6665	0.0002	0.0007
PF3D7_1243900	double C2-like domain-containing protein	Nucleus	Soluble	0.0048	0.2576	0.0143	0.0001	0.0141	0.0029	0.0008	0.7047	0.0007	0.0001
PF3D7_1244100	N-alpha-acetyltransferase 15, NatA auxiliary subunit, putative	Nucleus	Soluble	0.0017	0.4772	0.0091	0.0001	0.0124	0.0084	0.0012	0.4894	0.0005	0
PF3D7_1244400	RNA-binding protein, putative	Nucleus	Soluble	0.0223	0.2604	0.2135	0.0107	0.084	0.0397	0.039	0.3219	0.0036	0.005
PF3D7_1244500	conserved Plasmodium protein, unknown function	Endoplasmic reticulum	Membrane	0.0346	0.0627	0.5508	0.0637	0.1324	0.0605	0.0361	0.0453	0.0114	0.0025
PF3D7_1244600	ADP-ribosylation factor GTPase-activating protein	Nucleus	Soluble	0.0365	0.319	0.0151	0.0163	0.0504	0.067	0.0886	0.3729	0.0282	0.006
PF3D7_1245100	kinesin-13, putative	Cytoplasm	Soluble	0.008	0.7947	0.0028	0.0008	0.0056	0.049	0.0005	0.1354	0.0029	0.0002
PF3D7_1245900	ankyrin-repeat protein, putative	Cytoplasm	Soluble	0.006	0.4234	0.0345	0.0067	0.0442	0.3183	0.0034	0.1614	0.0008	0.0014
PF3D7_1246000	conserved Plasmodium protein, unknown function	Endoplasmic reticulum	Membrane	0.0304	0.0002	0.8653	0.0002	0.0349	0.0672	0.0008	0.0006	0.0002	0
PF3D7_1246100	delta-aminolevulinic acid synthetase	Nucleus	Soluble	0.0052	0.236	0.006	0.0019	0.0083	0.0011	0.2741	0.453	0.014	0.0005
PF3D7_1246200	actin I	Cytoplasm	Soluble	0.0272	0.7204	0.0132	0.0063	0.005	0.0926	0.0026	0.0451	0.08	0.0076
PF3D7_1246300	conserved Plasmodium protein, unknown function	Cytoplasm	Soluble	0.0198	0.4313	0.0367	0.0025	0.0806	0.0621	0.0108	0.3486	0.007	0.0005
PF3D7_1246900	RAC-beta serine/threonine protein kinase	Nucleus	Soluble	0.0024	0.0346	0.0001	0.0003	0.0002	0.0001	0.0045	0.9575	0.0001	0.0001
PF3D7_1247000	DNA replication origin binding protein, putative	Cytoplasm	Soluble	0.001	0.5508	0.0071	0.0003	0.0049	0.0048	0.0031	0.4259	0.0021	0.0001
PF3D7_1247100	conserved protein, unknown function	Cytoplasm	Soluble	0.0101	0.3787	0.042	0.0087	0.0341	0.0799	0.0502	0.3415	0.05	0.0049
PF3D7_1247400	peptidyl-prolyl cis-trans isomerase FKBP35	Cytoplasm	Soluble	0.0063	0.8436	0.0071	0.0006	0.0035	0.0319	0.0011	0.0885	0.014	0.0034
PF3D7_1247800	dipeptidyl aminopeptidase 2	Extracellular	Soluble	0.0008	0.0017	0.061	0.8371	0.0003	0.0983	0.0005	0.0002	0	0
PF3D7_1248000	tRNA-splicing endonuclease, putative	Cytoplasm	Soluble	0.0045	0.4866	0.0655	0.0116	0.022	0.1561	0.016	0.2305	0.0057	0.0014
PF3D7_1248100	methyltransferase, putative	Cytoplasm	Soluble	0.0134	0.4544	0.0255	0.0056	0.0166	0.0465	0.0057	0.3718	0.0599	0.0005
PF3D7_1248200	pre-mRNA-splicing factor RBM22, putative	Nucleus	Soluble	0.0015	0.2266	0.0002	0.0007	0.0006	0.0003	0.0138	0.7555	0.0008	0
PF3D7_1248400	conserved Plasmodium protein, unknown function	Nucleus	Soluble	0.0019	0.281	0.0065	0.0016	0.0053	0.0032	0.0219	0.6745	0.0041	0.0001
PF3D7_1248800	conserved Plasmodium protein, unknown function	Mitochondrion	Soluble	0.0004	0.151	0.0008	0.0056	0.0006	0.0003	0.7677	0.071	0.0024	0.0002
PF3D7_1249800	THO complex subunit 2, putative	Cytoplasm	Soluble	0.002	0.6616	0.0019	0.0001	0.0043	0.0113	0.0003	0.318	0.0004	0
PF3D7_1250100	osmiophilic body protein G377	Endoplasmic reticulum	Soluble	0.0032	0.199	0.5234	0.0246	0.0551	0.0861	0.0049	0.1031	0.0003	0.0003
PF3D7_1250300	vacuolar protein sorting-associated protein 26, putative	Cytoplasm	Soluble	0.0196	0.538	0.0159	0.0242	0.011	0.0683	0.0479	0.1836	0.0143	0.0773
PF3D7_1250600	translation initiation factor eIF-2B subunit beta, putative	Cytoplasm	Soluble	0.0137	0.526	0.0103	0.0061	0.006	0.0236	0.0102	0.3429	0.0583	0.003
PF3D7_1250700	conserved Plasmodium protein, unknown function	Cytoplasm	Soluble	0.0024	0.498	0.029	0.0153	0.0153	0.151	0.0361	0.2496	0.0012	0.0022
PF3D7_1250800	DNA repair protein rhp16, putative	Nucleus	Soluble	0.0007	0.1998	0.0002	0	0.0007	0.0005	0	0.798	0.0001	0
PF3D7_1251100	conserved Plasmodium protein, unknown function	Endoplasmic reticulum	Membrane	0.2095	0.0003	0.5014	0.0002	0.156	0.1292	0.0019	0.0009	0.0005	0.0001
PF3D7_1251700	tryptophan--tRNA ligase	Endoplasmic reticulum	Soluble	0.0302	0.0146	0.511	0.2911	0.0254	0.046	0.0689	0.0073	0.005	0.0007
PF3D7_1252100	rhoptry neck protein 3	Endoplasmic reticulum	Membrane	0.024	0.0371	0.7467	0.0053	0.0509	0.04	0.0506	0.0234	0.0206	0.0014
PF3D7_1252200	chitinase	Endoplasmic reticulum	Soluble	0.0095	0.0015	0.529	0.1539	0.0047	0.3002	0.0008	0.0003	0.0001	0.0002
PF3D7_1252300	conserved Plasmodium protein, unknown function	Endoplasmic reticulum	Membrane	0.2208	0.0042	0.5534	0.0018	0.0329	0.0219	0.1151	0.0047	0.0265	0.0187
PF3D7_1252400	reticulocyte binding protein homologue 3, pseudogene	Endoplasmic reticulum	Membrane	0.0241	0.0125	0.6779	0.009	0.1879	0.0573	0.0171	0.012	0.0019	0.0005
PF3D7_1252500	Plasmodium exported protein, unknown function	Golgi apparatus	Membrane	0.0687	0.0012	0.3346	0.0002	0.3531	0.226	0.0083	0.0066	0.0011	0.0003
PF3D7_1252700	Plasmodium exported protein (PHISTb), unknown function	Nucleus	Soluble	0.0162	0.1359	0.0869	0.0037	0.077	0.0234	0.0811	0.3233	0.1376	0.1149
PF3D7_1252800	Plasmodium exported protein (PHISTb), unknown function	Golgi apparatus	Membrane	0.0039	0.0331	0.2344	0.002	0.466	0.0404	0.0498	0.1649	0.0052	0.0003
PF3D7_1253000	gametocyte erythrocyte cytosolic protein	Endoplasmic reticulum	Membrane	0.002	0.0032	0.8293	0.0056	0.1279	0.0167	0.0107	0.004	0.0004	0.0003
PF3D7_1253400	acyl-CoA synthetase	Endoplasmic reticulum	Soluble	0.005	0.0081	0.816	0.1207	0.0047	0.0358	0.0042	0.0053	0.0001	0.0002
PF3D7_1253700	rifin	Cell membrane	Membrane	0.7414	0	0.185	0.0001	0.0441	0.0241	0.0044	0.0002	0.0007	0.0001
PF3D7_1253800	Plasmodium exported protein (PHISTa), unknown function	Golgi apparatus	Membrane	0.0014	0.0054	0.4747	0	0.5089	0.0045	0.0029	0.002	0.0001	0
PF3D7_1254000	rifin	Cell membrane	Membrane	0.7159	0.0001	0.2088	0.0005	0.0157	0.0067	0.039	0.0003	0.0055	0.0075
PF3D7_1254100	stevor	Cell membrane	Membrane	0.9466	0	0.0481	0	0.004	0.0009	0.0002	0.0001	0.0001	0
PF3D7_1254200	rifin	Cell membrane	Membrane	0.847	0	0.1219	0.0001	0.0031	0.0022	0.0079	0.0003	0.0022	0.0153
PF3D7_1254300	stevor	Cell membrane	Membrane	0.679	0	0.2295	0.0001	0.0444	0.0436	0.0027	0.0001	0.0004	0.0001
PF3D7_1254400	rifin	Cell membrane	Membrane	0.9302	0	0.036	0.0003	0.0009	0.001	0.0071	0.0003	0.0015	0.0225
PF3D7_1254500	rifin	Cell membrane	Membrane	0.7798	0	0.1921	0.0001	0.008	0.0114	0.0059	0.0002	0.0016	0.0009
PF3D7_1254600	stevor	Cell membrane	Membrane	0.7936	0	0.1352	0.0007	0.0243	0.034	0.0093	0.0003	0.001	0.0015
PF3D7_1254700	rifin	Cell membrane	Membrane	0.4102	0.0013	0.4094	0.0004	0.0145	0.013	0.0953	0.0046	0.0235	0.0279
PF3D7_1254800	rifin	Cell membrane	Membrane	0.3864	0.0026	0.3213	0.0001	0.0265	0.0152	0.1529	0.0087	0.0601	0.0262
PF3D7_1255000	rifin	Cell membrane	Membrane	0.8665	0	0.1097	0.0008	0.009	0.0043	0.0033	0.0001	0.0004	0.0058
PF3D7_1255100	rifin	Cell membrane	Membrane	0.536	0.0027	0.2679	0.0004	0.0181	0.013	0.1198	0.0031	0.017	0.0223
PF3D7_1255200	erythrocyte membrane protein 1, PfEMP1	Nucleus	Soluble	0.0227	0.2457	0.0109	0.0003	0.0055	0.0824	0.0006	0.6309	0.0008	0.0002
PF3D7_1300100	erythrocyte membrane protein 1, PfEMP1	Cytoplasm	Soluble	0.0338	0.5621	0.0047	0.0006	0.0077	0.037	0.0027	0.3477	0.0027	0.0011
PF3D7_1300200	rifin	Cell membrane	Membrane	0.9169	0.0001	0.0588	0.0001	0.003	0.0009	0.0064	0.0003	0.0059	0.0077
PF3D7_1300300	erythrocyte membrane protein 1, PfEMP1	Nucleus	Soluble	0.0187	0.2467	0.0016	0.0001	0.0028	0.0014	0.0004	0.7274	0.0009	0.0001
PF3D7_1300400	rifin	Cell membrane	Membrane	0.4625	0.002	0.1374	0.0005	0.0104	0.0116	0.2654	0.0033	0.0478	0.0591
PF3D7_1300500	rifin	Cell membrane	Membrane	0.9205	0	0.0539	0.0002	0.0018	0.0021	0.0037	0.0002	0.001	0.0167
PF3D7_1300600	rifin	Cell membrane	Membrane	0.9627	0	0.0298	0.0001	0.0029	0.0016	0.0012	0	0.0001	0.0016
PF3D7_1300700	rifin	Cell membrane	Membrane	0.6848	0.0002	0.2803	0.0003	0.01	0.0035	0.0066	0.0004	0.006	0.0079
PF3D7_1300800	erythrocyte membrane protein 1 (PfEMP1), pseudogene	Endoplasmic reticulum	Membrane	0.0137	0.113	0.4417	0.001	0.0942	0.0998	0.0133	0.2045	0.0166	0.0024
PF3D7_1300900	stevor	Cell membrane	Membrane	0.9826	0	0.0081	0	0.0023	0.0066	0.0004	0	0	0
PF3D7_1301500	Plasmodium exported protein (PHISTa), unknown function	Endoplasmic reticulum	Membrane	0.0174	0.0034	0.6131	0.0002	0.2887	0.0227	0.0343	0.0113	0.0085	0.0004
PF3D7_1301600	erythrocyte binding antigen-140	Cell membrane	Membrane	0.4518	0.0056	0.227	0.0308	0.1799	0.0744	0.0072	0.0217	0.0009	0.0006
PF3D7_1301700	CX3CL1-binding protein 2	Endoplasmic reticulum	Membrane	0.1284	0.0001	0.5563	0.0018	0.2412	0.0186	0.0309	0.0008	0.0015	0.0204
PF3D7_1301900	Plasmodium exported protein, unknown function	Mitochondrion	Membrane	0.0086	0.0308	0.1331	0.039	0.0892	0.0027	0.6462	0.0361	0.0143	0.0001
PF3D7_1302000	EMP1-trafficking protein	Endoplasmic reticulum	Membrane	0.0162	0.0022	0.7985	0	0.1302	0.0037	0.0072	0.034	0.008	0.0002
PF3D7_1302100	gamete antigen 27/25	Cytoplasm	Soluble	0.0031	0.5947	0.0046	0.0008	0.0042	0.0108	0.0066	0.3731	0.0014	0.0008
PF3D7_1302200	protein UIS3	Endoplasmic reticulum	Membrane	0.0669	0.0056	0.4784	0.0135	0.1866	0.0226	0.1959	0.0057	0.0168	0.0081
PF3D7_1302500	conserved Plasmodium protein, unknown function	Nucleus	Soluble	0.0047	0.4333	0.0103	0.0001	0.0154	0.0206	0.0017	0.5111	0.0026	0.0001
PF3D7_1302600	deoxyhypusine hydroxylase	Cytoplasm	Soluble	0.0018	0.6272	0.0053	0.0003	0.01	0.0309	0.0009	0.323	0.0005	0.0003
PF3D7_1302700	ATP-dependent RNA helicase DHR1, putative	Nucleus	Soluble	0.0004	0.2008	0.0029	0	0.0088	0.0021	0.0004	0.7843	0.0002	0.0001
PF3D7_1303100	methyltransferase, putative	Cytoplasm	Soluble	0.001	0.7792	0.0064	0.0008	0.0018	0.0089	0.0024	0.1924	0.0064	0.0008
PF3D7_1303300	conserved Plasmodium protein, unknown function	Cytoplasm	Soluble	0.0215	0.3574	0.0779	0.0107	0.0584	0.1899	0.0109	0.2679	0.0038	0.0015
PF3D7_1304000	condensin complex subunit 2, putative	Nucleus	Soluble	0.0015	0.2809	0.0013	0.0002	0.0017	0.0196	0.0003	0.6939	0.0003	0.0001
PF3D7_1304100	DNA ligase I	Mitochondrion	Soluble	0.009	0.1226	0.3031	0.041	0.0154	0.0155	0.3512	0.053	0.0156	0.0735
PF3D7_1304200	CorA-like Mg2+ transporter protein, putative	Endoplasmic reticulum	Membrane	0.0621	0.0041	0.7075	0	0.1017	0.0643	0.0183	0.0299	0.0113	0.0009
PF3D7_1304300	conserved Plasmodium protein, unknown function	Mitochondrion	Membrane	0.005	0.0119	0.2091	0.0689	0.2827	0.0259	0.3891	0.0049	0.0019	0.0004
PF3D7_1304500	small heat shock protein, putative	Nucleus	Soluble	0.0014	0.1757	0.0048	0.0004	0.0024	0.0038	0.019	0.789	0.0029	0.0007
PF3D7_1304700	cyclin	Nucleus	Soluble	0.0061	0.3947	0.0457	0.0011	0.0198	0.0058	0.017	0.5027	0.0067	0.0004
PF3D7_1305100	conserved protein, unknown function	Endoplasmic reticulum	Membrane	0.0214	0.0144	0.3631	0.0662	0.1027	0.0061	0.1864	0.238	0.0013	0.0005
PF3D7_1305300	conserved Plasmodium protein, unknown function	Nucleus	Soluble	0.0018	0.3657	0.0196	0.0001	0.027	0.0225	0.0006	0.5624	0.0004	0
PF3D7_1305400	AAR2 protein, putative	Nucleus	Soluble	0.0096	0.3783	0.0419	0.0025	0.0345	0.0819	0.0031	0.4456	0.002	0.0005
PF3D7_1305500	mitogen-activated protein kinase phosphatase 1, putative	Cytoplasm	Soluble	0.0176	0.2505	0.215	0.0008	0.1328	0.161	0.0022	0.2176	0.0024	0.0002
PF3D7_1305700	conserved Plasmodium protein, unknown function	Plastid	Soluble	0.0316	0.0313	0.1705	0.2305	0.0301	0.0552	0.1629	0.0551	0.0021	0.2306
PF3D7_1305900	conserved Plasmodium protein, unknown function	Nucleus	Soluble	0.0015	0.3194	0.0036	0.0002	0.0007	0.0004	0.0011	0.6704	0.0028	0
PF3D7_1306300	SAM dependent methyltransferase, putative	Nucleus	Soluble	0.005	0.2748	0.0436	0.0039	0.0144	0.0334	0.1247	0.4933	0.0049	0.0019
PF3D7_1306400	26S protease regulatory subunit 10B, putative	Cytoplasm	Soluble	0.012	0.7892	0.0079	0.0023	0.0029	0.0135	0.0036	0.1218	0.0414	0.0054
PF3D7_1306500	MORN repeat protein, putative	Endoplasmic reticulum	Membrane	0.1554	0.0051	0.5339	0.0005	0.1413	0.1329	0.0052	0.0222	0.0034	0
PF3D7_1307000	exosome complex component RRP40, putative	Cytoplasm	Soluble	0.0125	0.6045	0.0363	0.0105	0.0228	0.1191	0.009	0.1536	0.0286	0.0031
PF3D7_1307200	DnaJ protein, putative	Nucleus	Soluble	0.0005	0.0697	0.0008	0	0.0063	0.0012	0.0006	0.9208	0	0
PF3D7_1307400	conserved Plasmodium protein, unknown function	Nucleus	Soluble	0.0347	0.3909	0.0283	0.0028	0.0275	0.0479	0.0008	0.4657	0.0009	0.0003
PF3D7_1308200	carbamoyl phosphate synthetase	Cytoplasm	Soluble	0.0076	0.698	0.003	0.0011	0.004	0.041	0.0009	0.2392	0.0051	0.0002
PF3D7_1308400	conserved Plasmodium protein, unknown function	Cytoplasm	Soluble	0.005	0.7249	0.0049	0.0002	0.0064	0.0409	0.0008	0.2151	0.0018	0.0001
PF3D7_1308500	conserved Plasmodium protein, unknown function	Cytoplasm	Soluble	0.0017	0.6281	0.0116	0.0008	0.0145	0.0329	0.0048	0.3021	0.0031	0.0004
PF3D7_1308900	mRNA-decapping enzyme 2, putative	Cytoplasm	Soluble	0.0094	0.4829	0.0044	0.0009	0.0047	0.023	0.0015	0.4688	0.0042	0.0002
PF3D7_1309300	U4/U6 small nuclear ribonucleoprotein PRP3, putative	Nucleus	Soluble	0.0003	0.0162	0.0007	0	0.0005	0.0002	0.0003	0.9812	0.0003	0.0003
PF3D7_1309400	HORMA domain protein, putative	Nucleus	Soluble	0.0032	0.2616	0.0009	0.0002	0.0024	0.0095	0.0006	0.7212	0.0003	0
PF3D7_1309500	H/ACA ribonucleoprotein complex subunit 1, putative	Nucleus	Soluble	0.0089	0.0402	0.0005	0.001	0.0009	0.0006	0.0001	0.9477	0	0
PF3D7_1309900	conserved Plasmodium protein, unknown function	Mitochondrion	Membrane	0.0007	0.0147	0.0033	0.0017	0.0003	0.0008	0.962	0.004	0.0043	0.0081
PF3D7_1310200	conserved Plasmodium protein, unknown function	Endoplasmic reticulum	Membrane	0.0945	0.0001	0.825	0.0003	0.0671	0.0055	0.0055	0.0004	0.0011	0.0005
PF3D7_1310500	ER membrane protein complex subunit 7, putative	Endoplasmic reticulum	Membrane	0.0067	0.0018	0.8477	0.0003	0.1251	0.0087	0.005	0.0035	0.0012	0
PF3D7_1310800	tetratricopeptide repeat protein, putative	Cytoplasm	Soluble	0.0033	0.7362	0.0143	0.0005	0.0245	0.0727	0.0008	0.1468	0.0008	0.0001
PF3D7_1311000	protein ISD11	Mitochondrion	Soluble	0.0006	0.0332	0.0004	0.0157	0.0007	0.0005	0.9187	0.024	0.0062	0
PF3D7_1311400	AP-1 complex subunit mu-1	Cytoplasm	Soluble	0.0073	0.5953	0.0464	0.0277	0.0177	0.1607	0.0359	0.0876	0.0146	0.0068
PF3D7_1311800	M1-family alanyl aminopeptidase	Endoplasmic reticulum	Membrane	0.0128	0.0238	0.3705	0.0352	0.2188	0.0295	0.236	0.0563	0.0094	0.0077
PF3D7_1312100	GYF domain-containing protein, putative	Cytoplasm	Soluble	0.0046	0.6071	0.0057	0.0003	0.0277	0.0338	0.0014	0.3185	0.0007	0.0001
PF3D7_1312700	conserved Plasmodium protein, unknown function	Nucleus	Soluble	0.0041	0.1729	0.1722	0.0248	0.0492	0.0191	0.045	0.5076	0.0045	0.0006
PF3D7_1312800	conserved Plasmodium protein, unknown function	Nucleus	Soluble	0.0014	0.184	0.0023	0.0001	0.0166	0.0157	0.0001	0.7796	0.0001	0
PF3D7_1312900	eukaryotic translation initation factor 4 gamma	Cytoplasm	Soluble	0.01	0.4823	0.0109	0.0008	0.0513	0.028	0.001	0.4148	0.0008	0.0002
PF3D7_1313500	conserved Plasmodium membrane protein, unknown function	Endoplasmic reticulum	Membrane	0.114	0.001	0.3673	0	0.1658	0.3435	0.0008	0.0073	0.0003	0
PF3D7_1313700	Maf-like protein, putative	Cytoplasm	Soluble	0.0041	0.801	0.0139	0.0106	0.0041	0.0508	0.0134	0.0765	0.0226	0.0029
PF3D7_1313900	ankyrin-repeat protein, putative	Endoplasmic reticulum	Membrane	0.0108	0.0094	0.7345	0	0.1598	0.0094	0.04	0.0134	0.0225	0.0002
PF3D7_1314000	conserved protein, unknown function	Mitochondrion	Soluble	0.0032	0.297	0.0208	0.0026	0.0148	0.0325	0.532	0.0797	0.0133	0.0042
PF3D7_1314200	telomerase reverse transcriptase	Nucleus	Soluble	0.0035	0.3736	0.0009	0.0003	0.0006	0.0007	0.008	0.6086	0.0039	0.0001
PF3D7_1314400	conserved protein, unknown function	Mitochondrion	Soluble	0.0104	0.2514	0.0066	0.0041	0.0061	0.0209	0.5707	0.0707	0.0235	0.0356
PF3D7_1314500	transmembrane emp24 domain-containing protein, putative	Endoplasmic reticulum	Membrane	0.0135	0.0004	0.9005	0.0004	0.0658	0.0135	0.002	0.0037	0.0001	0.0001
PF3D7_1314700	pinin/SDK/MemA domain-containing protein, putative	Nucleus	Soluble	0.0003	0.0307	0.0003	0	0.0012	0.0002	0.0001	0.9672	0	0
PF3D7_1314800	ubiquitin-like protein, putative	Cytoplasm	Soluble	0.01	0.5514	0.0248	0.0028	0.0185	0.0633	0.0021	0.3255	0.0009	0.0007
PF3D7_1314900	general transcription factor IIH subunit 2	Nucleus	Soluble	0.0018	0.4257	0.0004	0.0007	0.001	0.0028	0.0008	0.5662	0.0004	0.0001
PF3D7_1315400	zinc finger (CCCH type) protein, putative	Nucleus	Soluble	0.0047	0.1273	0.0028	0.0025	0.0021	0.0044	0.0217	0.8302	0.0042	0.0002
PF3D7_1315700	tRNA (adenine(58)-N(1))-methyltransferase catalytic subunit TRM61, putative	Cytoplasm	Soluble	0.0052	0.5682	0.0118	0.0016	0.0073	0.0262	0.0043	0.3635	0.0103	0.0016
PF3D7_1316100	inositol polyphosphate kinase, putative	Nucleus	Soluble	0.0004	0.1189	0.0002	0	0.0004	0.0001	0.0001	0.8797	0.0001	0
PF3D7_1316700	conserved protein, unknown function	Endoplasmic reticulum	Soluble	0.0027	0.0142	0.4986	0.254	0.0046	0.2157	0.0072	0.0018	0.0002	0.0009
PF3D7_1316800	protein transport protein SEC20, putative	Endoplasmic reticulum	Membrane	0.0158	0.0192	0.6248	0.0001	0.1834	0.0442	0.0426	0.0277	0.0416	0.0005
PF3D7_1316900	conserved protein, unknown function	Nucleus	Soluble	0.0029	0.1776	0.002	0.0001	0.0098	0.0133	0.0011	0.792	0.0011	0.0001
PF3D7_1317200	AP2 domain transcription factor AP2-G3, putative	Cytoplasm	Soluble	0.0036	0.5262	0.0024	0.001	0.0156	0.0522	0.0008	0.3978	0.0003	0.0001
PF3D7_1317300	conserved Plasmodium protein, unknown function	Nucleus	Soluble	0.01	0.3903	0.0398	0.001	0.0404	0.0758	0.0051	0.4327	0.0043	0.0006
PF3D7_1317500	conserved protein, unknown function	Golgi apparatus	Membrane	0.1048	0.012	0.1246	0.0132	0.448	0.0693	0.2031	0.015	0.0068	0.0032
PF3D7_1317700	conserved Plasmodium protein, unknown function	Cytoplasm	Soluble	0.0014	0.568	0.0032	0.0005	0.003	0.006	0.0042	0.4126	0.0008	0.0002
PF3D7_1317800	40S ribosomal protein S19	Cytoplasm	Soluble	0.0008	0.6264	0.0001	0.0008	0	0.0002	0.003	0.3497	0.0186	0.0003
PF3D7_1318400	structural maintenance of chromosomes protein 2, putative	Cytoplasm	Soluble	0.0041	0.5618	0.0088	0	0.0397	0.0076	0.0075	0.3681	0.0005	0.0019
PF3D7_1319400	conserved Plasmodium protein, unknown function	Nucleus	Soluble	0.0002	0.0636	0.0006	0	0.0005	0.0003	0.0001	0.9348	0	0
PF3D7_1319600	ACDC domain-containing protein, putative	Nucleus	Soluble	0.0028	0.351	0.0047	0.0002	0.0122	0.0339	0.0012	0.5931	0.0008	0.0001
PF3D7_1319900	conserved Plasmodium protein, unknown function	Endoplasmic reticulum	Soluble	0.0065	0.0589	0.7314	0.0208	0.0551	0.1049	0.0046	0.0175	0.0002	0.0001
PF3D7_1320000	golgi protein 1	Cytoplasm	Soluble	0.0086	0.3494	0.1687	0.0379	0.037	0.2823	0.0087	0.104	0.0028	0.0006
PF3D7_1320700	conserved Plasmodium protein, unknown function	Nucleus	Soluble	0.0082	0.4483	0.0068	0.0004	0.0265	0.0143	0.001	0.4934	0.0009	0.0002
PF3D7_1320800	dihydrolipoyllysine-residue succinyltransferase component of 2-oxoglutarate dehydrogenase complex	Mitochondrion	Soluble	0.0001	0.0263	0.0003	0.0001	0.0001	0.0001	0.9688	0.0017	0.0014	0.0012
PF3D7_1321100	conserved Plasmodium protein, unknown function	Nucleus	Soluble	0.004	0.2892	0.1045	0.0011	0.0899	0.0242	0.0114	0.4734	0.0018	0.0004
PF3D7_1321300	conserved Plasmodium membrane protein, unknown function	Cytoplasm	Soluble	0.0125	0.4318	0.1707	0.0008	0.108	0.1674	0.0032	0.1036	0.002	0.0001
PF3D7_1321500	3',5'-cyclic nucleotide phosphodiesterase, putative	Lysosome/Vacuole	Membrane	0.1118	0.0081	0.3156	0.0001	0.1571	0.3793	0.0032	0.0236	0.0013	0.0001
PF3D7_1321700	splicing factor 1	Nucleus	Soluble	0	0.0019	0	0	0	0	0	0.9981	0	0
PF3D7_1321800	protein transport protein SFT2, putative	Endoplasmic reticulum	Membrane	0.0623	0.0003	0.5485	0	0.2834	0.0943	0.0088	0.001	0.0012	0.0002
PF3D7_1321900	conserved protein, unknown function	Extracellular	Soluble	0.0055	0.0275	0.0032	0.9261	0.0049	0.0081	0.0189	0.0056	0	0
PF3D7_1322000	nucleoside-diphosphatase, putative	Endoplasmic reticulum	Membrane	0.0046	0.0059	0.5474	0.0021	0.3218	0.1014	0.0067	0.0098	0.0003	0
PF3D7_1322100	histone-lysine N-methyltransferase SET2	Nucleus	Soluble	0.0012	0.2608	0.0004	0.0001	0.0017	0.0117	0.0001	0.7239	0.0001	0
PF3D7_1322200	conserved Plasmodium protein, unknown function	Cytoplasm	Soluble	0.0041	0.8284	0.0026	0.0001	0.0088	0.0426	0.0002	0.1128	0.0003	0
PF3D7_1322300	conserved Plasmodium protein, unknown function	Nucleus	Soluble	0.001	0.339	0.0035	0	0.0086	0.0189	0.0003	0.6286	0.0001	0
PF3D7_1322500	palmitoyltransferase DHHC5	Endoplasmic reticulum	Membrane	0.1095	0.0039	0.5565	0.0002	0.0755	0.2405	0.0024	0.0087	0.0027	0
PF3D7_1323000	beta-hydroxyacyl-ACP dehydratase	Extracellular	Soluble	0.0151	0.0601	0.3106	0.3327	0.0235	0.0427	0.1421	0.0059	0.0264	0.0409
PF3D7_1323200	V-type proton ATPase subunit G, putative	Cytoplasm	Soluble	0.0412	0.3813	0.0185	0.0078	0.0343	0.2327	0.0204	0.2537	0.0018	0.0081
PF3D7_1323600	conserved protein, unknown function	Endoplasmic reticulum	Soluble	0.0057	0.0267	0.8521	0.0445	0.0107	0.0189	0.0271	0.0119	0.0002	0.0022
PF3D7_1324300	conserved Plasmodium membrane protein, unknown function	Nucleus	Soluble	0.0041	0.4411	0.0057	0.0009	0.0041	0.0816	0.0033	0.4567	0.0025	0.0001
PF3D7_1324700	SNARE protein, putative	Golgi apparatus	Membrane	0.222	0.1526	0.0331	0.003	0.3393	0.0799	0.0879	0.0757	0.0042	0.0023
PF3D7_1324800	dihydrofolate synthase/folylpolyglutamate synthase	Cytoplasm	Soluble	0.0033	0.669	0.0096	0.0007	0.0138	0.0381	0.001	0.26	0.0041	0.0003
PF3D7_1324900	L-lactate dehydrogenase	Peroxisome	Soluble	0.0011	0.3948	0.0027	0.0007	0.0001	0.0074	0.0532	0.0017	0.5128	0.0256
PF3D7_1325500	conserved Plasmodium protein, unknown function	Nucleus	Soluble	0.0044	0.2572	0.0068	0.0011	0.0072	0.0066	0.1493	0.5621	0.004	0.0013
PF3D7_1325900	conserved Plasmodium protein, unknown function	Cytoplasm	Soluble	0.0062	0.5912	0.0053	0.0007	0.0112	0.0678	0.0006	0.3165	0.0005	0.0001
PF3D7_1326000	conserved Plasmodium protein, unknown function	Endoplasmic reticulum	Membrane	0.0149	0.0331	0.3543	0.0031	0.1539	0.0192	0.3227	0.0295	0.0686	0.0007
PF3D7_1326200	conserved Plasmodium protein, unknown function	Cytoplasm	Soluble	0.0037	0.5945	0.0451	0.0008	0.0284	0.0501	0.0015	0.2746	0.0011	0.0001
PF3D7_1326700	conserved Apicomplexan protein, unknown function	Cytoplasm	Soluble	0.01	0.3862	0.05	0.0022	0.1063	0.0169	0.0682	0.2901	0.06	0.0102
PF3D7_1326800	syntaxin, Qa-SNARE family	Endoplasmic reticulum	Membrane	0.029	0.0452	0.341	0.0005	0.3291	0.151	0.0212	0.0753	0.007	0.0008
PF3D7_1327000	conserved Plasmodium protein, unknown function	Nucleus	Soluble	0.0028	0.2437	0.2092	0.0001	0.1558	0.0374	0.0071	0.3318	0.0119	0.0002
PF3D7_1327100	conserved protein, unknown function	Endoplasmic reticulum	Membrane	0.0744	0.0041	0.5782	0.117	0.0741	0.1439	0.0028	0.0048	0.0005	0.0003
PF3D7_1327300	conserved Plasmodium protein, unknown function	Nucleus	Soluble	0.0049	0.1671	0.0013	0.0001	0.0439	0.0045	0.0001	0.7768	0.0003	0.0011
PF3D7_1327500	conserved protein, unknown function	Nucleus	Soluble	0.038	0.2997	0.0281	0.0016	0.0479	0.0247	0.0473	0.5057	0.0047	0.0024
PF3D7_1328200	conserved Plasmodium protein, unknown function	Cytoplasm	Soluble	0.0019	0.5904	0.0014	0.0001	0.0046	0.0172	0.0003	0.3838	0.0003	0
PF3D7_1328300	conserved protein, unknown function	Lysosome/Vacuole	Soluble	0.0629	0.0253	0.2917	0.0003	0.0906	0.4516	0.013	0.0592	0.0025	0.0029
PF3D7_1328500	alpha/beta-hydrolase, putative	Cytoplasm	Soluble	0.0059	0.5174	0.0108	0.0016	0.0281	0.0572	0.0019	0.3736	0.0033	0.0002
PF3D7_1328600	conserved Plasmodium protein, unknown function	Cytoplasm	Soluble	0.0113	0.5808	0.051	0.0004	0.047	0.0688	0.0026	0.2281	0.0087	0.0012
PF3D7_1329000	DNA-directed RNA polymerase III subunit RPC1, putative	Cytoplasm	Soluble	0.0045	0.6167	0.0017	0.0002	0.0027	0.0084	0.0008	0.363	0.0017	0.0002
PF3D7_1329100	myosin F, putative	Cytoplasm	Soluble	0.0061	0.7256	0.0018	0.0006	0.0037	0.0111	0.0007	0.2475	0.0027	0.0003
PF3D7_1329200	conserved Plasmodium protein, unknown function	Nucleus	Soluble	0.0015	0.2649	0.0011	0	0.0024	0.0016	0.0021	0.7259	0.0003	0.0001
PF3D7_1329500	conserved protein, unknown function	Nucleus	Soluble	0.0026	0.3839	0.001	0.0002	0.0016	0.0108	0.0002	0.599	0.0007	0
PF3D7_1329800	conserved Plasmodium protein, unknown function	Cytoplasm	Soluble	0.0099	0.2777	0.2033	0.004	0.0694	0.0786	0.1509	0.137	0.0501	0.0191
PF3D7_1330300	DnaJ protein, putative	Mitochondrion	Membrane	0.0009	0.0023	0.0133	0.0001	0.0044	0.0001	0.9702	0.0003	0.0083	0.0002
PF3D7_1330400	ER lumen protein retaining receptor 1, putative, unspecified product	Golgi apparatus	Membrane	0.0293	0	0.3609	0	0.5389	0.0698	0.0007	0.0001	0.0001	0
PF3D7_1330500	CTLH domain-containing protein, putative	Nucleus	Soluble	0.0002	0.1149	0.0004	0	0.0007	0.0003	0.0001	0.8833	0	0
PF3D7_1330800	RNA-binding protein, putative	Nucleus	Soluble	0	0.0017	0.0001	0	0.0002	0	0	0.9979	0	0
PF3D7_1331000	protein kinase, putative	Nucleus	Soluble	0.0053	0.3474	0.0356	0.0033	0.0337	0.0168	0.0602	0.4871	0.0102	0.0005
PF3D7_1331100	DNA polymerase theta, putative	Cytoplasm	Soluble	0.0474	0.4459	0.0427	0.0106	0.0342	0.2046	0.0069	0.2017	0.0056	0.0004
PF3D7_1332000	syntaxin, Qa-SNARE family	Golgi apparatus	Membrane	0.0109	0.0077	0.3322	0.0001	0.5456	0.0777	0.0087	0.0165	0.0003	0.0005
PF3D7_1332200	conserved protein, unknown function	Nucleus	Soluble	0.0022	0.245	0.0006	0	0.0038	0.0007	0.0001	0.7469	0.0007	0.0001
PF3D7_1332800	eukaryotic translation initiation factor 6, putative	Cytoplasm	Soluble	0.0051	0.7738	0.0074	0.009	0.0031	0.0508	0.0115	0.0597	0.051	0.0286
PF3D7_1332900	isoleucine--tRNA ligase, putative	Cytoplasm	Soluble	0.0084	0.4492	0.0613	0.0018	0.0353	0.0781	0.2549	0.0936	0.0154	0.002
PF3D7_1333200	ubiquitin-activating enzyme	Cell membrane	Membrane	0.5146	0.0032	0.3473	0.0034	0.0306	0.0774	0.0145	0.0057	0.0022	0.001
PF3D7_1333500	conserved Plasmodium protein, unknown function	Mitochondrion	Soluble	0.0057	0.1196	0.0311	0.0028	0.0203	0.007	0.4676	0.334	0.0085	0.0035
PF3D7_1333800	Voldacs domain-containing protein, putative	Nucleus	Soluble	0	0.0291	0.0005	0	0.0015	0.001	0.0003	0.9676	0	0
PF3D7_1333900	conserved Plasmodium protein, unknown function	Cytoplasm	Soluble	0.005	0.5969	0.0133	0.0014	0.0207	0.0243	0.154	0.1705	0.0113	0.0025
PF3D7_1334000	RING zinc finger protein, putative	Nucleus	Soluble	0.0045	0.0944	0.0185	0.0002	0.0307	0.03	0.0021	0.8189	0.0006	0.0002
PF3D7_1334100	conserved protein, unknown function	Nucleus	Soluble	0.0008	0.1309	0.0016	0	0.0019	0.0012	0.0004	0.8627	0.0003	0
PF3D7_1334200	chaperone binding protein, putative	Cytoplasm	Soluble	0.0049	0.5858	0.0106	0.0001	0.0292	0.0186	0.0007	0.3494	0.0006	0.0001
PF3D7_1334400	MSP7-like protein	Endoplasmic reticulum	Soluble	0.0027	0.0021	0.5169	0.4272	0.0099	0.0231	0.0123	0.0054	0	0.0005
PF3D7_1334800	MSP7-like protein	Extracellular	Soluble	0.0115	0.0041	0.3763	0.5338	0.0028	0.0612	0.0072	0.0029	0	0.0002
PF3D7_1335100	merozoite surface protein 7	Endoplasmic reticulum	Soluble	0.0049	0.0131	0.7453	0.1344	0.0148	0.072	0.0087	0.0065	0.0001	0.0003
PF3D7_1335300	reticulocyte binding protein 2 homologue b	Endoplasmic reticulum	Soluble	0.0186	0.1424	0.4338	0.0042	0.235	0.0846	0.0078	0.0708	0.0002	0.0026
PF3D7_1335400	reticulocyte binding protein 2 homologue a	Endoplasmic reticulum	Membrane	0.0566	0.0609	0.3736	0.002	0.3308	0.0815	0.032	0.0543	0.0015	0.0067
PF3D7_1335600	conserved Plasmodium protein, unknown function	Cytoplasm	Soluble	0.0137	0.3599	0.1402	0.0208	0.1387	0.1029	0.0647	0.146	0.0119	0.0013
PF3D7_1335700	conserved oligomeric Golgi complex subunit 3, putative	Nucleus	Soluble	0.0009	0.4403	0.0105	0.0001	0.0187	0.0679	0.0006	0.4605	0.0005	0
PF3D7_1335900	thrombospondin-related anonymous protein	Cell membrane	Membrane	0.4641	0.0006	0.3454	0.0217	0.0859	0.0687	0.0112	0.0016	0.0006	0.0002
PF3D7_1337200	1-deoxy-D-xylulose 5-phosphate synthase	Endoplasmic reticulum	Membrane	0.062	0.0567	0.4295	0.0813	0.1233	0.1498	0.0421	0.0356	0.0126	0.0071
PF3D7_1337400	zinc finger protein, putative	Nucleus	Soluble	0.0025	0.3269	0.0031	0.0003	0.0048	0.0096	0.0027	0.6495	0.0005	0.0002
PF3D7_1337700	conserved Plasmodium protein, unknown function	Cytoplasm	Soluble	0.0045	0.4938	0.0224	0.0006	0.0295	0.0439	0.0133	0.381	0.0013	0.0096
PF3D7_1337800	calcium-dependent protein kinase 5	Nucleus	Soluble	0.0036	0.386	0.0032	0.0001	0.0034	0.0096	0.0002	0.5934	0.0003	0.0003
PF3D7_1338100	26S proteasome regulatory subunit RPN3, putative	Nucleus	Soluble	0.0018	0.3247	0.0087	0.0001	0.0046	0.0047	0.0018	0.6524	0.001	0.0002
PF3D7_1338300	elongation factor 1-gamma, putative	Nucleus	Soluble	0.0179	0.3759	0.0581	0.0035	0.0233	0.0357	0.0084	0.4662	0.0099	0.001
PF3D7_1339000	conserved Plasmodium protein, unknown function	Cytoplasm	Soluble	0.0163	0.3664	0.1656	0.043	0.075	0.1151	0.1086	0.0606	0.0467	0.0027
PF3D7_1339300	conserved Plasmodium protein, unknown function	Nucleus	Soluble	0.0003	0.0035	0.0001	0.0001	0.0001	0	0.0004	0.9954	0	0
PF3D7_1339800	mitotic-spindle organizing protein 1, putative	Cytoplasm	Soluble	0.0036	0.4971	0.0097	0.0048	0.0065	0.0174	0.0762	0.3765	0.0045	0.0035
PF3D7_1340600	RNA lariat debranching enzyme, putative	Nucleus	Soluble	0.0153	0.307	0.027	0.0057	0.0338	0.0699	0.0046	0.5323	0.0027	0.0018
PF3D7_1340800	mitochondrial pyruvate carrier protein 1, putative	Mitochondrion	Membrane	0.0061	0.0269	0.204	0.0076	0.0117	0.001	0.5227	0.0073	0.2122	0.0004
PF3D7_1341500	inner membrane complex suture component, putative	Cytoplasm	Soluble	0.009	0.7352	0.0119	0.008	0.0107	0.0726	0.0091	0.128	0.0139	0.0016
PF3D7_1341600	GPI mannosyltransferase 3	Endoplasmic reticulum	Membrane	0.0442	0.0001	0.702	0.0003	0.1312	0.1211	0.0007	0.0002	0.0002	0
PF3D7_1342600	myosin A	Cytoplasm	Soluble	0.0615	0.526	0.0439	0.0028	0.0233	0.0398	0.0074	0.1011	0.1901	0.0041
PF3D7_1342900	AP2 domain transcription factor, putative	Cytoplasm	Soluble	0.0074	0.6248	0.0049	0.0007	0.0103	0.0886	0.0005	0.2619	0.0009	0
PF3D7_1343100	conserved Plasmodium protein, unknown function	Nucleus	Soluble	0.0038	0.083	0.0096	0.0007	0.0105	0.0046	0.0112	0.8729	0.0034	0.0001
PF3D7_1343200	tRNA guanosine-2'-O-methyltransferase, putative	Cytoplasm	Soluble	0.0283	0.5253	0.0351	0.0199	0.0236	0.0544	0.0327	0.2467	0.028	0.0059
PF3D7_1343400	DNA repair protein RAD5, putative	Cytoplasm	Soluble	0.0072	0.5515	0.0202	0.0008	0.0234	0.0343	0.0082	0.3399	0.0128	0.0018
PF3D7_1343600	UDP-N-acetylglucosamine pyrophosphorylase, putative	Cytoplasm	Soluble	0.0091	0.6032	0.0389	0.0083	0.0319	0.1364	0.0098	0.1571	0.0039	0.0015
PF3D7_1343800	conserved Plasmodium protein, unknown function	Nucleus	Soluble	0.0068	0.4512	0.0022	0.0001	0.0038	0.0095	0.0018	0.5236	0.0009	0.0002
PF3D7_1343900	U4/U6 small nuclear ribonucleoprotein PRP4, putative	Nucleus	Soluble	0.0055	0.4248	0.0088	0.0025	0.0102	0.0301	0.0037	0.5121	0.0019	0.0005
PF3D7_1344800	aspartate carbamoyltransferase	Endoplasmic reticulum	Membrane	0.0847	0.0091	0.7496	0.0007	0.0888	0.0362	0.0134	0.0042	0.0049	0.0084
PF3D7_1344900	conserved Plasmodium protein, unknown function	Nucleus	Soluble	0.0016	0.2481	0.0025	0.0001	0.003	0.0193	0.0006	0.7241	0.0008	0
PF3D7_1345100	thioredoxin 2	Extracellular	Soluble	0.0017	0.0173	0.1272	0.8018	0.0127	0.0035	0.0315	0.0037	0.0006	0
PF3D7_1345600	inner membrane complex protein	Nucleus	Soluble	0.0021	0.2921	0.0004	0.0003	0.0013	0.0016	0.0011	0.6996	0.0007	0.0008
PF3D7_1346000	dynactin subunit 2, putative	Cytoplasm	Soluble	0.0019	0.6066	0.0107	0.0001	0.0396	0.054	0.0009	0.2859	0.0003	0.0001
PF3D7_1346200	nuclear import protein MOG1, putative	Cytoplasm	Soluble	0.0032	0.5443	0.0452	0.0123	0.0121	0.2177	0.0107	0.148	0.0024	0.0041
PF3D7_1346400	VPS13 domain-containing protein, putative	Cytoplasm	Soluble	0.0041	0.603	0.0013	0.0001	0.0046	0.0132	0.0004	0.3726	0.0007	0.0001
PF3D7_1346500	conserved Plasmodium protein, unknown function	Nucleus	Soluble	0.0013	0.1302	0.0028	0.0001	0.0043	0.0034	0.0013	0.856	0.0005	0.0001
PF3D7_1346900	conserved Plasmodium protein, unknown function	Nucleus	Soluble	0.0003	0.0644	0.0008	0.0003	0.0004	0.0015	0.0054	0.9257	0.001	0.0001
PF3D7_1347000	WD repeat-containing protein 92, putative	Cytoplasm	Soluble	0.0052	0.695	0.0089	0.0796	0.0009	0.1036	0.0134	0.0601	0.0229	0.0103
PF3D7_1347200	nucleoside transporter 1	Cell membrane	Membrane	0.3767	0	0.1918	0	0.1649	0.2647	0.0017	0.0001	0.0001	0
PF3D7_1347300	conserved Plasmodium membrane protein, unknown function	Endoplasmic reticulum	Membrane	0.0876	0	0.6239	0	0.2559	0.0321	0.0004	0.0001	0.0001	0
PF3D7_1347400	conserved Plasmodium protein, unknown function	Endoplasmic reticulum	Membrane	0.0116	0	0.7448	0	0.2414	0.001	0.0009	0.0001	0.0002	0
PF3D7_1347700	ethanolamine-phosphate cytidylyltransferase	Cytoplasm	Soluble	0.0043	0.5348	0.0078	0.0017	0.0054	0.0324	0.0067	0.388	0.0175	0.0014
PF3D7_1347900	conserved Plasmodium protein, unknown function	Cytoplasm	Soluble	0.004	0.6533	0.0294	0.0015	0.0299	0.0973	0.0203	0.162	0.0021	0.0002
PF3D7_1348000	conserved Plasmodium protein, unknown function	Cytoplasm	Soluble	0.0081	0.4015	0.1017	0.0002	0.0706	0.0658	0.0024	0.3477	0.0016	0.0004
PF3D7_1348200	step II splicing factor, putative	Mitochondrion	Soluble	0.0041	0.0639	0.001	0.0041	0.0027	0.0005	0.6121	0.3084	0.0026	0.0004
PF3D7_1348400	conserved Plasmodium membrane protein, unknown function	Cytoplasm	Soluble	0.0036	0.5168	0.0043	0.0003	0.0075	0.0633	0.0008	0.4028	0.0006	0
PF3D7_1348800	E1-E2 ATPase, putative	Endoplasmic reticulum	Membrane	0.1946	0.0028	0.4757	0.0001	0.1256	0.1817	0.0029	0.0149	0.0017	0
PF3D7_1349000	conserved Plasmodium protein, unknown function	Cytoplasm	Soluble	0.0072	0.3692	0.0982	0.0026	0.0743	0.0454	0.0392	0.3562	0.0076	0.0003
PF3D7_1349300	tyrosine kinase-like protein	Cytoplasm	Soluble	0.0034	0.6626	0.0024	0.0005	0.0118	0.0728	0.0014	0.2425	0.0023	0.0003
PF3D7_1349500	conserved Plasmodium protein, unknown function	Nucleus	Soluble	0.0029	0.4567	0.0041	0.0003	0.0064	0.0284	0.0007	0.4997	0.0006	0.0001
PF3D7_1350100	lysine--tRNA ligase	Cytoplasm	Soluble	0.0045	0.427	0.0247	0.0121	0.0023	0.0139	0.3744	0.0336	0.0477	0.0598
PF3D7_1350500	conserved Plasmodium protein, unknown function	Endoplasmic reticulum	Membrane	0.0262	0.0478	0.4081	0.0599	0.2604	0.1259	0.0229	0.045	0.0031	0.0007
PF3D7_1350800	conserved Plasmodium protein, unknown function	Cytoplasm	Soluble	0.0061	0.4802	0.0233	0.0009	0.0391	0.0372	0.0058	0.4065	0.0005	0.0003
PF3D7_1351300	conserved Plasmodium membrane protein, unknown function	Endoplasmic reticulum	Membrane	0.0719	0.0003	0.3795	0	0.1964	0.3499	0.0009	0.0008	0.0003	0
PF3D7_1351700	inner membrane complex protein 1f, putative	Cytoplasm	Soluble	0.0441	0.7041	0.0097	0.004	0.0347	0.1172	0.0044	0.0695	0.0109	0.0013
PF3D7_1351800	conserved Plasmodium protein, unknown function	Extracellular	Soluble	0.0041	0.0035	0.2847	0.6357	0.0182	0.0278	0.0148	0.0092	0	0.0019
PF3D7_1352100	ABC transporter B family member 6, putative	Endoplasmic reticulum	Membrane	0.0584	0.0079	0.3122	0.0003	0.1249	0.1717	0.282	0.0128	0.0282	0.0016
PF3D7_1352200	U3 small nucleolar RNA-associated protein 15, putative	Cytoplasm	Soluble	0.0115	0.4315	0.0979	0.0052	0.0526	0.026	0.0847	0.2359	0.0498	0.0049
PF3D7_1352400	conserved Plasmodium protein, unknown function	Cytoplasm	Soluble	0.0066	0.6971	0.0068	0.0028	0.0045	0.1406	0.0015	0.134	0.0058	0.0003
PF3D7_1352500	thioredoxin-related protein, putative	Cell membrane	Membrane	0.4818	0.0001	0.4666	0.0011	0.0421	0.0044	0.0023	0.0004	0.001	0.0002
PF3D7_1352600	protein kinase, putative	Nucleus	Soluble	0.0026	0.3128	0.0379	0.0012	0.0133	0.0028	0.1049	0.437	0.0872	0.0004
PF3D7_1352700	intron-binding protein aquarius, putative	Nucleus	Soluble	0.001	0.3703	0.004	0.0001	0.0042	0.0162	0.0002	0.6035	0.0004	0
PF3D7_1353000	tryptophan-rich protein, pseudogene	Nucleus	Soluble	0.0036	0.1834	0.1462	0.0001	0.0256	0.0031	0.0024	0.6341	0.0011	0.0005
PF3D7_1353100	Plasmodium exported protein, unknown function	Golgi apparatus	Membrane	0.009	0.0016	0.4396	0.0002	0.4555	0.0045	0.0361	0.0475	0.005	0.0008
PF3D7_1353300	conserved Plasmodium protein, unknown function	Endoplasmic reticulum	Soluble	0.0361	0.2005	0.3454	0.0034	0.1493	0.0728	0.0068	0.1815	0.0037	0.0004
PF3D7_1353700	reactive oxygen species modulator 1, putative	Mitochondrion	Membrane	0.0834	0.0025	0.3288	0.0002	0.1032	0.037	0.4104	0.0029	0.0251	0.0065
PF3D7_1354100	conserved Plasmodium protein, unknown function	Nucleus	Soluble	0.0058	0.3431	0.0305	0.0126	0.0131	0.1319	0.0611	0.3868	0.0137	0.0016
PF3D7_1354200	phosphoinositide phosphatase SAC1	Endoplasmic reticulum	Membrane	0.1336	0.0051	0.5332	0.0001	0.1432	0.1504	0.014	0.0083	0.0121	0.0001
PF3D7_1354400	V-type proton ATPase 21 kDa proteolipid subunit, putative	Lysosome/Vacuole	Membrane	0.1831	0	0.0687	0	0.2475	0.4991	0.0015	0	0	0
PF3D7_1354500	adenylosuccinate synthetase	Cytoplasm	Soluble	0.0226	0.5627	0.026	0.0347	0.008	0.0553	0.0199	0.0395	0.2176	0.0137
PF3D7_1355500	serine/threonine protein phosphatase 5	Cytoplasm	Soluble	0.0019	0.4872	0.0111	0.0006	0.0156	0.0369	0.0019	0.4432	0.0012	0.0005
PF3D7_1355600	PhIL1 interacting protein PIP1	Nucleus	Soluble	0.0022	0.1343	0.0009	0.0007	0.0004	0.0002	0.0014	0.8534	0.0066	0.0001
PF3D7_1355700	NLI interacting factor-like phosphatase, putative	Cytoplasm	Soluble	0.0025	0.7684	0.0037	0.0004	0.016	0.0408	0.0004	0.1673	0.0005	0.0001
PF3D7_1356300	ubiquitin-conjugating enzyme E2, putative	Cytoplasm	Soluble	0.0553	0.4846	0.033	0.0076	0.0584	0.1045	0.0369	0.1911	0.0105	0.0183
PF3D7_1356400	phosphatase 2A regulatory subunit-related protein, putative	Cytoplasm	Soluble	0.0057	0.5277	0.0175	0.0013	0.0412	0.068	0.0026	0.3346	0.0011	0.0004
PF3D7_1356800	serine/threonine protein kinase, putative	Cytoplasm	Soluble	0.0115	0.7284	0.0014	0.0005	0.006	0.0198	0.0003	0.2311	0.0009	0.0001
PF3D7_1357000	elongation factor 1-alpha	Cytoplasm	Soluble	0.0007	0.556	0.0003	0.0004	0	0.0005	0.0019	0.0096	0.4291	0.0015
PF3D7_1357100	elongation factor 1-alpha	Cytoplasm	Soluble	0.0007	0.556	0.0003	0.0004	0	0.0005	0.0019	0.0096	0.4291	0.0015
PF3D7_1357300	dynein light chain, putative	Mitochondrion	Soluble	0.0034	0.2335	0.005	0.0099	0.002	0.0068	0.4494	0.2759	0.0062	0.0079
PF3D7_1357500	DNA helicase, putative	Cytoplasm	Soluble	0.0153	0.577	0.0092	0.0031	0.011	0.0134	0.0093	0.3403	0.0192	0.0023
PF3D7_1357800	T-complex protein 1 subunit delta	Cytoplasm	Soluble	0.0425	0.7829	0.011	0.0023	0.0155	0.0332	0.0009	0.0977	0.0127	0.0012
PF3D7_1358200	conserved Plasmodium protein, unknown function	Cytoplasm	Soluble	0.0034	0.4672	0.0386	0.0003	0.0482	0.0623	0.0038	0.3747	0.0014	0.0001
PF3D7_1358400	conserved Plasmodium protein, unknown function	Endoplasmic reticulum	Membrane	0.0124	0.0008	0.6379	0	0.2232	0.1189	0.0039	0.0025	0.0005	0
PF3D7_1358500	zinc finger protein, putative	Nucleus	Soluble	0.0035	0.4783	0.0029	0.0003	0.0107	0.0212	0.0017	0.4802	0.001	0.0002
PF3D7_1358600	zinc finger protein, putative	Nucleus	Soluble	0.0023	0.2449	0.0016	0.0014	0.0027	0.0372	0.0037	0.7053	0.0007	0.0001
PF3D7_1359000	conserved Plasmodium protein, unknown function	Cytoplasm	Soluble	0.0039	0.5427	0.0493	0.0002	0.039	0.0501	0.0035	0.309	0.0024	0
PF3D7_1359300	exosome complex exonuclease RRP44	Nucleus	Soluble	0.0027	0.4393	0.0049	0.0002	0.0141	0.0075	0.029	0.5004	0.0011	0.0006
PF3D7_1359600	conserved Plasmodium protein, unknown function	Cytoplasm	Soluble	0.0114	0.726	0.0047	0.0009	0.0151	0.0997	0.0008	0.1397	0.0015	0.0001
PF3D7_1359800	ADP-ribosylation factor, putative	Cytoplasm	Soluble	0.0325	0.4671	0.1217	0.0112	0.0932	0.0583	0.0204	0.1823	0.0126	0.0007
PF3D7_1359900	conserved Plasmodium membrane protein, unknown function	Nucleus	Membrane	0.2586	0.0114	0.2551	0.0003	0.1121	0.029	0.0061	0.3179	0.009	0.0004
PF3D7_1360100	RNA-binding protein, putative	Nucleus	Soluble	0.0004	0.1122	0.0001	0.0004	0	0.0001	0.0016	0.8845	0.0005	0
PF3D7_1360400	conserved Plasmodium protein, unknown function	Nucleus	Soluble	0.0045	0.2958	0.0576	0.0032	0.0316	0.0505	0.0129	0.527	0.0143	0.0026
PF3D7_1360500	guanylyl cyclase beta	Endoplasmic reticulum	Membrane	0.3741	0.0018	0.3906	0	0.102	0.1004	0.0043	0.0241	0.0026	0.0001
PF3D7_1360900	RNA-binding protein, putative	Cytoplasm	Soluble	0.0181	0.5281	0.0111	0.0251	0.0079	0.0778	0.0125	0.2753	0.0408	0.0031
PF3D7_1361000	protein arginine N-methyltransferase 5, putative	Cytoplasm	Soluble	0.0049	0.6918	0.0114	0.0064	0.0088	0.0433	0.0086	0.2214	0.0029	0.0005
PF3D7_1361700	cytochrome c oxidase subunit 2, putative	Endoplasmic reticulum	Membrane	0.0475	0.0165	0.337	0.0012	0.0972	0.1624	0.2962	0.0099	0.0291	0.003
PF3D7_1361800	glideosome-associated connector	Cytoplasm	Soluble	0.0167	0.727	0.0085	0.0005	0.0274	0.0285	0.0045	0.1809	0.0054	0.0006
PF3D7_1361900	proliferating cell nuclear antigen 1	Nucleus	Soluble	0.0022	0.4304	0.0107	0.0012	0.0151	0.0744	0.0207	0.439	0.0013	0.0051
PF3D7_1362500	exonuclease, putative	Mitochondrion	Soluble	0.0031	0.3005	0.078	0.0035	0.0254	0.0197	0.4486	0.1059	0.0122	0.003
PF3D7_1362900	conserved Plasmodium protein, unknown function	Nucleus	Soluble	0.0047	0.1518	0.0036	0.0021	0.004	0.0238	0.0009	0.8084	0.0006	0.0001
PF3D7_1363400	polyubiquitin binding protein, putative	Cytoplasm	Soluble	0.0038	0.7121	0.0201	0.001	0.018	0.0678	0.0015	0.1738	0.0018	0.0001
PF3D7_1364100	6-cysteine protein	Cell membrane	Membrane	0.6429	0	0.1656	0.0002	0.0264	0.1643	0.0004	0.0001	0	0
PF3D7_1364200	nucleoporin NUP205, putative	Cytoplasm	Soluble	0.0072	0.7903	0.0068	0.0016	0.0122	0.0312	0.0019	0.1217	0.0266	0.0005
PF3D7_1364300	pre-mRNA-splicing factor ATP-dependent RNA helicase PRP16	Nucleus	Soluble	0.0064	0.4752	0.0052	0.0007	0.0102	0.0151	0.0008	0.4844	0.0018	0.0003
PF3D7_1364400	conserved Plasmodium protein, unknown function	Nucleus	Soluble	0.0078	0.395	0.0087	0.0001	0.0166	0.027	0.0004	0.5434	0.0011	0
PF3D7_1365000	conserved Plasmodium protein, unknown function	Nucleus	Soluble	0.0001	0.0054	0.0002	0	0.0001	0.0001	0.0001	0.9939	0	0
PF3D7_1365100	ribosomal protein S17, putative	Mitochondrion	Membrane	0.0001	0.01	0.0002	0.0006	0	0	0.988	0.0004	0.0006	0
PF3D7_1365200	conserved protein, unknown function	Mitochondrion	Membrane	0.0185	0.0095	0.0112	0.2478	0.2605	0.0178	0.4111	0.0213	0.0014	0.0009
PF3D7_1365300	conserved Plasmodium protein, unknown function	Cytoplasm	Soluble	0.005	0.5123	0.0577	0.0039	0.0282	0.0367	0.0345	0.3046	0.0163	0.0008
PF3D7_1365600	DNA topoisomerase 6 subunit B, putative	Nucleus	Soluble	0.0002	0.2726	0.0042	0	0.0073	0.0042	0.0004	0.7109	0.0001	0.0001
PF3D7_1365800	conserved Plasmodium protein, unknown function	Nucleus	Soluble	0.0031	0.337	0.0033	0.0007	0.0126	0.0025	0.0473	0.592	0.0012	0.0003
PF3D7_1366000	conserved Plasmodium protein, unknown function	Mitochondrion	Soluble	0.0053	0.1634	0.0032	0.0086	0.0053	0.0182	0.4511	0.3362	0.0013	0.0072
PF3D7_1366200	conserved protein, unknown function	Mitochondrion	Membrane	0.0005	0.037	0.0135	0.0019	0.0019	0.0003	0.8897	0.0149	0.0401	0.0002
PF3D7_1366600	signal recognition particle receptor subunit alpha, putative	Cytoplasm	Soluble	0.0122	0.4817	0.0717	0.0075	0.0265	0.0324	0.0409	0.2881	0.0361	0.0028
PF3D7_1367100	U1 small nuclear ribonucleoprotein 70 kDa homolog, putative	Nucleus	Soluble	0.0002	0.0084	0	0.0001	0	0	0.0001	0.9911	0	0
PF3D7_1367700	alanine--tRNA ligase	Endoplasmic reticulum	Soluble	0.0278	0.178	0.2275	0.1794	0.0188	0.1414	0.0539	0.1569	0.0018	0.0144
PF3D7_1367900	conserved Plasmodium protein, unknown function	Endoplasmic reticulum	Membrane	0.0023	0.0025	0.6336	0.0012	0.3356	0.0148	0.0045	0.0053	0.0002	0.0002
PF3D7_1368100	26S proteasome regulatory subunit RPN11, putative	Cytoplasm	Soluble	0.0171	0.3414	0.0877	0.0206	0.0846	0.162	0.0983	0.0583	0.0705	0.0595
PF3D7_1368300	conserved Plasmodium protein, unknown function	Cytoplasm	Soluble	0.0097	0.5511	0.0075	0.0125	0.0146	0.0758	0.0233	0.3033	0.0016	0.0008
PF3D7_1368400	ribosomal protein L1, putative	Nucleus	Soluble	0.0007	0.1068	0.0014	0.0001	0.0011	0.0006	0.0007	0.8881	0.0005	0
PF3D7_1368600	mitochondrial import inner membrane translocase subunit TIM9, putative	Mitochondrion	Membrane	0.0003	0.0046	0.0001	0.0036	0.0001	0	0.9697	0.0213	0	0.0001
PF3D7_1368800	DNA repair endonuclease XPF, putative	Nucleus	Soluble	0.0031	0.4356	0.0141	0.0001	0.0199	0.0155	0.001	0.5102	0.0005	0
PF3D7_1369000	glycosylphosphatidylinositol anchor attachment 1 protein, putative	Endoplasmic reticulum	Membrane	0.1034	0.0006	0.4114	0	0.2438	0.2369	0.0019	0.0012	0.0007	0
PF3D7_1369200	conserved Plasmodium protein, unknown function	Cytoplasm	Soluble	0.0028	0.811	0.0044	0.0003	0.0055	0.0287	0.0003	0.1455	0.0015	0.0001
PF3D7_1371900	Plasmodium exported protein, unknown function	Endoplasmic reticulum	Membrane	0.014	0.0059	0.691	0.0328	0.068	0.0702	0.1055	0.0018	0.0034	0.0074
PF3D7_1372600	rifin	Cell membrane	Membrane	0.5859	0.0005	0.3144	0	0.0383	0.0256	0.0174	0.0051	0.0113	0.0014
PF3D7_1372700	rifin	Cell membrane	Membrane	0.8714	0.0001	0.1014	0.0002	0.0021	0.0008	0.0077	0.0003	0.0064	0.0097
PF3D7_1372800	stevor	Cell membrane	Membrane	0.7789	0	0.1848	0.0004	0.0174	0.0129	0.0046	0.0002	0.0006	0.0003
PF3D7_1373000	rifin	Cell membrane	Membrane	0.846	0	0.1349	0	0.0053	0.0049	0.0044	0.0004	0.0036	0.0005
PF3D7_1373100	rifin	Cell membrane	Membrane	0.7261	0.0002	0.0963	0.0029	0.0037	0.0131	0.0334	0.0007	0.0029	0.1206
PF3D7_1373300	rifin	Cell membrane	Membrane	0.6896	0	0.2758	0.0002	0.0258	0.0047	0.0024	0.0001	0.0003	0.0009
PF3D7_1373400	rifin	Cell membrane	Membrane	0.7917	0.0002	0.1736	0.0003	0.0043	0.0011	0.009	0.0004	0.0092	0.0103
PF3D7_1373500	erythrocyte membrane protein 1, PfEMP1	Nucleus	Soluble	0.0349	0.2675	0.0091	0.0002	0.0045	0.0114	0.0005	0.6703	0.0012	0.0004
PF3D7_1400200	rifin	Cell membrane	Membrane	0.6279	0.0001	0.3481	0.0002	0.0096	0.0028	0.0046	0.0005	0.0044	0.0018
PF3D7_1400300	rifin	Cell membrane	Membrane	0.5596	0	0.3903	0.0001	0.0417	0.0034	0.0032	0.0001	0.0005	0.0012
PF3D7_1400400	rifin	Cell membrane	Membrane	0.9384	0	0.0406	0.0008	0.0021	0.0024	0.0028	0.0002	0.001	0.0117
PF3D7_1400500	rifin	Cell membrane	Membrane	0.7406	0.0001	0.1907	0.0005	0.0119	0.0168	0.0146	0.0006	0.0036	0.0206
PF3D7_1400600	rifin	Cell membrane	Membrane	0.6237	0.0001	0.3574	0.0001	0.0064	0.0022	0.0046	0.0003	0.0046	0.0007
PF3D7_1400700	stevor	Cell membrane	Membrane	0.9655	0	0.0287	0.0002	0.0033	0.002	0.0002	0	0	0
PF3D7_1400800	rifin	Endoplasmic reticulum	Membrane	0.3256	0	0.6327	0	0.0335	0.0026	0.0047	0.0001	0.0005	0.0003
PF3D7_1401100	DnaJ protein, putative	Endoplasmic reticulum	Soluble	0.008	0.2013	0.2872	0.0111	0.1295	0.0844	0.1244	0.0798	0.0346	0.0396
PF3D7_1401400	early transcribed membrane protein 14.1	Mitochondrion	Membrane	0.2827	0.0007	0.0793	0.1922	0.0191	0.0156	0.3603	0.0006	0.001	0.0486
PF3D7_1401500	esterase, putative	Cytoplasm	Soluble	0.0153	0.4583	0.0625	0.0042	0.0091	0.0489	0.0085	0.2488	0.1376	0.0068
PF3D7_1401600	Plasmodium exported protein (PHISTb), unknown function	Nucleus	Membrane	0.0101	0.0081	0.1131	0.0003	0.298	0.0067	0.067	0.4845	0.0083	0.0038
PF3D7_1401800	choline kinase	Nucleus	Soluble	0.0037	0.3857	0.0223	0.0004	0.0115	0.0273	0.0025	0.5422	0.0033	0.001
PF3D7_1402000	conserved Plasmodium protein, unknown function	Cytoplasm	Soluble	0.0094	0.3285	0.1443	0.001	0.1254	0.2523	0.0025	0.1338	0.0026	0.0001
PF3D7_1402300	26S proteasome regulatory subunit RPN6	Cytoplasm	Soluble	0.0018	0.7262	0.0098	0.0004	0.0213	0.0478	0.0007	0.1913	0.0004	0.0004
PF3D7_1403100	condensin complex subunit 1, putative	Nucleus	Soluble	0.002	0.3179	0.0049	0.0001	0.015	0.0115	0.0002	0.6483	0.0003	0
PF3D7_1403400	conserved Plasmodium protein, unknown function	Nucleus	Soluble	0.043	0.3292	0.0754	0.001	0.1222	0.0758	0.0147	0.3334	0.0029	0.0024
PF3D7_1404000	DNA-directed RNA polymerase II subunit RPB4, putative	Cytoplasm	Soluble	0.0012	0.5772	0.014	0.002	0.0131	0.0222	0.0122	0.3573	0.0006	0.0002
PF3D7_1404600	adenylyl cyclase alpha	Endoplasmic reticulum	Membrane	0.0439	0.0016	0.6912	0	0.2172	0.039	0.0032	0.0017	0.0021	0.0001
PF3D7_1404700	conserved Plasmodium protein, unknown function	Endoplasmic reticulum	Soluble	0.0038	0.0419	0.4043	0.3684	0.0087	0.1502	0.0088	0.0126	0.0005	0.0006
PF3D7_1404900	conserved Plasmodium protein, unknown function	Endoplasmic reticulum	Soluble	0.0019	0.0068	0.8196	0.0687	0.0106	0.0692	0.019	0.0029	0.0001	0.0012
PF3D7_1405000	conserved Plasmodium protein, unknown function	Nucleus	Soluble	0.0041	0.3611	0.0674	0.0004	0.0305	0.0168	0.0054	0.5029	0.0109	0.0005
PF3D7_1405200	trafficking protein particle complex subunit 1, putative	Cytoplasm	Soluble	0.005	0.4187	0.0961	0.0075	0.0116	0.0127	0.1836	0.243	0.02	0.0019
PF3D7_1405300	conserved Plasmodium protein, unknown function	Nucleus	Soluble	0.0019	0.3912	0.0033	0.0006	0.0044	0.018	0.0004	0.5796	0.0005	0.0001
PF3D7_1405400	DNA mismatch repair protein, putative	Endoplasmic reticulum	Soluble	0.0118	0.23	0.375	0.0119	0.0838	0.1362	0.0496	0.0906	0.0104	0.0007
PF3D7_1405500	COBW domain-containing protein 1, putative	Cytoplasm	Soluble	0.0063	0.5559	0.0579	0.0217	0.024	0.101	0.0464	0.1725	0.0082	0.0061
PF3D7_1405600	ribonucleoside-diphosphate reductase small chain, putative	Cytoplasm	Soluble	0.0144	0.5767	0.0299	0.0039	0.0465	0.1538	0.0071	0.1543	0.0045	0.0089
PF3D7_1405900	RNA-binding protein, putative	Nucleus	Soluble	0.0001	0.0352	0.0003	0	0.0004	0.0001	0.0002	0.9638	0	0
PF3D7_1406000	RNA-binding protein 8A, putative	Cytoplasm	Soluble	0.0012	0.7743	0.0077	0.0016	0.0025	0.0658	0.0034	0.1186	0.003	0.0219
PF3D7_1406300	glycerophosphodiester phosphodiesterase	Endoplasmic reticulum	Soluble	0.0005	0.0123	0.6576	0.2373	0.0006	0.0884	0.0019	0.0012	0	0.0003
PF3D7_1406400	pentatricopeptide repeat domain-containing protein, putative	Endoplasmic reticulum	Soluble	0.0093	0.1818	0.3238	0.0528	0.0334	0.0854	0.2511	0.056	0.0038	0.0026
PF3D7_1406500	WD repeat-containing protein 65, putative	Cytoplasm	Soluble	0.0024	0.5888	0.003	0	0.011	0.0126	0.0006	0.3813	0.0002	0
PF3D7_1407000	LCCL domain-containing protein	Extracellular	Soluble	0.0153	0.0616	0.039	0.803	0.0032	0.054	0.0014	0.0222	0.0003	0
PF3D7_1407300	pre-mRNA-splicing factor 38B, putative	Nucleus	Soluble	0.0001	0.0045	0	0	0	0	0	0.9954	0	0
PF3D7_1407800	plasmepsin IV	Endoplasmic reticulum	Membrane	0.0791	0.0023	0.4779	0.0003	0.211	0.2196	0.0052	0.0012	0.0027	0.0007
PF3D7_1407900	plasmepsin I	Endoplasmic reticulum	Membrane	0.0439	0.0014	0.6759	0.0007	0.1928	0.0737	0.005	0.001	0.003	0.0025
PF3D7_1408000	plasmepsin II	Endoplasmic reticulum	Membrane	0.0818	0.0024	0.5044	0.0003	0.1172	0.2878	0.0026	0.0012	0.0021	0.0002
PF3D7_1408200	AP2 domain transcription factor AP2-G2, putative	Nucleus	Soluble	0.0016	0.0598	0.0011	0.0001	0.0018	0.0142	0.0001	0.921	0.0003	0
PF3D7_1408400	FANCJ-like helicase, putative	Cytoplasm	Soluble	0.0093	0.5643	0.0074	0.0006	0.01	0.0172	0.0029	0.3836	0.0042	0.0005
PF3D7_1408600	40S ribosomal protein S8e, putative	Nucleus	Soluble	0.0007	0.4772	0.0001	0.0004	0	0.0001	0.0033	0.5166	0.0014	0
PF3D7_1408700	conserved protein, unknown function	Cytoplasm	Soluble	0.0035	0.537	0.0024	0.0001	0.0033	0.0189	0.0003	0.4338	0.0007	0
PF3D7_1408800	conserved Plasmodium protein, unknown function	Nucleus	Soluble	0.0022	0.2736	0.0063	0.0003	0.0467	0.011	0.0213	0.6378	0.0004	0.0003
PF3D7_1409000	WD repeat-containing protein, putative	Nucleus	Soluble	0.0035	0.3296	0.0241	0.001	0.0166	0.049	0.0016	0.5737	0.0008	0.0002
PF3D7_1409300	DNA damage-inducible protein 1, putative	Cytoplasm	Soluble	0.0076	0.5814	0.0169	0.0012	0.0548	0.1838	0.0021	0.1503	0.001	0.0009
PF3D7_1409400	conserved protein, unknown function	Endoplasmic reticulum	Membrane	0.1308	0.0003	0.5955	0	0.2115	0.0585	0.0022	0.0006	0.0006	0
PF3D7_1409800	CUGBP Elav-like family member 2, putative	Cytoplasm	Soluble	0.0067	0.7614	0.0028	0.0012	0.0042	0.015	0.0016	0.1963	0.0103	0.0004
PF3D7_1410100	alpha/beta hydrolase, putative	Nucleus	Soluble	0.0041	0.4044	0.0853	0.0018	0.022	0.0187	0.0345	0.4204	0.0081	0.0007
PF3D7_1410300	WD repeat-containing protein, putative	Nucleus	Soluble	0.002	0.3076	0.0008	0	0.0028	0.0077	0.0003	0.6781	0.0006	0
PF3D7_1410400	rhoptry-associated protein 1	Endoplasmic reticulum	Soluble	0.0245	0.1973	0.4745	0.0453	0.0618	0.0868	0.021	0.0782	0.0037	0.0069
PF3D7_1410600	eukaryotic translation initiation factor 2 subunit gamma, putative	Cytoplasm	Soluble	0.0032	0.6747	0.003	0.0011	0.0003	0.0032	0.0057	0.0284	0.2758	0.0046
PF3D7_1411000	conserved Plasmodium protein, unknown function	Cytoplasm	Soluble	0.0034	0.6128	0.0282	0.0001	0.0321	0.0349	0.0016	0.2849	0.002	0
PF3D7_1411100	conserved Plasmodium membrane protein, unknown function, unspecified product	Golgi apparatus	Membrane	0.0102	0	0.387	0	0.561	0.0414	0.0002	0.0001	0	0
PF3D7_1411300	DnaJ protein, putative	Cytoplasm	Soluble	0.0059	0.7185	0.0158	0.0118	0.0207	0.0748	0.0132	0.1338	0.0044	0.0011
PF3D7_1411400	plastid replication-repair enzyme	Endoplasmic reticulum	Soluble	0.0217	0.192	0.4018	0.1202	0.0281	0.0817	0.0796	0.0661	0.0012	0.0075
PF3D7_1411600	GTP-binding protein Obg1	Endoplasmic reticulum	Soluble	0.0308	0.1174	0.2594	0.088	0.0732	0.0593	0.1311	0.1949	0.0058	0.0401
PF3D7_1412200	conserved Plasmodium protein, unknown function	Cytoplasm	Soluble	0.0068	0.5504	0.0277	0.0032	0.0222	0.139	0.0031	0.2421	0.0051	0.0004
PF3D7_1412300	nuclear transport factor 2, putative	Mitochondrion	Soluble	0.0113	0.2462	0.0806	0.0435	0.0628	0.111	0.2669	0.1656	0.0072	0.0049
PF3D7_1412600	deoxyhypusine synthase	Nucleus	Soluble	0.0641	0.1839	0.1965	0.0104	0.0441	0.0943	0.0367	0.2179	0.1397	0.0123
PF3D7_1412800	glycylpeptide N-tetradecanoyltransferase	Cytoplasm	Soluble	0.0118	0.6575	0.0407	0.0113	0.0163	0.0885	0.0126	0.1264	0.0302	0.0047
PF3D7_1412900	ubiquitin-conjugating enzyme E2, putative	Mitochondrion	Soluble	0.0021	0.1296	0.0026	0.0426	0.0093	0.0231	0.6588	0.1304	0.0008	0.0007
PF3D7_1413500	FeS assembly ATPase SufC	Golgi apparatus	Membrane	0.0029	0.0021	0.3956	0.0085	0.4974	0.009	0.0801	0.0019	0.0023	0.0002
PF3D7_1414600	mRNA-capping enzyme subunit alpha	Nucleus	Soluble	0.0112	0.3523	0.02	0.0009	0.0244	0.0212	0.0161	0.549	0.0029	0.002
PF3D7_1414900	ATP-dependent protease, putative	Mitochondrion	Soluble	0.0085	0.3423	0.0328	0.0047	0.0157	0.0419	0.4545	0.09	0.0075	0.0021
PF3D7_1415000	uracil-DNA glycosylase	Nucleus	Soluble	0.0018	0.0865	0.0011	0.0007	0.0012	0.0004	0.0151	0.8908	0.0016	0.0007
PF3D7_1415100	conserved protein, unknown function	Nucleus	Soluble	0.0318	0.2899	0.099	0.0032	0.0951	0.0484	0.0456	0.3554	0.0271	0.0044
PF3D7_1416200	metacaspase-3, putative	Cytoplasm	Soluble	0.0135	0.8513	0.0022	0.001	0.0065	0.0214	0.0005	0.0982	0.0049	0.0004
PF3D7_1416500	NADP-specific glutamate dehydrogenase	Cytoplasm	Soluble	0.0022	0.8435	0.0024	0.0037	0.0003	0.0081	0.0095	0.0364	0.0892	0.0048
PF3D7_1416600	conserved Plasmodium protein, unknown function	Cytoplasm	Soluble	0.0089	0.6242	0.0012	0.0004	0.0047	0.0156	0.0006	0.3434	0.0009	0.0001
PF3D7_1417000	inner membrane complex protein 1l, putative	Nucleus	Soluble	0.0325	0.1977	0.0092	0.0047	0.0058	0.043	0.0207	0.5881	0.0146	0.0837
PF3D7_1417100	conserved Plasmodium protein, unknown function	Nucleus	Soluble	0.0046	0.3808	0.0032	0.0022	0.0099	0.0067	0.1088	0.4814	0.0022	0.0002
PF3D7_1417200	NOT family protein, putative	Cytoplasm	Soluble	0.0034	0.7002	0.0045	0.0003	0.009	0.026	0.0004	0.2557	0.0005	0.0001
PF3D7_1417300	cysteine protease ATG4, putative	Nucleus	Soluble	0.0013	0.2614	0.0016	0	0.0036	0.0093	0.0003	0.7219	0.0006	0
PF3D7_1417400	rap guanine nucleotide exchange factor, putative, pseudogene	Cytoplasm	Soluble	0.003	0.6832	0.0029	0.0001	0.0114	0.0193	0.0002	0.2797	0.0002	0
PF3D7_1417600	conserved Plasmodium protein, unknown function	Cytoplasm	Soluble	0.0088	0.5712	0.0024	0.0001	0.0082	0.0124	0.0002	0.3964	0.0004	0
PF3D7_1417800	DNA replication licensing factor MCM2	Nucleus	Soluble	0.0007	0.2426	0.0013	0.0001	0.0021	0.004	0.0008	0.7469	0.0006	0.0011
PF3D7_1418100	liver specific protein 1, putative	Cytoplasm	Soluble	0.0048	0.5947	0.0568	0.0095	0.0145	0.1677	0.0029	0.147	0.0011	0.0011
PF3D7_1419200	thioredoxin-like protein, putative	Endoplasmic reticulum	Soluble	0.0056	0.0338	0.6031	0.1008	0.032	0.0215	0.1806	0.0183	0.0035	0.0007
PF3D7_1419400	conserved Plasmodium membrane protein, unknown function	Cytoplasm	Soluble	0.0108	0.3941	0.0966	0.0009	0.1553	0.1967	0.0053	0.1382	0.0019	0.0002
PF3D7_1419800	glutathione reductase	Endoplasmic reticulum	Membrane	0.0103	0.0129	0.8279	0.0081	0.0315	0.0121	0.0853	0.0027	0.0032	0.0059
PF3D7_1419900	cleavage and polyadenylation specificity factor subunit 4, putative	Nucleus	Soluble	0.0015	0.0401	0.0014	0.0004	0.0024	0.0007	0.0046	0.9479	0.0009	0.0001
PF3D7_1420000	splicing factor 3B subunit 4, putative	Nucleus	Soluble	0.0015	0.4651	0.0001	0.0002	0.0003	0.0005	0.0003	0.5319	0.0001	0
PF3D7_1420100	conserved Plasmodium protein, unknown function	Cytoplasm	Soluble	0.0102	0.692	0.009	0.0013	0.0217	0.113	0.0024	0.1451	0.0042	0.0009
PF3D7_1420200	myosin-specific chaperone UNC, putative	Cytoplasm	Soluble	0.0062	0.5424	0.0223	0.0006	0.0287	0.0611	0.0016	0.3361	0.0007	0.0001
[truncated: 240 more rows]
